# Supplementary material for: Effects of Siberian fir terpenes extract Abisil on antioxidant activity, autophagy, transcriptome and proteome of human fibroblasts
Source: Aging (Albany NY). 2021 Aug 24;13(16):20050–80. doi: 10.18632/aging.203448 (PMC8436938; doi:10.18632/aging.203448)
Supplement: Supplementary Table 1 [file aging-13-203448-s002.xlsx]

## Sheet: Low vs Cnt
	Supplementary Table 1. The results of differential gene expression analysis between samples treated with low-concentration Abisil (5 µg/ml) and control non-treated samples.
Gene ID	Symbol	Biotype	Name	RefSeq_Summary	Annotation			Control			5 μg/ml				Cnt	Low	Score	LogCPM rank (%)	Tr.Length rank (%)	LogFC	LogCPM	F	p (QLF test)	FDR (QLF test)	p (LR test)	p (ex. test)	p (Mann-Wh.)	FDR (Mann-Wh.)	p (t-test)	Spearman r	Pearson r	p (Spearman)	p (Pearson)	CPMs:	control_1	control_2	5mkg_1	5mkg_2	5mkg_3
Low vs Cnt								0	0		1	1	1																						0	0	1	1	1
Hi vs Low								-0.25	-0.25		0	0	0																								0	0	0
ENSG00000117133	RPF1	PC	ribosome production factor 1 homolog		GO:0000027 (ribosomal large subunit assembly), GO:0000460 (maturation of 5.8S rRNA), GO:0000470 (maturation of LSU-rRNA), GO:0005730 (nucleolus), GO:0030687 (preribosome, large subunit precursor), GO:0003723 (RNA binding), GO:0005515 (protein binding), GO:0042134 (rRNA primary transcript binding)			1.06086	0.991905		-0.631852	-0.795362	-0.625556				1266.63	84.2688	27.2317	-1.74891	6.57902	360.214	2.31831e-08	0.00014827	7.604e-53	1.53614e-53	0.2	0.354767	0.00593258	-0.866025	-0.998324	0.0576689	8.23185e-05		168.859	160.884	50.8541	45.1908	51.0852
ENSG00000116752	BCAS2	PC	BCAS2, pre-mRNA processing factor		hsa03040 (Spliceosome), GO:0000375 (RNA splicing, via transesterification reactions), GO:0000398 (mRNA splicing, via spliceosome), GO:0008380 (RNA splicing), GO:0000974 (Prp19 complex), GO:0005654 (nucleoplasm), GO:0005662 (DNA replication factor A complex), GO:0005681 (spliceosomal complex), GO:0005730 (nucleolus), GO:0005813 (centrosome), GO:0016607 (nuclear speck), GO:0071011 (precatalytic spl…			0.929188	0.964985		-0.68382	-0.598615	-0.611738				1206.28	77.685	29.9574	-1.63086	6.03159	332.707	3.24614e-08	0.00014827	3.97268e-45	9.25346e-46	0.2	0.354767	0.0022769	-0.866025	-0.9995	0.0576689	1.34056e-05		108.412	111.185	34.0953	36.2913	35.9446
ENSG00000104408	EIF3E	PC	eukaryotic translation initiation factor 3 subunit E		hsa03013 (RNA transport), hsa05160 (Hepatitis C), GO:0000184 (nuclear-transcribed mRNA catabolic process, nonsense-mediated decay), GO:0006413 (translational initiation), GO:0006446 (regulation of translational initiation), GO:0045727 (positive regulation of translation), GO:0045947 (negative regulation of translational initiation), GO:1902416 (positive regulation of mRNA binding), GO:0000785 (ch…			0.842037	1.019		-0.676515	-0.649793	-0.534733				1137.24	94.2083	15.0937	-1.56637	7.89354	302.367	4.86397e-08	0.00014827	1.09283e-45	7.18678e-46	0.2	0.354767	0.052794	-0.866025	-0.992268	0.0576689	0.000815279		369.963	418.506	127.829	130.256	141.236
ENSG00000127125	PPCS	PC	phosphopantothenoylcysteine synthetase	Biosynthesis of coenzyme A (CoA) from pantothenic acid (vitamin B5) is an essential universal pathway in prokaryotes and eukaryotes. PPCS (EC 6.3.2.5), one of the last enzymes in this pathway, converts phosphopantothenate to phosphopantothenoylcysteine (Daugherty et al., 2002 [PubMed 11923312]).[supplied by OMIM, Mar 2008].	hsa00770 (Pantothenate and CoA biosynthesis), hsa01100 (Metabolic pathways), GO:0009108 (coenzyme biosynthetic process), GO:0015937 (coenzyme A biosynthetic process), GO:0005829 (cytosol), GO:0070062 (extracellular vesicular exosome), GO:0004632 (phosphopantothenate--cysteine ligase activity), R-HSA-1430728 (Homo sapiens: Metabolism), R-HSA-196783 (Homo sapiens: Coenzyme A biosynthesis), R-HSA-19…			0.987808	0.955988		-0.703525	-0.572179	-0.668091				1128.95	72.8984	23.2453	-1.68862	5.68005	298.806	5.11354e-08	0.00014827	9.01509e-42	1.08735e-41	0.2	0.354767	0.000195586	-0.866025	-0.999339	0.0576689	2.04021e-05		88.07	86.1052	25.8893	28.5476	26.5828
ENSG00000147400	CETN2	PC	centrin 2	Caltractin belongs to a family of calcium-binding proteins and is a structural component of the centrosome. The high level of conservation from algae to humans and its association with the centrosome suggested that caltractin plays a fundamental role in the structure and function of the microtubule-organizing center, possibly required for the proper duplication and segregation of the centrosome. …	hsa03420 (Nucleotide excision repair), GO:0000086 (G2/M transition of mitotic cell cycle), GO:0000715 (nucleotide-excision repair, DNA damage recognition), GO:0000717 (nucleotide-excision repair, DNA duplex unwinding), GO:0006289 (nucleotide-excision repair), GO:0006294 (nucleotide-excision repair, preincision complex assembly), GO:0007067 (mitotic nuclear division), GO:0007099 (centriole replica…			1.02426	0.969724		-0.799721	-0.527824	-0.666442				1046.21	78.1364	37.1039	-1.71273	6.06186	264.221	8.58907e-08	0.00014827	1.06653e-41	2.88215e-42	0.2	0.354767	0.000395543	-0.866025	-0.997776	0.0576689	0.000125824		116.386	111.995	31.4371	38.3717	34.6732
ENSG00000284121	MIR198	miRNA	microRNA 198					0.884665	0.778687		-0.604503	-0.508479	-0.550369				1016.45	80.4276	0.0681431	-1.42537	6.23875	252.217	1.04443e-07	0.00014827	1.21892e-35	6.58988e-36	0.2	0.354767	0.0312708	-0.866025	-0.996716	0.0576689	0.000225749		125.286	116.271	43.3415	46.4621	45.0752
ENSG00000166012	TAF1D	PC	TATA-box binding protein associated factor, RNA polymerase I subunit D	TAF1D is a member of the SL1 complex, which includes TBP (MIM 600075) and TAF1A (MIM 604903), TAF1B (MIM 604904), and TAF1C (MIM 604905), and plays a role in RNA polymerase I transcription (Wang et al., 2004 [PubMed 15520167]; Gorski et al., 2007 [PubMed 17318177]).[supplied by OMIM, Jun 2009]. Sequence Note: This RefSeq record was created from transcript and genomic sequence data to make the seq…	GO:0006355 (regulation of transcription, DNA-templated), GO:0006361 (transcription initiation from RNA polymerase I promoter), GO:0006362 (transcription elongation from RNA polymerase I promoter), GO:0006363 (termination of RNA polymerase I transcription), GO:0045815 (positive regulation of gene expression, epigenetic), GO:0005654 (nucleoplasm), GO:0005668 (RNA polymerase transcription factor SL1…			0.831246	0.728471		-0.484923	-0.569703	-0.505091				1003.63	86.9176	36.3373	-1.32394	6.8353	247.114	1.13809e-07	0.00014827	4.59067e-35	3.22439e-35	0.2	0.354767	0.0315238	-0.866025	-0.99666	0.0576689	0.000231575		184.577	171.748	72.9294	68.653	71.8892
ENSG00000189057	FAM111B	PC	family with sequence similarity 111 member B	This gene encodes a protein with a trypsin-like cysteine/serine peptidase domain in the C-terminus. Mutations in this gene are associated with an autosomal dominant form of hereditary fibrosing poikiloderma (HFP). Affected individuals display mottled pigmentation, telangiectasia, epidermal atrophy, tendon contractures, and progressive pulmonary fibrosis. Alternative splicing results in multiple t…	GO:0005515 (protein binding)			0.775449	0.834509		-0.534998	-0.577799	-0.497161				996.868	78.673	80.0937	-1.38278	6.09492	244.441	1.19128e-07	0.00014827	7.61634e-34	4.36503e-34	0.2	0.354767	0.0122583	-0.866025	-0.998774	0.0576689	5.15467e-05		105.869	110.376	41.4923	40.2209	42.6481
ENSG00000225630	MTND2P28	u_Pg	mitochondrially encoded NADH:ubiquinone oxidoreductase core subunit 2 pseudogene 28					1.15067	1.50832		-1.08069	-0.656189	-0.922109				995.223	97.3341	26.5588	-2.22832	8.82959	243.793	1.20464e-07	0.00014827	2.37815e-45	1.87748e-45	0.2	0.354767	0.0929431	-0.866025	-0.978696	0.0576689	0.00372081		754.721	967.614	159.15	214.281	177.874
ENSG00000131238	PPT1	PC	palmitoyl-protein thioesterase 1	The protein encoded by this gene is a small glycoprotein involved in the catabolism of lipid-modified proteins during lysosomal degradation. The encoded enzyme removes thioester-linked fatty acyl groups such as palmitate from cysteine residues. Defects in this gene are a cause of infantile neuronal ceroid lipofuscinosis 1 (CLN1, or INCL) and neuronal ceroid lipofuscinosis 4 (CLN4). Two transcript…	hsa00062 (Fatty acid elongation), hsa01100 (Metabolic pathways), hsa01212 (Fatty acid metabolism), hsa04142 (Lysosome), GO:0002084 (protein depalmitoylation), GO:0006898 (receptor-mediated endocytosis), GO:0006907 (pinocytosis), GO:0007042 (lysosomal lumen acidification), GO:0007269 (neurotransmitter secretion), GO:0007399 (nervous system development), GO:0007420 (brain development), GO:0007601 (…			1.08116	0.829545		-0.707217	-0.681269	-0.522221				988.292	90.6226	27.0869	-1.61774	7.28268	241.068	1.26284e-07	0.00014827	3.01276e-39	1.87479e-39	0.2	0.354767	0.0762051	-0.866025	-0.985231	0.0576689	0.00214975		283.974	238.205	80.7886	82.2911	92.1152
ENSG00000095261	PSMD5	PC	proteasome 26S subunit, non-ATPase 5	The 26S proteasome is a multicatalytic proteinase complex with a highly ordered structure composed of 2 complexes, a 20S core and a 19S regulator. The 20S core is composed of 4 rings of 28 non-identical subunits; 2 rings are composed of 7 alpha subunits and 2 rings are composed of 7 beta subunits. The 19S regulator is composed of a base, which contains 6 ATPase subunits and 2 non-ATPase subunits,…	GO:0000165 (MAPK cascade), GO:0000209 (protein polyubiquitination), GO:0002223 (stimulatory C-type lectin receptor signaling pathway), GO:0002479 (antigen processing and presentation of exogenous peptide antigen via MHC class I, TAP-dependent), GO:0006521 (regulation of cellular amino acid metabolic process), GO:0010972 (negative regulation of G2/M transition of mitotic cell cycle), GO:0016579 (p…			1.04179	0.919404		-0.583877	-0.727586	-0.649726				973.095	64.1427	22.3509	-1.73974	5.11382	235.138	1.40193e-07	0.000149637	1.26576e-33	1.56857e-33	0.2	0.354767	0.0319007	-0.866025	-0.996297	0.0576689	0.000270358		61.9495	56.7485	18.7235	16.7587	17.7989
ENSG00000116030	SUMO1	PC	small ubiquitin-like modifier 1	This gene encodes a protein that is a member of the SUMO (small ubiquitin-like modifier) protein family. It functions in a manner similar to ubiquitin in that it is bound to target proteins as part of a post-translational modification system. However, unlike ubiquitin which targets proteins for degradation, this protein is involved in a variety of cellular processes, such as nuclear transport, tr…	hsa03013 (RNA transport), hsa05418 (Fluid shear stress and atherosclerosis), GO:0000122 (negative regulation of transcription from RNA polymerase II promoter), GO:0006281 (DNA repair), GO:0006303 (double-strand break repair via nonhomologous end joining), GO:0016032 (viral process), GO:0016925 (protein sumoylation), GO:0030578 (PML body organization), GO:0031334 (positive regulation of protein co…			0.674742	0.805525		-0.440188	-0.569085	-0.470995				912.418	91.9002	16.7632	-1.24836	7.46832	212.071	2.16009e-07	0.000211347	1.47611e-31	1.25603e-31	0.2	0.354767	0.0386293	-0.866025	-0.993911	0.0576689	0.00056978		258.662	283.396	118.351	108.065	115.809
ENSG00000153140	CETN3	PC	centrin 3	The protein encoded by this gene contains four EF-hand calcium binding domains, and is a member of the centrin protein family. Centrins are evolutionarily conserved proteins similar to the CDC31 protein of S. cerevisiae. Yeast CDC31 is located at the centrosome of interphase and mitotic cells, where it plays a fundamental role in centrosome duplication and separation. Multiple forms of the protei…	GO:0007067 (mitotic nuclear division), GO:0007098 (centrosome cycle), GO:0051301 (cell division), GO:0005730 (nucleolus), GO:0005813 (centrosome), GO:0005814 (centriole), GO:0005509 (calcium ion binding), GO:0005515 (protein binding)			0.947872	0.751478		-0.488572	-0.636238	-0.57454				894.207	78.4771	27.3254	-1.46266	6.08316	205.339	2.47166e-07	0.000223229	2.26772e-31	1.32255e-31	0.2	0.354767	0.0625971	-0.866025	-0.989546	0.0576689	0.00128111		116.964	101.824	41.9546	37.6782	39.4119
ENSG00000174748	RPL15	PC	ribosomal protein L15	Ribosomes, the organelles that catalyze protein synthesis, consist of a small 40S subunit and a large 60S subunit. Together these subunits are composed of 4 RNA species and approximately 80 structurally distinct proteins. This gene encodes a ribosomal protein that is a component of the 60S subunit. The protein belongs to the L15E family of ribosomal proteins. It is located in the cytoplasm. This …	hsa03010 (Ribosome), GO:0000184 (nuclear-transcribed mRNA catabolic process, nonsense-mediated decay), GO:0002181 (cytoplasmic translation), GO:0006364 (rRNA processing), GO:0006412 (translation), GO:0006413 (translational initiation), GO:0006614 (SRP-dependent cotranslational protein targeting to membrane), GO:0019083 (viral transcription), GO:0045471 (response to ethanol), GO:0005634 (nucleus),…			0.758939	0.617152		-0.513269	-0.406037	-0.456785				865.666	96.1417	55.6303	-1.15493	8.36206	194.968	3.06804e-07	0.0002309	5.93091e-29	5.59807e-29	0.2	0.354767	0.0488019	-0.866025	-0.992632	0.0576689	0.000758417		515.36	466.933	212.2	228.728	220.753
ENSG00000136104	RNASEH2B	PC	ribonuclease H2 subunit B	RNase H2 is composed of a single catalytic subunit (A) and two non-catalytic subunits (B and C) and specifically degrades the RNA of RNA:DNA hybrids. The protein encoded by this gene is the non-catalytic B subunit of RNase H2, which is thought to play a role in DNA replication. Multiple transcript variants encoding different isoforms have been found for this gene. Defects in this gene are a cause…	hsa03030 (DNA replication), GO:0001701 (in utero embryonic development), GO:0006401 (RNA catabolic process), GO:0009259 (ribonucleotide metabolic process), GO:0010389 (regulation of G2/M transition of mitotic cell cycle), GO:0010629 (negative regulation of gene expression), GO:0048146 (positive regulation of fibroblast proliferation), GO:0090502 (RNA phosphodiester bond hydrolysis, endonucleolyti…			0.954681	0.928126		-0.783925	-0.541978	-0.556904				860.756	65.1989	43.7905	-1.66024	5.17326	193.205	3.18632e-07	0.0002309	3.30833e-30	4.00725e-30	0.2	0.354767	0.000100624	-0.866025	-0.998032	0.0576689	0.000104737		61.3716	60.2158	16.9899	20.4572	20.226
ENSG00000197170	PSMD12	PC	proteasome 26S subunit, non-ATPase 12	The 26S proteasome is a multicatalytic proteinase complex with a highly ordered structure composed of 2 complexes, a 20S core and a 19S regulator. The 20S core is composed of 4 rings of 28 non-identical subunits; 2 rings are composed of 7 alpha subunits and 2 rings are composed of 7 beta subunits. The 19S regulator is composed of a base, which contains 6 ATPase subunits and 2 non-ATPase subunits,…	hsa03050 (Proteasome), hsa05169 (Epstein-Barr virus infection), GO:0000165 (MAPK cascade), GO:0000209 (protein polyubiquitination), GO:0002223 (stimulatory C-type lectin receptor signaling pathway), GO:0002479 (antigen processing and presentation of exogenous peptide antigen via MHC class I, TAP-dependent), GO:0006521 (regulation of cellular amino acid metabolic process), GO:0010972 (negative reg…			0.648498	0.765202		-0.418926	-0.474573	-0.520201				860.162	85.8019	51.5673	-1.20174	6.7103	192.993	3.20097e-07	0.0002309	4.05328e-28	3.40554e-28	0.2	0.354767	0.0371726	-0.866025	-0.995021	0.0576689	0.000421475		151.638	164.582	71.3113	68.5374	66.3414
ENSG00000109606	DHX15	PC	DEAH-box helicase 15	The protein encoded by this gene is a putative ATP-dependent RNA helicase implicated in pre-mRNA splicing. [provided by RefSeq, Jul 2008].	hsa03040 (Spliceosome), GO:0000398 (mRNA splicing, via spliceosome), GO:0006397 (mRNA processing), GO:0008380 (RNA splicing), GO:0009636 (response to toxic substance), GO:0043279 (response to alkaloid), GO:0005634 (nucleus), GO:0005654 (nucleoplasm), GO:0005689 (U12-type spliceosomal complex), GO:0005730 (nucleolus), GO:0005737 (cytoplasm), GO:0016607 (nuclear speck), GO:0071008 (U2-type post-mRN…			0.730675	0.708936		-0.533881	-0.539446	-0.366284				851.476	89.3535	44.9915	-1.21497	7.13272	189.893	3.4242e-07	0.0002309	7.04488e-29	6.06472e-29	0.2	0.354767	0.000215323	-0.866025	-0.997455	0.0576689	0.000154059		214.396	211.16	88.07	87.7233	99.1654
ENSG00000187109	NAP1L1	PC	nucleosome assembly protein 1 like 1	This gene encodes a member of the nucleosome assembly protein (NAP) family. This protein participates in DNA replication and may play a role in modulating chromatin formation and contribute to the regulation of cell proliferation. Alternative splicing of this gene results in several transcript variants; however, not all have been fully described. [provided by RefSeq, Jul 2008].	GO:0006260 (DNA replication), GO:0006334 (nucleosome assembly), GO:0008284 (positive regulation of cell proliferation), GO:0005634 (nucleus), GO:0016020 (membrane), GO:0042470 (melanosome), GO:0003723 (RNA binding), GO:0005515 (protein binding)			0.799027	0.593501		-0.478987	-0.450431	-0.46311				846.32	97.5215	66.184	-1.16892	8.92989	188.062	3.56505e-07	0.0002309	1.7195e-28	1.65645e-28	0.2	0.354767	0.080968	-0.866025	-0.986483	0.0576689	0.00188256		783.153	678.902	321.768	328.24	325.35
ENSG00000181163	NPM1	PC	nucleophosmin 1	This gene encodes a phosphoprotein which moves between the nucleus and the cytoplasm. The gene product is thought to be involved in several processes including regulation of the ARF/p53 pathway. A number of genes are fusion partners have been characterized, in particular the anaplastic lymphoma kinase gene on chromosome 2. Mutations in this gene are associated with acute myeloid leukemia. More th…	GO:0006281 (DNA repair), GO:0006334 (nucleosome assembly), GO:0006357 (regulation of transcription from RNA polymerase II promoter), GO:0006886 (intracellular protein transport), GO:0006913 (nucleocytoplasmic transport), GO:0006950 (response to stress), GO:0006977 (DNA damage response, signal transduction by p53 class mediator resulting in cell cycle arrest), GO:0007098 (centrosome cycle), GO:000…			0.829272	0.600744		-0.478397	-0.510421	-0.441197				835.365	99.2505	14.2504	-1.19786	10.3008	184.197	3.88661e-07	0.0002309	2.71246e-28	2.68479e-28	0.2	0.354767	0.0871299	-0.866025	-0.983723	0.0576689	0.0024868		2057.16	1755.51	829.846	811.585	851.574
ENSG00000139350	NEDD1	PC	neural precursor cell expressed, developmentally down-regulated 1		GO:0000086 (G2/M transition of mitotic cell cycle), GO:0007067 (mitotic nuclear division), GO:0051301 (cell division), GO:0071539 (protein localization to centrosome), GO:0097711 (NA), GO:0000242 (pericentriolar material), GO:0000922 (spindle pole), GO:0005813 (centrosome), GO:0005814 (centriole), GO:0005829 (cytosol), GO:0036064 (ciliary basal body), GO:0045177 (apical part of cell), GO:0005515 …			0.853708	1.11102		-0.555765	-0.744617	-0.66435				833.863	63.768	56.5588	-1.7487	5.08856	183.67	3.93322e-07	0.0002309	1.49093e-28	1.80523e-28	0.2	0.354767	0.0780412	-0.866025	-0.985241	0.0576689	0.00214765		53.05	63.7987	18.7235	16.1808	17.221
ENSG00000166848	TERF2IP	PC	TERF2 interacting protein	The gene encodes a protein that is part of a complex involved in telomere length regulation. Pseudogenes are present on chromosomes 5 and 22. [provided by RefSeq, Apr 2010]. Publication Note: This RefSeq record includes a subset of the publications that are available for this gene. Please see the Gene record to access additional publications.	GO:0000723 (telomere maintenance), GO:0001933 (negative regulation of protein phosphorylation), GO:0006351 (transcription, DNA-templated), GO:0006355 (regulation of transcription, DNA-templated), GO:0007004 (telomere maintenance via telomerase), GO:0010569 (regulation of double-strand break repair via homologous recombination), GO:0010833 (telomere maintenance via telomere lengthening), GO:001623…			1.05697	0.760882		-0.750633	-0.521206	-0.546011				801.695	83.0934	44.9574	-1.5562	6.45565	172.522	5.10069e-07	0.000285177	1.22958e-29	8.11457e-30	0.2	0.354767	0.0916163	-0.866025	-0.978427	0.0576689	0.00379121		159.959	129.909	44.2662	52.241	51.3164
ENSG00000265794	AC005899.4	processed_transcript						0.738249	0.929709		-0.59927	-0.441328	-0.62736				784.287	72.1744	3.40716	-1.45074	5.62164	166.608	5.89362e-07	0.000286607	3.11933e-26	3.55311e-26	0.2	0.354767	0.0558619	-0.866025	-0.98904	0.0576689	0.00137515		73.7384	84.4871	27.9697	31.4371	27.3918
ENSG00000101132	PFDN4	PC	prefoldin subunit 4	This gene encodes a member of the prefoldin beta subunit family. The encoded protein is one of six subunits of prefoldin, a molecular chaperone complex that binds and stabilizes newly synthesized polypeptides, thereby allowing them to fold correctly. The complex, consisting of two alpha and four beta subunits, forms a double beta barrel assembly with six protruding coiled-coils. [provided by RefS…	GO:0006457 (protein folding), GO:0005634 (nucleus), GO:0005737 (cytoplasm), GO:0005739 (mitochondrion), GO:0005829 (cytosol), GO:0016272 (prefoldin complex), GO:0005515 (protein binding), GO:0051082 (unfolded protein binding), GO:0051087 (chaperone binding), R-HSA-389957 (Homo sapiens: Prefoldin mediated transfer of substrate to CCT/TriC), R-HSA-389958 (Homo sapiens: Cooperation of Prefoldin and …			0.892788	1.23871		-0.648098	-0.903187	-0.58021				783.443	71.7571	10.8773	-1.86428	5.59498	166.324	5.93547e-07	0.000286607	1.42127e-29	1.67126e-29	0.2	0.354767	0.0989777	-0.866025	-0.975477	0.0576689	0.00459295		74.7786	95.5825	24.3868	20.1105	25.6582
ENSG00000181061	HIGD1A	PC	HIG1 hypoxia inducible domain family member 1A		GO:0043066 (negative regulation of apoptotic process), GO:0055114 (oxidation-reduction process), GO:0061418 (regulation of transcription from RNA polymerase II promoter in response to hypoxia), GO:0005654 (nucleoplasm), GO:0005739 (mitochondrion), GO:0005743 (mitochondrial inner membrane), GO:0016021 (integral component of membrane), GO:0043234 (protein complex), GO:0070469 (respiratory chain), R…			0.903589	1.24914		-0.628197	-0.594553	-0.929978				781.495	73.7501	23.9608	-1.87359	5.74118	165.667	6.03337e-07	0.000286607	5.7556e-30	6.72218e-30	0.2	0.354767	0.0974874	-0.866025	-0.97552	0.0576689	0.00458077		82.9846	105.984	27.3918	28.0853	21.8441
ENSG00000137804	NUSAP1	PC	nucleolar and spindle associated protein 1	NUSAP1 is a nucleolar-spindle-associated protein that plays a role in spindle microtubule organization (Raemaekers et al., 2003 [PubMed 12963707]).[supplied by OMIM, Jun 2009].	GO:0000070 (mitotic sister chromatid segregation), GO:0000281 (mitotic cytokinesis), GO:0007076 (mitotic chromosome condensation), GO:0040001 (establishment of mitotic spindle localization), GO:0045840 (positive regulation of mitosis), GO:0005694 (chromosome), GO:0005730 (nucleolus), GO:0005737 (cytoplasm), GO:0005876 (spindle microtubule), GO:0003677 (DNA binding), GO:0003723 (RNA binding), GO:0…			0.635853	0.952041		-0.544859	-0.532059	-0.510976				780.138	87.9652	44.4463	-1.35416	6.96161	165.211	6.10269e-07	0.000286607	4.13557e-27	3.42637e-27	0.2	0.354767	0.113863	-0.866025	-0.973698	0.0576689	0.00510033		174.406	217.632	75.8188	76.5123	77.668
ENSG00000091164	TXNL1	PC	thioredoxin like 1		GO:0034599 (cellular response to oxidative stress), GO:0045454 (cell redox homeostasis), GO:0055114 (oxidation-reduction process), GO:0098869 (NA), GO:0000502 (proteasome complex), GO:0005634 (nucleus), GO:0005737 (cytoplasm), GO:0005829 (cytosol), GO:0070062 (extracellular vesicular exosome), GO:0004791 (thioredoxin-disulfide reductase activity), GO:0015035 (protein disulfide oxidoreductase acti…			0.609698	0.794532		-0.471056	-0.401269	-0.531907				769.083	85.6145	65.8433	-1.19535	6.69429	161.511	6.70191e-07	0.00030034	5.44064e-25	4.77864e-25	0.2	0.354767	0.0650998	-0.866025	-0.988102	0.0576689	0.0015551		145.974	166.2	67.9595	71.4268	65.0701
ENSG00000168288	MMADHC	PC	methylmalonic aciduria and homocystinuria, cblD type	This gene encodes a mitochondrial protein that is involved in an early step of vitamin B12 metabolism. Vitamin B12 (cobalamin) is essential for normal development and survival in humans. Mutations in this gene cause methylmalonic aciduria and homocystinuria type cblD (MMADHC), a disorder of cobalamin metabolism that is characterized by decreased levels of the coenzymes adenosylcobalamin and methy…	GO:0009108 (coenzyme biosynthetic process), GO:0009235 (cobalamin metabolic process), GO:0005737 (cytoplasm), GO:0005739 (mitochondrion), GO:0005829 (cytosol), GO:0005515 (protein binding), R-HSA-1430728 (Homo sapiens: Metabolism), R-HSA-1643685 (Homo sapiens: Disease), R-HSA-196741 (Homo sapiens: Cobalamin (Cbl, vitamin B12) transport and metabolism), R-HSA-196849 (Homo sapiens: Metabolism of wa…			0.74751	1.00601		-0.756481	-0.470337	-0.526699				765.56	86.1511	38.9608	-1.49081	6.75112	160.339	6.90671e-07	0.00030034	4.73567e-28	3.58524e-28	0.2	0.354767	0.0746443	-0.866025	-0.981313	0.0576689	0.00305796		159.381	191.049	54.8993	67.3816	64.7234
ENSG00000116044	NFE2L2	PC	nuclear factor, erythroid 2 like 2	This gene encodes a transcription factor which is a member of a small family of basic leucine zipper (bZIP) proteins. The encoded transcription factor regulates genes which contain antioxidant response elements (ARE) in their promoters; many of these genes encode proteins involved in response to injury and inflammation which includes the production of free radicals. Multiple transcript variants e…	hsa04141 (Protein processing in endoplasmic reticulum), hsa05200 (Pathways in cancer), hsa05225 (Hepatocellular carcinoma), hsa05418 (Fluid shear stress and atherosclerosis), GO:0006366 (transcription from RNA polymerase II promoter), GO:0006954 (inflammatory response), GO:0007568 (aging), GO:0010499 (proteasomal ubiquitin-independent protein catabolic process), GO:0010628 (positive regulation of…			0.706694	0.990936		-0.625208	-0.536211	-0.536211				744.449	67.1323	45.9625	-1.49829	5.29887	150.306	9.01681e-07	0.000341888	1.56165e-23	1.79925e-23	0.138641	0.354767	0.0972858	-0.888523	-0.979795	0.043925	0.00343719		57.442	70.3866	21.613	23.1155	23.1155
ENSG00000173726	TOMM20	PC	translocase of outer mitochondrial membrane 20		GO:0006626 (protein targeting to mitochondrion), GO:0016031 (tRNA import into mitochondrion), GO:0016236 (macroautophagy), GO:0016579 (protein deubiquitination), GO:0030150 (protein import into mitochondrial matrix), GO:0070096 (mitochondrial outer membrane translocase complex assembly), GO:0005739 (mitochondrion), GO:0005741 (mitochondrial outer membrane), GO:0005742 (mitochondrial outer membran…			0.610568	0.800295		-0.452761	-0.448806	-0.509296				738.493	76.416	47.0528	-1.21838	5.92749	151.45	8.73944e-07	0.000341888	8.29314e-23	7.0179e-23	0.2	0.354767	0.0724873	-0.866025	-0.988392	0.0576689	0.00149866		85.9896	98.3564	40.1054	40.2209	38.4873
ENSG00000080824	HSP90AA1	PC	heat shock protein 90 alpha family class A member 1	The protein encoded by this gene is an inducible molecular chaperone that functions as a homodimer. The encoded protein aids in the proper folding of specific target proteins by use of an ATPase activity that is modulated by co-chaperones. Two transcript variants encoding different isoforms have been found for this gene. [provided by RefSeq, Jan 2012].	hsa04141 (Protein processing in endoplasmic reticulum), hsa04151 (PI3K-Akt signaling pathway), hsa04217 (Necroptosis), hsa04612 (Antigen processing and presentation), hsa04621 (NOD-like receptor signaling pathway), hsa04657 (IL-17 signaling pathway), hsa04659 (Th17 cell differentiation), hsa04914 (Progesterone-mediated oocyte maturation), hsa04915 (Estrogen signaling pathway), hsa05200 (Pathways …			0.742081	0.859072		-0.72611	-0.498688	-0.376356				737.457	99.4379	39.8637	-1.33005	10.6265	151.114	8.81986e-07	0.000341888	8.87305e-26	8.88305e-26	0.2	0.354767	0.00733347	-0.866025	-0.991032	0.0576689	0.00101818		2374.65	2575.41	857.007	1003.67	1092.67
ENSG00000136146	MED4	PC	mediator complex subunit 4	This gene encodes a component of the Mediator complex. The Mediator complex interacts with DNA-binding gene-specific transcription factors to modulate transcription by RNA polymerase II. Alternatively spliced transcript variants encoding multiple isoforms have been observed for this gene. [provided by RefSeq, Jul 2012].	hsa04919 (Thyroid hormone signaling pathway), GO:0006357 (regulation of transcription from RNA polymerase II promoter), GO:0006366 (transcription from RNA polymerase II promoter), GO:0006367 (transcription initiation from RNA polymerase II promoter), GO:0030518 (intracellular steroid hormone receptor signaling pathway), GO:0030521 (androgen receptor signaling pathway), GO:0045893 (positive regula…			0.76891	0.739175		-0.457269	-0.407642	-0.643173				734.837	73.5883	29.063	-1.30239	5.72928	150.265	9.02694e-07	0.000341888	6.98736e-24	7.82012e-24	0.2	0.354767	0.000220171	-0.866025	-0.996668	0.0576689	0.000230732		82.9846	81.2509	34.3265	35.5978	29.9346
ENSG00000205302	SNX2	PC	sorting nexin 2	This gene belongs to the sorting nexin family whose members contain the phosphoinositide-binding phox (PX) domain. The encoded protein is a component of the retromer complex which plays a role in protein sorting in the endocytic pathway. This protein may form oligomeric complexes with other family members. Alternate splicing results in multiple transcript variants of this gene. Pseudogenes associ…	hsa04144 (Endocytosis), GO:0006886 (intracellular protein transport), GO:0006897 (endocytosis), GO:0016050 (vesicle organization), GO:0034498 (early endosome to Golgi transport), GO:0042147 (retrograde transport, endosome to Golgi), GO:0051259 (protein oligomerization), GO:0072673 (lamellipodium morphogenesis), GO:0005737 (cytoplasm), GO:0005764 (lysosome), GO:0005768 (endosome), GO:0005829 (cyto…			0.765044	0.648978		-0.586356	-0.34793	-0.479735				715.163	82.5057	19.7274	-1.20483	6.39789	143.952	1.07705e-06	0.000382663	2.64311e-23	2.31666e-23	0.2	0.354767	0.0150317	-0.866025	-0.992137	0.0576689	0.000836065		132.567	122.165	50.7385	60.2158	54.7837
ENSG00000137692	DCUN1D5	PC	defective in cullin neddylation 1 domain containing 5		GO:0008150 (biological_process), GO:0045116 (protein neddylation), GO:0051443 (positive regulation of ubiquitin-protein transferase activity), GO:0000151 (ubiquitin ligase complex), GO:0005575 (cellular_component), GO:0003674 (molecular_function), GO:0005515 (protein binding), GO:0031624 (ubiquitin conjugating enzyme binding), GO:0032182 (small conjugating protein binding), GO:0097602 (cullin fam…			0.667702	0.730605		-0.606148	-0.393025	-0.399134				714.121	80.6575	17.8279	-1.19352	6.25107	143.621	1.0873e-06	0.000382663	5.03148e-23	4.40584e-23	0.2	0.354767	0.000798248	-0.866025	-0.99509	0.0576689	0.000412691		112.11	117.196	45.1908	52.7033	52.4721
ENSG00000228253	MT-ATP8	PC	mitochondrially encoded ATP synthase membrane subunit 8		hsa00190 (Oxidative phosphorylation), hsa01100 (Metabolic pathways), hsa04714 (Thermogenesis), hsa05010 (Alzheimer disease), hsa05012 (Parkinson disease), hsa05016 (Huntington disease), R-HSA-1428517 (Homo sapiens: The citric acid (TCA) cycle and respiratory electron transport), R-HSA-1430728 (Homo sapiens: Metabolism), R-HSA-163200 (Homo sapiens: Respiratory electron transport, ATP synthesis by …			1.89111	1.01387		-1.0048	-1.02964	-0.870532				703.365	97.036	0.988075	-2.50102	8.68912	140.219	1.19981e-06	0.000382663	1.10888e-29	1.08249e-29	0.2	0.354767	0.21938	-0.866025	-0.907114	0.0576689	0.0335051		1056.38	574.189	140.195	137.768	154.065
ENSG00000132646	PCNA	PC	proliferating cell nuclear antigen	The protein encoded by this gene is found in the nucleus and is a cofactor of DNA polymerase delta. The encoded protein acts as a homotrimer and helps increase the processivity of leading strand synthesis during DNA replication. In response to DNA damage, this protein is ubiquitinated and is involved in the RAD6-dependent DNA repair pathway. Two transcript variants encoding the same protein have …	hsa03030 (DNA replication), hsa03410 (Base excision repair), hsa03420 (Nucleotide excision repair), hsa03430 (Mismatch repair), hsa04110 (Cell cycle), hsa04530 (Tight junction), hsa05161 (Hepatitis B), GO:0000082 (G1/S transition of mitotic cell cycle), GO:0000083 (regulation of transcription involved in G1/S transition of mitotic cell cycle), GO:0000722 (telomere maintenance via recombination), …			0.528615	0.602319		-0.446772	-0.378497	-0.305664				702.137	97.7941	45.5877	-0.945247	9.07638	139.833	1.21347e-06	0.000382663	5.50402e-21	5.46948e-21	0.2	0.354767	0.00757192	-0.866025	-0.995315	0.0576689	0.000384681		738.886	777.72	374.818	393.079	413.536
ENSG00000120837	NFYB	PC	nuclear transcription factor Y subunit beta	The protein encoded by this gene is one subunit of a trimeric complex, forming a highly conserved transcription factor that binds with high specificity to CCAAT motifs in the promoter regions in a variety of genes. This gene product, subunit B, forms a tight dimer with the C subunit, a prerequisite for subunit A association. The resulting trimer binds to DNA with high specificity and affinity. Su…	hsa04612 (Antigen processing and presentation), hsa05152 (Tuberculosis), hsa05166 (Human T-cell leukemia virus 1 infection), GO:0006351 (transcription, DNA-templated), GO:0006355 (regulation of transcription, DNA-templated), GO:0045893 (positive regulation of transcription, DNA-templated), GO:0005634 (nucleus), GO:0005654 (nucleoplasm), GO:0016602 (CCAAT-binding factor complex), GO:0032993 (prote…			0.659864	0.636301		-0.463765	-0.408809	-0.423591				700.67	70.982	51.925	-1.12716	5.543	139.372	1.23002e-06	0.000382663	6.62582e-20	7.38479e-20	0.2	0.354767	0.000524337	-0.866025	-0.999541	0.0576689	1.17878e-05		69.3465	68.1907	30.7436	32.0149	31.6682
ENSG00000113739	STC2	PC	stanniocalcin 2	This gene encodes a secreted, homodimeric glycoprotein that is expressed in a wide variety of tissues and may have autocrine or paracrine functions. The encoded protein has 10 of its 15 cysteine residues conserved among stanniocalcin family members and is phosphorylated by casein kinase 2 exclusively on its serine residues. Its C-terminus contains a cluster of histidine residues which may interac…	GO:0006874 (cellular calcium ion homeostasis), GO:0006979 (response to oxidative stress), GO:0007566 (embryo implantation), GO:0010629 (negative regulation of gene expression), GO:0030968 (endoplasmic reticulum unfolded protein response), GO:0033280 (response to vitamin D), GO:0040015 (negative regulation of multicellular organism growth), GO:0043434 (response to peptide hormone), GO:0046697 (dec…			0.638191	0.606309		-0.455563	-0.455563	-0.333373				699.068	78.2131	54.5911	-1.06725	6.06734	136.088	1.35639e-06	0.000382663	2.86104e-20	2.73545e-20	0.138641	0.354767	0.000100616	-0.888523	-0.997765	0.043925	0.000126826		98.472	96.276	45.0752	45.0752	49.236
ENSG00000131051	RBM39	PC	RNA binding motif protein 39	This gene encodes a member of the U2AF65 family of proteins. The encoded protein is found in the nucleus, where it co-localizes with core spliceosomal proteins. It has been shown to play a role in both steroid hormone receptor-mediated transcription and alternative splicing, and it is also a transcriptional coregulator of the viral oncoprotein v-Rel. Multiple transcript variants have been observe…	GO:0006351 (transcription, DNA-templated), GO:0006355 (regulation of transcription, DNA-templated), GO:0006396 (RNA processing), GO:0006397 (mRNA processing), GO:0008380 (RNA splicing), GO:0005654 (nucleoplasm), GO:0005815 (microtubule organizing center), GO:0015630 (microtubule cytoskeleton), GO:0016607 (nuclear speck), GO:0003723 (RNA binding), GO:0005515 (protein binding)			0.626503	0.748844		-0.607279	-0.350909	-0.417159				697.947	92.062	41.0221	-1.15636	7.48852	138.518	1.26144e-06	0.000382663	5.14261e-23	4.8601e-23	0.2	0.354767	0.0151215	-0.866025	-0.990488	0.0576689	0.00111197		256.582	279.466	107.949	129.331	123.437
ENSG00000128708	HAT1	PC	histone acetyltransferase 1	The protein encoded by this gene is a type B histone acetyltransferase (HAT) that is involved in the rapid acetylation of newly synthesized cytoplasmic histones, which are in turn imported into the nucleus for de novo deposition onto nascent DNA chains. Histone acetylation, particularly of histone H4, plays an important role in replication-dependent chromatin assembly. Specifically, this HAT can …	hsa05034 (Alcoholism), GO:0006323 (DNA packaging), GO:0006335 (DNA replication-dependent nucleosome assembly), GO:0006336 (DNA replication-independent nucleosome assembly), GO:0006348 (chromatin silencing at telomere), GO:0006475 (internal protein amino acid acetylation), GO:0007584 (response to nutrient), GO:0043967 (histone H4 acetylation), GO:0000784 (nuclear chromosome, telomeric region), GO:…			1.06034	0.652208		-0.649214	-0.581479	-0.481853				696.755	89.7028	77.3254	-1.46113	7.1684	138.145	1.27547e-06	0.000382663	5.90314e-25	5.08735e-25	0.2	0.354767	0.13701	-0.866025	-0.960255	0.0576689	0.00945487		265.366	199.487	79.7484	83.6781	89.8037
ENSG00000133112	TPT1	PC	tumor protein, translationally-controlled 1		GO:0006816 (calcium ion transport), GO:0006874 (cellular calcium ion homeostasis), GO:0009615 (response to virus), GO:0030154 (cell differentiation), GO:0042981 (regulation of apoptotic process), GO:0043066 (negative regulation of apoptotic process), GO:1902230 (negative regulation of intrinsic apoptotic signaling pathway in response to DNA damage), GO:0005615 (extracellular space), GO:0005634 (n…			0.547336	0.539825		-0.429722	-0.317219	-0.34022				695.899	99.5316	50.5877	-0.906216	10.7393	137.877	1.28566e-06	0.000382663	7.20262e-20	7.16707e-20	0.2	0.354767	0.000465753	-0.866025	-0.99816	0.0576689	9.47389e-05		2379.62	2367.26	1207.9	1306.02	1285.34
ENSG00000176731	C8orf59	PC	chromosome 8 open reading frame 59					0.980809	0.623748		-0.46361	-0.610717	-0.53023				694.32	85.8104	7.07836	-1.37385	6.71125	137.383	1.30471e-06	0.000382663	7.14562e-24	6.04886e-24	0.2	0.354767	0.1248	-0.866025	-0.96655	0.0576689	0.00730706		186.195	144.934	67.1505	60.447	64.0299
ENSG00000183527	PSMG1	PC	proteasome assembly chaperone 1		GO:0021930 (cerebellar granule cell precursor proliferation), GO:0043248 (proteasome assembly), GO:0080129 (proteasome core complex assembly), GO:0005634 (nucleus), GO:0005654 (nucleoplasm), GO:0005737 (cytoplasm), GO:0005783 (endoplasmic reticulum), GO:0005794 (Golgi apparatus), GO:0005829 (cytosol), GO:0005515 (protein binding), GO:0070628 (proteasome binding)			0.558225	0.549367		-0.437142	-0.344795	-0.325655				689.185	90.8781	30.2215	-0.933682	7.32281	135.784	1.36887e-06	0.000382663	5.35793e-20	5.35948e-20	0.2	0.354767	0.000372223	-0.866025	-0.998231	0.0576689	8.92706e-05		224.567	223.18	111.648	119.16	120.778
ENSG00000114686	MRPL3	PC	mitochondrial ribosomal protein L3	Mammalian mitochondrial ribosomal proteins are encoded by nuclear genes and help in protein synthesis within the mitochondrion. Mitochondrial ribosomes (mitoribosomes) consist of a small 28S subunit and a large 39S subunit. They have an estimated 75% protein to rRNA composition compared to prokaryotic ribosomes, where this ratio is reversed. Another difference between mammalian mitoribosomes and …	hsa03010 (Ribosome), GO:0006412 (translation), GO:0070125 (mitochondrial translational elongation), GO:0070126 (mitochondrial translational termination), GO:0005743 (mitochondrial inner membrane), GO:0005762 (mitochondrial large ribosomal subunit), GO:0003723 (RNA binding), GO:0003735 (structural constituent of ribosome), R-HSA-1852241 (Homo sapiens: Organelle biogenesis and maintenance), R-HSA-5…			0.561557	0.568988		-0.393984	-0.354089	-0.382472				682.297	81.126	18.552	-0.966171	6.28824	133.65	1.46062e-06	0.000390008	4.80955e-19	4.85187e-19	0.2	0.354767	3.13723e-06	-0.866025	-0.999776	0.0576689	4.02266e-06		109.914	110.492	55.7083	57.3264	56.1706
ENSG00000164609	SLU7	PC	SLU7 homolog, splicing factor	Pre-mRNA splicing occurs in two sequential transesterification steps. The protein encoded by this gene is a splicing factor that has been found to be essential during the second catalytic step in the pre-mRNA splicing process. It associates with the spliceosome and contains a zinc knuckle motif that is found in other splicing factors and is involved in protein-nucleic acid and protein-protein int…	hsa03040 (Spliceosome), GO:0000375 (RNA splicing, via transesterification reactions), GO:0000380 (alternative mRNA splicing, via spliceosome), GO:0000389 (mRNA 3'-splice site recognition), GO:0000398 (mRNA splicing, via spliceosome), GO:0006369 (termination of RNA polymerase II transcription), GO:0006405 (RNA export from nucleus), GO:0006406 (mRNA export from nucleus), GO:0006886 (intracellular p…			0.867169	1.00501		-0.693313	-0.677598	-0.501269				681.006	48.2157	22.4957	-1.75328	4.16677	133.252	1.47857e-06	0.000390008	1.69514e-20	2.14982e-20	0.2	0.354767	0.0304954	-0.866025	-0.994446	0.0576689	0.000496407		29.1255	32.2461	8.55273	8.66831	10.0552
ENSG00000132561	MATN2	PC	matrilin 2	This gene encodes a member of the von Willebrand factor A domain containing protein family. This family of proteins is thought to be involved in the formation of filamentous networks in the extracellular matrices of various tissues. This protein contains five von Willebrand factor A domains. The specific function of this gene has not yet been determined. Two transcript variants encoding different…	GO:0001764 (neuron migration), GO:0007411 (axon guidance), GO:0008150 (biological_process), GO:0008347 (glial cell migration), GO:0031104 (dendrite regeneration), GO:0048678 (response to axon injury), GO:0005578 (proteinaceous extracellular matrix), GO:0005604 (basement membrane), GO:0005615 (extracellular space), GO:0031012 (extracellular matrix), GO:0003674 (molecular_function), GO:0005509 (cal…			0.519858	0.630098		-0.352079	-0.348905	-0.448973				679.856	89.3195	60.4089	-0.972338	7.12725	132.897	1.49479e-06	0.000390008	4.93568e-20	4.89373e-20	0.2	0.354767	0.0342547	-0.866025	-0.993486	0.0576689	0.000630553		190.125	205.381	102.979	103.211	96.1604
ENSG00000144744	UBA3	PC	ubiquitin like modifier activating enzyme 3	The modification of proteins with ubiquitin is an important cellular mechanism for targeting abnormal or short-lived proteins for degradation. Ubiquitination involves at least three classes of enzymes: ubiquitin-activating enzymes, or E1s, ubiquitin-conjugating enzymes, or E2s, and ubiquitin-protein ligases, or E3s. This gene encodes a member of the E1 ubiquitin-activating enzyme family. The enco…	hsa04120 (Ubiquitin mediated proteolysis), GO:0006464 (cellular protein modification process), GO:0006508 (proteolysis), GO:0007113 (endomitotic cell cycle), GO:0038061 (NIK/NF-kappaB signaling), GO:0045116 (protein neddylation), GO:0045892 (negative regulation of transcription, DNA-templated), GO:0051726 (regulation of cell cycle), GO:0005634 (nucleus), GO:0005829 (cytosol), GO:0005515 (protein …			0.772178	0.546661		-0.469745	-0.466926	-0.382167				675.867	82.8294	24.7189	-1.12884	6.43151	131.671	1.5526e-06	0.000391268	7.47415e-21	6.95912e-21	0.2	0.354767	0.0883842	-0.866025	-0.981979	0.0576689	0.00289612		137.768	117.542	57.0952	57.2108	60.7937
ENSG00000198856	OSTC	PC	oligosaccharyltransferase complex non-catalytic subunit		GO:0018279 (protein N-linked glycosylation via asparagine), GO:0008250 (oligosaccharyltransferase complex), GO:0016021 (integral component of membrane), GO:0004579 (dolichyl-diphosphooligosaccharide-protein glycotransferase activity), GO:0005515 (protein binding)			0.551407	0.626077		-0.380048	-0.370116	-0.42732				673.539	78.3153	10.4174	-1.01079	6.07478	130.957	1.58751e-06	0.000391268	5.45452e-19	5.40921e-19	0.2	0.354767	0.0251583	-0.866025	-0.997331	0.0576689	0.000165452		93.7333	98.8187	48.1958	48.5425	46.5777
ENSG00000020426	MNAT1	PC	MNAT1, CDK activating kinase assembly factor	The protein encoded by this gene, along with cyclin H and CDK7, forms the CDK-activating kinase (CAK) enzymatic complex. This complex activates several cyclin-associated kinases and can also associate with TFIIH to activate transcription by RNA polymerase II. Two transcript variants encoding different isoforms have been found for this gene. [provided by RefSeq, Sep 2011].	hsa03022 (Basal transcription factors), hsa03420 (Nucleotide excision repair), GO:0000079 (regulation of cyclin-dependent protein serine/threonine kinase activity), GO:0000082 (G1/S transition of mitotic cell cycle), GO:0000086 (G2/M transition of mitotic cell cycle), GO:0006281 (DNA repair), GO:0006283 (transcription-coupled nucleotide-excision repair), GO:0006294 (nucleotide-excision repair, pr…			0.63324	0.794179		-0.403663	-0.553058	-0.470698				670.301	68.5376	18.8671	-1.24867	5.40026	129.966	1.63755e-06	0.000391268	5.09664e-20	5.72667e-20	0.2	0.354767	0.0513427	-0.866025	-0.990583	0.0576689	0.00109541		60.6781	68.0751	28.5476	25.5426	27.1607
ENSG00000198695	MT-ND6	PC	mitochondrially encoded NADH:ubiquinone oxidoreductase core subunit 6		hsa00190 (Oxidative phosphorylation), hsa01100 (Metabolic pathways), hsa04714 (Thermogenesis), hsa04723 (Retrograde endocannabinoid signaling), hsa05012 (Parkinson disease), R-HSA-1428517 (Homo sapiens: The citric acid (TCA) cycle and respiratory electron transport), R-HSA-1430728 (Homo sapiens: Metabolism), R-HSA-163200 (Homo sapiens: Respiratory electron transport, ATP synthesis by chemiosmotic…			0.772898	0.593613		-0.489995	-0.314078	-0.562438				669.07	99.6593	4.4293	-1.13883	11.0413	129.591	1.65705e-06	0.000391268	2.76476e-21	2.76485e-21	0.2	0.354767	0.04477	-0.866025	-0.984892	0.0576689	0.00222412		3328.05	2938.9	1385.66	1565.61	1317.7
ENSG00000103769	RAB11A	PC	RAB11A, member RAS oncogene family	The protein encoded by this gene belongs to the Rab family of the small GTPase superfamily. It is associated with both constitutive and regulated secretory pathways, and may be involved in protein transport. Two transcript variants encoding different isoforms have been found for this gene. [provided by RefSeq, May 2011].	hsa04144 (Endocytosis), hsa04961 (Endocrine and other factor-regulated calcium reabsorption), hsa04962 (Vasopressin-regulated water reabsorption), hsa04972 (Pancreatic secretion), GO:0000910 (cytokinesis), GO:0003091 (renal water homeostasis), GO:0007080 (mitotic metaphase plate congression), GO:0010634 (positive regulation of epithelial cell migration), GO:0010796 (regulation of multivesicular b…			0.49154	0.565275		-0.33871	-0.350716	-0.367389				668.232	89.8475	35.8433	-0.893114	7.18957	129.335	1.67047e-06	0.000391268	1.00522e-18	1.01876e-18	0.2	0.354767	0.0330465	-0.866025	-0.99729	0.0576689	0.000169285		196.366	206.768	109.567	108.643	107.371
ENSG00000128606	LRRC17	PC	leucine rich repeat containing 17		GO:0045671 (negative regulation of osteoclast differentiation), GO:0048539 (bone marrow development), GO:0005615 (extracellular space)			0.856852	0.670087		-0.610006	-0.376106	-0.540827				665.875	70.5051	38.0664	-1.33008	5.51629	128.617	1.70889e-06	0.000391268	4.70711e-21	5.27375e-21	0.2	0.354767	0.0500608	-0.866025	-0.987141	0.0576689	0.00174699		76.0499	66.5726	26.2361	31.2059	27.623
ENSG00000000419	DPM1	PC	dolichyl-phosphate mannosyltransferase subunit 1, catalytic	Dolichol-phosphate mannose (Dol-P-Man) serves as a donor of mannosyl residues on the lumenal side of the endoplasmic reticulum (ER). Lack of Dol-P-Man results in defective surface expression of GPI-anchored proteins. Dol-P-Man is synthesized from GDP-mannose and dolichol-phosphate on the cytosolic side of the ER by the enzyme dolichyl-phosphate mannosyltransferase. Human DPM1 lacks a carboxy-term…	hsa00510 (N-Glycan biosynthesis), hsa01100 (Metabolic pathways), GO:0006506 (GPI anchor biosynthetic process), GO:0018279 (protein N-linked glycosylation via asparagine), GO:0019348 (dolichol metabolic process), GO:0035268 (protein mannosylation), GO:0035269 (protein O-linked mannosylation), GO:0005634 (nucleus), GO:0005783 (endoplasmic reticulum), GO:0005789 (endoplasmic reticulum membrane), GO:…			0.576359	0.641833		-0.484323	-0.420361	-0.313508				664.432	81.867	22.598	-1.03882	6.35209	128.179	1.7329e-06	0.000391268	9.97749e-20	9.70059e-20	0.2	0.354767	0.00237655	-0.866025	-0.995439	0.0576689	0.000369569		115	120.432	54.0902	56.6329	61.1405
ENSG00000161202	DVL3	PC	dishevelled segment polarity protein 3	This gene is a member of a multi-gene family which shares strong similarity with the Drosophila dishevelled gene, dsh. The Drosophila dishevelled gene encodes a cytoplasmic phosphoprotein that regulates cell proliferation. [provided by RefSeq, Jul 2008]. Publication Note: This RefSeq record includes a subset of the publications that are available for this gene. Please see the Gene record to acces…	hsa04150 (mTOR signaling pathway), hsa04310 (Wnt signaling pathway), hsa04330 (Notch signaling pathway), hsa04390 (Hippo signaling pathway), hsa04550 (Signaling pathways regulating pluripotency of stem cells), hsa04916 (Melanogenesis), hsa04934 (Cushing syndrome), hsa05165 (Human papillomavirus infection), hsa05200 (Pathways in cancer), hsa05217 (Basal cell carcinoma), hsa05224 (Breast cancer), h…			0.721063	0.835425		-0.685719	-0.353628	-0.517141				660.968	74.2526	60.3748	-1.34118	5.77324	127.129	1.79212e-06	0.000393865	7.01052e-22	7.76678e-22	0.2	0.354767	0.00728394	-0.866025	-0.991146	0.0576689	0.000998702		82.06	88.9946	29.7034	37.9094	33.633
ENSG00000188739	RBM34	PC	RNA binding motif protein 34		GO:0005634 (nucleus), GO:0005730 (nucleolus), GO:0003723 (RNA binding)			0.539084	0.639539		-0.424948	-0.3633	-0.390375				659.097	77.8298	16.2947	-1.0128	6.04428	126.563	1.82505e-06	0.000393865	1.45103e-18	1.44009e-18	0.2	0.354767	0.038854	-0.866025	-0.995495	0.0576689	0.000362702		90.9594	97.6629	45.6531	47.7335	46.8089
ENSG00000070087	PFN2	PC	profilin 2	The protein encoded by this gene is a ubiquitous actin monomer-binding protein belonging to the profilin family. It is thought to regulate actin polymerization in response to extracellular signals. There are two alternatively spliced transcript variants encoding different isoforms described for this gene. [provided by RefSeq, Jul 2008].	hsa04015 (Rap1 signaling pathway), hsa04810 (Regulation of actin cytoskeleton), hsa05131 (Shigellosis), hsa05132 (Salmonella infection), GO:0010633 (negative regulation of epithelial cell migration), GO:0030036 (actin cytoskeleton organization), GO:0030837 (negative regulation of actin filament polymerization), GO:0030838 (positive regulation of actin filament polymerization), GO:0032233 (positiv…			0.619517	0.917155		-0.526552	-0.381223	-0.628896				657.98	86.5855	19.8211	-1.30863	6.79742	126.225	1.84504e-06	0.000393865	2.94674e-22	2.6208e-22	0.2	0.354767	0.0989887	-0.866025	-0.972774	0.0576689	0.00537063		154.874	190.818	68.8841	76.3967	64.0299
ENSG00000100519	PSMC6	PC	proteasome 26S subunit, ATPase 6	The 26S proteasome is a multicatalytic proteinase complex with a highly ordered structure composed of 2 complexes, a 20S core and a 19S regulator. The 20S core is composed of 4 rings of 28 non-identical subunits; 2 rings are composed of 7 alpha subunits and 2 rings are composed of 7 beta subunits. The 19S regulator is composed of a base, which contains 6 ATPase subunits and 2 non-ATPase subunits,…	hsa03050 (Proteasome), hsa05169 (Epstein-Barr virus infection), GO:0000165 (MAPK cascade), GO:0000209 (protein polyubiquitination), GO:0002223 (stimulatory C-type lectin receptor signaling pathway), GO:0002479 (antigen processing and presentation of exogenous peptide antigen via MHC class I, TAP-dependent), GO:0006511 (ubiquitin-dependent protein catabolic process), GO:0006521 (regulation of cell…			0.638825	0.66243		-0.516293	-0.484838	-0.300125				655.389	79.2777	24.2249	-1.11231	6.1429	125.444	1.89237e-06	0.000396756	4.07248e-20	3.81673e-20	0.2	0.354767	0.000667262	-0.866025	-0.995267	0.0576689	0.000390612		103.095	104.829	45.1908	46.231	52.8189
ENSG00000198056	PRIM1	PC	DNA primase subunit 1	The replication of DNA in eukaryotic cells is carried out by a complex chromosomal replication apparatus, in which DNA polymerase alpha and primase are two key enzymatic components. Primase, which is a heterodimer of a small subunit and a large subunit, synthesizes small RNA primers for the Okazaki fragments made during discontinuous DNA replication. The protein encoded by this gene is the small,…	hsa01100 (Metabolic pathways), hsa03030 (DNA replication), GO:0000082 (G1/S transition of mitotic cell cycle), GO:0000722 (telomere maintenance via recombination), GO:0006269 (DNA replication, synthesis of RNA primer), GO:0006270 (DNA replication initiation), GO:0005654 (nucleoplasm), GO:0005658 (alpha DNA polymerase:primase complex), GO:0016020 (membrane), GO:0003697 (single-stranded DNA binding…			0.590757	0.81916		-0.521302	-0.457244	-0.431371				651.531	70.6158	17.3509	-1.23186	5.52065	124.285	1.96542e-06	0.000404843	2.17782e-19	2.41829e-19	0.2	0.354767	0.0866329	-0.866025	-0.983221	0.0576689	0.00260256		64.0299	75.3565	28.5476	29.9346	30.5124
ENSG00000183291	SELENOF	PC	selenoprotein F	This gene encodes a selenoprotein, which contains a selenocysteine (Sec) residue at its active site. The selenocysteine is encoded by the UGA codon that normally signals translation termination. The 3_ UTR of selenoprotein genes have a common stem-loop structure, the sec insertion sequence (SECIS), that is necessary for the recognition of UGA as a Sec codon rather than as a stop signal. Studies i…	GO:0051084 ('de novo' posttranslational protein folding), GO:0005788 (endoplasmic reticulum lumen), GO:0070062 (extracellular vesicular exosome)			0.653021	1.16792		-0.638174	-0.532836	-0.64993				649.635	90.3501	31.5162	-1.56117	7.25019	123.716	2.00249e-06	0.000405312	1.46795e-23	1.29108e-23	0.2	0.354767	0.166603	-0.866025	-0.944189	0.0576689	0.0156945		207.115	296.803	83.4469	89.9192	82.7534
ENSG00000141279	NPEPPS	PC	aminopeptidase puromycin sensitive	This gene encodes the puromycin-sensitive aminopeptidase, a zinc metallopeptidase which hydrolyzes amino acids from the N-terminus of its substrate. The protein has been localized to both the cytoplasm and to cellular membranes. This enzyme degrades enkaphalins in the brain, and studies in mouse suggest that it is involved in proteolytic events regulating the cell cycle. [provided by RefSeq, Jul …	GO:0000209 (protein polyubiquitination), GO:0006508 (proteolysis), GO:0043171 (peptide catabolic process), GO:0071456 (cellular response to hypoxia), GO:1903955 (NA), GO:0005634 (nucleus), GO:0005737 (cytoplasm), GO:0005829 (cytosol), GO:0070062 (extracellular vesicular exosome), GO:0004177 (aminopeptidase activity), GO:0008270 (zinc ion binding), GO:0042277 (peptide binding), GO:0070006 (metallo…			0.799198	0.52461		-0.502795	-0.385143	-0.43587				647.918	89.2854	38.2112	-1.12504	7.12414	123.202	2.03675e-06	0.000405312	1.66529e-20	1.5903e-20	0.2	0.354767	0.107669	-0.866025	-0.973942	0.0576689	0.00502957		226.069	186.542	90.4971	98.3564	94.8891
ENSG00000198938	MT-CO3	PC	mitochondrially encoded cytochrome c oxidase III		hsa00190 (Oxidative phosphorylation), hsa01100 (Metabolic pathways), hsa04260 (Cardiac muscle contraction), hsa04714 (Thermogenesis), hsa04932 (Non-alcoholic fatty liver disease (NAFLD)), hsa05010 (Alzheimer disease), hsa05012 (Parkinson disease), hsa05016 (Huntington disease), R-HSA-1428517 (Homo sapiens: The citric acid (TCA) cycle and respiratory electron transport), R-HSA-1430728 (Homo sapien…			0.650094	0.593058		-0.482356	-0.298551	-0.462246				645.162	99.9574	12.8705	-1.03408	13.2146	122.379	2.09314e-06	0.000409592	3.63356e-18	3.63218e-18	0.2	0.354767	0.000678464	-0.866025	-0.994948	0.0576689	0.000430727		13987.8	13445.5	6379.3	7246.36	6468.87
ENSG00000109220	CHIC2	PC	cysteine rich hydrophobic domain 2	This gene encodes a member of the CHIC family of proteins. The encoded protein contains a cysteine-rich hydrophobic (CHIC) motif, and is localized to vesicular structures and the plasma membrane. This gene is associated with some cases of acute myeloid leukemia. [provided by RefSeq, Jul 2008].	GO:0006893 (Golgi to plasma membrane transport), GO:0008150 (biological_process), GO:0005575 (cellular_component), GO:0005798 (Golgi-associated vesicle), GO:0005886 (plasma membrane), GO:0003674 (molecular_function), GO:0005515 (protein binding)			0.749328	0.681238		-0.610452	-0.424912	-0.395202				641.658	66.8342	10.6814	-1.25273	5.27925	121.336	2.16739e-06	0.000413049	2.75916e-19	3.11697e-19	0.2	0.354767	0.00140601	-0.866025	-0.995388	0.0576689	0.000375735		60.6781	57.7887	22.422	25.7738	26.3517
ENSG00000081870	HSPB11	PC	heat shock protein family B (small) member 11		GO:0001501 (skeletal system development), GO:0007224 (smoothened signaling pathway), GO:0007507 (heart development), GO:0030324 (lung development), GO:0035735 (intraciliary transport involved in cilium morphogenesis), GO:0070986 (left/right axis specification), GO:0005813 (centrosome), GO:0005929 (cilium), GO:0030992 (intraciliary transport particle B), GO:0070062 (extracellular vesicular exosome…			0.851103	0.570443		-0.530976	-0.541915	-0.348654				641.023	89.6005	12.7002	-1.20573	7.15886	121.148	2.18116e-06	0.000413049	4.64511e-21	4.36098e-21	0.2	0.354767	0.0979801	-0.866025	-0.973243	0.0576689	0.0052329		237.28	194.979	89.8037	89.1102	102.17
ENSG00000130935	NOL11	PC	nucleolar protein 11		GO:0006351 (transcription, DNA-templated), GO:0006364 (rRNA processing), GO:0030490 (maturation of SSU-rRNA), GO:1901838 (positive regulation of transcription of nuclear large rRNA transcript from RNA polymerase I promoter), GO:0005654 (nucleoplasm), GO:0005730 (nucleolus), GO:0034455 (t-UTP complex), GO:0003723 (RNA binding), GO:0005515 (protein binding), R-HSA-6790901 (Homo sapiens: rRNA modifi…			0.553703	0.627679		-0.393488	-0.470227	-0.317668				638.049	79.7803	30.6985	-1.0108	6.18522	120.266	2.24701e-06	0.000414408	2.18785e-18	2.16867e-18	0.2	0.354767	0.00643288	-0.866025	-0.995355	0.0576689	0.000379702		101.246	106.678	51.5475	48.7737	54.437
ENSG00000239559	RPL37P2	p_Pg	ribosomal protein L37 pseudogene 2					0.814919	0.986801		-0.837791	-0.462961	-0.500968				637.521	63.3166	1.24361	-1.59176	5.05986	120.109	2.25893e-06	0.000414408	1.73524e-21	2.02282e-21	0.2	0.354767	0.0263127	-0.866025	-0.988388	0.0576689	0.00149942		51.8943	58.7133	15.1406	20.226	19.6482
ENSG00000175582	RAB6A	PC	RAB6A, member RAS oncogene family	This gene encodes a member of the RAB family, which belongs to the small GTPase superfamily. GTPases of the RAB family bind to various effectors to regulate the targeting and fusion of transport carriers to acceptor compartments. This protein is located at the Golgi apparatus, which regulates trafficking in both a retrograde (from early endosomes and Golgi to the endoplasmic reticulum) and an ant…	GO:0000042 (protein targeting to Golgi), GO:0006890 (retrograde vesicle-mediated transport, Golgi to ER), GO:0016032 (viral process), GO:0018125 (peptidyl-cysteine methylation), GO:0019882 (antigen processing and presentation), GO:0034067 (protein localization to Golgi apparatus), GO:0034498 (early endosome to Golgi transport), GO:0043312 (neutrophil degranulation), GO:0061024 (membrane organizat…			0.620502	0.625248		-0.347672	-0.347672	-0.550405				632.833	79.4481	45.7496	-1.06437	6.15465	116.359	2.56987e-06	0.000431155	9.55006e-19	9.23871e-19	0.138641	0.354767	0.00180242	-0.888523	-0.995282	0.043925	0.000388718		103.211	103.557	51.7787	51.7787	44.7285
ENSG00000180329	CCDC43	PC	coiled-coil domain containing 43		GO:0005515 (protein binding)			0.573663	0.705882		-0.387928	-0.499032	-0.392585				632.573	71.8252	54.9063	-1.11163	5.59911	118.648	2.37423e-06	0.000428859	4.05631e-18	4.46353e-18	0.2	0.354767	0.0427733	-0.866025	-0.992405	0.0576689	0.000793616		67.8439	74.5474	33.8642	31.2059	33.7486
ENSG00000169764	UGP2	PC	UDP-glucose pyrophosphorylase 2	The enzyme encoded by this gene is an important intermediary in mammalian carbohydrate interconversions. It transfers a glucose moiety from glucose-1-phosphate to MgUTP and forms UDP-glucose and MgPPi. In liver and muscle tissue, UDP-glucose is a direct precursor of glycogen; in lactating mammary gland it is converted to UDP-galactose which is then converted to lactose. The eukaryotic enzyme has …	hsa00040 (Pentose and glucuronate interconversions), hsa00052 (Galactose metabolism), hsa00500 (Starch and sucrose metabolism), hsa00520 (Amino sugar and nucleotide sugar metabolism), hsa01100 (Metabolic pathways), GO:0005977 (glycogen metabolic process), GO:0005978 (glycogen biosynthetic process), GO:0006011 (UDP-glucose metabolic process), GO:0006065 (UDP-glucuronate biosynthetic process), GO:0…			0.63023	0.810081		-0.508431	-0.568227	-0.363653				631.019	68.6739	22.7257	-1.25899	5.40657	118.191	2.41181e-06	0.000429047	4.53114e-19	5.06323e-19	0.2	0.354767	0.0514804	-0.866025	-0.987424	0.0576689	0.00168982		60.6781	68.9997	26.4672	25.3115	29.4722
ENSG00000176788	BASP1	PC	brain abundant membrane attached signal protein 1	This gene encodes a membrane bound protein with several transient phosphorylation sites and PEST motifs. Conservation of proteins with PEST sequences among different species supports their functional significance. PEST sequences typically occur in proteins with high turnover rates. Immunological characteristics of this protein are species specific. This protein also undergoes N-terminal myristoyl…	GO:0007356 (thorax and anterior abdomen determination), GO:0008406 (gonad development), GO:0021762 (substantia nigra development), GO:0045892 (negative regulation of transcription, DNA-templated), GO:0060231 (mesenchymal to epithelial transition), GO:0060421 (positive regulation of heart growth), GO:0060539 (diaphragm development), GO:0072075 (metanephric mesenchyme development), GO:0072112 (glom…			0.560914	0.506409		-0.369843	-0.271321	-0.426159				627.162	93.3311	44.4037	-0.896648	7.72061	117.059	2.50804e-06	0.000431155	5.34546e-18	5.37033e-18	0.2	0.354767	0.0010885	-0.866025	-0.995187	0.0576689	0.000400564		297.265	286.17	154.989	166.085	148.979
ENSG00000168542	COL3A1	PC	collagen type III alpha 1 chain	This gene encodes the pro-alpha1 chains of type III collagen, a fibrillar collagen that is found in extensible connective tissues such as skin, lung, uterus, intestine and the vascular system, frequently in association with type I collagen. Mutations in this gene are associated with Ehlers-Danlos syndrome types IV, and with aortic and arterial aneurysms. Two transcripts, resulting from the use of…	hsa04611 (Platelet activation), hsa04926 (Relaxin signaling pathway), hsa04933 (AGE-RAGE signaling pathway in diabetic complications), hsa04974 (Protein digestion and absorption), hsa05146 (Amoebiasis), GO:0001501 (skeletal system development), GO:0007160 (cell-matrix adhesion), GO:0007179 (transforming growth factor beta receptor signaling pathway), GO:0007229 (integrin-mediated signaling pathwa…			0.864591	0.867948		-0.602311	-0.759169	-0.37106				624.967	59.9438	76.1244	-1.54106	4.86421	116.416	2.56472e-06	0.000431155	2.86851e-20	3.37062e-20	0.2	0.354767	0.0021103	-0.866025	-0.994674	0.0576689	0.000466235		47.6179	47.7335	15.9497	14.1004	19.0703
ENSG00000136156	ITM2B	PC	integral membrane protein 2B	Amyloid precursor proteins are processed by beta-secretase and gamma-secretase to produce beta-amyloid peptides which form the characteristic plaques of Alzheimer disease. This gene encodes a transmembrane protein which is processed at the C-terminus by furin or furin-like proteases to produce a small secreted peptide which inhibits the deposition of beta-amyloid. Mutations which result in extens…	GO:0007399 (nervous system development), GO:0042985 (negative regulation of amyloid precursor protein biosynthetic process), GO:0044267 (cellular protein metabolic process), GO:0000139 (Golgi membrane), GO:0005576 (extracellular region), GO:0005615 (extracellular space), GO:0005794 (Golgi apparatus), GO:0005886 (plasma membrane), GO:0010008 (endosome membrane), GO:0016020 (membrane), GO:0030660 (…			0.500765	0.627816		-0.388993	-0.28738	-0.452208				624.744	91.6787	90.7496	-0.951125	7.43672	116.351	2.57055e-06	0.000431155	2.12722e-18	2.12159e-18	0.2	0.354767	0.0325694	-0.866025	-0.989803	0.0576689	0.00123423		232.773	254.386	124.708	133.954	119.276
ENSG00000114209	PDCD10	PC	programmed cell death 10	This gene encodes an evolutionarily conserved protein associated with cell apoptosis. The protein interacts with the serine/threonine protein kinase MST4 to modulate the extracellular signal-regulated kinase (ERK) pathway. It also interacts with and is phosphoryated by serine/threonine kinase 25, and is thought to function in a signaling pathway essential for vascular developent. Mutations in thi…	GO:0001525 (angiogenesis), GO:0008284 (positive regulation of cell proliferation), GO:0010628 (positive regulation of gene expression), GO:0010629 (negative regulation of gene expression), GO:0030335 (positive regulation of cell migration), GO:0032874 (positive regulation of stress-activated MAPK cascade), GO:0033138 (positive regulation of peptidyl-serine phosphorylation), GO:0036481 (intrinsic …			0.606464	1.03295		-0.563659	-0.462706	-0.613045				618.414	79.7036	15.954	-1.42075	6.17925	114.507	2.74282e-06	0.000449584	9.93327e-21	8.31259e-21	0.2	0.354767	0.146891	-0.866025	-0.955	0.0576689	0.0113814		98.472	133.03	42.6481	45.8842	41.1456
ENSG00000109180	OCIAD1	PC	OCIA domain containing 1		GO:0005739 (mitochondrion), GO:0005768 (endosome), GO:0016020 (membrane), GO:0005515 (protein binding)			0.479791	0.697314		-0.422199	-0.404034	-0.350872				617.913	87.0198	17.6491	-1.00191	6.84403	114.361	2.75701e-06	0.000449584	3.25342e-18	3.21807e-18	0.2	0.354767	0.093338	-0.866025	-0.980711	0.0576689	0.00320663		151.406	176.371	80.0952	81.1353	84.2559
ENSG00000128245	YWHAH	PC	tyrosine 3-monooxygenase/tryptophan 5-monooxygenase activation protein eta	This gene product belongs to the 14-3-3 family of proteins which mediate signal transduction by binding to phosphoserine-containing proteins. This highly conserved protein family is found in both plants and mammals, and this protein is 99% identical to the mouse, rat and bovine orthologs. This gene contains a 7 bp repeat sequence in its 5_ UTR, and changes in the number of this repeat have been a…	hsa04110 (Cell cycle), hsa04114 (Oocyte meiosis), hsa04151 (PI3K-Akt signaling pathway), hsa04390 (Hippo signaling pathway), hsa05160 (Hepatitis C), hsa05203 (Viral carcinogenesis), GO:0002028 (regulation of sodium ion transport), GO:0006713 (glucocorticoid catabolic process), GO:0006886 (intracellular protein transport), GO:0021762 (substantia nigra development), GO:0042921 (glucocorticoid recep…			0.521464	0.48562		-0.330857	-0.382578	-0.293648				612.235	88.5785	38.9949	-0.851532	7.04074	112.717	2.9237e-06	0.000470079	1.07913e-16	1.10727e-16	0.2	0.354767	0.000695574	-0.866025	-0.998067	0.0576689	0.000101996		181.688	177.18	99.7433	96.1604	102.402
ENSG00000168906	MAT2A	PC	methionine adenosyltransferase 2A	The protein encoded by this gene catalyzes the production of S-adenosylmethionine (AdoMet) from methionine and ATP. AdoMet is the key methyl donor in cellular processes. [provided by RefSeq, Jun 2011]. Sequence Note: This RefSeq record was created from transcript and genomic sequence data to make the sequence consistent with the reference genome assembly. The genomic coordinates used for the tran…	hsa00270 (Cysteine and methionine metabolism), hsa01100 (Metabolic pathways), hsa01230 (Biosynthesis of amino acids), GO:0006556 (S-adenosylmethionine biosynthetic process), GO:0006730 (one-carbon metabolic process), GO:0032259 (methylation), GO:0034214 (protein hexamerization), GO:0051291 (protein heterooligomerization), GO:0005829 (cytosol), GO:0048269 (methionine adenosyltransferase complex), …			0.477598	0.561754		-0.309449	-0.387303	-0.342601				609.378	85.6315	44.77	-0.883007	6.69654	111.894	3.01186e-06	0.000470079	1.11723e-16	1.14801e-16	0.2	0.354767	0.0278277	-0.866025	-0.995654	0.0576689	0.00034366		138.462	146.899	79.4017	75.1253	77.5524
ENSG00000111237	VPS29	PC	VPS29, retromer complex component	This gene belongs to a group of vacuolar protein sorting (VPS) genes that, when functionally impaired, disrupt the efficient delivery of vacuolar hydrolases. The protein encoded by this gene is a component of a large multimeric complex, termed the retromer complex, which is involved in retrograde transport of proteins from endosomes to the trans-Golgi network. This VPS protein may be involved in …	hsa04144 (Endocytosis), GO:0015031 (protein transport), GO:0016055 (Wnt signaling pathway), GO:0042147 (retrograde transport, endosome to Golgi), GO:1990126 (retrograde transport, endosome to plasma membrane), GO:0005768 (endosome), GO:0005769 (early endosome), GO:0005770 (late endosome), GO:0005829 (cytosol), GO:0010008 (endosome membrane), GO:0030904 (retromer complex), GO:0030906 (retromer com…			0.480021	0.504014		-0.316961	-0.293953	-0.373121				607.703	89.9753	18.5009	-0.830721	7.20321	111.412	3.06494e-06	0.000470079	2.00313e-16	2.05511e-16	0.2	0.354767	8.17722e-05	-0.866025	-0.998574	0.0576689	6.46188e-05		197.869	201.22	113.035	114.884	108.643
ENSG00000128989	ARPP19	PC	cAMP regulated phosphoprotein 19	The 19-kD cAMP-regulated phosphoprotein plays a role in regulating mitosis by inhibiting protein phosphatase-2A (PP2A; see MIM 176915) (summary by Gharbi-Ayachi et al., 2010 [PubMed 21164014]).[supplied by OMIM, Feb 2011].	GO:0000086 (G2/M transition of mitotic cell cycle), GO:0007067 (mitotic nuclear division), GO:0035308 (negative regulation of protein dephosphorylation), GO:0043086 (negative regulation of catalytic activity), GO:0045722 (positive regulation of gluconeogenesis), GO:0046326 (positive regulation of glucose import), GO:0051301 (cell division), GO:0005654 (nucleoplasm), GO:0005737 (cytoplasm), GO:000…			0.673798	0.696365		-0.298484	-0.509539	-0.56214				606.248	71.5612	59.2589	-1.18588	5.5832	110.995	3.11192e-06	0.000470079	1.98876e-18	2.19277e-18	0.2	0.354767	0.00112133	-0.866025	-0.994222	0.0576689	0.000526832		71.3113	72.467	35.3667	30.2813	29.1255
ENSG00000116750	UCHL5	PC	ubiquitin C-terminal hydrolase L5		GO:0006281 (DNA repair), GO:0006310 (DNA recombination), GO:0006351 (transcription, DNA-templated), GO:0006355 (regulation of transcription, DNA-templated), GO:0006511 (ubiquitin-dependent protein catabolic process), GO:0010951 (negative regulation of endopeptidase activity), GO:0016579 (protein deubiquitination), GO:0021670 (lateral ventricle development), GO:0030901 (midbrain development), GO:0…			0.673398	1.07436		-0.638939	-0.591102	-0.517715				605.781	59.4157	47.5809	-1.58057	4.84229	110.861	3.12718e-06	0.000470079	1.31158e-18	1.52336e-18	0.2	0.354767	0.134249	-0.866025	-0.962783	0.0576689	0.00857058		40.5677	54.2058	15.1406	15.7185	16.6431
ENSG00000172239	PAIP1	PC	poly(A) binding protein interacting protein 1	The protein encoded by this gene interacts with poly(A)-binding protein and with the cap-binding complex eIF4A. It is involved in translational initiation and protein biosynthesis. Overexpression of this gene in COS7 cells stimulates translation. Alternative splicing occurs at this locus and three transcript variants encoding three distinct isoforms have been identified. [provided by RefSeq, Jul …	hsa03013 (RNA transport), GO:0000289 (nuclear-transcribed mRNA poly(A) tail shortening), GO:0006413 (translational initiation), GO:0045727 (positive regulation of translation), GO:0048255 (mRNA stabilization), GO:0005737 (cytoplasm), GO:0005829 (cytosol), GO:0003723 (RNA binding), GO:0005515 (protein binding), GO:0008494 (translation activator activity), R-HSA-429914 (Homo sapiens: Deadenylation-…			0.923371	0.627057		-0.336432	-0.603692	-0.610305				604.993	82.2758	41.9932	-1.32618	6.38239	110.635	3.15313e-06	0.000470079	3.61179e-20	3.19463e-20	0.2	0.354767	0.091872	-0.866025	-0.971469	0.0576689	0.00576028		143.663	116.618	58.8289	48.5425	48.3114
ENSG00000163918	RFC4	PC	replication factor C subunit 4	The elongation of primed DNA templates by DNA polymerase delta and DNA polymerase epsilon requires the accessory proteins proliferating cell nuclear antigen (PCNA) and replication factor C (RFC). RFC, also named activator 1, is a protein complex consisting of five distinct subunits of 140, 40, 38, 37, and 36 kD. This gene encodes the 37 kD subunit. This subunit forms a core complex with the 36 an…	hsa03030 (DNA replication), hsa03420 (Nucleotide excision repair), hsa03430 (Mismatch repair), GO:0000722 (telomere maintenance via recombination), GO:0006260 (DNA replication), GO:0006271 (DNA strand elongation involved in DNA replication), GO:0006283 (transcription-coupled nucleotide-excision repair), GO:0006296 (nucleotide-excision repair, DNA incision, 5'-to lesion), GO:0006297 (nucleotide-ex…			0.537039	0.53075		-0.442219	-0.354788	-0.270783				603.647	88.6722	15.2555	-0.901466	7.05133	110.249	3.19796e-06	0.000470079	3.99729e-17	4.05068e-17	0.2	0.354767	0.00142653	-0.866025	-0.99595	0.0576689	0.000309251		183.999	183.19	92.3464	98.2408	104.251
ENSG00000215030	RPL13P12	p_Pg	ribosomal protein L13 pseudogene 12					0.698568	0.667037		-0.461409	-0.371354	-0.532842				602.52	60.8807	7.63203	-1.21389	4.91925	109.927	3.23609e-06	0.000470079	1.04706e-16	1.19706e-16	0.2	0.354767	8.52609e-05	-0.866025	-0.997837	0.0576689	0.000120727		46.1154	45.0752	19.5326	20.9195	18.4924
ENSG00000120697	ALG5	PC	ALG5, dolichyl-phosphate beta-glucosyltransferase	This gene encodes a member of the glycosyltransferase 2 family. The encoded protein participates in glucosylation of the oligomannose core in N-linked glycosylation of proteins. The addition of glucose residues to the oligomannose core is necessary to ensure substrate recognition, and therefore, effectual transfer of the oligomannose core to the nascent glycoproteins. Multiple transcript variants…	hsa00510 (N-Glycan biosynthesis), hsa01100 (Metabolic pathways), GO:0006486 (protein glycosylation), GO:0006487 (protein N-linked glycosylation), GO:0007368 (determination of left/right symmetry), GO:0018279 (protein N-linked glycosylation via asparagine), GO:0005789 (endoplasmic reticulum membrane), GO:0016020 (membrane), GO:0016021 (integral component of membrane), GO:0004576 (oligosaccharyl tr…			0.604595	0.503029		-0.330121	-0.441858	-0.335646				601.642	81.1515	15.9455	-0.946596	6.28994	109.676	3.26613e-06	0.000470079	8.68314e-17	8.83796e-17	0.2	0.354767	0.0265317	-0.866025	-0.993517	0.0576689	0.000626016		113.613	105.753	58.4822	53.9747	58.251
ENSG00000143933	CALM2	PC	calmodulin 2		hsa04014 (Ras signaling pathway), hsa04015 (Rap1 signaling pathway), hsa04020 (Calcium signaling pathway), hsa04022 (cGMP-PKG signaling pathway), hsa04024 (cAMP signaling pathway), hsa04070 (Phosphatidylinositol signaling system), hsa04114 (Oocyte meiosis), hsa04218 (Cellular senescence), hsa04261 (Adrenergic signaling in cardiomyocytes), hsa04270 (Vascular smooth muscle contraction), hsa04371 (A…			0.568921	0.417387		-0.343467	-0.32569	-0.31715				600.823	98.5947	47.598	-0.82588	9.66406	109.442	3.29447e-06	0.000470079	1.31434e-16	1.31067e-16	0.2	0.354767	0.0755532	-0.866025	-0.987979	0.0576689	0.0015793		1156.01	1040.54	613.254	620.882	624.58
ENSG00000111011	RSRC2	PC	arginine and serine rich coiled-coil 2		GO:0003723 (RNA binding)			0.607721	0.476316		-0.369451	-0.386217	-0.32837				599.209	81.4326	39.7274	-0.927333	6.31571	108.982	3.35108e-06	0.000470079	1.89415e-16	1.94009e-16	0.2	0.354767	0.0575704	-0.866025	-0.991681	0.0576689	0.000909623		116.155	105.869	58.0199	57.3264	59.7535
ENSG00000255717	SNHG1	processed_transcript	small nucleolar RNA host gene 1					0.555146	0.427677		-0.348472	-0.337704	-0.296647				598.869	96.3036	15.1874	-0.824949	8.43411	108.885	3.36314e-06	0.000470079	1.7329e-16	1.74154e-16	0.2	0.354767	0.0600303	-0.866025	-0.990971	0.0576689	0.00102841		488.661	447.169	260.28	262.245	269.873
ENSG00000023734	STRAP	PC	serine/threonine kinase receptor associated protein		hsa03013 (RNA transport), GO:0000122 (negative regulation of transcription from RNA polymerase II promoter), GO:0000387 (spliceosomal snRNP assembly), GO:0010633 (negative regulation of epithelial cell migration), GO:0010719 (negative regulation of epithelial to mesenchymal transition), GO:0030277 (maintenance of gastrointestinal epithelium), GO:0030512 (negative regulation of transforming growth…			0.543674	0.460797		-0.401081	-0.31237	-0.29102				595.264	92.0194	32.0954	-0.846149	7.48312	107.861	3.49418e-06	0.000481182	2e-16	2.03154e-16	0.2	0.354767	0.0172023	-0.866025	-0.99434	0.0576689	0.000510787		250.572	236.471	129.216	137.537	139.618
ENSG00000006625	GGCT	PC	gamma-glutamylcyclotransferase	The protein encoded by this gene catalyzes the formation of 5-oxoproline from gamma-glutamyl dipeptides, the penultimate step in glutathione catabolism, and may play a critical role in glutathione homeostasis. The encoded protein may also play a role in cell proliferation, and the expression of this gene is a potential marker for cancer. Pseudogenes of this gene are located on the long arm of chr…	hsa00480 (Glutathione metabolism), hsa01100 (Metabolic pathways), GO:0001836 (release of cytochrome c from mitochondria), GO:0006750 (glutathione biosynthetic process), GO:0005829 (cytosol), GO:0070062 (extracellular vesicular exosome), GO:0003839 (gamma-glutamylcyclotransferase activity), GO:0042803 (protein homodimerization activity), R-HSA-1430728 (Homo sapiens: Metabolism), R-HSA-156580 (Homo…			0.701283	0.570392		-0.456943	-0.438027	-0.376705				594.451	65.6673	19.7871	-1.11948	5.20163	107.63	3.52454e-06	0.000481182	3.0292e-16	3.38558e-16	0.2	0.354767	0.0487022	-0.866025	-0.993148	0.0576689	0.0006801		56.6329	51.5475	24.2713	24.618	25.7738
ENSG00000174021	GNG5	PC	G protein subunit gamma 5	G proteins are trimeric (alpha-beta-gamma) membrane-associated proteins that regulate flow of information from cell surface receptors to a variety of internal metabolic effectors. Interaction of a G protein with its activated receptor promotes exchange of GTP for GDP that is bound to the alpha subunit. The alpha-GTP complex dissociates from the beta-gamma heterodimer so that the subunits, in turn…	hsa04014 (Ras signaling pathway), hsa04062 (Chemokine signaling pathway), hsa04151 (PI3K-Akt signaling pathway), hsa04371 (Apelin signaling pathway), hsa04713 (Circadian entrainment), hsa04723 (Retrograde endocannabinoid signaling), hsa04724 (Glutamatergic synapse), hsa04725 (Cholinergic synapse), hsa04726 (Serotonergic synapse), hsa04727 (GABAergic synapse), hsa04728 (Dopaminergic synapse), hsa0…			0.460616	0.682516		-0.457352	-0.312529	-0.373251				592.04	96.7464	11.6354	-0.960665	8.57431	106.947	3.61629e-06	0.000482475	1.19837e-17	1.19257e-17	0.2	0.354767	0.0899878	-0.866025	-0.977483	0.0576689	0.00404239		496.405	579.274	261.783	289.637	277.617
ENSG00000155438	NIFK	PC	nucleolar protein interacting with the FHA domain of MKI67	This gene encodes a protein that interacts with the forkhead-associated domain of the Ki-67 antigen. The encoded protein may bind RNA and may play a role in mitosis and cell cycle progression. Multiple pseudogenes exist on chromosomes 5, 10, 12, 15, and 19.[provided by RefSeq, Jan 2009].	GO:0006461 (protein complex assembly), GO:0009303 (rRNA transcription), GO:0010923 (negative regulation of phosphatase activity), GO:0016072 (rRNA metabolic process), GO:0000794 (condensed nuclear chromosome), GO:0005654 (nucleoplasm), GO:0005730 (nucleolus), GO:0005737 (cytoplasm), GO:0003723 (RNA binding), GO:0005515 (protein binding)			0.554592	0.906815		-0.493536	-0.454317	-0.513553				591.716	72.5151	15.0852	-1.27921	5.64515	106.856	3.62881e-06	0.000482475	4.9169e-18	5.38078e-18	0.2	0.354767	0.132393	-0.866025	-0.964373	0.0576689	0.00802928		67.3816	86.5675	31.5526	32.4773	31.0903
ENSG00000135317	SNX14	PC	sorting nexin 14	This gene encodes a member of the sorting nexin family. Members of this family have a phox (PX) phosphoinositide binding domain and are involved in intracellular trafficking. The encoded protein also contains a regulator of G protein signaling (RGS) domain. Regulator of G protein signaling family members are regulatory molecules that act as GTPase activating proteins for G alpha subunits of heter…	GO:0015031 (protein transport), GO:0097352 (autophagic vacuole maturation), GO:0005764 (lysosome), GO:0005765 (lysosomal membrane), GO:0005770 (late endosome), GO:0016021 (integral component of membrane), GO:0030425 (dendrite), GO:0031902 (late endosome membrane), GO:0080025 (phosphatidylinositol-3,5-bisphosphate binding)			0.734094	0.829342		-0.681571	-0.48539	-0.396474				590.985	57.4738	67.1976	-1.40251	4.72361	106.649	3.6573e-06	0.000482475	1.63137e-17	1.90068e-17	0.2	0.354767	0.00463501	-0.866025	-0.993639	0.0576689	0.000608452		40.3365	43.226	13.8693	16.1808	17.3366
ENSG00000155975	VPS37A	PC	VPS37A, ESCRT-I subunit	This gene belongs to the VPS37 family, and encodes a component of the ESCRT-I (endosomal sorting complex required for transport I) protein complex, required for the sorting of ubiquitinated transmembrane proteins into internal vesicles of multivesicular bodies. Expression of this gene is downregulated in hepatocellular carcinoma, and mutations in this gene are associated with autosomal recessive …	hsa04144 (Endocytosis), GO:0015031 (protein transport), GO:0016197 (endosomal transport), GO:0016236 (macroautophagy), GO:0019058 (viral life cycle), GO:0036258 (multivesicular body assembly), GO:0039702 (viral budding via host ESCRT complex), GO:0043162 (ubiquitin-dependent protein catabolic process via the multivesicular body sorting pathway), GO:0075733 (intracellular transport of virus), GO:0…			0.613999	0.564228		-0.334646	-0.437627	-0.405954				585.043	69.0572	53.5945	-1.02741	5.42764	104.976	3.89832e-06	0.000503025	9.32316e-16	1.02638e-15	0.2	0.354767	0.0028775	-0.866025	-0.997802	0.0576689	0.000123696		62.7585	60.5626	31.5526	29.2411	29.9346
ENSG00000166710	B2M	PC	beta-2-microglobulin	This gene encodes a serum protein found in association with the major histocompatibility complex (MHC) class I heavy chain on the surface of nearly all nucleated cells. The protein has a predominantly beta-pleated sheet structure that can form amyloid fibrils in some pathological conditions. The encoded antimicrobial protein displays antibacterial activity in amniotic fluid. A mutation in this ge…	hsa04612 (Antigen processing and presentation), hsa05163 (Human cytomegalovirus infection), hsa05166 (Human T-cell leukemia virus 1 infection), hsa05169 (Epstein-Barr virus infection), hsa05170 (Human immunodeficiency virus 1 infection), GO:0001895 (retina homeostasis), GO:0001916 (positive regulation of T cell mediated cytotoxicity), GO:0002237 (response to molecule of bacterial origin), GO:0002…			0.459536	0.518889		-0.267215	-0.413466	-0.297744				584.573	98.9183	25.017	-0.815917	9.95668	104.844	3.91816e-06	0.000503025	4.66931e-16	4.6516e-16	0.2	0.354767	0.00192719	-0.866025	-0.994123	0.0576689	0.000540364		1313.42	1368.67	792.861	716.233	776.218
ENSG00000198712	MT-CO2	PC	mitochondrially encoded cytochrome c oxidase II		hsa00190 (Oxidative phosphorylation), hsa01100 (Metabolic pathways), hsa04260 (Cardiac muscle contraction), hsa04714 (Thermogenesis), hsa04932 (Non-alcoholic fatty liver disease (NAFLD)), hsa05010 (Alzheimer disease), hsa05012 (Parkinson disease), hsa05016 (Huntington disease), R-HSA-1428517 (Homo sapiens: The citric acid (TCA) cycle and respiratory electron transport), R-HSA-1430728 (Homo sapien…			0.734557	0.510038		-0.432986	-0.328105	-0.483504				584.02	99.9659	9.31005	-1.04026	13.4095	104.689	3.9416e-06	0.000503025	2.23373e-16	2.23349e-16	0.2	0.354767	0.0850782	-0.866025	-0.979322	0.0576689	0.00355822		16951.3	14508	7545.24	8114.34	7285.54
ENSG00000115368	WDR75	PC	WD repeat domain 75		hsa03008 (Ribosome biogenesis in eukaryotes), GO:0006364 (rRNA processing), GO:0045943 (positive regulation of transcription from RNA polymerase I promoter), GO:1903146 (regulation of mitochondrion degradation), GO:1903955 (NA), GO:2000234 (positive regulation of rRNA processing), GO:0005654 (nucleoplasm), GO:0005730 (nucleolus), GO:0003723 (RNA binding), R-HSA-6790901 (Homo sapiens: rRNA modific…			0.78329	0.498009		-0.423336	-0.490956	-0.367007				582.242	81.901	62.9813	-1.10053	6.35372	104.191	4.01814e-06	0.000507279	1.40979e-17	1.35912e-17	0.2	0.354767	0.113991	-0.866025	-0.970714	0.0576689	0.0059897		131.989	107.949	56.055	53.3968	58.3666
ENSG00000156976	EIF4A2	PC	eukaryotic translation initiation factor 4A2		hsa03013 (RNA transport), GO:0000289 (nuclear-transcribed mRNA poly(A) tail shortening), GO:0006413 (translational initiation), GO:0006446 (regulation of translational initiation), GO:0010468 (regulation of gene expression), GO:0010501 (RNA secondary structure unwinding), GO:0016032 (viral process), GO:1900260 (negative regulation of RNA-directed RNA polymerase activity), GO:0005829 (cytosol), GO…			0.487213	0.443751		-0.324527	-0.350058	-0.256378				575.775	95.2304	30.3663	-0.780883	8.13153	102.387	4.31108e-06	0.000538473	2.29051e-15	2.31777e-15	0.2	0.354767	0.00152086	-0.866025	-0.997041	0.0576689	0.00019311		379.672	368.345	215.436	211.622	225.954
ENSG00000100526	CDKN3	PC	cyclin dependent kinase inhibitor 3	The protein encoded by this gene belongs to the dual specificity protein phosphatase family. It was identified as a cyclin-dependent kinase inhibitor, and has been shown to interact with, and dephosphorylate CDK2 kinase, thus prevent the activation of CDK2 kinase. This gene was reported to be deleted, mutated, or overexpressed in several kinds of cancers. Alternatively spliced transcript variants…	GO:0000079 (regulation of cyclin-dependent protein serine/threonine kinase activity), GO:0000082 (G1/S transition of mitotic cell cycle), GO:0007050 (cell cycle arrest), GO:0008285 (negative regulation of cell proliferation), GO:0035335 (peptidyl-tyrosine dephosphorylation), GO:0005634 (nucleus), GO:0005829 (cytosol), GO:0048471 (perinuclear region of cytoplasm), GO:0004722 (protein serine/threon…			0.466684	0.476957		-0.325056	-0.284577	-0.334008				574.44	87.5309	10.3663	-0.79922	6.90235	102.016	4.37453e-06	0.000540645	5.03906e-15	5.24055e-15	0.2	0.354767	1.40237e-05	-0.866025	-0.999407	0.0576689	1.73406e-05		159.728	160.884	91.4217	94.08	90.8439
ENSG00000041357	PSMA4	PC	proteasome subunit alpha 4	The proteasome is a multicatalytic proteinase complex with a highly ordered ring-shaped 20S core structure. The core structure is composed of 4 rings of 28 non-identical subunits; 2 rings are composed of 7 alpha subunits and 2 rings are composed of 7 beta subunits. Proteasomes are distributed throughout eukaryotic cells at a high concentration and cleave peptides in an ATP/ubiquitin-dependent pro…	hsa03050 (Proteasome), GO:0000165 (MAPK cascade), GO:0000209 (protein polyubiquitination), GO:0002223 (stimulatory C-type lectin receptor signaling pathway), GO:0002479 (antigen processing and presentation of exogenous peptide antigen via MHC class I, TAP-dependent), GO:0006521 (regulation of cellular amino acid metabolic process), GO:0010972 (negative regulation of G2/M transition of mitotic cel…			0.866127	0.489016		-0.516704	-0.444081	-0.394359				571.142	93.5355	30.5026	-1.15141	7.7616	101.102	4.53587e-06	0.000552457	2.74561e-18	2.68355e-18	0.2	0.354767	0.146398	-0.866025	-0.955056	0.0576689	0.0113603		365.803	281.2	139.04	146.321	151.522
ENSG00000269897	COMMD3-BMI1	PC	COMMD3-BMI1 readthrough	This locus represents naturally occurring read-through transcription between the neighboring COMM domain-containing protein 3 and polycomb complex protein BMI-1 genes on chromosome 10. The read-through transcript produces a fusion protein that shares sequence identity with each individual gene product. [provided by RefSeq, Feb 2011]. Sequence Note: This RefSeq record was created from transcript a…	hsa04550 (Signaling pathways regulating pluripotency of stem cells), hsa05202 (Transcriptional misregulation in cancer), hsa05206 (MicroRNAs in cancer)			0.570258	0.766487		-0.351089	-0.455718	-0.529939				570.576	67.0215	10.0256	-1.17376	5.29037	100.946	4.56421e-06	0.000552457	2.58916e-16	2.87254e-16	0.2	0.354767	0.0658047	-0.866025	-0.984707	0.0576689	0.00226498		54.3214	62.5274	27.7386	25.6582	24.2713
ENSG00000113643	RARS	PC	arginyl-tRNA synthetase	Aminoacyl-tRNA synthetases catalyze the aminoacylation of tRNA by their cognate amino acid. Because of their central role in linking amino acids with nucleotide triplets contained in tRNAs, aminoacyl-tRNA synthetases are thought to be among the first proteins that appeared in evolution. Arginyl-tRNA synthetase belongs to the class-I aminoacyl-tRNA synthetase family. [provided by RefSeq, Jul 2008]…	hsa00970 (Aminoacyl-tRNA biosynthesis), GO:0006418 (tRNA aminoacylation for protein translation), GO:0006420 (arginyl-tRNA aminoacylation), GO:0005634 (nucleus), GO:0005654 (nucleoplasm), GO:0005737 (cytoplasm), GO:0005739 (mitochondrion), GO:0005829 (cytosol), GO:0016020 (membrane), GO:0017101 (aminoacyl-tRNA synthetase multienzyme complex), GO:0070062 (extracellular vesicular exosome), GO:00000…			0.574903	0.43471		-0.40232	-0.324114	-0.283179				569.232	93.6121	17.2913	-0.849845	7.77217	100.574	4.63237e-06	0.000554987	7.77106e-16	7.84579e-16	0.2	0.354767	0.0534158	-0.866025	-0.987875	0.0576689	0.00159976		312.521	283.396	157.763	166.663	171.517
ENSG00000163507	CIP2A	PC	cell proliferation regulating inhibitor of protein phosphatase 2A		GO:0007283 (spermatogenesis), GO:2000179 (positive regulation of neural precursor cell proliferation), GO:0005737 (cytoplasm), GO:0005829 (cytosol), GO:0005886 (plasma membrane), GO:0016021 (integral component of membrane), GO:0005515 (protein binding), GO:0045296 (cadherin binding)			0.540226	0.583922		-0.39391	-0.352136	-0.378102				563.639	68.3417	76.414	-0.981885	5.38518	99.0352	4.92861e-06	0.000584513	1.14997e-14	1.26312e-14	0.2	0.354767	0.0121551	-0.866025	-0.99895	0.0576689	4.08213e-05		58.1354	59.9847	29.4722	30.3969	29.819
ENSG00000070081	NUCB2	PC	nucleobindin 2	This gene encodes a protein with a suggested role in calcium level maintenance, eating regulation in the hypothalamus, and release of tumor necrosis factor from vascular endothelial cells. This protein binds calcium and has EF-folding domains. [provided by RefSeq, Oct 2011]. Publication Note: This RefSeq record includes a subset of the publications that are available for this gene. Please see the…	GO:0005615 (extracellular space), GO:0005635 (nuclear envelope), GO:0005783 (endoplasmic reticulum), GO:0005793 (endoplasmic reticulum-Golgi intermediate compartment), GO:0005794 (Golgi apparatus), GO:0005829 (cytosol), GO:0005886 (plasma membrane), GO:0070062 (extracellular vesicular exosome), GO:0003677 (DNA binding), GO:0005509 (calcium ion binding), GO:0005515 (protein binding)			0.798028	0.482353		-0.422364	-0.511924	-0.346093				560.289	89.2343	29.77	-1.08963	7.12079	98.1176	5.11634e-06	0.00060071	2.48828e-17	2.43322e-17	0.2	0.354767	0.124171	-0.866025	-0.963906	0.0576689	0.00818703		226.185	181.341	95.9293	90.0348	101.246
ENSG00000211460	TSN	PC	translin	This gene encodes a DNA-binding protein which specifically recognizes conserved target sequences at the breakpoint junction of chromosomal translocations. Translin polypeptides form a multimeric structure that is responsible for its DNA-binding activity. Recombination-associated motifs and translin-binding sites are present at recombination hotspots and may serve as indicators of breakpoints in g…	GO:0006310 (DNA recombination), GO:0016070 (RNA metabolic process), GO:0031047 (gene silencing by RNA), GO:0090305 (nucleic acid phosphodiester bond hydrolysis), GO:0005634 (nucleus), GO:0005829 (cytosol), GO:0003677 (DNA binding), GO:0003697 (single-stranded DNA binding), GO:0003729 (mRNA binding), GO:0004519 (endonuclease activity), GO:0005515 (protein binding), GO:0032403 (protein complex bind…			0.522532	0.823507		-0.574768	-0.408166	-0.363105				557.886	81.9181	54.2589	-1.15476	6.35576	97.4613	5.25603e-06	0.000605687	2.71873e-17	2.59176e-17	0.2	0.354767	0.110173	-0.866025	-0.96759	0.0576689	0.00697002		109.105	134.879	49.9294	56.2862	58.1354
ENSG00000143228	NUF2	PC	NUF2, NDC80 kinetochore complex component	This gene encodes a protein that is highly similar to yeast Nuf2, a component of a conserved protein complex associated with the centromere. Yeast Nuf2 disappears from the centromere during meiotic prophase when centromeres lose their connection to the spindle pole body, and plays a regulatory role in chromosome segregation. The encoded protein is found to be associated with centromeres of mitoti…	GO:0007059 (chromosome segregation), GO:0007062 (sister chromatid cohesion), GO:0007067 (mitotic nuclear division), GO:0051301 (cell division), GO:0000775 (chromosome, centromeric region), GO:0000777 (condensed chromosome kinetochore), GO:0005634 (nucleus), GO:0005829 (cytosol), GO:0016020 (membrane), GO:0031262 (Ndc80 complex), GO:0003674 (molecular_function), GO:0005515 (protein binding), R-HSA…			0.511834	0.508829		-0.261808	-0.365509	-0.393345				557.786	81.4156	24.5145	-0.870661	6.31445	97.4341	5.26191e-06	0.000605687	6.04853e-15	6.30362e-15	0.2	0.354767	0.00116912	-0.866025	-0.99695	0.0576689	0.000202062		109.105	108.874	62.9897	58.4822	57.3264
ENSG00000209082	MT-TL1	Mt_tRNA	mitochondrially encoded tRNA leucine 1 (UUA/G)					1.50326	0.746886		-0.832473	-0.623284	-0.794389				555.119	74.8999	0.32368	-2.00156	5.81767	96.708	5.42219e-06	0.000607208	2.69131e-20	3.07121e-20	0.2	0.354767	0.212674	-0.866025	-0.911563	0.0576689	0.0311487		128.869	75.4721	23.9245	27.9697	24.618
ENSG00000128789	PSMG2	PC	proteasome assembly chaperone 2		GO:0007094 (mitotic spindle assembly checkpoint), GO:0043066 (negative regulation of apoptotic process), GO:0043248 (proteasome assembly), GO:0000502 (proteasome complex), GO:0005634 (nucleus), GO:0005829 (cytosol), GO:0005515 (protein binding)			0.484595	0.469303		-0.390094	-0.272008	-0.291796				554.967	89.0554	10.8603	-0.805528	7.09297	96.6667	5.43148e-06	0.000607208	8.7807e-15	9.04716e-15	0.2	0.354767	0.000373695	-0.866025	-0.996978	0.0576689	0.000199311		184.346	182.381	99.6277	108.296	106.794
ENSG00000242539	AC007620.2	antisense						0.69675	0.720812		-0.407343	-0.549753	-0.460466				553.995	52.1932	24.3867	-1.29569	4.41049	96.4026	5.49141e-06	0.000607208	1.06037e-14	1.24274e-14	0.2	0.354767	4.51301e-05	-0.866025	-0.99854	0.0576689	6.69275e-05		32.3617	32.9396	13.9849	12.4824	13.407
ENSG00000077721	UBE2A	PC	ubiquitin conjugating enzyme E2 A	The modification of proteins with ubiquitin is an important cellular mechanism for targeting abnormal or short-lived proteins for degradation. Ubiquitination involves at least three classes of enzymes: ubiquitin-activating enzymes, ubiquitin-conjugating enzymes, and ubiquitin-protein ligases. This gene encodes a member of the E2 ubiquitin-conjugating enzyme family. This enzyme is required for pos…	hsa04120 (Ubiquitin mediated proteolysis), GO:0000209 (protein polyubiquitination), GO:0001701 (in utero embryonic development), GO:0006281 (DNA repair), GO:0006301 (postreplication repair), GO:0006511 (ubiquitin-dependent protein catabolic process), GO:0008284 (positive regulation of cell proliferation), GO:0009411 (response to UV), GO:0016567 (protein ubiquitination), GO:0033522 (histone H2A ub…			0.454438	0.664005		-0.414482	-0.335545	-0.368416				552.73	79.9421	37.3254	-0.961023	6.19618	96.0592	5.57051e-06	0.000607208	2.14498e-15	2.17766e-15	0.2	0.354767	0.092435	-0.866025	-0.980585	0.0576689	0.00323783		95.5825	110.839	51.432	54.437	53.1656
ENSG00000140961	OSGIN1	PC	oxidative stress induced growth inhibitor 1	This gene encodes an oxidative stress response protein that regulates cell death. Expression of the gene is regulated by p53 and is induced by DNA damage. The protein regulates apoptosis by inducing cytochrome c release from mitochondria. It also appears to be a key regulator of both inflammatory and anti-inflammatory molecules. The loss of this protein correlates with uncontrolled cell growth an…	GO:0007275 (multicellular organismal development), GO:0030154 (cell differentiation), GO:0030308 (negative regulation of cell growth), GO:0043065 (positive regulation of apoptotic process), GO:0055114 (oxidation-reduction process), GO:0005575 (cellular_component), GO:0005515 (protein binding), GO:0008083 (growth factor activity), GO:0016491 (oxidoreductase activity)			-0.907749	-0.879351		0.622572	0.592474	0.572054				552.677	34.0857	41.2351	1.8996	3.38837	96.0449	5.57385e-06	0.000607208	1.02225e-14	1.63891e-14	0.2	0.354767	6.48649e-05	0.866025	0.99935	0.0576689	1.98862e-05		3.81405	3.92963	14.7939	14.4472	14.216
ENSG00000094880	CDC23	PC	cell division cycle 23	The protein encoded by this gene shares strong similarity with Saccharomyces cerevisiae Cdc23, a protein essential for cell cycle progression through the G2/M transition. This protein is a component of anaphase-promoting complex (APC), which is composed of eight protein subunits and highly conserved in eukaryotic cells. APC catalyzes the formation of cyclin B-ubiquitin conjugate that is responsib…	hsa04110 (Cell cycle), hsa04114 (Oocyte meiosis), hsa04120 (Ubiquitin mediated proteolysis), hsa04914 (Progesterone-mediated oocyte maturation), hsa05166 (Human T-cell leukemia virus 1 infection), GO:0006511 (ubiquitin-dependent protein catabolic process), GO:0007067 (mitotic nuclear division), GO:0007080 (mitotic metaphase plate congression), GO:0007091 (metaphase/anaphase transition of mitotic …			0.582576	0.612061		-0.381229	-0.329862	-0.483546				552.404	66.2465	21.925	-1.04724	5.2436	95.9708	5.5911e-06	0.000607208	7.4203e-15	8.21521e-15	0.2	0.354767	0.000118876	-0.866025	-0.997214	0.0576689	0.000176455		53.9747	55.1304	26.6984	27.7386	24.7336
ENSG00000144895	EIF2A	PC	eukaryotic translation initiation factor 2A	EIF2A is a 65-kD protein that catalyzes the formation of puromycin-sensitive 80S preinitiation complexes (Zoll et al., 2002 [PubMed 12133843]).[supplied by OMIM, Mar 2008]. Publication Note: This RefSeq record includes a subset of the publications that are available for this gene. Please see the Gene record to access additional publications.	GO:0006413 (translational initiation), GO:0006417 (regulation of translation), GO:0006468 (protein phosphorylation), GO:0009967 (positive regulation of signal transduction), GO:0032933 (SREBP signaling pathway), GO:0042255 (ribosome assembly), GO:1990928 (NA), GO:0005615 (extracellular space), GO:0005737 (cytoplasm), GO:0005850 (eukaryotic translation initiation factor 2 complex), GO:0022627 (cyt…			0.972413	0.513684		-0.516302	-0.513635	-0.45616				551.131	84.4988	30.2385	-1.28318	6.59705	95.626	5.67234e-06	0.000607208	7.65662e-18	7.14765e-18	0.2	0.354767	0.168171	-0.866025	-0.943629	0.0576689	0.0159298		173.251	125.517	60.447	60.5626	63.1053
ENSG00000138385	SSB	PC	Sjogren syndrome antigen B	The protein encoded by this gene is involved in diverse aspects of RNA metabolism, including binding and protecting poly(U) termini of nascent RNA polymerase III transcripts from exonuclease digestion, processing 5_ and 3_ ends of pre-tRNA precursors, acting as an RNA chaperone, and binding viral RNAs associated with hepatitis C virus. Autoantibodies reacting with this protein are found in the se…	hsa05322 (Systemic lupus erythematosus), GO:0001682 (tRNA 5'-leader removal), GO:0006400 (tRNA modification), GO:0006409 (tRNA export from nucleus), GO:0008033 (tRNA processing), GO:0008334 (histone mRNA metabolic process), GO:0042780 (tRNA 3'-end processing), GO:0071045 (nuclear histone mRNA catabolic process), GO:0075522 (IRES-dependent viral translational initiation), GO:1903608 (NA), GO:00007…			0.662122	0.432554		-0.286853	-0.391435	-0.416388				550.874	94.285	18.3646	-0.923291	7.90819	95.5566	5.68886e-06	0.000607208	5.49469e-16	5.4966e-16	0.2	0.354767	0.0971595	-0.866025	-0.97474	0.0576689	0.00480099		361.757	308.245	186.426	173.251	170.246
ENSG00000109881	CCDC34	PC	coiled-coil domain containing 34					0.596548	0.715615		-0.355906	-0.355906	-0.600352				550.027	69.1083	60.7496	-1.14173	5.43074	93.4402	6.2225e-06	0.00061886	7.27083e-16	7.98321e-16	0.138641	0.354767	0.011971	-0.888523	-0.989246	0.043925	0.00133661		61.1405	66.5726	30.628	30.628	25.5426
ENSG00000119326	CTNNAL1	PC	catenin alpha like 1		GO:0007155 (cell adhesion), GO:0007266 (Rho protein signal transduction), GO:0005829 (cytosol), GO:0005856 (cytoskeleton), GO:0005886 (plasma membrane), GO:0005515 (protein binding), GO:0045296 (cadherin binding), GO:0051015 (actin filament binding)			0.50874	0.423856		-0.28602	-0.384826	-0.261751				549.328	97.1979	50.6729	-0.780319	8.77316	95.1386	5.78965e-06	0.000609381	9.22074e-15	9.25097e-15	0.2	0.354767	0.015449	-0.866025	-0.992655	0.0576689	0.00075479		600.771	566.329	345.461	322.461	351.355
ENSG00000100991	TRPC4AP	PC	transient receptor potential cation channel subfamily C member 4 associated protein		GO:0006511 (ubiquitin-dependent protein catabolic process), GO:0016567 (protein ubiquitination), GO:0048820 (hair follicle maturation), GO:0070588 (calcium ion transmembrane transport), GO:0005886 (plasma membrane), GO:0031464 (Cul4A-RING E3 ubiquitin ligase complex), GO:0005262 (calcium channel activity), GO:0005515 (protein binding), GO:0019902 (phosphatase binding), R-HSA-2672351 (Homo sapiens…			-0.568415	-0.437718		0.326596	0.330209	0.349329				548.974	86.7728	91.5673	0.85352	6.81826	95.043	5.81302e-06	0.000609381	1.22553e-14	9.4268e-15	0.2	0.354767	0.0305962	0.866025	0.996943	0.0576689	0.000202815		72.3515	79.4017	136.266	136.613	138.462
ENSG00000196305	IARS	PC	isoleucyl-tRNA synthetase	Aminoacyl-tRNA synthetases catalyze the aminoacylation of tRNA by their cognate amino acid. Because of their central role in linking amino acids with nucleotide triplets contained in tRNAS, aminoacyl-tRNA synthetases are thought to be among the first proteins that appeared in evolution. Isoleucine-tRNA synthetase belongs to the class-I aminoacyl-tRNA synthetase family and has been identified as a…	hsa00970 (Aminoacyl-tRNA biosynthesis), GO:0001649 (osteoblast differentiation), GO:0006418 (tRNA aminoacylation for protein translation), GO:0006428 (isoleucyl-tRNA aminoacylation), GO:0006450 (regulation of translational fidelity), GO:0005737 (cytoplasm), GO:0005829 (cytosol), GO:0016020 (membrane), GO:0017101 (aminoacyl-tRNA synthetase multienzyme complex), GO:0070062 (extracellular vesicular …			0.550626	0.446989		-0.307652	-0.353702	-0.336261				548.101	80.155	70.8433	-0.854448	6.21246	94.8074	5.87107e-06	0.00061002	2.64511e-14	2.77816e-14	0.2	0.354767	0.0476762	-0.866025	-0.994105	0.0576689	0.000542899		104.713	97.3162	56.8641	55.0149	55.7083
ENSG00000147853	AK3	PC	adenylate kinase 3	The protein encoded by this gene is a GTP:ATP phosphotransferase that is found in the mitochondrial matrix. Several transcript variants encoding a few different isoforms have been found for this gene. [provided by RefSeq, Dec 2010].	hsa00230 (Purine metabolism), GO:0007596 (blood coagulation), GO:0016310 (phosphorylation), GO:0046033 (AMP metabolic process), GO:0046039 (GTP metabolic process), GO:0046041 (ITP metabolic process), GO:0046051 (UTP metabolic process), GO:0005739 (mitochondrion), GO:0005759 (mitochondrial matrix), GO:0005515 (protein binding), GO:0005524 (ATP binding), GO:0005525 (GTP binding), GO:0046899 (nucleo…			0.58646	0.574879		-0.3617	-0.465492	-0.334146				546.904	66.9279	79.3441	-1.01671	5.28354	94.4846	5.95179e-06	0.000612982	1.63111e-14	1.79901e-14	0.2	0.354767	0.000371864	-0.866025	-0.997891	0.0576689	0.000116236		55.8239	55.3616	27.9697	25.8893	28.5476
ENSG00000274012	RN7SL2	misc_RNA	RNA, 7SL, cytoplasmic 2					-1.08925	-1.59763		0.863408	0.89984	0.923627				545.859	26.1307	1.33731	3.57506	2.95302	94.2033	6.02325e-06	0.000614947	3.56315e-24	9.93991e-24	0.2	0.354767	0.0178569	0.866025	0.997511	0.0576689	0.000149		1.50251	0.46231	11.5577	11.9045	12.1356
ENSG00000117614	SYF2	PC	SYF2 pre-mRNA splicing factor	This gene encodes a nuclear protein that interacts with cyclin D-type binding-protein 1, which is thought to be a cell cycle regulator at the G1/S transition. Alternate transcriptional splice variants, encoding different isoforms, have been characterized. [provided by RefSeq, Jul 2008].	hsa03040 (Spliceosome), GO:0000398 (mRNA splicing, via spliceosome), GO:0001701 (in utero embryonic development), GO:0007095 (mitotic G2 DNA damage checkpoint), GO:0007369 (gastrulation), GO:0008284 (positive regulation of cell proliferation), GO:0048568 (embryonic organ development), GO:0000974 (Prp19 complex), GO:0005634 (nucleus), GO:0005654 (nucleoplasm), GO:0016607 (nuclear speck), GO:007101…			0.521936	0.57043		-0.288408	-0.386384	-0.417574				542.961	72.5662	34.7104	-0.945732	5.64915	93.4245	6.22669e-06	0.00061886	2.06641e-14	2.15491e-14	0.2	0.354767	0.000915877	-0.866025	-0.996537	0.0576689	0.000244509		68.9997	71.4268	38.4873	35.829	35.02
ENSG00000232220	AC008440.2	antisense						0.715349	0.912409		-0.540091	-0.647799	-0.439868				542.594	45.9842	2.35945	-1.53458	4.04478	93.3261	6.25296e-06	0.00061886	4.74683e-15	5.77008e-15	0.2	0.354767	0.0583386	-0.866025	-0.988027	0.0576689	0.0015698		24.8491	28.7788	9.24619	8.43715	10.0552
ENSG00000129562	DAD1	PC	defender against cell death 1	DAD1, the defender against apoptotic cell death, was initially identified as a negative regulator of programmed cell death in the temperature sensitive tsBN7 cell line. The DAD1 protein disappeared in temperature-sensitive cells following a shift to the nonpermissive temperature, suggesting that loss of the DAD1 protein triggered apoptosis. DAD1 is believed to be a tightly associated subunit of o…	hsa00510 (N-Glycan biosynthesis), hsa01100 (Metabolic pathways), hsa04141 (Protein processing in endoplasmic reticulum), GO:0001824 (blastocyst development), GO:0006486 (protein glycosylation), GO:0006487 (protein N-linked glycosylation), GO:0006915 (apoptotic process), GO:0007584 (response to nutrient), GO:0018279 (protein N-linked glycosylation via asparagine), GO:0042493 (response to drug), GO…			0.560145	0.409043		-0.379714	-0.284995	-0.30448				542.324	93.1096	4.35264	-0.816845	7.68443	93.2537	6.27241e-06	0.00061886	9.5925e-15	9.72499e-15	0.2	0.354767	0.0661668	-0.866025	-0.986171	0.0576689	0.00194822		292.064	262.823	151.291	161.693	159.497
ENSG00000116209	TMEM59	PC	transmembrane protein 59		GO:0006508 (proteolysis), GO:0006914 (autophagy), GO:0010508 (positive regulation of autophagy), GO:0010955 (negative regulation of protein processing), GO:0090005 (negative regulation of establishment of protein localization to plasma membrane), GO:0090285 (negative regulation of protein glycosylation in Golgi), GO:0000137 (Golgi cis cisterna), GO:0000138 (Golgi trans cisterna), GO:0000139 (Golg…			0.696874	0.425516		-0.425891	-0.382312	-0.314188				541.049	93.4162	64.6167	-0.949826	7.7285	92.9121	6.36513e-06	0.000622775	7.48504e-16	7.47622e-16	0.2	0.354767	0.118423	-0.866025	-0.968157	0.0576689	0.00678855		326.275	269.989	148.748	153.371	160.884
ENSG00000159593	NAE1	PC	NEDD8 activating enzyme E1 subunit 1	The protein encoded by this gene binds to the beta-amyloid precursor protein. Beta-amyloid precursor protein is a cell surface protein with signal-transducing properties, and it is thought to play a role in the pathogenesis of Alzheimer_s disease. In addition, the encoded protein can form a heterodimer with UBE1C and bind and activate NEDD8, a ubiquitin-like protein. This protein is required for …	hsa05010 (Alzheimer disease), GO:0007165 (signal transduction), GO:0033314 (mitotic DNA replication checkpoint), GO:0042981 (regulation of apoptotic process), GO:0043523 (regulation of neuron apoptotic process), GO:0045116 (protein neddylation), GO:0051402 (neuron apoptotic process), GO:0005737 (cytoplasm), GO:0005886 (plasma membrane), GO:0005515 (protein binding), GO:0019781 (NEDD8 activating e…			0.485032	0.685208		-0.275842	-0.442612	-0.451786				538.943	80.8534	15.6559	-1.00184	6.26761	92.3491	6.52166e-06	0.000624779	1.42858e-15	1.43025e-15	0.2	0.354767	0.0687142	-0.866025	-0.979744	0.0576689	0.00345007		102.055	117.542	59.4068	52.7033	52.3566
ENSG00000152601	MBNL1	PC	muscleblind like splicing regulator 1		GO:0001701 (in utero embryonic development), GO:0006397 (mRNA processing), GO:0007399 (nervous system development), GO:0008380 (RNA splicing), GO:0030326 (embryonic limb morphogenesis), GO:0043484 (regulation of RNA splicing), GO:0045445 (myoblast differentiation), GO:0005634 (nucleus), GO:0005654 (nucleoplasm), GO:0005737 (cytoplasm), GO:0005813 (centrosome), GO:0005829 (cytosol), GO:0010494 (cy…			0.531691	0.668344		-0.498363	-0.276798	-0.424874				538.674	74.2271	91.3799	-1.03552	5.77263	92.2772	6.54199e-06	0.000624779	2.39629e-15	2.39405e-15	0.2	0.354767	0.0264087	-0.866025	-0.987523	0.0576689	0.00166996		74.7786	82.4067	35.5978	41.839	37.5627
ENSG00000114784	EIF1B	PC	eukaryotic translation initiation factor 1B		hsa03013 (RNA transport), GO:0006413 (translational initiation), GO:0006446 (regulation of translational initiation), GO:0005575 (cellular_component), GO:0003723 (RNA binding), GO:0003743 (translation initiation factor activity)			0.517643	0.520724		-0.417061	-0.244944	-0.376362				538.63	80.8875	13.0494	-0.885685	6.27064	92.2657	6.54525e-06	0.000624779	1.24778e-14	1.29447e-14	0.2	0.354767	0.00192748	-0.866025	-0.995076	0.0576689	0.000414421		106.1	106.331	54.5525	61.7183	56.1706
ENSG00000168028	RPSA	PC	ribosomal protein SA	Laminins, a family of extracellular matrix glycoproteins, are the major noncollagenous constituent of basement membranes. They have been implicated in a wide variety of biological processes including cell adhesion, differentiation, migration, signaling, neurite outgrowth and metastasis. Many of the effects of laminin are mediated through interactions with cell surface receptors. These receptors i…	hsa03010 (Ribosome), GO:0000028 (ribosomal small subunit assembly), GO:0000184 (nuclear-transcribed mRNA catabolic process, nonsense-mediated decay), GO:0000447 (endonucleolytic cleavage in ITS1 to separate SSU-rRNA from 5.8S rRNA and LSU-rRNA from tricistronic rRNA transcript (SSU-rRNA, 5.8S rRNA, LSU-rRNA)), GO:0000461 (endonucleolytic cleavage to generate mature 3'-end of SSU-rRNA from (SSU-rR…			-0.413225	-0.458333		0.295265	0.254221	0.322072				536.68	99.1483	22.9557	0.727745	10.1885	91.7457	6.69474e-06	0.000630508	1.43087e-13	1.47024e-13	0.2	0.354767	0.000162176	0.866025	0.996569	0.0576689	0.000241093		850.303	824.067	1390.74	1351.68	1416.86
ENSG00000147677	EIF3H	PC	eukaryotic translation initiation factor 3 subunit H		hsa03013 (RNA transport), hsa05162 (Measles), GO:0006413 (translational initiation), GO:0006446 (regulation of translational initiation), GO:0005829 (cytosol), GO:0005852 (eukaryotic translation initiation factor 3 complex), GO:0016020 (membrane), GO:0070062 (extracellular vesicular exosome), GO:0071541 (eukaryotic translation initiation factor 3 complex, eIF3m), GO:0003723 (RNA binding), GO:0003…			0.46327	0.401177		-0.316053	-0.246519	-0.301875				536.078	97.0956	32.1465	-0.723779	8.7107	91.5854	6.74165e-06	0.000630508	8.01866e-14	8.0675e-14	0.2	0.354767	0.0152677	-0.866025	-0.99622	0.0576689	0.000278801		560.435	536.742	325.697	341.878	328.933
ENSG00000146007	ZMAT2	PC	zinc finger matrin-type 2		hsa03040 (Spliceosome), GO:0000398 (mRNA splicing, via spliceosome), GO:0046540 (U4/U6 x U5 tri-snRNP complex), GO:0003677 (DNA binding), GO:0003723 (RNA binding), GO:0005515 (protein binding), GO:0008270 (zinc ion binding)			0.64987	0.409608		-0.376444	-0.323825	-0.359209				535.763	89.5154	21.9761	-0.900147	7.15301	91.5015	6.76637e-06	0.000630508	4.35331e-15	4.39924e-15	0.2	0.354767	0.112426	-0.866025	-0.973459	0.0576689	0.00516986		213.471	180.416	103.789	107.718	105.06
ENSG00000117143	UAP1	PC	UDP-N-acetylglucosamine pyrophosphorylase 1		hsa00520 (Amino sugar and nucleotide sugar metabolism), hsa01100 (Metabolic pathways), GO:0006048 (UDP-N-acetylglucosamine biosynthetic process), GO:0005654 (nucleoplasm), GO:0005829 (cytosol), GO:0005886 (plasma membrane), GO:0003977 (UDP-N-acetylglucosamine diphosphorylase activity), GO:0030246 (carbohydrate binding), GO:0042802 (identical protein binding), R-HSA-392499 (Homo sapiens: Metabolis…			0.434048	0.584193		-0.423821	-0.32454	-0.26988				532.946	89.2428	55.4259	-0.861199	7.12103	90.753	6.99192e-06	0.000646395	9.41364e-15	9.58102e-15	0.2	0.354767	0.0516338	-0.866025	-0.985215	0.0576689	0.00215321		180.301	200.296	98.5875	105.753	109.914
ENSG00000129055	ANAPC13	PC	anaphase promoting complex subunit 13	This gene encodes a component of the anaphase promoting complex, a large ubiquitin-protein ligase that controls cell cycle progression by regulating the degradation of cell cycle regulators such as B-type cyclins. The encoded protein is evolutionarily conserved and is required for the integrity and ubiquitin ligase activity of the anaphase promoting complex. Pseudogenes and splice variants have b…	hsa04110 (Cell cycle), hsa04114 (Oocyte meiosis), hsa04120 (Ubiquitin mediated proteolysis), hsa04914 (Progesterone-mediated oocyte maturation), GO:0007067 (mitotic nuclear division), GO:0051301 (cell division), GO:0070979 (protein K11-linked ubiquitination), GO:0005680 (anaphase-promoting complex), GO:0005515 (protein binding), R-HSA-1280218 (Homo sapiens: Adaptive Immune System), R-HSA-168256 (…			0.458051	0.744564		-0.438199	-0.369796	-0.394621				531.917	77.157	30.6048	-1.04108	5.98759	90.4802	7.07642e-06	0.000646536	3.6169e-15	3.59493e-15	0.2	0.354767	0.122223	-0.866025	-0.968808	0.0576689	0.006582		82.1755	100.668	43.226	45.4219	44.6129
ENSG00000011426	ANLN	PC	anillin actin binding protein	This gene encodes an actin-binding protein that plays a role in cell growth and migration, and in cytokinesis. The encoded protein is thought to regulate actin cytoskeletal dynamics in podocytes, components of the glomerulus. Mutations in this gene are associated with focal segmental glomerulosclerosis 8. Alternative splicing results in multiple transcript variants encoding different isoforms. [p…	GO:0000281 (mitotic cytokinesis), GO:0000921 (septin ring assembly), GO:0002244 (hematopoietic progenitor cell differentiation), GO:0007067 (mitotic nuclear division), GO:0007096 (regulation of exit from mitosis), GO:0090521 (glomerular visceral epithelial cell migration), GO:0005654 (nucleoplasm), GO:0005826 (actomyosin contractile ring), GO:0015629 (actin cytoskeleton), GO:0003779 (actin bindin…			0.396657	0.632579		-0.318693	-0.364952	-0.345591				531.076	92.6838	47.155	-0.871209	7.60152	90.2575	7.14631e-06	0.000646536	7.18571e-15	7.24507e-15	0.2	0.354767	0.113031	-0.866025	-0.973383	0.0576689	0.00519187		244.562	288.366	148.17	143.432	145.396
ENSG00000085231	AK6	PC	adenylate kinase 6	Initiation of transcription by RNA polymerase II requires the activities of more than 70 polypeptides. The protein that coordinates these activities is transcription factor IID (TFIID), which binds to the core promoter to position the polymerase properly, serves as the scaffold for assembly of the remainder of the transcription complex, and acts as a channel for regulatory signals. TFIID is compo…	hsa00230 (Purine metabolism), hsa01100 (Metabolic pathways), hsa03008 (Ribosome biogenesis in eukaryotes), GO:0015949 (nucleobase-containing small molecule interconversion), GO:0046939 (nucleotide phosphorylation), GO:0046940 (nucleoside monophosphate phosphorylation), GO:0005654 (nucleoplasm), GO:0005737 (cytoplasm), GO:0005829 (cytosol), GO:0015030 (Cajal body), GO:0016020 (membrane), GO:000401…			0.537313	0.657535		-0.306381	-0.417711	-0.470756				530.811	66.996	19.7019	-1.04678	5.28866	90.1876	7.16846e-06	0.000646536	2.33453e-14	2.56751e-14	0.2	0.354767	0.0277847	-0.866025	-0.991388	0.0576689	0.000958126		53.8591	58.7133	29.1255	26.814	25.7738
ENSG00000164181	ELOVL7	PC	ELOVL fatty acid elongase 7		hsa00062 (Fatty acid elongation), hsa01040 (Biosynthesis of unsaturated fatty acids), hsa01100 (Metabolic pathways), hsa01212 (Fatty acid metabolism), GO:0019367 (fatty acid elongation, saturated fatty acid), GO:0034626 (fatty acid elongation, polyunsaturated fatty acid), GO:0035338 (long-chain fatty-acyl-CoA biosynthetic process), GO:0042761 (very long-chain fatty acid biosynthetic process), GO:…			0.938232	1.02723		-0.921169	-0.463866	-0.580425				530.274	38.9234	77.5128	-1.92116	3.66829	90.0454	7.21371e-06	0.000646536	1.12891e-16	1.47985e-16	0.2	0.354767	0.00119386	-0.866025	-0.993528	0.0576689	0.000624405		21.613	23.1155	4.50752	6.93465	6.24118
ENSG00000152818	UTRN	PC	utrophin	This gene shares both structural and functional similarities with the dystrophin gene. It contains an actin-binding N-terminus, a triple coiled-coil repeat central region, and a C-terminus that consists of protein-protein interaction motifs which interact with dystroglycan protein components. The protein encoded by this gene is located at the neuromuscular synapse and myotendinous junctions, wher…	GO:0001954 (positive regulation of cell-matrix adhesion), GO:0006936 (muscle contraction), GO:0007517 (muscle organ development), GO:0007528 (neuromuscular junction development), GO:0014894 (response to denervation involved in regulation of muscle adaptation), GO:2000649 (regulation of sodium ion transmembrane transporter activity), GO:0005654 (nucleoplasm), GO:0005737 (cytoplasm), GO:0005856 (cy…			1.01279	0.693037		-0.741725	-0.551157	-0.412948				529.023	54.2288	61.3629	-1.55766	4.52645	89.7149	7.32027e-06	0.000648206	7.32618e-16	8.57154e-16	0.2	0.354767	0.097769	-0.866025	-0.971689	0.0576689	0.00569395		42.1858	33.4019	11.0954	12.9447	14.4472
ENSG00000159147	DONSON	PC	downstream neighbor of SON	This gene lies downstream of the SON gene and spans 10 kb on chromosome 21. The function of this gene is unknown. [provided by RefSeq, Jul 2008].	GO:0007275 (multicellular organismal development), GO:0008150 (biological_process), GO:0033260 (nuclear cell cycle DNA replication), GO:0005575 (cellular_component), GO:0005634 (nucleus), GO:0003674 (molecular_function)			0.509436	0.521935		-0.442051	-0.354917	-0.234404				528.762	84.3029	52.2828	-0.87476	6.58181	89.6459	7.34277e-06	0.000648206	1.41341e-14	1.45426e-14	0.2	0.354767	0.0020161	-0.866025	-0.993309	0.0576689	0.000656415		130.834	131.989	66.6882	70.9645	77.3213
ENSG00000100664	EIF5	PC	eukaryotic translation initiation factor 5	Eukaryotic translation initiation factor-5 (EIF5) interacts with the 40S initiation complex to promote hydrolysis of bound GTP with concomitant joining of the 60S ribosomal subunit to the 40S initiation complex. The resulting functional 80S ribosomal initiation complex is then active in peptidyl transfer and chain elongations (summary by Si et al., 1996 [PubMed 8663286]).[supplied by OMIM, May 20…	hsa03013 (RNA transport), GO:0001731 (formation of translation preinitiation complex), GO:0006413 (translational initiation), GO:0006446 (regulation of translational initiation), GO:0090630 (NA), GO:0005737 (cytoplasm), GO:0005829 (cytosol), GO:0005886 (plasma membrane), GO:0003723 (RNA binding), GO:0003743 (translation initiation factor activity), GO:0003924 (GTPase activity), GO:0005515 (protei…			0.50056	0.494676		-0.34173	-0.42478	-0.228725				526.994	87.9141	37.4702	-0.840378	6.9514	89.1796	7.49698e-06	0.000653638	2.10271e-14	2.15641e-14	0.2	0.354767	0.00242826	-0.866025	-0.993517	0.0576689	0.000626023		168.396	167.703	93.0398	87.7233	100.784
ENSG00000233966	UBE2SP1	p_Pg	ubiquitin conjugating enzyme E2 S pseudogene 1					0.79109	0.546333		-0.543731	-0.302561	-0.49113				526.783	71.2035	8.79898	-1.16424	5.56148	89.124	7.51564e-06	0.000653638	1.66814e-15	1.81261e-15	0.2	0.354767	0.0796797	-0.866025	-0.975454	0.0576689	0.00459926		76.5123	64.261	29.1255	34.7888	30.2813
ENSG00000234545	FAM133B	PC	family with sequence similarity 133 member B		GO:0003723 (RNA binding)			0.913484	0.823808		-0.770377	-0.548853	-0.418061				525.313	42.1003	32.3935	-1.66147	3.84809	88.7372	7.64704e-06	0.000656106	2.37165e-15	2.96672e-15	0.2	0.354767	0.00216415	-0.866025	-0.993873	0.0576689	0.000575197		24.8491	23.2311	6.35676	7.74369	8.66831
ENSG00000179222	MAGED1	PC	MAGE family member D1	This gene is a member of the melanoma antigen gene (MAGE) family. Most of the genes of this family encode tumor specific antigens that are not expressed in normal adult tissues except testis. Although the protein encoded by this gene shares strong homology with members of the MAGE family, it is expressed in almost all normal adult tissues. This gene has been demonstrated to be involved in the p75…	hsa04722 (Neurotrophin signaling pathway), GO:0006355 (regulation of transcription, DNA-templated), GO:0006357 (regulation of transcription from RNA polymerase II promoter), GO:0032922 (circadian regulation of gene expression), GO:0042752 (regulation of circadian rhythm), GO:0042981 (regulation of apoptotic process), GO:0043406 (positive regulation of MAP kinase activity), GO:0045892 (negative re…			-0.486823	-0.43113		0.259027	0.306488	0.352438				525.1	91.4488	78.8245	0.775172	7.39473	88.6812	7.6663e-06	0.000656106	1.65715e-13	1.45545e-13	0.2	0.354767	0.000364987	0.866025	0.994265	0.0576689	0.000520969		115.462	120.085	194.979	201.567	208.155
ENSG00000198888	MT-ND1	PC	mitochondrially encoded NADH:ubiquinone oxidoreductase core subunit 1		hsa00190 (Oxidative phosphorylation), hsa01100 (Metabolic pathways), hsa04714 (Thermogenesis), hsa04723 (Retrograde endocannabinoid signaling), hsa05012 (Parkinson disease), R-HSA-1428517 (Homo sapiens: The citric acid (TCA) cycle and respiratory electron transport), R-HSA-1430728 (Homo sapiens: Metabolism), R-HSA-163200 (Homo sapiens: Respiratory electron transport, ATP synthesis by chemiosmotic…			0.685312	0.594905		-0.481966	-0.219455	-0.578796				524.601	99.8467	21.3203	-1.06005	11.7809	88.5499	7.71166e-06	0.000656106	1.3762e-15	1.37602e-15	0.2	0.354767	0.00198701	-0.866025	-0.984986	0.0576689	0.00220348		5276.22	4955.61	2348.19	2817.2	2195.62
ENSG00000142856	ITGB3BP	PC	integrin subunit beta 3 binding protein	This gene encodes a transcriptional coregulator that binds to and enhances the activity of members of the nuclear receptor families, thyroid hormone receptors and retinoid X receptors. This protein also acts as a corepressor of NF-kappaB-dependent signaling. This protein induces apoptosis in breast cancer cells through a caspase 2-mediated signaling pathway. This protein is also a component of th…	GO:0006351 (transcription, DNA-templated), GO:0006355 (regulation of transcription, DNA-templated), GO:0006915 (apoptotic process), GO:0007062 (sister chromatid cohesion), GO:0007067 (mitotic nuclear division), GO:0007155 (cell adhesion), GO:0007165 (signal transduction), GO:0034080 (CENP-A containing nucleosome assembly), GO:0043065 (positive regulation of apoptotic process), GO:0051301 (cell di…			0.636377	1.26971		-0.718546	-0.619171	-0.568368				523.676	67.0215	16.2606	-1.71353	5.29037	88.3072	7.79643e-06	0.000658546	2.3206e-17	2.6171e-17	0.2	0.354767	0.196553	-0.866025	-0.923796	0.0576689	0.0249616		51.8943	81.5977	19.0703	20.5728	21.3818
ENSG00000104131	EIF3J	PC	eukaryotic translation initiation factor 3 subunit J	This gene encodes a core subunit of the eukaryotic initiation factor 3 complex, which participates in the initiation of translation by aiding in the recruitment of protein and mRNA components to the 40S ribosome. There are pseudogenes for this gene on chromosomes 1, 3, and 9. Alternative splicing results in multiple transcript variants encoding different isoforms. [provided by RefSeq, Sep 2013].	hsa03013 (RNA transport), GO:0006413 (translational initiation), GO:0005829 (cytosol), GO:0005852 (eukaryotic translation initiation factor 3 complex), GO:0003743 (translation initiation factor activity), GO:0005515 (protein binding), R-HSA-156827 (Homo sapiens: L13a-mediated translational silencing of Ceruloplasmin expression), R-HSA-392499 (Homo sapiens: Metabolism of proteins), R-HSA-72613 (Ho…			0.426667	0.736449		-0.34069	-0.372224	-0.450201				523.032	90.1201	27.6831	-0.989973	7.21964	88.1382	7.85612e-06	0.000658848	1.87265e-15	1.86661e-15	0.2	0.354767	0.132896	-0.866025	-0.9616	0.0576689	0.00898077		189.085	234.853	110.261	107.834	102.055
ENSG00000203865	ATP1A1-AS1	processed_transcript	ATP1A1 antisense RNA 1					0.606703	0.419204		-0.320244	-0.410466	-0.295197				521.804	86.4918	18.6797	-0.872579	6.78447	87.8162	7.97142e-06	0.000659239	2.47621e-14	2.5324e-14	0.2	0.354767	0.0809267	-0.866025	-0.980885	0.0576689	0.00316346		161.115	141.236	83.7936	78.5926	85.2961
ENSG00000141499	WRAP53	PC	WD repeat containing antisense to TP53	This gene encodes an essential component of the telomerase holoenzyme complex, a ribonucleoprotein complex required for telomere synthesis. This protein is enriched in Cajal bodies, nuclear sites of RNP processing that are important for telomerase function. It interacts with dyskerin, TERT and TERC, other components of active telomerase, and with small Cajal body RNAs (scaRNAs), which are involve…	GO:0007004 (telomere maintenance via telomerase), GO:0032203 (telomere formation via telomerase), GO:0051973 (positive regulation of telomerase activity), GO:0070200 (establishment of protein localization to telomere), GO:0090666 (NA), GO:0090671 (NA), GO:1904851 (NA), GO:1904867 (NA), GO:0005654 (nucleoplasm), GO:0005697 (telomerase holoenzyme complex), GO:0005829 (cytosol), GO:0015030 (Cajal bo…			-0.596046	-0.461226		0.3202	0.356122	0.38095				521.786	77.1399	68.552	0.910997	5.98602	87.8116	7.97308e-06	0.000659239	1.06805e-13	1.23316e-13	0.2	0.354767	0.0121725	0.866025	0.995668	0.0576689	0.000341997		39.2963	43.3415	75.9344	77.8992	79.2861
ENSG00000113369	ARRDC3	PC	arrestin domain containing 3		GO:0001659 (temperature homeostasis), GO:0031651 (negative regulation of heat generation), GO:0043588 (skin development), GO:0044252 (negative regulation of multicellular organismal metabolic process), GO:0051443 (positive regulation of ubiquitin-protein transferase activity), GO:0060613 (fat pad development), GO:0071879 (positive regulation of adrenergic receptor signaling pathway), GO:0090327 (…			0.979424	1.05219		-0.906446	-0.725239	-0.399931				517.21	36.7686	28.5349	-2.01568	3.548	86.6164	8.41984e-06	0.00069131	1.67101e-16	2.23125e-16	0.2	0.354767	0.000491306	-0.866025	-0.993283	0.0576689	0.000660132		20.3416	21.4974	4.04521	4.85425	6.58791
ENSG00000055044	NOP58	PC	NOP58 ribonucleoprotein		hsa03008 (Ribosome biogenesis in eukaryotes), GO:0000154 (rRNA modification), GO:0006364 (rRNA processing), GO:0016049 (cell growth), GO:0048254 (snoRNA localization), GO:0001650 (fibrillar center), GO:0005634 (nucleus), GO:0005654 (nucleoplasm), GO:0005730 (nucleolus), GO:0005732 (small nucleolar ribonucleoprotein complex), GO:0005829 (cytosol), GO:0015030 (Cajal body), GO:0016020 (membrane), GO…			0.899761	0.452908		-0.410723	-0.505511	-0.436434				513.38	94.1402	13.5264	-1.15385	7.87277	85.6209	8.81565e-06	0.000714151	2.85631e-16	2.8184e-16	0.2	0.354767	0.173161	-0.866025	-0.939657	0.0576689	0.0176323		403.712	295.647	161.577	151.175	158.688
ENSG00000132467	UTP3	PC	UTP3, small subunit processome component		GO:0000462 (maturation of SSU-rRNA from tricistronic rRNA transcript (SSU-rRNA, 5.8S rRNA, LSU-rRNA)), GO:0006364 (rRNA processing), GO:0007420 (brain development), GO:0016569 (covalent chromatin modification), GO:0005634 (nucleus), GO:0005654 (nucleoplasm), GO:0005730 (nucleolus), GO:0032040 (small-subunit processome), GO:0003723 (RNA binding), GO:0005515 (protein binding), R-HSA-6790901 (Homo s…			0.990293	0.515858		-0.450106	-0.528023	-0.528023				512.74	71.6464	75.4259	-1.32931	5.58806	83.7682	9.61519e-06	0.000731621	1.59176e-15	1.72674e-15	0.138641	0.354767	0.171873	-0.888523	-0.940935	0.043925	0.0170784		87.4921	62.4118	30.9747	29.2411	29.2411
ENSG00000182220	ATP6AP2	PC	ATPase H+ transporting accessory protein 2	This gene encodes a protein that is associated with adenosine triphosphatases (ATPases). Proton-translocating ATPases have fundamental roles in energy conservation, secondary active transport, acidification of intracellular compartments, and cellular pH homeostasis. There are three classes of ATPases- F, P, and V. The vacuolar (V-type) ATPases have a transmembrane proton-conducting sector and an …	hsa04614 (Renin-angiotensin system), GO:0002003 (angiotensin maturation), GO:0021903 (rostrocaudal neural tube patterning), GO:0030177 (positive regulation of Wnt signaling pathway), GO:0032914 (positive regulation of transforming growth factor beta1 production), GO:0043312 (neutrophil degranulation), GO:0043408 (regulation of MAPK cascade), GO:0048069 (eye pigmentation), GO:0060323 (head morphog…			0.419221	0.50136		-0.305499	-0.250333	-0.364748				512.524	87.1476	53.833	-0.780059	6.85675	85.399	8.90697e-06	0.000714151	2.56774e-13	2.66596e-13	0.2	0.354767	0.0172418	-0.866025	-0.993438	0.0576689	0.000637437		149.904	158.803	89.9192	93.5021	86.2208
ENSG00000070756	PABPC1	PC	poly(A) binding protein cytoplasmic 1	This gene encodes a poly(A) binding protein. The protein shuttles between the nucleus and cytoplasm and binds to the 3_ poly(A) tail of eukaryotic messenger RNAs via RNA-recognition motifs. The binding of this protein to poly(A) promotes ribosome recruitment and translation initiation; it is also required for poly(A) shortening which is the first step in mRNA decay. The gene is part of a small ge…	hsa03013 (RNA transport), hsa03015 (mRNA surveillance pathway), hsa03018 (RNA degradation), GO:0000184 (nuclear-transcribed mRNA catabolic process, nonsense-mediated decay), GO:0000289 (nuclear-transcribed mRNA poly(A) tail shortening), GO:0000398 (mRNA splicing, via spliceosome), GO:0006378 (mRNA polyadenylation), GO:0006413 (translational initiation), GO:0031047 (gene silencing by RNA), GO:0043…			0.391882	0.435127		-0.308263	-0.246446	-0.2723				512.467	99.5145	21.6354	-0.689915	10.7223	85.3842	8.91309e-06	0.000714151	1.20349e-12	1.19531e-12	0.2	0.354767	0.00628262	-0.866025	-0.997685	0.0576689	0.000133694		2155.4	2221.05	1325.9	1384.04	1359.42
ENSG00000167460	TPM4	PC	tropomyosin 4	This gene encodes a member of the tropomyosin family of actin-binding proteins involved in the contractile system of striated and smooth muscles and the cytoskeleton of non-muscle cells. Tropomyosins are dimers of coiled-coil proteins that polymerize end-to-end along the major groove in most actin filaments. They provide stability to the filaments and regulate access of other actin-binding protei…	hsa04260 (Cardiac muscle contraction), hsa04261 (Adrenergic signaling in cardiomyocytes), hsa05410 (Hypertrophic cardiomyopathy (HCM)), hsa05414 (Dilated cardiomyopathy (DCM)), GO:0001649 (osteoblast differentiation), GO:0006928 (cellular component movement), GO:0006936 (muscle contraction), GO:0007015 (actin filament organization), GO:0030049 (muscle filament sliding), GO:0001725 (stress fiber),…			0.481988	0.369606		-0.245696	-0.285416	-0.320481				511.667	98.8757	18.7053	-0.711879	9.91532	85.177	8.99951e-06	0.000714151	4.35988e-13	4.3434e-13	0.2	0.354767	0.0518374	-0.866025	-0.990402	0.0576689	0.00112717		1308.91	1210.67	789.625	768.128	749.635
ENSG00000172167	MTBP	PC	MDM2 binding protein	This gene encodes a protein that interacts with the oncoprotein mouse double minute 2. The encoded protein regulates progression through the cell cycle and may be involved in tumor formation. [provided by RefSeq, Aug 2012].	GO:0007050 (cell cycle arrest), GO:0007089 (traversing start control point of mitotic cell cycle), GO:0008285 (negative regulation of cell proliferation), GO:0034501 (protein localization to kinetochore), GO:0045839 (negative regulation of mitosis), GO:0000776 (kinetochore), GO:0000785 (chromatin)			0.662209	1.02512		-0.580522	-0.526282	-0.580522				511.636	40.6354	50.2726	-1.64745	3.7573	83.488	9.74374e-06	0.000731621	1.15815e-13	1.42781e-13	0.138641	0.354767	0.125237	-0.888523	-0.968117	0.043925	0.00680131		19.417	25.5426	7.05022	7.39695	7.05022
ENSG00000136999	NOV	PC	nephroblastoma overexpressed	The protein encoded by this gene is a small secreted cysteine-rich protein and a member of the CCN family of regulatory proteins. CNN family proteins associate with the extracellular matrix and play an important role in cardiovascular and skeletal development, fibrosis and cancer development. [provided by RefSeq, Feb 2009]. Publication Note: This RefSeq record includes a subset of the publication…	GO:0001525 (angiogenesis), GO:0002062 (chondrocyte differentiation), GO:0010468 (regulation of gene expression), GO:0010761 (fibroblast migration), GO:0010832 (negative regulation of myotube differentiation), GO:0014909 (smooth muscle cell migration), GO:0030308 (negative regulation of cell growth), GO:0033627 (cell adhesion mediated by integrin), GO:0035767 (endothelial cell chemotaxis), GO:0042…			0.755554	0.877716		-0.821511	-0.483919	-0.32784				511.273	64.1768	55.3322	-1.43021	5.11671	85.0749	9.04246e-06	0.000714151	2.2512e-16	2.53045e-16	0.2	0.354767	0.00394152	-0.866025	-0.986271	0.0576689	0.00192708		52.9345	57.7887	16.412	21.2662	23.9245
ENSG00000173409	ARV1	PC	ARV1 homolog, fatty acid homeostasis modulator		GO:0006695 (cholesterol biosynthetic process), GO:0008206 (bile acid metabolic process), GO:0030301 (cholesterol transport), GO:0032383 (regulation of intracellular cholesterol transport), GO:0090181 (regulation of cholesterol metabolic process), GO:0005789 (endoplasmic reticulum membrane), GO:0016021 (integral component of membrane), GO:0015248 (sterol transporter activity), R-HSA-1430728 (Homo …			0.601814	0.506847		-0.313672	-0.42046	-0.374529				511.085	66.5957	28.2538	-0.972207	5.26631	85.0263	9.06299e-06	0.000714151	3.49098e-13	3.8252e-13	0.2	0.354767	0.0264887	-0.866025	-0.994578	0.0576689	0.000478855		56.055	52.3566	28.7788	26.5828	27.5074
ENSG00000145287	PLAC8	PC	placenta specific 8		GO:0008284 (positive regulation of cell proliferation), GO:0009409 (response to cold), GO:0040015 (negative regulation of multicellular organism growth), GO:0042742 (defense response to bacterium), GO:0043066 (negative regulation of apoptotic process), GO:0043312 (neutrophil degranulation), GO:0045944 (positive regulation of transcription from RNA polymerase II promoter), GO:0050873 (brown fat ce…			0.558335	0.38818		-0.379337	-0.258971	-0.308207				510.178	95.5626	27.6746	-0.79567	8.21886	84.792	9.16283e-06	0.000717205	8.69793e-14	8.75658e-14	0.2	0.354767	0.0745837	-0.866025	-0.981542	0.0576689	0.00300189		422.898	375.627	219.828	239.13	231.039
ENSG00000133773	CCDC59	PC	coiled-coil domain containing 59		GO:0006351 (transcription, DNA-templated), GO:0006355 (regulation of transcription, DNA-templated), GO:0044267 (cellular protein metabolic process), GO:0005654 (nucleoplasm), GO:0003723 (RNA binding), GO:0005515 (protein binding), R-HSA-1643685 (Homo sapiens: Disease), R-HSA-392499 (Homo sapiens: Metabolism of proteins), R-HSA-5668914 (Homo sapiens: Diseases of metabolism), R-HSA-5683826 (Homo sa…			0.629715	0.489333		-0.303496	-0.317561	-0.49799				508.288	76.2201	24.506	-0.962553	5.91262	84.3042	9.375e-06	0.000728953	4.0742e-14	4.17059e-14	0.2	0.354767	0.0317147	-0.866025	-0.986122	0.0576689	0.00195855		88.9946	80.5575	45.6531	45.1908	39.6431
ENSG00000147224	PRPS1	PC	phosphoribosyl pyrophosphate synthetase 1	This gene encodes an enzyme that catalyzes the phosphoribosylation of ribose 5-phosphate to 5-phosphoribosyl-1-pyrophosphate, which is necessary for purine metabolism and nucleotide biosynthesis. Defects in this gene are a cause of phosphoribosylpyrophosphate synthetase superactivity, Charcot-Marie-Tooth disease X-linked recessive type 5 and Arts Syndrome. Two transcript variants encoding differe…	hsa00030 (Pentose phosphate pathway), hsa00230 (Purine metabolism), hsa01100 (Metabolic pathways), hsa01200 (Carbon metabolism), hsa01230 (Biosynthesis of amino acids), GO:0006015 (5-phosphoribose 1-diphosphate biosynthetic process), GO:0006144 (purine nucleobase metabolic process), GO:0006164 (purine nucleotide biosynthetic process), GO:0006167 (AMP biosynthetic process), GO:0006221 (pyrimidine …			0.549572	0.385332		-0.334928	-0.327203	-0.272773				507.341	89.2258	45.3748	-0.792263	7.11983	84.06	9.48348e-06	0.000731621	2.20328e-13	2.26267e-13	0.2	0.354767	0.0809827	-0.866025	-0.984075	0.0576689	0.00240666		196.713	175.331	105.638	106.216	110.376
ENSG00000273841	TAF9	PC	TATA-box binding protein associated factor 9	Initiation of transcription by RNA polymerase II requires the activities of more than 70 polypeptides. The protein that coordinates these activities is transcription factor IID (TFIID), which binds to the core promoter to position the polymerase properly, serves as the scaffold for assembly of the remainder of the transcription complex, and acts as a channel for regulatory signals. TFIID is compo…	hsa03022 (Basal transcription factors), GO:0000492 (box C/D snoRNP assembly), GO:0006366 (transcription from RNA polymerase II promoter), GO:0006367 (transcription initiation from RNA polymerase II promoter), GO:0006368 (transcription elongation from RNA polymerase II promoter), GO:0006974 (cellular response to DNA damage stimulus), GO:0030307 (positive regulation of cell growth), GO:0032435 (neg…			0.471797	0.760435		-0.442008	-0.267541	-0.522683				505.948	91.4317	24.1227	-1.04246	7.39175	83.7015	9.64556e-06	0.000731621	2.08363e-15	2.06647e-15	0.2	0.354767	0.104751	-0.866025	-0.963808	0.0576689	0.00822011		218.21	266.984	114.884	129.909	108.527
ENSG00000103342	GSPT1	PC	G1 to S phase transition 1		hsa03015 (mRNA surveillance pathway), GO:0000082 (G1/S transition of mitotic cell cycle), GO:0000184 (nuclear-transcribed mRNA catabolic process, nonsense-mediated decay), GO:0002184 (cytoplasmic translational termination), GO:0006415 (translational termination), GO:0006479 (protein methylation), GO:0005622 (intracellular), GO:0005829 (cytosol), GO:0018444 (translation release factor complex), GO…			1.04813	0.495042		-0.498656	-0.465253	-0.579266				504.723	92.6241	66.6695	-1.32571	7.59014	83.3868	9.79068e-06	0.000731621	1.14612e-16	1.11837e-16	0.2	0.354767	0.194763	-0.866025	-0.924945	0.0576689	0.0244033		358.406	243.637	121.356	124.246	114.653
ENSG00000164172	MOCS2	PC	molybdenum cofactor synthesis 2	Eukaryotic molybdoenzymes use a unique molybdenum cofactor (MoCo) consisting of a pterin, termed molybdopterin, and the catalytically active metal molybdenum. MoCo is synthesized from precursor Z by the heterodimeric enzyme molybdopterin synthase. The large and small subunits of molybdopterin synthase are both encoded from this gene by overlapping open reading frames. The proteins were initially …	hsa00790 (Folate biosynthesis), hsa01100 (Metabolic pathways), hsa04122 (Sulfur relay system), GO:0006777 (Mo-molybdopterin cofactor biosynthetic process), GO:0032324 (molybdopterin cofactor biosynthetic process), GO:0005634 (nucleus), GO:0005829 (cytosol), GO:0016607 (nuclear speck), GO:0019008 (molybdopterin synthase complex), GO:0030366 (molybdopterin synthase activity), R-HSA-1430728 (Homo sa…			0.60144	0.42716		-0.402077	-0.258011	-0.368512				504.689	82.855	53.5605	-0.878229	6.43383	83.3781	9.79475e-06	0.000731621	9.78788e-14	1.00859e-13	0.2	0.354767	0.0670882	-0.866025	-0.981904	0.0576689	0.00291418		125.979	111.417	61.8339	68.5374	63.3364
ENSG00000057608	GDI2	PC	GDP dissociation inhibitor 2	GDP dissociation inhibitors are proteins that regulate the GDP-GTP exchange reaction of members of the rab family, small GTP-binding proteins of the ras superfamily, that are involved in vesicular trafficking of molecules between cellular organelles. GDIs slow the rate of dissociation of GDP from rab proteins and release GDP from membrane-bound rabs. GDI2 is ubiquitously expressed. The GDI2 gene …	GO:0007165 (signal transduction), GO:0007264 (small GTPase mediated signal transduction), GO:0015031 (protein transport), GO:0043312 (neutrophil degranulation), GO:0043547 (positive regulation of GTPase activity), GO:0051056 (regulation of small GTPase mediated signal transduction), GO:0055114 (oxidation-reduction process), GO:0061024 (membrane organization), GO:0005576 (extracellular region), GO…			0.604916	0.383477		-0.308932	-0.314849	-0.364612				504.265	89.7198	34.9574	-0.839078	7.17118	83.2694	9.84551e-06	0.000731621	1.00503e-13	1.02356e-13	0.2	0.354767	0.108256	-0.866025	-0.974724	0.0576689	0.00480552		210.813	180.532	110.954	110.492	106.678
ENSG00000122033	MTIF3	PC	mitochondrial translational initiation factor 3	This gene encodes a translation initiation factor that is involved in mitochondrial protein synthesis. Polymorphism in this gene is associated with the onset of Parkinson_s disease. Alternate splicing results in multiple transcript variants. A pseudogene of this gene is found on chromosome 5. [provided by RefSeq, Oct 2009].	GO:0032790 (ribosome disassembly), GO:0070124 (mitochondrial translational initiation), GO:0005739 (mitochondrion), GO:0003743 (translation initiation factor activity), GO:0005515 (protein binding), GO:0008135 (translation factor activity, nucleic acid binding), GO:0043024 (ribosomal small subunit binding), R-HSA-1852241 (Homo sapiens: Organelle biogenesis and maintenance), R-HSA-5368286 (Homo sa…			0.888484	0.460128		-0.411823	-0.495601	-0.441188				503.326	81.7222	11.2181	-1.16799	6.3402	83.0285	9.95919e-06	0.000735407	2.08246e-15	2.01082e-15	0.2	0.354767	0.166989	-0.866025	-0.943894	0.0576689	0.0158181		139.271	102.979	55.3616	52.1254	54.2058
ENSG00000136536	MARCH7	PC	membrane associated ring-CH-type finger 7	MARCH7 is a member of the MARCH family of membrane-bound E3 ubiquitin ligases (EC 6.3.2.19). MARCH proteins add ubiquitin (see MIM 191339) to target lysines in substrate proteins, thereby signaling their vesicular transport between membrane compartments (Bartee et al., 2004 [PubMed 14722266]).[supplied by OMIM, Mar 2010].	GO:0002643 (regulation of tolerance induction), GO:0016567 (protein ubiquitination), GO:0042130 (negative regulation of T cell proliferation), GO:0008270 (zinc ion binding), GO:0016740 (transferase activity)			0.556794	0.675444		-0.563584	-0.272421	-0.396233				502.31	71.1609	70.8262	-1.06713	5.55794	82.7682	1.00838e-05	0.000735407	2.29357e-14	2.48194e-14	0.2	0.354767	0.0101057	-0.866025	-0.986925	0.0576689	0.0017912		65.4168	71.1957	29.0099	35.9446	32.824
ENSG00000165629	ATP5F1C	PC	ATP synthase F1 subunit gamma	This gene encodes a subunit of mitochondrial ATP synthase. Mitochondrial ATP synthase catalyzes ATP synthesis, utilizing an electrochemical gradient of protons across the inner membrane during oxidative phosphorylation. ATP synthase is composed of two linked multi-subunit complexes: the soluble catalytic core, F1, and the membrane-spanning component, Fo, comprising the proton channel. The catalyt…	hsa00190 (Oxidative phosphorylation), hsa01100 (Metabolic pathways), hsa04714 (Thermogenesis), hsa05010 (Alzheimer disease), hsa05012 (Parkinson disease), hsa05016 (Huntington disease), GO:0006119 (oxidative phosphorylation), GO:0006754 (ATP biosynthetic process), GO:0042776 (mitochondrial ATP synthesis coupled proton transport), GO:0099132 (NA), GO:0000275 (mitochondrial proton-transporting ATP …			0.702182	0.397105		-0.41386	-0.30937	-0.376058				502.305	94.4638	9.91482	-0.930873	7.95973	82.7671	1.00844e-05	0.000735407	1.43944e-14	1.43947e-14	0.2	0.354767	0.136152	-0.866025	-0.959783	0.0576689	0.00962292		384.873	311.134	176.487	189.894	181.225
ENSG00000139168	ZCRB1	PC	zinc finger CCHC-type and RNA binding motif containing 1	Pre-mRNA splicing is catalyzed by the spliceosome. U12-type spliceosome binds U12-type pre-mRNAs and recognizes the 5_ splice site and branch-point sequence. U11 and U12 snRNPs are components of U12-type spliceosome and function as a molecular bridge connecting both ends of the intron. The protein encoded by this gene contains a RNA recognition motif. It was identified as one of the protein compo…	GO:0000398 (mRNA splicing, via spliceosome), GO:0008380 (RNA splicing), GO:0005654 (nucleoplasm), GO:0005689 (U12-type spliceosomal complex), GO:0003723 (RNA binding), GO:0008270 (zinc ion binding), R-HSA-72165 (Homo sapiens: mRNA Splicing - Minor Pathway), R-HSA-72172 (Homo sapiens: mRNA Splicing), R-HSA-72203 (Homo sapiens: Processing of Capped Intron-Containing Pre-mRNA), R-HSA-74160 (Homo sap…			0.670003	0.400264		-0.283237	-0.405231	-0.381799				500.423	91.7809	16.201	-0.907416	7.45184	82.2858	1.032e-05	0.000745341	2.83579e-14	2.85166e-14	0.2	0.354767	0.119844	-0.866025	-0.965772	0.0576689	0.00756263		265.712	220.059	136.266	125.055	127.135
ENSG00000111845	PAK1IP1	PC	PAK1 interacting protein 1		GO:0008283 (cell proliferation), GO:0009968 (negative regulation of signal transduction), GO:0060021 (palate development), GO:0005730 (nucleolus), GO:0005515 (protein binding)			0.697624	0.42438		-0.334939	-0.413418	-0.373645				500.206	78.5197	66.8484	-0.968839	6.08758	82.2303	1.03475e-05	0.000745341	6.91474e-14	7.02608e-14	0.2	0.354767	0.121628	-0.866025	-0.968473	0.0576689	0.00668802		105.175	86.6831	50.3918	47.6179	49.0048
ENSG00000005175	RPAP3	PC	RNA polymerase II associated protein 3	This gene encodes an RNA polymerase II-associated protein. The encoded protein may function in transcriptional regulation and may also regulate apoptosis. Alternatively spliced transcript variants have been described. [provided by RefSeq, Mar 2009].	GO:0097255 (R2TP complex), GO:0005515 (protein binding)			0.480459	0.672975		-0.405013	-0.362	-0.386421				499.313	64.8923	56.0562	-1.01881	5.15653	82.0024	1.04619e-05	0.000748033	6.13696e-13	6.7421e-13	0.2	0.354767	0.0852858	-0.866025	-0.984592	0.0576689	0.00229063		47.3867	54.437	24.7336	25.5426	25.0803
ENSG00000136830	FAM129B	PC	family with sequence similarity 129 member B		GO:0007411 (axon guidance), GO:0008285 (negative regulation of cell proliferation), GO:0016525 (negative regulation of angiogenesis), GO:0030154 (cell differentiation), GO:0030948 (negative regulation of vascular endothelial growth factor receptor signaling pathway), GO:0032274 (gonadotropin secretion), GO:0034337 (RNA folding), GO:0040019 (positive regulation of embryonic development), GO:004306…			-0.435697	-0.427812		0.30392	0.252831	0.306758				498.922	89.7879	53.1005	0.730603	7.17994	81.9027	1.05124e-05	0.000748033	2.27129e-12	2.00387e-12	0.2	0.354767	0.000778685	0.866025	0.997633	0.0576689	0.00013822		103.442	104.02	174.06	167.934	174.406
ENSG00000178397	FAM220A	PC	family with sequence similarity 220 member A		GO:0000122 (negative regulation of transcription from RNA polymerase II promoter), GO:0006470 (protein dephosphorylation), GO:0032092 (positive regulation of protein binding), GO:0005634 (nucleus), GO:0097677 (NA)			0.727172	1.28671		-0.650296	-0.681794	-0.681794				498.549	27.8852	26.6354	-2.20951	3.04882	80.1949	1.14256e-05	0.000793777	5.72338e-14	7.9223e-14	0.138641	0.354767	0.171545	-0.888523	-0.94187	0.043925	0.0166767		11.9045	18.4924	3.35175	3.23617	3.23617
ENSG00000129084	PSMA1	PC	proteasome subunit alpha 1	The proteasome is a multicatalytic proteinase complex with a highly ordered ring-shaped 20S core structure. The core structure is composed of 4 rings of 28 non-identical subunits; 2 rings are composed of 7 alpha subunits and 2 rings are composed of 7 beta subunits. Proteasomes are distributed throughout eukaryotic cells at a high concentration and cleave peptides in an ATP/ubiquitin-dependent pro…	hsa03050 (Proteasome), GO:0000165 (MAPK cascade), GO:0000209 (protein polyubiquitination), GO:0002223 (stimulatory C-type lectin receptor signaling pathway), GO:0002479 (antigen processing and presentation of exogenous peptide antigen via MHC class I, TAP-dependent), GO:0006521 (regulation of cellular amino acid metabolic process), GO:0010972 (negative regulation of G2/M transition of mitotic cel…			0.449086	0.685262		-0.520635	-0.297882	-0.315831				497.685	91.4658	15.1789	-0.957883	7.39532	81.5874	1.0674e-05	0.000753506	1.27779e-14	1.27889e-14	0.2	0.354767	0.0839237	-0.866025	-0.970571	0.0576689	0.00603365		217.632	256.697	110.145	128.869	127.251
ENSG00000147669	POLR2K	PC	RNA polymerase II subunit K	This gene encodes one of the smallest subunits of RNA polymerase II, the polymerase responsible for synthesizing messenger RNA in eukaryotes. This subunit is shared by the other two DNA-directed RNA polymerases. [provided by RefSeq, Jul 2008]. Publication Note: This RefSeq record includes a subset of the publications that are available for this gene. Please see the Gene record to access additiona…	hsa01100 (Metabolic pathways), hsa03020 (RNA polymerase), hsa04623 (Cytosolic DNA-sensing pathway), hsa05016 (Huntington disease), GO:0000398 (mRNA splicing, via spliceosome), GO:0006283 (transcription-coupled nucleotide-excision repair), GO:0006356 (regulation of transcription from RNA polymerase I promoter), GO:0006361 (transcription initiation from RNA polymerase I promoter), GO:0006362 (trans…			0.58678	0.396979		-0.388379	-0.335569	-0.259812				497.354	88.7829	15.8688	-0.834154	7.06111	81.5034	1.07176e-05	0.000753506	1.6927e-13	1.72877e-13	0.2	0.354767	0.0827918	-0.866025	-0.978778	0.0576689	0.00369942		193.014	168.974	97.2006	100.899	106.447
ENSG00000134480	CCNH	PC	cyclin H	The protein encoded by this gene belongs to the highly conserved cyclin family, whose members are characterized by a dramatic periodicity in protein abundance through the cell cycle. Cyclins function as regulators of CDK kinases. Different cyclins exhibit distinct expression and degradation patterns which contribute to the temporal coordination of each mitotic event. This cyclin forms a complex w…	hsa03022 (Basal transcription factors), hsa03420 (Nucleotide excision repair), hsa04110 (Cell cycle), GO:0000082 (G1/S transition of mitotic cell cycle), GO:0000086 (G2/M transition of mitotic cell cycle), GO:0006283 (transcription-coupled nucleotide-excision repair), GO:0006294 (nucleotide-excision repair, preincision complex assembly), GO:0006361 (transcription initiation from RNA polymerase I …			0.712665	0.393859		-0.405206	-0.363489	-0.337829				493.847	89.9242	28.6201	-0.943282	7.19845	80.6126	1.11935e-05	0.00078228	3.20762e-14	3.22022e-14	0.2	0.354767	0.143536	-0.866025	-0.957636	0.0576689	0.0104004		228.843	183.075	104.366	107.487	109.452
ENSG00000226532	AL022718.1	p_Pg						1.18402	0.575431		-0.658857	-0.504233	-0.596364				491.651	67.984	0.417376	-1.57577	5.35698	80.0569	1.15036e-05	0.000794494	8.53989e-16	9.45924e-16	0.2	0.354767	0.197407	-0.866025	-0.922843	0.0576689	0.0254279		82.2911	53.2812	21.4974	24.1557	22.5376
ENSG00000065548	ZC3H15	PC	zinc finger CCCH-type containing 15		GO:0019221 (cytokine-mediated signaling pathway), GO:0005730 (nucleolus), GO:0005829 (cytosol), GO:0003723 (RNA binding), GO:0005515 (protein binding), GO:0045296 (cadherin binding), GO:0046872 (metal ion binding)			0.427031	0.752663		-0.352895	-0.433947	-0.392852				490.522	78.2387	14.6763	-1.0216	6.06933	79.7718	1.16669e-05	0.000801056	6.20348e-14	6.21858e-14	0.2	0.354767	0.139914	-0.866025	-0.959369	0.0576689	0.00977147		85.1806	107.256	48.7737	45.9998	47.3867
ENSG00000076043	REXO2	PC	RNA exonuclease 2	This gene encodes a 3_-to-5_ exonuclease specific for small (primarily 5 nucleotides or less in length) single-stranded RNA and DNA oligomers. This protein may have a role in DNA repair, replication, and recombination, and in RNA processing and degradation. It may also be involved in resistance of human cells to UV-C-induced cell death through its role in the DNA repair process. [provided by RefS…	hsa03008 (Ribosome biogenesis in eukaryotes), GO:0006139 (nucleobase-containing compound metabolic process), GO:0009117 (nucleotide metabolic process), GO:0090305 (nucleic acid phosphodiester bond hydrolysis), GO:0005634 (nucleus), GO:0005730 (nucleolus), GO:0005739 (mitochondrion), GO:0005758 (mitochondrial intermembrane space), GO:0005759 (mitochondrial matrix), GO:0005925 (focal adhesion), GO:…			0.784026	0.426366		-0.336155	-0.489857	-0.38438				488.629	88.1015	10.9881	-1.03456	6.97863	79.2944	1.19465e-05	0.000812766	1.41829e-14	1.40965e-14	0.2	0.354767	0.147403	-0.866025	-0.95195	0.0576689	0.0125521		204.341	159.035	92.9242	83.3313	89.8037
ENSG00000163002	NUP35	PC	nucleoporin 35	This gene encodes a member of the nucleoporin family. The encoded protein contains two membrane binding regions, is localized to the nuclear rim, and is part of the nuclear pore complex. All molecules entering or leaving the nucleus either diffuse through or are actively transported by the nuclear pore complex. Alternative splicing results in multiple transcript variants. Pseudogenes of this gene…	hsa03013 (RNA transport), GO:0006355 (regulation of transcription, DNA-templated), GO:0006406 (mRNA export from nucleus), GO:0006409 (tRNA export from nucleus), GO:0006607 (NLS-bearing protein import into nucleus), GO:0006999 (nuclear pore organization), GO:0007077 (mitotic nuclear envelope disassembly), GO:0010827 (regulation of glucose transport), GO:0016032 (viral process), GO:0016925 (protein…			0.667641	0.532043		-0.478642	-0.386181	-0.334862				488.433	60.0801	24.9489	-1.06945	4.86992	79.2452	1.19758e-05	0.000812766	1.3451e-12	1.49975e-12	0.2	0.354767	0.0417447	-0.866025	-0.990687	0.0576689	0.00107728		44.3817	40.2209	18.9547	20.3416	21.1507
ENSG00000164815	ORC5	PC	origin recognition complex subunit 5	The origin recognition complex (ORC) is a highly conserved six subunit protein complex essential for the initiation of the DNA replication in eukaryotic cells. Studies in yeast demonstrated that ORC binds specifically to origins of replication and serves as a platform for the assembly of additional initiation factors such as Cdc6 and Mcm proteins. The protein encoded by this gene is a subunit of …	hsa04110 (Cell cycle), GO:0000082 (G1/S transition of mitotic cell cycle), GO:0006260 (DNA replication), GO:0006270 (DNA replication initiation), GO:0000784 (nuclear chromosome, telomeric region), GO:0000808 (origin recognition complex), GO:0005634 (nucleus), GO:0005654 (nucleoplasm), GO:0005664 (nuclear origin of replication recognition complex), GO:0005829 (cytosol), GO:0000166 (nucleotide bind…			0.518945	0.549299		-0.345578	-0.431887	-0.290779				484.336	66.3487	30.6644	-0.935967	5.248	78.2161	1.26093e-05	0.000846044	2.55958e-12	2.79494e-12	0.2	0.354767	0.000144472	-0.866025	-0.99682	0.0576689	0.000215157		52.3566	53.5123	27.8542	26.1205	29.0099
ENSG00000164924	YWHAZ	PC	tyrosine 3-monooxygenase/tryptophan 5-monooxygenase activation protein zeta	This gene product belongs to the 14-3-3 family of proteins which mediate signal transduction by binding to phosphoserine-containing proteins. This highly conserved protein family is found in both plants and mammals, and this protein is 99% identical to the mouse, rat and sheep orthologs. The encoded protein interacts with IRS1 protein, suggesting a role in regulating insulin sensitivity. Several …	hsa04110 (Cell cycle), hsa04114 (Oocyte meiosis), hsa04151 (PI3K-Akt signaling pathway), hsa04390 (Hippo signaling pathway), hsa05130 (Pathogenic Escherichia coli infection), hsa05160 (Hepatitis C), hsa05161 (Hepatitis B), hsa05203 (Viral carcinogenesis), GO:0006605 (protein targeting), GO:0007165 (signal transduction), GO:0030168 (platelet activation), GO:0043066 (negative regulation of apoptoti…			0.495857	1.0172		-0.56311	-0.361589	-0.588353				483.931	95.7499	52.4191	-1.28939	8.25008	78.1147	1.2674e-05	0.000846044	8.70404e-16	8.63947e-16	0.2	0.354767	0.183594	-0.866025	-0.928426	0.0576689	0.0227378		386.722	555.927	184.577	212.547	181.341
ENSG00000108854	SMURF2	PC	SMAD specific E3 ubiquitin protein ligase 2		hsa04120 (Ubiquitin mediated proteolysis), hsa04144 (Endocytosis), hsa04340 (Hedgehog signaling pathway), hsa04350 (TGF-beta signaling pathway), GO:0000122 (negative regulation of transcription from RNA polymerase II promoter), GO:0000209 (protein polyubiquitination), GO:0006511 (ubiquitin-dependent protein catabolic process), GO:0016579 (protein deubiquitination), GO:0017015 (regulation of trans…			0.52498	0.471799		-0.243776	-0.319343	-0.433661				483.878	77.6595	77.8279	-0.854008	6.02955	78.1016	1.26824e-05	0.000846044	9.61478e-13	1.01063e-12	0.2	0.354767	0.000720744	-0.866025	-0.992614	0.0576689	0.000761185		90.6127	87.261	52.3566	49.5827	45.6531
ENSG00000186635	ARAP1	PC	ArfGAP with RhoGAP domain, ankyrin repeat and PH domain 1	The protein encoded by this gene contains SAM, ARF-GAP, RHO-GAP, ankyrin repeat, RAS-associating, and pleckstrin homology (PH) domains. In vitro, this protein displays RHO-GAP and phosphatidylinositol (3,4,5) trisphosphate (PIP3)-dependent ARF-GAP activity. The encoded protein associates with the Golgi, and the ARF-GAP activity mediates changes in the Golgi and the formation of filopodia. It is t…	hsa04144 (Endocytosis), GO:0001921 (positive regulation of receptor recycling), GO:0007165 (signal transduction), GO:0008360 (regulation of cell shape), GO:0030037 (actin filament reorganization involved in cell cycle), GO:0043547 (positive regulation of GTPase activity), GO:0045742 (positive regulation of epidermal growth factor receptor signaling pathway), GO:0051056 (regulation of small GTPase…			-0.530204	-0.622173		0.336467	0.40408	0.41183				483.42	62.4734	79.2078	1.02869	5.01518	77.9868	1.27561e-05	0.000846153	4.19561e-12	5.09727e-12	0.2	0.354767	0.000483548	0.866025	0.996208	0.0576689	0.000280152		20.4572	19.0703	38.9496	40.9144	41.1456
ENSG00000189050	RNFT1	PC	ring finger protein, transmembrane 1		GO:0016021 (integral component of membrane), GO:0008270 (zinc ion binding)			0.770514	0.83403		-0.498744	-0.498744	-0.607056				483.203	27.8852	36.7802	-1.69503	3.04882	76.398	1.38327e-05	0.000873168	1.49734e-12	2.00154e-12	0.138641	0.354767	0.00777416	-0.888523	-0.998243	0.043925	8.84142e-05		13.407	14.1004	4.39194	4.39194	3.92963
ENSG00000284292	AC004922.1	PC						-0.856271	-0.587477		0.437342	0.548255	0.458152				482.953	54.825	75.2215	1.32317	4.56359	77.8701	1.28316e-05	0.00084638	3.25107e-13	4.20968e-13	0.2	0.354767	0.0118945	0.866025	0.991356	0.0576689	0.000963456		10.9799	13.6381	29.819	32.3617	30.2813
ENSG00000108468	CBX1	PC	chromobox 1	This gene encodes a highly conserved nonhistone protein, which is a member of the heterochromatin protein family . The protein is enriched in the heterochromatin and associated with centromeres. The protein has a single N-terminal chromodomain which can bind to histone proteins via methylated lysine residues, and a C-terminal chromo shadow-domain (CSD) which is responsible for the homodimerizatio…	GO:0045892 (negative regulation of transcription, DNA-templated), GO:0000775 (chromosome, centromeric region), GO:0000784 (nuclear chromosome, telomeric region), GO:0000785 (chromatin), GO:0001939 (female pronucleus), GO:0001940 (male pronucleus), GO:0005654 (nucleoplasm), GO:0005720 (nuclear heterochromatin), GO:0005721 (pericentric heterochromatin), GO:0005819 (spindle), GO:0010369 (chromocente…			0.359863	0.534643		-0.334436	-0.318532	-0.241539				482.338	96.2184	35.971	-0.751851	8.40194	77.7162	1.2932e-05	0.000847171	1.0916e-12	1.09803e-12	0.2	0.354767	0.0844272	-0.866025	-0.979793	0.0576689	0.00343763		419.777	474.099	258.662	261.552	275.999
ENSG00000068366	ACSL4	PC	acyl-CoA synthetase long chain family member 4	The protein encoded by this gene is an isozyme of the long-chain fatty-acid-coenzyme A ligase family. Although differing in substrate specificity, subcellular localization, and tissue distribution, all isozymes of this family convert free long-chain fatty acids into fatty acyl-CoA esters, and thereby play a key role in lipid biosynthesis and fatty acid degradation. This isozyme preferentially uti…	hsa00061 (Fatty acid biosynthesis), hsa00071 (Fatty acid degradation), hsa01100 (Metabolic pathways), hsa01212 (Fatty acid metabolism), hsa03320 (PPAR signaling pathway), hsa04146 (Peroxisome), hsa04216 (Ferroptosis), hsa04714 (Thermogenesis), hsa04920 (Adipocytokine signaling pathway), GO:0001676 (long-chain fatty acid metabolic process), GO:0006629 (lipid metabolic process), GO:0006641 (triglyc…			0.488447	0.453834		-0.371679	-0.327525	-0.243077				481.353	77.0292	64.6337	-0.808975	5.98022	77.4702	1.30944e-05	0.000847171	3.72293e-12	3.96679e-12	0.2	0.354767	0.000232492	-0.866025	-0.996023	0.0576689	0.000300852		85.7584	83.6781	46.3465	47.8491	50.8541
ENSG00000063046	EIF4B	PC	eukaryotic translation initiation factor 4B		hsa03013 (RNA transport), hsa04150 (mTOR signaling pathway), hsa04151 (PI3K-Akt signaling pathway), hsa05205 (Proteoglycans in cancer), GO:0000289 (nuclear-transcribed mRNA poly(A) tail shortening), GO:0001731 (formation of translation preinitiation complex), GO:0002181 (cytoplasmic translation), GO:0006413 (translational initiation), GO:0006446 (regulation of translational initiation), GO:009701…			0.430253	0.517876		-0.376331	-0.228936	-0.342863				481.262	81.0663	41.3288	-0.809465	6.28311	77.4475	1.31096e-05	0.000847171	1.80765e-12	1.89876e-12	0.2	0.354767	0.0116071	-0.866025	-0.99118	0.0576689	0.00099311		101.361	107.834	57.0952	63.452	58.4822
ENSG00000092108	SCFD1	PC	sec1 family domain containing 1		GO:0000902 (cell morphogenesis), GO:0001666 (response to hypoxia), GO:0006890 (retrograde vesicle-mediated transport, Golgi to ER), GO:0006892 (post-Golgi vesicle-mediated transport), GO:0006904 (vesicle docking involved in exocytosis), GO:0006909 (phagocytosis), GO:0009636 (response to toxic substance), GO:0015031 (protein transport), GO:0048208 (COPII vesicle coating), GO:0051223 (regulation of…			0.584127	0.423977		-0.386865	-0.312524	-0.308716				480.7	74.3037	30.4344	-0.87239	5.77871	77.3073	1.32034e-05	0.000847171	2.26825e-12	2.39536e-12	0.2	0.354767	0.0718203	-0.866025	-0.985975	0.0576689	0.00198957		79.4017	70.849	39.5275	41.7234	41.839
ENSG00000078304	PPP2R5C	PC	protein phosphatase 2 regulatory subunit B'gamma	The product of this gene belongs to the phosphatase 2A regulatory subunit B family. Protein phosphatase 2A is one of the four major Ser/Thr phosphatases, and it is implicated in the negative control of cell growth and division. It consists of a common heteromeric core enzyme, which is composed of a catalytic subunit and a constant regulatory subunit, that associates with a variety of regulatory s…	hsa03015 (mRNA surveillance pathway), hsa04071 (Sphingolipid signaling pathway), hsa04114 (Oocyte meiosis), hsa04151 (PI3K-Akt signaling pathway), hsa04152 (AMPK signaling pathway), hsa04261 (Adrenergic signaling in cardiomyocytes), hsa04728 (Dopaminergic synapse), hsa05165 (Human papillomavirus infection), GO:0007165 (signal transduction), GO:0008285 (negative regulation of cell proliferation), …			0.703581	0.394555		-0.393605	-0.347171	-0.357361				480.694	82.8294	39.0204	-0.944619	6.43151	77.3059	1.32043e-05	0.000847171	1.81446e-13	1.84039e-13	0.2	0.354767	0.140621	-0.866025	-0.959807	0.0576689	0.00961436		134.07	107.834	61.6028	63.6832	63.2208
ENSG00000237765	FAM200B	PC	family with sequence similarity 200 member B		GO:0006357 (regulation of transcription from RNA polymerase II promoter), GO:0005654 (nucleoplasm), GO:0005737 (cytoplasm), GO:0000981 (sequence-specific DNA binding RNA polymerase II transcription factor activity), GO:0003677 (DNA binding)			0.932543	0.537007		-0.6195	-0.472387	-0.377663				478.708	64.1427	26.4395	-1.30896	5.11382	76.8111	1.35424e-05	0.000864136	4.57146e-14	5.04293e-14	0.2	0.354767	0.141317	-0.866025	-0.953509	0.0576689	0.0119492		61.1405	45.9998	19.5326	21.8441	23.4622
ENSG00000155096	AZIN1	PC	antizyme inhibitor 1	The protein encoded by this gene belongs to the antizyme inhibitor family, which plays a role in cell growth and proliferation by maintaining polyamine homeostasis within the cell. Antizyme inhibitors are homologs of ornithine decarboxylase (ODC, the key enzyme in polyamine biosynthesis) that have lost the ability to decarboxylase ornithine; however, retain the ability to bind to antizymes. Antiz…	GO:0006521 (regulation of cellular amino acid metabolic process), GO:0033387 (putrescine biosynthetic process from ornithine), GO:0042177 (negative regulation of protein catabolic process), GO:0043085 (positive regulation of catalytic activity), GO:1902269 (positive regulation of polyamine transmembrane transport), GO:0005634 (nucleus), GO:0005737 (cytoplasm), GO:0005829 (cytosol), GO:0003824 (ca…			0.527075	0.705925		-0.527304	-0.418526	-0.28717				477.451	64.0916	43.2624	-1.08727	5.10997	76.4986	1.37613e-05	0.000873168	5.3829e-13	5.9191e-13	0.2	0.354767	0.0484608	-0.866025	-0.982734	0.0576689	0.00271629		47.04	53.5123	21.613	23.4622	25.8893
ENSG00000164329	TENT2	PC	terminal nucleotidyltransferase 2		GO:0002244 (hematopoietic progenitor cell differentiation), GO:0006397 (mRNA processing), GO:0021766 (hippocampus development), GO:0030182 (neuron differentiation), GO:0043631 (RNA polyadenylation), GO:0060041 (retina development in camera-type eye), GO:0071044 (histone mRNA catabolic process), GO:1990603 (NA), GO:0005829 (cytosol), GO:0031380 (nuclear RNA-directed RNA polymerase complex), GO:000…			0.68207	0.795669		-0.600103	-0.430786	-0.446851				476.615	40.8398	42.5724	-1.42205	3.76957	76.2911	1.39091e-05	0.000873297	2.03284e-12	2.47012e-12	0.2	0.354767	0.0221004	-0.866025	-0.994274	0.0576689	0.000519675		20.5728	22.422	7.28138	8.43715	8.32157
ENSG00000138674	SEC31A	PC	SEC31 homolog A, COPII coat complex component	The protein encoded by this gene is similar to yeast Sec31 protein. Yeast Sec31 protein is known to be a component of the COPII protein complex which is responsible for vesicle budding from endoplasmic reticulum (ER). This protein was found to colocalize with SEC13, one of the other components of COPII , in the subcellular structures corresponding to the vesicle transport function. An immunodeple…	hsa04141 (Protein processing in endoplasmic reticulum), GO:0002474 (antigen processing and presentation of peptide antigen via MHC class I), GO:0006888 (ER to Golgi vesicle-mediated transport), GO:0015031 (protein transport), GO:0019886 (antigen processing and presentation of exogenous peptide antigen via MHC class II), GO:0036498 (NA), GO:0048208 (COPII vesicle coating), GO:0051592 (response to …			0.462079	0.604383		-0.250825	-0.36499	-0.450646				475.789	74.4059	67.0869	-0.920323	5.78478	76.0862	1.40569e-05	0.000877885	9.22209e-13	9.59732e-13	0.2	0.354767	0.0354285	-0.866025	-0.985154	0.0576689	0.00216653		72.6982	80.4419	43.5727	40.1054	37.6782
ENSG00000100442	FKBP3	PC	FK506 binding protein 3	The protein encoded by this gene is a member of the immunophilin protein family, which play a role in immunoregulation and basic cellular processes involving protein folding and trafficking. This encoded protein is a cis-trans prolyl isomerase that binds the immunosuppressants FK506 and rapamycin, as well as histone deacetylases, the transcription factor YY1, casein kinase II, and nucleolin. It h…	GO:0000413 (protein peptidyl-prolyl isomerization), GO:0061077 (chaperone-mediated protein folding), GO:0005634 (nucleus), GO:0005737 (cytoplasm), GO:0003723 (RNA binding), GO:0003755 (peptidyl-prolyl cis-trans isomerase activity), GO:0004872 (receptor activity), GO:0005515 (protein binding), GO:0005528 (FK506 binding)			0.40446	0.38809		-0.270495	-0.298759	-0.223296				473.279	93.0841	29.8807	-0.666483	7.67744	75.4651	1.45171e-05	0.000901829	1.35868e-11	1.39092e-11	0.2	0.354767	7.7156e-05	-0.866025	-0.998067	0.0576689	0.000101957		264.326	261.321	164.813	161.577	170.361
ENSG00000168385	SEPT2	PC	septin 2		hsa05100 (Bacterial invasion of epithelial cells), GO:0007067 (mitotic nuclear division), GO:0007224 (smoothened signaling pathway), GO:0007283 (spermatogenesis), GO:0031175 (neuron projection development), GO:0051301 (cell division), GO:0060271 (cilium morphogenesis), GO:0000145 (exocyst), GO:0000777 (condensed chromosome kinetochore), GO:0005634 (nucleus), GO:0005730 (nucleolus), GO:0005737 (cy…			0.474852	0.420465		-0.21243	-0.40047	-0.282417				472.866	92.0535	25.1704	-0.752456	7.48833	75.3629	1.45946e-05	0.000901869	2.18748e-12	2.23165e-12	0.2	0.354767	0.000963211	-0.866025	-0.990517	0.0576689	0.00110693		241.672	232.657	149.326	130.834	142.16
ENSG00000163171	CDC42EP3	PC	CDC42 effector protein 3	This gene encodes a member of a small family of guanosine triphosphate (GTP) metabolizing proteins that contain a CRIB (Cdc42, Rac interactive binding) domain. Members of this family of proteins act as effectors of CDC42 function. The encoded protein is involved in actin cytoskeleton re-organization during cell shape changes, including pseudopodia formation. A pseudogene of this gene is found on …	GO:0007165 (signal transduction), GO:0007266 (Rho protein signal transduction), GO:0008360 (regulation of cell shape), GO:0030838 (positive regulation of actin filament polymerization), GO:0031274 (positive regulation of pseudopodium assembly), GO:0043547 (positive regulation of GTPase activity), GO:0005737 (cytoplasm), GO:0005829 (cytosol), GO:0005886 (plasma membrane), GO:0012505 (endomembrane …			0.524302	0.433521		-0.304652	-0.339809	-0.313361				468.537	71.3568	88.2879	-0.83223	5.56993	74.2967	1.54341e-05	0.000942817	1.73704e-11	1.87351e-11	0.2	0.354767	0.0435253	-0.866025	-0.99523	0.0576689	0.000395131		66.2259	62.0651	36.4069	35.4823	36.1757
ENSG00000132361	CLUH	PC	clustered mitochondria homolog		GO:0007005 (mitochondrion organization), GO:0048312 (intracellular distribution of mitochondria), GO:0005737 (cytoplasm), GO:0003729 (mRNA binding)			-0.515766	-0.501035		0.299385	0.415228	0.302187				468.402	71.8508	66.5503	0.887625	5.5998	74.2636	1.54611e-05	0.000942817	1.1998e-11	1.39259e-11	0.2	0.354767	0.00331763	0.866025	0.991013	0.0576689	0.00102142		31.7838	32.1305	57.442	62.4118	57.5576
ENSG00000112996	MRPS30	PC	mitochondrial ribosomal protein S30	Mammalian mitochondrial ribosomal proteins are encoded by nuclear genes and help in protein synthesis within the mitochondrion. Mitochondrial ribosomes (mitoribosomes) consist of a small 28S subunit and a large 39S subunit. They have an estimated 75% protein to rRNA composition compared to prokaryotic ribosomes, where this ratio is reversed. Another difference between mammalian mitoribosomes and …	GO:0006915 (apoptotic process), GO:0070125 (mitochondrial translational elongation), GO:0070126 (mitochondrial translational termination), GO:0005743 (mitochondrial inner membrane), GO:0005840 (ribosome), GO:0003723 (RNA binding), GO:0003735 (structural constituent of ribosome), R-HSA-1852241 (Homo sapiens: Organelle biogenesis and maintenance), R-HSA-5368286 (Homo sapiens: Mitochondrial translat…			0.494031	0.928505		-0.411511	-0.464145	-0.546881				468.158	65.037	67.6576	-1.27012	5.16212	74.2035	1.55103e-05	0.000942817	1.61322e-13	1.76741e-13	0.2	0.354767	0.162716	-0.866025	-0.945405	0.0576689	0.015187		46.3465	63.3364	23.8089	22.8843	21.4974
ENSG00000266412	NCOA4	PC	nuclear receptor coactivator 4	This gene encodes an androgen receptor coactivator. The encoded protein interacts with the androgen receptor in a ligand-dependent manner to enhance its transcriptional activity. Chromosomal translocations between this gene and the ret tyrosine kinase gene, also located on chromosome 10, have been associated with papillary thyroid carcinoma. Alternatively spliced transcript variants have been des…	hsa04216 (Ferroptosis), hsa05200 (Pathways in cancer), hsa05216 (Thyroid cancer), GO:0006351 (transcription, DNA-templated), GO:0006622 (protein targeting to lysosome), GO:0008584 (male gonad development), GO:0030521 (androgen receptor signaling pathway), GO:0045893 (positive regulation of transcription, DNA-templated), GO:0005634 (nucleus), GO:0044754 (autolysosome), GO:0003713 (transcription co…			0.448402	0.474918		-0.363921	-0.358983	-0.200415				467.82	83.136	84.4293	-0.784695	6.46171	74.1206	1.55784e-05	0.000942817	4.07251e-12	4.26148e-12	0.2	0.354767	0.000977886	-0.866025	-0.992399	0.0576689	0.000794573		116.386	118.582	65.4168	65.648	73.5072
ENSG00000137947	GTF2B	PC	general transcription factor IIB	This gene encodes the general transcription factor IIB, one of the ubiquitous factors required for transcription initiation by RNA polymerase II. The protein localizes to the nucleus where it forms a complex (the DAB complex) with transcription factors IID and IIA. Transcription factor IIB serves as a bridge between IID, the factor which initially recognizes the promoter sequence, and RNA polymer…	hsa03022 (Basal transcription factors), hsa05203 (Viral carcinogenesis), GO:0006355 (regulation of transcription, DNA-templated), GO:0006366 (transcription from RNA polymerase II promoter), GO:0006367 (transcription initiation from RNA polymerase II promoter), GO:0006368 (transcription elongation from RNA polymerase II promoter), GO:0016032 (viral process), GO:0042795 (snRNA transcription from RN…			0.67516	0.512383		-0.49602	-0.46891	-0.222612				467.196	73.5712	12.5809	-1.02408	5.72802	73.9674	1.57053e-05	0.000945623	3.06422e-13	3.0953e-13	0.2	0.354767	0.0283787	-0.866025	-0.979887	0.0576689	0.00341389		80.3263	71.5424	34.5576	35.2511	42.1858
ENSG00000136261	BZW2	PC	basic leucine zipper and W2 domains 2		GO:0007399 (nervous system development), GO:0030154 (cell differentiation), GO:0005737 (cytoplasm), GO:0016020 (membrane), GO:0045296 (cadherin binding)			0.579912	0.400983		-0.363858	-0.297652	-0.319385				464.862	75.3854	47.7002	-0.84821	5.84809	73.396	1.61901e-05	0.000969836	7.23256e-12	7.64467e-12	0.2	0.354767	0.0862918	-0.866025	-0.982681	0.0576689	0.00272887		83.2157	73.2761	42.3013	44.3817	43.6883
ENSG00000249835	VCAN-AS1	antisense	VCAN antisense RNA 1					0.495595	0.78063		-0.398755	-0.308339	-0.569131				464.423	69.5086	2.71721	-1.11611	5.45146	73.2886	1.62833e-05	0.000970466	3.23403e-13	3.48928e-13	0.2	0.354767	0.101464	-0.866025	-0.966479	0.0576689	0.00733023		57.7887	70.849	30.1657	32.2461	26.5828
ENSG00000154719	MRPL39	PC	mitochondrial ribosomal protein L39	Mammalian mitochondrial ribosomal proteins are encoded by nuclear genes and help in protein synthesis within the mitochondrion. Mitochondrial ribosomes (mitoribosomes) consist of a small 28S subunit and a large 39S subunit. They have an estimated 75% protein to rRNA composition compared to prokaryotic ribosomes, where this ratio is reversed. Another difference between mammalian mitoribosomes and …	GO:0070125 (mitochondrial translational elongation), GO:0070126 (mitochondrial translational termination), GO:0005743 (mitochondrial inner membrane), GO:0005761 (mitochondrial ribosome), GO:0005762 (mitochondrial large ribosomal subunit), GO:0000166 (nucleotide binding), GO:0003723 (RNA binding), R-HSA-1852241 (Homo sapiens: Organelle biogenesis and maintenance), R-HSA-5368286 (Homo sapiens: Mito…			0.55479	0.379487		-0.2575	-0.325398	-0.351379				463.088	82.0458	28.1772	-0.799431	6.36509	72.9626	1.657e-05	0.00098257	6.1659e-12	6.44692e-12	0.2	0.354767	0.0827212	-0.866025	-0.981129	0.0576689	0.00310296		117.196	103.557	65.8791	62.7585	61.6028
ENSG00000134986	NREP	PC	neuronal regeneration related protein		GO:0005737 (cytoplasm), GO:0005515 (protein binding)			0.474442	1.00511		-0.471052	-0.48113	-0.527373				460.997	72.1404	29.8041	-1.31026	5.61825	72.4533	1.70307e-05	0.0009929	5.22929e-14	5.62339e-14	0.2	0.354767	0.192712	-0.866025	-0.927138	0.0576689	0.0233495		61.9495	90.3815	31.2059	30.9747	29.9346
ENSG00000105372	RPS19	PC	ribosomal protein S19	Ribosomes, the organelles that catalyze protein synthesis, consist of a small 40S subunit and a large 60S subunit. Together these subunits are composed of 4 RNA species and approximately 80 structurally distinct proteins. This gene encodes a ribosomal protein that is a component of the 40S subunit. The protein belongs to the S19E family of ribosomal proteins. It is located in the cytoplasm. Mutat…	hsa03010 (Ribosome), GO:0000028 (ribosomal small subunit assembly), GO:0000184 (nuclear-transcribed mRNA catabolic process, nonsense-mediated decay), GO:0000462 (maturation of SSU-rRNA from tricistronic rRNA transcript (SSU-rRNA, 5.8S rRNA, LSU-rRNA)), GO:0002548 (monocyte chemotaxis), GO:0006364 (rRNA processing), GO:0006412 (translation), GO:0006413 (translational initiation), GO:0006614 (SRP-d…			-0.386361	-0.396944		0.276296	0.23461	0.272399				460.708	99.6678	12.6831	0.653523	11.0606	72.3829	1.70956e-05	0.0009929	8.09601e-11	8.42164e-11	0.2	0.354767	0.000324019	0.866025	0.998382	0.0576689	7.81124e-05		1595.08	1583.41	2526.18	2454.17	2519.36
ENSG00000109133	TMEM33	PC	transmembrane protein 33		GO:0008150 (biological_process), GO:0034613 (cellular protein localization), GO:0034976 (response to endoplasmic reticulum stress), GO:0051292 (nuclear pore complex assembly), GO:1903371 (regulation of endoplasmic reticulum tubular network organization), GO:1903896 (NA), GO:1903899 (NA), GO:0005635 (nuclear envelope), GO:0005643 (nuclear pore), GO:0005783 (endoplasmic reticulum), GO:0005789 (endo…			0.638146	0.711699		-0.387431	-0.488659	-0.473756				460.238	43.412	82.0443	-1.28002	3.91373	72.2686	1.72017e-05	0.0009929	1.68543e-11	1.99828e-11	0.2	0.354767	0.013456	-0.866025	-0.997289	0.0576689	0.000169352		22.3064	23.5778	9.93966	9.13062	9.24619
ENSG00000127337	YEATS4	PC	YEATS domain containing 4	The protein encoded by this gene is found in the nucleoli. It has high sequence homology to human MLLT1, and yeast and human MLLT3 proteins. Both MLLT1 and MLLT3 proteins belong to a class of transcription factors, indicating that the encoded protein might also represent a transcription factor. This protein is thought to be required for RNA transcription. This gene has been shown to be amplified …	GO:0006351 (transcription, DNA-templated), GO:0007010 (cytoskeleton organization), GO:0007067 (mitotic nuclear division), GO:0040008 (regulation of growth), GO:0043967 (histone H4 acetylation), GO:0043968 (histone H2A acetylation), GO:0045893 (positive regulation of transcription, DNA-templated), GO:0045944 (positive regulation of transcription from RNA polymerase II promoter), GO:0005654 (nucleo…			0.554629	1.04108		-0.590304	-0.556438	-0.448968				459.99	53.9988	20.0596	-1.47477	4.51483	72.2084	1.72578e-05	0.0009929	4.76442e-13	5.43105e-13	0.2	0.354767	0.169301	-0.866025	-0.94161	0.0576689	0.0167879		30.2813	43.226	12.5979	12.9447	14.1004
ENSG00000151914	DST	PC	dystonin	This gene encodes a member of the plakin protein family of adhesion junction plaque proteins. Multiple alternatively spliced transcript variants encoding distinct isoforms have been found for this gene, but the full-length nature of some variants has not been defined. It has been reported that some isoforms are expressed in neural and muscle tissue, anchoring neural intermediate filaments to the …	GO:0007010 (cytoskeleton organization), GO:0007155 (cell adhesion), GO:0007229 (integrin-mediated signaling pathway), GO:0008090 (retrograde axon cargo transport), GO:0009611 (response to wounding), GO:0030011 (maintenance of cell polarity), GO:0045104 (intermediate filament cytoskeleton organization), GO:0048870 (cell motility), GO:0005604 (basement membrane), GO:0005634 (nucleus), GO:0005635 (n…			0.565953	0.428605		-0.418288	-0.202069	-0.374201				459.294	84.5328	97.1124	-0.844329	6.59808	72.0392	1.74169e-05	0.0009929	1.83156e-12	1.88487e-12	0.2	0.354767	0.026717	-0.866025	-0.981592	0.0576689	0.00298988		137.999	125.286	68.7686	80.2107	70.9645
ENSG00000120992	LYPLA1	PC	lysophospholipase I	This gene encodes a member of the alpha/beta hydrolase superfamily. The encoded protein functions as a homodimer, exhibiting both depalmitoylating as well as lysophospholipase activity, and may be involved in Ras localization and signaling. Alternate splicing results in multiple transcript variants. Pseudogenes of this gene have been defined on chromosomes 4, 6, and 7. [provided by RefSeq, Jul 20…	hsa00564 (Glycerophospholipid metabolism), hsa05231 (Choline metabolism in cancer), GO:0002084 (protein depalmitoylation), GO:0006631 (fatty acid metabolic process), GO:0042997 (negative regulation of Golgi to plasma membrane protein transport), GO:0050999 (regulation of nitric-oxide synthase activity), GO:0005737 (cytoplasm), GO:0005739 (mitochondrion), GO:0005829 (cytosol), GO:0070062 (extracel…			0.571354	0.628529		-0.435727	-0.277295	-0.486861				459.279	57.8315	27.3595	-1.07281	4.74615	72.0357	1.74202e-05	0.0009929	8.01651e-12	8.95315e-12	0.2	0.354767	0.000621571	-0.866025	-0.993778	0.0576689	0.000588576		38.025	39.6431	17.9145	20.226	17.221
ENSG00000171566	PLRG1	PC	pleiotropic regulator 1	This gene encodes a core component of the cell division cycle 5-like (CDC5L) complex. The CDC5L complex is part of the spliceosome and is required for pre-mRNA splicing. The encoded protein plays a critical role in alternative splice site selection. Alternatively spliced transcript variants encoding multiple isoforms have been observed for this gene. [provided by RefSeq, Jan 2011].	hsa03040 (Spliceosome), GO:0000398 (mRNA splicing, via spliceosome), GO:0034504 (protein localization to nucleus), GO:1900087 (positive regulation of G1/S transition of mitotic cell cycle), GO:0000974 (Prp19 complex), GO:0001650 (fibrillar center), GO:0005654 (nucleoplasm), GO:0005662 (DNA replication factor A complex), GO:0016607 (nuclear speck), GO:0031965 (nuclear membrane), GO:0071011 (precat…			0.420151	0.581867		-0.378925	-0.382561	-0.240532				459.051	76.2882	21.0392	-0.863207	5.9198	71.9803	1.74727e-05	0.0009929	5.2118e-12	5.46813e-12	0.2	0.354767	0.0574352	-0.866025	-0.98256	0.0576689	0.00275747		77.8992	87.3765	43.9194	43.8038	48.5425
ENSG00000240344	PPIL3	PC	peptidylprolyl isomerase like 3	This gene encodes a member of the cyclophilin family. Cyclophilins catalyze the cis-trans isomerization of peptidylprolyl imide bonds in oligopeptides. They have been proposed to act either as catalysts or as molecular chaperones in protein-folding events. Alternative splicing results in multiple transcript variants. [provided by RefSeq, Sep 2008].	GO:0000398 (mRNA splicing, via spliceosome), GO:0000413 (protein peptidyl-prolyl isomerization), GO:0006457 (protein folding), GO:0071013 (catalytic step 2 spliceosome), GO:0003755 (peptidyl-prolyl cis-trans isomerase activity), GO:0005515 (protein binding)			0.608793	0.438979		-0.33045	-0.364357	-0.352966				458.884	66.0336	11.5417	-0.922229	5.23034	71.9397	1.75113e-05	0.0009929	1.84223e-11	2.0008e-11	0.2	0.354767	0.0807237	-0.866025	-0.986207	0.0576689	0.00194063		55.246	48.8892	27.8542	27.1607	27.3918
ENSG00000082213	C5orf22	PC	chromosome 5 open reading frame 22		GO:0005515 (protein binding)			0.578548	0.807162		-0.439133	-0.520583	-0.425994				458.545	46.5122	50.0256	-1.30253	4.07081	71.8575	1.75897e-05	0.0009929	1.09059e-11	1.27421e-11	0.2	0.354767	0.0870092	-0.866025	-0.982689	0.0576689	0.00272699		23.5778	27.9697	10.6331	9.93966	10.7487
ENSG00000166788	SAAL1	PC	serum amyloid A like 1		GO:0005615 (extracellular space)			0.452641	0.427649		-0.318364	-0.358987	-0.202939				458.544	84.1581	16.3458	-0.747359	6.56571	71.8574	1.75899e-05	0.0009929	1.30381e-11	1.36589e-11	0.2	0.354767	0.000711599	-0.866025	-0.993528	0.0576689	0.000624416		125.864	123.668	72.9294	70.849	79.1705
ENSG00000169714	CNBP	PC	CCHC-type zinc finger nucleic acid binding protein	This gene encodes a nucleic-acid binding protein with seven zinc-finger domains. The protein has a preference for binding single stranded DNA and RNA. The protein functions in cap-independent translation of ornithine decarboxylase mRNA, and may also function in sterol-mediated transcriptional regulation. A CCTG expansion in the first intron of this gene results in myotonic dystrophy type 2. Multi…	GO:0000122 (negative regulation of transcription from RNA polymerase II promoter), GO:0006351 (transcription, DNA-templated), GO:0006355 (regulation of transcription, DNA-templated), GO:0006695 (cholesterol biosynthetic process), GO:0008284 (positive regulation of cell proliferation), GO:0045893 (positive regulation of transcription, DNA-templated), GO:0045944 (positive regulation of transcriptio…			0.349076	0.654367		-0.331018	-0.329869	-0.342557				457.863	92.4708	41.6014	-0.853114	7.56236	71.6923	1.77488e-05	0.000997076	1.15191e-12	1.16165e-12	0.2	0.354767	0.148651	-0.866025	-0.955886	0.0576689	0.0110487		230.461	285.245	143.085	143.2	141.929
ENSG00000106105	GARS	PC	glycyl-tRNA synthetase	This gene encodes glycyl-tRNA synthetase, one of the aminoacyl-tRNA synthetases that charge tRNAs with their cognate amino acids. The encoded enzyme is an (alpha)2 dimer which belongs to the class II family of tRNA synthetases. It has been shown to be a target of autoantibodies in the human autoimmune diseases, polymyositis or dermatomyositis. [provided by RefSeq, Jul 2008]. Publication Note: Thi…	hsa00970 (Aminoacyl-tRNA biosynthesis), GO:0006418 (tRNA aminoacylation for protein translation), GO:0006426 (glycyl-tRNA aminoacylation), GO:0015966 (diadenosine tetraphosphate biosynthetic process), GO:0005737 (cytoplasm), GO:0005759 (mitochondrial matrix), GO:0005829 (cytosol), GO:0030141 (secretory granule), GO:0030424 (axon), GO:0070062 (extracellular vesicular exosome), GO:0004081 (bis(5'-n…			0.399307	0.363362		-0.236794	-0.257205	-0.26867				455.776	91.8917	20.1278	-0.642664	7.46719	71.1871	1.82461e-05	0.00101603	6.70147e-11	6.89761e-11	0.2	0.354767	0.0117217	-0.866025	-0.998643	0.0576689	6.00102e-05		228.15	222.487	146.09	144.009	142.854
ENSG00000181038	METTL23	PC	methyltransferase like 23	The protein encoded by this gene functions as a transcription factor regulator in the transcriptional pathway for human cognition. It is a partner of the alpha subunit of the GA-binding protein transcription factor. Mutations in this gene cause mild autosomal recessive intellectual disability. Alternative splicing results in multiple transcript variants. [provided by RefSeq, Nov 2014].	GO:0032259 (methylation), GO:0005737 (cytoplasm), GO:0016021 (integral component of membrane), GO:0008168 (methyltransferase activity)			0.522482	0.522482		-0.421278	-0.258671	-0.365015				455.752	64.3812	15.5877	-0.919072	5.12438	69.7829	1.97215e-05	0.00104876	3.0525e-11	3.33239e-11	0.138641	0.354767	0.00161939	-0.888523	-0.995966	0.043925	0.000307356		48.3114	48.3114	24.1557	27.2763	25.1959
ENSG00000198899	MT-ATP6	PC	mitochondrially encoded ATP synthase membrane subunit 6		hsa00190 (Oxidative phosphorylation), hsa01100 (Metabolic pathways), hsa04714 (Thermogenesis), hsa05010 (Alzheimer disease), hsa05012 (Parkinson disease), hsa05016 (Huntington disease), R-HSA-1428517 (Homo sapiens: The citric acid (TCA) cycle and respiratory electron transport), R-HSA-1430728 (Homo sapiens: Metabolism), R-HSA-163200 (Homo sapiens: Respiratory electron transport, ATP synthesis by …			0.548451	0.768228		-0.523372	-0.205737	-0.587569				455.722	99.9404	9.25043	-1.09181	12.9722	71.174	1.82593e-05	0.00101603	4.59091e-13	4.60133e-13	0.2	0.354767	0.04414	-0.866025	-0.970318	0.0576689	0.00611116		10894.6	12687.6	5181.68	6458.35	4956.08
ENSG00000164949	GEM	PC	GTP binding protein overexpressed in skeletal muscle	The protein encoded by this gene belongs to the RAD/GEM family of GTP-binding proteins. It is associated with the inner face of the plasma membrane and could play a role as a regulatory protein in receptor-mediated signal transduction. Alternative splicing occurs at this locus and two transcript variants encoding the same protein have been identified. [provided by RefSeq, Jul 2008].	GO:0006955 (immune response), GO:0007067 (mitotic nuclear division), GO:0007165 (signal transduction), GO:0007166 (cell surface receptor signaling pathway), GO:0051276 (chromosome organization), GO:0051310 (metaphase plate congression), GO:0005634 (nucleus), GO:0009898 (cytoplasmic side of plasma membrane), GO:0030496 (midbody), GO:0051233 (spindle midzone), GO:0072686 (mitotic spindle), GO:00002…			0.85768	1.24197		-1.05604	-0.502388	-0.541223				454.992	39.8348	39.77	-2.05573	3.71729	70.9976	1.84371e-05	0.00102108	1.79075e-14	2.29313e-14	0.2	0.354767	0.100846	-0.866025	-0.966018	0.0576689	0.00748124		20.3416	27.1607	3.92963	6.70349	6.47234
ENSG00000126524	SBDS	PC	SBDS, ribosome maturation factor	This gene encodes a member of a highly conserved protein family that exists from archaea to vertebrates and plants. The encoded protein may function in RNA metabolism. Mutations within this gene are associated with Shwachman-Bodian-Diamond syndrome. An alternative transcript has been described, but its biological nature has not been determined. This gene has a closely linked pseudogene that is di…	hsa03008 (Ribosome biogenesis in eukaryotes), GO:0001833 (inner cell mass cell proliferation), GO:0006364 (rRNA processing), GO:0007052 (mitotic spindle organization), GO:0008283 (cell proliferation), GO:0030282 (bone mineralization), GO:0030595 (leukocyte chemotaxis), GO:0042256 (mature ribosome assembly), GO:0048539 (bone marrow development), GO:0000922 (spindle pole), GO:0005634 (nucleus), GO:…			0.504342	0.408869		-0.209387	-0.282803	-0.421022				454.191	91.304	29.8552	-0.768201	7.37196	70.8043	1.86344e-05	0.00102717	5.00185e-12	5.09939e-12	0.2	0.354767	0.00819024	-0.866025	-0.985457	0.0576689	0.00210068		227.225	212.547	137.768	130.834	118.698
ENSG00000147274	RBMX	PC	RNA binding motif protein X-linked	This gene belongs to the RBMY gene family which includes candidate Y chromosome spermatogenesis genes. This gene, an active X chromosome homolog of the Y chromosome RBMY gene, is widely expressed whereas the RBMY gene evolved a male-specific function in spermatogenesis. Pseudogenes of this gene, found on chromosomes 1, 4, 9, 11, and 6, were likely derived by retrotransposition from the original g…	hsa03040 (Spliceosome), GO:0000381 (regulation of alternative mRNA splicing, via spliceosome), GO:0000398 (mRNA splicing, via spliceosome), GO:0001649 (osteoblast differentiation), GO:0006366 (transcription from RNA polymerase II promoter), GO:0006376 (mRNA splice site selection), GO:0006509 (membrane protein ectodomain proteolysis), GO:0010467 (gene expression), GO:0045944 (positive regulation o…			0.610061	0.341515		-0.329351	-0.292873	-0.329351				453.402	89.839	60.3407	-0.809971	7.18705	69.2272	2.03456e-05	0.00106642	5.38821e-12	5.48494e-12	0.138641	0.354767	0.135933	-0.888523	-0.962246	0.043925	0.0087561		214.396	177.642	110.839	113.728	110.839
ENSG00000263266	RPS7P1	p_Pg	ribosomal protein S7 pseudogene 1					0.650804	1.5009		-0.872561	-0.55112	-0.728022				452.692	70.5136	6.40545	-1.94274	5.51702	70.4432	1.90101e-05	0.00104298	1.40919e-15	1.59133e-15	0.2	0.354767	0.239141	-0.866025	-0.889097	0.0576689	0.0435905		57.9043	105.984	18.8391	24.0401	21.0351
ENSG00000244398	AC116533.1	p_Pg						0.829744	0.61702		-0.486655	-0.292003	-0.668106				451.726	56.3581	1.45656	-1.30054	4.65644	70.2107	1.92569e-05	0.00104826	7.71938e-13	8.70313e-13	0.2	0.354767	0.0459911	-0.866025	-0.978214	0.0576689	0.00384753		41.839	35.829	15.603	18.1457	13.5226
ENSG00000113407	TARS	PC	threonyl-tRNA synthetase	Aminoacyl-tRNA synthetases catalyze the aminoacylation of tRNA by their cognate amino acid. Because of their central role in linking amino acids with nucleotide triplets contained in tRNAs, aminoacyl-tRNA synthetases are thought to be among the first proteins that appeared in evolution. Threonyl-tRNA synthetase belongs to the class-II aminoacyl-tRNA synthetase family [provided by RefSeq, Jul 2008…	hsa00970 (Aminoacyl-tRNA biosynthesis), GO:0006412 (translation), GO:0006418 (tRNA aminoacylation for protein translation), GO:0006435 (threonyl-tRNA aminoacylation), GO:0005737 (cytoplasm), GO:0005829 (cytosol), GO:0015629 (actin cytoskeleton), GO:0070062 (extracellular vesicular exosome), GO:0004829 (threonine-tRNA ligase activity), GO:0005515 (protein binding), GO:0005524 (ATP binding), GO:004…			0.487879	0.332717		-0.297038	-0.282933	-0.240625				451.617	94.5064	47.3254	-0.691089	7.97161	70.1846	1.92849e-05	0.00104826	2.34939e-11	2.38116e-11	0.2	0.354767	0.0848729	-0.866025	-0.982713	0.0576689	0.00272143		342.571	307.436	197.984	199.949	205.959
ENSG00000198818	SFT2D1	PC	SFT2 domain containing 1		GO:0015031 (protein transport), GO:0016192 (vesicle-mediated transport), GO:0016020 (membrane), GO:0016021 (integral component of membrane)			0.467692	0.698355		-0.370825	-0.393749	-0.401472				450.662	59.075	37.5298	-1.0459	4.82592	69.9549	1.9533e-05	0.00104876	2.45885e-11	2.71912e-11	0.2	0.354767	0.101917	-0.866025	-0.97866	0.0576689	0.0037302		37.3315	44.1506	19.9949	19.6482	19.5326
ENSG00000103335	PIEZO1	PC	piezo type mechanosensitive ion channel component 1	Piezos are large transmembrane proteins conserved among various species, all having between 24 and 36 predicted transmembrane domains. _Piezo_ comes from the Greek _piesi,_ meaning _pressure._ The FAM38A gene encodes PIEZO1, a protein that induces mechanically activated (MA) currents in various cell types (Coste et al., 2010 [PubMed 20813920]).[supplied by OMIM, Nov 2010]. Sequence Note: The RefS…	GO:0006812 (cation transport), GO:0033625 (positive regulation of integrin activation), GO:0033634 (positive regulation of cell-cell adhesion mediated by integrin), GO:0042391 (regulation of membrane potential), GO:0050982 (detection of mechanical stimulus), GO:0071260 (cellular response to mechanical stimulus), GO:0098655 (cation transmembrane transport), GO:0005783 (endoplasmic reticulum), GO:0…			-0.550203	-0.420164		0.209685	0.37721	0.383473				449.882	85.7252	47.138	0.826574	6.70583	69.7678	1.97381e-05	0.00104876	7.69424e-12	6.62097e-12	0.2	0.354767	0.00270685	0.866025	0.977542	0.0576689	0.00402644		67.8439	74.4319	116.271	130.834	131.412
ENSG00000074201	CLNS1A	PC	chloride nucleotide-sensitive channel 1A	This gene encodes a protein that functions in multiple regulatory pathways. The encoded protein complexes with numerous cytosolic proteins and performs diverse functions including regulation of small nuclear ribonucleoprotein biosynthesis, platelet activation and cytoskeletal organization. The protein is also found associated with the plasma membrane where it functions as a chloride current regul…	hsa03013 (RNA transport), GO:0000387 (spliceosomal snRNP assembly), GO:0006821 (chloride transport), GO:0006884 (cell volume homeostasis), GO:0005634 (nucleus), GO:0005654 (nucleoplasm), GO:0005829 (cytosol), GO:0005856 (cytoskeleton), GO:0005886 (plasma membrane), GO:0034709 (methylosome), GO:0034715 (pICln-Sm protein complex), GO:0003723 (RNA binding), GO:0005515 (protein binding), GO:0046982 (…			0.36633	0.375503		-0.278053	-0.226915	-0.236866				449.88	95.6137	17.5468	-0.622073	8.22956	69.7672	1.97387e-05	0.00104876	9.95805e-11	1.00864e-10	0.2	0.354767	6.18826e-05	-0.866025	-0.998913	0.0576689	4.30209e-05		378.516	380.943	241.441	250.225	248.491
ENSG00000248527	MTATP6P1	u_Pg	mitochondrially encoded ATP synthase 6 pseudogene 1					0.49938	0.542676		-0.386155	-0.162701	-0.493201				449.872	99.3697	9.25043	-0.86309	10.4842	69.7655	1.97407e-05	0.00104876	1.60925e-12	1.60025e-12	0.2	0.354767	0.0031724	-0.866025	-0.981946	0.0576689	0.00290403		1932.8	1991.75	1045.28	1220.73	970.388
ENSG00000163029	SMC6	PC	structural maintenance of chromosomes 6		GO:0000722 (telomere maintenance via recombination), GO:0000724 (double-strand break repair via homologous recombination), GO:0006974 (cellular response to DNA damage stimulus), GO:0051984 (positive regulation of chromosome segregation), GO:0090398 (cellular senescence), GO:0000781 (chromosome, telomeric region), GO:0000803 (sex chromosome), GO:0005622 (intracellular), GO:0005634 (nucleus), GO:00…			0.607046	0.521457		-0.447051	-0.41735	-0.264102				449.211	60.8381	82.6661	-1.00146	4.91594	69.607	1.99164e-05	0.00105333	1.99688e-11	2.20313e-11	0.2	0.354767	0.00581192	-0.866025	-0.992144	0.0576689	0.000834859		44.1506	41.4923	20.226	20.6884	23.2311
ENSG00000116815	CD58	PC	CD58 molecule	This gene encodes a member of the immunoglobulin superfamily. The encoded protein is a ligand of the T lymphocyte CD2 protein, and functions in adhesion and activation of T lymphocytes. The protein is localized to the plasma membrane. Alternatively spliced transcript variants have been described. [provided by RefSeq, Jan 2009].	hsa04514 (Cell adhesion molecules (CAMs)), hsa05169 (Epstein-Barr virus infection), GO:0007155 (cell adhesion), GO:0016337 (single organismal cell-cell adhesion), GO:0034113 (heterotypic cell-cell adhesion), GO:0043312 (neutrophil degranulation), GO:0050900 (leukocyte migration), GO:0071346 (cellular response to interferon-gamma), GO:0071356 (cellular response to tumor necrosis factor), GO:200048…			0.684967	1.46622		-0.896434	-0.700078	-0.554675				447.631	50.9752	19.1397	-2.05458	4.33649	69.2286	2.0344e-05	0.00106642	3.07064e-14	3.69051e-14	0.2	0.354767	0.222371	-0.866025	-0.902434	0.0576689	0.036043		26.4672	46.9244	7.51253	8.89946	10.0552
ENSG00000243449	C4orf48	PC	chromosome 4 open reading frame 48		GO:0005576 (extracellular region)			-0.547307	-0.619122		0.315505	0.290525	0.5604				447.124	72.3363	3.08348	1.02225	5.63311	69.1074	2.04834e-05	0.00106887	4.85316e-12	5.68308e-12	0.2	0.354767	0.0125068	0.866025	0.962818	0.0576689	0.00855858		31.3215	29.7034	58.5978	57.5576	69.8088
ENSG00000213443	AC007068.1	p_Pg						0.971591	0.621393		-0.71125	-0.272782	-0.608952				446.251	62.8907	15.2981	-1.411	5.03566	68.8989	2.07259e-05	0.00107261	1.34016e-13	1.48537e-13	0.2	0.354767	0.101186	-0.866025	-0.95912	0.0576689	0.009861		58.5978	45.5375	16.8743	23.5778	18.2612
ENSG00000150991	UBC	PC	ubiquitin C	This gene represents a ubiquitin gene, ubiquitin C. The encoded protein is a polyubiquitin precursor. Conjugation of ubiquitin monomers or polymers can lead to various effects within a cell, depending on the residues to which ubiquitin is conjugated. Ubiquitination has been associated with protein degradation, DNA repair, cell cycle regulation, kinase modification, endocytosis, and regulation of …	hsa03320 (PPAR signaling pathway), GO:0000086 (G2/M transition of mitotic cell cycle), GO:0000122 (negative regulation of transcription from RNA polymerase II promoter), GO:0000165 (MAPK cascade), GO:0000187 (activation of MAPK activity), GO:0000209 (protein polyubiquitination), GO:0000715 (nucleotide-excision repair, DNA damage recognition), GO:0000717 (nucleotide-excision repair, DNA duplex unw…			-0.396073	-0.367437		0.287043	0.217466	0.259001				446.208	96.6357	24.5571	0.640147	8.53421	68.8887	2.07378e-05	0.00107261	1.12137e-10	1.11613e-10	0.2	0.354767	0.00035609	0.866025	0.995921	0.0576689	0.000312568		274.728	280.275	442.315	421.395	433.762
ENSG00000169288	MRPL1	PC	mitochondrial ribosomal protein L1	Mammalian mitochondrial ribosomal proteins are encoded by nuclear genes and help in protein synthesis within the mitochondrion. Mitochondrial ribosomes (mitoribosomes) consist of a small 28S subunit and a large 39S subunit. They have an estimated 75% protein to rRNA composition compared to prokaryotic ribosomes, where this ratio is reversed. Another difference between mammalian mitoribosomes and …	hsa03010 (Ribosome), GO:0000469 (cleavage involved in rRNA processing), GO:0000470 (maturation of LSU-rRNA), GO:0006412 (translation), GO:0031118 (rRNA pseudouridine synthesis), GO:0031120 (snRNA pseudouridine synthesis), GO:0070125 (mitochondrial translational elongation), GO:0070126 (mitochondrial translational termination), GO:0005739 (mitochondrion), GO:0005743 (mitochondrial inner membrane),…			0.621964	0.530016		-0.486021	-0.336904	-0.329055				445.699	57.5505	12.4361	-1.03205	4.72865	68.7673	2.08808e-05	0.00107527	3.66931e-11	4.08407e-11	0.2	0.354767	0.0113716	-0.866025	-0.993096	0.0576689	0.000687897		39.1807	36.638	17.1055	19.1859	19.3014
ENSG00000198727	MT-CYB	PC	mitochondrially encoded cytochrome b		hsa00190 (Oxidative phosphorylation), hsa01100 (Metabolic pathways), hsa04260 (Cardiac muscle contraction), hsa04714 (Thermogenesis), hsa04932 (Non-alcoholic fatty liver disease (NAFLD)), hsa05010 (Alzheimer disease), hsa05012 (Parkinson disease), hsa05016 (Huntington disease), R-HSA-1428517 (Homo sapiens: The citric acid (TCA) cycle and respiratory electron transport), R-HSA-1430728 (Homo sapien…			0.53146	0.551933		-0.390918	-0.182119	-0.510356				445.126	99.9233	33.0835	-0.896657	12.9411	68.6305	2.10432e-05	0.0010789	9.06511e-12	9.0132e-12	0.2	0.354767	0.00475215	-0.866025	-0.98487	0.0576689	0.00222896		10810.6	10965.2	5703.17	6591.61	5249.87
ENSG00000210144	MT-TY	Mt_tRNA	mitochondrially encoded tRNA tyrosine					1.02377	0.939242		-0.755787	-0.317269	-0.889953				444.53	35.7125	0.144804	-1.95116	3.48088	68.4886	2.12135e-05	0.00108087	6.61798e-14	8.59923e-14	0.2	0.354767	0.000891873	-0.866025	-0.98948	0.0576689	0.00129326		20.3416	19.0703	4.50752	6.81907	3.92963
ENSG00000173546	CSPG4	PC	chondroitin sulfate proteoglycan 4	A human melanoma-associated chondroitin sulfate proteoglycan plays a role in stabilizing cell-substratum interactions during early events of melanoma cell spreading on endothelial basement membranes. CSPG4 represents an integral membrane chondroitin sulfate proteoglycan expressed by human malignant melanoma cells. [provided by RefSeq, Jul 2008]. Publication Note: This RefSeq record includes a sub…	GO:0000187 (activation of MAPK activity), GO:0001525 (angiogenesis), GO:0007169 (transmembrane receptor protein tyrosine kinase signaling pathway), GO:0008283 (cell proliferation), GO:0008347 (glial cell migration), GO:0030203 (glycosaminoglycan metabolic process), GO:0030206 (chondroitin sulfate biosynthetic process), GO:0030207 (chondroitin sulfate catabolic process), GO:0030208 (dermatan sulfa…			-0.447241	-0.473135		0.271987	0.307908	0.340481				444.348	73.6138	99.8552	0.799072	5.73179	68.4453	2.12657e-05	0.00108087	1.25375e-10	1.4305e-10	0.2	0.354767	0.000321446	0.866025	0.997117	0.0576689	0.000185731		36.9848	36.2913	62.1807	63.7987	65.3012
ENSG00000196642	RABL6	PC	RAB, member RAS oncogene family like 6	This gene encodes a member of the Ras superfamily of small GTPases. The encoded protein binds to both GTP and GDP and may play a role in cell growth and survival. Overexpression of this gene may play a role in breast cancer tumorigenesis, and pseudogenes of this gene are located on the long arm of chromosome 2 and the short arm of chromosome 18. Alternatively spliced transcript variants encoding …	GO:0005634 (nucleus), GO:0005737 (cytoplasm), GO:0003924 (GTPase activity), GO:0005515 (protein binding), GO:0005525 (GTP binding)			-0.65652	-0.386781		0.255057	0.389576	0.398668				443.44	91.6617	83.9267	0.875768	7.43556	68.229	2.15292e-05	0.00108954	2.43693e-12	2.26864e-12	0.2	0.354767	0.0237226	0.866025	0.977695	0.0576689	0.00398545		104.251	126.095	197.869	217.401	218.788
ENSG00000197372	ZNF675	PC	zinc finger protein 675		GO:0000122 (negative regulation of transcription from RNA polymerase II promoter), GO:0006351 (transcription, DNA-templated), GO:0007249 (I-kappaB kinase/NF-kappaB signaling), GO:0010804 (negative regulation of tumor necrosis factor-mediated signaling pathway), GO:0019221 (cytokine-mediated signaling pathway), GO:0032088 (negative regulation of NF-kappaB transcription factor activity), GO:0043508…			0.845033	1.49761		-1.16259	-0.608935	-0.571119				441.042	43.6675	42.4361	-2.2884	3.92695	67.6597	2.22422e-05	0.0011208	2.77716e-14	3.54775e-14	0.2	0.354767	0.178932	-0.866025	-0.929299	0.0576689	0.022326		21.8441	35.4823	3.92963	6.70349	6.93465
ENSG00000163931	TKT	PC	transketolase	This gene encodes a thiamine-dependent enzyme which plays a role in the channeling of excess sugar phosphates to glycolysis in the pentose phosphate pathway. Alternatively spliced transcript variants encoding multiple isoforms have been observed for this gene. [provided by RefSeq, Apr 2012].	hsa00030 (Pentose phosphate pathway), hsa01100 (Metabolic pathways), hsa01200 (Carbon metabolism), hsa01230 (Biosynthesis of amino acids), GO:0005999 (xylulose biosynthetic process), GO:0006098 (pentose-phosphate shunt), GO:0009052 (pentose-phosphate shunt, non-oxidative branch), GO:0040008 (regulation of growth), GO:0046166 (glyceraldehyde-3-phosphate biosynthetic process), GO:0005654 (nucleopla…			-0.476843	-0.32548		0.272645	0.264556	0.265122				440.325	98.4584	74.0971	0.668529	9.55608	67.4896	2.24609e-05	0.001123	7.8698e-11	8.06032e-11	0.2	0.354767	0.0559872	0.866025	0.993372	0.0576689	0.000647166		526.686	585.168	886.826	881.856	882.202
ENSG00000070367	EXOC5	PC	exocyst complex component 5	The protein encoded by this gene is a component of the exocyst complex, a multiple protein complex essential for targeting exocytic vesicles to specific docking sites on the plasma membrane. Though best characterized in yeast, the component proteins and functions of exocyst complex have been demonstrated to be highly conserved in higher eukaryotes. At least eight components of the exocyst complex…	GO:0006887 (exocytosis), GO:0006892 (post-Golgi vesicle-mediated transport), GO:0006893 (Golgi to plasma membrane transport), GO:0015031 (protein transport), GO:0048278 (vesicle docking), GO:0000145 (exocyst), GO:0005737 (cytoplasm), GO:0005829 (cytosol), GO:0005515 (protein binding), GO:0017160 (Ral GTPase binding), GO:0047485 (protein N-terminus binding), R-HSA-1445148 (Homo sapiens: Translocat…			0.593682	0.983031		-0.454247	-0.524376	-0.598089				440.272	39.7326	88.7564	-1.5444	3.71221	67.477	2.24772e-05	0.001123	1.2771e-11	1.53799e-11	0.2	0.354767	0.137545	-0.866025	-0.960116	0.0576689	0.00950426		18.1457	24.3868	7.74369	7.28138	6.81907
ENSG00000100883	SRP54	PC	signal recognition particle 54		hsa03060 (Protein export), GO:0006614 (SRP-dependent cotranslational protein targeting to membrane), GO:0006616 (SRP-dependent cotranslational protein targeting to membrane, translocation), GO:0006617 (SRP-dependent cotranslational protein targeting to membrane, signal sequence recognition), GO:0042493 (response to drug), GO:0045047 (protein targeting to ER), GO:0005634 (nucleus), GO:0005737 (cyt…			0.551061	0.371003		-0.275024	-0.260459	-0.386581				439.148	82.4291	23.7564	-0.788248	6.39195	67.211	2.28248e-05	0.00113553	2.5142e-11	2.62266e-11	0.2	0.354767	0.0789204	-0.866025	-0.978094	0.0576689	0.00387912		119.16	104.944	66.3414	67.0349	61.256
ENSG00000068697	LAPTM4A	PC	lysosomal protein transmembrane 4 alpha	This gene encodes a protein that has four predicted transmembrane domains. The function of this gene has not yet been determined; however, studies in the mouse homolog suggest a role in the transport of small molecules across endosomal and lysosomal membranes. [provided by RefSeq, Jul 2008].	hsa04142 (Lysosome), GO:0006810 (transport), GO:0005794 (Golgi apparatus), GO:0016021 (integral component of membrane)			0.406276	0.386354		-0.184126	-0.339863	-0.268641				437.823	95.4604	31.9932	-0.663588	8.1898	66.8979	2.32425e-05	0.00114931	7.36925e-11	7.4471e-11	0.2	0.354767	0.00125325	-0.866025	-0.992506	0.0576689	0.000777815		377.245	372.044	249.878	224.105	235.547
ENSG00000095002	MSH2	PC	mutS homolog 2	This locus is frequently mutated in hereditary nonpolyposis colon cancer (HNPCC). When cloned, it was discovered to be a human homolog of the E. coli mismatch repair gene mutS, consistent with the characteristic alterations in microsatellite sequences (RER+ phenotype) found in HNPCC. Two transcript variants encoding different isoforms have been found for this gene. [provided by RefSeq, Apr 2012].	hsa01524 (Platinum drug resistance), hsa03430 (Mismatch repair), hsa05200 (Pathways in cancer), hsa05210 (Colorectal cancer), GO:0001701 (in utero embryonic development), GO:0006119 (oxidative phosphorylation), GO:0006281 (DNA repair), GO:0006298 (mismatch repair), GO:0006301 (postreplication repair), GO:0006302 (double-strand break repair), GO:0007050 (cell cycle arrest), GO:0007281 (germ cell d…			0.490752	0.414272		-0.39898	-0.214545	-0.291499				437.138	80.5127	69.4889	-0.772374	6.24272	66.7363	2.34616e-05	0.00114931	3.98957e-11	4.20006e-11	0.2	0.354767	0.00417942	-0.866025	-0.989391	0.0576689	0.0013097		103.211	97.7785	54.7837	62.5274	59.1756
ENSG00000074696	HACD3	PC	3-hydroxyacyl-CoA dehydratase 3		hsa00062 (Fatty acid elongation), hsa01040 (Biosynthesis of unsaturated fatty acids), hsa01100 (Metabolic pathways), hsa01212 (Fatty acid metabolism), GO:0007249 (I-kappaB kinase/NF-kappaB signaling), GO:0007257 (activation of JUN kinase activity), GO:0007264 (small GTPase mediated signal transduction), GO:0007266 (Rho protein signal transduction), GO:0016601 (Rac protein signal transduction), GO…			0.515963	0.385313		-0.232412	-0.411253	-0.257611				436.944	87.5735	57.9813	-0.762753	6.9068	66.6906	2.3524e-05	0.00114931	2.19262e-11	2.25826e-11	0.2	0.354767	0.0320637	-0.866025	-0.982342	0.0576689	0.00280915		166.2	151.638	98.1252	86.4519	96.3916
ENSG00000040275	SPDL1	PC	spindle apparatus coiled-coil protein 1		GO:0000132 (establishment of mitotic spindle orientation), GO:0007062 (sister chromatid cohesion), GO:0007080 (mitotic metaphase plate congression), GO:0031577 (spindle checkpoint), GO:0034501 (protein localization to kinetochore), GO:0051301 (cell division), GO:0000922 (spindle pole), GO:0000940 (condensed chromosome outer kinetochore), GO:0005634 (nucleus), GO:0005815 (microtubule organizing ce…			0.367317	0.475439		-0.318076	-0.229313	-0.295368				436.933	82.0458	18.075	-0.71963	6.36509	66.6878	2.35279e-05	0.00114931	1.10846e-10	1.17104e-10	0.2	0.354767	0.0437761	-0.866025	-0.990098	0.0576689	0.00118104		103.442	111.648	63.5676	67.7284	64.6078
ENSG00000113460	BRIX1	PC	BRX1, biogenesis of ribosomes		GO:0000027 (ribosomal large subunit assembly), GO:0005634 (nucleus), GO:0005730 (nucleolus), GO:0003723 (RNA binding)			0.902983	0.399166		-0.460772	-0.429079	-0.412298				436.556	84.7969	62.3339	-1.12961	6.62873	66.599	2.36499e-05	0.00114931	3.50977e-13	3.46843e-13	0.2	0.354767	0.198492	-0.866025	-0.922966	0.0576689	0.0253675		172.095	120.778	65.648	67.1505	67.9595
ENSG00000126787	DLGAP5	PC	DLG associated protein 5		GO:0006470 (protein dephosphorylation), GO:0007079 (mitotic chromosome movement towards spindle pole), GO:0008283 (cell proliferation), GO:0023052 (signaling), GO:0045842 (positive regulation of mitotic metaphase/anaphase transition), GO:0005634 (nucleus), GO:0005739 (mitochondrion), GO:0005815 (microtubule organizing center), GO:0005829 (cytosol), GO:0031616 (spindle pole centrosome), GO:0004721…			0.670257	0.490364		-0.432807	-0.525577	-0.202237				436.436	75.9475	60.5707	-0.996133	5.89031	66.5707	2.3689e-05	0.00114931	2.3321e-12	2.36781e-12	0.2	0.354767	0.033722	-0.866025	-0.974596	0.0576689	0.00484203		89.6881	78.9394	40.6833	38.025	48.0802
ENSG00000198612	COPS8	PC	COP9 signalosome subunit 8	The protein encoded by this gene is one of the eight subunits of COP9 signalosome, a highly conserved protein complex that functions as an important regulator in multiple signaling pathways. The structure and function of COP9 signalosome is similar to that of the 19S regulatory particle of 26S proteasome. COP9 signalosome has been shown to interact with SCF-type E3 ubiquitin ligases and act as a …	GO:0000338 (protein deneddylation), GO:0000715 (nucleotide-excision repair, DNA damage recognition), GO:0006283 (transcription-coupled nucleotide-excision repair), GO:0007250 (activation of NF-kappaB-inducing kinase activity), GO:0008285 (negative regulation of cell proliferation), GO:0010387 (COP9 signalosome assembly), GO:0005634 (nucleus), GO:0005654 (nucleoplasm), GO:0005829 (cytosol), GO:000…			0.576761	0.385136		-0.344761	-0.284608	-0.332528				436.051	73.1709	43.7394	-0.835253	5.70071	66.4801	2.38145e-05	0.00115064	6.17091e-11	6.55601e-11	0.2	0.354767	0.0946169	-0.866025	-0.979836	0.0576689	0.00342675		75.1253	65.5324	38.7184	40.4521	39.0652
ENSG00000138750	NUP54	PC	nucleoporin 54	The nuclear envelope creates distinct nuclear and cytoplasmic compartments in eukaryotic cells. It consists of two concentric membranes perforated by nuclear pores, large protein complexes that form aqueous channels to regulate the flow of macromolecules between the nucleus and the cytoplasm. These complexes are composed of at least 100 different polypeptide subunits, many of which belong to the …	hsa03013 (RNA transport), GO:0006406 (mRNA export from nucleus), GO:0006409 (tRNA export from nucleus), GO:0006607 (NLS-bearing protein import into nucleus), GO:0006999 (nuclear pore organization), GO:0007077 (mitotic nuclear envelope disassembly), GO:0010827 (regulation of glucose transport), GO:0016032 (viral process), GO:0016925 (protein sumoylation), GO:0019083 (viral transcription), GO:00310…			0.43497	0.628322		-0.430339	-0.330521	-0.302431				435.378	65.778	21.1073	-0.936344	5.20976	66.3216	2.4036e-05	0.00115064	4.89047e-11	5.29504e-11	0.2	0.354767	0.080305	-0.866025	-0.980492	0.0576689	0.0032613		47.9646	55.1304	25.427	27.3918	27.9697
ENSG00000073792	IGF2BP2	PC	insulin like growth factor 2 mRNA binding protein 2	This gene encodes a member of the IGF-II mRNA-binding protein (IMP) family. The protein encoded by this gene contains four KH domains and two RRM domains. It functions by binding to the 5_ UTR of the insulin-like growth factor 2 (IGF2) mRNA and regulating IGF2 translation. Alternative promoter usage and alternate splicing result in multiple variants encoding different isoforms. [provided by RefSe…	GO:0009653 (anatomical structure morphogenesis), GO:0010467 (gene expression), GO:0017148 (negative regulation of translation), GO:0042035 (regulation of cytokine biosynthetic process), GO:0051028 (mRNA transport), GO:0005634 (nucleus), GO:0005737 (cytoplasm), GO:0005829 (cytosol), GO:0005856 (cytoskeleton), GO:0003723 (RNA binding), GO:0003730 (mRNA 3'-UTR binding), GO:0005515 (protein binding),…			0.561085	0.36019		-0.340602	-0.294828	-0.285845				435.126	78.7923	48.1516	-0.793202	6.10513	66.2622	2.41196e-05	0.00115064	5.39727e-11	5.68238e-11	0.2	0.354767	0.103143	-0.866025	-0.976665	0.0576689	0.00426399		98.472	85.4117	51.7787	53.5123	53.8591
ENSG00000147471	PLPBP	PC	pyridoxal phosphate binding protein		GO:0008150 (biological_process), GO:0005622 (intracellular), GO:0005737 (cytoplasm), GO:0005739 (mitochondrion), GO:0070062 (extracellular vesicular exosome), GO:0030170 (pyridoxal phosphate binding)			0.531239	0.684153		-0.393826	-0.343659	-0.477908				434.875	51.9036	12.368	-1.11198	4.39631	66.2032	2.42031e-05	0.00115064	9.23245e-11	1.04437e-10	0.2	0.354767	0.0530005	-0.866025	-0.989254	0.0576689	0.00133502		29.0099	32.4773	14.3316	14.9095	13.407
ENSG00000113387	SUB1	PC	SUB1 homolog, transcriptional regulator		GO:0006357 (regulation of transcription from RNA polymerase II promoter), GO:0006366 (transcription from RNA polymerase II promoter), GO:0060261 (positive regulation of transcription initiation from RNA polymerase II promoter), GO:0060395 (SMAD protein signal transduction), GO:0005634 (nucleus), GO:0005667 (transcription factor complex), GO:0005730 (nucleolus), GO:0070062 (extracellular vesicular…			0.708036	0.403394		-0.262719	-0.522327	-0.326384				434.864	94.9664	37.385	-0.936844	8.09358	66.2008	2.42066e-05	0.00115064	1.30742e-12	1.30729e-12	0.2	0.354767	0.119606	-0.866025	-0.953984	0.0576689	0.0117673		423.013	342.109	214.858	179.145	205.497
ENSG00000107789	MINPP1	PC	multiple inositol-polyphosphate phosphatase 1	This gene encodes multiple inositol polyphosphate phosphatase; an enzyme that removes 3-phosphate from inositol phosphate substrates. It is the only enzyme known to hydrolzye inositol pentakisphosphate and inositol hexakisphosphate. This enzyme also converts 2,3 bisphosphoglycerate (2,3-BPG) to 2-phosphoglycerate; an activity formerly thought to be exclusive to 2,3-BPG synthase/2-phosphatase (BPG…	hsa00010 (Glycolysis / Gluconeogenesis), hsa00562 (Inositol phosphate metabolism), hsa01100 (Metabolic pathways), GO:0001503 (ossification), GO:0006797 (polyphosphate metabolic process), GO:0016311 (dephosphorylation), GO:0030282 (bone mineralization), GO:0043647 (inositol phosphate metabolic process), GO:0005783 (endoplasmic reticulum), GO:0005788 (endoplasmic reticulum lumen), GO:0070062 (extra…			0.657952	1.05872		-0.581178	-0.490611	-0.644878				434.493	24.7679	69.8978	-1.89583	2.87334	66.1135	2.43308e-05	0.00115189	1.01323e-11	1.36496e-11	0.2	0.354767	0.134737	-0.866025	-0.961777	0.0576689	0.00891902		10.6331	14.6783	3.35175	3.69848	3.12059
ENSG00000108654	DDX5	PC	DEAD-box helicase 5	DEAD box proteins, characterized by the conserved motif Asp-Glu-Ala-Asp (DEAD), are putative RNA helicases. They are implicated in a number of cellular processes involving alteration of RNA secondary structure, such as translation initiation, nuclear and mitochondrial splicing, and ribosome and spliceosome assembly. Based on their distribution patterns, some members of this family are believed to…	hsa03040 (Spliceosome), hsa05202 (Transcriptional misregulation in cancer), hsa05205 (Proteoglycans in cancer), GO:0000122 (negative regulation of transcription from RNA polymerase II promoter), GO:0000380 (alternative mRNA splicing, via spliceosome), GO:0000381 (regulation of alternative mRNA splicing, via spliceosome), GO:0000398 (mRNA splicing, via spliceosome), GO:0000956 (nuclear-transcribed…			0.370722	0.516516		-0.390775	-0.318494	-0.177969				429.852	97.7174	22.5213	-0.74128	9.02219	65.0259	2.59456e-05	0.00122016	2.72861e-11	2.72559e-11	0.2	0.354767	0.0365232	-0.866025	-0.976879	0.0576689	0.00420562		650.123	719.469	382.677	402.441	443.817
ENSG00000140941	MAP1LC3B	PC	microtubule associated protein 1 light chain 3 beta	The product of this gene is a subunit of neuronal microtubule-associated MAP1A and MAP1B proteins, which are involved in microtubule assembly and important for neurogenesis. Studies on the rat homolog implicate a role for this gene in autophagy, a process that involves the bulk degradation of cytoplasmic component. [provided by RefSeq, Jul 2008]. Publication Note: This RefSeq record includes a su…	hsa04216 (Ferroptosis), GO:0000422 (mitochondrion degradation), GO:0006914 (autophagy), GO:0016236 (macroautophagy), GO:0061024 (membrane organization), GO:0097352 (autophagic vacuole maturation), GO:0000421 (autophagic vacuole membrane), GO:0005622 (intracellular), GO:0005739 (mitochondrion), GO:0005776 (autophagic vacuole), GO:0005829 (cytosol), GO:0005874 (microtubule), GO:0005930 (axoneme), G…			0.484272	0.384349		-0.32514	-0.297214	-0.246266				429.222	75.9816	30.3322	-0.748451	5.89199	64.8789	2.61739e-05	0.00122016	2.35309e-10	2.52393e-10	0.2	0.354767	0.0409118	-0.866025	-0.992167	0.0576689	0.000831229		80.9042	75.3565	45.3063	46.231	47.9646
ENSG00000166801	FAM111A	PC	family with sequence similarity 111 member A		GO:0006260 (DNA replication), GO:0045071 (negative regulation of viral genome replication), GO:0051607 (defense response to virus), GO:0000785 (chromatin), GO:0001650 (fibrillar center), GO:0005634 (nucleus), GO:0005737 (cytoplasm), GO:0005515 (protein binding)			0.599857	0.35683		-0.257357	-0.349665	-0.349665				429.181	79.6951	80.2896	-0.823636	6.17879	63.5978	2.82717e-05	0.00127179	5.24605e-11	5.46491e-11	0.138641	0.354767	0.117615	-0.888523	-0.96721	0.043925	0.0070924		106.1	89.3413	57.6731	53.9747	53.9747
ENSG00000108829	LRRC59	PC	leucine rich repeat containing 59		GO:0005635 (nuclear envelope), GO:0005783 (endoplasmic reticulum), GO:0005789 (endoplasmic reticulum membrane), GO:0016020 (membrane), GO:0016021 (integral component of membrane), GO:0031090 (organelle membrane), GO:0042645 (mitochondrial nucleoid), GO:0003723 (RNA binding), GO:0045296 (cadherin binding)			0.484297	0.31366		-0.272056	-0.29489	-0.231011				429.081	96.2013	59.9744	-0.671144	8.39274	64.846	2.62253e-05	0.00122016	1.06394e-10	1.07098e-10	0.2	0.354767	0.0954283	-0.866025	-0.978301	0.0576689	0.00382448		458.033	406.717	270.336	266.059	278.195
ENSG00000100196	KDELR3	PC	KDEL endoplasmic reticulum protein retention receptor 3	This gene encodes a member of the KDEL endoplasmic reticulum protein retention receptor family. Retention of resident soluble proteins in the lumen of the endoplasmic reticulum (ER) is achieved in both yeast and animal cells by their continual retrieval from the cis-Golgi, or a pre-Golgi compartment. Sorting of these proteins is dependent on a C-terminal tetrapeptide signal, usually lys-asp-glu-l…	hsa05110 (Vibrio cholerae infection), GO:0006621 (protein retention in ER lumen), GO:0006890 (retrograde vesicle-mediated transport, Golgi to ER), GO:0015031 (protein transport), GO:0036498 (NA), GO:0000139 (Golgi membrane), GO:0005783 (endoplasmic reticulum), GO:0005789 (endoplasmic reticulum membrane), GO:0016021 (integral component of membrane), GO:0030133 (transport vesicle), GO:0046923 (ER r…			0.651396	0.525223		-0.347337	-0.514866	-0.314416				428.653	56.3751	37.3509	-1.05789	4.65776	64.746	2.63824e-05	0.00122016	7.93733e-11	8.83385e-11	0.2	0.354767	0.0235062	-0.866025	-0.988925	0.0576689	0.00139671		38.025	34.6732	18.0301	15.8341	18.4924
ENSG00000104412	EMC2	PC	ER membrane protein complex subunit 2		GO:0034975 (protein folding in endoplasmic reticulum), GO:0005634 (nucleus), GO:0005737 (cytoplasm), GO:0005739 (mitochondrion), GO:0005783 (endoplasmic reticulum), GO:0072546 (ER membrane protein complex), GO:0005515 (protein binding)			0.528611	0.50845		-0.392296	-0.289885	-0.354881				428.623	59.1347	21.7547	-0.924535	4.82827	64.739	2.63934e-05	0.00122016	2.98846e-10	3.29365e-10	0.2	0.354767	6.62785e-05	-0.866025	-0.99819	0.0576689	9.24443e-05		39.6431	39.0652	19.9949	21.613	20.5728
ENSG00000128699	ORMDL1	PC	ORMDL sphingolipid biosynthesis regulator 1		GO:0006672 (ceramide metabolic process), GO:0090156 (cellular sphingolipid homeostasis), GO:1900060 (negative regulation of ceramide biosynthetic process), GO:0005783 (endoplasmic reticulum), GO:0005789 (endoplasmic reticulum membrane), GO:0016021 (integral component of membrane), GO:0035339 (SPOTS complex), R-HSA-1430728 (Homo sapiens: Metabolism), R-HSA-1660661 (Homo sapiens: Sphingolipid de no…			0.380676	0.384791		-0.260801	-0.267244	-0.237422				428.614	84.0048	46.7376	-0.651214	6.55049	64.7371	2.63965e-05	0.00122016	5.13263e-10	5.4272e-10	0.2	0.354767	2.70327e-05	-0.866025	-0.999666	0.0576689	7.31579e-06		119.391	119.738	75.8188	75.4721	77.0901
ENSG00000109332	UBE2D3	PC	ubiquitin conjugating enzyme E2 D3	The modification of proteins with ubiquitin is an important cellular mechanism for targeting abnormal or short-lived proteins for degradation. Ubiquitination involves at least three classes of enzymes: ubiquitin-activating enzymes, or E1s, ubiquitin-conjugating enzymes, or E2s, and ubiquitin-protein ligases, or E3s. This gene encodes a member of the E2 ubiquitin-conjugating enzyme family. This en…	hsa04120 (Ubiquitin mediated proteolysis), hsa04141 (Protein processing in endoplasmic reticulum), GO:0000122 (negative regulation of transcription from RNA polymerase II promoter), GO:0000209 (protein polyubiquitination), GO:0006281 (DNA repair), GO:0006464 (cellular protein modification process), GO:0006511 (ubiquitin-dependent protein catabolic process), GO:0006513 (protein monoubiquitination)…			0.612818	1.52969		-0.826981	-0.740723	-0.574808				427.552	67.3622	40.0681	-1.96193	5.31571	64.4896	2.67905e-05	0.00123352	1.75687e-14	1.99282e-14	0.2	0.354767	0.255303	-0.866025	-0.875969	0.0576689	0.0514491		48.8892	94.08	16.7587	17.9145	20.3416
ENSG00000228929	RPS13P2	p_Pg	ribosomal protein S13 pseudogene 2					0.873847	0.888336		-0.919881	-0.23852	-0.603782				426.995	57.823	3.08348	-1.55778	4.74491	64.3598	2.7e-05	0.00123831	2.46484e-13	2.79484e-13	0.2	0.354767	0.00588607	-0.866025	-0.984471	0.0576689	0.00231759		43.8038	44.2662	11.211	19.1859	14.4472
ENSG00000210194	MT-TE	Mt_tRNA	mitochondrially encoded tRNA glutamic acid					1.47316	0.800835		-1.07267	-0.434411	-0.766911				426.621	45.9331	0.195911	-2.19502	4.04074	64.2728	2.71416e-05	0.00123996	1.27093e-13	1.58147e-13	0.2	0.354767	0.185885	-0.866025	-0.923409	0.0576689	0.0251505		38.025	23.1155	4.85425	8.66831	6.47234
ENSG00000169733	RFNG	PC	RFNG O-fucosylpeptide 3-beta-N-acetylglucosaminyltransferase		hsa00514 (Other types of O-glycan biosynthesis), hsa04330 (Notch signaling pathway), hsa05165 (Human papillomavirus infection), GO:0007389 (pattern specification process), GO:0007399 (nervous system development), GO:0009887 (organ morphogenesis), GO:0030154 (cell differentiation), GO:0032092 (positive regulation of protein binding), GO:0045747 (positive regulation of Notch signaling pathway), GO:…			-0.401531	-0.461889		0.303821	0.235777	0.323822				426.25	78.2727	48.4412	0.743064	6.07181	64.1865	2.72829e-05	0.00124159	3.51719e-10	3.93667e-10	0.2	0.354767	0.000399974	0.866025	0.993741	0.0576689	0.000593809		48.7737	46.6933	80.7886	76.9746	81.9444
ENSG00000047849	MAP4	PC	microtubule associated protein 4	The protein encoded by this gene is a major non-neuronal microtubule-associated protein. This protein contains a domain similar to the microtubule-binding domains of neuronal microtubule-associated protein (MAP2) and microtubule-associated protein tau (MAPT/TAU). This protein promotes microtubule assembly, and has been shown to counteract destabilization of interphase microtubule catastrophe prom…	GO:0007052 (mitotic spindle organization), GO:0031175 (neuron projection development), GO:0051012 (microtubule sliding), GO:0051294 (establishment of spindle orientation), GO:0051301 (cell division), GO:1902856 (negative regulation of nonmotile primary cilium assembly), GO:0005737 (cytoplasm), GO:0005874 (microtubule), GO:0005875 (microtubule associated complex), GO:0005930 (axoneme), GO:0014069 …			-0.335461	-0.431726		0.233442	0.261761	0.271984				425.466	93.1352	85.3663	0.645251	7.68848	64.0044	2.75841e-05	0.00125045	3.58897e-10	3.46987e-10	0.2	0.354767	0.0201523	0.866025	0.995797	0.0576689	0.000326915		159.15	148.748	237.049	241.788	243.522
ENSG00000128944	KNSTRN	PC	kinetochore localized astrin (SPAG5) binding protein		GO:0000070 (mitotic sister chromatid segregation), GO:0007051 (spindle organization), GO:0007059 (chromosome segregation), GO:0051301 (cell division), GO:0051988 (regulation of attachment of spindle microtubules to kinetochore), GO:0000776 (kinetochore), GO:0000777 (condensed chromosome kinetochore), GO:0000922 (spindle pole), GO:0005634 (nucleus), GO:0005829 (cytosol), GO:0015630 (microtubule cy…			0.436666	0.352078		-0.18944	-0.289124	-0.31018				424.76	90.7929	24.3015	-0.665096	7.30647	63.8407	2.78586e-05	0.00125803	2.08249e-10	2.14005e-10	0.2	0.354767	0.0155702	-0.866025	-0.989693	0.0576689	0.00125409		209.08	197.06	134.763	125.633	123.783
ENSG00000127947	PTPN12	PC	protein tyrosine phosphatase, non-receptor type 12	The protein encoded by this gene is a member of the protein tyrosine phosphatase (PTP) family. PTPs are signaling molecules that regulate a variety of cellular processes including cell growth, differentiation, mitotic cycle, and oncogenic transformation. This PTP contains a C-terminal PEST motif, which serves as a protein-protein interaction domain, and may regulate protein intracellular half-lif…	GO:0006470 (protein dephosphorylation), GO:0035335 (peptidyl-tyrosine dephosphorylation), GO:0038128 (ERBB2 signaling pathway), GO:0042058 (regulation of epidermal growth factor receptor signaling pathway), GO:0042246 (tissue regeneration), GO:0071364 (cellular response to epidermal growth factor stimulus), GO:1901185 (negative regulation of ERBB signaling pathway), GO:2000587 (negative regulatio…			0.493927	0.483666		-0.252603	-0.35324	-0.371752				423.412	64.0065	21.0647	-0.86089	5.10319	63.5282	2.83915e-05	0.00127231	3.44281e-10	3.74125e-10	0.2	0.354767	0.000682851	-0.866025	-0.997025	0.0576689	0.000194747		46.9244	46.5777	27.1607	25.1959	24.8491
ENSG00000035403	VCL	PC	vinculin	Vinculin is a cytoskeletal protein associated with cell-cell and cell-matrix junctions, where it is thought to function as one of several interacting proteins involved in anchoring F-actin to the membrane. Defects in VCL are the cause of cardiomyopathy dilated type 1W. Dilated cardiomyopathy is a disorder characterized by ventricular dilation and impaired systolic function, resulting in congestiv…	hsa04510 (Focal adhesion), hsa04520 (Adherens junction), hsa04670 (Leukocyte transendothelial migration), hsa04810 (Regulation of actin cytoskeleton), hsa05100 (Bacterial invasion of epithelial cells), hsa05131 (Shigellosis), hsa05146 (Amoebiasis), GO:0002009 (morphogenesis of an epithelium), GO:0002576 (platelet degranulation), GO:0006928 (cellular component movement), GO:0006936 (muscle contrac…			0.522395	0.364967		-0.242301	-0.234643	-0.410419				423.075	90.7589	93.9012	-0.748618	7.30056	63.4501	2.85267e-05	0.00127351	4.785e-11	4.8803e-11	0.2	0.354767	0.0506833	-0.866025	-0.976964	0.0576689	0.00418242		219.366	196.482	128.291	128.984	113.959
ENSG00000174136	RGMB	PC	repulsive guidance molecule BMP co-receptor b	RGMB is a glycosylphosphatidylinositol (GPI)-anchored member of the repulsive guidance molecule family (see RGMA, MIM 607362) and contributes to the patterning of the developing nervous system (Samad et al., 2005 [PubMed 15671031]).[supplied by OMIM, Apr 2009].	GO:0007155 (cell adhesion), GO:0007165 (signal transduction), GO:0030509 (BMP signaling pathway), GO:0045893 (positive regulation of transcription, DNA-templated), GO:0005793 (endoplasmic reticulum-Golgi intermediate compartment), GO:0005886 (plasma membrane), GO:0045121 (membrane raft), GO:0046658 (anchored component of plasma membrane), GO:0015026 (coreceptor activity), GO:0042802 (identical pr…			0.373039	0.714051		-0.361971	-0.403758	-0.321361				422.178	75.7261	58.8245	-0.946861	5.87163	63.2425	2.88897e-05	0.00128483	2.07049e-11	2.12436e-11	0.2	0.354767	0.154478	-0.866025	-0.950786	0.0576689	0.0130086		72.1203	91.884	42.5325	41.2611	43.8038
ENSG00000143401	ANP32E	PC	acidic nuclear phosphoprotein 32 family member E		GO:0016569 (covalent chromatin modification), GO:0043086 (negative regulation of catalytic activity), GO:0043486 (histone exchange), GO:0000812 (Swr1 complex), GO:0005634 (nucleus), GO:0031410 (cytoplasmic vesicle), GO:0019212 (phosphatase inhibitor activity), GO:0042393 (histone binding)			0.471825	0.633973		-0.389029	-0.460006	-0.256764				421.574	61.792	54.9404	-0.980236	4.97439	63.1029	2.91372e-05	0.00129094	1.01902e-10	1.11347e-10	0.2	0.354767	0.0461219	-0.866025	-0.983209	0.0576689	0.00260521		41.7234	46.9244	22.0753	20.9195	24.3868
ENSG00000083312	TNPO1	PC	transportin 1	This gene encodes the beta subunit of the karyopherin receptor complex which interacts with nuclear localization signals to target nuclear proteins to the nucleus. The karyopherin receptor complex is a heterodimer of an alpha subunit which recognizes the nuclear localization signal and a beta subunit which docks the complex at nucleoporins. Alternate splicing of this gene results in two transcrip…	GO:0000060 (protein import into nucleus, translocation), GO:0006607 (NLS-bearing protein import into nucleus), GO:0006610 (ribosomal protein import into nucleus), GO:0016032 (viral process), GO:0035735 (intraciliary transport involved in cilium morphogenesis), GO:0043488 (regulation of mRNA stability), GO:0005634 (nucleus), GO:0005737 (cytoplasm), GO:0005829 (cytosol), GO:0005929 (cilium), GO:003…			0.380766	0.815835		-0.376275	-0.45648	-0.363846				421.006	79.6525	61.2947	-1.04118	6.17557	62.9719	2.93718e-05	0.00129458	4.44376e-12	4.4551e-12	0.2	0.354767	0.182249	-0.866025	-0.933077	0.0576689	0.0205727		88.3011	120.085	51.432	48.5425	51.8943
ENSG00000089063	TMEM230	PC	transmembrane protein 230		GO:0048489 (synaptic vesicle transport), GO:0005769 (early endosome), GO:0005770 (late endosome), GO:0005776 (autophagic vacuole), GO:0005783 (endoplasmic reticulum), GO:0005802 (trans-Golgi network), GO:0008021 (synaptic vesicle), GO:0016021 (integral component of membrane), GO:0030054 (cell junction), GO:0055037 (recycling endosome)			0.444582	0.76795		-0.547054	-0.240948	-0.42453				420.722	77.6765	46.8825	-1.04526	6.03057	62.9064	2.94899e-05	0.00129458	3.95009e-12	3.96361e-12	0.2	0.354767	0.117916	-0.866025	-0.953431	0.0576689	0.011979		83.5625	105.06	41.03	51.2008	44.844
ENSG00000157045	NTAN1	PC	N-terminal asparagine amidase	The protein encoded by this gene functions in a step-wise process of protein degradation through the N-end rule pathway. This protein acts as a tertiary destabilizing enzyme that deamidates N-terminal L-Asn residues on proteins to produce N-terminal L-Asp. L-Asp substrates are subsequently conjugated to L-Arg, which is recognized by specific E3 ubiquitin ligases and targeted to the proteasome. Ps…	GO:0007613 (memory), GO:0008344 (adult locomotory behavior), GO:0005634 (nucleus), GO:0005737 (cytoplasm), GO:0008418 (protein-N-terminal asparagine amidohydrolase activity)			0.570675	0.355218		-0.248218	-0.311576	-0.366099				420.578	80.2402	16.4651	-0.795387	6.21874	62.8731	2.95502e-05	0.00129458	8.76784e-11	9.16408e-11	0.2	0.354767	0.103464	-0.866025	-0.971675	0.0576689	0.00569819		107.14	91.9996	59.8691	57.2108	55.0149
ENSG00000170242	USP47	PC	ubiquitin specific peptidase 47		GO:0006284 (base-excision repair), GO:0006511 (ubiquitin-dependent protein catabolic process), GO:0006974 (cellular response to DNA damage stimulus), GO:0010972 (negative regulation of G2/M transition of mitotic cell cycle), GO:0016579 (protein deubiquitination), GO:0030307 (positive regulation of cell growth), GO:0034644 (cellular response to UV), GO:0035520 (monoubiquitinated protein deubiquiti…			0.420337	0.370664		-0.262656	-0.282389	-0.245955				418.335	79.5077	87.7598	-0.677453	6.16073	62.3566	3.0505e-05	0.00133145	9.22301e-10	9.86483e-10	0.2	0.354767	0.020567	-0.866025	-0.997776	0.0576689	0.000125867		93.6177	90.3815	57.5576	56.7485	58.251
ENSG00000166340	TPP1	PC	tripeptidyl peptidase 1	This gene encodes a member of the sedolisin family of serine proteases. The protease functions in the lysosome to cleave N-terminal tripeptides from substrates, and has weaker endopeptidase activity. It is synthesized as a catalytically-inactive enzyme which is activated and auto-proteolyzed upon acidification. Mutations in this gene result in late-infantile neuronal ceroid lipofuscinosis, which …	hsa04142 (Lysosome), GO:0006508 (proteolysis), GO:0006629 (lipid metabolic process), GO:0007040 (lysosome organization), GO:0007399 (nervous system development), GO:0007417 (central nervous system development), GO:0030163 (protein catabolic process), GO:0030855 (epithelial cell differentiation), GO:0036498 (NA), GO:0043171 (peptide catabolic process), GO:0045453 (bone resorption), GO:0050885 (neu…			0.609951	0.327718		-0.352004	-0.313398	-0.272267				415.972	87.2839	19.6848	-0.801244	6.86992	61.8141	3.15492e-05	0.0013696	5.24776e-11	5.36948e-11	0.2	0.354767	0.142212	-0.866025	-0.956998	0.0576689	0.0106353		172.326	141.351	87.4921	89.9192	92.5775
ENSG00000115963	RND3	PC	Rho family GTPase 3	This gene encodes a protein which is a member of the small GTPase protein superfamily. The encoded protein binds only GTP but has no GTPase activity, and appears to act as a negative regulator of cytoskeletal organization leading to loss of adhesion. Multiple alternatively spliced variants, encoding the same protein, have been identified. [provided by RefSeq, Dec 2011].	GO:0007155 (cell adhesion), GO:0007264 (small GTPase mediated signal transduction), GO:0030036 (actin cytoskeleton organization), GO:0000139 (Golgi membrane), GO:0005925 (focal adhesion), GO:0070062 (extracellular vesicular exosome), GO:0003924 (GTPase activity), GO:0005515 (protein binding), GO:0005525 (GTP binding)			0.392807	0.943005		-0.459093	-0.444244	-0.432474				415.731	81.884	38.0494	-1.16767	6.35331	61.7587	3.16583e-05	0.0013696	1.54645e-12	1.52471e-12	0.2	0.354767	0.211485	-0.866025	-0.91342	0.0576689	0.0301811		98.8187	145.628	53.8591	54.437	54.8993
ENSG00000166250	CLMP	PC	CXADR like membrane protein	The CTX (see VSIG2, MIM 606011) family of proteins, including ASAM, are type I transmembrane proteins within the Ig superfamily that localize to junctional complexes between endothelial and epithelial cells and may play a role in cell-cell adhesion (Raschperger et al., 2004 [PubMed 14573622]).[supplied by OMIM, Mar 2008]. Publication Note: This RefSeq record includes a subset of the publications …	GO:0048565 (digestive tract development), GO:0005881 (cytoplasmic microtubule), GO:0005886 (plasma membrane), GO:0005923 (tight junction), GO:0009986 (cell surface), GO:0016021 (integral component of membrane), GO:0070062 (extracellular vesicular exosome)			0.489873	0.91047		-0.478497	-0.455096	-0.466749				415.574	50.4812	65.2726	-1.30724	4.3014	61.7228	3.17292e-05	0.0013696	7.13572e-11	8.08699e-11	0.2	0.354767	0.161148	-0.866025	-0.948438	0.0576689	0.0139456		25.6582	35.02	12.1356	12.3668	12.2512
ENSG00000119383	PTPA	PC	protein phosphatase 2 phosphatase activator	Protein phosphatase 2A is one of the four major Ser/Thr phosphatases and is implicated in the negative control of cell growth and division. Protein phosphatase 2A holoenzymes are heterotrimeric proteins composed of a structural subunit A, a catalytic subunit C, and a regulatory subunit B. The regulatory subunit is encoded by a diverse set of genes that have been grouped into the B/PR55, B_/PR61, …	hsa04931 (Insulin resistance), GO:0000413 (protein peptidyl-prolyl isomerization), GO:0030472 (mitotic spindle organization in nucleus), GO:0032515 (negative regulation of phosphoprotein phosphatase activity), GO:0032516 (positive regulation of phosphoprotein phosphatase activity), GO:0035307 (positive regulation of protein dephosphorylation), GO:0035308 (negative regulation of protein dephosphor…			-0.580471	-0.32459		0.287097	0.298397	0.319567				414.479	94.1487	43.6712	0.755587	7.87448	61.4722	3.22299e-05	0.00138505	7.7248e-11	7.56242e-11	0.2	0.354767	0.07827	0.866025	0.985561	0.0576689	0.00207821		151.06	180.763	277.27	279.466	283.627
ENSG00000005801	ZNF195	PC	zinc finger protein 195	This gene encodes a protein belonging to the Krueppel C2H2-type zinc-finger protein family. These family members are transcription factors that are implicated in a variety of cellular processes. This gene is located near the centromeric border of chromosome 11p15.5, next to an imprinted domain that is associated with maternal-specific loss of heterozygosity in Wilms_ tumors. Alternative splicing …	GO:0006351 (transcription, DNA-templated), GO:0006355 (regulation of transcription, DNA-templated), GO:0005634 (nucleus), GO:0003677 (DNA binding), GO:0008270 (zinc ion binding), R-HSA-212436 (Homo sapiens: Generic Transcription Pathway), R-HSA-74160 (Homo sapiens: Gene Expression)			0.525203	0.416406		-0.334773	-0.306238	-0.300598				414.278	65.1989	30.4003	-0.828916	5.17326	61.4262	3.23228e-05	0.00138505	8.33717e-10	9.00837e-10	0.2	0.354767	0.0542184	-0.866025	-0.993104	0.0576689	0.000686742		50.5073	46.6933	26.9295	27.5074	27.623
ENSG00000180228	PRKRA	PC	protein activator of interferon induced protein kinase EIF2AK2	This gene encodes a protein kinase activated by double-stranded RNA which mediates the effects of interferon in response to viral infection. Mutations in this gene have been associated with dystonia. Alternative splicing results in multiple transcript variants. [provided by RefSeq, Nov 2008].	GO:0006468 (protein phosphorylation), GO:0006955 (immune response), GO:0008285 (negative regulation of cell proliferation), GO:0009615 (response to virus), GO:0030422 (production of siRNA involved in RNA interference), GO:0031047 (gene silencing by RNA), GO:0031054 (pre-miRNA processing), GO:0034599 (cellular response to oxidative stress), GO:0035196 (production of miRNAs involved in gene silenci…			0.420774	0.609738		-0.420707	-0.31076	-0.299045				413.603	64.4834	25.2896	-0.909963	5.1301	61.2718	3.26371e-05	0.00139207	2.85844e-10	3.09296e-10	0.2	0.354767	0.0794567	-0.866025	-0.980311	0.0576689	0.0033066		45.0752	51.6631	24.2713	26.3517	26.5828
ENSG00000189266	PNRC2	PC	proline rich nuclear receptor coactivator 2		GO:0000184 (nuclear-transcribed mRNA catabolic process, nonsense-mediated decay), GO:0006351 (transcription, DNA-templated), GO:0006355 (regulation of transcription, DNA-templated), GO:0031087 (deadenylation-independent decapping of nuclear-transcribed mRNA), GO:0000932 (cytoplasmic mRNA processing body), GO:0005634 (nucleus), GO:0005654 (nucleoplasm), GO:0005794 (Golgi apparatus), GO:0005829 (cy…			0.419843	0.879934		-0.393679	-0.475314	-0.430784				413.327	65.7695	20.707	-1.1619	5.20886	61.2088	3.27665e-05	0.00139207	1.66356e-11	1.79414e-11	0.2	0.354767	0.182609	-0.866025	-0.933624	0.0576689	0.0203225		45.9998	64.0299	25.3115	23.8089	24.618
ENSG00000183779	ZNF703	PC	zinc finger protein 703		GO:0006351 (transcription, DNA-templated), GO:0006355 (regulation of transcription, DNA-templated), GO:0008284 (positive regulation of cell proliferation), GO:0010718 (positive regulation of epithelial to mesenchymal transition), GO:0017015 (regulation of transforming growth factor beta receptor signaling pathway), GO:0030335 (positive regulation of cell migration), GO:0033601 (positive regulatio…			-0.582778	-0.389112		0.290585	0.308887	0.372418				413.166	73.1539	92.8876	0.841648	5.70007	61.172	3.28425e-05	0.00139207	2.06503e-10	2.3609e-10	0.2	0.354767	0.0267256	0.866025	0.989433	0.0576689	0.00130194		32.5928	37.5627	61.3716	62.1807	65.0701
ENSG00000144136	SLC20A1	PC	solute carrier family 20 member 1	The protein encoded by this gene is a sodium-phosphate symporter that absorbs phosphate from interstitial fluid for use in cellular functions such as metabolism, signal transduction, and nucleic acid and lipid synthesis. The encoded protein is also a retroviral receptor, causing human cells to be susceptible to infection by gibbon ape leukemia virus, simian sarcoma-associated virus, feline leukem…	GO:0006796 (phosphate-containing compound metabolic process), GO:0006810 (transport), GO:0006811 (ion transport), GO:0007165 (signal transduction), GO:0035435 (phosphate ion transmembrane transport), GO:0035725 (sodium ion transmembrane transport), GO:0043123 (positive regulation of I-kappaB kinase/NF-kappaB signaling), GO:0044341 (sodium-dependent phosphate transport), GO:0005886 (plasma membran…			0.583118	0.375905		-0.229892	-0.463765	-0.265366				412.451	92.0109	38.6882	-0.808159	7.47845	61.0088	3.31815e-05	0.00140138	3.3319e-11	3.36901e-11	0.2	0.354767	0.0719123	-0.866025	-0.966985	0.0576689	0.00716541		257.16	222.487	145.512	123.437	141.929
ENSG00000261061	AC092718.4	sense_intronic						0.855621	0.503176		-0.288596	-0.595498	-0.474703				411.632	59.3561	10.4344	-1.21939	4.8388	60.8222	3.35745e-05	0.0014129	2.03087e-11	2.23448e-11	0.2	0.354767	0.124269	-0.866025	-0.955069	0.0576689	0.0113553		48.6581	37.6782	20.9195	16.5276	18.1457
ENSG00000171634	BPTF	PC	bromodomain PHD finger transcription factor	This gene was identified by the reactivity of its encoded protein to a monoclonal antibody prepared against brain homogenates from patients with Alzheimer_s disease. Analysis of the original protein (fetal Alz-50 reactive clone 1, or FAC1), identified as an 810 aa protein containing a DNA-binding domain and a zinc finger motif, suggested it might play a role in the regulation of transcription. Hi…	GO:0000122 (negative regulation of transcription from RNA polymerase II promoter), GO:0001892 (embryonic placenta development), GO:0006338 (chromatin remodeling), GO:0006351 (transcription, DNA-templated), GO:0006355 (regulation of transcription, DNA-templated), GO:0007420 (brain development), GO:0007492 (endoderm development), GO:0009611 (response to wounding), GO:0009952 (anterior/posterior pat…			0.48766	0.813809		-0.45459	-0.358945	-0.487934				411.187	51.4351	90.1704	-1.20184	4.3659	60.7208	3.37905e-05	0.00141691	1.58441e-10	1.78418e-10	0.2	0.354767	0.129156	-0.866025	-0.963276	0.0576689	0.00840136		27.1607	34.5576	13.1758	14.216	12.8291
ENSG00000105176	URI1	PC	URI1, prefoldin like chaperone	This gene encodes member of the prefoldin family of molecular chaperones. The encoded protein functions as a scaffolding protein and plays roles in ubiquitination and transcription, in part though interactions with the RNA polymerase II subunit RPB5. This gene may play a role in multiple malignancies including ovarian cancer and hepatocellular carcinoma. Alternatively spliced transcript variants …	GO:0000122 (negative regulation of transcription from RNA polymerase II promoter), GO:0001558 (regulation of cell growth), GO:0006351 (transcription, DNA-templated), GO:0006357 (regulation of transcription from RNA polymerase II promoter), GO:0009615 (response to virus), GO:0010923 (negative regulation of phosphatase activity), GO:0071363 (cellular response to growth factor stimulus), GO:0071383 …			0.496251	0.398213		-0.275002	-0.309731	-0.309731				411.044	67.8733	24.8467	-0.782398	5.34964	59.5003	3.65288e-05	0.00146377	1.54872e-09	1.65855e-09	0.138641	0.354767	0.0492578	-0.888523	-0.993809	0.043925	0.000584275		56.055	52.241	32.0149	31.2059	31.2059
ENSG00000256028	AC026362.1	processed_transcript						-0.511955	-0.370159		0.251138	0.325983	0.304992				410.559	77.3869	98.9353	0.758803	6.00067	60.5779	3.40976e-05	0.00142311	5.46224e-10	6.12689e-10	0.2	0.354767	0.0161067	0.866025	0.991814	0.0576689	0.000887986		42.7636	47.3867	73.9695	78.0148	76.859
ENSG00000123219	CENPK	PC	centromere protein K	CENPK is a subunit of a CENPH (MIM 605607)-CENPI (MIM 300065)-associated centromeric complex that targets CENPA (MIM 117139) to centromeres and is required for proper kinetochore function and mitotic progression (Okada et al., 2006 [PubMed 16622420]).[supplied by OMIM, Mar 2008].	GO:0007062 (sister chromatid cohesion), GO:0034080 (CENP-A containing nucleosome assembly), GO:0000777 (condensed chromosome kinetochore), GO:0005654 (nucleoplasm), GO:0005829 (cytosol), GO:0005515 (protein binding), R-HSA-162582 (Homo sapiens: Signal Transduction), R-HSA-1640170 (Homo sapiens: Cell Cycle), R-HSA-194315 (Homo sapiens: Signaling by Rho GTPases), R-HSA-195258 (Homo sapiens: RHO GTP…			0.391208	0.834643		-0.487354	-0.327635	-0.410862				410.291	76.7567	19.063	-1.07088	5.9541	60.5169	3.42299e-05	0.00142311	9.23162e-12	9.23699e-12	0.2	0.354767	0.180853	-0.866025	-0.931669	0.0576689	0.0212208		76.0499	104.135	40.4521	45.4219	42.7636
ENSG00000100280	AP1B1	PC	adaptor related protein complex 1 subunit beta 1	Adaptor protein complex 1 is found at the cytoplasmic face of coated vesicles located at the Golgi complex, where it mediates both the recruitment of clathrin to the membrane and the recognition of sorting signals within the cytosolic tails of transmembrane receptors. This complex is a heterotetramer composed of two large, one medium, and one small adaptin subunit. The protein encoded by this gen…	hsa04142 (Lysosome), hsa05170 (Human immunodeficiency virus 1 infection), GO:0006886 (intracellular protein transport), GO:0007368 (determination of left/right symmetry), GO:0007507 (heart development), GO:0016192 (vesicle-mediated transport), GO:0019886 (antigen processing and presentation of exogenous peptide antigen via MHC class II), GO:0050690 (regulation of defense response to virus by viru…			-0.471629	-0.369433		0.251876	0.310662	0.278525				410.02	78.4771	86.0903	0.722661	6.08316	60.4554	3.43638e-05	0.00142311	9.86673e-10	1.10008e-09	0.2	0.354767	0.0097521	0.866025	0.99501	0.0576689	0.000422767		46.8089	50.3918	78.5926	81.9444	80.0952
ENSG00000111799	COL12A1	PC	collagen type XII alpha 1 chain	This gene encodes the alpha chain of type XII collagen, a member of the FACIT (fibril-associated collagens with interrupted triple helices) collagen family. Type XII collagen is a homotrimer found in association with type I collagen, an association that is thought to modify the interactions between collagen I fibrils and the surrounding matrix. Alternatively spliced transcript variants encoding d…	hsa04974 (Protein digestion and absorption), GO:0001501 (skeletal system development), GO:0007155 (cell adhesion), GO:0030199 (collagen fibril organization), GO:0030574 (collagen catabolic process), GO:0035987 (endodermal cell differentiation), GO:0005576 (extracellular region), GO:0005595 (collagen type XII trimer), GO:0005615 (extracellular space), GO:0005788 (endoplasmic reticulum lumen), GO:0…			0.559201	0.327142		-0.255609	-0.348812	-0.281922				409.9	85.2057	98.3646	-0.757282	6.6571	60.4282	3.44233e-05	0.00142311	1.6989e-10	1.75652e-10	0.2	0.354767	0.119425	-0.866025	-0.966595	0.0576689	0.00729234		144.241	122.512	81.1353	75.9344	79.6328
ENSG00000120802	TMPO	PC	thymopoietin	The protein encoded by this gene resides in the nucleus and may play a role in the assembly of the nuclear lamina, and thus help maintain the structural organization of the nuclear envelope. It may function as a receptor for the attachment of lamin filaments to the inner nuclear membrane. Mutations in this gene are associated with dilated cardiomyopathy. Alternatively spliced transcript variants …	GO:0006355 (regulation of transcription, DNA-templated), GO:0000785 (chromatin), GO:0005634 (nucleus), GO:0005635 (nuclear envelope), GO:0003677 (DNA binding), GO:0005521 (lamin binding), GO:0045296 (cadherin binding), R-HSA-1640170 (Homo sapiens: Cell Cycle), R-HSA-2555396 (Homo sapiens: Mitotic Metaphase and Anaphase), R-HSA-2980766 (Homo sapiens: Nuclear Envelope Breakdown), R-HSA-2993913 (Hom…			0.341935	0.46267		-0.259244	-0.301734	-0.243628				408.898	80.7086	51.4566	-0.688833	6.25893	60.2005	3.49258e-05	0.00143369	9.78022e-10	1.03664e-09	0.2	0.354767	0.0636653	-0.866025	-0.988653	0.0576689	0.00144848		94.6579	103.095	61.7183	59.8691	62.4118
ENSG00000117862	TXNDC12	PC	thioredoxin domain containing 12	This gene encodes a member of the thioredoxin superfamily. Members of this family are characterized by a conserved active motif called the thioredoxin fold that catalyzes disulfide bond formation and isomerization. This protein localizes to the endoplasmic reticulum and has a single atypical active motif. The encoded protein is mainly involved in catalyzing native disulfide bond formation and dis…	hsa00480 (Glutathione metabolism), GO:0030154 (cell differentiation), GO:0045454 (cell redox homeostasis), GO:0055114 (oxidation-reduction process), GO:1902236 (negative regulation of endoplasmic reticulum stress-induced intrinsic apoptotic signaling pathway), GO:0005788 (endoplasmic reticulum lumen), GO:0005515 (protein binding), GO:0015037 (peptide disulfide oxidoreductase activity), GO:0019153…			0.316531	0.507236		-0.230804	-0.289018	-0.303945				408.847	88.0419	25.1363	-0.700103	6.96961	60.1889	3.49517e-05	0.00143369	3.50201e-10	3.61095e-10	0.2	0.354767	0.103508	-0.866025	-0.974257	0.0576689	0.00493907		151.753	173.482	103.211	99.0498	98.0097
ENSG00000154845	PPP4R1	PC	protein phosphatase 4 regulatory subunit 1	This gene encodes one of several alternate regulatory subunits of serine/threonine protein phosphatase 4 (PP4). The protein features multiple HEAT repeats. This protein forms a complex with PP4RC. This complex may have a distinct role from other PP4 complexes, including regulation of HDAC3 (Zhang et al., PMID: 15805470). There is also a transcribed pseudogene on chromosome 20. Alternative splicin…	GO:0006468 (protein phosphorylation), GO:0006470 (protein dephosphorylation), GO:0007165 (signal transduction), GO:0050790 (regulation of catalytic activity), GO:0030289 (protein phosphatase 4 complex), GO:0004721 (phosphoprotein phosphatase activity), GO:0005515 (protein binding), GO:0019888 (protein phosphatase regulator activity)			0.396857	0.386633		-0.324376	-0.261008	-0.198106				408.662	83.0168	20.3152	-0.66666	6.45108	60.1468	3.50455e-05	0.00143369	1.00204e-09	1.05741e-09	0.2	0.354767	0.00129494	-0.866025	-0.995072	0.0576689	0.000415011		112.572	111.763	67.4972	70.6178	73.854
ENSG00000100994	PYGB	PC	glycogen phosphorylase B	The protein encoded by this gene is a glycogen phosphorylase found predominantly in the brain. The encoded protein forms homodimers which can associate into homotetramers, the enzymatically active form of glycogen phosphorylase. The activity of this enzyme is positively regulated by AMP and negatively regulated by ATP, ADP, and glucose-6-phosphate. This enzyme catalyzes the rate-determining step …	hsa00500 (Starch and sucrose metabolism), hsa01100 (Metabolic pathways), hsa04217 (Necroptosis), hsa04910 (Insulin signaling pathway), hsa04922 (Glucagon signaling pathway), hsa04931 (Insulin resistance), GO:0005980 (glycogen catabolic process), GO:0043312 (neutrophil degranulation), GO:0005576 (extracellular region), GO:0005737 (cytoplasm), GO:0016020 (membrane), GO:0035578 (azurophil granule lu…			-0.380342	-0.419447		0.280191	0.190278	0.329321				408.297	87.5053	69.1652	0.679569	6.89956	60.064	3.52313e-05	0.00143629	8.08737e-10	7.51224e-10	0.2	0.354767	0.00326356	0.866025	0.985573	0.0576689	0.00207564		88.7635	86.3363	141.467	132.798	146.437
ENSG00000228716	DHFR	PC	dihydrofolate reductase	Dihydrofolate reductase converts dihydrofolate into tetrahydrofolate, a methyl group shuttle required for the de novo synthesis of purines, thymidylic acid, and certain amino acids. While the functional dihydrofolate reductase gene has been mapped to chromosome 5, multiple intronless processed pseudogenes or dihydrofolate reductase-like genes have been identified on separate chromosomes. Dihydrof…	hsa00670 (One carbon pool by folate), hsa00790 (Folate biosynthesis), hsa01100 (Metabolic pathways), hsa01523 (Antifolate resistance), GO:0000082 (G1/S transition of mitotic cell cycle), GO:0000083 (regulation of transcription involved in G1/S transition of mitotic cell cycle), GO:0006545 (glycine biosynthetic process), GO:0006729 (tetrahydrobiopterin biosynthetic process), GO:0006730 (one-carbon…			0.56359	0.339654		-0.359268	-0.236209	-0.307766				407.58	82.131	54.983	-0.774226	6.37075	59.9017	3.55991e-05	0.00144626	1.97965e-10	2.0606e-10	0.2	0.354767	0.109368	-0.866025	-0.968289	0.0576689	0.00674625		118.582	101.246	61.6028	67.2661	63.9143
ENSG00000198804	MT-CO1	PC	mitochondrially encoded cytochrome c oxidase I		hsa00190 (Oxidative phosphorylation), hsa01100 (Metabolic pathways), hsa04260 (Cardiac muscle contraction), hsa04714 (Thermogenesis), hsa04932 (Non-alcoholic fatty liver disease (NAFLD)), hsa05010 (Alzheimer disease), hsa05012 (Parkinson disease), hsa05016 (Huntington disease), R-HSA-1428517 (Homo sapiens: The citric acid (TCA) cycle and respiratory electron transport), R-HSA-1430728 (Homo sapien…			0.419629	0.534227		-0.327716	-0.185577	-0.440563				406.92	99.9744	55.8773	-0.792378	13.4185	59.7521	3.59422e-05	0.00145516	5.18252e-10	5.13761e-10	0.2	0.354767	0.0115986	-0.866025	-0.980901	0.0576689	0.00315937		14085.7	15250.3	8390	9258.91	7758.6
ENSG00000162434	JAK1	PC	Janus kinase 1	Janus kinase 1 (JAK1), is a member of a new class of protein-tyrosine kinases (PTK) characterized by the presence of a second phosphotransferase-related domain immediately N-terminal to the PTK domain. The second phosphotransferase domain bears all the hallmarks of a protein kinase, although its structure differs significantly from that of the PTK and threonine/serine kinase family members. JAK1 …	hsa01521 (EGFR tyrosine kinase inhibitor resistance), hsa04151 (PI3K-Akt signaling pathway), hsa04217 (Necroptosis), hsa04380 (Osteoclast differentiation), hsa04550 (Signaling pathways regulating pluripotency of stem cells), hsa04621 (NOD-like receptor signaling pathway), hsa04630 (JAK-STAT signaling pathway), hsa04658 (Th1 and Th2 cell differentiation), hsa04659 (Th17 cell differentiation), hsa0…			0.424221	0.362714		-0.333147	-0.223517	-0.230271				406.169	82.9997	44.9233	-0.670035	6.44573	59.5824	3.63363e-05	0.00146277	1.08089e-09	1.13958e-09	0.2	0.354767	0.00475146	-0.866025	-0.992778	0.0576689	0.000735936		114.306	109.452	66.8037	72.2359	71.8892
ENSG00000171867	PRNP	PC	prion protein	The protein encoded by this gene is a membrane glycosylphosphatidylinositol-anchored glycoprotein that tends to aggregate into rod-like structures. The encoded protein contains a highly unstable region of five tandem octapeptide repeats. This gene is found on chromosome 20, approximately 20 kbp upstream of a gene which encodes a biochemically and structurally similar protein to the one encoded by…	hsa04216 (Ferroptosis), hsa05020 (Prion diseases), GO:0001933 (negative regulation of protein phosphorylation), GO:0006878 (cellular copper ion homeostasis), GO:0006979 (response to oxidative stress), GO:0007050 (cell cycle arrest), GO:0007165 (signal transduction), GO:0007616 (long-term memory), GO:0008152 (metabolic process), GO:0010955 (negative regulation of protein processing), GO:0031648 (p…			0.378634	0.757326		-0.449487	-0.40036	-0.286113				406.088	76.4756	63.5775	-0.988889	5.93132	59.564	3.63793e-05	0.00146277	2.89867e-11	2.94471e-11	0.2	0.354767	0.161915	-0.866025	-0.94192	0.0576689	0.0166554		75.0097	98.1252	41.3767	42.8792	46.5777
ENSG00000070831	CDC42	PC	cell division cycle 42	The protein encoded by this gene is a small GTPase of the Rho-subfamily, which regulates signaling pathways that control diverse cellular functions including cell morphology, migration, endocytosis and cell cycle progression. This protein is highly similar to Saccharomyces cerevisiae Cdc 42, and is able to complement the yeast cdc42-1 mutant. The product of oncogene Dbl was reported to specifical…	hsa04010 (MAPK signaling pathway), hsa04014 (Ras signaling pathway), hsa04015 (Rap1 signaling pathway), hsa04062 (Chemokine signaling pathway), hsa04144 (Endocytosis), hsa04360 (Axon guidance), hsa04370 (VEGF signaling pathway), hsa04510 (Focal adhesion), hsa04520 (Adherens junction), hsa04530 (Tight junction), hsa04660 (T cell receptor signaling pathway), hsa04666 (Fc gamma R-mediated phagocytos…			0.413686	0.352967		-0.17735	-0.330606	-0.258697				404.34	91.1847	52.5639	-0.645459	7.36084	59.1693	3.73181e-05	0.00149031	8.07783e-10	8.28148e-10	0.2	0.354767	0.0024127	-0.866025	-0.98964	0.0576689	0.00126392		213.934	205.034	141.351	126.904	133.492
ENSG00000137563	GGH	PC	gamma-glutamyl hydrolase	This gene catalyzes the hydrolysis of folylpoly-gamma-glutamates and antifolylpoly-gamma-glutamates by the removal of gamma-linked polyglutamates and glutamate. [provided by RefSeq, Jul 2008]. Publication Note: This RefSeq record includes a subset of the publications that are available for this gene. Please see the Gene record to access additional publications.	hsa00790 (Folate biosynthesis), hsa01523 (Antifolate resistance), GO:0006508 (proteolysis), GO:0006541 (glutamine metabolic process), GO:0010043 (response to zinc ion), GO:0032868 (response to insulin), GO:0042493 (response to drug), GO:0043312 (neutrophil degranulation), GO:0045471 (response to ethanol), GO:0005576 (extracellular region), GO:0005615 (extracellular space), GO:0005634 (nucleus), G…			0.365112	0.346942		-0.233025	-0.22821	-0.25082				403.975	87.7779	11.9506	-0.602868	6.93868	59.0871	3.75174e-05	0.00149076	2.76165e-09	2.87795e-09	0.2	0.354767	0.00215094	-0.866025	-0.999491	0.0576689	1.37748e-05		154.989	153.025	101.708	102.055	100.437
ENSG00000121892	PDS5A	PC	PDS5 cohesin associated factor A	The protein encoded by this gene binds to the cohesin complex and associates with chromatin through most of the cell cycle. The encoded protein may play a role in regulating sister chromatid cohesion during mitosis. Two transcript variants encoding different isoforms have been found for this gene. [provided by RefSeq, May 2010].	GO:0006281 (DNA repair), GO:0007062 (sister chromatid cohesion), GO:0007064 (mitotic sister chromatid cohesion), GO:0008156 (negative regulation of DNA replication), GO:0051301 (cell division), GO:0000775 (chromosome, centromeric region), GO:0000785 (chromatin), GO:0005634 (nucleus), GO:0005654 (nucleoplasm), GO:0005694 (chromosome), GO:0005829 (cytosol), GO:0005886 (plasma membrane), GO:0005515 …			0.47035	0.474089		-0.272107	-0.342714	-0.329617				403.855	61.9283	66.5247	-0.836303	4.98074	59.06	3.75832e-05	0.00149076	2.09759e-09	2.28275e-09	0.2	0.354767	0.000337325	-0.866025	-0.998906	0.0576689	4.34347e-05		42.5325	42.6481	24.618	23.3466	23.5778
ENSG00000100401	RANGAP1	PC	Ran GTPase activating protein 1	This gene encodes a protein that associates with the nuclear pore complex and participates in the regulation of nuclear transport. The encoded protein interacts with Ras-related nuclear protein 1 (RAN) and regulates guanosine triphosphate (GTP)-binding and exchange. Alternative splicing results in multiple transcript variants. [provided by RefSeq, Jul 2013].	hsa03013 (RNA transport), GO:0007062 (sister chromatid cohesion), GO:0007165 (signal transduction), GO:0016925 (protein sumoylation), GO:0043547 (positive regulation of GTPase activity), GO:0046826 (negative regulation of protein export from nucleus), GO:0048678 (response to axon injury), GO:1904117 (NA), GO:0000776 (kinetochore), GO:0000777 (condensed chromosome kinetochore), GO:0000922 (spindle…			-0.630926	-0.329402		0.271694	0.341956	0.346678				402.062	93.9784	72.1465	0.80044	7.83996	58.6563	3.85833e-05	0.00152528	8.46731e-11	8.33151e-11	0.2	0.354767	0.0716309	0.866025	0.979899	0.0576689	0.00341079		141.698	175.1	266.637	280.044	280.969
ENSG00000140859	KIFC3	PC	kinesin family member C3	KIFC3 belongs to the large superfamily of kinesins, molecular motors that use the energy of ATP hydrolysis to translocate cargoes along microtubules. Members share extensive homology within a globular domain containing the microtubule- and ATP-binding sites and have a coiled-coil stalk domain that mediates oligomerization. Different kinesin family members participate in specific and diverse motil…	GO:0007018 (microtubule-based movement), GO:0007030 (Golgi organization), GO:0007601 (visual perception), GO:0045218 (zonula adherens maintenance), GO:0090136 (epithelial cell-cell adhesion), GO:0005794 (Golgi apparatus), GO:0005813 (centrosome), GO:0005871 (kinesin complex), GO:0005874 (microtubule), GO:0005915 (zonula adherens), GO:0030659 (cytoplasmic vesicle membrane), GO:0070062 (extracellul…			-0.607595	-0.336035		0.27482	0.308485	0.360325				401.826	87.5394	43.2027	0.794756	6.90457	58.6033	3.8717e-05	0.00152542	1.25303e-10	1.15362e-10	0.2	0.354767	0.0607708	0.866025	0.981969	0.0576689	0.00289851		75.0097	90.9594	139.964	143.316	148.633
ENSG00000115816	CEBPZ	PC	CCAAT enhancer binding protein zeta		GO:0006366 (transcription from RNA polymerase II promoter), GO:0045944 (positive regulation of transcription from RNA polymerase II promoter), GO:0005634 (nucleus), GO:0000978 (RNA polymerase II core promoter proximal region sequence-specific DNA binding), GO:0001077 (RNA polymerase II core promoter proximal region sequence-specific DNA binding transcription factor activity involved in positive r…			0.401067	0.500332		-0.344635	-0.263422	-0.293343				400.97	67.5155	55.3578	-0.788732	5.32822	58.4112	3.92065e-05	0.00153955	1.77436e-09	1.90048e-09	0.2	0.354767	0.0391303	-0.866025	-0.99267	0.0576689	0.000752441		51.5475	55.3616	29.9346	31.7838	31.0903
ENSG00000075188	NUP37	PC	nucleoporin 37	Bidirectional transport of macromolecules between the cytoplasm and nucleus occurs through nuclear pore complexes (NPCs) embedded in the nuclear envelope. NPCs are composed of subcomplexes, and NUP37 is part of one such subcomplex, Nup107-160 (Loiodice et al., 2004 [PubMed 15146057]).[supplied by OMIM, Mar 2008].	hsa03013 (RNA transport), GO:0006406 (mRNA export from nucleus), GO:0006409 (tRNA export from nucleus), GO:0007062 (sister chromatid cohesion), GO:0007067 (mitotic nuclear division), GO:0007077 (mitotic nuclear envelope disassembly), GO:0010827 (regulation of glucose transport), GO:0016032 (viral process), GO:0016925 (protein sumoylation), GO:0019083 (viral transcription), GO:0031047 (gene silenc…			0.555596	0.402757		-0.35964	-0.364909	-0.233804				399.925	67.7114	21.8143	-0.838595	5.34061	58.1767	3.98143e-05	0.00155144	8.0024e-10	8.56272e-10	0.2	0.354767	0.0560974	-0.866025	-0.983387	0.0576689	0.00256403		57.7887	51.7787	29.7034	29.5878	32.5928
ENSG00000198840	MT-ND3	PC	mitochondrially encoded NADH:ubiquinone oxidoreductase core subunit 3		hsa00190 (Oxidative phosphorylation), hsa01100 (Metabolic pathways), hsa04714 (Thermogenesis), hsa04723 (Retrograde endocannabinoid signaling), hsa05012 (Parkinson disease), R-HSA-1428517 (Homo sapiens: The citric acid (TCA) cycle and respiratory electron transport), R-HSA-1430728 (Homo sapiens: Metabolism), R-HSA-163200 (Homo sapiens: Respiratory electron transport, ATP synthesis by chemiosmotic…			0.734011	0.32229		-0.340443	-0.312943	-0.402914				399.669	99.7104	1.59284	-0.895201	11.1139	58.1194	3.99645e-05	0.00155144	4.47062e-11	4.44603e-11	0.2	0.354767	0.187997	-0.866025	-0.928831	0.0576689	0.0225464		3501.53	2631.7	1661.66	1693.67	1591.15
ENSG00000113328	CCNG1	PC	cyclin G1	The eukaryotic cell cycle is governed by cyclin-dependent protein kinases (CDKs) whose activities are regulated by cyclins and CDK inhibitors. The protein encoded by this gene is a member of the cyclin family and contains the cyclin box. The encoded protein lacks the protein destabilizing (PEST) sequence that is present in other family members. Transcriptional activation of this gene can be induc…	hsa04115 (p53 signaling pathway), hsa05206 (MicroRNAs in cancer), GO:0000079 (regulation of cyclin-dependent protein serine/threonine kinase activity), GO:0007067 (mitotic nuclear division), GO:0051301 (cell division), GO:0005654 (nucleoplasm), GO:0005515 (protein binding), R-HSA-212436 (Homo sapiens: Generic Transcription Pathway), R-HSA-3700989 (Homo sapiens: Transcriptional Regulation by TP53)…			0.600637	1.61609		-0.854631	-0.582958	-0.779139				399.547	63.0866	21.7973	-2.07011	5.04478	58.092	4.00365e-05	0.00155144	2.01127e-13	2.31964e-13	0.2	0.354767	0.273068	-0.866025	-0.859961	0.0576689	0.0615701		39.2963	81.4821	13.0602	16.1808	13.8693
ENSG00000177595	PIDD1	PC	p53-induced death domain protein 1	The protein encoded by this gene contains a leucine-rich repeat and a death domain. This protein has been shown to interact with other death domain proteins, such as Fas (TNFRSF6)-associated via death domain (FADD) and MAP-kinase activating death domain-containing protein (MADD), and thus may function as an adaptor protein in cell death-related signaling processes. The expression of the mouse cou…	hsa04064 (NF-kappa B signaling pathway), hsa04115 (p53 signaling pathway), hsa04210 (Apoptosis), GO:0006915 (apoptotic process), GO:0006919 (activation of cysteine-type endopeptidase activity involved in apoptotic process), GO:0006974 (cellular response to DNA damage stimulus), GO:0006977 (DNA damage response, signal transduction by p53 class mediator resulting in cell cycle arrest), GO:0007165 (…			-0.679284	-0.562217		0.275476	0.502083	0.463943				399.544	52.4913	81.3629	1.15175	4.42454	58.0914	4.00381e-05	0.00155144	6.83771e-10	8.52232e-10	0.2	0.354767	0.00385817	0.866025	0.978076	0.0576689	0.0038841		11.6733	12.8291	24.5024	29.0099	28.2009
ENSG00000196155	PLEKHG4	PC	pleckstrin homology and RhoGEF domain containing G4	The protein encoded by this gene contains multiple domains suggestive of a role in intracellular signaling and cytoskeleton dynamics at the Golgi apparatus. Mutations in this gene are associated with spinocerebellar ataxia 16q22-linked. Several alternatively spliced transcript variants, differing only in the 5_ UTR, or encoding a different isoform, have been found for this gene. [provided by RefS…	GO:0035023 (regulation of Rho protein signal transduction), GO:0090630 (NA), GO:0005089 (Rho guanyl-nucleotide exchange factor activity), GO:0005515 (protein binding)			-0.538619	-0.366478		0.338737	0.265139	0.30122				399.019	75.198	80.9199	0.781	5.83413	57.9739	4.03493e-05	0.00155697	8.56892e-10	9.67309e-10	0.2	0.354767	0.028672	0.866025	0.990527	0.0576689	0.00110528		37.2159	42.1858	70.0399	66.457	68.1907
ENSG00000183726	TMEM50A	PC	transmembrane protein 50A	This gene is located in the RH gene locus, between the RHD and RHCE genes. The function of its protein product is unknown; however, its sequence has potential transmembrane domains suggesting that it may be an integral membrane protein. Its position between the RH genes suggests that polymorphisms in this gene may be tightly linked to RH haplotypes and may contribute to selective pressure for or …	GO:0005783 (endoplasmic reticulum), GO:0016021 (integral component of membrane)			0.57926	0.322562		-0.341557	-0.309757	-0.250506				398.839	82.9231	32.9642	-0.773969	6.43883	57.9336	4.04567e-05	0.00155697	3.08825e-10	3.20234e-10	0.2	0.354767	0.131695	-0.866025	-0.961187	0.0576689	0.00912561		125.633	104.829	65.4168	66.9193	69.8088
ENSG00000213221	DNLZ	PC	DNL-type zinc finger		GO:0006457 (protein folding), GO:0030150 (protein import into mitochondrial matrix), GO:0050821 (protein stabilization), GO:0005654 (nucleoplasm), GO:0005739 (mitochondrion), GO:0008270 (zinc ion binding), GO:0051087 (chaperone binding)			-0.441632	-0.388517		0.272264	0.246111	0.311773				398.636	75.6835	67.7768	0.717567	5.86821	57.888	4.05784e-05	0.00155697	3.02611e-09	3.39029e-09	0.2	0.354767	0.000268575	0.866025	0.996247	0.0576689	0.000275849		41.1456	42.7636	68.7686	67.4972	70.7334
ENSG00000137500	CCDC90B	PC	coiled-coil domain containing 90B		GO:0005739 (mitochondrion), GO:0016021 (integral component of membrane), GO:0031966 (mitochondrial membrane), GO:0005515 (protein binding)			0.378895	0.556333		-0.249181	-0.368974	-0.317073				398.244	70.0111	41.0051	-0.815904	5.48387	57.8006	4.08135e-05	0.00156088	9.14716e-10	9.72548e-10	0.2	0.354767	0.0797203	-0.866025	-0.979835	0.0576689	0.00342689		56.2862	63.9143	35.7134	32.7084	33.9798
ENSG00000130024	PHF10	PC	PHD finger protein 10	This gene contains a predicted ORF that encodes a protein with two zinc finger domains. The function of the encoded protein is not known. Sequence analysis suggests that multiple alternatively spliced transcript variants are derived from this gene but the full-length nature of only two of them is known. These two splice variants encode different isoforms. A pseudogene for this gene is located on …	hsa05225 (Hepatocellular carcinoma), GO:0006351 (transcription, DNA-templated), GO:0006355 (regulation of transcription, DNA-templated), GO:0007399 (nervous system development), GO:0005634 (nucleus), GO:0071564 (npBAF complex), GO:0008270 (zinc ion binding)			0.712718	0.535525		-0.381648	-0.381648	-0.484948				398.128	42.2962	81.8313	-1.19012	3.85962	56.6447	4.4084e-05	0.00162764	1.60008e-09	1.85841e-09	0.138641	0.354767	0.0672229	-0.888523	-0.987165	0.043925	0.00174216		22.9999	20.1105	9.7085	9.7085	8.89946
ENSG00000099385	BCL7C	PC	BCL tumor suppressor 7C	This gene is identified by the similarity of its product to the N-terminal region of BCL7A protein. The BCL7A protein is encoded by the gene known to be directly involved in a three-way gene translocation in a Burkitt lymphoma cell line. The function of this gene has not yet been determined. Two transcript variants encoding different isoforms have been found for this gene. [provided by RefSeq, No…	GO:0006915 (apoptotic process)			-0.397846	-0.444226		0.334847	0.262087	0.245137				397.916	75.3854	53.7394	0.728637	5.84809	57.7272	4.1012e-05	0.00156338	2.71733e-09	3.04873e-09	0.2	0.354767	0.00056912	0.866025	0.993296	0.0576689	0.000658325		41.839	40.4521	70.849	67.2661	66.457
ENSG00000162614	NEXN	PC	nexilin F-actin binding protein	This gene encodes a filamentous actin-binding protein that may function in cell adhesion and migration. Mutations in this gene have been associated with dilated cardiomyopathy, also known as CMD1CC. Alternatively spliced transcript variants have been described.[provided by RefSeq, Feb 2010].	GO:0030334 (regulation of cell migration), GO:0048739 (cardiac muscle fiber development), GO:0051493 (regulation of cytoskeleton organization), GO:0005856 (cytoskeleton), GO:0005925 (focal adhesion), GO:0030018 (Z disc), GO:0008307 (structural constituent of muscle), GO:0051015 (actin filament binding)			0.624991	0.403884		-0.171072	-0.394901	-0.462903				396.976	85.9382	68.8671	-0.872301	6.72045	57.5173	4.15866e-05	0.00157433	5.73594e-11	5.83624e-11	0.2	0.354767	0.0659681	-0.866025	-0.962976	0.0576689	0.00850425		155.798	133.376	88.879	75.8188	72.2359
ENSG00000151092	NGLY1	PC	N-glycanase 1	This gene encodes an enzyme that catalyzes hydrolysis of an N(4)-(acetyl-beta-D-glucosaminyl) asparagine residue to N-acetyl-beta-D-glucosaminylamine and a peptide containing an aspartate residue. The encoded enzyme may play a role in the proteasome-mediated degradation of misfolded glycoproteins. Multiple transcript variants encoding different isoforms have been found for this gene.[provided by …	hsa04141 (Protein processing in endoplasmic reticulum), GO:0006457 (protein folding), GO:0006515 (misfolded or incompletely synthesized protein catabolic process), GO:0006516 (glycoprotein catabolic process), GO:0006517 (protein deglycosylation), GO:0005634 (nucleus), GO:0005737 (cytoplasm), GO:0005829 (cytosol), GO:0000224 (peptide-N4-(N-acetyl-beta-glucosaminyl)asparagine amidase activity), GO:…			0.646889	0.326911		-0.340941	-0.332211	-0.300648				396.968	80.0784	61.9676	-0.842341	6.20389	57.5155	4.15915e-05	0.00157433	1.98179e-10	2.04822e-10	0.2	0.354767	0.158168	-0.866025	-0.949705	0.0576689	0.0134374		111.301	88.7635	55.1304	55.4772	56.7485
ENSG00000118680	MYL12B	PC	myosin light chain 12B	The activity of nonmuscle myosin II (see MYH9; MIM 160775) is regulated by phosphorylation of a regulatory light chain, such as MRLC2. This phosphorylation results in higher MgATPase activity and the assembly of myosin II filaments (Iwasaki et al., 2001 [PubMed 11942626]).[supplied by OMIM, Mar 2008].	hsa04510 (Focal adhesion), hsa04530 (Tight junction), hsa04611 (Platelet activation), hsa04670 (Leukocyte transendothelial migration), hsa04810 (Regulation of actin cytoskeleton), GO:0006936 (muscle contraction), GO:0008360 (regulation of cell shape), GO:0001725 (stress fiber), GO:0005829 (cytosol), GO:0005903 (brush border), GO:0016460 (myosin II complex), GO:0030018 (Z disc), GO:0045177 (apical…			0.289015	0.38976		-0.22913	-0.237902	-0.211744				396.79	98.9524	32.845	-0.567545	10.0308	57.4758	4.17015e-05	0.00157433	3.8355e-09	3.81349e-09	0.2	0.354767	0.0656053	-0.866025	-0.990212	0.0576689	0.00116071		1254.02	1344.86	875.037	869.72	885.67
ENSG00000109472	CPE	PC	carboxypeptidase E	This gene encodes a carboxypeptidase that cleaves C-terminal amino acid residues and is involved in the biosynthesis of peptide hormones and neurotransmitters, including insulin. It is a peripheral membrane protein. The protein specifically binds regulated secretory pathway proteins, including prohormones, but not constitutively secreted proteins. Mutations in this gene are implicated in type II …	hsa04940 (Type I diabetes mellitus), GO:0003214 (cardiac left ventricle morphogenesis), GO:0006464 (cellular protein modification process), GO:0007218 (neuropeptide signaling pathway), GO:0008152 (metabolic process), GO:0016055 (Wnt signaling pathway), GO:0030070 (insulin processing), GO:0072657 (protein localization to membrane), GO:0005615 (extracellular space), GO:0005634 (nucleus), GO:0005794…			0.665398	0.800277		-0.360364	-0.766922	-0.338389				396.473	50.1235	19.4804	-1.34035	4.28096	57.405	4.1898e-05	0.00157668	3.94055e-11	4.49818e-11	0.2	0.354767	0.00669987	-0.866025	-0.982669	0.0576689	0.00273175		28.6632	31.6682	13.0602	9.36177	13.2914
ENSG00000147535	PLPP5	PC	phospholipid phosphatase 5		hsa00561 (Glycerolipid metabolism), hsa00564 (Glycerophospholipid metabolism), GO:0006644 (phospholipid metabolic process), GO:0007165 (signal transduction), GO:0046839 (phospholipid dephosphorylation), GO:0005737 (cytoplasm), GO:0005886 (plasma membrane), GO:0005887 (integral component of plasma membrane), GO:0008195 (phosphatidate phosphatase activity), R-HSA-168249 (Homo sapiens: Innate Immune…			0.577531	0.957177		-0.530882	-0.501913	-0.501913				396.413	24.8446	18.3816	-1.6807	2.87789	56.2695	4.52144e-05	0.0016515	4.8692e-10	6.30907e-10	0.138641	0.354767	0.138454	-0.888523	-0.961515	0.043925	0.00901065		10.2864	13.9849	3.69848	3.81405	3.81405
ENSG00000122786	CALD1	PC	caldesmon 1	This gene encodes a calmodulin- and actin-binding protein that plays an essential role in the regulation of smooth muscle and nonmuscle contraction. The conserved domain of this protein possesses the binding activities to Ca(2+)-calmodulin, actin, tropomyosin, myosin, and phospholipids. This protein is a potent inhibitor of the actin-tropomyosin activated myosin MgATPase, and serves as a mediatin…	hsa04270 (Vascular smooth muscle contraction), GO:0006928 (cellular component movement), GO:0006936 (muscle contraction), GO:0005829 (cytosol), GO:0005856 (cytoskeleton), GO:0005886 (plasma membrane), GO:0015629 (actin cytoskeleton), GO:0030016 (myofibril), GO:0030478 (actin cap), GO:0043231 (intracellular membrane-bounded organelle), GO:0003779 (actin binding), GO:0005515 (protein binding), GO:0…			0.336006	0.346727		-0.186944	-0.237141	-0.258648				395.486	94.6768	59.9319	-0.57291	8.02789	57.185	4.25166e-05	0.00159485	4.05152e-09	4.1087e-09	0.2	0.354767	0.000278746	-0.866025	-0.997557	0.0576689	0.000144907		323.386	325.813	224.451	216.708	213.471
ENSG00000225921	NOL7	PC	nucleolar protein 7		GO:0005634 (nucleus), GO:0005730 (nucleolus), GO:0005739 (mitochondrion), GO:0003723 (RNA binding)			0.648999	0.308157		-0.37506	-0.308656	-0.27344				395.206	94.1317	19.0886	-0.813892	7.86878	57.1227	4.26939e-05	0.0015964	9.73608e-11	9.78422e-11	0.2	0.354767	0.167454	-0.866025	-0.941024	0.0576689	0.01704		352.28	277.733	172.21	180.416	184.924
ENSG00000173465	SSSCA1	PC	Sjogren syndrome/scleroderma autoantigen 1	This antigen is recognized by a subset of anti-centromere antibodies from patients with scleroderma and/or Sjogren_s syndrome. Subcellular localization has not yet been established. [provided by RefSeq, Jul 2008].	GO:0007067 (mitotic nuclear division), GO:0051301 (cell division), GO:0005515 (protein binding), GO:0042802 (identical protein binding)			-0.614894	-0.391887		0.377964	0.304667	0.32415				394.333	68.0606	12.632	0.88051	5.36428	56.9286	4.32516e-05	0.00161212	6.57842e-10	7.62911e-10	0.2	0.354767	0.0397652	0.866025	0.989092	0.0576689	0.00136541		24.9647	29.4722	51.6631	49.0048	49.6983
ENSG00000083937	CHMP2B	PC	charged multivesicular body protein 2B	This gene encodes a component of the heteromeric ESCRT-III complex (Endosomal Sorting Complex Required for Transport III) that functions in the recycling or degradation of cell surface receptors. ESCRT-III functions in the concentration and invagination of ubiquitinated endosomal cargos into intralumenal vesicles. The protein encoded by this gene is found as a monomer in the cytosol or as an olig…	hsa04144 (Endocytosis), hsa04217 (Necroptosis), GO:0000920 (cytokinetic cell separation), GO:0006914 (autophagy), GO:0006997 (nucleus organization), GO:0007032 (endosome organization), GO:0007080 (mitotic metaphase plate congression), GO:0010824 (regulation of centrosome duplication), GO:0015031 (protein transport), GO:0016197 (endosomal transport), GO:0016236 (macroautophagy), GO:0019058 (viral …			0.470988	0.949469		-0.501829	-0.501829	-0.4168				394.318	49.4762	56.4566	-1.3361	4.24096	55.8124	4.66403e-05	0.00167463	3.08988e-10	3.49066e-10	0.138641	0.354767	0.179153	-0.888523	-0.93583	0.043925	0.0193246		24.1557	34.4421	11.3266	11.3266	12.1356
ENSG00000116754	SRSF11	PC	serine and arginine rich splicing factor 11	This gene encodes 54-kD nuclear protein that contains an arginine/serine-rich region similar to segments found in pre-mRNA splicing factors. Although the function of this protein is not yet known, structure and immunolocalization data suggest that it may play a role in pre-mRNA processing. Alternative splicing results in multiple transcript variants encoding different proteins. In addition, a pse…	GO:0000398 (mRNA splicing, via spliceosome), GO:0006369 (termination of RNA polymerase II transcription), GO:0006397 (mRNA processing), GO:0006405 (RNA export from nucleus), GO:0006406 (mRNA export from nucleus), GO:0008380 (RNA splicing), GO:0031124 (mRNA 3'-end processing), GO:0005634 (nucleus), GO:0005654 (nucleoplasm), GO:0016607 (nuclear speck), GO:0003723 (RNA binding), GO:0005515 (protein …			0.455791	0.351968		-0.151582	-0.331538	-0.324639				393.92	93.527	57.2743	-0.677729	7.75899	56.8368	4.35186e-05	0.00161694	6.67287e-10	6.76151e-10	0.2	0.354767	0.0130053	-0.866025	-0.980497	0.0576689	0.00325986		289.29	269.064	189.2	166.778	167.587
ENSG00000110330	BIRC2	PC	baculoviral IAP repeat containing 2	The protein encoded by this gene is a member of a family of proteins that inhibits apoptosis by binding to tumor necrosis factor receptor-associated factors TRAF1 and TRAF2, probably by interfering with activation of ICE-like proteases. This encoded protein inhibits apoptosis induced by serum deprivation and menadione, a potent inducer of free radicals. Alternatively spliced transcript variants e…	hsa01524 (Platinum drug resistance), hsa04064 (NF-kappa B signaling pathway), hsa04120 (Ubiquitin mediated proteolysis), hsa04210 (Apoptosis), hsa04215 (Apoptosis - multiple species), hsa04217 (Necroptosis), hsa04390 (Hippo signaling pathway), hsa04510 (Focal adhesion), hsa04621 (NOD-like receptor signaling pathway), hsa04668 (TNF signaling pathway), hsa05145 (Toxoplasmosis), hsa05200 (Pathways i…			0.406363	0.47045		-0.308267	-0.281629	-0.286918				393.524	66.238	66.0392	-0.769245	5.24272	56.7488	4.37764e-05	0.00162138	4.44089e-09	4.76799e-09	0.2	0.354767	0.0317121	-0.866025	-0.997229	0.0576689	0.000175059		48.8892	51.2008	29.0099	29.5878	29.4722
ENSG00000123124	WWP1	PC	WW domain containing E3 ubiquitin protein ligase 1	WW domain-containing proteins are found in all eukaryotes and play an important role in the regulation of a wide variety of cellular functions such as protein degradation, transcription, and RNA splicing. This gene encodes a protein which contains 4 tandem WW domains and a HECT (homologous to the E6-associated protein carboxyl terminus) domain. The encoded protein belongs to a family of NEDD4-lik…	hsa04120 (Ubiquitin mediated proteolysis), hsa04144 (Endocytosis), GO:0007165 (signal transduction), GO:0007417 (central nervous system development), GO:0016567 (protein ubiquitination), GO:0034220 (ion transmembrane transport), GO:0043161 (proteasome-mediated ubiquitin-dependent protein catabolic process), GO:0045892 (negative regulation of transcription, DNA-templated), GO:0046718 (viral entry …			0.467821	0.660952		-0.34245	-0.443873	-0.34245				393.347	51.8695	47.6746	-1.03397	4.39314	55.6009	4.73187e-05	0.00168866	2.49225e-09	2.78057e-09	0.138641	0.354767	0.0797874	-0.888523	-0.98272	0.043925	0.00271966		27.8542	32.1305	15.0251	13.8693	15.0251
ENSG00000119314	PTBP3	PC	polypyrimidine tract binding protein 3	The protein encoded by this gene binds RNA and is a regulator of cell differentiation. The encoded protein preferentially binds to poly(G) and poly(U) sequences in vitro. Several transcript variants encoding different isoforms have been found for this gene. [provided by RefSeq, Oct 2011].	GO:0006397 (mRNA processing), GO:0008380 (RNA splicing), GO:0009653 (anatomical structure morphogenesis), GO:0033119 (negative regulation of RNA splicing), GO:0043249 (erythrocyte maturation), GO:0045595 (regulation of cell differentiation), GO:0005634 (nucleus), GO:0003723 (RNA binding)			0.891828	0.686444		-0.829042	-0.406594	-0.342636				392.381	46.9125	95.4429	-1.46626	4.09248	56.4952	4.45302e-05	0.00163511	3.31553e-11	3.84538e-11	0.2	0.354767	0.0294067	-0.866025	-0.977291	0.0576689	0.00409398		29.3567	25.1959	7.51253	10.7487	11.3266
ENSG00000120913	PDLIM2	PC	PDZ and LIM domain 2	This gene encodes a member of the ALP subfamily of PDZ-LIM domain proteins. The encoded protein suppresses anchorage-dependent growth and promotes cell migration and adhesion through interactions with the actin cytoskeleton via the PDZ domain. The encoded protein is also a putative tumor suppressor protein, and decreased expression of this gene is associated with several malignancies including br…	GO:0005634 (nucleus), GO:0005737 (cytoplasm), GO:0005856 (cytoskeleton), GO:0070062 (extracellular vesicular exosome), GO:0005515 (protein binding), GO:0008270 (zinc ion binding)			-0.693162	-0.502474		0.363832	0.346436	0.485368				392.329	53.0193	56.5758	1.10111	4.4583	56.4837	4.45649e-05	0.00163511	1.18397e-09	1.46423e-09	0.2	0.354767	0.00335233	0.866025	0.987069	0.0576689	0.00176179		11.9045	13.8693	26.9295	26.5828	29.4722
ENSG00000147140	NONO	PC	non-POU domain containing octamer binding	This gene encodes an RNA-binding protein which plays various roles in the nucleus, including transcriptional regulation and RNA splicing. A rearrangement between this gene and the transcription factor E3 gene has been observed in papillary renal cell carcinoma. Alternatively spliced transcript variants have been described. Pseudogenes exist on Chromosomes 2 and 16. [provided by RefSeq, Feb 2009].	GO:0000398 (mRNA splicing, via spliceosome), GO:0006281 (DNA repair), GO:0006310 (DNA recombination), GO:0006351 (transcription, DNA-templated), GO:0006355 (regulation of transcription, DNA-templated), GO:0006397 (mRNA processing), GO:0007623 (circadian rhythm), GO:0008380 (RNA splicing), GO:0042752 (regulation of circadian rhythm), GO:0045892 (negative regulation of transcription, DNA-templated)…			0.430245	0.28727		-0.251542	-0.198935	-0.267038				391.246	97.8707	46.908	-0.601536	9.10604	56.2439	4.52928e-05	0.0016515	2.51858e-09	2.51696e-09	0.2	0.354767	0.0825949	-0.866025	-0.980941	0.0576689	0.00314949		726.866	658.098	452.37	469.244	447.516
ENSG00000064932	SBNO2	PC	strawberry notch homolog 2		GO:0001503 (ossification), GO:0002281 (macrophage activation involved in immune response), GO:0006351 (transcription, DNA-templated), GO:0030154 (cell differentiation), GO:0045892 (negative regulation of transcription, DNA-templated), GO:0050727 (regulation of inflammatory response), GO:0071222 (cellular response to lipopolysaccharide), GO:0071348 (cellular response to interleukin-11), GO:0071354…			-0.490778	-0.512226		0.277621	0.290065	0.435318				390.591	62.6267	76.1925	0.895537	5.02546	56.0989	4.57403e-05	0.00166265	2.84215e-09	3.3395e-09	0.2	0.354767	0.00595397	0.866025	0.983927	0.0576689	0.00244027		21.4974	21.1507	38.025	38.3717	42.6481
ENSG00000120438	TCP1	PC	t-complex 1	The protein encoded by this gene is a molecular chaperone that is a member of the chaperonin containing TCP1 complex (CCT), also known as the TCP1 ring complex (TRiC). This complex consists of two identical stacked rings, each containing eight different proteins. Unfolded polypeptides enter the central cavity of the complex and are folded in an ATP-dependent manner. The complex folds various prot…	GO:0006457 (protein folding), GO:0006458 ('de novo' protein folding), GO:0007021 (tubulin complex assembly), GO:0007339 (binding of sperm to zona pellucida), GO:0032212 (positive regulation of telomere maintenance via telomerase), GO:0044053 (translocation of peptides or proteins into host cell cytoplasm), GO:0050821 (protein stabilization), GO:0051973 (positive regulation of telomerase activity)…			0.755591	0.318518		-0.322197	-0.368332	-0.38358				390.015	91.074	21.5417	-0.922495	7.34841	55.9717	4.61371e-05	0.0016719	4.56402e-11	4.58569e-11	0.2	0.354767	0.197109	-0.866025	-0.923394	0.0576689	0.0251578		261.552	192.668	122.859	118.929	117.658
ENSG00000100554	ATP6V1D	PC	ATPase H+ transporting V1 subunit D	This gene encodes a component of vacuolar ATPase (V-ATPase), a multisubunit enzyme that mediates acidification of eukaryotic intracellular organelles. V-ATPase dependent organelle acidification is necessary for such intracellular processes as protein sorting, zymogen activation, receptor-mediated endocytosis, and synaptic vesicle proton gradient generation. V-ATPase is composed of a cytosolic V1 …	hsa00190 (Oxidative phosphorylation), hsa01100 (Metabolic pathways), hsa04145 (Phagosome), hsa04150 (mTOR signaling pathway), hsa04721 (Synaptic vesicle cycle), hsa04966 (Collecting duct acid secretion), hsa05110 (Vibrio cholerae infection), hsa05120 (Epithelial cell signaling in Helicobacter pylori infection), hsa05165 (Human papillomavirus infection), hsa05323 (Rheumatoid arthritis), GO:0008286…			0.650276	0.315214		-0.295352	-0.280493	-0.389645				389.585	88.1611	16.2095	-0.826186	6.9868	55.8766	4.64367e-05	0.00167463	1.69331e-10	1.72039e-10	0.2	0.354767	0.162781	-0.866025	-0.942937	0.0576689	0.0162221		191.512	151.406	98.472	99.5122	92.1152
ENSG00000107371	EXOSC3	PC	exosome component 3	This gene encodes a non-catalytic component of the human exosome, a complex with 3_-5_ exoribonuclease activity that plays a role in numerous RNA processing and degradation activities. Related pseudogenes of this gene are found on chromosome 19 and 21. Alternatively spliced transcript variants encoding different isoforms have been described. [provided by RefSeq, Jun 2012].	hsa03018 (RNA degradation), GO:0000467 (exonucleolytic trimming to generate mature 3'-end of 5.8S rRNA from tricistronic rRNA transcript (SSU-rRNA, 5.8S rRNA, LSU-rRNA)), GO:0006364 (rRNA processing), GO:0034427 (nuclear-transcribed mRNA catabolic process, exonucleolytic, 3'-5'), GO:0034475 (U4 snRNA 3'-end processing), GO:0043488 (regulation of mRNA stability), GO:0043928 (exonucleolytic nuclear…			0.391826	0.463163		-0.402023	-0.264333	-0.188633				389.363	80.402	15	-0.728857	6.23477	55.8278	4.65914e-05	0.00167463	1.00688e-09	1.05835e-09	0.2	0.354767	0.00243346	-0.866025	-0.985621	0.0576689	0.00206531		96.0448	101.015	54.5525	60.2158	63.5676
ENSG00000275197	AC092794.2	antisense						0.65303	1.28584		-0.500829	-0.619614	-0.818424				388.501	4.2671	5.53663	-3.23751	1.65247	55.6376	4.72e-05	0.00168866	1.01233e-12	2.02911e-12	0.2	0.354767	0.192992	-0.866025	-0.923578	0.0576689	0.0250679		4.50752	8.09042	0.924619	0.693465	0.346732
ENSG00000281021	AL078581.3	antisense						1.33531	0.592475		-0.717735	-0.717735	-0.492315				388.038	29.8271	11.2436	-2.09016	3.16119	54.4503	5.12298e-05	0.00175874	7.1714e-11	9.22373e-11	0.138641	0.354767	0.224104	-0.888523	-0.90132	0.043925	0.0366559		20.6884	11.5577	3.46732	3.46732	4.39194
ENSG00000261604	AC114947.2	antisense						0.37819	0.574642		-0.304159	-0.355729	-0.292945				387.732	65.267	47.5213	-0.840871	5.17971	55.4681	4.77509e-05	0.00169892	2.57846e-09	2.76927e-09	0.2	0.354767	0.0975474	-0.866025	-0.978525	0.0576689	0.00376543		45.5375	52.4721	27.623	26.5828	27.8542
ENSG00000168958	MFF	PC	mitochondrial fission factor	This is a nuclear gene encoding a protein that functions in mitochondrial and peroxisomal fission. The encoded protein recruits dynamin-1-like protein (DNM1L) to mitochondria. There are multiple pseudogenes for this gene on chromosomes 1, 5, and X. Alternative splicing results in multiple transcript variants. [provided by RefSeq, Mar 2013].	GO:0000266 (mitochondrial fission), GO:0001836 (release of cytochrome c from mitochondria), GO:0006626 (protein targeting to mitochondrion), GO:0008053 (mitochondrial fusion), GO:0010821 (regulation of mitochondrion organization), GO:0016559 (peroxisome fission), GO:0043653 (mitochondrial fragmentation involved in apoptotic process), GO:0051260 (protein homooligomerization), GO:0070584 (mitochond…			0.599831	0.323403		-0.372068	-0.302502	-0.248664				386.657	81.5518	32.2147	-0.794273	6.32156	55.2317	4.85324e-05	0.00171799	5.28654e-10	5.47676e-10	0.2	0.354767	0.137016	-0.866025	-0.956062	0.0576689	0.0109827		117.311	96.5071	58.8289	61.8339	64.261
ENSG00000188186	LAMTOR4	PC	late endosomal/lysosomal adaptor, MAPK and MTOR activator 4		hsa04150 (mTOR signaling pathway), GO:0007050 (cell cycle arrest), GO:0008361 (regulation of cell size), GO:0016236 (macroautophagy), GO:0032008 (positive regulation of TOR signaling), GO:0043547 (positive regulation of GTPase activity), GO:0061462 (protein localization to lysosome), GO:0071230 (cellular response to amino acid stimulus), GO:0005764 (lysosome), GO:0005765 (lysosomal membrane), GO:…			-0.513538	-0.329352		0.192453	0.335437	0.315001				386.593	90.827	5.37479	0.710396	7.31341	55.2176	4.85795e-05	0.00171799	9.6251e-10	9.27709e-10	0.2	0.354767	0.0127123	0.866025	0.9765	0.0576689	0.00430931		107.487	122.396	176.602	195.21	192.436
ENSG00000162694	EXTL2	PC	exostosin like glycosyltransferase 2		hsa00534 (Glycosaminoglycan biosynthesis - heparan sulfate / heparin), hsa01100 (Metabolic pathways), GO:0006024 (glycosaminoglycan biosynthetic process), GO:0006044 (N-acetylglucosamine metabolic process), GO:0015012 (heparan sulfate proteoglycan biosynthetic process), GO:0019276 (UDP-N-acetylgalactosamine metabolic process), GO:0005783 (endoplasmic reticulum), GO:0005789 (endoplasmic reticulum …			0.760102	1.09421		-0.494085	-0.419194	-0.941037				385.937	29.6227	67.3424	-1.93838	3.14997	55.0733	4.90648e-05	0.00172553	1.79541e-11	2.33624e-11	0.2	0.354767	0.0859798	-0.866025	-0.967998	0.0576689	0.00683906		13.5226	17.5678	4.50752	4.85425	2.77386
ENSG00000118985	ELL2	PC	elongation factor for RNA polymerase II 2		GO:0006355 (regulation of transcription, DNA-templated), GO:0006368 (transcription elongation from RNA polymerase II promoter), GO:0042795 (snRNA transcription from RNA polymerase II promoter), GO:0005654 (nucleoplasm), GO:0008023 (transcription elongation factor complex), GO:0005515 (protein binding), R-HSA-6807505 (Homo sapiens: RNA polymerase II transcribes snRNA genes), R-HSA-74160 (Homo sapi…			0.461568	0.834202		-0.445226	-0.348871	-0.501674				385.625	51.0859	38.9608	-1.20093	4.34472	55.0049	4.92969e-05	0.00172553	7.0829e-10	7.92817e-10	0.2	0.354767	0.147318	-0.866025	-0.952802	0.0576689	0.0122213		26.2361	34.5576	13.0602	14.1004	12.4824
ENSG00000135334	AKIRIN2	PC	akirin 2		GO:0000122 (negative regulation of transcription from RNA polymerase II promoter), GO:0006351 (transcription, DNA-templated), GO:0008284 (positive regulation of cell proliferation), GO:0009790 (embryo development), GO:0010950 (positive regulation of endopeptidase activity), GO:0032496 (response to lipopolysaccharide), GO:0032755 (positive regulation of interleukin-6 production), GO:0045087 (innat…			0.364341	0.432515		-0.26176	-0.291794	-0.243302				385.465	73.7331	26.2181	-0.688812	5.74055	54.9697	4.94169e-05	0.00172553	7.46916e-09	8.06932e-09	0.2	0.354767	0.0298397	-0.866025	-0.995912	0.0576689	0.000313625		67.2661	70.6178	42.8792	41.9546	43.4571
ENSG00000171425	ZNF581	PC	zinc finger protein 581		GO:0006351 (transcription, DNA-templated), GO:0006355 (regulation of transcription, DNA-templated), GO:0005634 (nucleus), GO:0003677 (DNA binding), GO:0005515 (protein binding), GO:0046872 (metal ion binding)			-0.48775	-0.429203		0.300593	0.323475	0.292885				385.316	64.1172	28.833	0.812842	5.11286	54.937	4.95288e-05	0.00172553	7.87513e-09	9.14128e-09	0.2	0.354767	0.00348829	0.866025	0.998696	0.0576689	5.65069e-05		23.1155	24.1557	41.3767	42.0702	41.1456
ENSG00000251022	THAP9-AS1	antisense	THAP9 antisense RNA 1					0.559989	0.458273		-0.251833	-0.470838	-0.295591				385.315	62.1753	21.4225	-0.899379	4.9965	54.9368	4.95295e-05	0.00172553	1.56469e-09	1.69582e-09	0.2	0.354767	0.00902174	-0.866025	-0.986906	0.0576689	0.00179511		45.5375	42.3013	25.0803	21.2662	24.2713
ENSG00000178988	MRFAP1L1	PC	Morf4 family associated protein 1 like 1		GO:0005515 (protein binding), GO:0042802 (identical protein binding)			0.33713	0.422333		-0.244134	-0.299245	-0.216085				385.122	80.7682	69.0034	-0.64932	6.26284	54.8945	4.96745e-05	0.00172553	5.89063e-09	6.24415e-09	0.2	0.354767	0.0309438	-0.866025	-0.992002	0.0576689	0.00085766		94.8891	100.784	62.7585	60.3314	64.0299
ENSG00000176248	ANAPC2	PC	anaphase promoting complex subunit 2	A large protein complex, termed the anaphase-promoting complex (APC), or the cyclosome, promotes metaphase-anaphase transition by ubiquitinating its specific substrates such as mitotic cyclins and anaphase inhibitor, which are subsequently degraded by the 26S proteasome. Biochemical studies have shown that the vertebrate APC contains eight subunits. The composition of the APC is highly conserved …	hsa04110 (Cell cycle), hsa04114 (Oocyte meiosis), hsa04120 (Ubiquitin mediated proteolysis), hsa04914 (Progesterone-mediated oocyte maturation), hsa05166 (Human T-cell leukemia virus 1 infection), GO:0007067 (mitotic nuclear division), GO:0031145 (anaphase-promoting complex-dependent proteasomal ubiquitin-dependent protein catabolic process), GO:0031915 (positive regulation of synaptic plasticity…			-0.590957	-0.352531		0.26572	0.408562	0.269207				384.809	81.6711	34.5826	0.804329	6.33195	54.8258	4.99113e-05	0.00172594	5.25918e-10	4.66776e-10	0.2	0.354767	0.0198484	0.866025	0.974466	0.0576689	0.00487909		50.7385	60.2158	93.5021	103.442	93.7333
ENSG00000104549	SQLE	PC	squalene epoxidase	Squalene epoxidase catalyzes the first oxygenation step in sterol biosynthesis and is thought to be one of the rate-limiting enzymes in this pathway. [provided by RefSeq, Jul 2008]. Publication Note: This RefSeq record includes a subset of the publications that are available for this gene. Please see the Gene record to access additional publications.	hsa00100 (Steroid biosynthesis), hsa01100 (Metabolic pathways), GO:0006695 (cholesterol biosynthetic process), GO:0006725 (cellular aromatic compound metabolic process), GO:0008203 (cholesterol metabolic process), GO:0010033 (response to organic substance), GO:0016126 (sterol biosynthetic process), GO:0055114 (oxidation-reduction process), GO:0005783 (endoplasmic reticulum), GO:0005789 (endoplasm…			0.398069	0.926386		-0.440044	-0.55298	-0.33143				384.718	75.198	40.6218	-1.16522	5.83413	54.8058	4.99803e-05	0.00172594	2.88501e-11	2.85855e-11	0.2	0.354767	0.20169	-0.866025	-0.915383	0.0576689	0.0291696		69.3465	100.899	37.9094	34.9044	41.03
ENSG00000163636	PSMD6	PC	proteasome 26S subunit, non-ATPase 6	This gene encodes a member of the protease subunit S10 family. The encoded protein is a subunit of the 26S proteasome which colocalizes with DNA damage foci and is involved in the ATP-dependent degradation of ubiquinated proteins. Alternative splicing results in multiple transcript variants [provided by RefSeq, Nov 2012].	hsa03050 (Proteasome), hsa05169 (Epstein-Barr virus infection), GO:0000165 (MAPK cascade), GO:0000209 (protein polyubiquitination), GO:0002223 (stimulatory C-type lectin receptor signaling pathway), GO:0002479 (antigen processing and presentation of exogenous peptide antigen via MHC class I, TAP-dependent), GO:0006508 (proteolysis), GO:0006521 (regulation of cellular amino acid metabolic process)…			0.359753	0.30942		-0.216179	-0.246919	-0.206076				384.083	93.4418	54.9319	-0.562908	7.72991	54.6667	5.04646e-05	0.00173755	9.36355e-09	9.5447e-09	0.2	0.354767	0.0204026	-0.866025	-0.996742	0.0576689	0.000223121		267.677	258.431	178.914	175.1	180.185
ENSG00000149231	CCDC82	PC	coiled-coil domain containing 82					0.388043	0.89829		-0.42609	-0.374107	-0.486135				381.658	67.1578	48.7138	-1.15035	5.29971	54.1367	5.23645e-05	0.00179245	1.13414e-10	1.21146e-10	0.2	0.354767	0.201442	-0.866025	-0.919516	0.0576689	0.027076		47.8491	68.9997	26.3517	27.3918	25.1959
ENSG00000012660	ELOVL5	PC	ELOVL fatty acid elongase 5	This gene belongs to the ELO family. It is highly expressed in the adrenal gland and testis, and encodes a multi-pass membrane protein that is localized in the endoplasmic reticulum. This protein is involved in the elongation of long-chain polyunsaturated fatty acids. Mutations in this gene have been associated with spinocerebellar ataxia-38 (SCA38). Alternatively spliced transcript variants have…	hsa00062 (Fatty acid elongation), hsa01040 (Biosynthesis of unsaturated fatty acids), hsa01100 (Metabolic pathways), hsa01212 (Fatty acid metabolism), GO:0006636 (unsaturated fatty acid biosynthetic process), GO:0019367 (fatty acid elongation, saturated fatty acid), GO:0034625 (fatty acid elongation, monounsaturated fatty acid), GO:0034626 (fatty acid elongation, polyunsaturated fatty acid), GO:0…			0.329003	0.619128		-0.390258	-0.281998	-0.275876				381.346	78.2046	61.3373	-0.820012	6.06634	54.0686	5.26147e-05	0.00179578	7.34702e-10	7.639e-10	0.2	0.354767	0.141309	-0.866025	-0.953919	0.0576689	0.0117922		81.0198	99.5122	48.4269	52.3566	52.5877
ENSG00000168876	ANKRD49	PC	ankyrin repeat domain 49		GO:0007283 (spermatogenesis), GO:0030154 (cell differentiation), GO:0045893 (positive regulation of transcription, DNA-templated), GO:0005634 (nucleus), GO:0005515 (protein binding)			0.919538	0.648199		-0.692837	-0.619125	-0.255774				380.905	41.6915	38.9608	-1.49755	3.81767	53.9724	5.2971e-05	0.00179851	1.48365e-10	1.74535e-10	0.2	0.354767	0.0628867	-0.866025	-0.969637	0.0576689	0.00632211		24.9647	20.3416	6.81907	7.28138	9.93966
ENSG00000129911	KLF16	PC	Kruppel like factor 16		GO:0000122 (negative regulation of transcription from RNA polymerase II promoter), GO:0006351 (transcription, DNA-templated), GO:0007212 (dopamine receptor signaling pathway), GO:0005634 (nucleus), GO:0000978 (RNA polymerase II core promoter proximal region sequence-specific DNA binding), GO:0001078 (RNA polymerase II core promoter proximal region sequence-specific DNA binding transcription facto…			-0.637186	-0.557185		0.292737	0.330031	0.571602				380.837	56.1366	49.2334	1.09448	4.63914	53.9576	5.30259e-05	0.00179851	1.8219e-09	2.217e-09	0.2	0.354767	0.0120873	0.866025	0.962879	0.0576689	0.00853762		14.216	15.1406	28.8944	29.7034	35.4823
ENSG00000165732	DDX21	PC	DExD-box helicase 21	DEAD box proteins, characterized by the conserved motif Asp-Glu-Ala-Asp (DEAD), are putative RNA helicases. They are implicated in a number of cellular processes involving alteration of RNA secondary structure such as translation initiation, nuclear and mitochondrial splicing, and ribosome and spliceosome assembly. Based on their distribution patterns, some members of this family are believed to …	GO:0001649 (osteoblast differentiation), GO:0006364 (rRNA processing), GO:0006366 (transcription from RNA polymerase II promoter), GO:0009615 (response to virus), GO:0010501 (RNA secondary structure unwinding), GO:0043330 (response to exogenous dsRNA), GO:0045815 (positive regulation of gene expression, epigenetic), GO:0005634 (nucleus), GO:0005654 (nucleoplasm), GO:0005730 (nucleolus), GO:001602…			0.391381	0.988046		-0.556158	-0.453992	-0.369278				380.617	77.421	97.9302	-1.21583	6.00483	53.9096	5.32051e-05	0.00179851	2.11355e-11	2.08445e-11	0.2	0.354767	0.221053	-0.866025	-0.902835	0.0576689	0.0358233		76.9746	117.427	38.9496	41.9546	44.6129
ENSG00000106009	BRAT1	PC	BRCA1 associated ATM activator 1	The protein encoded by this ubiquitously expressed gene interacts with the tumor suppressing BRCA1 (breast cancer 1) protein and and the ATM (ataxia telangiectasia mutated) protein. ATM is thought to be a master controller of cell cycle checkpoint signalling pathways that are required for cellular responses to DNA damage such as double-strand breaks that are induced by ionizing radiation and comp…	GO:0001934 (positive regulation of protein phosphorylation), GO:0006006 (glucose metabolic process), GO:0006915 (apoptotic process), GO:0006974 (cellular response to DNA damage stimulus), GO:0008283 (cell proliferation), GO:0010212 (response to ionizing radiation), GO:0016049 (cell growth), GO:0016477 (cell migration), GO:0051646 (mitochondrion localization), GO:0005634 (nucleus), GO:0005654 (nuc…			-0.487235	-0.348444		0.297536	0.30198	0.236165				380.492	76.433	92.0187	0.719886	5.92804	53.8823	5.33073e-05	0.00179851	5.04515e-09	5.63106e-09	0.2	0.354767	0.0191215	0.866025	0.991434	0.0576689	0.000950488		41.4923	45.8842	72.9294	73.1605	69.8088
ENSG00000134001	EIF2S1	PC	eukaryotic translation initiation factor 2 subunit alpha	The translation initiation factor EIF2 catalyzes the first regulated step of protein synthesis initiation, promoting the binding of the initiator tRNA to 40S ribosomal subunits. Binding occurs as a ternary complex of methionyl-tRNA, EIF2, and GTP. EIF2 is composed of 3 nonidentical subunits, the 36-kD EIF2-alpha subunit (EIF2S1), the 38-kD EIF2-beta subunit (EIF2S2; MIM 603908), and the 52-kD EIF…	hsa03013 (RNA transport), hsa04140 (Autophagy - animal), hsa04141 (Protein processing in endoplasmic reticulum), hsa04210 (Apoptosis), hsa04932 (Non-alcoholic fatty liver disease (NAFLD)), hsa05160 (Hepatitis C), hsa05162 (Measles), hsa05164 (Influenza A), hsa05168 (Herpes simplex infection), GO:0006413 (translational initiation), GO:0007568 (aging), GO:0032057 (negative regulation of translation…			0.444418	0.371868		-0.219131	-0.302661	-0.294494				380.113	72.4385	59.6934	-0.707128	5.63981	53.7999	5.36172e-05	0.00180378	8.1862e-09	8.84997e-09	0.2	0.354767	0.0171372	-0.866025	-0.993948	0.0576689	0.000564671		66.3414	62.9897	41.1456	38.7184	38.9496
ENSG00000122545	SEPT7	PC	septin 7	This gene encodes a protein that is highly similar to the CDC10 protein of Saccharomyces cerevisiae. The protein also shares similarity with Diff 6 of Drosophila and with H5 of mouse. Each of these similar proteins, including the yeast CDC10, contains a GTP-binding motif. The yeast CDC10 protein is a structural component of the 10 nm filament which lies inside the cytoplasmic membrane and is esse…	GO:0000910 (cytokinesis), GO:0007067 (mitotic nuclear division), GO:0007283 (spermatogenesis), GO:0016476 (regulation of embryonic cell shape), GO:0030154 (cell differentiation), GO:0051291 (protein heterooligomerization), GO:0060271 (cilium morphogenesis), GO:1902857 (positive regulation of nonmotile primary cilium assembly), GO:0000777 (condensed chromosome kinetochore), GO:0001725 (stress fibe…			0.417262	0.475902		-0.129439	-0.324422	-0.439302				379.837	94.4553	58.7564	-0.744741	7.9588	53.7397	5.3845e-05	0.00180627	5.07674e-10	5.10818e-10	0.2	0.354767	0.00326468	-0.866025	-0.976249	0.0576689	0.00437815		321.19	334.597	219.25	191.281	176.487
ENSG00000156171	DRAM2	PC	DNA damage regulated autophagy modulator 2		GO:0006914 (autophagy), GO:0006915 (apoptotic process), GO:0007601 (visual perception), GO:0010506 (regulation of autophagy), GO:0045494 (photoreceptor cell maintenance), GO:0001917 (photoreceptor inner segment), GO:0005737 (cytoplasm), GO:0005764 (lysosome), GO:0005765 (lysosomal membrane), GO:0005794 (Golgi apparatus), GO:0016021 (integral component of membrane), GO:0016324 (apical plasma membr…			0.525833	1.01963		-0.492776	-0.537651	-0.515039				378.947	33.1403	23.6286	-1.5926	3.32987	53.5462	5.45857e-05	0.0018259	9.21244e-10	1.12042e-09	0.2	0.354767	0.176143	-0.866025	-0.938725	0.0576689	0.0180397		13.2914	19.5326	5.54772	5.31656	5.43214
ENSG00000180900	SCRIB	PC	scribbled planar cell polarity protein	This gene encodes a protein that was identified as being similar to the Drosophila scribble protein. The mammalian protein is involved in tumor suppression pathways. As a scaffold protein involved in cell polarization processes, this protein binds to many other proteins. The encoded protein binds to papillomavirus E6 protein via its PDZ domain and the C-terminus of E6. Two alternatively spliced t…	hsa04390 (Hippo signaling pathway), hsa04530 (Tight junction), hsa05165 (Human papillomavirus infection), hsa05203 (Viral carcinogenesis), GO:0001843 (neural tube closure), GO:0001921 (positive regulation of receptor recycling), GO:0007268 (synaptic transmission), GO:0008105 (asymmetric protein localization), GO:0008283 (cell proliferation), GO:0016032 (viral process), GO:0016080 (synaptic vesicl…			-0.627309	-0.318123		0.286616	0.3145	0.344316				378.733	86.2959	85.3918	0.795556	6.76743	53.4997	5.47654e-05	0.00182671	4.96069e-10	4.60452e-10	0.2	0.354767	0.0850855	0.866025	0.980212	0.0576689	0.00333144		67.1505	83.6781	128.291	130.834	133.607
ENSG00000266086	AC015813.2	PC						0.366437	0.970938		-0.531007	-0.357546	-0.448823				376.719	87.5138	10.2555	-1.16372	6.90011	53.0627	5.6491e-05	0.00187893	2.1823e-11	2.17318e-11	0.2	0.354767	0.227874	-0.866025	-0.897608	0.0576689	0.0387213		141.236	215.783	74.8942	84.7182	79.4017
ENSG00000100292	HMOX1	PC	heme oxygenase 1	Heme oxygenase, an essential enzyme in heme catabolism, cleaves heme to form biliverdin, which is subsequently converted to bilirubin by biliverdin reductase, and carbon monoxide, a putative neurotransmitter. Heme oxygenase activity is induced by its substrate heme and by various nonheme substances. Heme oxygenase occurs as 2 isozymes, an inducible heme oxygenase-1 and a constitutive heme oxygena…	hsa00860 (Porphyrin and chlorophyll metabolism), hsa01100 (Metabolic pathways), hsa04066 (HIF-1 signaling pathway), hsa04216 (Ferroptosis), hsa04978 (Mineral absorption), hsa05200 (Pathways in cancer), hsa05206 (MicroRNAs in cancer), hsa05225 (Hepatocellular carcinoma), hsa05418 (Fluid shear stress and atherosclerosis), GO:0001525 (angiogenesis), GO:0001935 (endothelial cell proliferation), GO:00…			-0.646619	-0.411707		0.360341	0.404698	0.293286				376.382	61.7068	22.3083	0.941532	4.97121	52.9897	5.67859e-05	0.0018834	2.39537e-09	2.83201e-09	0.2	0.354767	0.025522	0.866025	0.986431	0.0576689	0.00189345		18.2612	21.8441	38.7184	39.9898	36.8692
ENSG00000137575	SDCBP	PC	syndecan binding protein	The protein encoded by this gene was initially identified as a molecule linking syndecan-mediated signaling to the cytoskeleton. The syntenin protein contains tandemly repeated PDZ domains that bind the cytoplasmic, C-terminal domains of a variety of transmembrane proteins. This protein may also affect cytoskeletal-membrane organization, cell adhesion, protein trafficking, and the activation of t…	GO:0002091 (negative regulation of receptor internalization), GO:0006612 (protein targeting to membrane), GO:0006930 (substrate-dependent cell migration, cell extension), GO:0007268 (synaptic transmission), GO:0007346 (regulation of mitotic cell cycle), GO:0008284 (positive regulation of cell proliferation), GO:0010718 (positive regulation of epithelial to mesenchymal transition), GO:0010862 (pos…			0.278758	0.471376		-0.239905	-0.224663	-0.285566				375.757	92.7093	49.1993	-0.634393	7.61264	52.8546	5.73366e-05	0.00189631	4.1559e-09	4.22415e-09	0.2	0.354767	0.114465	-0.866025	-0.970318	0.0576689	0.00611129		231.848	265.25	161.231	162.964	156.145
ENSG00000174695	TMEM167A	PC	transmembrane protein 167A		GO:0009306 (protein secretion), GO:0046907 (intracellular transport), GO:0000139 (Golgi membrane), GO:0012505 (endomembrane system), GO:0016021 (integral component of membrane)			0.632465	0.897047		-0.717365	-0.596852	-0.215294				375.439	50.7623	63.9779	-1.39787	4.32156	52.7857	5.76197e-05	0.00190032	1.30346e-10	1.47404e-10	0.2	0.354767	0.0535572	-0.866025	-0.966351	0.0576689	0.00737199		28.432	34.5576	9.93966	10.9799	14.9095
ENSG00000100284	TOM1	PC	target of myb1 membrane trafficking protein	This gene was identified as a target of the v-myb oncogene. The encoded protein shares its N-terminal domain in common with proteins associated with vesicular trafficking at the endosome. It is recruited to the endosomes by its interaction with endofin. Several alternatively spliced transcript variants encoding different isoforms have been found for this gene. [provided by RefSeq, Oct 2008].	GO:0006886 (intracellular protein transport), GO:0006897 (endocytosis), GO:0015031 (protein transport), GO:0016197 (endosomal transport), GO:0043312 (neutrophil degranulation), GO:0005737 (cytoplasm), GO:0005768 (endosome), GO:0005769 (early endosome), GO:0005829 (cytosol), GO:0005886 (plasma membrane), GO:0016020 (membrane), GO:0035577 (azurophil granule membrane), GO:0035579 (specific granule m…			-0.567052	-0.567052		0.26592	0.443079	0.425105				374.542	50.6516	45	1.05854	4.3132	51.5651	6.29369e-05	0.00197745	1.13036e-08	1.39177e-08	0.138641	0.354767	0.00625842	0.888523	0.98457	0.043925	0.00229539		11.9045	11.9045	22.7688	26.0049	25.6582
ENSG00000284503	MIR3652	miRNA	microRNA 3652					-0.499971	-0.428409		0.373575	0.302695	0.25211				374.359	64.262	0.741056	0.823505	5.12055	52.5524	5.85921e-05	0.00192204	1.074e-08	1.24481e-08	0.2	0.354767	0.000794652	0.866025	0.990422	0.0576689	0.00112355		22.9999	24.2713	43.8038	41.6079	40.1054
ENSG00000168003	SLC3A2	PC	solute carrier family 3 member 2	This gene is a member of the solute carrier family and encodes a cell surface, transmembrane protein. The protein exists as the heavy chain of a heterodimer, covalently bound through di-sulfide bonds to one of several possible light chains. The encoded transporter plays a role in regulation of intracellular calcium levels and transports L-type amino acids. Alternatively spliced transcript variant…	hsa04150 (mTOR signaling pathway), hsa04216 (Ferroptosis), hsa04974 (Protein digestion and absorption), GO:0005975 (carbohydrate metabolic process), GO:0006569 (tryptophan catabolic process), GO:0006816 (calcium ion transport), GO:0006865 (amino acid transport), GO:0015827 (tryptophan transport), GO:0016049 (cell growth), GO:0035725 (sodium ion transmembrane transport), GO:0043330 (response to ex…			-0.379424	-0.303518		0.275187	0.216804	0.190951				374.344	97.4619	28.9182	0.571607	8.8815	52.5491	5.86057e-05	0.00192204	1.29254e-08	1.31468e-08	0.2	0.354767	0.00180517	0.866025	0.990579	0.0576689	0.00109613		355.285	374.586	560.435	538.128	528.536
ENSG00000155827	RNF20	PC	ring finger protein 20	The protein encoded by this gene shares similarity with BRE1 of S. cerevisiae. The protein encoded by this human gene is an E3 ubiquitin ligase that regulates chromosome structure by monoubiquitinating histone H2B. This protein acts as a putative tumor suppressor and positively regulates the p53 tumor suppressor as well as numerous histone H2A and H2B genes. In contrast, this protein also suppres…	GO:0000209 (protein polyubiquitination), GO:0006355 (regulation of transcription, DNA-templated), GO:0006511 (ubiquitin-dependent protein catabolic process), GO:0010390 (histone monoubiquitination), GO:0016567 (protein ubiquitination), GO:0030336 (negative regulation of cell migration), GO:0031062 (positive regulation of histone methylation), GO:0033523 (histone H2B ubiquitination), GO:0045893 (p…			0.580514	0.655377		-0.489652	-0.50316	-0.243079				373.869	46.5122	33.8416	-1.15048	4.07081	52.4467	5.9039e-05	0.00192655	2.24682e-09	2.56035e-09	0.2	0.354767	0.00124789	-0.866025	-0.989553	0.0576689	0.00127982		24.0401	25.427	10.402	10.2864	12.7135
ENSG00000187954	CYHR1	PC	cysteine and histidine rich 1		GO:0005654 (nucleoplasm), GO:0048471 (perinuclear region of cytoplasm), GO:0005515 (protein binding), GO:0008270 (zinc ion binding)			-0.74354	-0.431374		0.286842	0.431957	0.456116				373.529	60.9658	73.0153	1.04701	4.92475	52.3732	5.93523e-05	0.00192655	8.70547e-10	1.04223e-09	0.2	0.354767	0.0209259	0.866025	0.976904	0.0576689	0.00419873		16.1808	20.5728	35.1355	39.0652	39.7586
ENSG00000123472	ATPAF1	PC	ATP synthase mitochondrial F1 complex assembly factor 1	This gene encodes an assembly factor for the F(1) component of the mitochondrial ATP synthase. This protein binds specifically to the F1 beta subunit and is thought to prevent this subunit from forming nonproductive homooligomers during enzyme assembly. Alternatively spliced transcript variants have been identified. [provided by RefSeq, Aug 2011].	GO:0033615 (mitochondrial proton-transporting ATP synthase complex assembly), GO:0005739 (mitochondrion), GO:0005515 (protein binding)			0.664595	0.310061		-0.338896	-0.367709	-0.268051				373.344	82.1906	41.925	-0.8421	6.37758	52.3334	5.95229e-05	0.00192655	6.24795e-10	6.41034e-10	0.2	0.354767	0.171803	-0.866025	-0.938419	0.0576689	0.0181742		126.904	98.8187	62.2962	61.0249	65.5324
ENSG00000131236	CAP1	PC	cyclase associated actin cytoskeleton regulatory protein 1	The protein encoded by this gene is related to the S. cerevisiae CAP protein, which is involved in the cyclic AMP pathway. The human protein is able to interact with other molecules of the same protein, as well as with CAP2 and actin. Alternatively spliced transcript variants have been identified. [provided by RefSeq, Jul 2008].	GO:0000902 (cell morphogenesis), GO:0001667 (ameboidal-type cell migration), GO:0006898 (receptor-mediated endocytosis), GO:0007163 (establishment or maintenance of cell polarity), GO:0007165 (signal transduction), GO:0007190 (activation of adenylate cyclase activity), GO:0008154 (actin polymerization or depolymerization), GO:0043312 (neutrophil degranulation), GO:0005576 (extracellular region), …			0.298994	0.368935		-0.247413	-0.174527	-0.24599				373.143	95.2645	37.4872	-0.560503	8.13664	52.2901	5.97091e-05	0.00192655	1.43788e-08	1.45317e-08	0.2	0.354767	0.0197636	-0.866025	-0.992129	0.0576689	0.000837283		340.029	357.019	232.195	244.331	232.426
ENSG00000139684	ESD	PC	esterase D	This gene encodes a serine hydrolase that belongs to the esterase D family. The encoded enzyme is active toward numerous substrates including O-acetylated sialic acids, and it may be involved in the recycling of sialic acids. This gene is used as a genetic marker for retinoblastoma and Wilson_s disease. [provided by RefSeq, Feb 2009]. Publication Note: This RefSeq record includes a subset of the …	hsa01200 (Carbon metabolism), GO:0008150 (biological_process), GO:0046294 (formaldehyde catabolic process), GO:1901687 (glutathione derivative biosynthetic process), GO:0005788 (endoplasmic reticulum lumen), GO:0031410 (cytoplasmic vesicle), GO:0070062 (extracellular vesicular exosome), GO:0005515 (protein binding), GO:0016788 (hydrolase activity, acting on ester bonds), GO:0018738 (S-formylgluta…			0.298112	0.473049		-0.323291	-0.172899	-0.274971				373.092	94.8216	40.3918	-0.648627	8.06783	52.2792	5.97564e-05	0.00192655	3.25537e-09	3.28126e-09	0.2	0.354767	0.0803939	-0.866025	-0.970226	0.0576689	0.00613954		321.652	363.375	208.386	231.502	215.552
ENSG00000101558	VAPA	PC	VAMP associated protein A	The protein encoded by this gene is a type IV membrane protein. It is present in the plasma membrane and intracellular vesicles. It may also be associated with the cytoskeleton. This protein may function in vesicle trafficking, membrane fusion, protein complex assembly and cell motility. Alternative splicing occurs at this locus and two transcript variants encoding distinct isoforms have been ide…	hsa04979 (Cholesterol metabolism), GO:0006888 (ER to Golgi vesicle-mediated transport), GO:0007165 (signal transduction), GO:0008219 (cell death), GO:0030148 (sphingolipid biosynthetic process), GO:0031175 (neuron projection development), GO:0043123 (positive regulation of I-kappaB kinase/NF-kappaB signaling), GO:0043312 (neutrophil degranulation), GO:0044791 (positive regulation by host of viral…			0.32801	0.357954		-0.157185	-0.23722	-0.291559				372.785	95.6648	66.4906	-0.57435	8.24162	52.213	6.00425e-05	0.00192655	1.09014e-08	1.09939e-08	0.2	0.354767	0.000703991	-0.866025	-0.991436	0.0576689	0.000950158		372.737	380.596	265.712	251.265	241.904
ENSG00000103035	PSMD7	PC	proteasome 26S subunit, non-ATPase 7	The 26S proteasome is a multicatalytic proteinase complex with a highly ordered structure composed of 2 complexes, a 20S core and a 19S regulator. The 20S core is composed of 4 rings of 28 non-identical subunits; 2 rings are composed of 7 alpha subunits and 2 rings are composed of 7 beta subunits. The 19S regulator is composed of a base, which contains 6 ATPase subunits and 2 non-ATPase subunits,…	hsa03050 (Proteasome), hsa05169 (Epstein-Barr virus infection), GO:0000165 (MAPK cascade), GO:0000209 (protein polyubiquitination), GO:0002223 (stimulatory C-type lectin receptor signaling pathway), GO:0002479 (antigen processing and presentation of exogenous peptide antigen via MHC class I, TAP-dependent), GO:0006521 (regulation of cellular amino acid metabolic process), GO:0010972 (negative reg…			0.33097	0.330138		-0.225451	-0.188017	-0.247641				372.71	90.9037	23.4583	-0.55744	7.32614	52.1968	6.0113e-05	0.00192655	2.11842e-08	2.17777e-08	0.2	0.354767	0.000666859	-0.866025	-0.998312	0.0576689	8.32127e-05		198.446	198.331	134.301	137.884	132.221
ENSG00000197483	ZNF628	PC	zinc finger protein 628	Zinc finger proteins (ZNFs), which bind nucleic acids, perform many key functions, the most important of which is regulating transcription. See ZNF91 (MIM 603971) for general information on ZNFs.[supplied by OMIM, Mar 2008]. Sequence Note: This RefSeq record was created from transcript and genomic sequence data to make the sequence consistent with the reference genome assembly. The genomic coordi…	GO:0006351 (transcription, DNA-templated), GO:0006355 (regulation of transcription, DNA-templated), GO:0005634 (nucleus), GO:0003677 (DNA binding), GO:0003700 (sequence-specific DNA binding transcription factor activity), GO:0046872 (metal ion binding)			-0.733404	-0.551244		0.471638	0.366862	0.446149				372.551	40.4736	83.6371	1.26328	3.7474	52.1626	6.02617e-05	0.00192655	4.87262e-09	6.41388e-09	0.2	0.354767	0.00464453	0.866025	0.993027	0.0576689	0.000698197		6.58791	7.74369	17.7989	16.412	17.4522
ENSG00000179564	LSMEM2	PC	leucine rich single-pass membrane protein 2		GO:0016021 (integral component of membrane), GO:0005515 (protein binding)			-0.746478	-0.427007		0.369629	0.325547	0.478309				372.449	60.3952	53.3646	1.04671	4.88806	52.1407	6.03575e-05	0.00192655	9.879e-10	1.18472e-09	0.2	0.354767	0.0280433	0.866025	0.979138	0.0576689	0.00360574		15.7185	20.1105	36.4069	35.2511	39.4119
ENSG00000242697	RPL5P12	p_Pg	ribosomal protein L5 pseudogene 12					1.86113	0.629285		-0.98926	-0.638522	-0.862634				372.414	53.2919	15.6985	-2.45407	4.47939	52.1331	6.03908e-05	0.00192655	1.85232e-12	2.27552e-12	0.2	0.354767	0.302482	-0.866025	-0.832051	0.0576689	0.0805089		61.6028	25.0803	6.81907	9.24619	7.62811
ENSG00000225648	SBDSP1	transcribed_u_Pg	SBDS, ribosome maturation factor pseudogene 1					0.654707	0.422149		-0.308261	-0.287128	-0.481468				372.246	59.5861	12.6746	-0.962159	4.84925	52.0971	6.05481e-05	0.00192655	2.83071e-09	3.07377e-09	0.2	0.354767	0.0895464	-0.866025	-0.970492	0.0576689	0.00605776		43.8038	36.9848	21.4974	21.8441	18.8391
ENSG00000270069	MIR222HG	lincRNA	MIR222 host gene					0.443628	0.710614		-0.38806	-0.275566	-0.490617				371.313	55.0549	57.2913	-1.04709	4.58042	51.8963	6.14363e-05	0.00194952	2.70184e-09	2.97104e-09	0.2	0.354767	0.103544	-0.866025	-0.966805	0.0576689	0.00722391		30.9747	37.6782	16.5276	18.0301	15.2562
ENSG00000143162	CREG1	PC	cellular repressor of E1A stimulated genes 1	The adenovirus E1A protein both activates and represses gene expression to promote cellular proliferation and inhibit differentiation. The protein encoded by this gene antagonizes transcriptional activation and cellular transformation by E1A. This protein shares limited sequence similarity with E1A and binds both the general transcription factor TBP and the tumor suppressor pRb in vitro. This gen…	GO:0006357 (regulation of transcription from RNA polymerase II promoter), GO:0007275 (multicellular organismal development), GO:0008283 (cell proliferation), GO:0040008 (regulation of growth), GO:0043312 (neutrophil degranulation), GO:0055114 (oxidation-reduction process), GO:1903507 (negative regulation of nucleic acid-templated transcription), GO:0005576 (extracellular region), GO:0005615 (extr…			0.398317	0.4584		-0.244056	-0.363808	-0.248852				370.544	67.8562	47.5213	-0.747823	5.34882	51.7312	6.21788e-05	0.00196777	1.16975e-08	1.24596e-08	0.2	0.354767	0.00309952	-0.866025	-0.993316	0.0576689	0.000655338		52.3566	54.6681	32.824	30.0501	32.7084
ENSG00000204977	TRIM13	PC	tripartite motif containing 13	This gene encodes a member of the tripartite motif (TRIM) family. The TRIM motif includes three zinc-binding domains, a RING, a B-box type 1 and a B-box type 2, and a coiled-coil region. This gene is located on chromosome 13 within the minimal deletion region for B-cell chronic lymphocytic leukemia. Multiple alternatively spliced transcript variants have been found for this gene. [provided by Ref…	GO:0007165 (signal transduction), GO:0009653 (anatomical structure morphogenesis), GO:0010332 (response to gamma radiation), GO:0010942 (positive regulation of cell death), GO:0016239 (positive regulation of macroautophagy), GO:0030433 (ER-associated ubiquitin-dependent protein catabolic process), GO:0032897 (negative regulation of viral transcription), GO:0043123 (positive regulation of I-kappaB…			0.431951	0.700468		-0.41811	-0.327157	-0.387151				369.289	51.6736	72.6917	-1.0419	4.37878	51.4622	6.34123e-05	0.00197745	6.52112e-09	7.23836e-09	0.2	0.354767	0.117876	-0.866025	-0.969584	0.0576689	0.00633854		26.814	32.7084	13.9849	15.0251	14.3316
ENSG00000163788	SNRK	PC	SNF related kinase	SNRK is a member of the sucrose nonfermenting (SNF)-related kinase family of serine/threonine kinases (Kertesz et al., 2002 [PubMed 12234663]).[supplied by OMIM, Apr 2009].	GO:0006468 (protein phosphorylation), GO:0030099 (myeloid cell differentiation), GO:0035556 (intracellular signal transduction), GO:0005634 (nucleus), GO:0005737 (cytoplasm), GO:0000287 (magnesium ion binding), GO:0004674 (protein serine/threonine kinase activity), GO:0005524 (ATP binding)			0.554236	1.07045		-0.550857	-0.456333	-0.617499				369.273	22.3576	80.9966	-1.84471	2.73993	51.4588	6.3428e-05	0.00197745	8.75634e-10	1.15207e-09	0.2	0.354767	0.176998	-0.866025	-0.936431	0.0576689	0.0190556		9.01504	13.7537	3.12059	3.46732	2.88944
ENSG00000015171	ZMYND11	PC	zinc finger MYND-type containing 11	The protein encoded by this gene was first identified by its ability to bind the adenovirus E1A protein. The protein localizes to the nucleus. It functions as a transcriptional repressor, and expression of E1A inhibits this repression. Alternatively spliced transcript variants encoding different isoforms have been identified. [provided by RefSeq, Jul 2008].	GO:0000122 (negative regulation of transcription from RNA polymerase II promoter), GO:0006351 (transcription, DNA-templated), GO:0007049 (cell cycle), GO:0008283 (cell proliferation), GO:0016032 (viral process), GO:0016569 (covalent chromatin modification), GO:0034243 (regulation of transcription elongation from RNA polymerase II promoter), GO:0043124 (negative regulation of I-kappaB kinase/NF-ka…			0.543842	0.570157		-0.309186	-0.370428	-0.434385				369.094	45.7797	84.3271	-1.04256	4.03261	51.4205	6.36062e-05	0.00197745	1.30252e-08	1.48029e-08	0.2	0.354767	8.47993e-05	-0.866025	-0.997773	0.0576689	0.000126106		23.1155	23.5778	11.9045	11.3266	10.7487
ENSG00000135521	LTV1	PC	LTV1 ribosome biogenesis factor		GO:0000056 (ribosomal small subunit export from nucleus), GO:0006364 (rRNA processing), GO:0042274 (ribosomal small subunit biogenesis), GO:0005634 (nucleus), GO:0005654 (nucleoplasm), GO:0005829 (cytosol), GO:0030688 (preribosome, small subunit precursor), GO:0031902 (late endosome membrane), GO:0034448 (EGO complex), GO:0005515 (protein binding), R-HSA-6791226 (Homo sapiens: Major pathway of rR…			0.593519	0.323797		-0.216178	-0.381628	-0.31951				368.953	79.8058	68.4838	-0.790004	6.1866	51.3901	6.37479e-05	0.00197745	1.73444e-09	1.80097e-09	0.2	0.354767	0.128408	-0.866025	-0.955103	0.0576689	0.0113425		106.447	87.9544	59.8691	53.1656	55.5927
ENSG00000082146	STRADB	PC	STE20-related kinase adaptor beta	This gene encodes a protein that belongs to the serine/threonine protein kinase STE20 subfamily. One of the active site residues in the protein kinase domain of this protein is altered, and it is thus a pseudokinase. This protein is a component of a complex involved in the activation of serine/threonine kinase 11, a master kinase that regulates cell polarity and energy-generating metabolism. This…	hsa04150 (mTOR signaling pathway), hsa04152 (AMPK signaling pathway), GO:0000902 (cell morphogenesis), GO:0006611 (protein export from nucleus), GO:0007050 (cell cycle arrest), GO:0032147 (activation of protein kinase activity), GO:2001240 (negative regulation of extrinsic apoptotic signaling pathway in absence of ligand), GO:0005634 (nucleus), GO:0005737 (cytoplasm), GO:0005829 (cytosol), GO:001…			0.393489	0.704764		-0.328517	-0.328517	-0.441219				368.828	57.7378	20.3322	-0.99212	4.74118	50.3611	6.87859e-05	0.00203943	5.25098e-09	5.71035e-09	0.138641	0.354767	0.13761	-0.888523	-0.957675	0.043925	0.0103861		33.5175	42.0702	19.5326	19.5326	17.9145
ENSG00000125912	NCLN	PC	nicalin		GO:0009966 (regulation of signal transduction), GO:0031648 (protein destabilization), GO:0043254 (regulation of protein complex assembly), GO:0005789 (endoplasmic reticulum membrane), GO:0016020 (membrane), GO:0016021 (integral component of membrane), GO:0005515 (protein binding)			-0.503806	-0.29647		0.23006	0.3028	0.267415				368.544	88.7488	58.6882	0.674226	7.05661	51.3027	6.41577e-05	0.00197745	4.67944e-09	4.49603e-09	0.2	0.354767	0.0559019	0.866025	0.983924	0.0576689	0.00244092		90.7283	105.06	152.215	160.19	156.261
ENSG00000198886	MT-ND4	PC	mitochondrially encoded NADH:ubiquinone oxidoreductase core subunit 4		hsa00190 (Oxidative phosphorylation), hsa01100 (Metabolic pathways), hsa04714 (Thermogenesis), hsa04723 (Retrograde endocannabinoid signaling), hsa05012 (Parkinson disease), R-HSA-1428517 (Homo sapiens: The citric acid (TCA) cycle and respiratory electron transport), R-HSA-1430728 (Homo sapiens: Metabolism), R-HSA-163200 (Homo sapiens: Respiratory electron transport, ATP synthesis by chemiosmotic…			0.494981	0.54363		-0.401066	-0.129712	-0.507832				368.454	99.9915	47.2232	-0.856928	13.6371	51.2835	6.42483e-05	0.00197745	2.31888e-09	2.30298e-09	0.2	0.354767	0.00490568	-0.866025	-0.975519	0.0576689	0.00458108		17127.6	17715.1	9202.74	11107.6	8546.14
ENSG00000198618	PPIAP22	p_Pg	peptidylprolyl isomerase A pseudogene 22					-0.681786	-0.798894		0.662945	0.369261	0.448474				368.325	28.9413	3.85009	1.62555	3.10028	51.2559	6.43787e-05	0.00197745	2.9297e-09	4.285e-09	0.2	0.354767	0.00786262	0.866025	0.971559	0.0576689	0.00573316		3.92963	3.46732	13.0602	10.2864	10.9799
ENSG00000269335	IKBKG	PC	inhibitor of nuclear factor kappa B kinase subunit gamma	This gene encodes the regulatory subunit of the inhibitor of kappaB kinase (IKK) complex, which activates NF-kappaB resulting in activation of genes involved in inflammation, immunity, cell survival, and other pathways. Mutations in this gene result in incontinentia pigmenti, hypohidrotic ectodermal dysplasia, and several other types of immunodeficiencies. Multiple transcript variants encoding di…	hsa01523 (Antifolate resistance), hsa04010 (MAPK signaling pathway), hsa04014 (Ras signaling pathway), hsa04062 (Chemokine signaling pathway), hsa04064 (NF-kappa B signaling pathway), hsa04151 (PI3K-Akt signaling pathway), hsa04210 (Apoptosis), hsa04380 (Osteoclast differentiation), hsa04620 (Toll-like receptor signaling pathway), hsa04621 (NOD-like receptor signaling pathway), hsa04622 (RIG-I-li…			-0.812932	-0.461076		0.586717	0.388325	0.298967				368.299	62.8056	43.2709	1.13237	5.03363	51.2502	6.44057e-05	0.00197745	4.07374e-10	4.88947e-10	0.2	0.354767	0.0112673	0.866025	0.958862	0.0576689	0.00995393		16.412	21.4974	46.5777	40.3365	37.7938
ENSG00000141429	GALNT1	PC	polypeptide N-acetylgalactosaminyltransferase 1	This gene encodes a member of the UDP-N-acetyl-alpha-D-galactosamine:polypeptide N-acetylgalactosaminyltransferase (GalNAc-T) family of enzymes. GalNAc-Ts initiate mucin-type O-linked glycosylation in the Golgi apparatus by catalyzing the transfer of GalNAc to serine and threonine residues on target proteins. They are characterized by an N-terminal transmembrane domain, a stem region, a lumenal c…	hsa00512 (Mucin type O-glycan biosynthesis), hsa01100 (Metabolic pathways), GO:0006493 (protein O-linked glycosylation), GO:0016266 (O-glycan processing), GO:0018242 (protein O-linked glycosylation via serine), GO:0018243 (protein O-linked glycosylation via threonine), GO:0000139 (Golgi membrane), GO:0005576 (extracellular region), GO:0005789 (endoplasmic reticulum membrane), GO:0005794 (Golgi ap…			0.334826	0.583709		-0.327858	-0.318438	-0.272239				368.279	69.6874	61.0733	-0.805212	5.46511	51.2459	6.44257e-05	0.00197745	5.71774e-09	6.04838e-09	0.2	0.354767	0.128507	-0.866025	-0.965164	0.0576689	0.00776428		53.8591	64.3766	33.2863	33.5175	34.6732
ENSG00000141452	RMC1	PC	regulator of MON1-CCZ1	This gene encodes a colon cancer associated protein. [provided by RefSeq, Jan 2013].	GO:0005765 (lysosomal membrane)			0.544072	0.445662		-0.452055	-0.177509	-0.360171				368.118	66.519	31.1329	-0.863718	5.2611	51.2115	6.45888e-05	0.00197745	2.73024e-09	2.91605e-09	0.2	0.354767	0.0049443	-0.866025	-0.981704	0.0576689	0.00296265		54.0902	50.3918	26.1205	32.0149	27.9697
ENSG00000100479	POLE2	PC	DNA polymerase epsilon 2, accessory subunit		hsa01100 (Metabolic pathways), hsa03030 (DNA replication), hsa03410 (Base excision repair), hsa03420 (Nucleotide excision repair), GO:0000082 (G1/S transition of mitotic cell cycle), GO:0000722 (telomere maintenance via recombination), GO:0006260 (DNA replication), GO:0006261 (DNA-dependent DNA replication), GO:0006270 (DNA replication initiation), GO:0006281 (DNA repair), GO:0042276 (error-prone…			0.859785	0.69518		-0.783078	-0.514087	-0.257801				368.088	40.2351	19.1482	-1.48862	3.73493	51.2051	6.46191e-05	0.00197745	2.81001e-10	3.32097e-10	0.2	0.354767	0.012108	-0.866025	-0.979543	0.0576689	0.00350142		22.6532	19.9949	5.89445	7.51253	9.36177
ENSG00000181019	NQO1	PC	NAD(P)H quinone dehydrogenase 1	This gene is a member of the NAD(P)H dehydrogenase (quinone) family and encodes a cytoplasmic 2-electron reductase. This FAD-binding protein forms homodimers and reduces quinones to hydroquinones. This protein_s enzymatic activity prevents the one electron reduction of quinones that results in the production of radical species. Mutations in this gene have been associated with tardive dyskinesia (…	hsa00130 (Ubiquinone and other terpenoid-quinone biosynthesis), hsa05200 (Pathways in cancer), hsa05225 (Hepatocellular carcinoma), hsa05418 (Fluid shear stress and atherosclerosis), GO:0006521 (regulation of cellular amino acid metabolic process), GO:0006805 (xenobiotic metabolic process), GO:0006809 (nitric oxide biosynthetic process), GO:0007271 (synaptic transmission, cholinergic), GO:0007568…			-0.358668	-0.309413		0.272499	0.228944	0.166639				367.913	98.5862	48.092	0.55863	9.6625	51.1677	6.47974e-05	0.00197745	2.21927e-08	2.27939e-08	0.2	0.354767	0.00117453	0.866025	0.988153	0.0576689	0.00154523		620.304	641.917	961.835	933.172	893.645
ENSG00000170035	UBE2E3	PC	ubiquitin conjugating enzyme E2 E3	The modification of proteins with ubiquitin is an important cellular mechanism for targeting abnormal or short-lived proteins for degradation. Ubiquitination involves at least three classes of enzymes: ubiquitin-activating enzymes, or E1s, ubiquitin-conjugating enzymes, or E2s, and ubiquitin-protein ligases, or E3s. This gene encodes a member of the E2 ubiquitin-conjugating enzyme family. The enc…	hsa04120 (Ubiquitin mediated proteolysis), GO:0016567 (protein ubiquitination), GO:0040008 (regulation of growth), GO:0070534 (protein K63-linked ubiquitination), GO:0070936 (protein K48-linked ubiquitination), GO:0070979 (protein K11-linked ubiquitination), GO:0005654 (nucleoplasm), GO:0005829 (cytosol), GO:0004842 (ubiquitin-protein transferase activity), GO:0005515 (protein binding), GO:000552…			0.343687	0.306575		-0.209643	-0.237972	-0.202647				367.868	91.321	14.5741	-0.548318	7.37578	51.1582	6.48427e-05	0.00197745	3.09041e-08	3.17224e-08	0.2	0.354767	0.0111871	-0.866025	-0.997931	0.0576689	0.000112932		207.346	202.029	140.658	137.884	141.351
ENSG00000205208	C4orf46	PC	chromosome 4 open reading frame 46	This gene encodes a small, conserved protein of unknown function that is expressed in a variety of tissues. There are pseudogenes for this gene on chromosomes 6, 8, 16, and X. Alternative splicing results in multiple transcript variants. [provided by RefSeq, Feb 2013].	GO:0005737 (cytoplasm), GO:0005515 (protein binding)			0.637344	0.882586		-0.764753	-0.403726	-0.351451				367.557	37.3818	86.414	-1.48608	3.58181	51.0916	6.5161e-05	0.00198201	5.3856e-10	6.4271e-10	0.2	0.354767	0.0561451	-0.866025	-0.973927	0.0576689	0.00503403		17.3366	20.9195	5.31656	7.39695	7.74369
ENSG00000167766	ZNF83	PC	zinc finger protein 83		GO:0006351 (transcription, DNA-templated), GO:0006355 (regulation of transcription, DNA-templated), GO:0005634 (nucleus), GO:0003677 (DNA binding), GO:0003700 (sequence-specific DNA binding transcription factor activity), GO:0005515 (protein binding), GO:0046872 (metal ion binding)			0.515262	1.06286		-0.493035	-0.59205	-0.493035				367.314	30.6788	50.4855	-1.66062	3.20525	50.0438	7.04374e-05	0.00207009	1.96413e-09	2.40925e-09	0.138641	0.354767	0.190651	-0.888523	-0.92799	0.043925	0.0229445		12.0201	18.4924	4.96983	4.50752	4.96983
ENSG00000169607	CKAP2L	PC	cytoskeleton associated protein 2 like		GO:0000922 (spindle pole), GO:0005813 (centrosome), GO:0005829 (cytosol), GO:0072686 (mitotic spindle)			0.528042	0.40596		-0.232325	-0.440038	-0.261639				366.513	67.5666	56.5843	-0.815056	5.33153	50.8688	6.62411e-05	0.00200966	5.13698e-09	5.46913e-09	0.2	0.354767	0.0201694	-0.866025	-0.982362	0.0576689	0.00280453		56.4018	51.6631	32.4773	27.8542	31.7838
ENSG00000067334	DNTTIP2	PC	deoxynucleotidyltransferase terminal interacting protein 2	This gene is thought to be involved in chromatin remodeling and gene transcription. The encoded nuclear protein binds to and enhances the transcriptional activity of the estrogen receptor alpha, and also interacts with terminal deoxynucleotidyltransferase. The expression profile of this gene is a potential biomarker for chronic obstructive pulmonary disease. [provided by RefSeq, Dec 2010].	GO:0006351 (transcription, DNA-templated), GO:0006355 (regulation of transcription, DNA-templated), GO:0005634 (nucleus), GO:0005730 (nucleolus), GO:0003723 (RNA binding)			0.718141	0.321014		-0.23632	-0.431926	-0.370908				366.332	88.9107	71.9336	-0.890196	7.07527	50.8302	6.64308e-05	0.00201022	3.48259e-10	3.51346e-10	0.2	0.354767	0.177932	-0.866025	-0.927711	0.0576689	0.0230767		211.738	160.306	108.296	94.3112	98.472
ENSG00000109536	FRG1	PC	FSHD region gene 1	This gene maps to a location 100 kb centromeric of the repeat units on chromosome 4q35 which are deleted in facioscapulohumeral muscular dystrophy (FSHD). It is evolutionarily conserved and has related sequences on multiple human chromosomes but DNA sequence analysis did not reveal any homology to known genes. In vivo studies demonstrate the encoded protein is localized to the nucleolus. [provide…	GO:0000398 (mRNA splicing, via spliceosome), GO:0006364 (rRNA processing), GO:0007517 (muscle organ development), GO:0005730 (nucleolus), GO:0015030 (Cajal body), GO:0030018 (Z disc), GO:0055120 (striated muscle dense body), GO:0071013 (catalytic step 2 spliceosome), GO:0003723 (RNA binding), GO:0005515 (protein binding), GO:0051015 (actin filament binding)			0.628646	0.37274		-0.252956	-0.273287	-0.475143				365.91	72.3618	9.77853	-0.870264	5.63445	50.7403	6.68743e-05	0.00201294	1.69758e-09	1.77349e-09	0.2	0.354767	0.102483	-0.866025	-0.95962	0.0576689	0.00968139		74.0851	61.7183	39.2963	38.7184	33.4019
ENSG00000164338	UTP15	PC	UTP15, small subunit processome component		hsa03008 (Ribosome biogenesis in eukaryotes), GO:0006364 (rRNA processing), GO:0045943 (positive regulation of transcription from RNA polymerase I promoter), GO:2000234 (positive regulation of rRNA processing), GO:0001650 (fibrillar center), GO:0005654 (nucleoplasm), GO:0005730 (nucleolus), GO:0005737 (cytoplasm), GO:0005783 (endoplasmic reticulum), GO:0003723 (RNA binding), GO:0005515 (protein b…			0.526901	0.382259		-0.337555	-0.325081	-0.246524				365.839	63.1207	69.3952	-0.804487	5.0468	50.7251	6.69495e-05	0.00201294	1.59016e-08	1.71128e-08	0.2	0.354767	0.0647231	-0.866025	-0.985744	0.0576689	0.00203894		46.4621	41.839	24.618	24.8491	26.3517
ENSG00000092199	HNRNPC	PC	heterogeneous nuclear ribonucleoprotein C (C1/C2)	This gene belongs to the subfamily of ubiquitously expressed heterogeneous nuclear ribonucleoproteins (hnRNPs). The hnRNPs are RNA binding proteins and they complex with heterogeneous nuclear RNA (hnRNA). These proteins are associated with pre-mRNAs in the nucleus and appear to influence pre-mRNA processing and other aspects of mRNA metabolism and transport. While all of the hnRNPs are present in…	hsa03040 (Spliceosome), GO:0000398 (mRNA splicing, via spliceosome), GO:0001649 (osteoblast differentiation), GO:0008380 (RNA splicing), GO:0010467 (gene expression), GO:0032211 (negative regulation of telomere maintenance via telomerase), GO:0043044 (ATP-dependent chromatin remodeling), GO:0070935 (3'-UTR-mediated mRNA stabilization), GO:0000790 (nuclear chromatin), GO:0005634 (nucleus), GO:0005…			0.646192	0.302058		-0.220191	-0.421189	-0.30687				365.73	98.4414	40.9114	-0.800267	9.51141	50.7018	6.7065e-05	0.00201294	6.71784e-10	6.68382e-10	0.2	0.354767	0.162362	-0.866025	-0.934606	0.0576689	0.0198763		1096.48	863.363	600.54	522.179	565.405
ENSG00000269972	AC004542.1	lincRNA						0.548063	0.519186		-0.361596	-0.278122	-0.427531				365.295	49.7147	1.12436	-0.981769	4.25849	50.6092	6.75274e-05	0.00201294	1.64881e-08	1.84461e-08	0.2	0.354767	0.000173264	-0.866025	-0.996506	0.0576689	0.000247814		27.1607	26.5828	13.5226	14.4472	12.8291
ENSG00000198763	MT-ND2	PC	mitochondrially encoded NADH:ubiquinone oxidoreductase core subunit 2		hsa00190 (Oxidative phosphorylation), hsa01100 (Metabolic pathways), hsa04714 (Thermogenesis), hsa04723 (Retrograde endocannabinoid signaling), hsa05012 (Parkinson disease), R-HSA-1428517 (Homo sapiens: The citric acid (TCA) cycle and respiratory electron transport), R-HSA-1430728 (Homo sapiens: Metabolism), R-HSA-163200 (Homo sapiens: Respiratory electron transport, ATP synthesis by chemiosmotic…			0.500948	0.528042		-0.403878	-0.112533	-0.512579				365.282	99.8978	26.448	-0.847843	12.2426	50.6065	6.75414e-05	0.00201294	1.25882e-09	1.24982e-09	0.2	0.354767	0.00904696	-0.866025	-0.972593	0.0576689	0.00542428		6545.61	6669.74	3495.06	4277.64	3241.25
ENSG00000140416	TPM1	PC	tropomyosin 1	This gene is a member of the tropomyosin family of highly conserved, widely distributed actin-binding proteins involved in the contractile system of striated and smooth muscles and the cytoskeleton of non-muscle cells. Tropomyosin is composed of two alpha-helical chains arranged as a coiled-coil. It is polymerized end to end along the two grooves of actin filaments and provides stability to the f…	hsa04260 (Cardiac muscle contraction), hsa04261 (Adrenergic signaling in cardiomyocytes), hsa05206 (MicroRNAs in cancer), hsa05410 (Hypertrophic cardiomyopathy (HCM)), hsa05414 (Dilated cardiomyopathy (DCM)), GO:0001701 (in utero embryonic development), GO:0003065 (positive regulation of heart rate by epinephrine), GO:0006928 (cellular component movement), GO:0006936 (muscle contraction), GO:0006…			0.30241	0.33584		-0.21053	-0.167837	-0.259884				365.275	98.4669	35.4259	-0.532861	9.55931	50.6048	6.75494e-05	0.00201294	3.05349e-08	3.04217e-08	0.2	0.354767	0.000546466	-0.866025	-0.994595	0.0576689	0.000476609		915.026	936.524	640.646	659.947	619.033
ENSG00000115310	RTN4	PC	reticulon 4	This gene belongs to the family of reticulon encoding genes. Reticulons are associated with the endoplasmic reticulum, and are involved in neuroendocrine secretion or in membrane trafficking in neuroendocrine cells. The product of this gene is a potent neurite outgrowth inhibitor which may also help block the regeneration of the central nervous system in higher vertebrates. Alternatively spliced …	hsa05010 (Alzheimer disease), GO:0006915 (apoptotic process), GO:0007413 (axonal fasciculation), GO:0010634 (positive regulation of epithelial cell migration), GO:0021801 (cerebral cortex radial glia guided migration), GO:0030308 (negative regulation of cell growth), GO:0030517 (negative regulation of axon extension), GO:0033601 (positive regulation of mammary gland epithelial cell proliferation)…			0.37152	0.9471		-0.509208	-0.279602	-0.529811				364.769	90.1797	79.1908	-1.13809	7.22611	50.4973	6.80915e-05	0.00202396	5.65027e-11	5.64377e-11	0.2	0.354767	0.217106	-0.866025	-0.900723	0.0576689	0.0369857		178.105	266.406	95.8137	112.688	94.4268
ENSG00000112312	GMNN	PC	geminin, DNA replication inhibitor	This gene encodes a protein that plays a critical role in cell cycle regulation. The encoded protein inhibits DNA replication by binding to DNA replication factor Cdt1, preventing the incorporation of minichromosome maintenance proteins into the pre-replication complex. The encoded protein is expressed during the S and G2 phases of the cell cycle and is degraded by the anaphase-promoting complex …	GO:0006461 (protein complex assembly), GO:0008156 (negative regulation of DNA replication), GO:0009887 (organ morphogenesis), GO:0035563 (positive regulation of chromatin binding), GO:0045786 (negative regulation of cell cycle), GO:0045892 (negative regulation of transcription, DNA-templated), GO:0071163 (DNA replication preinitiation complex assembly), GO:2000104 (negative regulation of DNA-depe…			0.668466	0.284724		-0.265129	-0.378235	-0.309827				363.506	94.4809	16.2436	-0.812683	7.96548	50.2287	6.9469e-05	0.0020545	7.23501e-10	7.2556e-10	0.2	0.354767	0.187741	-0.866025	-0.927067	0.0576689	0.0233838		381.521	291.949	198.793	183.653	192.668
ENSG00000125817	CENPB	PC	centromere protein B	This gene product is a highly conserved protein that facilitates centromere formation. It is a DNA-binding protein that is derived from transposases of the pogo DNA transposon family. It contains a helix-loop-helix DNA binding motif at the N-terminus, and a dimerization domain at the C-terminus. The DNA binding domain recognizes and binds a 17-bp sequence (CENP-B box) in the centromeric alpha sat…	GO:0000775 (chromosome, centromeric region), GO:0000780 (condensed nuclear chromosome, centromeric region), GO:0005694 (chromosome), GO:0016604 (nuclear body), GO:0031618 (nuclear pericentric heterochromatin), GO:0003682 (chromatin binding), GO:0003696 (satellite DNA binding), GO:0019237 (centromeric DNA binding), GO:0043565 (sequence-specific DNA binding)			-0.335811	-0.394412		0.176226	0.268654	0.285344				362.647	84.8735	88.2709	0.622133	6.63345	50.0466	7.04227e-05	0.00207009	2.4008e-08	2.27654e-08	0.2	0.354767	0.00119868	0.866025	0.987579	0.0576689	0.0016586		76.3967	73.2761	109.799	117.196	118.582
ENSG00000174939	ASPHD1	PC	aspartate beta-hydroxylase domain containing 1		GO:0018193 (peptidyl-amino acid modification), GO:0055114 (oxidation-reduction process), GO:0016021 (integral component of membrane), GO:0051213 (dioxygenase activity)			-0.517436	-0.641403		0.312531	0.440346	0.405963				362.432	47.151	44.4804	1.09716	4.10997	50.0009	7.06643e-05	0.00207009	1.65605e-08	2.07087e-08	0.2	0.354767	0.000866411	0.866025	0.991206	0.0576689	0.000988685		10.6331	9.59293	20.4572	22.5376	21.9597
ENSG00000082153	BZW1	PC	basic leucine zipper and W2 domains 1		GO:0006351 (transcription, DNA-templated), GO:0006355 (regulation of transcription, DNA-templated), GO:0005737 (cytoplasm), GO:0016020 (membrane), GO:0003723 (RNA binding), GO:0045296 (cadherin binding)			0.411505	0.383065		-0.270564	-0.297931	-0.226075				362.377	69.5937	44.3356	-0.691651	5.45679	49.9894	7.07256e-05	0.00207009	3.4553e-08	3.76126e-08	0.2	0.354767	0.000334926	-0.866025	-0.997847	0.0576689	0.000119919		57.2108	56.055	34.9044	34.2109	36.0602
ENSG00000260260	SNHG19	lincRNA	small nucleolar RNA host gene 19					-0.552673	-0.62842		0.356568	0.289548	0.534978				362.06	49.8765	1.55026	1.10875	4.26544	49.9222	7.10834e-05	0.00207009	1.11281e-08	1.37852e-08	0.2	0.354767	0.00766453	0.866025	0.973407	0.0576689	0.00518488		11.5577	10.8643	23.4622	22.3064	26.814
ENSG00000272345	AL031775.1	antisense						0.904009	0.379536		-0.400211	-0.468273	-0.415061				362.003	61.0084	17.6065	-1.16659	4.92695	49.9101	7.11479e-05	0.00207009	8.56667e-10	9.24984e-10	0.2	0.354767	0.20734	-0.866025	-0.916043	0.0576689	0.0288317		53.7435	36.7536	20.5728	19.5326	20.3416
ENSG00000177182	CLVS1	PC	clavesin 1		GO:0006810 (transport), GO:0007040 (lysosome organization), GO:0005768 (endosome), GO:0005802 (trans-Golgi network), GO:0030136 (clathrin-coated vesicle), GO:0030669 (clathrin-coated endocytic vesicle membrane), GO:0031901 (early endosome membrane), GO:0032588 (trans-Golgi network membrane), GO:0005215 (transporter activity), GO:0080025 (phosphatidylinositol-3,5-bisphosphate binding), R-HSA-19999…			0.735686	0.78656		-0.762766	-0.357303	-0.402177				361.777	29.7334	63.2027	-1.56484	3.15372	49.8623	7.14044e-05	0.00207009	6.70506e-10	8.38823e-10	0.2	0.354767	0.00103803	-0.866025	-0.990079	0.0576689	0.00118442		14.1004	14.6783	3.69848	5.54772	5.31656
ENSG00000152240	HAUS1	PC	HAUS augmin like complex subunit 1	HAUS1 is 1 of 8 subunits of the 390-kD human augmin complex, or HAUS complex. The augmin complex was first identified in Drosophila, and its name comes from the Latin verb _augmentare,_ meaning _to increase._ The augmin complex is a microtubule-binding complex involved in microtubule generation within the mitotic spindle and is vital to mitotic spindle assembly (Goshima et al., 2008 [PubMed 18443…	GO:0000086 (G2/M transition of mitotic cell cycle), GO:0007067 (mitotic nuclear division), GO:0051225 (spindle assembly), GO:0051297 (centrosome organization), GO:0051301 (cell division), GO:0097711 (NA), GO:0000922 (spindle pole), GO:0005813 (centrosome), GO:0005829 (cytosol), GO:0005874 (microtubule), GO:0070652 (HAUS complex), GO:0003674 (molecular_function), GO:0005515 (protein binding), R-HS…			0.438063	0.270919		-0.244307	-0.202006	-0.262668				361.775	92.3431	9.97445	-0.599258	7.54121	49.8618	7.14067e-05	0.00207009	1.52902e-08	1.55708e-08	0.2	0.354767	0.102486	-0.866025	-0.974906	0.0576689	0.00475398		247.336	220.059	153.371	157.994	151.406
ENSG00000163754	GYG1	PC	glycogenin 1	This gene encodes a member of the glycogenin family. Glycogenin is a glycosyltransferase that catalyzes the formation of a short glucose polymer from uridine diphosphate glucose in an autoglucosylation reaction. This reaction is followed by elongation and branching of the polymer, catalyzed by glycogen synthase and branching enzyme, to form glycogen. This gene is expressed in muscle and other tis…	hsa00500 (Starch and sucrose metabolism), hsa01100 (Metabolic pathways), GO:0005978 (glycogen biosynthetic process), GO:0005980 (glycogen catabolic process), GO:0043312 (neutrophil degranulation), GO:0005576 (extracellular region), GO:0005829 (cytosol), GO:0016020 (membrane), GO:0034774 (secretory granule lumen), GO:0043202 (lysosomal lumen), GO:0070062 (extracellular vesicular exosome), GO:19048…			0.362267	0.551297		-0.344027	-0.145947	-0.42359				359.485	84.601	21.3799	-0.775014	6.60769	49.3777	7.40665e-05	0.00213632	1.97256e-09	2.02539e-09	0.2	0.354767	0.0516626	-0.866025	-0.96321	0.0576689	0.00842405		121.01	138.231	73.3917	84.4871	69.3465
ENSG00000168291	PDHB	PC	pyruvate dehydrogenase E1 beta subunit	The pyruvate dehydrogenase (PDH) complex is a nuclear-encoded mitochondrial multienzyme complex that catalyzes the overall conversion of pyruvate to acetyl-CoA and carbon dioxide, and provides the primary link between glycolysis and the tricarboxylic acid (TCA) cycle. The PDH complex is composed of multiple copies of three enzymatic components: pyruvate dehydrogenase (E1), dihydrolipoamide acetyl…	hsa00010 (Glycolysis / Gluconeogenesis), hsa00020 (Citrate cycle (TCA cycle)), hsa00620 (Pyruvate metabolism), hsa01100 (Metabolic pathways), hsa01200 (Carbon metabolism), hsa04066 (HIF-1 signaling pathway), hsa04922 (Glucagon signaling pathway), hsa05230 (Central carbon metabolism in cancer), GO:0006006 (glucose metabolic process), GO:0006086 (acetyl-CoA biosynthetic process from pyruvate), GO:0…			0.330307	0.368806		-0.19307	-0.29686	-0.209183				359.231	84.2347	55.6899	-0.593989	6.57518	49.3241	7.43683e-05	0.00213632	3.34254e-08	3.50037e-08	0.2	0.354767	0.000652954	-0.866025	-0.993759	0.0576689	0.000591343		117.658	120.894	81.2509	75.4721	80.3263
ENSG00000107263	RAPGEF1	PC	Rap guanine nucleotide exchange factor 1	This gene encodes a human guanine nucleotide exchange factor. It transduces signals from CRK by binding the SH3 domain of CRK, and activating several members of the Ras family of GTPases. This signaling cascade that may be involved in apoptosis, integrin-mediated signal transduction, and cell transformation. Several alternatively spliced transcript variants of this gene have been described, but t…	hsa04015 (Rap1 signaling pathway), hsa04510 (Focal adhesion), hsa04722 (Neurotrophin signaling pathway), hsa04910 (Insulin signaling pathway), hsa05211 (Renal cell carcinoma), GO:0000186 (activation of MAPKK activity), GO:0001568 (blood vessel development), GO:0007165 (signal transduction), GO:0007169 (transmembrane receptor protein tyrosine kinase signaling pathway), GO:0010976 (positive regulat…			-0.588614	-0.362394		0.422402	0.240834	0.287772				359.228	73.716	90.8092	0.82294	5.73993	49.3234	7.43722e-05	0.00213632	4.35163e-09	4.9185e-09	0.2	0.354767	0.0123466	0.866025	0.971179	0.0576689	0.00584804		33.4019	39.4119	69.3465	60.9093	62.9897
ENSG00000009307	CSDE1	PC	cold shock domain containing E1		GO:0006355 (regulation of transcription, DNA-templated), GO:0008584 (male gonad development), GO:0070966 (nuclear-transcribed mRNA catabolic process, no-go decay), GO:0005743 (mitochondrial inner membrane), GO:0005794 (Golgi apparatus), GO:0005829 (cytosol), GO:0005886 (plasma membrane), GO:0070937 (CRD-mediated mRNA stability complex), GO:0003677 (DNA binding), GO:0003723 (RNA binding), GO:00055…			0.322827	0.345216		-0.252776	-0.26	-0.155268				358.977	91.3636	72.9813	-0.562484	7.38159	49.2706	7.46712e-05	0.00213632	3.36523e-08	3.44658e-08	0.2	0.354767	0.000640703	-0.866025	-0.993241	0.0576689	0.000666391		204.919	208.155	136.844	136.15	146.552
ENSG00000152253	SPC25	PC	SPC25, NDC80 kinetochore complex component	This gene encodes a protein that may be involved in kinetochore-microtubule interaction and spindle checkpoint activity. [provided by RefSeq, Jul 2008].	GO:0007052 (mitotic spindle organization), GO:0007059 (chromosome segregation), GO:0007062 (sister chromatid cohesion), GO:0051301 (cell division), GO:0000777 (condensed chromosome kinetochore), GO:0005634 (nucleus), GO:0005829 (cytosol), GO:0031262 (Ndc80 complex), GO:0005515 (protein binding), R-HSA-162582 (Homo sapiens: Signal Transduction), R-HSA-1640170 (Homo sapiens: Cell Cycle), R-HSA-1943…			0.377825	0.555212		-0.327168	-0.313249	-0.29262				358.955	60.1056	13.7138	-0.83327	4.87106	49.266	7.46972e-05	0.00213632	2.71825e-08	2.9407e-08	0.2	0.354767	0.0917131	-0.866025	-0.982243	0.0576689	0.00283289		36.8692	41.9546	21.8441	22.0753	22.422
ENSG00000169908	TM4SF1	PC	transmembrane 4 L six family member 1	The protein encoded by this gene is a member of the transmembrane 4 superfamily, also known as the tetraspanin family. Most of these members are cell-surface proteins that are characterized by the presence of four hydrophobic domains. The proteins mediate signal transduction events that play a role in the regulation of cell development, activation, growth and motility. This encoded protein is a c…	GO:0008150 (biological_process), GO:0005887 (integral component of plasma membrane), GO:0003674 (molecular_function)			0.434956	0.45441		-0.359809	-0.23615	-0.293406				358.737	61.2299	60.6729	-0.788063	4.9433	49.22	7.49589e-05	0.00213632	3.33452e-08	3.60217e-08	0.2	0.354767	0.000304145	-0.866025	-0.996386	0.0576689	0.00026064		40.5677	41.1456	22.5376	24.7336	23.6934
ENSG00000063660	GPC1	PC	glypican 1	Cell surface heparan sulfate proteoglycans are composed of a membrane-associated protein core substituted with a variable number of heparan sulfate chains. Members of the glypican-related integral membrane proteoglycan family (GRIPS) contain a core protein anchored to the cytoplasmic membrane via a glycosyl phosphatidylinositol linkage. These proteins may play a role in the control of cell divisi…	hsa05205 (Proteoglycans in cancer), hsa05418 (Fluid shear stress and atherosclerosis), GO:0001523 (retinoid metabolic process), GO:0006024 (glycosaminoglycan biosynthetic process), GO:0006027 (glycosaminoglycan catabolic process), GO:0007411 (axon guidance), GO:0014037 (Schwann cell differentiation), GO:0030200 (heparan sulfate proteoglycan catabolic process), GO:0030203 (glycosaminoglycan metabo…			-0.422689	-0.377503		0.279331	0.296162	0.224699				358.688	71.6634	65.3578	0.697023	5.58945	49.2097	7.50176e-05	0.00213632	4.35126e-08	4.88425e-08	0.2	0.354767	0.000250118	0.866025	0.99541	0.0576689	0.000373051		34.3265	35.4823	57.0952	57.7887	54.8993
ENSG00000176170	SPHK1	PC	sphingosine kinase 1	The protein encoded by this gene catalyzes the phosphorylation of sphingosine to form sphingosine-1-phosphate (S1P), a lipid mediator with both intra- and extracellular functions. Intracellularly, S1P regulates proliferation and survival, and extracellularly, it is a ligand for cell surface G protein-coupled receptors. This protein, and its product S1P, play a key role in TNF-alpha signaling and …	hsa00600 (Sphingolipid metabolism), hsa01100 (Metabolic pathways), hsa04020 (Calcium signaling pathway), hsa04071 (Sphingolipid signaling pathway), hsa04072 (Phospholipase D signaling pathway), hsa04370 (VEGF signaling pathway), hsa04371 (Apelin signaling pathway), hsa04666 (Fc gamma R-mediated phagocytosis), hsa05152 (Tuberculosis), GO:0001568 (blood vessel development), GO:0003376 (sphingosine-…			-0.360321	-0.545241		0.169944	0.404879	0.330739				358.581	81.7392	52.4872	0.775411	6.34226	49.1871	7.51471e-05	0.00213632	3.77785e-09	3.47255e-09	0.2	0.354767	0.00705487	0.866025	0.96139	0.0576689	0.0090544		60.447	52.9345	88.1856	104.135	98.8187
ENSG00000167601	AXL	PC	AXL receptor tyrosine kinase	The protein encoded by this gene is a member of the Tyro3-Axl-Mer (TAM) receptor tyrosine kinase subfamily. The encoded protein possesses an extracellular domain which is composed of two immunoglobulin-like motifs at the N-terminal, followed by two fibronectin type-III motifs. It transduces signals from the extracellular matrix into the cytoplasm by binding to the vitamin K-dependent protein grow…	hsa01521 (EGFR tyrosine kinase inhibitor resistance), GO:0001764 (neuron migration), GO:0001779 (natural killer cell differentiation), GO:0001961 (positive regulation of cytokine-mediated signaling pathway), GO:0001974 (blood vessel remodeling), GO:0006909 (phagocytosis), GO:0006954 (inflammatory response), GO:0007165 (signal transduction), GO:0007283 (spermatogenesis), GO:0018108 (peptidyl-tyros…			0.270575	0.463519		-0.325592	-0.204251	-0.204251				358.305	98.1347	84.5997	-0.615755	9.29987	48.1709	8.12471e-05	0.00222016	1.40459e-08	1.39931e-08	0.138641	0.354767	0.101856	-0.888523	-0.964286	0.043925	0.00805839		742.701	849.263	490.626	533.852	533.852
ENSG00000147687	TATDN1	PC	TatD DNase domain containing 1		GO:0006308 (DNA catabolic process), GO:0090305 (nucleic acid phosphodiester bond hydrolysis), GO:0005654 (nucleoplasm), GO:0004536 (deoxyribonuclease activity), GO:0005515 (protein binding), GO:0016888 (endodeoxyribonuclease activity, producing 5'-phosphomonoesters), GO:0046872 (metal ion binding)			0.755425	0.437852		-0.547378	-0.448436	-0.197463				357.924	65.3011	14.2334	-1.05096	5.18155	49.0488	7.59432e-05	0.00214903	9.76662e-10	1.0434e-09	0.2	0.354767	0.108873	-0.866025	-0.949945	0.0576689	0.013342		58.251	46.3465	22.422	24.1557	29.1255
ENSG00000152082	MZT2B	PC	mitotic spindle organizing protein 2B		GO:0005654 (nucleoplasm), GO:0005813 (centrosome), GO:0005815 (microtubule organizing center), GO:0005819 (spindle), GO:0005829 (cytosol), GO:0008274 (gamma-tubulin ring complex), GO:0005515 (protein binding)			-0.477991	-0.313718		0.171047	0.274533	0.346128				357.907	91.1422	4.65928	0.667863	7.35678	49.0452	7.59639e-05	0.00214903	8.38059e-09	8.22646e-09	0.2	0.354767	0.00829501	0.866025	0.970533	0.0576689	0.00604518		113.959	127.944	179.838	193.361	203.301
ENSG00000169679	BUB1	PC	BUB1 mitotic checkpoint serine/threonine kinase	This gene encodes a serine/threonine-protein kinase that play a central role in mitosis. The encoded protein functions in part by phosphorylating members of the mitotic checkpoint complex and activating the spindle checkpoint. This protein also plays a role in inhibiting the activation of the anaphase promoting complex/cyclosome. This protein may also function in the DNA damage response. Mutation…	hsa04110 (Cell cycle), hsa04114 (Oocyte meiosis), hsa04914 (Progesterone-mediated oocyte maturation), GO:0006468 (protein phosphorylation), GO:0006915 (apoptotic process), GO:0007062 (sister chromatid cohesion), GO:0007063 (regulation of sister chromatid cohesion), GO:0007067 (mitotic nuclear division), GO:0007093 (mitotic cell cycle checkpoint), GO:0007094 (mitotic spindle assembly checkpoint), …			0.365055	0.841931		-0.549388	-0.363259	-0.294339				357.761	76.1519	60.1874	-1.05581	5.90874	49.0143	7.61433e-05	0.00214903	3.80194e-10	3.83232e-10	0.2	0.354767	0.191608	-0.866025	-0.918129	0.0576689	0.027773		72.3515	101.477	37.4471	42.8792	45.0752
ENSG00000185246	PRPF39	PC	pre-mRNA processing factor 39		GO:0000395 (mRNA 5'-splice site recognition), GO:0000243 (commitment complex), GO:0005685 (U1 snRNP), GO:0071004 (U2-type prespliceosome), GO:0030627 (pre-mRNA 5'-splice site binding)			0.591557	0.887633		-0.393735	-0.69172	-0.393735				357.723	29.8612	73.2964	-1.531	3.16492	48.0507	8.2008e-05	0.00222016	2.96757e-09	3.65119e-09	0.138641	0.354767	0.092517	-0.888523	-0.969094	0.043925	0.00649186		12.7135	16.0653	5.43214	4.04521	5.43214
ENSG00000048140	TSPAN17	PC	tetraspanin 17	This gene encodes a member of the transmembrane 4 superfamily. It is characterized by four tetraspanin transmembrane segments. The function of this gene has not yet been determined. [provided by RefSeq, Mar 2014].	GO:0007166 (cell surface receptor signaling pathway), GO:0016567 (protein ubiquitination), GO:0072594 (establishment of protein localization to organelle), GO:0000151 (ubiquitin ligase complex), GO:0005887 (integral component of plasma membrane), GO:0004842 (ubiquitin-protein transferase activity), GO:0019899 (enzyme binding)			-0.398426	-0.398426		0.341766	0.176321	0.278766				357.367	76.0327	73.6797	0.689862	5.89536	47.9773	8.2477e-05	0.00222101	3.52988e-08	3.91721e-08	0.138641	0.354767	0.00796309	0.888523	0.980441	0.043925	0.00327395		43.3415	43.3415	73.7384	65.5324	70.5022
ENSG00000281453	TGFB2-OT1	3prime_overlapping_ncRNA	TGFB2 overlapping transcript 1					0.410389	0.607435		-0.17547	-0.499037	-0.343317				357.299	72.1744	46.7802	-0.87971	5.62164	48.9172	7.67106e-05	0.00215985	2.17775e-09	2.27059e-09	0.2	0.354767	0.0483867	-0.866025	-0.96563	0.0576689	0.00760935		62.7585	72.2359	41.1456	32.4773	36.4069
ENSG00000212724	KRTAP2-3	PC	keratin associated protein 2-3		GO:0031424 (keratinization), GO:0005829 (cytosol), GO:0045095 (keratin filament), GO:0005515 (protein binding), R-HSA-1266738 (Homo sapiens: Developmental Biology), R-HSA-6805567 (Homo sapiens: Keratinization)			0.939307	0.37953		-0.406436	-0.42144	-0.490961				357.123	60.9914	16.9932	-1.20165	4.92585	48.8802	7.6928e-05	0.00216079	8.95125e-10	9.66344e-10	0.2	0.354767	0.215895	-0.866025	-0.909207	0.0576689	0.0323896		54.7837	36.5225	20.3416	20.1105	19.0703
ENSG00000257727	CNPY2	PC	canopy FGF signaling regulator 2		GO:0007167 (enzyme linked receptor protein signaling pathway), GO:0009888 (tissue development), GO:0010629 (negative regulation of gene expression), GO:0010988 (regulation of low-density lipoprotein particle clearance), GO:0045716 (positive regulation of low-density lipoprotein particle receptor biosynthetic process), GO:0005783 (endoplasmic reticulum), GO:0005887 (integral component of plasma me…			-0.53545	-0.426401		0.245174	0.349629	0.367048				356.621	60.029	10.3833	0.863015	4.86764	48.7748	7.75515e-05	0.00216939	2.9357e-08	3.4401e-08	0.2	0.354767	0.00122678	0.866025	0.988703	0.0576689	0.00143886		18.608	20.226	33.4019	36.0602	36.5225
ENSG00000264538	SUZ12P1	transcribed_u_Pg	SUZ12 pseudogene 1					0.998541	0.513672		-0.344326	-0.727589	-0.440298				356.58	48.9566	19.3612	-1.41702	4.20886	48.766	7.76035e-05	0.00216939	8.56799e-10	9.65619e-10	0.2	0.354767	0.165458	-0.866025	-0.932691	0.0576689	0.0207495		34.4421	24.0401	12.3668	9.01504	11.4422
ENSG00000137267	TUBB2A	PC	tubulin beta 2A class IIa		hsa04145 (Phagosome), hsa04540 (Gap junction), hsa05130 (Pathogenic Escherichia coli infection), GO:0007010 (cytoskeleton organization), GO:0007017 (microtubule-based process), GO:0005634 (nucleus), GO:0005737 (cytoplasm), GO:0005874 (microtubule), GO:0015630 (microtubule cytoskeleton), GO:0070062 (extracellular vesicular exosome), GO:1903561 (extracellular vesicle), GO:0003924 (GTPase activity),…			-0.605102	-0.570464		0.35667	0.38342	0.435476				355.659	40.5672	37.1039	1.15377	3.75235	48.5727	7.87644e-05	0.00219661	3.44236e-08	4.43287e-08	0.2	0.354767	0.000318733	0.866025	0.997217	0.0576689	0.000176131		7.51253	7.74369	16.5276	16.8743	17.5678
ENSG00000001036	FUCA2	PC	alpha-L-fucosidase 2	This gene encodes a plasma alpha-L-fucosidase, which represents 10-20% of the total cellular fucosidase activity. The protein is a member of the glycosyl hydrolase 29 family, and catalyzes the hydrolysis of the alpha-1,6-linked fucose joined to the reducing-end N-acetylglucosamine of the carbohydrate moieties of glycoproteins. This enzyme is essential for Helicobacter pylori adhesion to human gas…	hsa00511 (Other glycan degradation), GO:0006004 (fucose metabolic process), GO:0009617 (response to bacterium), GO:0016139 (glycoside catabolic process), GO:0043312 (neutrophil degranulation), GO:2000535 (regulation of entry of bacterium into host cell), GO:0005576 (extracellular region), GO:0005615 (extracellular space), GO:0035578 (azurophil granule lumen), GO:0070062 (extracellular vesicular e…			0.415456	0.479095		-0.193148	-0.31285	-0.388552				355.064	65.1307	39.506	-0.784538	5.16956	48.448	7.95247e-05	0.00221256	2.00926e-08	2.14911e-08	0.2	0.354767	0.00159289	-0.866025	-0.98902	0.0576689	0.00137883		46.6933	48.8892	29.9346	27.3918	25.8893
ENSG00000142694	EVA1B	PC	eva-1 homolog B		GO:0016021 (integral component of membrane), GO:0005515 (protein binding)			-0.534014	-0.339406		0.210069	0.320009	0.343342				354.334	75.0873	17.0528	0.753724	5.8271	48.295	8.04698e-05	0.00222016	1.17234e-08	1.31222e-08	0.2	0.354767	0.0162748	0.866025	0.97918	0.0576689	0.00359488		37.2159	42.8792	63.6832	68.8841	70.0399
ENSG00000180104	EXOC3	PC	exocyst complex component 3	The protein encoded by this gene is a component of the exocyst complex, a multiple protein complex essential for targeting exocytic vesicles to specific docking sites on the plasma membrane. Though best characterized in yeast, the component proteins and functions of exocyst complex have been demonstrated to be highly conserved in higher eukaryotes. At least eight components of the exocyst complex…	GO:0006887 (exocytosis), GO:0015031 (protein transport), GO:0051601 (exocyst localization), GO:0000145 (exocyst), GO:0005829 (cytosol), GO:0030667 (secretory granule membrane), GO:0000149 (SNARE binding), GO:0005515 (protein binding), GO:0045296 (cadherin binding), R-HSA-1445148 (Homo sapiens: Translocation of GLUT4 to the plasma membrane), R-HSA-1852241 (Homo sapiens: Organelle biogenesis and ma…			-0.564022	-0.334992		0.22208	0.340797	0.336138				354.158	75.0447	77.0613	0.774578	5.82533	48.2583	8.06991e-05	0.00222016	8.38194e-09	9.40196e-09	0.2	0.354767	0.0291169	0.866025	0.97849	0.0576689	0.00377462		36.2913	42.8792	64.0299	69.6932	69.462
ENSG00000135452	TSPAN31	PC	tetraspanin 31	The protein encoded by this gene is a member of the transmembrane 4 superfamily, also known as the tetraspanin family. Most of these members are cell-surface proteins that are characterized by the presence of four hydrophobic domains. The proteins mediate signal transduction events that play a role in the regulation of cell development, activation, growth and motility. This encoded protein is tho…	GO:0007166 (cell surface receptor signaling pathway), GO:0008284 (positive regulation of cell proliferation), GO:0005887 (integral component of plasma membrane), GO:0016020 (membrane)			-0.365304	-0.391413		0.284345	0.262982	0.20939				354.038	75.411	32.6405	0.65444	5.84925	48.2332	8.08557e-05	0.00222016	6.28952e-08	6.97122e-08	0.2	0.354767	0.000642771	0.866025	0.995101	0.0576689	0.000411301		43.1104	42.3013	68.7686	67.7284	65.1857
ENSG00000102158	MAGT1	PC	magnesium transporter 1	This gene encodes a magnesium cation transporter protein that localizes to the cell membrane. This protein also associates with N-oligosaccharyl transferase and therefore may have a role in N-glycosylation. Mutations in this gene cause mental retardation X-linked type 95 (MRX95). This gene may have multiple in-frame translation initiation sites, one of which would encode a shorter protein with an…	GO:0006487 (protein N-linked glycosylation), GO:0015693 (magnesium ion transport), GO:0018279 (protein N-linked glycosylation via asparagine), GO:0043312 (neutrophil degranulation), GO:0050890 (cognition), GO:0055085 (transmembrane transport), GO:1903830 (NA), GO:0005783 (endoplasmic reticulum), GO:0005886 (plasma membrane), GO:0005887 (integral component of plasma membrane), GO:0008250 (oligosac…			0.421213	1.0212		-0.624835	-0.494847	-0.322734				353.997	63.5721	84.7104	-1.30333	5.07676	48.2247	8.09091e-05	0.00222016	3.41326e-10	3.67662e-10	0.2	0.354767	0.213984	-0.866025	-0.904004	0.0576689	0.0351853		41.03	63.2208	18.8391	20.8039	23.6934
ENSG00000074266	EED	PC	embryonic ectoderm development	This gene encodes a member of the Polycomb-group (PcG) family. PcG family members form multimeric protein complexes, which are involved in maintaining the transcriptional repressive state of genes over successive cell generations. This protein interacts with enhancer of zeste 2, the cytoplasmic tail of integrin beta7, immunodeficiency virus type 1 (HIV-1) MA protein, and histone deacetylase prote…	GO:0000122 (negative regulation of transcription from RNA polymerase II promoter), GO:0006349 (regulation of gene expression by genetic imprinting), GO:0006351 (transcription, DNA-templated), GO:0016571 (histone methylation), GO:0021510 (spinal cord development), GO:0045814 (negative regulation of gene expression, epigenetic), GO:0045892 (negative regulation of transcription, DNA-templated), GO:0…			0.452845	0.903718		-0.637411	-0.391783	-0.327368				353.855	54.6631	56.0647	-1.24227	4.55652	48.195	8.10954e-05	0.00222016	1.54204e-09	1.69544e-09	0.2	0.354767	0.165663	-0.866025	-0.933407	0.0576689	0.0204216		29.819	41.4923	12.9447	15.7185	16.5276
ENSG00000115239	ASB3	PC	ankyrin repeat and SOCS box containing 3	This locus represents naturally occurring read-through transcription between the neighboring GPR75 (G protein-coupled receptor 75) and ASB3 (ankyrin repeat and SOCS box containing 3) on chromosome 2. The transcript includes exons from both GPR75 and ASB3 and translation initiates in the 5_ non-coding exon of GPR75. The resulting protein has a novel N-terminus but is otherwise identical to that en…	GO:0016567 (protein ubiquitination), GO:0035556 (intracellular signal transduction), GO:0000151 (ubiquitin ligase complex), GO:0005634 (nucleus), GO:0005737 (cytoplasm), GO:0004842 (ubiquitin-protein transferase activity), GO:0005515 (protein binding), GO:0031625 (ubiquitin protein ligase binding), R-HSA-1280218 (Homo sapiens: Adaptive Immune System), R-HSA-168256 (Homo sapiens: Immune System), R…			0.565266	0.833659		-0.531885	-0.638457	-0.228582				353.448	45.2943	36.7462	-1.31174	4.01209	48.1097	8.16331e-05	0.00222016	2.1517e-09	2.45262e-09	0.2	0.354767	0.068034	-0.866025	-0.965882	0.0576689	0.00752609		22.3064	27.2763	9.36177	8.55273	12.0201
ENSG00000049245	VAMP3	PC	vesicle associated membrane protein 3	Synaptobrevins/VAMPs, syntaxins, and the 25-kD synaptosomal-associated protein are the main components of a protein complex involved in the docking and/or fusion of synaptic vesicles with the presynaptic membrane. This gene is a member of the vesicle-associated membrane protein (VAMP)/synaptobrevin family. Because of its high homology to other known VAMPs, its broad tissue distribution, and its s…	hsa04130 (SNARE interactions in vesicular transport), hsa04145 (Phagosome), GO:0001921 (positive regulation of receptor recycling), GO:0002479 (antigen processing and presentation of exogenous peptide antigen via MHC class I, TAP-dependent), GO:0006461 (protein complex assembly), GO:0006887 (exocytosis), GO:0006904 (vesicle docking involved in exocytosis), GO:0006906 (vesicle fusion), GO:0016192 …			0.55443	0.270138		-0.288165	-0.323927	-0.212476				353.291	91.832	33.2964	-0.70111	7.46379	48.0769	8.18412e-05	0.00222016	5.44555e-09	5.51587e-09	0.2	0.354767	0.154102	-0.866025	-0.946055	0.0576689	0.014918		251.959	206.537	139.618	136.15	147.246
ENSG00000135842	FAM129A	PC	family with sequence similarity 129 member A		GO:0001933 (negative regulation of protein phosphorylation), GO:0001934 (positive regulation of protein phosphorylation), GO:0034976 (response to endoplasmic reticulum stress), GO:0045727 (positive regulation of translation), GO:0005737 (cytoplasm), GO:0005829 (cytosol), GO:0005886 (plasma membrane), GO:0016020 (membrane), GO:0070062 (extracellular vesicular exosome), GO:0003674 (molecular_functi…			0.497034	0.812411		-0.289844	-0.35385	-0.665752				353.217	53.9477	82.3083	-1.18884	4.51337	48.0615	8.19393e-05	0.00222016	1.87262e-09	2.06511e-09	0.2	0.354767	0.100835	-0.866025	-0.956222	0.0576689	0.0109231		30.1657	38.025	16.6431	15.8341	12.3668
ENSG00000177469	CAVIN1	PC	caveolae associated protein 1	This gene encodes a protein that enables the dissociation of paused ternary polymerase I transcription complexes from the 3_ end of pre-rRNA transcripts. This protein regulates rRNA transcription by promoting the dissociation of transcription complexes and the reinitiation of polymerase I on nascent rRNA transcripts. This protein also localizes to caveolae at the plasma membrane and is thought to…	GO:0006355 (regulation of transcription, DNA-templated), GO:0006361 (transcription initiation from RNA polymerase I promoter), GO:0006363 (termination of RNA polymerase I transcription), GO:0005634 (nucleus), GO:0005654 (nucleoplasm), GO:0005737 (cytoplasm), GO:0005739 (mitochondrion), GO:0005783 (endoplasmic reticulum), GO:0005829 (cytosol), GO:0005886 (plasma membrane), GO:0005901 (caveola), GO…			-0.266757	-0.394079		0.251057	0.211743	0.198036				353.181	99.0376	95.247	0.550529	10.0949	48.0539	8.19876e-05	0.00222016	5.22193e-08	5.38385e-08	0.2	0.354767	0.0368313	0.866025	0.989577	0.0576689	0.00127547		892.836	817.248	1279.21	1244.77	1232.98
ENSG00000064933	PMS1	PC	PMS1 homolog 1, mismatch repair system component	This gene encodes a protein belonging to the DNA mismatch repair mutL/hexB family. This protein is thought to be involved in the repair of DNA mismatches, and it can form heterodimers with MLH1, a known DNA mismatch repair protein. Mutations in this gene cause hereditary nonpolyposis colorectal cancer type 3 (HNPCC3) either alone or in combination with mutations in other genes involved in the HNP…	GO:0006298 (mismatch repair), GO:0042493 (response to drug), GO:0005634 (nucleus), GO:0032389 (MutLalpha complex), GO:0003677 (DNA binding), GO:0003697 (single-stranded DNA binding), GO:0005524 (ATP binding), GO:0016887 (ATPase activity), GO:0030983 (mismatched DNA binding)			0.706091	0.593912		-0.495594	-0.389278	-0.415132				353.121	24.9468	71.8654	-1.39667	2.88242	48.0414	8.20671e-05	0.00222016	1.24795e-08	1.58039e-08	0.2	0.354767	0.0344772	-0.866025	-0.994569	0.0576689	0.000480066		11.9045	10.8643	4.04521	4.50752	4.39194
ENSG00000122042	UBL3	PC	ubiquitin like 3		GO:0005622 (intracellular), GO:0005886 (plasma membrane), GO:0070062 (extracellular vesicular exosome)			0.394417	0.491398		-0.316032	-0.359229	-0.210553				352.93	63.4358	96.9847	-0.781296	5.06684	48.0017	8.23212e-05	0.00222101	3.30901e-08	3.55135e-08	0.2	0.354767	0.0175768	-0.866025	-0.988956	0.0576689	0.00139095		42.8792	45.9998	25.427	24.618	27.5074
ENSG00000197044	ZNF441	PC	zinc finger protein 441		GO:0006351 (transcription, DNA-templated), GO:0006355 (regulation of transcription, DNA-templated), GO:0005634 (nucleus), GO:0003677 (DNA binding), GO:0046872 (metal ion binding), R-HSA-212436 (Homo sapiens: Generic Transcription Pathway), R-HSA-74160 (Homo sapiens: Gene Expression)			0.84061	0.569215		-0.521191	-0.481989	-0.406644				352.266	14.0192	85.1789	-1.7355	2.25849	47.863	8.32147e-05	0.00223311	3.50068e-09	4.92799e-09	0.2	0.354767	0.10242	-0.866025	-0.976524	0.0576689	0.0043025		8.78388	6.93465	2.19597	2.31155	2.5427
ENSG00000170606	HSPA4	PC	heat shock protein family A (Hsp70) member 4		hsa04530 (Tight junction), hsa04612 (Antigen processing and presentation), GO:0006986 (response to unfolded protein), GO:0045040 (protein import into mitochondrial outer membrane), GO:0051131 (chaperone-mediated protein complex assembly), GO:0005829 (cytosol), GO:0070062 (extracellular vesicular exosome), GO:0005515 (protein binding), GO:0005524 (ATP binding), R-HSA-2262752 (Homo sapiens: Cellula…			0.403891	0.284724		-0.148444	-0.252853	-0.287317				352.164	97.4278	76.8228	-0.576289	8.85358	47.8416	8.33532e-05	0.00223311	2.71619e-08	2.71643e-08	0.2	0.354767	0.0406322	-0.866025	-0.978568	0.0576689	0.00375417		600.078	552.344	408.566	379.903	370.888
ENSG00000160124	CCDC58	PC	coiled-coil domain containing 58		GO:0005739 (mitochondrion)			1.06255	0.46636		-0.335607	-0.463714	-0.729591				352.058	59.7053	6.65247	-1.38975	4.85502	47.8196	8.34966e-05	0.00223311	3.68832e-10	4.01995e-10	0.2	0.354767	0.203619	-0.866025	-0.908522	0.0576689	0.0327535		55.3616	35.9446	19.7637	17.9145	14.5628
ENSG00000131408	NR1H2	PC	nuclear receptor subfamily 1 group H member 2	The liver X receptors, LXRA (NR1H3; MIM 602423) and LXRB, form a subfamily of the nuclear receptor superfamily and are key regulators of macrophage function, controlling transcriptional programs involved in lipid homeostasis and inflammation. The inducible LXRA is highly expressed in liver, adrenal gland, intestine, adipose tissue, macrophages, lung, and kidney, whereas LXRB is ubiquitously expre…	hsa04931 (Insulin resistance), GO:0000122 (negative regulation of transcription from RNA polymerase II promoter), GO:0006367 (transcription initiation from RNA polymerase II promoter), GO:0010745 (negative regulation of macrophage derived foam cell differentiation), GO:0010867 (positive regulation of triglyceride biosynthetic process), GO:0010875 (positive regulation of cholesterol efflux), GO:00…			-0.500583	-0.306733		0.268497	0.289337	0.249481				351.767	77.8128	39.5656	0.691602	6.04226	47.7589	8.38927e-05	0.00223789	2.19226e-08	2.42445e-08	0.2	0.354767	0.0636385	0.866025	0.988304	0.0576689	0.00151575		44.6129	51.3164	77.4369	78.5926	76.3967
ENSG00000086589	RBM22	PC	RNA binding motif protein 22	This gene encodes an RNA binding protein. The encoded protein may play a role in cell division and may be involved in pre-mRNA splicing. Related pseudogenes exist on chromosomes 6, 7, 9, 13, 16, 18, and X. [provided by RefSeq, Mar 2009].	hsa03040 (Spliceosome), GO:0000060 (protein import into nucleus, translocation), GO:0000387 (spliceosomal snRNP assembly), GO:0000398 (mRNA splicing, via spliceosome), GO:0033120 (positive regulation of RNA splicing), GO:0035690 (cellular response to drug), GO:0045292 (mRNA cis splicing, via spliceosome), GO:0090316 (positive regulation of intracellular protein transport), GO:0000974 (Prp19 compl…			0.430947	0.279991		-0.253359	-0.247148	-0.210431				351.58	84.388	34.4804	-0.606442	6.58633	47.7199	8.41487e-05	0.00223789	4.08358e-08	4.25966e-08	0.2	0.354767	0.09394	-0.866025	-0.979819	0.0576689	0.00343104		127.135	114.306	78.3615	78.7082	80.7886
ENSG00000107021	TBC1D13	PC	TBC1 domain family member 13		GO:0006886 (intracellular protein transport), GO:0031338 (regulation of vesicle fusion), GO:0090630 (NA), GO:0005622 (intracellular), GO:0005829 (cytosol), GO:0012505 (endomembrane system), GO:0016020 (membrane), GO:0005096 (GTPase activator activity), GO:0017137 (Rab GTPase binding), R-HSA-199991 (Homo sapiens: Membrane Trafficking), R-HSA-5653656 (Homo sapiens: Vesicle-mediated transport), R-HS…			-0.367374	-0.358296		0.193815	0.283539	0.248316				351.508	79.2522	77.5554	0.623547	6.14101	47.705	8.42472e-05	0.00223789	7.20938e-08	6.7203e-08	0.2	0.354767	0.00247983	0.866025	0.993119	0.0576689	0.000684557		52.9345	53.2812	79.055	84.2559	82.1755
ENSG00000132153	DHX30	PC	DExH-box helicase 30	DEAD box proteins, characterized by the conserved motif Asp-Glu-Ala-Asp (DEAD), are putative RNA helicases. They are implicated in a number of cellular processes involving alteration of RNA secondary structure such as translation initiation, nuclear and mitochondrial splicing, and ribosome and spliceosome assembly. Based on their distribution patterns, some members of this DEAD box protein family…	GO:0006396 (RNA processing), GO:1902775 (mitochondrial large ribosomal subunit assembly), GO:0005739 (mitochondrion), GO:0005829 (cytosol), GO:0035770 (ribonucleoprotein granule), GO:0042645 (mitochondrial nucleoid), GO:0003682 (chromatin binding), GO:0003723 (RNA binding), GO:0003725 (double-stranded RNA binding), GO:0004004 (ATP-dependent RNA helicase activity), GO:0005515 (protein binding), GO…			-0.460867	-0.301784		0.198562	0.259877	0.304212				350.761	83.894	75.0256	0.648612	6.54228	47.5494	8.52788e-05	0.00226018	2.62813e-08	2.48943e-08	0.2	0.354767	0.0202454	0.866025	0.983272	0.0576689	0.00259053		65.4168	73.2761	104.482	109.105	112.572
ENSG00000167635	ZNF146	PC	zinc finger protein 146		GO:0006355 (regulation of transcription, DNA-templated), GO:0005634 (nucleus), GO:0005730 (nucleolus), GO:0005829 (cytosol), GO:0003677 (DNA binding), GO:0003700 (sequence-specific DNA binding transcription factor activity), GO:0008201 (heparin binding), GO:0008270 (zinc ion binding)			0.39603	0.676159		-0.312516	-0.494177	-0.265497				350.562	60.7955	65.0937	-0.956699	4.91373	47.5079	8.55568e-05	0.00226244	7.79531e-09	8.39469e-09	0.2	0.354767	0.112521	-0.866025	-0.958757	0.0576689	0.00999199		37.9094	46.4621	22.422	19.5326	23.2311
ENSG00000119328	FAM206A	PC	family with sequence similarity 206 member A		GO:0016607 (nuclear speck), GO:0030425 (dendrite), GO:0005515 (protein binding)			0.517639	0.45017		-0.231671	-0.315305	-0.420833				350.081	56.9032	18.0494	-0.867129	4.68912	47.4079	8.62311e-05	0.00227128	3.62117e-08	3.94575e-08	0.2	0.354767	0.00207125	-0.866025	-0.991233	0.0576689	0.000984181		35.9446	34.2109	20.5728	19.3014	17.7989
ENSG00000146282	RARS2	PC	arginyl-tRNA synthetase 2, mitochondrial	The protein encoded by this gene is an arginyl-tRNA synthetase that is found in the mitochondrial matrix. Defects in this gene are a cause of pontocerebellar hypoplasia type 6 (PCH6). [provided by RefSeq, Oct 2008].	hsa00970 (Aminoacyl-tRNA biosynthesis), GO:0006418 (tRNA aminoacylation for protein translation), GO:0006420 (arginyl-tRNA aminoacylation), GO:0032543 (mitochondrial translation), GO:0005739 (mitochondrion), GO:0005759 (mitochondrial matrix), GO:0003723 (RNA binding), GO:0004814 (arginine-tRNA ligase activity), GO:0005524 (ATP binding), R-HSA-379724 (Homo sapiens: tRNA Aminoacylation), R-HSA-3797…			0.490821	0.313266		-0.285053	-0.218847	-0.300188				350.048	73.8523	16.3799	-0.697056	5.7474	47.401	8.62781e-05	0.00227128	3.22944e-08	3.44511e-08	0.2	0.354767	0.0954743	-0.866025	-0.97605	0.0576689	0.00443328		73.854	65.0701	42.3013	44.3817	41.839
ENSG00000068028	RASSF1	PC	Ras association domain family member 1	This gene encodes a protein similar to the RAS effector proteins. Loss or altered expression of this gene has been associated with the pathogenesis of a variety of cancers, which suggests the tumor suppressor function of this gene. The inactivation of this gene was found to be correlated with the hypermethylation of its CpG-island promoter region. The encoded protein was found to interact with DN…	hsa04014 (Ras signaling pathway), hsa04390 (Hippo signaling pathway), hsa04392 (Hippo signaling pathway - multiple species), hsa05200 (Pathways in cancer), hsa05206 (MicroRNAs in cancer), hsa05219 (Bladder cancer), hsa05223 (Non-small cell lung cancer), GO:0007050 (cell cycle arrest), GO:0007265 (Ras protein signal transduction), GO:0070507 (regulation of microtubule cytoskeleton organization), G…			-0.415677	-0.358339		0.287805	0.208705	0.277506				349.412	73.4179	64.1141	0.671577	5.72045	47.269	8.7179e-05	0.00227766	7.21025e-08	8.03034e-08	0.2	0.354767	0.000453871	0.866025	0.993429	0.0576689	0.000638849		37.9094	39.5275	62.9897	59.5224	62.5274
ENSG00000257411	AC034102.2	PC						0.288755	0.44979		-0.262701	-0.156324	-0.31952				349.362	92.7604	3.67973	-0.622251	7.62029	47.2584	8.72513e-05	0.00227766	1.82357e-08	1.84936e-08	0.2	0.354767	0.0679407	-0.866025	-0.97012	0.0576689	0.00617245		234.853	262.823	159.612	171.979	153.371
ENSG00000113593	PPWD1	PC	peptidylprolyl isomerase domain and WD repeat containing 1		GO:0000398 (mRNA splicing, via spliceosome), GO:0000413 (protein peptidyl-prolyl isomerization), GO:0006457 (protein folding), GO:0005654 (nucleoplasm), GO:0016604 (nuclear body), GO:0071013 (catalytic step 2 spliceosome), GO:0003755 (peptidyl-prolyl cis-trans isomerase activity), R-HSA-72163 (Homo sapiens: mRNA Splicing - Major Pathway), R-HSA-72172 (Homo sapiens: mRNA Splicing), R-HSA-72203 (Ho…			0.666089	0.30081		-0.281449	-0.368405	-0.317046				349.334	75.6665	34.54	-0.844634	5.86764	47.2528	8.72904e-05	0.00227766	5.05742e-09	5.24488e-09	0.2	0.354767	0.178537	-0.866025	-0.934935	0.0576689	0.0197273		89.4569	68.9997	45.4219	42.6481	44.2662
ENSG00000232677	LINC00665	lincRNA	long intergenic non-protein coding RNA 665					0.575017	0.445972		-0.407944	-0.189272	-0.423772				349.33	58.4959	57.879	-0.909697	4.7878	47.2519	8.72965e-05	0.00227766	1.59808e-08	1.73294e-08	0.2	0.354767	0.0165777	-0.866025	-0.980873	0.0576689	0.00316636		39.8742	36.2913	19.1859	22.6532	18.9547
ENSG00000182400	TRAPPC6B	PC	trafficking protein particle complex 6B	TRAPPC6B is a component of TRAPP complexes, which are tethering complexes involved in vesicle transport (Kummel et al., 2005 [PubMed 16025134]).[supplied by OMIM, Mar 2008].	GO:0006888 (ER to Golgi vesicle-mediated transport), GO:0043547 (positive regulation of GTPase activity), GO:0048208 (COPII vesicle coating), GO:0061024 (membrane organization), GO:0000139 (Golgi membrane), GO:0005783 (endoplasmic reticulum), GO:0005801 (cis-Golgi network), GO:0005802 (trans-Golgi network), GO:0005829 (cytosol), GO:0030008 (TRAPP complex), GO:0005515 (protein binding), GO:0017112…			0.534976	0.720272		-0.394035	-0.595727	-0.265487				348.752	44.5277	73.5945	-1.1796	3.97014	47.1318	8.81273e-05	0.00229424	8.27278e-09	9.41565e-09	0.2	0.354767	0.0380179	-0.866025	-0.978193	0.0576689	0.00385296		21.613	24.8491	10.402	8.78388	11.5577
ENSG00000156469	MTERF3	PC	mitochondrial transcription termination factor 3		GO:0006351 (transcription, DNA-templated), GO:0008380 (RNA splicing), GO:0016236 (macroautophagy), GO:0032502 (developmental process), GO:0042255 (ribosome assembly), GO:0045892 (negative regulation of transcription, DNA-templated), GO:0005654 (nucleoplasm), GO:0005739 (mitochondrion), GO:0005741 (mitochondrial outer membrane), GO:0003690 (double-stranded DNA binding), GO:0003727 (single-stranded…			0.410417	0.636462		-0.510339	-0.308048	-0.228492				347.732	62.7119	27.2487	-0.925463	5.02955	46.9204	8.96136e-05	0.00232777	8.00329e-09	8.5805e-09	0.2	0.354767	0.0735653	-0.866025	-0.965374	0.0576689	0.00769423		41.6079	49.0048	21.0351	24.5024	26.0049
ENSG00000164037	SLC9B1	PC	solute carrier family 9 member B1	The protein encoded by this gene is a sodium/hydrogen exchanger and transmembrane protein. Highly conserved orthologs of this gene have been found in other mammalian species. The expression of this gene may be limited to testis. Multiple transcript variants encoding different isoforms have been found for this gene. [provided by RefSeq, Jul 2010].	GO:0030317 (sperm motility), GO:0034220 (ion transmembrane transport), GO:0035725 (sodium ion transmembrane transport), GO:0051453 (regulation of intracellular pH), GO:1902600 (hydrogen ion transmembrane transport), GO:0005739 (mitochondrion), GO:0005886 (plasma membrane), GO:0016021 (integral component of membrane), GO:0097228 (sperm principal piece), GO:0015385 (sodium:proton antiporter activit…			-0.516536	-0.598759		0.334097	0.326691	0.454507				347.423	46.8444	24.7274	1.05783	4.08856	46.8564	9.00701e-05	0.00233447	5.24133e-08	6.50186e-08	0.2	0.354767	0.00100743	0.866025	0.989945	0.0576689	0.00120844		10.5175	9.82408	20.5728	20.4572	22.5376
ENSG00000112183	RBM24	PC	RNA binding motif protein 24		GO:0010830 (regulation of myotube differentiation), GO:0030154 (cell differentiation), GO:0043488 (regulation of mRNA stability), GO:0005654 (nucleoplasm), GO:0005829 (cytosol), GO:0003730 (mRNA 3'-UTR binding)			0.401469	0.642577		-0.189644	-0.359379	-0.495024				346.629	66.4083	51.0903	-0.915258	5.25238	46.6922	9.12533e-05	0.00235992	5.92439e-09	6.29353e-09	0.2	0.354767	0.0792983	-0.866025	-0.960404	0.0576689	0.00940191		48.1958	57.3264	31.3215	27.623	24.9647
ENSG00000170515	PA2G4	PC	proliferation-associated 2G4	This gene encodes an RNA-binding protein that is involved in growth regulation. This protein is present in pre-ribosomal ribonucleoprotein complexes and may be involved in ribosome assembly and the regulation of intermediate and late steps of rRNA processing. This protein can interact with the cytoplasmic domain of the ErbB3 receptor and may contribute to transducing growth regulatory signals. Th…	GO:0006351 (transcription, DNA-templated), GO:0006364 (rRNA processing), GO:0006417 (regulation of translation), GO:0007050 (cell cycle arrest), GO:0008283 (cell proliferation), GO:0043066 (negative regulation of apoptotic process), GO:0043312 (neutrophil degranulation), GO:0045597 (positive regulation of cell differentiation), GO:0045892 (negative regulation of transcription, DNA-templated), GO:…			0.421157	0.284362		-0.197208	-0.295473	-0.212837				346.327	86.594	20.8603	-0.599301	6.79802	46.6297	9.17087e-05	0.00236209	4.68422e-08	4.85097e-08	0.2	0.354767	0.0692978	-0.866025	-0.97968	0.0576689	0.00346662		146.205	132.798	94.5423	88.1856	93.5021
ENSG00000096872	IFT74	PC	intraflagellar transport 74		GO:0003334 (keratinocyte development), GO:0007219 (Notch signaling pathway), GO:0007368 (determination of left/right symmetry), GO:0007507 (heart development), GO:0033630 (positive regulation of cell adhesion mediated by integrin), GO:0035735 (intraciliary transport involved in cilium morphogenesis), GO:0045944 (positive regulation of transcription from RNA polymerase II promoter), GO:0050680 (ne…			0.55749	0.844101		-0.513694	-0.565873	-0.322024				346.307	28.0896	33.799	-1.47253	3.06086	46.6255	9.17394e-05	0.00236209	8.87588e-09	1.09576e-08	0.2	0.354767	0.0974639	-0.866025	-0.970548	0.0576689	0.0060406		11.6733	14.6783	4.50752	4.27636	5.43214
ENSG00000143183	TMCO1	PC	transmembrane and coiled-coil domains 1	This locus encodes a transmembrane protein. Mutations at this locus have been associated with craniofacial dysmorphism, skeletal anomalies, and mental retardation. Mutations at this locus have also been associated with open angle glaucoma blindness. Alternatively spliced transcript variants have been described. [provided by RefSeq, Jan 2012].	GO:0006983 (ER overload response), GO:0032469 (endoplasmic reticulum calcium ion homeostasis), GO:0070588 (calcium ion transmembrane transport), GO:0000139 (Golgi membrane), GO:0005783 (endoplasmic reticulum), GO:0030176 (integral component of endoplasmic reticulum membrane), GO:0005262 (calcium channel activity)			0.264457	0.484872		-0.213169	-0.237998	-0.298162				346.036	88.9192	56.8739	-0.637344	7.07725	46.5695	9.21499e-05	0.00236746	2.29122e-08	2.34672e-08	0.2	0.354767	0.128991	-0.866025	-0.960998	0.0576689	0.00919179		158.341	184.808	113.15	111.185	106.562
ENSG00000087302	RTRAF	PC	RNA transcription, translation and transport factor		GO:0006351 (transcription, DNA-templated), GO:0006388 (tRNA splicing, via endonucleolytic cleavage and ligation), GO:0016032 (viral process), GO:0045944 (positive regulation of transcription from RNA polymerase II promoter), GO:0050658 (RNA transport), GO:0005634 (nucleus), GO:0005654 (nucleoplasm), GO:0005737 (cytoplasm), GO:0005815 (microtubule organizing center), GO:0005829 (cytosol), GO:00484…			0.582906	0.251665		-0.300975	-0.297039	-0.236558				345.694	96.7039	58.3731	-0.708357	8.55058	46.4989	9.26708e-05	0.00237353	6.66573e-09	6.66229e-09	0.2	0.354767	0.18121	-0.866025	-0.933117	0.0576689	0.0205541		544.485	432.375	294.145	294.954	307.667
ENSG00000198901	PRC1	PC	protein regulator of cytokinesis 1	This gene encodes a protein that is involved in cytokinesis. The protein is present at high levels during the S and G2/M phases of mitosis but its levels drop dramatically when the cell exits mitosis and enters the G1 phase. It is located in the nucleus during interphase, becomes associated with mitotic spindles in a highly dynamic manner during mitosis, and localizes to the cell mid-body during …	GO:0000022 (mitotic spindle elongation), GO:0000910 (cytokinesis), GO:0001578 (microtubule bundle formation), GO:0008284 (positive regulation of cell proliferation), GO:0000922 (spindle pole), GO:0005634 (nucleus), GO:0005654 (nucleoplasm), GO:0005819 (spindle), GO:0005829 (cytosol), GO:0005876 (spindle microtubule), GO:0005886 (plasma membrane), GO:0015630 (microtubule cytoskeleton), GO:0030496 …			0.30546	0.562419		-0.278335	-0.202497	-0.387047				345.586	80.632	27.2913	-0.745825	6.25019	46.4765	9.28365e-05	0.00237353	9.83899e-09	1.02123e-08	0.2	0.354767	0.123079	-0.866025	-0.95356	0.0576689	0.0119297		91.075	109.221	60.1003	63.452	55.5927
ENSG00000162736	NCSTN	PC	nicastrin	This gene encodes a type I transmembrane glycoprotein that is an integral component of the multimeric gamma-secretase complex. The encoded protein cleaves integral membrane proteins, including Notch receptors and beta-amyloid precursor protein, and may be a stabilizing cofactor required for gamma-secretase complex assembly. The cleavage of beta-amyloid precursor protein yields amyloid beta peptid…	hsa04330 (Notch signaling pathway), hsa05010 (Alzheimer disease), GO:0002262 (myeloid cell homeostasis), GO:0006508 (proteolysis), GO:0006509 (membrane protein ectodomain proteolysis), GO:0007219 (Notch signaling pathway), GO:0007220 (Notch receptor processing), GO:0016485 (protein processing), GO:0031293 (membrane protein intracellular domain proteolysis), GO:0034205 (beta-amyloid formation), GO…			0.360326	0.28885		-0.211157	-0.232033	-0.205985				345.482	86.6792	27.3424	-0.550861	6.80669	46.4552	9.29948e-05	0.00237353	1.12175e-07	1.16601e-07	0.2	0.354767	0.0456193	-0.866025	-0.99446	0.0576689	0.000494642		141.467	134.532	94.5423	93.1554	94.8891
ENSG00000111802	TDP2	PC	tyrosyl-DNA phosphodiesterase 2	This gene encodes a member of a superfamily of divalent cation-dependent phosphodiesterases. The encoded protein associates with CD40, tumor necrosis factor (TNF) receptor-75 and TNF receptor associated factors (TRAFs), and inhibits nuclear factor-kappa-B activation. This protein has sequence and structural similarities with APE1 endonuclease, which is involved in both DNA repair and the activati…	GO:0006302 (double-strand break repair), GO:0007166 (cell surface receptor signaling pathway), GO:0048666 (neuron development), GO:0090305 (nucleic acid phosphodiester bond hydrolysis), GO:1903507 (negative regulation of nucleic acid-templated transcription), GO:0005634 (nucleus), GO:0005654 (nucleoplasm), GO:0005730 (nucleolus), GO:0005737 (cytoplasm), GO:0016235 (aggresome), GO:0016604 (nuclear…			0.383379	0.805914		-0.469675	-0.333303	-0.386315				345.352	55.2593	40.7836	-1.09037	4.58876	46.4284	9.31945e-05	0.00237353	9.08698e-09	9.9101e-09	0.2	0.354767	0.176832	-0.866025	-0.935117	0.0576689	0.0196452		29.5878	40.3365	15.4874	17.221	16.5276
[truncated: 11,281 more rows]
