# Supplementary material for: Effects of Siberian fir terpenes extract Abisil on antioxidant activity, autophagy, transcriptome and proteome of human fibroblasts
Source: Aging (Albany NY). 2021 Aug 24;13(16):20050–80. doi: 10.18632/aging.203448 (PMC8436938; doi:10.18632/aging.203448)
Supplement: Supplementary Table 2 [file aging-13-203448-s003.xlsx]

## Sheet: Hi vs Cnt
	Supplementary Table 2. The results of differential gene expression analysis between samples treated with high-concentration Abisil (50 µg/ml) and control non-treated samples.
Gene ID	Gene	Bio type	Name	RefSeq_Summary	Annotation		Control			50 μg/ml				Cnt	Hi	Score	LogCPM rank (%)	Tr.Length rank (%)	LogFC	LogCPM	F	p (QLF test)	FDR (QLF test)	p (LR test)	p (ex. test)	p (Mann-Wh.)	FDR (Mann-Wh.)	p (t-test)	Spear- man r	Pearson r	p (Spearman)	p (Pearson)	CPMs:	control_1	control_2	50mkg_1	50mkg_2	50mkg_3
Hi vs Cnt							0	0		1	1	1																						0	0	1	1	1
Abysil overview							0	0		2	2	2																						0	0	2	2	2
ENSG00000225630	MTND2P28	u_Pg	mitochondrially encoded NADH:ubiquinone oxidoreductase core subunit 2 pseudogene 28				1.22098	1.55167		-1.0853	-0.740384	-0.946968				1214.76	97.3419	26.1462	-2.32625	8.80728	310.718	7.52805e-09	8.94934e-05	6.71841e-55	4.44345e-55	0.2	0.464103	0.0862511	-0.866025	-0.982674	0.0576689	0.00273066		763.11	960.211	152.691	194.469	168.257
ENSG00000228253	MT-ATP8	PC	mitochondrially encoded ATP synthase membrane subunit 8		hsa00190 (Oxidative phosphorylation), hsa01100 (Metabolic pathways), hsa04714 (Thermogenesis), hsa05010 (Alzheimer disease), hsa05012 (Parkinson disease), hsa05016 (Huntington disease), R-HSA-1428517 (Homo sapiens: The citric acid (TCA) cycle and respiratory electron transport), R-HSA-1430728 (Homo sapiens: Metabolism), R-HSA-163200 (Homo sapiens: Respiratory electron transport, ATP synthesis by …		2.06253	1.28726		-0.943951	-1.31087	-1.09496				934.916	96.6437	0.959031	-2.85846	8.52092	204.56	5.63476e-08	0.000202215	2.06415e-41	1.64809e-41	0.2	0.464103	0.188093	-0.866025	-0.930115	0.0576689	0.0219433		960.554	560.4	117.78	90.8818	105.876
ENSG00000131238	PPT1	PC	palmitoyl-protein thioesterase 1	The protein encoded by this gene is a small glycoprotein involved in the catabolism of lipid-modified proteins during lysosomal degradation. The encoded enzyme removes thioester-linked fatty acyl groups such as palmitate from cysteine residues. Defects in this gene are a cause of infantile neuronal ceroid lipofuscinosis 1 (CLN1, or INCL) and neuronal ceroid lipofuscinosis 4 (CLN4). Two transcript…	hsa00062 (Fatty acid elongation), hsa01100 (Metabolic pathways), hsa01212 (Fatty acid metabolism), hsa04142 (Lysosome), GO:0002084 (protein depalmitoylation), GO:0006898 (receptor-mediated endocytosis), GO:0006907 (pinocytosis), GO:0007042 (lysosomal lumen acidification), GO:0007269 (neurotransmitter secretion), GO:0007399 (nervous system development), GO:0007420 (brain development), GO:0007601 (…		1.09776	0.822308		-0.731417	-0.529641	-0.659013				906.108	90.6292	26.6594	-1.62705	7.26116	194.673	7.13775e-08	0.000202215	6.28288e-33	4.57716e-33	0.2	0.464103	0.0843277	-0.866025	-0.982676	0.0576689	0.00273008		282.489	233.042	78.0622	90.0806	82.1828
ENSG00000147400	CETN2	PC	centrin 2	Caltractin belongs to a family of calcium-binding proteins and is a structural component of the centrosome. The high level of conservation from algae to humans and its association with the centrosome suggested that caltractin plays a fundamental role in the structure and function of the microtubule-organizing center, possibly required for the proper duplication and segregation of the centrosome. …	hsa03420 (Nucleotide excision repair), GO:0000086 (G2/M transition of mitotic cell cycle), GO:0000715 (nucleotide-excision repair, DNA damage recognition), GO:0000717 (nucleotide-excision repair, DNA duplex unwinding), GO:0006289 (nucleotide-excision repair), GO:0006294 (nucleotide-excision repair, preincision complex assembly), GO:0007067 (mitotic nuclear division), GO:0007099 (centriole replica…		1.09693	0.997144		-0.883346	-0.571751	-0.638975				905.528	78.0871	36.5778	-1.79991	6.03128	194.476	7.17226e-08	0.000202215	8.21159e-33	9.45364e-33	0.2	0.464103	0.00743278	-0.866025	-0.996138	0.0576689	0.000287928		117.895	109.882	28.3863	35.7117	33.9948
ENSG00000104408	EIF3E	PC	eukaryotic translation initiation factor 3 subunit E		hsa03013 (RNA transport), hsa05160 (Hepatitis C), GO:0000184 (nuclear-transcribed mRNA catabolic process, nonsense-mediated decay), GO:0006413 (translational initiation), GO:0006446 (regulation of translational initiation), GO:0045727 (positive regulation of translation), GO:0045947 (negative regulation of translational initiation), GO:1902416 (positive regulation of mRNA binding), GO:0000785 (ch…		0.712609	0.869167		-0.458736	-0.552826	-0.570215				876.927	94.465	14.8229	-1.33056	7.94867	184.861	9.13093e-08	0.000202215	2.44191e-29	2.18857e-29	0.2	0.464103	0.0506558	-0.866025	-0.992608	0.0576689	0.000762069		365.473	407.595	161.161	150.859	149.028
ENSG00000139350	NEDD1	PC	neural precursor cell expressed, developmentally down-regulated 1		GO:0000086 (G2/M transition of mitotic cell cycle), GO:0007067 (mitotic nuclear division), GO:0051301 (cell division), GO:0071539 (protein localization to centrosome), GO:0097711 (NA), GO:0000242 (pericentriolar material), GO:0000922 (spindle pole), GO:0005813 (centrosome), GO:0005814 (centriole), GO:0005829 (cytosol), GO:0036064 (ciliary basal body), GO:0045177 (apical part of cell), GO:0005515 …		1.08926	1.33636		-0.96622	-0.838127	-0.621274				833.567	62.4159	56.0444	-2.17426	5.00014	170.661	1.3344e-07	0.000202215	4.51566e-29	5.69357e-29	0.2	0.464103	0.062281	-0.866025	-0.98816	0.0576689	0.00154379		54.3688	64.8992	11.5605	12.8196	15.2233
ENSG00000168288	MMADHC	PC	methylmalonic aciduria and homocystinuria, cblD type	This gene encodes a mitochondrial protein that is involved in an early step of vitamin B12 metabolism. Vitamin B12 (cobalamin) is essential for normal development and survival in humans. Mutations in this gene cause methylmalonic aciduria and homocystinuria type cblD (MMADHC), a disorder of cobalamin metabolism that is characterized by decreased levels of the coenzymes adenosylcobalamin and methy…	GO:0009108 (coenzyme biosynthetic process), GO:0009235 (cobalamin metabolic process), GO:0005737 (cytoplasm), GO:0005739 (mitochondrion), GO:0005829 (cytosol), GO:0005515 (protein binding), R-HSA-1430728 (Homo sapiens: Metabolism), R-HSA-1643685 (Homo sapiens: Disease), R-HSA-196741 (Homo sapiens: Cobalamin (Cbl, vitamin B12) transport and metabolism), R-HSA-196849 (Homo sapiens: Metabolism of wa…		0.722684	0.965302		-0.543212	-0.571105	-0.573668				832.142	86.0868	38.4369	-1.43984	6.73059	170.202	1.35154e-07	0.000202215	1.64521e-27	1.27687e-27	0.2	0.464103	0.0848091	-0.866025	-0.985237	0.0576689	0.00214843		156.124	185.083	63.7546	62.4956	62.3811
ENSG00000166848	TERF2IP	PC	TERF2 interacting protein	The gene encodes a protein that is part of a complex involved in telomere length regulation. Pseudogenes are present on chromosomes 5 and 22. [provided by RefSeq, Apr 2010]. Publication Note: This RefSeq record includes a subset of the publications that are available for this gene. Please see the Gene record to access additional publications.	GO:0000723 (telomere maintenance), GO:0001933 (negative regulation of protein phosphorylation), GO:0006351 (transcription, DNA-templated), GO:0006355 (regulation of transcription, DNA-templated), GO:0007004 (telomere maintenance via telomerase), GO:0010569 (regulation of double-strand break repair via homologous recombination), GO:0010833 (telomere maintenance via telomere lengthening), GO:001623…		1.06265	0.757371		-0.587219	-0.619678	-0.613128				831.38	83.0585	44.4435	-1.5625	6.44468	169.957	1.3608e-07	0.000202215	4.93137e-28	3.41739e-28	0.2	0.464103	0.101825	-0.866025	-0.978902	0.0576689	0.00366716		159.444	128.654	49.447	48.3024	48.5313
ENSG00000161202	DVL3	PC	dishevelled segment polarity protein 3	This gene is a member of a multi-gene family which shares strong similarity with the Drosophila dishevelled gene, dsh. The Drosophila dishevelled gene encodes a cytoplasmic phosphoprotein that regulates cell proliferation. [provided by RefSeq, Jul 2008]. Publication Note: This RefSeq record includes a subset of the publications that are available for this gene. Please see the Gene record to acces…	hsa04150 (mTOR signaling pathway), hsa04310 (Wnt signaling pathway), hsa04330 (Notch signaling pathway), hsa04390 (Hippo signaling pathway), hsa04550 (Signaling pathways regulating pluripotency of stem cells), hsa04916 (Melanogenesis), hsa04934 (Cushing syndrome), hsa05165 (Human papillomavirus infection), hsa05200 (Pathways in cancer), hsa05217 (Basal cell carcinoma), hsa05224 (Breast cancer), h…		0.836935	0.91318		-0.634331	-0.608097	-0.507686				808.463	73.8223	59.8974	-1.51671	5.73215	162.649	1.67533e-07	0.000221293	2.00402e-25	2.25789e-25	0.2	0.464103	0.0125836	-0.866025	-0.997969	0.0576689	0.000109807		84.472	89.1649	29.1875	29.7598	32.049
ENSG00000128708	HAT1	PC	histone acetyltransferase 1	The protein encoded by this gene is a type B histone acetyltransferase (HAT) that is involved in the rapid acetylation of newly synthesized cytoplasmic histones, which are in turn imported into the nucleus for de novo deposition onto nascent DNA chains. Histone acetylation, particularly of histone H4, plays an important role in replication-dependent chromatin assembly. Specifically, this HAT can …	hsa05034 (Alcoholism), GO:0006323 (DNA packaging), GO:0006335 (DNA replication-dependent nucleosome assembly), GO:0006336 (DNA replication-independent nucleosome assembly), GO:0006348 (chromatin silencing at telomere), GO:0006475 (internal protein amino acid acetylation), GO:0007584 (response to nutrient), GO:0043967 (histone H4 acetylation), GO:0000784 (nuclear chromosome, telomeric region), GO:…		1.18774	0.744536		-0.618924	-0.627162	-0.686187				788.739	89.7712	76.8571	-1.6518	7.16271	156.463	2.01189e-07	0.000239173	6.32606e-28	5.03613e-28	0.2	0.464103	0.140829	-0.866025	-0.960073	0.0576689	0.00951962		279.284	204.885	78.4056	77.9478	74.7429
ENSG00000117133	RPF1	PC	ribosome production factor 1 homolog		GO:0000027 (ribosomal large subunit assembly), GO:0000460 (maturation of 5.8S rRNA), GO:0000470 (maturation of LSU-rRNA), GO:0005730 (nucleolus), GO:0030687 (preribosome, large subunit precursor), GO:0003723 (RNA binding), GO:0005515 (protein binding), GO:0042134 (rRNA primary transcript binding)		0.798096	0.711831		-0.440845	-0.47377	-0.595312				765.196	85.8345	26.794	-1.2824	6.70296	149.206	2.51627e-07	0.000262472	5.39494e-24	4.67091e-24	0.2	0.464103	0.0123439	-0.866025	-0.996486	0.0576689	0.000249943		165.625	155.896	69.0198	67.4174	61.8088
ENSG00000127125	PPCS	PC	phosphopantothenoylcysteine synthetase	Biosynthesis of coenzyme A (CoA) from pantothenic acid (vitamin B5) is an essential universal pathway in prokaryotes and eukaryotes. PPCS (EC 6.3.2.5), one of the last enzymes in this pathway, converts phosphopantothenate to phosphopantothenoylcysteine (Daugherty et al., 2002 [PubMed 11923312]).[supplied by OMIM, Mar 2008].	hsa00770 (Pantothenate and CoA biosynthesis), hsa01100 (Metabolic pathways), GO:0009108 (coenzyme biosynthetic process), GO:0015937 (coenzyme A biosynthetic process), GO:0005829 (cytosol), GO:0070062 (extracellular vesicular exosome), GO:0004632 (phosphopantothenate--cysteine ligase activity), R-HSA-1430728 (Homo sapiens: Metabolism), R-HSA-196783 (Homo sapiens: Coenzyme A biosynthesis), R-HSA-19…		0.961409	0.89301		-0.761821	-0.454021	-0.638576				750.47	73.0569	22.8569	-1.60601	5.67059	144.736	2.9029e-07	0.000262472	1.90798e-24	2.15903e-24	0.2	0.464103	0.000780522	-0.866025	-0.996248	0.0576689	0.000275693		86.9902	82.8696	24.9524	31.3622	27.3561
ENSG00000132646	PCNA	PC	proliferating cell nuclear antigen	The protein encoded by this gene is found in the nucleus and is a cofactor of DNA polymerase delta. The encoded protein acts as a homotrimer and helps increase the processivity of leading strand synthesis during DNA replication. In response to DNA damage, this protein is ubiquitinated and is involved in the RAD6-dependent DNA repair pathway. Two transcript variants encoding the same protein have …	hsa03030 (DNA replication), hsa03410 (Base excision repair), hsa03420 (Nucleotide excision repair), hsa03430 (Mismatch repair), hsa04110 (Cell cycle), hsa04530 (Tight junction), hsa05161 (Hepatitis B), GO:0000082 (G1/S transition of mitotic cell cycle), GO:0000083 (regulation of transcription involved in G1/S transition of mitotic cell cycle), GO:0000722 (telomere maintenance via recombination), …		0.629744	0.683562		-0.515024	-0.415503	-0.382778				748.426	97.7877	45.0745	-1.09779	9.04185	144.12	2.96164e-07	0.000262472	1.1173e-22	1.09937e-22	0.2	0.464103	0.00207295	-0.866025	-0.997537	0.0576689	0.00014666		759.905	788.863	342.581	367.19	375.66
ENSG00000095261	PSMD5	PC	proteasome 26S subunit, non-ATPase 5	The 26S proteasome is a multicatalytic proteinase complex with a highly ordered structure composed of 2 complexes, a 20S core and a 19S regulator. The 20S core is composed of 4 rings of 28 non-identical subunits; 2 rings are composed of 7 alpha subunits and 2 rings are composed of 7 beta subunits. The 19S regulator is composed of a base, which contains 6 ATPase subunits and 2 non-ATPase subunits,…	GO:0000165 (MAPK cascade), GO:0000209 (protein polyubiquitination), GO:0002223 (stimulatory C-type lectin receptor signaling pathway), GO:0002479 (antigen processing and presentation of exogenous peptide antigen via MHC class I, TAP-dependent), GO:0006521 (regulation of cellular amino acid metabolic process), GO:0010972 (negative regulation of G2/M transition of mitotic cell cycle), GO:0016579 (p…		1.06249	0.930613		-0.815673	-0.617577	-0.559852				744.078	63.5515	21.9904	-1.76866	5.07554	142.813	3.09103e-07	0.000262472	1.38951e-23	1.64353e-23	0.2	0.464103	0.0237643	-0.866025	-0.994835	0.0576689	0.000445219		60.8931	55.399	15.1088	17.627	18.4282
ENSG00000109606	DHX15	PC	DEAH-box helicase 15	The protein encoded by this gene is a putative ATP-dependent RNA helicase implicated in pre-mRNA splicing. [provided by RefSeq, Jul 2008].	hsa03040 (Spliceosome), GO:0000398 (mRNA splicing, via spliceosome), GO:0006397 (mRNA processing), GO:0008380 (RNA splicing), GO:0009636 (response to toxic substance), GO:0043279 (response to alkaloid), GO:0005634 (nucleus), GO:0005654 (nucleoplasm), GO:0005689 (U12-type spliceosomal complex), GO:0005730 (nucleolus), GO:0005737 (cytoplasm), GO:0016607 (nuclear speck), GO:0071008 (U2-type post-mRN…		0.793369	0.75517		-0.687652	-0.463899	-0.396988				716.579	89.4095	44.4772	-1.30467	7.1075	134.655	4.07123e-07	0.000322659	4.07368e-23	3.6767e-23	0.2	0.464103	0.000309532	-0.866025	-0.995349	0.0576689	0.000380548		217.018	211.295	76.4598	89.6228	93.9723
ENSG00000116752	BCAS2	PC	BCAS2, pre-mRNA processing factor		hsa03040 (Spliceosome), GO:0000375 (RNA splicing, via transesterification reactions), GO:0000398 (mRNA splicing, via spliceosome), GO:0008380 (RNA splicing), GO:0000974 (Prp19 complex), GO:0005654 (nucleoplasm), GO:0005662 (DNA replication factor A complex), GO:0005681 (spliceosomal complex), GO:0005730 (nucleolus), GO:0005813 (centrosome), GO:0016607 (nuclear speck), GO:0071011 (precatalytic spl…		0.80212	0.794698		-0.698111	-0.407062	-0.491645				680.465	79.0966	29.4776	-1.36562	6.1161	124.233	5.92735e-07	0.00041629	3.13317e-21	2.62116e-21	0.2	0.464103	0.00135266	-0.866025	-0.996216	0.0576689	0.000279315		109.539	108.967	37.4287	46.2421	43.4951
ENSG00000131051	RBM39	PC	RNA binding motif protein 39	This gene encodes a member of the U2AF65 family of proteins. The encoded protein is found in the nucleus, where it co-localizes with core spliceosomal proteins. It has been shown to play a role in both steroid hormone receptor-mediated transcription and alternative splicing, and it is also a transcriptional coregulator of the viral oncoprotein v-Rel. Multiple transcript variants have been observe…	GO:0006351 (transcription, DNA-templated), GO:0006355 (regulation of transcription, DNA-templated), GO:0006396 (RNA processing), GO:0006397 (mRNA processing), GO:0008380 (RNA splicing), GO:0005654 (nucleoplasm), GO:0005815 (microtubule organizing center), GO:0015630 (microtubule cytoskeleton), GO:0016607 (nuclear speck), GO:0003723 (RNA binding), GO:0005515 (protein binding)		0.771849	0.869866		-0.772638	-0.481931	-0.387146				680.059	91.4956	40.5064	-1.37689	7.38369	124.117	5.95301e-07	0.00041629	1.67167e-22	1.53658e-22	0.2	0.464103	0.00236302	-0.866025	-0.991377	0.0576689	0.000959911		255.247	273.332	86.1889	105.876	113.202
ENSG00000174748	RPL15	PC	ribosomal protein L15	Ribosomes, the organelles that catalyze protein synthesis, consist of a small 40S subunit and a large 60S subunit. Together these subunits are composed of 4 RNA species and approximately 80 structurally distinct proteins. This gene encodes a ribosomal protein that is a component of the 60S subunit. The protein belongs to the L15E family of ribosomal proteins. It is located in the cytoplasm. This …	hsa03010 (Ribosome), GO:0000184 (nuclear-transcribed mRNA catabolic process, nonsense-mediated decay), GO:0002181 (cytoplasmic translation), GO:0006364 (rRNA processing), GO:0006412 (translation), GO:0006413 (translational initiation), GO:0006614 (SRP-dependent cotranslational protein targeting to membrane), GO:0019083 (viral transcription), GO:0045471 (response to ethanol), GO:0005634 (nucleus),…		0.753272	0.592185		-0.549014	-0.337211	-0.459232				665.155	96.2904	55.1443	-1.12756	8.40421	119.914	6.98593e-07	0.000461382	3.10405e-20	3.04694e-20	0.2	0.464103	0.0422888	-0.866025	-0.988025	0.0576689	0.00157024		529.953	473.753	213.698	247.807	227.548
ENSG00000136104	RNASEH2B	PC	ribonuclease H2 subunit B	RNase H2 is composed of a single catalytic subunit (A) and two non-catalytic subunits (B and C) and specifically degrades the RNA of RNA:DNA hybrids. The protein encoded by this gene is the non-catalytic B subunit of RNase H2, which is thought to play a role in DNA replication. Multiple transcript variants encoding different isoforms have been found for this gene. Defects in this gene are a cause…	hsa03030 (DNA replication), GO:0001701 (in utero embryonic development), GO:0006401 (RNA catabolic process), GO:0009259 (ribonucleotide metabolic process), GO:0010389 (regulation of G2/M transition of mitotic cell cycle), GO:0010629 (negative regulation of gene expression), GO:0048146 (positive regulation of fibroblast proliferation), GO:0090502 (RNA phosphodiester bond hydrolysis, endonucleolyti…		0.871553	0.809322		-0.675968	-0.555064	-0.449843				654.713	66.5713	43.2658	-1.47611	5.25576	117.003	7.8287e-07	0.000489829	2.7706e-19	3.12815e-19	0.2	0.464103	0.00115653	-0.866025	-0.997103	0.0576689	0.000187061		63.0679	60.3208	20.2595	22.2054	24.0368
ENSG00000233966	UBE2SP1	p_Pg	ubiquitin conjugating enzyme E2 S pseudogene 1				0.907191	0.689047		-0.548179	-0.51203	-0.536029				641.968	69.0444	8.63969	-1.40077	5.40118	113.489	9.01491e-07	0.000492251	2.08989e-18	2.3229e-18	0.2	0.464103	0.0788112	-0.866025	-0.98716	0.0576689	0.00174317		72.2247	61.8088	25.0669	25.7537	25.2958
ENSG00000169764	UGP2	PC	UDP-glucose pyrophosphorylase 2	The enzyme encoded by this gene is an important intermediary in mammalian carbohydrate interconversions. It transfers a glucose moiety from glucose-1-phosphate to MgUTP and forms UDP-glucose and MgPPi. In liver and muscle tissue, UDP-glucose is a direct precursor of glycogen; in lactating mammary gland it is converted to UDP-galactose which is then converted to lactose. The eukaryotic enzyme has …	hsa00040 (Pentose and glucuronate interconversions), hsa00052 (Galactose metabolism), hsa00500 (Starch and sucrose metabolism), hsa00520 (Amino sugar and nucleotide sugar metabolism), hsa01100 (Metabolic pathways), GO:0005977 (glycogen metabolic process), GO:0005978 (glycogen biosynthetic process), GO:0006011 (UDP-glucose metabolic process), GO:0006065 (UDP-glucuronate biosynthetic process), GO:0…		0.743092	0.887743		-0.543999	-0.631269	-0.455568				640.933	67.362	22.3353	-1.43188	5.30421	113.205	9.11973e-07	0.000492251	1.46357e-18	1.63911e-18	0.2	0.464103	0.0385257	-0.866025	-0.993193	0.0576689	0.000673423		59.863	66.3872	23.35	21.862	24.9524
ENSG00000189057	FAM111B	PC	family with sequence similarity 111 member B	This gene encodes a protein with a trypsin-like cysteine/serine peptidase domain in the C-terminus. Mutations in this gene are associated with an autosomal dominant form of hereditary fibrosing poikiloderma (HFP). Affected individuals display mottled pigmentation, telangiectasia, epidermal atrophy, tendon contractures, and progressive pulmonary fibrosis. Alternative splicing results in multiple t…	GO:0005515 (protein binding)		0.664345	0.685772		-0.393691	-0.538563	-0.417864				639.798	80.9472	79.7258	-1.1538	6.2536	112.894	9.23624e-07	0.000492251	2.2915e-18	2.15625e-18	0.2	0.464103	8.68343e-05	-0.866025	-0.998163	0.0576689	9.45012e-05		112.744	114.461	53.1098	47.8446	52.1941
ENSG00000080824	HSP90AA1	PC	heat shock protein 90 alpha family class A member 1	The protein encoded by this gene is an inducible molecular chaperone that functions as a homodimer. The encoded protein aids in the proper folding of specific target proteins by use of an ATPase activity that is modulated by co-chaperones. Two transcript variants encoding different isoforms have been found for this gene. [provided by RefSeq, Jan 2012].	hsa04141 (Protein processing in endoplasmic reticulum), hsa04151 (PI3K-Akt signaling pathway), hsa04217 (Necroptosis), hsa04612 (Antigen processing and presentation), hsa04621 (NOD-like receptor signaling pathway), hsa04657 (IL-17 signaling pathway), hsa04659 (Th17 cell differentiation), hsa04914 (Progesterone-mediated oocyte maturation), hsa04915 (Estrogen signaling pathway), hsa05200 (Pathways …		0.637234	0.727005		-0.349873	-0.393989	-0.620378				637.064	99.5121	39.3287	-1.13417	10.7048	112.148	9.5237e-07	0.000492251	7.76771e-19	7.76737e-19	0.2	0.464103	0.00307643	-0.866025	-0.991774	0.0576689	0.000894579		2401.27	2555.56	1210.42	1173.91	1003.13
ENSG00000116030	SUMO1	PC	small ubiquitin-like modifier 1	This gene encodes a protein that is a member of the SUMO (small ubiquitin-like modifier) protein family. It functions in a manner similar to ubiquitin in that it is bound to target proteins as part of a post-translational modification system. However, unlike ubiquitin which targets proteins for degradation, this protein is involved in a variety of cellular processes, such as nuclear transport, tr…	hsa03013 (RNA transport), hsa05418 (Fluid shear stress and atherosclerosis), GO:0000122 (negative regulation of transcription from RNA polymerase II promoter), GO:0006281 (DNA repair), GO:0006303 (double-strand break repair via nonhomologous end joining), GO:0016032 (viral process), GO:0016925 (protein sumoylation), GO:0030578 (PML body organization), GO:0031334 (positive regulation of protein co…		0.506499	0.619895		-0.364242	-0.393134	-0.369017				598.448	92.4378	16.4886	-0.949805	7.54075	101.804	1.48623e-06	0.000707291	1.86985e-16	1.86654e-16	0.2	0.464103	0.0506999	-0.866025	-0.994324	0.0576689	0.000512935		251.356	272.073	136.552	133.805	136.094
ENSG00000187109	NAP1L1	PC	nucleosome assembly protein 1 like 1	This gene encodes a member of the nucleosome assembly protein (NAP) family. This protein participates in DNA replication and may play a role in modulating chromatin formation and contribute to the regulation of cell proliferation. Alternative splicing of this gene results in several transcript variants; however, not all have been fully described. [provided by RefSeq, Jul 2008].	GO:0006260 (DNA replication), GO:0006334 (nucleosome assembly), GO:0008284 (positive regulation of cell proliferation), GO:0005634 (nucleus), GO:0016020 (membrane), GO:0042470 (melanosome), GO:0003723 (RNA binding), GO:0005515 (protein binding)		0.738037	0.491008		-0.373005	-0.472992	-0.383048				598.381	97.754	65.6684	-1.03275	9.02901	101.787	1.48741e-06	0.000707291	2.46144e-17	2.44682e-17	0.2	0.464103	0.101257	-0.866025	-0.976386	0.0576689	0.00434057		817.707	688.71	377.491	352.081	374.859
ENSG00000112996	MRPS30	PC	mitochondrial ribosomal protein S30	Mammalian mitochondrial ribosomal proteins are encoded by nuclear genes and help in protein synthesis within the mitochondrion. Mitochondrial ribosomes (mitoribosomes) consist of a small 28S subunit and a large 39S subunit. They have an estimated 75% protein to rRNA composition compared to prokaryotic ribosomes, where this ratio is reversed. Another difference between mammalian mitoribosomes and …	GO:0006915 (apoptotic process), GO:0070125 (mitochondrial translational elongation), GO:0070126 (mitochondrial translational termination), GO:0005743 (mitochondrial inner membrane), GO:0005840 (ribosome), GO:0003723 (RNA binding), GO:0003735 (structural constituent of ribosome), R-HSA-1852241 (Homo sapiens: Organelle biogenesis and maintenance), R-HSA-5368286 (Homo sapiens: Mitochondrial translat…		0.683744	1.01447		-0.578435	-0.610062	-0.509713				586.568	63.7113	67.149	-1.51416	5.08238	98.7007	1.71244e-06	0.000755602	8.83433e-17	9.95799e-17	0.2	0.464103	0.113225	-0.866025	-0.973166	0.0576689	0.00525534		48.6458	61.6943	19.1149	18.6571	20.1451
ENSG00000172239	PAIP1	PC	poly(A) binding protein interacting protein 1	The protein encoded by this gene interacts with poly(A)-binding protein and with the cap-binding complex eIF4A. It is involved in translational initiation and protein biosynthesis. Overexpression of this gene in COS7 cells stimulates translation. Alternative splicing occurs at this locus and three transcript variants encoding three distinct isoforms have been identified. [provided by RefSeq, Jul …	hsa03013 (RNA transport), GO:0000289 (nuclear-transcribed mRNA poly(A) tail shortening), GO:0006413 (translational initiation), GO:0045727 (positive regulation of translation), GO:0048255 (mRNA stabilization), GO:0005737 (cytoplasm), GO:0005829 (cytosol), GO:0003723 (RNA binding), GO:0005515 (protein binding), GO:0008494 (translation activator activity), R-HSA-429914 (Homo sapiens: Deadenylation-…		0.878502	0.565932		-0.571905	-0.439142	-0.433388				586.389	82.3435	41.4486	-1.24073	6.37834	98.6544	1.71612e-06	0.000755602	2.2737e-17	2.12968e-17	0.2	0.464103	0.115091	-0.866025	-0.969952	0.0576689	0.00622419		140.787	112.973	50.2483	55.2845	55.5135
ENSG00000205302	SNX2	PC	sorting nexin 2	This gene belongs to the sorting nexin family whose members contain the phosphoinositide-binding phox (PX) domain. The encoded protein is a component of the retromer complex which plays a role in protein sorting in the endocytic pathway. This protein may form oligomeric complexes with other family members. Alternate splicing results in multiple transcript variants of this gene. Pseudogenes associ…	hsa04144 (Endocytosis), GO:0006886 (intracellular protein transport), GO:0006897 (endocytosis), GO:0016050 (vesicle organization), GO:0034498 (early endosome to Golgi transport), GO:0042147 (retrograde transport, endosome to Golgi), GO:0051259 (protein oligomerization), GO:0072673 (lamellipodium morphogenesis), GO:0005737 (cytoplasm), GO:0005764 (lysosome), GO:0005768 (endosome), GO:0005829 (cyto…		0.668783	0.544471		-0.396083	-0.374807	-0.442365				578.121	82.638	19.4414	-1.03626	6.40001	96.5167	1.89665e-06	0.000805262	8.42653e-16	8.33789e-16	0.2	0.464103	0.0490214	-0.866025	-0.993528	0.0576689	0.000624457		126.937	116.292	59.634	60.5497	57.6882
ENSG00000237973	MTCO1P12	u_Pg	mitochondrially encoded cytochrome c oxidase I pseudogene 12				-1.85588	-1.21255		0.839857	0.988357	1.24021				568.911	42.3368	55.4303	3.33849	3.84562	94.1568	2.12311e-06	0.000870328	2.9344e-21	6.22153e-21	0.2	0.464103	0.00418134	0.866025	0.974563	0.0576689	0.00485139		1.25907	3.09044	19.1149	21.4042	25.8681
ENSG00000198695	MT-ND6	PC	mitochondrially encoded NADH:ubiquinone oxidoreductase core subunit 6		hsa00190 (Oxidative phosphorylation), hsa01100 (Metabolic pathways), hsa04714 (Thermogenesis), hsa04723 (Retrograde endocannabinoid signaling), hsa05012 (Parkinson disease), R-HSA-1428517 (Homo sapiens: The citric acid (TCA) cycle and respiratory electron transport), R-HSA-1430728 (Homo sapiens: Metabolism), R-HSA-163200 (Homo sapiens: Respiratory electron transport, ATP synthesis by chemiosmotic…		0.689689	0.55623		-0.290086	-0.401022	-0.554811				561.415	99.6383	4.40818	-1.03675	11.021	92.2528	2.32981e-06	0.000914632	1.23934e-15	1.23711e-15	0.2	0.464103	0.019414	-0.866025	-0.987158	0.0576689	0.00174355		3139.43	2861.86	1590.89	1473	1323.85
ENSG00000114209	PDCD10	PC	programmed cell death 10	This gene encodes an evolutionarily conserved protein associated with cell apoptosis. The protein interacts with the serine/threonine protein kinase MST4 to modulate the extracellular signal-regulated kinase (ERK) pathway. It also interacts with and is phosphoryated by serine/threonine kinase 25, and is thought to function in a signaling pathway essential for vascular developent. Mutations in thi…	GO:0001525 (angiogenesis), GO:0008284 (positive regulation of cell proliferation), GO:0010628 (positive regulation of gene expression), GO:0010629 (negative regulation of gene expression), GO:0030335 (positive regulation of cell migration), GO:0032874 (positive regulation of stress-activated MAPK cascade), GO:0033138 (positive regulation of peptidyl-serine phosphorylation), GO:0036481 (intrinsic …		0.547434	0.935836		-0.546225	-0.460114	-0.47693				559.288	80.0808	15.6894	-1.28404	6.19034	91.7152	2.39249e-06	0.000914632	1.78182e-16	1.66019e-16	0.2	0.464103	0.143548	-0.866025	-0.957902	0.0576689	0.0103032		97.2916	127.967	44.5252	47.3867	46.8144
ENSG00000183527	PSMG1	PC	proteasome assembly chaperone 1		GO:0021930 (cerebellar granule cell precursor proliferation), GO:0043248 (proteasome assembly), GO:0080129 (proteasome core complex assembly), GO:0005634 (nucleus), GO:0005654 (nucleoplasm), GO:0005737 (cytoplasm), GO:0005783 (endoplasmic reticulum), GO:0005794 (Golgi apparatus), GO:0005829 (cytosol), GO:0005515 (protein binding), GO:0070628 (proteasome binding)		0.541647	0.509051		-0.356906	-0.323165	-0.370627				557.001	91.0582	29.7468	-0.8864	7.32455	91.1385	2.462e-06	0.000914632	1.02543e-14	1.0345e-14	0.2	0.464103	0.00387644	-0.866025	-0.999142	0.0576689	3.01501e-05		223.427	218.391	118.925	121.786	117.78
ENSG00000183291	SELENOF	PC	selenoprotein F	This gene encodes a selenoprotein, which contains a selenocysteine (Sec) residue at its active site. The selenocysteine is encoded by the UGA codon that normally signals translation termination. The 3_ UTR of selenoprotein genes have a common stem-loop structure, the sec insertion sequence (SECIS), that is necessary for the recognition of UGA as a Sec codon rather than as a stop signal. Studies i…	GO:0051084 ('de novo' posttranslational protein folding), GO:0005788 (endoplasmic reticulum lumen), GO:0070062 (extracellular vesicular exosome)		0.512751	1.00441		-0.554292	-0.464041	-0.498826				548.77	91.033	31.0255	-1.30133	7.32166	89.0748	2.7314e-06	0.000983965	5.22202e-17	5.05455e-17	0.2	0.464103	0.176893	-0.866025	-0.937663	0.0576689	0.0185074		206.029	290.501	97.2916	103.701	101.183
ENSG00000181061	HIGD1A	PC	HIG1 hypoxia inducible domain family member 1A		GO:0043066 (negative regulation of apoptotic process), GO:0055114 (oxidation-reduction process), GO:0061418 (regulation of transcription from RNA polymerase II promoter in response to hypoxia), GO:0005654 (nucleoplasm), GO:0005739 (mitochondrion), GO:0005743 (mitochondrial inner membrane), GO:0016021 (integral component of membrane), GO:0043234 (protein complex), GO:0070469 (respiratory chain), R…		0.617687	0.926387		-0.506565	-0.367688	-0.669821				542.208	76.0178	23.5551	-1.33542	5.87967	87.4423	2.96987e-06	0.00100683	4.87649e-16	4.45755e-16	0.2	0.464103	0.0992671	-0.866025	-0.969966	0.0576689	0.00621992		81.9539	101.985	36.513	40.4046	32.3924
ENSG00000136536	MARCH7	PC	membrane associated ring-CH-type finger 7	MARCH7 is a member of the MARCH family of membrane-bound E3 ubiquitin ligases (EC 6.3.2.19). MARCH proteins add ubiquitin (see MIM 191339) to target lysines in substrate proteins, thereby signaling their vesicular transport between membrane compartments (Bartee et al., 2004 [PubMed 14722266]).[supplied by OMIM, Mar 2010].	GO:0002643 (regulation of tolerance induction), GO:0016567 (protein ubiquitination), GO:0042130 (negative regulation of T cell proliferation), GO:0008270 (zinc ion binding), GO:0016740 (transferase activity)		0.666925	0.726713		-0.604911	-0.409062	-0.379665				540.073	70.8614	70.2869	-1.20971	5.53185	86.9137	3.0524e-06	0.00100683	7.2296e-15	7.82922e-15	0.2	0.464103	0.00060356	-0.866025	-0.995094	0.0576689	0.000412156		68.3331	71.309	27.1272	31.3622	32.049
ENSG00000174021	GNG5	PC	G protein subunit gamma 5	G proteins are trimeric (alpha-beta-gamma) membrane-associated proteins that regulate flow of information from cell surface receptors to a variety of internal metabolic effectors. Interaction of a G protein with its activated receptor promotes exchange of GTP for GDP that is bound to the alpha subunit. The alpha-GTP complex dissociates from the beta-gamma heterodimer so that the subunits, in turn…	hsa04014 (Ras signaling pathway), hsa04062 (Chemokine signaling pathway), hsa04151 (PI3K-Akt signaling pathway), hsa04371 (Apelin signaling pathway), hsa04713 (Circadian entrainment), hsa04723 (Retrograde endocannabinoid signaling), hsa04724 (Glutamatergic synapse), hsa04725 (Cholinergic synapse), hsa04726 (Serotonergic synapse), hsa04727 (GABAergic synapse), hsa04728 (Dopaminergic synapse), hsa0…		0.514467	0.781973		-0.582674	-0.402806	-0.31096				538.342	96.4586	11.4579	-1.0884	8.4608	86.486	3.12119e-06	0.00100683	7.34679e-16	7.30305e-16	0.2	0.464103	0.0906455	-0.866025	-0.969903	0.0576689	0.00623936		468.259	564.062	217.819	247.006	263.374
ENSG00000116044	NFE2L2	PC	nuclear factor, erythroid 2 like 2	This gene encodes a transcription factor which is a member of a small family of basic leucine zipper (bZIP) proteins. The encoded transcription factor regulates genes which contain antioxidant response elements (ARE) in their promoters; many of these genes encode proteins involved in response to injury and inflammation which includes the production of free radicals. Multiple transcript variants e…	hsa04141 (Protein processing in endoplasmic reticulum), hsa05200 (Pathways in cancer), hsa05225 (Hepatocellular carcinoma), hsa05418 (Fluid shear stress and atherosclerosis), GO:0006366 (transcription from RNA polymerase II promoter), GO:0006954 (inflammatory response), GO:0007568 (aging), GO:0010499 (proteasomal ubiquitin-independent protein catabolic process), GO:0010628 (positive regulation of…		0.640786	0.890929		-0.366064	-0.557565	-0.608086				536.068	68.607	45.4362	-1.34239	5.37516	85.9253	3.21422e-06	0.00100683	3.58939e-15	3.92958e-15	0.2	0.464103	0.0777349	-0.866025	-0.979274	0.0576689	0.00357074		59.0617	70.6223	28.3863	24.6091	23.6934
ENSG00000136999	NOV	PC	nephroblastoma overexpressed	The protein encoded by this gene is a small secreted cysteine-rich protein and a member of the CCN family of regulatory proteins. CNN family proteins associate with the extracellular matrix and play an important role in cardiovascular and skeletal development, fibrosis and cancer development. [provided by RefSeq, Feb 2009]. Publication Note: This RefSeq record includes a subset of the publication…	GO:0001525 (angiogenesis), GO:0002062 (chondrocyte differentiation), GO:0010468 (regulation of gene expression), GO:0010761 (fibroblast migration), GO:0010832 (negative regulation of myotube differentiation), GO:0014909 (smooth muscle cell migration), GO:0030308 (negative regulation of cell growth), GO:0033627 (cell adhesion mediated by integrin), GO:0035767 (endothelial cell chemotaxis), GO:0042…		0.695458	0.851737		-0.592362	-0.348007	-0.606827				534.569	65.4946	54.8498	-1.36036	5.18943	85.5565	3.27723e-06	0.00100683	5.01718e-15	5.54692e-15	0.2	0.464103	0.0276086	-0.866025	-0.988869	0.0576689	0.0014073		54.0255	60.4353	20.9463	25.1814	20.7174
ENSG00000091164	TXNL1	PC	thioredoxin like 1		GO:0034599 (cellular response to oxidative stress), GO:0045454 (cell redox homeostasis), GO:0055114 (oxidation-reduction process), GO:0098869 (NA), GO:0000502 (proteasome complex), GO:0005634 (nucleus), GO:0005737 (cytoplasm), GO:0005829 (cytosol), GO:0070062 (extracellular vesicular exosome), GO:0004791 (thioredoxin-disulfide reductase activity), GO:0015035 (protein disulfide oxidoreductase acti…		0.521873	0.675477		-0.334995	-0.513313	-0.349042				533.964	86.5242	65.3235	-1.01599	6.76865	85.408	3.30302e-06	0.00100683	8.48381e-15	8.44956e-15	0.2	0.464103	0.0425868	-0.866025	-0.986994	0.0576689	0.0017771		147.769	164.595	80.6948	71.0801	79.8936
ENSG00000213443	AC007068.1	p_Pg					1.23371	0.873489		-1.00242	-0.428265	-0.67651				531.728	60.0101	15.0416	-1.8873	4.85249	84.8594	3.40043e-06	0.00101061	1.26271e-16	1.47657e-16	0.2	0.464103	0.0924604	-0.866025	-0.969635	0.0576689	0.00632276		57.5737	44.4108	10.6448	16.8257	13.8497
ENSG00000168906	MAT2A	PC	methionine adenosyltransferase 2A	The protein encoded by this gene catalyzes the production of S-adenosylmethionine (AdoMet) from methionine and ATP. AdoMet is the key methyl donor in cellular processes. [provided by RefSeq, Jun 2011]. Sequence Note: This RefSeq record was created from transcript and genomic sequence data to make the sequence consistent with the reference genome assembly. The genomic coordinates used for the tran…	hsa00270 (Cysteine and methionine metabolism), hsa01100 (Metabolic pathways), hsa01230 (Biosynthesis of amino acids), GO:0006556 (S-adenosylmethionine biosynthetic process), GO:0006730 (one-carbon metabolic process), GO:0032259 (methylation), GO:0034214 (protein hexamerization), GO:0051291 (protein heterooligomerization), GO:0005829 (cytosol), GO:0048269 (methionine adenosyltransferase complex), …		0.512356	0.588155		-0.423671	-0.317154	-0.359685				528.231	85.498	44.2584	-0.934978	6.66474	84.0039	3.55929e-06	0.00102521	5.63801e-14	5.7018e-14	0.2	0.464103	0.0148953	-0.866025	-0.995978	0.0576689	0.000306011		138.04	145.594	71.1946	76.8031	74.5139
ENSG00000136156	ITM2B	PC	integral membrane protein 2B	Amyloid precursor proteins are processed by beta-secretase and gamma-secretase to produce beta-amyloid peptides which form the characteristic plaques of Alzheimer disease. This gene encodes a transmembrane protein which is processed at the C-terminus by furin or furin-like proteases to produce a small secreted peptide which inhibits the deposition of beta-amyloid. Mutations which result in extens…	GO:0007399 (nervous system development), GO:0042985 (negative regulation of amyloid precursor protein biosynthetic process), GO:0044267 (cellular protein metabolic process), GO:0000139 (Golgi membrane), GO:0005576 (extracellular region), GO:0005615 (extracellular space), GO:0005794 (Golgi apparatus), GO:0005886 (plasma membrane), GO:0010008 (endosome membrane), GO:0016020 (membrane), GO:0030660 (…		0.647481	0.742618		-0.713636	-0.342868	-0.333595				525.388	91.647	90.4349	-1.16251	7.40431	83.3109	3.69455e-06	0.00102521	8.55539e-16	8.41402e-16	0.2	0.464103	0.0019834	-0.866025	-0.98576	0.0576689	0.0020354		244.831	261.657	94.0867	122.244	123.045
ENSG00000168028	RPSA	PC	ribosomal protein SA	Laminins, a family of extracellular matrix glycoproteins, are the major noncollagenous constituent of basement membranes. They have been implicated in a wide variety of biological processes including cell adhesion, differentiation, migration, signaling, neurite outgrowth and metastasis. Many of the effects of laminin are mediated through interactions with cell surface receptors. These receptors i…	hsa03010 (Ribosome), GO:0000028 (ribosomal small subunit assembly), GO:0000184 (nuclear-transcribed mRNA catabolic process, nonsense-mediated decay), GO:0000447 (endonucleolytic cleavage in ITS1 to separate SSU-rRNA from 5.8S rRNA and LSU-rRNA from tricistronic rRNA transcript (SSU-rRNA, 5.8S rRNA, LSU-rRNA)), GO:0000461 (endonucleolytic cleavage to generate mature 3'-end of SSU-rRNA from (SSU-rR…		-0.484517	-0.549713		0.417655	0.33093	0.285645				524.5	99.1756	22.5625	0.864103	10.2594	83.0948	3.73797e-06	0.00102521	1.64764e-13	1.72274e-13	0.2	0.464103	0.00110363	0.866025	0.990489	0.0576689	0.00111194		839.913	802.713	1571.43	1479.63	1433.85
ENSG00000198056	PRIM1	PC	DNA primase subunit 1	The replication of DNA in eukaryotic cells is carried out by a complex chromosomal replication apparatus, in which DNA polymerase alpha and primase are two key enzymatic components. Primase, which is a heterodimer of a small subunit and a large subunit, synthesizes small RNA primers for the Okazaki fragments made during discontinuous DNA replication. The protein encoded by this gene is the small,…	hsa01100 (Metabolic pathways), hsa03030 (DNA replication), GO:0000082 (G1/S transition of mitotic cell cycle), GO:0000722 (telomere maintenance via recombination), GO:0006269 (DNA replication, synthesis of RNA primer), GO:0006270 (DNA replication initiation), GO:0005654 (nucleoplasm), GO:0005658 (alpha DNA polymerase:primase complex), GO:0016020 (membrane), GO:0003697 (single-stranded DNA binding…		0.571571	0.763118		-0.382451	-0.463049	-0.489188				522.075	70.5165	17.0943	-1.16469	5.51027	82.5061	3.85946e-06	0.00102521	6.62141e-14	7.13862e-14	0.2	0.464103	0.0719647	-0.866025	-0.986702	0.0576689	0.00183719		63.2968	72.5681	31.7056	29.8743	29.3019
ENSG00000128606	LRRC17	PC	leucine rich repeat containing 17		GO:0045671 (negative regulation of osteoclast differentiation), GO:0048539 (bone marrow development), GO:0005615 (extracellular space)		0.826099	0.597582		-0.425965	-0.391493	-0.606223				521.658	71.1978	37.5284	-1.2403	5.54676	82.4052	3.88075e-06	0.00102521	1.81067e-14	1.95528e-14	0.2	0.464103	0.0738206	-0.866025	-0.980907	0.0576689	0.00315799		76.9176	65.3571	31.1333	31.9345	27.2417
ENSG00000129084	PSMA1	PC	proteasome subunit alpha 1	The proteasome is a multicatalytic proteinase complex with a highly ordered ring-shaped 20S core structure. The core structure is composed of 4 rings of 28 non-identical subunits; 2 rings are composed of 7 alpha subunits and 2 rings are composed of 7 beta subunits. Proteasomes are distributed throughout eukaryotic cells at a high concentration and cleave peptides in an ATP/ubiquitin-dependent pro…	hsa03050 (Proteasome), GO:0000165 (MAPK cascade), GO:0000209 (protein polyubiquitination), GO:0002223 (stimulatory C-type lectin receptor signaling pathway), GO:0002479 (antigen processing and presentation of exogenous peptide antigen via MHC class I, TAP-dependent), GO:0006521 (regulation of cellular amino acid metabolic process), GO:0010972 (negative regulation of G2/M transition of mitotic cel…		0.487052	0.706958		-0.47894	-0.440166	-0.274904				518.615	91.0414	14.907	-1.00895	7.32269	81.6688	4.0405e-06	0.00104421	1.37654e-14	1.37138e-14	0.2	0.464103	0.0759918	-0.866025	-0.976552	0.0576689	0.00429492		211.409	246.548	107.25	110.226	123.847
ENSG00000023734	STRAP	PC	serine/threonine kinase receptor associated protein		hsa03013 (RNA transport), GO:0000122 (negative regulation of transcription from RNA polymerase II promoter), GO:0000387 (spliceosomal snRNP assembly), GO:0010633 (negative regulation of epithelial cell migration), GO:0010719 (negative regulation of epithelial to mesenchymal transition), GO:0030277 (maintenance of gastrointestinal epithelium), GO:0030512 (negative regulation of transforming growth…		0.554012	0.44697		-0.325353	-0.368295	-0.307334				508.44	92.034	31.5891	-0.844291	7.46482	79.2253	4.63021e-06	0.00115308	3.53473e-13	3.57206e-13	0.2	0.464103	0.0464257	-0.866025	-0.993495	0.0576689	0.000629226		249.295	231.325	134.606	130.6	136.323
ENSG00000070087	PFN2	PC	profilin 2	The protein encoded by this gene is a ubiquitous actin monomer-binding protein belonging to the profilin family. It is thought to regulate actin polymerization in response to extracellular signals. There are two alternatively spliced transcript variants encoding different isoforms described for this gene. [provided by RefSeq, Jul 2008].	hsa04015 (Rap1 signaling pathway), hsa04810 (Regulation of actin cytoskeleton), hsa05131 (Shigellosis), hsa05132 (Salmonella infection), GO:0010633 (negative regulation of epithelial cell migration), GO:0030036 (actin cytoskeleton organization), GO:0030837 (negative regulation of actin filament polymerization), GO:0030838 (positive regulation of actin filament polymerization), GO:0032233 (positiv…		0.538909	0.826921		-0.48495	-0.28686	-0.59402				508.032	86.7261	19.5424	-1.16078	6.78641	79.1279	4.65579e-06	0.00115308	7.54902e-15	7.39189e-15	0.2	0.464103	0.0934751	-0.866025	-0.967157	0.0576689	0.00710954		148.227	181.42	71.8813	82.7551	66.5017
ENSG00000114686	MRPL3	PC	mitochondrial ribosomal protein L3	Mammalian mitochondrial ribosomal proteins are encoded by nuclear genes and help in protein synthesis within the mitochondrion. Mitochondrial ribosomes (mitoribosomes) consist of a small 28S subunit and a large 39S subunit. They have an estimated 75% protein to rRNA composition compared to prokaryotic ribosomes, where this ratio is reversed. Another difference between mammalian mitoribosomes and …	hsa03010 (Ribosome), GO:0006412 (translation), GO:0070125 (mitochondrial translational elongation), GO:0070126 (mitochondrial translational termination), GO:0005743 (mitochondrial inner membrane), GO:0005762 (mitochondrial large ribosomal subunit), GO:0003723 (RNA binding), GO:0003735 (structural constituent of ribosome), R-HSA-1852241 (Homo sapiens: Organelle biogenesis and maintenance), R-HSA-5…		0.628249	0.609762		-0.574433	-0.334767	-0.328811				503.841	80.0303	18.2889	-1.05581	6.18308	78.1302	4.92778e-06	0.00119405	7.87922e-14	7.83654e-14	0.2	0.464103	0.00176034	-0.866025	-0.99307	0.0576689	0.000691811		105.876	104.503	44.8686	53.3387	53.5676
ENSG00000137947	GTF2B	PC	general transcription factor IIB	This gene encodes the general transcription factor IIB, one of the ubiquitous factors required for transcription initiation by RNA polymerase II. The protein localizes to the nucleus where it forms a complex (the DAB complex) with transcription factors IID and IIA. Transcription factor IIB serves as a bridge between IID, the factor which initially recognizes the promoter sequence, and RNA polymer…	hsa03022 (Basal transcription factors), hsa05203 (Viral carcinogenesis), GO:0006355 (regulation of transcription, DNA-templated), GO:0006366 (transcription from RNA polymerase II promoter), GO:0006367 (transcription initiation from RNA polymerase II promoter), GO:0006368 (transcription elongation from RNA polymerase II promoter), GO:0016032 (viral process), GO:0042795 (snRNA transcription from RN…		0.739257	0.541519		-0.400344	-0.502287	-0.378146				502.448	72.8045	12.3665	-1.1128	5.65625	77.7997	5.02208e-06	0.00119405	2.5666e-13	2.74111e-13	0.2	0.464103	0.0744467	-0.866025	-0.984708	0.0576689	0.0022649		79.3213	68.9054	34.9105	32.3924	35.4828
ENSG00000137692	DCUN1D5	PC	defective in cullin neddylation 1 domain containing 5		GO:0008150 (biological_process), GO:0045116 (protein neddylation), GO:0051443 (positive regulation of ubiquitin-protein transferase activity), GO:0000151 (ubiquitin ligase complex), GO:0005575 (cellular_component), GO:0003674 (molecular_function), GO:0005515 (protein binding), GO:0031624 (ubiquitin conjugating enzyme binding), GO:0032182 (small conjugating protein binding), GO:0097602 (cullin fam…		0.583729	0.627254		-0.260769	-0.422954	-0.52726				499.534	81.2752	17.5738	-1.03116	6.28147	77.1096	5.22601e-06	0.00120075	1.21551e-13	1.21464e-13	0.2	0.464103	0.00063828	-0.866025	-0.992099	0.0576689	0.000842002		110.111	113.545	60.4353	53.7965	49.9049
ENSG00000265794	AC005899.4	PT					0.940225	1.15817		-1.12484	-0.610668	-0.36289				499.168	69.5323	3.42391	-1.80886	5.43669	77.0231	5.25227e-06	0.00120075	4.98037e-16	5.61829e-16	0.2	0.464103	0.0234143	-0.866025	-0.980479	0.0576689	0.00326455		69.5921	81.2671	15.1088	22.4343	27.0127
ENSG00000116209	TMEM59	PC	transmembrane protein 59		GO:0006508 (proteolysis), GO:0006914 (autophagy), GO:0010508 (positive regulation of autophagy), GO:0010955 (negative regulation of protein processing), GO:0090005 (negative regulation of establishment of protein localization to plasma membrane), GO:0090285 (negative regulation of protein glycosylation in Golgi), GO:0000137 (Golgi cis cisterna), GO:0000138 (Golgi trans cisterna), GO:0000139 (Golg…		0.755592	0.445915		-0.504867	-0.364111	-0.332529				497.652	93.4051	64.1036	-1.01722	7.72076	76.6655	5.36253e-06	0.00120283	4.48232e-14	4.46729e-14	0.2	0.464103	0.125217	-0.866025	-0.961453	0.0576689	0.00903233		335.141	270.013	138.726	153.148	156.582
ENSG00000095002	MSH2	PC	mutS homolog 2	This locus is frequently mutated in hereditary nonpolyposis colon cancer (HNPCC). When cloned, it was discovered to be a human homolog of the E. coli mismatch repair gene mutS, consistent with the characteristic alterations in microsatellite sequences (RER+ phenotype) found in HNPCC. Two transcript variants encoding different isoforms have been found for this gene. [provided by RefSeq, Apr 2012].	hsa01524 (Platinum drug resistance), hsa03430 (Mismatch repair), hsa05200 (Pathways in cancer), hsa05210 (Colorectal cancer), GO:0001701 (in utero embryonic development), GO:0006119 (oxidative phosphorylation), GO:0006281 (DNA repair), GO:0006298 (mismatch repair), GO:0006301 (postreplication repair), GO:0006302 (double-strand break repair), GO:0007050 (cell cycle arrest), GO:0007281 (germ cell d…		0.646769	0.512795		-0.48148	-0.340533	-0.337552				495.393	79.9041	68.9661	-0.993126	6.17716	76.1333	5.5318e-06	0.00120386	4.2376e-13	4.27468e-13	0.2	0.464103	0.0377344	-0.866025	-0.989755	0.0576689	0.00124289		107.708	97.9784	48.188	53.3387	53.4532
ENSG00000181163	NPM1	PC	nucleophosmin 1	This gene encodes a phosphoprotein which moves between the nucleus and the cytoplasm. The gene product is thought to be involved in several processes including regulation of the ARF/p53 pathway. A number of genes are fusion partners have been characterized, in particular the anaplastic lymphoma kinase gene on chromosome 2. Mutations in this gene are associated with acute myeloid leukemia. More th…	GO:0006281 (DNA repair), GO:0006334 (nucleosome assembly), GO:0006357 (regulation of transcription from RNA polymerase II promoter), GO:0006886 (intracellular protein transport), GO:0006913 (nucleocytoplasmic transport), GO:0006950 (response to stress), GO:0006977 (DNA damage response, signal transduction by p53 class mediator resulting in cell cycle arrest), GO:0007098 (centrosome cycle), GO:000…		0.688304	0.439399		-0.26674	-0.391434	-0.469528				494.703	99.2934	13.9817	-0.944097	10.3794	75.9711	5.58467e-06	0.00120386	1.80301e-13	1.79568e-13	0.2	0.464103	0.0965806	-0.866025	-0.969632	0.0576689	0.00632355		2032.02	1709.7	1047.2	960.326	909.619
ENSG00000176731	C8orf59	PC	chromosome 8 open reading frame 59				0.737853	0.438397		-0.387839	-0.408917	-0.379494				493.592	86.3896	6.92353	-1.00631	6.75312	75.7103	5.67092e-06	0.00120386	1.7904e-13	1.79098e-13	0.2	0.464103	0.130644	-0.866025	-0.96552	0.0576689	0.007646		170.203	137.925	76.9176	75.773	77.3755
ENSG00000176788	BASP1	PC	brain abundant membrane attached signal protein 1	This gene encodes a membrane bound protein with several transient phosphorylation sites and PEST motifs. Conservation of proteins with PEST sequences among different species supports their functional significance. PEST sequences typically occur in proteins with high turnover rates. Immunological characteristics of this protein are species specific. This protein also undergoes N-terminal myristoyl…	GO:0007356 (thorax and anterior abdomen determination), GO:0008406 (gonad development), GO:0021762 (substantia nigra development), GO:0045892 (negative regulation of transcription, DNA-templated), GO:0060231 (mesenchymal to epithelial transition), GO:0060421 (positive regulation of heart growth), GO:0060539 (diaphragm development), GO:0072075 (metanephric mesenchyme development), GO:0072112 (glom…		0.554965	0.483416		-0.456272	-0.244989	-0.33712				488.957	93.4976	43.8799	-0.871195	7.74067	74.6253	6.04747e-06	0.00126127	5.50962e-13	5.53712e-13	0.2	0.464103	0.00205482	-0.866025	-0.990971	0.0576689	0.00102846		300.803	286.152	148.227	171.92	161.161
ENSG00000138674	SEC31A	PC	SEC31 homolog A, COPII coat complex component	The protein encoded by this gene is similar to yeast Sec31 protein. Yeast Sec31 protein is known to be a component of the COPII protein complex which is responsible for vesicle budding from endoplasmic reticulum (ER). This protein was found to colocalize with SEC13, one of the other components of COPII , in the subcellular structures corresponding to the vesicle transport function. An immunodeple…	hsa04141 (Protein processing in endoplasmic reticulum), GO:0002474 (antigen processing and presentation of peptide antigen via MHC class I), GO:0006888 (ER to Golgi vesicle-mediated transport), GO:0015031 (protein transport), GO:0019886 (antigen processing and presentation of exogenous peptide antigen via MHC class II), GO:0036498 (NA), GO:0048208 (COPII vesicle coating), GO:0051592 (response to …		0.725184	0.809471		-0.7362	-0.53518	-0.263275				486.486	72.7877	66.5769	-1.31873	5.65559	74.0494	6.25953e-06	0.00127293	3.20353e-14	3.44998e-14	0.2	0.464103	0.00130529	-0.866025	-0.986581	0.0576689	0.00186223		76.0019	80.6948	26.326	30.561	37.3142
ENSG00000155096	AZIN1	PC	antizyme inhibitor 1	The protein encoded by this gene belongs to the antizyme inhibitor family, which plays a role in cell growth and proliferation by maintaining polyamine homeostasis within the cell. Antizyme inhibitors are homologs of ornithine decarboxylase (ODC, the key enzyme in polyamine biosynthesis) that have lost the ability to decarboxylase ornithine; however, retain the ability to bind to antizymes. Antiz…	GO:0006521 (regulation of cellular amino acid metabolic process), GO:0033387 (putrescine biosynthetic process from ornithine), GO:0042177 (negative regulation of protein catabolic process), GO:0043085 (positive regulation of catalytic activity), GO:1902269 (positive regulation of polyamine transmembrane transport), GO:0005634 (nucleus), GO:0005737 (cytoplasm), GO:0005829 (cytosol), GO:0003824 (ca…		0.608439	0.775996		-0.542392	-0.478095	-0.363948				485.826	63.7702	42.7189	-1.22436	5.08335	73.8958	6.31756e-06	0.00127293	9.69063e-13	1.06055e-12	0.2	0.464103	0.0503773	-0.866025	-0.988737	0.0576689	0.00143253		48.188	54.3688	20.6029	21.6331	23.5789
ENSG00000083312	TNPO1	PC	transportin 1	This gene encodes the beta subunit of the karyopherin receptor complex which interacts with nuclear localization signals to target nuclear proteins to the nucleus. The karyopherin receptor complex is a heterodimer of an alpha subunit which recognizes the nuclear localization signal and a beta subunit which docks the complex at nucleoporins. Alternate splicing of this gene results in two transcrip…	GO:0000060 (protein import into nucleus, translocation), GO:0006607 (NLS-bearing protein import into nucleus), GO:0006610 (ribosomal protein import into nucleus), GO:0016032 (viral process), GO:0035735 (intraciliary transport involved in cilium morphogenesis), GO:0043488 (regulation of mRNA stability), GO:0005634 (nucleus), GO:0005737 (cytoplasm), GO:0005829 (cytosol), GO:0005929 (cilium), GO:003…		0.566188	0.966252		-0.614742	-0.610711	-0.306987				483.894	78.6676	60.8396	-1.32294	6.08286	73.447	6.49095e-06	0.00127581	2.58571e-14	2.45657e-14	0.2	0.464103	0.132709	-0.866025	-0.951709	0.0576689	0.0126462		90.7674	120.413	38.9166	39.0311	48.6458
ENSG00000198712	MT-CO2	PC	mitochondrially encoded cytochrome c oxidase II		hsa00190 (Oxidative phosphorylation), hsa01100 (Metabolic pathways), hsa04260 (Cardiac muscle contraction), hsa04714 (Thermogenesis), hsa04932 (Non-alcoholic fatty liver disease (NAFLD)), hsa05010 (Alzheimer disease), hsa05012 (Parkinson disease), hsa05016 (Huntington disease), R-HSA-1428517 (Homo sapiens: The citric acid (TCA) cycle and respiratory electron transport), R-HSA-1430728 (Homo sapien…		0.662137	0.483411		-0.413489	-0.399046	-0.333014				482.322	99.9664	9.16127	-0.957141	13.3823	73.0824	6.63602e-06	0.00127581	1.25161e-11	1.24657e-11	0.2	0.464103	0.0755426	-0.866025	-0.985894	0.0576689	0.00200681		15990.7	14127.3	7586	7662.34	8021.29
ENSG00000147677	EIF3H	PC	eukaryotic translation initiation factor 3 subunit H		hsa03013 (RNA transport), hsa05162 (Measles), GO:0006413 (translational initiation), GO:0006446 (regulation of translational initiation), GO:0005829 (cytosol), GO:0005852 (eukaryotic translation initiation factor 3 complex), GO:0016020 (membrane), GO:0070062 (extracellular vesicular exosome), GO:0071541 (eukaryotic translation initiation factor 3 complex, eIF3m), GO:0003723 (RNA binding), GO:0003…		0.509748	0.420514		-0.337094	-0.340755	-0.252413				480.832	97.14	31.6396	-0.779041	8.68743	72.7376	6.77678e-06	0.00127581	3.43263e-12	3.43413e-12	0.2	0.464103	0.0258092	-0.866025	-0.993443	0.0576689	0.000636766		566.695	532.586	314.195	313.393	333.31
ENSG00000143933	CALM2	PC	calmodulin 2		hsa04014 (Ras signaling pathway), hsa04015 (Rap1 signaling pathway), hsa04020 (Calcium signaling pathway), hsa04022 (cGMP-PKG signaling pathway), hsa04024 (cAMP signaling pathway), hsa04070 (Phosphatidylinositol signaling system), hsa04114 (Oocyte meiosis), hsa04218 (Cellular senescence), hsa04261 (Adrenergic signaling in cardiomyocytes), hsa04270 (Vascular smooth muscle contraction), hsa04371 (A…		0.578372	0.407051		-0.404197	-0.261112	-0.320114				480.386	98.6373	47.0851	-0.824499	9.69581	72.6346	6.81954e-06	0.00127581	1.81908e-12	1.81041e-12	0.2	0.464103	0.0688467	-0.866025	-0.98153	0.0576689	0.00300483		1188.9	1055.56	600.69	663.529	636.859
ENSG00000151914	DST	PC	dystonin	This gene encodes a member of the plakin protein family of adhesion junction plaque proteins. Multiple alternatively spliced transcript variants encoding distinct isoforms have been found for this gene, but the full-length nature of some variants has not been defined. It has been reported that some isoforms are expressed in neural and muscle tissue, anchoring neural intermediate filaments to the …	GO:0007010 (cytoskeleton organization), GO:0007155 (cell adhesion), GO:0007229 (integrin-mediated signaling pathway), GO:0008090 (retrograde axon cargo transport), GO:0009611 (response to wounding), GO:0030011 (maintenance of cell polarity), GO:0045104 (intermediate filament cytoskeleton organization), GO:0048870 (cell motility), GO:0005604 (basement membrane), GO:0005634 (nucleus), GO:0005635 (n…		0.717831	0.567757		-0.63735	-0.29177	-0.356468				479.881	84.4297	97.0388	-1.08854	6.55872	72.5178	6.86841e-06	0.00127581	1.30101e-13	1.28924e-13	0.2	0.464103	0.0169824	-0.866025	-0.98171	0.0576689	0.00296103		145.136	130.6	55.5135	71.0801	67.8752
ENSG00000117143	UAP1	PC	UDP-N-acetylglucosamine pyrophosphorylase 1		hsa00520 (Amino sugar and nucleotide sugar metabolism), hsa01100 (Metabolic pathways), GO:0006048 (UDP-N-acetylglucosamine biosynthetic process), GO:0005654 (nucleoplasm), GO:0005829 (cytosol), GO:0005886 (plasma membrane), GO:0003977 (UDP-N-acetylglucosamine diphosphorylase activity), GO:0030246 (carbohydrate binding), GO:0042802 (identical protein binding), R-HSA-392499 (Homo sapiens: Metabolis…		0.425092	0.557584		-0.316972	-0.347235	-0.31847				478.691	89.645	54.9424	-0.831862	7.14205	72.2433	6.98494e-06	0.00127749	3.29795e-12	3.3503e-12	0.2	0.464103	0.0654162	-0.866025	-0.990608	0.0576689	0.00109102		182.45	200.192	108.28	105.991	108.165
ENSG00000154734	ADAMTS1	PC	ADAM metallopeptidase with thrombospondin type 1 motif 1	This gene encodes a member of the ADAMTS (a disintegrin and metalloproteinase with thrombospondin motif) protein family. Members of the family share several distinct protein modules, including a propeptide region, a metalloproteinase domain, a disintegrin-like domain, and a thrombospondin type 1 (TS) motif. Individual members of this family differ in the number of C-terminal TS motifs, and some h…	GO:0001542 (ovulation from ovarian follicle), GO:0001822 (kidney development), GO:0006508 (proteolysis), GO:0007229 (integrin-mediated signaling pathway), GO:0008285 (negative regulation of cell proliferation), GO:0060347 (heart trabecula formation), GO:0005604 (basement membrane), GO:0005829 (cytosol), GO:0031410 (cytoplasmic vesicle), GO:0004222 (metalloendopeptidase activity), GO:0008201 (hepa…		-1.05455	-0.708802		0.700813	0.659154	0.403381				475.013	59.9512	75.9569	1.60018	4.84906	71.397	7.35939e-06	0.00129089	2.07395e-13	2.70551e-13	0.2	0.464103	0.00354151	0.866025	0.973342	0.0576689	0.00520397		11.1027	14.651	42.236	40.9769	33.9948
ENSG00000164949	GEM	PC	GTP binding protein overexpressed in skeletal muscle	The protein encoded by this gene belongs to the RAD/GEM family of GTP-binding proteins. It is associated with the inner face of the plasma membrane and could play a role as a regulatory protein in receptor-mediated signal transduction. Alternative splicing occurs at this locus and two transcript variants encoding the same protein have been identified. [provided by RefSeq, Jul 2008].	GO:0006955 (immune response), GO:0007067 (mitotic nuclear division), GO:0007165 (signal transduction), GO:0007166 (cell surface receptor signaling pathway), GO:0051276 (chromosome organization), GO:0051310 (metaphase plate congression), GO:0005634 (nucleus), GO:0009898 (cytoplasmic side of plasma membrane), GO:0030496 (midbody), GO:0051233 (spindle midzone), GO:0072686 (mitotic spindle), GO:00002…		0.874057	1.21399		-0.972274	-0.509111	-0.606663				473.953	40.0488	39.2361	-2.04775	3.72592	71.1537	7.47147e-06	0.00129089	1.02926e-13	1.30019e-13	0.2	0.464103	0.0907707	-0.866025	-0.973676	0.0576689	0.00510669		20.8319	26.8983	4.34951	6.75318	6.18088
ENSG00000271982	SNORD58B	snoRNA	small nucleolar RNA, C/D box 58B				-0.821652	-1.33332		0.94331	0.664535	0.547123				473.901	53.6171	0.143013	2.02254	4.48173	71.1418	7.477e-06	0.00129089	2.7753e-14	3.96364e-14	0.2	0.464103	0.00569147	0.866025	0.963338	0.0576689	0.00838021		9.50024	6.06642	37.0853	30.2176	27.6995
ENSG00000109881	CCDC34	PC	coiled-coil domain containing 34				0.608643	0.692735		-0.495709	-0.52335	-0.282319				473.755	69.7426	60.2675	-1.13119	5.45563	71.1084	7.49256e-06	0.00129089	1.4747e-12	1.58238e-12	0.2	0.464103	0.00243132	-0.866025	-0.991694	0.0576689	0.000907519		62.8389	66.7306	28.1573	27.585	32.9647
ENSG00000127947	PTPN12	PC	protein tyrosine phosphatase, non-receptor type 12	The protein encoded by this gene is a member of the protein tyrosine phosphatase (PTP) family. PTPs are signaling molecules that regulate a variety of cellular processes including cell growth, differentiation, mitotic cycle, and oncogenic transformation. This PTP contains a C-terminal PEST motif, which serves as a protein-protein interaction domain, and may regulate protein intracellular half-lif…	GO:0006470 (protein dephosphorylation), GO:0035335 (peptidyl-tyrosine dephosphorylation), GO:0038128 (ERBB2 signaling pathway), GO:0042058 (regulation of epidermal growth factor receptor signaling pathway), GO:0042246 (tissue regeneration), GO:0071364 (cellular response to epidermal growth factor stimulus), GO:1901185 (negative regulation of ERBB signaling pathway), GO:2000587 (negative regulatio…		0.678652	0.651005		-0.505578	-0.452131	-0.37195				470.788	61.3392	20.7538	-1.18112	4.93794	70.4293	7.81751e-06	0.00132764	6.16526e-12	6.76588e-12	0.2	0.464103	5.87315e-05	-0.866025	-0.998366	0.0576689	7.92692e-05		46.2421	45.3264	19.2294	20.0306	21.2897
ENSG00000266412	NCOA4	PC	nuclear receptor coactivator 4	This gene encodes an androgen receptor coactivator. The encoded protein interacts with the androgen receptor in a ligand-dependent manner to enhance its transcriptional activity. Chromosomal translocations between this gene and the ret tyrosine kinase gene, also located on chromosome 10, have been associated with papillary thyroid carcinoma. Alternatively spliced transcript variants have been des…	hsa04216 (Ferroptosis), hsa05200 (Pathways in cancer), hsa05216 (Thyroid cancer), GO:0006351 (transcription, DNA-templated), GO:0006622 (protein targeting to lysosome), GO:0008584 (male gonad development), GO:0030521 (androgen receptor signaling pathway), GO:0045893 (positive regulation of transcription, DNA-templated), GO:0005634 (nucleus), GO:0044754 (autolysosome), GO:0003713 (transcription co…		0.554631	0.553284		-0.512234	-0.317289	-0.278392				466.123	82.8819	84.0246	-0.941031	6.42866	69.3666	8.36064e-06	0.00138748	2.54194e-12	2.57904e-12	0.2	0.464103	0.00299382	-0.866025	-0.992545	0.0576689	0.000771768		120.642	120.527	56.5436	65.0137	66.8451
ENSG00000137267	TUBB2A	PC	tubulin beta 2A class IIa		hsa04145 (Phagosome), hsa04540 (Gap junction), hsa05130 (Pathogenic Escherichia coli infection), GO:0007010 (cytoskeleton organization), GO:0007017 (microtubule-based process), GO:0005634 (nucleus), GO:0005737 (cytoplasm), GO:0005874 (microtubule), GO:0015630 (microtubule cytoskeleton), GO:0070062 (extracellular vesicular exosome), GO:1903561 (extracellular vesicle), GO:0003924 (GTPase activity),…		-0.897412	-0.829884		0.629079	0.682088	0.416128				465.771	48.2503	36.5778	1.65892	4.17853	69.2867	8.40334e-06	0.00138748	5.455e-12	7.4268e-12	0.2	0.464103	0.00643301	0.866025	0.981513	0.0576689	0.00300892		7.55441	8.01225	25.5247	26.5549	21.7475
ENSG00000141279	NPEPPS	PC	aminopeptidase puromycin sensitive	This gene encodes the puromycin-sensitive aminopeptidase, a zinc metallopeptidase which hydrolyzes amino acids from the N-terminus of its substrate. The protein has been localized to both the cytoplasm and to cellular membranes. This enzyme degrades enkaphalins in the brain, and studies in mouse suggest that it is involved in proteolytic events regulating the cell cycle. [provided by RefSeq, Jul …	GO:0000209 (protein polyubiquitination), GO:0006508 (proteolysis), GO:0043171 (peptide catabolic process), GO:0071456 (cellular response to hypoxia), GO:1903955 (NA), GO:0005634 (nucleus), GO:0005737 (cytoplasm), GO:0005829 (cytosol), GO:0070062 (extracellular vesicular exosome), GO:0004177 (aminopeptidase activity), GO:0008270 (zinc ion binding), GO:0042277 (peptide binding), GO:0070006 (metallo…		0.725797	0.426876		-0.281152	-0.401577	-0.469943				461.967	89.7964	37.6714	-0.979641	7.16663	68.425	8.8802e-06	0.00141958	1.10367e-12	1.1059e-12	0.2	0.464103	0.122196	-0.866025	-0.961044	0.0576689	0.00917567		224.915	182.45	110.912	101.87	97.0627
ENSG00000137804	NUSAP1	PC	nucleolar and spindle associated protein 1	NUSAP1 is a nucleolar-spindle-associated protein that plays a role in spindle microtubule organization (Raemaekers et al., 2003 [PubMed 12963707]).[supplied by OMIM, Jun 2009].	GO:0000070 (mitotic sister chromatid segregation), GO:0000281 (mitotic cytokinesis), GO:0007076 (mitotic chromosome condensation), GO:0040001 (establishment of mitotic spindle localization), GO:0045840 (positive regulation of mitosis), GO:0005694 (chromosome), GO:0005730 (nucleolus), GO:0005737 (cytoplasm), GO:0005876 (spindle microtubule), GO:0003677 (DNA binding), GO:0003723 (RNA binding), GO:0…		0.45908	0.760408		-0.478887	-0.252819	-0.487782				461.548	89.3001	43.9303	-1.03494	7.09572	68.3303	8.93458e-06	0.00141958	6.13564e-13	6.12456e-13	0.2	0.464103	0.110756	-0.866025	-0.960312	0.0576689	0.00943439		176.384	217.819	91.1107	106.906	90.5384
ENSG00000100479	POLE2	PC	DNA polymerase epsilon 2, accessory subunit		hsa01100 (Metabolic pathways), hsa03030 (DNA replication), hsa03410 (Base excision repair), hsa03420 (Nucleotide excision repair), GO:0000082 (G1/S transition of mitotic cell cycle), GO:0000722 (telomere maintenance via recombination), GO:0006260 (DNA replication), GO:0006261 (DNA-dependent DNA replication), GO:0006270 (DNA replication initiation), GO:0006281 (DNA repair), GO:0042276 (error-prone…		0.94303	0.748917		-0.582974	-0.582974	-0.525998				460.667	38.7702	18.8778	-1.65953	3.6569	66.812	9.8633e-06	0.00141958	1.24606e-11	1.50869e-11	0.138641	0.464103	0.066889	-0.888523	-0.99034	0.043925	0.00113801		22.5488	19.4583	6.52426	6.52426	6.86764
ENSG00000182220	ATP6AP2	PC	ATPase H+ transporting accessory protein 2	This gene encodes a protein that is associated with adenosine triphosphatases (ATPases). Proton-translocating ATPases have fundamental roles in energy conservation, secondary active transport, acidification of intracellular compartments, and cellular pH homeostasis. There are three classes of ATPases- F, P, and V. The vacuolar (V-type) ATPases have a transmembrane proton-conducting sector and an …	hsa04614 (Renin-angiotensin system), GO:0002003 (angiotensin maturation), GO:0021903 (rostrocaudal neural tube patterning), GO:0030177 (positive regulation of Wnt signaling pathway), GO:0032914 (positive regulation of transforming growth factor beta1 production), GO:0043312 (neutrophil degranulation), GO:0043408 (regulation of MAPK cascade), GO:0048069 (eye pigmentation), GO:0060323 (head morphog…		0.451018	0.523302		-0.396566	-0.288877	-0.288877				459.96	87.0962	53.3692	-0.825671	6.82654	66.6557	9.96533e-06	0.00141958	1.8994e-11	1.94052e-11	0.138641	0.464103	0.00944644	-0.888523	-0.994574	0.043925	0.000479437		149.486	157.269	82.1828	88.7071	88.7071
ENSG00000197170	PSMD12	PC	proteasome 26S subunit, non-ATPase 12	The 26S proteasome is a multicatalytic proteinase complex with a highly ordered structure composed of 2 complexes, a 20S core and a 19S regulator. The 20S core is composed of 4 rings of 28 non-identical subunits; 2 rings are composed of 7 alpha subunits and 2 rings are composed of 7 beta subunits. The 19S regulator is composed of a base, which contains 6 ATPase subunits and 2 non-ATPase subunits,…	hsa03050 (Proteasome), hsa05169 (Epstein-Barr virus infection), GO:0000165 (MAPK cascade), GO:0000209 (protein polyubiquitination), GO:0002223 (stimulatory C-type lectin receptor signaling pathway), GO:0002479 (antigen processing and presentation of exogenous peptide antigen via MHC class I, TAP-dependent), GO:0006521 (regulation of cellular amino acid metabolic process), GO:0010972 (negative reg…		0.729063	0.836019		-0.77017	-0.606173	-0.18874				458.613	85.4391	51.0642	-1.31039	6.65919	67.6685	9.32585e-06	0.00141958	7.14789e-14	6.96694e-14	0.2	0.464103	0.00259139	-0.866025	-0.978743	0.0576689	0.00370846		151.203	162.992	52.1941	58.7184	79.0924
ENSG00000116750	UCHL5	PC	ubiquitin C-terminal hydrolase L5		GO:0006281 (DNA repair), GO:0006310 (DNA recombination), GO:0006351 (transcription, DNA-templated), GO:0006355 (regulation of transcription, DNA-templated), GO:0006511 (ubiquitin-dependent protein catabolic process), GO:0010951 (negative regulation of endopeptidase activity), GO:0016579 (protein deubiquitination), GO:0021670 (lateral ventricle development), GO:0030901 (midbrain development), GO:0…		0.555662	0.945383		-0.552683	-0.419999	-0.528364				458.329	61.5831	47.0682	-1.3483	4.95081	67.6047	9.36469e-06	0.00141958	3.06549e-12	3.37144e-12	0.2	0.464103	0.141621	-0.866025	-0.957657	0.0576689	0.0103926		41.5492	55.0556	18.1993	20.1451	18.5426
ENSG00000115368	WDR75	PC	WD repeat domain 75		hsa03008 (Ribosome biogenesis in eukaryotes), GO:0006364 (rRNA processing), GO:0045943 (positive regulation of transcription from RNA polymerase I promoter), GO:1903146 (regulation of mitochondrion degradation), GO:1903955 (NA), GO:2000234 (positive regulation of rRNA processing), GO:0005654 (nucleoplasm), GO:0005730 (nucleolus), GO:0003723 (RNA binding), R-HSA-6790901 (Homo sapiens: rRNA modific…		0.737503	0.423008		-0.354953	-0.373249	-0.43231				457.104	82.6548	62.5053	-0.998457	6.4004	67.3294	9.53432e-06	0.00141958	3.1949e-12	3.21488e-12	0.2	0.464103	0.136714	-0.866025	-0.961027	0.0576689	0.00918169		133.576	107.021	61.5799	60.7786	58.2605
ENSG00000152601	MBNL1	PC	muscleblind like splicing regulator 1		GO:0001701 (in utero embryonic development), GO:0006397 (mRNA processing), GO:0007399 (nervous system development), GO:0008380 (RNA splicing), GO:0030326 (embryonic limb morphogenesis), GO:0043484 (regulation of RNA splicing), GO:0045445 (myoblast differentiation), GO:0005634 (nucleus), GO:0005654 (nucleoplasm), GO:0005737 (cytoplasm), GO:0005813 (centrosome), GO:0005829 (cytosol), GO:0010494 (cy…		0.554921	0.639008		-0.5016	-0.252222	-0.440107				456.908	75.4879	91.049	-1.02635	5.84562	67.2853	9.56184e-06	0.00141958	5.17805e-12	5.22599e-12	0.2	0.464103	0.00252979	-0.866025	-0.990113	0.0576689	0.00117842		80.008	84.9299	37.4287	44.8686	39.1456
ENSG00000198899	MT-ATP6	PC	mitochondrially encoded ATP synthase membrane subunit 6		hsa00190 (Oxidative phosphorylation), hsa01100 (Metabolic pathways), hsa04714 (Thermogenesis), hsa05010 (Alzheimer disease), hsa05012 (Parkinson disease), hsa05016 (Huntington disease), R-HSA-1428517 (Homo sapiens: The citric acid (TCA) cycle and respiratory electron transport), R-HSA-1430728 (Homo sapiens: Metabolism), R-HSA-163200 (Homo sapiens: Respiratory electron transport, ATP synthesis by …		0.498259	0.763821		-0.556395	-0.434519	-0.271166				456.471	99.9159	9.11079	-1.05336	12.9289	67.1873	9.62335e-06	0.00141958	8.73339e-12	8.735e-12	0.2	0.464103	0.0887271	-0.866025	-0.968246	0.0576689	0.00676007		10277.2	12354.7	4946.53	5382.74	6028.3
ENSG00000113643	RARS	PC	arginyl-tRNA synthetase	Aminoacyl-tRNA synthetases catalyze the aminoacylation of tRNA by their cognate amino acid. Because of their central role in linking amino acids with nucleotide triplets contained in tRNAs, aminoacyl-tRNA synthetases are thought to be among the first proteins that appeared in evolution. Arginyl-tRNA synthetase belongs to the class-I aminoacyl-tRNA synthetase family. [provided by RefSeq, Jul 2008]…	hsa00970 (Aminoacyl-tRNA biosynthesis), GO:0006418 (tRNA aminoacylation for protein translation), GO:0006420 (arginyl-tRNA aminoacylation), GO:0005634 (nucleus), GO:0005654 (nucleoplasm), GO:0005737 (cytoplasm), GO:0005739 (mitochondrion), GO:0005829 (cytosol), GO:0016020 (membrane), GO:0017101 (aminoacyl-tRNA synthetase multienzyme complex), GO:0070062 (extracellular vesicular exosome), GO:00000…		0.626972	0.382114		-0.35588	-0.290178	-0.363028				455.269	93.5818	17.0354	-0.853522	7.74837	66.9176	9.79507e-06	0.00141958	6.40279e-12	6.43617e-12	0.2	0.464103	0.116741	-0.866025	-0.970017	0.0576689	0.00620403		318.43	268.41	160.131	167.685	159.329
ENSG00000114784	EIF1B	PC	eukaryotic translation initiation factor 1B		hsa03013 (RNA transport), GO:0006413 (translational initiation), GO:0006446 (regulation of translational initiation), GO:0005575 (cellular_component), GO:0003723 (RNA binding), GO:0003743 (translation initiation factor activity)		0.528891	0.49761		-0.287614	-0.409811	-0.329076				454.774	80.7285	12.8123	-0.877139	6.23837	66.8067	9.86673e-06	0.00141958	2.06294e-11	2.12268e-11	0.2	0.464103	0.000142226	-0.866025	-0.997187	0.0576689	0.000179016		104.732	102.442	58.6039	53.6821	56.887
ENSG00000198938	MT-CO3	PC	mitochondrially encoded cytochrome c oxidase III		hsa00190 (Oxidative phosphorylation), hsa01100 (Metabolic pathways), hsa04260 (Cardiac muscle contraction), hsa04714 (Thermogenesis), hsa04932 (Non-alcoholic fatty liver disease (NAFLD)), hsa05010 (Alzheimer disease), hsa05012 (Parkinson disease), hsa05016 (Huntington disease), R-HSA-1428517 (Homo sapiens: The citric acid (TCA) cycle and respiratory electron transport), R-HSA-1430728 (Homo sapien…		0.609579	0.53221		-0.512459	-0.369712	-0.259619				452.57	99.9495	12.6441	-0.948511	13.2237	66.3136	1.01931e-05	0.00141958	5.4942e-11	5.47167e-11	0.2	0.464103	0.00193374	-0.866025	-0.990217	0.0576689	0.00115984		13816.8	13095.2	6346.96	7007.29	7563.11
ENSG00000198886	MT-ND4	PC	mitochondrially encoded NADH:ubiquinone oxidoreductase core subunit 4		hsa00190 (Oxidative phosphorylation), hsa01100 (Metabolic pathways), hsa04714 (Thermogenesis), hsa04723 (Retrograde endocannabinoid signaling), hsa05012 (Parkinson disease), R-HSA-1428517 (Homo sapiens: The citric acid (TCA) cycle and respiratory electron transport), R-HSA-1430728 (Homo sapiens: Metabolism), R-HSA-163200 (Homo sapiens: Respiratory electron transport, ATP synthesis by chemiosmotic…		0.780739	0.809452		-0.844188	-0.503073	-0.24293				452.324	99.9916	46.6981	-1.30473	13.4816	66.2586	1.02303e-05	0.00141958	1.54841e-12	1.57087e-12	0.2	0.464103	0.00492175	-0.866025	-0.983954	0.0576689	0.00243415		17615.3	17969.4	5709.99	7233.57	8663.3
ENSG00000115239	ASB3	PC	ankyrin repeat and SOCS box containing 3	This locus represents naturally occurring read-through transcription between the neighboring GPR75 (G protein-coupled receptor 75) and ASB3 (ankyrin repeat and SOCS box containing 3) on chromosome 2. The transcript includes exons from both GPR75 and ASB3 and translation initiates in the 5_ non-coding exon of GPR75. The resulting protein has a novel N-terminus but is otherwise identical to that en…	GO:0016567 (protein ubiquitination), GO:0035556 (intracellular signal transduction), GO:0000151 (ubiquitin ligase complex), GO:0005634 (nucleus), GO:0005737 (cytoplasm), GO:0004842 (ubiquitin-protein transferase activity), GO:0005515 (protein binding), GO:0031625 (ubiquitin protein ligase binding), R-HSA-1280218 (Homo sapiens: Adaptive Immune System), R-HSA-168256 (Homo sapiens: Immune System), R…		0.722909	0.956235		-0.458111	-0.669281	-0.551751				451.985	43.6154	36.2329	-1.60327	3.9195	66.183	1.02817e-05	0.00141958	1.02784e-11	1.21425e-11	0.2	0.464103	0.0725907	-0.866025	-0.984664	0.0576689	0.0022746		22.7777	27.1272	8.92794	7.43995	8.24117
ENSG00000242697	RPL5P12	p_Pg	ribosomal protein L5 pseudogene 12				1.96313	0.717578		-0.931731	-0.912227	-0.836749				451.285	52.1955	15.437	-2.67467	4.40586	66.0268	1.03889e-05	0.00141958	1.66405e-14	2.13969e-14	0.2	0.464103	0.297579	-0.866025	-0.837763	0.0576689	0.0765061		60.5497	24.3801	6.4098	6.52426	6.9821
ENSG00000133112	TPT1	PC	tumor protein, translationally-controlled 1		GO:0006816 (calcium ion transport), GO:0006874 (cellular calcium ion homeostasis), GO:0009615 (response to virus), GO:0030154 (cell differentiation), GO:0042981 (regulation of apoptotic process), GO:0043066 (negative regulation of apoptotic process), GO:1902230 (negative regulation of intrinsic apoptotic signaling pathway in response to DNA damage), GO:0005615 (extracellular space), GO:0005634 (n…		0.456575	0.429078		-0.336668	-0.306607	-0.242379				448.098	99.5626	50.0715	-0.738361	10.8469	65.3175	1.08929e-05	0.00147153	1.14525e-10	1.13541e-10	0.2	0.464103	0.000134783	-0.866025	-0.997429	0.0576689	0.000156393		2447.4	2401.16	1411.42	1441.18	1506.88
ENSG00000166012	TAF1D	PC	TATA-box binding protein associated factor, RNA polymerase I subunit D	TAF1D is a member of the SL1 complex, which includes TBP (MIM 600075) and TAF1A (MIM 604903), TAF1B (MIM 604904), and TAF1C (MIM 604905), and plays a role in RNA polymerase I transcription (Wang et al., 2004 [PubMed 15520167]; Gorski et al., 2007 [PubMed 17318177]).[supplied by OMIM, Jun 2009]. Sequence Note: This RefSeq record was created from transcript and genomic sequence data to make the seq…	GO:0006355 (regulation of transcription, DNA-templated), GO:0006361 (transcription initiation from RNA polymerase I promoter), GO:0006362 (transcription elongation from RNA polymerase I promoter), GO:0006363 (termination of RNA polymerase I transcription), GO:0045815 (positive regulation of gene expression, epigenetic), GO:0005654 (nucleoplasm), GO:0005668 (RNA polymerase transcription factor SL1…		0.631738	0.531334		-0.185887	-0.479807	-0.497378				446.867	88.1729	35.8375	-0.978429	6.95427	65.0443	1.10948e-05	0.00148197	2.92739e-12	2.93958e-12	0.2	0.464103	0.00331665	-0.866025	-0.981768	0.0576689	0.00294717		181.878	169.516	102.328	83.0985	82.0683
ENSG00000198763	MT-ND2	PC	mitochondrially encoded NADH:ubiquinone oxidoreductase core subunit 2		hsa00190 (Oxidative phosphorylation), hsa01100 (Metabolic pathways), hsa04714 (Thermogenesis), hsa04723 (Retrograde endocannabinoid signaling), hsa05012 (Parkinson disease), R-HSA-1428517 (Homo sapiens: The citric acid (TCA) cycle and respiratory electron transport), R-HSA-1430728 (Homo sapiens: Metabolism), R-HSA-163200 (Homo sapiens: Respiratory electron transport, ATP synthesis by chemiosmotic…		0.60661	0.606435		-0.617705	-0.367965	-0.227374				445.326	99.8906	26.0368	-1.0024	12.1768	64.7029	1.13536e-05	0.00148841	1.24308e-11	1.24084e-11	0.2	0.464103	0.0059179	-0.866025	-0.985399	0.0576689	0.00211332		6618.92	6618.12	2831.76	3367.32	3712.19
ENSG00000113460	BRIX1	PC	BRX1, biogenesis of ribosomes		GO:0000027 (ribosomal large subunit assembly), GO:0005634 (nucleus), GO:0005730 (nucleolus), GO:0003723 (RNA binding)		0.978165	0.443154		-0.572583	-0.456572	-0.392164				445.092	84.825	61.8575	-1.23292	6.59231	64.6511	1.13934e-05	0.00148841	5.74477e-13	5.64496e-13	0.2	0.464103	0.196888	-0.866025	-0.921302	0.0576689	0.0261871		174.209	119.611	58.146	63.1823	66.1583
ENSG00000070081	NUCB2	PC	nucleobindin 2	This gene encodes a protein with a suggested role in calcium level maintenance, eating regulation in the hypothalamus, and release of tumor necrosis factor from vascular endothelial cells. This protein binds calcium and has EF-folding domains. [provided by RefSeq, Oct 2011]. Publication Note: This RefSeq record includes a subset of the publications that are available for this gene. Please see the…	GO:0005615 (extracellular space), GO:0005635 (nuclear envelope), GO:0005783 (endoplasmic reticulum), GO:0005793 (endoplasmic reticulum-Golgi intermediate compartment), GO:0005794 (Golgi apparatus), GO:0005829 (cytosol), GO:0005886 (plasma membrane), GO:0070062 (extracellular vesicular exosome), GO:0003677 (DNA binding), GO:0005509 (calcium ion binding), GO:0005515 (protein binding)		0.71946	0.380792		-0.322253	-0.405466	-0.372533				440.336	89.8133	29.2925	-0.939258	7.16709	63.6019	1.22386e-05	0.0015741	7.72989e-12	7.77105e-12	0.2	0.464103	0.152145	-0.866025	-0.952129	0.0576689	0.0124824		225.03	177.529	108.28	102.099	104.503
ENSG00000128789	PSMG2	PC	proteasome assembly chaperone 2		GO:0007094 (mitotic spindle assembly checkpoint), GO:0043066 (negative regulation of apoptotic process), GO:0043248 (proteasome assembly), GO:0000502 (proteasome complex), GO:0005634 (nucleus), GO:0005829 (cytosol), GO:0005515 (protein binding)		0.443673	0.476678		-0.370034	-0.282223	-0.268094				439.237	88.644	10.6839	-0.777999	7.02293	63.3602	1.24438e-05	0.0015741	7.31931e-11	7.47434e-11	0.2	0.464103	0.000225286	-0.866025	-0.996938	0.0576689	0.000203267		171.119	175.125	96.4904	102.671	103.701
ENSG00000163918	RFC4	PC	replication factor C subunit 4	The elongation of primed DNA templates by DNA polymerase delta and DNA polymerase epsilon requires the accessory proteins proliferating cell nuclear antigen (PCNA) and replication factor C (RFC). RFC, also named activator 1, is a protein complex consisting of five distinct subunits of 140, 40, 38, 37, and 36 kD. This gene encodes the 37 kD subunit. This subunit forms a core complex with the 36 an…	hsa03030 (DNA replication), hsa03420 (Nucleotide excision repair), hsa03430 (Mismatch repair), GO:0000722 (telomere maintenance via recombination), GO:0006260 (DNA replication), GO:0006271 (DNA strand elongation involved in DNA replication), GO:0006283 (transcription-coupled nucleotide-excision repair), GO:0006296 (nucleotide-excision repair, DNA incision, 5'-to lesion), GO:0006297 (nucleotide-ex…		0.476325	0.453322		-0.254281	-0.385818	-0.289547				439.222	88.9637	14.9996	-0.785187	7.05532	63.357	1.24466e-05	0.0015741	6.24192e-11	6.36569e-11	0.2	0.464103	0.000274091	-0.866025	-0.996103	0.0576689	0.000291881		178.902	176.041	107.021	97.5205	104.388
ENSG00000164181	ELOVL7	PC	ELOVL fatty acid elongase 7		hsa00062 (Fatty acid elongation), hsa01040 (Biosynthesis of unsaturated fatty acids), hsa01100 (Metabolic pathways), hsa01212 (Fatty acid metabolism), GO:0019367 (fatty acid elongation, saturated fatty acid), GO:0034626 (fatty acid elongation, polyunsaturated fatty acid), GO:0035338 (long-chain fatty-acyl-CoA biosynthetic process), GO:0042761 (very long-chain fatty acid biosynthetic process), GO:…		0.842784	0.874993		-0.38637	-0.58235	-0.749057				437.796	42.0256	77.0506	-1.64375	3.82945	63.0441	1.27186e-05	0.00157779	1.21635e-11	1.45063e-11	0.2	0.464103	0.000559508	-0.866025	-0.995087	0.0576689	0.000413111		23.35	23.9223	8.81348	7.43995	6.4098
ENSG00000103342	GSPT1	PC	G1 to S phase transition 1		hsa03015 (mRNA surveillance pathway), GO:0000082 (G1/S transition of mitotic cell cycle), GO:0000184 (nuclear-transcribed mRNA catabolic process, nonsense-mediated decay), GO:0002184 (cytoplasmic translational termination), GO:0006415 (translational termination), GO:0006479 (protein methylation), GO:0005622 (intracellular), GO:0005829 (cytosol), GO:0018444 (translation release factor complex), GO…		1.15469	0.563127		-0.850933	-0.331606	-0.535277				437.679	92.5555	66.1647	-1.46228	7.56397	63.0183	1.27413e-05	0.00157779	1.18213e-13	1.17856e-13	0.2	0.464103	0.186785	-0.866025	-0.9176	0.0576689	0.0280401		368.22	243.687	90.1951	130.142	112.744
ENSG00000135334	AKIRIN2	PC	akirin 2		GO:0000122 (negative regulation of transcription from RNA polymerase II promoter), GO:0006351 (transcription, DNA-templated), GO:0008284 (positive regulation of cell proliferation), GO:0009790 (embryo development), GO:0010950 (positive regulation of endopeptidase activity), GO:0032496 (response to lipopolysaccharide), GO:0032755 (positive regulation of interleukin-6 production), GO:0045087 (innat…		0.585978	0.611701		-0.548772	-0.368793	-0.280113				436.775	71.61	25.8097	-1.03583	5.57752	62.8204	1.29173e-05	0.0015831	2.76857e-11	2.93618e-11	0.2	0.464103	0.00137455	-0.866025	-0.992433	0.0576689	0.000789286		67.9897	69.2487	29.8743	34.1093	36.3985
ENSG00000167766	ZNF83	PC	zinc finger protein 83		GO:0006351 (transcription, DNA-templated), GO:0006355 (regulation of transcription, DNA-templated), GO:0005634 (nucleus), GO:0003677 (DNA binding), GO:0003700 (sequence-specific DNA binding transcription factor activity), GO:0005515 (protein binding), GO:0046872 (metal ion binding)		0.716329	1.26091		-0.608912	-0.759413	-0.608912				436.63	29.2816	49.9874	-2.13446	3.12085	61.5752	1.40948e-05	0.001659	1.09558e-11	1.44116e-11	0.138641	0.464103	0.167973	-0.888523	-0.943055	0.043925	0.0161725		12.4762	19.1149	3.7772	3.2049	3.7772
ENSG00000141452	RMC1	PC	regulator of MON1-CCZ1	This gene encodes a colon cancer associated protein. [provided by RefSeq, Jan 2013].	GO:0005765 (lysosomal membrane)		0.682837	0.54518		-0.363191	-0.495599	-0.369228				435.849	65.0656	30.6469	-1.08174	5.1611	62.6178	1.31006e-05	0.00158919	6.59459e-11	7.10269e-11	0.2	0.464103	0.0420877	-0.866025	-0.990762	0.0576689	0.00106437		54.5978	49.447	25.4103	23.0066	25.2958
ENSG00000198618	PPIAP22	p_Pg	peptidylprolyl isomerase A pseudogene 22				-0.866105	-0.952739		0.561608	0.51932	0.737916				434.071	33.6558	3.86136	1.94699	3.37117	62.2293	1.34609e-05	0.0016164	2.94095e-11	4.46599e-11	0.2	0.464103	0.00380061	0.866025	0.986863	0.0576689	0.001804		3.89166	3.54828	13.8497	13.3919	15.91
ENSG00000269897	COMMD3-BMI1	PC	COMMD3-BMI1 readthrough	This locus represents naturally occurring read-through transcription between the neighboring COMM domain-containing protein 3 and polycomb complex protein BMI-1 genes on chromosome 10. The read-through transcript produces a fusion protein that shares sequence identity with each individual gene product. [provided by RefSeq, Feb 2011]. Sequence Note: This RefSeq record was created from transcript a…	hsa04550 (Signaling pathways regulating pluripotency of stem cells), hsa05202 (Transcriptional misregulation in cancer), hsa05206 (MicroRNAs in cancer)		0.581712	0.805223		-0.662653	-0.365122	-0.35916				432.019	65.8059	9.86792	-1.21763	5.20563	61.7823	1.38902e-05	0.00165127	1.39051e-11	1.50178e-11	0.2	0.464103	0.0575331	-0.866025	-0.976923	0.0576689	0.00419376		51.2784	60.2063	20.4885	25.6392	25.7537
ENSG00000128245	YWHAH	PC	tyrosine 3-monooxygenase/tryptophan 5-monooxygenase activation protein eta	This gene product belongs to the 14-3-3 family of proteins which mediate signal transduction by binding to phosphoserine-containing proteins. This highly conserved protein family is found in both plants and mammals, and this protein is 99% identical to the mouse, rat and bovine orthologs. This gene contains a 7 bp repeat sequence in its 5_ UTR, and changes in the number of this repeat have been a…	hsa04110 (Cell cycle), hsa04114 (Oocyte meiosis), hsa04151 (PI3K-Akt signaling pathway), hsa04390 (Hippo signaling pathway), hsa05160 (Hepatitis C), hsa05203 (Viral carcinogenesis), GO:0002028 (regulation of sodium ion transport), GO:0006713 (glucocorticoid catabolic process), GO:0006886 (intracellular protein transport), GO:0021762 (substantia nigra development), GO:0042921 (glucocorticoid recep…		0.522919	0.463892		-0.462271	-0.280957	-0.243582				427.97	88.7029	38.4706	-0.831954	7.03052	60.9034	1.47834e-05	0.00169536	5.69496e-11	5.78309e-11	0.2	0.464103	0.00101232	-0.866025	-0.989353	0.0576689	0.0013166		180.733	173.408	90.3095	102.671	105.418
ENSG00000164924	YWHAZ	PC	tyrosine 3-monooxygenase/tryptophan 5-monooxygenase activation protein zeta	This gene product belongs to the 14-3-3 family of proteins which mediate signal transduction by binding to phosphoserine-containing proteins. This highly conserved protein family is found in both plants and mammals, and this protein is 99% identical to the mouse, rat and sheep orthologs. The encoded protein interacts with IRS1 protein, suggesting a role in regulating insulin sensitivity. Several …	hsa04110 (Cell cycle), hsa04114 (Oocyte meiosis), hsa04151 (PI3K-Akt signaling pathway), hsa04390 (Hippo signaling pathway), hsa05130 (Pathogenic Escherichia coli infection), hsa05160 (Hepatitis C), hsa05161 (Hepatitis B), hsa05203 (Viral carcinogenesis), GO:0006605 (protein targeting), GO:0007165 (signal transduction), GO:0030168 (platelet activation), GO:0043066 (negative regulation of apoptoti…		0.401102	0.903083		-0.519525	-0.301438	-0.483223				427.501	96.0633	51.9223	-1.11223	8.34866	60.8019	1.48909e-05	0.00169536	2.35348e-12	2.35263e-12	0.2	0.464103	0.193248	-0.866025	-0.920113	0.0576689	0.0267778		397.637	563.948	209.12	243.572	214.499
ENSG00000100519	PSMC6	PC	proteasome 26S subunit, ATPase 6	The 26S proteasome is a multicatalytic proteinase complex with a highly ordered structure composed of 2 complexes, a 20S core and a 19S regulator. The 20S core is composed of 4 rings of 28 non-identical subunits; 2 rings are composed of 7 alpha subunits and 2 rings are composed of 7 beta subunits. The 19S regulator is composed of a base, which contains 6 ATPase subunits and 2 non-ATPase subunits,…	hsa03050 (Proteasome), hsa05169 (Epstein-Barr virus infection), GO:0000165 (MAPK cascade), GO:0000209 (protein polyubiquitination), GO:0002223 (stimulatory C-type lectin receptor signaling pathway), GO:0002479 (antigen processing and presentation of exogenous peptide antigen via MHC class I, TAP-dependent), GO:0006511 (ubiquitin-dependent protein catabolic process), GO:0006521 (regulation of cell…		0.535684	0.521304		-0.280274	-0.285882	-0.490832				427.373	80.249	23.7991	-0.901428	6.1962	60.7744	1.49202e-05	0.00169536	6.5084e-11	6.66814e-11	0.2	0.464103	0.00232594	-0.866025	-0.992178	0.0576689	0.000829458		101.87	100.84	57.0014	56.7725	48.9892
ENSG00000120697	ALG5	PC	ALG5, dolichyl-phosphate beta-glucosyltransferase	This gene encodes a member of the glycosyltransferase 2 family. The encoded protein participates in glucosylation of the oligomannose core in N-linked glycosylation of proteins. The addition of glucose residues to the oligomannose core is necessary to ensure substrate recognition, and therefore, effectual transfer of the oligomannose core to the nascent glycoproteins. Multiple transcript variants…	hsa00510 (N-Glycan biosynthesis), hsa01100 (Metabolic pathways), GO:0006486 (protein glycosylation), GO:0006487 (protein N-linked glycosylation), GO:0007368 (determination of left/right symmetry), GO:0018279 (protein N-linked glycosylation via asparagine), GO:0005789 (endoplasmic reticulum membrane), GO:0016020 (membrane), GO:0016021 (integral component of membrane), GO:0004576 (oligosaccharyl tr…		0.540087	0.430126		-0.294582	-0.348777	-0.326854				427.065	81.1491	15.681	-0.830126	6.27466	60.7077	1.49915e-05	0.00169536	1.82333e-10	1.8831e-10	0.2	0.464103	0.0506769	-0.866025	-0.992989	0.0576689	0.000703994		108.738	100.611	60.0919	57.8027	58.7184
ENSG00000164609	SLU7	PC	SLU7 homolog, splicing factor	Pre-mRNA splicing occurs in two sequential transesterification steps. The protein encoded by this gene is a splicing factor that has been found to be essential during the second catalytic step in the pre-mRNA splicing process. It associates with the spliceosome and contains a zinc knuckle motif that is found in other splicing factors and is involved in protein-nucleic acid and protein-protein int…	hsa03040 (Spliceosome), GO:0000375 (RNA splicing, via transesterification reactions), GO:0000380 (alternative mRNA splicing, via spliceosome), GO:0000389 (mRNA 3'-splice site recognition), GO:0000398 (mRNA splicing, via spliceosome), GO:0006369 (termination of RNA polymerase II transcription), GO:0006405 (RNA export from nucleus), GO:0006406 (mRNA export from nucleus), GO:0006886 (intracellular p…		0.825517	0.933012		-0.299457	-0.667092	-0.79198				426.114	48.3765	22.1166	-1.62504	4.18762	60.5023	1.52138e-05	0.00169536	9.88634e-12	1.14639e-11	0.2	0.464103	0.00200435	-0.866025	-0.988034	0.0576689	0.00156837		29.073	31.4767	12.2473	9.0424	8.12671
ENSG00000198888	MT-ND1	PC	mitochondrially encoded NADH:ubiquinone oxidoreductase core subunit 1		hsa00190 (Oxidative phosphorylation), hsa01100 (Metabolic pathways), hsa04714 (Thermogenesis), hsa04723 (Retrograde endocannabinoid signaling), hsa05012 (Parkinson disease), R-HSA-1428517 (Homo sapiens: The citric acid (TCA) cycle and respiratory electron transport), R-HSA-1430728 (Homo sapiens: Metabolism), R-HSA-163200 (Homo sapiens: Respiratory electron transport, ATP synthesis by chemiosmotic…		0.765733	0.65501		-0.781685	-0.431511	-0.207547				425.327	99.8402	20.9893	-1.16672	11.7096	60.3324	1.54007e-05	0.00169536	6.10589e-12	6.13943e-12	0.2	0.464103	0.00319014	-0.866025	-0.976333	0.0576689	0.00435512		5211.63	4826.47	1781.7	2271.7	2653.54
ENSG00000151327	FAM177A1	PC	family with sequence similarity 177 member A1				0.579924	0.550448		-0.378455	-0.407084	-0.344834				425.322	66.5377	44.2837	-0.991494	5.25317	60.3313	1.54019e-05	0.00169536	2.68338e-10	2.87044e-10	0.2	0.464103	0.00109292	-0.866025	-0.999164	0.0576689	2.90279e-05		54.5978	53.4532	27.1272	26.5549	27.814
ENSG00000005175	RPAP3	PC	RNA polymerase II associated protein 3	This gene encodes an RNA polymerase II-associated protein. The encoded protein may function in transcriptional regulation and may also regulate apoptosis. Alternatively spliced transcript variants have been described. [provided by RefSeq, Mar 2009].	GO:0097255 (R2TP complex), GO:0005515 (protein binding)		0.588627	0.700986		-0.279707	-0.442632	-0.567275				421.843	64.2581	55.5481	-1.13421	5.10942	59.5825	1.62591e-05	0.00176248	7.43641e-11	8.02593e-11	0.2	0.464103	0.00810586	-0.866025	-0.988655	0.0576689	0.00144819		48.8747	52.9953	25.8681	22.8921	20.8319
ENSG00000144744	UBA3	PC	ubiquitin like modifier activating enzyme 3	The modification of proteins with ubiquitin is an important cellular mechanism for targeting abnormal or short-lived proteins for degradation. Ubiquitination involves at least three classes of enzymes: ubiquitin-activating enzymes, or E1s, ubiquitin-conjugating enzymes, or E2s, and ubiquitin-protein ligases, or E3s. This gene encodes a member of the E1 ubiquitin-activating enzyme family. The enco…	hsa04120 (Ubiquitin mediated proteolysis), GO:0006464 (cellular protein modification process), GO:0006508 (proteolysis), GO:0007113 (endomitotic cell cycle), GO:0038061 (NIK/NF-kappaB signaling), GO:0045116 (protein neddylation), GO:0045892 (negative regulation of transcription, DNA-templated), GO:0051726 (regulation of cell cycle), GO:0005634 (nucleus), GO:0005829 (cytosol), GO:0005515 (protein …		0.670734	0.43688		-0.310303	-0.511155	-0.286156				421.481	83.0333	24.3039	-0.945538	6.44164	59.5048	1.63512e-05	0.00176248	4.08932e-11	4.14388e-11	0.2	0.464103	0.0836751	-0.866025	-0.969856	0.0576689	0.00625396		131.859	111.828	65.8149	57.0014	66.9595
ENSG00000255717	SNHG1	processed_transcript	small nucleolar RNA host gene 1				0.567025	0.419348		-0.459634	-0.330895	-0.195845				421.071	96.3072	14.9155	-0.824629	8.40684	59.4167	1.64565e-05	0.00176248	5.72247e-11	5.7244e-11	0.2	0.464103	0.0277146	-0.866025	-0.977303	0.0576689	0.00409075		482.681	435.523	235.904	258.109	283.634
ENSG00000169679	BUB1	PC	BUB1 mitotic checkpoint serine/threonine kinase	This gene encodes a serine/threonine-protein kinase that play a central role in mitosis. The encoded protein functions in part by phosphorylating members of the mitotic checkpoint complex and activating the spindle checkpoint. This protein also plays a role in inhibiting the activation of the anaphase promoting complex/cyclosome. This protein may also function in the DNA damage response. Mutation…	hsa04110 (Cell cycle), hsa04114 (Oocyte meiosis), hsa04914 (Progesterone-mediated oocyte maturation), GO:0006468 (protein phosphorylation), GO:0006915 (apoptotic process), GO:0007062 (sister chromatid cohesion), GO:0007063 (regulation of sister chromatid cohesion), GO:0007067 (mitotic nuclear division), GO:0007093 (mitotic cell cycle checkpoint), GO:0007094 (mitotic spindle assembly checkpoint), …		0.416868	0.858423		-0.409294	-0.394047	-0.47195				419.921	76.3291	59.7039	-1.11583	5.90304	59.1702	1.67555e-05	0.00177848	2.52234e-11	2.51383e-11	0.2	0.464103	0.177882	-0.866025	-0.936744	0.0576689	0.0189155		74.3995	101.756	41.0914	41.5492	39.26
ENSG00000210144	MT-TY	Mt_tRNA	mitochondrially encoded tRNA tyrosine				0.931196	0.931196		-0.79697	-0.345795	-0.719627				419.039	34.6904	0.143013	-1.86468	3.42751	57.8432	1.84815e-05	0.00184629	1.80573e-11	2.26167e-11	0.138641	0.464103	0.00275784	-0.888523	-0.993148	0.043925	0.000680186		18.6571	18.6571	4.23505	6.52426	4.57843
ENSG00000108654	DDX5	PC	DEAD-box helicase 5	DEAD box proteins, characterized by the conserved motif Asp-Glu-Ala-Asp (DEAD), are putative RNA helicases. They are implicated in a number of cellular processes involving alteration of RNA secondary structure, such as translation initiation, nuclear and mitochondrial splicing, and ribosome and spliceosome assembly. Based on their distribution patterns, some members of this family are believed to…	hsa03040 (Spliceosome), hsa05202 (Transcriptional misregulation in cancer), hsa05205 (Proteoglycans in cancer), GO:0000122 (negative regulation of transcription from RNA polymerase II promoter), GO:0000380 (alternative mRNA splicing, via spliceosome), GO:0000381 (regulation of alternative mRNA splicing, via spliceosome), GO:0000398 (mRNA splicing, via spliceosome), GO:0000956 (nuclear-transcribed…		0.365338	0.490965		-0.226631	-0.347901	-0.281771				417.324	97.712	22.1418	-0.716837	9.00536	58.6149	1.74531e-05	0.00179666	3.24033e-10	3.23295e-10	0.2	0.464103	0.0478324	-0.866025	-0.986351	0.0576689	0.00191036		642.125	700.729	425.336	390.883	409.312
ENSG00000113739	STC2	PC	stanniocalcin 2	This gene encodes a secreted, homodimeric glycoprotein that is expressed in a wide variety of tissues and may have autocrine or paracrine functions. The encoded protein has 10 of its 15 cysteine residues conserved among stanniocalcin family members and is phosphorylated by casein kinase 2 exclusively on its serine residues. Its C-terminus contains a cluster of histidine residues which may interac…	GO:0006874 (cellular calcium ion homeostasis), GO:0006979 (response to oxidative stress), GO:0007566 (embryo implantation), GO:0010629 (negative regulation of gene expression), GO:0030968 (endoplasmic reticulum unfolded protein response), GO:0033280 (response to vitamin D), GO:0040015 (negative regulation of multicellular organism growth), GO:0043434 (response to peptide hormone), GO:0046697 (dec…		0.539252	0.470498		-0.249275	-0.325825	-0.434651				417.14	79.9125	54.1095	-0.862933	6.17807	58.5757	1.75038e-05	0.00179666	2.11263e-10	2.17588e-10	0.2	0.464103	0.00235555	-0.866025	-0.992163	0.0576689	0.000831864		101.298	96.4904	57.8027	54.7122	50.5916
ENSG00000198727	MT-CYB	PC	mitochondrially encoded cytochrome b		hsa00190 (Oxidative phosphorylation), hsa01100 (Metabolic pathways), hsa04260 (Cardiac muscle contraction), hsa04714 (Thermogenesis), hsa04932 (Non-alcoholic fatty liver disease (NAFLD)), hsa05010 (Alzheimer disease), hsa05012 (Parkinson disease), hsa05016 (Huntington disease), R-HSA-1428517 (Homo sapiens: The citric acid (TCA) cycle and respiratory electron transport), R-HSA-1430728 (Homo sapien…		0.560102	0.55329		-0.54305	-0.347126	-0.223216				417.114	99.9243	32.5734	-0.922112	12.9322	58.5703	1.75107e-05	0.00179666	3.65793e-10	3.6397e-10	0.2	0.464103	0.00485411	-0.866025	-0.98756	0.0576689	0.00166241		10931.8	10880.3	5087.66	5828	6350.85
ENSG00000153140	CETN3	PC	centrin 3	The protein encoded by this gene contains four EF-hand calcium binding domains, and is a member of the centrin protein family. Centrins are evolutionarily conserved proteins similar to the CDC31 protein of S. cerevisiae. Yeast CDC31 is located at the centrosome of interphase and mitotic cells, where it plays a fundamental role in centrosome duplication and separation. Multiple forms of the protei…	GO:0007067 (mitotic nuclear division), GO:0007098 (centrosome cycle), GO:0051301 (cell division), GO:0005730 (nucleolus), GO:0005813 (centrosome), GO:0005814 (centriole), GO:0005509 (calcium ion binding), GO:0005515 (protein binding)		0.731112	0.489723		-0.231677	-0.40479	-0.584368				417.04	80.7705	26.8865	-1.0423	6.24099	58.5543	1.75314e-05	0.00179666	2.40731e-11	2.41756e-11	0.2	0.464103	0.0672153	-0.866025	-0.967089	0.0576689	0.00713156		118.352	99.8098	59.7485	52.7664	46.3566
ENSG00000150991	UBC	PC	ubiquitin C	This gene represents a ubiquitin gene, ubiquitin C. The encoded protein is a polyubiquitin precursor. Conjugation of ubiquitin monomers or polymers can lead to various effects within a cell, depending on the residues to which ubiquitin is conjugated. Ubiquitination has been associated with protein degradation, DNA repair, cell cycle regulation, kinase modification, endocytosis, and regulation of …	hsa03320 (PPAR signaling pathway), GO:0000086 (G2/M transition of mitotic cell cycle), GO:0000122 (negative regulation of transcription from RNA polymerase II promoter), GO:0000165 (MAPK cascade), GO:0000187 (activation of MAPK activity), GO:0000209 (protein polyubiquitination), GO:0000715 (nucleotide-excision repair, DNA damage recognition), GO:0000717 (nucleotide-excision repair, DNA duplex unw…		-0.493673	-0.484638		0.436224	0.372678	0.169409				416.217	96.9044	24.144	0.824228	8.6373	58.379	1.77601e-05	0.00180455	1.20437e-10	1.23165e-10	0.2	0.464103	0.0153685	0.866025	0.962656	0.0576689	0.00861409		271.272	272.989	518.622	496.187	430.716
ENSG00000136146	MED4	PC	mediator complex subunit 4	This gene encodes a component of the Mediator complex. The Mediator complex interacts with DNA-binding gene-specific transcription factors to modulate transcription by RNA polymerase II. Alternatively spliced transcript variants encoding multiple isoforms have been observed for this gene. [provided by RefSeq, Jul 2012].	hsa04919 (Thyroid hormone signaling pathway), GO:0006357 (regulation of transcription from RNA polymerase II promoter), GO:0006366 (transcription from RNA polymerase II promoter), GO:0006367 (transcription initiation from RNA polymerase II promoter), GO:0030518 (intracellular steroid hormone receptor signaling pathway), GO:0030521 (androgen receptor signaling pathway), GO:0045893 (positive regula…		0.605646	0.530783		-0.225216	-0.519684	-0.391529				415.113	75.6814	28.5943	-0.975083	5.85649	58.1438	1.80725e-05	0.00182073	1.02509e-10	1.04545e-10	0.2	0.464103	0.00146308	-0.866025	-0.987425	0.0576689	0.00168952		84.0142	79.6647	46.3566	37.4287	41.0914
ENSG00000275197	AC092794.2	antisense					0.662686	1.31261		-0.680322	-0.680322	-0.614654				414.095	3.24697	5.45133	-3.56117	1.551	56.8099	1.99751e-05	0.00197886	2.09276e-12	4.47343e-12	0.138641	0.464103	0.198059	-0.888523	-0.923384	0.043925	0.0251628		4.23505	7.78333	0.457843	0.457843	0.572304
ENSG00000166200	COPS2	PC	COP9 signalosome subunit 2		GO:0000122 (negative regulation of transcription from RNA polymerase II promoter), GO:0000338 (protein deneddylation), GO:0000715 (nucleotide-excision repair, DNA damage recognition), GO:0006283 (transcription-coupled nucleotide-excision repair), GO:0006366 (transcription from RNA polymerase II promoter), GO:0007165 (signal transduction), GO:0008283 (cell proliferation), GO:0022008 (neurogenesis)…		0.4687	0.672207		-0.451981	-0.293432	-0.395493				406.98	69.709	61.4285	-0.996576	5.45337	56.4224	2.05721e-05	0.00202117	3.96667e-10	4.19885e-10	0.2	0.464103	0.0780268	-0.866025	-0.979942	0.0576689	0.00339981		57.6882	66.7306	29.5309	33.1936	30.7899
ENSG00000076043	REXO2	PC	RNA exonuclease 2	This gene encodes a 3_-to-5_ exonuclease specific for small (primarily 5 nucleotides or less in length) single-stranded RNA and DNA oligomers. This protein may have a role in DNA repair, replication, and recombination, and in RNA processing and degradation. It may also be involved in resistance of human cells to UV-C-induced cell death through its role in the DNA repair process. [provided by RefS…	hsa03008 (Ribosome biogenesis in eukaryotes), GO:0006139 (nucleobase-containing compound metabolic process), GO:0009117 (nucleotide metabolic process), GO:0090305 (nucleic acid phosphodiester bond hydrolysis), GO:0005634 (nucleus), GO:0005730 (nucleolus), GO:0005739 (mitochondrion), GO:0005758 (mitochondrial intermembrane space), GO:0005759 (mitochondrial matrix), GO:0005925 (focal adhesion), GO:…		0.67809	0.368916		-0.297584	-0.309493	-0.439929				405.984	88.1645	10.8101	-0.893464	6.95401	56.2129	2.0904e-05	0.00203694	1.26742e-10	1.28082e-10	0.2	0.464103	0.138831	-0.866025	-0.954315	0.0576689	0.011641		189.661	152.691	95.4602	94.659	86.3034
ENSG00000211460	TSN	PC	translin	This gene encodes a DNA-binding protein which specifically recognizes conserved target sequences at the breakpoint junction of chromosomal translocations. Translin polypeptides form a multimeric structure that is responsible for its DNA-binding activity. Recombination-associated motifs and translin-binding sites are present at recombination hotspots and may serve as indicators of breakpoints in g…	GO:0006310 (DNA recombination), GO:0016070 (RNA metabolic process), GO:0031047 (gene silencing by RNA), GO:0090305 (nucleic acid phosphodiester bond hydrolysis), GO:0005634 (nucleus), GO:0005829 (cytosol), GO:0003677 (DNA binding), GO:0003697 (single-stranded DNA binding), GO:0003729 (mRNA binding), GO:0004519 (endonuclease activity), GO:0005515 (protein binding), GO:0032403 (protein complex bind…		0.37718	0.67035		-0.294221	-0.33517	-0.418139				403.924	83.1931	53.7814	-0.899439	6.4545	55.7805	2.16093e-05	0.00206568	2.21157e-10	2.25063e-10	0.2	0.464103	0.133578	-0.866025	-0.959373	0.0576689	0.00976987		108.738	133.69	67.5318	65.586	61.8088
ENSG00000210194	MT-TE	Mt_tRNA	mitochondrially encoded tRNA glutamic acid				1.50952	0.916673		-0.983162	-0.328562	-1.11447				403.908	43.6154	0.210314	-2.34699	3.9195	55.7769	2.16151e-05	0.00206568	3.41679e-12	4.31636e-12	0.2	0.464103	0.153843	-0.866025	-0.9372	0.0576689	0.018713		35.025	22.5488	4.57843	8.35563	4.00613
ENSG00000196305	IARS	PC	isoleucyl-tRNA synthetase	Aminoacyl-tRNA synthetases catalyze the aminoacylation of tRNA by their cognate amino acid. Because of their central role in linking amino acids with nucleotide triplets contained in tRNAS, aminoacyl-tRNA synthetases are thought to be among the first proteins that appeared in evolution. Isoleucine-tRNA synthetase belongs to the class-I aminoacyl-tRNA synthetase family and has been identified as a…	hsa00970 (Aminoacyl-tRNA biosynthesis), GO:0001649 (osteoblast differentiation), GO:0006418 (tRNA aminoacylation for protein translation), GO:0006428 (isoleucyl-tRNA aminoacylation), GO:0006450 (regulation of translational fidelity), GO:0005737 (cytoplasm), GO:0005829 (cytosol), GO:0016020 (membrane), GO:0017101 (aminoacyl-tRNA synthetase multienzyme complex), GO:0070062 (extracellular vesicular …		0.651716	0.490375		-0.525501	-0.194535	-0.422055				403.607	80.2238	70.3037	-0.973205	6.1953	55.714	2.17202e-05	0.00206568	1.15497e-10	1.17095e-10	0.2	0.464103	0.0232207	-0.866025	-0.975873	0.0576689	0.00448246		109.424	97.635	47.2723	59.9774	50.935
ENSG00000173726	TOMM20	PC	translocase of outer mitochondrial membrane 20		GO:0006626 (protein targeting to mitochondrion), GO:0016031 (tRNA import into mitochondrion), GO:0016236 (macroautophagy), GO:0016579 (protein deubiquitination), GO:0030150 (protein import into mitochondrial matrix), GO:0070096 (mitochondrial outer membrane translocase complex assembly), GO:0005739 (mitochondrion), GO:0005741 (mitochondrial outer membrane), GO:0005742 (mitochondrial outer membran…		0.503853	0.65796		-0.308803	-0.261442	-0.591568				400.869	78.1965	46.5382	-0.992438	6.03984	55.1414	2.27047e-05	0.00214217	1.36192e-10	1.38064e-10	0.2	0.464103	0.0197199	-0.866025	-0.977597	0.0576689	0.00401163		88.3637	98.5507	49.447	51.1639	40.2902
ENSG00000103769	RAB11A	PC	RAB11A, member RAS oncogene family	The protein encoded by this gene belongs to the Rab family of the small GTPase superfamily. It is associated with both constitutive and regulated secretory pathways, and may be involved in protein transport. Two transcript variants encoding different isoforms have been found for this gene. [provided by RefSeq, May 2011].	hsa04144 (Endocytosis), hsa04961 (Endocrine and other factor-regulated calcium reabsorption), hsa04962 (Vasopressin-regulated water reabsorption), hsa04972 (Pancreatic secretion), GO:0000910 (cytokinesis), GO:0003091 (renal water homeostasis), GO:0007080 (mitotic metaphase plate congression), GO:0010634 (positive regulation of epithelial cell migration), GO:0010796 (regulation of multivesicular b…		0.513227	0.563406		-0.577037	-0.290279	-0.209317				398.579	89.788	35.358	-0.901307	7.16571	54.6641	2.35666e-05	0.00220598	1.23047e-10	1.24009e-10	0.2	0.464103	0.0032395	-0.866025	-0.980179	0.0576689	0.00333987		195.27	202.252	90.6529	111.027	117.551
ENSG00000108829	LRRC59	PC	leucine rich repeat containing 59		GO:0005635 (nuclear envelope), GO:0005783 (endoplasmic reticulum), GO:0005789 (endoplasmic reticulum membrane), GO:0016020 (membrane), GO:0016021 (integral component of membrane), GO:0031090 (organelle membrane), GO:0042645 (mitochondrial nucleoid), GO:0003723 (RNA binding), GO:0045296 (cadherin binding)		0.533485	0.343455		-0.371124	-0.252607	-0.253209				398.038	96.2651	59.4936	-0.737142	8.39227	54.5515	2.37757e-05	0.00220817	7.16996e-10	7.17934e-10	0.2	0.464103	0.0885025	-0.866025	-0.974177	0.0576689	0.00496202		471.006	412.631	250.669	272.302	272.188
ENSG00000041357	PSMA4	PC	proteasome subunit alpha 4	The proteasome is a multicatalytic proteinase complex with a highly ordered ring-shaped 20S core structure. The core structure is composed of 4 rings of 28 non-identical subunits; 2 rings are composed of 7 alpha subunits and 2 rings are composed of 7 beta subunits. Proteasomes are distributed throughout eukaryotic cells at a high concentration and cleave peptides in an ATP/ubiquitin-dependent pro…	hsa03050 (Proteasome), GO:0000165 (MAPK cascade), GO:0000209 (protein polyubiquitination), GO:0002223 (stimulatory C-type lectin receptor signaling pathway), GO:0002479 (antigen processing and presentation of exogenous peptide antigen via MHC class I, TAP-dependent), GO:0006521 (regulation of cellular amino acid metabolic process), GO:0010972 (negative regulation of G2/M transition of mitotic cel…		0.652168	0.336451		-0.342036	-0.247795	-0.398788				392.954	94.1117	30.0244	-0.838158	7.87039	53.498	2.58431e-05	0.00237161	3.15929e-10	3.16958e-10	0.2	0.464103	0.147808	-0.866025	-0.948732	0.0576689	0.0138274		352.654	282.947	176.041	188.059	169.173
ENSG00000129562	DAD1	PC	defender against cell death 1	DAD1, the defender against apoptotic cell death, was initially identified as a negative regulator of programmed cell death in the temperature sensitive tsBN7 cell line. The DAD1 protein disappeared in temperature-sensitive cells following a shift to the nonpermissive temperature, suggesting that loss of the DAD1 protein triggered apoptosis. DAD1 is believed to be a tightly associated subunit of o…	hsa00510 (N-Glycan biosynthesis), hsa01100 (Metabolic pathways), hsa04141 (Protein processing in endoplasmic reticulum), GO:0001824 (blastocyst development), GO:0006486 (protein glycosylation), GO:0006487 (protein N-linked glycosylation), GO:0006915 (apoptotic process), GO:0007584 (response to nutrient), GO:0018279 (protein N-linked glycosylation via asparagine), GO:0042493 (response to drug), GO…		0.468767	0.366009		-0.24998	-0.238085	-0.346712				392.74	93.035	4.33246	-0.702548	7.65363	53.4538	2.59345e-05	0.00237161	1.81692e-09	1.83658e-09	0.2	0.464103	0.0320064	-0.866025	-0.989344	0.0576689	0.00131832		271.043	252.271	163.908	165.281	153.148
ENSG00000105372	RPS19	PC	ribosomal protein S19	Ribosomes, the organelles that catalyze protein synthesis, consist of a small 40S subunit and a large 60S subunit. Together these subunits are composed of 4 RNA species and approximately 80 structurally distinct proteins. This gene encodes a ribosomal protein that is a component of the 40S subunit. The protein belongs to the S19E family of ribosomal proteins. It is located in the cytoplasm. Mutat…	hsa03010 (Ribosome), GO:0000028 (ribosomal small subunit assembly), GO:0000184 (nuclear-transcribed mRNA catabolic process, nonsense-mediated decay), GO:0000462 (maturation of SSU-rRNA from tricistronic rRNA transcript (SSU-rRNA, 5.8S rRNA, LSU-rRNA)), GO:0002548 (monocyte chemotaxis), GO:0006364 (rRNA processing), GO:0006412 (translation), GO:0006413 (translational initiation), GO:0006614 (SRP-d…		-0.393631	-0.424418		0.302484	0.273376	0.242188				388.611	99.6719	12.4674	0.682527	11.0532	52.6041	2.77686e-05	0.00250977	8.86782e-09	9.28492e-09	0.2	0.464103	0.000146857	0.866025	0.997188	0.0576689	0.000178952		1575.55	1542.24	2553.85	2502.8	2449.23
ENSG00000137575	SDCBP	PC	syndecan binding protein	The protein encoded by this gene was initially identified as a molecule linking syndecan-mediated signaling to the cytoskeleton. The syntenin protein contains tandemly repeated PDZ domains that bind the cytoplasmic, C-terminal domains of a variety of transmembrane proteins. This protein may also affect cytoskeletal-membrane organization, cell adhesion, protein trafficking, and the activation of t…	GO:0002091 (negative regulation of receptor internalization), GO:0006612 (protein targeting to membrane), GO:0006930 (substrate-dependent cell migration, cell extension), GO:0007268 (synaptic transmission), GO:0007346 (regulation of mitotic cell cycle), GO:0008284 (positive regulation of cell proliferation), GO:0010718 (positive regulation of epithelial to mesenchymal transition), GO:0010862 (pos…		0.396139	0.571905		-0.462795	-0.31275	-0.192499				388.397	92.4125	48.7003	-0.813744	7.5363	52.5602	2.78676e-05	0.00250977	5.5018e-10	5.54206e-10	0.2	0.464103	0.0452167	-0.866025	-0.971427	0.0576689	0.00577291		234.759	265.434	128.539	142.847	155.438
ENSG00000138180	CEP55	PC	centrosomal protein 55		GO:0000281 (mitotic cytokinesis), GO:0000920 (cytokinetic cell separation), GO:0045184 (establishment of protein localization), GO:0005813 (centrosome), GO:0005814 (centriole), GO:0005815 (microtubule organizing center), GO:0005886 (plasma membrane), GO:0016020 (membrane), GO:0030496 (midbody), GO:0032154 (cleavage furrow), GO:0045171 (intercellular bridge), GO:0005515 (protein binding)		0.418631	1.00999		-0.525045	-0.549837	-0.353741				385.796	73.2756	45.8905	-1.26685	5.68671	52.0276	2.91021e-05	0.00259831	1.03382e-10	1.09176e-10	0.2	0.464103	0.214351	-0.866025	-0.907257	0.0576689	0.0334287		62.61	95.3458	31.5912	31.0189	35.8262
ENSG00000132467	UTP3	PC	UTP3, small subunit processome component		GO:0000462 (maturation of SSU-rRNA from tricistronic rRNA transcript (SSU-rRNA, 5.8S rRNA, LSU-rRNA)), GO:0006364 (rRNA processing), GO:0007420 (brain development), GO:0016569 (covalent chromatin modification), GO:0005634 (nucleus), GO:0005654 (nucleoplasm), GO:0005730 (nucleolus), GO:0032040 (small-subunit processome), GO:0003723 (RNA binding), GO:0005515 (protein binding), R-HSA-6790901 (Homo s…		0.931293	0.402331		-0.383197	-0.418879	-0.531547				385.416	73.2167	74.9474	-1.17928	5.68285	51.9498	2.92878e-05	0.00259831	1.9894e-10	2.09333e-10	0.2	0.464103	0.202869	-0.866025	-0.917417	0.0576689	0.0281331		91.2252	62.61	35.4828	34.5671	31.8201
ENSG00000104131	EIF3J	PC	eukaryotic translation initiation factor 3 subunit J	This gene encodes a core subunit of the eukaryotic initiation factor 3 complex, which participates in the initiation of translation by aiding in the recruitment of protein and mRNA components to the 40S ribosome. There are pseudogenes for this gene on chromosomes 1, 3, and 9. Alternative splicing results in multiple transcript variants encoding different isoforms. [provided by RefSeq, Sep 2013].	hsa03013 (RNA transport), GO:0006413 (translational initiation), GO:0005829 (cytosol), GO:0005852 (eukaryotic translation initiation factor 3 complex), GO:0003743 (translation initiation factor activity), GO:0005515 (protein binding), R-HSA-156827 (Homo sapiens: L13a-mediated translational silencing of Ceruloplasmin expression), R-HSA-392499 (Homo sapiens: Metabolism of proteins), R-HSA-72613 (Ho…		0.367735	0.653531		-0.439529	-0.378538	-0.203198				383.265	90.5535	27.2483	-0.865723	7.25403	51.5111	3.03625e-05	0.00266589	5.05928e-10	5.09965e-10	0.2	0.464103	0.117316	-0.866025	-0.953296	0.0576689	0.0120308		188.173	229.837	106.677	111.37	126.021
ENSG00000165629	ATP5F1C	PC	ATP synthase F1 subunit gamma	This gene encodes a subunit of mitochondrial ATP synthase. Mitochondrial ATP synthase catalyzes ATP synthesis, utilizing an electrochemical gradient of protons across the inner membrane during oxidative phosphorylation. ATP synthase is composed of two linked multi-subunit complexes: the soluble catalytic core, F1, and the membrane-spanning component, Fo, comprising the proton channel. The catalyt…	hsa00190 (Oxidative phosphorylation), hsa01100 (Metabolic pathways), hsa04714 (Thermogenesis), hsa05010 (Alzheimer disease), hsa05012 (Parkinson disease), hsa05016 (Huntington disease), GO:0006119 (oxidative phosphorylation), GO:0006754 (ATP biosynthetic process), GO:0042776 (mitochondrial ATP synthesis coupled proton transport), GO:0099132 (NA), GO:0000275 (mitochondrial proton-transporting ATP …		0.570984	0.311517		-0.299542	-0.314506	-0.268453				383	94.5912	9.75856	-0.746903	7.98014	51.4571	3.0498e-05	0.00266589	1.61444e-09	1.62137e-09	0.2	0.464103	0.138623	-0.866025	-0.960451	0.0576689	0.00938508		363.069	302.978	197.674	195.613	202.023
ENSG00000174695	TMEM167A	PC	transmembrane protein 167A		GO:0009306 (protein secretion), GO:0046907 (intracellular transport), GO:0000139 (Golgi membrane), GO:0012505 (endomembrane system), GO:0016021 (integral component of membrane)		0.535134	0.770533		-0.391252	-0.452017	-0.462398				380.829	52.7843	63.4727	-1.19607	4.43974	51.0159	3.1633e-05	0.00271531	3.60785e-09	3.97803e-09	0.2	0.464103	0.0946237	-0.866025	-0.980536	0.0576689	0.00325028		29.6453	35.2539	14.651	13.9642	13.8497
ENSG00000089063	TMEM230	PC	transmembrane protein 230		GO:0048489 (synaptic vesicle transport), GO:0005769 (early endosome), GO:0005770 (late endosome), GO:0005776 (autophagic vacuole), GO:0005783 (endoplasmic reticulum), GO:0005802 (trans-Golgi network), GO:0008021 (synaptic vesicle), GO:0016021 (integral component of membrane), GO:0030054 (cell junction), GO:0055037 (recycling endosome)		0.383018	0.671339		-0.416651	-0.25017	-0.387536				379.759	79.004	46.37	-0.909508	6.10989	50.7988	3.221e-05	0.00271531	1.28649e-09	1.31492e-09	0.2	0.464103	0.125193	-0.866025	-0.958755	0.0576689	0.00999282		85.96	105.418	48.5313	54.7122	49.5615
ENSG00000139684	ESD	PC	esterase D	This gene encodes a serine hydrolase that belongs to the esterase D family. The encoded enzyme is active toward numerous substrates including O-acetylated sialic acids, and it may be involved in the recycling of sialic acids. This gene is used as a genetic marker for retinoblastoma and Wilson_s disease. [provided by RefSeq, Feb 2009]. Publication Note: This RefSeq record includes a subset of the …	hsa01200 (Carbon metabolism), GO:0008150 (biological_process), GO:0046294 (formaldehyde catabolic process), GO:1901687 (glutathione derivative biosynthetic process), GO:0005788 (endoplasmic reticulum lumen), GO:0031410 (cytoplasmic vesicle), GO:0070062 (extracellular vesicular exosome), GO:0005515 (protein binding), GO:0016788 (hydrolase activity, acting on ester bonds), GO:0018738 (S-formylgluta…		0.420282	0.56837		-0.509545	-0.302129	-0.176978				379.646	94.6332	39.8587	-0.825727	7.98549	50.7758	3.2272e-05	0.00271531	7.08183e-10	7.09901e-10	0.2	0.464103	0.0192511	-0.866025	-0.970922	0.0576689	0.00592632		325.183	360.551	169.745	196.3	214.27
ENSG00000124614	RPS10	PC	ribosomal protein S10	Ribosomes, the organelles that catalyze protein synthesis, consist of a small 40S subunit and a large 60S subunit. Together these subunits are composed of 4 RNA species and approximately 80 structurally distinct proteins. This gene encodes a ribosomal protein that is a component of the 40S subunit. The protein belongs to the S10E family of ribosomal proteins. It is located in the cytoplasm. Varia…	hsa03010 (Ribosome), GO:0000028 (ribosomal small subunit assembly), GO:0000184 (nuclear-transcribed mRNA catabolic process, nonsense-mediated decay), GO:0006364 (rRNA processing), GO:0006412 (translation), GO:0006413 (translational initiation), GO:0006614 (SRP-dependent cotranslational protein targeting to membrane), GO:0019083 (viral transcription), GO:0005654 (nucleoplasm), GO:0005730 (nucleolu…		-0.430739	-0.419059		0.375146	0.169873	0.30478				379.554	97.0727	10.1455	0.714422	8.67431	50.7572	3.23222e-05	0.00271531	3.58724e-09	3.67589e-09	0.2	0.464103	0.0108579	0.866025	0.972959	0.0576689	0.0053162		293.706	296.11	514.959	446.397	490.35
ENSG00000120992	LYPLA1	PC	lysophospholipase I	This gene encodes a member of the alpha/beta hydrolase superfamily. The encoded protein functions as a homodimer, exhibiting both depalmitoylating as well as lysophospholipase activity, and may be involved in Ras localization and signaling. Alternate splicing results in multiple transcript variants. Pseudogenes of this gene have been defined on chromosomes 4, 6, and 7. [provided by RefSeq, Jul 20…	hsa00564 (Glycerophospholipid metabolism), hsa05231 (Choline metabolism in cancer), GO:0002084 (protein depalmitoylation), GO:0006631 (fatty acid metabolic process), GO:0042997 (negative regulation of Golgi to plasma membrane protein transport), GO:0050999 (regulation of nitric-oxide synthase activity), GO:0005737 (cytoplasm), GO:0005739 (mitochondrion), GO:0005829 (cytosol), GO:0070062 (extracel…		0.821628	0.862102		-0.901296	-0.543168	-0.239267				379.538	55.3415	26.9202	-1.50129	4.58304	50.754	3.23307e-05	0.00271531	1.49673e-10	1.66825e-10	0.2	0.464103	0.00419015	-0.866025	-0.98334	0.0576689	0.00257487		38.2299	39.3745	10.187	13.6208	17.2836
ENSG00000270069	MIR222HG	lincRNA	MIR222 host gene				0.53244	0.791818		-0.484942	-0.334401	-0.504914				379.35	54.7527	56.7763	-1.20496	4.54535	50.7159	3.24338e-05	0.00271531	2.66528e-09	2.92402e-09	0.2	0.464103	0.0951317	-0.866025	-0.974948	0.0576689	0.00474207		31.7056	38.3443	14.651	16.4823	14.4221
ENSG00000082213	C5orf22	PC	chromosome 5 open reading frame 22		GO:0005515 (protein binding)		0.585642	0.783363		-0.481507	-0.494626	-0.392872				377.565	47.0138	49.5331	-1.28078	4.11515	50.3548	3.34302e-05	0.00277915	4.7202e-09	5.30492e-09	0.2	0.464103	0.073684	-0.866025	-0.986405	0.0576689	0.00189886		24.4946	28.3863	10.6448	10.5304	11.4461
ENSG00000142871	CYR61	PC	cysteine rich angiogenic inducer 61	The secreted protein encoded by this gene is growth factor-inducible and promotes the adhesion of endothelial cells. The encoded protein interacts with several integrins and with heparan sulfate proteoglycan. This protein also plays a role in cell proliferation, differentiation, angiogenesis, apoptosis, and extracellular matrix formation. [provided by RefSeq, Sep 2011]. Publication Note: This Ref…	GO:0001558 (regulation of cell growth), GO:0001649 (osteoblast differentiation), GO:0001934 (positive regulation of protein phosphorylation), GO:0002041 (intussusceptive angiogenesis), GO:0003181 (atrioventricular valve morphogenesis), GO:0003278 (apoptotic process involved in heart morphogenesis), GO:0003281 (ventricular septum development), GO:0006935 (chemotaxis), GO:0008283 (cell proliferatio…		-0.383407	-0.565505		0.459175	0.2472	0.242537				376.595	99.4532	49.0284	0.792564	10.6529	50.159	3.39857e-05	0.00279686	2.80354e-09	2.96306e-09	0.2	0.464103	0.00660187	0.866025	0.960281	0.0576689	0.00944557		1189.13	1047.89	2134.01	1842.13	1836.18
ENSG00000175582	RAB6A	PC	RAB6A, member RAS oncogene family	This gene encodes a member of the RAB family, which belongs to the small GTPase superfamily. GTPases of the RAB family bind to various effectors to regulate the targeting and fusion of transport carriers to acceptor compartments. This protein is located at the Golgi apparatus, which regulates trafficking in both a retrograde (from early endosomes and Golgi to the endoplasmic reticulum) and an ant…	GO:0000042 (protein targeting to Golgi), GO:0006890 (retrograde vesicle-mediated transport, Golgi to ER), GO:0016032 (viral process), GO:0018125 (peptidyl-cysteine methylation), GO:0019882 (antigen processing and presentation), GO:0034067 (protein localization to Golgi apparatus), GO:0034498 (early endosome to Golgi transport), GO:0043312 (neutrophil degranulation), GO:0061024 (membrane organizat…		0.436212	0.419239		-0.282489	-0.262433	-0.310529				376.374	81.7715	45.2343	-0.730299	6.32578	50.1145	3.41138e-05	0.00279686	8.56886e-09	8.88787e-09	0.2	0.464103	5.73541e-05	-0.866025	-0.99924	0.0576689	2.51304e-05		105.647	104.388	63.4112	64.3269	62.1522
ENSG00000170498	KISS1	PC	KiSS-1 metastasis suppressor	This gene is a metastasis suppressor gene that suppresses metastases of melanomas and breast carcinomas without affecting tumorigenicity. The encoded protein may inhibit chemotaxis and invasion and thereby attenuate metastasis in malignant melanomas. Studies suggest a putative role in the regulation of events downstream of cell-matrix adhesion, perhaps involving cytoskeletal reorganization. A pro…	GO:0007010 (cytoskeleton organization), GO:0008285 (negative regulation of cell proliferation), GO:0033686 (positive regulation of luteinizing hormone secretion), GO:0043410 (positive regulation of MAPK cascade), GO:0046697 (decidualization), GO:0050806 (positive regulation of synaptic transmission), GO:0051482 (positive regulation of cytosolic calcium ion concentration involved in phospholipase …		-0.344808	-0.475585		0.290497	0.321829	0.208067				373.401	96.6857	5.77101	0.686955	8.53256	49.5163	3.58894e-05	0.00291922	6.8598e-09	7.00412e-09	0.2	0.464103	0.00568926	0.866025	0.986073	0.0576689	0.00196879		283.29	258.567	441.132	450.861	416.523
ENSG00000145604	SKP2	PC	S-phase kinase associated protein 2	This gene encodes a member of the F-box protein family which is characterized by an approximately 40 amino acid motif, the F-box. The F-box proteins constitute one of the four subunits of ubiquitin protein ligase complex called SCFs (SKP1-cullin-F-box), which function in phosphorylation-dependent ubiquitination. The F-box proteins are divided into 3 classes: Fbws containing WD-40 domains, Fbls co…	hsa04068 (FoxO signaling pathway), hsa04110 (Cell cycle), hsa04120 (Ubiquitin mediated proteolysis), hsa04150 (mTOR signaling pathway), hsa05168 (Herpes simplex infection), hsa05169 (Epstein-Barr virus infection), hsa05200 (Pathways in cancer), hsa05203 (Viral carcinogenesis), hsa05222 (Small cell lung cancer), GO:0000082 (G1/S transition of mitotic cell cycle), GO:0000086 (G2/M transition of mit…		-0.598479	-0.764527		0.78084	0.250101	0.332066				373.064	86.2635	60.217	1.17862	6.74144	49.4485	3.60974e-05	0.00291922	1.80511e-10	1.74474e-10	0.2	0.464103	0.0390063	0.866025	0.898261	0.0576689	0.038355		64.3269	57.1159	170.546	117.437	124.419
ENSG00000197372	ZNF675	PC	zinc finger protein 675		GO:0000122 (negative regulation of transcription from RNA polymerase II promoter), GO:0006351 (transcription, DNA-templated), GO:0007249 (I-kappaB kinase/NF-kappaB signaling), GO:0010804 (negative regulation of tumor necrosis factor-mediated signaling pathway), GO:0019221 (cytokine-mediated signaling pathway), GO:0032088 (negative regulation of NF-kappaB transcription factor activity), GO:0043508…		0.591963	1.20278		-0.432185	-0.845045	-0.517514				371.695	46.5259	41.8861	-1.71566	4.08433	49.174	3.69552e-05	0.0029684	4.69527e-10	5.40765e-10	0.2	0.464103	0.191638	-0.866025	-0.920012	0.0576689	0.0268281		22.3198	35.1394	9.95808	6.9821	9.27132
ENSG00000070367	EXOC5	PC	exocyst complex component 5	The protein encoded by this gene is a component of the exocyst complex, a multiple protein complex essential for targeting exocytic vesicles to specific docking sites on the plasma membrane. Though best characterized in yeast, the component proteins and functions of exocyst complex have been demonstrated to be highly conserved in higher eukaryotes. At least eight components of the exocyst complex…	GO:0006887 (exocytosis), GO:0006892 (post-Golgi vesicle-mediated transport), GO:0006893 (Golgi to plasma membrane transport), GO:0015031 (protein transport), GO:0048278 (vesicle docking), GO:0000145 (exocyst), GO:0005737 (cytoplasm), GO:0005829 (cytosol), GO:0005515 (protein binding), GO:0017160 (Ral GTPase binding), GO:0047485 (protein N-terminus binding), R-HSA-1445148 (Homo sapiens: Translocat…		0.665864	1.01738		-0.816108	-0.45817	-0.408967				370.358	40.8647	88.4327	-1.62767	3.76774	48.9064	3.78151e-05	0.00301709	9.51352e-10	1.11358e-09	0.2	0.464103	0.103915	-0.866025	-0.963716	0.0576689	0.00825158		19.5728	25.5247	5.72304	7.89779	8.24117
ENSG00000071082	RPL31	PC	ribosomal protein L31	Ribosomes, the organelles that catalyze protein synthesis, consist of a small 40S subunit and a large 60S subunit. Together these subunits are composed of 4 RNA species and approximately 80 structurally distinct proteins. This gene encodes a ribosomal protein that is a component of the 60S subunit. The protein belongs to the L31E family of ribosomal proteins. It is located in the cytoplasm. Highe…	hsa03010 (Ribosome), GO:0000184 (nuclear-transcribed mRNA catabolic process, nonsense-mediated decay), GO:0006364 (rRNA processing), GO:0006412 (translation), GO:0006413 (translational initiation), GO:0006614 (SRP-dependent cotranslational protein targeting to membrane), GO:0019083 (viral transcription), GO:0005829 (cytosol), GO:0005925 (focal adhesion), GO:0016020 (membrane), GO:0022625 (cytosol…		-0.337489	-0.605666		0.414529	0.275151	0.253475				369.037	99.3186	23.1766	0.782785	10.4088	48.6426	3.86866e-05	0.00306604	3.89232e-09	4.10523e-09	0.2	0.464103	0.0268146	0.866025	0.969564	0.0576689	0.00634472		1037.13	860.859	1748.04	1586.88	1563.19
ENSG00000163029	SMC6	PC	structural maintenance of chromosomes 6		GO:0000722 (telomere maintenance via recombination), GO:0000724 (double-strand break repair via homologous recombination), GO:0006974 (cellular response to DNA damage stimulus), GO:0051984 (positive regulation of chromosome segregation), GO:0090398 (cellular senescence), GO:0000781 (chromosome, telomeric region), GO:0000803 (sex chromosome), GO:0005622 (intracellular), GO:0005634 (nucleus), GO:00…		0.782675	0.663687		-0.390305	-0.266968	-0.789091				367.985	60.4812	82.2916	-1.27339	4.88415	48.4329	3.93962e-05	0.0031016	7.7176e-10	8.37188e-10	0.2	0.464103	0.0034946	-0.866025	-0.979656	0.0576689	0.00347269		47.1578	43.2662	19.8017	21.7475	14.5365
ENSG00000168724	DNAJC21	PC	DnaJ heat shock protein family (Hsp40) member C21		GO:0006457 (protein folding), GO:0005730 (nucleolus), GO:0005840 (ribosome), GO:0003723 (RNA binding), GO:0005515 (protein binding), GO:0008270 (zinc ion binding)		0.93319	0.427804		-0.439857	-0.570492	-0.350645				366.796	64.7964	78.1778	-1.22051	5.14439	48.1961	4.02167e-05	0.00314537	1.29352e-09	1.38187e-09	0.2	0.464103	0.190353	-0.866025	-0.923788	0.0576689	0.0249655		63.0679	43.8385	23.1211	20.9463	24.7235
ENSG00000122483	CCDC18	PC	coiled-coil domain containing 18				0.850072	0.644866		-0.470112	-0.533796	-0.491029				364.653	33.6221	75.6204	-1.50965	3.36798	47.7707	4.17431e-05	0.00323445	5.63905e-09	6.73751e-09	0.2	0.464103	0.076129	-0.866025	-0.9875	0.0576689	0.00167439		17.8559	15.2233	5.95196	5.60858	5.8375
ENSG00000060718	COL11A1	PC	collagen type XI alpha 1 chain	This gene encodes one of the two alpha chains of type XI collagen, a minor fibrillar collagen. Type XI collagen is a heterotrimer but the third alpha chain is a post-translationally modified alpha 1 type II chain. Mutations in this gene are associated with type II Stickler syndrome and with Marshall syndrome. A single-nucleotide polymorphism in this gene is also associated with susceptibility to …	hsa04974 (Protein digestion and absorption), GO:0001502 (cartilage condensation), GO:0001503 (ossification), GO:0002063 (chondrocyte development), GO:0006029 (proteoglycan metabolic process), GO:0007601 (visual perception), GO:0007605 (sensory perception of sound), GO:0030198 (extracellular matrix organization), GO:0030199 (collagen fibril organization), GO:0030574 (collagen catabolic process), G…		0.47796	0.94796		-0.4969	-0.420935	-0.508086				364.438	52.1282	91.293	-1.32603	4.40274	47.7281	4.18998e-05	0.00323445	4.28984e-09	4.73088e-09	0.2	0.464103	0.175865	-0.866025	-0.938095	0.0576689	0.0183167		27.1272	38.3443	12.8196	13.6208	12.7051
ENSG00000162086	ZNF75A	PC	zinc finger protein 75a		GO:0006351 (transcription, DNA-templated), GO:0006355 (regulation of transcription, DNA-templated), GO:0008150 (biological_process), GO:0005634 (nucleus), GO:0003674 (molecular_function), GO:0003677 (DNA binding), GO:0046872 (metal ion binding), R-HSA-212436 (Homo sapiens: Generic Transcription Pathway), R-HSA-74160 (Homo sapiens: Gene Expression)		0.902339	0.671871		-0.556697	-0.750391	-0.267122				363.639	47.426	52.4943	-1.4601	4.13971	47.5699	4.24877e-05	0.00325867	1.70841e-09	1.93044e-09	0.2	0.464103	0.0419252	-0.866025	-0.974735	0.0576689	0.00480253		30.561	25.7537	9.84362	8.35563	12.4762
ENSG00000077721	UBE2A	PC	ubiquitin conjugating enzyme E2 A	The modification of proteins with ubiquitin is an important cellular mechanism for targeting abnormal or short-lived proteins for degradation. Ubiquitination involves at least three classes of enzymes: ubiquitin-activating enzymes, ubiquitin-conjugating enzymes, and ubiquitin-protein ligases. This gene encodes a member of the E2 ubiquitin-conjugating enzyme family. This enzyme is required for pos…	hsa04120 (Ubiquitin mediated proteolysis), GO:0000209 (protein polyubiquitination), GO:0001701 (in utero embryonic development), GO:0006281 (DNA repair), GO:0006301 (postreplication repair), GO:0006511 (ubiquitin-dependent protein catabolic process), GO:0008284 (positive regulation of cell proliferation), GO:0009411 (response to UV), GO:0016567 (protein ubiquitination), GO:0033522 (histone H2A ub…		0.354599	0.534484		-0.291753	-0.329057	-0.268272				362.963	81.2416	36.7965	-0.762399	6.27977	47.4361	4.29927e-05	0.00326391	1.23137e-08	1.27166e-08	0.2	0.464103	0.0938647	-0.866025	-0.97988	0.0576689	0.00341561		96.2615	109.31	60.7786	59.1762	61.8088
ENSG00000049245	VAMP3	PC	vesicle associated membrane protein 3	Synaptobrevins/VAMPs, syntaxins, and the 25-kD synaptosomal-associated protein are the main components of a protein complex involved in the docking and/or fusion of synaptic vesicles with the presynaptic membrane. This gene is a member of the vesicle-associated membrane protein (VAMP)/synaptobrevin family. Because of its high homology to other known VAMPs, its broad tissue distribution, and its s…	hsa04130 (SNARE interactions in vesicular transport), hsa04145 (Phagosome), GO:0001921 (positive regulation of receptor recycling), GO:0002479 (antigen processing and presentation of exogenous peptide antigen via MHC class I, TAP-dependent), GO:0006461 (protein complex assembly), GO:0006887 (exocytosis), GO:0006904 (vesicle docking involved in exocytosis), GO:0006906 (vesicle fusion), GO:0016192 …		0.603613	0.295906		-0.305542	-0.303089	-0.290888				362.814	91.6975	32.7837	-0.766541	7.41479	47.4065	4.31051e-05	0.00326391	4.75865e-09	4.80236e-09	0.2	0.464103	0.16185	-0.866025	-0.94797	0.0576689	0.0141351		250.669	202.138	132.546	132.774	133.919
ENSG00000108854	SMURF2	PC	SMAD specific E3 ubiquitin protein ligase 2		hsa04120 (Ubiquitin mediated proteolysis), hsa04144 (Endocytosis), hsa04340 (Hedgehog signaling pathway), hsa04350 (TGF-beta signaling pathway), GO:0000122 (negative regulation of transcription from RNA polymerase II promoter), GO:0000209 (protein polyubiquitination), GO:0006511 (ubiquitin-dependent protein catabolic process), GO:0016579 (protein deubiquitination), GO:0017015 (regulation of trans…		0.614692	0.505525		-0.615569	-0.250802	-0.253846				361.655	78.3059	77.3702	-0.952516	6.05532	47.1776	4.39887e-05	0.00330434	1.92007e-09	1.95478e-09	0.2	0.464103	0.0044094	-0.866025	-0.975693	0.0576689	0.00453255		96.9482	89.7372	40.1757	52.3086	52.1941
ENSG00000144895	EIF2A	PC	eukaryotic translation initiation factor 2A	EIF2A is a 65-kD protein that catalyzes the formation of puromycin-sensitive 80S preinitiation complexes (Zoll et al., 2002 [PubMed 12133843]).[supplied by OMIM, Mar 2008]. Publication Note: This RefSeq record includes a subset of the publications that are available for this gene. Please see the Gene record to access additional publications.	GO:0006413 (translational initiation), GO:0006417 (regulation of translation), GO:0006468 (protein phosphorylation), GO:0009967 (positive regulation of signal transduction), GO:0032933 (SREBP signaling pathway), GO:0042255 (ribosome assembly), GO:1990928 (NA), GO:0005615 (extracellular space), GO:0005737 (cytoplasm), GO:0005850 (eukaryotic translation initiation factor 2 complex), GO:0022627 (cyt…		0.806693	0.330642		-0.386878	-0.289171	-0.461286				361.388	85.6662	29.7636	-0.984455	6.68221	47.1249	4.4195e-05	0.00330434	1.15154e-09	1.15985e-09	0.2	0.464103	0.202306	-0.866025	-0.91525	0.0576689	0.0292376		169.86	121.557	73.1404	78.4056	69.3632
ENSG00000116679	IVNS1ABP	PC	influenza virus NS1A binding protein		hsa05164 (Influenza A), GO:0006383 (transcription from RNA polymerase III promoter), GO:0008380 (RNA splicing), GO:0009615 (response to virus), GO:2001243 (negative regulation of intrinsic apoptotic signaling pathway), GO:0005654 (nucleoplasm), GO:0005667 (transcription factor complex), GO:0005681 (spliceosomal complex), GO:0005829 (cytosol), GO:0015629 (actin cytoskeleton)		0.554282	0.360067		-0.327112	-0.317843	-0.269393				359.698	78.6003	74.4847	-0.78744	6.07652	46.792	4.55267e-05	0.00337073	1.4849e-08	1.53728e-08	0.2	0.464103	0.0997055	-0.866025	-0.977746	0.0576689	0.00397178		96.147	83.7853	51.2784	51.6218	53.4532
ENSG00000160124	CCDC58	PC	coiled-coil domain containing 58		GO:0005739 (mitochondrion)		0.976793	0.43466		-0.536842	-0.372229	-0.502382				359.544	59.5559	6.5029	-1.28756	4.82712	46.7617	4.56501e-05	0.00337073	2.73088e-09	2.95204e-09	0.2	0.464103	0.200214	-0.866025	-0.919031	0.0576689	0.027319		52.0796	35.1394	16.9402	19.2294	17.398
ENSG00000109332	UBE2D3	PC	ubiquitin conjugating enzyme E2 D3	The modification of proteins with ubiquitin is an important cellular mechanism for targeting abnormal or short-lived proteins for degradation. Ubiquitination involves at least three classes of enzymes: ubiquitin-activating enzymes, or E1s, ubiquitin-conjugating enzymes, or E2s, and ubiquitin-protein ligases, or E3s. This gene encodes a member of the E2 ubiquitin-conjugating enzyme family. This en…	hsa04120 (Ubiquitin mediated proteolysis), hsa04141 (Protein processing in endoplasmic reticulum), GO:0000122 (negative regulation of transcription from RNA polymerase II promoter), GO:0000209 (protein polyubiquitination), GO:0006281 (DNA repair), GO:0006464 (cellular protein modification process), GO:0006511 (ubiquitin-dependent protein catabolic process), GO:0006513 (protein monoubiquitination)…		0.457526	1.33276		-0.456882	-0.50611	-0.827298				359.101	69.1033	39.539	-1.62809	5.40431	46.6745	4.6008e-05	0.00337619	1.62562e-10	1.76169e-10	0.2	0.464103	0.265571	-0.866025	-0.863372	0.0576689	0.0593661		49.447	92.3698	25.2958	24.3801	19.1149
ENSG00000000419	DPM1	PC	dolichyl-phosphate mannosyltransferase subunit 1, catalytic	Dolichol-phosphate mannose (Dol-P-Man) serves as a donor of mannosyl residues on the lumenal side of the endoplasmic reticulum (ER). Lack of Dol-P-Man results in defective surface expression of GPI-anchored proteins. Dol-P-Man is synthesized from GDP-mannose and dolichol-phosphate on the cytosolic side of the ER by the enzyme dolichyl-phosphate mannosyltransferase. Human DPM1 lacks a carboxy-term…	hsa00510 (N-Glycan biosynthesis), hsa01100 (Metabolic pathways), GO:0006506 (GPI anchor biosynthetic process), GO:0018279 (protein N-linked glycosylation via asparagine), GO:0019348 (dolichol metabolic process), GO:0035268 (protein mannosylation), GO:0035269 (protein O-linked mannosylation), GO:0005634 (nucleus), GO:0005783 (endoplasmic reticulum), GO:0005789 (endoplasmic reticulum membrane), GO:…		0.384916	0.439828		-0.236991	-0.320991	-0.266763				358.036	82.966	22.2175	-0.702777	6.43517	46.4653	4.68802e-05	0.00341909	2.57048e-08	2.65716e-08	0.2	0.464103	0.00758545	-0.866025	-0.995988	0.0576689	0.000304902		110.111	114.461	70.8512	66.7306	69.3632
ENSG00000242539	AC007620.2	antisense					0.748376	0.76295		-0.737774	-0.215588	-0.557964				357.222	51.1356	23.9674	-1.37079	4.35351	46.3055	4.75602e-05	0.00344754	2.46618e-09	2.74071e-09	0.2	0.464103	0.00577041	-0.866025	-0.984549	0.0576689	0.00230021		31.8201	32.1635	10.0725	15.3377	11.675
ENSG00000055044	NOP58	PC	NOP58 ribonucleoprotein		hsa03008 (Ribosome biogenesis in eukaryotes), GO:0000154 (rRNA modification), GO:0006364 (rRNA processing), GO:0016049 (cell growth), GO:0048254 (snoRNA localization), GO:0001650 (fibrillar center), GO:0005634 (nucleus), GO:0005654 (nucleoplasm), GO:0005730 (nucleolus), GO:0005732 (small nucleolar ribonucleoprotein complex), GO:0005829 (cytosol), GO:0015030 (Cajal body), GO:0016020 (membrane), GO…		0.774788	0.308355		-0.315137	-0.475501	-0.292505				356.546	94.4398	13.2834	-0.926571	7.94211	46.173	4.81327e-05	0.00346789	1.41346e-09	1.41495e-09	0.2	0.464103	0.203769	-0.866025	-0.911933	0.0576689	0.030955		398.667	287.983	186.228	166.426	189.204
ENSG00000209082	MT-TL1	Mt_tRNA	mitochondrially encoded tRNA leucine 1 (UUA/G)				1.31387	0.64144		-1.1371	-0.489087	-0.329118				355.917	74.8234	0.319677	-1.69273	5.80366	46.0499	4.8672e-05	0.00347867	1.27672e-10	1.38034e-10	0.2	0.464103	0.193842	-0.866025	-0.905729	0.0576689	0.03425		117.208	72.797	19.8017	32.1635	36.1696
ENSG00000163507	CIP2A	PC	cell proliferation regulating inhibitor of protein phosphatase 2A		GO:0007283 (spermatogenesis), GO:2000179 (positive regulation of neural precursor cell proliferation), GO:0005737 (cytoplasm), GO:0005829 (cytosol), GO:0005886 (plasma membrane), GO:0016021 (integral component of membrane), GO:0005515 (protein binding), GO:0045296 (cadherin binding)		0.495545	0.482309		-0.350928	-0.394216	-0.23271				355.691	70.0286	75.9401	-0.849638	5.47507	46.0057	4.88675e-05	0.00347867	2.41549e-08	2.53356e-08	0.2	0.464103	0.00124384	-0.866025	-0.994952	0.0576689	0.000430175		60.6642	60.0919	32.8502	31.8201	35.8262
ENSG00000198856	OSTC	PC	oligosaccharyltransferase complex non-catalytic subunit		GO:0018279 (protein N-linked glycosylation via asparagine), GO:0008250 (oligosaccharyltransferase complex), GO:0016021 (integral component of membrane), GO:0004579 (dolichyl-diphosphooligosaccharide-protein glycotransferase activity), GO:0005515 (protein binding)		0.463938	0.566091		-0.158489	-0.383003	-0.488537				354.947	78.4489	10.2465	-0.877983	6.06423	45.8602	4.95179e-05	0.00349212	6.07404e-09	6.22797e-09	0.2	0.464103	0.00438067	-0.866025	-0.97741	0.0576689	0.00406198		88.4781	95.1169	56.7725	48.3024	44.7541
ENSG00000113811	SELENOK	PC	selenoprotein K	This gene encodes a selenoprotein, which contains a selenocysteine (Sec) residue at its active site. The selenocysteine is encoded by the UGA codon that normally signals translation termination. The 3_ UTR of selenoprotein genes have a common stem-loop structure, the sec insertion sequence (SECIS), that is necessary for the recognition of UGA as a Sec codon rather than as a stop signal. This sele…	GO:0002376 (immune system process), GO:0006816 (calcium ion transport), GO:0006979 (response to oxidative stress), GO:0032469 (endoplasmic reticulum calcium ion homeostasis), GO:0070059 (intrinsic apoptotic signaling pathway in response to endoplasmic reticulum stress), GO:0005783 (endoplasmic reticulum), GO:0005789 (endoplasmic reticulum membrane), GO:0005794 (Golgi apparatus), GO:0005886 (plasm…		-0.476141	-0.350381		0.285119	0.310385	0.231018				354.803	88.5599	13.1068	0.699295	7.01452	45.8322	4.9644e-05	0.00349212	2.4694e-08	2.42106e-08	0.2	0.464103	0.0113688	0.866025	0.991342	0.0576689	0.000965831		89.7372	98.0928	153.492	156.239	147.769
ENSG00000129636	ITFG1	PC	integrin alpha FG-GAP repeat containing 1		GO:0016021 (integral component of membrane), GO:0070062 (extracellular vesicular exosome)		0.527826	0.737917		-0.529968	-0.504047	-0.231727				353.978	58.8577	50.2902	-1.13012	4.78342	45.6711	5.03784e-05	0.00352293	8.23588e-09	8.88664e-09	0.2	0.464103	0.0502316	-0.866025	-0.97453	0.0576689	0.00486081		37.4287	43.6095	16.9402	17.2836	21.2897
ENSG00000224114	AL591846.1	p_Pg					-0.505844	-1.14229		0.62046	0.678939	0.34873				352.643	66.6386	2.64154	1.43503	5.26008	45.4109	5.15922e-05	0.00358671	6.10725e-10	7.4789e-10	0.2	0.464103	0.0242094	0.866025	0.955097	0.0576689	0.0113449		23.35	14.3076	53.3387	55.6279	43.8385
ENSG00000078304	PPP2R5C	PC	protein phosphatase 2 regulatory subunit B'gamma	The product of this gene belongs to the phosphatase 2A regulatory subunit B family. Protein phosphatase 2A is one of the four major Ser/Thr phosphatases, and it is implicated in the negative control of cell growth and division. It consists of a common heteromeric core enzyme, which is composed of a catalytic subunit and a constant regulatory subunit, that associates with a variety of regulatory s…	hsa03015 (mRNA surveillance pathway), hsa04071 (Sphingolipid signaling pathway), hsa04114 (Oocyte meiosis), hsa04151 (PI3K-Akt signaling pathway), hsa04152 (AMPK signaling pathway), hsa04261 (Adrenergic signaling in cardiomyocytes), hsa04728 (Dopaminergic synapse), hsa05165 (Human papillomavirus infection), GO:0007165 (signal transduction), GO:0008285 (negative regulation of cell proliferation), …		0.657062	0.332183		-0.430361	-0.290103	-0.268781				351.741	82.9997	38.4958	-0.850799	6.43707	45.2353	5.24308e-05	0.00362162	7.28734e-09	7.42764e-09	0.2	0.464103	0.150615	-0.866025	-0.945357	0.0576689	0.0152072		131.401	104.503	60.7786	67.1884	68.2186
ENSG00000115310	RTN4	PC	reticulon 4	This gene belongs to the family of reticulon encoding genes. Reticulons are associated with the endoplasmic reticulum, and are involved in neuroendocrine secretion or in membrane trafficking in neuroendocrine cells. The product of this gene is a potent neurite outgrowth inhibitor which may also help block the regeneration of the central nervous system in higher vertebrates. Alternatively spliced …	hsa05010 (Alzheimer disease), GO:0006915 (apoptotic process), GO:0007413 (axonal fasciculation), GO:0010634 (positive regulation of epithelial cell migration), GO:0021801 (cerebral cortex radial glia guided migration), GO:0030308 (negative regulation of cell growth), GO:0030517 (negative regulation of axon extension), GO:0033601 (positive regulation of mammary gland epithelial cell proliferation)…		0.310497	0.850174		-0.410307	-0.279934	-0.47043				351.451	91.1087	78.8088	-1.00242	7.33481	45.1789	5.27035e-05	0.00362162	1.30219e-09	1.30583e-09	0.2	0.464103	0.223543	-0.866025	-0.898377	0.0576689	0.03829		187.487	273.447	112.973	123.847	108.28
ENSG00000172167	MTBP	PC	MDM2 binding protein	This gene encodes a protein that interacts with the oncoprotein mouse double minute 2. The encoded protein regulates progression through the cell cycle and may be involved in tumor formation. [provided by RefSeq, Aug 2012].	GO:0007050 (cell cycle arrest), GO:0007089 (traversing start control point of mitotic cell cycle), GO:0008285 (negative regulation of cell proliferation), GO:0034501 (protein localization to kinetochore), GO:0045839 (negative regulation of mitosis), GO:0000776 (kinetochore), GO:0000785 (chromatin)		0.627218	0.958848		-0.730879	-0.551371	-0.303816				351.121	42.0676	49.7771	-1.52009	3.83177	45.1149	5.30157e-05	0.00362213	4.86119e-09	5.58983e-09	0.2	0.464103	0.0966204	-0.866025	-0.963409	0.0576689	0.008356		20.1451	25.8681	6.63872	7.78333	9.6147
ENSG00000100994	PYGB	PC	glycogen phosphorylase B	The protein encoded by this gene is a glycogen phosphorylase found predominantly in the brain. The encoded protein forms homodimers which can associate into homotetramers, the enzymatically active form of glycogen phosphorylase. The activity of this enzyme is positively regulated by AMP and negatively regulated by ATP, ADP, and glucose-6-phosphate. This enzyme catalyzes the rate-determining step …	hsa00500 (Starch and sucrose metabolism), hsa01100 (Metabolic pathways), hsa04217 (Necroptosis), hsa04910 (Insulin signaling pathway), hsa04922 (Glucagon signaling pathway), hsa04931 (Insulin resistance), GO:0005980 (glycogen catabolic process), GO:0043312 (neutrophil degranulation), GO:0005576 (extracellular region), GO:0005737 (cytoplasm), GO:0016020 (membrane), GO:0035578 (azurophil granule lu…		-0.363658	-0.438174		0.284566	0.286824	0.230443				350.469	87.929	68.6548	0.679841	6.92141	44.9883	5.36389e-05	0.0036327	4.25278e-08	4.1641e-08	0.2	0.464103	0.00204475	0.866025	0.995496	0.0576689	0.000362594		91.2252	86.5323	144.106	144.335	138.726
ENSG00000142856	ITGB3BP	PC	integrin subunit beta 3 binding protein	This gene encodes a transcriptional coregulator that binds to and enhances the activity of members of the nuclear receptor families, thyroid hormone receptors and retinoid X receptors. This protein also acts as a corepressor of NF-kappaB-dependent signaling. This protein induces apoptosis in breast cancer cells through a caspase 2-mediated signaling pathway. This protein is also a component of th…	GO:0006351 (transcription, DNA-templated), GO:0006355 (regulation of transcription, DNA-templated), GO:0006915 (apoptotic process), GO:0007062 (sister chromatid cohesion), GO:0007067 (mitotic nuclear division), GO:0007155 (cell adhesion), GO:0007165 (signal transduction), GO:0034080 (CENP-A containing nucleosome assembly), GO:0043065 (positive regulation of apoptotic process), GO:0051301 (cell di…		0.359081	0.956928		-0.472954	-0.434839	-0.408217				350.223	69.5575	15.9923	-1.18037	5.43974	44.9406	5.3876e-05	0.0036327	2.81385e-09	2.96551e-09	0.2	0.464103	0.229138	-0.866025	-0.899042	0.0576689	0.0379187		51.2784	78.6345	27.9284	28.7296	29.3019
ENSG00000183617	MRPL54	PC	mitochondrial ribosomal protein L54	Mammalian mitochondrial ribosomal proteins are encoded by nuclear genes and help in protein synthesis within the mitochondrion. Mitochondrial ribosomes (mitoribosomes) consist of a small 28S subunit and a large 39S subunit. They have an estimated 75% protein to rRNA composition compared to prokaryotic ribosomes, where this ratio is reversed. Another difference between mammalian mitoribosomes and …	GO:0070125 (mitochondrial translational elongation), GO:0070126 (mitochondrial translational termination), GO:0005743 (mitochondrial inner membrane), GO:0005762 (mitochondrial large ribosomal subunit), GO:0003723 (RNA binding), R-HSA-1852241 (Homo sapiens: Organelle biogenesis and maintenance), R-HSA-5368286 (Homo sapiens: Mitochondrial translation initiation), R-HSA-5368287 (Homo sapiens: Mitoch…		-0.398136	-0.4307		0.311351	0.280735	0.23675				349.687	83.3361	5.23261	0.707879	6.46688	44.8365	5.43978e-05	0.0036327	4.82386e-08	4.62853e-08	0.2	0.464103	0.000345963	0.866025	0.995875	0.0576689	0.000317832		64.6703	63.1823	107.021	104.732	101.527
ENSG00000107371	EXOSC3	PC	exosome component 3	This gene encodes a non-catalytic component of the human exosome, a complex with 3_-5_ exoribonuclease activity that plays a role in numerous RNA processing and degradation activities. Related pseudogenes of this gene are found on chromosome 19 and 21. Alternatively spliced transcript variants encoding different isoforms have been described. [provided by RefSeq, Jun 2012].	hsa03018 (RNA degradation), GO:0000467 (exonucleolytic trimming to generate mature 3'-end of 5.8S rRNA from tricistronic rRNA transcript (SSU-rRNA, 5.8S rRNA, LSU-rRNA)), GO:0006364 (rRNA processing), GO:0034427 (nuclear-transcribed mRNA catabolic process, exonucleolytic, 3'-5'), GO:0034475 (U4 snRNA 3'-end processing), GO:0043488 (regulation of mRNA stability), GO:0043928 (exonucleolytic nuclear…		0.413674	0.449029		-0.361898	-0.204499	-0.296306				349.597	80.2069	14.7304	-0.736918	6.19485	44.8191	5.44853e-05	0.0036327	3.32864e-08	3.44899e-08	0.2	0.464103	0.000458457	-0.866025	-0.99318	0.0576689	0.000675439		94.8879	97.2916	54.5978	61.122	57.2304
ENSG00000169288	MRPL1	PC	mitochondrial ribosomal protein L1	Mammalian mitochondrial ribosomal proteins are encoded by nuclear genes and help in protein synthesis within the mitochondrion. Mitochondrial ribosomes (mitoribosomes) consist of a small 28S subunit and a large 39S subunit. They have an estimated 75% protein to rRNA composition compared to prokaryotic ribosomes, where this ratio is reversed. Another difference between mammalian mitoribosomes and …	hsa03010 (Ribosome), GO:0000469 (cleavage involved in rRNA processing), GO:0000470 (maturation of LSU-rRNA), GO:0006412 (translation), GO:0031118 (rRNA pseudouridine synthesis), GO:0031120 (snRNA pseudouridine synthesis), GO:0070125 (mitochondrial translational elongation), GO:0070126 (mitochondrial translational termination), GO:0005739 (mitochondrion), GO:0005743 (mitochondrial inner membrane),…		0.574236	0.535472		-0.394348	-0.329305	-0.386056				349.291	57.0744	12.2487	-0.997164	4.68285	44.7599	5.47856e-05	0.0036327	4.48252e-08	4.83719e-08	0.2	0.464103	0.00290744	-0.866025	-0.998701	0.0576689	5.62184e-05		36.8564	35.8262	17.8559	18.7716	17.9703
ENSG00000164111	ANXA5	PC	annexin A5	The protein encoded by this gene belongs to the annexin family of calcium-dependent phospholipid binding proteins some of which have been implicated in membrane-related events along exocytotic and endocytotic pathways. Annexin 5 is a phospholipase A2 and protein kinase C inhibitory protein with calcium channel activity and a potential role in cellular signal transduction, inflammation, growth and…	GO:0002576 (platelet degranulation), GO:0007165 (signal transduction), GO:0007596 (blood coagulation), GO:0010033 (response to organic substance), GO:0043066 (negative regulation of apoptotic process), GO:0043086 (negative regulation of catalytic activity), GO:0050819 (negative regulation of coagulation), GO:0005576 (extracellular region), GO:0005622 (intracellular), GO:0005737 (cytoplasm), GO:00…		0.284364	0.600449		-0.375419	-0.233406	-0.275988				349.07	97.6363	23.9421	-0.747748	8.94271	44.7171	5.50038e-05	0.0036327	9.79596e-09	9.75953e-09	0.2	0.464103	0.160766	-0.866025	-0.940235	0.0576689	0.0173809		578.37	720.53	365.359	403.36	391.57
ENSG00000173409	ARV1	PC	ARV1 homolog, fatty acid homeostasis modulator		GO:0006695 (cholesterol biosynthetic process), GO:0008206 (bile acid metabolic process), GO:0030301 (cholesterol transport), GO:0032383 (regulation of intracellular cholesterol transport), GO:0090181 (regulation of cholesterol metabolic process), GO:0005789 (endoplasmic reticulum membrane), GO:0016021 (integral component of membrane), GO:0015248 (sterol transporter activity), R-HSA-1430728 (Homo …		0.560557	0.424875		-0.278519	-0.350805	-0.356109				347.089	67.4714	27.8119	-0.863666	5.30922	44.334	5.70037e-05	0.00373771	4.68603e-08	4.93261e-08	0.2	0.464103	0.0586437	-0.866025	-0.989137	0.0576689	0.00135698		56.6581	51.3929	30.7899	29.1875	29.073
ENSG00000121481	RNF2	PC	ring finger protein 2	Polycomb group (PcG) of proteins form the multiprotein complexes that are important for the transcription repression of various genes involved in development and cell proliferation. The protein encoded by this gene is one of the PcG proteins. It has been shown to interact with, and suppress the activity of, transcription factor CP2 (TFCP2/CP2). Studies of the mouse counterpart suggested the invol…	GO:0000122 (negative regulation of transcription from RNA polymerase II promoter), GO:0000278 (mitotic cell cycle), GO:0001702 (gastrulation with mouth forming second), GO:0006351 (transcription, DNA-templated), GO:0007281 (germ cell development), GO:0009948 (anterior/posterior axis specification), GO:0035518 (histone H2A monoubiquitination), GO:0036353 (histone H2A-K119 monoubiquitination), GO:0…		0.72464	0.792449		-0.813588	-0.497908	-0.205593				346.65	55.0303	63.0268	-1.35343	4.56641	44.2493	5.74578e-05	0.00373771	3.22817e-09	3.54143e-09	0.2	0.464103	0.00304822	-0.866025	-0.979829	0.0576689	0.00342863		36.0551	37.8865	11.1027	14.3076	17.9703
ENSG00000232220	AC008440.2	antisense					0.708837	0.935399		-0.857227	-0.268912	-0.518096				346.296	44.8435	2.4144	-1.53923	3.98562	44.1809	5.78273e-05	0.00373771	3.35785e-09	3.83418e-09	0.2	0.464103	0.032595	-0.866025	-0.973488	0.0576689	0.00516144		23.5789	27.9284	6.63872	10.9882	8.92794
ENSG00000134986	NREP	PC	neuronal regeneration related protein		GO:0005737 (cytoplasm), GO:0005515 (protein binding)		0.352783	0.84224		-0.330708	-0.50039	-0.363925				346.273	73.5616	29.3262	-1.05382	5.71024	44.1765	5.78514e-05	0.00373771	5.15414e-09	5.22002e-09	0.2	0.464103	0.201186	-0.866025	-0.91651	0.0576689	0.0285935		62.61	88.7071	38.2299	33.7659	37.3142
ENSG00000179958	DCTPP1	PC	dCTP pyrophosphatase 1		hsa00240 (Pyrimidine metabolism), hsa01100 (Metabolic pathways), GO:0006253 (dCTP catabolic process), GO:0009143 (nucleoside triphosphate catabolic process), GO:0042262 (DNA protection), GO:0051289 (protein homotetramerization), GO:0005634 (nucleus), GO:0005739 (mitochondrion), GO:0005829 (cytosol), GO:0000287 (magnesium ion binding), GO:0005515 (protein binding), GO:0032556 (pyrimidine deoxyribo…		-0.442526	-0.392098		0.366148	0.298425	0.170052				345.567	89.3843	18.0281	0.708568	7.10463	44.0404	5.85955e-05	0.00375286	3.46667e-08	3.42942e-08	0.2	0.464103	0.00717058	0.866025	0.973951	0.0576689	0.00502708		97.7495	101.298	172.721	164.709	150.516
ENSG00000035403	VCL	PC	vinculin	Vinculin is a cytoskeletal protein associated with cell-cell and cell-matrix junctions, where it is thought to function as one of several interacting proteins involved in anchoring F-actin to the membrane. Defects in VCL are the cause of cardiomyopathy dilated type 1W. Dilated cardiomyopathy is a disorder characterized by ventricular dilation and impaired systolic function, resulting in congestiv…	hsa04510 (Focal adhesion), hsa04520 (Adherens junction), hsa04670 (Leukocyte transendothelial migration), hsa04810 (Regulation of actin cytoskeleton), hsa05100 (Bacterial invasion of epithelial cells), hsa05131 (Shigellosis), hsa05146 (Amoebiasis), GO:0002009 (morphogenesis of an epithelium), GO:0002576 (platelet degranulation), GO:0006928 (cellular component movement), GO:0006936 (muscle contrac…		0.585525	0.396268		-0.495103	-0.350995	-0.135695				345.253	91.0498	93.6233	-0.823714	7.32352	43.9799	5.89306e-05	0.00375286	6.62368e-09	6.67305e-09	0.2	0.464103	0.0378887	-0.866025	-0.960016	0.0576689	0.00953985		230.753	202.138	108.051	119.611	139.184
ENSG00000111845	PAK1IP1	PC	PAK1 interacting protein 1		GO:0008283 (cell proliferation), GO:0009968 (negative regulation of signal transduction), GO:0060021 (palate development), GO:0005730 (nucleolus), GO:0005515 (protein binding)		0.660229	0.331442		-0.336121	-0.253082	-0.402468				345.157	79.8452	66.3414	-0.857426	6.17305	43.9614	5.90331e-05	0.00375286	1.38781e-08	1.42027e-08	0.2	0.464103	0.154325	-0.866025	-0.945513	0.0576689	0.0151423		109.768	86.9902	54.0255	57.3448	51.5073
ENSG00000159147	DONSON	PC	downstream neighbor of SON	This gene lies downstream of the SON gene and spans 10 kb on chromosome 21. The function of this gene is unknown. [provided by RefSeq, Jul 2008].	GO:0007275 (multicellular organismal development), GO:0008150 (biological_process), GO:0033260 (nuclear cell cycle DNA replication), GO:0005575 (cellular_component), GO:0005634 (nucleus), GO:0003674 (molecular_function)		0.424167	0.42666		-0.340954	-0.156141	-0.353732				344.571	85.3129	51.7877	-0.720087	6.64309	43.8487	5.96639e-05	0.00376413	3.0746e-08	3.15089e-08	0.2	0.464103	0.0050437	-0.866025	-0.987444	0.0576689	0.00168577		130.371	130.6	75.8875	86.5323	75.2007
ENSG00000094880	CDC23	PC	cell division cycle 23	The protein encoded by this gene shares strong similarity with Saccharomyces cerevisiae Cdc23, a protein essential for cell cycle progression through the G2/M transition. This protein is a component of anaphase-promoting complex (APC), which is composed of eight protein subunits and highly conserved in eukaryotic cells. APC catalyzes the formation of cyclin B-ubiquitin conjugate that is responsib…	hsa04110 (Cell cycle), hsa04114 (Oocyte meiosis), hsa04120 (Ubiquitin mediated proteolysis), hsa04914 (Progesterone-mediated oocyte maturation), hsa05166 (Human T-cell leukemia virus 1 infection), GO:0006511 (ubiquitin-dependent protein catabolic process), GO:0007067 (mitotic nuclear division), GO:0007080 (mitotic metaphase plate congression), GO:0007091 (metaphase/anaphase transition of mitotic …		0.500627	0.497634		-0.411013	-0.231416	-0.355831				344.406	66.9667	21.5782	-0.872422	5.28231	43.8169	5.98436e-05	0.00376413	4.66176e-08	4.91109e-08	0.2	0.464103	0.00223447	-0.866025	-0.99432	0.0576689	0.000513451		53.2242	53.1098	27.3561	31.2478	28.5007
ENSG00000123472	ATPAF1	PC	ATP synthase mitochondrial F1 complex assembly factor 1	This gene encodes an assembly factor for the F(1) component of the mitochondrial ATP synthase. This protein binds specifically to the F1 beta subunit and is thought to prevent this subunit from forming nonproductive homooligomers during enzyme assembly. Alternatively spliced transcript variants have been identified. [provided by RefSeq, Aug 2011].	GO:0033615 (mitochondrial proton-transporting ATP synthase complex assembly), GO:0005739 (mitochondrion), GO:0005515 (protein binding)		0.685413	0.316469		-0.333705	-0.26388	-0.404297				343.236	81.8388	41.3898	-0.866417	6.3303	43.5923	6.11299e-05	0.0038248	1.1877e-08	1.21052e-08	0.2	0.464103	0.173198	-0.866025	-0.93525	0.0576689	0.0195852		124.304	95.8036	60.3208	63.4112	57.3448
ENSG00000198786	MT-ND5	PC	mitochondrially encoded NADH:ubiquinone oxidoreductase core subunit 5		hsa00190 (Oxidative phosphorylation), hsa01100 (Metabolic pathways), hsa04714 (Thermogenesis), hsa04723 (Retrograde endocannabinoid signaling), hsa05012 (Parkinson disease), R-HSA-1428517 (Homo sapiens: The citric acid (TCA) cycle and respiratory electron transport), R-HSA-1430728 (Homo sapiens: Metabolism), R-HSA-163200 (Homo sapiens: Respiratory electron transport, ATP synthesis by chemiosmotic…		0.518553	0.828233		-0.763629	-0.449519	-0.133639				342.603	99.7561	66.6695	-1.10867	11.2868	43.4708	6.18393e-05	0.00384816	2.00872e-09	2.01418e-09	0.2	0.464103	0.0699009	-0.866025	-0.942727	0.0576689	0.0163114		3289.37	4077.43	1351.32	1680.51	2092.34
ENSG00000284121	MIR198	miRNA	microRNA 198				0.531183	0.522573		-0.342246	-0.139635	-0.571875				342.066	82.1837	0.075713	-0.888417	6.35956	43.3679	6.24483e-05	0.00384816	7.61399e-09	7.74769e-09	0.2	0.464103	0.0104521	-0.866025	-0.973877	0.0576689	0.00504838		113.431	112.744	61.0076	70.5078	51.7362
ENSG00000135317	SNX14	PC	sorting nexin 14	This gene encodes a member of the sorting nexin family. Members of this family have a phox (PX) phosphoinositide binding domain and are involved in intracellular trafficking. The encoded protein also contains a regulator of G protein signaling (RGS) domain. Regulator of G protein signaling family members are regulatory molecules that act as GTPase activating proteins for G alpha subunits of heter…	GO:0015031 (protein transport), GO:0097352 (autophagic vacuole maturation), GO:0005764 (lysosome), GO:0005765 (lysosomal membrane), GO:0005770 (late endosome), GO:0016021 (integral component of membrane), GO:0030425 (dendrite), GO:0031902 (late endosome membrane), GO:0080025 (phosphatidylinositol-3,5-bisphosphate binding)		0.552862	0.611685		-0.522336	-0.204324	-0.437887				341.768	60.8849	66.6863	-1.0293	4.90745	43.3108	6.27891e-05	0.00384816	2.37945e-08	2.54466e-08	0.2	0.464103	0.00134691	-0.866025	-0.986302	0.0576689	0.00192048		42.0071	43.8385	18.886	24.0368	20.1451
ENSG00000134453	RBM17	PC	RNA binding motif protein 17	This gene encodes an RNA binding protein. The encoded protein is part of the spliceosome complex and functions in the second catalytic step of mRNA splicing. Alternatively spliced transcript variants have been described. Related pseudogenes exist on chromosomes 9 and 15. [provided by RefSeq, Mar 2009].	hsa03040 (Spliceosome), GO:0000380 (alternative mRNA splicing, via spliceosome), GO:0000398 (mRNA splicing, via spliceosome), GO:0006281 (DNA repair), GO:0043484 (regulation of RNA splicing), GO:0005654 (nucleoplasm), GO:0005681 (spliceosomal complex), GO:0043234 (protein complex), GO:0003723 (RNA binding), GO:0005515 (protein binding), R-HSA-72163 (Homo sapiens: mRNA Splicing - Major Pathway), R…		0.723633	0.588868		-0.534126	-0.448797	-0.329578				341.693	44.709	38.622	-1.23636	3.97936	43.2964	6.28756e-05	0.00384816	4.18137e-08	4.68739e-08	0.2	0.464103	0.0291094	-0.866025	-0.990381	0.0576689	0.00113091		24.9524	22.5488	9.27132	9.95808	10.9882
ENSG00000166801	FAM111A	PC	family with sequence similarity 111 member A		GO:0006260 (DNA replication), GO:0045071 (negative regulation of viral genome replication), GO:0051607 (defense response to virus), GO:0000785 (chromatin), GO:0001650 (fibrillar center), GO:0005634 (nucleus), GO:0005737 (cytoplasm), GO:0005515 (protein binding)		0.611944	0.330545		-0.331066	-0.381645	-0.229778				341.479	80.9976	79.9277	-0.81136	6.25706	43.2554	6.31217e-05	0.00384816	2.3023e-08	2.36089e-08	0.2	0.464103	0.13412	-0.866025	-0.954514	0.0576689	0.0115656		112.973	92.5987	57.8027	55.7424	62.1522
ENSG00000141429	GALNT1	PC	polypeptide N-acetylgalactosaminyltransferase 1	This gene encodes a member of the UDP-N-acetyl-alpha-D-galactosamine:polypeptide N-acetylgalactosaminyltransferase (GalNAc-T) family of enzymes. GalNAc-Ts initiate mucin-type O-linked glycosylation in the Golgi apparatus by catalyzing the transfer of GalNAc to serine and threonine residues on target proteins. They are characterized by an N-terminal transmembrane domain, a stem region, a lumenal c…	hsa00512 (Mucin type O-glycan biosynthesis), hsa01100 (Metabolic pathways), GO:0006493 (protein O-linked glycosylation), GO:0016266 (O-glycan processing), GO:0018242 (protein O-linked glycosylation via serine), GO:0018243 (protein O-linked glycosylation via threonine), GO:0000139 (Golgi membrane), GO:0005576 (extracellular region), GO:0005789 (endoplasmic reticulum membrane), GO:0005794 (Golgi ap…		0.384963	0.598503		-0.325448	-0.387981	-0.270037				339.905	69.8015	60.5872	-0.859882	5.46089	42.9546	6.49671e-05	0.00393605	5.26391e-08	5.50658e-08	0.2	0.464103	0.0982643	-0.866025	-0.974576	0.0576689	0.00484775		55.399	64.5559	33.0792	31.5912	34.4527
ENSG00000260260	SNHG19	lincRNA	small nucleolar RNA host gene 19				-0.608151	-0.634036		0.414293	0.382369	0.445525				339.689	49.5373	1.54791	1.16545	4.2497	42.9132	6.52257e-05	0.00393605	8.30707e-08	1.02075e-07	0.2	0.464103	0.000188626	0.866025	0.998421	0.0576689	7.53038e-05		10.8738	10.6448	24.1512	23.5789	24.7235
ENSG00000117614	SYF2	PC	SYF2 pre-mRNA splicing factor	This gene encodes a nuclear protein that interacts with cyclin D-type binding-protein 1, which is thought to be a cell cycle regulator at the G1/S transition. Alternate transcriptional splice variants, encoding different isoforms, have been characterized. [provided by RefSeq, Jul 2008].	hsa03040 (Spliceosome), GO:0000398 (mRNA splicing, via spliceosome), GO:0001701 (in utero embryonic development), GO:0007095 (mitotic G2 DNA damage checkpoint), GO:0007369 (gastrulation), GO:0008284 (positive regulation of cell proliferation), GO:0048568 (embryonic organ development), GO:0000974 (Prp19 complex), GO:0005634 (nucleus), GO:0005654 (nucleoplasm), GO:0016607 (nuclear speck), GO:007101…		0.64033	0.644921		-0.725461	-0.412416	-0.147375				338.568	71.6437	34.2054	-1.0965	5.57959	42.6995	6.65823e-05	0.00399763	4.70551e-09	4.93169e-09	0.2	0.464103	0.0110991	-0.866025	-0.972797	0.0576689	0.00536388		69.821	70.05	25.8681	32.6213	39.6034
ENSG00000017260	ATP2C1	PC	ATPase secretory pathway Ca2+ transporting 1	The protein encoded by this gene belongs to the family of P-type cation transport ATPases. This magnesium-dependent enzyme catalyzes the hydrolysis of ATP coupled with the transport of calcium ions. Defects in this gene cause Hailey-Hailey disease, an autosomal dominant disorder. Alternatively spliced transcript variants encoding different isoforms have been identified. [provided by RefSeq, Aug 2…	GO:0006816 (calcium ion transport), GO:0006874 (cellular calcium ion homeostasis), GO:0007165 (signal transduction), GO:0008544 (epidermis development), GO:0016339 (calcium-dependent cell-cell adhesion via plasma membrane cell adhesion molecules), GO:0031532 (actin cytoskeleton reorganization), GO:0032468 (Golgi calcium ion homeostasis), GO:0032472 (Golgi calcium ion transport), GO:0034220 (ion t…		0.628175	1.17325		-0.830517	-0.65907	-0.31184				338.004	36.07	85.4715	-1.81178	3.50228	42.5921	6.72769e-05	0.00401903	4.85096e-09	5.7897e-09	0.2	0.464103	0.166262	-0.866025	-0.930454	0.0576689	0.0217853		15.4522	23.4644	4.34951	5.15073	7.09657
ENSG00000166710	B2M	PC	beta-2-microglobulin	This gene encodes a serum protein found in association with the major histocompatibility complex (MHC) class I heavy chain on the surface of nearly all nucleated cells. The protein has a predominantly beta-pleated sheet structure that can form amyloid fibrils in some pathological conditions. The encoded antimicrobial protein displays antibacterial activity in amniotic fluid. A mutation in this ge…	hsa04612 (Antigen processing and presentation), hsa05163 (Human cytomegalovirus infection), hsa05166 (Human T-cell leukemia virus 1 infection), hsa05169 (Epstein-Barr virus infection), hsa05170 (Human immunodeficiency virus 1 infection), GO:0001895 (retina homeostasis), GO:0001916 (positive regulation of T cell mediated cytotoxicity), GO:0002237 (response to molecule of bacterial origin), GO:0002…		0.318451	0.357693		-0.190244	-0.232072	-0.253828				337.379	99.0158	24.6067	-0.564386	10.0498	42.4732	6.8056e-05	0.00404525	1.77607e-07	1.76149e-07	0.2	0.464103	0.00358987	-0.866025	-0.996697	0.0576689	0.000227724		1297.3	1333.12	911.222	885.125	871.847
ENSG00000164329	TENT2	PC	terminal nucleotidyltransferase 2		GO:0002244 (hematopoietic progenitor cell differentiation), GO:0006397 (mRNA processing), GO:0021766 (hippocampus development), GO:0030182 (neuron differentiation), GO:0043631 (RNA polyadenylation), GO:0060041 (retina development in camera-type eye), GO:0071044 (histone mRNA catabolic process), GO:1990603 (NA), GO:0005829 (cytosol), GO:0031380 (nuclear RNA-directed RNA polymerase complex), GO:000…		0.647575	0.717462		-0.623627	-0.385209	-0.356201				336.55	41.9246	42.0207	-1.30032	3.82246	42.3157	6.91053e-05	0.00408199	3.84872e-08	4.36224e-08	0.2	0.464103	0.000902933	-0.866025	-0.992728	0.0576689	0.000743641		21.0608	22.2054	7.55441	9.27132	9.50024
ENSG00000248527	MTATP6P1	u_Pg	mitochondrially encoded ATP synthase 6 pseudogene 1				0.419821	0.50884		-0.439658	-0.397123	-0.0918803				336.351	99.3775	9.11079	-0.767137	10.4677	42.2777	6.93609e-05	0.00408199	2.18609e-08	2.16891e-08	0.2	0.464103	0.00509619	-0.866025	-0.965854	0.0576689	0.00753557		1823.36	1939.54	1004.05	1034.15	1278.3
ENSG00000109472	CPE	PC	carboxypeptidase E	This gene encodes a carboxypeptidase that cleaves C-terminal amino acid residues and is involved in the biosynthesis of peptide hormones and neurotransmitters, including insulin. It is a peripheral membrane protein. The protein specifically binds regulated secretory pathway proteins, including prohormones, but not constitutively secreted proteins. Mutations in this gene are implicated in type II …	hsa04940 (Type I diabetes mellitus), GO:0003214 (cardiac left ventricle morphogenesis), GO:0006464 (cellular protein modification process), GO:0007218 (neuropeptide signaling pathway), GO:0008152 (metabolic process), GO:0016055 (Wnt signaling pathway), GO:0030070 (insulin processing), GO:0072657 (protein localization to membrane), GO:0005615 (extracellular space), GO:0005634 (nucleus), GO:0005794…		0.5723	0.697616		-0.250934	-0.538355	-0.480627				335.296	50.6814	19.2059	-1.16212	4.32414	42.0776	7.07277e-05	0.00414192	4.65315e-08	5.10482e-08	0.2	0.464103	0.0108997	-0.866025	-0.986086	0.0576689	0.00196619		28.2718	31.0189	15.1088	12.0184	12.5907
ENSG00000198918	RPL39	PC	ribosomal protein L39	Ribosomes, the organelles that catalyze protein synthesis, consist of a small 40S subunit and a large 60S subunit. Together these subunits are composed of 4 RNA species and approximately 80 structurally distinct proteins. This gene encodes a ribosomal protein that is a component of the 60S subunit. The protein belongs to the S39E family of ribosomal proteins. It is located in the cytoplasm. In ra…	hsa03010 (Ribosome), GO:0000184 (nuclear-transcribed mRNA catabolic process, nonsense-mediated decay), GO:0002227 (innate immune response in mucosa), GO:0006364 (rRNA processing), GO:0006412 (translation), GO:0006413 (translational initiation), GO:0006614 (SRP-dependent cotranslational protein targeting to membrane), GO:0019083 (viral transcription), GO:0019731 (antibacterial humoral response), G…		1.23529	0.397682		-0.701397	-0.410264	-0.52131				334.927	63.4758	18.3814	-1.50618	5.06867	42.0077	7.12129e-05	0.0041499	2.47341e-09	2.67062e-09	0.2	0.464103	0.268475	-0.866025	-0.861907	0.0576689	0.0603095		70.5078	38.5733	16.9402	21.1752	19.4583
ENSG00000169375	SIN3A	PC	SIN3 transcription regulator family member A	The protein encoded by this gene is a transcriptional regulatory protein. It contains paired amphipathic helix (PAH) domains, which are important for protein-protein interactions and may mediate repression by the Mad-Max complex. [provided by RefSeq, Jul 2008].	hsa04919 (Thyroid hormone signaling pathway), hsa05016 (Huntington disease), hsa05169 (Epstein-Barr virus infection), hsa05202 (Transcriptional misregulation in cancer), GO:0000122 (negative regulation of transcription from RNA polymerase II promoter), GO:0001701 (in utero embryonic development), GO:0002218 (activation of innate immune response), GO:0002230 (positive regulation of defense respons…		0.801115	0.509213		-0.596459	-0.266632	-0.447236				334.201	53.4404	66.9976	-1.19421	4.47284	41.8703	7.2178e-05	0.00418562	3.23204e-08	3.52011e-08	0.2	0.464103	0.095279	-0.866025	-0.963511	0.0576689	0.00832122		36.7419	29.6453	12.7051	16.4823	14.3076
ENSG00000181588	MEX3D	PC	mex-3 RNA binding family member D		GO:0010609 (mRNA localization resulting in posttranscriptional regulation of gene expression), GO:0061157 (mRNA destabilization), GO:0005634 (nucleus), GO:0048471 (perinuclear region of cytoplasm), GO:0003723 (RNA binding), GO:0008270 (zinc ion binding), GO:0017091 (AU-rich element binding)		-0.530521	-0.573726		0.402068	0.406521	0.295658				333.631	58.8997	83.1328	0.997789	4.78581	41.7624	7.2947e-05	0.00420968	1.15167e-07	1.35347e-07	0.2	0.464103	0.00132122	0.866025	0.992938	0.0576689	0.000711679		17.398	16.8257	35.025	35.1394	32.3924
ENSG00000145287	PLAC8	PC	placenta specific 8		GO:0008284 (positive regulation of cell proliferation), GO:0009409 (response to cold), GO:0040015 (negative regulation of multicellular organism growth), GO:0042742 (defense response to bacterium), GO:0043066 (negative regulation of apoptotic process), GO:0043312 (neutrophil degranulation), GO:0045944 (positive regulation of transcription from RNA polymerase II promoter), GO:0050873 (brown fat ce…		0.511783	0.31482		-0.402607	-0.248177	-0.17582				332.954	95.7857	27.2398	-0.693513	8.27049	41.6346	7.38709e-05	0.0042424	4.11902e-08	4.12079e-08	0.2	0.464103	0.0751163	-0.866025	-0.96157	0.0576689	0.00899135		427.625	372.799	225.945	251.699	264.748
ENSG00000173436	MINOS1	PC	mitochondrial inner membrane organizing system 1		GO:0008150 (biological_process), GO:0005739 (mitochondrion), GO:0005743 (mitochondrial inner membrane), GO:0016021 (integral component of membrane), GO:0003674 (molecular_function), GO:0005515 (protein binding)		-0.350128	-0.547797		0.415979	0.294326	0.187619				332.58	88.2739	34.9794	0.760962	6.97069	41.5639	7.43877e-05	0.00425155	4.03193e-08	3.99834e-08	0.2	0.464103	0.00828891	0.866025	0.961802	0.0576689	0.00891036		94.5446	82.1828	162.191	148.913	138.154
ENSG00000170606	HSPA4	PC	heat shock protein family A (Hsp70) member 4		hsa04530 (Tight junction), hsa04612 (Antigen processing and presentation), GO:0006986 (response to unfolded protein), GO:0045040 (protein import into mitochondrial outer membrane), GO:0051131 (chaperone-mediated protein complex assembly), GO:0005829 (cytosol), GO:0070062 (extracellular vesicular exosome), GO:0005515 (protein binding), GO:0005524 (ATP binding), R-HSA-2262752 (Homo sapiens: Cellula…		0.456941	0.298299		-0.336673	-0.248334	-0.170232				330.185	97.5353	76.3523	-0.632525	8.90449	41.1127	7.77911e-05	0.00439213	9.49241e-08	9.45904e-08	0.2	0.464103	0.0651263	-0.866025	-0.971923	0.0576689	0.0056238		642.125	575.051	369.594	393.058	415.035
ENSG00000111206	FOXM1	PC	forkhead box M1	The protein encoded by this gene is a transcriptional activator involved in cell proliferation. The encoded protein is phosphorylated in M phase and regulates the expression of several cell cycle genes, such as cyclin B1 and cyclin D1. Several transcript variants encoding different isoforms have been found for this gene. [provided by RefSeq, Jul 2011].	hsa04218 (Cellular senescence), GO:0000086 (G2/M transition of mitotic cell cycle), GO:0000122 (negative regulation of transcription from RNA polymerase II promoter), GO:0006281 (DNA repair), GO:0006351 (transcription, DNA-templated), GO:0006978 (DNA damage response, signal transduction by p53 class mediator resulting in transcription of p21 class mediator), GO:0008284 (positive regulation of cel…		-0.313325	-0.412831		0.233809	0.221417	0.27093				330.16	94.3725	72.5498	0.609746	7.92018	41.1079	7.7828e-05	0.00439213	1.68449e-07	1.70849e-07	0.2	0.464103	0.0172187	0.866025	0.994109	0.0576689	0.000542256		190.348	177.529	279.055	276.652	286.381
ENSG00000266993	AL050343.1	antisense					0.56789	0.807163		-0.490906	-0.311222	-0.572925				329.815	41.6302	11.4158	-1.31794	3.80838	41.0432	7.83316e-05	0.00439213	5.62627e-08	6.36497e-08	0.2	0.464103	0.0743593	-0.866025	-0.976846	0.0576689	0.00421463		19.5728	23.4644	8.35563	9.72916	7.78333
ENSG00000182400	TRAPPC6B	PC	trafficking protein particle complex 6B	TRAPPC6B is a component of TRAPP complexes, which are tethering complexes involved in vesicle transport (Kummel et al., 2005 [PubMed 16025134]).[supplied by OMIM, Mar 2008].	GO:0006888 (ER to Golgi vesicle-mediated transport), GO:0043547 (positive regulation of GTPase activity), GO:0048208 (COPII vesicle coating), GO:0061024 (membrane organization), GO:0000139 (Golgi membrane), GO:0005783 (endoplasmic reticulum), GO:0005801 (cis-Golgi network), GO:0005802 (trans-Golgi network), GO:0005829 (cytosol), GO:0030008 (TRAPP complex), GO:0005515 (protein binding), GO:0017112…		0.593223	0.726799		-0.313407	-0.602988	-0.403627				329.746	44.9529	73.0967	-1.23931	3.99187	41.0302	7.84332e-05	0.00439213	6.54684e-08	7.31105e-08	0.2	0.464103	0.0164491	-0.866025	-0.987423	0.0576689	0.00168992		22.7777	25.1814	11.2172	8.81348	10.4159
ENSG00000179564	LSMEM2	PC	leucine rich single-pass membrane protein 2		GO:0016021 (integral component of membrane), GO:0005515 (protein binding)		-0.773205	-0.463112		0.567859	0.317329	0.351129				329.569	61.7766	52.8897	1.10373	4.96251	40.9968	7.86948e-05	0.00439213	3.60587e-08	4.2587e-08	0.2	0.464103	0.00891908	0.866025	0.963307	0.0576689	0.00839088		16.139	20.4885	43.9529	36.6274	37.5431
ENSG00000198804	MT-CO1	PC	mitochondrially encoded cytochrome c oxidase I		hsa00190 (Oxidative phosphorylation), hsa01100 (Metabolic pathways), hsa04260 (Cardiac muscle contraction), hsa04714 (Thermogenesis), hsa04932 (Non-alcoholic fatty liver disease (NAFLD)), hsa05010 (Alzheimer disease), hsa05012 (Parkinson disease), hsa05016 (Huntington disease), R-HSA-1428517 (Homo sapiens: The citric acid (TCA) cycle and respiratory electron transport), R-HSA-1430728 (Homo sapien…		0.434123	0.528783		-0.42777	-0.395267	-0.139869				329.224	99.9832	55.3798	-0.797485	13.4463	40.9321	7.92053e-05	0.00439996	1.83478e-07	1.81826e-07	0.2	0.464103	0.00400417	-0.866025	-0.976561	0.0576689	0.00429244		14486.7	15469.3	7970.13	8151.78	9730.88
ENSG00000106105	GARS	PC	glycyl-tRNA synthetase	This gene encodes glycyl-tRNA synthetase, one of the aminoacyl-tRNA synthetases that charge tRNAs with their cognate amino acids. The encoded enzyme is an (alpha)2 dimer which belongs to the class II family of tRNA synthetases. It has been shown to be a target of autoantibodies in the human autoimmune diseases, polymyositis or dermatomyositis. [provided by RefSeq, Jul 2008]. Publication Note: Thi…	hsa00970 (Aminoacyl-tRNA biosynthesis), GO:0006418 (tRNA aminoacylation for protein translation), GO:0006426 (glycyl-tRNA aminoacylation), GO:0015966 (diadenosine tetraphosphate biosynthetic process), GO:0005737 (cytoplasm), GO:0005759 (mitochondrial matrix), GO:0005829 (cytosol), GO:0030141 (secretory granule), GO:0030424 (axon), GO:0070062 (extracellular vesicular exosome), GO:0004081 (bis(5'-n…		0.428921	0.376303		-0.362208	-0.318181	-0.124835				327.569	91.6386	19.8452	-0.675287	7.40177	40.6218	8.17087e-05	0.00448749	7.74956e-08	7.83197e-08	0.2	0.464103	0.00254221	-0.866025	-0.979424	0.0576689	0.00353207		221.71	213.698	127.28	131.286	150.401
ENSG00000065559	MAP2K4	PC	mitogen-activated protein kinase kinase 4	This gene encodes a member of the mitogen-activated protein kinase (MAPK) family. Members of this family act as an integration point for multiple biochemical signals and are involved in a wide variety of cellular processes such as proliferation, differentiation, transcription regulation, and development. They form a three-tiered signaling module composed of MAPKKKs, MAPKKs, and MAPKs. This protei…	hsa04010 (MAPK signaling pathway), hsa04012 (ErbB signaling pathway), hsa04620 (Toll-like receptor signaling pathway), hsa04664 (Fc epsilon RI signaling pathway), hsa04668 (TNF signaling pathway), hsa04912 (GnRH signaling pathway), hsa04926 (Relaxin signaling pathway), hsa05120 (Epithelial cell signaling in Helicobacter pylori infection), hsa05142 (Chagas disease (American trypanosomiasis)), hsa0…		0.777313	0.490045		-0.52579	-0.393421	-0.348147				327.462	48.6878	48.3638	-1.17955	4.20563	40.6017	8.18738e-05	0.00448749	9.47431e-08	1.04178e-07	0.2	0.464103	0.111105	-0.866025	-0.968494	0.0576689	0.00668133		30.3321	24.4946	11.1027	12.3618	12.8196
ENSG00000168542	COL3A1	PC	collagen type III alpha 1 chain	This gene encodes the pro-alpha1 chains of type III collagen, a fibrillar collagen that is found in extensible connective tissues such as skin, lung, uterus, intestine and the vascular system, frequently in association with type I collagen. Mutations in this gene are associated with Ehlers-Danlos syndrome types IV, and with aortic and arterial aneurysms. Two transcripts, resulting from the use of…	hsa04611 (Platelet activation), hsa04926 (Relaxin signaling pathway), hsa04933 (AGE-RAGE signaling pathway in diabetic complications), hsa04974 (Protein digestion and absorption), hsa05146 (Amoebiasis), GO:0001501 (skeletal system development), GO:0007160 (cell-matrix adhesion), GO:0007179 (transforming growth factor beta receptor signaling pathway), GO:0007229 (integrin-mediated signaling pathwa…		0.557269	0.524882		-0.222002	-0.312742	-0.547407				327.436	64.603	75.6373	-0.94666	5.1322	40.5969	8.19132e-05	0.00448749	6.13673e-08	6.48522e-08	0.2	0.464103	0.00317693	-0.866025	-0.985326	0.0576689	0.00212902		49.5615	48.4169	28.0429	26.2115	21.9765
ENSG00000104549	SQLE	PC	squalene epoxidase	Squalene epoxidase catalyzes the first oxygenation step in sterol biosynthesis and is thought to be one of the rate-limiting enzymes in this pathway. [provided by RefSeq, Jul 2008]. Publication Note: This RefSeq record includes a subset of the publications that are available for this gene. Please see the Gene record to access additional publications.	hsa00100 (Steroid biosynthesis), hsa01100 (Metabolic pathways), GO:0006695 (cholesterol biosynthetic process), GO:0006725 (cellular aromatic compound metabolic process), GO:0008203 (cholesterol metabolic process), GO:0010033 (response to organic substance), GO:0016126 (sterol biosynthetic process), GO:0055114 (oxidation-reduction process), GO:0005783 (endoplasmic reticulum), GO:0005789 (endoplasm…		0.320077	0.803559		-0.331054	-0.486466	-0.306116				326.651	76.2197	40.1026	-0.986472	5.89806	40.4501	8.31346e-05	0.00453351	2.00399e-08	2.03646e-08	0.2	0.464103	0.206152	-0.866025	-0.911159	0.0576689	0.0313605		70.1644	98.8941	43.9529	39.26	44.7541
ENSG00000138758	SEPT11	PC	septin 11	SEPT11 belongs to the conserved septin family of filament-forming cytoskeletal GTPases that are involved in a variety of cellular functions including cytokinesis and vesicle trafficking (Hanai et al., 2004 [PubMed 15196925]; Nagata et al., 2004 [PubMed 15485874]).[supplied by OMIM, Jul 2009]. Publication Note: This RefSeq record includes a subset of the publications that are available for this ge…	hsa05100 (Bacterial invasion of epithelial cells), GO:0007049 (cell cycle), GO:0051291 (protein heterooligomerization), GO:0051301 (cell division), GO:0001725 (stress fiber), GO:0005737 (cytoplasm), GO:0030054 (cell junction), GO:0030424 (axon), GO:0043197 (dendritic spine), GO:0070062 (extracellular vesicular exosome), GO:0005515 (protein binding), GO:0005525 (GTP binding)		0.34745	0.641634		-0.377683	-0.203853	-0.407548				326.363	76.0262	41.3982	-0.856872	5.88023	40.3962	8.35879e-05	0.00453594	5.34775e-08	5.49907e-08	0.2	0.464103	0.128185	-0.866025	-0.950537	0.0576689	0.0131072		71.8813	88.5926	42.6939	48.4169	41.7782
ENSG00000119326	CTNNAL1	PC	catenin alpha like 1		GO:0007155 (cell adhesion), GO:0007266 (Rho protein signal transduction), GO:0005829 (cytosol), GO:0005856 (cytoskeleton), GO:0005886 (plasma membrane), GO:0005515 (protein binding), GO:0045296 (cadherin binding), GO:0051015 (actin filament binding)		0.394311	0.289657		-0.20612	-0.219508	-0.258341				326.139	97.5437	50.1556	-0.573086	8.90456	40.3544	8.39424e-05	0.00453594	2.41295e-07	2.40574e-07	0.2	0.464103	0.0611259	-0.866025	-0.988694	0.0576689	0.00144065		617.973	574.593	406.908	403.131	392.371
ENSG00000251022	THAP9-AS1	antisense	THAP9 antisense RNA 1				0.606775	0.497004		-0.543583	-0.254038	-0.306157				324.68	61.3392	21.0903	-0.975503	4.93794	40.082	8.62934e-05	0.00463627	8.46581e-08	9.00398e-08	0.2	0.464103	0.00662546	-0.866025	-0.983499	0.0576689	0.00253807		44.8686	41.4348	19.1149	23.8078	22.8921
ENSG00000138385	SSB	PC	Sjogren syndrome antigen B	The protein encoded by this gene is involved in diverse aspects of RNA metabolism, including binding and protecting poly(U) termini of nascent RNA polymerase III transcripts from exonuclease digestion, processing 5_ and 3_ ends of pre-tRNA precursors, acting as an RNA chaperone, and binding viral RNAs associated with hepatitis C virus. Autoantibodies reacting with this protein are found in the se…	hsa05322 (Systemic lupus erythematosus), GO:0001682 (tRNA 5'-leader removal), GO:0006400 (tRNA modification), GO:0006409 (tRNA export from nucleus), GO:0008033 (tRNA processing), GO:0008334 (histone mRNA metabolic process), GO:0042780 (tRNA 3'-end processing), GO:0071045 (nuclear histone mRNA catabolic process), GO:0075522 (IRES-dependent viral translational initiation), GO:1903608 (NA), GO:00007…		0.508626	0.2589		-0.249332	-0.251665	-0.26653				324.377	94.7426	18.1122	-0.649902	8.00825	40.0256	8.67897e-05	0.00463627	1.13407e-07	1.1377e-07	0.2	0.464103	0.149405	-0.866025	-0.955286	0.0576689	0.0112736		357.346	300.23	210.493	210.15	207.975
ENSG00000188186	LAMTOR4	PC	late endosomal/lysosomal adaptor, MAPK and MTOR activator 4		hsa04150 (mTOR signaling pathway), GO:0007050 (cell cycle arrest), GO:0008361 (regulation of cell size), GO:0016236 (macroautophagy), GO:0032008 (positive regulation of TOR signaling), GO:0043547 (positive regulation of GTPase activity), GO:0061462 (protein localization to lysosome), GO:0071230 (cellular response to amino acid stimulus), GO:0005764 (lysosome), GO:0005765 (lysosomal membrane), GO:…		-0.565388	-0.333395		0.430161	0.282808	0.185814				324.268	90.7049	5.29149	0.758476	7.26546	40.0054	8.69691e-05	0.00463627	5.39603e-08	5.4299e-08	0.2	0.464103	0.0127339	0.866025	0.95413	0.0576689	0.0117114		99.6953	117.437	200.764	181.077	169.173
ENSG00000134480	CCNH	PC	cyclin H	The protein encoded by this gene belongs to the highly conserved cyclin family, whose members are characterized by a dramatic periodicity in protein abundance through the cell cycle. Cyclins function as regulators of CDK kinases. Different cyclins exhibit distinct expression and degradation patterns which contribute to the temporal coordination of each mitotic event. This cyclin forms a complex w…	hsa03022 (Basal transcription factors), hsa03420 (Nucleotide excision repair), hsa04110 (Cell cycle), GO:0000082 (G1/S transition of mitotic cell cycle), GO:0000086 (G2/M transition of mitotic cell cycle), GO:0006283 (transcription-coupled nucleotide-excision repair), GO:0006294 (nucleotide-excision repair, preincision complex assembly), GO:0006361 (transcription initiation from RNA polymerase I …		0.627879	0.285398		-0.350375	-0.373219	-0.189683				323.47	90.5619	28.1652	-0.778811	7.25468	39.8568	8.82967e-05	0.00468603	3.98264e-08	4.01568e-08	0.2	0.464103	0.165387	-0.866025	-0.931268	0.0576689	0.0214062		227.662	179.131	114.575	112.744	128.31
ENSG00000164941	INTS8	PC	integrator complex subunit 8	This gene encodes a subunit of the Integrator complex which is involved in the cleavage of small nuclear RNAs U1 and U2 within the nucleus. The encoded protein associates with RNA polymerase II and is recruited to the U1 and U2 small nuclear RNA genes. Alternative splicing results in multiple transcript variants. [provided by RefSeq, Nov 2012].	GO:0016180 (snRNA processing), GO:0042795 (snRNA transcription from RNA polymerase II promoter), GO:0005654 (nucleoplasm), GO:0032039 (integrator complex), GO:0005515 (protein binding), R-HSA-6807505 (Homo sapiens: RNA polymerase II transcribes snRNA genes), R-HSA-74160 (Homo sapiens: Gene Expression)		0.520007	0.788329		-0.45581	-0.54114	-0.311385				322.471	44.9108	47.6319	-1.23587	3.98979	39.6711	8.99914e-05	0.00475474	1.11919e-07	1.24511e-07	0.2	0.464103	0.095118	-0.866025	-0.9716	0.0576689	0.0057208		21.5186	26.326	9.95808	9.27132	11.2172
ENSG00000234176	HSPA8P1	p_Pg	heat shock protein family A (Hsp70) member 8 pseudogene 1				1.18116	0.523655		-0.800716	-0.33635	-0.567747				321.345	41.4199	67.4266	-1.67447	3.79892	39.4622	9.19445e-05	0.00483645	1.96456e-08	2.25735e-08	0.2	0.464103	0.209887	-0.866025	-0.904141	0.0576689	0.0351106		28.9586	17.627	5.8375	8.81348	7.21103
ENSG00000124383	MPHOSPH10	PC	M-phase phosphoprotein 10	This gene encodes a protein that is phosphorylated during mitosis. The protein localizes to the nucleolus during interphase and to the chromosomes during M phase. The protein associates with the U3 small nucleolar ribonucleoprotein 60-80S complexes and may be involved in pre-rRNA processing. [provided by RefSeq, Dec 2010].	hsa03008 (Ribosome biogenesis in eukaryotes), GO:0000375 (RNA splicing, via transesterification reactions), GO:0006364 (rRNA processing), GO:0006396 (RNA processing), GO:0008380 (RNA splicing), GO:0010923 (negative regulation of phosphatase activity), GO:0030490 (maturation of SSU-rRNA), GO:0005654 (nucleoplasm), GO:0005694 (chromosome), GO:0005730 (nucleolus), GO:0005732 (small nucleolar ribonuc…		0.957773	0.353492		-0.436265	-0.497188	-0.377811				320.808	61.4822	48.8769	-1.1982	4.94546	39.3626	9.28935e-05	0.00486484	3.50748e-08	3.73425e-08	0.2	0.464103	0.231234	-0.866025	-0.896321	0.0576689	0.0394454		56.2002	36.2841	20.1451	19.2294	21.0608
ENSG00000164172	MOCS2	PC	molybdenum cofactor synthesis 2	Eukaryotic molybdoenzymes use a unique molybdenum cofactor (MoCo) consisting of a pterin, termed molybdopterin, and the catalytically active metal molybdenum. MoCo is synthesized from precursor Z by the heterodimeric enzyme molybdopterin synthase. The large and small subunits of molybdopterin synthase are both encoded from this gene by overlapping open reading frames. The proteins were initially …	hsa00790 (Folate biosynthesis), hsa01100 (Metabolic pathways), hsa04122 (Sulfur relay system), GO:0006777 (Mo-molybdopterin cofactor biosynthetic process), GO:0032324 (molybdopterin cofactor biosynthetic process), GO:0005634 (nucleus), GO:0005829 (cytosol), GO:0016607 (nuclear speck), GO:0019008 (molybdopterin synthase complex), GO:0030366 (molybdopterin synthase activity), R-HSA-1430728 (Homo sa…		0.524251	0.338145		-0.393461	-0.301188	-0.167747				320.342	83.6053	53.0916	-0.73444	6.49094	39.2764	9.37245e-05	0.00488683	1.07648e-07	1.10208e-07	0.2	0.464103	0.0649097	-0.866025	-0.966754	0.0576689	0.00724056		125.678	110.226	65.586	70.05	77.0321
ENSG00000179222	MAGED1	PC	MAGE family member D1	This gene is a member of the melanoma antigen gene (MAGE) family. Most of the genes of this family encode tumor specific antigens that are not expressed in normal adult tissues except testis. Although the protein encoded by this gene shares strong homology with members of the MAGE family, it is expressed in almost all normal adult tissues. This gene has been demonstrated to be involved in the p75…	hsa04722 (Neurotrophin signaling pathway), GO:0006355 (regulation of transcription, DNA-templated), GO:0006357 (regulation of transcription from RNA polymerase II promoter), GO:0032922 (circadian regulation of gene expression), GO:0042752 (regulation of circadian rhythm), GO:0042981 (regulation of apoptotic process), GO:0043406 (positive regulation of MAP kinase activity), GO:0045892 (negative re…		-0.377444	-0.358871		0.262334	0.169423	0.304558				320.055	91.2012	78.4302	0.622755	7.34318	39.2233	9.42413e-05	0.00489232	2.84156e-07	2.85597e-07	0.2	0.464103	0.00532925	0.866025	0.984612	0.0576689	0.00228623		121.672	123.274	190.692	178.673	196.415
ENSG00000165732	DDX21	PC	DExD-box helicase 21	DEAD box proteins, characterized by the conserved motif Asp-Glu-Ala-Asp (DEAD), are putative RNA helicases. They are implicated in a number of cellular processes involving alteration of RNA secondary structure such as translation initiation, nuclear and mitochondrial splicing, and ribosome and spliceosome assembly. Based on their distribution patterns, some members of this family are believed to …	GO:0001649 (osteoblast differentiation), GO:0006364 (rRNA processing), GO:0006366 (transcription from RNA polymerase II promoter), GO:0009615 (response to virus), GO:0010501 (RNA secondary structure unwinding), GO:0043330 (response to exogenous dsRNA), GO:0045815 (positive regulation of gene expression, epigenetic), GO:0005634 (nucleus), GO:0005654 (nucleoplasm), GO:0005730 (nucleolus), GO:001602…		0.277732	0.838381		-0.365852	-0.399407	-0.350854				319.457	80.2406	97.8632	-0.983209	6.19575	39.1126	9.53284e-05	0.004921	2.38015e-08	2.40902e-08	0.2	0.464103	0.239702	-0.866025	-0.890305	0.0576689	0.0428883		83.5563	124.19	52.7664	51.5073	53.3387
ENSG00000276259	AC009118.3	antisense					0.624468	0.375382		-0.436198	-0.378831	-0.18482				319.137	72.6363	16.5727	-0.867668	5.64705	39.0535	9.59152e-05	0.004921	9.39871e-08	9.70452e-08	0.2	0.464103	0.0933104	-0.866025	-0.95888	0.0576689	0.00994753		74.5139	62.3811	34.6816	36.1696	41.6637
ENSG00000122042	UBL3	PC	ubiquitin like 3		GO:0005622 (intracellular), GO:0005886 (plasma membrane), GO:0070062 (extracellular vesicular exosome)		0.523587	0.606529		-0.427816	-0.157616	-0.544684				319.071	63.6272	96.9126	-0.988673	5.07847	39.0414	9.60358e-05	0.004921	7.39054e-08	7.81657e-08	0.2	0.464103	0.00266723	-0.866025	-0.9778	0.0576689	0.00395749		46.3566	49.2181	23.0066	28.1573	21.0608
ENSG00000109220	CHIC2	PC	cysteine rich hydrophobic domain 2	This gene encodes a member of the CHIC family of proteins. The encoded protein contains a cysteine-rich hydrophobic (CHIC) motif, and is localized to vesicular structures and the plasma membrane. This gene is associated with some cases of acute myeloid leukemia. [provided by RefSeq, Jul 2008].	GO:0006893 (Golgi to plasma membrane transport), GO:0008150 (biological_process), GO:0005575 (cellular_component), GO:0005798 (Golgi-associated vesicle), GO:0005886 (plasma membrane), GO:0003674 (molecular_function), GO:0005515 (protein binding)		0.500184	0.460615		-0.182121	-0.342863	-0.435815				316.333	68.7332	10.5241	-0.834891	5.38468	38.5368	0.000101234	0.0051651	2.02726e-07	2.11877e-07	0.2	0.464103	0.00168753	-0.866025	-0.987009	0.0576689	0.00177397		57.2304	55.6279	34.9105	31.0189	28.9586
ENSG00000234545	FAM133B	PC	family with sequence similarity 133 member B		GO:0003723 (RNA binding)		0.869174	0.749392		-0.40685	-0.931041	-0.280676				315.506	43.3294	31.8836	-1.51348	3.90635	38.3848	0.000102865	0.0052074	2.27869e-08	2.58962e-08	0.2	0.464103	0.00300864	-0.866025	-0.978365	0.0576689	0.00380768		25.2958	23.1211	9.27132	5.8375	10.3015
ENSG00000116171	SCP2	PC	sterol carrier protein 2	This gene encodes two proteins: sterol carrier protein X (SCPx) and sterol carrier protein 2 (SCP2), as a result of transcription initiation from 2 independently regulated promoters. The transcript initiated from the proximal promoter encodes the longer SCPx protein, and the transcript initiated from the distal promoter encodes the shorter SCP2 protein, with the 2 proteins sharing a common C-term…	hsa00120 (Primary bile acid biosynthesis), hsa01040 (Biosynthesis of unsaturated fatty acids), hsa01100 (Metabolic pathways), hsa01212 (Fatty acid metabolism), hsa03320 (PPAR signaling pathway), hsa04146 (Peroxisome), GO:0006694 (steroid biosynthetic process), GO:0006699 (bile acid biosynthetic process), GO:0007031 (peroxisome organization), GO:0015914 (phospholipid transport), GO:0015918 (sterol…		0.451234	0.373679		-0.403706	-0.283954	-0.137253				315.313	87.1046	61.5126	-0.695682	6.82712	38.3494	0.00010325	0.0052074	1.55677e-07	1.58558e-07	0.2	0.464103	0.00327894	-0.866025	-0.977061	0.0576689	0.00415614		151.088	143.076	82.6406	89.9661	99.8098
ENSG00000111011	RSRC2	PC	arginine and serine rich coiled-coil 2		GO:0003723 (RNA binding)		0.478043	0.329593		-0.352141	-0.189404	-0.266091				315.249	82.5034	39.2025	-0.68924	6.38862	38.3377	0.000103377	0.0052074	2.45268e-07	2.5236e-07	0.2	0.464103	0.0552535	-0.866025	-0.977486	0.0576689	0.00404159		113.888	102.557	63.1823	70.9657	67.1884
ENSG00000171155	C1GALT1C1	PC	C1GALT1 specific chaperone 1	This gene encodes a type II transmembrane protein that is similar to the core 1 beta1,3-galactosyltransferase 1, which catalyzes the synthesis of the core-1 structure, also known as Thomsen-Friedenreich antigen, on O-linked glycans. This gene product lacks the galactosyltransferase activity itself, but instead acts as a molecular chaperone required for the folding, stability and full activity of …	hsa00512 (Mucin type O-glycan biosynthesis), hsa01100 (Metabolic pathways), GO:0006493 (protein O-linked glycosylation), GO:0016266 (O-glycan processing), GO:0016267 (O-glycan processing, core 1), GO:0030168 (platelet activation), GO:0036344 (platelet morphogenesis), GO:0000139 (Golgi membrane), GO:0016021 (integral component of membrane), GO:0070062 (extracellular vesicular exosome), GO:0005515 …		0.494047	0.506071		-0.281052	-0.40316	-0.315906				314.419	59.8082	55.9519	-0.890731	4.83755	38.1854	0.000105053	0.00526229	3.88342e-07	4.13192e-07	0.2	0.464103	0.000451982	-0.866025	-0.997382	0.0576689	0.000160779		39.0311	39.3745	21.9765	20.0306	21.4042
ENSG00000132561	MATN2	PC	matrilin 2	This gene encodes a member of the von Willebrand factor A domain containing protein family. This family of proteins is thought to be involved in the formation of filamentous networks in the extracellular matrices of various tissues. This protein contains five von Willebrand factor A domains. The specific function of this gene has not yet been determined. Two transcript variants encoding different…	GO:0001764 (neuron migration), GO:0007411 (axon guidance), GO:0008150 (biological_process), GO:0008347 (glial cell migration), GO:0031104 (dendrite regeneration), GO:0048678 (response to axon injury), GO:0005578 (proteinaceous extracellular matrix), GO:0005604 (basement membrane), GO:0005615 (extracellular space), GO:0031012 (extracellular matrix), GO:0003674 (molecular_function), GO:0005509 (cal…		0.309094	0.402019		-0.208465	-0.199978	-0.302671				314.139	90.9404	59.931	-0.599933	7.30839	38.1341	0.000105626	0.00526229	3.94646e-07	4.00135e-07	0.2	0.464103	0.0282761	-0.866025	-0.987692	0.0576689	0.00163613		192.408	205.343	133.805	134.606	125.22
ENSG00000092108	SCFD1	PC	sec1 family domain containing 1		GO:0000902 (cell morphogenesis), GO:0001666 (response to hypoxia), GO:0006890 (retrograde vesicle-mediated transport, Golgi to ER), GO:0006892 (post-Golgi vesicle-mediated transport), GO:0006904 (vesicle docking involved in exocytosis), GO:0006909 (phagocytosis), GO:0009636 (response to toxic substance), GO:0015031 (protein transport), GO:0048208 (COPII vesicle coating), GO:0051223 (regulation of…		0.532868	0.326255		-0.259317	-0.283831	-0.315974				314.056	75.286	29.9571	-0.744398	5.83235	38.119	0.000105795	0.00526229	3.1581e-07	3.28199e-07	0.2	0.464103	0.111934	-0.866025	-0.972765	0.0576689	0.00537322		80.3514	69.3632	45.5554	44.7541	43.724
ENSG00000155438	NIFK	PC	nucleolar protein interacting with the FHA domain of MKI67	This gene encodes a protein that interacts with the forkhead-associated domain of the Ki-67 antigen. The encoded protein may bind RNA and may play a role in mitosis and cell cycle progression. Multiple pseudogenes exist on chromosomes 5, 10, 12, 15, and 19.[provided by RefSeq, Jan 2009].	GO:0006461 (protein complex assembly), GO:0009303 (rRNA transcription), GO:0010923 (negative regulation of phosphatase activity), GO:0016072 (rRNA metabolic process), GO:0000794 (condensed nuclear chromosome), GO:0005654 (nucleoplasm), GO:0005730 (nucleolus), GO:0005737 (cytoplasm), GO:0003723 (RNA binding), GO:0005515 (protein binding)		0.327389	0.64185		-0.269083	-0.265449	-0.434706				313.82	74.6467	14.8145	-0.84338	5.7888	38.0758	0.000106281	0.00526444	1.34129e-07	1.38186e-07	0.2	0.464103	0.145488	-0.866025	-0.945708	0.0576689	0.0150615		66.6161	83.3274	43.3806	43.4951	38.4588
ENSG00000237765	FAM200B	PC	family with sequence similarity 200 member B		GO:0006357 (regulation of transcription from RNA polymerase II promoter), GO:0005654 (nucleoplasm), GO:0005737 (cytoplasm), GO:0000981 (sequence-specific DNA binding RNA polymerase II transcription factor activity), GO:0003677 (DNA binding)		0.799452	0.430144		-0.385298	-0.207149	-0.637149				313.39	66.0414	26.0284	-1.08159	5.21988	37.997	0.000107174	0.00528664	5.088e-08	5.35626e-08	0.2	0.464103	0.127909	-0.866025	-0.937381	0.0576689	0.0186324		61.351	47.0434	25.8681	29.5309	21.4042
ENSG00000178397	FAM220A	PC	family with sequence similarity 220 member A		GO:0000122 (negative regulation of transcription from RNA polymerase II promoter), GO:0006470 (protein dephosphorylation), GO:0032092 (positive regulation of protein binding), GO:0005634 (nucleus), GO:0097677 (NA)		0.658944	1.20287		-0.267914	-0.892265	-0.701631				313.03	29.677	26.2219	-1.96281	3.13971	37.9311	0.000107926	0.00530176	1.46157e-08	1.8048e-08	0.2	0.464103	0.158815	-0.866025	-0.929889	0.0576689	0.022049		12.2473	18.7716	5.49411	2.86152	3.54828
ENSG00000257727	CNPY2	PC	canopy FGF signaling regulator 2		GO:0007167 (enzyme linked receptor protein signaling pathway), GO:0009888 (tissue development), GO:0010629 (negative regulation of gene expression), GO:0010988 (regulation of low-density lipoprotein particle clearance), GO:0045716 (positive regulation of low-density lipoprotein particle receptor biosynthetic process), GO:0005783 (endoplasmic reticulum), GO:0005887 (integral component of plasma me…		-0.664933	-0.50489		0.500881	0.497104	0.171837				312.092	61.6083	10.2213	1.05442	4.95188	37.7598	0.000109914	0.00534666	1.53886e-07	1.80019e-07	0.2	0.464103	0.0129552	0.866025	0.947646	0.0576689	0.0142667		17.5125	19.8017	41.7782	41.6637	32.8502
ENSG00000170396	ZNF804A	PC	zinc finger protein 804A		GO:0003676 (nucleic acid binding), GO:0046872 (metal ion binding)		0.644933	0.531488		-0.501501	-0.396721	-0.2782				311.775	49.142	96.7948	-1.08484	4.22872	37.7019	0.000110597	0.00534666	3.18779e-07	3.48427e-07	0.2	0.464103	0.014736	-0.866025	-0.989539	0.0576689	0.0012824		28.2718	25.9826	11.675	12.7051	13.9642
ENSG00000101558	VAPA	PC	VAMP associated protein A	The protein encoded by this gene is a type IV membrane protein. It is present in the plasma membrane and intracellular vesicles. It may also be associated with the cytoskeleton. This protein may function in vesicle trafficking, membrane fusion, protein complex assembly and cell motility. Alternative splicing occurs at this locus and two transcript variants encoding distinct isoforms have been ide…	hsa04979 (Cholesterol metabolism), GO:0006888 (ER to Golgi vesicle-mediated transport), GO:0007165 (signal transduction), GO:0008219 (cell death), GO:0030148 (sphingolipid biosynthetic process), GO:0031175 (neuron projection development), GO:0043123 (positive regulation of I-kappaB kinase/NF-kappaB signaling), GO:0043312 (neutrophil degranulation), GO:0044791 (positive regulation by host of viral…		0.439921	0.428903		-0.482231	-0.286536	-0.100058				311.631	95.5501	65.9881	-0.720367	8.21177	37.6756	0.000110909	0.00534666	9.73659e-08	9.73349e-08	0.2	0.464103	0.0133285	-0.866025	-0.966493	0.0576689	0.00732546		389.166	386.19	204.427	234.416	267.037
ENSG00000198818	SFT2D1	PC	SFT2 domain containing 1		GO:0015031 (protein transport), GO:0016192 (vesicle-mediated transport), GO:0016020 (membrane), GO:0016021 (integral component of membrane)		0.439946	0.648908		-0.493041	-0.23196	-0.363853				311.518	60.1026	37.0068	-0.970098	4.8582	37.655	0.000111153	0.00534666	2.20817e-07	2.34739e-07	0.2	0.464103	0.0656884	-0.866025	-0.972312	0.0576689	0.00550752		37.6576	43.8385	18.7716	22.8921	20.7174
ENSG00000258644	SYNJ2BP-COX16	PC	SYNJ2BP-COX16 readthrough	This locus represents naturally occurring read-through transcription between the neighboring SYNJ2BP (synaptojanin 2 binding protein) and COX16 (COX16 cytochrome c oxidase assembly homolog (S. cerevisiae)) genes on chromosome 14. The read-through transcript produces a fusion protein that shares sequence identity with each individual gene product. Alternate splicing results in multiple transcript …			-0.427534	-0.739125		0.667278	0.268997	0.230383				311.483	84.9428	6.41878	1.00074	6.60763	37.6486	0.000111229	0.00534666	2.96266e-08	2.96565e-08	0.2	0.464103	0.0257003	0.866025	0.901525	0.0576689	0.0365428		67.5318	54.0255	146.51	110.684	107.708
ENSG00000240344	PPIL3	PC	peptidylprolyl isomerase like 3	This gene encodes a member of the cyclophilin family. Cyclophilins catalyze the cis-trans isomerization of peptidylprolyl imide bonds in oligopeptides. They have been proposed to act either as catalysts or as molecular chaperones in protein-folding events. Alternative splicing results in multiple transcript variants. [provided by RefSeq, Sep 2008].	GO:0000398 (mRNA splicing, via spliceosome), GO:0000413 (protein peptidyl-prolyl isomerization), GO:0006457 (protein folding), GO:0071013 (catalytic step 2 spliceosome), GO:0003755 (peptidyl-prolyl cis-trans isomerase activity), GO:0005515 (protein binding)		0.549167	0.40814		-0.41324	-0.304402	-0.239666				311.112	65.6292	11.3569	-0.841019	5.19575	37.5809	0.000112039	0.00534666	3.63553e-07	3.81732e-07	0.2	0.464103	0.0422379	-0.866025	-0.983822	0.0576689	0.00246416		52.0796	47.0434	25.7537	27.9284	29.3019
ENSG00000137500	CCDC90B	PC	coiled-coil domain containing 90B		GO:0005739 (mitochondrion), GO:0016021 (integral component of membrane), GO:0031966 (mitochondrial membrane), GO:0005515 (protein binding)		0.369823	0.503632		-0.322101	-0.308574	-0.242781				310.931	70.2978	40.4896	-0.760879	5.50082	37.548	0.000112434	0.00534666	5.03483e-07	5.27629e-07	0.2	0.464103	0.0626255	-0.866025	-0.987185	0.0576689	0.00173802		56.887	62.61	34.4527	34.7961	36.513
ENSG00000140365	COMMD4	PC	COMM domain containing 4		GO:0006351 (transcription, DNA-templated), GO:0006355 (regulation of transcription, DNA-templated), GO:0005634 (nucleus), GO:0005737 (cytoplasm), GO:0005515 (protein binding)		-0.462342	-0.295807		0.273651	0.274641	0.209857				310.929	89.502	29.6542	0.639395	7.12227	37.5477	0.000112438	0.00534666	3.79191e-07	3.80327e-07	0.2	0.464103	0.0390317	0.866025	0.986678	0.0576689	0.00184206		98.0928	110.34	164.709	164.823	157.498
ENSG00000111237	VPS29	PC	VPS29, retromer complex component	This gene belongs to a group of vacuolar protein sorting (VPS) genes that, when functionally impaired, disrupt the efficient delivery of vacuolar hydrolases. The protein encoded by this gene is a component of a large multimeric complex, termed the retromer complex, which is involved in retrograde transport of proteins from endosomes to the trans-Golgi network. This VPS protein may be involved in …	hsa04144 (Endocytosis), GO:0015031 (protein transport), GO:0016055 (Wnt signaling pathway), GO:0042147 (retrograde transport, endosome to Golgi), GO:1990126 (retrograde transport, endosome to plasma membrane), GO:0005768 (endosome), GO:0005769 (early endosome), GO:0005770 (late endosome), GO:0005829 (cytosol), GO:0010008 (endosome membrane), GO:0030904 (retromer complex), GO:0030906 (retromer com…		0.414119	0.420902		-0.327118	-0.408956	-0.0989473				310.713	90.1666	18.2384	-0.698946	7.215	37.5083	0.000112914	0.00534789	1.53358e-07	1.55048e-07	0.2	0.464103	0.0110722	-0.866025	-0.972481	0.0576689	0.00545748		192.294	193.21	114.232	107.822	134.148
ENSG00000126787	DLGAP5	PC	DLG associated protein 5		GO:0006470 (protein dephosphorylation), GO:0007079 (mitotic chromosome movement towards spindle pole), GO:0008283 (cell proliferation), GO:0023052 (signaling), GO:0045842 (positive regulation of mitotic metaphase/anaphase transition), GO:0005634 (nucleus), GO:0005739 (mitochondrion), GO:0005815 (microtubule organizing center), GO:0005829 (cytosol), GO:0031616 (spindle pole centrosome), GO:0004721…		0.544574	0.327566		-0.18834	-0.358093	-0.325706				309.74	77.9862	60.0909	-0.751113	6.02318	37.3311	0.000115087	0.00541201	2.69738e-07	2.78451e-07	0.2	0.464103	0.0968251	-0.866025	-0.964401	0.0576689	0.00801961		92.2553	79.0924	54.7122	48.4169	49.5615
ENSG00000203865	ATP1A1-AS1	processed_transcript	ATP1A1 antisense RNA 1				0.61021	0.412344		-0.596807	-0.272672	-0.153075				309.699	86.0279	18.4151	-0.859487	6.72311	37.3238	0.000115178	0.00541201	5.55987e-08	5.62359e-08	0.2	0.464103	0.03322	-0.866025	-0.952583	0.0576689	0.0123062		154.293	134.262	65.7005	82.7551	90.0806
ENSG00000273841	TAF9	PC	TATA-box binding protein associated factor 9	Initiation of transcription by RNA polymerase II requires the activities of more than 70 polypeptides. The protein that coordinates these activities is transcription factor IID (TFIID), which binds to the core promoter to position the polymerase properly, serves as the scaffold for assembly of the remainder of the transcription complex, and acts as a channel for regulatory signals. TFIID is compo…	hsa03022 (Basal transcription factors), GO:0000492 (box C/D snoRNP assembly), GO:0006366 (transcription from RNA polymerase II promoter), GO:0006367 (transcription initiation from RNA polymerase II promoter), GO:0006368 (transcription elongation from RNA polymerase II promoter), GO:0006974 (cellular response to DNA damage stimulus), GO:0030307 (positive regulation of cell growth), GO:0032435 (neg…		0.412396	0.685112		-0.601973	-0.404168	-0.0913675				309.182	91.605	23.7066	-0.916272	7.3957	37.2298	0.000116351	0.00544392	3.20426e-08	3.2155e-08	0.2	0.464103	0.0660516	-0.866025	-0.936661	0.0576689	0.0189527		211.981	256.506	103.93	119.497	148.913
ENSG00000128989	ARPP19	PC	cAMP regulated phosphoprotein 19	The 19-kD cAMP-regulated phosphoprotein plays a role in regulating mitosis by inhibiting protein phosphatase-2A (PP2A; see MIM 176915) (summary by Gharbi-Ayachi et al., 2010 [PubMed 21164014]).[supplied by OMIM, Feb 2011].	GO:0000086 (G2/M transition of mitotic cell cycle), GO:0007067 (mitotic nuclear division), GO:0035308 (negative regulation of protein dephosphorylation), GO:0043086 (negative regulation of catalytic activity), GO:0045722 (positive regulation of gluconeogenesis), GO:0046326 (positive regulation of glucose import), GO:0051301 (cell division), GO:0005654 (nucleoplasm), GO:0005737 (cytoplasm), GO:000…		0.418096	0.40489		-0.215355	-0.253234	-0.354398				308.998	75.0084	58.7869	-0.70867	5.81368	37.1963	0.000116773	0.00544392	5.42304e-07	5.65631e-07	0.2	0.464103	0.00128369	-0.866025	-0.994431	0.0576689	0.000498411		73.3693	72.6826	46.5855	45.3264	42.1215
ENSG00000087302	RTRAF	PC	RNA transcription, translation and transport factor		GO:0006351 (transcription, DNA-templated), GO:0006388 (tRNA splicing, via endonucleolytic cleavage and ligation), GO:0016032 (viral process), GO:0045944 (positive regulation of transcription from RNA polymerase II promoter), GO:0050658 (RNA transport), GO:0005634 (nucleus), GO:0005654 (nucleoplasm), GO:0005737 (cytoplasm), GO:0005815 (microtubule organizing center), GO:0005829 (cytosol), GO:00484…		0.625997	0.274715		-0.444621	-0.274249	-0.181841				308.349	96.7278	57.8868	-0.761157	8.55706	37.0784	0.000118273	0.00549229	8.7737e-08	8.74944e-08	0.2	0.464103	0.165179	-0.866025	-0.922247	0.0576689	0.0257206		559.942	438.499	265.549	299.086	319.002
ENSG00000155975	VPS37A	PC	VPS37A, ESCRT-I subunit	This gene belongs to the VPS37 family, and encodes a component of the ESCRT-I (endosomal sorting complex required for transport I) protein complex, required for the sorting of ubiquitinated transmembrane proteins into internal vesicles of multivesicular bodies. Expression of this gene is downregulated in hepatocellular carcinoma, and mutations in this gene are associated with autosomal recessive …	hsa04144 (Endocytosis), GO:0015031 (protein transport), GO:0016197 (endosomal transport), GO:0016236 (macroautophagy), GO:0019058 (viral life cycle), GO:0036258 (multivesicular body assembly), GO:0039702 (viral budding via host ESCRT complex), GO:0043162 (ubiquitin-dependent protein catabolic process via the multivesicular body sorting pathway), GO:0075733 (intracellular transport of virus), GO:0…		0.64577	0.558999		-0.704397	-0.362992	-0.13738				306.773	69.6669	53.1253	-1.0316	5.45035	36.793	0.000121999	0.0056433	5.8888e-08	6.15197e-08	0.2	0.464103	0.00537638	-0.866025	-0.966418	0.0576689	0.00735017		64.6703	60.7786	24.1512	31.1333	36.7419
ENSG00000165487	MICU2	PC	mitochondrial calcium uptake 2		GO:0006851 (mitochondrial calcium ion transport), GO:0036444 (calcium ion transmembrane import into mitochondrion), GO:0051560 (mitochondrial calcium ion homeostasis), GO:0051561 (positive regulation of mitochondrial calcium ion concentration), GO:0051562 (negative regulation of mitochondrial calcium ion concentration), GO:0005634 (nucleus), GO:0005739 (mitochondrion), GO:0005743 (mitochondrial i…		0.294139	0.758515		-0.378681	-0.262731	-0.411242				306.325	74.285	26.0873	-0.927206	5.76774	36.7119	0.000123085	0.00567143	1.1549e-07	1.18065e-07	0.2	0.464103	0.208306	-0.866025	-0.910762	0.0576689	0.0315688		63.4112	88.2492	39.0311	42.4649	38.1154
ENSG00000113407	TARS	PC	threonyl-tRNA synthetase	Aminoacyl-tRNA synthetases catalyze the aminoacylation of tRNA by their cognate amino acid. Because of their central role in linking amino acids with nucleotide triplets contained in tRNAs, aminoacyl-tRNA synthetases are thought to be among the first proteins that appeared in evolution. Threonyl-tRNA synthetase belongs to the class-II aminoacyl-tRNA synthetase family [provided by RefSeq, Jul 2008…	hsa00970 (Aminoacyl-tRNA biosynthesis), GO:0006412 (translation), GO:0006418 (tRNA aminoacylation for protein translation), GO:0006435 (threonyl-tRNA aminoacylation), GO:0005737 (cytoplasm), GO:0005829 (cytosol), GO:0015629 (actin cytoskeleton), GO:0070062 (extracellular vesicular exosome), GO:0004829 (threonine-tRNA ligase activity), GO:0005515 (protein binding), GO:0005524 (ATP binding), GO:004…		0.43938	0.263706		-0.242291	-0.277084	-0.183711				306.023	94.9361	46.799	-0.592409	8.05109	36.6572	0.000123822	0.00568336	5.24896e-07	5.26435e-07	0.2	0.464103	0.102611	-0.866025	-0.97033	0.0576689	0.0061075		352.425	311.791	218.963	213.698	228.12
ENSG00000261604	AC114947.2	antisense					0.380829	0.540415		-0.26889	-0.367491	-0.284863				304.58	65.9909	47.0009	-0.810363	5.21633	36.3968	0.00012741	0.00582556	6.55615e-07	6.8703e-07	0.2	0.464103	0.0725139	-0.866025	-0.983317	0.0576689	0.00258031		46.9289	52.6519	29.1875	27.1272	28.8441
ENSG00000120837	NFYB	PC	nuclear transcription factor Y subunit beta	The protein encoded by this gene is one subunit of a trimeric complex, forming a highly conserved transcription factor that binds with high specificity to CCAAT motifs in the promoter regions in a variety of genes. This gene product, subunit B, forms a tight dimer with the C subunit, a prerequisite for subunit A association. The resulting trimer binds to DNA with high specificity and affinity. Su…	hsa04612 (Antigen processing and presentation), hsa05152 (Tuberculosis), hsa05166 (Human T-cell leukemia virus 1 infection), GO:0006351 (transcription, DNA-templated), GO:0006355 (regulation of transcription, DNA-templated), GO:0045893 (positive regulation of transcription, DNA-templated), GO:0005634 (nucleus), GO:0005654 (nucleoplasm), GO:0016602 (CCAAT-binding factor complex), GO:0032993 (prote…		0.517958	0.458265		-0.122633	-0.374857	-0.478733				304.37	73.3429	51.4175	-0.836944	5.69183	36.3589	0.000127941	0.00582745	2.15087e-07	2.22163e-07	0.2	0.464103	0.00408558	-0.866025	-0.974084	0.0576689	0.00498881		71.4235	68.4475	45.0975	37.5431	34.7961
ENSG00000142937	RPS8	PC	ribosomal protein S8	Ribosomes, the organelles that catalyze protein synthesis, consist of a small 40S subunit and a large 60S subunit. Together these subunits are composed of 4 RNA species and approximately 80 structurally distinct proteins. This gene encodes a ribosomal protein that is a component of the 40S subunit. The protein belongs to the S8E family of ribosomal proteins. It is located in the cytoplasm. Increa…	hsa03010 (Ribosome), GO:0000184 (nuclear-transcribed mRNA catabolic process, nonsense-mediated decay), GO:0000462 (maturation of SSU-rRNA from tricistronic rRNA transcript (SSU-rRNA, 5.8S rRNA, LSU-rRNA)), GO:0006364 (rRNA processing), GO:0006412 (translation), GO:0006413 (translational initiation), GO:0006614 (SRP-dependent cotranslational protein targeting to membrane), GO:0019083 (viral transc…		-0.386835	-0.314118		0.299154	0.174902	0.226897				303.851	99.6215	13.7377	0.585181	10.991	36.2655	0.000129265	0.00586529	1.345e-06	1.39959e-06	0.2	0.464103	0.00160736	0.866025	0.984129	0.0576689	0.00239439		1525.76	1604.74	2455.87	2253.04	2335.8
ENSG00000113369	ARRDC3	PC	arrestin domain containing 3		GO:0001659 (temperature homeostasis), GO:0031651 (negative regulation of heat generation), GO:0043588 (skin development), GO:0044252 (negative regulation of multicellular organismal metabolic process), GO:0051443 (positive regulation of ubiquitin-protein transferase activity), GO:0060613 (fat pad development), GO:0071879 (positive regulation of adrenergic receptor signaling pathway), GO:0090327 (…		0.816299	0.844943		-0.475498	-0.231696	-0.954048				303.34	39.4011	28.0811	-1.583	3.68542	36.1735	0.000130586	0.00590266	4.35649e-08	5.0214e-08	0.2	0.464103	0.00662508	-0.866025	-0.9801	0.0576689	0.00335967		20.8319	21.2897	7.32549	9.0424	4.69289
ENSG00000163002	NUP35	PC	nucleoporin 35	This gene encodes a member of the nucleoporin family. The encoded protein contains two membrane binding regions, is localized to the nuclear rim, and is part of the nuclear pore complex. All molecules entering or leaving the nucleus either diffuse through or are actively transported by the nuclear pore complex. Alternative splicing results in multiple transcript variants. Pseudogenes of this gene…	hsa03013 (RNA transport), GO:0006355 (regulation of transcription, DNA-templated), GO:0006406 (mRNA export from nucleus), GO:0006409 (tRNA export from nucleus), GO:0006607 (NLS-bearing protein import into nucleus), GO:0006999 (nuclear pore organization), GO:0007077 (mitotic nuclear envelope disassembly), GO:0010827 (regulation of glucose transport), GO:0016032 (viral process), GO:0016925 (protein…		0.593624	0.449033		-0.215162	-0.486499	-0.340997				303.055	60.8345	24.5394	-0.92449	4.90194	36.1222	0.000131329	0.00591378	4.15055e-07	4.39712e-07	0.2	0.464103	0.0244635	-0.866025	-0.979597	0.0576689	0.00348775		43.6095	39.26	24.0368	19.5728	21.862
ENSG00000136830	FAM129B	PC	family with sequence similarity 129 member B		GO:0007411 (axon guidance), GO:0008285 (negative regulation of cell proliferation), GO:0016525 (negative regulation of angiogenesis), GO:0030154 (cell differentiation), GO:0030948 (negative regulation of vascular endothelial growth factor receptor signaling pathway), GO:0032274 (gonadotropin secretion), GO:0034337 (RNA folding), GO:0040019 (positive regulation of embryonic development), GO:004306…		-0.357055	-0.36482		0.319192	0.229211	0.173472				302.363	89.4011	52.6205	0.612157	7.10487	35.9978	0.000133151	0.0059619	8.13144e-07	8.17625e-07	0.2	0.464103	0.00725709	0.866025	0.981731	0.0576689	0.00295602		104.617	104.045	168.372	158.07	152.004
ENSG00000112183	RBM24	PC	RNA binding motif protein 24		GO:0010830 (regulation of myotube differentiation), GO:0030154 (cell differentiation), GO:0043488 (regulation of mRNA stability), GO:0005654 (nucleoplasm), GO:0005829 (cytosol), GO:0003730 (mRNA 3'-UTR binding)		0.390544	0.592953		-0.476824	-0.230868	-0.275804				302.269	67.2611	50.5847	-0.860688	5.29835	35.9809	0.0001334	0.0059619	3.80123e-07	3.97295e-07	0.2	0.464103	0.0657112	-0.866025	-0.968576	0.0576689	0.00665546		49.676	57.4593	26.326	31.5912	30.561
ENSG00000214535	RPS15AP1	p_Pg	ribosomal protein S15a pseudogene 1				0.654921	0.747625		-0.527484	-0.466696	-0.408366				301.504	22.0306	2.10314	-1.55767	2.71087	35.8436	0.000135453	0.00601755	1.3886e-07	1.73613e-07	0.2	0.464103	0.0220329	-0.866025	-0.996321	0.0576689	0.000267752		10.0725	10.8738	3.31936	3.54828	3.7772
ENSG00000164815	ORC5	PC	origin recognition complex subunit 5	The origin recognition complex (ORC) is a highly conserved six subunit protein complex essential for the initiation of the DNA replication in eukaryotic cells. Studies in yeast demonstrated that ORC binds specifically to origins of replication and serves as a platform for the assembly of additional initiation factors such as Cdc6 and Mcm proteins. The protein encoded by this gene is a subunit of …	hsa04110 (Cell cycle), GO:0000082 (G1/S transition of mitotic cell cycle), GO:0006260 (DNA replication), GO:0006270 (DNA replication initiation), GO:0000784 (nuclear chromosome, telomeric region), GO:0000808 (origin recognition complex), GO:0005634 (nucleus), GO:0005654 (nucleoplasm), GO:0005664 (nuclear origin of replication recognition complex), GO:0005829 (cytosol), GO:0000166 (nucleotide bind…		0.471712	0.459626		-0.425316	-0.183423	-0.322599				301.428	67.219	30.1842	-0.811771	5.29583	35.83	0.000135658	0.00601755	5.87135e-07	6.13733e-07	0.2	0.464103	0.00406571	-0.866025	-0.988243	0.0576689	0.00152754		52.8809	52.423	27.4706	32.8502	29.6453
ENSG00000119314	PTBP3	PC	polypyrimidine tract binding protein 3	The protein encoded by this gene binds RNA and is a regulator of cell differentiation. The encoded protein preferentially binds to poly(G) and poly(U) sequences in vitro. Several transcript variants encoding different isoforms have been found for this gene. [provided by RefSeq, Oct 2011].	GO:0006397 (mRNA processing), GO:0008380 (RNA splicing), GO:0009653 (anatomical structure morphogenesis), GO:0033119 (negative regulation of RNA splicing), GO:0043249 (erythrocyte maturation), GO:0045595 (regulation of cell differentiation), GO:0005634 (nucleus), GO:0003723 (RNA binding)		0.663389	0.491916		-0.258081	-0.533279	-0.363945				301.197	51.5562	95.2301	-1.05477	4.37595	35.7887	0.000136285	0.00602287	4.87374e-07	5.27359e-07	0.2	0.464103	0.0390081	-0.866025	-0.979803	0.0576689	0.00343512		31.7056	27.9284	15.7956	12.7051	14.5365
ENSG00000138600	SPPL2A	PC	signal peptide peptidase like 2A	This gene encodes a member of the GXGD family of aspartic proteases, which are transmembrane proteins with two conserved catalytic motifs localized within the membrane-spanning regions, as well as a member of the signal peptide peptidase-like protease (SPPL) family. This protein is expressed in all major adult human tissues and localizes to late endosomal compartments and lysosomal membranes. A p…	GO:0006509 (membrane protein ectodomain proteolysis), GO:0010803 (regulation of tumor necrosis factor-mediated signaling pathway), GO:0031293 (membrane protein intracellular domain proteolysis), GO:0033619 (membrane protein proteolysis), GO:0050776 (regulation of immune response), GO:0005765 (lysosomal membrane), GO:0005770 (late endosome), GO:0005886 (plasma membrane), GO:0016020 (membrane), GO:…		0.53242	0.544544		-0.527776	-0.352664	-0.196524				300.431	59.0343	61.7229	-0.955558	4.79655	35.6514	0.000138389	0.00609323	4.22514e-07	4.49344e-07	0.2	0.464103	0.00539204	-0.866025	-0.985354	0.0576689	0.00212306		38.6877	39.0311	17.5125	20.0306	22.5488
ENSG00000159593	NAE1	PC	NEDD8 activating enzyme E1 subunit 1	The protein encoded by this gene binds to the beta-amyloid precursor protein. Beta-amyloid precursor protein is a cell surface protein with signal-transducing properties, and it is thought to play a role in the pathogenesis of Alzheimer_s disease. In addition, the encoded protein can form a heterodimer with UBE1C and bind and activate NEDD8, a ubiquitin-like protein. This protein is required for …	hsa05010 (Alzheimer disease), GO:0007165 (signal transduction), GO:0033314 (mitotic DNA replication checkpoint), GO:0042981 (regulation of apoptotic process), GO:0043523 (regulation of neuron apoptotic process), GO:0045116 (protein neddylation), GO:0051402 (neuron apoptotic process), GO:0005737 (cytoplasm), GO:0005886 (plasma membrane), GO:0005515 (protein binding), GO:0019781 (NEDD8 activating e…		0.294795	0.473569		-0.212098	-0.31172	-0.244547				300.221	82.5118	15.395	-0.657554	6.38941	35.6138	0.000138973	0.00609637	7.23155e-07	7.4375e-07	0.2	0.464103	0.096747	-0.866025	-0.973169	0.0576689	0.0052544		100.382	113.888	70.05	65.2426	68.4475
ENSG00000177469	CAVIN1	PC	caveolae associated protein 1	This gene encodes a protein that enables the dissociation of paused ternary polymerase I transcription complexes from the 3_ end of pre-rRNA transcripts. This protein regulates rRNA transcription by promoting the dissociation of transcription complexes and the reinitiation of polymerase I on nascent rRNA transcripts. This protein also localizes to caveolae at the plasma membrane and is thought to…	GO:0006355 (regulation of transcription, DNA-templated), GO:0006361 (transcription initiation from RNA polymerase I promoter), GO:0006363 (termination of RNA polymerase I transcription), GO:0005634 (nucleus), GO:0005654 (nucleoplasm), GO:0005737 (cytoplasm), GO:0005739 (mitochondrion), GO:0005783 (endoplasmic reticulum), GO:0005829 (cytosol), GO:0005886 (plasma membrane), GO:0005901 (caveola), GO…		-0.267889	-0.417561		0.244567	0.266924	0.173959				299.9	99.1252	95.0366	0.570824	10.2164	35.5563	0.00013987	0.00611316	1.18682e-06	1.231e-06	0.2	0.464103	0.0259152	0.866025	0.982223	0.0576689	0.0028376		969.025	873.335	1383.14	1404.78	1316.99
ENSG00000197930	ERO1A	PC	endoplasmic reticulum oxidoreductase 1 alpha		hsa04141 (Protein processing in endoplasmic reticulum), hsa05110 (Vibrio cholerae infection), GO:0000302 (response to reactive oxygen species), GO:0006457 (protein folding), GO:0006464 (cellular protein modification process), GO:0009266 (response to temperature stimulus), GO:0010260 (organ senescence), GO:0019471 (4-hydroxyproline metabolic process), GO:0022417 (protein maturation by protein fold…		0.736449	0.364736		-0.384706	-0.246243	-0.470236				299.543	61.7598	47.4804	-0.986467	4.96145	35.4925	0.000140876	0.00613455	3.37067e-07	3.55923e-07	0.2	0.464103	0.157768	-0.866025	-0.938803	0.0576689	0.0180052		49.9049	38.1154	21.862	24.2657	20.4885
ENSG00000133193	FAM104A	PC	family with sequence similarity 104 member A		GO:0005515 (protein binding)		0.880029	0.505574		-0.414356	-0.611017	-0.360231				299.359	35.9354	32.9772	-1.38103	3.49351	35.4597	0.000141395	0.00613469	2.90592e-07	3.32858e-07	0.2	0.464103	0.136511	-0.866025	-0.953754	0.0576689	0.0118551		20.0306	14.9944	6.9821	5.8375	7.32549
ENSG00000140859	KIFC3	PC	kinesin family member C3	KIFC3 belongs to the large superfamily of kinesins, molecular motors that use the energy of ATP hydrolysis to translocate cargoes along microtubules. Members share extensive homology within a globular domain containing the microtubule- and ATP-binding sites and have a coiled-coil stalk domain that mediates oligomerization. Different kinesin family members participate in specific and diverse motil…	GO:0007018 (microtubule-based movement), GO:0007030 (Golgi organization), GO:0007601 (visual perception), GO:0045218 (zonula adherens maintenance), GO:0090136 (epithelial cell-cell adhesion), GO:0005794 (Golgi apparatus), GO:0005813 (centrosome), GO:0005871 (kinesin complex), GO:0005874 (microtubule), GO:0005915 (zonula adherens), GO:0030659 (cytoplasmic vesicle membrane), GO:0070062 (extracellul…		-0.543272	-0.28749		0.359753	0.233033	0.237976				299.088	87.3149	42.6516	0.700801	6.84533	35.4113	0.000142166	0.00614572	4.11303e-07	4.12229e-07	0.2	0.464103	0.0439474	0.866025	0.969275	0.0576689	0.00643518		75.8875	90.9963	143.648	131.401	131.859
ENSG00000090266	NDUFB2	PC	NADH:ubiquinone oxidoreductase subunit B2	The protein encoded by this gene is a subunit of the multisubunit NADH:ubiquinone oxidoreductase (complex I). Mammalian complex I is composed of 45 different subunits. This protein has NADH dehydrogenase activity and oxidoreductase activity. It plays a important role in transfering electrons from NADH to the respiratory chain. The immediate electron acceptor for the enzyme is believed to be ubiqu…	hsa00190 (Oxidative phosphorylation), hsa01100 (Metabolic pathways), hsa04714 (Thermogenesis), hsa04723 (Retrograde endocannabinoid signaling), hsa04932 (Non-alcoholic fatty liver disease (NAFLD)), hsa05010 (Alzheimer disease), hsa05012 (Parkinson disease), hsa05016 (Huntington disease), GO:0006120 (mitochondrial electron transport, NADH to ubiquinone), GO:0032981 (mitochondrial respiratory chain…		-0.325353	-0.477868		0.402627	0.268594	0.132				298.872	93.2201	8.06764	0.678564	7.69246	35.3727	0.000142786	0.00615013	3.94408e-07	4.03229e-07	0.2	0.464103	0.0103236	0.866025	0.945437	0.0576689	0.0151736		160.016	143.763	266.35	242.542	220.451
ENSG00000039123	MTREX	PC	Mtr4 exosome RNA helicase		hsa03018 (RNA degradation), GO:0000398 (mRNA splicing, via spliceosome), GO:0000460 (maturation of 5.8S rRNA), GO:0006364 (rRNA processing), GO:0006401 (RNA catabolic process), GO:0000178 (exosome (RNase complex)), GO:0005634 (nucleus), GO:0005654 (nucleoplasm), GO:0005730 (nucleolus), GO:0071013 (catalytic step 2 spliceosome), GO:0003723 (RNA binding), GO:0004004 (ATP-dependent RNA helicase acti…		0.846258	0.540739		-0.478632	-0.403958	-0.504407				298.28	27.0777	51.5605	-1.47514	3.00221	35.2671	0.000144495	0.00618	2.74031e-07	3.28578e-07	0.2	0.464103	0.117559	-0.866025	-0.97038	0.0576689	0.00609207		14.1931	11.1027	4.46397	4.80735	4.34951
ENSG00000115963	RND3	PC	Rho family GTPase 3	This gene encodes a protein which is a member of the small GTPase protein superfamily. The encoded protein binds only GTP but has no GTPase activity, and appears to act as a negative regulator of cytoskeletal organization leading to loss of adhesion. Multiple alternatively spliced variants, encoding the same protein, have been identified. [provided by RefSeq, Dec 2011].	GO:0007155 (cell adhesion), GO:0007264 (small GTPase mediated signal transduction), GO:0030036 (actin cytoskeleton organization), GO:0000139 (Golgi membrane), GO:0005925 (focal adhesion), GO:0070062 (extracellular vesicular exosome), GO:0003924 (GTPase activity), GO:0005515 (protein binding), GO:0005525 (GTP binding)		0.263798	0.797532		-0.4682	-0.338396	-0.254734				298.272	82.7725	37.5116	-0.927508	6.41673	35.2656	0.000144519	0.00618	9.55919e-08	9.66949e-08	0.2	0.464103	0.233455	-0.866025	-0.888004	0.0576689	0.0442286		96.9482	141.245	57.5737	63.1823	67.074
ENSG00000269972	AC004542.1	lincRNA					0.708567	0.660367		-0.719633	-0.457857	-0.191443				297.802	46.2904	1.10204	-1.2645	4.06472	35.1818	0.000145893	0.00618445	2.03819e-07	2.25081e-07	0.2	0.464103	0.0042582	-0.866025	-0.979936	0.0576689	0.00340135		25.8681	24.9524	8.35563	10.4159	12.9341
ENSG00000074696	HACD3	PC	3-hydroxyacyl-CoA dehydratase 3		hsa00062 (Fatty acid elongation), hsa01040 (Biosynthesis of unsaturated fatty acids), hsa01100 (Metabolic pathways), hsa01212 (Fatty acid metabolism), GO:0007249 (I-kappaB kinase/NF-kappaB signaling), GO:0007257 (activation of JUN kinase activity), GO:0007264 (small GTPase mediated signal transduction), GO:0007266 (Rho protein signal transduction), GO:0016601 (Rac protein signal transduction), GO…		0.422081	0.276155		-0.229179	-0.230704	-0.238354				297.739	88.4674	57.4577	-0.59266	6.99834	35.1706	0.000146078	0.00618445	1.08966e-06	1.10927e-06	0.2	0.464103	0.0957543	-0.866025	-0.981283	0.0576689	0.00306534		168.143	151.775	106.334	106.22	105.647
ENSG00000015171	ZMYND11	PC	zinc finger MYND-type containing 11	The protein encoded by this gene was first identified by its ability to bind the adenovirus E1A protein. The protein localizes to the nucleus. It functions as a transcriptional repressor, and expression of E1A inhibits this repression. Alternatively spliced transcript variants encoding different isoforms have been identified. [provided by RefSeq, Jul 2008].	GO:0000122 (negative regulation of transcription from RNA polymerase II promoter), GO:0006351 (transcription, DNA-templated), GO:0007049 (cell cycle), GO:0008283 (cell proliferation), GO:0016032 (viral process), GO:0016569 (covalent chromatin modification), GO:0034243 (regulation of transcription elongation from RNA polymerase II promoter), GO:0043124 (negative regulation of I-kappaB kinase/NF-ka…		0.626011	0.601293		-0.225798	-0.4272	-0.574305				297.477	46.3913	83.9236	-1.13917	4.07456	35.124	0.00014685	0.00618445	5.03133e-07	5.52657e-07	0.2	0.464103	0.00317752	-0.866025	-0.988068	0.0576689	0.00156185		24.9524	24.4946	12.9341	10.9882	9.72916
ENSG00000127337	YEATS4	PC	YEATS domain containing 4	The protein encoded by this gene is found in the nucleoli. It has high sequence homology to human MLLT1, and yeast and human MLLT3 proteins. Both MLLT1 and MLLT3 proteins belong to a class of transcription factors, indicating that the encoded protein might also represent a transcription factor. This protein is thought to be required for RNA transcription. This gene has been shown to be amplified …	GO:0006351 (transcription, DNA-templated), GO:0007010 (cytoskeleton organization), GO:0007067 (mitotic nuclear division), GO:0040008 (regulation of growth), GO:0043967 (histone H4 acetylation), GO:0043968 (histone H2A acetylation), GO:0045893 (positive regulation of transcription, DNA-templated), GO:0045944 (positive regulation of transcription from RNA polymerase II promoter), GO:0005654 (nucleo…		0.449613	0.922443		-0.208476	-0.497123	-0.666457				297.36	55.0976	19.7779	-1.25039	4.5692	35.103	0.000147199	0.00618445	1.49216e-07	1.60647e-07	0.2	0.464103	0.163984	-0.866025	-0.922339	0.0576689	0.025675		29.8743	42.236	18.1993	14.5365	12.7051
ENSG00000020426	MNAT1	PC	MNAT1, CDK activating kinase assembly factor	The protein encoded by this gene, along with cyclin H and CDK7, forms the CDK-activating kinase (CAK) enzymatic complex. This complex activates several cyclin-associated kinases and can also associate with TFIIH to activate transcription by RNA polymerase II. Two transcript variants encoding different isoforms have been found for this gene. [provided by RefSeq, Sep 2011].	hsa03022 (Basal transcription factors), hsa03420 (Nucleotide excision repair), GO:0000079 (regulation of cyclin-dependent protein serine/threonine kinase activity), GO:0000082 (G1/S transition of mitotic cell cycle), GO:0000086 (G2/M transition of mitotic cell cycle), GO:0006281 (DNA repair), GO:0006283 (transcription-coupled nucleotide-excision repair), GO:0006294 (nucleotide-excision repair, pr…		0.415928	0.541131		-0.14853	-0.474932	-0.333597				297.351	71.0296	18.6002	-0.826554	5.53897	35.1015	0.000147224	0.00618445	4.23154e-07	4.38827e-07	0.2	0.464103	0.0105134	-0.866025	-0.972196	0.0576689	0.00554206		59.863	65.4715	39.8323	31.3622	34.7961
ENSG00000189376	C8orf76	PC	chromosome 8 open reading frame 76				-0.599208	-0.616808		0.387848	0.414084	0.414084				296.848	40.3516	12.0299	1.19665	3.73835	34.3413	0.000160581	0.00645965	1.23578e-06	1.54807e-06	0.138641	0.464103	1.13328e-05	0.888523	0.999612	0.043925	9.1817e-06		7.43995	7.32549	16.7113	17.0546	17.0546
ENSG00000128513	POT1	PC	protection of telomeres 1	This gene is a member of the telombin family and encodes a nuclear protein involved in telomere maintenance. Specifically, this protein functions as a member of a multi-protein complex that binds to the TTAGGG repeats of telomeres, regulating telomere length and protecting chromosome ends from illegitimate recombination, catastrophic chromosome instability, and abnormal chromosome segregation. In…	GO:0007004 (telomere maintenance via telomerase), GO:0016233 (telomere capping), GO:0032202 (telomere assembly), GO:0032210 (regulation of telomere maintenance via telomerase), GO:0032211 (negative regulation of telomere maintenance via telomerase), GO:0032212 (positive regulation of telomere maintenance via telomerase), GO:0032508 (DNA duplex unwinding), GO:0051096 (positive regulation of helica…		0.697938	0.810753		-0.573038	-0.573038	-0.362615				296.84	3.77692	35.0888	-2.30145	1.58442	34.3397	0.00016061	0.00645965	1.69599e-08	2.68458e-08	0.138641	0.464103	0.0132026	-0.888523	-0.993085	0.043925	0.000689629		5.03627	5.60858	0.915686	0.915686	1.37353
ENSG00000101132	PFDN4	PC	prefoldin subunit 4	This gene encodes a member of the prefoldin beta subunit family. The encoded protein is one of six subunits of prefoldin, a molecular chaperone complex that binds and stabilizes newly synthesized polypeptides, thereby allowing them to fold correctly. The complex, consisting of two alpha and four beta subunits, forms a double beta barrel assembly with six protruding coiled-coils. [provided by RefS…	GO:0006457 (protein folding), GO:0005634 (nucleus), GO:0005737 (cytoplasm), GO:0005739 (mitochondrion), GO:0005829 (cytosol), GO:0016272 (prefoldin complex), GO:0005515 (protein binding), GO:0051082 (unfolded protein binding), GO:0051087 (chaperone binding), R-HSA-389957 (Homo sapiens: Prefoldin mediated transfer of substrate to CCT/TriC), R-HSA-389958 (Homo sapiens: Cooperation of Prefoldin and …		0.508946	0.8816		-0.0709402	-0.598477	-0.721128				296.772	74.1841	10.7008	-1.18542	5.76045	34.9985	0.000148954	0.00621514	4.67388e-08	4.71442e-08	0.2	0.464103	0.0933538	-0.866025	-0.926848	0.0576689	0.023488		70.6223	92.0264	46.5855	31.7056	28.9586
ENSG00000135597	REPS1	PC	RALBP1 associated Eps domain containing 1		GO:0006898 (receptor-mediated endocytosis), GO:0061024 (membrane organization), GO:0005829 (cytosol), GO:0005886 (plasma membrane), GO:0005905 (coated pit), GO:0005509 (calcium ion binding), GO:0005515 (protein binding), GO:0017124 (SH3 domain binding), R-HSA-199991 (Homo sapiens: Membrane Trafficking), R-HSA-5653656 (Homo sapiens: Vesicle-mediated transport), R-HSA-8856825 (Homo sapiens: Cargo r…		0.617184	0.319299		-0.333281	-0.264911	-0.338291				296.602	68.5734	65.2814	-0.825417	5.37436	34.9682	0.000149466	0.00621514	6.84927e-07	7.13088e-07	0.2	0.464103	0.150015	-0.866025	-0.952495	0.0576689	0.0123404		61.8088	49.9049	31.0189	32.6213	30.9044
ENSG00000254087	LYN	PC	LYN proto-oncogene, Src family tyrosine kinase	This gene encodes a tyrosine protein kinase, which maybe involved in the regulation of mast cell degranulation, and erythroid differentiation. Alternatively spliced transcript variants encoding different isoforms have been found for this gene. [provided by RefSeq, Jul 2011].	hsa04062 (Chemokine signaling pathway), hsa04064 (NF-kappa B signaling pathway), hsa04611 (Platelet activation), hsa04662 (B cell receptor signaling pathway), hsa04664 (Fc epsilon RI signaling pathway), hsa04666 (Fc gamma R-mediated phagocytosis), hsa04730 (Long-term depression), hsa05120 (Epithelial cell signaling in Helicobacter pylori infection), hsa05167 (Kaposi sarcoma-associated herpesvirus…		0.633549	0.604196		-0.732152	-0.4177	-0.0878943				296.583	72.3419	80.0623	-1.04888	5.6238	34.9649	0.000149523	0.00621514	8.47582e-08	8.61785e-08	0.2	0.464103	0.014045	-0.866025	-0.961593	0.0576689	0.00898333		71.8813	70.3933	26.6693	33.6515	42.8083
ENSG00000108406	DHX40	PC	DEAH-box helicase 40	This gene encodes a member of the DExH/D box family of ATP-dependent RNA helicases that have an essential role in RNA metabolism. Alternate splicing results in multiple transcript variants. A pseudogene of this gene is found on chromosome 17.[provided by RefSeq, Oct 2009].	GO:0000398 (mRNA splicing, via spliceosome), GO:0005681 (spliceosomal complex), GO:0005737 (cytoplasm), GO:0003676 (nucleic acid binding), GO:0004004 (ATP-dependent RNA helicase activity), GO:0005524 (ATP binding)		0.707714	0.324021		-0.361052	-0.361052	-0.309631				296.039	62.5925	44.393	-0.926445	5.01145	34.2	0.00016322	0.00645965	7.12299e-07	7.49162e-07	0.138641	0.464103	0.179738	-0.888523	-0.93555	0.043925	0.0194503		50.935	38.5733	23.2355	23.2355	24.1512
ENSG00000136717	BIN1	PC	bridging integrator 1	This gene encodes several isoforms of a nucleocytoplasmic adaptor protein, one of which was initially identified as a MYC-interacting protein with features of a tumor suppressor. Isoforms that are expressed in the central nervous system may be involved in synaptic vesicle endocytosis and may interact with dynamin, synaptojanin, endophilin, and clathrin. Isoforms that are expressed in muscle and u…	hsa04144 (Endocytosis), hsa04666 (Fc gamma R-mediated phagocytosis), GO:0006897 (endocytosis), GO:0006997 (nucleus organization), GO:0008283 (cell proliferation), GO:0016032 (viral process), GO:0030100 (regulation of endocytosis), GO:0042692 (muscle cell differentiation), GO:0043065 (positive regulation of apoptotic process), GO:0045664 (regulation of neuron differentiation), GO:0048711 (positive…		-0.586011	-0.30189		0.365245	0.279751	0.242905				295.97	79.7022	79.6837	0.756295	6.16156	34.8559	0.000151389	0.00626521	4.83402e-07	5.30437e-07	0.2	0.464103	0.0567485	0.866025	0.972818	0.0576689	0.00535773		45.3264	55.6279	89.5083	84.2431	82.0683
ENSG00000274177	AC004528.2	antisense					0.380417	0.672925		-0.473426	-0.240973	-0.338943				295.842	61.3896	2.8182	-0.939659	4.94009	34.8331	0.000151782	0.00626521	5.48904e-07	5.79537e-07	0.2	0.464103	0.121226	-0.866025	-0.955009	0.0576689	0.0113781		38.2299	47.2723	20.2595	24.1512	22.4343
ENSG00000261061	AC092718.4	sense_intronic					0.676575	0.378189		-0.284311	-0.284311	-0.48614				295.753	60.5905	10.2633	-0.943365	4.88973	34.1503	0.000164161	0.00645965	7.07288e-07	7.47424e-07	0.138641	0.464103	0.124873	-0.888523	-0.953952	0.043925	0.0117796		45.7843	36.8564	22.5488	22.5488	19.3439
ENSG00000117054	ACADM	PC	acyl-CoA dehydrogenase medium chain	This gene encodes the medium-chain specific (C4 to C12 straight chain) acyl-Coenzyme A dehydrogenase. The homotetramer enzyme catalyzes the initial step of the mitochondrial fatty acid beta-oxidation pathway. Defects in this gene cause medium-chain acyl-CoA dehydrogenase deficiency, a disease characterized by hepatic dysfunction, fasting hypoglycemia, and encephalopathy, which can result in infan…	hsa00071 (Fatty acid degradation), hsa00280 (Valine, leucine and isoleucine degradation), hsa00410 (beta-Alanine metabolism), hsa00640 (Propanoate metabolism), hsa01100 (Metabolic pathways), hsa01200 (Carbon metabolism), hsa01212 (Fatty acid metabolism), hsa03320 (PPAR signaling pathway), GO:0006635 (fatty acid beta-oxidation), GO:0019254 (carnitine metabolic process, CoA-linked), GO:0033539 (fat…		0.366578	0.453387		-0.198057	-0.332816	-0.289092				295.379	73.183	36.1571	-0.709168	5.67899	34.751	0.00015321	0.00630228	1.22986e-06	1.28407e-06	0.2	0.464103	0.0149519	-0.866025	-0.98962	0.0576689	0.00126749		64.4414	68.562	42.9228	38.9166	40.1757
ENSG00000130024	PHF10	PC	PHD finger protein 10	This gene contains a predicted ORF that encodes a protein with two zinc finger domains. The function of the encoded protein is not known. Sequence analysis suggests that multiple alternatively spliced transcript variants are derived from this gene but the full-length nature of only two of them is known. These two splice variants encode different isoforms. A pseudogene for this gene is located on …	hsa05225 (Hepatocellular carcinoma), GO:0006351 (transcription, DNA-templated), GO:0006355 (regulation of transcription, DNA-templated), GO:0007399 (nervous system development), GO:0005634 (nucleus), GO:0071564 (npBAF complex), GO:0008270 (zinc ion binding)		0.755013	0.528999		-0.292058	-0.357071	-0.634882				294.218	43.8678	81.4587	-1.21082	3.93686	34.5451	0.000156862	0.00643028	4.69405e-07	5.19578e-07	0.2	0.464103	0.0573934	-0.866025	-0.97222	0.0576689	0.00553482		24.838	20.9463	10.9882	10.4159	8.24117
ENSG00000147140	NONO	PC	non-POU domain containing octamer binding	This gene encodes an RNA-binding protein which plays various roles in the nucleus, including transcriptional regulation and RNA splicing. A rearrangement between this gene and the transcription factor E3 gene has been observed in papillary renal cell carcinoma. Alternatively spliced transcript variants have been described. Pseudogenes exist on Chromosomes 2 and 16. [provided by RefSeq, Feb 2009].	GO:0000398 (mRNA splicing, via spliceosome), GO:0006281 (DNA repair), GO:0006310 (DNA recombination), GO:0006351 (transcription, DNA-templated), GO:0006355 (regulation of transcription, DNA-templated), GO:0006397 (mRNA processing), GO:0007623 (circadian rhythm), GO:0008380 (RNA splicing), GO:0042752 (regulation of circadian rhythm), GO:0045892 (negative regulation of transcription, DNA-templated)…		0.419552	0.256701		-0.247396	-0.150346	-0.278511				293.6	97.9139	46.3952	-0.566743	9.15445	34.4357	0.000158845	0.00645965	1.20571e-06	1.19896e-06	0.2	0.464103	0.084177	-0.866025	-0.968378	0.0576689	0.00671821		747.543	667.535	470.09	502.94	460.018
ENSG00000165525	NEMF	PC	nuclear export mediator factor		GO:0051168 (nuclear export), GO:0005634 (nucleus)		0.656256	0.359086		-0.315749	-0.463548	-0.236045				293.362	64.5777	61.765	-0.899256	5.12937	34.3936	0.000159617	0.00645965	6.08729e-07	6.38315e-07	0.2	0.464103	0.127183	-0.866025	-0.951481	0.0576689	0.0127357		53.3387	43.0372	26.2115	23.4644	27.814
ENSG00000063046	EIF4B	PC	eukaryotic translation initiation factor 4B		hsa03013 (RNA transport), hsa04150 (mTOR signaling pathway), hsa04151 (PI3K-Akt signaling pathway), hsa05205 (Proteoglycans in cancer), GO:0000289 (nuclear-transcribed mRNA poly(A) tail shortening), GO:0001731 (formation of translation preinitiation complex), GO:0002181 (cytoplasmic translation), GO:0006413 (translational initiation), GO:0006446 (regulation of translational initiation), GO:009701…		0.345029	0.416545		-0.246897	-0.163408	-0.351269				292.66	81.7127	40.8009	-0.64861	6.32207	34.2695	0.000161916	0.00645965	1.13479e-06	1.16858e-06	0.2	0.464103	0.00345521	-0.866025	-0.984708	0.0576689	0.00226482		99.3519	104.503	65.2426	69.2487	60.5497
ENSG00000139921	TMX1	PC	thioredoxin related transmembrane protein 1	TXNDC1 is a thioredoxin (TXN; see MIM 187700)-related protein with disulfide reductase activity (Matsuo et al., 2001 [PubMed 11152479]).[supplied by OMIM, Mar 2008]. Sequence Note: This RefSeq record was created from transcript and genomic sequence data to make the sequence consistent with the reference genome assembly. The genomic coordinates used for the transcript record were based on transcri…	GO:0006457 (protein folding), GO:0034976 (response to endoplasmic reticulum stress), GO:0045454 (cell redox homeostasis), GO:0055114 (oxidation-reduction process), GO:0005789 (endoplasmic reticulum membrane), GO:0016021 (integral component of membrane), GO:0003756 (protein disulfide isomerase activity), GO:0015036 (disulfide oxidoreductase activity)		-1.1661	-0.955217		1.29845	0.729486	0.0933792				292.648	38.1057	80.9708	2.34065	3.61709	34.2674	0.000161955	0.00645965	3.19541e-08	4.77788e-08	0.2	0.464103	0.0895702	0.866025	0.809871	0.0576689	0.0966305		3.09044	3.89166	26.097	16.9402	10.187
ENSG00000116815	CD58	PC	CD58 molecule	This gene encodes a member of the immunoglobulin superfamily. The encoded protein is a ligand of the T lymphocyte CD2 protein, and functions in adhesion and activation of T lymphocytes. The protein is localized to the plasma membrane. Alternatively spliced transcript variants have been described. [provided by RefSeq, Jan 2009].	hsa04514 (Cell adhesion molecules (CAMs)), hsa05169 (Epstein-Barr virus infection), GO:0007155 (cell adhesion), GO:0016337 (single organismal cell-cell adhesion), GO:0034113 (heterotypic cell-cell adhesion), GO:0043312 (neutrophil degranulation), GO:0050900 (leukocyte migration), GO:0071346 (cellular response to interferon-gamma), GO:0071356 (cellular response to tumor necrosis factor), GO:200048…		0.436846	1.20539		-0.608269	-0.244274	-0.789697				292.466	53.1292	18.8694	-1.53849	4.45638	34.2353	0.000162556	0.00645965	8.12738e-08	8.90321e-08	0.2	0.464103	0.245002	-0.866025	-0.87156	0.0576689	0.0541795		25.9826	45.6698	11.5605	15.4522	9.95808
ENSG00000141552	ANAPC11	PC	anaphase promoting complex subunit 11		hsa04110 (Cell cycle), hsa04114 (Oocyte meiosis), hsa04120 (Ubiquitin mediated proteolysis), hsa04914 (Progesterone-mediated oocyte maturation), hsa05166 (Human T-cell leukemia virus 1 infection), GO:0007067 (mitotic nuclear division), GO:0016567 (protein ubiquitination), GO:0031145 (anaphase-promoting complex-dependent proteasomal ubiquitin-dependent protein catabolic process), GO:0042787 (prote…		-0.425654	-0.295628		0.276904	0.287769	0.156608				292.189	90.36	10.3727	0.609281	7.24209	34.1863	0.000163479	0.00645965	1.21831e-06	1.23255e-06	0.2	0.464103	0.00618343	0.866025	0.976749	0.0576689	0.00424119		109.653	120.184	179.703	181.077	165.167
ENSG00000136261	BZW2	PC	basic leucine zipper and W2 domains 2		GO:0007399 (nervous system development), GO:0030154 (cell differentiation), GO:0005737 (cytoplasm), GO:0016020 (membrane), GO:0045296 (cadherin binding)		0.523569	0.308531		-0.364989	-0.209666	-0.257444				291.678	76.6655	47.186	-0.718463	5.932	34.0962	0.000165194	0.00645965	9.83102e-07	1.01677e-06	0.2	0.464103	0.103969	-0.866025	-0.964087	0.0576689	0.00812581		85.6166	73.4838	45.3264	50.7061	48.9892
ENSG00000198464	ZNF480	PC	zinc finger protein 480		GO:0006351 (transcription, DNA-templated), GO:0006355 (regulation of transcription, DNA-templated), GO:0005654 (nucleoplasm), GO:0005829 (cytosol), GO:0003676 (nucleic acid binding), GO:0046872 (metal ion binding), R-HSA-212436 (Homo sapiens: Generic Transcription Pathway), R-HSA-74160 (Homo sapiens: Gene Expression)		0.794647	0.653747		-0.324611	-0.544705	-0.579078				291.6	19.9192	82.3336	-1.64996	2.5789	34.0824	0.000165457	0.00645965	1.50625e-07	1.91401e-07	0.2	0.464103	0.0215351	-0.866025	-0.989275	0.0576689	0.0013311		10.3015	9.15686	3.66274	2.86152	2.74706
ENSG00000119335	SET	PC	SET nuclear proto-oncogene	The protein encoded by this gene inhibits acetylation of nucleosomes, especially histone H4, by histone acetylases (HAT). This inhibition is most likely accomplished by masking histone lysines from being acetylated, and the consequence is to silence HAT-dependent transcription. The encoded protein is part of a complex localized to the endoplasmic reticulum but is found in the nucleus and inhibits…	GO:0006260 (DNA replication), GO:0006334 (nucleosome assembly), GO:0006337 (nucleosome disassembly), GO:0006913 (nucleocytoplasmic transport), GO:0016032 (viral process), GO:0035067 (negative regulation of histone acetylation), GO:0043086 (negative regulation of catalytic activity), GO:0043488 (regulation of mRNA stability), GO:0043524 (negative regulation of neuron apoptotic process), GO:0045892…		0.249163	0.573216		-0.400219	-0.204368	-0.217792				291.259	94.4902	27.5595	-0.697155	7.95494	34.0223	0.000166616	0.00645965	3.99169e-07	3.99516e-07	0.2	0.464103	0.165891	-0.866025	-0.925324	0.0576689	0.0242203		285.694	358.148	181.42	208.09	206.144
ENSG00000125944	HNRNPR	PC	heterogeneous nuclear ribonucleoprotein R	This gene encodes an RNA-binding protein that is a member of the spliceosome C complex, which functions in pre-mRNA processing and transport. The encoded protein also promotes transcription at the c-fos gene. Alternative splicing results in multiple transcript variants. There are pseudogenes for this gene on chromosomes 4, 11, and 10. [provided by RefSeq, Jul 2014].	GO:0000398 (mRNA splicing, via spliceosome), GO:0006397 (mRNA processing), GO:0007623 (circadian rhythm), GO:0010467 (gene expression), GO:0043086 (negative regulation of catalytic activity), GO:0061014 (positive regulation of mRNA catabolic process), GO:0061157 (mRNA destabilization), GO:0005654 (nucleoplasm), GO:0005681 (spliceosomal complex), GO:0005783 (endoplasmic reticulum), GO:0030425 (den…		0.223154	0.634965		-0.278838	-0.247998	-0.331282				291.084	90.3684	73.4668	-0.738833	7.2423	33.9914	0.000167215	0.00645965	3.49356e-07	3.51878e-07	0.2	0.464103	0.216907	-0.866025	-0.906859	0.0576689	0.033642		170.546	227.548	119.84	122.473	115.491
ENSG00000135842	FAM129A	PC	family with sequence similarity 129 member A		GO:0001933 (negative regulation of protein phosphorylation), GO:0001934 (positive regulation of protein phosphorylation), GO:0034976 (response to endoplasmic reticulum stress), GO:0045727 (positive regulation of translation), GO:0005737 (cytoplasm), GO:0005829 (cytosol), GO:0005886 (plasma membrane), GO:0016020 (membrane), GO:0070062 (extracellular vesicular exosome), GO:0003674 (molecular_functi…		0.393752	0.681963		-0.474795	-0.30828	-0.292639				291.051	57.0239	81.9467	-0.97214	4.6777	33.9857	0.000167326	0.00645965	9.04903e-07	9.63248e-07	0.2	0.464103	0.121561	-0.866025	-0.959177	0.0576689	0.0098403		32.1635	39.7179	16.7113	19.0005	19.2294
ENSG00000174886	NDUFA11	PC	NADH:ubiquinone oxidoreductase subunit A11	This gene encodes a subunit of the membrane-bound mitochondrial complex I. Complex I is composed of numerous subunits and functions as the NADH-ubiquinol reductase of the mitochondrial electron transport chain. Mutations in this gene are associated with severe mitochondrial complex I deficiency. Alternate splicing results in multiple transcript variants.[provided by RefSeq, Oct 2010].	hsa00190 (Oxidative phosphorylation), hsa01100 (Metabolic pathways), hsa04714 (Thermogenesis), hsa04723 (Retrograde endocannabinoid signaling), hsa04932 (Non-alcoholic fatty liver disease (NAFLD)), hsa05010 (Alzheimer disease), hsa05012 (Parkinson disease), hsa05016 (Huntington disease), GO:0006120 (mitochondrial electron transport, NADH to ubiquinone), GO:0032981 (mitochondrial respiratory chain…		-0.745552	-0.294323		0.420191	0.35618	0.263504				290.805	79.3742	31.5807	0.877479	6.13737	33.9424	0.000168169	0.00645965	2.38469e-07	2.64743e-07	0.2	0.464103	0.0896788	0.866025	0.959155	0.0576689	0.00984825		39.1456	54.2544	90.3095	86.3034	80.8093
ENSG00000256100	AP000721.1	PC					-0.613191	-1.25652		0.458424	0.738151	0.673138				290.718	23.9401	5.25784	2.19862	2.83177	33.9271	0.00016847	0.00645965	1.42874e-08	2.29823e-08	0.2	0.464103	0.0178378	0.866025	0.970867	0.0576689	0.00594305		3.09044	1.25907	8.69902	10.9882	10.4159
ENSG00000146094	DOK3	PC	docking protein 3		GO:0007265 (Ras protein signal transduction), GO:0043312 (neutrophil degranulation), GO:0005886 (plasma membrane), GO:0030667 (secretory granule membrane), GO:0101003 (NA), GO:0005158 (insulin receptor binding), GO:0005515 (protein binding), R-HSA-168249 (Homo sapiens: Innate Immune System), R-HSA-168256 (Homo sapiens: Immune System), R-HSA-6798695 (Homo sapiens: Neutrophil degranulation)		0.474199	0.712681		-0.550996	-0.432476	-0.203409				290.708	52.1282	33.4231	-1.08155	4.40274	33.9253	0.000168506	0.00645965	6.51131e-07	7.01894e-07	0.2	0.464103	0.0650564	-0.866025	-0.965394	0.0576689	0.00768764		27.9284	33.3081	12.7051	13.9642	16.7113
ENSG00000119707	RBM25	PC	RNA binding motif protein 25		hsa03040 (Spliceosome), GO:0000381 (regulation of alternative mRNA splicing, via spliceosome), GO:0006397 (mRNA processing), GO:0008380 (RNA splicing), GO:0042981 (regulation of apoptotic process), GO:0005681 (spliceosomal complex), GO:0005737 (cytoplasm), GO:0016607 (nuclear speck), GO:0003723 (RNA binding), GO:0003729 (mRNA binding), GO:0005515 (protein binding)		0.302352	0.655683		-0.407249	-0.29531	-0.255475				290.703	70.323	85.5556	-0.843166	5.50228	33.9244	0.000168523	0.00645965	6.51361e-07	6.75134e-07	0.2	0.464103	0.169883	-0.866025	-0.935264	0.0576689	0.0195789		53.6821	69.1343	32.049	34.7961	35.8262
ENSG00000151092	NGLY1	PC	N-glycanase 1	This gene encodes an enzyme that catalyzes hydrolysis of an N(4)-(acetyl-beta-D-glucosaminyl) asparagine residue to N-acetyl-beta-D-glucosaminylamine and a peptide containing an aspartate residue. The encoded enzyme may play a role in the proteasome-mediated degradation of misfolded glycoproteins. Multiple transcript variants encoding different isoforms have been found for this gene.[provided by …	hsa04141 (Protein processing in endoplasmic reticulum), GO:0006457 (protein folding), GO:0006515 (misfolded or incompletely synthesized protein catabolic process), GO:0006516 (glycoprotein catabolic process), GO:0006517 (protein deglycosylation), GO:0005634 (nucleus), GO:0005737 (cytoplasm), GO:0005829 (cytosol), GO:0000224 (peptide-N4-(N-acetyl-beta-glucosaminyl)asparagine amidase activity), GO:…		0.609714	0.249538		-0.293266	-0.306454	-0.259531				290.597	81.3257	61.4958	-0.745528	6.28528	33.9058	0.000168888	0.00645965	6.02714e-07	6.16433e-07	0.2	0.464103	0.192819	-0.866025	-0.926446	0.0576689	0.0236807		115.605	89.6228	60.8931	60.3208	62.3811
ENSG00000075188	NUP37	PC	nucleoporin 37	Bidirectional transport of macromolecules between the cytoplasm and nucleus occurs through nuclear pore complexes (NPCs) embedded in the nuclear envelope. NPCs are composed of subcomplexes, and NUP37 is part of one such subcomplex, Nup107-160 (Loiodice et al., 2004 [PubMed 15146057]).[supplied by OMIM, Mar 2008].	hsa03013 (RNA transport), GO:0006406 (mRNA export from nucleus), GO:0006409 (tRNA export from nucleus), GO:0007062 (sister chromatid cohesion), GO:0007067 (mitotic nuclear division), GO:0007077 (mitotic nuclear envelope disassembly), GO:0010827 (regulation of glucose transport), GO:0016032 (viral process), GO:0016925 (protein sumoylation), GO:0019083 (viral transcription), GO:0031047 (gene silenc…		0.526838	0.339161		-0.28372	-0.303451	-0.278829				290.568	68.0686	21.4688	-0.760031	5.34297	33.9006	0.00016899	0.00645965	1.63714e-06	1.70521e-06	0.2	0.464103	0.103115	-0.866025	-0.978038	0.0576689	0.00389396		57.1159	49.9049	31.7056	31.2478	31.8201
ENSG00000171566	PLRG1	PC	pleiotropic regulator 1	This gene encodes a core component of the cell division cycle 5-like (CDC5L) complex. The CDC5L complex is part of the spliceosome and is required for pre-mRNA splicing. The encoded protein plays a critical role in alternative splice site selection. Alternatively spliced transcript variants encoding multiple isoforms have been observed for this gene. [provided by RefSeq, Jan 2011].	hsa03040 (Spliceosome), GO:0000398 (mRNA splicing, via spliceosome), GO:0034504 (protein localization to nucleus), GO:1900087 (positive regulation of G1/S transition of mitotic cell cycle), GO:0000974 (Prp19 complex), GO:0001650 (fibrillar center), GO:0005654 (nucleoplasm), GO:0005662 (DNA replication factor A complex), GO:0016607 (nuclear speck), GO:0031965 (nuclear membrane), GO:0071011 (precat…		0.397443	0.521498		-0.462348	-0.345842	-0.110751				288.904	76.4889	20.7285	-0.784466	5.9195	33.6083	0.000174861	0.00665073	5.70602e-07	5.87117e-07	0.2	0.464103	0.00957495	-0.866025	-0.965066	0.0576689	0.00779681		77.0321	84.1286	41.5492	45.212	53.5676
ENSG00000155755	TMEM237	PC	transmembrane protein 237	The protein encoded by this gene is a tetraspanin protein that is thought to be involved in WNT signaling. Defects in this gene are a cause of Joubert syndrome-14. Two transcript variants encoding different isoforms have been found for this gene. [provided by RefSeq, Jan 2012].	GO:0030111 (regulation of Wnt signaling pathway), GO:0060271 (cilium morphogenesis), GO:0016020 (membrane), GO:0016021 (integral component of membrane), GO:0035869 (ciliary transition zone)		0.391324	0.473539		-0.365981	-0.192923	-0.305959				288.836	68.4388	71.288	-0.754056	5.36558	33.5962	0.000175108	0.00665073	1.66946e-06	1.73802e-06	0.2	0.464103	0.00659725	-0.866025	-0.988306	0.0576689	0.00151527		52.6519	55.8568	30.3321	34.4527	31.7056
ENSG00000198830	HMGN2	PC	high mobility group nucleosomal binding domain 2	The protein encoded by this gene binds nucleosomal DNA and is associated with transcriptionally active chromatin. Along with a similar protein, HMGN1, the encoded protein may help maintain an open chromatin configuration around transcribable genes. The protein has also been found to have antimicrobial activity against bacteria, viruses and fungi. [provided by RefSeq, Oct 2014]. Publication Note: …	GO:0000785 (chromatin), GO:0005634 (nucleus), GO:0005737 (cytoplasm), GO:0003723 (RNA binding), GO:0005515 (protein binding), GO:0031492 (nucleosomal DNA binding)		-0.377781	-0.292783		0.146639	0.206065	0.317861				288.192	98.4775	20.8127	0.561519	9.54517	33.4833	0.000177445	0.00671666	1.96885e-06	2.03672e-06	0.2	0.464103	0.00466683	0.866025	0.968602	0.0576689	0.00664692		563.834	598.172	811.87	846.094	914.427
ENSG00000076248	UNG	PC	uracil DNA glycosylase	This gene encodes one of several uracil-DNA glycosylases. One important function of uracil-DNA glycosylases is to prevent mutagenesis by eliminating uracil from DNA molecules by cleaving the N-glycosylic bond and initiating the base-excision repair (BER) pathway. Uracil bases occur from cytosine deamination or misincorporation of dUMP residues. Alternative promoter usage and splicing of this gene…	hsa03410 (Base excision repair), hsa05340 (Primary immunodeficiency), GO:0006281 (DNA repair), GO:0006284 (base-excision repair), GO:0016032 (viral process), GO:0016446 (somatic hypermutation of immunoglobulin genes), GO:0016447 (somatic recombination of immunoglobulin gene segments), GO:0043066 (negative regulation of apoptotic process), GO:0045008 (depyrimidination), GO:0045830 (positive regula…		0.386031	0.319527		-0.265853	-0.265853	-0.173853				288.095	82.4613	65.9039	-0.601503	6.38507	32.8253	0.000191835	0.00699549	2.63193e-06	2.71014e-06	0.138641	0.464103	0.00979534	-0.888523	-0.991593	0.043925	0.000924092		107.25	102.328	67.5318	67.5318	72.1103
ENSG00000264859	DSG2-AS1	antisense	DSG2 antisense RNA 1				0.520621	1.18253		-0.813424	-0.534267	-0.355462				287.958	23.183	48.776	-1.92991	2.78462	33.4424	0.000178302	0.00671666	1.20189e-07	1.50312e-07	0.2	0.464103	0.211605	-0.866025	-0.903333	0.0576689	0.0355512		8.81348	15.1088	2.28921	3.2049	3.89166
ENSG00000183856	IQGAP3	PC	IQ motif containing GTPase activating protein 3		hsa04810 (Regulation of actin cytoskeleton), GO:0000082 (G1/S transition of mitotic cell cycle), GO:0000187 (activation of MAPK activity), GO:0007265 (Ras protein signal transduction), GO:0008361 (regulation of cell size), GO:0010628 (positive regulation of gene expression), GO:0010629 (negative regulation of gene expression), GO:0033601 (positive regulation of mammary gland epithelial cell proli…		0.420924	0.407838		-0.462176	-0.132806	-0.23378				287.843	84.7073	91.0827	-0.698232	6.58235	33.4222	0.000178725	0.00671666	6.92391e-07	7.06042e-07	0.2	0.464103	0.0109064	-0.866025	-0.971553	0.0576689	0.00573484		124.762	123.618	66.7306	84.3576	78.5201
ENSG00000170242	USP47	PC	ubiquitin specific peptidase 47		GO:0006284 (base-excision repair), GO:0006511 (ubiquitin-dependent protein catabolic process), GO:0006974 (cellular response to DNA damage stimulus), GO:0010972 (negative regulation of G2/M transition of mitotic cell cycle), GO:0016579 (protein deubiquitination), GO:0030307 (positive regulation of cell growth), GO:0034644 (cellular response to UV), GO:0035520 (monoubiquitinated protein deubiquiti…		0.4553	0.353161		-0.393701	-0.279002	-0.135758				287.741	80.6359	87.4232	-0.6884	6.22651	33.4043	0.000179103	0.00671666	1.04604e-06	1.07575e-06	0.2	0.464103	0.0081843	-0.866025	-0.974248	0.0576689	0.00494154		100.153	93.171	54.7122	59.4051	65.8149
ENSG00000283041	AC008038.1	p_Pg					-0.770726	-0.662757		0.236637	0.614698	0.582148				287.56	30.5939	42.8788	1.55016	3.19124	33.3727	0.00017977	0.00672047	5.45632e-07	7.43561e-07	0.2	0.464103	0.0164824	0.866025	0.952701	0.0576689	0.0122606		3.89166	4.34951	9.84362	13.3919	13.0485
ENSG00000038210	PI4K2B	PC	phosphatidylinositol 4-kinase type 2 beta	Phosphatidylinositol 4-kinases (PI4Ks) phosphorylate phosphatidylinositol to generate phosphatidylinositol 4-phosphate (PIP), an immediate precursor of several important signaling and scaffolding molecules. PIP itself may also have direct functional and structural roles. PI4K2B is a primarily cytosolic PI4K that is recruited to membranes, where it stimulates phosphatidylinositol 4,5-bisphosphate …	hsa00562 (Inositol phosphate metabolism), hsa01100 (Metabolic pathways), hsa04070 (Phosphatidylinositol signaling system), GO:0006661 (phosphatidylinositol biosynthetic process), GO:0007030 (Golgi organization), GO:0007032 (endosome organization), GO:0046854 (phosphatidylinositol phosphorylation), GO:0005768 (endosome), GO:0005802 (trans-Golgi network), GO:0005829 (cytosol), GO:0005886 (plasma me…		-0.680013	-0.342143		0.355808	0.355808	0.31054				286.705	64.1908	93.5812	0.897161	5.10654	32.5867	0.000197397	0.00710601	1.09992e-06	1.25428e-06	0.138641	0.464103	0.0861827	0.888523	0.981141	0.043925	0.00310007		19.6872	25.4103	42.4649	42.4649	41.0914
ENSG00000147687	TATDN1	PC	TatD DNase domain containing 1		GO:0006308 (DNA catabolic process), GO:0090305 (nucleic acid phosphodiester bond hydrolysis), GO:0005654 (nucleoplasm), GO:0004536 (deoxyribonuclease activity), GO:0005515 (protein binding), GO:0016888 (endodeoxyribonuclease activity, producing 5'-phosphomonoesters), GO:0046872 (metal ion binding)		0.771715	0.421371		-0.122624	-0.552409	-0.518053				286.559	64.8721	13.9648	-1.04781	5.14812	33.1976	0.000183529	0.00682098	3.12428e-07	3.27718e-07	0.2	0.464103	0.111403	-0.866025	-0.932791	0.0576689	0.0207036		57.4593	44.6397	29.9887	21.7475	22.3198
ENSG00000120438	TCP1	PC	t-complex 1	The protein encoded by this gene is a molecular chaperone that is a member of the chaperonin containing TCP1 complex (CCT), also known as the TCP1 ring complex (TRiC). This complex consists of two identical stacked rings, each containing eight different proteins. Unfolded polypeptides enter the central cavity of the complex and are folded in an ATP-dependent manner. The complex folds various prot…	GO:0006457 (protein folding), GO:0006458 ('de novo' protein folding), GO:0007021 (tubulin complex assembly), GO:0007339 (binding of sperm to zona pellucida), GO:0032212 (positive regulation of telomere maintenance via telomerase), GO:0044053 (translocation of peptides or proteins into host cell cytoplasm), GO:0050821 (protein stabilization), GO:0051973 (positive regulation of telomerase activity)…		0.674166	0.220477		-0.366043	-0.305055	-0.223544				286.432	91.4031	21.208	-0.771218	7.36898	33.1755	0.00018401	0.00682098	3.43136e-07	3.44756e-07	0.2	0.464103	0.22778	-0.866025	-0.894709	0.0576689	0.0403592		254.217	185.083	122.587	127.967	135.522
ENSG00000167601	AXL	PC	AXL receptor tyrosine kinase	The protein encoded by this gene is a member of the Tyro3-Axl-Mer (TAM) receptor tyrosine kinase subfamily. The encoded protein possesses an extracellular domain which is composed of two immunoglobulin-like motifs at the N-terminal, followed by two fibronectin type-III motifs. It transduces signals from the extracellular matrix into the cytoplasm by binding to the vitamin K-dependent protein grow…	hsa01521 (EGFR tyrosine kinase inhibitor resistance), GO:0001764 (neuron migration), GO:0001779 (natural killer cell differentiation), GO:0001961 (positive regulation of cytokine-mediated signaling pathway), GO:0001974 (blood vessel remodeling), GO:0006909 (phagocytosis), GO:0006954 (inflammatory response), GO:0007165 (signal transduction), GO:0007283 (spermatogenesis), GO:0018108 (peptidyl-tyros…		0.245088	0.398697		-0.160826	-0.230879	-0.252079				286.388	98.326	84.1928	-0.539544	9.41475	33.1676	0.00018418	0.00682098	2.31273e-06	2.29699e-06	0.2	0.464103	0.0915585	-0.866025	-0.972327	0.0576689	0.00550304		794.701	884.209	599.316	570.816	562.46
ENSG00000129055	ANAPC13	PC	anaphase promoting complex subunit 13	This gene encodes a component of the anaphase promoting complex, a large ubiquitin-protein ligase that controls cell cycle progression by regulating the degradation of cell cycle regulators such as B-type cyclins. The encoded protein is evolutionarily conserved and is required for the integrity and ubiquitin ligase activity of the anaphase promoting complex. Pseudogenes and splice variants have b…	hsa04110 (Cell cycle), hsa04114 (Oocyte meiosis), hsa04120 (Ubiquitin mediated proteolysis), hsa04914 (Progesterone-mediated oocyte maturation), GO:0007067 (mitotic nuclear division), GO:0051301 (cell division), GO:0070979 (protein K11-linked ubiquitination), GO:0005680 (anaphase-promoting complex), GO:0005515 (protein binding), R-HSA-1280218 (Homo sapiens: Adaptive Immune System), R-HSA-168256 (…		0.310609	0.554607		-0.152121	-0.40584	-0.307255				285.712	79.0461	30.1253	-0.74298	6.11276	33.0496	0.000186778	0.00689569	8.46353e-07	8.68784e-07	0.2	0.464103	0.100838	-0.866025	-0.950014	0.0576689	0.0133143		83.0985	98.7796	59.7485	49.7904	53.4532
ENSG00000213058	AL365357.1	p_Pg					-0.299532	-0.711362		0.392386	0.318192	0.300316				284.994	73.6541	1.73299	0.863485	5.71841	32.9244	0.00018958	0.00696635	5.39093e-07	6.02701e-07	0.2	0.464103	0.0988994	0.866025	0.968618	0.0576689	0.00664213		40.4046	29.8743	66.5017	63.0679	62.2666
ENSG00000134153	EMC7	PC	ER membrane protein complex subunit 7		GO:0008150 (biological_process), GO:0016021 (integral component of membrane), GO:0072546 (ER membrane protein complex), GO:0030246 (carbohydrate binding)		0.548236	0.233269		-0.316815	-0.172263	-0.292427				284.786	92.4966	10.1539	-0.665337	7.551	32.8882	0.000190401	0.00696635	8.00108e-07	8.04143e-07	0.2	0.464103	0.173791	-0.866025	-0.927895	0.0576689	0.0229893		267.037	214.27	145.709	161.275	148.227
ENSG00000138069	RAB1A	PC	RAB1A, member RAS oncogene family	This gene encodes a member of the Ras superfamily of GTPases. Members of the gene family cycle between inactive GDP-bound and active GTP-bound forms. This small GTPase controls vesicle traffic from the endoplasmic reticulum to the Golgi apparatus. Multiple alternatively spliced transcript variants have been identified for this gene which encode different protein isoforms. [provided by RefSeq, Oct…	hsa05134 (Legionellosis), GO:0000045 (autophagic vacuole assembly), GO:0006888 (ER to Golgi vesicle-mediated transport), GO:0006890 (retrograde vesicle-mediated transport, Golgi to ER), GO:0006897 (endocytosis), GO:0006914 (autophagy), GO:0007030 (Golgi organization), GO:0016192 (vesicle-mediated transport), GO:0016477 (cell migration), GO:0019068 (virion assembly), GO:0030252 (growth hormone sec…		0.269881	0.532069		-0.299279	-0.254283	-0.248388				284.773	78.4236	58.4336	-0.693937	6.06275	32.886	0.00019045	0.00696635	1.5325e-06	1.58008e-06	0.2	0.464103	0.149818	-0.866025	-0.953479	0.0576689	0.0119608		78.4056	94.4301	52.1941	53.911	54.1399
ENSG00000069509	FUNDC1	PC	FUN14 domain containing 1	This gene encodes a protein with a FUN14 superfamily domain. The function of the encoded protein is not known. [provided by RefSeq, Sep 2011].	hsa04137 (Mitophagy - animal), GO:0000422 (mitochondrion degradation), GO:0001666 (response to hypoxia), GO:0010243 (response to organonitrogen compound), GO:0005741 (mitochondrial outer membrane), GO:0031307 (integral component of mitochondrial outer membrane), GO:0005515 (protein binding)		0.690569	0.319419		-0.458492	-0.225012	-0.326483				284.117	67.3873	31.9256	-0.893338	5.30505	32.7717	0.000193067	0.0070189	8.09249e-07	8.42582e-07	0.2	0.464103	0.166192	-0.866025	-0.930758	0.0576689	0.0216433		61.5799	47.1578	26.6693	31.7056	29.4164
ENSG00000149231	CCDC82	PC	coiled-coil domain containing 82				0.264032	0.740243		-0.339633	-0.339633	-0.325009				283.964	69.4061	48.2123	-0.896174	5.42675	32.1179	0.000208899	0.00726139	8.93188e-07	9.25944e-07	0.138641	0.464103	0.222955	-0.888523	-0.904413	0.043925	0.0349625		49.2181	69.2487	31.7056	31.7056	32.049
ENSG00000171867	PRNP	PC	prion protein	The protein encoded by this gene is a membrane glycosylphosphatidylinositol-anchored glycoprotein that tends to aggregate into rod-like structures. The encoded protein contains a highly unstable region of five tandem octapeptide repeats. This gene is found on chromosome 20, approximately 20 kbp upstream of a gene which encodes a biochemically and structurally similar protein to the one encoded by…	hsa04216 (Ferroptosis), hsa05020 (Prion diseases), GO:0001933 (negative regulation of protein phosphorylation), GO:0006878 (cellular copper ion homeostasis), GO:0006979 (response to oxidative stress), GO:0007050 (cell cycle arrest), GO:0007165 (signal transduction), GO:0007616 (long-term memory), GO:0008152 (metabolic process), GO:0010955 (negative regulation of protein processing), GO:0031648 (p…		0.361788	0.6827		-0.124482	-0.354821	-0.565185				283.82	77.6834	63.0857	-0.895065	6.00272	32.7202	0.000194262	0.00703915	3.33266e-07	3.39531e-07	0.2	0.464103	0.109346	-0.866025	-0.929592	0.0576689	0.0221884		78.4056	98.4362	55.399	46.9289	40.2902
ENSG00000167460	TPM4	PC	tropomyosin 4	This gene encodes a member of the tropomyosin family of actin-binding proteins involved in the contractile system of striated and smooth muscles and the cytoskeleton of non-muscle cells. Tropomyosins are dimers of coiled-coil proteins that polymerize end-to-end along the major groove in most actin filaments. They provide stability to the filaments and regulate access of other actin-binding protei…	hsa04260 (Cardiac muscle contraction), hsa04261 (Adrenergic signaling in cardiomyocytes), hsa05410 (Hypertrophic cardiomyopathy (HCM)), hsa05414 (Dilated cardiomyopathy (DCM)), GO:0001649 (osteoblast differentiation), GO:0006928 (cellular component movement), GO:0006936 (muscle contraction), GO:0007015 (actin filament organization), GO:0030049 (muscle filament sliding), GO:0001725 (stress fiber),…		0.400734	0.268061		-0.324929	-0.20967	-0.134196				283.686	98.9065	18.4403	-0.557824	9.96357	32.6967	0.000194808	0.00703915	2.21285e-06	2.19319e-06	0.2	0.464103	0.0401418	-0.866025	-0.968024	0.0576689	0.00683097		1292.95	1179.17	781.08	846.208	891.764
ENSG00000197044	ZNF441	PC	zinc finger protein 441		GO:0006351 (transcription, DNA-templated), GO:0006355 (regulation of transcription, DNA-templated), GO:0005634 (nucleus), GO:0003677 (DNA binding), GO:0046872 (metal ion binding), R-HSA-212436 (Homo sapiens: Generic Transcription Pathway), R-HSA-74160 (Homo sapiens: Gene Expression)		0.881903	0.565201		-0.517269	-0.555264	-0.374571				282.66	15.9404	84.7817	-1.74428	2.35835	32.5186	0.00019902	0.00710601	2.43974e-07	3.17153e-07	0.2	0.464103	0.114242	-0.866025	-0.968571	0.0576689	0.00665705		9.6147	7.32549	2.40368	2.28921	2.86152
ENSG00000115233	PSMD14	PC	proteasome 26S subunit, non-ATPase 14	This gene encodes a component of the 26S proteasome. The 26S proteasome is a large multiprotein complex that catalyzes the degradation of ubiquitinated intracellular proteins. The encoded protein is a component of the 19S regulatory cap complex of the 26S proteasome and mediates substrate deubiquitination. A pseudogene of this gene is also located on the long arm of chromosome 2. [provided by Ref…	hsa03050 (Proteasome), hsa05169 (Epstein-Barr virus infection), GO:0000165 (MAPK cascade), GO:0000209 (protein polyubiquitination), GO:0000724 (double-strand break repair via homologous recombination), GO:0002223 (stimulatory C-type lectin receptor signaling pathway), GO:0002479 (antigen processing and presentation of exogenous peptide antigen via MHC class I, TAP-dependent), GO:0006303 (double-s…		0.2506	0.466018		-0.226983	-0.183772	-0.305863				282.55	89.7291	71.0608	-0.608588	7.15439	32.4995	0.000199477	0.00710601	1.71305e-06	1.73419e-06	0.2	0.464103	0.123761	-0.866025	-0.957273	0.0576689	0.0105339		165.739	192.752	118.467	122.13	112.057
ENSG00000146007	ZMAT2	PC	zinc finger matrin-type 2		hsa03040 (Spliceosome), GO:0000398 (mRNA splicing, via spliceosome), GO:0046540 (U4/U6 x U5 tri-snRNP complex), GO:0003677 (DNA binding), GO:0003723 (RNA binding), GO:0005515 (protein binding), GO:0008270 (zinc ion binding)		0.546247	0.288796		-0.22424	-0.159786	-0.451017				282.517	89.9899	21.6287	-0.70566	7.19327	32.4938	0.000199614	0.00710601	6.84181e-07	6.8985e-07	0.2	0.464103	0.105355	-0.866025	-0.938141	0.0576689	0.0182966		207.403	173.179	120.756	126.365	102.9
ENSG00000106399	RPA3	PC	replication protein A3		hsa03030 (DNA replication), hsa03420 (Nucleotide excision repair), hsa03430 (Mismatch repair), hsa03440 (Homologous recombination), hsa03460 (Fanconi anemia pathway), GO:0000082 (G1/S transition of mitotic cell cycle), GO:0000722 (telomere maintenance via recombination), GO:0000724 (double-strand break repair via homologous recombination), GO:0006260 (DNA replication), GO:0006283 (transcription-c…		-0.289672	-0.600202		0.454203	0.203044	0.232628				282.38	89.359	16.7999	0.749385	7.10102	32.47	0.000200187	0.00710601	6.0289e-07	6.1471e-07	0.2	0.464103	0.0293826	0.866025	0.935836	0.0576689	0.0193219		107.936	86.6468	182.107	152.691	155.896
ENSG00000106554	CHCHD3	PC	coiled-coil-helix-coiled-coil-helix domain containing 3		GO:0000122 (negative regulation of transcription from RNA polymerase II promoter), GO:0006351 (transcription, DNA-templated), GO:0007007 (inner mitochondrial membrane organization), GO:0008053 (mitochondrial fusion), GO:0042407 (cristae formation), GO:0005634 (nucleus), GO:0005737 (cytoplasm), GO:0005739 (mitochondrion), GO:0005743 (mitochondrial inner membrane), GO:0061617 (MICOS complex), GO:00…		0.692886	0.23729		-0.210973	-0.443226	-0.275978				282.233	90.2086	35.7702	-0.800268	7.21855	32.4446	0.000200802	0.00710601	3.76991e-07	3.79003e-07	0.2	0.464103	0.217818	-0.866025	-0.894111	0.0576689	0.0406993		231.325	168.143	122.702	104.159	117.208
ENSG00000141499	WRAP53	PC	WD repeat containing antisense to TP53	This gene encodes an essential component of the telomerase holoenzyme complex, a ribonucleoprotein complex required for telomere synthesis. This protein is enriched in Cajal bodies, nuclear sites of RNP processing that are important for telomerase function. It interacts with dyskerin, TERT and TERC, other components of active telomerase, and with small Cajal body RNAs (scaRNAs), which are involve…	GO:0007004 (telomere maintenance via telomerase), GO:0032203 (telomere formation via telomerase), GO:0051973 (positive regulation of telomerase activity), GO:0070200 (establishment of protein localization to telomere), GO:0090666 (NA), GO:0090671 (NA), GO:1904851 (NA), GO:1904867 (NA), GO:0005654 (nucleoplasm), GO:0005697 (telomerase holoenzyme complex), GO:0005829 (cytosol), GO:0015030 (Cajal bo…		-0.431302	-0.352991		0.220464	0.239846	0.323982				282.224	75.5888	68.0491	0.678214	5.85192	32.4429	0.000200843	0.00710601	2.99202e-06	3.27615e-06	0.2	0.464103	0.00103461	0.866025	0.989014	0.0576689	0.00137995		41.0914	43.4951	65.7005	66.6161	70.7367
ENSG00000225921	NOL7	PC	nucleolar protein 7		GO:0005634 (nucleus), GO:0005730 (nucleolus), GO:0005739 (mitochondrion), GO:0003723 (RNA binding)		0.566814	0.205251		-0.26655	-0.258169	-0.247347				281.642	94.3557	18.8189	-0.659993	7.91513	32.3421	0.000203301	0.00715213	9.35582e-07	9.36663e-07	0.2	0.464103	0.209516	-0.866025	-0.914832	0.0576689	0.0294527		348.075	270.471	194.469	195.613	197.101
ENSG00000085733	CTTN	PC	cortactin	This gene is overexpressed in breast cancer and squamous cell carcinomas of the head and neck. The encoded protein is localized in the cytoplasm and in areas of the cell-substratum contacts. This gene has two roles: (1) regulating the interactions between components of adherens-type junctions and (2) organizing the cytoskeleton and cell adhesion structures of epithelia and carcinoma cells. During…	hsa04530 (Tight junction), hsa05100 (Bacterial invasion of epithelial cells), hsa05130 (Pathogenic Escherichia coli infection), hsa05131 (Shigellosis), hsa05205 (Proteoglycans in cancer), GO:0006886 (intracellular protein transport), GO:0006898 (receptor-mediated endocytosis), GO:0006930 (substrate-dependent cell migration, cell extension), GO:0030041 (actin filament polymerization), GO:0030516 (…		-0.436844	-0.246124		0.243978	0.179149	0.259841				281.631	96.3745	39.0679	0.569881	8.43335	32.3401	0.000203349	0.00715213	2.33728e-06	2.40384e-06	0.2	0.464103	0.0567917	0.866025	0.978195	0.0576689	0.00385255		249.868	285.465	401.757	384.016	406.221
ENSG00000139436	GIT2	PC	GIT ArfGAP 2	This gene encodes a member of the GIT protein family, which interact with G protein-coupled receptor kinases and possess ADP-ribosylation factor (ARF) GTPase-activating protein (GAP) activity. GIT proteins traffic between cytoplasmic complexes, focal adhesions, and the cell periphery, and interact with Pak interacting exchange factor beta (PIX) to form large oligomeric complexes that transiently …	hsa04144 (Endocytosis), GO:0008277 (regulation of G-protein coupled receptor protein signaling pathway), GO:0043547 (positive regulation of GTPase activity), GO:0048266 (behavioral response to pain), GO:0005654 (nucleoplasm), GO:0005925 (focal adhesion), GO:0005096 (GTPase activator activity), GO:0005515 (protein binding), GO:0032403 (protein complex binding), GO:0046872 (metal ion binding)		0.462875	0.358428		-0.268554	-0.325421	-0.227328				281.346	69.0444	80.996	-0.716824	5.40118	32.2908	0.000204567	0.00717372	3.21133e-06	3.33655e-06	0.2	0.464103	0.0398887	-0.866025	-0.989899	0.0576689	0.00121684		57.0014	52.8809	33.537	32.1635	34.5671
ENSG00000213516	RBMXL1	PC	RBMX like 1	This gene represents a retrogene of RNA binding motif protein, X-linked (RBMX), which is located on chromosome X. While all introns in the coding sequence have been processed out compared to the RBMX locus, the ORF is intact and there is specific evidence for transcription at this location. The preservation of the ORF by purifying selection in all Old World monkeys carrying it suggests that this …	hsa03040 (Spliceosome), GO:0006397 (mRNA processing), GO:0008380 (RNA splicing), GO:0005634 (nucleus), GO:0030529 (ribonucleoprotein complex), GO:0003723 (RNA binding)		0.665232	0.665232		-0.371451	-0.309588	-0.649424				281.017	30.6359	94.0439	-1.35527	3.19485	31.6163	0.000222112	0.00758754	8.55566e-07	9.97323e-07	0.138641	0.464103	0.00371256	-0.888523	-0.990795	0.043925	0.00105863		14.0787	14.0787	5.8375	6.18088	4.46397
ENSG00000087470	DNM1L	PC	dynamin 1 like	This gene encodes a member of the dynamin superfamily of GTPases. The encoded protein mediates mitochondrial and peroxisomal division, and is involved in developmentally regulated apoptosis and programmed necrosis. Dysfunction of this gene is implicated in several neurological disorders, including Alzheimer_s disease. Mutations in this gene are associated with the autosomal dominant disorder, enc…	hsa04217 (Necroptosis), hsa04621 (NOD-like receptor signaling pathway), hsa04668 (TNF signaling pathway), GO:0000266 (mitochondrial fission), GO:0001836 (release of cytochrome c from mitochondria), GO:0003374 (dynamin polymerization involved in mitochondrial fission), GO:0006897 (endocytosis), GO:0007005 (mitochondrion organization), GO:0010637 (negative regulation of mitochondrial fusion), GO:00…		0.284005	0.913417		-0.328914	-0.521998	-0.34651				280.907	65.503	52.671	-1.08651	5.19034	32.2149	0.000206456	0.00721866	4.08892e-07	4.27737e-07	0.2	0.464103	0.25113	-0.866025	-0.875884	0.0576689	0.0515016		41.3203	65.0137	26.326	22.7777	25.9826
ENSG00000124222	STX16	PC	syntaxin 16	This gene encodes a protein that is a member of the syntaxin or t-SNARE (target-SNAP receptor) family. These proteins are found on cell membranes and serve as the targets for V-SNARES (vesicle-SNAP receptors) permitting specific synaptic vesicle docking and fusion. A microdeletion in the region of chromosome 20 where this gene is located has been associated with pseudohypoparathyroidism type Ib. …	hsa04130 (SNARE interactions in vesicular transport), GO:0006886 (intracellular protein transport), GO:0006906 (vesicle fusion), GO:0042147 (retrograde transport, endosome to Golgi), GO:0048278 (vesicle docking), GO:0090161 (Golgi ribbon formation), GO:0000139 (Golgi membrane), GO:0005737 (cytoplasm), GO:0005794 (Golgi apparatus), GO:0005802 (trans-Golgi network), GO:0005829 (cytosol), GO:0005925…		-0.365426	-0.451124		0.331703	0.331703	0.153143				280.612	74.8906	68.9409	0.708705	5.80779	31.5476	0.000223997	0.00760823	3.05502e-06	3.3545e-06	0.138641	0.464103	0.0051291	0.888523	0.970637	0.043925	0.00601322		41.6637	39.1456	68.7909	68.7909	60.5497
ENSG00000276788	SNORD26	snoRNA	small nucleolar RNA, C/D box 26				0.758058	0.652073		-0.571301	-0.448304	-0.390527				280.461	0.521534	0.319677	-2.45055	1.25144	32.1378	0.000208396	0.00726139	3.27596e-08	5.58142e-08	0.2	0.464103	0.0180818	-0.866025	-0.994313	0.0576689	0.000514403		4.46397	4.00613	0.572304	0.801225	0.915686
ENSG00000155561	NUP205	PC	nucleoporin 205		hsa03013 (RNA transport), GO:0006406 (mRNA export from nucleus), GO:0006409 (tRNA export from nucleus), GO:0006913 (nucleocytoplasmic transport), GO:0007077 (mitotic nuclear envelope disassembly), GO:0010827 (regulation of glucose transport), GO:0016032 (viral process), GO:0016925 (protein sumoylation), GO:0019083 (viral transcription), GO:0031047 (gene silencing by RNA), GO:0051292 (nuclear pore…		0.633972	0.224297		-0.304713	-0.248842	-0.304713				279.889	82.4445	64.2887	-0.746714	6.38468	31.4251	0.000227411	0.00761538	1.13953e-06	1.16068e-06	0.138641	0.464103	0.216444	-0.888523	-0.908182	0.043925	0.0329344		125.792	94.2012	64.6703	67.3029	64.6703
ENSG00000113593	PPWD1	PC	peptidylprolyl isomerase domain and WD repeat containing 1		GO:0000398 (mRNA splicing, via spliceosome), GO:0000413 (protein peptidyl-prolyl isomerization), GO:0006457 (protein folding), GO:0005654 (nucleoplasm), GO:0016604 (nuclear body), GO:0071013 (catalytic step 2 spliceosome), GO:0003755 (peptidyl-prolyl cis-trans isomerase activity), R-HSA-72163 (Homo sapiens: mRNA Splicing - Major Pathway), R-HSA-72172 (Homo sapiens: mRNA Splicing), R-HSA-72203 (Ho…		0.694407	0.28677		-0.238522	-0.486999	-0.255657				279.565	75.7571	34.0288	-0.855945	5.86104	31.9829	0.00021236	0.00736017	6.74857e-07	6.90482e-07	0.2	0.464103	0.184633	-0.866025	-0.914208	0.0576689	0.0297739		90.5384	67.7608	46.4711	38.8022	45.8988
ENSG00000126524	SBDS	PC	SBDS, ribosome maturation factor	This gene encodes a member of a highly conserved protein family that exists from archaea to vertebrates and plants. The encoded protein may function in RNA metabolism. Mutations within this gene are associated with Shwachman-Bodian-Diamond syndrome. An alternative transcript has been described, but its biological nature has not been determined. This gene has a closely linked pseudogene that is di…	hsa03008 (Ribosome biogenesis in eukaryotes), GO:0001833 (inner cell mass cell proliferation), GO:0006364 (rRNA processing), GO:0007052 (mitotic spindle organization), GO:0008283 (cell proliferation), GO:0030282 (bone mineralization), GO:0030595 (leukocyte chemotaxis), GO:0042256 (mature ribosome assembly), GO:0048539 (bone marrow development), GO:0000922 (spindle pole), GO:0005634 (nucleus), GO:…		0.586282	0.467874		-0.648742	-0.353814	-0.0516009				278.956	90.9152	29.3766	-0.869918	7.30672	31.878	0.000215097	0.00741325	2.73809e-07	2.7481e-07	0.2	0.464103	0.0105502	-0.866025	-0.944575	0.0576689	0.0155327		226.06	208.09	94.8879	116.864	144.564
ENSG00000271810	AL603832.3	PC					-0.403124	-0.458713		0.236134	0.203677	0.422026				278.947	71.61	11.9963	0.754274	5.57752	31.8764	0.000215139	0.00741325	2.6354e-06	2.92127e-06	0.2	0.464103	0.0112268	0.866025	0.963921	0.0576689	0.0081817		34.3382	32.9647	54.5978	53.3387	62.3811
ENSG00000203950	RTL8A	PC	retrotransposon Gag like 8A		GO:0005515 (protein binding)		0.459484	0.310194		-0.382027	-0.134623	-0.253028				278.652	84.8166	14.8566	-0.652843	6.59163	31.8256	0.000216479	0.00743787	1.72139e-06	1.75665e-06	0.2	0.464103	0.0363255	-0.866025	-0.964998	0.0576689	0.00781943		129.57	116.635	71.4235	85.1588	78.2911
ENSG00000163751	CPA3	PC	carboxypeptidase A3	Three different forms of human pancreatic procarboxypeptidase A have been isolated. This gene encodes a form which is obtained as a binary complex of a procarboxypeptidase A with proproteinase E and functions as a secretory granule metalloexopeptidase. [provided by RefSeq, Jan 2009].	hsa04614 (Renin-angiotensin system), hsa04972 (Pancreatic secretion), hsa04974 (Protein digestion and absorption), GO:0002003 (angiotensin maturation), GO:0006508 (proteolysis), GO:0005576 (extracellular region), GO:0005615 (extracellular space), GO:0030133 (transport vesicle), GO:0030141 (secretory granule), GO:0004181 (metallocarboxypeptidase activity), GO:0008270 (zinc ion binding), R-HSA-2022…		0.521484	0.653265		-0.613814	-0.317073	-0.243863				277.798	48.8812	34.3484	-1.07817	4.21633	31.6786	0.000220418	0.00755138	1.4985e-06	1.6235e-06	0.2	0.464103	0.0089496	-0.866025	-0.978056	0.0576689	0.00388928		25.5247	28.1573	10.5304	13.3919	14.1931
ENSG00000103018	CYB5B	PC	cytochrome b5 type B		GO:0006805 (xenobiotic metabolic process), GO:0055114 (oxidation-reduction process), GO:0005741 (mitochondrial outer membrane), GO:0016020 (membrane), GO:0016021 (integral component of membrane), GO:0005515 (protein binding), GO:0020037 (heme binding), GO:0046872 (metal ion binding), R-HSA-1430728 (Homo sapiens: Metabolism), R-HSA-211859 (Homo sapiens: Biological oxidations), R-HSA-211945 (Homo s…		-0.431469	-0.322555		0.394691	0.246382	0.112951				277.209	92.2863	76.2009	0.639368	7.5061	31.5773	0.00022318	0.00760217	1.74313e-06	1.78284e-06	0.2	0.464103	0.0147241	0.866025	0.938798	0.0576689	0.0180075		130.829	141.245	233.5	210.493	191.722
ENSG00000132361	CLUH	PC	clustered mitochondria homolog		GO:0007005 (mitochondrion organization), GO:0048312 (intracellular distribution of mitochondria), GO:0005737 (cytoplasm), GO:0003729 (mRNA binding)		-0.402875	-0.445735		0.314299	0.370281	0.16403				276.733	70.8025	66.0469	0.743266	5.52756	31.4955	0.000225441	0.00761538	3.3886e-06	3.75625e-06	0.2	0.464103	0.00908495	0.866025	0.97157	0.0576689	0.00572983		33.1936	32.1635	55.8568	58.146	50.1338
ENSG00000055917	PUM2	PC	pumilio RNA binding family member 2	This gene encodes a protein that belongs to a family of RNA-binding proteins. The encoded protein functions as a translational repressor during embryonic development and cell differentiation. This protein is also thought to be a positive regulator of cell proliferation in adipose-derived stem cells. Alternate splicing results in multiple transcript variants. [provided by RefSeq, Sep 2013].	GO:0010608 (posttranscriptional regulation of gene expression), GO:0034063 (stress granule assembly), GO:0043488 (regulation of mRNA stability), GO:0051983 (regulation of chromosome segregation), GO:0060964 (regulation of gene silencing by miRNA), GO:1900246 (positive regulation of RIG-I signaling pathway), GO:2000637 (positive regulation of gene silencing by miRNA), GO:0005829 (cytosol), GO:0010…		0.423795	0.588576		-0.34266	-0.399439	-0.270272				276.611	52.9273	86.7839	-0.922827	4.44581	31.4745	0.000226027	0.00761538	3.49561e-06	3.74139e-06	0.2	0.464103	0.0664836	-0.866025	-0.983936	0.0576689	0.00243818		28.2718	31.9345	15.7956	15.1088	16.7113
ENSG00000266086	AC015813.2	PC					0.229824	0.882929		-0.343711	-0.518386	-0.250656				276.565	87.7439	10.0951	-0.975819	6.89945	31.4667	0.000226245	0.00761538	2.33821e-07	2.35122e-07	0.2	0.464103	0.269378	-0.866025	-0.855659	0.0576689	0.0643848		130.943	207.059	87.3335	77.1465	93.2855
ENSG00000122033	MTIF3	PC	mitochondrial translational initiation factor 3	This gene encodes a translation initiation factor that is involved in mitochondrial protein synthesis. Polymorphism in this gene is associated with the onset of Parkinson_s disease. Alternate splicing results in multiple transcript variants. A pseudogene of this gene is found on chromosome 5. [provided by RefSeq, Oct 2009].	GO:0032790 (ribosome disassembly), GO:0070124 (mitochondrial translational initiation), GO:0005739 (mitochondrion), GO:0003743 (translation initiation factor activity), GO:0005515 (protein binding), GO:0008135 (translation factor activity, nucleic acid binding), GO:0043024 (ribosomal small subunit binding), R-HSA-1852241 (Homo sapiens: Organelle biogenesis and maintenance), R-HSA-5368286 (Homo sa…		0.619861	0.246117		-0.179723	-0.361785	-0.32447				276.353	82.8062	11.0457	-0.748454	6.41789	31.4303	0.000227263	0.00761538	1.06116e-06	1.08022e-06	0.2	0.464103	0.189657	-0.866025	-0.915814	0.0576689	0.0289491		127.395	97.8639	72.3392	63.5257	65.2426
ENSG00000113048	MRPS27	PC	mitochondrial ribosomal protein S27	Mammalian mitochondrial ribosomal proteins are encoded by nuclear genes and help in protein synthesis within the mitochondrion. Mitochondrial ribosomes (mitoribosomes) consist of a small 28S subunit and a large 39S subunit. They have an estimated 75% protein to rRNA composition compared to prokaryotic ribosomes, where this ratio is reversed. Another difference between mammalian mitoribosomes and …	GO:0070125 (mitochondrial translational elongation), GO:0070126 (mitochondrial translational termination), GO:0005739 (mitochondrion), GO:0005743 (mitochondrial inner membrane), GO:0005840 (ribosome), GO:0005515 (protein binding), R-HSA-1852241 (Homo sapiens: Organelle biogenesis and maintenance), R-HSA-5368286 (Homo sapiens: Mitochondrial translation initiation), R-HSA-5368287 (Homo sapiens: Mit…		0.30359	0.36967		-0.191291	-0.263496	-0.218474				276.024	83.7736	32.2369	-0.573227	6.50737	31.3738	0.000228858	0.0076423	4.71247e-06	4.83837e-06	0.2	0.464103	0.0207813	-0.866025	-0.993514	0.0576689	0.000626393		110.34	115.605	77.7188	73.8272	76.2308
ENSG00000113732	ATP6V0E1	PC	ATPase H+ transporting V0 subunit e1	This gene encodes a component of vacuolar ATPase (V-ATPase), a multisubunit enzyme that mediates acidification of eukaryotic intracellular organelles. V-ATPase dependent organelle acidification is necessary for such intracellular processes as protein sorting, zymogen activation, receptor-mediated endocytosis, and synaptic vesicle proton gradient generation. V-ATPase is composed of a cytosolic V1 …	hsa00190 (Oxidative phosphorylation), hsa01100 (Metabolic pathways), hsa04145 (Phagosome), hsa04721 (Synaptic vesicle cycle), hsa04966 (Collecting duct acid secretion), hsa05110 (Vibrio cholerae infection), hsa05120 (Epithelial cell signaling in Helicobacter pylori infection), hsa05165 (Human papillomavirus infection), hsa05323 (Rheumatoid arthritis), GO:0007035 (vacuolar acidification), GO:00082…		0.277525	0.380439		-0.299726	-0.118358	-0.23988				275.621	95.4492	15.7146	-0.550935	8.17842	31.3048	0.000230821	0.00768626	3.30408e-06	3.30585e-06	0.2	0.464103	0.0181663	-0.866025	-0.974038	0.0576689	0.00500204		344.756	370.395	230.409	261.543	240.253
ENSG00000138750	NUP54	PC	nucleoporin 54	The nuclear envelope creates distinct nuclear and cytoplasmic compartments in eukaryotic cells. It consists of two concentric membranes perforated by nuclear pores, large protein complexes that form aqueous channels to regulate the flow of macromolecules between the nucleus and the cytoplasm. These complexes are composed of at least 100 different polypeptide subunits, many of which belong to the …	hsa03013 (RNA transport), GO:0006406 (mRNA export from nucleus), GO:0006409 (tRNA export from nucleus), GO:0006607 (NLS-bearing protein import into nucleus), GO:0006999 (nuclear pore organization), GO:0007077 (mitotic nuclear envelope disassembly), GO:0010827 (regulation of glucose transport), GO:0016032 (viral process), GO:0016925 (protein sumoylation), GO:0019083 (viral transcription), GO:00310…		0.438992	0.593837		-0.552781	-0.354734	-0.125314				275.228	65.5535	20.7874	-0.898761	5.19124	31.2374	0.00023276	0.00772842	1.17386e-06	1.22552e-06	0.2	0.464103	0.01499	-0.866025	-0.961853	0.0576689	0.00889264		47.5012	53.1098	22.8921	26.5549	31.4767
ENSG00000269292	AC093503.2	antisense					0.856623	0.519037		-0.918501	-0.297097	-0.160063				274.842	76.8758	1.2703	-1.15756	5.94653	31.1714	0.000234678	0.00772842	1.94438e-07	1.96514e-07	0.2	0.464103	0.0737971	-0.866025	-0.92938	0.0576689	0.022288		102.786	80.9237	28.6152	45.0975	49.7904
ENSG00000108468	CBX1	PC	chromobox 1	This gene encodes a highly conserved nonhistone protein, which is a member of the heterochromatin protein family . The protein is enriched in the heterochromatin and associated with centromeres. The protein has a single N-terminal chromodomain which can bind to histone proteins via methylated lysine residues, and a C-terminal chromo shadow-domain (CSD) which is responsible for the homodimerizatio…	GO:0045892 (negative regulation of transcription, DNA-templated), GO:0000775 (chromosome, centromeric region), GO:0000784 (nuclear chromosome, telomeric region), GO:0000785 (chromatin), GO:0001939 (female pronucleus), GO:0001940 (male pronucleus), GO:0005654 (nucleoplasm), GO:0005720 (nuclear heterochromatin), GO:0005721 (pericentric heterochromatin), GO:0005819 (spindle), GO:0010369 (chromocente…		0.235785	0.383621		-0.223094	-0.179062	-0.21725				274.778	96.6269	35.4841	-0.5207	8.51696	31.1604	0.000234999	0.00772842	4.7484e-06	4.73987e-06	0.2	0.464103	0.102187	-0.866025	-0.975676	0.0576689	0.00453728		424.42	470.434	308.243	317.857	309.502
ENSG00000163636	PSMD6	PC	proteasome 26S subunit, non-ATPase 6	This gene encodes a member of the protease subunit S10 family. The encoded protein is a subunit of the 26S proteasome which colocalizes with DNA damage foci and is involved in the ATP-dependent degradation of ubiquinated proteins. Alternative splicing results in multiple transcript variants [provided by RefSeq, Nov 2012].	hsa03050 (Proteasome), hsa05169 (Epstein-Barr virus infection), GO:0000165 (MAPK cascade), GO:0000209 (protein polyubiquitination), GO:0002223 (stimulatory C-type lectin receptor signaling pathway), GO:0002479 (antigen processing and presentation of exogenous peptide antigen via MHC class I, TAP-dependent), GO:0006508 (proteolysis), GO:0006521 (regulation of cellular amino acid metabolic process)…		0.361244	0.294374		-0.295517	-0.241227	-0.118875				274.517	93.5565	54.4376	-0.549805	7.74575	31.1158	0.000236309	0.00772842	3.739e-06	3.75816e-06	0.2	0.464103	0.00357011	-0.866025	-0.980186	0.0576689	0.00333809		270.929	258.567	171.119	177.758	193.668
ENSG00000011304	PTBP1	PC	polypyrimidine tract binding protein 1	This gene belongs to the subfamily of ubiquitously expressed heterogeneous nuclear ribonucleoproteins (hnRNPs). The hnRNPs are RNA-binding proteins and they complex with heterogeneous nuclear RNA (hnRNA). These proteins are associated with pre-mRNAs in the nucleus and appear to influence pre-mRNA processing and other aspects of mRNA metabolism and transport. While all of the hnRNPs are present in…	GO:0000380 (alternative mRNA splicing, via spliceosome), GO:0000381 (regulation of alternative mRNA splicing, via spliceosome), GO:0000398 (mRNA splicing, via spliceosome), GO:0006397 (mRNA processing), GO:0008380 (RNA splicing), GO:0008543 (fibroblast growth factor receptor signaling pathway), GO:0010467 (gene expression), GO:0033119 (negative regulation of RNA splicing), GO:0048025 (negative re…		-0.37628	-0.262645		0.187947	0.173886	0.277091				274.478	96.6353	59.5104	0.535104	8.51894	31.1091	0.000236504	0.00772842	4.69428e-06	4.82423e-06	0.2	0.464103	0.00816844	0.866025	0.980632	0.0576689	0.00322628		277.338	300.23	411.028	407.022	437.354
ENSG00000009844	VTA1	PC	vesicle trafficking 1	C6ORF55 encodes a protein involved in trafficking of the multivesicular body, an endosomal compartment involved in sorting membrane proteins for degradation in lysosomes (Ward et al., 2005 [PubMed 15644320]).[supplied by OMIM, Mar 2008].	hsa04144 (Endocytosis), GO:0015031 (protein transport), GO:0016197 (endosomal transport), GO:0016236 (macroautophagy), GO:0019058 (viral life cycle), GO:0036258 (multivesicular body assembly), GO:0046755 (viral budding), GO:0071985 (multivesicular body sorting pathway), GO:1904903 (NA), GO:0005654 (nucleoplasm), GO:0005829 (cytosol), GO:0010008 (endosome membrane), GO:0043231 (intracellular membr…		0.41897	0.671175		-0.64522	-0.35062	-0.0943053				274.434	76.9179	90.1826	-0.925527	5.94867	31.1015	0.000236727	0.00772842	4.80014e-07	4.88468e-07	0.2	0.464103	0.0518586	-0.866025	-0.936865	0.0576689	0.0188618		78.2911	93.6289	36.3985	45.0975	54.2544
ENSG00000165490	DDIAS	PC	DNA damage induced apoptosis suppressor		GO:0006915 (apoptotic process), GO:0007050 (cell cycle arrest), GO:0005634 (nucleus), GO:0005737 (cytoplasm)		0.803901	0.28951		-0.305337	-0.352101	-0.435973				274.43	61.7261	50.0126	-0.993304	4.96039	31.1009	0.000236747	0.00772842	1.28871e-06	1.35299e-06	0.2	0.464103	0.224042	-0.866025	-0.900611	0.0576689	0.0370472		52.1941	35.9407	23.1211	22.3198	20.9463
ENSG00000095139	ARCN1	PC	archain 1	This gene maps in a region, which include the mixed lineage leukemia and Friend leukemia virus integration 1 genes, where multiple disease-associated chromosome translocations occur. It is an intracellular protein. Archain sequences are well conserved among eukaryotes and this protein may play a fundamental role in eukaryotic cell biology. It has similarities to heat shock proteins and clathrin-a…	GO:0006886 (intracellular protein transport), GO:0006888 (ER to Golgi vesicle-mediated transport), GO:0006890 (retrograde vesicle-mediated transport, Golgi to ER), GO:0008344 (adult locomotory behavior), GO:0021691 (cerebellar Purkinje cell layer maturation), GO:0043473 (pigmentation), GO:0000139 (Golgi membrane), GO:0005789 (endoplasmic reticulum membrane), GO:0005829 (cytosol), GO:0016020 (memb…		0.461507	0.40345		-0.517175	-0.217003	-0.130779				274.323	83.1595	86.439	-0.727832	6.45299	31.0826	0.000237288	0.00772842	1.15768e-06	1.17937e-06	0.2	0.464103	0.00781376	-0.866025	-0.962332	0.0576689	0.00872616		116.979	112.286	58.375	72.3392	76.9176
ENSG00000111799	COL12A1	PC	collagen type XII alpha 1 chain	This gene encodes the alpha chain of type XII collagen, a member of the FACIT (fibril-associated collagens with interrupted triple helices) collagen family. Type XII collagen is a homotrimer found in association with type I collagen, an association that is thought to modify the interactions between collagen I fibrils and the surrounding matrix. Alternatively spliced transcript variants encoding d…	hsa04974 (Protein digestion and absorption), GO:0001501 (skeletal system development), GO:0007155 (cell adhesion), GO:0030199 (collagen fibril organization), GO:0030574 (collagen catabolic process), GO:0035987 (endodermal cell differentiation), GO:0005576 (extracellular region), GO:0005595 (collagen type XII trimer), GO:0005615 (extracellular space), GO:0005788 (endoplasmic reticulum lumen), GO:0…		0.514412	0.269195		-0.394586	-0.17608	-0.21294				274.094	86.5074	98.3091	-0.666921	6.76744	31.0435	0.000238446	0.00774493	1.78899e-06	1.81662e-06	0.2	0.464103	0.115336	-0.866025	-0.944203	0.0576689	0.0156886		151.775	127.738	79.8936	93.2855	90.8818
ENSG00000162434	JAK1	PC	Janus kinase 1	Janus kinase 1 (JAK1), is a member of a new class of protein-tyrosine kinases (PTK) characterized by the presence of a second phosphotransferase-related domain immediately N-terminal to the PTK domain. The second phosphotransferase domain bears all the hallmarks of a protein kinase, although its structure differs significantly from that of the PTK and threonine/serine kinase family members. JAK1 …	hsa01521 (EGFR tyrosine kinase inhibitor resistance), hsa04151 (PI3K-Akt signaling pathway), hsa04217 (Necroptosis), hsa04380 (Osteoclast differentiation), hsa04550 (Signaling pathways regulating pluripotency of stem cells), hsa04621 (NOD-like receptor signaling pathway), hsa04630 (JAK-STAT signaling pathway), hsa04658 (Th1 and Th2 cell differentiation), hsa04659 (Th17 cell differentiation), hsa0…		0.410611	0.339116		-0.368753	-0.262793	-0.118181				273.286	83.1763	44.4014	-0.635486	6.45375	30.9055	0.000242596	0.00785825	2.78537e-06	2.85165e-06	0.2	0.464103	0.00346866	-0.866025	-0.974728	0.0576689	0.00480437		114.003	108.394	65.586	70.7367	78.4056
ENSG00000118680	MYL12B	PC	myosin light chain 12B	The activity of nonmuscle myosin II (see MYH9; MIM 160775) is regulated by phosphorylation of a regulatory light chain, such as MRLC2. This phosphorylation results in higher MgATPase activity and the assembly of myosin II filaments (Iwasaki et al., 2001 [PubMed 11942626]).[supplied by OMIM, Mar 2008].	hsa04510 (Focal adhesion), hsa04530 (Tight junction), hsa04611 (Platelet activation), hsa04670 (Leukocyte transendothelial migration), hsa04810 (Regulation of actin cytoskeleton), GO:0006936 (muscle contraction), GO:0008360 (regulation of cell shape), GO:0001725 (stress fiber), GO:0005829 (cytosol), GO:0005903 (brush border), GO:0016460 (myosin II complex), GO:0030018 (Z disc), GO:0045177 (apical…		0.254158	0.327544		-0.211	-0.211359	-0.159343				273.097	99.041	32.3294	-0.48589	10.0743	30.8733	0.000243577	0.0078686	8.13885e-06	8.0657e-06	0.2	0.464103	0.0364566	-0.866025	-0.991234	0.0576689	0.000983947		1268	1334.27	917.975	917.746	951.512
ENSG00000243943	ZNF512	PC	zinc finger protein 512	This gene encodes a protein containing four putative zinc finger motifs. Zinc finger motifs may bind to proteins or nucleic acids. Zinc finger-containing proteins are involved in a variety of processes, including regulation of transcription. Alternative splicing results in multiple transcript variants for this gene. [provided by RefSeq, Sep 2012].	GO:0006351 (transcription, DNA-templated), GO:0006355 (regulation of transcription, DNA-templated), GO:0005634 (nucleus), GO:0003677 (DNA binding), GO:0046872 (metal ion binding)		0.527899	0.369385		-0.312849	-0.386386	-0.198049				272.923	63.6104	85.951	-0.791784	5.0775	30.8436	0.000244487	0.00787658	3.73243e-06	3.90589e-06	0.2	0.464103	0.0520513	-0.866025	-0.977522	0.0576689	0.00403188		47.5012	42.3505	25.6392	24.2657	27.9284
ENSG00000164713	BRI3	PC	brain protein I3		GO:0043312 (neutrophil degranulation), GO:0005886 (plasma membrane), GO:0016021 (integral component of membrane), GO:0035577 (azurophil granule membrane), GO:0042802 (identical protein binding), R-HSA-168249 (Homo sapiens: Innate Immune System), R-HSA-168256 (Homo sapiens: Immune System), R-HSA-6798695 (Homo sapiens: Neutrophil degranulation)		-0.270104	-0.352207		0.239469	0.22066	0.162182				272.698	95.2557	24.1272	0.522284	8.12654	30.8052	0.000245666	0.00789318	6.03058e-06	6.17494e-06	0.2	0.464103	0.00452281	0.866025	0.98951	0.0576689	0.00128771		227.662	214.957	324.954	320.719	307.899
ENSG00000134108	ARL8B	PC	ADP ribosylation factor like GTPase 8B		GO:0007049 (cell cycle), GO:0007059 (chromosome segregation), GO:0007264 (small GTPase mediated signal transduction), GO:0032418 (lysosome localization), GO:0051301 (cell division), GO:0005737 (cytoplasm), GO:0005765 (lysosomal membrane), GO:0016020 (membrane), GO:0030496 (midbody), GO:0031902 (late endosome membrane), GO:0051233 (spindle midzone), GO:0070062 (extracellular vesicular exosome), GO…		0.293818	0.622991		-0.313283	-0.313283	-0.290243				272.612	64.5357	49.3144	-0.817332	5.12654	30.2006	0.000265194	0.00827461	3.78404e-06	3.94798e-06	0.138641	0.464103	0.169874	-0.888523	-0.942732	0.043925	0.0163095		41.3203	52.423	26.4404	26.4404	26.8983
ENSG00000100664	EIF5	PC	eukaryotic translation initiation factor 5	Eukaryotic translation initiation factor-5 (EIF5) interacts with the 40S initiation complex to promote hydrolysis of bound GTP with concomitant joining of the 60S ribosomal subunit to the 40S initiation complex. The resulting functional 80S ribosomal initiation complex is then active in peptidyl transfer and chain elongations (summary by Si et al., 1996 [PubMed 8663286]).[supplied by OMIM, May 20…	hsa03013 (RNA transport), GO:0001731 (formation of translation preinitiation complex), GO:0006413 (translational initiation), GO:0006446 (regulation of translational initiation), GO:0090630 (NA), GO:0005737 (cytoplasm), GO:0005829 (cytosol), GO:0005886 (plasma membrane), GO:0003723 (RNA binding), GO:0003743 (translation initiation factor activity), GO:0003924 (GTPase activity), GO:0005515 (protei…		0.339383	0.311836		-0.155636	-0.201685	-0.293899				272.566	89.1403	36.9479	-0.549499	7.07211	30.7828	0.000246359	0.00789412	5.03406e-06	5.11061e-06	0.2	0.464103	0.00105287	-0.866025	-0.989968	0.0576689	0.00120441		167.456	164.251	118.238	114.461	107.25
ENSG00000269987	AC004542.2	lincRNA					0.452716	1.02234		-0.635968	-0.31109	-0.527998				272.288	28.2301	4.87087	-1.57587	3.0667	30.7354	0.00024783	0.00791991	8.44937e-07	9.94928e-07	0.2	0.464103	0.20023	-0.866025	-0.912787	0.0576689	0.0305098		10.5304	16.5968	3.89166	5.37965	4.34951
ENSG00000146066	HIGD2A	PC	HIG1 hypoxia inducible domain family member 2A		GO:0043066 (negative regulation of apoptotic process), GO:0055114 (oxidation-reduction process), GO:0005743 (mitochondrial inner membrane), GO:0016021 (integral component of membrane), GO:0070469 (respiratory chain)		-0.350871	-0.293996		0.285202	0.16377	0.195894				271.971	92.3368	8.56398	0.544242	7.51407	30.6814	0.000249521	0.00795255	5.57935e-06	5.685e-06	0.2	0.464103	0.00215023	0.866025	0.982255	0.0576689	0.00282998		140.329	146.052	219.192	201.336	205.915
ENSG00000129083	COPB1	PC	coatomer protein complex subunit beta 1	This gene encodes a protein subunit of the coatomer complex associated with non-clathrin coated vesicles. The coatomer complex, also known as the coat protein complex 1, forms in the cytoplasm and is recruited to the Golgi by activated guanosine triphosphatases. Once at the Golgi membrane, the coatomer complex may assist in the movement of protein and lipid components back to the endoplasmic reti…	GO:0006886 (intracellular protein transport), GO:0006888 (ER to Golgi vesicle-mediated transport), GO:0006890 (retrograde vesicle-mediated transport, Golgi to ER), GO:0006891 (intra-Golgi vesicle-mediated transport), GO:0016032 (viral process), GO:0043312 (neutrophil degranulation), GO:0000139 (Golgi membrane), GO:0005789 (endoplasmic reticulum membrane), GO:0005793 (endoplasmic reticulum-Golgi i…		0.387195	0.248365		-0.242911	-0.209358	-0.183291				271.672	91.5882	32.3631	-0.537289	7.39276	30.6306	0.000251124	0.00798224	5.4444e-06	5.49911e-06	0.2	0.464103	0.0906632	-0.866025	-0.978597	0.0576689	0.00374658		216.331	196.3	139.07	142.389	145.022
ENSG00000155313	USP25	PC	ubiquitin specific peptidase 25	Ubiquitin (MIM 191339) is a highly conserved 76-amino acid protein involved in regulation of intracellular protein breakdown, cell cycle regulation, and stress response. Ubiquitin is released from degraded proteins by disassembly of the polyubiquitin chains, which is mediated by ubiquitin-specific proteases (USPs), such as USP25 (Valero et al., 1999 [PubMed 10644437]).[supplied by OMIM, Mar 2008].	hsa04657 (IL-17 signaling pathway), GO:0006464 (cellular protein modification process), GO:0006508 (proteolysis), GO:0006511 (ubiquitin-dependent protein catabolic process), GO:0016579 (protein deubiquitination), GO:0070536 (protein K63-linked deubiquitination), GO:0071108 (protein K48-linked deubiquitination), GO:1904293 (NA), GO:0005634 (nucleus), GO:0005783 (endoplasmic reticulum), GO:0005829 …		0.758128	0.634672		-0.801123	-0.398113	-0.193564				270.981	42.4125	79.5659	-1.30568	3.8502	30.5131	0.000254877	0.00806423	8.46456e-07	9.3961e-07	0.2	0.464103	0.00436089	-0.866025	-0.971754	0.0576689	0.00567444		23.1211	21.0608	6.52426	9.27132	10.9882
ENSG00000115816	CEBPZ	PC	CCAAT enhancer binding protein zeta		GO:0006366 (transcription from RNA polymerase II promoter), GO:0045944 (positive regulation of transcription from RNA polymerase II promoter), GO:0005634 (nucleus), GO:0000978 (RNA polymerase II core promoter proximal region sequence-specific DNA binding), GO:0001077 (RNA polymerase II core promoter proximal region sequence-specific DNA binding transcription factor activity involved in positive r…		0.377866	0.445325		-0.197411	-0.378297	-0.247482				270.89	68.7332	54.8751	-0.716759	5.38468	30.4977	0.000255375	0.00806423	4.92123e-06	5.10676e-06	0.2	0.464103	0.00251137	-0.866025	-0.987809	0.0576689	0.0016128		52.9953	55.6279	34.9105	30.561	33.6515
ENSG00000070770	CSNK2A2	PC	casein kinase 2 alpha 2		hsa03008 (Ribosome biogenesis in eukaryotes), hsa04064 (NF-kappa B signaling pathway), hsa04137 (Mitophagy - animal), hsa04310 (Wnt signaling pathway), hsa04520 (Adherens junction), hsa05162 (Measles), hsa05168 (Herpes simplex infection), GO:0006351 (transcription, DNA-templated), GO:0006355 (regulation of transcription, DNA-templated), GO:0006457 (protein folding), GO:0006468 (protein phosphoryl…		0.893127	0.265329		-0.201281	-0.392024	-0.56515				270.683	78.3731	63.9102	-1.02155	6.05879	30.4624	0.000256517	0.00806423	4.06939e-07	4.11795e-07	0.2	0.464103	0.251153	-0.866025	-0.86493	0.0576689	0.0583678		116.407	74.6284	53.4532	46.5855	41.0914
ENSG00000064601	CTSA	PC	cathepsin A	This gene encodes a glycoprotein which associates with lysosomal enzymes beta-galactosidase and neuraminidase to form a complex of high molecular weight multimers. The formation of this complex provides a protective role for stability and activity. Deficiencies in this gene are linked to multiple forms of galactosialidosis. Alternatively spliced transcript variants encoding different isoforms hav…	hsa04142 (Lysosome), hsa04614 (Renin-angiotensin system), GO:0006508 (proteolysis), GO:0006687 (glycosphingolipid metabolic process), GO:0006886 (intracellular protein transport), GO:0031647 (regulation of protein stability), GO:0043085 (positive regulation of catalytic activity), GO:0043312 (neutrophil degranulation), GO:0051603 (proteolysis involved in cellular protein catabolic process), GO:19…		0.25294	0.406982		-0.302887	-0.139401	-0.217635				270.6	94.4229	29.6795	-0.554865	7.93132	30.4485	0.000256971	0.00806423	4.15377e-06	4.16416e-06	0.2	0.464103	0.0686606	-0.866025	-0.9659	0.0576689	0.00752036		285.465	317.857	193.553	217.018	205.457
ENSG00000105819	PMPCB	PC	peptidase, mitochondrial processing beta subunit	This gene is a member of the peptidase M16 family and encodes a protein with a zinc-binding motif. This protein is located in the mitochondrial matrix and catalyzes the cleavage of the leader peptides of precursor proteins newly imported into the mitochondria, though it only functions as part of a heterodimeric complex. [provided by RefSeq, Jul 2008].	GO:0006122 (mitochondrial electron transport, ubiquinol to cytochrome c), GO:0009060 (aerobic respiration), GO:0016485 (protein processing), GO:0005739 (mitochondrion), GO:0005750 (mitochondrial respiratory chain complex III), GO:0005759 (mitochondrial matrix), GO:0004222 (metalloendopeptidase activity), GO:0008270 (zinc ion binding), R-HSA-1268020 (Homo sapiens: Mitochondrial protein import), R-…		0.360474	0.4428		-0.443389	-0.228254	-0.131631				270.578	81.3173	59.8385	-0.680969	6.28359	30.4447	0.000257095	0.00806423	2.36812e-06	2.42604e-06	0.2	0.464103	0.00477503	-0.866025	-0.968024	0.0576689	0.00683102		97.4061	103.244	54.9411	64.098	68.6764
ENSG00000264538	SUZ12P1	transcribed_u_Pg	SUZ12 pseudogene 1				1.01052	0.440147		-0.516953	-0.742673	-0.191043				270.046	48.4943	19.0881	-1.35896	4.19305	30.3545	0.000260053	0.00813554	7.30938e-07	7.96812e-07	0.2	0.464103	0.192975	-0.866025	-0.901362	0.0576689	0.0366327		34.4527	22.5488	10.6448	8.81348	13.8497
ENSG00000189050	RNFT1	PC	ring finger protein, transmembrane 1		GO:0016021 (integral component of membrane), GO:0008270 (zinc ion binding)		0.668372	0.70975		-0.196742	-0.540466	-0.640915				268.936	30.0723	36.2665	-1.40474	3.16571	30.1663	0.000266356	0.00828912	1.04875e-06	1.22334e-06	0.2	0.464103	0.00351004	-0.866025	-0.983673	0.0576689	0.00249824		13.7353	14.1931	6.63872	4.80735	4.34951
ENSG00000163138	PACRGL	PC	parkin coregulated like		GO:0005515 (protein binding)		0.656128	0.475966		-0.469905	-0.427871	-0.234317				268.189	43.7752	19.0628	-1.0686	3.92821	30.04	0.000270693	0.00840208	3.93065e-06	4.30153e-06	0.2	0.464103	0.0476884	-0.866025	-0.978857	0.0576689	0.00367885		23.35	20.374	9.6147	9.95808	11.675
ENSG00000100196	KDELR3	PC	KDEL endoplasmic reticulum protein retention receptor 3	This gene encodes a member of the KDEL endoplasmic reticulum protein retention receptor family. Retention of resident soluble proteins in the lumen of the endoplasmic reticulum (ER) is achieved in both yeast and animal cells by their continual retrieval from the cis-Golgi, or a pre-Golgi compartment. Sorting of these proteins is dependent on a C-terminal tetrapeptide signal, usually lys-asp-glu-l…	hsa05110 (Vibrio cholerae infection), GO:0006621 (protein retention in ER lumen), GO:0006890 (retrograde vesicle-mediated transport, Golgi to ER), GO:0015031 (protein transport), GO:0036498 (NA), GO:0000139 (Golgi membrane), GO:0005783 (endoplasmic reticulum), GO:0005789 (endoplasmic reticulum membrane), GO:0016021 (integral component of membrane), GO:0030133 (transport vesicle), GO:0046923 (ER r…		0.642378	0.504658		-0.670507	-0.196704	-0.279826				267.751	56.9987	36.8217	-1.01768	4.67641	29.966	0.00027327	0.00846	1.69846e-06	1.80151e-06	0.2	0.464103	0.0080901	-0.866025	-0.966321	0.0576689	0.00738191		38.2299	34.5671	14.1931	20.4885	19.2294
ENSG00000067334	DNTTIP2	PC	deoxynucleotidyltransferase terminal interacting protein 2	This gene is thought to be involved in chromatin remodeling and gene transcription. The encoded nuclear protein binds to and enhances the transcriptional activity of the estrogen receptor alpha, and also interacts with terminal deoxynucleotidyltransferase. The expression profile of this gene is a potential biomarker for chronic obstructive pulmonary disease. [provided by RefSeq, Dec 2010].	GO:0006351 (transcription, DNA-templated), GO:0006355 (regulation of transcription, DNA-templated), GO:0005634 (nucleus), GO:0005730 (nucleolus), GO:0003723 (RNA binding)		0.631144	0.195259		-0.32333	-0.243906	-0.259166				267.592	89.8721	71.3889	-0.714244	7.1783	29.9391	0.000274214	0.00846717	1.54763e-06	1.55795e-06	0.2	0.464103	0.234252	-0.866025	-0.892844	0.0576689	0.0414242		217.475	160.245	111.256	117.666	116.407
ENSG00000168291	PDHB	PC	pyruvate dehydrogenase E1 beta subunit	The pyruvate dehydrogenase (PDH) complex is a nuclear-encoded mitochondrial multienzyme complex that catalyzes the overall conversion of pyruvate to acetyl-CoA and carbon dioxide, and provides the primary link between glycolysis and the tricarboxylic acid (TCA) cycle. The PDH complex is composed of multiple copies of three enzymatic components: pyruvate dehydrogenase (E1), dihydrolipoamide acetyl…	hsa00010 (Glycolysis / Gluconeogenesis), hsa00020 (Citrate cycle (TCA cycle)), hsa00620 (Pyruvate metabolism), hsa01100 (Metabolic pathways), hsa01200 (Carbon metabolism), hsa04066 (HIF-1 signaling pathway), hsa04922 (Glucagon signaling pathway), hsa05230 (Central carbon metabolism in cancer), GO:0006006 (glucose metabolic process), GO:0006086 (acetyl-CoA biosynthetic process from pyruvate), GO:0…		0.307871	0.338029		-0.182289	-0.241874	-0.221737				267.268	84.7409	55.1948	-0.549088	6.58786	29.8844	0.000276147	0.00850477	8.387e-06	8.5928e-06	0.2	0.464103	0.00103163	-0.866025	-0.997261	0.0576689	0.000171998		117.208	119.726	82.8696	79.4357	80.5804
ENSG00000176871	WSB2	PC	WD repeat and SOCS box containing 2	This gene encodes a member of the WD-protein subfamily. The encoded protein contains five WD-repeats spanning most of the protein and an SOCS box in the C-terminus. The SOCS box may act as a bridge between specific substrate-binding domains and E3 ubiquitin protein ligases. Three transcript variants encoding different isoforms have been found for this gene. [provided by RefSeq, Jun 2013].	GO:0016567 (protein ubiquitination), GO:0035556 (intracellular signal transduction), GO:0005622 (intracellular)		0.265659	0.795614		-0.191446	-0.510383	-0.359444				266.666	74.9495	37.133	-0.934851	5.81133	29.783	0.000279778	0.00859431	9.39301e-07	9.56446e-07	0.2	0.464103	0.227183	-0.866025	-0.883473	0.0576689	0.0469065		63.7546	92.9421	45.8988	36.3985	40.6336
ENSG00000205208	C4orf46	PC	chromosome 4 open reading frame 46	This gene encodes a small, conserved protein of unknown function that is expressed in a variety of tissues. There are pseudogenes for this gene on chromosomes 6, 8, 16, and X. Alternative splicing results in multiple transcript variants. [provided by RefSeq, Feb 2013].	GO:0005737 (cytoplasm), GO:0005515 (protein binding)		0.639848	0.840989		-0.676416	-0.107959	-0.696462				266.53	39.4011	86.0604	-1.41017	3.68542	29.76	0.000280607	0.00859757	9.11999e-07	1.02376e-06	0.2	0.464103	0.0158861	-0.866025	-0.961028	0.0576689	0.00918141		18.6571	21.7475	6.29534	10.3015	6.18088
ENSG00000131495	NDUFA2	PC	NADH:ubiquinone oxidoreductase subunit A2	The encoded protein is a subunit of the hydrophobic protein fraction of the NADH:ubiquinone oxidoreductase (complex 1), the first enzyme complex in the electron transport chain located in the inner mitochondrial membrane, and may be involved in regulating complex I activity or its assembly via assistance in redox processes. Mutations in this gene are associated with Leigh syndrome, an early-onset…	hsa00190 (Oxidative phosphorylation), hsa01100 (Metabolic pathways), hsa04714 (Thermogenesis), hsa04723 (Retrograde endocannabinoid signaling), hsa04932 (Non-alcoholic fatty liver disease (NAFLD)), hsa05010 (Alzheimer disease), hsa05012 (Parkinson disease), hsa05016 (Huntington disease), GO:0006120 (mitochondrial electron transport, NADH to ubiquinone), GO:0032981 (mitochondrial respiratory chain…		-0.30188	-0.539499		0.47967	0.223201	0.138508				266.311	92.9761	9.12762	0.711282	7.64837	29.7232	0.000281944	0.00860699	1.68171e-06	1.73777e-06	0.2	0.464103	0.022354	0.866025	0.910446	0.0576689	0.0317352		157.04	132.889	271.386	226.861	213.813
ENSG00000137288	UQCC2	PC	ubiquinol-cytochrome c reductase complex assembly factor 2	This gene encodes a nucleoid protein localized to the mitochondria inner membrane. The encoded protein affects regulation of insulin secretion, mitochondrial ATP production, and myogenesis through modulation of mitochondrial respiratory chain activity. [provided by RefSeq, Oct 2012].	GO:0002082 (regulation of oxidative phosphorylation), GO:0034551 (mitochondrial respiratory chain complex III assembly), GO:0050796 (regulation of insulin secretion), GO:0070131 (positive regulation of mitochondrial translation), GO:1903364 (positive regulation of cellular protein catabolic process), GO:2001014 (regulation of skeletal muscle cell differentiation), GO:0005739 (mitochondrion), GO:0…		-0.26307	-0.466699		0.311212	0.230928	0.187629				266.243	85.6746	60.7554	0.618058	6.68285	29.7117	0.000282362	0.00860699	4.71988e-06	4.76924e-06	0.2	0.464103	0.0381809	0.866025	0.972412	0.0576689	0.00547783		83.2129	71.9958	124.877	118.009	114.461
ENSG00000107554	DNMBP	PC	dynamin binding protein	DNMBP belongs to the DBL (MIM 311030) family of guanine nucleotide exchange factors and plays a role in the regulation of cell junctions (Otani et al., 2006 [PubMed 17015620]).[supplied by OMIM, Mar 2008]. Publication Note: This RefSeq record includes a subset of the publications that are available for this gene. Please see the Gene record to access additional publications.	GO:0007264 (small GTPase mediated signal transduction), GO:0035023 (regulation of Rho protein signal transduction), GO:0043547 (positive regulation of GTPase activity), GO:0005795 (Golgi stack), GO:0005856 (cytoskeleton), GO:0030054 (cell junction), GO:0045202 (synapse), GO:0005089 (Rho guanyl-nucleotide exchange factor activity), GO:0005515 (protein binding)		0.613268	0.316432		-0.304972	-0.4288	-0.195929				265.933	66.1928	96.4836	-0.820462	5.23136	29.6595	0.000284271	0.00863607	3.46823e-06	3.60682e-06	0.2	0.464103	0.134026	-0.866025	-0.94423	0.0576689	0.0156773		55.8568	45.0975	28.6152	26.097	31.0189
ENSG00000204231	RXRB	PC	retinoid X receptor beta	This gene encodes a member of the retinoid X receptor (RXR) family of nuclear receptors which are involved in mediating the effects of retinoic acid (RA). The encoded protein forms homodimers with the retinoic acid, thyroid hormone, and vitamin D receptors, increasing both DNA binding and transcriptional function on their respective response elements. This gene lies within the major histocompatib…	hsa03320 (PPAR signaling pathway), hsa04659 (Th17 cell differentiation), hsa04919 (Thyroid hormone signaling pathway), hsa04920 (Adipocytokine signaling pathway), hsa04928 (Parathyroid hormone synthesis, secretion and action), hsa05200 (Pathways in cancer), hsa05202 (Transcriptional misregulation in cancer), hsa05216 (Thyroid cancer), hsa05222 (Small cell lung cancer), hsa05223 (Non-small cell lu…		-0.52787	-0.443217		0.228242	0.303668	0.439178				265.853	58.0081	70.8084	0.879919	4.73215	29.646	0.000284769	0.00863607	6.22982e-06	7.14604e-06	0.2	0.464103	0.00508491	0.866025	0.974561	0.0576689	0.00485197		16.9402	18.0848	29.9887	31.7056	35.025
ENSG00000081870	HSPB11	PC	heat shock protein family B (small) member 11		GO:0001501 (skeletal system development), GO:0007224 (smoothened signaling pathway), GO:0007507 (heart development), GO:0030324 (lung development), GO:0035735 (intraciliary transport involved in cilium morphogenesis), GO:0070986 (left/right axis specification), GO:0005813 (centrosome), GO:0005929 (cilium), GO:0030992 (intraciliary transport particle B), GO:0070062 (extracellular vesicular exosome…		0.616341	0.318605		-0.0798134	-0.320827	-0.534305				265.345	90.8143	12.4842	-0.78461	7.29078	29.5606	0.000287935	0.00870985	1.01688e-06	1.02091e-06	0.2	0.464103	0.0997648	-0.866025	-0.918936	0.0576689	0.0273669		230.638	187.258	141.588	119.497	102.786
ENSG00000188549	CCDC9B	PC	coiled-coil domain containing 9B		GO:0003723 (RNA binding)		-0.47834	-0.282832		0.204711	0.183571	0.37289				264.816	84.7325	82.1738	0.647668	6.58751	29.4718	0.000291274	0.0087885	4.20027e-06	4.24362e-06	0.2	0.464103	0.0144941	0.866025	0.955232	0.0576689	0.011294		66.6161	76.5742	108.165	106.563	121.786
ENSG00000058668	ATP2B4	PC	ATPase plasma membrane Ca2+ transporting 4	The protein encoded by this gene belongs to the family of P-type primary ion transport ATPases characterized by the formation of an aspartyl phosphate intermediate during the reaction cycle. These enzymes remove bivalent calcium ions from eukaryotic cells against very large concentration gradients and play a critical role in intracellular calcium homeostasis. The mammalian plasma membrane calcium…	hsa04020 (Calcium signaling pathway), hsa04022 (cGMP-PKG signaling pathway), hsa04024 (cAMP signaling pathway), hsa04261 (Adrenergic signaling in cardiomyocytes), hsa04925 (Aldosterone synthesis and secretion), hsa04970 (Salivary secretion), hsa04972 (Pancreatic secretion), GO:0003407 (neural retina development), GO:0006357 (regulation of transcription from RNA polymerase II promoter), GO:0006874…		0.442153	0.282341		-0.297962	-0.230915	-0.195616				263.822	77.8853	95.9956	-0.623709	6.01758	29.3049	0.000297674	0.00895884	7.55892e-06	7.81124e-06	0.2	0.464103	0.0864161	-0.866025	-0.975284	0.0576689	0.00464702		86.4178	77.1465	50.935	53.4532	54.8267
ENSG00000255248	MIR100HG	processed_transcript	mir-100-let-7a-2-mir-125b-1 cluster host gene				0.434884	0.813905		-0.368428	-0.408801	-0.471561				263.557	32.0155	38.2939	-1.27917	3.27892	29.2605	0.000299403	0.00898814	3.37641e-06	3.85457e-06	0.2	0.464103	0.155482	-0.866025	-0.950066	0.0576689	0.0132936		12.4762	16.8257	6.29534	6.06642	5.72304
ENSG00000100991	TRPC4AP	PC	transient receptor potential cation channel subfamily C member 4 associated protein		GO:0006511 (ubiquitin-dependent protein catabolic process), GO:0016567 (protein ubiquitination), GO:0048820 (hair follicle maturation), GO:0070588 (calcium ion transmembrane transport), GO:0005886 (plasma membrane), GO:0031464 (Cul4A-RING E3 ubiquitin ligase complex), GO:0005262 (calcium channel activity), GO:0005515 (protein binding), GO:0019902 (phosphatase binding), R-HSA-2672351 (Homo sapiens…		-0.389039	-0.281583		0.216886	0.186976	0.26676				263.184	85.4055	91.2425	0.56997	6.65592	29.198	0.000301859	0.00901439	8.92449e-06	9.01484e-06	0.2	0.464103	0.0115731	0.866025	0.988664	0.0576689	0.00144644		74.9718	80.9237	115.147	112.744	119.268
ENSG00000141076	UTP4	PC	UTP4, small subunit processome component	This gene encodes a WD40-repeat-containing protein that is localized to the nucleolus. Mutation of this gene causes North American Indian childhood cirrhosis, a severe intrahepatic cholestasis that results in transient neonatal jaundice, and progresses to periportal fibrosis and cirrhosis in childhood and adolescence. [provided by RefSeq, Jul 2008].	hsa03008 (Ribosome biogenesis in eukaryotes), GO:0006351 (transcription, DNA-templated), GO:0006355 (regulation of transcription, DNA-templated), GO:0006364 (rRNA processing), GO:0030490 (maturation of SSU-rRNA), GO:0001650 (fibrillar center), GO:0005654 (nucleoplasm), GO:0005694 (chromosome), GO:0005730 (nucleolus), GO:0034455 (t-UTP complex), GO:0003723 (RNA binding), GO:0005515 (protein bindin…		0.481272	0.242088		-0.350194	-0.17278	-0.200386				263.165	88.6945	30.0076	-0.614769	7.03002	29.1948	0.000301985	0.00901439	4.25414e-06	4.30397e-06	0.2	0.464103	0.126879	-0.866025	-0.94371	0.0576689	0.0158959		178.559	150.974	99.4664	112.744	110.569
ENSG00000100401	RANGAP1	PC	Ran GTPase activating protein 1	This gene encodes a protein that associates with the nuclear pore complex and participates in the regulation of nuclear transport. The encoded protein interacts with Ras-related nuclear protein 1 (RAN) and regulates guanosine triphosphate (GTP)-binding and exchange. Alternative splicing results in multiple transcript variants. [provided by RefSeq, Jul 2013].	hsa03013 (RNA transport), GO:0007062 (sister chromatid cohesion), GO:0007165 (signal transduction), GO:0016925 (protein sumoylation), GO:0043547 (positive regulation of GTPase activity), GO:0046826 (negative regulation of protein export from nucleus), GO:0048678 (response to axon injury), GO:1904117 (NA), GO:0000776 (kinetochore), GO:0000777 (condensed chromosome kinetochore), GO:0000922 (spindle…		-0.426184	-0.24957		0.185755	0.313353	0.176646				262.921	93.3631	71.6161	0.567456	7.71465	29.154	0.000303603	0.00901439	6.17273e-06	6.324e-06	0.2	0.464103	0.0218223	0.866025	0.965039	0.0576689	0.00780581		152.691	172.836	234.416	256.278	232.928
ENSG00000188739	RBM34	PC	RNA binding motif protein 34		GO:0005634 (nucleus), GO:0005730 (nucleolus), GO:0003723 (RNA binding)		0.301662	0.364973		-0.221303	-0.236887	-0.208444				262.728	80.4341	16.0343	-0.570552	6.21188	29.1217	0.000304892	0.00901439	1.09182e-05	1.12649e-05	0.2	0.464103	0.0379559	-0.866025	-0.995737	0.0576689	0.000333938		89.8517	93.9723	61.9233	61.2365	62.4956
ENSG00000147274	RBMX	PC	RNA binding motif protein X-linked	This gene belongs to the RBMY gene family which includes candidate Y chromosome spermatogenesis genes. This gene, an active X chromosome homolog of the Y chromosome RBMY gene, is widely expressed whereas the RBMY gene evolved a male-specific function in spermatogenesis. Pseudogenes of this gene, found on chromosomes 1, 4, 9, 11, and 6, were likely derived by retrotransposition from the original g…	hsa03040 (Spliceosome), GO:0000381 (regulation of alternative mRNA splicing, via spliceosome), GO:0000398 (mRNA splicing, via spliceosome), GO:0001649 (osteoblast differentiation), GO:0006366 (transcription from RNA polymerase II promoter), GO:0006376 (mRNA splice site selection), GO:0006509 (membrane protein ectodomain proteolysis), GO:0010467 (gene expression), GO:0045944 (positive regulation o…		0.4979	0.212906		-0.308057	-0.202599	-0.200151				262.712	90.8395	59.8553	-0.605976	7.29457	29.1191	0.000304996	0.00901439	4.29876e-06	4.33298e-06	0.2	0.464103	0.171713	-0.866025	-0.931971	0.0576689	0.0210812		217.018	177.758	123.274	132.774	133.003
ENSG00000143753	DEGS1	PC	delta 4-desaturase, sphingolipid 1	This gene encodes a member of the membrane fatty acid desaturase family which is responsible for inserting double bonds into specific positions in fatty acids. This protein contains three His-containing consensus motifs that are characteristic of a group of membrane fatty acid desaturases. It is predicted to be a multiple membrane-spanning protein localized to the endoplasmic reticulum. Overexpre…	hsa00600 (Sphingolipid metabolism), hsa01100 (Metabolic pathways), hsa04071 (Sphingolipid signaling pathway), GO:0006636 (unsaturated fatty acid biosynthetic process), GO:0030148 (sphingolipid biosynthetic process), GO:0043312 (neutrophil degranulation), GO:0046513 (ceramide biosynthetic process), GO:0055114 (oxidation-reduction process), GO:0005739 (mitochondrion), GO:0005783 (endoplasmic reticu…		-0.590401	-0.288302		0.415286	0.323943	0.139473				262.705	81.2752	28.4008	0.749356	6.28147	29.1179	0.000305044	0.00901439	2.55409e-06	2.57335e-06	0.2	0.464103	0.0285258	0.866025	0.936933	0.0576689	0.0188317		49.1037	61.0076	100.611	94.3156	82.7551
ENSG00000132842	AP3B1	PC	adaptor related protein complex 3 subunit beta 1	This gene encodes a protein that may play a role in organelle biogenesis associated with melanosomes, platelet dense granules, and lysosomes. The encoded protein is part of the heterotetrameric AP-3 protein complex which interacts with the scaffolding protein clathrin. Mutations in this gene are associated with Hermansky-Pudlak syndrome type 2. Two transcript variants encoding different isoforms …	hsa04142 (Lysosome), GO:0006622 (protein targeting to lysosome), GO:0006886 (intracellular protein transport), GO:0007596 (blood coagulation), GO:0008089 (anterograde axon cargo transport), GO:0032438 (melanosome organization), GO:0048007 (antigen processing and presentation, exogenous lipid antigen via MHC class Ib), GO:0048490 (anterograde synaptic vesicle transport), GO:0051138 (positive regul…		0.449115	0.582344		-0.222648	-0.633706	-0.175104				262.624	67.6901	65.7777	-0.889057	5.32496	29.1044	0.000305585	0.00901439	1.95072e-06	2.02468e-06	0.2	0.464103	0.009085	-0.866025	-0.957991	0.0576689	0.0102704		52.423	57.6882	32.1635	23.6934	33.3081
ENSG00000100883	SRP54	PC	signal recognition particle 54		hsa03060 (Protein export), GO:0006614 (SRP-dependent cotranslational protein targeting to membrane), GO:0006616 (SRP-dependent cotranslational protein targeting to membrane, translocation), GO:0006617 (SRP-dependent cotranslational protein targeting to membrane, signal sequence recognition), GO:0042493 (response to drug), GO:0045047 (protein targeting to ER), GO:0005634 (nucleus), GO:0005737 (cyt…		0.483153	0.292024		-0.225235	-0.408139	-0.141803				262.164	82.4781	23.3532	-0.66007	6.38665	29.0275	0.000308687	0.00908334	4.06318e-06	4.15138e-06	0.2	0.464103	0.0645006	-0.866025	-0.952907	0.0576689	0.0121806		114.232	99.8098	69.1343	60.6642	73.3693
ENSG00000123124	WWP1	PC	WW domain containing E3 ubiquitin protein ligase 1	WW domain-containing proteins are found in all eukaryotes and play an important role in the regulation of a wide variety of cellular functions such as protein degradation, transcription, and RNA splicing. This gene encodes a protein which contains 4 tandem WW domains and a HECT (homologous to the E6-associated protein carboxyl terminus) domain. The encoded protein belongs to a family of NEDD4-lik…	hsa04120 (Ubiquitin mediated proteolysis), hsa04144 (Endocytosis), GO:0007165 (signal transduction), GO:0007417 (central nervous system development), GO:0016567 (protein ubiquitination), GO:0034220 (ion transmembrane transport), GO:0043161 (proteasome-mediated ubiquitin-dependent protein catabolic process), GO:0045892 (negative regulation of transcription, DNA-templated), GO:0046718 (viral entry …		0.385649	0.573228		-0.337046	-0.275822	-0.346009				261.847	53.8442	47.1608	-0.87301	4.49204	28.9745	0.000310848	0.00911373	8.82576e-06	9.39121e-06	0.2	0.464103	0.0911751	-0.866025	-0.980211	0.0576689	0.00333187		28.5007	32.7358	16.4823	17.2836	16.3679
ENSG00000213977	TAX1BP3	PC	Tax1 binding protein 3		GO:0007266 (Rho protein signal transduction), GO:0008285 (negative regulation of cell proliferation), GO:0016055 (Wnt signaling pathway), GO:0030178 (negative regulation of Wnt signaling pathway), GO:0090630 (NA), GO:2000009 (negative regulation of protein localization to cell surface), GO:0001650 (fibrillar center), GO:0005737 (cytoplasm), GO:0005829 (cytosol), GO:0005886 (plasma membrane), GO:0…		-0.475225	-0.587469		0.641492	0.249756	0.171446				261.788	66.7312	44.393	0.952774	5.2661	28.9646	0.000311253	0.00911373	2.45476e-06	2.78668e-06	0.2	0.464103	0.0429239	0.866025	0.891451	0.0576689	0.0422252		25.5247	23.4644	57.6882	43.4951	41.0914
ENSG00000265817	FSBP	PC	fibrinogen silencer binding protein		GO:0006351 (transcription, DNA-templated), GO:0006355 (regulation of transcription, DNA-templated), GO:0005634 (nucleus), GO:0005515 (protein binding), GO:0042802 (identical protein binding)		0.6182	0.568442		-0.417713	-0.633669	-0.13526				261.562	49.8906	71.0608	-1.07729	4.27038	28.9269	0.0003128	0.00912223	2.87212e-06	3.09042e-06	0.2	0.464103	0.0063555	-0.866025	-0.97286	0.0576689	0.00534536		28.3863	27.3561	12.8196	10.7593	16.0245
ENSG00000180900	SCRIB	PC	scribbled planar cell polarity protein	This gene encodes a protein that was identified as being similar to the Drosophila scribble protein. The mammalian protein is involved in tumor suppression pathways. As a scaffold protein involved in cell polarization processes, this protein binds to many other proteins. The encoded protein binds to papillomavirus E6 protein via its PDZ domain and the C-terminus of E6. Two alternatively spliced t…	hsa04390 (Hippo signaling pathway), hsa04530 (Tight junction), hsa05165 (Human papillomavirus infection), hsa05203 (Viral carcinogenesis), GO:0001843 (neural tube closure), GO:0001921 (positive regulation of receptor recycling), GO:0007268 (synaptic transmission), GO:0008105 (asymmetric protein localization), GO:0008283 (cell proliferation), GO:0016032 (viral process), GO:0016080 (synaptic vesicl…		-0.517876	-0.238232		0.212651	0.285717	0.25774				261.522	85.7251	85.0257	0.636572	6.69151	28.9202	0.000313078	0.00912223	4.8009e-06	4.86315e-06	0.2	0.464103	0.09786	0.866025	0.970378	0.0576689	0.00609291		69.7066	85.0443	116.979	123.16	120.756
ENSG00000129911	KLF16	PC	Kruppel like factor 16		GO:0000122 (negative regulation of transcription from RNA polymerase II promoter), GO:0006351 (transcription, DNA-templated), GO:0007212 (dopamine receptor signaling pathway), GO:0005634 (nucleus), GO:0000978 (RNA polymerase II core promoter proximal region sequence-specific DNA binding), GO:0001078 (RNA polymerase II core promoter proximal region sequence-specific DNA binding transcription facto…		-0.541278	-0.482969		0.505205	0.231059	0.287983				261.349	54.9125	48.7339	0.941288	4.55522	28.8913	0.000314273	0.00913466	7.21156e-06	8.36187e-06	0.2	0.464103	0.0145426	0.866025	0.958628	0.0576689	0.0100386		14.651	15.3377	32.3924	26.4404	27.585
ENSG00000112335	SNX3	PC	sorting nexin 3	This gene encodes a member of the sorting nexin family. Members of this family contain a phox (PX) domain, which is a phosphoinositide binding domain, and are involved in intracellular trafficking. This protein does not contain a coiled coil region, like most family members. This protein interacts with phosphatidylinositol-3-phosphate, and is involved in protein trafficking. A pseudogene of this …	hsa04144 (Endocytosis), GO:0009617 (response to bacterium), GO:0010324 (membrane invagination), GO:0010976 (positive regulation of neuron projection development), GO:0015031 (protein transport), GO:0016055 (Wnt signaling pathway), GO:0016579 (protein deubiquitination), GO:0022615 (protein to membrane docking), GO:0030111 (regulation of Wnt signaling pathway), GO:0042177 (negative regulation of pr…		0.164223	0.940707		-0.346655	-0.344308	-0.413967				260.88	92.5892	42.8367	-0.982283	7.57041	28.8131	0.000317538	0.00920705	5.29265e-07	5.30368e-07	0.2	0.464103	0.313048	-0.866025	-0.82191	0.0576689	0.0877686		198.36	341.207	138.612	138.841	132.202
ENSG00000005801	ZNF195	PC	zinc finger protein 195	This gene encodes a protein belonging to the Krueppel C2H2-type zinc-finger protein family. These family members are transcription factors that are implicated in a variety of cellular processes. This gene is located near the centromeric border of chromosome 11p15.5, next to an imprinted domain that is associated with maternal-specific loss of heterozygosity in Wilms_ tumors. Alternative splicing …	GO:0006351 (transcription, DNA-templated), GO:0006355 (regulation of transcription, DNA-templated), GO:0005634 (nucleus), GO:0003677 (DNA binding), GO:0008270 (zinc ion binding), R-HSA-212436 (Homo sapiens: Generic Transcription Pathway), R-HSA-74160 (Homo sapiens: Gene Expression)		0.498193	0.350843		-0.401202	-0.236754	-0.21108				260.23	65.8563	29.9234	-0.744839	5.20831	28.7047	0.000322124	0.00931731	7.77311e-06	8.08642e-06	0.2	0.464103	0.0424041	-0.866025	-0.97619	0.0576689	0.00439443		51.0495	45.8988	26.4404	29.8743	30.4466
ENSG00000116062	MSH6	PC	mutS homolog 6	This gene encodes a member of the DNA mismatch repair MutS family. In E. coli, the MutS protein helps in the recognition of mismatched nucleotides prior to their repair. A highly conserved region of approximately 150 aa, called the Walker-A adenine nucleotide binding motif, exists in MutS homologs. The encoded protein heterodimerizes with MSH2 to form a mismatch recognition complex that functions…	hsa01524 (Platinum drug resistance), hsa03430 (Mismatch repair), hsa05200 (Pathways in cancer), hsa05210 (Colorectal cancer), GO:0000710 (meiotic mismatch repair), GO:0006281 (DNA repair), GO:0006298 (mismatch repair), GO:0008340 (determination of adult lifespan), GO:0008630 (intrinsic apoptotic signaling pathway in response to DNA damage), GO:0009411 (response to UV), GO:0016032 (viral process),…		0.638179	0.254983		-0.429819	-0.132054	-0.331289				260.003	82.1921	84.6387	-0.769701	6.36036	28.667	0.000323743	0.0093414	2.20831e-06	2.24338e-06	0.2	0.464103	0.179265	-0.866025	-0.906542	0.0576689	0.0338125		123.618	94.3156	57.9171	71.6524	62.1522
ENSG00000101557	USP14	PC	ubiquitin specific peptidase 14	This gene encodes a member of the ubiquitin-specific processing (UBP) family of proteases that is a deubiquitinating enzyme (DUB) with His and Cys domains. This protein is located in the cytoplasm and cleaves the ubiquitin moiety from ubiquitin-fused precursors and ubiquitinylated proteins. Mice with a mutation that results in reduced expression of the ortholog of this protein are retarded for gr…	GO:0006511 (ubiquitin-dependent protein catabolic process), GO:0007268 (synaptic transmission), GO:0010951 (negative regulation of endopeptidase activity), GO:0016579 (protein deubiquitination), GO:0050920 (regulation of chemotaxis), GO:0061136 (regulation of proteasomal protein catabolic process), GO:1903070 (negative regulation of ER-associated ubiquitin-dependent protein catabolic process), GO…		0.644893	0.497465		-0.184253	-0.527636	-0.43047				259.879	44.709	67.1322	-1.06866	3.97936	28.6464	0.000324629	0.00934429	5.03969e-06	5.48776e-06	0.2	0.464103	0.0153141	-0.866025	-0.976266	0.0576689	0.00437368		23.9223	21.4042	12.5907	9.50024	10.3015
ENSG00000139168	ZCRB1	PC	zinc finger CCHC-type and RNA binding motif containing 1	Pre-mRNA splicing is catalyzed by the spliceosome. U12-type spliceosome binds U12-type pre-mRNAs and recognizes the 5_ splice site and branch-point sequence. U11 and U12 snRNPs are components of U12-type spliceosome and function as a molecular bridge connecting both ends of the intron. The protein encoded by this gene contains a RNA recognition motif. It was identified as one of the protein compo…	GO:0000398 (mRNA splicing, via spliceosome), GO:0008380 (RNA splicing), GO:0005654 (nucleoplasm), GO:0005689 (U12-type spliceosomal complex), GO:0003723 (RNA binding), GO:0008270 (zinc ion binding), R-HSA-72165 (Homo sapiens: mRNA Splicing - Minor Pathway), R-HSA-72172 (Homo sapiens: mRNA Splicing), R-HSA-72203 (Homo sapiens: Processing of Capped Intron-Containing Pre-mRNA), R-HSA-74160 (Homo sap…		0.490869	0.203965		-0.206056	-0.292974	-0.195805				259.612	92.505	15.9334	-0.591616	7.55152	28.602	0.000326548	0.00937681	5.34847e-06	5.37396e-06	0.2	0.464103	0.177779	-0.866025	-0.930068	0.0576689	0.0219656		258.223	211.295	158.528	149.142	159.673
ENSG00000067082	KLF6	PC	Kruppel like factor 6	This gene encodes a member of the Kruppel-like family of transcription factors. The zinc finger protein is a transcriptional activator, and functions as a tumor suppressor. Multiple transcript variants encoding different isoforms have been found for this gene, some of which are implicated in carcinogenesis. [provided by RefSeq, May 2009].	GO:0006366 (transcription from RNA polymerase II promoter), GO:0030183 (B cell differentiation), GO:0045893 (positive regulation of transcription, DNA-templated), GO:0045944 (positive regulation of transcription from RNA polymerase II promoter), GO:0001650 (fibrillar center), GO:0005634 (nucleus), GO:0005730 (nucleolus), GO:0005829 (cytosol), GO:0043231 (intracellular membrane-bounded organelle),…		-0.737431	-0.546512		0.534536	0.340982	0.408426				259.182	27.9862	73.6855	1.39657	3.05084	28.5304	0.000329674	0.00943159	3.26457e-06	4.36764e-06	0.2	0.464103	0.00204295	0.866025	0.983056	0.0576689	0.00264097		3.66274	4.46397	11.675	9.95808	10.5304
ENSG00000064607	SUGP2	PC	SURP and G-patch domain containing 2	This gene encodes a member of the arginine/serine-rich family of splicing factors. The encoded protein functions in mRNA processing. Alternatively spliced transcript variants have been described. [provided by RefSeq, Feb 2009].	GO:0006397 (mRNA processing), GO:0008380 (RNA splicing), GO:0005654 (nucleoplasm), GO:0016604 (nuclear body), GO:0003723 (RNA binding)		-0.283639	-0.403939		0.250103	0.256873	0.180602				259.131	82.0996	87.011	0.58705	6.35109	28.5221	0.000330042	0.00943159	1.09994e-05	1.10767e-05	0.2	0.464103	0.0155148	0.866025	0.98758	0.0576689	0.00165837		65.2426	59.863	95.3458	95.8036	90.7674
ENSG00000085231	AK6	PC	adenylate kinase 6	Initiation of transcription by RNA polymerase II requires the activities of more than 70 polypeptides. The protein that coordinates these activities is transcription factor IID (TFIID), which binds to the core promoter to position the polymerase properly, serves as the scaffold for assembly of the remainder of the transcription complex, and acts as a channel for regulatory signals. TFIID is compo…	hsa00230 (Purine metabolism), hsa01100 (Metabolic pathways), hsa03008 (Ribosome biogenesis in eukaryotes), GO:0015949 (nucleobase-containing small molecule interconversion), GO:0046939 (nucleotide phosphorylation), GO:0046940 (nucleoside monophosphate phosphorylation), GO:0005654 (nucleoplasm), GO:0005737 (cytoplasm), GO:0005829 (cytosol), GO:0015030 (Cajal body), GO:0016020 (membrane), GO:000401…		0.341743	0.428946		-0.28198	-0.300567	-0.188142				258.678	69.2631	19.4246	-0.671637	5.41982	28.4468	0.000333371	0.00950387	1.20739e-05	1.26357e-05	0.2	0.464103	0.0198334	-0.866025	-0.989545	0.0576689	0.00128121		53.1098	56.5436	33.7659	33.3081	36.1696
ENSG00000140320	BAHD1	PC	bromo adjacent homology domain containing 1		GO:0006342 (chromatin silencing), GO:0006351 (transcription, DNA-templated), GO:0016569 (covalent chromatin modification), GO:0031507 (heterochromatin assembly), GO:0045892 (negative regulation of transcription, DNA-templated), GO:0000785 (chromatin), GO:0005654 (nucleoplasm), GO:0005677 (chromatin silencing complex), GO:0000976 (transcription regulatory region sequence-specific DNA binding), GO:…		-0.363753	-0.563676		0.459199	0.154858	0.313372				258.472	67.3873	93.6906	0.818211	5.30505	28.4126	0.000334897	0.00952455	5.51242e-06	6.17006e-06	0.2	0.464103	0.0108111	0.866025	0.943867	0.0576689	0.0158295		28.9586	24.9524	52.7664	42.3505	47.5012
ENSG00000223374	AC005104.1	antisense					-1.00016	-0.350293		0.563496	0.312968	0.47399				258.06	57.4781	2.86027	1.19374	4.70074	28.3442	0.000337975	0.00958913	1.33422e-06	1.58441e-06	0.2	0.464103	0.0751708	0.866025	0.949893	0.0576689	0.0133626		10.8738	18.1993	36.0551	29.9887	33.7659
ENSG00000140941	MAP1LC3B	PC	microtubule associated protein 1 light chain 3 beta	The product of this gene is a subunit of neuronal microtubule-associated MAP1A and MAP1B proteins, which are involved in microtubule assembly and important for neurogenesis. Studies on the rat homolog implicate a role for this gene in autophagy, a process that involves the bulk degradation of cytoplasmic component. [provided by RefSeq, Jul 2008]. Publication Note: This RefSeq record includes a su…	hsa04216 (Ferroptosis), GO:0000422 (mitochondrion degradation), GO:0006914 (autophagy), GO:0016236 (macroautophagy), GO:0061024 (membrane organization), GO:0097352 (autophagic vacuole maturation), GO:0000421 (autophagic vacuole membrane), GO:0005622 (intracellular), GO:0005739 (mitochondrion), GO:0005776 (autophagic vacuole), GO:0005829 (cytosol), GO:0005874 (microtubule), GO:0005930 (axoneme), G…		0.428626	0.283712		-0.26951	-0.263133	-0.179694				257.715	76.9515	29.8561	-0.613752	5.95134	28.287	0.000340575	0.00963856	1.15152e-05	1.19127e-05	0.2	0.464103	0.0764392	-0.866025	-0.978404	0.0576689	0.00379747		81.8394	73.8272	49.676	49.9049	52.9953
ENSG00000090971	NAT14	PC	N-acetyltransferase 14 (putative)		GO:0006352 (DNA-templated transcription, initiation), GO:0045893 (positive regulation of transcription, DNA-templated), GO:0005634 (nucleus), GO:0016021 (integral component of membrane), GO:0003677 (DNA binding), GO:0008080 (N-acetyltransferase activity)		-0.383233	-0.341242		0.384207	0.187877	0.152391				257.614	83.7988	15.2351	0.621463	6.51172	28.2703	0.000341339	0.00963856	8.01995e-06	8.11259e-06	0.2	0.464103	0.0186033	0.866025	0.94845	0.0576689	0.0139408		67.7608	69.821	116.75	101.641	99.123
ENSG00000105393	BABAM1	PC	BRISC and BRCA1 A complex member 1		hsa03440 (Homologous recombination), GO:0006302 (double-strand break repair), GO:0006303 (double-strand break repair via nonhomologous end joining), GO:0007067 (mitotic nuclear division), GO:0010212 (response to ionizing radiation), GO:0016569 (covalent chromatin modification), GO:0016579 (protein deubiquitination), GO:0031572 (G2 DNA damage checkpoint), GO:0045739 (positive regulation of DNA rep…		-0.370595	-0.422931		0.461147	0.266492	0.0658869				257.437	90.4862	16.7073	0.679543	7.24905	28.241	0.000342686	0.00965366	3.69845e-06	3.79957e-06	0.2	0.464103	0.0397824	0.866025	0.902894	0.0576689	0.0357912		113.66	109.539	203.855	177.872	154.522
ENSG00000273345	AC104109.4	processed_transcript					0.391914	0.701859		-0.69784	-0.268903	-0.127031				257.165	76.9768	48.5068	-0.929106	5.95188	28.196	0.000344761	0.00968917	1.32276e-06	1.34414e-06	0.2	0.464103	0.0843944	-0.866025	-0.923053	0.0576689	0.0253245		76.8031	95.6892	35.025	47.8446	52.9953
ENSG00000204977	TRIM13	PC	tripartite motif containing 13	This gene encodes a member of the tripartite motif (TRIM) family. The TRIM motif includes three zinc-binding domains, a RING, a B-box type 1 and a B-box type 2, and a coiled-coil region. This gene is located on chromosome 13 within the minimal deletion region for B-cell chronic lymphocytic leukemia. Multiple alternatively spliced transcript variants have been found for this gene. [provided by Ref…	GO:0007165 (signal transduction), GO:0009653 (anatomical structure morphogenesis), GO:0010332 (response to gamma radiation), GO:0010942 (positive regulation of cell death), GO:0016239 (positive regulation of macroautophagy), GO:0030433 (ER-associated ubiquitin-dependent protein catabolic process), GO:0032897 (negative regulation of viral transcription), GO:0043123 (positive regulation of I-kappaB…		0.403099	0.647109		-0.467345	-0.407833	-0.17503				256.785	53.0619	72.1881	-0.955026	4.45337	28.1331	0.000347695	0.00974858	6.62955e-06	7.05679e-06	0.2	0.464103	0.0793569	-0.866025	-0.959491	0.0576689	0.00972752		27.814	33.3081	14.3076	14.9944	17.9703
ENSG00000076053	RBM7	PC	RNA binding motif protein 7		GO:0000381 (regulation of alternative mRNA splicing, via spliceosome), GO:0051321 (meiotic cell cycle), GO:0005634 (nucleus), GO:0005654 (nucleoplasm), GO:0003723 (RNA binding), GO:0003727 (single-stranded RNA binding), GO:0005515 (protein binding)		0.601319	0.623181		-0.616448	-0.153016	-0.455036				256.615	41.7564	81.2484	-1.15478	3.81309	28.105	0.000349013	0.00976251	3.97292e-06	4.37154e-06	0.2	0.464103	0.00771572	-0.866025	-0.978	0.0576689	0.00390414		20.4885	20.8319	7.66887	11.3316	8.81348
ENSG00000198898	CAPZA2	PC	capping actin protein of muscle Z-line subunit alpha 2	The protein encoded by this gene is a member of the F-actin capping protein alpha subunit family. It is the alpha subunit of the barbed-end actin binding protein Cap Z. By capping the barbed end of actin filaments, Cap Z regulates the growth of the actin filaments at the barbed end. [provided by RefSeq, Jul 2008].	hsa04144 (Endocytosis), GO:0006461 (protein complex assembly), GO:0006928 (cellular component movement), GO:0007596 (blood coagulation), GO:0045087 (innate immune response), GO:0051016 (barbed-end actin filament capping), GO:0005576 (extracellular region), GO:0005829 (cytosol), GO:0005903 (brush border), GO:0008290 (F-actin capping protein complex), GO:0015629 (actin cytoskeleton), GO:0016020 (me…		0.29666	0.64593		-0.418589	-0.283221	-0.240781				256.388	62.5925	18.2636	-0.843084	5.01145	28.0674	0.000350784	0.00978847	6.47663e-06	6.76315e-06	0.2	0.464103	0.167408	-0.866025	-0.933552	0.0576689	0.0203553		38.1154	49.1037	22.4343	24.838	25.6392
ENSG00000225648	SBDSP1	transcribed_u_Pg	SBDS, ribosome maturation factor pseudogene 1				0.729362	0.482673		-0.76027	-0.20461	-0.247155				256.285	58.7315	12.459	-1.06773	4.7762	28.0505	0.000351588	0.00978847	2.13275e-06	2.24973e-06	0.2	0.464103	0.0431661	-0.866025	-0.946326	0.0576689	0.0148064		43.1517	36.0551	14.0787	21.6331	20.9463
ENSG00000137776	SLTM	PC	SAFB like transcription modulator		GO:0006351 (transcription, DNA-templated), GO:0006357 (regulation of transcription from RNA polymerase II promoter), GO:0006915 (apoptotic process), GO:0050684 (regulation of mRNA processing), GO:0005634 (nucleus), GO:0005654 (nucleoplasm), GO:0016604 (nuclear body), GO:0003690 (double-stranded DNA binding), GO:0003723 (RNA binding), GO:0043565 (sequence-specific DNA binding)		0.460005	0.940157		-0.174971	-0.573315	-0.651877				255.949	38.2655	32.7753	-1.37136	3.62514	27.995	0.000354232	0.00983904	2.49823e-06	2.78923e-06	0.2	0.464103	0.161195	-0.866025	-0.9195	0.0576689	0.0270842		15.6811	22.6632	9.38578	6.63872	6.18088
ENSG00000163754	GYG1	PC	glycogenin 1	This gene encodes a member of the glycogenin family. Glycogenin is a glycosyltransferase that catalyzes the formation of a short glucose polymer from uridine diphosphate glucose in an autoglucosylation reaction. This reaction is followed by elongation and branching of the polymer, catalyzed by glycogen synthase and branching enzyme, to form glycogen. This gene is expressed in muscle and other tis…	hsa00500 (Starch and sucrose metabolism), hsa01100 (Metabolic pathways), GO:0005978 (glycogen biosynthetic process), GO:0005980 (glycogen catabolic process), GO:0043312 (neutrophil degranulation), GO:0005576 (extracellular region), GO:0005829 (cytosol), GO:0016020 (membrane), GO:0034774 (secretory granule lumen), GO:0043202 (lysosomal lumen), GO:0070062 (extracellular vesicular exosome), GO:19048…		0.253736	0.431344		-0.284751	-0.260554	-0.139775				255.815	85.1699	21.0482	-0.583545	6.63248	27.9729	0.000355292	0.00984547	9.50557e-06	9.69028e-06	0.2	0.464103	0.0892941	-0.866025	-0.96239	0.0576689	0.0087061		115.949	131.401	79.2068	80.5804	87.7914
ENSG00000173083	HPSE	PC	heparanase	Heparan sulfate proteoglycans are major components of the basement membrane and extracellular matrix. The protein encoded by this gene is an enzyme that cleaves heparan sulfate proteoglycans to permit cell movement through remodeling of the extracellular matrix. In addition, this cleavage can release bioactive molecules from the extracellular matrix. Several transcript variants encoding different…	hsa00531 (Glycosaminoglycan degradation), hsa01100 (Metabolic pathways), hsa05205 (Proteoglycans in cancer), GO:0006027 (glycosaminoglycan catabolic process), GO:0006029 (proteoglycan metabolic process), GO:0007160 (cell-matrix adhesion), GO:0010575 (positive regulation vascular endothelial growth factor production), GO:0030194 (positive regulation of blood coagulation), GO:0030200 (heparan sulfa…		0.570431	0.632504		-0.556876	-0.342666	-0.303393				255.61	31.3257	82.2663	-1.21911	3.23399	27.9391	0.000356922	0.00986618	4.89677e-06	5.60328e-06	0.2	0.464103	0.000763375	-0.866025	-0.991468	0.0576689	0.00094479		13.6208	14.3076	5.15073	6.29534	6.52426
ENSG00000139329	LUM	PC	lumican	This gene encodes a member of the small leucine-rich proteoglycan (SLRP) family that includes decorin, biglycan, fibromodulin, keratocan, epiphycan, and osteoglycin. In these bifunctional molecules, the protein moiety binds collagen fibrils and the highly charged hydrophilic glycosaminoglycans regulate interfibrillar spacings. Lumican is the major keratan sulfate proteoglycan of the cornea but is…	hsa05205 (Proteoglycans in cancer), GO:0007601 (visual perception), GO:0014070 (response to organic cyclic compound), GO:0018146 (keratan sulfate biosynthetic process), GO:0030198 (extracellular matrix organization), GO:0030199 (collagen fibril organization), GO:0032914 (positive regulation of transforming growth factor beta1 production), GO:0042340 (keratan sulfate catabolic process), GO:0045944…		0.535644	0.578222		-0.378278	-0.122004	-0.613584				255.415	54.7106	58.2737	-0.993536	4.54252	27.9068	0.000358485	0.00986618	4.38501e-06	4.65625e-06	0.2	0.464103	0.00835744	-0.866025	-0.969699	0.0576689	0.00630285		32.3924	33.4225	16.2534	19.8017	13.5064
ENSG00000047849	MAP4	PC	microtubule associated protein 4	The protein encoded by this gene is a major non-neuronal microtubule-associated protein. This protein contains a domain similar to the microtubule-binding domains of neuronal microtubule-associated protein (MAP2) and microtubule-associated protein tau (MAPT/TAU). This protein promotes microtubule assembly, and has been shown to counteract destabilization of interphase microtubule catastrophe prom…	GO:0007052 (mitotic spindle organization), GO:0031175 (neuron projection development), GO:0051012 (microtubule sliding), GO:0051294 (establishment of spindle orientation), GO:0051301 (cell division), GO:1902856 (negative regulation of nonmotile primary cilium assembly), GO:0005737 (cytoplasm), GO:0005874 (microtubule), GO:0005875 (microtubule associated complex), GO:0005930 (axoneme), GO:0014069 …		-0.25229	-0.383816		0.291663	0.16968	0.174763				255.409	93.0855	84.9752	0.535189	7.66848	27.9059	0.000358529	0.00986618	1.19668e-05	1.22498e-05	0.2	0.464103	0.0103679	0.866025	0.971729	0.0576689	0.00568196		167.456	152.691	245.06	225.03	225.831
ENSG00000102710	SUPT20H	PC	SPT20 homolog, SAGA complex component		hsa04140 (Autophagy - animal), GO:0006914 (autophagy), GO:0007369 (gastrulation), GO:1903506 (regulation of nucleic acid-templated transcription), GO:0000124 (SAGA complex), GO:0001650 (fibrillar center), GO:0070461 (SAGA-type complex), GO:0003712 (transcription cofactor activity), GO:0005515 (protein binding), R-HSA-3214847 (Homo sapiens: HATs acetylate histones), R-HSA-3247509 (Homo sapiens: Ch…		0.464167	0.429814		-0.529389	-0.163902	-0.20069				255.304	70.5922	62.9175	-0.767845	5.51534	27.8885	0.000359376	0.00986666	5.03311e-06	5.20931e-06	0.2	0.464103	0.00971267	-0.866025	-0.967314	0.0576689	0.00705887		61.2365	59.7485	29.7598	38.9166	37.8865
ENSG00000070756	PABPC1	PC	poly(A) binding protein cytoplasmic 1	This gene encodes a poly(A) binding protein. The protein shuttles between the nucleus and cytoplasm and binds to the 3_ poly(A) tail of eukaryotic messenger RNAs via RNA-recognition motifs. The binding of this protein to poly(A) promotes ribosome recruitment and translation initiation; it is also required for poly(A) shortening which is the first step in mRNA decay. The gene is part of a small ge…	hsa03013 (RNA transport), hsa03015 (mRNA surveillance pathway), hsa03018 (RNA degradation), GO:0000184 (nuclear-transcribed mRNA catabolic process, nonsense-mediated decay), GO:0000289 (nuclear-transcribed mRNA poly(A) tail shortening), GO:0000398 (mRNA splicing, via spliceosome), GO:0006378 (mRNA polyadenylation), GO:0006413 (translational initiation), GO:0031047 (gene silencing by RNA), GO:0043…		0.273209	0.296118		-0.16709	-0.221625	-0.180611				255.074	99.5542	21.2838	-0.474818	10.8019	27.8506	0.000361228	0.00989464	2.76572e-05	2.73572e-05	0.2	0.464103	0.000287466	-0.866025	-0.99723	0.0576689	0.000174971		2129.08	2163.19	1568.57	1510.31	1553.92
ENSG00000162616	DNAJB4	PC	DnaJ heat shock protein family (Hsp40) member B4	DNAJB4 belongs to the evolutionarily conserved DNAJ/HSP40 protein family. For background information on the DNAJ family, see MIM 608375.[supplied by OMIM, Mar 2008]. Publication Note: This RefSeq record includes a subset of the publications that are available for this gene. Please see the Gene record to access additional publications.	GO:0006457 (protein folding), GO:0006986 (response to unfolded protein), GO:0009408 (response to heat), GO:0032781 (positive regulation of ATPase activity), GO:0005829 (cytosol), GO:0005886 (plasma membrane), GO:0070062 (extracellular vesicular exosome), GO:0001671 (ATPase activator activity), GO:0005515 (protein binding), GO:0051082 (unfolded protein binding), GO:0051087 (chaperone binding)		0.316919	0.418452		-0.306201	-0.325888	-0.103282				254.907	80.1228	33.524	-0.626556	6.19124	27.823	0.000362581	0.00990888	8.7996e-06	9.03662e-06	0.2	0.464103	0.00946551	-0.866025	-0.969807	0.0576689	0.00626916		89.0504	95.6892	57.1159	56.3147	66.0438
ENSG00000140262	TCF12	PC	transcription factor 12	The protein encoded by this gene is a member of the basic helix-loop-helix (bHLH) E-protein family that recognizes the consensus binding site (E-box) CANNTG. This encoded protein is expressed in many tissues, among them skeletal muscle, thymus, B- and T-cells, and may participate in regulating lineage-specific gene expression through the formation of heterodimers with other bHLH E-proteins. Sever…	GO:0006357 (regulation of transcription from RNA polymerase II promoter), GO:0006366 (transcription from RNA polymerase II promoter), GO:0006955 (immune response), GO:0007517 (muscle organ development), GO:0045666 (positive regulation of neuron differentiation), GO:0045944 (positive regulation of transcription from RNA polymerase II promoter), GO:0000790 (nuclear chromatin), GO:0005634 (nucleus),…		0.392405	0.583612		-0.498134	-0.267731	-0.210152				254.795	57.9408	58.1896	-0.872468	4.72592	27.8046	0.000363488	0.00991089	7.75298e-06	8.17185e-06	0.2	0.464103	0.0503298	-0.866025	-0.966584	0.0576689	0.00729586		33.537	38.5733	17.1691	20.4885	21.4042
ENSG00000274012	RN7SL2	misc_RNA	RNA, 7SL, cytoplasmic 2				-0.736804	-1.19367		0.0676127	0.816044	1.04682				254.199	14.7544	1.31236	2.94245	2.28571	27.7064	0.00036838	0.0100213	1.49953e-07	2.87018e-07	0.2	0.464103	0.058811	0.866025	0.851039	0.0576689	0.0674519		1.37353	0.457843	3.89166	7.89779	9.6147
ENSG00000108599	AKAP10	PC	A-kinase anchoring protein 10	This gene encodes a member of the A-kinase anchor protein family. A-kinase anchor proteins bind to the regulatory subunits of protein kinase A (PKA) and confine the holoenzyme to discrete locations within the cell. The encoded protein is localized to mitochondria and interacts with both the type I and type II regulatory subunits of PKA. Polymorphisms in this gene may be associated with increased …	GO:0007165 (signal transduction), GO:0007596 (blood coagulation), GO:0008104 (protein localization), GO:0005739 (mitochondrion), GO:0005829 (cytosol), GO:0005886 (plasma membrane), R-HSA-109582 (Homo sapiens: Hemostasis), R-HSA-983231 (Homo sapiens: Factors involved in megakaryocyte development and platelet production)		-0.70524	-0.602081		0.455283	0.54792	0.304118				253.907	21.1221	25.5826	1.55038	2.65428	27.6584	0.000370796	0.010064	2.995e-06	4.24643e-06	0.2	0.464103	0.00457924	0.866025	0.978809	0.0576689	0.00369115		2.6326	2.97598	8.35563	9.0424	7.32549
ENSG00000147471	PLPBP	PC	pyridoxal phosphate binding protein		GO:0008150 (biological_process), GO:0005622 (intracellular), GO:0005737 (cytoplasm), GO:0005739 (mitochondrion), GO:0070062 (extracellular vesicular exosome), GO:0030170 (pyridoxal phosphate binding)		0.494815	0.699779		-0.114427	-0.638359	-0.441807				253.465	51.0431	12.173	-1.08086	4.34866	27.5857	0.000374495	0.0101412	3.98685e-06	4.26557e-06	0.2	0.464103	0.0264215	-0.866025	-0.955523	0.0576689	0.0111846		27.2417	31.7056	17.1691	11.3316	13.2774
ENSG00000143149	ALDH9A1	PC	aldehyde dehydrogenase 9 family member A1	This protein belongs to the aldehyde dehydrogenase family of proteins. It has a high activity for oxidation of gamma-aminobutyraldehyde and other amino aldehydes. The enzyme catalyzes the dehydrogenation of gamma-aminobutyraldehyde to gamma-aminobutyric acid (GABA). This isozyme is a tetramer of identical 54-kD subunits. [provided by RefSeq, Jul 2008]. Publication Note: This RefSeq record include…	hsa00010 (Glycolysis / Gluconeogenesis), hsa00053 (Ascorbate and aldarate metabolism), hsa00071 (Fatty acid degradation), hsa00280 (Valine, leucine and isoleucine degradation), hsa00310 (Lysine degradation), hsa00330 (Arginine and proline metabolism), hsa00340 (Histidine metabolism), hsa00380 (Tryptophan metabolism), hsa00410 (beta-Alanine metabolism), hsa00561 (Glycerolipid metabolism), hsa00620…		0.234609	0.551628		-0.200882	-0.343457	-0.241898				253.305	78.2217	30.4114	-0.682475	6.04135	27.5595	0.00037584	0.0101545	7.47388e-06	7.66821e-06	0.2	0.464103	0.175513	-0.866025	-0.928641	0.0576689	0.022636		75.3152	94.3156	55.1701	49.7904	53.5676
ENSG00000196510	ANAPC7	PC	anaphase promoting complex subunit 7	This gene encodes a tetratricopeptide repeat containing component of the anaphase promoting complex/cyclosome (APC/C), a large E3 ubiquitin ligase that controls cell cycle progression by targeting a number of cell cycle regulators such as B-type cyclins for 26S proteasome-mediated degradation through ubiquitination. The encoded protein is required for proper protein ubiquitination function of APC…	hsa04110 (Cell cycle), hsa04114 (Oocyte meiosis), hsa04120 (Ubiquitin mediated proteolysis), hsa04914 (Progesterone-mediated oocyte maturation), hsa05166 (Human T-cell leukemia virus 1 infection), GO:0007067 (mitotic nuclear division), GO:0031145 (anaphase-promoting complex-dependent proteasomal ubiquitin-dependent protein catabolic process), GO:0042787 (protein ubiquitination involved in ubiquit…		-0.315794	-0.639197		0.312955	0.495738	0.146297				253.042	73.9485	38.4538	0.826711	5.74452	27.5163	0.000378068	0.0101811	4.03854e-06	4.47404e-06	0.2	0.464103	0.0243263	0.866025	0.922367	0.0576689	0.0256612		40.748	32.1635	64.098	73.0259	56.887
ENSG00000066455	GOLGA5	PC	golgin A5	The Golgi apparatus, which participates in glycosylation and transport of proteins and lipids in the secretory pathway, consists of a series of stacked cisternae (flattened membrane sacs). Interactions between the Golgi and microtubules are thought to be important for the reorganization of the Golgi after it fragments during mitosis. This gene encodes one of the golgins, a family of proteins loca…	GO:0000301 (retrograde transport, vesicle recycling within Golgi), GO:0007030 (Golgi organization), GO:0048193 (Golgi vesicle transport), GO:0000139 (Golgi membrane), GO:0005794 (Golgi apparatus), GO:0005801 (cis-Golgi network), GO:0016020 (membrane), GO:0016021 (integral component of membrane), GO:0030133 (transport vesicle), GO:0031985 (Golgi cisterna), GO:0017137 (Rab GTPase binding), GO:00428…		0.522314	0.396112		-0.260574	-0.302768	-0.355085				252.987	54.1807	49.9033	-0.833037	4.51534	27.5073	0.000378536	0.0101811	1.58163e-05	1.67826e-05	0.2	0.464103	0.0534849	-0.866025	-0.988986	0.0576689	0.00138521		32.1635	29.3019	17.8559	17.2836	16.5968
ENSG00000203965	EFCAB7	PC	EF-hand calcium binding domain 7		GO:0005929 (cilium), GO:0005509 (calcium ion binding), R-HSA-162582 (Homo sapiens: Signal Transduction), R-HSA-5358351 (Homo sapiens: Signaling by Hedgehog), R-HSA-5632684 (Homo sapiens: Hedgehog 'on' state), R-HSA-5635838 (Homo sapiens: Activation of SMO)		0.59654	0.58377		-0.410173	-0.359964	-0.410173				252.564	24.6972	49.3564	-1.26492	2.87292	26.9115	0.000411005	0.0106682	6.14638e-06	7.24918e-06	0.138641	0.464103	7.56138e-06	-0.888523	-0.999577	0.043925	1.04424e-05		10.9882	10.8738	4.46397	4.69289	4.46397
ENSG00000113758	DBN1	PC	drebrin 1	The protein encoded by this gene is a cytoplasmic actin-binding protein thought to play a role in the process of neuronal growth. It is a member of the drebrin family of proteins that are developmentally regulated in the brain. A decrease in the amount of this protein in the brain has been implicated as a possible contributing factor in the pathogenesis of memory disturbance in Alzheimer_s diseas…	GO:0007015 (actin filament organization), GO:0010643 (cell communication by chemical coupling), GO:0010644 (cell communication by electrical coupling), GO:0032507 (maintenance of protein location in cell), GO:0048168 (regulation of neuronal synaptic plasticity), GO:0050773 (regulation of dendrite development), GO:0061351 (neural precursor cell proliferation), GO:0005737 (cytoplasm), GO:0005886 (p…		-0.342737	-0.344295		0.327642	0.279895	0.0794952				252.276	89.2413	55.7668	0.585514	7.08165	27.3905	0.000384651	0.010321	1.0456e-05	1.06731e-05	0.2	0.464103	0.0235269	0.866025	0.944091	0.0576689	0.0157356		104.045	103.93	166.769	161.275	140.1
ENSG00000188610	FAM72B	PC	family with sequence similarity 72 member B		GO:0005829 (cytosol), GO:0043231 (intracellular membrane-bounded organelle)		0.838224	0.869769		-0.322298	-0.990284	-0.395411				251.903	14.4011	33.5829	-2.08604	2.26524	27.3294	0.000387896	0.010321	1.91672e-07	2.59831e-07	0.2	0.464103	0.0051878	-0.866025	-0.982971	0.0576689	0.00266075		8.35563	8.58455	2.6326	0.915686	2.40368
ENSG00000138688	KIAA1109	PC	KIAA1109	This gene is located on the long arm of chromosome 4 in a region that is associated with susceptibility to celiac disease. The encoded protein is similar to a Chinese hamster protein that is associated with spermatocyte and adipocyte differentiation. The C-terminus of the protein is also similar to a Caenorhabditis elegans protein that plays a role in lipid storage. In mammals, this protein is th…	GO:0001558 (regulation of cell growth), GO:0030856 (regulation of epithelial cell differentiation), GO:0005634 (nucleus), GO:0016020 (membrane), GO:0016021 (integral component of membrane), GO:0005515 (protein binding)		0.601685	0.657192		-0.598645	-0.427199	-0.233034				251.901	28.6676	96.2144	-1.29837	3.09015	27.3291	0.000387916	0.010321	4.08688e-06	4.73812e-06	0.2	0.464103	0.00134864	-0.866025	-0.987086	0.0576689	0.00175824		12.5907	13.163	4.34951	5.15073	6.18088
ENSG00000171858	RPS21	PC	ribosomal protein S21	Ribosomes, the organelles that catalyze protein synthesis, consist of a small 40S subunit and a large 60S subunit. Together these subunits are composed of 4 RNA species and approximately 80 structurally distinct proteins. This gene encodes a ribosomal protein that is a component of the 40S subunit. The protein belongs to the S21E family of ribosomal proteins. It is located in the cytoplasm. Alter…	hsa03010 (Ribosome), GO:0000184 (nuclear-transcribed mRNA catabolic process, nonsense-mediated decay), GO:0000447 (endonucleolytic cleavage in ITS1 to separate SSU-rRNA from 5.8S rRNA and LSU-rRNA from tricistronic rRNA transcript (SSU-rRNA, 5.8S rRNA, LSU-rRNA)), GO:0000461 (endonucleolytic cleavage to generate mature 3'-end of SSU-rRNA from (SSU-rRNA, 5.8S rRNA, LSU-rRNA)), GO:0006364 (rRNA pro…		-0.261014	-0.571597		0.47678	0.208901	0.146929				251.897	97.8466	4.27358	0.695494	9.08457	27.3285	0.000387947	0.010321	3.84036e-06	4.02496e-06	0.2	0.464103	0.0339693	0.866025	0.901959	0.0576689	0.0363037		438.27	352.997	732.205	607.786	582.147
ENSG00000221914	PPP2R2A	PC	protein phosphatase 2 regulatory subunit Balpha	The product of this gene belongs to the phosphatase 2 regulatory subunit B family. Protein phosphatase 2 is one of the four major Ser/Thr phosphatases, and it is implicated in the negative control of cell growth and division. It consists of a common heteromeric core enzyme, which is composed of a catalytic subunit and a constant regulatory subunit, that associates with a variety of regulatory sub…	hsa03015 (mRNA surveillance pathway), hsa04071 (Sphingolipid signaling pathway), hsa04151 (PI3K-Akt signaling pathway), hsa04152 (AMPK signaling pathway), hsa04261 (Adrenergic signaling in cardiomyocytes), hsa04390 (Hippo signaling pathway), hsa04530 (Tight junction), hsa04728 (Dopaminergic synapse), hsa05142 (Chagas disease (American trypanosomiasis)), hsa05160 (Hepatitis C), hsa05165 (Human pap…		0.40773	0.396334		-0.454919	-0.154178	-0.194966				251.818	74.3439	21.309	-0.688007	5.77198	27.3155	0.00038864	0.010321	8.64209e-06	8.92705e-06	0.2	0.464103	0.0108999	-0.866025	-0.971924	0.0576689	0.00562327		70.7367	70.1644	38.001	47.2723	45.8988
ENSG00000106144	CASP2	PC	caspase 2	This gene encodes a member of the cysteine-aspartic acid protease (caspase) family. Caspases mediate cellular apoptosis through the proteolytic cleavage of specific protein substrates. The encoded protein may function in stress-induced cell death pathways, cell cycle maintenance, and the suppression of tumorigenesis. Increased expression of this gene may play a role in neurodegenerative disorders…	hsa04210 (Apoptosis), GO:0001554 (luteolysis), GO:0003407 (neural retina development), GO:0006915 (apoptotic process), GO:0006919 (activation of cysteine-type endopeptidase activity involved in apoptotic process), GO:0006977 (DNA damage response, signal transduction by p53 class mediator resulting in cell cycle arrest), GO:0007420 (brain development), GO:0007568 (aging), GO:0008630 (intrinsic apo…		0.427977	0.279918		-0.310123	-0.266605	-0.131167				251.783	80.4004	85.665	-0.605438	6.20965	27.3098	0.000388947	0.010321	1.22827e-05	1.2615e-05	0.2	0.464103	0.0520294	-0.866025	-0.968094	0.0576689	0.00680846		97.7495	88.0203	57.8027	59.634	65.7005
ENSG00000152082	MZT2B	PC	mitotic spindle organizing protein 2B		GO:0005654 (nucleoplasm), GO:0005813 (centrosome), GO:0005815 (microtubule organizing center), GO:0005819 (spindle), GO:0005829 (cytosol), GO:0008274 (gamma-tubulin ring complex), GO:0005515 (protein binding)		-0.487733	-0.27577		0.166308	0.429914	0.167281				251.169	90.6208	4.61849	0.646726	7.2603	27.2092	0.000394382	0.0104275	6.1944e-06	6.36164e-06	0.2	0.464103	0.0198918	0.866025	0.919763	0.0576689	0.0269523		105.762	122.816	167.571	201.565	167.685
ENSG00000263266	RPS7P1	p_Pg	ribosomal protein S7 pseudogene 1				0.564231	1.4447		-0.77917	-0.0317765	-1.19799				251.125	70.5165	6.27576	-1.73905	5.51027	27.202	0.00039477	0.0104275	4.99026e-07	5.37336e-07	0.2	0.464103	0.243285	-0.866025	-0.85228	0.0576689	0.0666237		54.4833	101.985	20.2595	35.3684	14.651
ENSG00000128585	MKLN1	PC	muskelin 1	Muskelin is an intracellular protein that acts as a mediator of cell spreading and cytoskeletal responses to the extracellular matrix component thrombospondin I (MIM 188060) (Adams et al., 1998 [PubMed 9724633]).[supplied by OMIM, Mar 2008].	GO:0007160 (cell-matrix adhesion), GO:0007165 (signal transduction), GO:0008360 (regulation of cell shape), GO:0031532 (actin cytoskeleton reorganization), GO:0001726 (ruffle), GO:0005829 (cytosol), GO:0005938 (cell cortex)		0.549207	0.46574		-0.41427	-0.312516	-0.288161				251.033	44.4902	77.9591	-0.954256	3.96885	27.187	0.000395591	0.0104275	1.56361e-05	1.69716e-05	0.2	0.464103	0.0138151	-0.866025	-0.993758	0.0576689	0.000591479		22.4343	21.0608	10.5304	11.4461	11.675
ENSG00000213221	DNLZ	PC	DNL-type zinc finger		GO:0006457 (protein folding), GO:0030150 (protein import into mitochondrial matrix), GO:0050821 (protein stabilization), GO:0005654 (nucleoplasm), GO:0005739 (mitochondrion), GO:0008270 (zinc ion binding), GO:0051087 (chaperone binding)		-0.362231	-0.365902		0.198733	0.340642	0.188757				250.587	75.429	67.2583	0.63121	5.84217	27.1141	0.000399603	0.0105099	1.79077e-05	1.94563e-05	0.2	0.464103	0.00989732	0.866025	0.97571	0.0576689	0.00452783		43.0372	42.9228	64.4414	71.309	63.9835
ENSG00000261915	AC026954.2	PC					0.551812	0.20394		-0.262474	-0.288707	-0.204571				250.362	82.6127	82.729	-0.654744	6.39844	27.0773	0.000401643	0.0105214	8.07286e-06	8.22826e-06	0.2	0.464103	0.203172	-0.866025	-0.916006	0.0576689	0.0288507		120.871	94.5446	67.8752	66.6161	70.7367
ENSG00000182224	CYB5D1	PC	cytochrome b5 domain containing 1		GO:0046872 (metal ion binding)		0.77964	0.436062		-0.5977	-0.301072	-0.316931				250.344	37.6514	40.7925	-1.19182	3.58717	27.0743	0.000401811	0.0105214	6.6661e-06	7.40413e-06	0.2	0.464103	0.126697	-0.866025	-0.948606	0.0576689	0.013878		20.1451	15.4522	6.52426	8.47009	8.35563
ENSG00000136243	NUPL2	PC	nucleoporin like 2		hsa03013 (RNA transport), GO:0006406 (mRNA export from nucleus), GO:0006409 (tRNA export from nucleus), GO:0006611 (protein export from nucleus), GO:0007077 (mitotic nuclear envelope disassembly), GO:0010827 (regulation of glucose transport), GO:0016032 (viral process), GO:0016925 (protein sumoylation), GO:0019083 (viral transcription), GO:0031047 (gene silencing by RNA), GO:0075733 (intracellula…		0.349181	0.692292		-0.40522	-0.40522	-0.231034				250.302	49.8991	34.2391	-0.96703	4.2721	26.5482	0.00043245	0.0111036	1.32445e-05	1.41468e-05	0.138641	0.464103	0.151525	-0.888523	-0.942877	0.043925	0.0162476		23.5789	30.4466	13.163	13.163	15.1088
ENSG00000083520	DIS3	PC	DIS3 homolog, exosome endoribonuclease and 3'-5' exoribonuclease		hsa03018 (RNA degradation), GO:0006364 (rRNA processing), GO:0016075 (rRNA catabolic process), GO:0043488 (regulation of mRNA stability), GO:0043547 (positive regulation of GTPase activity), GO:0043928 (exonucleolytic nuclear-transcribed mRNA catabolic process involved in deadenylation-dependent decay), GO:0071034 (CUT catabolic process), GO:0090503 (RNA phosphodiester bond hydrolysis, exonucleol…		0.390716	0.82111		-0.531259	-0.26964	-0.410927				250	38.5262	97.5435	-1.191	3.64111	27.0183	0.000404948	0.0105803	7.31184e-06	8.08335e-06	0.2	0.464103	0.171678	-0.866025	-0.930544	0.0576689	0.0217432		15.4522	21.5186	7.21103	9.0424	8.01225
ENSG00000284292	AC004922.1	PC					-0.673903	-0.426247		0.181046	0.523907	0.395196				249.677	51.5898	74.7455	1.02068	4.37754	26.9654	0.000407933	0.0106349	9.32315e-06	1.09428e-05	0.2	0.464103	0.0105343	0.866025	0.944796	0.0576689	0.0154405		11.4461	13.9642	22.3198	28.8441	26.2115
ENSG00000275854	AC084824.4	sense_intronic					0.39311	0.898844		-0.566219	-0.413	-0.312735				249.463	31.9566	10.726	-1.33287	3.27551	26.9305	0.000409918	0.0106632	5.6922e-06	6.46195e-06	0.2	0.464103	0.1952	-0.866025	-0.917747	0.0576689	0.0279661		11.9039	17.7414	5.15073	5.95196	6.52426
ENSG00000243449	C4orf48	PC	chromosome 4 open reading frame 48		GO:0005576 (extracellular region)		-0.481539	-0.524057		0.208645	0.637835	0.159117				248.728	69.9108	3.11264	0.897699	5.47135	26.8108	0.000416815	0.0107954	5.05138e-06	5.66167e-06	0.2	0.464103	0.0548899	0.866025	0.87581	0.0576689	0.0515473		29.5309	28.6152	48.8747	66.5017	47.1578
ENSG00000075089	ACTR6	PC	ARP6 actin related protein 6 homolog		GO:0006338 (chromatin remodeling), GO:0005634 (nucleus), GO:0005737 (cytoplasm), GO:0005856 (cytoskeleton), GO:0005515 (protein binding)		0.371868	0.970393		-0.293694	-0.44882	-0.599747				248.527	33.4707	35.9637	-1.37989	3.35835	26.7782	0.000418724	0.0108213	5.04269e-06	5.69428e-06	0.2	0.464103	0.222281	-0.866025	-0.896096	0.0576689	0.0395726		12.2473	19.5728	6.9821	6.06642	5.26519
ENSG00000249835	VCAN-AS1	antisense	VCAN antisense RNA 1				0.467648	0.784603		-0.828988	-0.324104	-0.0991591				247.517	69.0444	2.74249	-1.07002	5.40118	26.6138	0.000428478	0.0110493	2.04192e-06	2.11501e-06	0.2	0.464103	0.068852	-0.866025	-0.923674	0.0576689	0.0250211		54.3688	68.2186	20.9463	30.561	36.0551
ENSG00000271741	AC114490.2	PC					0.732774	0.534341		-0.421568	-0.363791	-0.481756				247.207	0.243943	90.5695	-2.23857	1.16571	26.5635	0.000431519	0.0111036	5.54153e-07	8.94986e-07	0.2	0.464103	0.0767073	-0.866025	-0.984638	0.0576689	0.00228033		4.23505	3.43382	0.801225	0.915686	0.686764
ENSG00000182196	ARL6IP4	PC	ADP ribosylation factor like GTPase 6 interacting protein 4		GO:0006397 (mRNA processing), GO:0008380 (RNA splicing), GO:0005634 (nucleus), GO:0005730 (nucleolus), GO:0016607 (nuclear speck), GO:0003723 (RNA binding), GO:0005515 (protein binding)		-0.371291	-0.305981		0.218464	0.272405	0.186402				246.86	78.3227	34.7102	0.582493	6.0573	26.5071	0.000434956	0.0111439	2.52545e-05	2.72076e-05	0.2	0.464103	0.00100605	0.866025	0.990996	0.0576689	0.00102421		49.9049	52.3086	76.1164	79.0924	74.3995
ENSG00000265401	AC093484.3	antisense					-0.271541	-0.304617		0.251874	0.206634	0.117651				246.586	97.283	3.24724	0.483412	8.77115	26.4628	0.000437681	0.0111896	2.6539e-05	2.729e-05	0.2	0.464103	0.00564427	0.866025	0.977232	0.0576689	0.00410982		356.545	348.418	513.356	497.446	467.572
ENSG00000140319	SRP14	PC	signal recognition particle 14		hsa03060 (Protein export), GO:0006613 (cotranslational protein targeting to membrane), GO:0006614 (SRP-dependent cotranslational protein targeting to membrane), GO:0042493 (response to drug), GO:0043312 (neutrophil degranulation), GO:0045047 (protein targeting to ER), GO:0005576 (extracellular region), GO:0005634 (nucleus), GO:0005737 (cytoplasm), GO:0005786 (signal recognition particle, endoplas…		0.587981	0.159668		-0.250868	-0.299508	-0.197274				246.419	97.5101	9.9857	-0.640906	8.89467	26.4357	0.000439362	0.0112084	6.42789e-06	6.38716e-06	0.2	0.464103	0.246627	-0.866025	-0.880477	0.0576689	0.0487041		695.807	516.561	388.136	375.202	402.902
ENSG00000144635	DYNC1LI1	PC	dynein cytoplasmic 1 light intermediate chain 1		hsa04145 (Phagosome), hsa04962 (Vasopressin-regulated water reabsorption), hsa05132 (Salmonella infection), GO:0000226 (microtubule cytoskeleton organization), GO:0006888 (ER to Golgi vesicle-mediated transport), GO:0007018 (microtubule-based movement), GO:0007067 (mitotic nuclear division), GO:0016032 (viral process), GO:0019886 (antigen processing and presentation of exogenous peptide antigen v…		0.215729	0.887433		-0.323959	-0.318021	-0.461181				246.259	64.7712	56.2547	-1.01112	5.14252	26.4097	0.000440977	0.0112256	4.20128e-06	4.36436e-06	0.2	0.464103	0.279257	-0.866025	-0.852274	0.0576689	0.0666275		38.3443	62.2666	25.7537	25.8681	23.2355
ENSG00000239559	RPL37P2	p_Pg	ribosomal protein L37 pseudogene 2				0.683376	0.906013		-0.344634	-0.106663	-1.13809				246.024	63.8207	1.21982	-1.34383	5.0853	26.3717	0.000443355	0.011262	1.43597e-06	1.51553e-06	0.2	0.464103	0.0168409	-0.866025	-0.942939	0.0576689	0.0162213		48.7603	57.2304	22.8921	27.3561	12.3618
ENSG00000260894	AC027682.3	antisense					0.298084	0.924519		-0.58635	-0.429672	-0.206582				245.643	55.5434	0.959031	-1.13247	4.59265	26.31	0.000447239	0.0113146	4.58973e-06	4.85474e-06	0.2	0.464103	0.242097	-0.866025	-0.872575	0.0576689	0.0535473		27.4706	43.4951	13.9642	15.7956	18.7716
ENSG00000152818	UTRN	PC	utrophin	This gene shares both structural and functional similarities with the dystrophin gene. It contains an actin-binding N-terminus, a triple coiled-coil repeat central region, and a C-terminus that consists of protein-protein interaction motifs which interact with dystroglycan protein components. The protein encoded by this gene is located at the neuromuscular synapse and myotendinous junctions, wher…	GO:0001954 (positive regulation of cell-matrix adhesion), GO:0006936 (muscle contraction), GO:0007517 (muscle organ development), GO:0007528 (neuromuscular junction development), GO:0014894 (response to denervation involved in regulation of muscle adaptation), GO:2000649 (regulation of sodium ion transmembrane transporter activity), GO:0005654 (nucleoplasm), GO:0005737 (cytoplasm), GO:0005856 (cy…		0.726122	0.399132		-0.146296	-0.324217	-0.654742				245.634	58.6053	60.9069	-1.00089	4.76653	26.3086	0.000447332	0.0113146	5.6451e-06	5.93141e-06	0.2	0.464103	0.100785	-0.866025	-0.930611	0.0576689	0.0217119		43.1517	33.9948	22.6632	19.8017	15.3377
ENSG00000156467	UQCRB	PC	ubiquinol-cytochrome c reductase binding protein	This gene encodes a subunit of the ubiquinol-cytochrome c oxidoreductase complex, which consists of one mitochondrial-encoded and 10 nuclear-encoded subunits. The protein encoded by this gene binds ubiquinone and participates in the transfer of electrons when ubiquinone is bound. This protein plays an important role in hypoxia-induced angiogenesis through mitochondrial reactive oxygen species-med…	hsa00190 (Oxidative phosphorylation), hsa01100 (Metabolic pathways), hsa04260 (Cardiac muscle contraction), hsa04714 (Thermogenesis), hsa04932 (Non-alcoholic fatty liver disease (NAFLD)), hsa05010 (Alzheimer disease), hsa05012 (Parkinson disease), hsa05016 (Huntington disease), GO:0006119 (oxidative phosphorylation), GO:0006122 (mitochondrial electron transport, ubiquinol to cytochrome c), GO:000…		1.11707	0.129679		-0.338257	-0.519956	-0.388532				245.14	97.9223	61.807	-1.12379	9.15862	26.2286	0.000452435	0.0114194	1.05302e-06	1.0572e-06	0.2	0.464103	0.348231	-0.866025	-0.784304	0.0576689	0.116284		1125.26	566.581	409.083	360.437	395.004
ENSG00000116754	SRSF11	PC	serine and arginine rich splicing factor 11	This gene encodes 54-kD nuclear protein that contains an arginine/serine-rich region similar to segments found in pre-mRNA splicing factors. Although the function of this protein is not yet known, structure and immunolocalization data suggest that it may play a role in pre-mRNA processing. Alternative splicing results in multiple transcript variants encoding different proteins. In addition, a pse…	GO:0000398 (mRNA splicing, via spliceosome), GO:0006369 (termination of RNA polymerase II transcription), GO:0006397 (mRNA processing), GO:0006405 (RNA export from nucleus), GO:0006406 (mRNA export from nucleus), GO:0008380 (RNA splicing), GO:0031124 (mRNA 3'-end processing), GO:0005634 (nucleus), GO:0005654 (nucleoplasm), GO:0016607 (nuclear speck), GO:0003723 (RNA binding), GO:0005515 (protein …		0.37814	0.341858		-0.350576	-0.337231	-0.0321909				244.768	93.7836	56.7595	-0.597651	7.80351	26.1686	0.000456312	0.0114691	9.54021e-06	9.54831e-06	0.2	0.464103	0.0162731	-0.866025	-0.949246	0.0576689	0.0136207		283.748	276.652	170.432	172.034	213.011
ENSG00000164168	TMEM184C	PC	transmembrane protein 184C		GO:0006810 (transport), GO:0016021 (integral component of membrane), GO:0005215 (transporter activity)		0.639502	0.676273		-0.571188	-0.297228	-0.447358				244.699	12.0037	65.517	-1.65137	2.12085	26.1573	0.000457043	0.0114691	1.76768e-06	2.31276e-06	0.2	0.464103	0.0005635	-0.866025	-0.993661	0.0576689	0.000605303		6.86764	7.09657	1.83137	2.6326	2.17475
ENSG00000156976	EIF4A2	PC	eukaryotic translation initiation factor 4A2		hsa03013 (RNA transport), GO:0000289 (nuclear-transcribed mRNA poly(A) tail shortening), GO:0006413 (translational initiation), GO:0006446 (regulation of translational initiation), GO:0010468 (regulation of gene expression), GO:0010501 (RNA secondary structure unwinding), GO:0016032 (viral process), GO:1900260 (negative regulation of RNA-directed RNA polymerase activity), GO:0005829 (cytosol), GO…		0.346948	0.276354		-0.0830768	-0.220899	-0.319326				244.674	95.7352	29.8898	-0.519879	8.26159	26.1534	0.000457299	0.0114691	1.7981e-05	1.79523e-05	0.2	0.464103	0.00538882	-0.866025	-0.965586	0.0576689	0.00762414		383.901	365.473	284.435	258.338	241.169
ENSG00000074266	EED	PC	embryonic ectoderm development	This gene encodes a member of the Polycomb-group (PcG) family. PcG family members form multimeric protein complexes, which are involved in maintaining the transcriptional repressive state of genes over successive cell generations. This protein interacts with enhancer of zeste 2, the cytoplasmic tail of integrin beta7, immunodeficiency virus type 1 (HIV-1) MA protein, and histone deacetylase prote…	GO:0000122 (negative regulation of transcription from RNA polymerase II promoter), GO:0006349 (regulation of gene expression by genetic imprinting), GO:0006351 (transcription, DNA-templated), GO:0016571 (histone methylation), GO:0021510 (spinal cord development), GO:0045814 (negative regulation of gene expression, epigenetic), GO:0045892 (negative regulation of transcription, DNA-templated), GO:0…		0.347556	0.794712		-0.303871	-0.203522	-0.634875				244.35	56.7463	55.5565	-1.03389	4.66734	26.101	0.000460726	0.0115308	6.24678e-06	6.58077e-06	0.2	0.464103	0.172609	-0.866025	-0.909137	0.0576689	0.0324269		30.4466	42.236	18.6571	20.1451	14.4221
ENSG00000112312	GMNN	PC	geminin, DNA replication inhibitor	This gene encodes a protein that plays a critical role in cell cycle regulation. The encoded protein inhibits DNA replication by binding to DNA replication factor Cdt1, preventing the incorporation of minichromosome maintenance proteins into the pre-replication complex. The encoded protein is expressed during the S and G2 phases of the cell cycle and is degraded by the anaphase-promoting complex …	GO:0006461 (protein complex assembly), GO:0008156 (negative regulation of DNA replication), GO:0009887 (organ morphogenesis), GO:0035563 (positive regulation of chromatin binding), GO:0045786 (negative regulation of cell cycle), GO:0045892 (negative regulation of transcription, DNA-templated), GO:0071163 (DNA replication preinitiation complex assembly), GO:2000104 (negative regulation of DNA-depe…		0.574949	0.171702		-0.181924	-0.33487	-0.229856				244.164	94.8183	15.9754	-0.639644	8.02127	26.0711	0.000462694	0.0115557	7.44268e-06	7.43002e-06	0.2	0.464103	0.23088	-0.866025	-0.887607	0.0576689	0.0444615		376.805	284.435	222.168	199.62	214.843
ENSG00000267356	AC006557.3	antisense					0.562646	0.775984		-0.425314	-0.585938	-0.327378				243.785	3.41521	4.23151	-2.01524	1.56222	26.0098	0.000466759	0.0116328	7.65459e-07	1.11937e-06	0.2	0.464103	0.0635032	-0.866025	-0.980063	0.0576689	0.00336912		4.46397	5.49411	1.25907	0.915686	1.48799
ENSG00000168286	THAP11	PC	THAP domain containing 11	The protein encoded by this gene contains a THAP domain, which is a conserved DNA-binding domain that has striking similarity to the site-specific DNA-binding domain (DBD) of Drosophila P element transposases. [provided by RefSeq, Jul 2008].	GO:0000122 (negative regulation of transcription from RNA polymerase II promoter), GO:0006351 (transcription, DNA-templated), GO:0005654 (nucleoplasm), GO:0005737 (cytoplasm), GO:0045171 (intercellular bridge), GO:0000978 (RNA polymerase II core promoter proximal region sequence-specific DNA binding), GO:0001078 (RNA polymerase II core promoter proximal region sequence-specific DNA binding transc…		-0.365891	-0.291409		0.280992	0.168631	0.207677				243.398	81.1911	76.0579	0.563008	6.27679	25.9475	0.000470935	0.0117123	2.85652e-05	2.89205e-05	0.2	0.464103	0.00169554	0.866025	0.984577	0.0576689	0.00229383		58.4894	61.6943	92.7132	85.6166	88.0203
ENSG00000110514	MADD	PC	MAP kinase activating death domain	Tumor necrosis factor alpha (TNF-alpha) is a signaling molecule that interacts with one of two receptors on cells targeted for apoptosis. The apoptotic signal is transduced inside these cells by cytoplasmic adaptor proteins. The protein encoded by this gene is a death domain-containing adaptor protein that interacts with the death domain of TNF-alpha receptor 1 to activate mitogen-activated prote…	GO:0000187 (activation of MAPK activity), GO:0007166 (cell surface receptor signaling pathway), GO:0010803 (regulation of tumor necrosis factor-mediated signaling pathway), GO:0032483 (regulation of Rab protein signal transduction), GO:0042981 (regulation of apoptotic process), GO:0043547 (positive regulation of GTPase activity), GO:0051726 (regulation of cell cycle), GO:0061024 (membrane organiz…		-0.435993	-0.362141		0.24569	0.233831	0.318613				243.127	64.2328	86.1529	0.70709	5.10846	25.9039	0.000473891	0.0117569	3.08819e-05	3.43205e-05	0.2	0.464103	0.000801786	0.866025	0.992212	0.0576689	0.000824006		24.1512	25.5247	39.9468	39.6034	42.1215
[truncated: 11,410 more rows]
