# Supplementary material for: Effects of Siberian fir terpenes extract Abisil on antioxidant activity, autophagy, transcriptome and proteome of human fibroblasts
Source: Aging (Albany NY). 2021 Aug 24;13(16):20050–80. doi: 10.18632/aging.203448 (PMC8436938; doi:10.18632/aging.203448)
Supplement: Supplementary Table 3 [file aging-13-203448-s004.xlsx]

## Sheet: Hi vs Low
	Supplementary Table 3. The results of differential gene expression analysis between samples treated with high-concentration Abisil (50 µg/ml) and samples treated with low-concentration (5 µg/ml).
Gene ID	Gene	Bio type	Name		RefSeq_Summary	Annotation		5 μg/ml				50 μg/ml				Low	Hi	Score	LogCPM rank (%)	Tr.Length rank (%)	LogFC	LogCPM	F	p (QLF test)	FDR (QLF test)	p (LR test)	p (ex. test)	p (Mann-Wh.)	FDR (Mann-Wh.)	p (t-test)	Spear-man r	Pearson r	p (Spearman)	p (Pearson)	CPMs:	5mkg_1	5mkg_2	5mkg_3	50mkg_1	50mkg_2	50mkg_3
Hi vs Low								0	0	0		1	1	1																						0	0	0	1	1	1
Abysil overview								1	1	1		2	2	2																						1	1	1	2	2	2
ENSG00000100292	HMOX1	PC	heme oxygenase 1		Heme oxygenase, an essential enzyme in heme catabolism, cleaves heme to form biliverdin, which is subsequently converted to bilirubin by biliverdin reductase, and carbon monoxide, a putative neurotransmitter. Heme oxygenase activity is induced by its substrate heme and by various nonheme substances. Heme oxygenase occurs as 2 isozymes, an inducible heme oxygenase-1 and a constitutive heme oxygena…	hsa00860 (Porphyrin and chlorophyll metabolism), hsa01100 (Metabolic pathways), hsa04066 (HIF-1 signaling pathway), hsa04216 (Ferroptosis), hsa04978 (Mineral absorption), hsa05200 (Pathways in cancer), hsa05206 (MicroRNAs in cancer), hsa05225 (Hepatocellular carcinoma), hsa05418 (Fluid shear stress and atherosclerosis), GO:0001525 (angiogenesis), GO:0001935 (endothelial cell proliferation), GO:00…		0.465649	0.513236	0.398119		-0.44889	-0.551973	-0.376141				602.633	60.4271	22.0493	-0.979517	4.97912	84.1173	1.03865e-07	0.0012013	9.51652e-17	1.14124e-16	0.1	0.310247	0.000123293	-0.87831	-0.992151	0.0213116	9.21766e-05		41.6836	43.1486	39.686	21.1748	19.5767	22.3733
ENSG00000131747	TOP2A	PC	DNA topoisomerase II alpha		This gene encodes a DNA topoisomerase, an enzyme that controls and alters the topologic states of DNA during transcription. This nuclear enzyme is involved in processes such as chromosome condensation, chromatid separation, and the relief of torsional stress that occurs during DNA transcription and replication. It catalyzes the transient breaking and rejoining of two strands of duplex DNA which a…	hsa01524 (Platinum drug resistance), GO:0000712 (resolution of meiotic recombination intermediates), GO:0000819 (sister chromatid segregation), GO:0002244 (hematopoietic progenitor cell differentiation), GO:0006265 (DNA topological change), GO:0006266 (DNA ligation), GO:0006312 (mitotic recombination), GO:0006974 (cellular response to DNA damage stimulus), GO:0007059 (chromosome segregation), GO:…		-0.278602	-0.264992	-0.301575		0.346059	0.304066	0.195044				515.363	84.2815	60.3718	0.576001	6.6801	66.9071	4.67993e-07	0.00169635	2.6375e-13	2.4588e-13	0.1	0.310247	0.00769403	0.87831	0.981891	0.0213116	0.000488947		82.3019	83.1009	80.9701	127.981	124.252	115.063
ENSG00000163931	TKT	PC	transketolase		This gene encodes a thiamine-dependent enzyme which plays a role in the channeling of excess sugar phosphates to glycolysis in the pentose phosphate pathway. Alternatively spliced transcript variants encoding multiple isoforms have been observed for this gene. [provided by RefSeq, Apr 2012].	hsa00030 (Pentose phosphate pathway), hsa01100 (Metabolic pathways), hsa01200 (Carbon metabolism), hsa01230 (Biosynthesis of amino acids), GO:0005999 (xylulose biosynthetic process), GO:0006098 (pentose-phosphate shunt), GO:0009052 (pentose-phosphate shunt, non-oxidative branch), GO:0040008 (regulation of growth), GO:0046166 (glyceraldehyde-3-phosphate biosynthetic process), GO:0005654 (nucleopla…		0.212936	0.219372	0.197941		-0.223969	-0.193726	-0.212553				508.758	98.4956	73.9991	-0.421159	9.69587	65.6621	5.28173e-07	0.00169635	1.86496e-10	1.87206e-10	0.1	0.310247	2.41243e-06	-0.87831	-0.998742	0.0213116	2.37292e-06		951.133	955.394	941.278	702.096	717.012	707.69
ENSG00000011426	ANLN	PC	anillin actin binding protein		This gene encodes an actin-binding protein that plays a role in cell growth and migration, and in cytokinesis. The encoded protein is thought to regulate actin cytoskeletal dynamics in podocytes, components of the glomerulus. Mutations in this gene are associated with focal segmental glomerulosclerosis 8. Alternative splicing results in multiple transcript variants encoding different isoforms. [p…	GO:0000281 (mitotic cytokinesis), GO:0000921 (septin ring assembly), GO:0002244 (hematopoietic progenitor cell differentiation), GO:0007067 (mitotic nuclear division), GO:0007096 (regulation of exit from mitosis), GO:0090521 (glomerular visceral epithelial cell migration), GO:0005654 (nucleoplasm), GO:0005826 (actomyosin contractile ring), GO:0015629 (actin cytoskeleton), GO:0003779 (actin bindin…		-0.230343	-0.282414	-0.276261		0.402569	0.179924	0.206526				489.834	91.8554	47.0298	0.534914	7.57906	62.141	7.51454e-07	0.00169635	2.65818e-12	2.59543e-12	0.1	0.310247	0.0229153	0.87831	0.950219	0.0213116	0.00365552		159.543	153.817	154.482	248.504	212.68	216.675
ENSG00000117984	CTSD	PC	cathepsin D		This gene encodes a lysosomal aspartyl protease composed of a dimer of disulfide-linked heavy and light chains, both produced from a single protein precursor. This proteinase, which is a member of the peptidase C1 family, has a specificity similar to but narrower than that of pepsin A. Transcription of this gene is initiated from several sites, including one which is a start site for an estrogen-…	hsa04071 (Sphingolipid signaling pathway), hsa04140 (Autophagy - animal), hsa04142 (Lysosome), hsa04210 (Apoptosis), hsa04915 (Estrogen signaling pathway), hsa05152 (Tuberculosis), GO:0006508 (proteolysis), GO:0006914 (autophagy), GO:0019886 (antigen processing and presentation of exogenous peptide antigen via MHC class II), GO:0030163 (protein catabolic process), GO:0030574 (collagen catabolic p…		0.172271	0.316927	0.19449		-0.287729	-0.177918	-0.218041				487.369	95.8413	46.5543	-0.459224	8.39992	61.6872	7.87308e-07	0.00169635	1.42399e-11	1.4162e-11	0.1	0.310247	0.00478378	-0.87831	-0.96745	0.0213116	0.00157201		375.552	415.371	381.412	272.475	294.183	286.059
ENSG00000013297	CLDN11	PC	claudin 11		This gene encodes a member of the claudin family. Claudins are integral membrane proteins and components of tight junction strands. Tight junction strands serve as a physical barrier to prevent solutes and water from passing freely through the paracellular space between epithelial or endothelial cell sheets, and also play critical roles in maintaining cell polarity and signal transductions. The p…	hsa04514 (Cell adhesion molecules (CAMs)), hsa04530 (Tight junction), hsa04670 (Leukocyte transendothelial migration), hsa05160 (Hepatitis C), GO:0007283 (spermatogenesis), GO:0008366 (axon ensheathment), GO:0016338 (calcium-independent cell-cell adhesion via plasma membrane cell-adhesion molecules), GO:0005886 (plasma membrane), GO:0005923 (tight junction), GO:0016021 (integral component of memb…		-0.22984	-0.299365	-0.211447		0.354703	0.225653	0.160296				469.042	91.4231	34.9503	0.501015	7.52132	58.3507	1.11894e-06	0.00169635	1.35959e-11	1.33578e-11	0.1	0.310247	0.0119586	0.87831	0.960595	0.0213116	0.00229858		153.683	146.359	155.681	231.457	211.481	202.026
ENSG00000181019	NQO1	PC	NAD(P)H quinone dehydrogenase 1		This gene is a member of the NAD(P)H dehydrogenase (quinone) family and encodes a cytoplasmic 2-electron reductase. This FAD-binding protein forms homodimers and reduces quinones to hydroquinones. This protein_s enzymatic activity prevents the one electron reduction of quinones that results in the production of radical species. Mutations in this gene have been associated with tardive dyskinesia (…	hsa00130 (Ubiquinone and other terpenoid-quinone biosynthesis), hsa05200 (Pathways in cancer), hsa05225 (Hepatocellular carcinoma), hsa05418 (Fluid shear stress and atherosclerosis), GO:0006521 (regulation of cellular amino acid metabolic process), GO:0006805 (xenobiotic metabolic process), GO:0006809 (nitric oxide biosynthetic process), GO:0007271 (synaptic transmission, cholinergic), GO:0007568…		0.295362	0.256873	0.181311		-0.312115	-0.308998	-0.112432				467.008	98.5388	47.9723	-0.487891	9.73525	57.9843	1.16412e-06	0.00169635	3.57023e-10	3.5918e-10	0.1	0.310247	0.00327044	-0.87831	-0.962107	0.0213116	0.00212659		1029.97	1002.8	951.532	675.328	676.793	775.875
ENSG00000166803	PCLAF	PC	PCNA clamp associated factor			GO:0006260 (DNA replication), GO:0006974 (cellular response to DNA damage stimulus), GO:0009411 (response to UV), GO:0019985 (translesion synthesis), GO:0051297 (centrosome organization), GO:0051726 (regulation of cell cycle), GO:0005634 (nucleus), GO:0005654 (nucleoplasm), GO:0005813 (centrosome), GO:0048471 (perinuclear region of cytoplasm), GO:0003682 (chromatin binding), GO:0005515 (protein b…		-0.370109	-0.192197	-0.328634		0.317305	0.366835	0.206799				466.603	80.8404	20.3545	0.608169	6.37061	57.9115	1.17334e-06	0.00169635	4.27065e-12	4.00163e-12	0.1	0.310247	0.00154837	0.87831	0.971716	0.0213116	0.00118867		61.9262	70.3162	63.7906	100.946	104.542	93.3554
ENSG00000243147	MRPL33	PC	mitochondrial ribosomal protein L33		Mammalian mitochondrial ribosomal proteins are encoded by nuclear genes and help in protein synthesis within the mitochondrion. Mitochondrial ribosomes (mitoribosomes) consist of a small 28S subunit and a large 39S subunit. They have an estimated 75% protein to rRNA composition compared to prokaryotic ribosomes, where this ratio is reversed. Another difference between mammalian mitoribosomes and …	hsa03010 (Ribosome), GO:0070125 (mitochondrial translational elongation), GO:0070126 (mitochondrial translational termination), GO:0005743 (mitochondrial inner membrane), GO:0005762 (mitochondrial large ribosomal subunit), GO:0003735 (structural constituent of ribosome), R-HSA-1852241 (Homo sapiens: Organelle biogenesis and maintenance), R-HSA-5368286 (Homo sapiens: Mitochondrial translation init…		-0.209868	-0.381128	-0.240127		0.447055	0.174632	0.209436				449.388	92.6855	3.84782	0.562734	7.7174	54.8442	1.64813e-06	0.00209208	2.65766e-11	2.62306e-11	0.1	0.310247	0.0221647	0.87831	0.925439	0.0213116	0.00813182		177.655	157.545	173.926	281.265	232.523	238.249
ENSG00000079819	EPB41L2	PC	erythrocyte membrane protein band 4.1 like 2			GO:0030866 (cortical actin cytoskeleton organization), GO:0031032 (actomyosin structure organization), GO:0005634 (nucleus), GO:0005654 (nucleoplasm), GO:0005829 (cytosol), GO:0005886 (plasma membrane), GO:0005925 (focal adhesion), GO:0008091 (spectrin), GO:0008180 (COP9 signalosome), GO:0019898 (extrinsic component of membrane), GO:0030054 (cell junction), GO:0070062 (extracellular vesicular exo…		-0.257904	-0.190291	-0.268959		0.294699	0.138521	0.283933				441.342	88.9244	76.2819	0.486046	7.19402	53.4301	1.93747e-06	0.00209208	8.03985e-11	7.91793e-11	0.1	0.310247	0.00816038	0.87831	0.968356	0.0213116	0.00148621		120.123	125.983	119.191	177.122	158.744	175.79
ENSG00000073921	PICALM	PC	phosphatidylinositol binding clathrin assembly protein		This gene encodes a clathrin assembly protein, which recruits clathrin and adaptor protein complex 2 (AP2) to cell membranes at sites of coated-pit formation and clathrin-vesicle assembly. The protein may be required to determine the amount of membrane to be recycled, possibly by regulating the size of the clathrin cage. The protein is involved in AP2-dependent clathrin-mediated endocytosis at th…	GO:0006461 (protein complex assembly), GO:0006898 (receptor-mediated endocytosis), GO:0007409 (axonogenesis), GO:0008283 (cell proliferation), GO:0010629 (negative regulation of gene expression), GO:0016188 (synaptic vesicle maturation), GO:0016192 (vesicle-mediated transport), GO:0016197 (endosomal transport), GO:0030097 (hemopoiesis), GO:0030100 (regulation of endocytosis), GO:0031623 (receptor…		-0.328645	-0.277931	-0.260595		0.339049	0.404167	0.123954				439.683	82.9673	35.3394	0.595412	6.55219	53.14	2.00367e-06	0.00209208	3.55122e-11	3.4095e-11	0.1	0.310247	0.0258334	0.87831	0.944094	0.0213116	0.00460089		72.447	75.1104	76.0427	116.261	121.722	99.8809
ENSG00000163634	THOC7	PC	THO complex 7			hsa03013 (RNA transport), GO:0006369 (termination of RNA polymerase II transcription), GO:0006405 (RNA export from nucleus), GO:0006406 (mRNA export from nucleus), GO:0008380 (RNA splicing), GO:0031124 (mRNA 3'-end processing), GO:0046784 (viral mRNA export from host cell nucleus), GO:0000346 (transcription export complex), GO:0000347 (THO complex), GO:0000445 (THO complex part of transcription e…		-0.274386	-0.324139	-0.208971		0.405606	0.310997	0.0908928				431.876	91.3453	8.70731	0.549554	7.51153	51.7826	2.34935e-06	0.00209208	8.6296e-11	8.52393e-11	0.1	0.310247	0.0318742	0.87831	0.923544	0.0213116	0.00854492		147.291	142.23	154.216	237.184	222.002	190.306
ENSG00000100442	FKBP3	PC	FK506 binding protein 3		The protein encoded by this gene is a member of the immunophilin protein family, which play a role in immunoregulation and basic cellular processes involving protein folding and trafficking. This encoded protein is a cis-trans prolyl isomerase that binds the immunosuppressants FK506 and rapamycin, as well as histone deacetylases, the transcription factor YY1, casein kinase II, and nucleolin. It h…	GO:0000413 (protein peptidyl-prolyl isomerization), GO:0061077 (chaperone-mediated protein folding), GO:0005634 (nucleus), GO:0005737 (cytoplasm), GO:0003723 (RNA binding), GO:0003755 (peptidyl-prolyl cis-trans isomerase activity), GO:0004872 (receptor activity), GO:0005515 (protein binding), GO:0005528 (FK506 binding)		-0.245892	-0.27048	-0.206163		0.375696	0.230872	0.115967				431.832	92.9103	29.6325	0.489907	7.75865	51.775	2.35146e-06	0.00209208	1.79232e-10	1.78151e-10	0.1	0.310247	0.0287385	0.87831	0.93729	0.0213116	0.00577559		179.253	176.19	184.314	276.87	250.235	230.925
ENSG00000142173	COL6A2	PC	collagen type VI alpha 2 chain		This gene encodes one of the three alpha chains of type VI collagen, a beaded filament collagen found in most connective tissues. The product of this gene contains several domains similar to von Willebrand Factor type A domains. These domains have been shown to bind extracellular matrix proteins, an interaction that explains the importance of this collagen in organizing matrix components. Mutatio…	hsa04151 (PI3K-Akt signaling pathway), hsa04510 (Focal adhesion), hsa04512 (ECM-receptor interaction), hsa04974 (Protein digestion and absorption), hsa05165 (Human papillomavirus infection), GO:0007155 (cell adhesion), GO:0009749 (response to glucose), GO:0030198 (extracellular matrix organization), GO:0030574 (collagen catabolic process), GO:0070208 (protein heterotrimerization), GO:0005576 (ext…		0.489472	0.177537	0.329535		-0.390913	-0.206498	-0.399133				419.426	75.0648	73.7484	-0.689602	5.94418	49.6423	3.03998e-06	0.00237207	8.33793e-11	7.81247e-11	0.1	0.310247	0.0150955	-0.87831	-0.938	0.0213116	0.00564679		84.2995	67.5195	75.2436	44.8798	51.2722	44.6135
ENSG00000122026	RPL21	PC	ribosomal protein L21		Ribosomes, the organelles that catalyze protein synthesis, consist of a small 40S subunit and a large 60S subunit. Together these subunits are composed of 4 RNA species and approximately 80 structurally distinct proteins. This gene encodes a ribosomal protein that is a component of the 60S subunit. The protein belongs to the L21E family of ribosomal proteins. It is located in the cytoplasm. As is…	hsa03010 (Ribosome), GO:0000184 (nuclear-transcribed mRNA catabolic process, nonsense-mediated decay), GO:0006364 (rRNA processing), GO:0006412 (translation), GO:0006413 (translational initiation), GO:0006614 (SRP-dependent cotranslational protein targeting to membrane), GO:0019083 (viral transcription), GO:0005829 (cytosol), GO:0016020 (membrane), GO:0022625 (cytosolic large ribosomal subunit), …		-0.20081	-0.3521	-0.280994		0.486711	0.109322	0.23787				418.857	98.729	7.70428	0.564425	9.88861	49.5452	3.07634e-06	0.00237207	1.5984e-09	1.61457e-09	0.1	0.310247	0.0459725	0.87831	0.894504	0.0213116	0.0161069		805.972	725.535	762.291	1299.25	999.741	1093.1
ENSG00000150316	CWC15	PC	CWC15 spliceosome associated protein homolog			hsa03040 (Spliceosome), GO:0000398 (mRNA splicing, via spliceosome), GO:0005634 (nucleus), GO:0005654 (nucleoplasm), GO:0005681 (spliceosomal complex), GO:0005739 (mitochondrion), GO:0016607 (nuclear speck), GO:0071013 (catalytic step 2 spliceosome), GO:0003723 (RNA binding), GO:0005515 (protein binding), R-HSA-72163 (Homo sapiens: mRNA Splicing - Major Pathway), R-HSA-72172 (Homo sapiens: mRNA S…		-0.128477	-0.25972	-0.320993		0.356819	0.184053	0.168317				410.365	93.6365	22.2827	0.477094	7.9045	48.1038	3.6784e-06	0.00265902	7.25889e-10	7.24997e-10	0.1	0.310247	0.00808111	0.87831	0.938562	0.0213116	0.00554591		215.476	196.566	188.309	302.439	268.08	265.151
ENSG00000122786	CALD1	PC	caldesmon 1		This gene encodes a calmodulin- and actin-binding protein that plays an essential role in the regulation of smooth muscle and nonmuscle contraction. The conserved domain of this protein possesses the binding activities to Ca(2+)-calmodulin, actin, tropomyosin, myosin, and phospholipids. This protein is a potent inhibitor of the actin-tropomyosin activated myosin MgATPase, and serves as a mediatin…	hsa04270 (Vascular smooth muscle contraction), GO:0006928 (cellular component movement), GO:0006936 (muscle contraction), GO:0005829 (cytosol), GO:0005856 (cytoskeleton), GO:0005886 (plasma membrane), GO:0015629 (actin cytoskeleton), GO:0030016 (myofibril), GO:0030478 (actin cap), GO:0043231 (intracellular membrane-bounded organelle), GO:0003779 (actin binding), GO:0005515 (protein binding), GO:0…		-0.175639	-0.220727	-0.25633		0.319377	0.241969	0.0913507				407.459	94.5962	59.8098	0.441036	8.10599	47.6138	3.91255e-06	0.00266191	1.53263e-09	1.53513e-09	0.1	0.310247	0.0233203	0.87831	0.940376	0.0213116	0.00522659		240.38	232.922	227.196	339.595	321.75	289.655
ENSG00000177917	ARL6IP6	PC	ADP ribosylation factor like GTPase 6 interacting protein 6			GO:0016021 (integral component of membrane)		-0.632745	-0.673366	-0.75821		1.02973	0.883365	0.151226				400.409	21.1655	41.9282	1.98089	2.75909	46.4319	4.5496e-06	0.0028689	1.09457e-10	1.59981e-10	0.1	0.310247	0.0658942	0.87831	0.878687	0.0213116	0.0211825		2.79667	2.66349	2.39714	13.1843	11.7194	6.2592
ENSG00000143401	ANP32E	PC	acidic nuclear phosphoprotein 32 family member E			GO:0016569 (covalent chromatin modification), GO:0043086 (negative regulation of catalytic activity), GO:0043486 (histone exchange), GO:0000812 (Swr1 complex), GO:0005634 (nucleus), GO:0031410 (cytoplasmic vesicle), GO:0019212 (phosphatase inhibitor activity), GO:0042393 (histone binding)		-0.391141	-0.453196	-0.274507		0.554638	0.365377	0.198829				396.803	61.2831	54.8465	0.799557	5.03097	45.8313	4.9177e-06	0.0028689	5.21781e-10	5.89059e-10	0.1	0.310247	0.0219177	0.87831	0.938571	0.0213116	0.00554444		23.3055	22.2402	25.4363	46.7443	40.7514	36.0903
ENSG00000140961	OSGIN1	PC	oxidative stress induced growth inhibitor 1		This gene encodes an oxidative stress response protein that regulates cell death. Expression of the gene is regulated by p53 and is induced by DNA damage. The protein regulates apoptosis by inducing cytochrome c release from mitochondria. It also appears to be a key regulator of both inflammatory and anti-inflammatory molecules. The loss of this protein correlates with uncontrolled cell growth an…	GO:0007275 (multicellular organismal development), GO:0030154 (cell differentiation), GO:0030308 (negative regulation of cell growth), GO:0043065 (positive regulation of apoptotic process), GO:0055114 (oxidation-reduction process), GO:0005575 (cellular_component), GO:0005515 (protein binding), GO:0008083 (growth factor activity), GO:0016491 (oxidoreductase activity)		0.506507	0.506507	0.473344		-0.560394	-0.270961	-0.655003				396.36	34.368	41.0376	-1.1742	3.51205	45.2831	5.28316e-06	0.0028689	3.28878e-10	4.22532e-10	0.0765225	0.310247	0.00572264	-0.891133	-0.985597	0.017133	0.000309663		15.5814	15.5814	15.1819	6.39238	8.25682	5.85968
ENSG00000117519	CNN3	PC	calponin 3		This gene encodes a protein with a markedly acidic C terminus; the basic N-terminus is highly homologous to the N-terminus of a related gene, CNN1. Members of the CNN gene family all contain similar tandemly repeated motifs. This encoded protein is associated with the cytoskeleton but is not involved in contraction. [provided by RefSeq, Jul 2008].	GO:0030855 (epithelial cell differentiation), GO:0031032 (actomyosin structure organization), GO:0032780 (negative regulation of ATPase activity), GO:0098609 (cell-cell adhesion), GO:0005829 (cytosol), GO:0005913 (cell-cell adherens junction), GO:0005925 (focal adhesion), GO:0014069 (postsynaptic density), GO:0015629 (actin cytoskeleton), GO:0043025 (neuronal cell body), GO:0043197 (dendritic spi…		-0.246655	-0.11377	-0.271762		0.216204	0.280944	0.13504				393.985	93.9478	39.0229	0.424422	7.95674	45.3637	5.22755e-06	0.0028689	3.35455e-09	3.36387e-09	0.1	0.310247	0.00303698	0.87831	0.955846	0.0213116	0.00288127		206.421	226.53	202.825	285.26	298.444	269.545
ENSG00000132485	ZRANB2	PC	zinc finger RANBP2-type containing 2			GO:0006355 (regulation of transcription, DNA-templated), GO:0006397 (mRNA processing), GO:0008380 (RNA splicing), GO:0005634 (nucleus), GO:0005654 (nucleoplasm), GO:0003700 (sequence-specific DNA binding transcription factor activity), GO:0003723 (RNA binding), GO:0005515 (protein binding), GO:0008270 (zinc ion binding)		-0.537203	-0.420707	-0.267483		0.469402	0.442311	0.31368				392.011	48.8587	65.3524	0.901993	4.30894	45.0371	5.45701e-06	0.0028689	8.12718e-10	9.63394e-10	0.1	0.310247	0.000677952	0.87831	0.978837	0.0213116	0.000667095		12.2521	13.4506	15.1819	26.6349	26.1022	23.7051
ENSG00000134375	TIMM17A	PC	translocase of inner mitochondrial membrane 17A			GO:0006626 (protein targeting to mitochondrion), GO:0030150 (protein import into mitochondrial matrix), GO:0005654 (nucleoplasm), GO:0005739 (mitochondrion), GO:0005743 (mitochondrial inner membrane), GO:0005744 (mitochondrial inner membrane presequence translocase complex), GO:0031305 (integral component of mitochondrial inner membrane), GO:0015266 (protein channel activity), GO:0015450 (P-P-bon…		-0.582818	-0.482145	-0.328551		0.671318	0.451374	0.270822				387.684	42.9189	49.1051	1.06427	3.98013	44.3239	5.99881e-06	0.00299851	1.08212e-09	1.30943e-09	0.1	0.310247	0.0189625	0.87831	0.941891	0.0213116	0.00496689		9.05587	9.85492	11.1867	24.3709	20.6421	17.9786
ENSG00000169504	CLIC4	PC	chloride intracellular channel 4		Chloride channels are a diverse group of proteins that regulate fundamental cellular processes including stabilization of cell membrane potential, transepithelial transport, maintenance of intracellular pH, and regulation of cell volume. Chloride intracellular channel 4 (CLIC4) protein, encoded by the CLIC4 gene, is a member of the p64 family; the gene is expressed in many tissues and exhibits a …	GO:0001525 (angiogenesis), GO:0001886 (endothelial cell morphogenesis), GO:0006821 (chloride transport), GO:0007035 (vacuolar acidification), GO:0009566 (fertilization), GO:0030154 (cell differentiation), GO:0030216 (keratinocyte differentiation), GO:0030336 (negative regulation of cell migration), GO:0034765 (regulation of ion transmembrane transport), GO:0035088 (establishment or maintenance of…		-0.561658	-0.276949	-0.460382		0.71761	0.489812	0.0915681				383.583	68.0183	74.4228	0.926628	5.45917	43.6513	6.56583e-06	0.00299851	3.65056e-10	4.02403e-10	0.1	0.310247	0.0566449	0.87831	0.875387	0.0213116	0.0223251		27.3008	33.6932	29.4316	69.1176	58.73	44.0808
ENSG00000106355	LSM5	PC	LSM5 homolog, U6 small nuclear RNA and mRNA degradation associated		Sm-like proteins were identified in a variety of organisms based on sequence homology with the Sm protein family (see SNRPD2; MIM 601061). Sm-like proteins contain the Sm sequence motif, which consists of 2 regions separated by a linker of variable length that folds as a loop. The Sm-like proteins are thought to form a stable heteromer present in tri-snRNP particles, which are important for pre-m…	hsa03018 (RNA degradation), hsa03040 (Spliceosome), GO:0000398 (mRNA splicing, via spliceosome), GO:0000956 (nuclear-transcribed mRNA catabolic process), GO:0006397 (mRNA processing), GO:0043928 (exonucleolytic nuclear-transcribed mRNA catabolic process involved in deadenylation-dependent decay), GO:0005634 (nucleus), GO:0005654 (nucleoplasm), GO:0005681 (spliceosomal complex), GO:0005688 (U6 snR…		-0.276706	-0.33188	-0.312328		0.490241	0.370918	0.0597553				381.995	81.5061	22.0493	0.63974	6.43679	43.3917	6.80069e-06	0.00299851	1.12056e-09	1.09439e-09	0.1	0.310247	0.0539551	0.87831	0.897719	0.0213116	0.015157		68.9844	66.3209	67.2531	118.792	109.203	87.6289
ENSG00000167996	FTH1	PC	ferritin heavy chain 1		This gene encodes the heavy subunit of ferritin, the major intracellular iron storage protein in prokaryotes and eukaryotes. It is composed of 24 subunits of the heavy and light ferritin chains. Variation in ferritin subunit composition may affect the rates of iron uptake and release in different tissues. A major function of ferritin is the storage of iron in a soluble and nontoxic state. Defects…	hsa04216 (Ferroptosis), hsa04217 (Necroptosis), hsa04978 (Mineral absorption), GO:0006879 (cellular iron ion homeostasis), GO:0006880 (intracellular sequestering of iron ion), GO:0006955 (immune response), GO:0008285 (negative regulation of cell proliferation), GO:0043312 (neutrophil degranulation), GO:0048147 (negative regulation of fibroblast proliferation), GO:0055114 (oxidation-reduction proc…		0.283275	0.263437	0.321023		-0.526745	-0.0526858	-0.288304				381.539	98.1843	12.313	-0.567395	9.44228	43.3173	6.86967e-06	0.00299851	5.60451e-09	5.66085e-09	0.1	0.310247	0.0330167	-0.87831	-0.928412	0.0213116	0.00750374		826.881	815.561	848.855	470.772	654.686	555.737
ENSG00000151012	SLC7A11	PC	solute carrier family 7 member 11		This gene encodes a member of a heteromeric, sodium-independent, anionic amino acid transport system that is highly specific for cysteine and glutamate. In this system, designated Xc(-), the anionic form of cysteine is transported in exchange for glutamate. This protein has been identified as the predominant mediator of Kaposi sarcoma-associated herpesvirus fusion and entry permissiveness into ce…	hsa04216 (Ferroptosis), GO:0006865 (amino acid transport), GO:0006979 (response to oxidative stress), GO:0007420 (brain development), GO:0009636 (response to toxic substance), GO:0035094 (response to nicotine), GO:0050900 (leukocyte migration), GO:0070306 (lens fiber cell differentiation), GO:0070527 (platelet aggregation), GO:0089711 (L-glutamate transmembrane transport), GO:0005791 (rough endop…		0.414793	0.333558	0.27979		-0.484775	-0.35861	-0.184756				380.693	62.1131	98.4695	-0.722933	5.08669	43.1793	6.99982e-06	0.00299851	1.35445e-09	1.52352e-09	0.1	0.310247	0.00189865	-0.87831	-0.970588	0.0213116	0.00128491		44.214	41.6836	40.0855	22.7728	25.0368	28.4994
ENSG00000142871	CYR61	PC	cysteine rich angiogenic inducer 61		The secreted protein encoded by this gene is growth factor-inducible and promotes the adhesion of endothelial cells. The encoded protein interacts with several integrins and with heparan sulfate proteoglycan. This protein also plays a role in cell proliferation, differentiation, angiogenesis, apoptosis, and extracellular matrix formation. [provided by RefSeq, Sep 2011]. Publication Note: This Ref…	GO:0001558 (regulation of cell growth), GO:0001649 (osteoblast differentiation), GO:0001934 (positive regulation of protein phosphorylation), GO:0002041 (intussusceptive angiogenesis), GO:0003181 (atrioventricular valve morphogenesis), GO:0003278 (apoptotic process involved in heart morphogenesis), GO:0003281 (ventricular septum development), GO:0006935 (chemotaxis), GO:0008283 (cell proliferatio…		-0.14818	-0.28117	-0.248406		0.379281	0.153516	0.144959				375.56	99.4639	49.4336	0.455384	10.8016	42.3453	7.84829e-06	0.00303747	2.83077e-07	2.8556e-07	0.1	0.310247	0.0266395	0.87831	0.918497	0.0213116	0.00969335		1587.44	1447.47	1480.77	2289	1957.13	1945.55
ENSG00000108448	TRIM16L	PC	tripartite motif containing 16 like			GO:0005829 (cytosol), GO:0005886 (plasma membrane)		0.525914	0.320456	0.250071		-0.504109	-0.371367	-0.220965				375.019	59.9516	29.7795	-0.780964	4.9421	42.2576	7.94406e-06	0.00303747	2.01022e-09	2.27051e-09	0.1	0.310247	0.00803658	-0.87831	-0.94653	0.0213116	0.00421217		43.1486	37.1557	35.2913	20.1094	22.2402	24.9036
ENSG00000125148	MT2A	PC	metallothionein 2A			hsa04978 (Mineral absorption), GO:0006878 (cellular copper ion homeostasis), GO:0010038 (response to metal ion), GO:0035690 (cellular response to drug), GO:0036016 (cellular response to interleukin-3), GO:0036018 (cellular response to erythropoietin), GO:0045926 (negative regulation of growth), GO:0060333 (interferon-gamma-mediated signaling pathway), GO:0071294 (cellular response to zinc ion), G…		0.0961411	0.276834	0.268347		-0.241975	-0.104157	-0.295191				374.026	98.4351	8.82836	-0.428734	9.63547	42.097	8.12287e-06	0.00303747	6.27494e-08	6.32166e-08	0.1	0.310247	0.00832719	-0.87831	-0.932248	0.0213116	0.00673002		839.399	951.665	946.072	663.609	730.329	639.504
ENSG00000123219	CENPK	PC	centromere protein K		CENPK is a subunit of a CENPH (MIM 605607)-CENPI (MIM 300065)-associated centromeric complex that targets CENPA (MIM 117139) to centromeres and is required for proper kinetochore function and mitotic progression (Okada et al., 2006 [PubMed 16622420]).[supplied by OMIM, Mar 2008].	GO:0007062 (sister chromatid cohesion), GO:0034080 (CENP-A containing nucleosome assembly), GO:0000777 (condensed chromosome kinetochore), GO:0005654 (nucleoplasm), GO:0005829 (cytosol), GO:0005515 (protein binding), R-HSA-162582 (Homo sapiens: Signal Transduction), R-HSA-1640170 (Homo sapiens: Cell Cycle), R-HSA-194315 (Homo sapiens: Signaling by Rho GTPases), R-HSA-195258 (Homo sapiens: RHO GTP…		-0.339162	-0.185504	-0.270163		0.293482	0.207865	0.293482				373.845	73.8458	18.824	0.547758	5.85183	41.6322	8.66648e-06	0.00303747	4.52656e-09	4.44562e-09	0.0765225	0.310247	0.000469364	0.891133	0.982615	0.017133	0.000450754		44.214	49.4078	46.4779	69.6503	65.5219	69.6503
ENSG00000281453	TGFB2-OT1	3prime_overlapping_ncRNA	TGFB2 overlapping transcript 1					-0.180841	-0.509055	-0.349709		0.395684	0.496154	0.147766				373.207	71.7015	46.6494	0.721876	5.69934	41.9646	8.2737e-06	0.00303747	1.32846e-09	1.44585e-09	0.1	0.310247	0.0154008	0.87831	0.920866	0.0213116	0.00914552		43.8144	34.4922	38.7538	66.3209	71.2484	55.5338
ENSG00000215301	DDX3X	PC	DEAD-box helicase 3 X-linked		The protein encoded by this gene is a member of the large DEAD-box protein family, that is defined by the presence of the conserved Asp-Glu-Ala-Asp (DEAD) motif, and has ATP-dependent RNA helicase activity. This protein has been reported to display a high level of RNA-independent ATPase activity, and unlike most DEAD-box helicases, the ATPase activity is thought to be stimulated by both RNA and D…	hsa04622 (RIG-I-like receptor signaling pathway), hsa05161 (Hepatitis B), hsa05203 (Viral carcinogenesis), GO:0006351 (transcription, DNA-templated), GO:0007059 (chromosome segregation), GO:0008625 (extrinsic apoptotic signaling pathway via death domain receptors), GO:0009615 (response to virus), GO:0010501 (RNA secondary structure unwinding), GO:0010628 (positive regulation of gene expression), …		-0.367021	-0.300221	-0.306763		0.5284	0.391635	0.053971				372.27	78.6011	78.677	0.681201	6.1903	41.8134	8.44984e-06	0.00303747	1.75821e-09	1.70887e-09	0.1	0.310247	0.0583798	0.87831	0.889306	0.0213116	0.0177017		54.202	56.8655	56.5992	102.544	93.089	73.246
ENSG00000113356	POLR3G	PC	RNA polymerase III subunit G			hsa01100 (Metabolic pathways), hsa03020 (RNA polymerase), hsa04623 (Cytosolic DNA-sensing pathway), GO:0006359 (regulation of transcription from RNA polymerase III promoter), GO:0006383 (transcription from RNA polymerase III promoter), GO:0008283 (cell proliferation), GO:0032481 (positive regulation of type I interferon production), GO:0032728 (positive regulation of interferon-beta production), …		-0.228759	-0.375936	-0.36529		0.527343	0.237213	0.205428				367.077	69.0645	45.6723	0.681662	5.53226	40.9783	9.50209e-06	0.00323239	3.73896e-09	4.09083e-09	0.1	0.310247	0.0302052	0.87831	0.922274	0.0213116	0.00882728		37.8216	33.9595	34.2259	65.2555	53.0035	51.8049
ENSG00000088247	KHSRP	PC	KH-type splicing regulatory protein		The KHSRP gene encodes a multifunctional RNA-binding protein implicated in a variety of cellular processes, including transcription, alternative pre-mRNA splicing, and mRNA localization (Min et al., 1997 [PubMed 9136930]; Gherzi et al., 2004 [PubMed 15175153]).[supplied by OMIM, Apr 2010]. Publication Note: This RefSeq record includes a subset of the publications that are available for this gene.…	GO:0000375 (RNA splicing, via transesterification reactions), GO:0006351 (transcription, DNA-templated), GO:0006355 (regulation of transcription, DNA-templated), GO:0006397 (mRNA processing), GO:0006402 (mRNA catabolic process), GO:0008380 (RNA splicing), GO:0010586 (miRNA metabolic process), GO:0043488 (regulation of mRNA stability), GO:0045019 (negative regulation of nitric oxide biosynthetic p…		-0.183155	-0.189581	-0.176757		0.265155	0.157155	0.127182				363.92	93.6019	23.3204	0.370639	7.89754	40.4734	1.02096e-05	0.00330946	3.24759e-08	3.27225e-08	0.1	0.310247	0.0162822	0.87831	0.967396	0.0213116	0.00157717		207.752	206.82	208.685	284.194	263.552	258.092
ENSG00000186298	PPP1CC	PC	protein phosphatase 1 catalytic subunit gamma		The protein encoded by this gene belongs to the protein phosphatase family, PP1 subfamily. PP1 is an ubiquitous serine/threonine phosphatase that regulates many cellular processes, including cell division. It is expressed in mammalian cells as three closely related isoforms, alpha, beta/delta and gamma, which have distinct localization patterns. This gene encodes the gamma isozyme. Alternatively …	hsa03015 (mRNA surveillance pathway), hsa04022 (cGMP-PKG signaling pathway), hsa04024 (cAMP signaling pathway), hsa04114 (Oocyte meiosis), hsa04218 (Cellular senescence), hsa04261 (Adrenergic signaling in cardiomyocytes), hsa04270 (Vascular smooth muscle contraction), hsa04390 (Hippo signaling pathway), hsa04510 (Focal adhesion), hsa04611 (Platelet activation), hsa04720 (Long-term potentiation), …		-0.414485	-0.197899	-0.332718		0.558756	0.246326	0.14002				363.53	80.8836	51.5521	0.654297	6.37293	40.4112	1.03009e-05	0.00330946	3.15909e-09	3.09964e-09	0.1	0.310247	0.0467623	0.87831	0.885204	0.0213116	0.0190109		59.6622	69.6503	63.2579	119.058	95.4862	88.5611
ENSG00000254999	BRK1	PC	BRICK1, SCAR/WAVE actin nucleating complex subunit			hsa04810 (Regulation of actin cytoskeleton), GO:0001701 (in utero embryonic development), GO:0007015 (actin filament organization), GO:0008284 (positive regulation of cell proliferation), GO:0010592 (positive regulation of lamellipodium assembly), GO:0016601 (Rac protein signal transduction), GO:0038096 (Fc-gamma receptor signaling pathway involved in phagocytosis), GO:0048010 (vascular endotheli…		-0.157702	-0.165272	-0.17011		0.178157	0.178701	0.136225				362.086	95.383	38.5128	0.330957	8.28809	40.1809	1.06467e-05	0.00332809	6.45259e-08	6.50727e-08	0.1	0.310247	0.00158458	0.87831	0.995309	0.0213116	3.29564e-05		277.935	276.47	275.538	351.314	351.448	341.193
ENSG00000121774	KHDRBS1	PC	KH RNA binding domain containing, signal transduction associated 1		This gene encodes a member of the K homology domain-containing, RNA-binding, signal transduction-associated protein family. The encoded protein appears to have many functions and may be involved in a variety of cellular processes, including alternative splicing, cell cycle regulation, RNA 3_-end formation, tumorigenesis, and regulation of human immunodeficiency virus gene expression. Alternative …	GO:0000086 (G2/M transition of mitotic cell cycle), GO:0006351 (transcription, DNA-templated), GO:0006397 (mRNA processing), GO:0007050 (cell cycle arrest), GO:0007165 (signal transduction), GO:0007166 (cell surface receptor signaling pathway), GO:0008283 (cell proliferation), GO:0009967 (positive regulation of signal transduction), GO:0045892 (negative regulation of transcription, DNA-templated)…		-0.245787	-0.289697	-0.183808		0.41928	0.173485	0.126527				359.148	89.0974	77.9161	0.491311	7.2112	39.7139	1.13889e-05	0.00335408	1.17229e-08	1.17387e-08	0.1	0.310247	0.04135	0.87831	0.906734	0.0213116	0.0126423		122.387	118.659	127.848	195.234	164.337	159.01
ENSG00000109180	OCIAD1	PC	OCIA domain containing 1			GO:0005739 (mitochondrion), GO:0005768 (endosome), GO:0016020 (membrane), GO:0005515 (protein binding)		-0.244914	-0.219492	-0.169954		0.251149	0.238975	0.144236				358.082	84.6706	17.4233	0.431414	6.72771	39.5449	1.16718e-05	0.00335408	1.91879e-08	1.92846e-08	0.1	0.310247	0.0024958	0.87831	0.980002	0.0213116	0.000595878		87.8952	89.4933	92.6895	124.785	123.719	115.729
ENSG00000100632	ERH	PC	ERH, mRNA splicing and mitosis factor			GO:0006139 (nucleobase-containing compound metabolic process), GO:0006213 (pyrimidine nucleoside metabolic process), GO:0006221 (pyrimidine nucleotide biosynthetic process), GO:0007049 (cell cycle), GO:0045747 (positive regulation of Notch signaling pathway), GO:0030496 (midbody), GO:0034709 (methylosome), GO:0003723 (RNA binding), GO:0005515 (protein binding), GO:0008327 (methyl-CpG binding)		-0.169	-0.295079	-0.162376		0.325021	0.234824	0.0666098				357.563	96.1439	7.42758	0.422642	8.49414	39.4627	1.18123e-05	0.00335408	3.79408e-08	3.81963e-08	0.1	0.310247	0.0256177	0.87831	0.913604	0.0213116	0.0108739		316.29	289.655	317.754	446.268	419.1	372.756
ENSG00000196924	FLNA	PC	filamin A		The protein encoded by this gene is an actin-binding protein that crosslinks actin filaments and links actin filaments to membrane glycoproteins. The encoded protein is involved in remodeling the cytoskeleton to effect changes in cell shape and migration. This protein interacts with integrins, transmembrane receptor complexes, and second messengers. Defects in this gene are a cause of several syn…	hsa04010 (MAPK signaling pathway), hsa04510 (Focal adhesion), hsa05132 (Salmonella infection), hsa05205 (Proteoglycans in cancer), GO:0002576 (platelet degranulation), GO:0007195 (adenylate cyclase-inhibiting dopamine receptor signaling pathway), GO:0016479 (negative regulation of transcription from RNA polymerase I promoter), GO:0021943 (formation of radial glial scaffolds), GO:0021987 (cerebral…		0.206636	0.378911	0.309042		-0.58507	-0.147838	-0.16168				357.279	99.4726	94.5958	-0.585017	10.8056	39.4178	1.18898e-05	0.00335408	9.19864e-08	9.32478e-08	0.1	0.310247	0.0173527	-0.87831	-0.918674	0.0213116	0.00965203		2012.93	2268.5	2161.16	1161.95	1573.99	1558.94
ENSG00000103018	CYB5B	PC	cytochrome b5 type B			GO:0006805 (xenobiotic metabolic process), GO:0055114 (oxidation-reduction process), GO:0005741 (mitochondrial outer membrane), GO:0016020 (membrane), GO:0016021 (integral component of membrane), GO:0005515 (protein binding), GO:0020037 (heme binding), GO:0046872 (metal ion binding), R-HSA-1430728 (Homo sapiens: Metabolism), R-HSA-211859 (Homo sapiens: Biological oxidations), R-HSA-211945 (Homo s…		-0.131216	-0.272021	-0.297707		0.383901	0.224614	0.0924293				355.757	91.916	76.6018	0.475289	7.58974	39.1771	1.23151e-05	0.00339134	1.6719e-08	1.67855e-08	0.1	0.310247	0.0265849	0.87831	0.907887	0.0213116	0.0123364		172.727	156.48	153.683	247.705	221.602	202.026
ENSG00000170515	PA2G4	PC	proliferation-associated 2G4		This gene encodes an RNA-binding protein that is involved in growth regulation. This protein is present in pre-ribosomal ribonucleoprotein complexes and may be involved in ribosome assembly and the regulation of intermediate and late steps of rRNA processing. This protein can interact with the cytoplasmic domain of the ErbB3 receptor and may contribute to transducing growth regulatory signals. Th…	GO:0006351 (transcription, DNA-templated), GO:0006364 (rRNA processing), GO:0006417 (regulation of translation), GO:0007050 (cell cycle arrest), GO:0008283 (cell proliferation), GO:0043066 (negative regulation of apoptotic process), GO:0043312 (neutrophil degranulation), GO:0045597 (positive regulation of cell differentiation), GO:0045892 (negative regulation of transcription, DNA-templated), GO:…		-0.165711	-0.261361	-0.180302		0.213491	0.162367	0.231516				353.637	86.2787	20.6226	0.411496	6.88553	38.8425	1.29353e-05	0.0034793	2.7741e-08	2.79473e-08	0.1	0.310247	0.000322653	0.87831	0.98554	0.0213116	0.000312106		103.876	97.0842	102.811	135.705	130.911	137.436
ENSG00000136982	DSCC1	PC	DNA replication and sister chromatid cohesion 1		CHTF18 (MIM 613201), CHTF8 (MIM 613202), and DSCC1 are components of an alternative replication factor C (RFC) (see MIM 600404) complex that loads PCNA (MIM 176740) onto DNA during S phase of the cell cycle (Merkle et al., 2003 [PubMed 12766176]; Bermudez et al., 2003 [PubMed 12930902]).[supplied by OMIM, Dec 2009].	GO:0006260 (DNA replication), GO:0006275 (regulation of DNA replication), GO:0034088 (maintenance of mitotic sister chromatid cohesion), GO:0034421 (post-translational protein acetylation), GO:1900264 (positive regulation of DNA-directed DNA polymerase activity), GO:0000775 (chromosome, centromeric region), GO:0000785 (chromatin), GO:0005654 (nucleoplasm), GO:0031390 (Ctf18 RFC-like complex), GO:…		-0.642817	-0.495612	-0.186699		0.709653	0.357076	0.258399				349.234	54.4527	54.0597	0.960412	4.63571	38.1509	1.43323e-05	0.00367088	5.97407e-09	6.80536e-09	0.1	0.310247	0.0252768	0.87831	0.90007	0.0213116	0.0144802		14.1165	15.8478	20.1094	39.1533	30.2306	28.0998
ENSG00000144566	RAB5A	PC	RAB5A, member RAS oncogene family			hsa04014 (Ras signaling pathway), hsa04144 (Endocytosis), hsa04145 (Phagosome), hsa04962 (Vasopressin-regulated water reabsorption), hsa05014 (Amyotrophic lateral sclerosis (ALS)), hsa05146 (Amoebiasis), hsa05152 (Tuberculosis), GO:0006661 (phosphatidylinositol biosynthetic process), GO:0006897 (endocytosis), GO:0006909 (phagocytosis), GO:0007596 (blood coagulation), GO:0015031 (protein transport…		-0.264704	-0.511122	-0.252831		0.534064	0.316244	0.178349				349.119	65.0182	31.9585	0.725858	5.25797	38.1329	1.43708e-05	0.00367088	9.63028e-09	1.06256e-08	0.1	0.310247	0.0197781	0.87831	0.920336	0.0213116	0.00926669		30.2306	25.17	30.497	54.0689	46.2116	41.8168
ENSG00000082898	XPO1	PC	exportin 1		The protein encoded by this gene mediates leucine-rich nuclear export signal (NES)-dependent protein transport. Exportin 1 specifically inhibits the nuclear export of Rev and U snRNAs. It is involved in the control of several cellular processes by controlling the localization of cyclin B, MPAK, and MAPKAP kinase 2. This protein also regulates NFAT and AP-1. [provided by RefSeq, Jul 2008]. Publica…	hsa03008 (Ribosome biogenesis in eukaryotes), hsa03013 (RNA transport), hsa05164 (Influenza A), hsa05166 (Human T-cell leukemia virus 1 infection), GO:0000054 (ribosomal subunit export from nucleus), GO:0000055 (ribosomal large subunit export from nucleus), GO:0000056 (ribosomal small subunit export from nucleus), GO:0000122 (negative regulation of transcription from RNA polymerase II promoter), …		-0.279719	-0.417217	-0.54036		0.782957	0.428931	0.0254091				348.444	80.4513	52.3822	0.876014	6.34011	38.0271	1.45997e-05	0.00367088	2.8307e-09	2.77213e-09	0.1	0.310247	0.0907053	0.87831	0.826848	0.0213116	0.0423765		62.4589	56.5992	51.8049	132.642	103.343	77.6408
ENSG00000044115	CTNNA1	PC	catenin alpha 1			hsa04390 (Hippo signaling pathway), hsa04520 (Adherens junction), hsa04670 (Leukocyte transendothelial migration), hsa05100 (Bacterial invasion of epithelial cells), hsa05200 (Pathways in cancer), hsa05213 (Endometrial cancer), hsa05226 (Gastric cancer), hsa05412 (Arrhythmogenic right ventricular cardiomyopathy (ARVC)), GO:0001541 (ovarian follicle development), GO:0007015 (actin filament organiz…		-0.159295	-0.313002	-0.168919		0.348832	0.188488	0.103897				345.771	93.161	20.0259	0.433237	7.81277	37.6095	1.5545e-05	0.00382539	4.52965e-08	4.55974e-08	0.1	0.310247	0.0205159	0.87831	0.916227	0.0213116	0.010233		198.297	178.054	196.965	282.863	252.898	238.382
ENSG00000224114	AL591846.1	p_Pg						-0.280744	-0.245861	-0.39076		0.369924	0.445045	0.102395				342.853	68.8051	2.5508	0.645416	5.51556	37.1554	1.66519e-05	0.0039095	1.9653e-08	2.14178e-08	0.1	0.310247	0.0304111	0.87831	0.923194	0.0213116	0.00862214		36.0903	37.0225	33.2936	57.7978	60.9939	47.6765
ENSG00000099901	RANBP1	PC	RAN binding protein 1		This gene encodes a protein that forms a complex with Ras-related nuclear protein (Ran) and metabolizes guanoside triphosphate (GTP). This complex participates in the regulation of the cell cycle by controlling transport of proteins and nucleic acids into the nucleus. There are multiple pseudogenes for this gene on chromosomes 9, 12, 17, and X. Alternative splicing results in multiple transcript …	hsa05166 (Human T-cell leukemia virus 1 infection), hsa05203 (Viral carcinogenesis), GO:0000082 (G1/S transition of mitotic cell cycle), GO:0006405 (RNA export from nucleus), GO:0006511 (ubiquitin-dependent protein catabolic process), GO:0006606 (protein import into nucleus), GO:0007051 (spindle organization), GO:0007165 (signal transduction), GO:0016032 (viral process), GO:0043547 (positive regu…		-0.161485	-0.280783	-0.196142		0.362469	0.212964	0.0629768				342.597	98.8587	21.1154	0.430754	10.0149	37.1157	1.67528e-05	0.0039095	4.40072e-07	4.43672e-07	0.1	0.310247	0.0404259	0.87831	0.899701	0.0213116	0.0145852		912.512	839.932	890.805	1312.97	1183.52	1066.46
ENSG00000147669	POLR2K	PC	RNA polymerase II subunit K		This gene encodes one of the smallest subunits of RNA polymerase II, the polymerase responsible for synthesizing messenger RNA in eukaryotes. This subunit is shared by the other two DNA-directed RNA polymerases. [provided by RefSeq, Jul 2008]. Publication Note: This RefSeq record includes a subset of the publications that are available for this gene. Please see the Gene record to access additiona…	hsa01100 (Metabolic pathways), hsa03020 (RNA polymerase), hsa04623 (Cytosolic DNA-sensing pathway), hsa05016 (Huntington disease), GO:0000398 (mRNA splicing, via spliceosome), GO:0006283 (transcription-coupled nucleotide-excision repair), GO:0006356 (regulation of transcription from RNA polymerase I promoter), GO:0006361 (transcription initiation from RNA polymerase I promoter), GO:0006362 (trans…		-0.265477	-0.222306	-0.154188		0.329375	0.200783	0.111814				342.226	87.861	15.6161	0.436616	7.04049	37.058	1.69008e-05	0.0039095	4.51552e-08	4.54519e-08	0.1	0.310247	0.0178327	0.87831	0.939221	0.0213116	0.00542884		107.605	110.934	116.395	163.538	149.422	140.366
ENSG00000105887	MTPN	PC	myotrophin		The transcript produced from this gene is bi-cistronic and can encode both myotrophin and leucine zipper protein 6. The myotrophin protein is associated with cardiac hypertrophy, where it is involved in the conversion of NFkappa B p50-p65 heterodimers to p50-p50 and p65-p65 homodimers. This protein also has a potential function in cerebellar morphogenesis, and it may be involved in the differenti…	GO:0006417 (regulation of translation), GO:0006584 (catecholamine metabolic process), GO:0010557 (positive regulation of macromolecule biosynthetic process), GO:0010613 (positive regulation of cardiac muscle hypertrophy), GO:0016049 (cell growth), GO:0016202 (regulation of striated muscle tissue development), GO:0021707 (cerebellar granule cell differentiation), GO:0030182 (neuron differentiation…		-0.302149	-0.265209	-0.261163		0.375375	0.367556	0.08559				339.094	73.4135	80.5188	0.578614	5.81874	36.5729	1.82044e-05	0.00412847	3.18902e-08	3.16023e-08	0.1	0.310247	0.036225	0.87831	0.928745	0.0213116	0.00743504		44.214	45.4125	45.5457	71.9143	71.5147	58.4636
ENSG00000188157	AGRN	PC	agrin		This gene encodes one of several proteins that are critical in the development of the neuromuscular junction (NMJ), as identified in mouse knock-out studies. The encoded protein contains several laminin G, Kazal type serine protease inhibitor, and epidermal growth factor domains. Additional post-translational modifications occur to add glycosaminoglycans and disulfide bonds. In one family with co…	hsa04512 (ECM-receptor interaction), GO:0001523 (retinoid metabolic process), GO:0006024 (glycosaminoglycan biosynthetic process), GO:0006027 (glycosaminoglycan catabolic process), GO:0007010 (cytoskeleton organization), GO:0007165 (signal transduction), GO:0007213 (G-protein coupled acetylcholine receptor signaling pathway), GO:0030198 (extracellular matrix organization), GO:0030203 (glycosamino…		0.179127	0.282043	0.16038		-0.240423	-0.165405	-0.215723				336.974	83.8406	79.4553	-0.423434	6.63764	36.2456	1.91479e-05	0.00419843	6.9947e-08	7.06169e-08	0.1	0.310247	0.00463806	-0.87831	-0.974277	0.0213116	0.000984029		111.467	119.857	110.002	82.8346	87.3625	84.2995
ENSG00000159200	RCAN1	PC	regulator of calcineurin 1		The protein encoded by this gene interacts with calcineurin A and inhibits calcineurin-dependent signaling pathways, possibly affecting central nervous system development. This gene is located in the minimal candidate region for the Down syndrome phenotype, and is overexpressed in the brain of Down syndrome fetuses. Chronic overexpression of this gene may lead to neurofibrillary tangles such as t…	hsa04919 (Thyroid hormone signaling pathway), hsa04921 (Oxytocin signaling pathway), hsa05167 (Kaposi sarcoma-associated herpesvirus infection), GO:0006355 (regulation of transcription, DNA-templated), GO:0007165 (signal transduction), GO:0007417 (central nervous system development), GO:0008015 (blood circulation), GO:0033173 (calcineurin-NFAT signaling cascade), GO:0050790 (regulation of catalyt…		-0.254873	-0.183704	-0.152789		0.266059	0.157874	0.167433				335.899	87.1866	74.0164	0.40079	6.96816	36.0801	1.96461e-05	0.00419843	8.47863e-08	8.56674e-08	0.1	0.310247	0.00218135	0.87831	0.971933	0.0213116	0.00117059		103.343	108.67	111.068	149.156	138.235	139.167
ENSG00000140307	GTF2A2	PC	general transcription factor IIA subunit 2		Accurate transcription initiation on TATA-containing class II genes involves the ordered assembly of RNA polymerase II (POLR2A; MIM 180660) and the general initiation factors TFIIA, TFIIB (MIM 189963), TFIID (MIM 313650), TFIIE (MIM 189962), TFIIF (MIM 189968), TFIIG/TFIIJ, and TFIIH (MIM 189972). The first step involves recognition of the TATA element by the TATA-binding subunit (TBP; MIM 600075…	hsa03022 (Basal transcription factors), hsa05203 (Viral carcinogenesis), GO:0006366 (transcription from RNA polymerase II promoter), GO:0006367 (transcription initiation from RNA polymerase II promoter), GO:0006368 (transcription elongation from RNA polymerase II promoter), GO:0016032 (viral process), GO:0042795 (snRNA transcription from RNA polymerase II promoter), GO:0045944 (positive regulatio…		-0.197257	-0.223833	-0.1935		0.291113	0.219652	0.103825				335.299	86.0972	9.77951	0.418829	6.86618	35.9877	1.99303e-05	0.00419843	7.91323e-08	7.98692e-08	0.1	0.310247	0.0205745	0.87831	0.956533	0.0213116	0.00279301		100.147	98.2828	100.414	141.298	134.373	123.852
ENSG00000178209	PLEC	PC	plectin		Plectin is a prominent member of an important family of structurally and in part functionally related proteins, termed plakins or cytolinkers, that are capable of interlinking different elements of the cytoskeleton. Plakins, with their multi-domain structure and enormous size, not only play crucial roles in maintaining cell and tissue integrity and orchestrating dynamic changes in cytoarchitectur…	GO:0031581 (hemidesmosome assembly), GO:0005829 (cytosol), GO:0005886 (plasma membrane), GO:0005903 (brush border), GO:0005925 (focal adhesion), GO:0016528 (sarcoplasm), GO:0030056 (hemidesmosome), GO:0031012 (extracellular matrix), GO:0042383 (sarcolemma), GO:0043034 (costamere), GO:0045111 (intermediate filament cytoskeleton), GO:0070062 (extracellular vesicular exosome), GO:0003723 (RNA bindin…		0.142173	0.35939	0.284228		-0.499274	-0.200456	-0.0860608				334.858	95.2101	99.9222	-0.519812	8.24315	35.9199	2.0142e-05	0.00419843	4.69044e-08	4.72689e-08	0.1	0.310247	0.0164696	-0.87831	-0.901093	0.0213116	0.0141902		327.476	381.012	361.569	209.217	257.826	279.267
ENSG00000134851	TMEM165	PC	transmembrane protein 165		This gene encodes a predicted transmembrane protein with a perinuclear Golgi-like distribution in fibroblasts. Mutations in this gene are associated with the autosomal recessive disorder congenital disorder of glycosylation, type IIk. Knockdown of this gene_s expression causes decreased sialylation in HEK cells and suggests this gene plays a role in terminal Golgi glycosylation. Alternative splic…	GO:0006487 (protein N-linked glycosylation), GO:0006874 (cellular calcium ion homeostasis), GO:0032472 (Golgi calcium ion transport), GO:0035751 (regulation of lysosomal lumen pH), GO:0005765 (lysosomal membrane), GO:0005794 (Golgi apparatus), GO:0010008 (endosome membrane), GO:0016021 (integral component of membrane), GO:0031901 (early endosome membrane), GO:0031902 (late endosome membrane), GO:…		-0.276966	-0.139467	-0.316857		0.338259	0.22937	0.165661				333.834	77.7538	28.8716	0.502703	6.13715	35.7626	2.06429e-05	0.00419843	4.7825e-08	4.79174e-08	0.1	0.310247	0.00365079	0.87831	0.955598	0.0213116	0.00291356		56.5992	62.4589	55.0011	87.762	81.2365	77.6408
ENSG00000092621	PHGDH	PC	phosphoglycerate dehydrogenase		This gene encodes the enzyme which is involved in the early steps of L-serine synthesis in animal cells. L-serine is required for D-serine and other amino acid synthesis. The enzyme requires NAD/NADH as a cofactor and forms homotetramers for activity. Mutations in this gene have been found in a family with congenital microcephaly, psychomotor retardation and other symptoms. Multiple alternatively…	hsa00260 (Glycine, serine and threonine metabolism), hsa01100 (Metabolic pathways), hsa01200 (Carbon metabolism), hsa01230 (Biosynthesis of amino acids), GO:0006541 (glutamine metabolic process), GO:0006544 (glycine metabolic process), GO:0006564 (L-serine biosynthetic process), GO:0006566 (threonine metabolic process), GO:0007420 (brain development), GO:0009448 (gamma-aminobutyric acid metabolic…		0.0883531	0.245738	0.18098		-0.199155	-0.177378	-0.138539				333.407	94.7086	48.4479	-0.347054	8.13908	35.6971	2.08554e-05	0.00419843	2.3925e-07	2.4152e-07	0.1	0.310247	0.0148076	-0.87831	-0.955105	0.0213116	0.00297813		297.246	331.738	317.089	243.177	246.906	253.698
ENSG00000213639	PPP1CB	PC	protein phosphatase 1 catalytic subunit beta		The protein encoded by this gene is one of the three catalytic subunits of protein phosphatase 1 (PP1). PP1 is a serine/threonine specific protein phosphatase known to be involved in the regulation of a variety of cellular processes, such as cell division, glycogen metabolism, muscle contractility, protein synthesis, and HIV-1 viral transcription. Mouse studies suggest that PP1 functions as a sup…	hsa03015 (mRNA surveillance pathway), hsa04022 (cGMP-PKG signaling pathway), hsa04024 (cAMP signaling pathway), hsa04114 (Oocyte meiosis), hsa04218 (Cellular senescence), hsa04261 (Adrenergic signaling in cardiomyocytes), hsa04270 (Vascular smooth muscle contraction), hsa04390 (Hippo signaling pathway), hsa04510 (Focal adhesion), hsa04611 (Platelet activation), hsa04720 (Long-term potentiation), …		-0.565577	-0.429395	-0.442449		0.874083	0.483439	0.0799003				333.013	48.5561	67.7475	1.10438	4.29596	35.6367	2.10538e-05	0.00419843	2.05007e-08	2.37071e-08	0.1	0.310247	0.0855746	0.87831	0.844492	0.0213116	0.0343939		11.453	12.7848	12.6516	34.4922	25.8359	19.044
ENSG00000086589	RBM22	PC	RNA binding motif protein 22		This gene encodes an RNA binding protein. The encoded protein may play a role in cell division and may be involved in pre-mRNA splicing. Related pseudogenes exist on chromosomes 6, 7, 9, 13, 16, 18, and X. [provided by RefSeq, Mar 2009].	hsa03040 (Spliceosome), GO:0000060 (protein import into nucleus, translocation), GO:0000387 (spliceosomal snRNP assembly), GO:0000398 (mRNA splicing, via spliceosome), GO:0033120 (positive regulation of RNA splicing), GO:0035690 (cellular response to drug), GO:0045292 (mRNA cis splicing, via spliceosome), GO:0090316 (positive regulation of intracellular protein transport), GO:0000974 (Prp19 compl…		-0.232592	-0.210599	-0.178227		0.28352	0.221784	0.116114				330.673	84.1432	34.2672	0.424034	6.66188	35.2785	2.22748e-05	0.00436662	9.93508e-08	1.00373e-07	0.1	0.310247	0.0135572	0.87831	0.963855	0.0213116	0.00193612		84.699	86.0308	88.0284	121.988	116.794	108.404
ENSG00000104472	CHRAC1	PC	chromatin accessibility complex 1		CHRAC1 is a histone-fold protein that interacts with other histone-fold proteins to bind DNA in a sequence-independent manner. These histone-fold protein dimers combine within larger enzymatic complexes for DNA transcription, replication, and packaging.[supplied by OMIM, Apr 2004].	GO:0006338 (chromatin remodeling), GO:0071897 (DNA biosynthetic process), GO:0008622 (epsilon DNA polymerase complex), GO:0008623 (CHRAC), GO:0003677 (DNA binding), GO:0003887 (DNA-directed DNA polymerase activity), GO:0005515 (protein binding), GO:0046982 (protein heterodimerization activity)		-0.263693	-0.318998	-0.135509		0.299814	0.27586	0.142526				327.467	78.1169	42.6459	0.491928	6.1624	34.7895	2.40724e-05	0.00442873	7.25292e-08	7.28721e-08	0.1	0.310247	0.00321929	0.87831	0.956305	0.0213116	0.00282222		58.1973	55.9333	63.7906	86.963	85.4981	77.7739
ENSG00000165672	PRDX3	PC	peroxiredoxin 3		This gene encodes a mitochondrial protein with antioxidant function. The protein is similar to the C22 subunit of Salmonella typhimurium alkylhydroperoxide reductase, and it can rescue bacterial resistance to alkylhydroperoxide in E. coli that lack the C22 subunit. The human and mouse genes are highly conserved, and they map to the regions syntenic between mouse and human chromosomes. Sequence co…	GO:0000302 (response to reactive oxygen species), GO:0001893 (maternal placenta development), GO:0006915 (apoptotic process), GO:0006979 (response to oxidative stress), GO:0007005 (mitochondrion organization), GO:0008284 (positive regulation of cell proliferation), GO:0018171 (peptidyl-cysteine oxidation), GO:0030099 (myeloid cell differentiation), GO:0032496 (response to lipopolysaccharide), GO:…		-0.232505	-0.203717	-0.158394		0.214049	0.231991	0.148576				327.459	83.953	50.3848	0.404504	6.6463	34.7882	2.40774e-05	0.00442873	1.37573e-07	1.39356e-07	0.1	0.310247	0.000715035	0.87831	0.985302	0.0213116	0.000322444		83.9	85.6312	88.4279	115.063	116.528	109.869
ENSG00000121579	NAA50	PC	N(alpha)-acetyltransferase 50, NatE catalytic subunit			GO:0006474 (N-terminal protein amino acid acetylation), GO:0043967 (histone H4 acetylation), GO:0071962 (mitotic sister chromatid cohesion, centromeric), GO:0005634 (nucleus), GO:0005737 (cytoplasm), GO:0031415 (NatA complex), GO:0070062 (extracellular vesicular exosome), GO:0004596 (peptide alpha-N-acetyltransferase activity), GO:0005515 (protein binding), GO:0010485 (H4 histone acetyltransferas…		-0.181236	-0.419385	-0.331684		0.566121	0.161437	0.204747				326.031	75.3847	58.5473	0.650576	5.96842	34.5712	2.49275e-05	0.00442873	3.8708e-08	3.83035e-08	0.1	0.310247	0.0497563	0.87831	0.875694	0.0213116	0.0222176		53.1366	44.7467	47.6765	90.5587	67.919	70.0498
ENSG00000173436	MINOS1	PC	mitochondrial inner membrane organizing system 1			GO:0008150 (biological_process), GO:0005739 (mitochondrion), GO:0005743 (mitochondrial inner membrane), GO:0016021 (integral component of membrane), GO:0003674 (molecular_function), GO:0005515 (protein binding)		-0.212825	-0.197607	-0.187049		0.316504	0.193767	0.0872085				325.946	88.8985	35.2962	0.406884	7.18371	34.5582	2.49795e-05	0.00442873	1.51235e-07	1.52773e-07	0.1	0.310247	0.0332698	0.87831	0.934686	0.0213116	0.00625955		123.586	124.918	125.85	179.253	164.471	152.618
ENSG00000155959	VBP1	PC	VHL binding protein 1		The protein encoded by this gene interacts with the Von Hippel-Lindau protein to form an intracellular complex. Because it functions as a chaperone protein, it is suspected that it may play a role in the transport of the Von Hippel-Lindau protein from the perinuclear granules to the nucleus or cytoplasm. [provided by RefSeq, Jul 2008]. Publication Note: This RefSeq record includes a subset of the…	GO:0006457 (protein folding), GO:0007017 (microtubule-based process), GO:0007021 (tubulin complex assembly), GO:0005634 (nucleus), GO:0005737 (cytoplasm), GO:0005829 (cytosol), GO:0005844 (polysome), GO:0016272 (prefoldin complex), GO:0043231 (intracellular membrane-bounded organelle), GO:0005515 (protein binding), GO:0015631 (tubulin binding), R-HSA-389957 (Homo sapiens: Prefoldin mediated trans…		-0.232613	-0.267739	-0.303742		0.330675	0.344033	0.129386				325.657	68.3555	35.8323	0.563737	5.48084	34.5144	2.51555e-05	0.00442873	9.44604e-08	1.02974e-07	0.1	0.310247	0.0184391	0.87831	0.95582	0.0213116	0.00288464		36.7562	35.824	34.8917	55.2674	55.8001	47.8097
ENSG00000257950	P2RX5-TAX1BP3	PC	P2RX5-TAX1BP3 readthrough (NMD candidate)		This locus represents naturally occurring read-through transcription between the neighboring P2RX5 (purinergic receptor P2X, ligand-gated ion channel, 5) and TAX1BP3 (Tax1 binding protein 3) genes on chromosome 17. The read-through transcript is a candidate for nonsense-mediated mRNA decay (NMD), and is thus unlikely to produce a protein product. [provided by RefSeq, Mar 2011]. Sequence Note: Thi…			0.376556	0.307932	0.281804		-0.498449	-0.392466	-0.0753764				325.635	66.8165	99.144	-0.664909	5.37216	34.511	2.51692e-05	0.00442873	3.39556e-08	3.71534e-08	0.1	0.310247	0.0177251	-0.87831	-0.944682	0.0213116	0.00450553		52.4708	49.9405	49.0082	27.7003	29.9643	37.8216
ENSG00000106399	RPA3	PC	replication protein A3			hsa03030 (DNA replication), hsa03420 (Nucleotide excision repair), hsa03430 (Mismatch repair), hsa03440 (Homologous recombination), hsa03460 (Fanconi anemia pathway), GO:0000082 (G1/S transition of mitotic cell cycle), GO:0000722 (telomere maintenance via recombination), GO:0000724 (double-strand break repair via homologous recombination), GO:0006260 (DNA replication), GO:0006283 (transcription-c…		-0.12463	-0.303421	-0.250038		0.396195	0.135951	0.145943				325.467	89.7717	16.8266	0.461052	7.29983	34.4856	2.5272e-05	0.00442873	9.94948e-08	1.00225e-07	0.1	0.310247	0.0310474	0.87831	0.897704	0.0213116	0.0151616		141.964	125.184	129.978	204.556	170.463	171.662
ENSG00000113140	SPARC	PC	secreted protein acidic and cysteine rich		This gene encodes a cysteine-rich acidic matrix-associated protein. The encoded protein is required for the collagen in bone to become calcified but is also involved in extracellular matrix synthesis and promotion of changes to cell shape. The gene product has been associated with tumor suppression but has also been correlated with metastasis based on changes to cell shape which can promote tumor…	GO:0001503 (ossification), GO:0001937 (negative regulation of endothelial cell proliferation), GO:0002576 (platelet degranulation), GO:0006898 (receptor-mediated endocytosis), GO:0007165 (signal transduction), GO:0007507 (heart development), GO:0009629 (response to gravity), GO:0010288 (response to lead ion), GO:0010595 (positive regulation of endothelial cell migration), GO:0016525 (negative reg…		-0.128978	-0.206087	-0.185754		0.245313	0.086173	0.189333				324.518	99.2564	24.1159	0.348836	10.457	34.3416	2.58638e-05	0.00446478	6.55476e-06	6.59594e-06	0.1	0.310247	0.0124616	0.87831	0.952121	0.0213116	0.0033837		1274.88	1208.43	1225.61	1653.1	1480.24	1590.1
ENSG00000164442	CITED2	PC	Cbp/p300 interacting transactivator with Glu/Asp rich carboxy-terminal domain 2		The protein encoded by this gene inhibits transactivation of HIF1A-induced genes by competing with binding of hypoxia-inducible factor 1-alpha to p300-CH1. Mutations in this gene are a cause of cardiac septal defects. Alternatively spliced transcript variants encoding multiple isoforms have been observed for this gene. [provided by RefSeq, May 2012].	hsa04137 (Mitophagy - animal), GO:0000122 (negative regulation of transcription from RNA polymerase II promoter), GO:0001666 (response to hypoxia), GO:0001889 (liver development), GO:0003151 (outflow tract morphogenesis), GO:0003156 (regulation of organ formation), GO:0006351 (transcription, DNA-templated), GO:0007368 (determination of left/right symmetry), GO:0007507 (heart development), GO:0007…		-0.184894	-0.10941	-0.292106		0.189533	0.274648	0.12223				323.024	90.5931	63.1388	0.394993	7.40181	34.1153	2.68256e-05	0.00456272	1.83266e-07	1.85144e-07	0.1	0.310247	0.00474193	0.87831	0.944013	0.0213116	0.00461412		146.758	154.749	136.104	190.839	202.558	182.05
ENSG00000116489	CAPZA1	PC	capping actin protein of muscle Z-line subunit alpha 1		CAPZA1 is a member of the F-actin capping protein alpha subunit family. This gene encodes the alpha subunit of the barbed-end actin binding protein. The protein regulates growth of the actin filament by capping the barbed end of growing actin filaments. [provided by RefSeq, Jul 2008]. Publication Note: This RefSeq record includes a subset of the publications that are available for this gene. Plea…	hsa04144 (Endocytosis), GO:0006461 (protein complex assembly), GO:0006928 (cellular component movement), GO:0007596 (blood coagulation), GO:0045087 (innate immune response), GO:0051016 (barbed-end actin filament capping), GO:0005576 (extracellular region), GO:0005829 (cytosol), GO:0005856 (cytoskeleton), GO:0008290 (F-actin capping protein complex), GO:0015629 (actin cytoskeleton), GO:0070062 (ex…		-0.357333	-0.192767	-0.195451		0.361464	0.301811	0.082276				321.105	80.5983	26.8742	0.512363	6.35035	33.8254	2.81173e-05	0.00465868	9.58964e-08	9.63099e-08	0.1	0.310247	0.0218832	0.87831	0.918546	0.0213116	0.00968181		61.9262	69.6503	69.5171	103.21	98.9487	84.699
ENSG00000145604	SKP2	PC	S-phase kinase associated protein 2		This gene encodes a member of the F-box protein family which is characterized by an approximately 40 amino acid motif, the F-box. The F-box proteins constitute one of the four subunits of ubiquitin protein ligase complex called SCFs (SKP1-cullin-F-box), which function in phosphorylation-dependent ubiquitination. The F-box proteins are divided into 3 classes: Fbws containing WD-40 domains, Fbls co…	hsa04068 (FoxO signaling pathway), hsa04110 (Cell cycle), hsa04120 (Ubiquitin mediated proteolysis), hsa04150 (mTOR signaling pathway), hsa05168 (Herpes simplex infection), hsa05169 (Epstein-Barr virus infection), hsa05200 (Pathways in cancer), hsa05203 (Viral carcinogenesis), hsa05222 (Small cell lung cancer), GO:0000082 (G1/S transition of mitotic cell cycle), GO:0000086 (G2/M transition of mit…		-0.265998	-0.446435	-0.235138		0.643474	0.118492	0.185605				320.862	86.6246	60.5793	0.659257	6.91555	33.7888	2.82852e-05	0.00465868	3.99614e-08	4.00348e-08	0.1	0.310247	0.0868826	0.87831	0.827058	0.0213116	0.0422774		96.5516	84.9654	98.6823	183.115	126.649	132.775
ENSG00000132561	MATN2	PC	matrilin 2		This gene encodes a member of the von Willebrand factor A domain containing protein family. This family of proteins is thought to be involved in the formation of filamentous networks in the extracellular matrices of various tissues. This protein contains five von Willebrand factor A domains. The specific function of this gene has not yet been determined. Two transcript variants encoding different…	GO:0001764 (neuron migration), GO:0007411 (axon guidance), GO:0008150 (biological_process), GO:0008347 (glial cell migration), GO:0031104 (dendrite regeneration), GO:0048678 (response to axon injury), GO:0005578 (proteinaceous extracellular matrix), GO:0005604 (basement membrane), GO:0005615 (extracellular space), GO:0031012 (extracellular matrix), GO:0003674 (molecular_function), GO:0005509 (cal…		-0.155415	-0.158821	-0.272308		0.2304	0.239485	0.116659				320.414	87.1952	60.294	0.39737	6.96918	33.7213	2.85982e-05	0.00465868	2.00079e-07	2.02517e-07	0.1	0.310247	0.00286107	0.87831	0.962154	0.0213116	0.00212138		110.934	110.668	102.145	145.56	146.492	134.373
ENSG00000148908	RGS10	PC	regulator of G protein signaling 10		Regulator of G protein signaling (RGS) family members are regulatory molecules that act as GTPase activating proteins (GAPs) for G alpha subunits of heterotrimeric G proteins. RGS proteins are able to deactivate G protein subunits of the Gi alpha, Go alpha and Gq alpha subtypes. They drive G proteins into their inactive GDP-bound forms. Regulator of G protein signaling 10 belongs to this family. …	GO:0007213 (G-protein coupled acetylcholine receptor signaling pathway), GO:0009968 (negative regulation of signal transduction), GO:0043547 (positive regulation of GTPase activity), GO:0005634 (nucleus), GO:0005829 (cytosol), GO:0005886 (plasma membrane), GO:0043025 (neuronal cell body), GO:0043197 (dendritic spine), GO:0043679 (axon terminus), GO:0001965 (G-protein alpha-subunit binding), GO:00…		-0.171605	-0.279326	-0.164624		0.342846	0.203219	0.0694899				318.906	91.5788	6.54561	0.418217	7.53968	33.4943	2.96795e-05	0.00476768	2.11534e-07	2.13511e-07	0.1	0.310247	0.0336157	0.87831	0.906886	0.0213116	0.0126017		162.739	150.887	163.538	233.322	211.614	192.704
ENSG00000040275	SPDL1	PC	spindle apparatus coiled-coil protein 1			GO:0000132 (establishment of mitotic spindle orientation), GO:0007062 (sister chromatid cohesion), GO:0007080 (mitotic metaphase plate congression), GO:0031577 (spindle checkpoint), GO:0034501 (protein localization to kinetochore), GO:0051301 (cell division), GO:0000922 (spindle pole), GO:0000940 (condensed chromosome outer kinetochore), GO:0005634 (nucleus), GO:0005815 (microtubule organizing ce…		-0.242799	-0.149525	-0.218909		0.229941	0.214428	0.166864				317.13	81.1257	17.8642	0.41696	6.39365	33.2273	3.10101e-05	0.00491319	2.22046e-07	2.25319e-07	0.1	0.310247	0.000256441	0.87831	0.987408	0.0213116	0.000236823		69.7835	74.5778	70.982	97.6169	96.5516	93.3554
ENSG00000168003	SLC3A2	PC	solute carrier family 3 member 2		This gene is a member of the solute carrier family and encodes a cell surface, transmembrane protein. The protein exists as the heavy chain of a heterodimer, covalently bound through di-sulfide bonds to one of several possible light chains. The encoded transporter plays a role in regulation of intracellular calcium levels and transports L-type amino acids. Alternatively spliced transcript variant…	hsa04150 (mTOR signaling pathway), hsa04216 (Ferroptosis), hsa04974 (Protein digestion and absorption), GO:0005975 (carbohydrate metabolic process), GO:0006569 (tryptophan catabolic process), GO:0006816 (calcium ion transport), GO:0006865 (amino acid transport), GO:0015827 (tryptophan transport), GO:0016049 (cell growth), GO:0035725 (sodium ion transmembrane transport), GO:0043330 (response to ex…		0.189321	0.14632	0.108365		-0.187135	-0.122131	-0.134741				316.114	97.5532	28.6641	-0.297218	9.06108	33.0751	3.17992e-05	0.00491957	2.03845e-06	2.0546e-06	0.1	0.310247	0.00123408	-0.87831	-0.978203	0.0213116	0.000707507		605.678	587.832	572.517	466.111	487.685	483.424
ENSG00000167005	NUDT21	PC	nudix hydrolase 21		The protein encoded by this gene is one subunit of a cleavage factor required for 3_ RNA cleavage and polyadenylation processing. The interaction of the protein with the RNA is one of the earliest steps in the assembly of the 3_ end processing complex and facilitates the recruitment of other processing factors. This gene encodes the 25kD subunit of the protein complex, which is composed of four p…	hsa03015 (mRNA surveillance pathway), GO:0000398 (mRNA splicing, via spliceosome), GO:0006369 (termination of RNA polymerase II transcription), GO:0006378 (mRNA polyadenylation), GO:0006397 (mRNA processing), GO:0031124 (mRNA 3'-end processing), GO:0051262 (protein tetramerization), GO:0005634 (nucleus), GO:0005654 (nucleoplasm), GO:0005813 (centrosome), GO:0005815 (microtubule organizing center)…		-0.404929	-0.417983	-0.2805		0.575328	0.276302	0.251782				315.832	47.1209	28.9148	0.826546	4.21379	33.0329	3.20221e-05	0.00491957	1.73835e-07	2.0083e-07	0.1	0.310247	0.0268593	0.87831	0.934342	0.0213116	0.00632494		12.7848	12.6516	14.1165	27.1676	21.7075	21.3079
ENSG00000124795	DEK	PC	DEK proto-oncogene		This gene encodes a protein with one SAP domain. This protein binds to cruciform and superhelical DNA and induces positive supercoils into closed circular DNA, and is also involved in splice site selection during mRNA processing. Chromosomal aberrations involving this region, increased expression of this gene, and the presence of antibodies against this protein are all associated with various dis…	GO:0006338 (chromatin remodeling), GO:0006357 (regulation of transcription from RNA polymerase II promoter), GO:0006366 (transcription from RNA polymerase II promoter), GO:0007165 (signal transduction), GO:0016569 (covalent chromatin modification), GO:0019079 (viral genome replication), GO:0045815 (positive regulation of gene expression, epigenetic), GO:2000779 (regulation of double-strand break …		-0.340866	-0.293892	-0.30051		0.549302	0.396075	-0.0101097				315.451	78.1947	37.6221	0.660496	6.16731	32.9757	3.23264e-05	0.00491957	6.76163e-08	6.7307e-08	0.1	0.310247	0.0824552	0.87831	0.851405	0.0213116	0.0314804		54.3352	56.1997	55.9333	102.411	91.8904	68.8512
ENSG00000101439	CST3	PC	cystatin C		The cystatin superfamily encompasses proteins that contain multiple cystatin-like sequences. Some of the members are active cysteine protease inhibitors, while others have lost or perhaps never acquired this inhibitory activity. There are three inhibitory families in the superfamily, including the type 1 cystatins (stefins), type 2 cystatins and the kininogens. The type 2 cystatin proteins are a …	hsa04970 (Salivary secretion), GO:0001654 (eye development), GO:0001666 (response to hypoxia), GO:0006915 (apoptotic process), GO:0006952 (defense response), GO:0007420 (brain development), GO:0007431 (salivary gland development), GO:0007566 (embryo implantation), GO:0008284 (positive regulation of cell proliferation), GO:0009636 (response to toxic substance), GO:0009743 (response to carbohydrate…		0.168011	0.154006	0.179908		-0.255678	-0.0522582	-0.193988				313.891	96.8874	61.444	-0.333664	8.75139	32.7426	3.36027e-05	0.00504739	1.03265e-06	1.04144e-06	0.1	0.310247	0.0234228	-0.87831	-0.949545	0.0213116	0.00375438		480.494	475.833	484.489	357.707	412.175	373.421
ENSG00000164754	RAD21	PC	RAD21 cohesin complex component		The protein encoded by this gene is highly similar to the gene product of Schizosaccharomyces pombe rad21, a gene involved in the repair of DNA double-strand breaks, as well as in chromatid cohesion during mitosis. This protein is a nuclear phospho-protein, which becomes hyperphosphorylated in cell cycle M phase. The highly regulated association of this protein with mitotic chromatin specifically…	hsa04110 (Cell cycle), GO:0006302 (double-strand break repair), GO:0006310 (DNA recombination), GO:0006357 (regulation of transcription from RNA polymerase II promoter), GO:0006366 (transcription from RNA polymerase II promoter), GO:0006915 (apoptotic process), GO:0007062 (sister chromatid cohesion), GO:0007067 (mitotic nuclear division), GO:0007131 (reciprocal meiotic recombination), GO:0010972 …		-0.356597	-0.19479	-0.210178		0.368301	0.260792	0.132472				312.566	73.5259	38.8413	0.527371	5.8261	32.5448	3.47301e-05	0.00509672	1.78161e-07	1.79139e-07	0.1	0.310247	0.0110389	0.87831	0.941706	0.0213116	0.00499824		42.8822	48.2092	47.6765	72.1806	66.8536	60.9939
ENSG00000168036	CTNNB1	PC	catenin beta 1		The protein encoded by this gene is part of a complex of proteins that constitute adherens junctions (AJs). AJs are necessary for the creation and maintenance of epithelial cell layers by regulating cell growth and adhesion between cells. The encoded protein also anchors the actin cytoskeleton and may be responsible for transmitting the contact inhibition signal that causes cells to stop dividing…	hsa04015 (Rap1 signaling pathway), hsa04310 (Wnt signaling pathway), hsa04390 (Hippo signaling pathway), hsa04510 (Focal adhesion), hsa04520 (Adherens junction), hsa04550 (Signaling pathways regulating pluripotency of stem cells), hsa04670 (Leukocyte transendothelial migration), hsa04916 (Melanogenesis), hsa04919 (Thyroid hormone signaling pathway), hsa04934 (Cushing syndrome), hsa05100 (Bacteria…		-0.28432	-0.277392	-0.248316		0.515812	0.294253	-3.6464e-05				312.471	88.25	56.2127	0.563538	7.09045	32.5306	3.48125e-05	0.00509672	1.1259e-07	1.13252e-07	0.1	0.310247	0.088015	0.87831	0.842821	0.0213116	0.0351164		108.67	109.203	111.467	190.706	163.272	132.775
ENSG00000113583	C5orf15	PC	chromosome 5 open reading frame 15			GO:0016021 (integral component of membrane)		-0.273736	-0.299498	-0.211274		0.479709	0.18684	0.11796				311.658	78.3849	34.1202	0.546153	6.18018	32.4095	3.55255e-05	0.0051361	1.63431e-07	1.64075e-07	0.1	0.310247	0.0568557	0.87831	0.887016	0.0213116	0.0184271		58.1973	57.1319	60.8608	99.4814	80.837	76.9749
ENSG00000185088	RPS27L	PC	ribosomal protein S27 like		This gene encodes a protein sharing 96% amino acid similarity with ribosomal protein S27, which suggests the encoded protein may be a component of the 40S ribosomal subunit. [provided by RefSeq, Jul 2008].	hsa03010 (Ribosome), GO:0000028 (ribosomal small subunit assembly), GO:0006281 (DNA repair), GO:0006412 (translation), GO:0006919 (activation of cysteine-type endopeptidase activity involved in apoptotic process), GO:0006974 (cellular response to DNA damage stimulus), GO:0031571 (mitotic G1 DNA damage checkpoint), GO:0042771 (intrinsic apoptotic signaling pathway in response to DNA damage by p53 …		-0.12428	-0.21791	-0.200106		0.275846	0.0925029	0.173947				310.84	91.6566	62.0752	0.366805	7.54706	32.2878	3.62591e-05	0.00517744	5.04492e-07	5.10499e-07	0.1	0.310247	0.0152137	0.87831	0.940876	0.0213116	0.00514022		169.664	158.877	160.875	224.532	197.498	209.084
ENSG00000185728	YTHDF3	PC	YTH N6-methyladenosine RNA binding protein 3		This gene encodes a member of the YTH (YT521-B homology) domain protein family. The YTH domain is common in eukaryotes, is often found in the middle of the protein sequence, and may function in binding to RNA. Alternative splicing results in multiple transcript variants. [provided by RefSeq, Apr 2013].	GO:0003723 (RNA binding), GO:0005515 (protein binding), GO:1990247 (N6-methyladenosine-containing RNA binding)		-0.099003	-0.459916	-0.489508		0.543676	0.305996	0.198755				310.321	63.2544	80.3805	0.735639	5.15568	32.2105	3.67336e-05	0.00518123	9.92369e-08	1.08906e-07	0.1	0.310247	0.0155676	0.87831	0.902747	0.0213116	0.0137272		31.6955	24.2378	23.7051	50.6063	42.6159	39.4197
ENSG00000169714	CNBP	PC	CCHC-type zinc finger nucleic acid binding protein		This gene encodes a nucleic-acid binding protein with seven zinc-finger domains. The protein has a preference for binding single stranded DNA and RNA. The protein functions in cap-independent translation of ornithine decarboxylase mRNA, and may also function in sterol-mediated transcriptional regulation. A CCTG expansion in the first intron of this gene results in myotonic dystrophy type 2. Multi…	GO:0000122 (negative regulation of transcription from RNA polymerase II promoter), GO:0006351 (transcription, DNA-templated), GO:0006355 (regulation of transcription, DNA-templated), GO:0006695 (cholesterol biosynthetic process), GO:0008284 (positive regulation of cell proliferation), GO:0045893 (positive regulation of transcription, DNA-templated), GO:0045944 (positive regulation of transcriptio…		-0.162548	-0.158898	-0.182177		0.238095	0.120849	0.144679				307.876	91.0427	41.4008	0.340439	7.45953	31.8479	3.90562e-05	0.00528284	7.27412e-07	7.37634e-07	0.1	0.310247	0.012558	0.87831	0.971558	0.0213116	0.0012019		155.681	156.081	153.55	206.154	189.907	193.103
ENSG00000170540	ARL6IP1	PC	ADP ribosylation factor like GTPase 6 interacting protein 1			GO:0002038 (positive regulation of L-glutamate transport), GO:0006613 (cotranslational protein targeting to membrane), GO:0006915 (apoptotic process), GO:0043066 (negative regulation of apoptotic process), GO:0043154 (negative regulation of cysteine-type endopeptidase activity involved in apoptotic process), GO:0071787 (endoplasmic reticulum tubular network assembly), GO:1990809 (NA), GO:0005784 …		-0.269428	-0.249478	-0.177462		0.438006	0.177657	0.0807045				307.846	87.3249	20.7004	0.479222	6.99049	31.8433	3.90862e-05	0.00528284	2.55419e-07	2.57684e-07	0.1	0.310247	0.0618774	0.87831	0.875506	0.0213116	0.0222832		103.21	104.675	110.135	169.798	141.431	132.109
ENSG00000005884	ITGA3	PC	integrin subunit alpha 3		The protein encoded by this gene belongs to the family of integrins. Integrins are heterodimeric integral membrane proteins composed of an alpha chain and a beta chain, and function as cell surface adhesion molecules. This gene encodes alpha 3 subunit, which undergoes post-translational cleavage in the extracellular domain to yield disulfide-linked light and heavy chains that join with beta 1 sub…	hsa04151 (PI3K-Akt signaling pathway), hsa04510 (Focal adhesion), hsa04512 (ECM-receptor interaction), hsa04640 (Hematopoietic cell lineage), hsa04810 (Regulation of actin cytoskeleton), hsa05165 (Human papillomavirus infection), hsa05200 (Pathways in cancer), hsa05222 (Small cell lung cancer), hsa05410 (Hypertrophic cardiomyopathy (HCM)), hsa05412 (Arrhythmogenic right ventricular cardiomyopathy…		0.177041	0.173507	0.135643		-0.260225	-0.11649	-0.109477				307.655	98.3573	62.0925	-0.32343	9.59608	31.8151	3.92743e-05	0.00528284	4.79294e-06	4.82585e-06	0.1	0.310247	0.0107567	-0.87831	-0.962416	0.0213116	0.00209226		868.964	866.833	844.327	641.235	708.622	712.084
ENSG00000163584	RPL22L1	PC	ribosomal protein L22 like 1			hsa03010 (Ribosome), GO:0002181 (cytoplasmic translation), GO:0022625 (cytosolic large ribosomal subunit), GO:0003735 (structural constituent of ribosome), R-HSA-1430728 (Homo sapiens: Metabolism), R-HSA-156827 (Homo sapiens: L13a-mediated translational silencing of Ceruloplasmin expression), R-HSA-156842 (Homo sapiens: Eukaryotic Translation Elongation), R-HSA-156902 (Homo sapiens: Peptide chain…		-0.0974027	-0.48441	-0.325161		0.50403	0.142021	0.260923				307.503	77.7797	17.2849	0.621394	6.13897	31.7926	3.94245e-05	0.00528284	1.16532e-07	1.16427e-07	0.1	0.310247	0.0247669	0.87831	0.882271	0.0213116	0.0199743		63.6574	48.2092	54.0689	97.6169	75.51	82.1687
ENSG00000143633	C1orf131	PC	chromosome 1 open reading frame 131			GO:0005694 (chromosome), GO:0003723 (RNA binding)		-0.349622	-0.349622	-0.162553		0.232828	0.396141	0.232828				307.401	60.7816	41.9628	0.610689	5.00328	31.1152	4.42722e-05	0.00540618	3.48264e-07	3.85447e-07	0.0721982	0.310247	0.00311198	0.904534	0.958959	0.0132356	0.00249197		23.9714	23.9714	27.5671	36.8894	41.5505	36.8894
ENSG00000075702	WDR62	PC	WD repeat domain 62		This gene is proposed to play a role in cerebral cortical development. Mutations in this gene have been associated with microencephaly, cortical malformations, and mental retardation. Alternative splicing results in multiple transcript variants. [provided by RefSeq, Jan 2011].	GO:0007052 (mitotic spindle organization), GO:0007099 (centriole replication), GO:0008380 (RNA splicing), GO:0021987 (cerebral cortex development), GO:0022008 (neurogenesis), GO:0000922 (spindle pole), GO:0005634 (nucleus), GO:0005682 (U5 snRNP), GO:0005813 (centrosome), GO:0005814 (centriole), GO:0071011 (precatalytic spliceosome), GO:0071013 (catalytic step 2 spliceosome), GO:0005515 (protein b…		0.0952728	0.338276	0.25033		-0.370089	-0.191511	-0.122279				307.189	86.2182	91.0852	-0.463491	6.87766	31.746	3.97378e-05	0.00528284	2.54985e-07	2.57427e-07	0.1	0.310247	0.0132892	-0.87831	-0.912051	0.0213116	0.0112625		123.586	146.625	137.836	88.9606	100.946	106.007
ENSG00000137547	MRPL15	PC	mitochondrial ribosomal protein L15		Mammalian mitochondrial ribosomal proteins are encoded by nuclear genes and help in protein synthesis within the mitochondrion. Mitochondrial ribosomes (mitoribosomes) consist of a small 28S subunit and a large 39S subunit. They have an estimated 75% protein to rRNA composition compared to prokaryotic ribosomes, where this ratio is reversed. Another difference between mammalian mitoribosomes and …	hsa03010 (Ribosome), GO:0070125 (mitochondrial translational elongation), GO:0070126 (mitochondrial translational termination), GO:0005739 (mitochondrion), GO:0005743 (mitochondrial inner membrane), GO:0005762 (mitochondrial large ribosomal subunit), GO:0003723 (RNA binding), GO:0003735 (structural constituent of ribosome), GO:0005515 (protein binding), R-HSA-1852241 (Homo sapiens: Organelle biog…		-0.122653	-0.153293	-0.213254		0.205114	0.127251	0.156836				305.549	92.2445	16.3251	0.329273	7.64166	31.5038	4.14141e-05	0.00537272	9.0603e-07	9.1827e-07	0.1	0.310247	0.000733778	0.87831	0.978095	0.0213116	0.000714518		181.783	177.921	170.597	228.661	216.542	221.07
ENSG00000155115	GTF3C6	PC	general transcription factor IIIC subunit 6		RNA polymerases are unable to initiate RNA synthesis in the absence of additional proteins called general transcription factors (GTFs). GTFs assemble in a complex on the DNA promoter and recruit the RNA polymerase. GTF3C family proteins (e.g., GTF3C1, MIM 603246) are essential for RNA polymerase III to make a number of small nuclear and cytoplasmic RNAs, including 5S RNA (MIM 180420), tRNA, and a…	GO:0006351 (transcription, DNA-templated), GO:0006383 (transcription from RNA polymerase III promoter), GO:0042791 (5S class rRNA transcription from RNA polymerase III type 1 promoter), GO:0042797 (tRNA transcription from RNA polymerase III promoter), GO:0000127 (transcription factor TFIIIC complex), GO:0005654 (nucleoplasm), GO:0016604 (nuclear body), GO:0003677 (DNA binding), GO:0005515 (protei…		-0.0910199	-0.26067	-0.179707		0.232428	0.168377	0.130592				305.276	91.7085	16.7834	0.356988	7.55287	31.4634	4.17014e-05	0.00537272	6.93794e-07	7.02523e-07	0.1	0.310247	0.00364801	0.87831	0.955047	0.0213116	0.00298576		174.459	154.882	163.938	218.806	209.217	203.757
ENSG00000100979	PLTP	PC	phospholipid transfer protein		The protein encoded by this gene is one of at least two lipid transfer proteins found in human plasma. The encoded protein transfers phospholipids from triglyceride-rich lipoproteins to high density lipoprotein (HDL). In addition to regulating the size of HDL particles, this protein may be involved in cholesterol metabolism. At least two transcript variants encoding different isoforms have been f…	hsa03320 (PPAR signaling pathway), hsa04979 (Cholesterol metabolism), GO:0006629 (lipid metabolic process), GO:0006869 (lipid transport), GO:0010189 (vitamin E biosynthetic process), GO:0010875 (positive regulation of cholesterol efflux), GO:0030317 (sperm motility), GO:0034375 (high-density lipoprotein particle remodeling), GO:0005576 (extracellular region), GO:0005615 (extracellular space), GO:…		0.230419	0.428953	0.201757		-0.378346	-0.202038	-0.280744				305.175	61.9315	64.1418	-0.611077	5.07248	31.4486	4.18074e-05	0.00537272	3.08272e-07	3.40031e-07	0.1	0.310247	0.0114392	-0.87831	-0.946952	0.0213116	0.00414646		38.6206	44.6135	37.8216	24.6373	28.0998	26.5017
ENSG00000137309	HMGA1	PC	high mobility group AT-hook 1		This gene encodes a non-histone protein involved in many cellular processes, including regulation of inducible gene transcription, integration of retroviruses into chromosomes, and the metastatic progression of cancer cells. The encoded protein preferentially binds to the minor groove of A+T-rich regions in double-stranded DNA. It has little secondary structure in solution but assumes distinct co…	GO:0006268 (DNA unwinding involved in DNA replication), GO:0006284 (base-excision repair), GO:0006337 (nucleosome disassembly), GO:0006355 (regulation of transcription, DNA-templated), GO:0006366 (transcription from RNA polymerase II promoter), GO:0006461 (protein complex assembly), GO:0008285 (negative regulation of cell proliferation), GO:0009615 (response to virus), GO:0031936 (negative regula…		0.121621	0.29415	0.11574		-0.276659	-0.145933	-0.108919				304.051	96.4378	63.5538	-0.356779	8.61846	31.2828	4.30133e-05	0.00538598	1.24075e-06	1.25175e-06	0.1	0.310247	0.0160266	-0.87831	-0.910681	0.0213116	0.0116106		423.628	477.697	421.897	320.951	351.581	360.77
ENSG00000173706	HEG1	PC	heart development protein with EGF like domains 1			GO:0001570 (vasculogenesis), GO:0001701 (in utero embryonic development), GO:0001886 (endothelial cell morphogenesis), GO:0001945 (lymph vessel development), GO:0003017 (lymph circulation), GO:0003209 (cardiac atrium morphogenesis), GO:0003222 (ventricular trabecula myocardium morphogenesis), GO:0003281 (ventricular septum development), GO:0007043 (cell-cell junction assembly), GO:0009791 (post-e…		-0.220255	-0.30514	-0.279146		0.473164	0.201959	0.129418				303.836	72.4019	85.5599	0.564332	5.74662	31.2511	4.32478e-05	0.00538598	2.79695e-07	2.8087e-07	0.1	0.310247	0.0487088	0.87831	0.901317	0.0213116	0.014127		44.6135	41.95	42.749	73.3792	60.4612	57.3982
ENSG00000171530	TBCA	PC	tubulin folding cofactor A		The product of this gene is one of four proteins (cofactors A, D, E, and C) involved in the pathway leading to correctly folded beta-tubulin from folding intermediates. Cofactors A and D are believed to play a role in capturing and stabilizing beta-tubulin intermediates in a quasi-native confirmation. Cofactor E binds to the cofactor D/beta-tubulin complex; interaction with cofactor C then causes…	GO:0006457 (protein folding), GO:0007021 (tubulin complex assembly), GO:0007023 (post-chaperonin tubulin folding pathway), GO:0005730 (nucleolus), GO:0005737 (cytoplasm), GO:0005874 (microtubule), GO:0015630 (microtubule cytoskeleton), GO:0070062 (extracellular vesicular exosome), GO:0003723 (RNA binding), GO:0005515 (protein binding), GO:0048487 (beta-tubulin binding), GO:0051087 (chaperone bind…		-0.115568	-0.509298	-0.351471		0.662335	0.119847	0.194155				303.781	93.5414	9.29529	0.668156	7.88472	31.2431	4.33077e-05	0.00538598	1.17997e-07	1.19402e-07	0.1	0.310247	0.0801914	0.87831	0.81008	0.0213116	0.0506794		209.883	159.277	177.921	361.303	247.438	260.623
ENSG00000133119	RFC3	PC	replication factor C subunit 3		The elongation of primed DNA templates by DNA polymerase delta and DNA polymerase epsilon requires the accessory proteins proliferating cell nuclear antigen (PCNA) and replication factor C (RFC). RFC, also named activator 1, is a protein complex consisting of five distinct subunits of 140, 40, 38, 37, and 36 kDa. This gene encodes the 38 kDa subunit. This subunit is essential for the interaction …	hsa03030 (DNA replication), hsa03420 (Nucleotide excision repair), hsa03430 (Mismatch repair), GO:0000722 (telomere maintenance via recombination), GO:0000731 (DNA synthesis involved in DNA repair), GO:0006260 (DNA replication), GO:0006271 (DNA strand elongation involved in DNA replication), GO:0006283 (transcription-coupled nucleotide-excision repair), GO:0006296 (nucleotide-excision repair, DNA…		-0.190074	-0.17861	-0.387101		0.363839	0.162212	0.229734				302.487	73.4048	53.169	0.521348	5.81704	31.0527	4.47527e-05	0.00540618	3.06348e-07	3.08986e-07	0.1	0.310247	0.00593058	0.87831	0.941748	0.0213116	0.00499104		48.076	48.4755	41.6836	71.5147	61.9262	64.9892
ENSG00000118181	RPS25	PC	ribosomal protein S25		Ribosomes, the organelles that catalyze protein synthesis, consist of a small 40S subunit and a large 60S subunit. Together these subunits are composed of 4 RNA species and approximately 80 structurally distinct proteins. This gene encodes a ribosomal protein that is a component of the 40S subunit. The protein belongs to the S25E family of ribosomal proteins. It is located in the cytoplasm. As is…	hsa03010 (Ribosome), GO:0000184 (nuclear-transcribed mRNA catabolic process, nonsense-mediated decay), GO:0006364 (rRNA processing), GO:0006412 (translation), GO:0006413 (translational initiation), GO:0006614 (SRP-dependent cotranslational protein targeting to membrane), GO:0019083 (viral transcription), GO:0005634 (nucleus), GO:0005654 (nucleoplasm), GO:0005730 (nucleolus), GO:0005829 (cytosol),…		-0.0674517	-0.307944	-0.255886		0.38509	0.131243	0.114949				302.382	97.4494	13.2382	0.4242	8.97518	31.0372	4.48724e-05	0.00540618	8.45701e-07	8.53133e-07	0.1	0.310247	0.0343276	0.87831	0.86612	0.0213116	0.0256858		473.302	400.323	415.105	648.427	543.485	537.359
ENSG00000198853	RUSC2	PC	RUN and SH3 domain containing 2		This gene encodes a RUN and SH3 domain containing protein that interacts with Rab1b and Rab1-binding protein GM130. Alternatively spliced transcript variants have been observed for this gene. [provided by RefSeq, Jun 2012].	GO:0008150 (biological_process), GO:0005829 (cytosol), GO:0031410 (cytoplasmic vesicle), GO:0070062 (extracellular vesicular exosome), GO:0005515 (protein binding), GO:0017137 (Rab GTPase binding)		0.289884	0.17523	0.274052		-0.449685	-0.180648	-0.108833				297.829	80.1401	95.6939	-0.498774	6.31257	30.3704	5.03953e-05	0.00592117	3.24279e-07	3.27368e-07	0.1	0.310247	0.0150363	-0.87831	-0.932455	0.0213116	0.00668941		95.6193	88.1616	94.5539	56.466	68.4517	72.0474
ENSG00000197702	PARVA	PC	parvin alpha		This gene encodes a member of the parvin family of actin-binding proteins. Parvins are associated with focal contacts and contain calponin homology domains that bind to actin filaments. The encoded protein is part of the integrin-linked kinase signaling complex and plays a role in cell adhesion, motility and survival. [provided by RefSeq, Dec 2010]. Sequence Note: This RefSeq record was created f…	hsa04510 (Focal adhesion), GO:0002040 (sprouting angiogenesis), GO:0003148 (outflow tract septum morphogenesis), GO:0007163 (establishment or maintenance of cell polarity), GO:0008360 (regulation of cell shape), GO:0031532 (actin cytoskeleton reorganization), GO:0034113 (heterotypic cell-cell adhesion), GO:0034446 (substrate adhesion-dependent cell spreading), GO:0060271 (cilium morphogenesis), G…		-0.246747	-0.372846	-0.265939		0.473554	0.101606	0.310372				297.739	62.9172	64.8422	0.63241	5.13031	30.3573	5.05115e-05	0.00592117	4.16058e-07	4.5603e-07	0.1	0.310247	0.0381012	0.87831	0.912528	0.0213116	0.0111425		28.233	25.7027	27.8335	47.8097	36.4898	42.4827
ENSG00000143155	TIPRL	PC	TOR signaling pathway regulator		TIPRL is an inhibitory regulator of protein phosphatase-2A (PP2A) (see PPP2CA; MIM 176915), PP4 (see PPP4C; MIM 602035), and PP6 (see PPP6C; MIM 612725) (McConnell et al., 2007 [PubMed 17384681]).[supplied by OMIM, Nov 2010].	GO:0000077 (DNA damage checkpoint), GO:0032515 (negative regulation of phosphoprotein phosphatase activity), GO:0005737 (cytoplasm), GO:0005515 (protein binding)		-0.428736	-0.27445	-0.500268		0.487237	0.385073	0.331143				297.129	30.3735	69.4942	0.978126	3.29759	30.2682	5.13083e-05	0.00592117	3.82727e-07	4.75346e-07	0.1	0.310247	0.000603276	0.87831	0.981322	0.0213116	0.000520027		6.2592	7.19143	5.85968	13.5838	12.5184	11.9857
ENSG00000169733	RFNG	PC	RFNG O-fucosylpeptide 3-beta-N-acetylglucosaminyltransferase			hsa00514 (Other types of O-glycan biosynthesis), hsa04330 (Notch signaling pathway), hsa05165 (Human papillomavirus infection), GO:0007389 (pattern specification process), GO:0007399 (nervous system development), GO:0009887 (organ morphogenesis), GO:0030154 (cell differentiation), GO:0032092 (positive regulation of protein binding), GO:0045747 (positive regulation of Notch signaling pathway), GO:…		0.234027	0.16473	0.249224		-0.33033	-0.183182	-0.134469				296.741	78.8691	48.3268	-0.441818	6.2099	30.2116	5.18209e-05	0.00592117	5.3235e-07	5.40843e-07	0.1	0.310247	0.0037338	-0.87831	-0.965513	0.0213116	0.00176356		86.0308	81.9024	86.963	57.5314	63.9238	66.1878
ENSG00000283764	MIR6850	miRNA	microRNA 6850					0.101723	0.395618	0.459922		-0.643201	-0.254249	-0.0598127				296.391	94.3109	0.0518807	-0.631413	8.035	30.1607	5.22884e-05	0.00592117	2.40318e-07	2.43299e-07	0.1	0.310247	0.0280368	-0.87831	-0.859982	0.0213116	0.0280352		272.076	334.002	349.317	161.541	212.147	243.044
ENSG00000023041	ZDHHC6	PC	zinc finger DHHC-type containing 6			GO:0018345 (protein palmitoylation), GO:0005783 (endoplasmic reticulum), GO:0005789 (endoplasmic reticulum membrane), GO:0016021 (integral component of membrane), GO:0016409 (palmitoyltransferase activity), GO:0019706 (protein-cysteine S-palmitoyltransferase activity)		-0.217187	-0.22794	-0.313152		0.451007	0.127403	0.179868				296.005	75.1945	55.4777	0.528808	5.95351	30.1045	5.28089e-05	0.00592117	4.75683e-07	4.80149e-07	0.1	0.310247	0.0477856	0.87831	0.8985	0.0213116	0.0149306		51.8049	51.4054	48.3424	83.5004	66.3209	68.8512
ENSG00000105185	PDCD5	PC	programmed cell death 5		This gene encodes a protein that is upregulated during apoptosis where it translocates rapidly from the cytoplasm to the nucleus. The encoded protein may be an important regulator of K(lysine) acetyltransferase 5 (a protein involved in transcription, DNA damage response and cell cycle control) by inhibiting its proteasome-dependent degradation. Pseudogenes have been identified on chromosomes 5 an…	GO:0006915 (apoptotic process), GO:0008285 (negative regulation of cell proliferation), GO:0010628 (positive regulation of gene expression), GO:0043065 (positive regulation of apoptotic process), GO:0043280 (positive regulation of cysteine-type endopeptidase activity involved in apoptotic process), GO:0071560 (cellular response to transforming growth factor beta stimulus), GO:0090200 (positive re…		-0.119102	-0.183007	-0.268974		0.334406	0.196	0.0406771				295.961	95.8586	8.05015	0.38667	8.40578	30.0981	5.28686e-05	0.00592117	1.27398e-06	1.28593e-06	0.1	0.310247	0.0429809	0.87831	0.880702	0.0213116	0.0204991		308.432	294.982	277.802	423.096	384.209	344.789
ENSG00000113658	SMAD5	PC	SMAD family member 5		The protein encoded by this gene is involved in the transforming growth factor beta signaling pathway that results in an inhibition of the proliferation of hematopoietic progenitor cells. The encoded protein is activated by bone morphogenetic proteins type 1 receptor kinase, and may be involved in cancer. Alternative splicing results in multiple transcript variants. [provided by RefSeq, Feb 2014].	hsa04350 (TGF-beta signaling pathway), hsa04550 (Signaling pathways regulating pluripotency of stem cells), GO:0001657 (ureteric bud development), GO:0001880 (Mullerian duct regression), GO:0002051 (osteoblast fate commitment), GO:0006351 (transcription, DNA-templated), GO:0006468 (protein phosphorylation), GO:0007165 (signal transduction), GO:0007179 (transforming growth factor beta receptor sig…		-0.352277	-0.494254	-0.544865		0.766446	0.517905	0.107045				295.51	30.434	62.0147	1.16647	3.30084	30.0323	5.34862e-05	0.00592117	3.54954e-07	4.36475e-07	0.1	0.310247	0.0609411	0.87831	0.879601	0.0213116	0.0208714		6.52555	5.72651	5.46016	16.5136	13.5838	9.72174
ENSG00000111275	ALDH2	PC	aldehyde dehydrogenase 2 family member		This protein belongs to the aldehyde dehydrogenase family of proteins. Aldehyde dehydrogenase is the second enzyme of the major oxidative pathway of alcohol metabolism. Two major liver isoforms of aldehyde dehydrogenase, cytosolic and mitochondrial, can be distinguished by their electrophoretic mobilities, kinetic properties, and subcellular localizations. Most Caucasians have two major isozymes,…	hsa00010 (Glycolysis / Gluconeogenesis), hsa00053 (Ascorbate and aldarate metabolism), hsa00071 (Fatty acid degradation), hsa00280 (Valine, leucine and isoleucine degradation), hsa00310 (Lysine degradation), hsa00330 (Arginine and proline metabolism), hsa00340 (Histidine metabolism), hsa00380 (Tryptophan metabolism), hsa00410 (beta-Alanine metabolism), hsa00561 (Glycerolipid metabolism), hsa00620…		0.145771	0.264545	0.238719		-0.297314	-0.144287	-0.207433				295.315	76.9324	88.0761	-0.445107	6.08386	30.004	5.37543e-05	0.00592117	6.31577e-07	6.42453e-07	0.1	0.310247	0.00156843	-0.87831	-0.967972	0.0213116	0.00152223		74.0451	80.5706	79.1057	53.9357	60.1949	57.5314
ENSG00000128591	FLNC	PC	filamin C		This gene encodes one of three related filamin genes, specifically gamma filamin. These filamin proteins crosslink actin filaments into orthogonal networks in cortical cytoplasm and participate in the anchoring of membrane proteins for the actin cytoskeleton. Three functional domains exist in filamin: an N-terminal filamentous actin-binding domain, a C-terminal self-association domain, and a memb…	hsa04010 (MAPK signaling pathway), hsa04510 (Focal adhesion), hsa05132 (Salmonella infection), hsa05205 (Proteoglycans in cancer), GO:0034329 (cell junction assembly), GO:0048747 (muscle fiber development), GO:0005737 (cytoplasm), GO:0005829 (cytosol), GO:0005856 (cytoskeleton), GO:0005886 (plasma membrane), GO:0005925 (focal adhesion), GO:0016528 (sarcoplasm), GO:0030018 (Z disc), GO:0042383 (sa…		0.13913	0.265852	0.149965		-0.32835	-0.125544	-0.101052				294.758	99.0057	99.3688	-0.368202	10.2054	29.923	5.45312e-05	0.00595007	9.24443e-06	9.30926e-06	0.1	0.310247	0.0106444	-0.87831	-0.921858	0.0213116	0.00892067		1287.53	1405.92	1297.25	930.624	1071.39	1089.77
ENSG00000145425	RPS3A	PC	ribosomal protein S3A		Ribosomes, the organelles that catalyze protein synthesis, consist of a small 40S subunit and a large 60S subunit. Together these subunits are composed of 4 RNA species and approximately 80 structurally distinct proteins. This gene encodes a ribosomal protein that is a component of the 40S subunit. The protein belongs to the S3AE family of ribosomal proteins. It is located in the cytoplasm. Disru…	hsa03010 (Ribosome), GO:0000184 (nuclear-transcribed mRNA catabolic process, nonsense-mediated decay), GO:0006364 (rRNA processing), GO:0006412 (translation), GO:0006413 (translational initiation), GO:0006614 (SRP-dependent cotranslational protein targeting to membrane), GO:0019083 (viral transcription), GO:0030154 (cell differentiation), GO:0043066 (negative regulation of apoptotic process), GO:…		-0.14987	-0.342566	-0.150594		0.419187	0.133068	0.0907751				293.957	97.7953	12.0796	0.434876	9.21809	29.8066	5.56687e-05	0.00597698	1.48567e-06	1.49914e-06	0.1	0.310247	0.0550178	0.87831	0.850012	0.0213116	0.0320573		528.437	462.116	528.17	784.931	643.366	624.722
ENSG00000253729	PRKDC	PC	protein kinase, DNA-activated, catalytic polypeptide		This gene encodes the catalytic subunit of the DNA-dependent protein kinase (DNA-PK). It functions with the Ku70/Ku80 heterodimer protein in DNA double strand break repair and recombination. The protein encoded is a member of the PI3/PI4-kinase family.[provided by RefSeq, Jul 2010].	hsa03450 (Non-homologous end-joining), hsa04110 (Cell cycle), GO:0001756 (somitogenesis), GO:0001933 (negative regulation of protein phosphorylation), GO:0002326 (B cell lineage commitment), GO:0002328 (pro-B cell differentiation), GO:0002360 (T cell lineage commitment), GO:0002638 (negative regulation of immunoglobulin production), GO:0002684 (positive regulation of immune system process), GO:00…		-0.160462	-0.158167	-0.188882		0.238402	0.247953	0.0211558				293.857	96.2822	89.2953	0.343833	8.55185	29.7922	5.58113e-05	0.00597698	2.29319e-06	2.31449e-06	0.1	0.310247	0.0502315	0.87831	0.902865	0.0213116	0.0136945		332.537	333.07	326.011	439.077	442.006	377.417
ENSG00000152332	UHMK1	PC	U2AF homology motif kinase 1		The gene encodes a serine/threonine protein kinase that promotes cell cycle progression through G1 by phosphorylation of the cyclin-dependent kinase inhibitor 1B (p27Kip1), which causes nuclear export and degradation. The encoded protein is also thought to function in the adult nervous system and the gene has been associated with schizophrenia. Alternative splicing results in multiple transcript …	GO:0007050 (cell cycle arrest), GO:0018105 (peptidyl-serine phosphorylation), GO:0031175 (neuron projection development), GO:0045948 (positive regulation of translational initiation), GO:0046777 (protein autophosphorylation), GO:0046825 (regulation of protein export from nucleus), GO:0000243 (commitment complex), GO:0005634 (nucleus), GO:0005654 (nucleoplasm), GO:0005794 (Golgi apparatus), GO:001…		-0.469087	-0.397309	-0.263653		0.359031	0.616503	0.154515				293.122	44.9939	99.7147	0.858373	4.09327	29.6855	5.68812e-05	0.00601889	5.7522e-07	6.63091e-07	0.1	0.310247	0.0401394	0.87831	0.905229	0.0213116	0.0130467		11.0535	11.7194	13.0511	21.1748	25.7027	18.1117
ENSG00000162704	ARPC5	PC	actin related protein 2/3 complex subunit 5		This gene encodes one of seven subunits of the human Arp2/3 protein complex. The Arp2/3 protein complex has been implicated in the control of actin polymerization in cells and has been conserved through evolution. The exact role of the protein encoded by this gene, the p16 subunit, has yet to be determined. Alternatively spliced transcript variants encoding different isoforms have been observed f…	hsa04144 (Endocytosis), hsa04666 (Fc gamma R-mediated phagocytosis), hsa04810 (Regulation of actin cytoskeleton), hsa05100 (Bacterial invasion of epithelial cells), hsa05130 (Pathogenic Escherichia coli infection), hsa05131 (Shigellosis), hsa05132 (Salmonella infection), GO:0006928 (cellular component movement), GO:0014909 (smooth muscle cell migration), GO:0016477 (cell migration), GO:0021769 (o…		-0.395777	-0.350184	-0.141613		0.144341	0.47261	0.270623				292.556	64.4475	89.7795	0.626451	5.22582	29.6035	5.77186e-05	0.00601889	4.68703e-07	5.1118e-07	0.1	0.310247	0.0200817	0.87831	0.910933	0.0213116	0.0115462		27.0344	27.9667	32.6278	40.2187	51.0059	44.0808
ENSG00000177879	AP3S1	PC	adaptor related protein complex 3 subunit sigma 1			hsa04142 (Lysosome), GO:0006886 (intracellular protein transport), GO:0008089 (anterograde axon cargo transport), GO:0008286 (insulin receptor signaling pathway), GO:0048490 (anterograde synaptic vesicle transport), GO:0005794 (Golgi apparatus), GO:0030119 (AP-type membrane coat adaptor complex), GO:0030123 (AP-3 adaptor complex), GO:0030133 (transport vesicle), GO:0030659 (cytoplasmic vesicle me…		-0.418527	-0.132382	-0.278355		0.335243	0.442467	0.0515534				291.874	77.529	13.9991	0.573684	6.12298	29.5046	5.87471e-05	0.00601889	3.8777e-07	3.90174e-07	0.1	0.310247	0.0365963	0.87831	0.877688	0.0213116	0.0215256		50.2068	61.6598	55.5338	86.0308	92.8227	70.3162
ENSG00000120699	EXOSC8	PC	exosome component 8		This gene encodes a 3_-5_ exoribonuclease that specifically interacts with mRNAs containing AU-rich elements. The encoded protein is part of the exosome complex that is important for the degradation of numerous RNA species. A pseudogene of this gene is found on chromosome 6. [provided by RefSeq, Mar 2009].	hsa03018 (RNA degradation), GO:0006364 (rRNA processing), GO:0008150 (biological_process), GO:0043488 (regulation of mRNA stability), GO:0043928 (exonucleolytic nuclear-transcribed mRNA catabolic process involved in deadenylation-dependent decay), GO:0000178 (exosome (RNase complex)), GO:0005634 (nucleus), GO:0005654 (nucleoplasm), GO:0005730 (nucleolus), GO:0005737 (cytoplasm), GO:0005829 (cytos…		-0.130067	-0.203793	-0.14894		0.235158	0.124257	0.123384				291.302	92.305	14.2845	0.325697	7.65443	29.4219	5.96241e-05	0.00601889	2.01672e-06	2.04486e-06	0.1	0.310247	0.00727321	0.87831	0.961166	0.0213116	0.0022328		182.449	173.26	180.052	235.586	218.007	217.874
ENSG00000166557	TMED3	PC	transmembrane p24 trafficking protein 3			GO:0006888 (ER to Golgi vesicle-mediated transport), GO:0006890 (retrograde vesicle-mediated transport, Golgi to ER), GO:0015031 (protein transport), GO:0000139 (Golgi membrane), GO:0005783 (endoplasmic reticulum), GO:0005789 (endoplasmic reticulum membrane), GO:0005793 (endoplasmic reticulum-Golgi intermediate compartment), GO:0005794 (Golgi apparatus), GO:0016021 (integral component of membrane…		0.192825	0.18637	0.150343		-0.175729	-0.196668	-0.157141				291.201	84.4026	97.4146	-0.359911	6.69285	29.4072	5.97806e-05	0.00601889	1.38498e-06	1.41331e-06	0.1	0.310247	9.96498e-05	-0.87831	-0.994879	0.0213116	3.92646e-05		117.327	116.794	113.864	90.4255	89.0938	91.6241
ENSG00000136238	RAC1	PC	Rac family small GTPase 1		The protein encoded by this gene is a GTPase which belongs to the RAS superfamily of small GTP-binding proteins. Members of this superfamily appear to regulate a diverse array of cellular events, including the control of cell growth, cytoskeletal reorganization, and the activation of protein kinases. Two transcript variants encoding different isoforms have been found for this gene. [provided by R…	hsa04010 (MAPK signaling pathway), hsa04014 (Ras signaling pathway), hsa04015 (Rap1 signaling pathway), hsa04024 (cAMP signaling pathway), hsa04062 (Chemokine signaling pathway), hsa04071 (Sphingolipid signaling pathway), hsa04145 (Phagosome), hsa04151 (PI3K-Akt signaling pathway), hsa04310 (Wnt signaling pathway), hsa04360 (Axon guidance), hsa04370 (VEGF signaling pathway), hsa04380 (Osteoclast …		-0.113402	-0.155444	-0.199546		0.239675	0.11275	0.115967				290.75	94.6222	22.914	0.315324	8.1082	29.3421	6.04838e-05	0.00601889	2.73278e-06	2.76448e-06	0.1	0.310247	0.0106876	0.87831	0.94878	0.0213116	0.0038681		253.032	245.707	238.249	323.747	296.313	296.979
ENSG00000118816	CCNI	PC	cyclin I		The protein encoded by this gene belongs to the highly conserved cyclin family, whose members are characterized by a dramatic periodicity in protein abundance through the cell cycle. Cyclins function as regulators of CDK kinases. Different cyclins exhibit distinct expression and degradation patterns which contribute to the temporal coordination of each mitotic event. This cyclin shows the highest…	GO:0007283 (spermatogenesis), GO:0051726 (regulation of cell cycle)		-0.63436	-0.131886	-0.280742		0.594408	0.353018	0.0995615				290.658	74.6844	13.2036	0.721098	5.91104	29.3289	6.0627e-05	0.00601889	2.44688e-07	2.44392e-07	0.1	0.310247	0.0388294	0.87831	0.855408	0.0213116	0.0298489		36.3567	52.3376	47.0106	87.8952	74.0451	61.793
ENSG00000110046	ATG2A	PC	autophagy related 2A			hsa04136 (Autophagy - other), hsa04140 (Autophagy - animal), GO:0000045 (autophagic vacuole assembly), GO:0000422 (mitochondrion degradation), GO:0044804 (nucleophagy), GO:0000407 (pre-autophagosomal structure), GO:0005634 (nucleus), GO:0005811 (lipid particle), GO:0005829 (cytosol), GO:0019898 (extrinsic component of membrane), GO:0034045 (pre-autophagosomal structure membrane), GO:0043231 (intr…		0.165338	0.359191	0.238039		-0.337678	-0.323961	-0.10093				290.592	71.788	87.6438	-0.526273	5.7018	29.3193	6.0732e-05	0.00601889	6.08743e-07	6.15793e-07	0.1	0.310247	0.0057932	-0.87831	-0.937267	0.0213116	0.00577964		57.2651	65.7882	60.3281	39.8192	40.2187	47.277
ENSG00000104765	BNIP3L	PC	BCL2 interacting protein 3 like		This gene is a member of the BCL2/adenovirus E1B 19 kd-interacting protein (BNIP) family. It interacts with the E1B 19 kDa protein, which protects cells from virally-induced cell death. The encoded protein also interacts with E1B 19 kDa-like sequences of BCL2, another apoptotic protector. This protein counteracts the apoptotic inducer BNIP3 and may play a role in tumor suppression. [provided by R…	hsa04137 (Mitophagy - animal), GO:0010917 (negative regulation of mitochondrial membrane potential), GO:0016239 (positive regulation of macroautophagy), GO:0035694 (mitochondrial protein catabolic process), GO:0042981 (regulation of apoptotic process), GO:0043065 (positive regulation of apoptotic process), GO:0043066 (negative regulation of apoptotic process), GO:0051607 (defense response to viru…		-0.507327	-0.209051	-0.394879		0.370523	0.391582	0.349152				290.494	37.2644	40.9079	0.858757	3.67385	29.3052	6.08862e-05	0.00601889	6.52608e-07	7.80548e-07	0.1	0.310247	0.00607068	0.87831	0.982766	0.0213116	0.000442948		7.8573	10.1213	8.65635	16.1141	16.3805	15.8478
ENSG00000256028	AC026362.1	processed_transcript						0.152827	0.233572	0.208678		-0.17921	-0.221644	-0.194222				290.113	78.1601	98.9105	-0.408155	6.16598	29.2502	6.1491e-05	0.00602716	1.11988e-06	1.14422e-06	0.1	0.310247	0.00170023	-0.87831	-0.989335	0.0213116	0.000169996		78.9725	83.6336	82.1687	62.3257	60.4612	61.6598
ENSG00000164182	NDUFAF2	PC	NADH:ubiquinone oxidoreductase complex assembly factor 2		NADH:ubiquinone oxidoreductase (complex I) catalyzes the transfer of electrons from NADH to ubiquinone (coenzyme Q) in the first step of the mitochondrial respiratory chain, resulting in the translocation of protons across the inner mitochondrial membrane. This gene encodes a complex I assembly factor. Mutations in this gene cause progressive encephalopathy resulting from mitochondrial complex I …	hsa04714 (Thermogenesis), GO:0022904 (respiratory electron transport chain), GO:0032981 (mitochondrial respiratory chain complex I assembly), GO:0045333 (cellular respiration), GO:0061179 (negative regulation of insulin secretion involved in cellular response to glucose stimulus), GO:0072593 (reactive oxygen species metabolic process), GO:0005739 (mitochondrion), GO:0005743 (mitochondrial inner m…		-0.205972	-0.211841	-0.194307		0.318512	0.0360812	0.257526				288.788	85.5265	6.87419	0.420437	6.82214	29.0591	6.36472e-05	0.00617678	1.03802e-06	1.05295e-06	0.1	0.310247	0.0498469	0.87831	0.906426	0.0213116	0.0127245		96.4184	96.0189	97.2174	139.567	114.397	133.707
ENSG00000149187	CELF1	PC	CUGBP Elav-like family member 1		Members of the CELF/BRUNOL protein family contain two N-terminal RNA recognition motif (RRM) domains, one C-terminal RRM domain, and a divergent segment of 160-230 aa between the second and third RRM domains. Members of this protein family regulate pre-mRNA alternative splicing and may also be involved in mRNA editing, and translation. This gene may play a role in myotonic dystrophy type 1 (DM1) …	GO:0006376 (mRNA splice site selection), GO:0006397 (mRNA processing), GO:0007281 (germ cell development), GO:0009790 (embryo development), GO:0016246 (RNA interference), GO:0017148 (negative regulation of translation), GO:0043484 (regulation of RNA splicing), GO:0005634 (nucleus), GO:0005654 (nucleoplasm), GO:0005737 (cytoplasm), GO:0016020 (membrane), GO:0030529 (ribonucleoprotein complex), GO:…		-0.222594	-0.222594	-0.311057		0.371247	0.132187	0.252811				288.74	66.5053	50.3156	0.532224	5.34956	28.7521	6.7291e-05	0.00627651	1.09122e-06	1.18569e-06	0.0765225	0.310247	0.0182849	0.891133	0.947765	0.017133	0.00402156		33.8263	33.8263	31.6955	52.0713	43.8144	47.8097
ENSG00000106771	TMEM245	PC	transmembrane protein 245			GO:0008150 (biological_process), GO:0016021 (integral component of membrane), GO:0003674 (molecular_function)		-0.319998	-0.173385	-0.402848		0.427615	0.38709	0.0815268				288.326	62.8394	92.0536	0.637957	5.12665	28.9925	6.44176e-05	0.00617678	6.33284e-07	6.92525e-07	0.1	0.310247	0.0283285	0.87831	0.907289	0.0213116	0.0124944		26.6349	29.6979	25.0368	46.0784	44.7467	35.824
ENSG00000123989	CHPF	PC	chondroitin polymerizing factor			hsa00532 (Glycosaminoglycan biosynthesis - chondroitin sulfate / dermatan sulfate), hsa01100 (Metabolic pathways), GO:0030206 (chondroitin sulfate biosynthetic process), GO:0000139 (Golgi membrane), GO:0005759 (mitochondrial matrix), GO:0005829 (cytosol), GO:0016021 (integral component of membrane), GO:0032580 (Golgi cisterna membrane), GO:0046872 (metal ion binding), GO:0047238 (glucuronosyl-N-a…		0.254324	0.215621	0.202486		-0.383556	-0.186387	-0.102488				288.206	79.1371	79.2218	-0.45564	6.23307	28.9752	6.46196e-05	0.00617678	7.29277e-07	7.40473e-07	0.1	0.310247	0.0185362	-0.87831	-0.951068	0.0213116	0.0035329		88.5611	86.1639	85.3649	56.1997	64.7228	68.7181
ENSG00000166250	CLMP	PC	CXADR like membrane protein		The CTX (see VSIG2, MIM 606011) family of proteins, including ASAM, are type I transmembrane proteins within the Ig superfamily that localize to junctional complexes between endothelial and epithelial cells and may play a role in cell-cell adhesion (Raschperger et al., 2004 [PubMed 14573622]).[supplied by OMIM, Mar 2008]. Publication Note: This RefSeq record includes a subset of the publications …	GO:0048565 (digestive tract development), GO:0005881 (cytoplasmic microtubule), GO:0005886 (plasma membrane), GO:0005923 (tight junction), GO:0009986 (cell surface), GO:0016021 (integral component of membrane), GO:0070062 (extracellular vesicular exosome)		-0.335253	-0.322544	-0.322544		0.473826	0.210818	0.295698				287.538	45.9104	65.1275	0.735261	4.15209	28.581	6.94243e-05	0.00642369	1.37454e-06	1.57987e-06	0.0765225	0.310247	0.0213214	0.891133	0.958425	0.017133	0.00255682		13.0511	13.1843	13.1843	24.3709	19.9762	21.3079
ENSG00000234818	AC007314.1	antisense						-0.329117	-0.645495	-0.329117		0.692379	0.326786	0.284565				286.996	30.5551	5.49935	1.06837	3.30733	28.5038	7.0412e-05	0.00646337	6.36409e-07	7.80108e-07	0.0765225	0.310247	0.0263124	0.891133	0.914015	0.017133	0.0107723		6.7919	5.06063	6.7919	15.8478	11.8525	11.453
ENSG00000154723	ATP5PF	PC	ATP synthase peripheral stalk subunit F6		Mitochondrial ATP synthase catalyzes ATP synthesis, utilizing an electrochemical gradient of protons across the inner membrane during oxidative phosphorylation. It is composed of two linked multi-subunit complexes: the soluble catalytic core, F1, and the membrane-spanning component, Fo, which comprises the proton channel. The F1 complex consists of 5 different subunits (alpha, beta, gamma, delta,…	hsa00190 (Oxidative phosphorylation), hsa01100 (Metabolic pathways), hsa04714 (Thermogenesis), hsa05010 (Alzheimer disease), hsa05012 (Parkinson disease), hsa05016 (Huntington disease), GO:0006754 (ATP biosynthetic process), GO:0021762 (substantia nigra development), GO:0042776 (mitochondrial ATP synthesis coupled proton transport), GO:0000276 (mitochondrial proton-transporting ATP synthase compl…		-0.0945741	-0.180539	-0.218752		0.255174	0.148908	0.0897826				286.915	93.9391	10.5577	0.332596	7.95648	28.7895	6.68349e-05	0.00627651	2.64517e-06	2.6767e-06	0.1	0.310247	0.0111002	0.87831	0.932868	0.0213116	0.0066088		230.525	217.075	211.348	294.316	273.274	262.221
ENSG00000068366	ACSL4	PC	acyl-CoA synthetase long chain family member 4		The protein encoded by this gene is an isozyme of the long-chain fatty-acid-coenzyme A ligase family. Although differing in substrate specificity, subcellular localization, and tissue distribution, all isozymes of this family convert free long-chain fatty acids into fatty acyl-CoA esters, and thereby play a key role in lipid biosynthesis and fatty acid degradation. This isozyme preferentially uti…	hsa00061 (Fatty acid biosynthesis), hsa00071 (Fatty acid degradation), hsa01100 (Metabolic pathways), hsa01212 (Fatty acid metabolism), hsa03320 (PPAR signaling pathway), hsa04146 (Peroxisome), hsa04216 (Ferroptosis), hsa04714 (Thermogenesis), hsa04920 (Adipocytokine signaling pathway), GO:0001676 (long-chain fatty acid metabolic process), GO:0006629 (lipid metabolic process), GO:0006641 (triglyc…		-0.34389	-0.288891	-0.222107		0.573396	0.195489	0.0860034				286.864	76.258	64.4877	0.602899	6.02754	28.7822	6.69231e-05	0.00627651	5.17801e-07	5.20921e-07	0.1	0.310247	0.0847491	0.87831	0.84086	0.0213116	0.035973		49.4078	51.4054	53.9357	95.0866	72.7133	67.2531
ENSG00000152558	TMEM123	PC	transmembrane protein 123		This gene encodes a highly glycosylated transmembrane protein with a high content of threonine and serine residues in its extracellular domain, similar to a broadly defined category of proteins termed mucins. Exposure of some cell types to anti-PORIMIN (pro-oncosis receptor inducing membrane injury) antibody, crosslinks this protein on the cell surface and induces a type of cell death termed onco…	GO:0070267 (oncosis), GO:0009897 (external side of plasma membrane), GO:0016021 (integral component of membrane), GO:0004872 (receptor activity), GO:0005515 (protein binding)		-0.331756	-0.218033	-0.186828		0.368318	0.380869	-0.0125692				284.592	84.757	41.9801	0.51047	6.73615	28.4563	7.10271e-05	0.0064685	7.63632e-07	7.71809e-07	0.1	0.310247	0.0672354	0.87831	0.858015	0.0213116	0.0288086		82.435	89.3601	91.3577	135.172	136.371	103.343
ENSG00000071894	CPSF1	PC	cleavage and polyadenylation specific factor 1		Cleavage and polyadenylation specificity factor (CPSF) is a multisubunit complex that plays a central role in 3-prime processing of pre-mRNAs. CPSF recognizes the AAUAAA signal in the pre-mRNA and interacts with other proteins to facilitate both RNA cleavage and poly(A) synthesis. CPSF1 is the largest subunit of the CPSF complex (Murthy and Manley, 1995 [PubMed 7590244]).[supplied by OMIM, Mar 20…	hsa03015 (mRNA surveillance pathway), GO:0000398 (mRNA splicing, via spliceosome), GO:0006369 (termination of RNA polymerase II transcription), GO:0006378 (mRNA polyadenylation), GO:0006379 (mRNA cleavage), GO:0006388 (tRNA splicing, via endonucleolytic cleavage and ligation), GO:0006406 (mRNA export from nucleus), GO:0031124 (mRNA 3'-end processing), GO:0098789 (NA), GO:0005654 (nucleoplasm), GO…		0.174989	0.161346	0.152179		-0.188546	-0.0982612	-0.201707				284.009	89.2184	36.3684	-0.32932	7.2256	28.3729	7.2123e-05	0.00651699	2.48433e-06	2.52771e-06	0.1	0.310247	0.00553493	-0.87831	-0.983153	0.0213116	0.000423329		167.8	166.202	165.136	129.978	138.502	128.78
ENSG00000148248	SURF4	PC	surfeit 4		This gene is located in the surfeit gene cluster, which is comprised of very tightly linked housekeeping genes that do not share sequence similarity. The encoded protein is a conserved integral membrane protein that interacts with endoplasmic reticulum-Golgi intermediate compartment proteins. Disruption of this gene results in reduced numbers of endoplasmic reticulum-Golgi intermediate compartmen…	GO:0006890 (retrograde vesicle-mediated transport, Golgi to ER), GO:0007030 (Golgi organization), GO:0010638 (positive regulation of organelle organization), GO:0043312 (neutrophil degranulation), GO:0000139 (Golgi membrane), GO:0005789 (endoplasmic reticulum membrane), GO:0005793 (endoplasmic reticulum-Golgi intermediate compartment), GO:0005886 (plasma membrane), GO:0016021 (integral component …		0.126567	0.144076	0.128328		-0.146009	-0.134353	-0.118609				283.554	96.5329	64.8076	-0.267287	8.64246	28.3078	7.29904e-05	0.00654424	7.78807e-06	7.8664e-06	0.1	0.310247	1.2249e-05	-0.87831	-0.997475	0.0213116	9.5522e-06		434.282	439.609	434.815	359.172	362.102	366.097
ENSG00000136450	SRSF1	PC	serine and arginine rich splicing factor 1		This gene encodes a member of the arginine/serine-rich splicing factor protein family, and functions in both constitutive and alternative pre-mRNA splicing. The protein binds to pre-mRNA transcripts and components of the spliceosome, and can either activate or repress splicing depending on the location of the pre-mRNA binding site. The protein_s ability to activate splicing is regulated by phosph…	hsa03040 (Spliceosome), hsa04657 (IL-17 signaling pathway), hsa05168 (Herpes simplex infection), GO:0000380 (alternative mRNA splicing, via spliceosome), GO:0000395 (mRNA 5'-splice site recognition), GO:0000398 (mRNA splicing, via spliceosome), GO:0001701 (in utero embryonic development), GO:0006369 (termination of RNA polymerase II transcription), GO:0006376 (mRNA splice site selection), GO:0006…		-0.133351	-0.268581	-0.33308		0.532152	0.115203	0.0876579				283.245	96.3168	41.6429	0.505053	8.55738	28.2637	7.35858e-05	0.00654687	1.08134e-06	1.09306e-06	0.1	0.310247	0.0963407	0.87831	0.805886	0.0213116	0.0528635		335.866	305.636	292.185	533.897	399.39	391.8
ENSG00000203485	INF2	PC	inverted formin, FH2 and WH2 domain containing		This gene represents a member of the formin family of proteins. It is considered a diaphanous formin due to the presence of a diaphanous inhibitory domain located at the N-terminus of the encoded protein. Studies of a similar mouse protein indicate that the protein encoded by this locus may function in polymerization and depolymerization of actin filaments. Mutations at this locus have been assoc…	GO:0030036 (actin cytoskeleton organization), GO:0090140 (regulation of mitochondrial fission), GO:0048471 (perinuclear region of cytoplasm), GO:0003779 (actin binding), GO:0017048 (Rho GTPase binding)		0.0551829	0.351996	0.365069		-0.395617	-0.0901733	-0.286458				282.27	80.2352	84.9892	-0.529271	6.32461	28.1244	7.55003e-05	0.00666593	7.84652e-07	7.93011e-07	0.1	0.310247	0.0265024	-0.87831	-0.881553	0.0213116	0.0202136		81.3697	100.414	101.346	58.9963	73.3792	63.7906
ENSG00000132356	PRKAA1	PC	protein kinase AMP-activated catalytic subunit alpha 1		The protein encoded by this gene belongs to the ser/thr protein kinase family. It is the catalytic subunit of the 5_-prime-AMP-activated protein kinase (AMPK). AMPK is a cellular energy sensor conserved in all eukaryotic cells. The kinase activity of AMPK is activated by the stimuli that increase the cellular AMP/ATP ratio. AMPK regulates the activities of a number of key metabolic enzymes throug…	hsa04068 (FoxO signaling pathway), hsa04140 (Autophagy - animal), hsa04150 (mTOR signaling pathway), hsa04151 (PI3K-Akt signaling pathway), hsa04152 (AMPK signaling pathway), hsa04211 (Longevity regulating pathway), hsa04213 (Longevity regulating pathway - multiple species), hsa04371 (Apelin signaling pathway), hsa04530 (Tight junction), hsa04710 (Circadian rhythm), hsa04714 (Thermogenesis), hsa0…		-0.434015	-0.457855	-0.457855		0.733045	0.589229	0.0274494				281.543	30.6934	46.7704	1.13919	3.31378	27.7314	8.1213e-05	0.00700978	9.58285e-07	1.16486e-06	0.0765225	0.310247	0.0755197	0.891133	0.863684	0.017133	0.0266064		6.12603	5.99285	5.99285	16.2473	14.516	9.18904
ENSG00000080986	NDC80	PC	NDC80, kinetochore complex component		This gene encodes a component of the NDC80 kinetochore complex. The encoded protein consists of an N-terminal microtubule binding domain and a C-terminal coiled-coiled domain that interacts with other components of the complex. This protein functions to organize and stabilize microtubule-kinetochore interactions and is required for proper chromosome segregation. [provided by RefSeq, Oct 2011]. Pu…	GO:0000070 (mitotic sister chromatid segregation), GO:0000132 (establishment of mitotic spindle orientation), GO:0007052 (mitotic spindle organization), GO:0007059 (chromosome segregation), GO:0007062 (sister chromatid cohesion), GO:0007067 (mitotic nuclear division), GO:0008608 (attachment of spindle microtubules to kinetochore), GO:0051301 (cell division), GO:0051310 (metaphase plate congressio…		-0.077804	-0.306364	-0.258668		0.357774	0.0696069	0.215455				280.566	88.3279	18.3744	0.43626	7.10192	27.8816	7.89749e-05	0.00691988	1.40853e-06	1.42662e-06	0.1	0.310247	0.0262229	0.87831	0.883985	0.0213116	0.0194085		127.981	108.937	112.666	173.793	141.964	157.279
ENSG00000274177	AC004528.2	antisense						0.279385	0.372173	0.185609		-0.404698	-0.159355	-0.273114				279.587	59.5366	2.71509	-0.594405	4.92111	27.7423	8.10487e-05	0.00700978	1.38133e-06	1.52509e-06	0.1	0.310247	0.00319103	-0.87831	-0.954533	0.0213116	0.00305385		36.0903	38.6206	33.6932	21.7075	26.1022	23.9714
ENSG00000067167	TRAM1	PC	translocation associated membrane protein 1		This gene encodes a multi-pass membrane protein that is part of the mammalian endoplasmic reticulum. The encoded protein influences glycosylation and facilitates the translocation of secretory proteins across the endoplasmic reticulum membrane by regulating which domains of the nascent polypeptide chain are visible to the cytosol during a translocational pause. [provided by RefSeq, Oct 2009]. Seq…	hsa04141 (Protein processing in endoplasmic reticulum), GO:0006613 (cotranslational protein targeting to membrane), GO:0016032 (viral process), GO:0005783 (endoplasmic reticulum), GO:0005789 (endoplasmic reticulum membrane), GO:0016021 (integral component of membrane), GO:0004872 (receptor activity), GO:0005515 (protein binding), R-HSA-1799339 (Homo sapiens: SRP-dependent cotranslational protein …		-0.553266	-0.292542	-0.327025		0.589046	0.570431	0.0133556				278.439	49.1268	59.8011	0.88623	4.32181	27.5793	8.35548e-05	0.00715848	8.94551e-07	1.01082e-06	0.1	0.310247	0.0643061	0.87831	0.861585	0.0213116	0.0274122		12.1189	14.9156	14.516	29.1652	28.7657	18.9108
ENSG00000183751	TBL3	PC	transducin beta like 3		The protein encoded by this gene has sequence similarity with members of the WD40 repeat-containing protein family. The WD40 group is a large family of proteins, which appear to have a regulatory function. It is believed that the WD40 repeats mediate protein-protein interactions and members of the family are involved in signal transduction, RNA processing, gene regulation, vesicular trafficking, …	hsa03008 (Ribosome biogenesis in eukaryotes), GO:0000462 (maturation of SSU-rRNA from tricistronic rRNA transcript (SSU-rRNA, 5.8S rRNA, LSU-rRNA)), GO:0006364 (rRNA processing), GO:0005634 (nucleus), GO:0005654 (nucleoplasm), GO:0005730 (nucleolus), GO:0032040 (small-subunit processome), GO:0034388 (Pwp2p-containing subcomplex of 90S preribosome), GO:0003723 (RNA binding), GO:0005515 (protein bi…		0.0544216	0.285102	0.328548		-0.323001	-0.119548	-0.225524				275.705	81.2813	77.6567	-0.458528	6.41482	27.1923	8.98626e-05	0.00764228	1.68715e-06	1.71374e-06	0.1	0.310247	0.0255415	-0.87831	-0.900022	0.0213116	0.0144937		87.0962	102.544	105.741	66.5873	76.9749	71.3816
ENSG00000188739	RBM34	PC	RNA binding motif protein 34			GO:0005634 (nucleus), GO:0005730 (nucleolus), GO:0003723 (RNA binding)		-0.228813	-0.17081	-0.20315		0.205498	0.197262	0.200013				275.414	74.5461	16.0484	0.415234	5.90035	27.151	9.05659e-05	0.00764588	2.63301e-06	2.70269e-06	0.1	0.310247	0.000930189	0.87831	0.997284	0.0213116	1.1053e-05		49.9405	52.0713	50.8727	68.1854	67.7858	67.919
ENSG00000085491	SLC25A24	PC	solute carrier family 25 member 24		This gene encodes a carrier protein that transports ATP-Mg exchanging it for phosphate. Multiple transcript variants encoding different isoforms have been found for this gene. [provided by RefSeq, May 2012].	GO:0006839 (mitochondrial transport), GO:0010941 (regulation of cell death), GO:0015866 (ADP transport), GO:0015867 (ATP transport), GO:0034599 (cellular response to oxidative stress), GO:0055085 (transmembrane transport), GO:0071277 (cellular response to calcium ion), GO:0005739 (mitochondrion), GO:0005743 (mitochondrial inner membrane), GO:0016021 (integral component of membrane), GO:0005347 (A…		-0.417443	-0.545428	-0.350959		0.724868	0.668289	-0.0793255				274.506	46.9047	92.8491	1.02555	4.20166	27.023	9.2789e-05	0.0077768	8.68352e-07	9.87096e-07	0.1	0.310247	0.098157	0.87831	0.822122	0.0213116	0.0446467		12.1189	10.9203	12.7848	29.1652	27.9667	15.8478
ENSG00000088205	DDX18	PC	DEAD-box helicase 18		DEAD box proteins, characterized by the conserved motif Asp-Glu-Ala-Asp (DEAD), are putative RNA helicases. They are implicated in a number of cellular processes involving alteration of RNA secondary structure such as translation initiation, nuclear and mitochondrial splicing, and ribosome and spliceosome assembly. Based on their distribution patterns, some members of this family are believed to …	GO:0010501 (RNA secondary structure unwinding), GO:0071392 (cellular response to estradiol stimulus), GO:0005694 (chromosome), GO:0005730 (nucleolus), GO:0016020 (membrane), GO:0003723 (RNA binding), GO:0004004 (ATP-dependent RNA helicase activity), GO:0005515 (protein binding), GO:0005524 (ATP binding)		-0.0892016	-0.230721	-0.325515		0.249256	0.265048	0.131133				271.252	77.7711	75.9101	0.440523	6.13806	26.5651	0.000101259	0.00842564	2.2951e-06	2.34129e-06	0.1	0.310247	0.005645	0.87831	0.941774	0.0213116	0.00498676		64.9892	58.73	54.8679	82.7014	83.6336	76.0427
ENSG00000173145	NOC3L	PC	NOC3 like DNA replication regulator			GO:0045444 (fat cell differentiation), GO:0005634 (nucleus), GO:0005730 (nucleolus), GO:0005739 (mitochondrion), GO:0016607 (nuclear speck), GO:0003682 (chromatin binding), GO:0003723 (RNA binding)		-0.257838	-0.309116	-0.164734		0.417338	0.15374	0.16061				270.969	70.5257	75.3999	0.512174	5.62277	26.5254	0.000102034	0.0084295	2.35871e-06	2.40299e-06	0.1	0.310247	0.0321977	0.87831	0.91128	0.0213116	0.0114576		39.9524	38.4874	42.749	64.9892	53.8025	54.0689
ENSG00000144118	RALB	PC	RAS like proto-oncogene B		This gene encodes a GTP-binding protein that belongs to the small GTPase superfamily and Ras family of proteins. GTP-binding proteins mediate the transmembrane signaling initiated by the occupancy of certain cell surface receptors. [provided by RefSeq, Jul 2008]. Publication Note: This RefSeq record includes a subset of the publications that are available for this gene. Please see the Gene record…	hsa04014 (Ras signaling pathway), hsa04015 (Rap1 signaling pathway), hsa04072 (Phospholipase D signaling pathway), hsa05200 (Pathways in cancer), hsa05210 (Colorectal cancer), hsa05212 (Pancreatic cancer), GO:0000910 (cytokinesis), GO:0001928 (regulation of exocyst assembly), GO:0001934 (positive regulation of protein phosphorylation), GO:0006915 (apoptotic process), GO:0007165 (signal transducti…		-0.205996	-0.23765	-0.17738		0.320796	0.273212	0.0270174				270.084	82.5177	30.1427	0.428693	6.51486	26.4014	0.000104497	0.00845036	2.79414e-06	2.84352e-06	0.1	0.310247	0.0513595	0.87831	0.897838	0.0213116	0.0151225		77.7739	76.0427	79.372	112.932	109.203	91.7573
ENSG00000160949	TONSL	PC	tonsoku like, DNA repair protein		The protein encoded by this gene is thought to be a negative regulator of NF-kappa-B mediated transcription. The encoded protein may bind NF-kappa-B complexes and trap them in the cytoplasm, preventing them from entering the nucleus and interacting with the DNA. Phosphorylation of this protein targets it for degradation by the ubiquitination pathway, which frees the NF-kappa-B complexes to enter …	GO:0000724 (double-strand break repair via homologous recombination), GO:0031297 (replication fork processing), GO:0042994 (cytoplasmic sequestering of transcription factor), GO:1903507 (negative regulation of nucleic acid-templated transcription), GO:0005654 (nucleoplasm), GO:0005662 (DNA replication factor A complex), GO:0005737 (cytoplasm), GO:0016604 (nuclear body), GO:0035101 (FACT complex),…		0.199053	0.225977	0.212578		-0.315179	-0.264332	-0.0580969				269.971	78.6097	96.7402	-0.4324	6.19118	26.3856	0.000104817	0.00845036	2.40052e-06	2.44939e-06	0.1	0.310247	0.0243796	-0.87831	-0.949215	0.0213116	0.00380316		82.8346	84.4327	83.6336	57.3982	59.529	68.9844
ENSG00000161011	SQSTM1	PC	sequestosome 1		This gene encodes a multifunctional protein that binds ubiquitin and regulates activation of the nuclear factor kappa-B (NF-kB) signaling pathway. The protein functions as a scaffolding/adaptor protein in concert with TNF receptor-associated factor 6 to mediate activation of NF-kB in response to upstream signals. Alternatively spliced transcript variants encoding either the same or different isof…	hsa04137 (Mitophagy - animal), hsa04217 (Necroptosis), hsa04218 (Cellular senescence), hsa04380 (Osteoclast differentiation), hsa05418 (Fluid shear stress and atherosclerosis), GO:0000122 (negative regulation of transcription from RNA polymerase II promoter), GO:0000422 (mitochondrion degradation), GO:0000423 (macromitophagy), GO:0001934 (positive regulation of protein phosphorylation), GO:000237…		0.119783	0.238942	0.125364		-0.289936	-0.125624	-0.0685306				269.903	97.0085	31.9153	-0.322208	8.79551	26.3761	0.000105008	0.00845036	9.53619e-06	9.62085e-06	0.1	0.310247	0.0137464	-0.87831	-0.910395	0.0213116	0.0116838		479.029	520.446	480.893	360.104	403.785	420.166
ENSG00000113328	CCNG1	PC	cyclin G1		The eukaryotic cell cycle is governed by cyclin-dependent protein kinases (CDKs) whose activities are regulated by cyclins and CDK inhibitors. The protein encoded by this gene is a member of the cyclin family and contains the cyclin box. The encoded protein lacks the protein destabilizing (PEST) sequence that is present in other family members. Transcriptional activation of this gene can be induc…	hsa04115 (p53 signaling pathway), hsa05206 (MicroRNAs in cancer), GO:0000079 (regulation of cyclin-dependent protein serine/threonine kinase activity), GO:0007067 (mitotic nuclear division), GO:0051301 (cell division), GO:0005654 (nucleoplasm), GO:0005515 (protein binding), R-HSA-212436 (Homo sapiens: Generic Transcription Pathway), R-HSA-3700989 (Homo sapiens: Transcriptional Regulation by TP53)…		-0.477745	-0.196974	-0.39662		0.29679	0.64767	0.12688				269.55	51.0375	21.5305	0.796684	4.43272	26.3266	0.000106016	0.00845036	1.8482e-06	2.06938e-06	0.1	0.310247	0.0565667	0.87831	0.865215	0.0213116	0.0260262		14.1165	17.579	15.0487	25.5695	33.1605	22.5065
ENSG00000151694	ADAM17	PC	ADAM metallopeptidase domain 17		This gene encodes a member of the ADAM (a disintegrin and metalloprotease domain) family. Members of this family are membrane-anchored proteins structurally related to snake venom disintegrins, and have been implicated in a variety of biologic processes involving cell-cell and cell-matrix interactions, including fertilization, muscle development, and neurogenesis. The protein encoded by this gene…	hsa04330 (Notch signaling pathway), hsa05010 (Alzheimer disease), hsa05120 (Epithelial cell signaling in Helicobacter pylori infection), GO:0001666 (response to hypoxia), GO:0001934 (positive regulation of protein phosphorylation), GO:0002446 (neutrophil mediated immunity), GO:0002467 (germinal center formation), GO:0002690 (positive regulation of leukocyte chemotaxis), GO:0006508 (proteolysis), …		-0.217328	-0.227451	-0.411402		0.499282	0.31626	0.0406386				269.415	67.9059	80.2594	0.607501	5.44894	26.3077	0.000106402	0.00845036	1.7135e-06	1.84099e-06	0.1	0.310247	0.0564348	0.87831	0.86726	0.0213116	0.0252604		36.0903	35.824	31.296	60.5944	53.1366	43.5481
ENSG00000258644	SYNJ2BP-COX16	PC	SYNJ2BP-COX16 readthrough		This locus represents naturally occurring read-through transcription between the neighboring SYNJ2BP (synaptojanin 2 binding protein) and COX16 (COX16 cytochrome c oxidase assembly homolog (S. cerevisiae)) genes on chromosome 14. The read-through transcript produces a fusion protein that shares sequence identity with each individual gene product. Alternate splicing results in multiple transcript …			-0.190638	-0.284519	-0.247839		0.51543	0.125858	0.0817075				269.221	85.6822	6.36403	0.503827	6.83145	26.2806	0.000106961	0.00845036	1.91833e-06	1.94261e-06	0.1	0.310247	0.0973517	0.87831	0.822716	0.0213116	0.0443583		97.3506	91.0914	93.4885	160.076	121.722	117.993
ENSG00000213281	NRAS	PC	NRAS proto-oncogene, GTPase		This is an N-ras oncogene encoding a membrane protein that shuttles between the Golgi apparatus and the plasma membrane. This shuttling is regulated through palmitoylation and depalmitoylation by the ZDHHC9-GOLGA7 complex. The encoded protein, which has intrinsic GTPase activity, is activated by a guanine nucleotide-exchange factor and inactivated by a GTPase activating protein. Mutations in this…	hsa01521 (EGFR tyrosine kinase inhibitor resistance), hsa01522 (Endocrine resistance), hsa04010 (MAPK signaling pathway), hsa04012 (ErbB signaling pathway), hsa04014 (Ras signaling pathway), hsa04015 (Rap1 signaling pathway), hsa04062 (Chemokine signaling pathway), hsa04068 (FoxO signaling pathway), hsa04071 (Sphingolipid signaling pathway), hsa04072 (Phospholipase D signaling pathway), hsa04137 …		-0.210225	-0.334734	-0.306564		0.585874	0.204796	0.0608526				268.892	74.4769	97.1379	0.604183	5.89498	26.2345	0.000107919	0.00845036	1.51066e-06	1.52636e-06	0.1	0.310247	0.0936211	0.87831	0.826429	0.0213116	0.0425758		49.5409	45.2793	46.2116	87.4957	66.7205	60.1949
ENSG00000160932	LY6E	PC	lymphocyte antigen 6 family member E			GO:0006501 (C-terminal protein lipidation), GO:0007166 (cell surface receptor signaling pathway), GO:0005576 (extracellular region), GO:0005886 (plasma membrane), GO:0005887 (integral component of plasma membrane), GO:0031225 (anchored component of membrane), R-HSA-163125 (Homo sapiens: Post-translational modification: synthesis of GPI-anchored proteins), R-HSA-392499 (Homo sapiens: Metabolism of…		0.121123	0.288328	0.127832		-0.306189	-0.0500236	-0.18107				268.819	94.9421	18.677	-0.358958	8.18018	26.2243	0.000108132	0.00845036	5.47301e-06	5.53191e-06	0.1	0.310247	0.0170307	-0.87831	-0.891614	0.0213116	0.0169847		312.294	350.915	313.759	231.724	277.136	252.898
ENSG00000050820	BCAR1	PC	BCAR1, Cas family scaffold protein		BCAR1, or CAS, is an Src (MIM 190090) family kinase substrate involved in various cellular events, including migration, survival, transformation, and invasion (Sawada et al., 2006 [PubMed 17129785]).[supplied by OMIM, May 2009].	hsa04015 (Rap1 signaling pathway), hsa04062 (Chemokine signaling pathway), hsa04510 (Focal adhesion), hsa04670 (Leukocyte transendothelial migration), hsa04810 (Regulation of actin cytoskeleton), hsa05100 (Bacterial invasion of epithelial cells), hsa05163 (Human cytomegalovirus infection), GO:0001558 (regulation of cell growth), GO:0007015 (actin filament organization), GO:0007155 (cell adhesion)…		0.0765944	0.272465	0.217617		-0.3282	-0.166491	-0.0719861				268.037	91.4058	71.3186	-0.380394	7.5194	26.1151	0.000110444	0.00857316	3.96066e-06	4.01322e-06	0.1	0.310247	0.014934	-0.87831	-0.898499	0.0213116	0.0149309		191.239	219.338	211.082	143.962	161.274	172.328
ENSG00000100991	TRPC4AP	PC	transient receptor potential cation channel subfamily C member 4 associated protein			GO:0006511 (ubiquitin-dependent protein catabolic process), GO:0016567 (protein ubiquitination), GO:0048820 (hair follicle maturation), GO:0070588 (calcium ion transmembrane transport), GO:0005886 (plasma membrane), GO:0031464 (Cul4A-RING E3 ubiquitin ligase complex), GO:0005262 (calcium channel activity), GO:0005515 (protein binding), GO:0019902 (phosphatase binding), R-HSA-2672351 (Homo sapiens…		0.156441	0.15128	0.164149		-0.173554	-0.186566	-0.11175				267.566	87.9734	91.5694	-0.318955	7.05429	26.0494	0.000111863	0.00860075	6.14439e-06	6.26944e-06	0.1	0.310247	0.00327362	-0.87831	-0.991009	0.0213116	0.000120899		147.158	146.625	147.957	116.661	115.596	121.855
ENSG00000160072	ATAD3B	PC	ATPase family, AAA domain containing 3B		ATAD3A (MIM 612316) and ATAD3B are mitochondrial membrane proteins that contribute to the stabilization of large mitochondrial DNA (mtDNA)-protein complexes called nucleoids (He et al., 2007 [PubMed 17210950]).[supplied by OMIM, Sep 2008].	GO:0043312 (neutrophil degranulation), GO:0005739 (mitochondrion), GO:0005743 (mitochondrial inner membrane), GO:0005886 (plasma membrane), GO:0030667 (secretory granule membrane), GO:0101003 (NA), GO:0005524 (ATP binding), R-HSA-168249 (Homo sapiens: Innate Immune System), R-HSA-168256 (Homo sapiens: Immune System), R-HSA-6798695 (Homo sapiens: Neutrophil degranulation)		0.0623812	0.38196	0.347272		-0.323126	-0.119738	-0.34875				267.405	69.1855	87.4189	-0.554276	5.54123	26.027	0.000112352	0.00860075	2.16214e-06	2.31794e-06	0.1	0.310247	0.027058	-0.87831	-0.895698	0.0213116	0.0157509		47.4101	59.6622	58.1973	35.824	41.5505	35.1581
ENSG00000185803	SLC52A2	PC	solute carrier family 52 member 2		This gene encodes a membrane protein which belongs to the riboflavin transporter family. In humans, riboflavin must be obtained by intestinal absorption because it cannot be synthesized by the body. The water-soluble vitamin riboflavin is processed to the coenzymes flavin mononucleotide (FMN) and flavin adenine dinucleotide (FAD) which then act as intermediaries in many cellular metabolic reactio…	GO:0006771 (riboflavin metabolic process), GO:0032218 (riboflavin transport), GO:0046718 (viral entry into host cell), GO:0005886 (plasma membrane), GO:0005887 (integral component of plasma membrane), GO:0001618 (virus receptor activity), GO:0005515 (protein binding), GO:0032217 (riboflavin transporter activity), R-HSA-1430728 (Homo sapiens: Metabolism), R-HSA-196843 (Homo sapiens: Vitamin B2 (ri…		0.135735	0.160377	0.172542		-0.209823	-0.0900477	-0.168783				267.184	89.4951	34.8292	-0.315709	7.26694	25.996	0.000113031	0.00860075	6.56924e-06	6.68868e-06	0.1	0.310247	0.00496829	-0.87831	-0.977179	0.0213116	0.000775278		168.066	170.996	172.461	131.843	143.429	135.705
ENSG00000279689	AC022400.9	TEC						0.322659	0.379102	0.146884		-0.411868	-0.388121	-0.0486563				266.731	67.1451	94.1807	-0.586642	5.39136	25.9329	0.000114429	0.00861186	1.82573e-06	1.96764e-06	0.1	0.310247	0.0133532	-0.87831	-0.907538	0.0213116	0.0124285		51.4054	53.5362	45.2793	30.0974	30.6301	39.2865
ENSG00000182481	KPNA2	PC	karyopherin subunit alpha 2		The import of proteins into the nucleus is a process that involves at least 2 steps. The first is an energy-independent docking of the protein to the nuclear envelope and the second is an energy-dependent translocation through the nuclear pore complex. Imported proteins require a nuclear localization sequence (NLS) which generally consists of a short region of basic amino acids or 2 such regions …	hsa05164 (Influenza A), GO:0000018 (regulation of DNA recombination), GO:0006259 (DNA metabolic process), GO:0006607 (NLS-bearing protein import into nucleus), GO:0019054 (modulation by virus of host process), GO:0075733 (intracellular transport of virus), GO:0005643 (nuclear pore), GO:0005654 (nucleoplasm), GO:0005737 (cytoplasm), GO:0005829 (cytosol), GO:0016020 (membrane), GO:0003723 (RNA bind…		-0.116989	-0.0999602	-0.184193		0.161139	0.125116	0.114888				266.65	98.0546	26.096	0.267919	9.36207	25.9216	0.00011468	0.00861186	3.72057e-05	3.74697e-05	0.1	0.310247	0.00127789	0.87831	0.978893	0.0213116	0.000663549		603.68	610.872	576.113	732.46	714.348	709.288
ENSG00000163395	IGFN1	PC	immunoglobulin-like and fibronectin type III domain containing 1			GO:0008150 (biological_process), GO:0005634 (nucleus), GO:0030018 (Z disc), GO:0005515 (protein binding)		0.084413	0.263833	0.103847		-0.187046	-0.135199	-0.129848				266.416	95.4262	97.8729	-0.305358	8.30003	25.8891	0.00011541	0.00861186	1.07817e-05	1.09001e-05	0.1	0.310247	0.0352216	-0.87831	-0.916537	0.0213116	0.0101583		331.871	376.085	336.399	274.606	284.727	285.793
ENSG00000105223	PLD3	PC	phospholipase D family member 3		This gene encodes a member of the phospholipase D (PLD) family of enzymes that catalyze the hydrolysis of membrane phospholipids. The encoded protein is a single-pass type II membrane protein and contains two PLD phosphodiesterase domains. This protein influences processing of amyloid-beta precursor protein. Mutations in this gene are associated with Alzheimer disease risk. Alternatively spliced …	hsa00564 (Glycerophospholipid metabolism), hsa00565 (Ether lipid metabolism), hsa01100 (Metabolic pathways), GO:0016042 (lipid catabolic process), GO:0005789 (endoplasmic reticulum membrane), GO:0016021 (integral component of membrane), GO:0070062 (extracellular vesicular exosome), GO:0004630 (phospholipase D activity), GO:0005515 (protein binding), GO:0070290 (N-acylphosphatidylethanolamine-spec…		0.142202	0.307645	0.153842		-0.35155	-0.194075	-0.0580651				266.08	88.0685	19.5158	-0.405489	7.06557	25.8423	0.000116471	0.00863525	3.48544e-06	3.53801e-06	0.1	0.310247	0.0149316	-0.87831	-0.901277	0.0213116	0.0141381		145.959	163.938	147.158	103.077	115.196	126.782
ENSG00000168497	CAVIN2	PC	caveolae associated protein 2		This gene encodes a calcium-independent phospholipid-binding protein whose expression increases in serum-starved cells. This protein is a substrate for protein kinase C (PKC) phosphorylation and recruits polymerase I and transcript release factor (PTRF) to caveolae. Removal of this protein causes caveolae loss and its over-expression results in caveolae deformation and membrane tubulation.[provid…	GO:0005737 (cytoplasm), GO:0005829 (cytosol), GO:0005901 (caveola), GO:0045121 (membrane raft), GO:0001786 (phosphatidylserine binding), GO:0005080 (protein kinase C binding), GO:0005515 (protein binding), GO:0005543 (phospholipid binding)		-0.557349	-0.289909	-0.278855		0.698852	0.338705	0.0885568				265.216	49.5591	91.9671	0.846761	4.35035	25.7221	0.000119242	0.00878441	2.11695e-06	2.37618e-06	0.1	0.310247	0.0702888	0.87831	0.847034	0.0213116	0.0333082		12.3852	15.3151	15.4482	32.3614	24.7705	20.5089
ENSG00000078401	EDN1	PC	endothelin 1		The protein encoded by this gene is proteolytically processed to release a secreted peptide termed endothelin 1. This peptide is a potent vasoconstrictor and is produced by vascular endothelial cells. Endothelin 1 also can affect the central nervous system. Two transcript variants encoding different isoforms have been found for this gene. [provided by RefSeq, Nov 2009].	hsa04066 (HIF-1 signaling pathway), hsa04668 (TNF signaling pathway), hsa04916 (Melanogenesis), hsa04926 (Relaxin signaling pathway), hsa04933 (AGE-RAGE signaling pathway in diabetic complications), hsa05418 (Fluid shear stress and atherosclerosis), GO:0000122 (negative regulation of transcription from RNA polymerase II promoter), GO:0001516 (prostaglandin biosynthetic process), GO:0001569 (patte…		-0.331827	-0.401524	-0.201787		0.253055	0.341042	0.341042				265.164	44.0861	74.0942	0.70049	4.0417	25.4491	0.000125818	0.00899635	4.59133e-06	5.28215e-06	0.0765225	0.310247	0.000672011	0.891133	0.982314	0.017133	0.000466411		12.1189	11.453	13.4506	19.1771	20.5089	20.5089
ENSG00000086061	DNAJA1	PC	DnaJ heat shock protein family (Hsp40) member A1			hsa04141 (Protein processing in endoplasmic reticulum), GO:0006457 (protein folding), GO:0006986 (response to unfolded protein), GO:0007283 (spermatogenesis), GO:0009408 (response to heat), GO:0030317 (sperm motility), GO:0030521 (androgen receptor signaling pathway), GO:0031397 (negative regulation of protein ubiquitination), GO:0032781 (positive regulation of ATPase activity), GO:0042769 (DNA d…		-0.340216	-0.161707	-0.214045		0.38504	0.285507	0.045421				264.938	75.2291	34.2585	0.498092	5.95558	25.6834	0.00012015	0.0087953	2.89892e-06	2.95028e-06	0.1	0.310247	0.0394769	0.87831	0.889647	0.0213116	0.0175949		47.5433	54.0689	52.0713	79.9047	74.4446	62.7252
ENSG00000197858	GPAA1	PC	glycosylphosphatidylinositol anchor attachment 1		Posttranslational glycosylphosphatidylinositol (GPI) anchor attachment serves as a general mechanism for linking proteins to the cell surface membrane. The protein encoded by this gene presumably functions in GPI anchoring at the GPI transfer step. The mRNA transcript is ubiquitously expressed in both fetal and adult tissues. The anchor attachment protein 1 contains an N-terminal signal sequence,…	hsa00563 (Glycosylphosphatidylinositol (GPI)-anchor biosynthesis), hsa01100 (Metabolic pathways), GO:0006461 (protein complex assembly), GO:0006621 (protein retention in ER lumen), GO:0016255 (attachment of GPI anchor to protein), GO:0005789 (endoplasmic reticulum membrane), GO:0016020 (membrane), GO:0042765 (GPI-anchor transamidase complex), GO:0003923 (GPI-anchor transamidase activity), GO:0005…		0.0194746	0.270448	0.218728		-0.195344	-0.113149	-0.200157				263.489	93.3339	22.6719	-0.345536	7.84	25.4823	0.000124997	0.00899635	7.44417e-06	7.53766e-06	0.1	0.310247	0.0454064	-0.87831	-0.890163	0.0213116	0.0174338		229.992	274.073	264.351	197.897	209.617	197.232
ENSG00000112335	SNX3	PC	sorting nexin 3		This gene encodes a member of the sorting nexin family. Members of this family contain a phox (PX) domain, which is a phosphoinositide binding domain, and are involved in intracellular trafficking. This protein does not contain a coiled coil region, like most family members. This protein interacts with phosphatidylinositol-3-phosphate, and is involved in protein trafficking. A pseudogene of this …	hsa04144 (Endocytosis), GO:0009617 (response to bacterium), GO:0010324 (membrane invagination), GO:0010976 (positive regulation of neuron projection development), GO:0015031 (protein transport), GO:0016055 (Wnt signaling pathway), GO:0016579 (protein deubiquitination), GO:0022615 (protein to membrane docking), GO:0030111 (regulation of Wnt signaling pathway), GO:0042177 (negative regulation of pr…		-0.155353	-0.103459	-0.234333		0.192907	0.194164	0.106074				263.373	87.9647	43.1993	0.333304	7.05356	25.4661	0.000125395	0.00899635	6.80656e-06	6.93763e-06	0.1	0.310247	0.00216616	0.87831	0.961893	0.0213116	0.0021505		117.993	122.387	111.6	150.754	150.887	141.831
ENSG00000100749	VRK1	PC	vaccinia related kinase 1		This gene encodes a member of the vaccinia-related kinase (VRK) family of serine/threonine protein kinases. This gene is widely expressed in human tissues and has increased expression in actively dividing cells, such as those in testis, thymus, fetal liver, and carcinomas. Its protein localizes to the nucleus and has been shown to promote the stability and nuclear accumulation of a transcriptiona…	GO:0006468 (protein phosphorylation), GO:0007067 (mitotic nuclear division), GO:0007077 (mitotic nuclear envelope disassembly), GO:0007084 (mitotic nuclear envelope reassembly), GO:0008360 (regulation of cell shape), GO:0043987 (histone H3-S10 phosphorylation), GO:0046777 (protein autophosphorylation), GO:0051301 (cell division), GO:0072355 (histone H3-T3 phosphorylation), GO:0090166 (Golgi disas…		-0.31307	-0.243195	-0.160358		0.437409	0.224567	0.0546472				263.194	76.5174	11.5348	0.499814	6.04704	25.4414	0.000126008	0.00899635	3.16502e-06	3.21926e-06	0.1	0.310247	0.0565813	0.87831	0.87183	0.0213116	0.0235887		51.6717	54.3352	57.6646	88.2947	75.9095	67.2531
ENSG00000154839	SKA1	PC	spindle and kinetochore associated complex subunit 1			GO:0007059 (chromosome segregation), GO:0007062 (sister chromatid cohesion), GO:0007067 (mitotic nuclear division), GO:0031110 (regulation of microtubule polymerization or depolymerization), GO:0051301 (cell division), GO:0000940 (condensed chromosome outer kinetochore), GO:0005829 (cytosol), GO:0005876 (spindle microtubule), GO:0015630 (microtubule cytoskeleton), GO:0005515 (protein binding), GO…		-0.189788	-0.277781	-0.142208		0.273505	0.273505	0.0627669				262.424	79.3187	41.176	0.419621	6.25126	25.0729	0.000135562	0.00945876	4.93639e-06	5.04422e-06	0.0765225	0.310247	0.0216573	0.891133	0.922226	0.017133	0.00883793		65.5219	61.5266	67.7858	91.0914	91.0914	78.4398
ENSG00000132424	PNISR	PC	PNN interacting serine and arginine rich protein			GO:0005829 (cytosol), GO:0016607 (nuclear speck), GO:0003723 (RNA binding)		-0.183144	-0.279483	-0.232437		0.262308	0.385551	0.0472049				261.22	73.8198	73.8608	0.486048	5.85072	25.1681	0.000133016	0.00943841	4.11527e-06	4.1996e-06	0.1	0.310247	0.0489018	0.87831	0.896165	0.0213116	0.0156127		49.5409	46.2116	47.8097	68.1854	74.4446	58.4636
ENSG00000118508	RAB32	PC	RAB32, member RAS oncogene family		Small GTP-binding proteins of the RAB family, such as RAB32, play essential roles in vesicle and granule targeting (Bao et al., 2002 [PubMed 11784320]).[supplied by OMIM, Aug 2009].	GO:0007005 (mitochondrion organization), GO:0016192 (vesicle-mediated transport), GO:0019882 (antigen processing and presentation), GO:0035646 (endosome to melanosome transport), GO:0061024 (membrane organization), GO:0072657 (protein localization to membrane), GO:0090382 (phagosome maturation), GO:1903232 (melanosome assembly), GO:0005739 (mitochondrion), GO:0005741 (mitochondrial outer membrane…		-0.122871	-0.138478	-0.116301		0.137651	0.0832337	0.156765				259.842	97.0258	37.6048	0.253202	8.79695	24.978	0.00013815	0.00945876	2.94571e-05	2.97335e-05	0.1	0.310247	0.00619823	0.87831	0.981454	0.0213116	0.000512714		406.449	402.054	408.313	487.286	469.174	493.811
ENSG00000279232	AC008522.1	antisense						0.138724	0.19943	0.230981		-0.320319	-0.198782	-0.0500339				259.8	85.8205	88.984	-0.382264	6.84349	24.9722	0.000138312	0.00945876	5.32608e-06	5.42315e-06	0.1	0.310247	0.018686	-0.87831	-0.928414	0.0213116	0.00750333		125.051	130.511	133.441	90.4255	98.5492	109.469
ENSG00000104325	DECR1	PC	2,4-dienoyl-CoA reductase 1		This gene encodes an accessory enzyme which participates in the beta-oxidation and metabolism of unsaturated fatty enoyl-CoA esters. [provided by RefSeq, Jul 2008]. Publication Note: This RefSeq record includes a subset of the publications that are available for this gene. Please see the Gene record to access additional publications.	GO:0006635 (fatty acid beta-oxidation), GO:0051289 (protein homotetramerization), GO:0005634 (nucleus), GO:0005654 (nucleoplasm), GO:0005739 (mitochondrion), GO:0005759 (mitochondrial matrix), GO:0005829 (cytosol), GO:0070062 (extracellular vesicular exosome), GO:0008670 (2,4-dienoyl-CoA reductase (NADPH) activity), GO:0016651 (oxidoreductase activity, acting on NAD(P)H), GO:0070402 (NADPH bindin…		-0.246837	-0.210693	-0.143852		0.314533	0.081775	0.205074				259.752	78.8172	11.1543	0.414435	6.20643	24.9656	0.000138495	0.00945876	5.45316e-06	5.57842e-06	0.1	0.310247	0.0246237	0.87831	0.92767	0.0213116	0.00765817		60.9939	62.592	65.6551	90.9582	77.1081	84.1663
ENSG00000203875	SNHG5	processed_transcript	small nucleolar RNA host gene 5		This gene is a member of both the non-protein-coding multiple snoRNA host gene family and the 5_-terminal oligopyrimidine (5_ TOP) class of genes. Two snoRNAs are derived from the introns of this host gene but, although many alternative splice variants have been observed, the gene is thought to have no protein-coding potential. The gene is located at the chromosomal translocation breakpoint invol…			-0.168158	-0.218981	-0.12983		0.236781	0.250338	0.0298497				259.503	89.5815	8.63813	0.352146	7.27833	24.9312	0.000139448	0.00945876	7.62272e-06	7.7453e-06	0.1	0.310247	0.0383151	0.87831	0.905452	0.0213116	0.0129864		136.504	131.71	140.233	181.384	183.115	156.88
ENSG00000169100	SLC25A6	PC	solute carrier family 25 member 6		This gene is a member of the mitochondrial carrier subfamily of solute carrier protein genes. The product of this gene functions as a gated pore that translocates ADP from the cytoplasm into the mitochondrial matrix and ATP from the mitochondrial matrix into the cytoplasm. The protein is implicated in the function of the permability transition pore complex (PTPC), which regulates the release of m…	hsa04020 (Calcium signaling pathway), hsa04022 (cGMP-PKG signaling pathway), hsa04217 (Necroptosis), hsa04218 (Cellular senescence), hsa05012 (Parkinson disease), hsa05016 (Huntington disease), hsa05164 (Influenza A), hsa05166 (Human T-cell leukemia virus 1 infection), GO:0006626 (protein targeting to mitochondrion), GO:0006915 (apoptotic process), GO:0015853 (adenine transport), GO:0015866 (ADP …		0.128677	0.15671	0.116302		-0.211937	-0.0752394	-0.114512				259.463	97.5272	40.8647	-0.267762	9.04559	24.9258	0.000139602	0.00945876	3.27131e-05	3.29802e-05	0.1	0.310247	0.0110537	-0.87831	-0.959971	0.0213116	0.00237138		574.915	586.234	569.987	453.593	498.872	485.421
ENSG00000063245	EPN1	PC	epsin 1		The protein encoded by this gene binds clathrin and is involved in the endocytosis of clathrin-coated vesicles. Three transcript variants encoding different isoforms have been found for this gene. [provided by RefSeq, Nov 2011].	hsa04144 (Endocytosis), GO:0001701 (in utero embryonic development), GO:0006897 (endocytosis), GO:0007219 (Notch signaling pathway), GO:0007565 (female pregnancy), GO:0042059 (negative regulation of epidermal growth factor receptor signaling pathway), GO:0048568 (embryonic organ development), GO:0061024 (membrane organization), GO:0005634 (nucleus), GO:0005829 (cytosol), GO:0005886 (plasma membra…		0.110203	0.298331	0.159999		-0.362053	-0.0922875	-0.114192				259.399	92.5904	92.607	-0.379791	7.69934	24.917	0.000139845	0.00945876	6.51618e-06	6.59868e-06	0.1	0.310247	0.018941	-0.87831	-0.887066	0.0213116	0.0184108		221.736	252.898	229.593	159.277	192.437	189.507
ENSG00000107862	GBF1	PC	golgi brefeldin A resistant guanine nucleotide exchange factor 1		This gene encodes a member of the Sec7 domain family. The encoded protein is a guanine nucleotide exchange factor that regulates the recruitment of proteins to membranes by mediating GDP to GTP exchange. The encoded protein is localized to the Golgi apparatus and plays a role in vesicular trafficking by activating ADP ribosylation factor 1. The encoded protein has also been identified as an impor…	hsa04144 (Endocytosis), GO:0002263 (cell activation involved in immune response), GO:0006888 (ER to Golgi vesicle-mediated transport), GO:0006890 (retrograde vesicle-mediated transport, Golgi to ER), GO:0006892 (post-Golgi vesicle-mediated transport), GO:0006895 (Golgi to endosome transport), GO:0007030 (Golgi organization), GO:0007346 (regulation of mitotic cell cycle), GO:0015031 (protein trans…		0.265509	0.25652	0.191982		-0.49857	-0.104238	-0.111202				259.145	82.0335	93.4112	-0.475565	6.47545	24.882	0.00014083	0.0094653	3.19421e-06	3.24492e-06	0.1	0.310247	0.0403037	-0.87831	-0.906279	0.0213116	0.0127637		105.208	104.542	99.8809	61.1271	80.9701	80.5706
ENSG00000237973	MTCO1P12	unprocessed_pseudogene	mitochondrially encoded cytochrome c oxidase I pseudogene 12					-0.163521	-0.271308	-0.789343		0.228198	0.370477	0.625496				258.917	46.0747	55.8409	0.896581	4.15927	24.8506	0.000141717	0.0094653	2.07469e-06	2.35551e-06	0.1	0.310247	0.0179165	0.87831	0.890447	0.0213116	0.0173454		14.6492	13.4506	8.78952	19.843	22.107	26.7681
ENSG00000134001	EIF2S1	PC	eukaryotic translation initiation factor 2 subunit alpha		The translation initiation factor EIF2 catalyzes the first regulated step of protein synthesis initiation, promoting the binding of the initiator tRNA to 40S ribosomal subunits. Binding occurs as a ternary complex of methionyl-tRNA, EIF2, and GTP. EIF2 is composed of 3 nonidentical subunits, the 36-kD EIF2-alpha subunit (EIF2S1), the 38-kD EIF2-beta subunit (EIF2S2; MIM 603908), and the 52-kD EIF…	hsa03013 (RNA transport), hsa04140 (Autophagy - animal), hsa04141 (Protein processing in endoplasmic reticulum), hsa04210 (Apoptosis), hsa04932 (Non-alcoholic fatty liver disease (NAFLD)), hsa05160 (Hepatitis C), hsa05162 (Measles), hsa05164 (Influenza A), hsa05168 (Herpes simplex infection), GO:0006413 (translational initiation), GO:0007568 (aging), GO:0032057 (negative regulation of translation…		-0.161248	-0.247658	-0.243212		0.292051	0.261091	0.0989757				258.646	70.8802	59.5677	0.454288	5.6479	24.8133	0.000142781	0.0094653	5.93461e-06	6.09663e-06	0.1	0.310247	0.0149936	0.87831	0.949381	0.0213116	0.00377864		43.8144	41.1509	41.2841	60.7276	59.3959	52.8703
ENSG00000230212	AP000688.1	sense_intronic						0.166896	0.433502	0.371326		-0.666472	-0.123072	-0.182181				258.469	65.5801	9.32987	-0.665794	5.29678	24.7889	0.000143481	0.0094653	2.21374e-06	2.38581e-06	0.1	0.310247	0.0196727	-0.87831	-0.891049	0.0213116	0.0171588		42.6159	51.6717	49.4078	23.0392	34.4922	33.0273
ENSG00000143537	ADAM15	PC	ADAM metallopeptidase domain 15		The protein encoded by this gene is a member of the ADAM (a disintegrin and metalloproteinase) protein family. ADAM family members are type I transmembrane glycoproteins known to be involved in cell adhesion and proteolytic ectodomain processing of cytokines and adhesion molecules. This protein contains multiple functional domains including a zinc-binding metalloprotease domain, a disintegrin-lik…	GO:0001525 (angiogenesis), GO:0001953 (negative regulation of cell-matrix adhesion), GO:0006508 (proteolysis), GO:0007160 (cell-matrix adhesion), GO:0007229 (integrin-mediated signaling pathway), GO:0008584 (male gonad development), GO:0022617 (extracellular matrix disassembly), GO:0030308 (negative regulation of cell growth), GO:0030336 (negative regulation of cell migration), GO:0030574 (collag…		0.180771	0.191594	0.303581		-0.429376	-0.0857357	-0.160835				258.245	79.6645	63.208	-0.455928	6.27502	24.7581	0.000144371	0.0094653	3.96416e-06	4.03833e-06	0.1	0.310247	0.0191672	-0.87831	-0.91515	0.0213116	0.0104939		86.4303	87.0962	94.2876	55.9333	71.5147	67.7858
ENSG00000166949	SMAD3	PC	SMAD family member 3		The protein encoded by this gene belongs to the SMAD, a family of proteins similar to the gene products of the Drosophila gene _mothers against decapentaplegic_ (Mad) and the C. elegans gene Sma. SMAD proteins are signal transducers and transcriptional modulators that mediate multiple signaling pathways. This protein functions as a transcriptional modulator activated by transforming growth factor…	hsa04068 (FoxO signaling pathway), hsa04110 (Cell cycle), hsa04144 (Endocytosis), hsa04218 (Cellular senescence), hsa04310 (Wnt signaling pathway), hsa04350 (TGF-beta signaling pathway), hsa04371 (Apelin signaling pathway), hsa04390 (Hippo signaling pathway), hsa04520 (Adherens junction), hsa04550 (Signaling pathways regulating pluripotency of stem cells), hsa04659 (Th17 cell differentiation), hs…		-0.176883	-0.287909	-0.19223		0.329633	0.249542	0.0778472				257.892	73.2059	38.8759	0.456933	5.80564	24.7096	0.000145788	0.0094653	5.67629e-06	5.81513e-06	0.1	0.310247	0.0250248	0.87831	0.9262	0.0213116	0.00796862		48.3424	44.6135	47.8097	69.5171	65.6551	58.0641
ENSG00000039560	RAI14	PC	retinoic acid induced 14			GO:0001650 (fibrillar center), GO:0005634 (nucleus), GO:0005739 (mitochondrion), GO:0005829 (cytosol), GO:0005856 (cytoskeleton), GO:0005938 (cell cortex)		-0.147734	-0.125112	-0.244161		0.232681	0.120123	0.164203				257.799	84.1691	41.1068	0.351298	6.66882	24.6969	0.000146159	0.0094653	8.03382e-06	8.21506e-06	0.1	0.310247	0.00230375	0.87831	0.962049	0.0213116	0.00213307		90.6919	92.1568	84.699	118.659	109.603	113.065
ENSG00000111371	SLC38A1	PC	solute carrier family 38 member 1		Amino acid transporters play essential roles in the uptake of nutrients, production of energy, chemical metabolism, detoxification, and neurotransmitter cycling. SLC38A1 is an important transporter of glutamine, an intermediate in the detoxification of ammonia and the production of urea. Glutamine serves as a precursor for the synaptic transmitter, glutamate (Gu et al., 2001 [PubMed 11325958]).[s…	hsa04724 (Glutamatergic synapse), hsa04727 (GABAergic synapse), GO:0001504 (neurotransmitter uptake), GO:0003333 (amino acid transmembrane transport), GO:0006814 (sodium ion transport), GO:0006865 (amino acid transport), GO:0015804 (neutral amino acid transport), GO:1902475 (L-alpha-amino acid transmembrane transport), GO:0005886 (plasma membrane), GO:0005887 (integral component of plasma membran…		-0.370252	-0.210434	-0.425624		0.63872	0.429275	-0.0616859				257.716	66.6523	79.1526	0.732053	5.36052	24.6855	0.000146496	0.0094653	2.21147e-06	2.37423e-06	0.1	0.310247	0.101116	0.87831	0.809113	0.0213116	0.0511789		29.8311	33.56	28.6325	62.0593	53.403	37.422
ENSG00000124767	GLO1	PC	glyoxalase I		The enzyme encoded by this gene is responsible for the catalysis and formation of S-lactoyl-glutathione from methylglyoxal condensation and reduced glutatione. Glyoxalase I is linked to HLA and is localized to 6p21.3-p21.1, between HLA and the centromere. [provided by RefSeq, Jul 2008]. Publication Note: This RefSeq record includes a subset of the publications that are available for this gene. Pl…	hsa00620 (Pyruvate metabolism), GO:0005975 (carbohydrate metabolic process), GO:0006090 (pyruvate metabolic process), GO:0006357 (regulation of transcription from RNA polymerase II promoter), GO:0006749 (glutathione metabolic process), GO:0009438 (methylglyoxal metabolic process), GO:0030316 (osteoclast differentiation), GO:0043066 (negative regulation of apoptotic process), GO:0005634 (nucleus),…		-0.137077	-0.215632	-0.192994		0.293657	0.0291467	0.222899				257.377	87.273	72.5465	0.373531	6.98444	24.6389	0.000147876	0.0094653	7.31347e-06	7.44198e-06	0.1	0.310247	0.0460854	0.87831	0.897957	0.0213116	0.0150878		113.598	107.472	109.203	153.817	127.714	146.359
ENSG00000077097	TOP2B	PC	DNA topoisomerase II beta		This gene encodes a DNA topoisomerase, an enzyme that controls and alters the topologic states of DNA during transcription. This nuclear enzyme is involved in processes such as chromosome condensation, chromatid separation, and the relief of torsional stress that occurs during DNA transcription and replication. It catalyzes the transient breaking and rejoining of two strands of duplex DNA which a…	hsa01524 (Platinum drug resistance), GO:0000712 (resolution of meiotic recombination intermediates), GO:0000819 (sister chromatid segregation), GO:0001764 (neuron migration), GO:0006265 (DNA topological change), GO:0006312 (mitotic recombination), GO:0007409 (axonogenesis), GO:0016925 (protein sumoylation), GO:0030900 (forebrain development), GO:0044774 (mitotic DNA integrity checkpoint), GO:0000…		-0.1803	-0.223662	-0.207743		0.413041	0.0801376	0.118526				257.316	85.4141	84.7644	0.423011	6.80564	24.6305	0.000148125	0.0094653	5.8115e-06	5.90814e-06	0.1	0.310247	0.0785692	0.87831	0.856223	0.0213116	0.0295217		96.9511	94.0212	95.0866	147.291	116.528	119.724
ENSG00000141030	COPS3	PC	COP9 signalosome subunit 3		The protein encoded by this gene possesses kinase activity that phosphorylates regulators involved in signal transduction. It phosphorylates I kappa-Balpha, p105, and c-Jun. It acts as a docking site for complex-mediated phosphorylation. The gene is located within the Smith-Magenis syndrome region on chromosome 17. Two transcript variants encoding different isoforms have been found for this gene.…	GO:0000338 (protein deneddylation), GO:0000715 (nucleotide-excision repair, DNA damage recognition), GO:0001701 (in utero embryonic development), GO:0006283 (transcription-coupled nucleotide-excision repair), GO:0006511 (ubiquitin-dependent protein catabolic process), GO:0007165 (signal transduction), GO:0009416 (response to light stimulus), GO:0005634 (nucleus), GO:0005654 (nucleoplasm), GO:0005…		-0.0628141	-0.196443	-0.165884		0.175398	0.0828552	0.166887				256.957	95.5127	14.9935	0.284648	8.32541	24.5812	0.000149607	0.00950743	1.96481e-05	1.9869e-05	0.1	0.310247	0.00474515	0.87831	0.944843	0.0213116	0.00447961		305.103	277.935	283.928	360.237	337.731	358.106
ENSG00000113810	SMC4	PC	structural maintenance of chromosomes 4		Members of the structural maintenance of chromosomes, or SMC, family (e.g., SMC1A; MIM 300040) are critical for mitotic chromosome condensation in frogs and for DNA repair in mammals.[supplied by OMIM, Nov 2010].	GO:0000070 (mitotic sister chromatid segregation), GO:0007076 (mitotic chromosome condensation), GO:0010032 (meiotic chromosome condensation), GO:0045132 (meiotic chromosome segregation), GO:0051301 (cell division), GO:0051383 (kinetochore organization), GO:0000796 (condensin complex), GO:0005634 (nucleus), GO:0005654 (nucleoplasm), GO:0005829 (cytosol), GO:0016607 (nuclear speck), GO:0005515 (pr…		-0.226896	-0.0651483	-0.217522		0.210993	0.15291	0.145664				255.944	86.3393	54.7341	0.343794	6.89148	24.4423	0.000153866	0.00972468	8.82312e-06	9.00301e-06	0.1	0.310247	0.00836331	0.87831	0.954569	0.0213116	0.00304911		100.147	112.266	100.813	136.371	130.911	130.245
ENSG00000105255	FSD1	PC	fibronectin type III and SPRY domain containing 1		This gene encodes a centrosome associated protein that is characterized by an N-terminal coiled-coil region downstream of B-box (BBC) domain, a central fibronectin type III domain, and a C-terminal repeats in splA and RyR (SPRY) domain. The encoded protein associates with a subset of microtubules and may be involved in the stability and organization of microtubules during cytokinesis. [provided b…	GO:0007067 (mitotic nuclear division), GO:0051301 (cell division), GO:0005634 (nucleus), GO:0005737 (cytoplasm), GO:0005815 (microtubule organizing center), GO:0005874 (microtubule), GO:0032154 (cleavage furrow)		0.266201	0.230705	0.256148		-0.349087	-0.281631	-0.122336				255.286	59.8911	25.5685	-0.532197	4.93897	24.3522	0.000156704	0.00985023	6.71181e-06	7.36759e-06	0.1	0.310247	0.0101134	-0.87831	-0.973684	0.0213116	0.00102965		36.3567	35.4244	36.0903	23.0392	24.2378	27.3008
ENSG00000063660	GPC1	PC	glypican 1		Cell surface heparan sulfate proteoglycans are composed of a membrane-associated protein core substituted with a variable number of heparan sulfate chains. Members of the glypican-related integral membrane proteoglycan family (GRIPS) contain a core protein anchored to the cytoplasmic membrane via a glycosyl phosphatidylinositol linkage. These proteins may play a role in the control of cell divisi…	hsa05205 (Proteoglycans in cancer), hsa05418 (Fluid shear stress and atherosclerosis), GO:0001523 (retinoid metabolic process), GO:0006024 (glycosaminoglycan biosynthetic process), GO:0006027 (glycosaminoglycan catabolic process), GO:0007411 (axon guidance), GO:0014037 (Schwann cell differentiation), GO:0030200 (heparan sulfate proteoglycan catabolic process), GO:0030203 (glycosaminoglycan metabo…		0.229857	0.251095	0.170584		-0.353551	-0.13707	-0.160916				255.052	71.9869	65.214	-0.448183	5.71527	24.3202	0.000157726	0.00986084	6.22012e-06	6.38816e-06	0.1	0.310247	0.00745231	-0.87831	-0.95904	0.0213116	0.00248226		60.8608	61.793	58.3305	39.9524	46.7443	45.9452
ENSG00000143507	DUSP10	PC	dual specificity phosphatase 10		Dual specificity protein phosphatases inactivate their target kinases by dephosphorylating both the phosphoserine/threonine and phosphotyrosine residues. They negatively regulate members of the MAP kinase superfamily, which is associated with cellular proliferation and differentiation. Different members of this family of dual specificity phosphatases show distinct substrate specificities for MAP …	hsa04010 (MAPK signaling pathway), GO:0000188 (inactivation of MAPK activity), GO:0002819 (regulation of adaptive immune response), GO:0006470 (protein dephosphorylation), GO:0006950 (response to stress), GO:0007254 (JNK cascade), GO:0016311 (dephosphorylation), GO:0032496 (response to lipopolysaccharide), GO:0035335 (peptidyl-tyrosine dephosphorylation), GO:0043508 (negative regulation of JUN ki…		-0.389965	-0.0915549	-0.482466		0.458956	0.418601	0.0864283				254.438	56.692	55.0281	0.691139	4.76852	24.2362	0.000160444	0.00997687	4.17024e-06	4.58059e-06	0.1	0.310247	0.0242092	0.87831	0.883794	0.0213116	0.019471		19.4435	24.3709	18.1117	36.623	35.5576	27.8335
ENSG00000169251	NMD3	PC	NMD3 ribosome export adaptor		Ribosomes are composed of 60S and 40S subunits that are assembled in the nucleolus and exported to the cytoplasm through nuclear pore complexes in the nuclear envelope. NMD3 is an adaptor for 60S subunit export via the CRM1 (XPO1; MIM 602559) pathway (Trotta et al., 2003 [PubMed 12773398]).[supplied by OMIM, Mar 2008].	hsa03008 (Ribosome biogenesis in eukaryotes), hsa03013 (RNA transport), GO:0000055 (ribosomal large subunit export from nucleus), GO:1902680 (positive regulation of RNA biosynthetic process), GO:1904751 (NA), GO:0005634 (nucleus), GO:0005654 (nucleoplasm), GO:0005730 (nucleolus), GO:0005737 (cytoplasm), GO:0016020 (membrane), GO:0003723 (RNA binding), GO:0005515 (protein binding), GO:0030674 (pro…		-0.660246	-0.269869	-0.255074		0.676985	0.37805	0.130154				253.873	40.6969	44.4531	0.912613	3.86837	24.1589	0.00016299	0.0100809	4.11531e-06	4.73591e-06	0.1	0.310247	0.0438161	0.87831	0.868454	0.0213116	0.0248182		7.8573	10.9203	11.0535	22.906	18.2449	15.0487
ENSG00000128989	ARPP19	PC	cAMP regulated phosphoprotein 19		The 19-kD cAMP-regulated phosphoprotein plays a role in regulating mitosis by inhibiting protein phosphatase-2A (PP2A; see MIM 176915) (summary by Gharbi-Ayachi et al., 2010 [PubMed 21164014]).[supplied by OMIM, Feb 2011].	GO:0000086 (G2/M transition of mitotic cell cycle), GO:0007067 (mitotic nuclear division), GO:0035308 (negative regulation of protein dephosphorylation), GO:0043086 (negative regulation of catalytic activity), GO:0045722 (positive regulation of gluconeogenesis), GO:0046326 (positive regulation of glucose import), GO:0051301 (cell division), GO:0005654 (nucleoplasm), GO:0005737 (cytoplasm), GO:000…		-0.0801763	-0.299331	-0.35096		0.300548	0.278065	0.151853				253.29	66.5744	59.1353	0.507666	5.35427	24.0794	0.00016566	0.0101916	6.11884e-06	6.59738e-06	0.1	0.310247	0.00698761	0.87831	0.937988	0.0213116	0.00564903		37.6884	32.0951	30.8965	49.6741	48.8751	44.6135
ENSG00000041357	PSMA4	PC	proteasome subunit alpha 4		The proteasome is a multicatalytic proteinase complex with a highly ordered ring-shaped 20S core structure. The core structure is composed of 4 rings of 28 non-identical subunits; 2 rings are composed of 7 alpha subunits and 2 rings are composed of 7 beta subunits. Proteasomes are distributed throughout eukaryotic cells at a high concentration and cleave peptides in an ATP/ubiquitin-dependent pro…	hsa03050 (Proteasome), GO:0000165 (MAPK cascade), GO:0000209 (protein polyubiquitination), GO:0002223 (stimulatory C-type lectin receptor signaling pathway), GO:0002479 (antigen processing and presentation of exogenous peptide antigen via MHC class I, TAP-dependent), GO:0006521 (regulation of cellular amino acid metabolic process), GO:0010972 (negative regulation of G2/M transition of mitotic cel…		-0.215976	-0.139031	-0.101466		0.165423	0.210925	0.0801261				252.866	91.1119	30.2551	0.307984	7.46968	24.0216	0.000167629	0.0102148	1.50473e-05	1.52969e-05	0.1	0.310247	0.00573338	0.87831	0.946643	0.0213116	0.00419447		151.153	159.543	163.805	197.498	203.89	186.045
ENSG00000130429	ARPC1B	PC	actin related protein 2/3 complex subunit 1B		This gene encodes one of seven subunits of the human Arp2/3 protein complex. This subunit is a member of the SOP2 family of proteins and is most similar to the protein encoded by gene ARPC1A. The similarity between these two proteins suggests that they both may function as p41 subunit of the human Arp2/3 complex that has been implicated in the control of actin polymerization in cells. It is possi…	hsa04144 (Endocytosis), hsa04666 (Fc gamma R-mediated phagocytosis), hsa04810 (Regulation of actin cytoskeleton), hsa05100 (Bacterial invasion of epithelial cells), hsa05130 (Pathogenic Escherichia coli infection), hsa05131 (Shigellosis), hsa05132 (Salmonella infection), GO:0006928 (cellular component movement), GO:0032355 (response to estradiol), GO:0034314 (Arp2/3 complex-mediated actin nucleat…		-0.300758	-0.485576	-0.395075		0.862976	0.308294	0.010139				252.829	55.2481	11.3965	0.898549	4.68385	24.0166	0.000167803	0.0102148	2.89212e-06	3.18332e-06	0.1	0.310247	0.131728	0.87831	0.773069	0.0213116	0.0714033		19.044	16.5136	17.7122	45.1462	30.0974	24.1046
ENSG00000169994	MYO7B	PC	myosin VIIB			GO:0030154 (cell differentiation), GO:1904970 (NA), GO:0005902 (microvillus), GO:0005903 (brush border), GO:0016459 (myosin complex), GO:0070062 (extracellular vesicular exosome), GO:0090651 (NA), GO:0003774 (motor activity), GO:0003779 (actin binding), GO:0005515 (protein binding), GO:0005524 (ATP binding)		0.242255	0.366576	0.242255		-0.527072	-0.238337	-0.0856754				252.245	61.3695	94.1894	-0.592031	5.03683	23.6893	0.000179488	0.0102408	5.0559e-06	5.50477e-06	0.0765225	0.310247	0.0180348	-0.891133	-0.924265	0.017133	0.0083864		37.9547	41.5505	37.9547	21.4411	26.6349	29.8311
ENSG00000100526	CDKN3	PC	cyclin dependent kinase inhibitor 3		The protein encoded by this gene belongs to the dual specificity protein phosphatase family. It was identified as a cyclin-dependent kinase inhibitor, and has been shown to interact with, and dephosphorylate CDK2 kinase, thus prevent the activation of CDK2 kinase. This gene was reported to be deleted, mutated, or overexpressed in several kinds of cancers. Alternatively spliced transcript variants…	GO:0000079 (regulation of cyclin-dependent protein serine/threonine kinase activity), GO:0000082 (G1/S transition of mitotic cell cycle), GO:0007050 (cell cycle arrest), GO:0008285 (negative regulation of cell proliferation), GO:0035335 (peptidyl-tyrosine dephosphorylation), GO:0005634 (nucleus), GO:0005829 (cytosol), GO:0048471 (perinuclear region of cytoplasm), GO:0004722 (protein serine/threon…		-0.174501	-0.129937	-0.16323		0.124227	0.166528	0.176913				252.16	85.6908	10.1859	0.317318	6.83201	23.9254	0.000170969	0.0102408	1.3728e-05	1.40489e-05	0.1	0.310247	0.000295771	0.87831	0.99062	0.0213116	0.000131551		99.8809	103.077	100.68	123.32	127.049	127.981
ENSG00000117133	RPF1	PC	ribosome production factor 1 homolog			GO:0000027 (ribosomal large subunit assembly), GO:0000460 (maturation of 5.8S rRNA), GO:0000470 (maturation of LSU-rRNA), GO:0005730 (nucleolus), GO:0030687 (preribosome, large subunit precursor), GO:0003723 (RNA binding), GO:0005515 (protein binding), GO:0042134 (rRNA primary transcript binding)		-0.15785	-0.31693	-0.141211		0.26801	0.237796	0.110186				252.034	75.5836	26.9607	0.423259	5.9781	23.9082	0.000171573	0.0102408	7.78367e-06	7.98484e-06	0.1	0.310247	0.00509714	0.87831	0.942863	0.0213116	0.00480363		55.4006	49.4078	56.0665	75.1104	73.5124	67.12
ENSG00000177697	CD151	PC	CD151 molecule (Raph blood group)		The protein encoded by this gene is a member of the transmembrane 4 superfamily, also known as the tetraspanin family. Most of these members are cell-surface proteins that are characterized by the presence of four hydrophobic domains. The proteins mediate signal transduction events that play a role in the regulation of cell development, activation, growth and motility. This encoded protein is a c…	GO:0007155 (cell adhesion), GO:0007166 (cell surface receptor signaling pathway), GO:0016477 (cell migration), GO:0031581 (hemidesmosome assembly), GO:0042098 (T cell proliferation), GO:0005604 (basement membrane), GO:0005829 (cytosol), GO:0005886 (plasma membrane), GO:0005887 (integral component of plasma membrane), GO:0005925 (focal adhesion), GO:0016020 (membrane), GO:0005178 (integrin binding…		0.135242	0.186027	0.100486		-0.231631	-0.0431592	-0.146965				251.888	97.3284	18.0891	-0.280663	8.9517	23.8883	0.000172277	0.0102408	3.54179e-05	3.57164e-05	0.1	0.310247	0.0145161	-0.87831	-0.926889	0.0213116	0.00782246		540.689	560.132	527.771	418.834	477.564	444.27
ENSG00000143774	GUK1	PC	guanylate kinase 1		The protein encoded by this gene is an enzyme that catalyzes the transfer of a phosphate group from ATP to guanosine monophosphate (GMP) to form guanosine diphosphate (GDP). The encoded protein is thought to be a good target for cancer chemotherapy. Several transcript variants encoding different isoforms have been found for this gene. [provided by RefSeq, Jun 2011].	hsa00230 (Purine metabolism), hsa01100 (Metabolic pathways), GO:0006163 (purine nucleotide metabolic process), GO:0006185 (dGDP biosynthetic process), GO:0015949 (nucleobase-containing small molecule interconversion), GO:0019673 (GDP-mannose metabolic process), GO:0034436 (glycoprotein transport), GO:0046034 (ATP metabolic process), GO:0046037 (GMP metabolic process), GO:0046054 (dGMP metabolic p…		0.118484	0.165238	0.122192		-0.181702	-0.117333	-0.106879				251.375	93.5933	12.5292	-0.27266	7.8931	23.8185	0.000174767	0.0102408	2.3075e-05	2.34104e-05	0.1	0.310247	0.00071759	-0.87831	-0.980892	0.0213116	0.000544188		256.761	265.284	257.426	208.152	217.74	219.338
ENSG00000128641	MYO1B	PC	myosin IB			GO:0006892 (post-Golgi vesicle-mediated transport), GO:0007015 (actin filament organization), GO:0030048 (actin filament-based movement), GO:0051017 (actin filament bundle assembly), GO:0005737 (cytoplasm), GO:0005769 (early endosome), GO:0005884 (actin filament), GO:0005886 (plasma membrane), GO:0005903 (brush border), GO:0010008 (endosome membrane), GO:0016459 (myosin complex), GO:0030175 (filo…		-0.309498	-0.278204	-0.328605		0.658457	0.110249	0.1476				251.368	64.2832	72.9356	0.668445	5.21379	23.8177	0.000174799	0.0102408	4.8345e-06	5.2049e-06	0.1	0.310247	0.109945	0.87831	0.808942	0.0213116	0.0512678		28.3662	29.0321	27.9667	57.3982	38.6206	39.686
ENSG00000117525	F3	PC	coagulation factor III, tissue factor		This gene encodes coagulation factor III which is a cell surface glycoprotein. This factor enables cells to initiate the blood coagulation cascades, and it functions as the high-affinity receptor for the coagulation factor VII. The resulting complex provides a catalytic event that is responsible for initiation of the coagulation protease cascades by specific limited proteolysis. Unlike the other …	hsa04610 (Complement and coagulation cascades), hsa04933 (AGE-RAGE signaling pathway in diabetic complications), GO:0001938 (positive regulation of endothelial cell proliferation), GO:0002541 (activation of plasma proteins involved in acute inflammatory response), GO:0002543 (activation of blood coagulation via clotting cascade), GO:0006919 (activation of cysteine-type endopeptidase activity invo…		-0.0593234	-0.22444	-0.258927		0.238076	0.147933	0.156682				250.627	83.6244	51.3705	0.367087	6.61397	23.7169	0.000178468	0.0102408	9.87068e-06	1.00887e-05	0.1	0.310247	0.00902179	0.87831	0.941823	0.0213116	0.00497832		92.8227	82.5682	80.5706	114.53	107.472	108.138
ENSG00000136630	HLX	PC	H2.0 like homeobox			GO:0001889 (liver development), GO:0006351 (transcription, DNA-templated), GO:0006355 (regulation of transcription, DNA-templated), GO:0007275 (multicellular organismal development), GO:0007519 (skeletal muscle tissue development), GO:0008284 (positive regulation of cell proliferation), GO:0030154 (cell differentiation), GO:0045627 (positive regulation of T-helper 1 cell differentiation), GO:0045…		0.323283	0.206847	0.155775		-0.246298	-0.146769	-0.292837				250.618	65.217	88.5603	-0.48178	5.2713	23.7156	0.000178514	0.0102408	9.57201e-06	1.0357e-05	0.1	0.310247	0.00480158	-0.87831	-0.957298	0.0213116	0.00269621		47.8097	43.9476	42.3495	31.5624	33.9595	30.497
ENSG00000077152	UBE2T	PC	ubiquitin conjugating enzyme E2 T		The covalent conjugation of ubiquitin to proteins regulates diverse cellular pathways and proteins. Ubiquitin is transferred to a target protein through a concerted action of a ubiquitin-activating enzyme (E1), a ubiquitin-conjugating enzyme (E2), such as UBE2T, and a ubiquitin ligase (E3) (Machida et al., 2006 [PubMed 16916645]).[supplied by OMIM, Mar 2008].	hsa03460 (Fanconi anemia pathway), GO:0006281 (DNA repair), GO:0006513 (protein monoubiquitination), GO:0006974 (cellular response to DNA damage stimulus), GO:0016567 (protein ubiquitination), GO:0035519 (protein K29-linked ubiquitination), GO:0036297 (interstrand cross-link repair), GO:0044314 (protein K27-linked ubiquitination), GO:0051865 (protein autoubiquitination), GO:0070534 (protein K63-l…		-0.14801	-0.184001	-0.151692		0.296744	0.103329	0.08363				250.314	90.8439	13.4717	0.329395	7.43679	23.6743	0.000180044	0.0102408	1.49261e-05	1.51629e-05	0.1	0.310247	0.0501896	0.87831	0.901284	0.0213116	0.0141364		154.749	150.887	154.349	211.348	184.58	182.05
ENSG00000136280	CCM2	PC	CCM2 scaffold protein		This gene encodes a scaffold protein that functions in the stress-activated p38 Mitogen-activated protein kinase (MAPK) signaling cascade. The protein interacts with SMAD specific E3 ubiquitin protein ligase 1 (also known as SMURF1) via a phosphotyrosine binding domain to promote RhoA degradation. The protein is required for normal cytoskeletal structure, cell-cell interactions, and lumen formati…	GO:0001570 (vasculogenesis), GO:0001701 (in utero embryonic development), GO:0001885 (endothelial cell development), GO:0007229 (integrin-mediated signaling pathway), GO:0035264 (multicellular organism growth), GO:0045216 (cell-cell junction organization), GO:0048839 (inner ear development), GO:0048845 (venous blood vessel morphogenesis), GO:0051403 (stress-activated MAPK cascade), GO:0060039 (pe…		0.112285	0.167697	0.254912		-0.223825	-0.151611	-0.159458				250.226	80.3822	57.1293	-0.366334	6.33536	23.6624	0.000180486	0.0102408	1.13824e-05	1.16804e-05	0.1	0.310247	0.00842944	-0.87831	-0.961362	0.0213116	0.00221049		86.4303	89.8928	95.6193	68.0522	71.6479	71.2484
ENSG00000284121	MIR198	miRNA	microRNA 198					-0.303098	-0.201956	-0.232329		0.224291	0.479842	0.0332499				250.201	74.0273	0.0691742	0.520191	5.86398	23.659	0.000180615	0.0102408	6.16549e-06	6.28322e-06	0.1	0.310247	0.0792632	0.87831	0.849003	0.0213116	0.0324786		45.6789	49.1414	48.076	66.7205	80.0379	58.1973
ENSG00000115286	NDUFS7	PC	NADH:ubiquinone oxidoreductase core subunit S7		This gene encodes a protein that is a subunit of one of the complexes that forms the mitochondrial respiratory chain. This protein is one of over 40 subunits found in complex I, the nicotinamide adenine dinucleotide (NADH):ubiquinone oxidoreductase. This complex functions in the transfer of electrons from NADH to the respiratory chain, and ubiquinone is believed to be the immediate electron accep…	hsa00190 (Oxidative phosphorylation), hsa01100 (Metabolic pathways), hsa04714 (Thermogenesis), hsa04723 (Retrograde endocannabinoid signaling), hsa04932 (Non-alcoholic fatty liver disease (NAFLD)), hsa05010 (Alzheimer disease), hsa05012 (Parkinson disease), hsa05016 (Huntington disease), GO:0006120 (mitochondrial electron transport, NADH to ubiquinone), GO:0032981 (mitochondrial respiratory chain…		0.0556263	0.298998	0.26563		-0.3336	-0.19757	-0.0890842				250.123	82.12	59.7319	-0.423345	6.48192	23.6484	0.00018101	0.0102408	7.82355e-06	7.97745e-06	0.1	0.310247	0.0204356	-0.87831	-0.89224	0.0213116	0.0167926		91.4909	108.67	106.14	69.3839	76.4422	82.5682
ENSG00000185222	TCEAL9	PC	transcription elongation factor A like 9		The globular WW domain is composed of 38 to 40 semiconserved amino acids shared by proteins of diverse functions including structural, regulatory, and signaling proteins. The domain is involved in mediating protein-protein interactions through the binding of polyproline ligands. This gene encodes a WW domain binding protein. This gene also encodes a domain with similarity to the transcription elo…	GO:0006351 (transcription, DNA-templated), GO:0006355 (regulation of transcription, DNA-templated), GO:0005634 (nucleus), GO:0050699 (WW domain binding)		-0.111145	-0.303087	-0.298191		0.54949	0.0718056	0.0911276				250.11	95.9191	25.5426	0.492467	8.42576	23.6467	0.000181074	0.0102408	6.65442e-06	6.73246e-06	0.1	0.310247	0.117324	0.87831	0.774018	0.0213116	0.0708318		311.229	272.209	273.141	493.145	353.578	358.373
ENSG00000114735	HEMK1	PC	HemK methyltransferase family member 1			GO:0006306 (DNA methylation), GO:0006479 (protein methylation), GO:0005739 (mitochondrion), GO:0003677 (DNA binding), GO:0005515 (protein binding), GO:0008170 (N-methyltransferase activity), GO:0008276 (protein methyltransferase activity), GO:0008757 (S-adenosylmethionine-dependent methyltransferase activity)		0.277582	0.312913	0.197929		-0.374433	-0.240355	-0.173636				250.077	54.9369	98.2015	-0.566496	4.66251	23.6422	0.000181242	0.0102408	9.42013e-06	1.04444e-05	0.1	0.310247	0.00130892	-0.87831	-0.972335	0.0213116	0.00113743		30.2306	31.0297	28.4994	18.5113	20.5089	21.5743
ENSG00000170759	KIF5B	PC	kinesin family member 5B			hsa04144 (Endocytosis), hsa04728 (Dopaminergic synapse), GO:0007018 (microtubule-based movement), GO:0007028 (cytoplasm organization), GO:0007411 (axon guidance), GO:0030705 (cytoskeleton-dependent intracellular transport), GO:0031340 (positive regulation of vesicle fusion), GO:0032230 (positive regulation of synaptic transmission, GABAergic), GO:0035617 (stress granule disassembly), GO:0035774 (…		-0.450714	-0.314413	-0.222796		0.536115	0.384125	0.0676831				250.024	47.9595	91.5867	0.741716	4.25797	23.6351	0.000181512	0.0102408	7.40705e-06	8.31905e-06	0.1	0.310247	0.0469545	0.87831	0.885994	0.0213116	0.0187553		12.7848	14.2497	15.3151	27.3008	24.3709	19.1771
ENSG00000058262	SEC61A1	PC	Sec61 translocon alpha 1 subunit		The protein encoded by this gene belongs to the SECY/SEC61- alpha family. It appears to play a crucial role in the insertion of secretory and membrane polypeptides into the endoplasmic reticulum. This protein found to be tightly associated with membrane-bound ribosomes, either directly or through adaptor proteins. This gene encodes an alpha subunit of the heteromeric SEC61 complex, which also con…	hsa03060 (Protein export), hsa04141 (Protein processing in endoplasmic reticulum), hsa04145 (Phagosome), hsa05110 (Vibrio cholerae infection), GO:0006614 (SRP-dependent cotranslational protein targeting to membrane), GO:0006620 (posttranslational protein targeting to membrane), GO:0007029 (endoplasmic reticulum organization), GO:0016049 (cell growth), GO:0034341 (response to interferon-gamma), GO…		0.151676	0.192065	0.127969		-0.235809	-0.0256614	-0.21024				249.231	93.2734	70.8344	-0.314374	7.83215	23.5274	0.000185604	0.0104209	1.78988e-05	1.81401e-05	0.1	0.310247	0.0256514	-0.87831	-0.924966	0.0213116	0.00823395		251.3	258.492	247.172	191.638	222.002	195.101
ENSG00000114270	COL7A1	PC	collagen type VII alpha 1 chain		This gene encodes the alpha chain of type VII collagen. The type VII collagen fibril, composed of three identical alpha collagen chains, is restricted to the basement zone beneath stratified squamous epithelia. It functions as an anchoring fibril between the external epithelia and the underlying stroma. Mutations in this gene are associated with all forms of dystrophic epidermolysis bullosa. In t…	hsa04974 (Protein digestion and absorption), GO:0006888 (ER to Golgi vesicle-mediated transport), GO:0007155 (cell adhesion), GO:0008544 (epidermis development), GO:0010951 (negative regulation of endopeptidase activity), GO:0030198 (extracellular matrix organization), GO:0030574 (collagen catabolic process), GO:0035987 (endodermal cell differentiation), GO:0048208 (COPII vesicle coating), GO:000…		0.109694	0.130603	0.208386		-0.218826	-0.10447	-0.125387				248.951	90.5672	73.8867	-0.302452	7.39536	23.4895	0.00018707	0.0104407	1.86548e-05	1.89825e-05	0.1	0.310247	0.00290777	-0.87831	-0.956005	0.0213116	0.00286074		180.452	183.115	193.369	143.296	155.282	153.018
ENSG00000138757	G3BP2	PC	G3BP stress granule assembly factor 2			GO:0007253 (cytoplasmic sequestering of NF-kappaB), GO:0007265 (Ras protein signal transduction), GO:0034063 (stress granule assembly), GO:0051028 (mRNA transport), GO:0005737 (cytoplasm), GO:0005829 (cytosol), GO:0030529 (ribonucleoprotein complex), GO:0003723 (RNA binding), GO:0003729 (mRNA binding), GO:0005515 (protein binding), GO:0030159 (receptor signaling complex scaffold activity)		-0.660714	-0.234159	-0.556036		0.954759	0.651711	-0.15556				248.813	48.6166	30.5318	1.14217	4.30084	23.4708	0.000187798	0.0104407	2.50297e-06	2.82082e-06	0.1	0.310247	0.127682	0.87831	0.768173	0.0213116	0.0743858		10.3876	14.6492	11.3198	35.9571	28.7657	15.5814
ENSG00000167615	LENG8	PC	leukocyte receptor cluster member 8			GO:0005515 (protein binding)		0.230802	0.212655	0.19633		-0.421827	-0.134337	-0.0836231				248.65	80.4686	80.2853	-0.429524	6.3409	23.4487	0.000188666	0.0104407	7.30806e-06	7.4593e-06	0.1	0.310247	0.0389409	-0.87831	-0.921584	0.0213116	0.00898246		93.8881	92.6895	91.6241	58.9963	72.447	75.1104
ENSG00000118762	PKD2	PC	polycystin 2, transient receptor potential cation channel		This gene encodes a member of the polycystin protein family. The encoded protein is a multi-pass membrane protein that functions as a calcium permeable cation channel, and is involved in calcium transport and calcium signaling in renal epithelial cells. This protein interacts with polycystin 1, and they may be partners in a common signaling cascade involved in tubular morphogenesis. Mutations in …	GO:0001658 (branching involved in ureteric bud morphogenesis), GO:0001889 (liver development), GO:0001892 (embryonic placenta development), GO:0001947 (heart looping), GO:0003127 (detection of nodal flow), GO:0006816 (calcium ion transport), GO:0007050 (cell cycle arrest), GO:0007259 (JAK-STAT cascade), GO:0007368 (determination of left/right symmetry), GO:0007507 (heart development), GO:0008285 …		-0.340123	-0.154587	-0.321388		0.228983	0.396775	0.19034				248.329	54.1501	64.1937	0.590039	4.61887	23.4053	0.000190377	0.0104432	1.00409e-05	1.11303e-05	0.1	0.310247	0.00669319	0.87831	0.947486	0.0213116	0.00406415		18.3781	21.1748	18.6444	28.233	31.9619	27.434
ENSG00000136522	MRPL47	PC	mitochondrial ribosomal protein L47		Mammalian mitochondrial ribosomal proteins are encoded by nuclear genes and help in protein synthesis within the mitochondrion. Mitochondrial ribosomes (mitoribosomes) consist of a small 28S subunit and a large 39S subunit. They have an estimated 75% protein to rRNA composition compared to prokaryotic ribosomes, where this ratio is reversed. Another difference between mammalian mitoribosomes and …	GO:0008150 (biological_process), GO:0032543 (mitochondrial translation), GO:0070125 (mitochondrial translational elongation), GO:0070126 (mitochondrial translational termination), GO:0005575 (cellular_component), GO:0005739 (mitochondrion), GO:0005743 (mitochondrial inner membrane), GO:0005762 (mitochondrial large ribosomal subunit), GO:0003674 (molecular_function), GO:0003735 (structural constit…		-0.125906	-0.304498	-0.183872		0.347815	0.21369	0.0527705				248.291	81.1344	27.0644	0.422521	6.39593	23.4001	0.000190582	0.0104432	9.2038e-06	9.39476e-06	0.1	0.310247	0.0347815	0.87831	0.887106	0.0213116	0.0183982		75.7763	66.7205	72.7133	106.007	96.4184	86.0308
ENSG00000178605	GTPBP6	PC	GTP binding protein 6 (putative)		This gene encodes a GTP binding protein and is located in the pseudoautosomal region (PAR) at the end of the short arms of the X and Y chromosomes. [provided by RefSeq, Nov 2011].	GO:0005737 (cytoplasm), GO:0005525 (GTP binding), GO:0043022 (ribosome binding), GO:0046872 (metal ion binding)		0.119095	0.229392	0.243964		-0.2429	-0.307837	-0.0417141				248.135	81.999	72.1228	-0.400411	6.47221	23.3791	0.000191419	0.0104432	9.23035e-06	9.42765e-06	0.1	0.310247	0.0143999	-0.87831	-0.919265	0.0213116	0.00951416		95.2198	102.944	104.009	73.6455	70.3162	84.9654
ENSG00000151806	GUF1	PC	GUF1 homolog, GTPase			GO:0006412 (translation), GO:0005743 (mitochondrial inner membrane), GO:0003924 (GTPase activity), GO:0005525 (GTP binding)		-0.218737	-0.182213	-0.24003		0.265908	0.235375	0.139697				247.824	66.6436	89.7622	0.449252	5.35974	23.3369	0.000193107	0.0104469	1.26763e-05	1.36816e-05	0.1	0.310247	0.0057235	0.87831	0.977823	0.0213116	0.00073226		34.359	35.2913	33.8263	48.8751	47.8097	44.6135
ENSG00000107164	FUBP3	PC	far upstream element binding protein 3			GO:0006351 (transcription, DNA-templated), GO:0006366 (transcription from RNA polymerase II promoter), GO:0010628 (positive regulation of gene expression), GO:0045893 (positive regulation of transcription, DNA-templated), GO:0045944 (positive regulation of transcription from RNA polymerase II promoter), GO:0005634 (nucleus), GO:0005737 (cytoplasm), GO:0016020 (membrane), GO:0000978 (RNA polymeras…		-0.397001	-0.285651	-0.397001		0.722495	0.442988	-0.08583				247.814	57.4875	40.882	0.813183	4.81021	23.094	0.000203178	0.0105541	4.92972e-06	5.38213e-06	0.0765225	0.310247	0.118888	0.891133	0.793073	0.017133	0.0597979		19.5767	21.3079	19.5767	44.8798	36.623	24.7705
ENSG00000107140	TESK1	PC	testis associated actin remodelling kinase 1		This gene product is a serine/threonine protein kinase that contains an N-terminal protein kinase domain and a C-terminal proline-rich domain. Its protein kinase domain is most closely related to those of the LIM motif-containing protein kinases (LIMKs). The encoded protein can phosphorylate myelin basic protein and histone in vitro. The testicular germ cell-specific expression and developmental …	GO:0006468 (protein phosphorylation), GO:0007283 (spermatogenesis), GO:0018108 (peptidyl-tyrosine phosphorylation), GO:0035556 (intracellular signal transduction), GO:0005737 (cytoplasm), GO:0005829 (cytosol), GO:0004674 (protein serine/threonine kinase activity), GO:0004712 (protein serine/threonine/tyrosine kinase activity), GO:0004713 (protein tyrosine kinase activity), GO:0004871 (signal tran…		0.0497912	0.396752	0.265512		-0.336702	-0.123038	-0.252315				247.79	72.9812	52.6329	-0.4967	5.78313	23.3323	0.000193295	0.0104469	7.64174e-06	7.80886e-06	0.1	0.310247	0.0380699	-0.87831	-0.881508	0.0213116	0.0202288		55.8001	71.5147	65.1224	42.2163	49.2746	44.8798
ENSG00000130204	TOMM40	PC	translocase of outer mitochondrial membrane 40		TOMM40 is the channel-forming subunit of the translocase of the mitochondrial outer membrane (TOM) complex that is essential for protein import into mitochondria (Humphries et al., 2005 [PubMed 15644312]).[supplied by OMIM, May 2008].	hsa05014 (Amyotrophic lateral sclerosis (ALS)), GO:0006626 (protein targeting to mitochondrion), GO:0006811 (ion transport), GO:0016236 (macroautophagy), GO:0030150 (protein import into mitochondrial matrix), GO:0005739 (mitochondrion), GO:0005741 (mitochondrial outer membrane), GO:0005742 (mitochondrial outer membrane translocase complex), GO:0005743 (mitochondrial inner membrane), GO:0005829 (c…		0.100552	0.161311	0.116791		-0.174663	-0.098237	-0.105754				247.433	96.36	51.3446	-0.253568	8.58449	23.2841	0.000195247	0.0105034	4.46481e-05	4.51095e-05	0.1	0.310247	0.00110569	-0.87831	-0.973367	0.0213116	0.00105451		409.778	427.49	414.439	338.263	356.775	354.91
ENSG00000056050	HPF1	PC	histone PARylation factor 1			GO:0006974 (cellular response to DNA damage stimulus), GO:0010835 (regulation of protein ADP-ribosylation), GO:0018312 (peptidyl-serine ADP-ribosylation), GO:0005634 (nucleus), GO:0005515 (protein binding), GO:0042393 (histone binding)		-0.22329	-0.284977	-0.257235		0.437864	0.233056	0.0945825				247.139	60.9459	11.4224	0.549784	5.01422	23.2443	0.000196877	0.0105366	1.05581e-05	1.14874e-05	0.1	0.310247	0.0477493	0.87831	0.906143	0.0213116	0.0128002		26.6349	25.4363	25.969	43.2817	37.2889	33.6932
ENSG00000150938	CRIM1	PC	cysteine rich transmembrane BMP regulator 1		This gene encodes a transmembrane protein containing six cysteine-rich repeat domains and an insulin-like growth factor-binding domain. The encoded protein may play a role in tissue development though interactions with members of the transforming growth factor beta family, such as bone morphogenetic proteins. [provided by RefSeq, Nov 2010]. Publication Note: This RefSeq record includes a subset o…	GO:0001558 (regulation of cell growth), GO:0007399 (nervous system development), GO:0010951 (negative regulation of endopeptidase activity), GO:0048009 (insulin-like growth factor receptor signaling pathway), GO:0005886 (plasma membrane), GO:0016021 (integral component of membrane), GO:0070062 (extracellular vesicular exosome), GO:0004867 (serine-type endopeptidase inhibitor activity), GO:0005010…		-0.631668	-0.276487	-0.584366		0.939128	0.829879	-0.276487				247.049	72.2462	35.2183	1.12482	5.73404	25.0196	0.00013701	0.00945876	6.32093e-07	6.83976e-07	0.121183	0.359018	0.143161	0.792118	0.752368	0.0603306	0.0843895		29.9643	38.887	31.0297	92.9558	86.0308	38.887
ENSG00000105701	FKBP8	PC	FK506 binding protein 8		The protein encoded by this gene is a member of the immunophilin protein family, which play a role in immunoregulation and basic cellular processes involving protein folding and trafficking. Unlike the other members of the family, this encoded protein does not seem to have PPIase/rotamase activity. It may have a role in neurons associated with memory function. [provided by RefSeq, Jul 2008]. Publ…	GO:0000413 (protein peptidyl-prolyl isomerization), GO:0001708 (cell fate specification), GO:0001933 (negative regulation of protein phosphorylation), GO:0006915 (apoptotic process), GO:0007224 (smoothened signaling pathway), GO:0016032 (viral process), GO:0021904 (dorsal/ventral neural tube patterning), GO:0030513 (positive regulation of BMP signaling pathway), GO:0035264 (multicellular organism…		0.0991469	0.192114	0.119792		-0.179394	-0.037978	-0.193681				246.93	97.2073	27.808	-0.274005	8.89242	23.2161	0.000198044	0.0105366	4.52705e-05	4.5662e-05	0.1	0.310247	0.0109207	-0.87831	-0.926391	0.0213116	0.00792792		506.196	540.023	513.521	416.97	460.118	412.841
ENSG00000198840	MT-ND3	PC	mitochondrially encoded NADH:ubiquinone oxidoreductase core subunit 3			hsa00190 (Oxidative phosphorylation), hsa01100 (Metabolic pathways), hsa04714 (Thermogenesis), hsa04723 (Retrograde endocannabinoid signaling), hsa05012 (Parkinson disease), R-HSA-1428517 (Homo sapiens: The citric acid (TCA) cycle and respiratory electron transport), R-HSA-1430728 (Homo sapiens: Metabolism), R-HSA-163200 (Homo sapiens: Respiratory electron transport, ATP synthesis by chemiosmotic…		-0.205357	-0.178985	-0.252156		0.469344	0.18537	-0.0182149				246.831	99.6196	1.53913	0.438378	11.0569	23.2028	0.000198597	0.0105366	5.64165e-05	5.69124e-05	0.1	0.310247	0.116396	0.87831	0.795941	0.0213116	0.0582119		1817.17	1850.73	1759.1	2901.87	2383.03	2069.13
ENSG00000151414	NEK7	PC	NIMA related kinase 7		NIMA-related kinases share high amino acid sequence identity with the gene product of the Aspergillus nidulans _never in mitosis A_ gene, which controls initiation of mitosis.[supplied by OMIM, Jul 2002]. Publication Note: This RefSeq record includes a subset of the publications that are available for this gene. Please see the Gene record to access additional publications.	hsa04621 (NOD-like receptor signaling pathway), GO:0000910 (cytokinesis), GO:0006468 (protein phosphorylation), GO:0007346 (regulation of mitotic cell cycle), GO:0032212 (positive regulation of telomere maintenance via telomerase), GO:0051225 (spindle assembly), GO:0051973 (positive regulation of telomerase activity), GO:1904355 (NA), GO:0000922 (spindle pole), GO:0005654 (nucleoplasm), GO:000573…		-0.508338	-0.276012	-0.287983		0.669208	0.359637	0.043487				246.267	47.19	30.7134	0.816875	4.21723	23.1266	0.000201791	0.0105541	7.43807e-06	8.34634e-06	0.1	0.310247	0.0774505	0.87831	0.841288	0.0213116	0.0357852		11.7194	14.1165	13.9833	29.0321	23.0392	18.1117
ENSG00000169398	PTK2	PC	protein tyrosine kinase 2		This gene encodes a cytoplasmic protein tyrosine kinase which is found concentrated in the focal adhesions that form between cells growing in the presence of extracellular matrix constituents. The encoded protein is a member of the FAK subfamily of protein tyrosine kinases but lacks significant sequence similarity to kinases from other subfamilies. Activation of this gene may be an important earl…	hsa01522 (Endocrine resistance), hsa04012 (ErbB signaling pathway), hsa04062 (Chemokine signaling pathway), hsa04151 (PI3K-Akt signaling pathway), hsa04360 (Axon guidance), hsa04370 (VEGF signaling pathway), hsa04510 (Focal adhesion), hsa04670 (Leukocyte transendothelial migration), hsa04810 (Regulation of actin cytoskeleton), hsa05100 (Bacterial invasion of epithelial cells), hsa05146 (Amoebiasi…		-0.147201	-0.320386	-0.255618		0.384551	0.354899	-0.0162449				246.158	76.0678	45.8885	0.50696	6.01571	23.112	0.000202412	0.0105541	7.49858e-06	7.64235e-06	0.1	0.310247	0.0669293	0.87831	0.851859	0.0213116	0.0312932		56.8655	50.2068	52.6039	83.1009	81.3697	62.4589
ENSG00000171241	SHCBP1	PC	SHC binding and spindle associated 1			GO:0008543 (fibroblast growth factor receptor signaling pathway), GO:2000177 (regulation of neural precursor cell proliferation), GO:0005737 (cytoplasm), GO:0005819 (spindle), GO:0030496 (midbody), GO:0005515 (protein binding), GO:0042169 (SH2 domain binding)		-0.190415	-0.300805	-0.206445		0.481315	0.192371	0.0239781				246.13	80.7107	28.7592	0.488538	6.36285	23.1082	0.000202571	0.0105541	7.77528e-06	7.91193e-06	0.1	0.310247	0.0915744	0.87831	0.827108	0.0213116	0.0422535		70.3162	64.9892	69.5171	113.198	92.29	81.9024
ENSG00000114867	EIF4G1	PC	eukaryotic translation initiation factor 4 gamma 1		The protein encoded by this gene is a component of the multi-subunit protein complex EIF4F. This complex facilitates the recruitment of mRNA to the ribosome, which is a rate-limiting step during the initiation phase of protein synthesis. The recognition of the mRNA cap and the ATP-dependent unwinding of 5_-terminal secondary structure is catalyzed by factors in this complex. The subunit encoded b…	hsa03013 (RNA transport), hsa05416 (Viral myocarditis), GO:0000184 (nuclear-transcribed mRNA catabolic process, nonsense-mediated decay), GO:0000289 (nuclear-transcribed mRNA poly(A) tail shortening), GO:0001662 (behavioral fear response), GO:0002191 (cap-dependent translational initiation), GO:0006412 (translation), GO:0006413 (translational initiation), GO:0006446 (regulation of translational i…		0.0707423	0.165683	0.201197		-0.247854	-0.0691623	-0.120607				245.971	95.9104	85.4994	-0.292547	8.42361	23.0867	0.000203489	0.0105541	3.17516e-05	3.20855e-05	0.1	0.310247	0.0105387	-0.87831	-0.916073	0.0213116	0.01027		358.24	382.744	392.332	286.858	324.946	313.493
ENSG00000148154	UGCG	PC	UDP-glucose ceramide glucosyltransferase		This gene encodes an enzyme that catalyzes the first glycosylation step in the biosynthesis of glycosphingolipids, which are membrane components containing lipid and sugar moieties. The product of this reaction is glucosylceramide, which is the core structure of many glycosphingolipids. [provided by RefSeq, Dec 2014]. Sequence Note: This RefSeq record was created from transcript and genomic seque…	hsa00600 (Sphingolipid metabolism), hsa01100 (Metabolic pathways), GO:0006679 (glucosylceramide biosynthetic process), GO:0006687 (glycosphingolipid metabolic process), GO:0006688 (glycosphingolipid biosynthetic process), GO:0008544 (epidermis development), GO:1903955 (NA), GO:0000139 (Golgi membrane), GO:0016020 (membrane), GO:0016021 (integral component of membrane), GO:0008120 (ceramide glucos…		-0.595549	-0.202848	-0.236953		0.531371	0.535417	-0.0314388				245.327	61.0756	40.7609	0.748247	5.02015	23	0.000207232	0.0106163	4.98403e-06	5.39854e-06	0.1	0.310247	0.0694368	0.87831	0.826451	0.0213116	0.0425653		19.7098	26.5017	25.8359	45.4125	45.5457	30.0974
ENSG00000116649	SRM	PC	spermidine synthase		The polyamines putrescine, spermine, and spermidine are ubiquitous polycationic mediators of cell growth and differentiation. Spermidine synthase is one of four enzymes in the polyamine-biosynthetic pathway and carries out the final step of spermidine biosynthesis. This enzyme catalyzes the conversion of putrescine to spermidine using decarboxylated S-adenosylmethionine as the cofactor. [provided…	hsa00270 (Cysteine and methionine metabolism), hsa00330 (Arginine and proline metabolism), hsa00410 (beta-Alanine metabolism), hsa00480 (Glutathione metabolism), hsa01100 (Metabolic pathways), GO:0006595 (polyamine metabolic process), GO:0008295 (spermidine biosynthetic process), GO:0005829 (cytosol), GO:0004766 (spermidine synthase activity), GO:0005515 (protein binding), GO:0042802 (identical p…		0.0471534	0.310437	0.148793		-0.301247	-0.089635	-0.115502				245.286	97.3716	8.64678	-0.340019	8.95809	22.9944	0.000207474	0.0106163	2.73431e-05	2.75777e-05	0.1	0.310247	0.0384135	-0.87831	-0.851528	0.0213116	0.0314296		508.86	611.138	546.149	399.257	462.648	454.392
ENSG00000115641	FHL2	PC	four and a half LIM domains 2		This gene encodes a member of the four-and-a-half-LIM-only protein family. Family members contain two highly conserved, tandemly arranged, zinc finger domains with four highly conserved cysteines binding a zinc atom in each zinc finger. This protein is thought to have a role in the assembly of extracellular membranes. Also, this gene is down-regulated during transformation of normal myoblasts to …	hsa04380 (Osteoclast differentiation), GO:0000122 (negative regulation of transcription from RNA polymerase II promoter), GO:0001649 (osteoblast differentiation), GO:0006351 (transcription, DNA-templated), GO:0009725 (response to hormone), GO:0030521 (androgen receptor signaling pathway), GO:0043066 (negative regulation of apoptotic process), GO:0045893 (positive regulation of transcription, DNA-…		-0.0852191	-0.134838	-0.203769		0.14843	0.153951	0.121446				245.186	91.6739	60.6226	0.284812	7.54894	22.981	0.000208063	0.0106163	2.57292e-05	2.61655e-05	0.1	0.310247	0.00651903	0.87831	0.973782	0.0213116	0.00102203		175.258	169.265	161.274	206.421	207.22	202.558
ENSG00000054116	TRAPPC3	PC	trafficking protein particle complex 3		This gene encodes a component of the trafficking protein particle complex, which tethers transport vesicles to the cis-Golgi membrane. The encoded protein participates in the regulation of transport from the endoplasmic reticulum to the Golgi apparatus. Alternative splicing results in multiple transcript variants. [provided by RefSeq, Aug 2012].	GO:0043547 (positive regulation of GTPase activity), GO:0048208 (COPII vesicle coating), GO:0061024 (membrane organization), GO:0000139 (Golgi membrane), GO:0005783 (endoplasmic reticulum), GO:0005794 (Golgi apparatus), GO:0005829 (cytosol), GO:0030008 (TRAPP complex), GO:0005515 (protein binding), GO:0017112 (Rab guanyl-nucleotide exchange factor activity), R-HSA-199977 (Homo sapiens: ER to Golg…		-0.0689027	-0.215375	-0.178525		0.172214	0.144662	0.145926				245.032	88.276	29.9265	0.311745	7.0935	22.9602	0.000208976	0.0106163	1.97134e-05	2.0113e-05	0.1	0.310247	0.0124537	0.87831	0.965969	0.0213116	0.00171749		129.046	116.395	119.458	152.884	149.955	150.088
ENSG00000206418	RAB12	PC	RAB12, member RAS oncogene family			GO:0006914 (autophagy), GO:0008333 (endosome to lysosome transport), GO:0015031 (protein transport), GO:0016239 (positive regulation of macroautophagy), GO:0044257 (cellular protein catabolic process), GO:0061024 (membrane organization), GO:0000139 (Golgi membrane), GO:0005764 (lysosome), GO:0005765 (lysosomal membrane), GO:0005768 (endosome), GO:0005776 (autophagic vacuole), GO:0005794 (Golgi ap…		-0.374844	-0.416661	-0.249896		0.753194	0.332927	-0.0447207				244.981	63.5916	43.7441	0.771391	5.17797	22.9533	0.000209279	0.0106163	4.58392e-06	4.93696e-06	0.1	0.310247	0.128079	0.87831	0.776942	0.0213116	0.069083		25.969	25.17	28.4994	59.1295	43.6813	33.1605
ENSG00000113811	SELENOK	PC	selenoprotein K		This gene encodes a selenoprotein, which contains a selenocysteine (Sec) residue at its active site. The selenocysteine is encoded by the UGA codon that normally signals translation termination. The 3_ UTR of selenoprotein genes have a common stem-loop structure, the sec insertion sequence (SECIS), that is necessary for the recognition of UGA as a Sec codon rather than as a stop signal. This sele…	GO:0002376 (immune system process), GO:0006816 (calcium ion transport), GO:0006979 (response to oxidative stress), GO:0032469 (endoplasmic reticulum calcium ion homeostasis), GO:0070059 (intrinsic apoptotic signaling pathway in response to endoplasmic reticulum stress), GO:0005783 (endoplasmic reticulum), GO:0005789 (endoplasmic reticulum membrane), GO:0005794 (Golgi apparatus), GO:0005886 (plasm…		-0.0616661	-0.179639	-0.229962		0.179939	0.195275	0.0960523				244.815	89.4345	13.0912	0.317186	7.26027	22.9311	0.000210264	0.0106197	1.95784e-05	1.9932e-05	0.1	0.310247	0.00641435	0.87831	0.940659	0.0213116	0.00517755		145.56	133.974	129.312	172.461	174.325	162.606
ENSG00000065548	ZC3H15	PC	zinc finger CCCH-type containing 15			GO:0019221 (cytokine-mediated signaling pathway), GO:0005730 (nucleolus), GO:0005829 (cytosol), GO:0003723 (RNA binding), GO:0005515 (protein binding), GO:0045296 (cadherin binding), GO:0046872 (metal ion binding)		-0.168974	-0.2547	-0.221953		0.342456	0.277775	0.0253962				244.194	74.9957	14.3969	0.450718	5.94053	22.8475	0.000214006	0.0107256	1.16398e-05	1.19237e-05	0.1	0.310247	0.0520466	0.87831	0.891549	0.0213116	0.0170046		53.403	50.2068	51.4054	76.9749	73.5124	61.3935
ENSG00000105732	ZNF574	PC	zinc finger protein 574			GO:0006351 (transcription, DNA-templated), GO:0006355 (regulation of transcription, DNA-templated), GO:0005634 (nucleus), GO:0003677 (DNA binding), GO:0046872 (metal ion binding)		0.224038	0.241631	0.219606		-0.349864	-0.147387	-0.188026				244.06	63.4359	86.5888	-0.479968	5.16731	22.8296	0.000214819	0.0107256	1.32521e-05	1.43842e-05	0.1	0.310247	0.011261	-0.87831	-0.974574	0.0213116	0.00096148		41.4173	41.95	41.2841	27.1676	31.5624	30.6301
ENSG00000074319	TSG101	PC	tumor susceptibility 101		The protein encoded by this gene belongs to a group of apparently inactive homologs of ubiquitin-conjugating enzymes. The gene product contains a coiled-coil domain that interacts with stathmin, a cytosolic phosphoprotein implicated in tumorigenesis. The protein may play a role in cell growth and differentiation and act as a negative growth regulator. In vitro steady-state expression of this tumo…	hsa04144 (Endocytosis), GO:0001558 (regulation of cell growth), GO:0006513 (protein monoubiquitination), GO:0007050 (cell cycle arrest), GO:0008285 (negative regulation of cell proliferation), GO:0008333 (endosome to lysosome transport), GO:0015031 (protein transport), GO:0016197 (endosomal transport), GO:0016236 (macroautophagy), GO:0019058 (viral life cycle), GO:0030216 (keratinocyte differenti…		-0.0584568	-0.17468	-0.197555		0.172312	0.126564	0.131816				244.007	92.2618	14.2412	0.288835	7.64406	22.8224	0.000215143	0.0107256	2.70242e-05	2.74523e-05	0.1	0.310247	0.00992984	0.87831	0.958437	0.0213116	0.00255529		190.706	175.79	172.994	224.133	217.075	217.874
ENSG00000164176	EDIL3	PC	EGF like repeats and discoidin domains 3		The protein encoded by this gene is an integrin ligand. It plays an important role in mediating angiogenesis and may be important in vessel wall remodeling and development. It also influences endothelial cell behavior. [provided by RefSeq, Jul 2008].	GO:0007155 (cell adhesion), GO:0007275 (multicellular organismal development), GO:0010811 (positive regulation of cell-substrate adhesion), GO:0031012 (extracellular matrix), GO:0070062 (extracellular vesicular exosome), GO:1903561 (extracellular vesicle), GO:0005178 (integrin binding), GO:0005509 (calcium ion binding)		-0.488072	-0.462545	-0.273123		0.635061	0.562316	0.026363				243.787	29.0852	87.0731	1.03539	3.21379	22.7927	0.000216499	0.0107329	8.1695e-06	9.81728e-06	0.1	0.310247	0.0647017	0.87831	0.866844	0.0213116	0.0254153		5.46016	5.59333	6.65873	14.2497	13.4506	8.65635
ENSG00000182899	RPL35A	PC	ribosomal protein L35a		Ribosomes, the organelles that catalyze protein synthesis, consist of a small 40S subunit and a large 60S subunit. Together these subunits are composed of 4 RNA species and approximately 80 structurally distinct proteins. This gene encodes a ribosomal protein that is a component of the 60S subunit. The protein belongs to the L35AE family of ribosomal proteins. It is located in the cytoplasm. The …	hsa03010 (Ribosome), GO:0000184 (nuclear-transcribed mRNA catabolic process, nonsense-mediated decay), GO:0006364 (rRNA processing), GO:0006412 (translation), GO:0006413 (translational initiation), GO:0006614 (SRP-dependent cotranslational protein targeting to membrane), GO:0019083 (viral transcription), GO:0042273 (ribosomal large subunit biogenesis), GO:0005739 (mitochondrion), GO:0005829 (cyto…		-0.140249	-0.210411	-0.155589		0.350254	0.117264	0.03873				243.682	98.9971	8.17985	0.343927	10.1982	22.7787	0.000217145	0.0107329	8.26272e-05	8.31724e-05	0.1	0.310247	0.0813915	0.87831	0.844082	0.0213116	0.0345706		1055.67	1005.47	1044.49	1483.96	1262.36	1195.37
ENSG00000104973	MED25	PC	mediator complex subunit 25		This gene encodes a component of the transcriptional coactivator complex termed the Mediator complex. This complex is required for transcription of most RNA polymerase II-dependent genes. The encoded protein plays a role in chromatin modification and in preinitiation complex assembly. Mutations in this gene are associated with Charcot-Marie-Tooth disease type 2B2. [provided by RefSeq, Apr 2010]. …	GO:0000122 (negative regulation of transcription from RNA polymerase II promoter), GO:0006367 (transcription initiation from RNA polymerase II promoter), GO:0035563 (positive regulation of chromatin binding), GO:0045944 (positive regulation of transcription from RNA polymerase II promoter), GO:0048147 (negative regulation of fibroblast proliferation), GO:0071158 (positive regulation of cell cycle…		0.273217	0.383665	0.13363		-0.538675	-0.0863611	-0.165476				243.374	74.7795	39.6628	-0.534959	5.92006	22.7373	0.000219056	0.0107813	6.71559e-06	6.8394e-06	0.1	0.310247	0.0231572	-0.87831	-0.879804	0.0213116	0.0208025		71.6479	77.5076	64.856	39.9524	55.4006	52.3376
ENSG00000102024	PLS3	PC	plastin 3		Plastins are a family of actin-binding proteins that are conserved throughout eukaryote evolution and expressed in most tissues of higher eukaryotes. In humans, two ubiquitous plastin isoforms (L and T) have been identified. Plastin 1 (otherwise known as Fimbrin) is a third distinct plastin isoform which is specifically expressed at high levels in the small intestine. The L isoform is expressed o…	GO:0051017 (actin filament bundle assembly), GO:0051639 (actin filament network formation), GO:0051764 (actin crosslink formation), GO:0060348 (bone development), GO:0005737 (cytoplasm), GO:0005829 (cytosol), GO:0005884 (actin filament), GO:0005886 (plasma membrane), GO:0032432 (actin filament bundle), GO:0005509 (calcium ion binding), GO:0051015 (actin filament binding)		-0.244724	-0.233863	-0.25201		0.437406	0.331713	-0.0385236				242.932	75.2551	64.2369	0.517447	5.95815	22.6781	0.000221826	0.0108714	8.89717e-06	9.07073e-06	0.1	0.310247	0.091669	0.87831	0.837727	0.0213116	0.0373625		50.8727	51.2722	50.6063	82.8346	76.8417	58.9963
ENSG00000145284	SCD5	PC	stearoyl-CoA desaturase 5		Stearoyl-CoA desaturase (SCD; EC 1.14.99.5) is an integral membrane protein of the endoplasmic reticulum that catalyzes the formation of monounsaturated fatty acids from saturated fatty acids. SCD may be a key regulator of energy metabolism with a role in obesity and dislipidemia. Four SCD isoforms, Scd1 through Scd4, have been identified in mouse. In contrast, only 2 SCD isoforms, SCD1 (MIM 6040…	hsa01040 (Biosynthesis of unsaturated fatty acids), hsa01212 (Fatty acid metabolism), hsa03320 (PPAR signaling pathway), hsa04152 (AMPK signaling pathway), GO:0006636 (unsaturated fatty acid biosynthetic process), GO:0035338 (long-chain fatty-acyl-CoA biosynthetic process), GO:0055114 (oxidation-reduction process), GO:0005789 (endoplasmic reticulum membrane), GO:0016021 (integral component of mem…		-0.282492	-0.138117	-0.387451		0.371062	0.310831	0.126166				242.735	56.0522	84.5741	0.580521	4.72922	22.6516	0.000223079	0.0108866	1.23361e-05	1.35765e-05	0.1	0.310247	0.00935869	0.87831	0.931448	0.0213116	0.00688807		20.7752	23.1724	19.1771	33.8263	32.3614	28.233
ENSG00000122958	VPS26A	PC	VPS26, retromer complex component A		This gene belongs to a group of vacuolar protein sorting (VPS) genes. The encoded protein is a component of a large multimeric complex, termed the retromer complex, involved in retrograde transport of proteins from endosomes to the trans-Golgi network. The close structural similarity between the yeast and human proteins that make up this complex suggests a similarity in function. Expression studi…	hsa04144 (Endocytosis), GO:0006886 (intracellular protein transport), GO:0016055 (Wnt signaling pathway), GO:0016241 (regulation of macroautophagy), GO:0042147 (retrograde transport, endosome to Golgi), GO:1990126 (retrograde transport, endosome to plasma membrane), GO:0005764 (lysosome), GO:0005768 (endosome), GO:0005769 (early endosome), GO:0005829 (cytosol), GO:0010008 (endosome membrane), GO:…		-0.150108	-0.280356	-0.368167		0.495789	0.25449	0.0483516				242.06	66.1594	48.3009	0.568734	5.33218	22.5612	0.000227411	0.0110514	9.83743e-06	1.0547e-05	0.1	0.310247	0.0612145	0.87831	0.854987	0.0213116	0.0300185		35.0249	31.8287	29.8311	55.9333	47.0106	40.4851
ENSG00000104960	PTOV1	PC	prostate tumor overexpressed 1			GO:0006351 (transcription, DNA-templated), GO:0006355 (regulation of transcription, DNA-templated), GO:0005634 (nucleus), GO:0005886 (plasma membrane), GO:0048471 (perinuclear region of cytoplasm)		0.096563	0.238104	0.106488		-0.227355	-0.149703	-0.0640955				241.296	94.4752	27.7216	-0.29619	8.08007	22.4588	0.000232432	0.0111462	3.37137e-05	3.4128e-05	0.1	0.310247	0.0124111	-0.87831	-0.910988	0.0213116	0.011532		287.391	317.222	289.388	229.193	241.978	256.894
ENSG00000131013	PPIL4	PC	peptidylprolyl isomerase like 4		This gene is a member of the cyclophilin family of peptidylprolyl isomerases. The cyclophilins are a highly conserved family, members of which play an important role in protein folding, immunosuppression by cyclosporin A, and infection of HIV-1 virions. [provided by RefSeq, Jul 2008].	GO:0000413 (protein peptidyl-prolyl isomerization), GO:0006457 (protein folding), GO:0005654 (nucleoplasm), GO:0005829 (cytosol), GO:0003723 (RNA binding), GO:0003755 (peptidyl-prolyl cis-trans isomerase activity)		-0.326519	-0.338795	-0.24339		0.52545	0.183091	0.200162				241.282	47.0085	61.3316	0.683138	4.2086	22.457	0.000232521	0.0111462	1.61639e-05	1.81659e-05	0.1	0.310247	0.0457008	0.87831	0.905783	0.0213116	0.0128971		13.717	13.5838	14.6492	26.3686	20.3757	20.6421
ENSG00000283936	MIR3658	miRNA	microRNA 3658					-0.335456	-0.301245	-0.48104		0.764738	0.378159	-0.0251561				241.024	49.4639	0.0172936	0.860166	4.34563	22.4225	0.000234243	0.0111462	8.26633e-06	9.1916e-06	0.1	0.310247	0.113496	0.87831	0.797699	0.0213116	0.0572491		14.6492	15.0487	13.0511	33.6932	25.3032	18.6444
ENSG00000155380	SLC16A1	PC	solute carrier family 16 member 1		The protein encoded by this gene is a proton-linked monocarboxylate transporter that catalyzes the movement of many monocarboxylates, such as lactate and pyruvate, across the plasma membrane. Mutations in this gene are associated with erythrocyte lactate transporter defect. Alternatively spliced transcript variants have been found for this gene.[provided by RefSeq, Oct 2009].	GO:0006090 (pyruvate metabolic process), GO:0006629 (lipid metabolic process), GO:0015718 (monocarboxylic acid transport), GO:0015728 (mevalonate transport), GO:0032094 (response to food), GO:0035879 (plasma membrane lactate transport), GO:0042593 (glucose homeostasis), GO:0050796 (regulation of insulin secretion), GO:0050900 (leukocyte migration), GO:0051297 (centrosome organization), GO:0051780…		-0.219143	-0.361864	-0.338967		0.337609	0.517748	0.0646166				240.838	49.3775	70.3329	0.687894	4.3409	22.3976	0.000235493	0.0111462	1.41814e-05	1.58145e-05	0.1	0.310247	0.0532219	0.87831	0.886078	0.0213116	0.0187282		16.3805	14.6492	14.9156	25.0368	28.6325	20.3757
ENSG00000112245	PTP4A1	PC	protein tyrosine phosphatase type IVA, member 1		This gene encodes a member of a small class of prenylated protein tyrosine phosphatases (PTPs), which contain a PTP domain and a characteristic C-terminal prenylation motif. The encoded protein is a cell signaling molecule that plays regulatory roles in a variety of cellular processes, including cell proliferation and migration. The protein may also be involved in cancer development and metastasi…	GO:0007049 (cell cycle), GO:0007275 (multicellular organismal development), GO:0030335 (positive regulation of cell migration), GO:0035335 (peptidyl-tyrosine dephosphorylation), GO:0005634 (nucleus), GO:0005737 (cytoplasm), GO:0005769 (early endosome), GO:0005783 (endoplasmic reticulum), GO:0005819 (spindle), GO:0009898 (cytoplasmic side of plasma membrane), GO:0070062 (extracellular vesicular ex…		-0.289232	-0.225462	-0.416974		0.569527	0.377535	-0.0153953				240.754	57.4356	45.9836	0.686278	4.80792	22.3864	0.00023606	0.0111462	1.00246e-05	1.0929e-05	0.1	0.310247	0.0831904	0.87831	0.836076	0.0213116	0.0381043		21.5743	22.6397	19.5767	40.7514	35.4244	26.5017
ENSG00000174738	NR1D2	PC	nuclear receptor subfamily 1 group D member 2		This gene encodes a member of the nuclear hormone receptor family, specifically the NR1 subfamily of receptors. The encoded protein functions as a transcriptional repressor and may play a role in circadian rhythms and carbohydrate and lipid metabolism. Alternatively spliced transcript variants have been described. [provided by RefSeq, Feb 2009].	GO:0006355 (regulation of transcription, DNA-templated), GO:0006367 (transcription initiation from RNA polymerase II promoter), GO:0019216 (regulation of lipid metabolic process), GO:0030522 (intracellular receptor signaling pathway), GO:0042752 (regulation of circadian rhythm), GO:0043401 (steroid hormone mediated signaling pathway), GO:0045892 (negative regulation of transcription, DNA-template…		-0.261626	-0.355661	-0.311497		0.625463	0.332602	-0.0292817				240.554	60.9113	81.591	0.684534	5.01224	22.3596	0.000237417	0.0111462	8.98148e-06	9.71142e-06	0.1	0.310247	0.106707	0.87831	0.811661	0.0213116	0.0498673		25.4363	23.7051	24.5041	48.7419	39.4197	30.2306
ENSG00000161800	RACGAP1	PC	Rac GTPase activating protein 1		The protein encoded by this gene belongs to the GTPase-activating protein (GAP) family. GAPs bind activated forms of Rho GTPases and stimulate GTP hydrolysis. Through this catalytic function, GAPs negatively regulate Rho-mediated signals. This protein plays a regulatory role in initiation of cytokinesis, controlling cell growth and differentiation of hematopoietic cells, regulating spermatogenesi…	GO:0000281 (mitotic cytokinesis), GO:0000915 (actomyosin contractile ring assembly), GO:0006890 (retrograde vesicle-mediated transport, Golgi to ER), GO:0007018 (microtubule-based movement), GO:0007283 (spermatogenesis), GO:0007405 (neuroblast proliferation), GO:0008272 (sulfate transport), GO:0019886 (antigen processing and presentation of exogenous peptide antigen via MHC class II), GO:0032467 …		-0.168472	-0.314008	-0.192965		0.465817	0.185156	0.0244717				240.527	81.973	21.9715	0.471074	6.47113	22.356	0.000237599	0.0111462	1.10156e-05	1.12138e-05	0.1	0.310247	0.0874667	0.87831	0.825042	0.0213116	0.0432376		77.1081	69.5171	75.7763	120.789	99.0819	88.4279
ENSG00000213977	TAX1BP3	PC	Tax1 binding protein 3			GO:0007266 (Rho protein signal transduction), GO:0008285 (negative regulation of cell proliferation), GO:0016055 (Wnt signaling pathway), GO:0030178 (negative regulation of Wnt signaling pathway), GO:0090630 (NA), GO:2000009 (negative regulation of protein localization to cell surface), GO:0001650 (fibrillar center), GO:0005737 (cytoplasm), GO:0005829 (cytosol), GO:0005886 (plasma membrane), GO:0…		-0.236855	-0.374349	-0.200594		0.554636	0.17947	0.0776915				240.477	67.4131	44.7903	0.580936	5.4088	22.3493	0.000237942	0.0111462	1.01603e-05	1.08542e-05	0.1	0.310247	0.0849896	0.87831	0.83041	0.0213116	0.0407022		34.6254	31.296	35.5576	61.3935	46.8774	43.5481
ENSG00000223812	AC073365.1	lincRNA						-0.166536	-0.402218	-0.149906		0.419795	0.164548	0.134317				240.463	71.1482	9.59792	0.499627	5.66504	22.3475	0.000238035	0.0111462	1.12071e-05	1.14755e-05	0.1	0.310247	0.0280244	0.87831	0.882308	0.0213116	0.0199621		43.9476	37.0225	44.4803	66.9868	55.8001	54.6016
ENSG00000180340	FZD2	PC	frizzled class receptor 2		This intronless gene is a member of the frizzled gene family. Members of this family encode seven-transmembrane domain proteins that are receptors for the wingless type MMTV integration site family of signaling proteins. This gene encodes a protein that is coupled to the beta-catenin canonical signaling pathway. Competition between the wingless-type MMTV integration site family, member 3A and win…	hsa04150 (mTOR signaling pathway), hsa04310 (Wnt signaling pathway), hsa04390 (Hippo signaling pathway), hsa04550 (Signaling pathways regulating pluripotency of stem cells), hsa04916 (Melanogenesis), hsa04934 (Cushing syndrome), hsa05165 (Human papillomavirus infection), hsa05200 (Pathways in cancer), hsa05205 (Proteoglycans in cancer), hsa05217 (Basal cell carcinoma), hsa05224 (Breast cancer), h…		0.164295	0.162831	0.261877		-0.395274	-0.0600451	-0.133684				240.16	86.1231	76.3943	-0.393047	6.8681	22.307	0.000240109	0.0111766	1.41684e-05	1.44253e-05	0.1	0.310247	0.0308246	-0.87831	-0.899351	0.0213116	0.0146855		129.312	129.179	138.502	87.0962	110.402	104.808
ENSG00000167123	CERCAM	PC	cerebral endothelial cell adhesion molecule			GO:0006928 (cellular component movement), GO:0007155 (cell adhesion), GO:0007159 (leukocyte cell-cell adhesion), GO:0005788 (endoplasmic reticulum lumen), GO:0005886 (plasma membrane)		0.190828	0.200011	0.124855		-0.207711	-0.234677	-0.0733059				240.086	82.3448	41.8936	-0.350051	6.49724	22.2972	0.000240617	0.0111766	1.95284e-05	2.00215e-05	0.1	0.310247	0.00563603	-0.87831	-0.956761	0.0213116	0.00276397		102.278	102.944	97.6169	77.1081	75.6431	84.8322
ENSG00000143222	UFC1	PC	ubiquitin-fold modifier conjugating enzyme 1		UFC1 is an E2-like conjugating enzyme for ubiquitin-fold modifier-1 (UFM1; MIM 610553) (Komatsu et al., 2004 [PubMed 15071506]).[supplied by OMIM, Mar 2008].	GO:0034976 (response to endoplasmic reticulum stress), GO:0071569 (protein ufmylation), GO:1990592 (NA), GO:0005737 (cytoplasm), GO:0070062 (extracellular vesicular exosome), GO:0005515 (protein binding), GO:0071568 (UFM1 conjugating enzyme activity)		-0.0928196	-0.262741	-0.110897		0.173891	0.114089	0.178478				239.942	89.0282	9.97838	0.313479	7.2047	22.2779	0.000241614	0.011178	2.49273e-05	2.53962e-05	0.1	0.310247	0.0109835	0.87831	0.946643	0.0213116	0.00419447		137.037	121.588	135.305	165.27	158.478	165.802
ENSG00000109133	TMEM33	PC	transmembrane protein 33			GO:0008150 (biological_process), GO:0034613 (cellular protein localization), GO:0034976 (response to endoplasmic reticulum stress), GO:0051292 (nuclear pore complex assembly), GO:1903371 (regulation of endoplasmic reticulum tubular network organization), GO:1903896 (NA), GO:1903899 (NA), GO:0005635 (nuclear envelope), GO:0005643 (nuclear pore), GO:0005783 (endoplasmic reticulum), GO:0005789 (endo…		-0.265959	-0.346561	-0.330077		0.477153	0.243819	0.221626				239.585	38.4748	82.0925	0.732092	3.74244	22.2302	0.000244103	0.011217	1.90762e-05	2.20774e-05	0.1	0.310247	0.0225329	0.87831	0.948703	0.0213116	0.00387957		10.2544	9.58857	9.72174	18.5113	15.4482	15.1819
ENSG00000197747	S100A10	PC	S100 calcium binding protein A10		The protein encoded by this gene is a member of the S100 family of proteins containing 2 EF-hand calcium-binding motifs. S100 proteins are localized in the cytoplasm and/or nucleus of a wide range of cells, and involved in the regulation of a number of cellular processes such as cell cycle progression and differentiation. S100 genes include at least 13 members which are located as a cluster on ch…	GO:0001765 (membrane raft assembly), GO:0006900 (membrane budding), GO:0042493 (response to drug), GO:0043547 (positive regulation of GTPase activity), GO:0051099 (positive regulation of binding), GO:0051290 (protein heterotetramerization), GO:0051496 (positive regulation of stress fiber assembly), GO:0051894 (positive regulation of focal adhesion assembly), GO:0090002 (establishment of protein l…		-0.123656	-0.222368	-0.14725		0.339012	0.0653841	0.0888786				239.543	98.9884	8.36144	0.334222	10.1939	22.2246	0.000244395	0.011217	0.000107185	0.00010787	0.1	0.310247	0.0720455	0.87831	0.848298	0.0213116	0.0327747		1065.26	994.681	1047.95	1468.78	1214.69	1234.66
ENSG00000110958	PTGES3	PC	prostaglandin E synthase 3			hsa00590 (Arachidonic acid metabolism), hsa01100 (Metabolic pathways), GO:0000723 (telomere maintenance), GO:0001516 (prostaglandin biosynthetic process), GO:0006805 (xenobiotic metabolic process), GO:0007004 (telomere maintenance via telomerase), GO:0007165 (signal transduction), GO:0019371 (cyclooxygenase pathway), GO:0042327 (positive regulation of phosphorylation), GO:0050821 (protein stabili…		-0.43864	-0.0562505	-0.244736		0.437188	0.283041	0.0193978				239.393	84.3939	59.9049	0.504537	6.6913	22.2046	0.000245447	0.0112207	9.41251e-06	9.56261e-06	0.1	0.310247	0.0511579	0.87831	0.826457	0.0213116	0.0425622		73.9119	96.9511	84.8322	137.303	123.186	102.278
ENSG00000115295	CLIP4	PC	CAP-Gly domain containing linker protein family member 4			GO:0043231 (intracellular membrane-bounded organelle), GO:0005515 (protein binding)		-0.468346	-0.33096	-0.468346		0.601368	0.457042	0.209242				239.304	0.0172921	61.7899	1.9552	1.09139	21.9627	0.00025861	0.0115486	1.82801e-06	3.24196e-06	0.0765225	0.310247	0.0243062	0.891133	0.941554	0.017133	0.005024		0.665873	0.932222	0.665873	3.59571	3.06301	2.26397
ENSG00000261236	BOP1	PC	block of proliferation 1			GO:0000448 (cleavage in ITS2 between 5.8S rRNA and LSU-rRNA of tricistronic rRNA transcript (SSU-rRNA, 5.8S rRNA, LSU-rRNA)), GO:0000463 (maturation of LSU-rRNA from tricistronic rRNA transcript (SSU-rRNA, 5.8S rRNA, LSU-rRNA)), GO:0006364 (rRNA processing), GO:0008283 (cell proliferation), GO:0042254 (ribosome biogenesis), GO:0051726 (regulation of cell cycle), GO:0005634 (nucleus), GO:0005654 (…		0.0449321	0.282872	0.193696		-0.21462	-0.0621727	-0.244708				238.793	89.1925	21.3403	-0.353427	7.22303	22.1247	0.000249712	0.0113707	2.09664e-05	2.13173e-05	0.1	0.310247	0.0254578	-0.87831	-0.883466	0.0213116	0.0195789		152.485	180.185	169.265	127.049	141.431	124.385
ENSG00000164611	PTTG1	PC	pituitary tumor-transforming 1		The encoded protein is a homolog of yeast securin proteins, which prevent separins from promoting sister chromatid separation. It is an anaphase-promoting complex (APC) substrate that associates with a separin until activation of the APC. The gene product has transforming activity in vitro and tumorigenic activity in vivo, and the gene is highly expressed in various tumors. The gene product conta…	hsa04110 (Cell cycle), hsa04114 (Oocyte meiosis), hsa05166 (Human T-cell leukemia virus 1 infection), GO:0006281 (DNA repair), GO:0006357 (regulation of transcription from RNA polymerase II promoter), GO:0006366 (transcription from RNA polymerase II promoter), GO:0007067 (mitotic nuclear division), GO:0007283 (spermatogenesis), GO:0010951 (negative regulation of endopeptidase activity), GO:003114…		-0.174318	-0.174844	-0.101501		0.289267	0.118817	0.0425787				238.542	98.4869	11.8634	0.304482	9.69428	22.0912	0.00025152	0.0114057	0.000100999	0.00010166	0.1	0.310247	0.057265	0.87831	0.872791	0.0213116	0.023244		728.598	728.332	766.42	1005.47	893.202	847.123
ENSG00000158290	CUL4B	PC	cullin 4B		This gene is a member of the cullin family. The encoded protein forms a complex that functions as an E3 ubiquitin ligase and catalyzes the polyubiquitination of specific protein substrates in the cell. The protein interacts with a ring finger protein, and is required for the proteolysis of several regulators of DNA replication including chromatin licensing and DNA replication factor 1 and cyclin …	hsa03420 (Nucleotide excision repair), hsa04120 (Ubiquitin mediated proteolysis), hsa05170 (Human immunodeficiency virus 1 infection), GO:0000715 (nucleotide-excision repair, DNA damage recognition), GO:0000717 (nucleotide-excision repair, DNA duplex unwinding), GO:0006283 (transcription-coupled nucleotide-excision repair), GO:0006293 (nucleotide-excision repair, preincision complex stabilization…		-0.105118	-0.372291	-0.416682		0.599272	0.210551	0.0842684				238.414	65.5801	77.1725	0.638197	5.29678	22.0741	0.000252451	0.0114057	9.60925e-06	1.02897e-05	0.1	0.310247	0.0748479	0.87831	0.819152	0.0213116	0.0461014		35.0249	28.7657	27.8335	58.3305	44.0808	40.2187
ENSG00000173915	ATP5MD	PC	ATP synthase membrane subunit DAPIT			GO:0005739 (mitochondrion), GO:0005753 (mitochondrial proton-transporting ATP synthase complex), GO:0016021 (integral component of membrane), GO:0070062 (extracellular vesicular exosome)		-0.144456	-0.152307	-0.16615		0.20346	0.162907	0.0965468				238.224	84.8003	6.47644	0.315021	6.74692	22.0489	0.000253828	0.0114233	2.84514e-05	2.91496e-05	0.1	0.310247	0.0105998	0.87831	0.975424	0.0213116	0.00089857		96.152	95.6193	94.6871	122.92	119.458	113.997
ENSG00000129474	AJUBA	PC	ajuba LIM protein			hsa04390 (Hippo signaling pathway), hsa04392 (Hippo signaling pathway - multiple species), GO:0000086 (G2/M transition of mitotic cell cycle), GO:0000122 (negative regulation of transcription from RNA polymerase II promoter), GO:0001666 (response to hypoxia), GO:0006351 (transcription, DNA-templated), GO:0006355 (regulation of transcription, DNA-templated), GO:0007010 (cytoskeleton organization),…		-0.0521666	-0.471976	-0.355029		0.537552	0.218025	0.123595				237.655	66.6263	56.4202	0.615547	5.35818	21.9732	0.000258021	0.0115486	9.80121e-06	1.04795e-05	0.1	0.310247	0.0434054	0.87831	0.841192	0.0213116	0.0358273		38.0879	27.9667	30.497	58.3305	46.3447	43.2817
ENSG00000151702	FLI1	PC	Fli-1 proto-oncogene, ETS transcription factor		This gene encodes a transcription factor containing an ETS DNA-binding domain. The gene can undergo a t(11;22)(q24;q12) translocation with the Ewing sarcoma gene on chromosome 22, which results in a fusion gene that is present in the majority of Ewing sarcoma cases. An acute lymphoblastic leukemia-associated t(4;11)(q21;q23) translocation involving this gene has also been identified. Alternative …	hsa05202 (Transcriptional misregulation in cancer), GO:0006357 (regulation of transcription from RNA polymerase II promoter), GO:0006366 (transcription from RNA polymerase II promoter), GO:0007599 (hemostasis), GO:0008015 (blood circulation), GO:0009887 (organ morphogenesis), GO:0030154 (cell differentiation), GO:0035855 (megakaryocyte development), GO:0045944 (positive regulation of transcriptio…		-0.460002	-0.358482	-0.126157		0.454755	0.249552	0.240334				236.855	43.8354	90.8258	0.706522	4.02999	21.8668	0.000264043	0.011663	1.66529e-05	1.89126e-05	0.1	0.310247	0.00646417	0.87831	0.934404	0.0213116	0.0063131		10.7871	11.7194	14.1165	22.107	18.9108	18.7776
ENSG00000049449	RCN1	PC	reticulocalbin 1		Reticulocalbin 1 is a calcium-binding protein located in the lumen of the ER. The protein contains six conserved regions with similarity to a high affinity Ca(+2)-binding motif, the EF-hand. High conservation of amino acid residues outside of these motifs, in comparison to mouse reticulocalbin, is consistent with a possible biochemical function besides that of calcium binding. In human endothelia…	GO:0001701 (in utero embryonic development), GO:0043010 (camera-type eye development), GO:0005783 (endoplasmic reticulum), GO:0005788 (endoplasmic reticulum lumen), GO:0005509 (calcium ion binding), GO:0005515 (protein binding)		-0.149684	-0.230482	-0.158353		0.342235	0.235578	-0.039294				236.787	94.5271	41.5997	0.370045	8.09057	21.8578	0.000264562	0.011663	2.50446e-05	2.53307e-05	0.1	0.310247	0.0945458	0.87831	0.822644	0.0213116	0.0443932		242.511	229.193	241.046	341.859	317.355	261.954
ENSG00000019549	SNAI2	PC	snail family transcriptional repressor 2		This gene encodes a member of the Snail family of C2H2-type zinc finger transcription factors. The encoded protein acts as a transcriptional repressor that binds to E-box motifs and is also likely to repress E-cadherin transcription in breast carcinoma. This protein is involved in epithelial-mesenchymal transitions and has antiapoptotic activity. Mutations in this gene may be associated with spor…	hsa04390 (Hippo signaling pathway), hsa04520 (Adherens junction), GO:0000122 (negative regulation of transcription from RNA polymerase II promoter), GO:0001649 (osteoblast differentiation), GO:0001837 (epithelial to mesenchymal transition), GO:0003198 (epithelial to mesenchymal transition involved in endocardial cushion formation), GO:0003273 (cell migration involved in endocardial cushion format…		-0.327665	-0.16194	-0.230648		0.302539	0.362078	0.0556373				236.716	64.4129	43.5192	0.510985	5.22325	21.8484	0.000265103	0.011663	1.74605e-05	1.88114e-05	0.1	0.310247	0.0330373	0.87831	0.904127	0.0213116	0.0133468		28.6325	32.3614	30.7633	45.4125	47.4101	37.9547
ENSG00000138430	OLA1	PC	Obg like ATPase 1			GO:0002576 (platelet degranulation), GO:0046034 (ATP metabolic process), GO:0005576 (extracellular region), GO:0005730 (nucleolus), GO:0005737 (cytoplasm), GO:0005813 (centrosome), GO:0005829 (cytosol), GO:0016020 (membrane), GO:0031093 (platelet alpha granule lumen), GO:0070062 (extracellular vesicular exosome), GO:0005515 (protein binding), GO:0005524 (ATP binding), GO:0005525 (GTP binding), GO…		-0.085523	-0.112974	-0.279244		0.137944	0.180022	0.159774				236.702	88.0858	48.7851	0.320812	7.06772	21.8466	0.000265206	0.011663	2.68229e-05	2.73556e-05	0.1	0.310247	0.0215286	0.87831	0.944933	0.0213116	0.0044651		125.184	122.787	109.203	146.492	150.887	148.756
ENSG00000133773	CCDC59	PC	coiled-coil domain containing 59			GO:0006351 (transcription, DNA-templated), GO:0006355 (regulation of transcription, DNA-templated), GO:0044267 (cellular protein metabolic process), GO:0005654 (nucleoplasm), GO:0003723 (RNA binding), GO:0005515 (protein binding), R-HSA-1643685 (Homo sapiens: Disease), R-HSA-392499 (Homo sapiens: Metabolism of proteins), R-HSA-5668914 (Homo sapiens: Diseases of metabolism), R-HSA-5683826 (Homo sa…		-0.141777	-0.164144	-0.348218		0.374994	0.127398	0.151747				235.864	73.4048	24.2369	0.453259	5.81704	21.7353	0.000271704	0.0118854	1.75111e-05	1.79747e-05	0.1	0.310247	0.0238718	0.87831	0.896001	0.0213116	0.0156613		49.9405	49.1414	43.0154	72.3138	60.5944	61.6598
ENSG00000172354	GNB2	PC	G protein subunit beta 2		Heterotrimeric guanine nucleotide-binding proteins (G proteins), which integrate signals between receptors and effector proteins, are composed of an alpha, a beta, and a gamma subunit. These subunits are encoded by families of related genes. This gene encodes a beta subunit. Beta subunits are important regulators of alpha subunits, as well as of certain signal transduction receptors and effectors…	hsa04014 (Ras signaling pathway), hsa04062 (Chemokine signaling pathway), hsa04151 (PI3K-Akt signaling pathway), hsa04371 (Apelin signaling pathway), hsa04713 (Circadian entrainment), hsa04723 (Retrograde endocannabinoid signaling), hsa04724 (Glutamatergic synapse), hsa04725 (Cholinergic synapse), hsa04726 (Serotonergic synapse), hsa04727 (GABAergic synapse), hsa04728 (Dopaminergic synapse), hsa0…		0.0818334	0.264458	0.163098		-0.354285	-0.0904147	-0.0646888				235.786	97.3197	39.6368	-0.337091	8.94106	21.725	0.000272319	0.0118854	4.19707e-05	4.23324e-05	0.1	0.310247	0.0311927	-0.87831	-0.860874	0.0213116	0.0276876		515.119	584.903	545.083	380.213	456.922	465.179
ENSG00000179010	MRFAP1	PC	Morf4 family associated protein 1		This gene encodes an intracellular protein that interacts with members of the MORF4/MRG (mortality factor on chromosome 4/MORF4 related gene) family and the tumor suppressor Rb (retinoblastoma protein.) The protein may play a role in senescence, cell growth and immortalization. Alternative splicing results in multiple transcript variants. [provided by RefSeq, Jan 2013].	GO:0005634 (nucleus), GO:0005829 (cytosol), GO:0048471 (perinuclear region of cytoplasm), GO:0005515 (protein binding)		-0.167055	-0.0898748	-0.123005		0.167877	0.125417	0.0866401				235.375	98.6599	61.1933	0.253878	9.83528	21.6705	0.000275578	0.0119188	0.000248585	0.000249978	0.1	0.310247	0.00182483	0.87831	0.968191	0.0213116	0.00150165		809.834	854.448	835.004	1021.98	992.284	965.915
ENSG00000149091	DGKZ	PC	diacylglycerol kinase zeta		The protein encoded by this gene belongs to the eukaryotic diacylglycerol kinase family. It may attenuate protein kinase C activity by regulating diacylglycerol levels in intracellular signaling cascade and signal transduction. Alternative splicing occurs at this locus and multiple transcript variants encoding distinct isoforms have been identified. [provided by RefSeq, Nov 2010].	hsa00561 (Glycerolipid metabolism), hsa00564 (Glycerophospholipid metabolism), hsa01100 (Metabolic pathways), hsa04070 (Phosphatidylinositol signaling system), hsa04072 (Phospholipase D signaling pathway), hsa05231 (Choline metabolism in cancer), GO:0007205 (protein kinase C-activating G-protein coupled receptor signaling pathway), GO:0016477 (cell migration), GO:0030168 (platelet activation), GO…		0.212868	0.216274	0.223063		-0.387493	-0.149685	-0.115026				235.349	69.6697	77.7086	-0.448153	5.56982	21.6671	0.000275783	0.0119188	1.77396e-05	1.89395e-05	0.1	0.310247	0.0262272	-0.87831	-0.94896	0.0213116	0.00384109		54.3352	54.4684	54.7347	35.1581	41.8168	42.8822
ENSG00000117335	CD46	PC	CD46 molecule		The protein encoded by this gene is a type I membrane protein and is a regulatory part of the complement system. The encoded protein has cofactor activity for inactivation of complement components C3b and C4b by serum factor I, which protects the host cell from damage by complement. In addition, the encoded protein can act as a receptor for the Edmonston strain of measles virus, human herpesvirus…	hsa04610 (Complement and coagulation cascades), hsa05162 (Measles), GO:0002250 (adaptive immune response), GO:0002456 (T cell mediated immunity), GO:0006508 (proteolysis), GO:0006958 (complement activation, classical pathway), GO:0007338 (single fertilization), GO:0008593 (regulation of Notch signaling pathway), GO:0010628 (positive regulation of gene expression), GO:0010629 (negative regulation …		-0.277277	-0.176802	-0.163627		0.302919	0.208125	0.106662				235.3	69.9983	81.0808	0.430533	5.58658	21.6606	0.000276174	0.0119188	2.27894e-05	2.35462e-05	0.1	0.310247	0.0120896	0.87831	0.944428	0.0213116	0.00454658		38.6206	41.5505	41.95	58.73	54.8679	51.0059
ENSG00000198431	TXNRD1	PC	thioredoxin reductase 1		This gene encodes a member of the family of pyridine nucleotide oxidoreductases. This protein reduces thioredoxins as well as other substrates, and plays a role in selenium metabolism and protection against oxidative stress. The functional enzyme is thought to be a homodimer which uses FAD as a cofactor. Each subunit contains a selenocysteine (Sec) residue which is required for catalytic activity…	hsa00450 (Selenocompound metabolism), hsa05200 (Pathways in cancer), hsa05225 (Hepatocellular carcinoma), GO:0000302 (response to reactive oxygen species), GO:0000305 (response to oxygen radical), GO:0001887 (selenium compound metabolic process), GO:0007165 (signal transduction), GO:0015949 (nucleobase-containing small molecule interconversion), GO:0045454 (cell redox homeostasis), GO:0055114 (ox…		0.257279	0.127972	0.0955715		-0.0691272	-0.128488	-0.283208				234.959	92.1408	73.4198	-0.322705	7.62456	21.6155	0.00027891	0.0119597	3.23871e-05	3.2861e-05	0.1	0.310247	0.0156495	-0.87831	-0.896043	0.0213116	0.0156488		234.121	213.878	209.084	186.311	178.72	160.342
ENSG00000149823	VPS51	PC	VPS51, GARP complex subunit		This gene encodes a member of the vacuolar protein sorting-associated protein 51 family. The encoded protein is a component of the Golgi-associated retrograde protein complex which acts as a tethering factor for carriers in retrograde transport from the early and late endosomes to the trans-Golgi network. Alternative splicing results in multiple transcript variants. [provided by RefSeq, Dec 2012].	GO:0006869 (lipid transport), GO:0006914 (autophagy), GO:0007030 (Golgi organization), GO:0007041 (lysosomal transport), GO:0015031 (protein transport), GO:0032456 (endocytic recycling), GO:0042147 (retrograde transport, endosome to Golgi), GO:0048193 (Golgi vesicle transport), GO:0000938 (GARP complex), GO:0005730 (nucleolus), GO:0005794 (Golgi apparatus), GO:0005802 (trans-Golgi network), GO:00…		0.187812	0.324604	0.207073		-0.408797	-0.0521265	-0.258565				234.925	67.4131	22.2741	-0.496157	5.4088	21.6109	0.00027919	0.0119597	1.55043e-05	1.66054e-05	0.1	0.310247	0.0161491	-0.87831	-0.918913	0.0213116	0.00959602		47.5433	52.4708	48.2092	30.7633	39.9524	34.359
ENSG00000070831	CDC42	PC	cell division cycle 42		The protein encoded by this gene is a small GTPase of the Rho-subfamily, which regulates signaling pathways that control diverse cellular functions including cell morphology, migration, endocytosis and cell cycle progression. This protein is highly similar to Saccharomyces cerevisiae Cdc 42, and is able to complement the yeast cdc42-1 mutant. The product of oncogene Dbl was reported to specifical…	hsa04010 (MAPK signaling pathway), hsa04014 (Ras signaling pathway), hsa04015 (Rap1 signaling pathway), hsa04062 (Chemokine signaling pathway), hsa04144 (Endocytosis), hsa04360 (Axon guidance), hsa04370 (VEGF signaling pathway), hsa04510 (Focal adhesion), hsa04520 (Adherens junction), hsa04530 (Tight junction), hsa04660 (T cell receptor signaling pathway), hsa04666 (Fc gamma R-mediated phagocytos…		-0.0960498	-0.253876	-0.195317		0.352234	0.178768	0.0142414				234.648	90.3597	52.4946	0.373107	7.36557	21.5743	0.000281433	0.0120113	2.38802e-05	2.42409e-05	0.1	0.310247	0.0653717	0.87831	0.842581	0.0213116	0.0352205		152.219	136.238	141.964	208.418	184.58	164.471
ENSG00000167700	MFSD3	PC	major facilitator superfamily domain containing 3			GO:0006810 (transport), GO:0015992 (proton transport), GO:0055085 (transmembrane transport), GO:0005887 (integral component of plasma membrane), GO:0015295 (solute:proton symporter activity)		0.186828	0.186828	0.272643		-0.164461	-0.212753	-0.269086				234.523	62.8739	34.6563	-0.455822	5.12756	21.334	0.000296693	0.0121955	2.97322e-05	3.22384e-05	0.0765225	0.310247	0.000705905	-0.891133	-0.98128	0.017133	0.000522354		39.2865	39.2865	41.8168	30.3638	29.2984	28.0998
ENSG00000110172	CHORDC1	PC	cysteine and histidine rich domain containing 1			GO:0010824 (regulation of centrosome duplication), GO:0061077 (chaperone-mediated protein folding), GO:1900034 (regulation of cellular response to heat), GO:2000299 (negative regulation of Rho-dependent protein serine/threonine kinase activity), GO:0005575 (cellular_component), GO:0005515 (protein binding), GO:0005524 (ATP binding), GO:0008270 (zinc ion binding), GO:0043531 (ADP binding), GO:0051…		-0.506339	-0.207075	-0.270538		0.737041	0.301623	-0.0547128				234.1	75.0735	69.7363	0.709834	5.94574	21.5018	0.000285942	0.0121347	7.46234e-06	7.58281e-06	0.1	0.310247	0.13385	0.87831	0.756362	0.0213116	0.0818083		40.7514	50.6063	48.3424	99.215	72.8465	56.466
ENSG00000161542	PRPSAP1	PC	phosphoribosyl pyrophosphate synthetase associated protein 1			GO:0006139 (nucleobase-containing compound metabolic process), GO:0009165 (nucleotide biosynthetic process), GO:0043086 (negative regulation of catalytic activity), GO:0000287 (magnesium ion binding), GO:0004749 (ribose phosphate diphosphokinase activity), GO:0004857 (enzyme inhibitor activity), GO:0005515 (protein binding), GO:0042802 (identical protein binding)		-0.0973294	-0.248192	-0.199057		0.320765	0.160574	0.0632391				233.981	83.8838	32.7021	0.37298	6.63957	21.4861	0.000286929	0.0121347	2.43592e-05	2.48859e-05	0.1	0.310247	0.034301	0.87831	0.888538	0.0213116	0.0179434		91.8904	82.5682	85.4981	123.453	110.269	102.944
ENSG00000219507	FTH1P8	processed_pseudogene	ferritin heavy chain 1 pseudogene 8					0.339521	0.343293	0.316682		-0.660411	0.0658872	-0.404972				233.916	65.926	4.06399	-0.667289	5.3186	21.4775	0.000287473	0.0121347	9.305e-06	9.95423e-06	0.1	0.310247	0.0670358	-0.87831	-0.876655	0.0213116	0.0218828		48.8751	49.0082	48.076	23.4387	40.0855	28.3662
ENSG00000127586	CHTF18	PC	chromosome transmission fidelity factor 18		CHTF18, CHTF8 (MIM 613202), and DCC1 (DSCC1; MIM 613203) are components of an alternative replication factor C (RFC) (see MIM 600404) complex that loads PCNA (MIM 176740) onto DNA during S phase of the cell cycle (Merkle et al., 2003 [PubMed 12766176]; Bermudez et al., 2003 [PubMed 12930902]).[supplied by OMIM, Dec 2009].	GO:0006260 (DNA replication), GO:0007049 (cell cycle), GO:1900264 (positive regulation of DNA-directed DNA polymerase activity), GO:0005654 (nucleoplasm), GO:0005829 (cytosol), GO:0016020 (membrane), GO:0031390 (Ctf18 RFC-like complex), GO:0003689 (DNA clamp loader activity), GO:0005515 (protein binding), GO:0005524 (ATP binding), GO:0043142 (single-stranded DNA-dependent ATPase activity)		0.0941919	0.22671	0.175911		-0.280048	-0.0561783	-0.160587				233.549	88.0944	58.4955	-0.334265	7.06819	21.429	0.000290551	0.0121955	2.91056e-05	2.96605e-05	0.1	0.310247	0.0120395	-0.87831	-0.91693	0.0213116	0.0100643		141.964	155.814	150.354	109.07	127.714	118.659
ENSG00000175221	MED16	PC	mediator complex subunit 16			hsa04919 (Thyroid hormone signaling pathway), GO:0006357 (regulation of transcription from RNA polymerase II promoter), GO:0006366 (transcription from RNA polymerase II promoter), GO:0006367 (transcription initiation from RNA polymerase II promoter), GO:0030518 (intracellular steroid hormone receptor signaling pathway), GO:0030521 (androgen receptor signaling pathway), GO:0045893 (positive regula…		0.0852634	0.310377	0.217542		-0.361963	-0.0924398	-0.15878				233.11	79.0939	64.1591	-0.418191	6.22966	21.3711	0.000294282	0.0121955	2.01812e-05	2.06595e-05	0.1	0.310247	0.0160162	-0.87831	-0.895503	0.0213116	0.0158088		78.4398	92.0236	86.1639	56.9987	69.1176	65.9214
ENSG00000146281	PM20D2	PC	peptidase M20 domain containing 2			GO:0006508 (proteolysis), GO:0032268 (regulation of cellular protein metabolic process), GO:0005654 (nucleoplasm), GO:0070062 (extracellular vesicular exosome), GO:0016805 (dipeptidase activity)		-0.320298	-0.314905	-0.325711		0.74566	0.25197	-0.0367153				232.93	68.2431	97.7691	0.708943	5.47509	21.3473	0.00029583	0.0121955	9.28939e-06	9.88298e-06	0.1	0.310247	0.146897	0.87831	0.756323	0.0213116	0.0818332		33.56	33.6932	33.4268	72.447	50.8727	41.2841
ENSG00000117242	PINK1-AS	antisense	PINK1 antisense RNA					0.226481	0.342864	0.273022		-0.63275	-0.141998	-0.0676193				232.835	73.0157	97.1206	-0.561518	5.7872	21.3348	0.000296644	0.0121955	1.08883e-05	1.11027e-05	0.1	0.310247	0.0485651	-0.87831	-0.884606	0.0213116	0.0192055		62.9916	68.4517	65.1224	33.8263	48.3424	51.0059
ENSG00000070413	DGCR2	PC	DiGeorge syndrome critical region gene 2		Deletions of the 22q11.2 have been associated with a wide range of developmental defects (notably DiGeorge syndrome, velocardiofacial syndrome, conotruncal anomaly face syndrome and isolated conotruncal cardiac defects) classified under the acronym CATCH 22. The DGCR2 gene encodes a novel putative adhesion receptor protein, which could play a role in neural crest cells migration, a process which …	GO:0007155 (cell adhesion), GO:0009887 (organ morphogenesis), GO:0050890 (cognition), GO:0016021 (integral component of membrane), GO:0030246 (carbohydrate binding)		0.113264	0.198354	0.207259		-0.142673	-0.239177	-0.137026				232.829	78.7999	90.9382	-0.355194	6.206	21.334	0.000296696	0.0121955	2.92919e-05	3.01591e-05	0.1	0.310247	0.00155728	-0.87831	-0.968855	0.0213116	0.0014399		79.1057	84.0331	84.5658	65.9214	61.5266	66.1878
ENSG00000074201	CLNS1A	PC	chloride nucleotide-sensitive channel 1A		This gene encodes a protein that functions in multiple regulatory pathways. The encoded protein complexes with numerous cytosolic proteins and performs diverse functions including regulation of small nuclear ribonucleoprotein biosynthesis, platelet activation and cytoskeletal organization. The protein is also found associated with the plasma membrane where it functions as a chloride current regul…	hsa03013 (RNA transport), GO:0000387 (spliceosomal snRNP assembly), GO:0006821 (chloride transport), GO:0006884 (cell volume homeostasis), GO:0005634 (nucleus), GO:0005654 (nucleoplasm), GO:0005829 (cytosol), GO:0005856 (cytoskeleton), GO:0005886 (plasma membrane), GO:0034709 (methylosome), GO:0034715 (pICln-Sm protein complex), GO:0003723 (RNA binding), GO:0005515 (protein binding), GO:0046982 (…		-0.149651	-0.0967738	-0.117693		0.136062	0.0996722	0.128383				232.715	95.0977	17.3195	0.244301	8.21011	21.319	0.000297682	0.0121955	7.73133e-05	7.82954e-05	0.1	0.310247	0.000227077	0.87831	0.98857	0.0213116	0.000195217		265.55	275.538	271.543	324.147	316.023	322.416
ENSG00000163956	LRPAP1	PC	LDL receptor related protein associated protein 1		This gene encodes a protein that interacts with the low density lipoprotein (LDL) receptor-related protein and facilitates its proper folding and localization by preventing the binding of ligands. Mutations in this gene have been identified in individuals with myopia 23. Alternative splicing results in multiple transcript variants. [provided by RefSeq, Dec 2013].	hsa04979 (Cholesterol metabolism), GO:0010916 (negative regulation of very-low-density lipoprotein particle clearance), GO:0032091 (negative regulation of protein binding), GO:0048259 (regulation of receptor-mediated endocytosis), GO:1900116 (extracellular negative regulation of signal transduction), GO:1900222 (negative regulation of beta-amyloid clearance), GO:0005576 (extracellular region), GO…		0.202109	0.208777	0.129894		-0.399656	-0.106893	-0.034231				232.694	95.6424	88.0242	-0.354678	8.35113	21.3161	0.000297867	0.0121955	3.47568e-05	3.51221e-05	0.1	0.310247	0.0557521	-0.87831	-0.871405	0.0213116	0.0237417		371.69	373.421	353.445	244.242	299.643	315.224
ENSG00000143162	CREG1	PC	cellular repressor of E1A stimulated genes 1		The adenovirus E1A protein both activates and represses gene expression to promote cellular proliferation and inhibit differentiation. The protein encoded by this gene antagonizes transcriptional activation and cellular transformation by E1A. This protein shares limited sequence similarity with E1A and binds both the general transcription factor TBP and the tumor suppressor pRb in vitro. This gen…	GO:0006357 (regulation of transcription from RNA polymerase II promoter), GO:0007275 (multicellular organismal development), GO:0008283 (cell proliferation), GO:0040008 (regulation of growth), GO:0043312 (neutrophil degranulation), GO:0055114 (oxidation-reduction process), GO:1903507 (negative regulation of nucleic acid-templated transcription), GO:0005576 (extracellular region), GO:0005615 (extr…		-0.196366	-0.321415	-0.20682		0.39722	0.315573	0.0118076				232.632	66.756	47.393	0.515497	5.36829	21.308	0.000298402	0.0121955	1.96062e-05	2.09762e-05	0.1	0.310247	0.0589339	0.87831	0.87272	0.0213116	0.0232692		34.8917	31.8287	34.6254	53.6693	50.6063	40.6182
ENSG00000114416	FXR1	PC	FMR1 autosomal homolog 1		The protein encoded by this gene is an RNA binding protein that interacts with the functionally-similar proteins FMR1 and FXR2. These proteins shuttle between the nucleus and cytoplasm and associate with polyribosomes, predominantly with the 60S ribosomal subunit. Three transcript variants encoding different isoforms have been found for this gene. [provided by RefSeq, Jul 2008].	hsa03013 (RNA transport), GO:0006915 (apoptotic process), GO:0007517 (muscle organ development), GO:0017148 (negative regulation of translation), GO:0030154 (cell differentiation), GO:2000637 (positive regulation of gene silencing by miRNA), GO:0005730 (nucleolus), GO:0005737 (cytoplasm), GO:0005829 (cytosol), GO:0005844 (polysome), GO:0016020 (membrane), GO:0030424 (axon), GO:0035770 (ribonucleo…		-0.348944	-0.125746	-0.233033		0.279389	0.36947	0.0588651				232.452	66.9376	55.1319	0.497996	5.37679	21.2842	0.000299971	0.0122164	2.03638e-05	2.18006e-05	0.1	0.310247	0.0284349	0.87831	0.894035	0.0213116	0.016248		31.4292	37.0225	34.2259	49.6741	53.0035	42.3495
ENSG00000153560	UBP1	PC	upstream binding protein 1			GO:0001525 (angiogenesis), GO:0006351 (transcription, DNA-templated), GO:0006357 (regulation of transcription from RNA polymerase II promoter), GO:0019079 (viral genome replication), GO:0045892 (negative regulation of transcription, DNA-templated), GO:0005634 (nucleus), GO:0005654 (nucleoplasm), GO:0005829 (cytosol), GO:0003677 (DNA binding), GO:0003700 (sequence-specific DNA binding transcriptio…		-0.306354	-0.144095	-0.272409		0.409805	0.183937	0.129116				231.451	61.7586	66.9088	0.515013	5.06293	21.1524	0.000308851	0.0125339	2.52418e-05	2.73191e-05	0.1	0.310247	0.0290467	0.87831	0.908295	0.0213116	0.0122291		25.969	29.2984	26.6349	43.9476	37.2889	35.824
ENSG00000156875	MFSD14A	PC	major facilitator superfamily domain containing 14A			GO:0055085 (transmembrane transport), GO:0016021 (integral component of membrane), GO:0005215 (transporter activity)		-0.220238	-0.46681	-0.372201		0.520695	0.364601	0.173952				231.268	29.604	59.6368	0.870124	3.24789	21.1283	0.000310506	0.012557	2.00956e-05	2.4033e-05	0.1	0.310247	0.0173532	0.87831	0.932086	0.0213116	0.00676193		7.3246	5.85968	6.39238	13.5838	11.9857	10.2544
ENSG00000101911	PRPS2	PC	phosphoribosyl pyrophosphate synthetase 2		This gene encodes a phosphoribosyl pyrophosphate synthetase that plays a central role in the synthesis of purines and pyrimidines. The encoded protein catalyzes the synthesis of 5-phosphoribosyl 1-pyrophosphate from ATP and D-ribose 5-phosphate. Alternate splicing results in multiple transcript variants. [provided by RefSeq, Mar 2010].	hsa00030 (Pentose phosphate pathway), hsa00230 (Purine metabolism), hsa01100 (Metabolic pathways), hsa01200 (Carbon metabolism), hsa01230 (Biosynthesis of amino acids), GO:0006015 (5-phosphoribose 1-diphosphate biosynthetic process), GO:0006139 (nucleobase-containing compound metabolic process), GO:0006167 (AMP biosynthetic process), GO:0009116 (nucleoside metabolic process), GO:0016310 (phosphor…		-0.308973	-0.231238	-0.184699		0.490477	0.159932	0.0745007				231.082	69.2893	37.6827	0.51522	5.55014	21.1038	0.000312194	0.0125813	2.01352e-05	2.13965e-05	0.1	0.310247	0.080611	0.87831	0.842892	0.0213116	0.0350853		36.4898	38.6206	39.9524	64.9892	51.2722	48.2092
ENSG00000120802	TMPO	PC	thymopoietin		The protein encoded by this gene resides in the nucleus and may play a role in the assembly of the nuclear lamina, and thus help maintain the structural organization of the nuclear envelope. It may function as a receptor for the attachment of lamin filaments to the inner nuclear membrane. Mutations in this gene are associated with dilated cardiomyopathy. Alternatively spliced transcript variants …	GO:0006355 (regulation of transcription, DNA-templated), GO:0000785 (chromatin), GO:0005634 (nucleus), GO:0005635 (nuclear envelope), GO:0003677 (DNA binding), GO:0005521 (lamin binding), GO:0045296 (cadherin binding), R-HSA-1640170 (Homo sapiens: Cell Cycle), R-HSA-2555396 (Homo sapiens: Mitotic Metaphase and Anaphase), R-HSA-2980766 (Homo sapiens: Nuclear Envelope Breakdown), R-HSA-2993913 (Hom…		-0.203582	-0.246821	-0.195088		0.424264	0.23608	-0.0148534				230.849	79.6559	51.3878	0.452791	6.2742	21.0732	0.000314327	0.0125983	2.13476e-05	2.17994e-05	0.1	0.310247	0.0925685	0.87831	0.833491	0.0213116	0.0392795		65.6551	63.6574	66.0546	102.544	89.7596	75.1104
ENSG00000129968	ABHD17A	PC	abhydrolase domain containing 17A			hsa00062 (Fatty acid elongation), GO:0008150 (biological_process), GO:0005576 (extracellular region), GO:0016020 (membrane), GO:0005515 (protein binding), GO:0016787 (hydrolase activity)		0.0216443	0.543829	0.373916		-0.488492	-0.175372	-0.275525				230.699	53.346	84.5396	-0.692217	4.56847	21.0535	0.000315707	0.0125983	1.8306e-05	2.0107e-05	0.1	0.310247	0.059047	-0.87831	-0.849928	0.0213116	0.0320923		23.0392	33.9595	29.9643	15.5814	19.843	18.3781
ENSG00000100714	MTHFD1	PC	methylenetetrahydrofolate dehydrogenase, cyclohydrolase and formyltetrahydrofolate synthetase 1		This gene encodes a protein that possesses three distinct enzymatic activities, 5,10-methylenetetrahydrofolate dehydrogenase, 5,10-methenyltetrahydrofolate cyclohydrolase and 10-formyltetrahydrofolate synthetase. Each of these activities catalyzes one of three sequential reactions in the interconversion of 1-carbon derivatives of tetrahydrofolate, which are substrates for methionine, thymidylate,…	hsa00670 (One carbon pool by folate), hsa01100 (Metabolic pathways), GO:0000105 (histidine biosynthetic process), GO:0001780 (neutrophil homeostasis), GO:0001843 (neural tube closure), GO:0006164 (purine nucleotide biosynthetic process), GO:0006555 (methionine metabolic process), GO:0006730 (one-carbon metabolic process), GO:0007507 (heart development), GO:0009069 (serine family amino acid metabo…		-0.102572	-0.152666	-0.144993		0.151452	0.190643	0.0581357				230.68	93.0054	41.5651	0.270131	7.79038	21.051	0.000315883	0.0125983	6.25123e-05	6.3453e-05	0.1	0.310247	0.0165901	0.87831	0.9479	0.0213116	0.00400084		204.822	197.764	198.83	244.642	251.434	229.193
ENSG00000138385	SSB	PC	Sjogren syndrome antigen B		The protein encoded by this gene is involved in diverse aspects of RNA metabolism, including binding and protecting poly(U) termini of nascent RNA polymerase III transcripts from exonuclease digestion, processing 5_ and 3_ ends of pre-tRNA precursors, acting as an RNA chaperone, and binding viral RNAs associated with hepatitis C virus. Autoantibodies reacting with this protein are found in the se…	hsa05322 (Systemic lupus erythematosus), GO:0001682 (tRNA 5'-leader removal), GO:0006400 (tRNA modification), GO:0006409 (tRNA export from nucleus), GO:0008033 (tRNA processing), GO:0008334 (histone mRNA metabolic process), GO:0042780 (tRNA 3'-end processing), GO:0071045 (nuclear histone mRNA catabolic process), GO:0075522 (IRES-dependent viral translational initiation), GO:1903608 (NA), GO:00007…		-0.0469757	-0.177686	-0.194115		0.183518	0.125949	0.109309				230.529	92.746	18.1323	0.280637	7.72952	21.0312	0.000317277	0.0126104	5.60285e-05	5.68779e-05	0.1	0.310247	0.00929734	0.87831	0.941987	0.0213116	0.00495057		204.023	186.178	184.047	239.714	230.259	227.595
ENSG00000221968	FADS3	PC	fatty acid desaturase 3		The protein encoded by this gene is a member of the fatty acid desaturase (FADS) gene family. Desaturase enzymes regulate unsaturation of fatty acids through the introduction of double bonds between defined carbons of the fatty acyl chain. FADS family members are considered fusion products composed of an N-terminal cytochrome b5-like domain and a C-terminal multiple membrane-spanning desaturase p…	GO:0006636 (unsaturated fatty acid biosynthetic process), GO:0055114 (oxidation-reduction process), GO:0005789 (endoplasmic reticulum membrane), GO:0016020 (membrane), GO:0016021 (integral component of membrane), GO:0003674 (molecular_function), GO:0016491 (oxidoreductase activity)		0.0803567	0.176836	0.135444		-0.227599	-0.0726058	-0.0924318				230.344	96.7404	48.5776	-0.261908	8.71771	21.0068	0.000319001	0.0126239	9.49128e-05	9.57955e-05	0.1	0.310247	0.0107358	-0.87831	-0.925654	0.0213116	0.00808549		442.805	473.569	460.118	357.307	398.059	392.599
ENSG00000280211	AC106886.4	TEC						0.219501	0.299536	0.294949		-0.532003	-0.224849	-0.0571345				230.258	61.4906	83.7873	-0.562755	5.04849	20.9956	0.000319799	0.0126239	1.65638e-05	1.79277e-05	0.1	0.310247	0.0342468	-0.87831	-0.915906	0.0213116	0.0103102		37.6884	39.9524	39.8192	21.5743	27.1676	30.7633
ENSG00000182087	TMEM259	PC	transmembrane protein 259			GO:0034976 (response to endoplasmic reticulum stress), GO:1901215 (negative regulation of neuron death), GO:1904294 (NA), GO:0005789 (endoplasmic reticulum membrane), GO:0016021 (integral component of membrane)		-0.0475743	0.314026	0.421737		-0.21498	-0.198933	-0.274275				229.79	77.235	56.1868	-0.485949	6.10075	20.9341	0.000324211	0.0126562	1.98505e-05	2.02732e-05	0.1	0.310247	0.0954684	-0.87831	-0.82694	0.0213116	0.0423333		64.856	83.9	90.5587	57.5314	58.1973	55.1343
ENSG00000092445	TYRO3	PC	TYRO3 protein tyrosine kinase		The gene is part of a 3-member transmembrane receptor kinase receptor family with a processed pseudogene distal on chromosome 15. The encoded protein is activated by the products of the growth arrest-specific gene 6 and protein S genes and is involved in controlling cell survival and proliferation, spermatogenesis, immunoregulation and phagocytosis. The encoded protein has also been identified as…	GO:0001779 (natural killer cell differentiation), GO:0007155 (cell adhesion), GO:0007165 (signal transduction), GO:0007283 (spermatogenesis), GO:0014065 (phosphatidylinositol 3-kinase signaling), GO:0018108 (peptidyl-tyrosine phosphorylation), GO:0021885 (forebrain cell migration), GO:0023014 (signal transduction by phosphorylation), GO:0030168 (platelet activation), GO:0032940 (secretion by cell…		0.346482	0.340408	0.165924		-0.439733	-0.348596	-0.0644844				229.739	53.372	75.0886	-0.610676	4.57117	20.9274	0.000324695	0.0126562	2.18695e-05	2.41161e-05	0.1	0.310247	0.0108809	-0.87831	-0.922107	0.0213116	0.0088647		29.6979	29.5648	25.969	16.3805	17.579	21.8406
ENSG00000048828	FAM120A	PC	family with sequence similarity 120A			GO:0005634 (nucleus), GO:0005829 (cytosol), GO:0005886 (plasma membrane), GO:0016020 (membrane), GO:0003723 (RNA binding)		-0.23744	-0.218905	-0.307513		0.500724	0.0593764	0.203758				229.637	63.142	84.3147	0.550641	5.14758	20.9141	0.000325661	0.0126562	2.41624e-05	2.5993e-05	0.1	0.310247	0.078395	0.87831	0.852447	0.0213116	0.0310515		28.8989	29.2984	27.434	49.5409	35.9571	39.9524
ENSG00000143797	MBOAT2	PC	membrane bound O-acyltransferase domain containing 2			hsa00561 (Glycerolipid metabolism), hsa00564 (Glycerophospholipid metabolism), hsa01100 (Metabolic pathways), GO:0008654 (phospholipid biosynthetic process), GO:0036151 (phosphatidylcholine acyl-chain remodeling), GO:0036152 (phosphatidylethanolamine acyl-chain remodeling), GO:0005789 (endoplasmic reticulum membrane), GO:0016021 (integral component of membrane), GO:0003841 (1-acylglycerol-3-phosp…		-0.372328	-0.177221	-0.212406		0.31806	0.26148	0.182415				229.611	53.3201	50.6355	0.550454	4.56577	20.9106	0.000325912	0.0126562	3.06904e-05	3.39448e-05	0.1	0.310247	0.00172158	0.87831	0.966145	0.0213116	0.00169988		17.3127	20.1094	19.5767	29.1652	27.9667	26.3686
ENSG00000170558	CDH2	PC	cadherin 2		This gene is a classical cadherin from the cadherin superfamily. The encoded protein is a calcium dependent cell-cell adhesion glycoprotein comprised of five extracellular cadherin repeats, a transmembrane region and a highly conserved cytoplasmic tail. The protein functions during gastrulation and is required for establishment of left-right asymmetry. At certain central nervous system synapses, …	hsa04514 (Cell adhesion molecules (CAMs)), hsa05412 (Arrhythmogenic right ventricular cardiomyopathy (ARVC)), GO:0007155 (cell adhesion), GO:0007156 (homophilic cell adhesion via plasma membrane adhesion molecules), GO:0007157 (heterophilic cell-cell adhesion via plasma membrane cell adhesion molecules), GO:0010001 (glial cell differentiation), GO:0016339 (calcium-dependent cell-cell adhesion via…		-0.428796	-0.334683	-0.246335		0.764274	0.255287	-0.00974801				229.593	60.4531	73.1258	0.75457	4.98115	20.9082	0.000326088	0.0126562	1.29041e-05	1.39294e-05	0.1	0.310247	0.136581	0.87831	0.764355	0.0213116	0.07675		21.7075	23.3055	24.9036	52.2044	36.0903	29.6979
ENSG00000155508	CNOT8	PC	CCR4-NOT transcription complex subunit 8			hsa03018 (RNA degradation), GO:0000289 (nuclear-transcribed mRNA poly(A) tail shortening), GO:0006351 (transcription, DNA-templated), GO:0006355 (regulation of transcription, DNA-templated), GO:0006977 (DNA damage response, signal transduction by p53 class mediator resulting in cell cycle arrest), GO:0008284 (positive regulation of cell proliferation), GO:0008285 (negative regulation of cell prol…		-0.300239	-0.29147	-0.223171		0.397431	0.402844	0.0146036				229.06	55.2914	22.8534	0.598176	4.68758	20.8384	0.000331217	0.0128122	2.75851e-05	3.01961e-05	0.1	0.310247	0.0615215	0.87831	0.88104	0.0213116	0.0203855		19.843	19.9762	21.0416	33.4268	33.56	25.17
ENSG00000121057	AKAP1	PC	A-kinase anchoring protein 1		The A-kinase anchor proteins (AKAPs) are a group of structurally diverse proteins, which have the common function of binding to the regulatory subunit of protein kinase A (PKA) and confining the holoenzyme to discrete locations within the cell. This gene encodes a member of the AKAP family. The encoded protein binds to type I and type II regulatory subunits of PKA and anchors them to the mitochon…	GO:0007596 (blood coagulation), GO:0010738 (regulation of protein kinase A signaling), GO:0005739 (mitochondrion), GO:0005741 (mitochondrial outer membrane), GO:0005829 (cytosol), GO:0016020 (membrane), GO:0016021 (integral component of membrane), GO:0003723 (RNA binding), GO:0005515 (protein binding), GO:0034237 (protein kinase A regulatory subunit binding), R-HSA-109582 (Homo sapiens: Hemostasi…		-0.214767	-0.159006	-0.229051		0.374904	0.142251	0.0856693				228.933	75.1254	62.2741	0.42039	5.94885	20.8217	0.000332456	0.0128173	3.02145e-05	3.10529e-05	0.1	0.310247	0.0554586	0.87831	0.887505	0.0213116	0.0182709		52.0713	54.202	51.5386	79.372	67.2531	64.5897
ENSG00000173933	RBM4	PC	RNA binding motif protein 4			GO:0000381 (regulation of alternative mRNA splicing, via spliceosome), GO:0002190 (cap-independent translational initiation), GO:0002192 (IRES-dependent translational initiation), GO:0006396 (RNA processing), GO:0006397 (mRNA processing), GO:0008380 (RNA splicing), GO:0017148 (negative regulation of translation), GO:0030154 (cell differentiation), GO:0032055 (negative regulation of translation in…		-0.0743723	-0.279613	-0.166644		0.306543	0.136772	0.0773143				228.359	87.4633	34.0942	0.353393	7.00528	20.7465	0.000338105	0.01294	3.52466e-05	3.59072e-05	0.1	0.310247	0.0268284	0.87831	0.879066	0.0213116	0.0210531		120.523	104.276	112.932	157.545	139.833	134.107
ENSG00000165527	ARF6	PC	ADP ribosylation factor 6		This gene encodes a member of the human ARF gene family, which is part of the RAS superfamily. The ARF genes encode small guanine nucleotide-binding proteins that stimulate the ADP-ribosyltransferase activity of cholera toxin and play a role in vesicular trafficking and as activators of phospholipase D. The product of this gene is localized to the plasma membrane, and regulates vesicular traffick…	hsa04014 (Ras signaling pathway), hsa04072 (Phospholipase D signaling pathway), hsa04144 (Endocytosis), hsa04666 (Fc gamma R-mediated phagocytosis), GO:0001889 (liver development), GO:0006928 (cellular component movement), GO:0007049 (cell cycle), GO:0007155 (cell adhesion), GO:0007264 (small GTPase mediated signal transduction), GO:0015031 (protein transport), GO:0016192 (vesicle-mediated transp…		-0.291176	-0.395751	-0.342516		0.698611	0.406865	-0.0760326				228.301	52.0923	95.4691	0.787056	4.49795	20.739	0.000338672	0.01294	1.77946e-05	1.95588e-05	0.1	0.310247	0.119271	0.87831	0.793427	0.0213116	0.0596009		17.0463	15.7146	16.3805	35.824	28.8989	20.1094
ENSG00000159069	FBXW5	PC	F-box and WD repeat domain containing 5		This gene encodes a member of the F-box protein family, members of which are characterized by an approximately 40 amino acid motif, the F-box. The F-box proteins constitute one of the four subunits of ubiquitin protein ligase complex called SCFs (SKP1-cullin-F-box), which function in phosphorylation-dependent ubiquitination. The F-box proteins are divided into three classes: Fbws containing WD-40…	GO:0000209 (protein polyubiquitination), GO:0007088 (regulation of mitosis), GO:0010824 (regulation of centrosome duplication), GO:0016567 (protein ubiquitination), GO:0031146 (SCF-dependent proteasomal ubiquitin-dependent protein catabolic process), GO:0043161 (proteasome-mediated ubiquitin-dependent protein catabolic process), GO:0005737 (cytoplasm), GO:0005829 (cytosol), GO:0019005 (SCF ubiqui…		0.0487913	0.275222	0.2221		-0.354664	-0.069229	-0.122221				228.269	90.6536	58.2793	-0.366307	7.41426	20.7348	0.000338995	0.01294	3.2945e-05	3.34395e-05	0.1	0.310247	0.0273862	-0.87831	-0.861666	0.0213116	0.027381		174.325	204.29	196.832	131.31	160.475	154.616
ENSG00000112237	CCNC	PC	cyclin C		The protein encoded by this gene is a member of the cyclin family of proteins. The encoded protein interacts with cyclin-dependent kinase 8 and induces the phophorylation of the carboxy-terminal domain of the large subunit of RNA polymerase II. The level of mRNAs for this gene peaks in the G1 phase of the cell cycle. Two transcript variants encoding different isoforms have been found for this gen…	GO:0006367 (transcription initiation from RNA polymerase II promoter), GO:0006468 (protein phosphorylation), GO:0045737 (positive regulation of cyclin-dependent protein serine/threonine kinase activity), GO:0045944 (positive regulation of transcription from RNA polymerase II promoter), GO:1901409 (positive regulation of phosphorylation of RNA polymerase II C-terminal domain), GO:0000307 (cyclin-d…		-0.381655	-0.222978	-0.253348		0.501844	0.265257	0.0908781				227.779	50.5361	37.4578	0.636907	4.40578	20.6707	0.00034391	0.013054	3.11597e-05	3.45097e-05	0.1	0.310247	0.049569	0.87831	0.88718	0.0213116	0.0183746		15.1819	17.1795	16.78	29.6979	24.9036	21.8406
ENSG00000128951	DUT	PC	deoxyuridine triphosphatase		This gene encodes an essential enzyme of nucleotide metabolism. The encoded protein forms a ubiquitous, homotetrameric enzyme that hydrolyzes dUTP to dUMP and pyrophosphate. This reaction serves two cellular purposes: providing a precursor (dUMP) for the synthesis of thymine nucleotides needed for DNA replication, and limiting intracellular pools of dUTP. Elevated levels of dUTP lead to increased…	hsa00240 (Pyrimidine metabolism), hsa00983 (Drug metabolism - other enzymes), hsa01100 (Metabolic pathways), GO:0006139 (nucleobase-containing compound metabolic process), GO:0006226 (dUMP biosynthetic process), GO:0006260 (DNA replication), GO:0046080 (dUTP metabolic process), GO:0046134 (pyrimidine nucleoside biosynthetic process), GO:0005634 (nucleus), GO:0005654 (nucleoplasm), GO:0005739 (mit…		-0.139524	-0.147003	-0.0875104		0.164688	0.142773	0.0665765				227.747	94.7346	21.297	0.251484	8.14532	20.6664	0.000344239	0.013054	9.11708e-05	9.23385e-05	0.1	0.310247	0.00593873	0.87831	0.95995	0.0213116	0.00237391		255.562	254.23	265.017	316.023	311.229	295.115
ENSG00000128699	ORMDL1	PC	ORMDL sphingolipid biosynthesis regulator 1			GO:0006672 (ceramide metabolic process), GO:0090156 (cellular sphingolipid homeostasis), GO:1900060 (negative regulation of ceramide biosynthetic process), GO:0005783 (endoplasmic reticulum), GO:0005789 (endoplasmic reticulum membrane), GO:0016021 (integral component of membrane), GO:0035339 (SPOTS complex), R-HSA-1430728 (Homo sapiens: Metabolism), R-HSA-1660661 (Homo sapiens: Sphingolipid de no…		-0.168121	-0.165811	-0.145185		0.245171	0.0875662	0.146381				227.296	82.6561	46.6061	0.327821	6.52775	20.6075	0.000348834	0.0131506	4.58783e-05	4.70934e-05	0.1	0.310247	0.0234286	0.87831	0.95124	0.0213116	0.00350832		81.1033	81.2365	82.435	108.67	97.2174	101.346
ENSG00000137492	THAP12	PC	THAP domain containing 12			GO:0006357 (regulation of transcription from RNA polymerase II promoter), GO:0006950 (response to stress), GO:0007165 (signal transduction), GO:0008285 (negative regulation of cell proliferation), GO:0005654 (nucleoplasm), GO:0005737 (cytoplasm), GO:0000981 (sequence-specific DNA binding RNA polymerase II transcription factor activity), GO:0003677 (DNA binding), GO:0005515 (protein binding), GO:0…		-0.377374	-0.326754	-0.193796		0.575403	0.274636	0.0478849				227.274	52.8186	82.594	0.667592	4.53571	20.6046	0.000349059	0.0131506	2.66165e-05	2.92388e-05	0.1	0.310247	0.0764009	0.87831	0.844597	0.0213116	0.0343485		16.6468	17.3127	19.1771	34.0927	27.3008	23.0392
ENSG00000104388	RAB2A	PC	RAB2A, member RAS oncogene family		The protein encoded by this gene belongs to the Rab family, members of which are small molecular weight guanosine triphosphatases (GTPases) that contain highly conserved domains involved in GTP binding and hydrolysis. The Rabs are membrane-bound proteins, involved in vesicular fusion and trafficking. This protein is a resident of pre-Golgi intermediates, and is required for protein transport from…	hsa04152 (AMPK signaling pathway), GO:0007030 (Golgi organization), GO:0015031 (protein transport), GO:0000139 (Golgi membrane), GO:0005634 (nucleus), GO:0005765 (lysosomal membrane), GO:0005789 (endoplasmic reticulum membrane), GO:0005794 (Golgi apparatus), GO:0005829 (cytosol), GO:0033116 (endoplasmic reticulum-Golgi intermediate compartment membrane), GO:0042470 (melanosome), GO:0070062 (extra…		-0.260468	-0.358852	-0.276406		0.381383	0.340165	0.174178				226.768	37.9301	18.8067	0.694978	3.71344	20.5386	0.000354293	0.0132633	3.92609e-05	4.53267e-05	0.1	0.310247	0.0100043	0.87831	0.966396	0.0213116	0.00167491		10.1213	9.32222	9.98809	16.9132	16.3805	14.3829
ENSG00000176978	DPP7	PC	dipeptidyl peptidase 7		The protein encoded by this gene is a post-proline cleaving aminopeptidase expressed in quiescent lymphocytes. The resting lymphocytes are maintained through suppression of apoptosis, a state which is disrupted by inhibition of this novel serine protease. The enzyme has strong sequence homology with prolylcarboxypeptidase and is active at both acidic and neutral pH. [provided by RefSeq, Jul 2008]…	GO:0006508 (proteolysis), GO:0043312 (neutrophil degranulation), GO:0005576 (extracellular region), GO:0005794 (Golgi apparatus), GO:0005829 (cytosol), GO:0031982 (vesicle), GO:0035578 (azurophil granule lumen), GO:0043231 (intracellular membrane-bounded organelle), GO:0070062 (extracellular vesicular exosome), GO:0008236 (serine-type peptidase activity), GO:0008239 (dipeptidyl-peptidase activity…		0.311311	0.359852	0.214913		-0.498715	-0.387697	0.000336108				226.763	56.6661	15.0454	-0.619286	4.76735	20.5379	0.000354347	0.0132633	2.05234e-05	2.23971e-05	0.1	0.310247	0.0320399	-0.87831	-0.902354	0.0213116	0.0138365		33.0273	34.2259	30.7633	17.9786	19.5767	26.2354
ENSG00000164880	INTS1	PC	integrator complex subunit 1		INTS1 is a subunit of the Integrator complex, which associates with the C-terminal domain of RNA polymerase II large subunit (POLR2A; MIM 180660) and mediates 3-prime end processing of small nuclear RNAs U1 (RNU1; MIM 180680) and U2 (RNU2; MIM 180690) (Baillat et al., 2005 [PubMed 16239144]).[supplied by OMIM, Mar 2008].	GO:0016180 (snRNA processing), GO:0034474 (U2 snRNA 3'-end processing), GO:0042795 (snRNA transcription from RNA polymerase II promoter), GO:0005654 (nucleoplasm), GO:0016020 (membrane), GO:0016021 (integral component of membrane), GO:0031965 (nuclear membrane), GO:0032039 (integrator complex), R-HSA-6807505 (Homo sapiens: RNA polymerase II transcribes snRNA genes), R-HSA-74160 (Homo sapiens: Gen…		0.146227	0.184925	0.149634		-0.258604	-0.0764442	-0.145738				226.529	84.074	60.0951	-0.325028	6.6549	20.5074	0.000356794	0.013287	4.39398e-05	4.50284e-05	0.1	0.310247	0.0151196	-0.87831	-0.955732	0.0213116	0.00289613		110.668	113.731	110.934	83.1009	94.5539	90.026
ENSG00000171206	TRIM8	PC	tripartite motif containing 8		The protein encoded by this gene is a member of the tripartite motif (TRIM) family. The TRIM motif includes three zinc-binding domains, a RING, a B-box type 1 and a B-box type 2, and a coiled-coil region. This protein localizes to nuclear bodies. Its structure is similar to some tumor suppressor proteins and its gene maps to a locus thought to contain tumor suppressor genes. [provided by RefSeq, …	GO:0010508 (positive regulation of autophagy), GO:0016567 (protein ubiquitination), GO:0019827 (stem cell maintenance), GO:0032897 (negative regulation of viral transcription), GO:0043123 (positive regulation of I-kappaB kinase/NF-kappaB signaling), GO:0045087 (innate immune response), GO:0046597 (negative regulation of viral entry into host cell), GO:0051091 (positive regulation of sequence-spec…		-0.116799	-0.214093	-0.207816		0.356809	0.0875552	0.0943442				226.484	84.6274	40.0432	0.370927	6.72287	20.5014	0.000357277	0.013287	3.71906e-05	3.79649e-05	0.1	0.310247	0.0630259	0.87831	0.862309	0.0213116	0.027133		96.0189	89.6265	90.026	134.107	110.934	111.467
ENSG00000162961	DPY30	PC	dpy-30, histone methyltransferase complex regulatory subunit		DPY30 is a component of a Set1-like multiprotein histone methyltransferase complex (Cho et al., 2007 [PubMed 17500065]).[supplied by OMIM, May 2008]. Publication Note: This RefSeq record includes a subset of the publications that are available for this gene. Please see the Gene record to access additional publications.	GO:0006348 (chromatin silencing at telomere), GO:0006351 (transcription, DNA-templated), GO:0016197 (endosomal transport), GO:0051568 (histone H3-K4 methylation), GO:0000781 (chromosome, telomeric region), GO:0005634 (nucleus), GO:0005654 (nucleoplasm), GO:0005794 (Golgi apparatus), GO:0005802 (trans-Golgi network), GO:0035097 (histone methyltransferase complex), GO:0044666 (MLL3/4 complex), GO:0…		-0.166733	-0.215275	-0.130075		0.221527	0.229609	0.0609472				225.863	80.2611	10.722	0.35162	6.32621	20.4205	0.00036388	0.0134892	4.25214e-05	4.36982e-05	0.1	0.310247	0.0199598	0.87831	0.936336	0.0213116	0.0059507		70.4493	68.0522	72.3138	92.8227	93.3554	82.8346
ENSG00000162909	CAPN2	PC	calpain 2		The calpains, calcium-activated neutral proteases, are nonlysosomal, intracellular cysteine proteases. The mammalian calpains include ubiquitous, stomach-specific, and muscle-specific proteins. The ubiquitous enzymes consist of heterodimers with distinct large, catalytic subunits associated with a common small, regulatory subunit. This gene encodes the large subunit of the ubiquitous enzyme, calp…	hsa04141 (Protein processing in endoplasmic reticulum), hsa04210 (Apoptosis), hsa04217 (Necroptosis), hsa04218 (Cellular senescence), hsa04510 (Focal adhesion), hsa05010 (Alzheimer disease), GO:0001666 (response to hypoxia), GO:0001824 (blastocyst development), GO:0006508 (proteolysis), GO:0007520 (myoblast fusion), GO:0016540 (protein autoprocessing), GO:0022617 (extracellular matrix disassembly…		-0.0660514	-0.144356	-0.149538		0.157894	0.0876917	0.11436				225.73	96.2476	64.8854	0.241041	8.52784	20.4031	0.000365311	0.013499	0.000125881	0.000127204	0.1	0.310247	0.00212835	0.87831	0.963064	0.0213116	0.00202122		350.915	332.271	331.072	410.178	390.601	397.926
ENSG00000068697	LAPTM4A	PC	lysosomal protein transmembrane 4 alpha		This gene encodes a protein that has four predicted transmembrane domains. The function of this gene has not yet been determined; however, studies in the mouse homolog suggest a role in the transport of small molecules across endosomal and lysosomal membranes. [provided by RefSeq, Jul 2008].	hsa04142 (Lysosome), GO:0006810 (transport), GO:0005794 (Golgi apparatus), GO:0016021 (integral component of membrane)		-0.0781388	-0.218186	-0.159479		0.247313	0.209631	-0.00114083				225.485	94.8729	31.7423	0.308929	8.16809	20.3713	0.00036796	0.0135536	6.62232e-05	6.6981e-05	0.1	0.310247	0.0499969	0.87831	0.859415	0.0213116	0.0282571		270.078	244.908	255.162	338.929	330.14	284.994
ENSG00000125826	RBCK1	PC	RANBP2-type and C3HC4-type zinc finger containing 1		The protein encoded by this gene is similar to mouse UIP28/UbcM4 interacting protein. Alternative splicing has been observed at this locus, resulting in distinct isoforms. [provided by RefSeq, Jul 2008].	hsa04217 (Necroptosis), hsa04621 (NOD-like receptor signaling pathway), GO:0000209 (protein polyubiquitination), GO:0007249 (I-kappaB kinase/NF-kappaB signaling), GO:0010803 (regulation of tumor necrosis factor-mediated signaling pathway), GO:0016032 (viral process), GO:0032088 (negative regulation of NF-kappaB transcription factor activity), GO:0042346 (positive regulation of NF-kappaB import in…		0.252494	0.0915789	0.26278		-0.350625	-0.0928386	-0.163389				224.91	75.0476	55.7285	-0.415838	5.94262	20.2963	0.000374274	0.0137154	3.31473e-05	3.40867e-05	0.1	0.310247	0.0112254	-0.87831	-0.912435	0.0213116	0.0111658		72.447	64.5897	72.9797	47.0106	56.5992	53.8025
ENSG00000142856	ITGB3BP	PC	integrin subunit beta 3 binding protein		This gene encodes a transcriptional coregulator that binds to and enhances the activity of members of the nuclear receptor families, thyroid hormone receptors and retinoid X receptors. This protein also acts as a corepressor of NF-kappaB-dependent signaling. This protein induces apoptosis in breast cancer cells through a caspase 2-mediated signaling pathway. This protein is also a component of th…	GO:0006351 (transcription, DNA-templated), GO:0006355 (regulation of transcription, DNA-templated), GO:0006915 (apoptotic process), GO:0007062 (sister chromatid cohesion), GO:0007067 (mitotic nuclear division), GO:0007155 (cell adhesion), GO:0007165 (signal transduction), GO:0034080 (CENP-A containing nucleosome assembly), GO:0043065 (positive regulation of apoptotic process), GO:0051301 (cell di…		-0.316874	-0.203357	-0.172498		0.207742	0.236769	0.248218				224.869	56.5191	16.0138	0.495381	4.75554	20.291	0.000374724	0.0137154	4.4856e-05	4.92109e-05	0.1	0.310247	0.00268568	0.87831	0.985702	0.0213116	0.000305177		20.7752	22.6397	23.1724	30.7633	31.4292	31.6955
ENSG00000067829	IDH3G	PC	isocitrate dehydrogenase 3 (NAD(+)) gamma		Isocitrate dehydrogenases catalyze the oxidative decarboxylation of isocitrate to 2-oxoglutarate. These enzymes belong to two distinct subclasses, one of which utilizes NAD(+) as the electron acceptor and the other NADP(+). Five isocitrate dehydrogenases have been reported: three NAD(+)-dependent isocitrate dehydrogenases, which localize to the mitochondrial matrix, and two NADP(+)-dependent isoc…	hsa00020 (Citrate cycle (TCA cycle)), hsa01100 (Metabolic pathways), hsa01200 (Carbon metabolism), hsa01210 (2-Oxocarboxylic acid metabolism), hsa01230 (Biosynthesis of amino acids), GO:0005975 (carbohydrate metabolic process), GO:0006099 (tricarboxylic acid cycle), GO:0006102 (isocitrate metabolic process), GO:0005654 (nucleoplasm), GO:0005730 (nucleolus), GO:0005739 (mitochondrion), GO:0005759 …		0.15569	0.291218	0.0840985		-0.169844	-0.200345	-0.160818				224.741	77.7883	28.3096	-0.366652	6.13942	20.2744	0.000376146	0.013724	4.4123e-05	4.54243e-05	0.1	0.310247	0.0332044	-0.87831	-0.930766	0.0213116	0.00702403		77.7739	85.6312	73.9119	61.6598	60.3281	62.0593
ENSG00000033100	CHPF2	PC	chondroitin polymerizing factor 2			hsa00532 (Glycosaminoglycan biosynthesis - chondroitin sulfate / dermatan sulfate), hsa01100 (Metabolic pathways), GO:0030206 (chondroitin sulfate biosynthetic process), GO:0000139 (Golgi membrane), GO:0016020 (membrane), GO:0016021 (integral component of membrane), GO:0032580 (Golgi cisterna membrane), GO:0008376 (acetylgalactosaminyltransferase activity), GO:0050510 (N-acetylgalactosaminyl-prot…		0.129935	0.219788	0.209125		-0.265624	-0.0276013	-0.265624				224.629	79.4397	73.2815	-0.378354	6.2609	20.0492	0.00039598	0.014022	3.95492e-05	4.05955e-05	0.0765225	0.310247	0.021674	-0.891133	-0.92059	0.017133	0.00920844		82.9677	88.4279	87.762	62.592	74.1782	62.592
ENSG00000090060	PAPOLA	PC	poly(A) polymerase alpha		The protein encoded by this gene belongs to the poly(A) polymerase family. It is required for the addition of adenosine residues for the creation of the 3_-poly(A) tail of mRNAs. Alternatively spliced transcript variants encoding different isoforms have been found for this gene. [provided by RefSeq, Oct 2011].	hsa03015 (mRNA surveillance pathway), GO:0000398 (mRNA splicing, via spliceosome), GO:0006369 (termination of RNA polymerase II transcription), GO:0006378 (mRNA polyadenylation), GO:0031124 (mRNA 3'-end processing), GO:0031440 (regulation of mRNA 3'-end processing), GO:0043631 (RNA polyadenylation), GO:0005634 (nucleus), GO:0005654 (nucleoplasm), GO:0005737 (cytoplasm), GO:0000287 (magnesium ion …		-0.3982	-0.152929	-0.102144		0.217953	0.188585	0.246734				224.558	68.1826	39.9654	0.449692	5.47005	20.2506	0.000378185	0.0137479	3.21599e-05	3.43482e-05	0.1	0.310247	0.0241412	0.87831	0.939277	0.0213116	0.00541893		32.4946	38.887	40.3519	50.8727	49.8073	51.9381
ENSG00000272333	KMT2B	PC	lysine methyltransferase 2B		This gene encodes a protein which contains multiple domains including a CXXC zinc finger, three PHD zinc fingers, two FY-rich domains, and a SET (suppressor of variegation, enhancer of zeste, and trithorax) domain. The SET domain is a conserved C-terminal domain that characterizes proteins of the MLL (mixed-lineage leukemia) family. This gene is ubiquitously expressed in adult tissues. It is also…	hsa00310 (Lysine degradation), GO:0001541 (ovarian follicle development), GO:0006351 (transcription, DNA-templated), GO:0007613 (memory), GO:0009994 (oocyte differentiation), GO:0016458 (gene silencing), GO:0030728 (ovulation), GO:0048096 (chromatin-mediated maintenance of transcription), GO:0051568 (histone H3-K4 methylation), GO:0051569 (regulation of histone H3-K4 methylation), GO:0080182 (his…		0.157196	0.32592	0.202998		-0.431319	-0.0838006	-0.170994				224.454	69.419	85.5166	-0.471216	5.559	20.2371	0.000379352	0.0137479	2.80414e-05	2.98192e-05	0.1	0.310247	0.0162194	-0.87831	-0.907203	0.0213116	0.0125173		51.6717	58.3305	53.403	33.6932	43.4149	40.7514
ENSG00000153015	CWC27	PC	CWC27 spliceosome associated protein homolog			GO:0000398 (mRNA splicing, via spliceosome), GO:0000413 (protein peptidyl-prolyl isomerization), GO:0006457 (protein folding), GO:0005654 (nucleoplasm), GO:0071013 (catalytic step 2 spliceosome), GO:0003755 (peptidyl-prolyl cis-trans isomerase activity), R-HSA-72163 (Homo sapiens: mRNA Splicing - Major Pathway), R-HSA-72172 (Homo sapiens: mRNA Splicing), R-HSA-72203 (Homo sapiens: Processing of C…		-0.152823	-0.216122	-0.250793		0.264928	0.339335	0.015475				224.364	73.7939	42.7237	0.433803	5.84961	20.2253	0.000380368	0.0137479	3.62054e-05	3.72299e-05	0.1	0.310247	0.0558113	0.87831	0.881251	0.0213116	0.0203147		50.7395	48.4755	47.277	68.4517	72.1806	57.2651
ENSG00000127184	COX7C	PC	cytochrome c oxidase subunit 7C		Cytochrome c oxidase (COX), the terminal component of the mitochondrial respiratory chain, catalyzes the electron transfer from reduced cytochrome c to oxygen. This component is a heteromeric complex consisting of 3 catalytic subunits encoded by mitochondrial genes and multiple structural subunits encoded by nuclear genes. The mitochondrially-encoded subunits function in electron transfer, and th…	hsa00190 (Oxidative phosphorylation), hsa01100 (Metabolic pathways), hsa04260 (Cardiac muscle contraction), hsa04714 (Thermogenesis), hsa04932 (Non-alcoholic fatty liver disease (NAFLD)), hsa05010 (Alzheimer disease), hsa05012 (Parkinson disease), hsa05016 (Huntington disease), GO:0006091 (generation of precursor metabolites and energy), GO:0006123 (mitochondrial electron transport, cytochrome c …		-0.175023	-0.134343	-0.0596159		0.192424	0.108866	0.067692				224.02	97.2419	8.89754	0.247156	8.90303	20.1807	0.000384256	0.0138452	0.000156104	0.000157431	0.1	0.310247	0.00975572	0.87831	0.924216	0.0213116	0.00839723		421.764	433.883	457.055	544.684	513.921	499.405
ENSG00000091073	DTX2	PC	deltex E3 ubiquitin ligase 2		DTX2 functions as an E3 ubiquitin ligase (Takeyama et al., 2003 [PubMed 12670957]).[supplied by OMIM, Nov 2009].	hsa04330 (Notch signaling pathway), GO:0007219 (Notch signaling pathway), GO:0016567 (protein ubiquitination), GO:0005654 (nucleoplasm), GO:0005737 (cytoplasm), GO:0031965 (nuclear membrane), GO:0005515 (protein binding), GO:0008270 (zinc ion binding), GO:0016740 (transferase activity), R-HSA-157118 (Homo sapiens: Signaling by NOTCH), R-HSA-162582 (Homo sapiens: Signal Transduction), R-HSA-198014…		0.268083	0.295431	0.175442		-0.239551	-0.279348	-0.220058				223.639	51.1586	30.9555	-0.539911	4.44159	20.1312	0.000388621	0.0139162	5.03987e-05	5.59811e-05	0.1	0.310247	0.00371673	-0.87831	-0.983858	0.0213116	0.000388738		25.8359	26.3686	24.1046	17.579	17.0463	17.8454
ENSG00000159873	CCDC117	PC	coiled-coil domain containing 117			GO:0005515 (protein binding)		-0.492275	-0.465807	-0.107667		0.635351	0.439224	-0.00882585				223.577	48.314	80.1556	0.802676	4.27792	20.1231	0.000389344	0.0139162	2.35697e-05	2.61393e-05	0.1	0.310247	0.0716486	0.87831	0.821361	0.0213116	0.0450174		12.3852	12.6516	16.78	29.4316	25.4363	18.1117
ENSG00000170017	ALCAM	PC	activated leukocyte cell adhesion molecule		This gene encodes activated leukocyte cell adhesion molecule (ALCAM), also known as CD166 (cluster of differentiation 166), which is a member of a subfamily of immunoglobulin receptors with five immunoglobulin-like domains (VVC2C2C2) in the extracellular domain. This protein binds to T-cell differentiation antigene CD6, and is implicated in the processes of cell adhesion and migration. Multiple a…	hsa04514 (Cell adhesion molecules (CAMs)), GO:0002250 (adaptive immune response), GO:0007155 (cell adhesion), GO:0007157 (heterophilic cell-cell adhesion via plasma membrane cell adhesion molecules), GO:0007165 (signal transduction), GO:0008045 (motor neuron axon guidance), GO:0031290 (retinal ganglion cell axon guidance), GO:0048846 (axon extension involved in axon guidance), GO:1990138 (neuron …		-0.0925004	-0.276555	-0.184469		0.381174	0.189456	-0.0171063				223.46	93.3166	79.6714	0.379501	7.83734	20.1079	0.000390693	0.0139162	4.40067e-05	4.4559e-05	0.1	0.310247	0.0881569	0.87831	0.806156	0.0213116	0.0527215		211.481	185.912	198.297	294.449	257.56	222.934
ENSG00000112531	QKI	PC	QKI, KH domain containing RNA binding		The protein encoded by this gene is an RNA-binding protein that regulates pre-mRNA splicing, export of mRNAs from the nucleus, protein translation, and mRNA stability. The encoded protein is involved in myelinization and oligodendrocyte differentiation and may play a role in schizophrenia. Multiple transcript variants encoding different isoforms have been found for this gene. [provided by RefSeq,…	GO:0001570 (vasculogenesis), GO:0006397 (mRNA processing), GO:0007286 (spermatid development), GO:0008380 (RNA splicing), GO:0010628 (positive regulation of gene expression), GO:0042552 (myelination), GO:0042692 (muscle cell differentiation), GO:0042759 (long-chain fatty acid biosynthetic process), GO:0051028 (mRNA transport), GO:0061158 (3'-UTR-mediated mRNA destabilization), GO:0005634 (nucleus…		-0.691172	-0.146309	-0.374065		0.7787	0.172316	0.26053				223.43	35.9156	86.2343	0.962224	3.59918	20.1041	0.000391039	0.0139162	2.20177e-05	2.53816e-05	0.1	0.310247	0.0709833	0.87831	0.820276	0.0213116	0.0455484		6.12603	9.85492	8.12365	20.5089	12.7848	13.717
ENSG00000143727	ACP1	PC	acid phosphatase 1		The product of this gene belongs to the phosphotyrosine protein phosphatase family of proteins. It functions as an acid phosphatase and a protein tyrosine phosphatase by hydrolyzing protein tyrosine phosphate to protein tyrosine and orthophosphate. This enzyme also hydrolyzes orthophosphoric monoesters to alcohol and orthophosphate. This gene is genetically polymorphic, and three common alleles s…	hsa00730 (Thiamine metabolism), hsa00740 (Riboflavin metabolism), hsa01100 (Metabolic pathways), hsa04520 (Adherens junction), GO:0035335 (peptidyl-tyrosine dephosphorylation), GO:0005737 (cytoplasm), GO:0009898 (cytoplasmic side of plasma membrane), GO:0070062 (extracellular vesicular exosome), GO:0003993 (acid phosphatase activity), GO:0004726 (non-membrane spanning protein tyrosine phosphatase…		-0.205895	-0.110565	-0.0952716		0.135064	0.100062	0.176606				222.949	90.083	14.0164	0.277406	7.33059	20.0417	0.000396659	0.014022	7.68659e-05	7.83302e-05	0.1	0.310247	0.00277119	0.87831	0.96095	0.0213116	0.00225761		138.368	147.957	149.555	175.79	171.529	180.984
ENSG00000165264	NDUFB6	PC	NADH:ubiquinone oxidoreductase subunit B6		The protein encoded by this gene is a subunit of the multisubunit NADH:ubiquinone oxidoreductase (complex I). Mammalian complex I is composed of 45 different subunits. It locates at the mitochondrial inner membrane. This protein has NADH dehydrogenase activity and oxidoreductase activity. It transfers electrons from NADH to the respiratory chain. The immediate electron acceptor for the enzyme is …	hsa00190 (Oxidative phosphorylation), hsa01100 (Metabolic pathways), hsa04714 (Thermogenesis), hsa04723 (Retrograde endocannabinoid signaling), hsa04932 (Non-alcoholic fatty liver disease (NAFLD)), hsa05010 (Alzheimer disease), hsa05012 (Parkinson disease), hsa05016 (Huntington disease), GO:0006120 (mitochondrial electron transport, NADH to ubiquinone), GO:0032981 (mitochondrial respiratory chain…		-0.100498	-0.279612	-0.132033		0.277407	0.209836	0.0249003				222.865	87.8437	19.559	0.348473	7.03951	20.0308	0.00039765	0.014022	4.78875e-05	4.87779e-05	0.1	0.310247	0.0336736	0.87831	0.87269	0.0213116	0.0232802		121.189	106.806	118.525	158.078	150.754	132.376
ENSG00000004700	RECQL	PC	RecQ like helicase		The protein encoded by this gene is a member of the RecQ DNA helicase family. DNA helicases are enzymes involved in various types of DNA repair, including mismatch repair, nucleotide excision repair and direct repair. Some members of this family are associated with genetic disorders with predisposition to malignancy and chromosomal instability. The biological function of this helicase has not yet…	GO:0000724 (double-strand break repair via homologous recombination), GO:0000733 (DNA strand renaturation), GO:0006281 (DNA repair), GO:0032508 (DNA duplex unwinding), GO:0005634 (nucleus), GO:0005654 (nucleoplasm), GO:0005694 (chromosome), GO:0005737 (cytoplasm), GO:0016020 (membrane), GO:0003677 (DNA binding), GO:0003678 (DNA helicase activity), GO:0004003 (ATP-dependent DNA helicase activity),…		-0.195973	-0.342802	-0.20933		0.468697	0.187106	0.0923027				222.631	60.7384	43.8651	0.538577	5.00028	20.0004	0.000400427	0.0140525	3.84454e-05	4.15331e-05	0.1	0.310247	0.0573977	0.87831	0.87095	0.0213116	0.0239061		26.9013	24.1046	26.6349	43.8144	35.6908	33.2936
ENSG00000106245	BUD31	PC	BUD31 homolog			hsa03040 (Spliceosome), GO:0000398 (mRNA splicing, via spliceosome), GO:0006357 (regulation of transcription from RNA polymerase II promoter), GO:2000825 (positive regulation of androgen receptor activity), GO:0000790 (nuclear chromatin), GO:0005634 (nucleus), GO:0005654 (nucleoplasm), GO:0005681 (spliceosomal complex), GO:0003700 (sequence-specific DNA binding transcription factor activity), GO:…		-0.205428	-0.330554	-0.0202962		0.342812	0.141142	0.072324				222.588	92.2791	10.1167	0.373524	7.64566	19.9948	0.000400944	0.0140525	4.5162e-05	4.57737e-05	0.1	0.310247	0.0410992	0.87831	0.832402	0.0213116	0.03978		171.129	156.746	194.834	251.167	218.14	207.885
ENSG00000187446	CHP1	PC	calcineurin like EF-hand protein 1		This gene encodes a phosphoprotein that binds to the Na+/H+ exchanger NHE1. This protein serves as an essential cofactor which supports the physiological activity of NHE family members and may play a role in the mitogenic regulation of NHE1. The protein shares similarity with calcineurin B and calmodulin and it is also known to be an endogenous inhibitor of calcineurin activity. [provided by RefS…	GO:0001578 (microtubule bundle formation), GO:0001933 (negative regulation of protein phosphorylation), GO:0006469 (negative regulation of protein kinase activity), GO:0006611 (protein export from nucleus), GO:0006813 (potassium ion transport), GO:0007264 (small GTPase mediated signal transduction), GO:0010923 (negative regulation of phosphatase activity), GO:0017156 (calcium ion-dependent exocyt…		-0.220776	-0.145944	-0.158683		0.26511	0.114436	0.145856				222.287	76.4396	24.3061	0.362105	6.04122	19.9558	0.000404544	0.0141066	5.14308e-05	5.30654e-05	0.1	0.310247	0.0125998	0.87831	0.952535	0.0213116	0.00332594		55.5338	58.5968	58.0641	78.573	70.5825	72.1806
ENSG00000139168	ZCRB1	PC	zinc finger CCHC-type and RNA binding motif containing 1		Pre-mRNA splicing is catalyzed by the spliceosome. U12-type spliceosome binds U12-type pre-mRNAs and recognizes the 5_ splice site and branch-point sequence. U11 and U12 snRNPs are components of U12-type spliceosome and function as a molecular bridge connecting both ends of the intron. The protein encoded by this gene contains a RNA recognition motif. It was identified as one of the protein compo…	GO:0000398 (mRNA splicing, via spliceosome), GO:0008380 (RNA splicing), GO:0005654 (nucleoplasm), GO:0005689 (U12-type spliceosomal complex), GO:0003723 (RNA binding), GO:0008270 (zinc ion binding), R-HSA-72165 (Homo sapiens: mRNA Splicing - Minor Pathway), R-HSA-72172 (Homo sapiens: mRNA Splicing), R-HSA-72203 (Homo sapiens: Processing of Capped Intron-Containing Pre-mRNA), R-HSA-74160 (Homo sap…		-0.0596422	-0.188608	-0.176272		0.179909	0.084026	0.160587				222.255	89.8409	15.9533	0.285995	7.30551	19.9517	0.000404926	0.0141066	7.4472e-05	7.58728e-05	0.1	0.310247	0.0050225	0.87831	0.943876	0.0213116	0.00463648		150.62	137.569	138.768	178.188	166.601	175.79
ENSG00000228716	DHFR	PC	dihydrofolate reductase		Dihydrofolate reductase converts dihydrofolate into tetrahydrofolate, a methyl group shuttle required for the de novo synthesis of purines, thymidylic acid, and certain amino acids. While the functional dihydrofolate reductase gene has been mapped to chromosome 5, multiple intronless processed pseudogenes or dihydrofolate reductase-like genes have been identified on separate chromosomes. Dihydrof…	hsa00670 (One carbon pool by folate), hsa00790 (Folate biosynthesis), hsa01100 (Metabolic pathways), hsa01523 (Antifolate resistance), GO:0000082 (G1/S transition of mitotic cell cycle), GO:0000083 (regulation of transcription involved in G1/S transition of mitotic cell cycle), GO:0006545 (glycine biosynthetic process), GO:0006729 (tetrahydrobiopterin biosynthetic process), GO:0006730 (one-carbon…		-0.221657	-0.100581	-0.169291		0.173586	0.203159	0.114783				222.02	79.9239	54.8898	0.335653	6.29718	19.9212	0.000407777	0.0141632	5.52737e-05	5.69115e-05	0.1	0.310247	0.00158442	0.87831	0.967747	0.0213116	0.00154359		66.4541	72.447	68.9844	88.0284	89.8928	84.4327
ENSG00000134970	TMED7	PC	transmembrane p24 trafficking protein 7			GO:0006888 (ER to Golgi vesicle-mediated transport), GO:0006890 (retrograde vesicle-mediated transport, Golgi to ER), GO:0015031 (protein transport), GO:0000139 (Golgi membrane), GO:0005783 (endoplasmic reticulum), GO:0005789 (endoplasmic reticulum membrane), GO:0005793 (endoplasmic reticulum-Golgi intermediate compartment), GO:0005794 (Golgi apparatus), GO:0016021 (integral component of membrane…		-0.67482	-0.0397801	-0.585586		0.551636	0.603158	0.145392				221.105	27.8402	63.3031	1.06538	3.14667	19.8028	0.000419043	0.0144475	1.83475e-05	2.19592e-05	0.1	0.310247	0.0241679	0.87831	0.87332	0.0213116	0.0230551		4.26159	7.72412	4.66111	12.6516	13.1843	9.05587
ENSG00000196576	PLXNB2	PC	plexin B2		Members of the B class of plexins, such as PLXNB2 are transmembrane receptors that participate in axon guidance and cell migration in response to semaphorins (Perrot et al. (2002) [PubMed 12183458]).[supplied by OMIM, Mar 2008]. Sequence Note: This RefSeq record was created from transcript and genomic sequence data to make the sequence consistent with the reference genome assembly. The genomic co…	hsa04360 (Axon guidance), GO:0001843 (neural tube closure), GO:0001932 (regulation of protein phosphorylation), GO:0007156 (homophilic cell adhesion via plasma membrane adhesion molecules), GO:0007162 (negative regulation of cell adhesion), GO:0007405 (neuroblast proliferation), GO:0007420 (brain development), GO:0008360 (regulation of cell shape), GO:0010976 (positive regulation of neuron projec…		0.116259	0.139781	0.206275		-0.188471	-0.135744	-0.138099				221.105	81.9211	79.1007	-0.3155	6.46751	19.8028	0.000419043	0.0144475	6.67603e-05	6.86597e-05	0.1	0.310247	0.00289502	-0.87831	-0.97681	0.0213116	0.000800454		95.2198	96.8179	101.479	76.7085	79.6384	79.5052
ENSG00000100075	SLC25A1	PC	solute carrier family 25 member 1		This gene encodes a member of the mitochondrial carrier subfamily of solute carrier proteins. Members of this family include nuclear-encoded transporters that translocate small metabolites across the mitochondrial membrane. This protein regulates the movement of citrate across the inner membranes of the mitochondria. Mutations in this gene have been associated with combined D-2- and L-2-hydroxygl…	GO:0006094 (gluconeogenesis), GO:0006843 (mitochondrial citrate transport), GO:0035338 (long-chain fatty-acyl-CoA biosynthetic process), GO:0035674 (tricarboxylic acid transmembrane transport), GO:0005634 (nucleus), GO:0005743 (mitochondrial inner membrane), GO:0016021 (integral component of membrane), GO:0070062 (extracellular vesicular exosome), GO:0015137 (citrate transmembrane transporter act…		0.0404706	0.242353	0.178728		-0.286738	-0.0573759	-0.117438				221.051	94.9939	34.8725	-0.309009	8.19358	19.7959	0.000419708	0.0144475	8.03606e-05	8.1267e-05	0.1	0.310247	0.0263565	-0.87831	-0.864978	0.0213116	0.0261156		298.577	343.724	328.808	237.583	278.868	267.415
ENSG00000137267	TUBB2A	PC	tubulin beta 2A class IIa			hsa04145 (Phagosome), hsa04540 (Gap junction), hsa05130 (Pathogenic Escherichia coli infection), GO:0007010 (cytoskeleton organization), GO:0007017 (microtubule-based process), GO:0005634 (nucleus), GO:0005737 (cytoplasm), GO:0005874 (microtubule), GO:0015630 (microtubule cytoskeleton), GO:0070062 (extracellular vesicular exosome), GO:1903561 (extracellular vesicle), GO:0003924 (GTPase activity),…		-0.307125	-0.248239	-0.210275		0.31079	0.362087	0.0927621				220.862	51.9194	36.8872	0.561677	4.48657	19.7715	0.000422085	0.0144862	5.23712e-05	5.78481e-05	0.1	0.310247	0.0271957	0.87831	0.933978	0.0213116	0.00639453		17.1795	17.9786	18.5113	27.434	28.4994	23.3055
ENSG00000134294	SLC38A2	PC	solute carrier family 38 member 2			hsa04724 (Glutamatergic synapse), hsa04727 (GABAergic synapse), hsa04974 (Protein digestion and absorption), GO:0003333 (amino acid transmembrane transport), GO:0006814 (sodium ion transport), GO:0006865 (amino acid transport), GO:0007565 (female pregnancy), GO:0014047 (glutamate secretion), GO:0021987 (cerebral cortex development), GO:0031460 (glycine betaine transport), GO:0032328 (alanine tran…		-0.394514	-0.185344	-0.174322		0.444625	0.421565	-0.112009				220.502	83.8233	49.0272	0.531819	6.63668	19.7249	0.000426647	0.0145994	2.46964e-05	2.51265e-05	0.1	0.310247	0.113316	0.87831	0.778941	0.0213116	0.0678997		73.1128	84.8322	85.4981	132.376	130.245	89.3601
ENSG00000196352	CD55	PC	CD55 molecule (Cromer blood group)		This gene encodes a glycoprotein involved in the regulation of the complement cascade. Binding of the encoded protein to complement proteins accelerates their decay, thereby disrupting the cascade and preventing damage to host cells. Antigens present on this protein constitute the Cromer blood group system (CROM). Alternative splicing results in multiple transcript variants. The predominant trans…	hsa04610 (Complement and coagulation cascades), hsa04640 (Hematopoietic cell lineage), hsa05416 (Viral myocarditis), GO:0006888 (ER to Golgi vesicle-mediated transport), GO:0006958 (complement activation, classical pathway), GO:0007204 (positive regulation of cytosolic calcium ion concentration), GO:0030449 (regulation of complement activation), GO:0031664 (regulation of lipopolysaccharide-mediat…		-0.10114	-0.226363	-0.304765		0.379025	0.0384767	0.214767				220.245	74.866	63.9775	0.439861	5.93059	19.6918	0.000429932	0.0146684	4.1084e-05	4.21792e-05	0.1	0.310247	0.0464628	0.87831	0.863693	0.0213116	0.0266032		55.667	50.8727	48.076	78.4398	61.5266	69.7835
ENSG00000123374	CDK2	PC	cyclin dependent kinase 2		This gene encodes a member of a family of serine/threonine protein kinases that participate in cell cycle regulation. The encoded protein is the catalytic subunit of the cyclin-dependent protein kinase complex, which regulates progression through the cell cycle. Activity of this protein is especially critical during the G1 to S phase transition. This protein associates with and regulated by other…	hsa04068 (FoxO signaling pathway), hsa04110 (Cell cycle), hsa04114 (Oocyte meiosis), hsa04115 (p53 signaling pathway), hsa04151 (PI3K-Akt signaling pathway), hsa04218 (Cellular senescence), hsa04914 (Progesterone-mediated oocyte maturation), hsa04934 (Cushing syndrome), hsa05160 (Hepatitis C), hsa05161 (Hepatitis B), hsa05162 (Measles), hsa05165 (Human papillomavirus infection), hsa05166 (Human T…		-0.117542	-0.176364	-0.21756		0.336787	0.0351363	0.139542				220.092	86.8148	43.7268	0.351537	6.93505	19.672	0.000431903	0.0146923	5.63309e-05	5.74273e-05	0.1	0.310247	0.0674938	0.87831	0.856791	0.0213116	0.0292948		111.334	106.806	103.743	153.284	123.986	133.441
ENSG00000164258	NDUFS4	PC	NADH:ubiquinone oxidoreductase subunit S4		This gene encodes an accessory subunit of the mitochondrial membrane respiratory chain NADH dehydrogenase (Complex I), or NADH:ubiquinone oxidoreductase, the first multi-subunit enzyme complex of the mitochondrial respiratory chain. Complex I plays a vital role in cellular ATP production, the primary source of energy for many crucial processes in living cells. It removes electrons from NADH and p…	hsa00190 (Oxidative phosphorylation), hsa01100 (Metabolic pathways), hsa04714 (Thermogenesis), hsa04723 (Retrograde endocannabinoid signaling), hsa04932 (Non-alcoholic fatty liver disease (NAFLD)), hsa05010 (Alzheimer disease), hsa05012 (Parkinson disease), hsa05016 (Huntington disease), GO:0001932 (regulation of protein phosphorylation), GO:0006120 (mitochondrial electron transport, NADH to ubiq…		-0.114931	-0.212501	-0.0992923		0.224445	0.0819633	0.120317				219.685	89.8236	7.12495	0.288491	7.30328	19.6195	0.000437191	0.0148286	8.36369e-05	8.51917e-05	0.1	0.310247	0.010634	0.87831	0.928463	0.0213116	0.00749337		144.628	135.039	146.226	183.515	166.069	170.597
ENSG00000164741	DLC1	PC	DLC1 Rho GTPase activating protein		This gene encodes a GTPase-activating protein (GAP) that is a member of the rhoGAP family of proteins which play a role in the regulation of small GTP-binding proteins. GAP family proteins participate in signaling pathways that regulate cell processes involved in cytoskeletal changes. This gene functions as a tumor suppressor gene in a number of common cancers, including prostate, lung, colorecta…	GO:0001843 (neural tube closure), GO:0003007 (heart morphogenesis), GO:0006915 (apoptotic process), GO:0006919 (activation of cysteine-type endopeptidase activity involved in apoptotic process), GO:0007165 (signal transduction), GO:0008285 (negative regulation of cell proliferation), GO:0008360 (regulation of cell shape), GO:0021575 (hindbrain morphogenesis), GO:0030036 (actin cytoskeleton organi…		-0.105737	-0.271173	-0.147662		0.290759	0.22228	0.0115333				219.363	85.7513	70.3415	0.359028	6.83874	19.578	0.00044142	0.0149067	5.45793e-05	5.56787e-05	0.1	0.310247	0.0444847	0.87831	0.865495	0.0213116	0.0259208		104.942	93.3554	101.879	138.768	132.242	113.997
ENSG00000138835	RGS3	PC	regulator of G protein signaling 3		This gene encodes a member of the regulator of G-protein signaling (RGS) family. This protein is a GTPase-activating protein that inhibits G-protein-mediated signal transduction. Alternative splicing and the use of alternative promoters results in multiple transcript variants encoding different isoforms. Long isoforms are largely cytosolic and plasma membrane-associated with a function in Wnt sig…	hsa04360 (Axon guidance), GO:0000188 (inactivation of MAPK activity), GO:0008277 (regulation of G-protein coupled receptor protein signaling pathway), GO:0043547 (positive regulation of GTPase activity), GO:0005654 (nucleoplasm), GO:0005829 (cytosol), GO:0005886 (plasma membrane), GO:0005096 (GTPase activator activity), GO:0005515 (protein binding), R-HSA-162582 (Homo sapiens: Signal Transduction…		0.331011	0.155741	0.229735		-0.247798	-0.256957	-0.211732				219.314	53.2423	65.8193	-0.520857	4.56171	19.5717	0.00044207	0.0149067	6.33728e-05	6.98744e-05	0.1	0.310247	0.0128027	-0.87831	-0.969021	0.0213116	0.00142471		29.4316	25.8359	27.3008	19.044	18.9108	19.5767
ENSG00000139793	MBNL2	PC	muscleblind like splicing regulator 2		This gene is a member of the muscleblind protein family which was initially described in Drosophila melanogaster. This gene encodes a C3H-type zinc finger protein that modulates alternative splicing of pre-mRNAs. Muscleblind proteins bind specifically to expanded dsCUG RNA but not to normal size CUG repeats and may thereby play a role in the pathophysiology of myotonic dystrophy. Several alternat…	GO:0000381 (regulation of alternative mRNA splicing, via spliceosome), GO:0006397 (mRNA processing), GO:0008380 (RNA splicing), GO:0043484 (regulation of RNA splicing), GO:0005654 (nucleoplasm), GO:0005737 (cytoplasm), GO:0003723 (RNA binding), GO:0046872 (metal ion binding)		-0.385617	-0.418025	-0.292543		0.497307	0.389079	0.209799				219.079	19.5314	94.1202	0.989223	2.67133	19.5414	0.000445189	0.0149682	3.02048e-05	3.79626e-05	0.1	0.310247	0.0147739	0.87831	0.95832	0.0213116	0.00256968		3.99524	3.86206	4.39476	9.05587	8.25682	7.05825
ENSG00000136938	ANP32B	PC	acidic nuclear phosphoprotein 32 family member B			GO:0001944 (vasculature development), GO:0006334 (nucleosome assembly), GO:0006919 (activation of cysteine-type endopeptidase activity involved in apoptotic process), GO:0021591 (ventricular system development), GO:0045596 (negative regulation of cell differentiation), GO:0046827 (positive regulation of protein export from nucleus), GO:0048839 (inner ear development), GO:0060021 (palate developme…		-0.0870402	-0.238446	-0.155818		0.354697	0.0518054	0.0748018				218.713	97.8644	15.3826	0.327318	9.25635	19.4943	0.000450095	0.0150893	0.00012391	0.000124865	0.1	0.310247	0.0876938	0.87831	0.808668	0.0213116	0.05141		570.12	513.122	543.485	775.076	627.918	638.039
ENSG00000139266	MARCH9	PC	membrane associated ring-CH-type finger 9		MARCH9 is a member of the MARCH family of membrane-bound E3 ubiquitin ligases (EC 6.3.2.19). MARCH enzymes add ubiquitin (see MIM 191339) to target lysines in substrate proteins, thereby signaling their vesicular transport between membrane compartments. MARCH9 induces internalization of several membrane glycoproteins and directs them to the endosomal compartment (Bartee et al., 2004 [PubMed 14722…	GO:0016567 (protein ubiquitination), GO:0000139 (Golgi membrane), GO:0005765 (lysosomal membrane), GO:0005795 (Golgi stack), GO:0005802 (trans-Golgi network), GO:0016021 (integral component of membrane), GO:0008270 (zinc ion binding), GO:0016740 (transferase activity)		0.246267	0.231522	0.206606		-0.257827	-0.350929	-0.0756388				218.586	60.6087	67.54	-0.480651	4.99326	19.478	0.000451807	0.0150958	5.16528e-05	5.59891e-05	0.1	0.310247	0.0199173	-0.87831	-0.953922	0.0213116	0.00313586		37.2889	36.8894	36.2235	25.7027	23.9714	29.4316
ENSG00000142327	RNPEPL1	PC	arginyl aminopeptidase like 1					0.0226487	0.261371	0.366093		-0.32496	-0.0972119	-0.22794				218.469	73.5086	67.1855	-0.453048	5.82497	19.4628	0.000453404	0.0150958	4.26237e-05	4.37867e-05	0.1	0.310247	0.0439127	-0.87831	-0.8626	0.0213116	0.0270213		56.466	66.9868	72.1806	43.9476	51.8049	47.1438
ENSG00000258728	AL162231.3	PC						0.253094	0.416407	0.0911863		-0.43683	-0.155342	-0.168516				218.41	60.4271	18.1323	-0.540431	4.97912	19.4553	0.000454205	0.0150958	4.26583e-05	4.60928e-05	0.1	0.310247	0.0246061	-0.87831	-0.884908	0.0213116	0.0191068		36.8894	41.5505	32.7609	22.107	27.3008	27.0344
ENSG00000137970	RPL7P9	processed_pseudogene	ribosomal protein L7 pseudogene 9					-0.272439	-0.411971	-0.446182		0.811915	0.482753	-0.164076				218.185	51.7465	11.0938	0.883124	4.47941	19.4264	0.000457272	0.0151542	2.39996e-05	2.63295e-05	0.1	0.310247	0.145794	0.87831	0.753333	0.0213116	0.0837625		16.78	15.0487	14.6492	37.8216	29.6979	18.2449
ENSG00000204381	LAYN	PC	layilin			GO:0001726 (ruffle), GO:0005925 (focal adhesion), GO:0009986 (cell surface), GO:0016021 (integral component of membrane), GO:0005540 (hyaluronic acid binding), GO:0030246 (carbohydrate binding)		-0.116319	-0.167327	-0.167327		0.240266	0.0524091	0.158298				218.051	85.881	52.7281	0.307742	6.84989	19.207	0.000481369	0.0154628	8.47687e-05	8.67057e-05	0.0765225	0.310247	0.0306864	0.891133	0.925418	0.017133	0.00813627		105.341	101.612	101.612	135.439	118.659	127.848
ENSG00000104442	ARMC1	PC	armadillo repeat containing 1			GO:0030001 (metal ion transport), GO:0005634 (nucleus), GO:0005737 (cytoplasm), GO:0005739 (mitochondrion), GO:0005515 (protein binding), GO:0046872 (metal ion binding)		-0.30206	-0.147112	-0.475674		0.48162	0.257813	0.185414				218.028	40.7574	53.6706	0.704095	3.87056	19.4062	0.000459437	0.0151824	4.92592e-05	5.59515e-05	0.1	0.310247	0.013944	0.87831	0.91575	0.0213116	0.0103481		10.9203	12.3852	9.45539	20.2425	17.0463	16.1141
ENSG00000182004	SNRPE	PC	small nuclear ribonucleoprotein polypeptide E			hsa03040 (Spliceosome), GO:0000245 (spliceosomal complex assembly), GO:0000387 (spliceosomal snRNP assembly), GO:0000398 (mRNA splicing, via spliceosome), GO:0006369 (termination of RNA polymerase II transcription), GO:0008334 (histone mRNA metabolic process), GO:0042633 (hair cycle), GO:0051170 (nuclear import), GO:0005634 (nucleus), GO:0005654 (nucleoplasm), GO:0005681 (spliceosomal complex), G…		-0.193285	-0.197534	-0.236351		0.380293	0.223854	0.0230227				217.528	71.1482	6.25162	0.442314	5.66504	19.342	0.00046638	0.0153679	5.35031e-05	5.51561e-05	0.1	0.310247	0.0679754	0.87831	0.872969	0.0213116	0.0231802		43.2817	43.1486	41.95	65.3887	58.4636	50.6063
ENSG00000174839	DENND6A	PC	DENN domain containing 6A			GO:0043547 (positive regulation of GTPase activity), GO:0061024 (membrane organization), GO:2000049 (positive regulation of cell-cell adhesion mediated by cadherin), GO:0005737 (cytoplasm), GO:0005829 (cytosol), GO:0043231 (intracellular membrane-bounded organelle), GO:0055037 (recycling endosome), GO:0017112 (Rab guanyl-nucleotide exchange factor activity), R-HSA-199991 (Homo sapiens: Membrane T…		-0.388339	-0.638207	-0.203985		0.659721	0.418764	0.152046				216.998	19.3066	32.5378	1.11724	2.66125	19.2738	0.000473883	0.0154628	2.45762e-05	3.07647e-05	0.1	0.310247	0.0323728	0.87831	0.889359	0.0213116	0.017685		3.86206	2.92984	4.66111	10.1213	8.25682	6.52555
ENSG00000101856	PGRMC1	PC	progesterone receptor membrane component 1		This gene encodes a putative membrane-associated progesterone steroid receptor. The protein is expressed predominantly in the liver and kidney. [provided by RefSeq, Mar 2010].	GO:0043312 (neutrophil degranulation), GO:0005789 (endoplasmic reticulum membrane), GO:0005886 (plasma membrane), GO:0012505 (endomembrane system), GO:0016020 (membrane), GO:0016021 (integral component of membrane), GO:0035579 (specific granule membrane), GO:0070062 (extracellular vesicular exosome), GO:0005496 (steroid binding), GO:0005515 (protein binding), GO:0020037 (heme binding), R-HSA-1682…		-0.206556	-0.0858149	-0.151509		0.270109	0.0477196	0.126051				216.944	91.1119	67.9464	0.301399	7.46968	19.2669	0.000474653	0.0154628	8.95989e-05	9.10583e-05	0.1	0.310247	0.038894	0.87831	0.882729	0.0213116	0.0198223		152.085	165.536	158.078	212.413	181.783	192.038
ENSG00000100258	LMF2	PC	lipase maturation factor 2			GO:0005789 (endoplasmic reticulum membrane), GO:0016020 (membrane), GO:0016021 (integral component of membrane), GO:0005515 (protein binding), R-HSA-1430728 (Homo sapiens: Metabolism), R-HSA-192456 (Homo sapiens: Digestion of dietary lipid), R-HSA-556833 (Homo sapiens: Metabolism of lipids and lipoproteins), R-HSA-73923 (Homo sapiens: Lipid digestion, mobilization, and transport)		0.0819625	0.22333	0.167651		-0.30258	-0.0461183	-0.124246				216.697	90.8957	52.3995	-0.316105	7.44601	19.2352	0.000478195	0.0154628	7.76521e-05	7.88969e-05	0.1	0.310247	0.0228	-0.87831	-0.888257	0.0213116	0.018032		182.982	202.026	194.302	139.7	167.267	158.345
ENSG00000267059	AC005943.1	PC			This gene encodes the smallest known component of the ubiquinol-cytochrome c reductase complex, which forms part of the mitochondrial respiratory chain. The encoded protein may function as a binding factor for the iron-sulfur protein in this complex. [provided by RefSeq, Oct 2009].	hsa00190 (Oxidative phosphorylation), hsa01100 (Metabolic pathways), hsa04260 (Cardiac muscle contraction), hsa04714 (Thermogenesis), hsa04932 (Non-alcoholic fatty liver disease (NAFLD)), hsa05010 (Alzheimer disease), hsa05012 (Parkinson disease), hsa05016 (Huntington disease), GO:0006091 (generation of precursor metabolites and energy), GO:0006122 (mitochondrial electron transport, ubiquinol to …		0.0829548	0.340311	0.19199		-0.424144	-0.0242852	-0.166827				216.562	87.446	23.7354	-0.411043	7.00278	19.218	0.00048013	0.0154628	4.76038e-05	4.8412e-05	0.1	0.310247	0.0378151	-0.87831	-0.83892	0.0213116	0.0368303		133.707	160.209	144.361	93.4885	123.986	112.133
ENSG00000109475	RPL34	PC	ribosomal protein L34		Ribosomes, the organelles that catalyze protein synthesis, consist of a small 40S subunit and a large 60S subunit. Together these subunits are composed of 4 RNA species and approximately 80 structurally distinct proteins. This gene encodes a ribosomal protein that is a component of the 60S subunit. The protein belongs to the L34E family of ribosomal proteins. It is located in the cytoplasm. This …	hsa03010 (Ribosome), GO:0000184 (nuclear-transcribed mRNA catabolic process, nonsense-mediated decay), GO:0006364 (rRNA processing), GO:0006412 (translation), GO:0006413 (translational initiation), GO:0006614 (SRP-dependent cotranslational protein targeting to membrane), GO:0019083 (viral transcription), GO:0042254 (ribosome biogenesis), GO:0005739 (mitochondrion), GO:0005829 (cytosol), GO:002262…		-0.0686407	-0.222176	-0.128468		0.277217	0.0579305	0.084137				216.489	97.1641	17.2417	0.282706	8.87302	19.2086	0.000481188	0.0154628	0.00015491	0.000156215	0.1	0.310247	0.0487548	0.87831	0.849194	0.0213116	0.032399		443.871	398.858	425.759	564.66	484.755	493.678
ENSG00000176845	METRNL	PC	meteorin like, glial cell differentiation regulator			GO:0009409 (response to cold), GO:0014850 (response to muscle activity), GO:0045444 (fat cell differentiation), GO:0050728 (negative regulation of inflammatory response), GO:0050873 (brown fat cell differentiation), GO:0090336 (positive regulation of brown fat cell differentiation), GO:2000507 (positive regulation of energy homeostasis), GO:0005615 (extracellular space), GO:0070062 (extracellular…		0.0401243	0.216723	0.192412		-0.206365	-0.101398	-0.141497				216.485	87.5757	28.9408	-0.305607	7.01571	19.208	0.000481252	0.0154628	8.47761e-05	8.65437e-05	0.1	0.310247	0.0230238	-0.87831	-0.915692	0.0213116	0.0103621		131.976	149.422	146.892	110.934	119.458	116.128
ENSG00000106609	TMEM248	PC	transmembrane protein 248			GO:0016021 (integral component of membrane), GO:0005515 (protein binding)		-0.15422	-0.140281	-0.245771		0.303927	0.237865	-0.00152062				216.475	82.4572	41.444	0.373375	6.50466	19.2068	0.00048139	0.0154628	6.08744e-05	6.22907e-05	0.1	0.310247	0.0607178	0.87831	0.86475	0.0213116	0.0262019		80.3043	81.1033	75.2436	111.068	106.007	89.4933
ENSG00000143384	MCL1	PC	MCL1, BCL2 family apoptosis regulator		This gene encodes an anti-apoptotic protein, which is a member of the Bcl-2 family. Alternative splicing results in multiple transcript variants. The longest gene product (isoform 1) enhances cell survival by inhibiting apoptosis while the alternatively spliced shorter gene products (isoform 2 and isoform 3) promote apoptosis and are death-inducing. [provided by RefSeq, Oct 2010].	hsa04151 (PI3K-Akt signaling pathway), hsa04210 (Apoptosis), hsa04630 (JAK-STAT signaling pathway), hsa05206 (MicroRNAs in cancer), GO:0001709 (cell fate determination), GO:0007275 (multicellular organismal development), GO:0008630 (intrinsic apoptotic signaling pathway in response to DNA damage), GO:0008637 (apoptotic mitochondrial changes), GO:0010507 (negative regulation of autophagy), GO:0019…		-0.140054	-0.208803	-0.157331		0.321073	-0.0116654	0.19678				216.414	88.1809	82.8275	0.348728	7.07842	19.1989	0.000482281	0.0154628	6.87143e-05	6.996e-05	0.1	0.310247	0.0813845	0.87831	0.844658	0.0213116	0.0343225		121.056	115.329	119.591	167.4	132.509	153.417
ENSG00000258377	AL139099.1	antisense						0.216468	0.275359	0.242002		-0.49632	-0.170201	-0.067308				216.39	64.4994	83.2858	-0.504106	5.22753	19.1959	0.000482627	0.0154628	3.96586e-05	4.2533e-05	0.1	0.310247	0.0407694	-0.87831	-0.912943	0.0213116	0.0110384		42.749	44.6135	43.5481	25.3032	32.2282	34.7586
ENSG00000113387	SUB1	PC	SUB1 homolog, transcriptional regulator			GO:0006357 (regulation of transcription from RNA polymerase II promoter), GO:0006366 (transcription from RNA polymerase II promoter), GO:0060261 (positive regulation of transcription initiation from RNA polymerase II promoter), GO:0060395 (SMAD protein signal transduction), GO:0005634 (nucleus), GO:0005667 (transcription factor complex), GO:0005730 (nucleolus), GO:0070062 (extracellular vesicular…		-0.0754994	-0.320761	-0.135794		0.35341	0.163549	0.0150951				216.278	93.9045	37.1725	0.360543	7.95364	19.1815	0.000484255	0.0154721	7.03649e-05	7.12167e-05	0.1	0.310247	0.0637613	0.87831	0.812962	0.0213116	0.0492033		232.256	195.633	222.668	313.36	274.473	247.438
ENSG00000153250	RBMS1	PC	RNA binding motif single stranded interacting protein 1		This gene encodes a member of a small family of proteins which bind single stranded DNA/RNA. These proteins are characterized by the presence of two sets of ribonucleoprotein consensus sequence (RNP-CS) that contain conserved motifs, RNP1 and RNP2, originally described in RNA binding proteins, and required for DNA binding. These proteins have been implicated in such diverse functions as DNA repli…	GO:0006260 (DNA replication), GO:0006396 (RNA processing), GO:0005634 (nucleus), GO:0003690 (double-stranded DNA binding), GO:0003697 (single-stranded DNA binding), GO:0003723 (RNA binding), GO:0005515 (protein binding)		-0.290517	-0.118867	-0.199694		0.316808	0.176916	0.115354				215.952	67.9751	73.5495	0.42558	5.45625	19.1398	0.000489035	0.0155818	6.48347e-05	6.91393e-05	0.1	0.310247	0.0119089	0.87831	0.928433	0.0213116	0.00749938		34.8917	39.5528	37.2889	54.202	49.0082	46.8774
ENSG00000115128	SF3B6	PC	splicing factor 3b subunit 6		This gene encodes a 14 kDa protein subunit of the splicing factor 3b complex. Splicing factor 3b associates with both the U2 and U11/U12 small nuclear ribonucleoprotein complexes (U2 snRNP) of spliceosomes. This 14 kDa protein interacts directly with subunit 1 of the splicing factor 3b complex. This 14 kDa protein also interacts directly with the adenosine that carries out the first transesterifi…	hsa03040 (Spliceosome), GO:0000398 (mRNA splicing, via spliceosome), GO:0001825 (blastocyst formation), GO:0005654 (nucleoplasm), GO:0005684 (U2-type spliceosomal complex), GO:0005686 (U2 snRNP), GO:0005689 (U12-type spliceosomal complex), GO:0071011 (precatalytic spliceosome), GO:0071013 (catalytic step 2 spliceosome), GO:0003723 (RNA binding), R-HSA-72163 (Homo sapiens: mRNA Splicing - Major Pa…		-0.154305	-0.195506	-0.0480641		0.220461	0.0758364	0.101577				215.824	95.0545	11.0419	0.267089	8.20253	19.1233	0.000490932	0.0155992	0.000141912	0.000143575	0.1	0.310247	0.0153582	0.87831	0.901127	0.0213116	0.0141805		262.887	255.429	283.129	341.46	308.699	314.292
ENSG00000144224	UBXN4	PC	UBX domain protein 4		UBXD2 is an integral membrane protein of the endoplasmic reticulum (ER) that binds valosin-containing protein (VCP; MIM 601023) and promotes ER-associated protein degradation (ERAD) (Liang et al., 2006 [PubMed 16968747]).[supplied by OMIM, Mar 2008].	GO:0006986 (response to unfolded protein), GO:0030433 (ER-associated ubiquitin-dependent protein catabolic process), GO:0005635 (nuclear envelope), GO:0005783 (endoplasmic reticulum), GO:0005789 (endoplasmic reticulum membrane), GO:0005829 (cytosol), GO:0005515 (protein binding)		-0.293195	-0.261901	-0.154552		0.45507	0.195811	0.0587662				215.315	63.5483	47.2374	0.50848	5.17531	19.0581	0.000498533	0.0157973	5.64609e-05	6.05193e-05	0.1	0.310247	0.066189	0.87831	0.858783	0.0213116	0.0285054		28.3662	29.0321	31.4292	49.0082	40.6182	36.7562
ENSG00000108468	CBX1	PC	chromobox 1		This gene encodes a highly conserved nonhistone protein, which is a member of the heterochromatin protein family . The protein is enriched in the heterochromatin and associated with centromeres. The protein has a single N-terminal chromodomain which can bind to histone proteins via methylated lysine residues, and a C-terminal chromo shadow-domain (CSD) which is responsible for the homodimerizatio…	GO:0045892 (negative regulation of transcription, DNA-templated), GO:0000775 (chromosome, centromeric region), GO:0000784 (nuclear chromosome, telomeric region), GO:0000785 (chromatin), GO:0001939 (female pronucleus), GO:0001940 (male pronucleus), GO:0005654 (nucleoplasm), GO:0005720 (nuclear heterochromatin), GO:0005721 (pericentric heterochromatin), GO:0005819 (spindle), GO:0010369 (chromocente…		-0.159971	-0.127565	-0.0629422		0.105562	0.133686	0.111231				215.1	95.409	35.7804	0.234619	8.29351	19.0306	0.000501782	0.015852	0.000189094	0.000191343	0.1	0.310247	0.00704208	0.87831	0.972324	0.0213116	0.00113835		279.4	285.793	298.977	336.266	342.924	337.597
ENSG00000076201	PTPN23	PC	protein tyrosine phosphatase, non-receptor type 23			GO:0010633 (negative regulation of epithelial cell migration), GO:0015031 (protein transport), GO:0035335 (peptidyl-tyrosine dephosphorylation), GO:0043162 (ubiquitin-dependent protein catabolic process via the multivesicular body sorting pathway), GO:0060271 (cilium morphogenesis), GO:1903387 (positive regulation of homophilic cell adhesion), GO:1903393 (positive regulation of adherens junction …		0.125009	0.29792	0.137204		-0.302312	-0.19752	-0.0603003				215.019	77.9007	76.8439	-0.38275	6.14848	19.0204	0.000502998	0.015852	6.2341e-05	6.4074e-05	0.1	0.310247	0.0140354	-0.87831	-0.901828	0.0213116	0.0139836		76.4422	86.4303	77.1081	56.3328	60.7276	66.9868
ENSG00000118785	SPP1	PC	secreted phosphoprotein 1		The protein encoded by this gene is involved in the attachment of osteoclasts to the mineralized bone matrix. The encoded protein is secreted and binds hydroxyapatite with high affinity. The osteoclast vitronectin receptor is found in the cell membrane and may be involved in the binding to this protein. This protein is also a cytokine that upregulates expression of interferon-gamma and interleuki…	hsa04151 (PI3K-Akt signaling pathway), hsa04371 (Apelin signaling pathway), hsa04510 (Focal adhesion), hsa04512 (ECM-receptor interaction), hsa04620 (Toll-like receptor signaling pathway), hsa05165 (Human papillomavirus infection), GO:0001649 (osteoblast differentiation), GO:0006710 (androgen catabolic process), GO:0006954 (inflammatory response), GO:0007155 (cell adhesion), GO:0007566 (embryo im…		1.98945	0.155479	-0.080502		-0.527753	-0.871497	-0.665178				214.628	20.543	24.4704	-2.44942	2.7256	18.9703	0.000508988	0.0159971	3.48245e-06	4.85015e-06	0.1	0.310247	0.293207	-0.87831	-0.576537	0.0213116	0.231013		23.1724	5.06063	3.99524	2.39714	1.46492	1.99762
ENSG00000160801	PTH1R	PC	parathyroid hormone 1 receptor		The protein encoded by this gene is a member of the G-protein coupled receptor family 2. This protein is a receptor for parathyroid hormone (PTH) and for parathyroid hormone-like hormone (PTHLH). The activity of this receptor is mediated by G proteins which activate adenylyl cyclase and also a phosphatidylinositol-calcium second messenger system. Defects in this receptor are known to be the cause…	hsa04080 (Neuroactive ligand-receptor interaction), hsa04928 (Parathyroid hormone synthesis, secretion and action), hsa04961 (Endocrine and other factor-regulated calcium reabsorption), GO:0001501 (skeletal system development), GO:0002062 (chondrocyte differentiation), GO:0002076 (osteoblast development), GO:0007166 (cell surface receptor signaling pathway), GO:0007186 (G-protein coupled receptor…		0.233154	0.350179	0.340781		-0.135181	-0.558909	-0.230024				214.357	41.0427	63.1301	-0.691603	3.88581	18.9357	0.000513174	0.0160395	5.09295e-05	5.78374e-05	0.1	0.310247	0.0138121	-0.87831	-0.940775	0.0213116	0.00515754		16.9132	18.5113	18.3781	12.6516	8.9227	11.7194
ENSG00000165684	SNAPC4	PC	small nuclear RNA activating complex polypeptide 4			GO:0006357 (regulation of transcription from RNA polymerase II promoter), GO:0006366 (transcription from RNA polymerase II promoter), GO:0006383 (transcription from RNA polymerase III promoter), GO:0009301 (snRNA transcription), GO:0030154 (cell differentiation), GO:0042795 (snRNA transcription from RNA polymerase II promoter), GO:0042796 (snRNA transcription from RNA polymerase III promoter), GO…		0.240954	0.169008	0.189356		-0.26803	-0.0907368	-0.240551				214.323	66.2459	91.751	-0.417655	5.33615	18.9313	0.000513703	0.0160395	7.46159e-05	7.99541e-05	0.1	0.310247	0.00555197	-0.87831	-0.964419	0.0213116	0.00187646		47.277	44.8798	45.5457	32.6278	37.1557	33.2936
ENSG00000164985	PSIP1	PC	PC4 and SFRS1 interacting protein 1			GO:0000395 (mRNA 5'-splice site recognition), GO:0006351 (transcription, DNA-templated), GO:0006355 (regulation of transcription, DNA-templated), GO:0006979 (response to oxidative stress), GO:0009408 (response to heat), GO:0051169 (nuclear transport), GO:0075713 (establishment of integrated proviral latency), GO:0005654 (nucleoplasm), GO:0005829 (cytosol), GO:0035327 (transcriptionally active chr…		-0.235328	-0.288621	-0.384827		0.703533	0.132187	0.0730562				214.257	58.9573	58.9019	0.678028	4.88689	18.9229	0.000514726	0.0160395	4.05084e-05	4.36595e-05	0.1	0.310247	0.134772	0.87831	0.767464	0.0213116	0.0748227		23.7051	22.7728	21.1748	47.277	31.1628	29.8311
ENSG00000121058	COIL	PC	coilin		The protein encoded by this gene is an integral component of Cajal bodies (also called coiled bodies). Cajal bodies are nuclear suborganelles of varying number and composition that are involved in the post-transcriptional modification of small nuclear and small nucleolar RNAs. The N-terminus of the coilin protein directs its self-oligomerization while the C-terminus influences the number of nucle…	GO:0001650 (fibrillar center), GO:0005634 (nucleus), GO:0005654 (nucleoplasm), GO:0005730 (nucleolus), GO:0015030 (Cajal body), GO:0016020 (membrane), GO:0016604 (nuclear body), GO:0005515 (protein binding), GO:0008022 (protein C-terminus binding), GO:0042802 (identical protein binding)		-0.303513	-0.212611	-0.106489		0.261734	0.253785	0.107094				214.12	65.511	56.6364	0.435994	5.29188	18.9054	0.000516866	0.0160395	7.17388e-05	7.68847e-05	0.1	0.310247	0.0055957	0.87831	0.940071	0.0213116	0.00527953		30.7633	32.8941	35.5576	46.4779	46.2116	41.5505
ENSG00000147604	RPL7	PC	ribosomal protein L7		Ribosomes, the organelles that catalyze protein synthesis, consist of a small 40S subunit and a large 60S subunit. Together these subunits are composed of 4 RNA species and approximately 80 structurally distinct proteins. This gene encodes a ribosomal protein that is a component of the 60S subunit. The protein belongs to the L30P family of ribosomal proteins. It contains an N-terminal basic regio…	hsa03010 (Ribosome), GO:0000184 (nuclear-transcribed mRNA catabolic process, nonsense-mediated decay), GO:0000463 (maturation of LSU-rRNA from tricistronic rRNA transcript (SSU-rRNA, 5.8S rRNA, LSU-rRNA)), GO:0002181 (cytoplasmic translation), GO:0006364 (rRNA processing), GO:0006412 (translation), GO:0006413 (translational initiation), GO:0006614 (SRP-dependent cotranslational protein targeting …		-0.0837704	-0.18543	-0.145231		0.254303	0.100667	0.0594616				214.038	99.5504	16.1954	0.278431	10.9129	18.895	0.000518149	0.0160395	0.00093572	0.000939904	0.1	0.310247	0.0377016	0.87831	0.889389	0.0213116	0.0176755		1808.51	1685.32	1733	2286.61	2055.42	1997.49
ENSG00000010017	RANBP9	PC	RAN binding protein 9		This gene encodes a protein that binds RAN, a small GTP binding protein belonging to the RAS superfamily that is essential for the translocation of RNA and proteins through the nuclear pore complex. The protein encoded by this gene has also been shown to interact with several other proteins, including met proto-oncogene, homeodomain interacting protein kinase 2, androgen receptor, and cyclin-depe…	GO:0000165 (MAPK cascade), GO:0006461 (protein complex assembly), GO:0007020 (microtubule nucleation), GO:0007411 (axon guidance), GO:0043547 (positive regulation of GTPase activity), GO:0070373 (negative regulation of ERK1 and ERK2 cascade), GO:0005634 (nucleus), GO:0005737 (cytoplasm), GO:0005829 (cytosol), GO:0005875 (microtubule associated complex), GO:0005886 (plasma membrane), GO:0005088 (R…		-0.102145	-0.188114	-0.311339		0.233218	0.0735011	0.294879				214.006	71.1655	69.6757	0.417488	5.66567	18.8908	0.000518656	0.0160395	6.62849e-05	6.84978e-05	0.1	0.310247	0.0146518	0.87831	0.911019	0.0213116	0.0115242		46.3447	43.5481	39.8192	58.9963	52.6039	61.6598
ENSG00000235333	PVRIG2P	transcribed_unprocessed_pseudogene	poliovirus receptor related immunoglobulin domain containing 2, pseudogene					0.300626	0.395084	0.267713		-0.710164	-0.246817	-0.00644103				213.63	57.4096	22.3433	-0.660042	4.80678	18.8429	0.000524591	0.0161798	3.36183e-05	3.64295e-05	0.1	0.310247	0.0505102	-0.87831	-0.880757	0.0213116	0.0204807		33.4268	35.824	32.6278	15.5814	22.2402	26.6349
ENSG00000064545	TMEM161A	PC	transmembrane protein 161A			GO:0032526 (response to retinoic acid), GO:0034599 (cellular response to oxidative stress), GO:0034644 (cellular response to UV), GO:0045739 (positive regulation of DNA repair), GO:1902230 (negative regulation of intrinsic apoptotic signaling pathway in response to DNA damage), GO:0016021 (integral component of membrane)		0.148291	0.257998	0.227977		-0.399715	-0.0830231	-0.151528				213.337	69.7043	30.5923	-0.435043	5.57184	18.8056	0.000529265	0.0162805	5.87833e-05	6.07534e-05	0.1	0.310247	0.0208506	-0.87831	-0.920119	0.0213116	0.00931667		51.9381	56.1997	55.0011	34.8917	43.9476	41.8168
ENSG00000110367	DDX6	PC	DEAD-box helicase 6		This gene encodes a member of the DEAD box protein family. The protein is an RNA helicase found in P-bodies and stress granules, and functions in translation suppression and mRNA degradation. It is required for microRNA-induced gene silencing. Multiple alternatively spliced variants, encoding the same protein, have been identified. [provided by RefSeq, Mar 2012].	hsa03018 (RNA degradation), GO:0006417 (regulation of translation), GO:0007283 (spermatogenesis), GO:0010501 (RNA secondary structure unwinding), GO:0019074 (viral RNA genome packaging), GO:0019827 (stem cell maintenance), GO:0033962 (cytoplasmic mRNA processing body assembly), GO:0043928 (exonucleolytic nuclear-transcribed mRNA catabolic process involved in deadenylation-dependent decay), GO:004…		-0.210327	-0.326832	-0.216559		0.501504	0.249074	0.00313898				213.244	62.6837	89.5288	0.546136	5.12022	18.7937	0.00053076	0.0162832	5.76189e-05	6.17418e-05	0.1	0.310247	0.0897712	0.87831	0.829761	0.0213116	0.0410053		28.8989	26.5017	28.7657	48.6087	40.4851	33.8263
ENSG00000122545	SEPT7	PC	septin 7		This gene encodes a protein that is highly similar to the CDC10 protein of Saccharomyces cerevisiae. The protein also shares similarity with Diff 6 of Drosophila and with H5 of mouse. Each of these similar proteins, including the yeast CDC10, contains a GTP-binding motif. The yeast CDC10 protein is a structural component of the 10 nm filament which lies inside the cytoplasmic membrane and is esse…	GO:0000910 (cytokinesis), GO:0007067 (mitotic nuclear division), GO:0007283 (spermatogenesis), GO:0016476 (regulation of embryonic cell shape), GO:0030154 (cell differentiation), GO:0051291 (protein heterooligomerization), GO:0060271 (cilium morphogenesis), GO:1902857 (positive regulation of nonmotile primary cilium assembly), GO:0000777 (condensed chromosome kinetochore), GO:0001725 (stress fibe…		0.00488476	-0.185673	-0.314405		0.128452	0.10669	0.260052				213.006	93.5501	58.6511	0.328497	7.88499	18.7633	0.000534617	0.0163529	9.56707e-05	9.68824e-05	0.1	0.310247	0.0383261	0.87831	0.853292	0.0213116	0.0307059		234.787	205.488	187.776	255.961	252.099	280.599
ENSG00000213676	ATF6B	PC	activating transcription factor 6 beta		The protein encoded by this gene is a transcription factor in the unfolded protein response (UPR) pathway during ER stress. Either as a homodimer or as a heterodimer with ATF6-alpha, the encoded protein binds to the ER stress response element, interacting with nuclear transcription factor Y to activate UPR target genes. The protein is normally found in the membrane of the endoplasmic reticulum; h…	hsa04022 (cGMP-PKG signaling pathway), hsa04141 (Protein processing in endoplasmic reticulum), hsa04151 (PI3K-Akt signaling pathway), hsa04211 (Longevity regulating pathway), hsa04261 (Adrenergic signaling in cardiomyocytes), hsa04668 (TNF signaling pathway), hsa04728 (Dopaminergic synapse), hsa04911 (Insulin secretion), hsa04915 (Estrogen signaling pathway), hsa04918 (Thyroid hormone synthesis),…		0.059609	0.210904	0.172258		-0.18101	-0.196099	-0.0656629				212.882	87.6016	31.6904	-0.29997	7.01867	18.7475	0.000536628	0.0163529	0.000103055	0.000105221	0.1	0.310247	0.0106695	-0.87831	-0.921537	0.0213116	0.00899308		134.107	149.156	145.16	113.198	112	122.787
ENSG00000147654	EBAG9	PC	estrogen receptor binding site associated, antigen, 9		This gene was identified as an estrogen-responsive gene. Regulation of transcription by estrogen is mediated by estrogen receptor, which binds to the estrogen-responsive element found in the 5_-flanking region of this gene. The encoded protein is a tumor-associated antigen that is expressed at high frequency in a variety of cancers. Alternate splicing results in multiple transcript variants. A ps…	hsa04915 (Estrogen signaling pathway), GO:0001558 (regulation of cell growth), GO:0006915 (apoptotic process), GO:0000139 (Golgi membrane), GO:0016021 (integral component of membrane), GO:0030141 (secretory granule), GO:0016505 (peptidase activator activity involved in apoptotic process)		-0.134374	-0.19022	-0.472327		0.336587	0.191169	0.269165				212.797	51.2277	34.3796	0.574608	4.44747	18.7366	0.000538017	0.0163529	6.26167e-05	6.9129e-05	0.1	0.310247	0.0100397	0.87831	0.937435	0.0213116	0.00574906		19.044	18.2449	14.6492	27.1676	24.3709	25.8359
ENSG00000122359	ANXA11	PC	annexin A11		This gene encodes a member of the annexin family, a group of calcium-dependent phospholipid-binding proteins. Annexins have unique N-terminal domains and conserved C-terminal domains, which contain the calcium-dependent phospholipid-binding sites. The encoded protein is a 56-kD antigen recognized by sera from patients with various autoimmune diseases. Several transcript variants encoding two diff…	GO:0006909 (phagocytosis), GO:0032506 (cytokinetic process), GO:0051592 (response to calcium ion), GO:0005635 (nuclear envelope), GO:0005654 (nucleoplasm), GO:0005737 (cytoplasm), GO:0005819 (spindle), GO:0005829 (cytosol), GO:0016020 (membrane), GO:0030496 (midbody), GO:0042470 (melanosome), GO:0042581 (specific granule), GO:0042582 (azurophil granule), GO:0045335 (phagocytic vesicle), GO:007006…		-0.110093	-0.152679	-0.145246		0.108363	0.213854	0.0858009				212.756	88.6651	79.5071	0.276815	7.15254	18.7314	0.000538688	0.0163529	0.000125258	0.000127857	0.1	0.310247	0.0189461	0.87831	0.948825	0.0213116	0.00386136		130.777	126.915	127.581	152.485	164.204	150.088
ENSG00000143742	SRP9	PC	signal recognition particle 9			hsa03060 (Protein export), GO:0006614 (SRP-dependent cotranslational protein targeting to membrane), GO:0006616 (SRP-dependent cotranslational protein targeting to membrane, translocation), GO:0045900 (negative regulation of translational elongation), GO:0005785 (signal recognition particle receptor complex), GO:0005786 (signal recognition particle, endoplasmic reticulum targeting), GO:0005829 (c…		-0.522127	-0.348689	-0.110299		0.74929	0.258607	-0.0267809				212.179	67.8195	16.1781	0.712697	5.44674	18.6581	0.0005482	0.0165981	3.01906e-05	3.20076e-05	0.1	0.310247	0.133963	0.87831	0.743625	0.0213116	0.0901665		28.233	32.0951	38.2211	70.982	49.9405	40.6182
ENSG00000099917	MED15	PC	mediator complex subunit 15		The protein encoded by this gene is a subunit of the multiprotein complexes PC2 and ARC/DRIP and may function as a transcriptional coactivator in RNA polymerase II transcription. This gene contains stretches of trinucleotide repeats and is located in the chromosome 22 region which is deleted in DiGeorge syndrome. Alternative splicing results in multiple transcript variants. [provided by RefSeq, J…	GO:0006357 (regulation of transcription from RNA polymerase II promoter), GO:0006367 (transcription initiation from RNA polymerase II promoter), GO:0005634 (nucleus), GO:0005654 (nucleoplasm), GO:0005737 (cytoplasm), GO:0016020 (membrane), GO:0016592 (mediator complex), GO:0001104 (RNA polymerase II transcription cofactor activity), GO:0005515 (protein binding), R-HSA-1266738 (Homo sapiens: Devel…		0.0492348	0.232957	0.144018		-0.20937	-0.0941098	-0.12273				211.762	89.8669	47.5054	-0.288862	7.30753	18.605	0.000555199	0.0167662	0.000121058	0.000123265	0.1	0.310247	0.0222078	-0.87831	-0.907265	0.0213116	0.0125009		162.739	185.113	173.926	135.705	147.158	144.228
ENSG00000135720	DYNC1LI2	PC	dynein cytoplasmic 1 light intermediate chain 2		Cytoplasmic dynein is a microtubule-associated motor protein (Hughes et al., 1995 [PubMed 7738094]). See DYNC1H1 (MIM 600112) for general information about dyneins.[supplied by OMIM, Mar 2008].	hsa04145 (Phagosome), hsa04962 (Vasopressin-regulated water reabsorption), hsa05132 (Salmonella infection), GO:0000226 (microtubule cytoskeleton organization), GO:0006888 (ER to Golgi vesicle-mediated transport), GO:0007018 (microtubule-based movement), GO:0019886 (antigen processing and presentation of exogenous peptide antigen via MHC class II), GO:0051642 (centrosome localization), GO:0005813 …		-0.125574	-0.318801	-0.208034		0.505222	0.128177	0.0190085				211.244	84.2383	33.5063	0.457048	6.67416	18.5392	0.000564022	0.0169882	5.37417e-05	5.47375e-05	0.1	0.310247	0.119127	0.87831	0.773412	0.0213116	0.0711962		91.4909	79.7716	86.2971	142.763	109.469	101.346
ENSG00000073670	ADAM11	PC	ADAM metallopeptidase domain 11		This gene encodes a member of the ADAM (a disintegrin and metalloprotease) protein family. Members of this family are membrane-anchored proteins structurally related to snake venom disintegrins, and have been implicated in a variety of biological processes involving cell-cell and cell-matrix interactions, including fertilization, muscle development, and neurogenesis. This gene represents a candid…	GO:0006508 (proteolysis), GO:0007229 (integrin-mediated signaling pathway), GO:0005886 (plasma membrane), GO:0016021 (integral component of membrane), GO:0031012 (extracellular matrix), GO:0004222 (metalloendopeptidase activity), GO:0005178 (integrin binding), GO:0008237 (metallopeptidase activity), R-HSA-1266738 (Homo sapiens: Developmental Biology), R-HSA-5682910 (Homo sapiens: LGI-ADAM interac…		0.468673	0.30523	0.389265		-0.293966	-0.530866	-0.338336				210.897	6.69203	89.6066	-1.24144	1.94937	18.495	0.000570024	0.0171244	2.28973e-05	3.17097e-05	0.1	0.310247	0.000730512	-0.87831	-0.978664	0.0213116	0.000677968		5.46016	4.66111	5.06063	2.39714	1.73127	2.26397
ENSG00000182871	COL18A1	PC	collagen type XVIII alpha 1 chain		This gene encodes the alpha chain of type XVIII collagen. This collagen is one of the multiplexins, extracellular matrix proteins that contain multiple triple-helix domains (collagenous domains) interrupted by non-collagenous domains. A long isoform of the protein has an N-terminal domain that is homologous to the extracellular part of frizzled receptors. Proteolytic processing at several endogen…	hsa04974 (Protein digestion and absorption), GO:0001525 (angiogenesis), GO:0001886 (endothelial cell morphogenesis), GO:0007155 (cell adhesion), GO:0007601 (visual perception), GO:0008284 (positive regulation of cell proliferation), GO:0008285 (negative regulation of cell proliferation), GO:0009887 (organ morphogenesis), GO:0030198 (extracellular matrix organization), GO:0030335 (positive regulat…		0.394838	0.301482	-0.00146605		-0.26746	-0.141938	-0.285455				210.678	64.6723	94.2412	-0.496931	5.23775	18.4673	0.000573829	0.0171941	7.01716e-05	7.49887e-05	0.1	0.310247	0.0638093	-0.87831	-0.85862	0.0213116	0.0285697		49.0082	45.812	36.7562	30.2306	33.1605	29.8311
ENSG00000119326	CTNNAL1	PC	catenin alpha like 1			GO:0007155 (cell adhesion), GO:0007266 (Rho protein signal transduction), GO:0005829 (cytosol), GO:0005856 (cytoskeleton), GO:0005886 (plasma membrane), GO:0005515 (protein binding), GO:0045296 (cadherin binding), GO:0051015 (actin filament binding)		-0.0900892	-0.182922	-0.0731374		0.147575	0.121038	0.0775364				210.275	96.4724	50.5837	0.231414	8.62739	18.4162	0.00058093	0.0173611	0.000276364	0.000279062	0.1	0.310247	0.00528297	0.87831	0.949292	0.0213116	0.00379175		369.826	346.653	374.22	436.413	428.423	415.638
ENSG00000039650	PNKP	PC	polynucleotide kinase 3'-phosphatase		This locus represents a gene involved in DNA repair. In response to ionizing radiation or oxidative damage, the protein encoded by this locus catalyzes 5_ phosphorylation and 3_ dephosphorylation of nucleic acids. Mutations at this locus have been associated with microcephaly, seizures, and developmental delay.[provided by RefSeq, Sep 2010]. Publication Note: This RefSeq record includes a subset …	GO:0000718 (nucleotide-excision repair, DNA damage removal), GO:0006261 (DNA-dependent DNA replication), GO:0006281 (DNA repair), GO:0006979 (response to oxidative stress), GO:0009314 (response to radiation), GO:0016311 (dephosphorylation), GO:0032212 (positive regulation of telomere maintenance via telomerase), GO:0042769 (DNA damage response, detection of DNA damage), GO:0046939 (nucleotide pho…		0.188322	0.300019	0.170143		-0.478924	-0.0991684	-0.0803919				210.192	76.0332	14.3623	-0.442247	6.01373	18.4056	0.000582406	0.0173611	5.6981e-05	5.84425e-05	0.1	0.310247	0.0394473	-0.87831	-0.879071	0.0213116	0.0210517		72.447	78.4398	71.5147	44.8798	58.9963	59.7954
ENSG00000148700	ADD3	PC	adducin 3		Adducins are heteromeric proteins composed of different subunits referred to as adducin alpha, beta and gamma. The three subunits are encoded by distinct genes and belong to a family of membrane skeletal proteins involved in the assembly of spectrin-actin network in erythrocytes and at sites of cell-cell contact in epithelial tissues. While adducins alpha and gamma are ubiquitously expressed, the…	GO:0007010 (cytoskeleton organization), GO:0055085 (transmembrane transport), GO:0000794 (condensed nuclear chromosome), GO:0005654 (nucleoplasm), GO:0005829 (cytosol), GO:0005856 (cytoskeleton), GO:0005886 (plasma membrane), GO:0005903 (brush border), GO:0005911 (cell-cell junction), GO:0005938 (cell cortex), GO:0014069 (postsynaptic density), GO:0016020 (membrane), GO:0003779 (actin binding), G…		-0.421949	-0.253038	-0.138185		0.532458	0.207079	0.0736355				209.921	57.1416	22.1876	0.591406	4.79183	18.3713	0.000587252	0.0174327	6.84239e-05	7.40543e-05	0.1	0.310247	0.0665833	0.87831	0.835397	0.0213116	0.0384115		19.4435	22.107	24.1046	39.5528	31.1628	28.233
ENSG00000196642	RABL6	PC	RAB, member RAS oncogene family like 6		This gene encodes a member of the Ras superfamily of small GTPases. The encoded protein binds to both GTP and GDP and may play a role in cell growth and survival. Overexpression of this gene may play a role in breast cancer tumorigenesis, and pseudogenes of this gene are located on the long arm of chromosome 2 and the short arm of chromosome 18. Alternatively spliced transcript variants encoding …	GO:0005634 (nucleus), GO:0005737 (cytoplasm), GO:0003924 (GTPase activity), GO:0005515 (protein binding), GO:0005525 (GTP binding)		0.0489715	0.188112	0.185654		-0.249476	-0.0762301	-0.0970312				209.889	92.478	83.9689	-0.283968	7.68276	18.3672	0.000587822	0.0174327	0.000141516	0.000143621	0.1	0.310247	0.0155591	-0.87831	-0.896413	0.0213116	0.0155397		211.082	232.656	232.256	171.262	193.369	190.573
ENSG00000114503	NCBP2	PC	nuclear cap binding protein subunit 2		The product of this gene is a component of the nuclear cap-binding protein complex (CBC), which binds to the monomethylated 5_ cap of nascent pre-mRNA in the nucleoplasm. The encoded protein has an RNP domain commonly found in RNA binding proteins, and contains the cap-binding activity. The CBC promotes pre-mRNA splicing, 3_-end processing, RNA nuclear export, and nonsense-mediated mRNA decay. Mu…	hsa03013 (RNA transport), hsa03015 (mRNA surveillance pathway), hsa03040 (Spliceosome), GO:0000184 (nuclear-transcribed mRNA catabolic process, nonsense-mediated decay), GO:0000398 (mRNA splicing, via spliceosome), GO:0006366 (transcription from RNA polymerase II promoter), GO:0006368 (transcription elongation from RNA polymerase II promoter), GO:0006369 (termination of RNA polymerase II transcri…		-0.219184	-0.0947803	-0.232688		0.181199	0.160687	0.204766				209.74	70.249	50.428	0.378263	5.60314	18.3484	0.000590494	0.0174546	0.000100377	0.000104314	0.1	0.310247	0.00595747	0.87831	0.974617	0.0213116	0.000958298		40.8846	44.7467	40.4851	54.6016	53.8025	55.5338
ENSG00000168542	COL3A1	PC	collagen type III alpha 1 chain		This gene encodes the pro-alpha1 chains of type III collagen, a fibrillar collagen that is found in extensible connective tissues such as skin, lung, uterus, intestine and the vascular system, frequently in association with type I collagen. Mutations in this gene are associated with Ehlers-Danlos syndrome types IV, and with aortic and arterial aneurysms. Two transcripts, resulting from the use of…	hsa04611 (Platelet activation), hsa04926 (Relaxin signaling pathway), hsa04933 (AGE-RAGE signaling pathway in diabetic complications), hsa04974 (Protein digestion and absorption), hsa05146 (Amoebiasis), GO:0001501 (skeletal system development), GO:0007160 (cell-matrix adhesion), GO:0007179 (transforming growth factor beta receptor signaling pathway), GO:0007229 (integrin-mediated signaling pathwa…		-0.317929	-0.458509	-0.0722017		0.42923	0.327508	0.091901				209.681	51.4958	76.0398	0.616348	4.46498	18.3408	0.000591577	0.0174546	6.88246e-05	7.55713e-05	0.1	0.310247	0.0219085	0.87831	0.882066	0.0213116	0.0200426		16.6468	14.9156	20.1094	29.2984	27.1676	22.7728
ENSG00000077254	USP33	PC	ubiquitin specific peptidase 33		This gene encodes a deubiquinating enzyme important in a variety of processes, including Slit-dependent cell migration and beta-2 adrenergic receptor signaling. The protein is negatively regulated through ubiquitination by von Hippel-Lindau tumor protein (VHL). Alternative splicing results in multiple transcript variants and protein isoforms. [provided by RefSeq, Jun 2012].	GO:0006511 (ubiquitin-dependent protein catabolic process), GO:0006897 (endocytosis), GO:0007411 (axon guidance), GO:0008277 (regulation of G-protein coupled receptor protein signaling pathway), GO:0009267 (cellular response to starvation), GO:0010506 (regulation of autophagy), GO:0016477 (cell migration), GO:0016579 (protein deubiquitination), GO:0032091 (negative regulation of protein binding),…		-0.526979	-0.188625	-0.175571		0.35187	0.36979	0.169515				209.214	42.1235	52.5292	0.667678	3.94314	18.2818	0.000600074	0.0176167	7.42341e-05	8.37714e-05	0.1	0.310247	0.00790894	0.87831	0.92881	0.0213116	0.00742162		9.58857	12.6516	12.7848	19.3103	19.5767	16.78
ENSG00000144724	PTPRG	PC	protein tyrosine phosphatase, receptor type G		The protein encoded by this gene is a member of the protein tyrosine phosphatase (PTP) family. PTPs are known to be signaling molecules that regulate a variety of cellular processes including cell growth, differentiation, mitotic cycle, and oncogenic transformation. This PTP possesses an extracellular region, a single transmembrane region, and two tandem intracytoplasmic catalytic domains, and th…	GO:0007169 (transmembrane receptor protein tyrosine kinase signaling pathway), GO:0007420 (brain development), GO:0010633 (negative regulation of epithelial cell migration), GO:0010977 (negative regulation of neuron projection development), GO:0035335 (peptidyl-tyrosine dephosphorylation), GO:0005615 (extracellular space), GO:0005887 (integral component of plasma membrane), GO:0070062 (extracellu…		-0.379669	-0.479164	-0.286596		0.682768	0.357067	0.105594				209.171	19.6957	93.0307	1.05193	2.68135	18.2764	0.000600858	0.0176167	5.28099e-05	6.52714e-05	0.1	0.310247	0.065038	0.87831	0.86937	0.0213116	0.0244819		3.99524	3.59571	4.39476	10.5208	7.99047	6.39238
ENSG00000204388	HSPA1B	PC	heat shock protein family A (Hsp70) member 1B		This intronless gene encodes a 70kDa heat shock protein which is a member of the heat shock protein 70 family. In conjuction with other heat shock proteins, this protein stabilizes existing proteins against aggregation and mediates the folding of newly translated proteins in the cytosol and in organelles. It is also involved in the ubiquitin-proteasome pathway through interaction with the AU-rich…	hsa03040 (Spliceosome), hsa04010 (MAPK signaling pathway), hsa04141 (Protein processing in endoplasmic reticulum), hsa04144 (Endocytosis), hsa04213 (Longevity regulating pathway - multiple species), hsa04612 (Antigen processing and presentation), hsa04915 (Estrogen signaling pathway), hsa05134 (Legionellosis), hsa05145 (Toxoplasmosis), hsa05162 (Measles), hsa05164 (Influenza A), GO:0006402 (mRNA …		-0.0399082	0.296949	0.182936		-0.14171	-0.139443	-0.158824				209.129	97.6915	84.0899	-0.30105	9.13766	18.271	0.000601643	0.0176167	0.000213951	0.000215585	0.1	0.310247	0.107436	-0.87831	-0.81273	0.0213116	0.0493213		543.352	686.781	634.444	506.196	506.996	500.204
ENSG00000170312	CDK1	PC	cyclin dependent kinase 1		The protein encoded by this gene is a member of the Ser/Thr protein kinase family. This protein is a catalytic subunit of the highly conserved protein kinase complex known as M-phase promoting factor (MPF), which is essential for G1/S and G2/M phase transitions of eukaryotic cell cycle. Mitotic cyclins stably associate with this protein and function as regulatory subunits. The kinase activity of …	hsa04110 (Cell cycle), hsa04114 (Oocyte meiosis), hsa04115 (p53 signaling pathway), hsa04218 (Cellular senescence), hsa04540 (Gap junction), hsa04914 (Progesterone-mediated oocyte maturation), hsa05168 (Herpes simplex infection), hsa05170 (Human immunodeficiency virus 1 infection), hsa05203 (Viral carcinogenesis), GO:0000082 (G1/S transition of mitotic cell cycle), GO:0000083 (regulation of trans…		-0.43155	-0.325691	-0.170981		0.63283	0.430155	-0.134763				208.849	62.9258	47.1336	0.688211	5.13122	18.2355	0.000606819	0.0176717	4.46707e-05	4.77086e-05	0.1	0.310247	0.128684	0.87831	0.765453	0.0213116	0.0760672		24.2378	26.2354	29.4316	52.8703	45.6789	30.2306
ENSG00000038210	PI4K2B	PC	phosphatidylinositol 4-kinase type 2 beta		Phosphatidylinositol 4-kinases (PI4Ks) phosphorylate phosphatidylinositol to generate phosphatidylinositol 4-phosphate (PIP), an immediate precursor of several important signaling and scaffolding molecules. PIP itself may also have direct functional and structural roles. PI4K2B is a primarily cytosolic PI4K that is recruited to membranes, where it stimulates phosphatidylinositol 4,5-bisphosphate …	hsa00562 (Inositol phosphate metabolism), hsa01100 (Metabolic pathways), hsa04070 (Phosphatidylinositol signaling system), GO:0006661 (phosphatidylinositol biosynthetic process), GO:0007030 (Golgi organization), GO:0007032 (endosome organization), GO:0046854 (phosphatidylinositol phosphorylation), GO:0005768 (endosome), GO:0005802 (trans-Golgi network), GO:0005829 (cytosol), GO:0005886 (plasma me…		-0.132559	-0.282724	-0.177122		0.20788	0.225105	0.159421				208.78	64.2227	93.8694	0.415355	5.2112	18.2269	0.000608095	0.0176717	0.000107603	0.000115654	0.1	0.310247	0.00227355	0.87831	0.97554	0.0213116	0.000890123		33.0273	29.5648	31.9619	42.3495	42.8822	40.8846
ENSG00000104853	CLPTM1	PC	CLPTM1, transmembrane protein			GO:0007275 (multicellular organismal development), GO:0030154 (cell differentiation), GO:0033081 (regulation of T cell differentiation in thymus), GO:0005887 (integral component of plasma membrane), GO:0009897 (external side of plasma membrane), GO:0016020 (membrane), GO:0005515 (protein binding)		0.109226	0.342007	0.139674		-0.45125	-0.0965625	-0.0430938				208.78	93.9997	38.1323	-0.389757	7.96982	18.2268	0.000608103	0.0176717	8.69045e-05	8.79556e-05	0.1	0.310247	0.0498975	-0.87831	-0.816953	0.0213116	0.0471928		266.482	313.493	272.209	180.052	230.792	239.581
ENSG00000149925	ALDOA	PC	aldolase, fructose-bisphosphate A		The protein encoded by this gene, Aldolase A (fructose-bisphosphate aldolase), is a glycolytic enzyme that catalyzes the reversible conversion of fructose-1,6-bisphosphate to glyceraldehyde 3-phosphate and dihydroxyacetone phosphate. Three aldolase isozymes (A, B, and C), encoded by three different genes, are differentially expressed during development. Aldolase A is found in the developing embry…	hsa00010 (Glycolysis / Gluconeogenesis), hsa00030 (Pentose phosphate pathway), hsa00051 (Fructose and mannose metabolism), hsa01100 (Metabolic pathways), hsa01200 (Carbon metabolism), hsa01230 (Biosynthesis of amino acids), hsa04066 (HIF-1 signaling pathway), GO:0002576 (platelet degranulation), GO:0006000 (fructose metabolic process), GO:0006094 (gluconeogenesis), GO:0006096 (glycolytic process)…		0.0723463	0.245371	0.114793		-0.258839	-0.110228	-0.063444				208.523	99.585	34.0337	-0.288141	10.9846	18.1943	0.000612905	0.017711	0.00100539	0.00101004	0.1	0.310247	0.0216533	-0.87831	-0.878518	0.0213116	0.0212405		2116.54	2386.49	2179.8	1681.99	1864.71	1926.24
ENSG00000130005	GAMT	PC	guanidinoacetate N-methyltransferase		The protein encoded by this gene is a methyltransferase that converts guanidoacetate to creatine, using S-adenosylmethionine as the methyl donor. Defects in this gene have been implicated in neurologic syndromes and muscular hypotonia, probably due to creatine deficiency and accumulation of guanidinoacetate in the brain of affected individuals. Two transcript variants encoding different isoforms …	hsa00260 (Glycine, serine and threonine metabolism), hsa00330 (Arginine and proline metabolism), hsa01100 (Metabolic pathways), GO:0006600 (creatine metabolic process), GO:0006601 (creatine biosynthetic process), GO:0006936 (muscle contraction), GO:0007283 (spermatogenesis), GO:0009887 (organ morphogenesis), GO:0032259 (methylation), GO:0040014 (regulation of multicellular organism growth), GO:00…		0.213587	0.263338	0.068758		-0.261732	-0.11679	-0.167161				208.397	73.8371	18.6684	-0.377612	5.85128	18.1784	0.000615273	0.017711	0.00010042	0.000103786	0.1	0.310247	0.0144405	-0.87831	-0.925179	0.0213116	0.00818795		66.3209	68.7181	59.7954	47.1438	52.3376	50.4732
ENSG00000259784	AC093525.1	PC						0.068737	0.300334	0.35442		-0.486058	-0.166388	-0.0710453				208.394	69.5573	6.50238	-0.497389	5.56442	18.1781	0.000615325	0.017711	5.95518e-05	6.29816e-05	0.1	0.310247	0.028882	-0.87831	-0.857868	0.0213116	0.0288666		48.4755	57.2651	59.529	32.3614	40.8846	43.8144
ENSG00000102409	BEX4	PC	brain expressed X-linked 4		This gene is a member of the brain expressed X-linked gene family. The proteins encoded by some of the other members of this family act as transcription elongation factors which allow RNA polymerase II to escape pausing during elongation. Multiple alternatively spliced variants, encoding the same protein, have been identified. [provided by RefSeq, Aug 2011].	GO:0005634 (nucleus), GO:0005737 (cytoplasm)		-0.121569	-0.286623	-0.0939845		0.15853	0.205908	0.137739				208.381	78.8345	36.2732	0.341634	6.2073	18.1764	0.000615582	0.017711	0.000100878	0.00010392	0.1	0.310247	0.0131067	0.87831	0.945789	0.0213116	0.00432858		66.9868	59.529	68.3185	81.7692	84.5658	80.5706
ENSG00000189266	PNRC2	PC	proline rich nuclear receptor coactivator 2			GO:0000184 (nuclear-transcribed mRNA catabolic process, nonsense-mediated decay), GO:0006351 (transcription, DNA-templated), GO:0006355 (regulation of transcription, DNA-templated), GO:0031087 (deadenylation-independent decapping of nuclear-transcribed mRNA), GO:0000932 (cytoplasmic mRNA processing body), GO:0005634 (nucleus), GO:0005654 (nucleoplasm), GO:0005794 (Golgi apparatus), GO:0005829 (cy…		-0.192999	-0.259489	-0.232525		0.297953	0.374491	0.0125693				208.087	61.2139	20.4669	0.493659	5.02705	18.1393	0.000621147	0.0178268	9.25424e-05	9.95924e-05	0.1	0.310247	0.0625001	0.87831	0.879784	0.0213116	0.0208092		27.5671	26.2354	26.7681	39.5528	41.8168	32.0951
ENSG00000137955	RABGGTB	PC	Rab geranylgeranyltransferase subunit beta		This gene encodes the beta-subunit of the enzyme Rab geranylgeranyl-transferase (RabGGTase), which belongs to the protein prenyltransferase family. RabGGTase catalyzes the post-translational addition of geranylgeranyl groups to C-terminal cysteine residues of Rab GTPases. Three small nucleolar RNA genes are present in the intronic regions of this gene. Alternately spliced transcript variants have…	GO:0006464 (cellular protein modification process), GO:0007601 (visual perception), GO:0018344 (protein geranylgeranylation), GO:0042981 (regulation of apoptotic process), GO:0005829 (cytosol), GO:0005886 (plasma membrane), GO:0005968 (Rab-protein geranylgeranyltransferase complex), GO:0004663 (Rab geranylgeranyltransferase activity), GO:0005515 (protein binding), GO:0008270 (zinc ion binding), G…		-0.231951	-0.199712	-0.108598		0.407911	0.0297192	0.10263				207.875	88.4057	37.968	0.374076	7.11191	18.1125	0.000625201	0.0178987	9.38268e-05	9.54213e-05	0.1	0.310247	0.105179	0.87831	0.797987	0.0213116	0.0570921		115.862	118.525	126.383	181.65	139.301	146.625
ENSG00000136521	NDUFB5	PC	NADH:ubiquinone oxidoreductase subunit B5		The protein encoded by this gene is a subunit of the multisubunit NADH:ubiquinone oxidoreductase (complex I). Mammalian complex I is composed of 45 different subunits. It locates at the mitochondrial inner membrane. This protein has NADH dehydrogenase activity and oxidoreductase activity. It transfers electrons from NADH to the respiratory chain. The immediate electron acceptor for the enzyme is …	hsa00190 (Oxidative phosphorylation), hsa01100 (Metabolic pathways), hsa04714 (Thermogenesis), hsa04723 (Retrograde endocannabinoid signaling), hsa04932 (Non-alcoholic fatty liver disease (NAFLD)), hsa05010 (Alzheimer disease), hsa05012 (Parkinson disease), hsa05016 (Huntington disease), GO:0006120 (mitochondrial electron transport, NADH to ubiquinone), GO:0032981 (mitochondrial respiratory chain…		-0.105615	-0.209041	-0.130784		0.162696	0.177685	0.105059				207.705	82.2583	20.8387	0.303239	6.49049	18.091	0.000628481	0.0179085	0.000133796	0.000137598	0.1	0.310247	0.00140653	0.87831	0.970334	0.0213116	0.00130705		82.7014	76.8417	81.2365	100.014	101.079	96.0189
ENSG00000153140	CETN3	PC	centrin 3		The protein encoded by this gene contains four EF-hand calcium binding domains, and is a member of the centrin protein family. Centrins are evolutionarily conserved proteins similar to the CDC31 protein of S. cerevisiae. Yeast CDC31 is located at the centrosome of interphase and mitotic cells, where it plays a fundamental role in centrosome duplication and separation. Multiple forms of the protei…	GO:0007067 (mitotic nuclear division), GO:0007098 (centrosome cycle), GO:0051301 (cell division), GO:0005730 (nucleolus), GO:0005813 (centrosome), GO:0005814 (centriole), GO:0005509 (calcium ion binding), GO:0005515 (protein binding)		-0.128246	-0.269415	-0.216469		0.372793	0.211488	0.0298493				207.696	71.0358	27.0558	0.431648	5.65744	18.0899	0.000628639	0.0179085	8.97818e-05	9.26652e-05	0.1	0.310247	0.056214	0.87831	0.867687	0.0213116	0.0251019		45.1462	40.7514	42.3495	64.7228	57.6646	50.6063
ENSG00000111832	RWDD1	PC	RWD domain containing 1			GO:0002181 (cytoplasmic translation), GO:0007569 (cell aging), GO:0030521 (androgen receptor signaling pathway), GO:0034599 (cellular response to oxidative stress), GO:0071394 (cellular response to testosterone stimulus), GO:2000825 (positive regulation of androgen receptor activity), GO:0005737 (cytoplasm), GO:0005844 (polysome), GO:0005515 (protein binding)		-0.188083	-0.219631	-0.152519		0.415152	0.074544	0.0705367				207.555	82.4226	56.5499	0.390995	6.50078	18.0721	0.000631376	0.0179423	9.12652e-05	9.32973e-05	0.1	0.310247	0.102658	0.87831	0.8154	0.0213116	0.0479702		78.0403	76.309	80.0379	119.591	94.0212	93.7549
ENSG00000267426	AC087289.3	PC						0.15009	0.227565	0.205395		-0.352662	-0.143093	-0.0872943				207.457	71.3038	79.0834	-0.399829	5.67322	18.0597	0.000633278	0.0179522	9.19627e-05	9.51839e-05	0.1	0.310247	0.019905	-0.87831	-0.934011	0.0213116	0.00638813		55.9333	59.1295	58.1973	38.887	45.2793	47.1438
ENSG00000102172	SMS	PC	spermine synthase		This gene encodes a protein belonging to the spermidine/spermin synthase family. Pseudogenes of this gene are located on chromosomes 1, 5, 6 and X. Mutations in this gene are associated with X-linked Snyder-Robinson mental retardation syndrome. Multiple transcript variants encoding different isoforms have been found for this gene. [provided by RefSeq, May 2012].	hsa00270 (Cysteine and methionine metabolism), hsa00330 (Arginine and proline metabolism), hsa00410 (beta-Alanine metabolism), hsa00480 (Glutathione metabolism), hsa01100 (Metabolic pathways), GO:0006555 (methionine metabolic process), GO:0006595 (polyamine metabolic process), GO:0006597 (spermine biosynthetic process), GO:0005829 (cytosol), GO:0070062 (extracellular vesicular exosome), GO:001676…		-0.14734	-0.14311	-0.100456		0.272629	0.0481254	0.0701516				207.115	97.8385	30.5837	0.264912	9.23934	18.0166	0.000639964	0.0180974	0.000347058	0.0003495	0.1	0.310247	0.0767474	0.87831	0.852015	0.0213116	0.0312287		542.287	543.885	560.265	726.201	621.259	630.848
ENSG00000107443	CCNJ	PC	cyclin J			GO:0005634 (nucleus)		-0.479103	-0.428509	-0.242203		0.441028	0.441028	0.267759				206.954	5.47294	91.7769	1.25606	1.87275	17.8082	0.000673418	0.0184568	3.1087e-05	4.32727e-05	0.0765225	0.310247	0.00150118	0.891133	0.972458	0.017133	0.00112736		1.73127	1.86444	2.39714	5.06063	5.06063	4.26159
ENSG00000155438	NIFK	PC	nucleolar protein interacting with the FHA domain of MKI67		This gene encodes a protein that interacts with the forkhead-associated domain of the Ki-67 antigen. The encoded protein may bind RNA and may play a role in mitosis and cell cycle progression. Multiple pseudogenes exist on chromosomes 5, 10, 12, 15, and 19.[provided by RefSeq, Jan 2009].	GO:0006461 (protein complex assembly), GO:0009303 (rRNA transcription), GO:0010923 (negative regulation of phosphatase activity), GO:0016072 (rRNA metabolic process), GO:0000794 (condensed nuclear chromosome), GO:0005654 (nucleoplasm), GO:0005730 (nucleolus), GO:0005737 (cytoplasm), GO:0003723 (RNA binding), GO:0005515 (protein binding)		-0.194762	-0.163513	-0.226703		0.254075	0.261769	0.0691339				206.654	66.2805	14.8119	0.412077	5.33853	17.9585	0.000649105	0.0183111	0.00011972	0.000127924	0.1	0.310247	0.0258509	0.87831	0.9387	0.0213116	0.00552128		34.4922	35.2913	33.6932	47.8097	48.076	41.8168
ENSG00000116455	WDR77	PC	WD repeat domain 77		WDR77 is a component of the 20S PRMT5 (MIM 604045)-containing methyltransferase complex, which modifies specific arginines to dimethylarginines in several spliceosomal Sm proteins (see MIM 601061). This modification targets Sm proteins to the survival of motor neurons (SMN) complex (see MIM 600354) for assembly into small nuclear ribonucleoprotein core particles (Friesen et al., 2002 [PubMed 1175…	GO:0000387 (spliceosomal snRNP assembly), GO:0006357 (regulation of transcription from RNA polymerase II promoter), GO:0008284 (positive regulation of cell proliferation), GO:0035246 (peptidyl-arginine N-methylation), GO:0060528 (secretory columnal luminar epithelial cell differentiation involved in prostate glandular acinus development), GO:0060770 (negative regulation of epithelial cell prolife…		-0.132483	-0.343792	-0.101233		0.287795	0.201318	0.0883956				206.501	74.2694	36.5932	0.396472	5.88092	17.9392	0.000652171	0.0183528	9.52585e-05	9.82241e-05	0.1	0.310247	0.0140955	0.87831	0.901439	0.0213116	0.0140928		52.7371	45.2793	53.9357	71.2484	66.9868	61.793
ENSG00000065154	OAT	PC	ornithine aminotransferase		This gene encodes the mitochondrial enzyme ornithine aminotransferase, which is a key enzyme in the pathway that converts arginine and ornithine into the major excitatory and inhibitory neurotransmitters glutamate and GABA. Mutations that result in a deficiency of this enzyme cause the autosomal recessive eye disease Gyrate Atrophy. Alternatively spliced transcript variants encoding different iso…	hsa00330 (Arginine and proline metabolism), hsa01100 (Metabolic pathways), GO:0007601 (visual perception), GO:0008652 (cellular amino acid biosynthetic process), GO:0034214 (protein hexamerization), GO:0055129 (L-proline biosynthetic process), GO:0005654 (nucleoplasm), GO:0005739 (mitochondrion), GO:0005759 (mitochondrial matrix), GO:0004587 (ornithine-oxo-acid transaminase activity), GO:0030170 …		-0.137571	-0.096404	-0.390001		0.345122	0.115929	0.162925				206.387	72.9033	22.9053	0.428986	5.77321	17.9249	0.00065445	0.0183723	8.44054e-05	8.69608e-05	0.1	0.310247	0.0212731	0.87831	0.878879	0.0213116	0.021117		48.6087	50.0736	40.4851	68.7181	58.3305	60.3281
ENSG00000127054	INTS11	PC	integrator complex subunit 11		The Integrator complex contains at least 12 subunits and associates with the C-terminal domain of RNA polymerase II large subunit (POLR2A; MIM 180660) and mediates the 3-prime end processing of small nuclear RNAs U1 (RNU1; MIM 180680) and U2 (RNU2; MIM 180690). INTS11, or CPSF3L, is the catalytic subunit of the Integrator complex (Baillat et al., 2005 [PubMed 16239144]).[supplied by OMIM, Mar 200…	GO:0016180 (snRNA processing), GO:0042795 (snRNA transcription from RNA polymerase II promoter), GO:0005654 (nucleoplasm), GO:0005829 (cytosol), GO:0032039 (integrator complex), GO:0072562 (blood microparticle), GO:0005515 (protein binding), GO:0016787 (hydrolase activity), R-HSA-6807505 (Homo sapiens: RNA polymerase II transcribes snRNA genes), R-HSA-74160 (Homo sapiens: Gene Expression)		0.0665618	0.272007	0.169948		-0.283496	-0.0918823	-0.133138				206.235	81.1949	39.9395	-0.347176	6.40238	17.9057	0.000657523	0.0184138	0.000110915	0.000113825	0.1	0.310247	0.0176382	-0.87831	-0.896794	0.0213116	0.0154275		87.6289	101.346	94.2876	68.3185	78.3066	76.0427
ENSG00000145632	PLK2	PC	polo like kinase 2		The protein encoded by this gene is a member of the polo family of serine/threonine protein kinases that have a role in normal cell division. This gene is most abundantly expressed in testis, spleen and fetal tissues, and its expression is inducible by serum, suggesting that it may also play an important role in cells undergoing rapid cell division. Alternatively spliced transcript variants encod…	hsa04068 (FoxO signaling pathway), GO:0000082 (G1/S transition of mitotic cell cycle), GO:0006468 (protein phosphorylation), GO:0006977 (DNA damage response, signal transduction by p53 class mediator resulting in cell cycle arrest), GO:0007052 (mitotic spindle organization), GO:0007093 (mitotic cell cycle checkpoint), GO:0007265 (Ras protein signal transduction), GO:0007613 (memory), GO:0010508 (…		-0.148515	-0.189518	-0.0830685		0.243917	0.0328713	0.144314				206.13	90.5499	20.9079	0.286004	7.39098	17.8926	0.000659644	0.0184177	0.000162734	0.000165547	0.1	0.310247	0.036593	0.87831	0.889422	0.0213116	0.0176651		150.088	145.826	157.146	197.631	170.463	184.314
ENSG00000197785	ATAD3A	PC	ATPase family, AAA domain containing 3A		ATAD3A and ATAD3B (MIM 612317) are mitochondrial membrane proteins that contribute to the stabilization of large mitochondrial DNA (mtDNA)-protein complexes called nucleoids (He et al., 2007 [PubMed 17210950]).[supplied by OMIM, Sep 2008].	GO:0016049 (cell growth), GO:0043066 (negative regulation of apoptotic process), GO:0005739 (mitochondrion), GO:0005743 (mitochondrial inner membrane), GO:0016021 (integral component of membrane), GO:0042645 (mitochondrial nucleoid), GO:0005524 (ATP binding)		0.0803758	0.205521	0.22847		-0.297665	-0.0769843	-0.139718				206.071	79.8029	59.1958	-0.350183	6.28861	17.8852	0.000660845	0.0184177	0.000108882	0.000111915	0.1	0.310247	0.0115431	-0.87831	-0.912328	0.0213116	0.0111926		81.7692	89.3601	90.825	62.4589	73.1128	69.9166
ENSG00000246067	RAB30-AS1	lincRNA	RAB30 antisense RNA 1 (head to head)					-0.489689	-0.25436	-0.149682		0.396205	0.325331	0.172195				205.945	38.5094	8.02421	0.684304	3.74483	17.8692	0.00066343	0.0184453	9.48289e-05	0.000108094	0.1	0.310247	0.00621694	0.87831	0.934911	0.0213116	0.00621694		8.52317	10.3876	11.3198	17.4459	16.5136	14.6492
ENSG00000137804	NUSAP1	PC	nucleolar and spindle associated protein 1		NUSAP1 is a nucleolar-spindle-associated protein that plays a role in spindle microtubule organization (Raemaekers et al., 2003 [PubMed 12963707]).[supplied by OMIM, Jun 2009].	GO:0000070 (mitotic sister chromatid segregation), GO:0000281 (mitotic cytokinesis), GO:0007076 (mitotic chromosome condensation), GO:0040001 (establishment of mitotic spindle localization), GO:0045840 (positive regulation of mitosis), GO:0005694 (chromosome), GO:0005730 (nucleolus), GO:0005737 (cytoplasm), GO:0005876 (spindle microtubule), GO:0003677 (DNA binding), GO:0003723 (RNA binding), GO:0…		-0.182943	-0.160007	-0.150934		0.0996032	0.329304	0.0649776				205.82	82.8722	44.3061	0.341221	6.54535	17.8535	0.000665983	0.0184568	0.000122948	0.000125952	0.1	0.310247	0.07146	0.87831	0.867827	0.0213116	0.0250502		81.1033	82.435	82.9677	99.0819	116.528	96.6847
ENSG00000118418	HMGN3	PC	high mobility group nucleosomal binding domain 3		Thyroid hormone receptors are hormone-dependent transcription factors that regulate expression of a variety of specific target genes. The protein encoded by this gene binds thyroid hormone receptor beta, but only in the presence of thyroid hormone. The encoded protein, a member of the HMGN protein family, is thought to reduce the compactness of the chromatin fiber in nucleosomes, thereby enhancin…	GO:0008150 (biological_process), GO:0016569 (covalent chromatin modification), GO:0045944 (positive regulation of transcription from RNA polymerase II promoter), GO:0061178 (regulation of insulin secretion involved in cellular response to glucose stimulus), GO:0000785 (chromatin), GO:0005654 (nucleoplasm), GO:0005829 (cytosol), GO:0031492 (nucleosomal DNA binding), GO:0046966 (thyroid hormone rec…		-0.113512	-0.304492	-0.224585		0.533931	-0.0163085	0.124967				205.756	92.1753	18.2534	0.450119	7.63281	17.8454	0.000667307	0.0184568	7.46265e-05	7.56555e-05	0.1	0.310247	0.147639	0.87831	0.737257	0.0213116	0.0944819		179.519	157.013	166.069	282.33	192.171	212.147
ENSG00000116560	SFPQ	PC	splicing factor proline and glutamine rich			GO:0000122 (negative regulation of transcription from RNA polymerase II promoter), GO:0000380 (alternative mRNA splicing, via spliceosome), GO:0000724 (double-strand break repair via homologous recombination), GO:0006351 (transcription, DNA-templated), GO:0006397 (mRNA processing), GO:0008380 (RNA splicing), GO:0042752 (regulation of circadian rhythm), GO:0042754 (negative regulation of circadian…		-0.154759	-0.230857	-0.230857		0.35407	0.152246	0.110157				205.683	63.6261	35.9014	0.437716	5.17885	17.6498	0.000700184	0.0185447	0.000132202	0.000141715	0.0765225	0.310247	0.0361044	0.891133	0.915303	0.017133	0.0104565		31.6955	29.9643	29.9643	45.9452	39.686	38.4874
ENSG00000053254	FOXN3	PC	forkhead box N3		This gene is a member of the forkhead/winged helix transcription factor family. Checkpoints are eukaryotic DNA damage-inducible cell cycle arrests at G1 and G2. Checkpoint suppressor 1 suppresses multiple yeast checkpoint mutations including mec1, rad9, rad53 and dun1 by activating a MEC1-independent checkpoint pathway. Alternative splicing is observed at the locus, resulting in distinct isoforms…	GO:0006351 (transcription, DNA-templated), GO:0007095 (mitotic G2 DNA damage checkpoint), GO:0030154 (cell differentiation), GO:0045892 (negative regulation of transcription, DNA-templated), GO:0045893 (positive regulation of transcription, DNA-templated), GO:0097094 (craniofacial suture morphogenesis), GO:0005634 (nucleus), GO:0003700 (sequence-specific DNA binding transcription factor activity)…		-0.327388	-0.279138	-0.250945		0.632726	0.15939	0.0653551				205.615	53.1299	39.5504	0.645494	4.55764	17.8278	0.000670195	0.0184568	8.67435e-05	9.44335e-05	0.1	0.310247	0.116984	0.87831	0.797059	0.0213116	0.0575985		17.579	18.2449	18.6444	36.0903	25.4363	23.7051
ENSG00000135269	TES	PC	testin LIM domain protein		Cancer-associated chromosomal changes often involve regions containing fragile sites. This gene maps to a commom fragile site on chromosome 7q31.2 designated FRA7G. This gene is similar to mouse Testin, a testosterone-responsive gene encoding a Sertoli cell secretory protein containing three LIM domains. LIM domains are double zinc-finger motifs that mediate protein-protein interactions between t…	GO:0008285 (negative regulation of cell proliferation), GO:0005634 (nucleus), GO:0005829 (cytosol), GO:0005886 (plasma membrane), GO:0005925 (focal adhesion), GO:0030054 (cell junction), GO:0043234 (protein complex), GO:0003723 (RNA binding), GO:0005515 (protein binding), GO:0008270 (zinc ion binding), GO:0045296 (cadherin binding)		-0.324483	-0.256593	-0.273269		0.439901	0.219243	0.195201				205.598	36.5208	33.0134	0.670266	3.63313	17.8256	0.000670554	0.0184568	0.000124384	0.000142743	0.1	0.310247	0.0245209	0.87831	0.946183	0.0213116	0.00426653		9.05587	9.58857	9.45539	16.78	14.1165	13.8502
ENSG00000163938	GNL3	PC	G protein nucleolar 3		The protein encoded by this gene may interact with p53 and may be involved in tumorigenesis. The encoded protein also appears to be important for stem cell proliferation. This protein is found in both the nucleus and nucleolus. Three transcript variants encoding two different isoforms have been found for this gene. [provided by RefSeq, Nov 2010].	hsa03008 (Ribosome biogenesis in eukaryotes), GO:0008283 (cell proliferation), GO:0032206 (positive regulation of telomere maintenance), GO:0033235 (positive regulation of protein sumoylation), GO:0042127 (regulation of cell proliferation), GO:1902895 (positive regulation of pri-miRNA transcription from RNA polymerase II promoter), GO:1904816 (NA), GO:0005615 (extracellular space), GO:0005634 (nu…		-0.0757254	-0.25773	-0.115914		0.279777	0.0716254	0.0979671				205.463	91.1551	19.7925	0.303869	7.47869	17.8086	0.000673352	0.0184568	0.000149809	0.000152182	0.1	0.310247	0.0343286	0.87831	0.861294	0.0213116	0.0275248		167.667	147.557	163.006	215.077	185.912	189.374
ENSG00000090006	LTBP4	PC	latent transforming growth factor beta binding protein 4		The protein encoded by this gene binds transforming growth factor beta (TGFB) as it is secreted and targeted to the extracellular matrix. TGFB is biologically latent after secretion and insertion into the extracellular matrix, and sheds TGFB and other proteins upon activation. Defects in this gene may be a cause of cutis laxa and severe pulmonary, gastrointestinal, and urinary abnormalities. Thre…	GO:0001558 (regulation of cell growth), GO:0006457 (protein folding), GO:0007179 (transforming growth factor beta receptor signaling pathway), GO:0007275 (multicellular organismal development), GO:0017015 (regulation of transforming growth factor beta receptor signaling pathway), GO:0030162 (regulation of proteolysis), GO:0030252 (growth hormone secretion), GO:0045595 (regulation of cell differen…		0.102331	0.246872	0.238067		-0.441168	-0.0967936	-0.0493093				205.339	85.2412	31.8115	-0.389728	6.78604	17.7931	0.000675924	0.0184816	9.00495e-05	9.17975e-05	0.1	0.310247	0.0461303	-0.87831	-0.855852	0.0213116	0.0296705		116.794	129.312	128.513	79.5052	101.479	104.942
ENSG00000141522	ARHGDIA	PC	Rho GDP dissociation inhibitor alpha		This gene encodes a protein that plays a key role in the regulation of signaling through Rho GTPases. The encoded protein inhibits the disassociation of Rho family members from GDP (guanine diphosphate), thereby maintaining these factors in an inactive state. Activity of this protein is important in a variety of cellular processes, and expression of this gene may be altered in tumors. Mutations i…	hsa04722 (Neurotrophin signaling pathway), hsa04962 (Vasopressin-regulated water reabsorption), GO:0006928 (cellular component movement), GO:0007162 (negative regulation of cell adhesion), GO:0035023 (regulation of Rho protein signal transduction), GO:0043066 (negative regulation of apoptotic process), GO:0043547 (positive regulation of GTPase activity), GO:0050771 (negative regulation of axonoge…		0.110541	0.381238	0.204651		-0.564916	-0.0753861	-0.0561275				205.196	91.207	14.1894	-0.455336	7.48675	17.7751	0.000678923	0.0185184	7.55447e-05	7.66376e-05	0.1	0.310247	0.0567645	-0.87831	-0.810833	0.0213116	0.0502917		189.641	229.193	202.558	117.993	166.468	168.732
ENSG00000185721	DRG1	PC	developmentally regulated GTP binding protein 1			GO:0006351 (transcription, DNA-templated), GO:0007275 (multicellular organismal development), GO:0005829 (cytosol), GO:0005844 (polysome), GO:0016020 (membrane), GO:0016604 (nuclear body), GO:0005515 (protein binding), GO:0005525 (GTP binding), GO:0008134 (transcription factor binding), GO:0042802 (identical protein binding)		-0.108467	-0.222819	-0.168013		0.319404	0.0567095	0.123185				205.087	82.5091	9.22611	0.343867	6.5138	17.7614	0.000681207	0.0185184	0.000124094	0.000127159	0.1	0.310247	0.0533178	0.87831	0.87136	0.0213116	0.0237579		83.6336	77.1081	80.1711	113.198	94.0212	98.5492
ENSG00000133104	SPART	PC	spartin		This gene encodes a protein containing a MIT (Microtubule Interacting and Trafficking molecule) domain, and is implicated in regulating endosomal trafficking and mitochondria function. The protein localizes to mitochondria and partially co-localizes with microtubules. Stimulation with epidermal growth factor (EGF) results in protein translocation to the plasma membrane, and the protein functions …	hsa04144 (Endocytosis), GO:0009838 (abscission), GO:0030514 (negative regulation of BMP signaling pathway), GO:0034389 (lipid particle organization), GO:0048698 (negative regulation of collateral sprouting in absence of injury), GO:0050905 (neuromuscular process), GO:0051301 (cell division), GO:0051881 (regulation of mitochondrial membrane potential), GO:0060612 (adipose tissue development), GO:0…		-0.1375	-0.336469	-0.326346		0.499585	0.420637	-0.119907				205.024	69.6006	75.9792	0.579657	5.56645	17.7535	0.000682531	0.0185184	6.28003e-05	6.62098e-05	0.1	0.310247	0.118152	0.87831	0.777641	0.0213116	0.0686679		41.4173	35.824	36.0903	65.5219	61.9262	41.95
ENSG00000224032	EPB41L4A-AS1	lincRNA	EPB41L4A antisense RNA 1					-0.267153	-0.250854	-0.300313		0.328599	0.239113	0.250607				204.938	36.9618	42.5076	0.636073	3.65871	17.7427	0.000684345	0.0185184	0.000136782	0.000157098	0.1	0.310247	0.00165051	0.87831	0.99137	0.0213116	0.000111383		9.72174	9.85492	9.45539	15.7146	14.6492	14.7824
ENSG00000260027	HOXB7	PC	homeobox B7		This gene is a member of the Antp homeobox family and encodes a protein with a homeobox DNA-binding domain. It is included in a cluster of homeobox B genes located on chromosome 17. The encoded nuclear protein functions as a sequence-specific transcription factor that is involved in cell proliferation and differentiation. Increased expression of this gene is associated with some cases of melanoma…	GO:0006355 (regulation of transcription, DNA-templated), GO:0006366 (transcription from RNA polymerase II promoter), GO:0007275 (multicellular organismal development), GO:0009952 (anterior/posterior pattern specification), GO:0030099 (myeloid cell differentiation), GO:0045944 (positive regulation of transcription from RNA polymerase II promoter), GO:0048704 (embryonic skeletal system morphogenesi…		-0.193932	-0.344669	-0.125169		0.523345	0.117499	0.0229263				204.894	83.4515	12.9529	0.465936	6.59819	17.7372	0.000685272	0.0185184	7.21921e-05	7.35738e-05	0.1	0.310247	0.124477	0.87831	0.761994	0.0213116	0.0782289		82.5682	74.1782	86.6966	137.037	102.944	96.2852
ENSG00000162819	BROX	PC	BRO1 domain and CAAX motif containing			GO:0016020 (membrane), GO:0070062 (extracellular vesicular exosome)		-0.316333	-0.168268	-0.417237		0.28145	0.404814	0.215573				204.746	33.1662	75.7631	0.716424	3.43716	17.7186	0.000688414	0.0185232	0.00010573	0.000123054	0.1	0.310247	0.00287117	0.87831	0.957664	0.0213116	0.00265052		7.8573	8.9227	7.19143	12.9179	14.2497	12.2521
[truncated: 11,137 more rows]
