# Supplementary material for: Effects of Siberian fir terpenes extract Abisil on antioxidant activity, autophagy, transcriptome and proteome of human fibroblasts
Source: Aging (Albany NY). 2021 Aug 24;13(16):20050–80. doi: 10.18632/aging.203448 (PMC8436938; doi:10.18632/aging.203448)
Supplement: Supplementary Table 4 [file aging-13-203448-s005.xlsx]

## Sheet: Abysil overview
	Supplementary Table 4. The results of differential gene expression analysis: identification of genes, the expression of which gradually increases/decreases with the increase of drug concentration (0 µg/ml - 5 µg/ml - 50 µg/ml).
Gene ID	Gene	Biotype	Name	RefSeq_Summary	Annotation			Control			5 μg/ml				50 μg/ml				0	0.5	1	Score	LogCPM rank (%)	Tr.Length rank (%)	LogFC	LogCPM	F	p (QLF test)	FDR (QLF test)	p (LR test)	p (Krusk-W.)	FDR (Krusk-W.)	Spear- man r	Pearson r	p (Spearman)	p (Pearson)	CPMs:	control_1	control_2	5mkg_1	5mkg_2	5mkg_3	50mkg_1	50mkg_2	50mkg_3
Abysil overview								0	0		1	1	1		2	2	2																					0	0	1	1	1	2	2	2
Hi vs Low								-0.25	-0.25		0	0	0		1	1	1																							0	0	0	1	1	1
Hi vs Cnt								0	0		-0.25	-0.25	-0.25		1	1	1																					0	0				1	1	1
ENSG00000139350	NEDD1	PC	neural precursor cell expressed, developmentally down-regulated 1		GO:0000086 (G2/M transition of mitotic cell cycle), GO:0007067 (mitotic nuclear division), GO:0051301 (cell division), GO:0071539 (protein localization to centrosome), GO:0097711 (NA), GO:0000242 (pericentriolar material), GO:0000922 (spindle pole), GO:0005813 (centrosome), GO:0005814 (centriole), GO:0005829 (cytosol), GO:0036064 (ciliary basal body), GO:0045177 (apical part of cell), GO:0005515 …			1.25227	1.5148		-0.184417	-0.369983	-0.287516		-0.794513	-0.673196	-0.457452					470.305	56.1309	56.5593	-2.14518	4.71669	61.7631	5.2807e-06	0.0116132	1.36066e-13	0.0439369	0.23887	-0.944911	-0.870591	0.000400878	0.00490564		53.4425	64.5077	18.4812	16.0092	17.0686	11.4183	12.5955	14.9498
ENSG00000137267	TUBB2A	PC	tubulin beta 2A class IIa		hsa04145 (Phagosome), hsa04540 (Gap junction), hsa05130 (Pathogenic Escherichia coli infection), GO:0007010 (cytoskeleton organization), GO:0007017 (microtubule-based process), GO:0005634 (nucleus), GO:0005737 (cytoplasm), GO:0005874 (microtubule), GO:0015630 (microtubule cytoskeleton), GO:0070062 (extracellular vesicular exosome), GO:1903561 (extracellular vesicle), GO:0003924 (GTPase activity),…			-0.940447	-0.904819		0.00449566	0.050595	0.112755		0.614258	0.674381	0.388782					466.591	46.0745	36.7799	1.63276	4.14459	61.0341	5.60241e-06	0.0116132	8.98986e-12	0.0439369	0.23887	0.944911	0.977452	0.000400878	2.81761e-05		7.41603	7.65146	16.1269	16.7155	17.5395	25.6618	26.839	21.6595
ENSG00000127947	PTPN12	PC	protein tyrosine phosphatase, non-receptor type 12	The protein encoded by this gene is a member of the protein tyrosine phosphatase (PTP) family. PTPs are signaling molecules that regulate a variety of cellular processes including cell growth, differentiation, mitotic cycle, and oncogenic transformation. This PTP contains a C-terminal PEST motif, which serves as a protein-protein interaction domain, and may regulate protein intracellular half-lif…	GO:0006470 (protein dephosphorylation), GO:0035335 (peptidyl-tyrosine dephosphorylation), GO:0038128 (ERBB2 signaling pathway), GO:0042058 (regulation of epidermal growth factor receptor signaling pathway), GO:0042246 (tissue regeneration), GO:0071364 (cellular response to epidermal growth factor stimulus), GO:1901185 (negative regulation of ERBB signaling pathway), GO:2000587 (negative regulatio…			0.725577	0.725577		-0.00324375	-0.105695	-0.130897		-0.457615	-0.4183	-0.335403					448.543	58.645	20.6352	-1.17767	4.85881	57.2796	7.67243e-06	0.0116132	8.74255e-11	0.0423134	0.23887	-0.950586	-0.934858	0.000290566	0.000657758		46.3796	46.3796	27.1921	25.1909	24.7201	19.3052	19.8938	21.1886
ENSG00000228253	MT-ATP8	PC	mitochondrially encoded ATP synthase membrane subunit 8		hsa00190 (Oxidative phosphorylation), hsa01100 (Metabolic pathways), hsa04714 (Thermogenesis), hsa05010 (Alzheimer disease), hsa05012 (Parkinson disease), hsa05016 (Huntington disease), R-HSA-1428517 (Homo sapiens: The citric acid (TCA) cycle and respiratory electron transport), R-HSA-1430728 (Homo sapiens: Metabolism), R-HSA-163200 (Homo sapiens: Respiratory electron transport, ATP synthesis by …			2.38112	1.66442		-0.530758	-0.543271	-0.375021		-0.732331	-1.05534	-0.808823					444.168	95.4658	0.873401	-2.8507	8.21978	56.6998	8.06661e-06	0.0116132	9.78241e-14	0.0439369	0.23887	-0.944911	-0.813298	0.000400878	0.0140768		1023.88	622.24	134.312	133.135	149.851	116.538	92.7592	110.416
ENSG00000213443	AC007068.1	p_Pg						1.33299	0.989678		-0.33051	0.0934832	-0.235156		-0.906582	-0.348545	-0.595355					441.372	55.4428	14.7861	-1.8799	4.67989	56.1674	8.44966e-06	0.0116132	2.58561e-12	0.0439369	0.23887	-0.944911	-0.883444	0.000400878	0.00362062		58.0333	45.3202	16.9509	23.4252	18.2458	10.712	16.7155	13.7726
ENSG00000142871	CYR61	PC	cysteine rich angiogenic inducer 61	The secreted protein encoded by this gene is growth factor-inducible and promotes the adhesion of endothelial cells. The encoded protein interacts with several integrins and with heparan sulfate proteoglycan. This protein also plays a role in cell proliferation, differentiation, angiogenesis, apoptosis, and extracellular matrix formation. [provided by RefSeq, Sep 2011]. Publication Note: This Ref…	GO:0001558 (regulation of cell growth), GO:0001649 (osteoblast differentiation), GO:0001934 (positive regulation of protein phosphorylation), GO:0002041 (intussusceptive angiogenesis), GO:0003181 (atrioventricular valve morphogenesis), GO:0003278 (apoptotic process involved in heart morphogenesis), GO:0003281 (ventricular septum development), GO:0006935 (chemotaxis), GO:0008283 (cell proliferatio…			-0.332444	-0.504529		-0.00428174	-0.130991	-0.092698		0.501379	0.270969	0.292596					437.128	99.4001	49.4663	0.782856	10.5697	55.3626	9.06982e-06	0.0116132	1.17313e-09	0.0439369	0.23887	0.944911	0.945438	0.000400878	0.00038964		1177.85	1045.19	1479.2	1354.66	1391.15	2100.97	1790.56	1817.63
ENSG00000138674	SEC31A	PC	SEC31 homolog A, COPII coat complex component	The protein encoded by this gene is similar to yeast Sec31 protein. Yeast Sec31 protein is known to be a component of the COPII protein complex which is responsible for vesicle budding from endoplasmic reticulum (ER). This protein was found to colocalize with SEC13, one of the other components of COPII , in the subcellular structures corresponding to the vesicle transport function. An immunodeple…	hsa04141 (Protein processing in endoplasmic reticulum), GO:0002474 (antigen processing and presentation of peptide antigen via MHC class I), GO:0006888 (ER to Golgi vesicle-mediated transport), GO:0015031 (protein transport), GO:0019886 (antigen processing and presentation of exogenous peptide antigen via MHC class II), GO:0036498 (NA), GO:0048208 (COPII vesicle coating), GO:0051592 (response to …			0.733061	0.884382		0.0343153	-0.0892025	-0.176416		-0.696522	-0.469742	-0.219875					429.753	69.7689	67.0137	-1.28423	5.529	53.9742	1.02698e-05	0.0116132	4.33653e-11	0.0439369	0.23887	-0.944911	-0.918508	0.000400878	0.0012716		72.5123	80.7523	43.9076	40.1407	37.6687	25.6618	30.3704	36.4916
ENSG00000135334	AKIRIN2	PC	akirin 2		GO:0000122 (negative regulation of transcription from RNA polymerase II promoter), GO:0006351 (transcription, DNA-templated), GO:0008284 (positive regulation of cell proliferation), GO:0009790 (embryo development), GO:0010950 (positive regulation of endopeptidase activity), GO:0032496 (response to lipopolysaccharide), GO:0032755 (positive regulation of interleukin-6 production), GO:0045087 (innat…			0.593233	0.65095		-0.0518637	-0.0789762	-0.0214892		-0.508434	-0.32569	-0.25773					423.201	69.6101	25.8139	-1.00159	5.5207	52.7511	1.14834e-05	0.0116132	7.75767e-10	0.0439369	0.23887	-0.944911	-0.942778	0.000400878	0.000448532		67.2151	70.0402	42.2596	41.4356	43.2013	30.2527	34.6081	36.3738
ENSG00000224114	AL591846.1	p_Pg						-0.476314	-1.08466		-0.0253129	0.00344706	-0.157023		0.671416	0.724205	0.344244					418.89	64.4936	2.43494	1.41837	5.19182	51.9519	1.23674e-05	0.0116132	5.8814e-11	0.0439369	0.23887	0.944911	0.940205	0.000400878	0.000510799		23.6607	14.8321	33.0778	33.7841	30.0172	54.855	56.9739	43.319
ENSG00000145604	SKP2	PC	S-phase kinase associated protein 2	This gene encodes a member of the F-box protein family which is characterized by an approximately 40 amino acid motif, the F-box. The F-box proteins constitute one of the four subunits of ubiquitin protein ligase complex called SCFs (SKP1-cullin-F-box), which function in phosphorylation-dependent ubiquitination. The F-box proteins are divided into 3 classes: Fbws containing WD-40 domains, Fbls co…	hsa04068 (FoxO signaling pathway), hsa04110 (Cell cycle), hsa04120 (Ubiquitin mediated proteolysis), hsa04150 (mTOR signaling pathway), hsa05168 (Herpes simplex infection), hsa05169 (Epstein-Barr virus infection), hsa05200 (Pathways in cancer), hsa05203 (Viral carcinogenesis), hsa05222 (Small cell lung cancer), GO:0000082 (G1/S transition of mitotic cell cycle), GO:0000086 (G2/M transition of mit…			-0.517582	-0.667332		-0.0636961	-0.24526	-0.0306974		0.835518	0.297022	0.392027					417.999	84.5183	60.7146	1.15658	6.63126	51.7873	1.25593e-05	0.0116132	1.89759e-10	0.0439369	0.23887	0.944911	0.881541	0.000400878	0.00379524		64.8608	58.2688	89.5809	78.7511	91.6997	168.803	115.596	123.6
ENSG00000121481	RNF2	PC	ring finger protein 2	Polycomb group (PcG) of proteins form the multiprotein complexes that are important for the transcription repression of various genes involved in development and cell proliferation. The protein encoded by this gene is one of the PcG proteins. It has been shown to interact with, and suppress the activity of, transcription factor CP2 (TFCP2/CP2). Studies of the mouse counterpart suggested the invol…	GO:0000122 (negative regulation of transcription from RNA polymerase II promoter), GO:0000278 (mitotic cell cycle), GO:0001702 (gastrulation with mouth forming second), GO:0006351 (transcription, DNA-templated), GO:0007281 (germ cell development), GO:0009948 (anterior/posterior axis specification), GO:0035518 (histone H2A monoubiquitination), GO:0036353 (histone H2A-K119 monoubiquitination), GO:0…			0.683914	0.790832		0.0849886	0.0566982	-0.0469296		-0.820212	-0.514084	-0.235207					417.627	52.3289	63.4671	-1.34646	4.49739	51.7187	1.26402e-05	0.0116132	1.30193e-10	0.0439369	0.23887	-0.944911	-0.955507	0.000400878	0.000212914		34.7258	37.551	22.2481	21.7772	20.1292	10.9475	14.008	17.4218
ENSG00000233966	UBE2SP1	p_Pg	ubiquitin conjugating enzyme E2 S pseudogene 1					1.00156	0.823096		-0.266965	-0.0398879	-0.2186		-0.434848	-0.398474	-0.465877					414.617	65.8169	8.34583	-1.37236	5.27421	51.164	1.33179e-05	0.0116132	8.96818e-11	0.0439369	0.23887	-0.944911	-0.889861	0.000400878	0.00307026		72.8654	64.1545	29.0755	34.3727	30.135	25.6618	26.3681	25.0732
ENSG00000265794	AC005899.4	PT						1.04263	1.30449		-0.22846	-0.0878568	-0.257144		-0.998016	-0.489236	-0.28641					409.96	65.6934	3.14954	-1.78833	5.26651	50.3102	1.44461e-05	0.0116972	2.20251e-11	0.0439369	0.23887	-0.944911	-0.879931	0.000400878	0.00394711		70.158	84.5192	27.8984	30.959	27.3098	15.5383	22.9544	26.7212
ENSG00000198886	MT-ND4	PC	mitochondrially encoded NADH:ubiquinone oxidoreductase core subunit 4		hsa00190 (Oxidative phosphorylation), hsa01100 (Metabolic pathways), hsa04714 (Thermogenesis), hsa04723 (Retrograde endocannabinoid signaling), hsa05012 (Parkinson disease), R-HSA-1428517 (Homo sapiens: The citric acid (TCA) cycle and respiratory electron transport), R-HSA-1430728 (Homo sapiens: Metabolism), R-HSA-163200 (Homo sapiens: Respiratory electron transport, ATP synthesis by chemiosmotic…			0.816024	0.855044		-0.10991	0.172967	-0.212967		-0.817625	-0.494949	-0.208584					408.727	99.9824	47.0843	-1.29091	13.3837	53.2963	1.09228e-05	0.0116132	3.67059e-11	0.0685251	0.23887	-0.869318	-0.922481	0.00504681	0.00109792		17447.4	17925.8	9182.33	11171.8	8549.15	5621.47	7030.98	8575.16
ENSG00000173436	MINOS1	PC	mitochondrial inner membrane organizing system 1		GO:0008150 (biological_process), GO:0005739 (mitochondrion), GO:0005743 (mitochondrial inner membrane), GO:0016021 (integral component of membrane), GO:0003674 (molecular_function), GO:0005515 (protein binding)			-0.329813	-0.505469		-0.0741249	-0.0623836	-0.0420634		0.456281	0.341653	0.21592					401.159	87.4735	35.1919	0.772956	6.934	48.7102	1.68764e-05	0.0127541	1.52969e-08	0.0439369	0.23887	0.944911	0.956773	0.000400878	0.000195436		94.5249	83.4597	113.242	114.183	115.831	164.447	151.734	138.903
ENSG00000112996	MRPS30	PC	mitochondrial ribosomal protein S30	Mammalian mitochondrial ribosomal proteins are encoded by nuclear genes and help in protein synthesis within the mitochondrion. Mitochondrial ribosomes (mitoribosomes) consist of a small 28S subunit and a large 39S subunit. They have an estimated 75% protein to rRNA composition compared to prokaryotic ribosomes, where this ratio is reversed. Another difference between mammalian mitoribosomes and …	GO:0006915 (apoptotic process), GO:0070125 (mitochondrial translational elongation), GO:0070126 (mitochondrial translational termination), GO:0005743 (mitochondrial inner membrane), GO:0005840 (ribosome), GO:0003723 (RNA binding), GO:0003735 (structural constituent of ribosome), R-HSA-1852241 (Homo sapiens: Organelle biogenesis and maintenance), R-HSA-5368286 (Homo sapiens: Mitochondrial translat…			0.777003	1.15499		-0.122097	-0.181806	-0.279896		-0.457098	-0.490267	-0.400827					388.942	58.945	67.5959	-1.47817	4.87698	46.5194	2.10268e-05	0.0128431	4.0833e-10	0.0439369	0.23887	-0.944911	-0.864807	0.000400878	0.00556794		46.7327	61.3294	24.1315	23.0721	21.4241	18.7166	18.2458	19.5406
ENSG00000151914	DST	PC	dystonin	This gene encodes a member of the plakin protein family of adhesion junction plaque proteins. Multiple alternatively spliced transcript variants encoding distinct isoforms have been found for this gene, but the full-length nature of some variants has not been defined. It has been reported that some isoforms are expressed in neural and muscle tissue, anchoring neural intermediate filaments to the …	GO:0007010 (cytoskeleton organization), GO:0007155 (cell adhesion), GO:0007229 (integrin-mediated signaling pathway), GO:0008090 (retrograde axon cargo transport), GO:0009611 (response to wounding), GO:0030011 (maintenance of cell polarity), GO:0045104 (intermediate filament cytoskeleton organization), GO:0048870 (cell motility), GO:0005604 (basement membrane), GO:0005634 (nucleus), GO:0005635 (n…			0.811287	0.659807		-0.214891	0.0194576	-0.146903		-0.575754	-0.246441	-0.306563					382.55	82.0395	97.1328	-1.09524	6.40622	45.3871	2.3636e-05	0.0128431	1.50327e-09	0.0439369	0.23887	-0.944911	-0.900437	0.000400878	0.00228678		142.082	127.72	68.7454	81.2231	72.1591	53.0893	67.2151	64.3899
ENSG00000271982	SNORD58B	snoRNA	small nucleolar RNA, C/D box 58B					-0.883982	-1.34701		0.251023	-0.0565012	0.178374		0.814376	0.583232	0.460485					379.335	52.4612	0.132333	1.82098	4.50769	44.8214	2.50808e-05	0.0128431	3.5135e-10	0.0439369	0.23887	0.944911	0.955892	0.000400878	0.000207497		10.0057	6.70974	24.3669	19.3052	23.0721	36.9624	31.1944	28.487
ENSG00000167766	ZNF83	PC	zinc finger protein 83		GO:0006351 (transcription, DNA-templated), GO:0006355 (regulation of transcription, DNA-templated), GO:0005634 (nucleus), GO:0003677 (DNA binding), GO:0003700 (sequence-specific DNA binding transcription factor activity), GO:0005515 (protein binding), GO:0046872 (metal ion binding)			0.820459	1.37248		-0.204327	-0.280961	-0.179661		-0.477396	-0.602954	-0.447643					379.07	21.4273	50.4367	-2.09398	2.83223	44.7748	2.52043e-05	0.0128431	5.91501e-10	0.0439369	0.23887	-0.944911	-0.840595	0.000400878	0.00895421		11.8892	18.3635	4.8263	4.47316	4.94402	3.64916	3.1783	3.76687
ENSG00000169764	UGP2	PC	UDP-glucose pyrophosphorylase 2	The enzyme encoded by this gene is an important intermediary in mammalian carbohydrate interconversions. It transfers a glucose moiety from glucose-1-phosphate to MgUTP and forms UDP-glucose and MgPPi. In liver and muscle tissue, UDP-glucose is a direct precursor of glycogen; in lactating mammary gland it is converted to UDP-galactose which is then converted to lactose. The eukaryotic enzyme has …	hsa00040 (Pentose and glucuronate interconversions), hsa00052 (Galactose metabolism), hsa00500 (Starch and sucrose metabolism), hsa00520 (Amino sugar and nucleotide sugar metabolism), hsa01100 (Metabolic pathways), GO:0005977 (glycogen metabolic process), GO:0005978 (glycogen biosynthetic process), GO:0006011 (UDP-glucose metabolic process), GO:0006065 (UDP-glucuronate biosynthetic process), GO:0…			0.877134	1.00221		-0.230231	-0.302383	-0.101278		-0.417866	-0.500332	-0.327259					373.937	63.5056	22.2585	-1.3809	5.13435	43.8767	2.77308e-05	0.0128431	1.19941e-09	0.0439369	0.23887	-0.944911	-0.878482	0.000400878	0.00408712		60.3876	66.0379	26.9567	25.5441	29.6641	23.4252	22.0126	25.0732
ENSG00000154734	ADAMTS1	PC	ADAM metallopeptidase with thrombospondin type 1 motif 1	This gene encodes a member of the ADAMTS (a disintegrin and metalloproteinase with thrombospondin motif) protein family. Members of the family share several distinct protein modules, including a propeptide region, a metalloproteinase domain, a disintegrin-like domain, and a thrombospondin type 1 (TS) motif. Individual members of this family differ in the number of C-terminal TS motifs, and some h…	GO:0001542 (ovulation from ovarian follicle), GO:0001822 (kidney development), GO:0006508 (proteolysis), GO:0007229 (integrin-mediated signaling pathway), GO:0008285 (negative regulation of cell proliferation), GO:0060347 (heart trabecula formation), GO:0005604 (basement membrane), GO:0005829 (cytosol), GO:0031410 (cytoplasmic vesicle), GO:0004222 (metalloendopeptidase activity), GO:0008201 (hepa…			-1.1278	-0.753371		-0.0434111	0.106076	0.241517		0.644885	0.605247	0.326852					372.848	57.8511	76.4623	1.51369	4.81574	43.6871	2.83018e-05	0.0128431	1.42399e-09	0.0439369	0.23887	0.944911	0.952294	0.000400878	0.000261807		10.712	14.4789	24.9555	27.8984	30.8413	41.4356	40.2584	32.8424
ENSG00000237973	MTCO1P12	u_Pg	mitochondrially encoded cytochrome c oxidase I pseudogene 12					-1.89691	-1.27782		0.372952	0.273409	-0.260978		0.739103	0.896081	1.15416					371.949	37.9234	55.933	2.92053	3.72554	43.5308	2.87825e-05	0.0128431	7.98312e-11	0.0439369	0.23887	0.944911	0.955468	0.000400878	0.000213471		1.29486	3.06058	13.8903	12.8309	8.24003	18.4812	20.8355	25.3087
ENSG00000169375	SIN3A	PC	SIN3 transcription regulator family member A	The protein encoded by this gene is a transcriptional regulatory protein. It contains paired amphipathic helix (PAH) domains, which are important for protein-protein interactions and may mediate repression by the Mad-Max complex. [provided by RefSeq, Jul 2008].	hsa04919 (Thyroid hormone signaling pathway), hsa05016 (Huntington disease), hsa05169 (Epstein-Barr virus infection), hsa05202 (Transcriptional misregulation in cancer), GO:0000122 (negative regulation of transcription from RNA polymerase II promoter), GO:0001701 (in utero embryonic development), GO:0002218 (activation of innate immune response), GO:0002230 (positive regulation of defense respons…			0.804556	0.556905		-0.0119635	-0.0039703	-0.120118		-0.561338	-0.237043	-0.427027					371.339	49.9206	67.4371	-1.17217	4.36869	43.4247	2.91144e-05	0.0128431	9.91247e-09	0.0439369	0.23887	-0.944911	-0.923937	0.000400878	0.00103838		35.3144	29.4287	19.1875	19.3052	17.6572	12.4778	16.1269	13.8903
ENSG00000060718	COL11A1	PC	collagen type XI alpha 1 chain	This gene encodes one of the two alpha chains of type XI collagen, a minor fibrillar collagen. Type XI collagen is a heterotrimer but the third alpha chain is a post-translationally modified alpha 1 type II chain. Mutations in this gene are associated with type II Stickler syndrome and with Marshall syndrome. A single-nucleotide polymorphism in this gene is also associated with susceptibility to …	hsa04974 (Protein digestion and absorption), GO:0001502 (cartilage condensation), GO:0001503 (ossification), GO:0002063 (chondrocyte development), GO:0006029 (proteoglycan metabolic process), GO:0007601 (visual perception), GO:0007605 (sensory perception of sound), GO:0030198 (extracellular matrix organization), GO:0030199 (collagen fibril organization), GO:0030574 (collagen catabolic process), G…			0.493913	0.969594		-0.0941788	-0.0215706	-0.0849004		-0.451466	-0.347953	-0.463439					368.041	47.6182	91.6983	-1.27025	4.23755	42.8532	3.0981e-05	0.0128431	1.05181e-08	0.0439369	0.23887	-0.944911	-0.881693	0.000400878	0.0037811		25.4264	36.1384	16.2446	17.1863	16.3623	12.2423	13.3018	12.1246
ENSG00000083312	TNPO1	PC	transportin 1	This gene encodes the beta subunit of the karyopherin receptor complex which interacts with nuclear localization signals to target nuclear proteins to the nucleus. The karyopherin receptor complex is a heterodimer of an alpha subunit which recognizes the nuclear localization signal and a beta subunit which docks the complex at nucleoporins. Alternate splicing of this gene results in two transcrip…	GO:0000060 (protein import into nucleus, translocation), GO:0006607 (NLS-bearing protein import into nucleus), GO:0006610 (ribosomal protein import into nucleus), GO:0016032 (viral process), GO:0035735 (intraciliary transport involved in cilium morphogenesis), GO:0043488 (regulation of mRNA stability), GO:0005634 (nucleus), GO:0005737 (cytoplasm), GO:0005829 (cytosol), GO:0005929 (cilium), GO:003…			0.635663	1.07673		-0.131011	-0.202999	-0.111986		-0.533347	-0.516571	-0.216482					367.106	75.6881	61.3233	-1.28537	5.93122	42.6915	3.15342e-05	0.0128431	1.94993e-09	0.0439369	0.23887	-0.944911	-0.858691	0.000400878	0.00632768		88.5215	120.893	51.2059	48.6162	51.9122	38.2573	38.7281	48.1453
ENSG00000132646	PCNA	PC	proliferating cell nuclear antigen	The protein encoded by this gene is found in the nucleus and is a cofactor of DNA polymerase delta. The encoded protein acts as a homotrimer and helps increase the processivity of leading strand synthesis during DNA replication. In response to DNA damage, this protein is ubiquitinated and is involved in the RAD6-dependent DNA repair pathway. Two transcript variants encoding the same protein have …	hsa03030 (DNA replication), hsa03410 (Base excision repair), hsa03420 (Nucleotide excision repair), hsa03430 (Mismatch repair), hsa04110 (Cell cycle), hsa04530 (Tight junction), hsa05161 (Hepatitis B), GO:0000082 (G1/S transition of mitotic cell cycle), GO:0000083 (regulation of transcription involved in G1/S transition of mitotic cell cycle), GO:0000722 (telomere maintenance via recombination), …			0.745739	0.809781		-0.259448	-0.179925	-0.114327		-0.407743	-0.326477	-0.267602					366.218	97.4241	45.408	-1.06219	8.88818	42.5382	3.20694e-05	0.0128431	2.62927e-09	0.0439369	0.23887	-0.944911	-0.878857	0.000400878	0.00405059		752.668	786.923	373.98	395.286	413.767	337.253	356.911	371.861
ENSG00000095002	MSH2	PC	mutS homolog 2	This locus is frequently mutated in hereditary nonpolyposis colon cancer (HNPCC). When cloned, it was discovered to be a human homolog of the E. coli mismatch repair gene mutS, consistent with the characteristic alterations in microsatellite sequences (RER+ phenotype) found in HNPCC. Two transcript variants encoding different isoforms have been found for this gene. [provided by RefSeq, Apr 2012].	hsa01524 (Platinum drug resistance), hsa03430 (Mismatch repair), hsa05200 (Pathways in cancer), hsa05210 (Colorectal cancer), GO:0001701 (in utero embryonic development), GO:0006119 (oxidative phosphorylation), GO:0006281 (DNA repair), GO:0006298 (mismatch repair), GO:0006301 (postreplication repair), GO:0006302 (double-strand break repair), GO:0007050 (cell cycle arrest), GO:0007281 (germ cell d…			0.673963	0.609316		-0.198899	-0.0230463	-0.106902		-0.419813	-0.259527	-0.275091					364.942	77.4435	69.4398	-0.951788	6.05483	42.3184	3.28555e-05	0.0128431	1.47327e-08	0.0439369	0.23887	-0.944911	-0.90888	0.000400878	0.00176447		102.765	98.1741	55.2082	62.6242	58.9751	47.0859	52.8539	52.2653
ENSG00000151327	FAM177A1	PC	family with sequence similarity 177 member A1					0.626703	0.570969		0.0613349	-0.0802238	-0.204408		-0.322593	-0.358219	-0.293563					353.576	63.9026	44.6317	-0.948117	5.15892	40.3769	4.0876e-05	0.0142255	5.33888e-08	0.0439369	0.23887	-0.944911	-0.92611	0.000400878	0.000953499		53.9133	51.7945	35.7853	32.2538	29.4287	26.9567	26.2504	27.5452
ENSG00000120992	LYPLA1	PC	lysophospholipase I	This gene encodes a member of the alpha/beta hydrolase superfamily. The encoded protein functions as a homodimer, exhibiting both depalmitoylating as well as lysophospholipase activity, and may be involved in Ras localization and signaling. Alternate splicing results in multiple transcript variants. Pseudogenes of this gene have been defined on chromosomes 4, 6, and 7. [provided by RefSeq, Jul 20…	hsa00564 (Glycerophospholipid metabolism), hsa05231 (Choline metabolism in cancer), GO:0002084 (protein depalmitoylation), GO:0006631 (fatty acid metabolic process), GO:0042997 (negative regulation of Golgi to plasma membrane protein transport), GO:0050999 (regulation of nitric-oxide synthase activity), GO:0005737 (cytoplasm), GO:0005739 (mitochondrion), GO:0005829 (cytosol), GO:0070062 (extracel…			0.880398	0.930296		-0.158234	-0.0018831	-0.193425		-0.805401	-0.467204	-0.184547					353.557	51.579	26.9519	-1.46094	4.45446	42.9514	3.06503e-05	0.0128431	1.61126e-09	0.0685251	0.23887	-0.869318	-0.905179	0.00504681	0.00198262		38.1396	39.5521	17.5395	19.7761	17.0686	10.4766	13.7726	17.1863
ENSG00000174021	GNG5	PC	G protein subunit gamma 5	G proteins are trimeric (alpha-beta-gamma) membrane-associated proteins that regulate flow of information from cell surface receptors to a variety of internal metabolic effectors. Interaction of a G protein with its activated receptor promotes exchange of GTP for GDP that is bound to the alpha subunit. The alpha-GTP complex dissociates from the beta-gamma heterodimer so that the subunits, in turn…	hsa04014 (Ras signaling pathway), hsa04062 (Chemokine signaling pathway), hsa04151 (PI3K-Akt signaling pathway), hsa04371 (Apelin signaling pathway), hsa04713 (Circadian entrainment), hsa04723 (Retrograde endocannabinoid signaling), hsa04724 (Glutamatergic synapse), hsa04725 (Cholinergic synapse), hsa04726 (Serotonergic synapse), hsa04727 (GABAergic synapse), hsa04728 (Dopaminergic synapse), hsa0…			0.628277	0.907327		-0.243904	-0.109631	-0.155644		-0.464577	-0.315359	-0.246489					353.398	95.9774	11.1601	-1.06991	8.3565	40.3467	4.10178e-05	0.0142255	5.81222e-09	0.0439369	0.23887	-0.944911	-0.865384	0.000400878	0.00549944		479.57	582.335	261.091	286.753	277.689	223.776	248.378	260.62
ENSG00000274177	AC004528.2	As						0.324475	0.633884		0.109679	0.18946	-0.000584749		-0.514436	-0.300557	-0.44192					351.399	61.2474	2.58491	-0.971245	4.99817	40.0087	4.2645e-05	0.0142255	8.62558e-08	0.0439369	0.23887	-0.944911	-0.945606	0.000400878	0.000386101		38.8458	48.6162	33.1955	35.1967	30.6058	20.8355	24.4847	22.0126
ENSG00000114686	MRPL3	PC	mitochondrial ribosomal protein L3	Mammalian mitochondrial ribosomal proteins are encoded by nuclear genes and help in protein synthesis within the mitochondrion. Mitochondrial ribosomes (mitoribosomes) consist of a small 28S subunit and a large 39S subunit. They have an estimated 75% protein to rRNA composition compared to prokaryotic ribosomes, where this ratio is reversed. Another difference between mammalian mitoribosomes and …	hsa03010 (Ribosome), GO:0006412 (translation), GO:0070125 (mitochondrial translational elongation), GO:0070126 (mitochondrial translational termination), GO:0005743 (mitochondrial inner membrane), GO:0005762 (mitochondrial large ribosomal subunit), GO:0003723 (RNA binding), GO:0003735 (structural constituent of ribosome), R-HSA-1852241 (Homo sapiens: Organelle biogenesis and maintenance), R-HSA-5…			0.703485	0.7332		-0.162332	-0.128183	-0.150859		-0.50165	-0.245304	-0.248357					348.191	77.7964	18.0944	-1.03298	6.07607	39.468	4.54078e-05	0.0142255	1.8846e-08	0.0439369	0.23887	-0.944911	-0.891866	0.000400878	0.00291018		105.472	107.709	56.9739	58.3865	57.4448	44.6139	53.6779	53.5602
ENSG00000198464	ZNF480	PC	zinc finger protein 480		GO:0006351 (transcription, DNA-templated), GO:0006355 (regulation of transcription, DNA-templated), GO:0005654 (nucleoplasm), GO:0005829 (cytosol), GO:0003676 (nucleic acid binding), GO:0046872 (metal ion binding), R-HSA-212436 (Homo sapiens: Generic Transcription Pathway), R-HSA-74160 (Homo sapiens: Gene Expression)			0.799633	0.600832		0.163712	-0.214865	0.0239651		-0.335183	-0.501231	-0.536863					345.703	14.5025	82.8408	-1.60555	2.44475	39.0503	4.76861e-05	0.0142255	1.77939e-08	0.0439369	0.23887	-0.944911	-0.938802	0.000400878	0.000547007		9.88803	8.35774	5.65031	3.88458	4.94402	3.41373	2.82515	2.70744
ENSG00000131051	RBM39	PC	RNA binding motif protein 39	This gene encodes a member of the U2AF65 family of proteins. The encoded protein is found in the nucleus, where it co-localizes with core spliceosomal proteins. It has been shown to play a role in both steroid hormone receptor-mediated transcription and alternative splicing, and it is also a transcriptional coregulator of the viral oncoprotein v-Rel. Multiple transcript variants have been observe…	GO:0006351 (transcription, DNA-templated), GO:0006355 (regulation of transcription, DNA-templated), GO:0006396 (RNA processing), GO:0006397 (mRNA processing), GO:0008380 (RNA splicing), GO:0005654 (nucleoplasm), GO:0005815 (microtubule organizing center), GO:0015630 (microtubule cytoskeleton), GO:0016607 (nuclear speck), GO:0003723 (RNA binding), GO:0005515 (protein binding)			0.878444	1.00056		-0.352345	-0.0960391	-0.163772		-0.64513	-0.349249	-0.272467					342.953	89.9876	40.7499	-1.31587	7.23304	43.9213	2.75986e-05	0.0128431	6.29148e-10	0.0956344	0.23887	-0.793725	-0.876287	0.0186875	0.00430519		255.205	277.924	107.591	128.898	122.894	87.462	107.827	113.83
ENSG00000189376	C8orf76	PC	chromosome 8 open reading frame 76					-0.544844	-0.52692		-0.312157	0.0640263	-0.0723067		0.464234	0.490871	0.437096					341.964	36.4238	11.7512	1.19188	3.64638	38.4257	5.13487e-05	0.0144793	8.67401e-08	0.0439369	0.23887	0.944911	0.961665	0.000400878	0.000136825		7.41603	7.53374	9.06403	12.36	11.0652	16.9509	17.3041	16.5978
ENSG00000128708	HAT1	PC	histone acetyltransferase 1	The protein encoded by this gene is a type B histone acetyltransferase (HAT) that is involved in the rapid acetylation of newly synthesized cytoplasmic histones, which are in turn imported into the nucleus for de novo deposition onto nascent DNA chains. Histone acetylation, particularly of histone H4, plays an important role in replication-dependent chromatin assembly. Specifically, this HAT can …	hsa05034 (Alcoholism), GO:0006323 (DNA packaging), GO:0006335 (DNA replication-dependent nucleosome assembly), GO:0006336 (DNA replication-independent nucleosome assembly), GO:0006348 (chromatin silencing at telomere), GO:0006475 (internal protein amino acid acetylation), GO:0007584 (response to nutrient), GO:0043967 (histone H4 acetylation), GO:0000784 (nuclear chromosome, telomeric region), GO:…			1.39188	0.935786		-0.40249	-0.324597	-0.237485		-0.421571	-0.438746	-0.502779					341.466	87.1736	77.371	-1.58925	6.90542	38.3426	5.186e-05	0.0144793	2.74585e-09	0.0439369	0.23887	-0.944911	-0.826486	0.000400878	0.0114195		277.689	201.881	78.6334	83.1066	88.4037	77.574	76.6323	73.2185
ENSG00000113811	SELENOK	PC	selenoprotein K	This gene encodes a selenoprotein, which contains a selenocysteine (Sec) residue at its active site. The selenocysteine is encoded by the UGA codon that normally signals translation termination. The 3_ UTR of selenoprotein genes have a common stem-loop structure, the sec insertion sequence (SECIS), that is necessary for the recognition of UGA as a Sec codon rather than as a stop signal. This sele…	GO:0002376 (immune system process), GO:0006816 (calcium ion transport), GO:0006979 (response to oxidative stress), GO:0032469 (endoplasmic reticulum calcium ion homeostasis), GO:0070059 (intrinsic apoptotic signaling pathway in response to endoplasmic reticulum stress), GO:0005783 (endoplasmic reticulum), GO:0005789 (endoplasmic reticulum membrane), GO:0005794 (Golgi apparatus), GO:0005886 (plasm…			-0.47406	-0.310888		0.0843222	-0.03126	-0.0863845		0.273533	0.31454	0.230198					340.003	88.0116	12.8275	0.665895	7.00794	38.0993	5.33932e-05	0.0144793	6.84941e-07	0.0439369	0.23887	0.944911	0.972761	0.000400878	4.94978e-05		90.4049	101.47	134.077	123.6	118.892	153.147	157.62	148.556
ENSG00000258644	SYNJ2BP-COX16	PC	SYNJ2BP-COX16 readthrough	This locus represents naturally occurring read-through transcription between the neighboring SYNJ2BP (synaptojanin 2 binding protein) and COX16 (COX16 cytochrome c oxidase assembly homolog (S. cerevisiae)) genes on chromosome 14. The read-through transcript produces a fusion protein that shares sequence identity with each individual gene product. Alternate splicing results in multiple transcript …				-0.35093	-0.649593		-0.0304052	-0.143694	-0.109557		0.732261	0.312414	0.239504					338.588	83.7509	6.15792	0.97049	6.5579	37.8644	5.49231e-05	0.0144793	5.57757e-08	0.0439369	0.23887	0.944911	0.872963	0.000400878	0.0046495		70.3934	56.8562	88.4037	81.5763	83.5774	151.381	112.653	107.003
ENSG00000162086	ZNF75A	PC	zinc finger protein 75a		GO:0006351 (transcription, DNA-templated), GO:0006355 (regulation of transcription, DNA-templated), GO:0008150 (biological_process), GO:0005634 (nucleus), GO:0003674 (molecular_function), GO:0003677 (DNA binding), GO:0046872 (metal ion binding), R-HSA-212436 (Homo sapiens: Generic Transcription Pathway), R-HSA-74160 (Homo sapiens: Gene Expression)			0.932051	0.734742		0.0365943	-0.315949	0.00600382		-0.508612	-0.680397	-0.204432					335.947	43.1104	52.9687	-1.42415	3.98884	39.8145	4.3614e-05	0.0142255	8.44935e-09	0.0685251	0.23887	-0.869318	-0.904781	0.00504681	0.00200709		29.311	25.3087	14.8321	11.1829	14.4789	9.53489	8.24003	12.2423
ENSG00000269972	AC004542.1	lincRNA						0.743488	0.731157		-0.077792	-0.0245462	-0.144395		-0.657393	-0.391633	-0.178886					333.86	42.7576	0.98809	-1.25026	3.97136	37.0832	6.03964e-05	0.0152145	4.39194e-08	0.0439369	0.23887	-0.944911	-0.919405	0.000400878	0.00123095		25.6618	25.4264	13.6549	14.2435	12.9486	8.47546	10.5943	12.5955
ENSG00000139921	TMX1	PC	thioredoxin related transmembrane protein 1	TXNDC1 is a thioredoxin (TXN; see MIM 187700)-related protein with disulfide reductase activity (Matsuo et al., 2001 [PubMed 11152479]).[supplied by OMIM, Mar 2008]. Sequence Note: This RefSeq record was created from transcript and genomic sequence data to make the sequence consistent with the reference genome assembly. The genomic coordinates used for the transcript record were based on transcri…	GO:0006457 (protein folding), GO:0034976 (response to endoplasmic reticulum stress), GO:0045454 (cell redox homeostasis), GO:0055114 (oxidation-reduction process), GO:0005789 (endoplasmic reticulum membrane), GO:0016021 (integral component of membrane), GO:0003756 (protein disulfide isomerase activity), GO:0015036 (disulfide oxidoreductase activity)			-1.12134	-0.932855		0.166835	-0.104495	-0.155127		1.29815	0.738035	0.110795					331.844	32.8246	81.4468	2.24898	3.43497	39.0952	4.74348e-05	0.0142255	4.09051e-09	0.0685251	0.23887	0.869318	0.809936	0.00504681	0.014811		3.06058	3.76687	10.3589	8.24003	7.88688	25.0732	16.3623	9.88803
ENSG00000188610	FAM72B	PC	family with sequence similarity 72 member B		GO:0005829 (cytosol), GO:0043231 (intracellular membrane-bounded organelle)			0.829222	0.862016		0.0585897	-0.187622	0.141067		-0.328519	-0.970267	-0.404487					330.901	9.58892	33.7715	-2.08613	2.16603	36.5971	6.41241e-05	0.0155212	9.25793e-10	0.0439369	0.23887	-0.944911	-0.942242	0.000400878	0.000461082		8.24003	8.47546	4.0023	3.06058	4.35544	2.58972	0.941718	2.35429
ENSG00000129636	ITFG1	PC	integrin alpha FG-GAP repeat containing 1		GO:0016021 (integral component of membrane), GO:0070062 (extracellular vesicular exosome)			0.584984	0.819236		-0.049063	-0.140363	-0.125935		-0.464123	-0.455077	-0.169659					330.727	55.1341	50.7455	-1.1129	4.66324	36.5685	6.4352e-05	0.0155212	8.48613e-08	0.0439369	0.23887	-0.944911	-0.895983	0.000400878	0.00259863		36.727	43.5544	22.9544	21.4241	21.6595	16.7155	16.8332	20.9532
ENSG00000179958	DCTPP1	PC	dCTP pyrophosphatase 1		hsa00240 (Pyrimidine metabolism), hsa01100 (Metabolic pathways), GO:0006253 (dCTP catabolic process), GO:0009143 (nucleoside triphosphate catabolic process), GO:0042262 (DNA protection), GO:0051289 (protein homotetramerization), GO:0005634 (nucleus), GO:0005739 (mitochondrion), GO:0005829 (cytosol), GO:0000287 (magnesium ion binding), GO:0005515 (protein binding), GO:0032556 (pyrimidine deoxyribo…			-0.44988	-0.364605		0.0729519	-0.095212	0.0408508		0.343416	0.292824	0.159654					328.188	88.9644	17.8386	0.671166	7.10735	36.1533	6.77656e-05	0.0156774	1.02131e-06	0.0439369	0.23887	0.944911	0.957342	0.000400878	0.000187905		98.5272	104.648	142.435	126.543	139.256	172.217	166.213	151.381
ENSG00000161202	DVL3	PC	dishevelled segment polarity protein 3	This gene is a member of a multi-gene family which shares strong similarity with the Drosophila dishevelled gene, dsh. The Drosophila dishevelled gene encodes a cytoplasmic phosphoprotein that regulates cell proliferation. [provided by RefSeq, Jul 2008]. Publication Note: This RefSeq record includes a subset of the publications that are available for this gene. Please see the Gene record to acces…	hsa04150 (mTOR signaling pathway), hsa04310 (Wnt signaling pathway), hsa04330 (Notch signaling pathway), hsa04390 (Hippo signaling pathway), hsa04550 (Signaling pathways regulating pluripotency of stem cells), hsa04916 (Melanogenesis), hsa04934 (Cushing syndrome), hsa05165 (Human papillomavirus infection), hsa05200 (Pathways in cancer), hsa05217 (Basal cell carcinoma), hsa05224 (Breast cancer), h…			0.9783	1.09626		-0.439459	-0.100396	-0.271923		-0.477644	-0.439459	-0.345674					326.262	69.4425	60.3882	-1.46276	5.50956	39.227	4.67063e-05	0.0142255	4.182e-09	0.0796494	0.23887	-0.836516	-0.861147	0.00962802	0.00601513		82.2826	89.4632	29.5464	37.9041	33.431	28.7224	29.5464	31.6653
ENSG00000039123	MTREX	PC	Mtr4 exosome RNA helicase		hsa03018 (RNA degradation), GO:0000398 (mRNA splicing, via spliceosome), GO:0000460 (maturation of 5.8S rRNA), GO:0006364 (rRNA processing), GO:0006401 (RNA catabolic process), GO:0000178 (exosome (RNase complex)), GO:0005634 (nucleus), GO:0005654 (nucleoplasm), GO:0005730 (nucleolus), GO:0071013 (catalytic step 2 spliceosome), GO:0003723 (RNA binding), GO:0004004 (ATP-dependent RNA helicase acti…			0.838126	0.548596		0.0974413	0.0974413	-0.275655		-0.451535	-0.348423	-0.505992					325.202	22.38	52.0335	-1.43987	2.88778	35.5089	7.34931e-05	0.0160215	9.07351e-08	0.0423134	0.23887	-0.950586	-0.918358	0.000290566	0.00127851		13.5372	10.712	7.29831	7.29831	5.17945	4.35544	4.8263	4.12001
ENSG00000181588	MEX3D	PC	mex-3 RNA binding family member D		GO:0010609 (mRNA localization resulting in posttranscriptional regulation of gene expression), GO:0061157 (mRNA destabilization), GO:0005634 (nucleus), GO:0048471 (perinuclear region of cytoplasm), GO:0003723 (RNA binding), GO:0008270 (zinc ion binding), GO:0017091 (AU-rich element binding)			-0.545626	-0.581925		0.00612772	0.16241	-0.0756189		0.385593	0.380886	0.268153					324.878	56.5279	83.6436	0.954849	4.73991	35.6141	7.252e-05	0.0160215	4.9406e-07	0.0439369	0.23887	0.944911	0.969739	0.000400878	6.77118e-05		16.9509	16.4801	25.7795	28.9578	24.2492	34.1373	34.0195	31.3121
ENSG00000242697	RPL5P12	p_Pg	ribosomal protein L5 pseudogene 12					2.22279	0.951541		-0.582012	-0.215188	-0.454885		-0.680206	-0.660025	-0.582012					323.633	43.7456	15.2007	-2.67289	4.02581	36.3381	6.62209e-05	0.0156392	4.38663e-09	0.0537348	0.23887	-0.912563	-0.73076	0.00156352	0.0394709		60.5054	23.8961	6.94517	9.53489	7.76917	6.35659	6.47431	6.94517
ENSG00000017260	ATP2C1	PC	ATPase secretory pathway Ca2+ transporting 1	The protein encoded by this gene belongs to the family of P-type cation transport ATPases. This magnesium-dependent enzyme catalyzes the hydrolysis of ATP coupled with the transport of calcium ions. Defects in this gene cause Hailey-Hailey disease, an autosomal dominant disorder. Alternatively spliced transcript variants encoding different isoforms have been identified. [provided by RefSeq, Aug 2…	GO:0006816 (calcium ion transport), GO:0006874 (cellular calcium ion homeostasis), GO:0007165 (signal transduction), GO:0008544 (epidermis development), GO:0016339 (calcium-dependent cell-cell adhesion via plasma membrane cell adhesion molecules), GO:0031532 (actin cytoskeleton reorganization), GO:0032468 (Golgi calcium ion homeostasis), GO:0032472 (Golgi calcium ion transport), GO:0034220 (ion t…			0.68407	1.19256		-0.161975	-0.236947	0.00999732		-0.710951	-0.558922	-0.217836					323.596	29.6665	85.9285	-1.72217	3.27312	37.6631	5.6276e-05	0.0144987	1.35756e-08	0.0685251	0.23887	-0.869318	-0.857793	0.00504681	0.0064446		14.7143	21.7772	7.29831	6.82745	8.47546	4.35544	5.06173	6.94517
ENSG00000137575	SDCBP	PC	syndecan binding protein	The protein encoded by this gene was initially identified as a molecule linking syndecan-mediated signaling to the cytoskeleton. The syntenin protein contains tandemly repeated PDZ domains that bind the cytoplasmic, C-terminal domains of a variety of transmembrane proteins. This protein may also affect cytoskeletal-membrane organization, cell adhesion, protein trafficking, and the activation of t…	GO:0002091 (negative regulation of receptor internalization), GO:0006612 (protein targeting to membrane), GO:0006930 (substrate-dependent cell migration, cell extension), GO:0007268 (synaptic transmission), GO:0007346 (regulation of mitotic cell cycle), GO:0008284 (positive regulation of cell proliferation), GO:0010718 (positive regulation of epithelial to mesenchymal transition), GO:0010862 (pos…			0.436945	0.643252		-0.0712044	-0.0547515	-0.132471		-0.42186	-0.259867	-0.140044					321.319	91.6108	49.1222	-0.791441	7.45736	35.0375	7.80439e-05	0.0164673	2.67906e-07	0.0439369	0.23887	-0.944911	-0.892477	0.000400878	0.00286255		231.545	267.448	162.211	164.094	155.383	126.779	142.082	154.559
ENSG00000213977	TAX1BP3	PC	Tax1 binding protein 3		GO:0007266 (Rho protein signal transduction), GO:0008285 (negative regulation of cell proliferation), GO:0016055 (Wnt signaling pathway), GO:0030178 (negative regulation of Wnt signaling pathway), GO:0090630 (NA), GO:2000009 (negative regulation of protein localization to cell surface), GO:0001650 (fibrillar center), GO:0005737 (cytoplasm), GO:0005829 (cytosol), GO:0005886 (plasma membrane), GO:0…			-0.415549	-0.553058		-0.0676123	-0.2012	-0.0336639		0.712875	0.317689	0.240519					320.632	63.9732	44.7375	0.99105	5.16426	34.9265	7.91627e-05	0.0164673	3.10628e-07	0.0439369	0.23887	0.944911	0.88137	0.000400878	0.00381123		25.1909	22.7189	32.607	29.5464	33.431	57.4448	43.2013	40.847
ENSG00000106399	RPA3	PC	replication protein A3		hsa03030 (DNA replication), hsa03420 (Nucleotide excision repair), hsa03430 (Mismatch repair), hsa03440 (Homologous recombination), hsa03460 (Fanconi anemia pathway), GO:0000082 (G1/S transition of mitotic cell cycle), GO:0000722 (telomere maintenance via recombination), GO:0000724 (double-strand break repair via homologous recombination), GO:0006260 (DNA replication), GO:0006283 (transcription-c…			-0.24329	-0.517717		0.0169337	-0.158444	-0.110112		0.48692	0.25044	0.275269					320.187	88.2939	16.6123	0.73734	7.04747	34.8548	7.98958e-05	0.0164673	6.29088e-07	0.0439369	0.23887	0.944911	0.921682	0.000400878	0.00113151		108.768	89.5809	130.663	115.478	119.48	181.751	153.971	156.678
ENSG00000266412	NCOA4	PC	nuclear receptor coactivator 4	This gene encodes an androgen receptor coactivator. The encoded protein interacts with the androgen receptor in a ligand-dependent manner to enhance its transcriptional activity. Chromosomal translocations between this gene and the ret tyrosine kinase gene, also located on chromosome 10, have been associated with papillary thyroid carcinoma. Alternatively spliced transcript variants have been des…	hsa04216 (Ferroptosis), hsa05200 (Pathways in cancer), hsa05216 (Thyroid cancer), GO:0006351 (transcription, DNA-templated), GO:0006622 (protein targeting to lysosome), GO:0008584 (male gonad development), GO:0030521 (androgen receptor signaling pathway), GO:0045893 (positive regulation of transcription, DNA-templated), GO:0005634 (nucleus), GO:0044754 (autolysosome), GO:0003713 (transcription co…			0.627048	0.644038		-0.19499	-0.182456	-0.0175286		-0.432573	-0.238441	-0.205097					318.385	80.6987	84.5611	-0.908108	6.29274	34.5644	8.29463e-05	0.0167907	1.86485e-07	0.0439369	0.23887	-0.944911	-0.889733	0.000400878	0.00308071		117.244	118.656	65.4494	66.0379	74.278	55.2082	63.4482	64.9785
ENSG00000136156	ITM2B	PC	integral membrane protein 2B	Amyloid precursor proteins are processed by beta-secretase and gamma-secretase to produce beta-amyloid peptides which form the characteristic plaques of Alzheimer disease. This gene encodes a transmembrane protein which is processed at the C-terminus by furin or furin-like proteases to produce a small secreted peptide which inhibits the deposition of beta-amyloid. Mutations which result in extens…	GO:0007399 (nervous system development), GO:0042985 (negative regulation of amyloid precursor protein biosynthetic process), GO:0044267 (cellular protein metabolic process), GO:0000139 (Golgi membrane), GO:0005576 (extracellular region), GO:0005615 (extracellular space), GO:0005794 (Golgi apparatus), GO:0005886 (plasma membrane), GO:0010008 (endosome membrane), GO:0016020 (membrane), GO:0030660 (…			0.707926	0.881956		-0.15583	-0.0613181	-0.252729		-0.637044	-0.24148	-0.24148					318.13	90.0053	90.869	-1.12699	7.23501	39.1119	4.7342e-05	0.0142255	8.41398e-09	0.0929678	0.23887	-0.798493	-0.878328	0.0174888	0.00410217		232.133	262.151	126.661	135.372	118.303	90.1695	119.245	119.245
ENSG00000166200	COPS2	PC	COP9 signalosome subunit 2		GO:0000122 (negative regulation of transcription from RNA polymerase II promoter), GO:0000338 (protein deneddylation), GO:0000715 (nucleotide-excision repair, DNA damage recognition), GO:0006283 (transcription-coupled nucleotide-excision repair), GO:0006366 (transcription from RNA polymerase II promoter), GO:0007165 (signal transduction), GO:0008283 (cell proliferation), GO:0022008 (neurogenesis)…			0.493652	0.761641		-0.138186	0.0312318	-0.204205		-0.394791	-0.213888	-0.335454					312.635	66.7167	61.8968	-0.959707	5.33596	33.6437	9.35629e-05	0.0173874	3.29428e-07	0.0439369	0.23887	-0.944911	-0.884285	0.000400878	0.00354515		55.0905	66.7442	34.8436	39.4344	33.1955	28.8401	32.9601	30.135
ENSG00000115239	ASB3	PC	ankyrin repeat and SOCS box containing 3	This locus represents naturally occurring read-through transcription between the neighboring GPR75 (G protein-coupled receptor 75) and ASB3 (ankyrin repeat and SOCS box containing 3) on chromosome 2. The transcript includes exons from both GPR75 and ASB3 and translation initiates in the 5_ non-coding exon of GPR75. The resulting protein has a novel N-terminus but is otherwise identical to that en…	GO:0016567 (protein ubiquitination), GO:0035556 (intracellular signal transduction), GO:0000151 (ubiquitin ligase complex), GO:0005634 (nucleus), GO:0005737 (cytoplasm), GO:0004842 (ubiquitin-protein transferase activity), GO:0005515 (protein binding), GO:0031625 (ubiquitin protein ligase binding), R-HSA-1280218 (Homo sapiens: Adaptive Immune System), R-HSA-168256 (Homo sapiens: Immune System), R…			0.827181	1.09023		-0.297792	-0.376655	0.0424689		-0.328822	-0.530479	-0.42613					312.075	37.6941	36.4182	-1.56218	3.71265	35.6926	7.18042e-05	0.0160215	3.30174e-08	0.0685251	0.23887	-0.869318	-0.865152	0.00504681	0.00552688		22.1304	26.9567	9.06403	8.47546	12.0069	8.8286	7.41603	8.12231
ENSG00000071082	RPL31	PC	ribosomal protein L31	Ribosomes, the organelles that catalyze protein synthesis, consist of a small 40S subunit and a large 60S subunit. Together these subunits are composed of 4 RNA species and approximately 80 structurally distinct proteins. This gene encodes a ribosomal protein that is a component of the 60S subunit. The protein belongs to the L31E family of ribosomal proteins. It is located in the cytoplasm. Highe…	hsa03010 (Ribosome), GO:0000184 (nuclear-transcribed mRNA catabolic process, nonsense-mediated decay), GO:0006364 (rRNA processing), GO:0006412 (translation), GO:0006413 (translational initiation), GO:0006614 (SRP-dependent cotranslational protein targeting to membrane), GO:0019083 (viral transcription), GO:0005829 (cytosol), GO:0005925 (focal adhesion), GO:0016020 (membrane), GO:0022625 (cytosol…			-0.363728	-0.615021		0.134653	-0.0135569	0.0686871		0.36475	0.212108	0.212108					309.92	99.3207	23.1319	0.72118	10.4308	33.0647	0.000101055	0.0176201	9.52874e-07	0.0423134	0.23887	0.950586	0.935715	0.000290566	0.000632537		1049.54	881.448	1483.44	1338.42	1417.05	1740.29	1565.37	1565.37
ENSG00000122483	CCDC18	PC	coiled-coil domain containing 18					0.920011	0.706593		-0.25228	-0.0444489	-0.212198		-0.33595	-0.402049	-0.379678					308.492	27.1524	76.127	-1.4213	3.14218	32.9853	0.000102137	0.0176201	1.70619e-07	0.0439369	0.23887	-0.944911	-0.880757	0.000400878	0.00386871		16.8332	14.2435	6.35659	7.65146	6.59202	5.88573	5.53259	5.65031
ENSG00000038210	PI4K2B	PC	phosphatidylinositol 4-kinase type 2 beta	Phosphatidylinositol 4-kinases (PI4Ks) phosphorylate phosphatidylinositol to generate phosphatidylinositol 4-phosphate (PIP), an immediate precursor of several important signaling and scaffolding molecules. PIP itself may also have direct functional and structural roles. PI4K2B is a primarily cytosolic PI4K that is recruited to membranes, where it stimulates phosphatidylinositol 4,5-bisphosphate …	hsa00562 (Inositol phosphate metabolism), hsa01100 (Metabolic pathways), hsa04070 (Phosphatidylinositol signaling system), GO:0006661 (phosphatidylinositol biosynthetic process), GO:0007030 (Golgi organization), GO:0007032 (endosome organization), GO:0046854 (phosphatidylinositol phosphorylation), GO:0005768 (endosome), GO:0005802 (trans-Golgi network), GO:0005829 (cytosol), GO:0005886 (plasma me…			-0.672422	-0.271864		0.0210563	-0.140614	-0.0361411		0.384204	0.388162	0.327619					306.287	61.2738	93.9215	0.8812	4.99884	32.6366	0.000107049	0.0176201	9.66021e-07	0.0439369	0.23887	0.944911	0.962463	0.000400878	0.000128527		18.5989	25.1909	31.3121	27.7807	30.0172	40.847	40.9647	39.199
ENSG00000095139	ARCN1	PC	archain 1	This gene maps in a region, which include the mixed lineage leukemia and Friend leukemia virus integration 1 genes, where multiple disease-associated chromosome translocations occur. It is an intracellular protein. Archain sequences are well conserved among eukaryotes and this protein may play a fundamental role in eukaryotic cell biology. It has similarities to heat shock proteins and clathrin-a…	GO:0006886 (intracellular protein transport), GO:0006888 (ER to Golgi vesicle-mediated transport), GO:0006890 (retrograde vesicle-mediated transport, Golgi to ER), GO:0008344 (adult locomotory behavior), GO:0021691 (cerebellar Purkinje cell layer maturation), GO:0043473 (pigmentation), GO:0000139 (Golgi membrane), GO:0005789 (endoplasmic reticulum membrane), GO:0005829 (cytosol), GO:0016020 (memb…			0.475267	0.422958		0.119405	0.0113642	-0.103295		-0.53477	-0.246566	-0.144364					305.614	82.2071	86.8902	-0.756994	6.42487	32.5305	0.000108599	0.0176201	1.10705e-06	0.0439369	0.23887	-0.944911	-0.936736	0.000400878	0.00060336		117.008	112.771	90.9935	84.2837	77.6917	57.0916	70.158	75.4551
ENSG00000196510	ANAPC7	PC	anaphase promoting complex subunit 7	This gene encodes a tetratricopeptide repeat containing component of the anaphase promoting complex/cyclosome (APC/C), a large E3 ubiquitin ligase that controls cell cycle progression by targeting a number of cell cycle regulators such as B-type cyclins for 26S proteasome-mediated degradation through ubiquitination. The encoded protein is required for proper protein ubiquitination function of APC…	hsa04110 (Cell cycle), hsa04114 (Oocyte meiosis), hsa04120 (Ubiquitin mediated proteolysis), hsa04914 (Progesterone-mediated oocyte maturation), hsa05166 (Human T-cell leukemia virus 1 infection), GO:0007067 (mitotic nuclear division), GO:0031145 (anaphase-promoting complex-dependent proteasomal ubiquitin-dependent protein catabolic process), GO:0042787 (protein ubiquitination involved in ubiquit…			-0.334105	-0.618257		-0.0105583	-0.0663704	0.0244379		0.334378	0.519718	0.150757					304.211	72.7594	38.6678	0.836444	5.72193	32.3094	0.000111913	0.0176201	1.25073e-06	0.0439369	0.23887	0.944911	0.92176	0.000400878	0.0011282		40.1407	32.607	50.735	48.7339	52.0299	64.9785	74.1603	56.9739
ENSG00000141452	RMC1	PC	regulator of MON1-CCZ1	This gene encodes a colon cancer associated protein. [provided by RefSeq, Jan 2013].	GO:0005765 (lysosomal membrane)			0.761475	0.586288		-0.259705	0.0164689	-0.154091		-0.259705	-0.400262	-0.290469					303.87	62.0413	30.7896	-1.01319	5.04907	33.0988	0.000100595	0.0176201	3.29137e-07	0.0537348	0.23887	-0.912563	-0.885682	0.00156352	0.00342206		54.6196	48.1453	25.8972	31.783	28.0161	25.8972	23.3075	25.3087
ENSG00000266993	AL050343.1	As						0.604531	0.878109		0.0392135	-0.303419	0.00358668		-0.427611	-0.230899	-0.56351					303.815	37.7823	11.116	-1.29732	3.7175	34.3017	8.58251e-05	0.016956	1.26103e-07	0.0685251	0.23887	-0.869318	-0.89653	0.00504681	0.0025589		19.4229	23.8961	12.4778	9.41718	12.1246	8.47546	10.0057	7.53374
ENSG00000198786	MT-ND5	PC	mitochondrially encoded NADH:ubiquinone oxidoreductase core subunit 5		hsa00190 (Oxidative phosphorylation), hsa01100 (Metabolic pathways), hsa04714 (Thermogenesis), hsa04723 (Retrograde endocannabinoid signaling), hsa05012 (Parkinson disease), R-HSA-1428517 (Homo sapiens: The citric acid (TCA) cycle and respiratory electron transport), R-HSA-1430728 (Homo sapiens: Metabolism), R-HSA-163200 (Homo sapiens: Respiratory electron transport, ATP synthesis by chemiosmotic…			0.524258	0.871573		-0.0265555	0.209699	-0.281035		-0.745256	-0.439411	-0.113273					300.981	99.753	67.1107	-1.09458	11.1991	33.8286	9.13079e-05	0.0172511	7.30464e-08	0.0685251	0.23887	-0.869318	-0.8766	0.00504681	0.00427361		3187.48	4055.62	2175.25	2562.65	1823.17	1320.99	1633.41	2048.24
ENSG00000270898	GPR75-ASB3	PC	GPR75-ASB3 readthrough	This locus represents naturally occurring read-through transcription between the neighboring GPR75 (G protein-coupled receptor 75) and ASB3 (ankyrin repeat and SOCS box containing 3) on chromosome 2. The transcript includes exons from both GPR75 and ASB3 and translation initiates in the 5_ non-coding exon of GPR75. The resulting protein has a novel N-terminus but is otherwise identical to that en…				0.410725	0.615097		0.0965914	0.122357	0.03009		-0.610442	-0.375946	-0.288472					299.725	33.054	32.3335	-1.11995	3.44475	31.6061	0.00012327	0.0188041	9.11453e-07	0.0439369	0.23887	-0.944911	-0.967157	0.000400878	8.63994e-05		14.2435	16.7155	11.0652	11.3006	10.4766	6.00345	7.41603	8.0046
ENSG00000065559	MAP2K4	PC	mitogen-activated protein kinase kinase 4	This gene encodes a member of the mitogen-activated protein kinase (MAPK) family. Members of this family act as an integration point for multiple biochemical signals and are involved in a wide variety of cellular processes such as proliferation, differentiation, transcription regulation, and development. They form a three-tiered signaling module composed of MAPKKKs, MAPKKs, and MAPKs. This protei…	hsa04010 (MAPK signaling pathway), hsa04012 (ErbB signaling pathway), hsa04620 (Toll-like receptor signaling pathway), hsa04664 (Fc epsilon RI signaling pathway), hsa04668 (TNF signaling pathway), hsa04912 (GnRH signaling pathway), hsa04926 (Relaxin signaling pathway), hsa05120 (Epithelial cell signaling in Helicobacter pylori infection), hsa05142 (Chagas disease (American trypanosomiasis)), hsa0…			0.837626	0.514343		-0.233894	0.00452755	-0.0740111		-0.465729	-0.303162	-0.279701					298.684	44.5836	48.7781	-1.12272	4.06945	31.4436	0.000126083	0.0188063	6.88914e-07	0.0439369	0.23887	-0.944911	-0.883367	0.000400878	0.00362757		29.6641	23.3075	13.0663	15.7738	14.8321	10.8298	12.36	12.5955
ENSG00000128585	MKLN1	PC	muskelin 1	Muskelin is an intracellular protein that acts as a mediator of cell spreading and cytoskeletal responses to the extracellular matrix component thrombospondin I (MIM 188060) (Adams et al., 1998 [PubMed 9724633]).[supplied by OMIM, Mar 2008].	GO:0007160 (cell-matrix adhesion), GO:0007165 (signal transduction), GO:0008360 (regulation of cell shape), GO:0031532 (actin cytoskeleton reorganization), GO:0001726 (ruffle), GO:0005829 (cytosol), GO:0005938 (cell cortex)			0.477869	0.425939		0.10588	0.197226	-0.0534869		-0.465052	-0.344187	-0.344187					297.035	42.29	78.4385	-0.954864	3.94816	31.0487	0.000133239	0.019119	2.5157e-06	0.0423134	0.23887	-0.950586	-0.976986	0.000290566	2.99495e-05		21.3064	20.4824	16.0092	17.1863	14.1258	10.1235	11.1829	11.1829
ENSG00000113460	BRIX1	PC	BRX1, biogenesis of ribosomes		GO:0000027 (ribosomal large subunit assembly), GO:0005634 (nucleus), GO:0005730 (nucleolus), GO:0003723 (RNA binding)			1.1096	0.613586		-0.247421	-0.222631	-0.210394		-0.445437	-0.329737	-0.267564					296.946	82.0748	62.3114	-1.19872	6.40997	31.1729	0.000130938	0.0190297	1.68022e-07	0.0439369	0.23887	-0.944911	-0.816128	0.000400878	0.013477		171.981	121.364	65.9202	67.0974	67.686	57.2093	62.1534	64.9785
ENSG00000225630	MTND2P28	u_Pg	mitochondrially encoded NADH:ubiquinone oxidoreductase core subunit 2 pseudogene 28					1.53807	1.87272		-0.730249	-0.298787	-0.556776		-0.757136	-0.435423	-0.632419					295.292	96.2332	26.1579	-2.22474	8.45052	37.8868	5.47754e-05	0.0144793	1.1801e-09	0.119433	0.23887	-0.718132	-0.827466	0.0448173	0.0112358		765.852	966.32	157.385	212.946	177.749	154.442	193.523	168.567
ENSG00000064601	CTSA	PC	cathepsin A	This gene encodes a glycoprotein which associates with lysosomal enzymes beta-galactosidase and neuraminidase to form a complex of high molecular weight multimers. The formation of this complex provides a protective role for stability and activity. Deficiencies in this gene are linked to multiple forms of galactosialidosis. Alternatively spliced transcript variants encoding different isoforms hav…	hsa04142 (Lysosome), hsa04614 (Renin-angiotensin system), GO:0006508 (proteolysis), GO:0006687 (glycosphingolipid metabolic process), GO:0006886 (intracellular protein transport), GO:0031647 (regulation of protein stability), GO:0043085 (positive regulation of catalytic activity), GO:0043312 (neutrophil degranulation), GO:0051603 (proteolysis involved in cellular protein catabolic process), GO:19…			0.246988	0.405158		-0.0156949	0.0930859	-0.0492725		-0.296208	-0.156522	-0.227535					294.128	94.1867	29.7839	-0.55228	7.93287	30.7357	0.000139251	0.0192347	8.81721e-06	0.0439369	0.23887	-0.944911	-0.944749	0.000400878	0.000404376		286.518	319.949	238.49	257.324	232.957	195.995	216.124	205.648
ENSG00000090266	NDUFB2	PC	NADH:ubiquinone oxidoreductase subunit B2	The protein encoded by this gene is a subunit of the multisubunit NADH:ubiquinone oxidoreductase (complex I). Mammalian complex I is composed of 45 different subunits. This protein has NADH dehydrogenase activity and oxidoreductase activity. It plays a important role in transfering electrons from NADH to the respiratory chain. The immediate electron acceptor for the enzyme is believed to be ubiqu…	hsa00190 (Oxidative phosphorylation), hsa01100 (Metabolic pathways), hsa04714 (Thermogenesis), hsa04723 (Retrograde endocannabinoid signaling), hsa04932 (Non-alcoholic fatty liver disease (NAFLD)), hsa05010 (Alzheimer disease), hsa05012 (Parkinson disease), hsa05016 (Huntington disease), GO:0006120 (mitochondrial electron transport, NADH to ubiquinone), GO:0032981 (mitochondrial respiratory chain…			-0.333046	-0.455219		-0.0343191	-0.0243292	0.0804517		0.407618	0.273001	0.0858421					293.698	93.0399	7.75474	0.648659	7.71406	30.6691	0.000140572	0.0192347	4.04442e-06	0.0439369	0.23887	0.944911	0.918116	0.000400878	0.00128967		163.27	149.851	201.292	202.705	218.125	274.158	249.555	218.949
ENSG00000254087	LYN	PC	LYN proto-oncogene, Src family tyrosine kinase	This gene encodes a tyrosine protein kinase, which maybe involved in the regulation of mast cell degranulation, and erythroid differentiation. Alternatively spliced transcript variants encoding different isoforms have been found for this gene. [provided by RefSeq, Jul 2011].	hsa04062 (Chemokine signaling pathway), hsa04064 (NF-kappa B signaling pathway), hsa04611 (Platelet activation), hsa04662 (B cell receptor signaling pathway), hsa04664 (Fc epsilon RI signaling pathway), hsa04666 (Fc gamma R-mediated phagocytosis), hsa04730 (Long-term depression), hsa05120 (Epithelial cell signaling in Helicobacter pylori infection), hsa05167 (Kaposi sarcoma-associated herpesvirus…			0.628152	0.635276		0.102644	0.0179609	-0.176248		-0.726315	-0.405593	-0.0758779					292.895	70.0423	80.5029	-1.03512	5.54136	32.4911	0.000109181	0.0176201	2.50225e-07	0.0685251	0.23887	-0.869318	-0.917135	0.00504681	0.00133555		69.334	69.6871	47.5567	44.7316	38.8458	25.8972	32.8424	41.7887
ENSG00000139684	ESD	PC	esterase D	This gene encodes a serine hydrolase that belongs to the esterase D family. The encoded enzyme is active toward numerous substrates including O-acetylated sialic acids, and it may be involved in the recycling of sialic acids. This gene is used as a genetic marker for retinoblastoma and Wilson_s disease. [provided by RefSeq, Feb 2009]. Publication Note: This RefSeq record includes a subset of the …	hsa01200 (Carbon metabolism), GO:0008150 (biological_process), GO:0046294 (formaldehyde catabolic process), GO:1901687 (glutathione derivative biosynthetic process), GO:0005788 (endoplasmic reticulum lumen), GO:0031410 (cytoplasmic vesicle), GO:0070062 (extracellular vesicular exosome), GO:0005515 (protein binding), GO:0016788 (hydrolase activity, acting on ester bonds), GO:0018738 (S-formylgluta…			0.482081	0.633619		-0.176886	-0.0185272	-0.113003		-0.436496	-0.252305	-0.118481					292.883	94.1073	40.1059	-0.795411	7.91019	32.489	0.000109211	0.0176201	5.12397e-07	0.0685251	0.23887	-0.869318	-0.884739	0.00504681	0.00350483		326.423	362.797	206.001	230.132	215.418	171.746	195.406	214.594
ENSG00000166923	GREM1	PC	gremlin 1, DAN family BMP antagonist	This gene encodes a member of the BMP (bone morphogenic protein) antagonist family. Like BMPs, BMP antagonists contain cystine knots and typically form homo- and heterodimers. The CAN (cerberus and dan) subfamily of BMP antagonists, to which this gene belongs, is characterized by a C-terminal cystine knot with an eight-membered ring. The antagonistic effect of the secreted glycosylated protein en…	GO:0000902 (cell morphogenesis), GO:0001658 (branching involved in ureteric bud morphogenesis), GO:0002042 (cell migration involved in sprouting angiogenesis), GO:0002092 (positive regulation of receptor internalization), GO:0003257 (positive regulation of transcription from RNA polymerase II promoter involved in myocardial precursor cell differentiation), GO:0003337 (mesenchymal to epithelial tr…			0.39707	0.327872		0.128458	0.066502	-0.0406708		-0.470141	-0.273873	-0.135218					290.689	84.192	99.2236	-0.665056	6.60489	30.2048	0.000150192	0.0193475	4.75996e-06	0.0439369	0.23887	-0.944911	-0.951077	0.000400878	0.000282103		126.19	120.187	104.413	99.9398	92.6415	68.2745	78.5157	86.638
ENSG00000219928	AL161787.1	p_Pg						-0.551128	-0.588612		-0.16402	-0.0550656	0.0462351		0.655527	0.449052	0.208011					289.265	13.4704	0.785179	1.47887	2.3891	29.9858	0.000154996	0.0194798	1.42956e-06	0.0439369	0.23887	0.944911	0.922783	0.000400878	0.00108538		2.58972	2.47201	4.0023	4.47316	4.94402	8.59317	7.1806	5.76802
ENSG00000213516	RBMXL1	PC	RBMX like 1	This gene represents a retrogene of RNA binding motif protein, X-linked (RBMX), which is located on chromosome X. While all introns in the coding sequence have been processed out compared to the RBMX locus, the ORF is intact and there is specific evidence for transcription at this location. The preservation of the ORF by purifying selection in all Old World monkeys carrying it suggests that this …	hsa03040 (Spliceosome), GO:0006397 (mRNA processing), GO:0008380 (RNA splicing), GO:0005634 (nucleus), GO:0030529 (ribonucleoprotein complex), GO:0003723 (RNA binding)			0.690471	0.701787		-0.108471	-0.0888395	-0.0888395		-0.275951	-0.232224	-0.597934					289.15	24.2943	94.3802	-1.29569	2.99018	29.8355	0.000158398	0.0194798	5.91698e-07	0.0423134	0.23887	-0.950586	-0.915871	0.000290566	0.00139624		12.9486	13.0663	6.59202	6.70974	6.70974	5.65031	5.88573	4.12001
ENSG00000116679	IVNS1ABP	PC	influenza virus NS1A binding protein		hsa05164 (Influenza A), GO:0006383 (transcription from RNA polymerase III promoter), GO:0008380 (RNA splicing), GO:0009615 (response to virus), GO:2001243 (negative regulation of intrinsic apoptotic signaling pathway), GO:0005654 (nucleoplasm), GO:0005667 (transcription factor complex), GO:0005681 (spliceosomal complex), GO:0005829 (cytosol), GO:0015629 (actin cytoskeleton)			0.572013	0.447139		-0.166778	-0.127985	0.00952133		-0.273463	-0.244446	-0.216002					288.224	76.332	74.9713	-0.748469	5.97271	29.826	0.000158615	0.0194798	3.12983e-06	0.0439369	0.23887	-0.944911	-0.899359	0.000400878	0.00235989		91.6997	83.9306	54.1488	55.6791	61.4471	50.1465	51.2059	52.2653
ENSG00000155313	USP25	PC	ubiquitin specific peptidase 25	Ubiquitin (MIM 191339) is a highly conserved 76-amino acid protein involved in regulation of intracellular protein breakdown, cell cycle regulation, and stress response. Ubiquitin is released from degraded proteins by disassembly of the polyubiquitin chains, which is mediated by ubiquitin-specific proteases (USPs), such as USP25 (Valero et al., 1999 [PubMed 10644437]).[supplied by OMIM, Mar 2008].	hsa04657 (IL-17 signaling pathway), GO:0006464 (cellular protein modification process), GO:0006508 (proteolysis), GO:0006511 (ubiquitin-dependent protein catabolic process), GO:0016579 (protein deubiquitination), GO:0070536 (protein K63-linked deubiquitination), GO:0071108 (protein K48-linked deubiquitination), GO:1904293 (NA), GO:0005634 (nucleus), GO:0005783 (endoplasmic reticulum), GO:0005829 …			0.79353	0.698529		-0.058772	-0.124069	-0.0975947		-0.749745	-0.324387	-0.137491					287.063	37.3677	79.9912	-1.27393	3.6898	29.6483	0.000162757	0.0194798	5.07915e-07	0.0439369	0.23887	-0.944911	-0.902607	0.000400878	0.00214413		22.0126	20.4824	11.3006	10.712	10.9475	6.23888	9.06403	10.5943
ENSG00000142937	RPS8	PC	ribosomal protein S8	Ribosomes, the organelles that catalyze protein synthesis, consist of a small 40S subunit and a large 60S subunit. Together these subunits are composed of 4 RNA species and approximately 80 structurally distinct proteins. This gene encodes a ribosomal protein that is a component of the 40S subunit. The protein belongs to the S8E family of ribosomal proteins. It is located in the cytoplasm. Increa…	hsa03010 (Ribosome), GO:0000184 (nuclear-transcribed mRNA catabolic process, nonsense-mediated decay), GO:0000462 (maturation of SSU-rRNA from tricistronic rRNA transcript (SSU-rRNA, 5.8S rRNA, LSU-rRNA)), GO:0006364 (rRNA processing), GO:0006412 (translation), GO:0006413 (translational initiation), GO:0006614 (SRP-dependent cotranslational protein targeting to membrane), GO:0019083 (viral transc…			-0.384493	-0.294738		0.0871998	-0.0537379	0.0132493		0.278062	0.140468	0.213991					286.786	99.6207	13.4539	0.538672	10.9938	29.6059	0.000163764	0.0194798	1.5263e-05	0.0439369	0.23887	0.944911	0.956766	0.000400878	0.00019554		1543.95	1643.18	2141.82	1942.29	2034.7	2445.05	2222.45	2338.76
ENSG00000198618	PPIAP22	p_Pg	peptidylprolyl isomerase A pseudogene 22					-1.00491	-1.03467		0.357833	0.0670289	0.122		0.468024	0.424953	0.599739					286.458	32.5423	3.573	1.74258	3.42512	29.5557	0.000164966	0.0194798	3.29619e-07	0.0439369	0.23887	0.944911	0.947137	0.000400878	0.000354834		3.76687	3.64916	12.8309	10.1235	10.5943	14.008	13.5372	15.5383
ENSG00000102710	SUPT20H	PC	SPT20 homolog, SAGA complex component		hsa04140 (Autophagy - animal), GO:0006914 (autophagy), GO:0007369 (gastrulation), GO:1903506 (regulation of nucleic acid-templated transcription), GO:0000124 (SAGA complex), GO:0001650 (fibrillar center), GO:0070461 (SAGA-type complex), GO:0003712 (transcription cofactor activity), GO:0005515 (protein binding), R-HSA-3214847 (Homo sapiens: HATs acetylate histones), R-HSA-3247509 (Homo sapiens: Ch…			0.410474	0.443834		-0.0149212	0.0297029	0.062288		-0.547972	-0.166089	-0.217316					285.072	68.9749	63.3524	-0.755372	5.4818	29.3441	0.000170146	0.0196814	4.28912e-06	0.0439369	0.23887	-0.944911	-0.953206	0.000400878	0.000247249		58.3865	59.7991	42.9659	44.3784	45.4379	29.0755	38.4927	37.0801
ENSG00000137947	GTF2B	PC	general transcription factor IIB	This gene encodes the general transcription factor IIB, one of the ubiquitous factors required for transcription initiation by RNA polymerase II. The protein localizes to the nucleus where it forms a complex (the DAB complex) with transcription factors IID and IIA. Transcription factor IIB serves as a bridge between IID, the factor which initially recognizes the promoter sequence, and RNA polymer…	hsa03022 (Basal transcription factors), hsa05203 (Viral carcinogenesis), GO:0006355 (regulation of transcription, DNA-templated), GO:0006366 (transcription from RNA polymerase II promoter), GO:0006367 (transcription initiation from RNA polymerase II promoter), GO:0006368 (transcription elongation from RNA polymerase II promoter), GO:0016032 (viral process), GO:0042795 (snRNA transcription from RN…			0.84291	0.692767		-0.293361	-0.265966	-0.0287832		-0.293361	-0.38371	-0.270496					281.61	69.6189	12.0688	-1.08152	5.52116	31.5398	0.00012441	0.0188041	3.01989e-07	0.0796494	0.23887	-0.836516	-0.862267	0.00962802	0.00587593		78.9866	70.982	34.8436	35.5498	42.2596	34.8436	32.607	35.4321
ENSG00000163138	PACRGL	PC	parkin coregulated like		GO:0005515 (protein binding)			0.675066	0.531389		-0.175722	-0.151267	0.15361		-0.446199	-0.373679	-0.2132					281.493	40.4023	18.8972	-1.05511	3.84706	28.7999	0.00018437	0.0205672	2.27172e-06	0.0439369	0.23887	-0.944911	-0.913992	0.000400878	0.00148976		22.8367	20.4824	11.7715	12.0069	15.3029	9.41718	10.0057	11.4183
ENSG00000129084	PSMA1	PC	proteasome subunit alpha 1	The proteasome is a multicatalytic proteinase complex with a highly ordered ring-shaped 20S core structure. The core structure is composed of 4 rings of 28 non-identical subunits; 2 rings are composed of 7 alpha subunits and 2 rings are composed of 7 beta subunits. Proteasomes are distributed throughout eukaryotic cells at a high concentration and cleave peptides in an ATP/ubiquitin-dependent pro…	hsa03050 (Proteasome), GO:0000165 (MAPK cascade), GO:0000209 (protein polyubiquitination), GO:0002223 (stimulatory C-type lectin receptor signaling pathway), GO:0002479 (antigen processing and presentation of exogenous peptide antigen via MHC class I, TAP-dependent), GO:0006521 (regulation of cellular amino acid metabolic process), GO:0010972 (negative regulation of G2/M transition of mitotic cel…			0.595095	0.851142		-0.319122	-0.102689	-0.136362		-0.387654	-0.329571	-0.17084					280.999	89.7406	14.6537	-0.984236	7.20856	30.5552	0.000142862	0.0192347	3.74818e-07	0.0685251	0.23887	-0.869318	-0.847854	0.00504681	0.00783067		213.181	254.97	112.182	130.663	127.603	106.885	111.358	124.542
ENSG00000124614	RPS10	PC	ribosomal protein S10	Ribosomes, the organelles that catalyze protein synthesis, consist of a small 40S subunit and a large 60S subunit. Together these subunits are composed of 4 RNA species and approximately 80 structurally distinct proteins. This gene encodes a ribosomal protein that is a component of the 40S subunit. The protein belongs to the S10E family of ribosomal proteins. It is located in the cytoplasm. Varia…	hsa03010 (Ribosome), GO:0000028 (ribosomal small subunit assembly), GO:0000184 (nuclear-transcribed mRNA catabolic process, nonsense-mediated decay), GO:0006364 (rRNA processing), GO:0006412 (translation), GO:0006413 (translational initiation), GO:0006614 (SRP-dependent cotranslational protein targeting to membrane), GO:0019083 (viral transcription), GO:0005654 (nucleoplasm), GO:0005730 (nucleolu…			-0.452293	-0.429485		0.125739	-0.043435	0.0872957		0.357705	0.121979	0.232494					279.936	96.9919	9.85443	0.658516	8.71416	30.3843	0.000146384	0.0192347	3.66423e-06	0.0685251	0.23887	0.869318	0.923606	0.00504681	0.00105169		300.879	305.705	450.141	400.112	438.252	529.01	448.964	484.867
ENSG00000155096	AZIN1	PC	antizyme inhibitor 1	The protein encoded by this gene belongs to the antizyme inhibitor family, which plays a role in cell growth and proliferation by maintaining polyamine homeostasis within the cell. Antizyme inhibitors are homologs of ornithine decarboxylase (ODC, the key enzyme in polyamine biosynthesis) that have lost the ability to decarboxylase ornithine; however, retain the ability to bind to antizymes. Antiz…	GO:0006521 (regulation of cellular amino acid metabolic process), GO:0033387 (putrescine biosynthetic process from ornithine), GO:0042177 (negative regulation of protein catabolic process), GO:0043085 (positive regulation of catalytic activity), GO:1902269 (positive regulation of polyamine transmembrane transport), GO:0005634 (nucleus), GO:0005737 (cytoplasm), GO:0005829 (cytosol), GO:0003824 (ca…			0.737097	0.92414		-0.337122	-0.232275	-0.0972187		-0.403894	-0.351695	-0.239032					279.92	59.3331	43.0525	-1.1877	4.89636	30.3817	0.000146438	0.0192347	4.046e-07	0.0685251	0.23887	-0.869318	-0.854334	0.00504681	0.00690743		47.3213	54.1488	21.4241	23.1898	25.6618	20.3646	21.1886	23.0721
ENSG00000059145	UNKL	PC	unkempt family like zinc finger	This gene encodes a RING finger protein that may function in Rac signaling. It can bind to Brg/Brm-associated factor 60b and can promote its ubiquitination. Alternative splicing of this gene results in multiple transcript variants. [provided by RefSeq, Jun 2013].	GO:0000209 (protein polyubiquitination), GO:0005634 (nucleus), GO:0005829 (cytosol), GO:0004842 (ubiquitin-protein transferase activity), GO:0005515 (protein binding), GO:0008270 (zinc ion binding), R-HSA-1280218 (Homo sapiens: Adaptive Immune System), R-HSA-168256 (Homo sapiens: Immune System), R-HSA-983168 (Homo sapiens: Antigen processing: Ubiquitination & Proteasome degradation), R-HSA-983169…			-0.535803	-0.708006		0.0126896	-0.129767	0.131019		0.689264	0.332173	0.208429					279.416	36.362	57.5739	1.20895	3.64129	28.4854	0.000193224	0.0207769	2.53661e-06	0.0439369	0.23887	0.944911	0.901012	0.000400878	0.00224837		7.41603	6.35659	11.7715	10.4766	12.9486	20.0115	15.1852	13.7726
ENSG00000136536	MARCH7	PC	membrane associated ring-CH-type finger 7	MARCH7 is a member of the MARCH family of membrane-bound E3 ubiquitin ligases (EC 6.3.2.19). MARCH proteins add ubiquitin (see MIM 191339) to target lysines in substrate proteins, thereby signaling their vesicular transport between membrane compartments (Bartee et al., 2004 [PubMed 14722266]).[supplied by OMIM, Mar 2010].	GO:0002643 (regulation of tolerance induction), GO:0016567 (protein ubiquitination), GO:0042130 (negative regulation of T cell proliferation), GO:0008270 (zinc ion binding), GO:0016740 (transferase activity)			0.753352	0.879095		-0.348741	-0.0641638	-0.199447		-0.491139	-0.269594	-0.259362					279.046	66.8754	70.7896	-1.15885	5.34591	32.3492	0.000111307	0.0176201	1.74525e-07	0.0956344	0.23887	-0.793725	-0.863962	0.0186875	0.00566928		65.2139	71.3351	29.311	36.1384	32.7247	26.3681	31.0767	31.3121
ENSG00000132842	AP3B1	PC	adaptor related protein complex 3 subunit beta 1	This gene encodes a protein that may play a role in organelle biogenesis associated with melanosomes, platelet dense granules, and lysosomes. The encoded protein is part of the heterotetrameric AP-3 protein complex which interacts with the scaffolding protein clathrin. Mutations in this gene are associated with Hermansky-Pudlak syndrome type 2. Two transcript variants encoding different isoforms …	hsa04142 (Lysosome), GO:0006622 (protein targeting to lysosome), GO:0006886 (intracellular protein transport), GO:0007596 (blood coagulation), GO:0008089 (anterograde axon cargo transport), GO:0032438 (melanosome organization), GO:0048007 (antigen processing and presentation, exogenous lipid antigen via MHC class Ib), GO:0048490 (anterograde synaptic vesicle transport), GO:0051138 (positive regul…			0.432621	0.627304		0.0593015	-0.110629	-0.0321242		-0.213901	-0.603688	-0.158885					277.785	65.5434	66.1932	-0.871396	5.2521	28.2394	0.000200498	0.0210448	2.8942e-06	0.0439369	0.23887	-0.944911	-0.909937	0.000400878	0.00170519		50.1465	57.6802	38.2573	33.7841	35.7853	31.3121	23.4252	32.607
ENSG00000131495	NDUFA2	PC	NADH:ubiquinone oxidoreductase subunit A2	The encoded protein is a subunit of the hydrophobic protein fraction of the NADH:ubiquinone oxidoreductase (complex 1), the first enzyme complex in the electron transport chain located in the inner mitochondrial membrane, and may be involved in regulating complex I activity or its assembly via assistance in redox processes. Mutations in this gene are associated with Leigh syndrome, an early-onset…	hsa00190 (Oxidative phosphorylation), hsa01100 (Metabolic pathways), hsa04714 (Thermogenesis), hsa04723 (Retrograde endocannabinoid signaling), hsa04932 (Non-alcoholic fatty liver disease (NAFLD)), hsa05010 (Alzheimer disease), hsa05012 (Parkinson disease), hsa05016 (Huntington disease), GO:0006120 (mitochondrial electron transport, NADH to ubiquinone), GO:0032981 (mitochondrial respiratory chain…			-0.311413	-0.518188		0.0259293	-0.0306877	0.0333681		0.484233	0.226014	0.0907444					275.845	92.8017	8.81341	0.681758	7.66888	27.9475	0.000209549	0.0212188	6.49822e-06	0.0439369	0.23887	0.944911	0.889713	0.000400878	0.00308231		160.21	138.55	202.94	195.053	204	279.572	233.428	212.357
ENSG00000164713	BRI3	PC	brain protein I3		GO:0043312 (neutrophil degranulation), GO:0005886 (plasma membrane), GO:0016021 (integral component of membrane), GO:0035577 (azurophil granule membrane), GO:0042802 (identical protein binding), R-HSA-168249 (Homo sapiens: Innate Immune System), R-HSA-168256 (Homo sapiens: Immune System), R-HSA-6798695 (Homo sapiens: Neutrophil degranulation)			-0.254197	-0.31999		-0.0469172	0.0414767	-0.0162269		0.231962	0.200311	0.16358					275.81	95.0159	24.1112	0.483247	8.11771	27.9422	0.000209717	0.0212188	4.17472e-05	0.0439369	0.23887	0.944911	0.983615	0.000400878	1.0862e-05		230.368	220.009	266.271	283.222	272.039	323.48	316.417	308.413
ENSG00000162600	OMA1	PC	OMA1 zinc metallopeptidase		GO:0002024 (diet induced thermogenesis), GO:0006006 (glucose metabolic process), GO:0006515 (misfolded or incompletely synthesized protein catabolic process), GO:0006629 (lipid metabolic process), GO:0006950 (response to stress), GO:0010637 (negative regulation of mitochondrial fusion), GO:0034982 (mitochondrial protein processing), GO:0042407 (cristae formation), GO:0042981 (regulation of apopto…			0.730486	0.455824		0.174004	0.0561438	-0.213104		-0.454178	-0.250589	-0.498586					275.697	5.36344	15.9153	-1.5642	1.91899	27.9253	0.000210258	0.0212188	1.7991e-06	0.0439369	0.23887	-0.944911	-0.92119	0.000400878	0.00115252		6.82745	5.29716	4.0023	3.53144	2.58972	1.88344	2.47201	1.76572
ENSG00000147400	CETN2	PC	centrin 2	Caltractin belongs to a family of calcium-binding proteins and is a structural component of the centrosome. The high level of conservation from algae to humans and its association with the centrosome suggested that caltractin plays a fundamental role in the structure and function of the microtubule-organizing center, possibly required for the proper duplication and segregation of the centrosome. …	hsa03420 (Nucleotide excision repair), GO:0000086 (G2/M transition of mitotic cell cycle), GO:0000715 (nucleotide-excision repair, DNA damage recognition), GO:0000717 (nucleotide-excision repair, DNA duplex unwinding), GO:0006289 (nucleotide-excision repair), GO:0006294 (nucleotide-excision repair, preincision complex assembly), GO:0007067 (mitotic nuclear division), GO:0007099 (centriole replica…			1.30912	1.2431		-0.530904	-0.26018	-0.389201		-0.642967	-0.321028	-0.407938					275.47	73.2004	36.7799	-1.71792	5.75414	34.1793	8.7205e-05	0.016956	1.96269e-08	0.119433	0.23887	-0.718132	-0.839525	0.0448173	0.00912799		116.42	111.123	31.0767	37.9041	34.4904	28.6047	36.2561	34.0195
ENSG00000103018	CYB5B	PC	cytochrome b5 type B		GO:0006805 (xenobiotic metabolic process), GO:0055114 (oxidation-reduction process), GO:0005741 (mitochondrial outer membrane), GO:0016020 (membrane), GO:0016021 (integral component of membrane), GO:0005515 (protein binding), GO:0020037 (heme binding), GO:0046872 (metal ion binding), R-HSA-1430728 (Homo sapiens: Metabolism), R-HSA-211859 (Homo sapiens: Biological oxidations), R-HSA-211945 (Homo s…			-0.359201	-0.225625		-0.0245083	-0.16492	-0.198459		0.462106	0.32149	0.189117					275.05	91.1521	76.7005	0.649468	7.39125	27.8282	0.000213386	0.0212188	7.92113e-06	0.0439369	0.23887	0.944911	0.892173	0.000400878	0.0028862		127.838	140.434	161.74	146.555	143.141	227.425	206.118	187.873
ENSG00000095261	PSMD5	PC	proteasome 26S subunit, non-ATPase 5	The 26S proteasome is a multicatalytic proteinase complex with a highly ordered structure composed of 2 complexes, a 20S core and a 19S regulator. The 20S core is composed of 4 rings of 28 non-identical subunits; 2 rings are composed of 7 alpha subunits and 2 rings are composed of 7 beta subunits. The 19S regulator is composed of a base, which contains 6 ATPase subunits and 2 non-ATPase subunits,…	GO:0000165 (MAPK cascade), GO:0000209 (protein polyubiquitination), GO:0002223 (stimulatory C-type lectin receptor signaling pathway), GO:0002479 (antigen processing and presentation of exogenous peptide antigen via MHC class I, TAP-dependent), GO:0006521 (regulation of cellular amino acid metabolic process), GO:0010972 (negative regulation of G2/M transition of mitotic cell cycle), GO:0016579 (p…			1.30282	1.19136		-0.309265	-0.464925	-0.376383		-0.59879	-0.40238	-0.342434					274.974	57.6835	21.9056	-1.74854	4.80439	34.0882	8.82501e-05	0.016956	2.67247e-08	0.119433	0.23887	-0.718132	-0.83976	0.0448173	0.00908957		61.3294	56.6208	18.7166	16.5978	17.7749	14.9498	17.4218	18.2458
ENSG00000151881	TMEM267	PC	transmembrane protein 267		GO:0016021 (integral component of membrane)			0.766214	0.636918		-0.193271	-0.0412417	-0.0901594		-0.363229	-0.193271	-0.52196					274.969	16.5932	56.3211	-1.39549	2.54999	28.5435	0.000191551	0.0207769	8.64804e-07	0.0537348	0.23887	-0.912563	-0.90528	0.00156352	0.00197644		10.3589	9.29946	4.35544	5.06173	4.8263	3.64916	4.35544	3.06058
ENSG00000163029	SMC6	PC	structural maintenance of chromosomes 6		GO:0000722 (telomere maintenance via recombination), GO:0000724 (double-strand break repair via homologous recombination), GO:0006974 (cellular response to DNA damage stimulus), GO:0051984 (positive regulation of chromosome segregation), GO:0090398 (cellular senescence), GO:0000781 (chromosome, telomeric region), GO:0000803 (sex chromosome), GO:0005622 (intracellular), GO:0005634 (nucleus), GO:00…			0.886564	0.779918		-0.243204	-0.220119	-0.0612544		-0.282519	-0.175029	-0.684358					272.901	55.7516	82.7966	-1.24479	4.698	31.2996	0.00012864	0.0189384	2.48598e-07	0.0956344	0.23887	-0.793725	-0.873489	0.0186875	0.00459384		45.9087	42.495	19.8938	20.2469	22.8367	19.3052	20.9532	14.1258
ENSG00000163257	DCAF16	PC	DDB1 and CUL4 associated factor 16		GO:0016567 (protein ubiquitination), GO:0080008 (Cul4-RING E3 ubiquitin ligase complex), GO:0005515 (protein binding)			-0.412984	-0.412984		0.016618	-0.218707	-0.0678352		0.590293	0.377589	0.12801					272.517	62.7117	71.8041	0.852254	5.08767	27.3276	0.000230414	0.0219869	6.86601e-06	0.0423134	0.23887	0.950586	0.881648	0.000290566	0.00378524		24.1315	24.1315	33.1955	27.8984	31.1944	50.3819	43.2013	36.0207
ENSG00000168906	MAT2A	PC	methionine adenosyltransferase 2A	The protein encoded by this gene catalyzes the production of S-adenosylmethionine (AdoMet) from methionine and ATP. AdoMet is the key methyl donor in cellular processes. [provided by RefSeq, Jun 2011]. Sequence Note: This RefSeq record was created from transcript and genomic sequence data to make the sequence consistent with the reference genome assembly. The genomic coordinates used for the tran…	hsa00270 (Cysteine and methionine metabolism), hsa01100 (Metabolic pathways), hsa01230 (Biosynthesis of amino acids), GO:0006556 (S-adenosylmethionine biosynthetic process), GO:0006730 (one-carbon metabolic process), GO:0032259 (methylation), GO:0034214 (protein hexamerization), GO:0051291 (protein heterooligomerization), GO:0005829 (cytosol), GO:0048269 (methionine adenosyltransferase complex), …			0.642657	0.731323		-0.160801	-0.23403	-0.190505		-0.318184	-0.218646	-0.251814					272.343	83.4598	44.5964	-0.918725	6.53175	29.1711	0.000174524	0.0199839	9.5898e-07	0.0685251	0.23887	-0.869318	-0.856357	0.00504681	0.00663427		139.139	148.085	78.8688	74.8665	77.2208	70.5111	75.6905	73.9248
ENSG00000138180	CEP55	PC	centrosomal protein 55		GO:0000281 (mitotic cytokinesis), GO:0000920 (cytokinetic cell separation), GO:0045184 (establishment of protein localization), GO:0005813 (centrosome), GO:0005814 (centriole), GO:0005815 (microtubule organizing center), GO:0005886 (plasma membrane), GO:0016020 (membrane), GO:0030496 (midbody), GO:0032154 (cleavage furrow), GO:0045171 (intercellular bridge), GO:0005515 (protein binding)			0.518047	1.15067		-0.226131	-0.0968447	-0.262658		-0.418783	-0.429125	-0.235177					270.9	69.5483	46.255	-1.22894	5.51374	28.9424	0.000180515	0.0204632	5.08735e-07	0.0685251	0.23887	-0.869318	-0.799075	0.00504681	0.0173458		61.0939	95.8198	35.6676	39.199	34.7258	30.959	30.7235	35.4321
ENSG00000264859	DSG2-AS1	As	DSG2 antisense RNA 1					0.587416	1.2676		-0.380316	-0.0141178	-0.117229		-0.702322	-0.412744	-0.228281					267.495	16.4344	49.2016	-1.881	2.54272	28.4048	0.000195571	0.0207769	5.24738e-07	0.0685251	0.23887	-0.869318	-0.808925	0.00504681	0.0150364		8.35774	14.5966	3.29601	4.8263	4.35544	2.23658	3.1783	3.88458
ENSG00000100479	POLE2	PC	DNA polymerase epsilon 2, accessory subunit		hsa01100 (Metabolic pathways), hsa03030 (DNA replication), hsa03410 (Base excision repair), hsa03420 (Nucleotide excision repair), GO:0000082 (G1/S transition of mitotic cell cycle), GO:0000722 (telomere maintenance via recombination), GO:0006260 (DNA replication), GO:0006261 (DNA-dependent DNA replication), GO:0006270 (DNA replication initiation), GO:0006281 (DNA repair), GO:0042276 (error-prone…			1.08644	0.938334		-0.527092	-0.253295	0.00679667		-0.443422	-0.443422	-0.36434					267.134	32.6747	18.7031	-1.6543	3.42907	32.5136	0.000108848	0.0176201	9.42728e-08	0.116414	0.23887	-0.722446	-0.859775	0.0429448	0.0061885		22.1304	19.7761	5.88573	7.53374	9.41718	6.35659	6.35659	6.82745
ENSG00000147100	SLC16A2	PC	solute carrier family 16 member 2	This gene encodes an integral membrane protein that functions as a transporter of thyroid hormone. The encoded protein facilitates the cellular importation of thyroxine (T4), triiodothyronine (T3), reverse triiodothyronine (rT3) and diidothyronine (T2). This gene is expressed in many tissues and likely plays an important role in the development of the central nervous system. Loss of function muta…	hsa04919 (Thyroid hormone signaling pathway), GO:0006810 (transport), GO:0015718 (monocarboxylic acid transport), GO:0043252 (sodium-independent organic anion transport), GO:0055085 (transmembrane transport), GO:0070327 (thyroid hormone transport), GO:0005886 (plasma membrane), GO:0005887 (integral component of plasma membrane), GO:0005215 (transporter activity), GO:0008028 (monocarboxylic acid t…			0.479271	0.289552		-0.0652447	-0.0323797	-0.0470764		-0.19562	-0.274129	-0.154372					266.339	85.5593	92.7217	-0.585951	6.73733	26.5316	0.000260885	0.023011	2.30705e-05	0.0439369	0.23887	-0.944911	-0.91197	0.000400878	0.00159479		147.026	128.662	100.175	102.53	101.47	91.3466	86.4026	94.054
ENSG00000270069	MIR222HG	lincRNA	MIR222 host gene					0.65023	0.924316		-0.203959	-0.0970375	-0.299543		-0.360089	-0.222576	-0.391342					266.049	49.9206	57.3004	-1.1739	4.36869	28.1777	0.000202373	0.0210468	1.29718e-06	0.0685251	0.23887	-0.869318	-0.850968	0.00504681	0.0073778		31.1944	38.1396	16.3623	17.7749	15.1852	14.4789	16.1269	14.1258
ENSG00000124641	MED20	PC	mediator complex subunit 20	MED20 is a subunit of the Mediator complex, a multiprotein coactivator of RNA transcription that interacts with DNA-bound transcriptional activators, RNA polymerase II (see MIM 180660), and general initiation factors (Sato et al., 2003 [PubMed 14576168]).[supplied by OMIM, Aug 2009].	GO:0006351 (transcription, DNA-templated), GO:0006357 (regulation of transcription from RNA polymerase II promoter), GO:0006366 (transcription from RNA polymerase II promoter), GO:0006367 (transcription initiation from RNA polymerase II promoter), GO:0016567 (protein ubiquitination), GO:0000151 (ubiquitin ligase complex), GO:0005654 (nucleoplasm), GO:0016592 (mediator complex), GO:0001104 (RNA po…			0.658602	0.221037		0.0160486	0.0647764	0.00499296		-0.439966	-0.289467	-0.236025					265.959	59.1037	42.4438	-0.822879	4.88419	26.4754	0.000263207	0.023011	1.12181e-05	0.0439369	0.23887	-0.944911	-0.889328	0.000400878	0.00311378		46.1442	33.5487	28.8401	29.8995	28.6047	20.4824	22.9544	23.8961
ENSG00000115204	MPV17	PC	MPV17, mitochondrial inner membrane protein	This gene encodes a mitochondrial inner membrane protein that is implicated in the metabolism of reactive oxygen species. Mutations in this gene have been associated with the hepatocerebral form of mitochondrial DNA depletion syndrome (MDDS). [provided by RefSeq, Jul 2008]. Publication Note: This RefSeq record includes a subset of the publications that are available for this gene. Please see the …	hsa04146 (Peroxisome), GO:0000002 (mitochondrial genome maintenance), GO:0032836 (glomerular basement membrane development), GO:0034614 (cellular response to reactive oxygen species), GO:0042592 (homeostatic process), GO:0048839 (inner ear development), GO:2000377 (regulation of reactive oxygen species metabolic process), GO:0005739 (mitochondrion), GO:0005743 (mitochondrial inner membrane), GO:0…			0.304818	0.40236		-0.0373454	0.106821	0.0161377		-0.417286	-0.26528	-0.110226					265.848	79.2255	15.4036	-0.62733	6.1892	26.4591	0.000263888	0.023011	2.11278e-05	0.0439369	0.23887	-0.944911	-0.946012	0.000400878	0.000377632		88.8746	95.2312	69.6871	77.2208	72.3945	53.0893	59.2105	66.1557
ENSG00000166848	TERF2IP	PC	TERF2 interacting protein	The gene encodes a protein that is part of a complex involved in telomere length regulation. Pseudogenes are present on chromosomes 5 and 22. [provided by RefSeq, Apr 2010]. Publication Note: This RefSeq record includes a subset of the publications that are available for this gene. Please see the Gene record to access additional publications.	GO:0000723 (telomere maintenance), GO:0001933 (negative regulation of protein phosphorylation), GO:0006351 (transcription, DNA-templated), GO:0006355 (regulation of transcription, DNA-templated), GO:0007004 (telomere maintenance via telomerase), GO:0010569 (regulation of double-strand break repair via homologous recombination), GO:0010833 (telomere maintenance via telomere lengthening), GO:001623…			1.26274	0.98179		-0.501316	-0.263389	-0.288318		-0.375782	-0.409571	-0.406157					264.311	79.1461	44.7816	-1.49418	6.18103	32.1482	0.000114403	0.0177654	5.77695e-08	0.119433	0.23887	-0.718132	-0.82871	0.0448173	0.0110055		156.325	128.309	44.6139	52.9716	52.0299	48.8516	47.6745	47.7922
ENSG00000089327	FXYD5	PC	FXYD domain containing ion transport regulator 5	This gene encodes a member of a family of small membrane proteins that share a 35-amino acid signature sequence domain, beginning with the sequence PFXYD and containing 7 invariant and 6 highly conserved amino acids. The approved human gene nomenclature for the family is FXYD-domain containing ion transport regulator. Mouse FXYD5 has been termed RIC (Related to Ion Channel). FXYD2, also known as …	GO:0030033 (microvillus assembly), GO:0034220 (ion transmembrane transport), GO:0046588 (negative regulation of calcium-dependent cell-cell adhesion), GO:2000649 (regulation of sodium ion transmembrane transporter activity), GO:0005887 (integral component of plasma membrane), GO:0016021 (integral component of membrane), GO:0003779 (actin binding), GO:0005216 (ion channel activity), GO:0017080 (so…			0.232364	0.315066		-0.0418471	0.100221	0.00530657		-0.291741	-0.180006	-0.139364					263.99	98.2269	15.5624	-0.47592	9.39191	26.1852	0.000275605	0.0236686	5.33184e-05	0.0439369	0.23887	-0.944911	-0.955645	0.000400878	0.000210961		782.096	828.358	646.371	713.469	667.913	543.253	587.161	603.994
ENSG00000183864	TOB2	PC	transducer of ERBB2, 2	TOB2 belongs to the TOB (see TOB1; MIM 605523)/BTG1 (MIM 109580) family of antiproliferative proteins, which are involved in the regulation of cell cycle progression.[supplied by OMIM, Apr 2004]. Publication Note: This RefSeq record includes a subset of the publications that are available for this gene. Please see the Gene record to access additional publications.	hsa03018 (RNA degradation), GO:0007292 (female gamete generation), GO:0008285 (negative regulation of cell proliferation), GO:0010468 (regulation of gene expression), GO:0023052 (signaling), GO:0045671 (negative regulation of osteoclast differentiation), GO:0045778 (positive regulation of ossification), GO:1903507 (negative regulation of nucleic acid-templated transcription), GO:0005634 (nucleus)…			-0.412651	-0.468798		-0.0197832	-0.286193	0.037771		0.559604	0.190588	0.399463					263.476	48.368	86.5726	0.93497	4.27641	26.1096	0.000278944	0.0237752	1.0392e-05	0.0439369	0.23887	0.944911	0.906028	0.000400878	0.00193111		13.4195	12.8309	18.2458	14.8321	19.0698	28.2515	21.4241	25.0732
ENSG00000005175	RPAP3	PC	RNA polymerase II associated protein 3	This gene encodes an RNA polymerase II-associated protein. The encoded protein may function in transcriptional regulation and may also regulate apoptosis. Alternatively spliced transcript variants have been described. [provided by RefSeq, Mar 2009].	GO:0097255 (R2TP complex), GO:0005515 (protein binding)			0.696922	0.826693		-0.214247	-0.164059	-0.182676		-0.164059	-0.333992	-0.464582					262.804	60.2417	56.0476	-1.0998	4.94472	30.5527	0.000142913	0.0192347	5.14921e-07	0.105505	0.23887	-0.760469	-0.867036	0.0284811	0.00530632		48.0276	52.7362	24.6024	25.5441	25.1909	25.5441	22.4835	20.3646
ENSG00000164941	INTS8	PC	integrator complex subunit 8	This gene encodes a subunit of the Integrator complex which is involved in the cleavage of small nuclear RNAs U1 and U2 within the nucleus. The encoded protein associates with RNA polymerase II and is recruited to the U1 and U2 small nuclear RNA genes. Alternative splicing results in multiple transcript variants. [provided by RefSeq, Nov 2012].	GO:0016180 (snRNA processing), GO:0042795 (snRNA transcription from RNA polymerase II promoter), GO:0005654 (nucleoplasm), GO:0032039 (integrator complex), GO:0005515 (protein binding), R-HSA-6807505 (Homo sapiens: RNA polymerase II transcribes snRNA genes), R-HSA-74160 (Homo sapiens: Gene Expression)			0.605791	0.89599		-0.0441931	-0.192304	-0.272482		-0.357379	-0.416886	-0.218538					261.919	39.6171	48.0371	-1.19726	3.80667	27.5317	0.000223286	0.0217062	1.91769e-06	0.0685251	0.23887	-0.869318	-0.859632	0.00504681	0.00620673		20.7178	25.7795	12.4778	11.0652	10.3589	9.65261	9.18175	10.8298
ENSG00000116209	TMEM59	PC	transmembrane protein 59		GO:0006508 (proteolysis), GO:0006914 (autophagy), GO:0010508 (positive regulation of autophagy), GO:0010955 (negative regulation of protein processing), GO:0090005 (negative regulation of establishment of protein localization to plasma membrane), GO:0090285 (negative regulation of protein glycosylation in Golgi), GO:0000137 (Golgi cis cisterna), GO:0000138 (Golgi trans cisterna), GO:0000139 (Golg…			0.846082	0.594169		-0.238259	-0.207609	-0.156534		-0.391001	-0.231636	-0.215211					261.852	92.2459	64.5346	-0.958825	7.55621	29.4405	0.000167763	0.0196058	5.80722e-07	0.0956344	0.23887	-0.793725	-0.841046	0.0186875	0.00888155		323.48	271.332	151.499	154.795	160.445	136.078	152.205	153.971
ENSG00000276259	AC009118.3	As						0.679608	0.474181		-0.0866102	-0.213178	-0.0418708		-0.379495	-0.311536	-0.1211					261.78	70.4746	16.3741	-0.847115	5.56711	27.51	0.000224032	0.0217062	3.76721e-06	0.0685251	0.23887	-0.869318	-0.875662	0.00504681	0.00436863		74.278	64.1545	42.8481	39.0813	44.2607	34.6081	36.3738	41.7887
ENSG00000269987	AC004542.2	lincRNA						0.531441	1.12102		-0.160519	0.00696107	-0.300266		-0.510521	-0.205614	-0.482502					260.536	22.6094	4.60521	-1.55693	2.89636	27.3165	0.000230808	0.0219869	1.38683e-06	0.0685251	0.23887	-0.869318	-0.822459	0.00504681	0.0121938		10.3589	16.5978	5.65031	6.59202	4.94402	4.0023	5.41488	4.12001
ENSG00000143753	DEGS1	PC	delta 4-desaturase, sphingolipid 1	This gene encodes a member of the membrane fatty acid desaturase family which is responsible for inserting double bonds into specific positions in fatty acids. This protein contains three His-containing consensus motifs that are characteristic of a group of membrane fatty acid desaturases. It is predicted to be a multiple membrane-spanning protein localized to the endoplasmic reticulum. Overexpre…	hsa00600 (Sphingolipid metabolism), hsa01100 (Metabolic pathways), hsa04071 (Sphingolipid signaling pathway), GO:0006636 (unsaturated fatty acid biosynthetic process), GO:0030148 (sphingolipid biosynthetic process), GO:0043312 (neutrophil degranulation), GO:0046513 (ceramide biosynthetic process), GO:0055114 (oxidation-reduction process), GO:0005739 (mitochondrion), GO:0005783 (endoplasmic reticu…			-0.602704	-0.293199		0.0303104	0.0573556	0.00915579		0.398939	0.296145	0.103997					259.067	80.7957	28.4693	0.709586	6.30461	25.4639	0.0003095	0.0259888	1.61024e-05	0.0439369	0.23887	0.944911	0.91868	0.000400878	0.00126375		50.1465	62.6242	78.8688	80.3991	77.6917	102.412	95.2312	83.1066
ENSG00000058668	ATP2B4	PC	ATPase plasma membrane Ca2+ transporting 4	The protein encoded by this gene belongs to the family of P-type primary ion transport ATPases characterized by the formation of an aspartyl phosphate intermediate during the reaction cycle. These enzymes remove bivalent calcium ions from eukaryotic cells against very large concentration gradients and play a critical role in intracellular calcium homeostasis. The mammalian plasma membrane calcium…	hsa04020 (Calcium signaling pathway), hsa04022 (cGMP-PKG signaling pathway), hsa04024 (cAMP signaling pathway), hsa04261 (Adrenergic signaling in cardiomyocytes), hsa04925 (Aldosterone synthesis and secretion), hsa04970 (Salivary secretion), hsa04972 (Pancreatic secretion), GO:0003407 (neural retina development), GO:0006357 (regulation of transcription from RNA polymerase II promoter), GO:0006874…			0.460319	0.328686		-0.0304008	0.011746	-0.121612		-0.268566	-0.202826	-0.177347					257.264	75.3793	96.2153	-0.612629	5.90666	25.2015	0.00032303	0.0261094	3.73113e-05	0.0439369	0.23887	-0.944911	-0.924737	0.000400878	0.00100655		81.694	74.3957	57.5625	59.3282	53.9133	48.4985	50.8527	51.7945
ENSG00000070961	ATP2B1	PC	ATPase plasma membrane Ca2+ transporting 1	The protein encoded by this gene belongs to the family of P-type primary ion transport ATPases characterized by the formation of an aspartyl phosphate intermediate during the reaction cycle. These enzymes remove bivalent calcium ions from eukaryotic cells against very large concentration gradients and play a critical role in intracellular calcium homeostasis. The mammalian plasma membrane calcium…	hsa04020 (Calcium signaling pathway), hsa04022 (cGMP-PKG signaling pathway), hsa04024 (cAMP signaling pathway), hsa04261 (Adrenergic signaling in cardiomyocytes), hsa04925 (Aldosterone synthesis and secretion), hsa04961 (Endocrine and other factor-regulated calcium reabsorption), hsa04970 (Salivary secretion), hsa04972 (Pancreatic secretion), hsa04978 (Mineral absorption), GO:0003407 (neural reti…			0.330792	0.441325		0.0643686	-0.0409874	-0.045366		-0.352037	-0.257569	-0.140526					257.146	65.9051	87.5607	-0.656103	5.27969	25.1843	0.000323938	0.0261094	3.54054e-05	0.0439369	0.23887	-0.944911	-0.948081	0.000400878	0.000336392		48.263	52.2653	39.7876	36.8447	36.727	29.311	31.4298	34.255
ENSG00000103342	GSPT1	PC	G1 to S phase transition 1		hsa03015 (mRNA surveillance pathway), GO:0000082 (G1/S transition of mitotic cell cycle), GO:0000184 (nuclear-transcribed mRNA catabolic process, nonsense-mediated decay), GO:0002184 (cytoplasmic translational termination), GO:0006415 (translational termination), GO:0006479 (protein methylation), GO:0005622 (intracellular), GO:0005829 (cytosol), GO:0018444 (translation release factor complex), GO…			1.27942	0.74605		-0.230076	-0.20725	-0.339701		-0.70311	-0.162653	-0.382682					256.635	90.7816	66.5902	-1.38667	7.33766	30.7747	0.000138485	0.0192347	1.01676e-07	0.119433	0.23887	-0.718132	-0.811298	0.0448173	0.0145107		355.263	244.847	123.483	125.484	114.301	88.4037	129.486	110.887
ENSG00000204231	RXRB	PC	retinoid X receptor beta	This gene encodes a member of the retinoid X receptor (RXR) family of nuclear receptors which are involved in mediating the effects of retinoic acid (RA). The encoded protein forms homodimers with the retinoic acid, thyroid hormone, and vitamin D receptors, increasing both DNA binding and transcriptional function on their respective response elements. This gene lies within the major histocompatib…	hsa03320 (PPAR signaling pathway), hsa04659 (Th17 cell differentiation), hsa04919 (Thyroid hormone signaling pathway), hsa04920 (Adipocytokine signaling pathway), hsa04928 (Parathyroid hormone synthesis, secretion and action), hsa05200 (Pathways in cancer), hsa05202 (Transcriptional misregulation in cancer), hsa05216 (Thyroid cancer), hsa05222 (Small cell lung cancer), hsa05223 (Non-small cell lu…			-0.587815	-0.463819		0.0983602	0.0868181	0.0276806		0.192909	0.266374	0.379492					256.277	56.3162	71.3366	0.832978	4.72715	25.058	0.000330718	0.0261094	2.00339e-05	0.0439369	0.23887	0.944911	0.951289	0.000400878	0.000278503		16.3623	18.0103	27.5452	27.3098	26.1327	29.5464	31.1944	33.9018
ENSG00000108406	DHX40	PC	DEAH-box helicase 40	This gene encodes a member of the DExH/D box family of ATP-dependent RNA helicases that have an essential role in RNA metabolism. Alternate splicing results in multiple transcript variants. A pseudogene of this gene is found on chromosome 17.[provided by RefSeq, Oct 2009].	GO:0000398 (mRNA splicing, via spliceosome), GO:0005681 (spliceosomal complex), GO:0005737 (cytoplasm), GO:0003676 (nucleic acid binding), GO:0004004 (ATP-dependent RNA helicase activity), GO:0005524 (ATP binding)			0.784807	0.4157		-0.111565	-0.0875186	-0.192605		-0.27847	-0.292145	-0.238204					256.157	59.1478	44.7375	-0.901794	4.88706	25.0406	0.000331665	0.0261094	9.53799e-06	0.0439369	0.23887	-0.944911	-0.846733	0.000400878	0.00799801		50.1465	38.375	26.0149	26.4858	24.4847	22.9544	22.7189	23.6607
ENSG00000223374	AC005104.1	As						-1.03207	-0.358829		0.190399	-0.0126359	-0.0190625		0.557308	0.282119	0.392767					255.539	56.0868	2.62903	1.12571	4.71427	24.951	0.000336593	0.0261344	4.05964e-06	0.0439369	0.23887	0.944911	0.925899	0.000400878	0.000961503		11.0652	18.8344	28.487	24.4847	24.3669	37.3156	30.4881	33.0778
ENSG00000234176	HSPA8P1	p_Pg	heat shock protein family A (Hsp70) member 8 pseudogene 1					1.25304	0.656367		-0.415878	-0.225524	0.0801322		-0.70132	-0.19346	-0.453357					255.488	34.8624	67.8783	-1.62646	3.55722	28.3864	0.000196112	0.0207769	5.51379e-07	0.0956344	0.23887	-0.793725	-0.818027	0.0186875	0.0130835		27.1921	17.3041	7.1806	8.47546	10.9475	5.53259	8.71089	6.94517
ENSG00000197170	PSMD12	PC	proteasome 26S subunit, non-ATPase 12	The 26S proteasome is a multicatalytic proteinase complex with a highly ordered structure composed of 2 complexes, a 20S core and a 19S regulator. The 20S core is composed of 4 rings of 28 non-identical subunits; 2 rings are composed of 7 alpha subunits and 2 rings are composed of 7 beta subunits. The 19S regulator is composed of a base, which contains 6 ATPase subunits and 2 non-ATPase subunits,…	hsa03050 (Proteasome), hsa05169 (Epstein-Barr virus infection), GO:0000165 (MAPK cascade), GO:0000209 (protein polyubiquitination), GO:0002223 (stimulatory C-type lectin receptor signaling pathway), GO:0002479 (antigen processing and presentation of exogenous peptide antigen via MHC class I, TAP-dependent), GO:0006521 (regulation of cellular amino acid metabolic process), GO:0010972 (negative reg…			0.888721	1.00893		-0.19738	-0.244842	-0.296417		-0.632801	-0.477326	-0.0488809					254.1	82.8776	51.5307	-1.28194	6.47894	30.3254	0.00014762	0.0192347	1.80917e-07	0.119433	0.23887	-0.718132	-0.847705	0.0448173	0.00785286		152.441	165.86	70.7465	68.3922	65.9202	51.7945	57.9156	78.6334
ENSG00000116171	SCP2	PC	sterol carrier protein 2	This gene encodes two proteins: sterol carrier protein X (SCPx) and sterol carrier protein 2 (SCP2), as a result of transcription initiation from 2 independently regulated promoters. The transcript initiated from the proximal promoter encodes the longer SCPx protein, and the transcript initiated from the distal promoter encodes the shorter SCP2 protein, with the 2 proteins sharing a common C-term…	hsa00120 (Primary bile acid biosynthesis), hsa01040 (Biosynthesis of unsaturated fatty acids), hsa01100 (Metabolic pathways), hsa01212 (Fatty acid metabolism), hsa03320 (PPAR signaling pathway), hsa04146 (Peroxisome), GO:0006694 (steroid biosynthetic process), GO:0006699 (bile acid biosynthetic process), GO:0007031 (peroxisome organization), GO:0015914 (phospholipid transport), GO:0015918 (sterol…			0.504949	0.467385		-0.183051	-0.0665982	-0.0417661		-0.355923	-0.236525	-0.0884707					253.798	85.6387	61.985	-0.690855	6.74329	26.2754	0.000271681	0.0235097	9.44998e-06	0.0685251	0.23887	-0.869318	-0.887429	0.00504681	0.00327197		149.145	145.26	91.8175	99.7043	101.47	81.2231	88.4037	98.1741
ENSG00000168028	RPSA	PC	ribosomal protein SA	Laminins, a family of extracellular matrix glycoproteins, are the major noncollagenous constituent of basement membranes. They have been implicated in a wide variety of biological processes including cell adhesion, differentiation, migration, signaling, neurite outgrowth and metastasis. Many of the effects of laminin are mediated through interactions with cell surface receptors. These receptors i…	hsa03010 (Ribosome), GO:0000028 (ribosomal small subunit assembly), GO:0000184 (nuclear-transcribed mRNA catabolic process, nonsense-mediated decay), GO:0000447 (endonucleolytic cleavage in ITS1 to separate SSU-rRNA from 5.8S rRNA and LSU-rRNA from tricistronic rRNA transcript (SSU-rRNA, 5.8S rRNA, LSU-rRNA)), GO:0000461 (endonucleolytic cleavage to generate mature 3'-end of SSU-rRNA from (SSU-rR…			-0.565122	-0.613366		0.158908	0.120877	0.181421		0.3136	0.213731	0.18995					253.493	99.2325	22.4967	0.773321	10.3352	24.6551	0.000353492	0.0267146	1.03673e-05	0.0439369	0.23887	0.944911	0.892721	0.000400878	0.00284363		849.9	821.884	1405.16	1368.55	1427.29	1564.43	1459.66	1435.77
ENSG00000139354	GAS2L3	PC	growth arrest specific 2 like 3		GO:0000226 (microtubule cytoskeleton organization), GO:0030036 (actin cytoskeleton organization), GO:0005737 (cytoplasm), GO:0005874 (microtubule), GO:0015629 (actin cytoskeleton), GO:0015630 (microtubule cytoskeleton), GO:0003779 (actin binding), GO:0005515 (protein binding), GO:0008017 (microtubule binding)			-0.376092	-0.488581		0.0299431	-0.288619	-0.0832784		0.491884	0.481967	0.232777					252.132	32.904	63.2378	1.02759	3.43693	24.4587	0.000365254	0.0274207	1.48465e-05	0.0439369	0.23887	0.944911	0.922089	0.000400878	0.00111432		7.41603	6.70974	10.4766	8.0046	9.53489	15.1852	15.0675	12.36
ENSG00000109606	DHX15	PC	DEAH-box helicase 15	The protein encoded by this gene is a putative ATP-dependent RNA helicase implicated in pre-mRNA splicing. [provided by RefSeq, Jul 2008].	hsa03040 (Spliceosome), GO:0000398 (mRNA splicing, via spliceosome), GO:0006397 (mRNA processing), GO:0008380 (RNA splicing), GO:0009636 (response to toxic substance), GO:0043279 (response to alkaloid), GO:0005634 (nucleus), GO:0005654 (nucleoplasm), GO:0005689 (U12-type spliceosomal complex), GO:0005730 (nucleolus), GO:0005737 (cytoplasm), GO:0016607 (nuclear speck), GO:0071008 (U2-type post-mRN…			0.965079	0.919525		-0.330809	-0.328912	-0.164261		-0.519124	-0.302612	-0.238886					251.795	87.2442	44.8081	-1.2457	6.91125	32.4882	0.000109223	0.0176201	7.51028e-08	0.133469	0.23887	-0.64254	-0.848009	0.085764	0.0078078		217.654	210.827	87.462	87.5797	98.4095	76.5146	89.2277	93.3478
ENSG00000122042	UBL3	PC	ubiquitin like 3		GO:0005622 (intracellular), GO:0005886 (plasma membrane), GO:0070062 (extracellular vesicular exosome)			0.60458	0.6901		-0.15585	-0.187284	-0.0308321		-0.341414	-0.0890155	-0.490285					251.494	59.4478	97.0181	-0.970316	4.90276	27.7312	0.000216567	0.0213479	2.45806e-06	0.0956344	0.23887	-0.793725	-0.883316	0.0186875	0.00363224		44.2607	47.0859	25.3087	24.7201	27.7807	22.0126	26.6035	19.6584
ENSG00000253167	WASHC5-AS1	As	WASHC5 antisense RNA 1					0.53444	0.389557		0.0211408	0.110154	-0.0187555		-0.236682	-0.268394	-0.53146					251.271	33.945	6.05205	-0.945398	3.50208	24.3348	0.000372914	0.0274493	1.7436e-05	0.0439369	0.23887	-0.944911	-0.959989	0.000400878	0.000155368		16.4801	14.7143	10.9475	11.7715	10.5943	8.8286	8.59317	6.82745
ENSG00000165996	HACD1	PC	3-hydroxyacyl-CoA dehydratase 1		hsa00062 (Fatty acid elongation), hsa01040 (Biosynthesis of unsaturated fatty acids), hsa01100 (Metabolic pathways), hsa01212 (Fatty acid metabolism), GO:0006633 (fatty acid biosynthetic process), GO:0007275 (multicellular organismal development), GO:0035338 (long-chain fatty-acyl-CoA biosynthetic process), GO:0005789 (endoplasmic reticulum membrane), GO:0016021 (integral component of membrane), …			0.426786	0.456102		-0.0384904	-0.0326611	0.00749756		-0.0739698	-0.409446	-0.335819					250.554	58.4157	25.3639	-0.74103	4.8441	24.2318	0.000379423	0.0274493	2.78815e-05	0.0439369	0.23887	-0.944911	-0.935888	0.000400878	0.000627535		38.1396	38.9636	27.0744	27.1921	28.0161	26.3681	20.4824	21.6595
ENSG00000102007	PLP2	PC	proteolipid protein 2	This gene encodes an integral membrane protein that localizes to the endoplasmic reticulum in colonic epithelial cells. The encoded protein can multimerize and may function as an ion channel. A polymorphism in the promoter of this gene may be linked to an increased risk of X-linked mental retardation. A pseudogene of this gene is found on chromosome 5. [provided by RefSeq, Jan 2010]. Sequence Not…	GO:0006811 (ion transport), GO:0006935 (chemotaxis), GO:0019221 (cytokine-mediated signaling pathway), GO:0034220 (ion transmembrane transport), GO:0005783 (endoplasmic reticulum), GO:0005789 (endoplasmic reticulum membrane), GO:0005886 (plasma membrane), GO:0016020 (membrane), GO:0016021 (integral component of membrane), GO:0070062 (extracellular vesicular exosome), GO:0005515 (protein binding),…			0.2798	0.319115		-0.0195573	0.0275293	-0.089164		-0.223942	-0.184321	-0.10946					250.535	97.8917	15.0948	-0.459581	9.19482	24.2291	0.000379595	0.0274493	9.53664e-05	0.0439369	0.23887	-0.944911	-0.94079	0.000400878	0.000496175		705.346	724.887	572.8	591.869	545.725	496.874	510.764	538.074
ENSG00000198888	MT-ND1	PC	mitochondrially encoded NADH:ubiquinone oxidoreductase core subunit 1		hsa00190 (Oxidative phosphorylation), hsa01100 (Metabolic pathways), hsa04714 (Thermogenesis), hsa04723 (Retrograde endocannabinoid signaling), hsa05012 (Parkinson disease), R-HSA-1428517 (Homo sapiens: The citric acid (TCA) cycle and respiratory electron transport), R-HSA-1430728 (Homo sapiens: Metabolism), R-HSA-163200 (Homo sapiens: Respiratory electron transport, ATP synthesis by chemiosmotic…			0.897283	0.803596		-0.254545	0.0109788	-0.355711		-0.673522	-0.336809	-0.091271					250.342	99.8147	20.8822	-1.14118	11.5702	29.6633	0.000162403	0.0194798	3.07374e-07	0.119433	0.23887	-0.718132	-0.855109	0.0448173	0.00680192		5273.85	4942.13	2372.42	2852.23	2211.62	1773.96	2240.82	2656.94
ENSG00000108829	LRRC59	PC	leucine rich repeat containing 59		GO:0005635 (nuclear envelope), GO:0005783 (endoplasmic reticulum), GO:0005789 (endoplasmic reticulum membrane), GO:0016020 (membrane), GO:0016021 (integral component of membrane), GO:0031090 (organelle membrane), GO:0042645 (mitochondrial nucleoid), GO:0003723 (RNA binding), GO:0045296 (cadherin binding)			0.627289	0.447224		-0.158214	-0.170134	-0.113914		-0.28619	-0.185971	-0.160089					248.152	95.6863	59.9824	-0.712039	8.27401	25.4129	0.000312077	0.0260125	8.08137e-06	0.0685251	0.23887	-0.869318	-0.849973	0.00504681	0.00752061		466.503	411.531	269.802	267.566	278.278	246.73	264.623	269.449
ENSG00000150991	UBC	PC	ubiquitin C	This gene represents a ubiquitin gene, ubiquitin C. The encoded protein is a polyubiquitin precursor. Conjugation of ubiquitin monomers or polymers can lead to various effects within a cell, depending on the residues to which ubiquitin is conjugated. Ubiquitination has been associated with protein degradation, DNA repair, cell cycle regulation, kinase modification, endocytosis, and regulation of …	hsa03320 (PPAR signaling pathway), GO:0000086 (G2/M transition of mitotic cell cycle), GO:0000122 (negative regulation of transcription from RNA polymerase II promoter), GO:0000165 (MAPK cascade), GO:0000187 (activation of MAPK activity), GO:0000209 (protein polyubiquitination), GO:0000715 (nucleotide-excision repair, DNA damage recognition), GO:0000717 (nucleotide-excision repair, DNA duplex unw…			-0.551006	-0.525438		0.147877	0.0816808	0.115739		0.355765	0.278727	0.0966557					247.798	96.939	24.1288	0.74495	8.68975	27.1291	0.000237603	0.0221456	5.45825e-06	0.0956344	0.23887	0.793725	0.901982	0.0186875	0.00218457		274.511	279.455	446.845	426.716	436.957	516.414	489.458	431.189
ENSG00000121058	COIL	PC	coilin	The protein encoded by this gene is an integral component of Cajal bodies (also called coiled bodies). Cajal bodies are nuclear suborganelles of varying number and composition that are involved in the post-transcriptional modification of small nuclear and small nucleolar RNAs. The N-terminus of the coilin protein directs its self-oligomerization while the C-terminus influences the number of nucle…	GO:0001650 (fibrillar center), GO:0005634 (nucleus), GO:0005654 (nucleoplasm), GO:0005730 (nucleolus), GO:0015030 (Cajal body), GO:0016020 (membrane), GO:0016604 (nuclear body), GO:0005515 (protein binding), GO:0008022 (protein C-terminus binding), GO:0042802 (identical protein binding)			-0.634949	-0.191547		-0.158251	-0.0627407	0.0412412		0.391561	0.3689	0.245786					246.974	62.4559	56.727	0.784134	5.07071	23.7191	0.00041387	0.0291406	2.31425e-05	0.0439369	0.23887	0.944911	0.93017	0.000400878	0.000807307		20.2469	28.2515	28.9578	31.0767	33.5487	43.319	42.6127	38.9636
ENSG00000083520	DIS3	PC	DIS3 homolog, exosome endoribonuclease and 3'-5' exoribonuclease		hsa03018 (RNA degradation), GO:0006364 (rRNA processing), GO:0016075 (rRNA catabolic process), GO:0043488 (regulation of mRNA stability), GO:0043547 (positive regulation of GTPase activity), GO:0043928 (exonucleolytic nuclear-transcribed mRNA catabolic process involved in deadenylation-dependent decay), GO:0071034 (CUT catabolic process), GO:0090503 (RNA phosphodiester bond hydrolysis, exonucleol…			0.450808	0.891407		-0.154965	-0.186677	-0.00608678		-0.469111	-0.186677	-0.338698					246.812	33.0363	97.6268	-1.16638	3.4428	24.3171	0.000374019	0.0274493	8.37983e-06	0.0537348	0.23887	-0.912563	-0.847474	0.00156352	0.00788714		14.4789	20.3646	8.8286	8.59317	10.0057	6.70974	8.59317	7.53374
ENSG00000009844	VTA1	PC	vesicle trafficking 1	C6ORF55 encodes a protein involved in trafficking of the multivesicular body, an endosomal compartment involved in sorting membrane proteins for degradation in lysosomes (Ward et al., 2005 [PubMed 15644320]).[supplied by OMIM, Mar 2008].	hsa04144 (Endocytosis), GO:0015031 (protein transport), GO:0016197 (endosomal transport), GO:0016236 (macroautophagy), GO:0019058 (viral life cycle), GO:0036258 (multivesicular body assembly), GO:0046755 (viral budding), GO:0071985 (multivesicular body sorting pathway), GO:1904903 (NA), GO:0005654 (nucleoplasm), GO:0005829 (cytosol), GO:0010008 (endosome membrane), GO:0043231 (intracellular membr…			0.407929	0.749564		-0.019189	0.071837	-0.206652		-0.624003	-0.314101	-0.0653848					245.917	74.4884	90.6131	-0.91243	5.8404	25.0739	0.000329859	0.0261094	5.66871e-06	0.0685251	0.23887	-0.869318	-0.86185	0.00504681	0.00592757		73.3363	93.4655	54.031	57.6802	47.2036	34.8436	43.6722	52.2653
ENSG00000101558	VAPA	PC	VAMP associated protein A	The protein encoded by this gene is a type IV membrane protein. It is present in the plasma membrane and intracellular vesicles. It may also be associated with the cytoskeleton. This protein may function in vesicle trafficking, membrane fusion, protein complex assembly and cell motility. Alternative splicing occurs at this locus and two transcript variants encoding distinct isoforms have been ide…	hsa04979 (Cholesterol metabolism), GO:0006888 (ER to Golgi vesicle-mediated transport), GO:0007165 (signal transduction), GO:0008219 (cell death), GO:0030148 (sphingolipid biosynthetic process), GO:0031175 (neuron projection development), GO:0043123 (positive regulation of I-kappaB kinase/NF-kappaB signaling), GO:0043312 (neutrophil degranulation), GO:0044791 (positive regulation by host of viral…			0.477956	0.504143		-0.009176	-0.0945219	-0.155749		-0.431348	-0.244603	-0.0467004					245.644	94.9629	66.4049	-0.698447	8.11388	26.7801	0.000250889	0.023011	5.96049e-06	0.0956344	0.23887	-0.793725	-0.88375	0.0186875	0.00359303		377.158	384.103	268.507	252.969	242.375	199.88	227.778	261.562
ENSG00000167470	MIDN	PC	midnolin		GO:0033132 (negative regulation of glucokinase activity), GO:0046676 (negative regulation of insulin secretion), GO:0005730 (nucleolus), GO:0005829 (cytosol), GO:0019900 (kinase binding)			-0.299036	-0.389519		0.029027	-0.0873267	-0.00992023		0.366942	0.272725	0.117108					245.551	70.0335	59.4001	0.622399	5.5409	23.5163	0.000428503	0.0294394	7.63532e-05	0.0439369	0.23887	0.944911	0.941551	0.000400878	0.00047757		36.727	34.3727	46.615	42.8481	45.3202	59.4459	55.5613	49.6756
ENSG00000260894	AC027682.3	As						0.375976	1.06969		-0.129282	0.0797627	-0.242182		-0.591653	-0.40167	-0.160647					244.793	53.4757	0.873401	-1.2002	4.57068	24.9039	0.000339218	0.026159	4.17531e-06	0.0685251	0.23887	-0.869318	-0.799713	0.00504681	0.0171898		29.0755	48.263	19.8938	23.3075	18.2458	13.8903	16.1269	19.4229
ENSG00000164111	ANXA5	PC	annexin A5	The protein encoded by this gene belongs to the annexin family of calcium-dependent phospholipid binding proteins some of which have been implicated in membrane-related events along exocytotic and endocytotic pathways. Annexin 5 is a phospholipase A2 and protein kinase C inhibitory protein with calcium channel activity and a potential role in cellular signal transduction, inflammation, growth and…	GO:0002576 (platelet degranulation), GO:0007165 (signal transduction), GO:0007596 (blood coagulation), GO:0010033 (response to organic substance), GO:0043066 (negative regulation of apoptotic process), GO:0043086 (negative regulation of catalytic activity), GO:0050819 (negative regulation of coagulation), GO:0005576 (extracellular region), GO:0005622 (intracellular), GO:0005737 (cytoplasm), GO:00…			0.371377	0.70431		-0.206232	-0.0826438	-0.0878026		-0.311389	-0.183114	-0.204506					244.684	97.38	23.9259	-0.74368	8.86187	26.6252	0.000257067	0.023011	4.44552e-06	0.0956344	0.23887	-0.793725	-0.838579	0.0186875	0.00928324		585.277	737.718	391.519	426.716	425.185	363.856	397.876	391.99
ENSG00000160789	LMNA	PC	lamin A/C	The nuclear lamina consists of a two-dimensional matrix of proteins located next to the inner nuclear membrane. The lamin family of proteins make up the matrix and are highly conserved in evolution. During mitosis, the lamina matrix is reversibly disassembled as the lamin proteins are phosphorylated. Lamin proteins are thought to be involved in nuclear stability, chromatin structure and gene expr…	hsa04210 (Apoptosis), hsa05410 (Hypertrophic cardiomyopathy (HCM)), hsa05412 (Arrhythmogenic right ventricular cardiomyopathy (ARVC)), hsa05414 (Dilated cardiomyopathy (DCM)), GO:0007077 (mitotic nuclear envelope disassembly), GO:0007084 (mitotic nuclear envelope reassembly), GO:0008285 (negative regulation of cell proliferation), GO:0030334 (regulation of cell migration), GO:0030951 (establishme…			-0.323871	-0.280314		0.0319301	-0.0955665	0.0243512		0.287568	0.286663	0.069239					244.521	90.217	40.3705	0.522082	7.2643	23.3699	0.000439446	0.0294839	9.19169e-05	0.0439369	0.23887	0.944911	0.92723	0.000400878	0.000911574		120.893	124.66	155.266	141.964	154.442	185.754	185.636	159.386
ENSG00000198763	MT-ND2	PC	mitochondrially encoded NADH:ubiquinone oxidoreductase core subunit 2		hsa00190 (Oxidative phosphorylation), hsa01100 (Metabolic pathways), hsa04714 (Thermogenesis), hsa04723 (Retrograde endocannabinoid signaling), hsa05012 (Parkinson disease), R-HSA-1428517 (Homo sapiens: The citric acid (TCA) cycle and respiratory electron transport), R-HSA-1430728 (Homo sapiens: Metabolism), R-HSA-163200 (Homo sapiens: Respiratory electron transport, ATP synthesis by chemiosmotic…			0.706592	0.710242		-0.23611	0.0632511	-0.328987		-0.505495	-0.278838	-0.130655					244.244	99.8765	26.0432	-0.956389	12.0612	28.599	0.000189968	0.0207769	9.09968e-07	0.119433	0.23887	-0.718132	-0.859985	0.0448173	0.00616183		6642.64	6659.47	3454.93	4252.09	3239.39	2866.12	3354.04	3717.08
ENSG00000182220	ATP6AP2	PC	ATPase H+ transporting accessory protein 2	This gene encodes a protein that is associated with adenosine triphosphatases (ATPases). Proton-translocating ATPases have fundamental roles in energy conservation, secondary active transport, acidification of intracellular compartments, and cellular pH homeostasis. There are three classes of ATPases- F, P, and V. The vacuolar (V-type) ATPases have a transmembrane proton-conducting sector and an …	hsa04614 (Renin-angiotensin system), GO:0002003 (angiotensin maturation), GO:0021903 (rostrocaudal neural tube patterning), GO:0030177 (positive regulation of Wnt signaling pathway), GO:0032914 (positive regulation of transforming growth factor beta1 production), GO:0043312 (neutrophil degranulation), GO:0043408 (regulation of MAPK cascade), GO:0048069 (eye pigmentation), GO:0060323 (head morphog…			0.569045	0.653236		-0.174984	-0.11304	-0.230005		-0.305433	-0.206983	-0.191836					244.194	85.2064	53.8421	-0.81459	6.71022	26.5461	0.000260287	0.023011	3.85326e-06	0.0956344	0.23887	-0.793725	-0.856118	0.0186875	0.00666619		150.793	159.974	89.2277	93.23	85.814	81.3409	87.2266	88.1683
ENSG00000134996	OSTF1	PC	osteoclast stimulating factor 1	Osteoclast-stimulating factor-1 is an intracellular protein produced by osteoclasts that indirectly induces osteoclast formation and bone resorption (Reddy et al., 1998 [PubMed 10092216]).[supplied by OMIM, Mar 2008]. Sequence Note: This RefSeq record was created from transcript and genomic sequence data because no single transcript was available for the full length of the gene. The extent of thi…	GO:0001503 (ossification), GO:0007165 (signal transduction), GO:0043312 (neutrophil degranulation), GO:0005576 (extracellular region), GO:0005622 (intracellular), GO:0034774 (secretory granule lumen), GO:0070062 (extracellular vesicular exosome), GO:1904813 (NA), GO:0005515 (protein binding), GO:0017124 (SH3 domain binding), R-HSA-168249 (Homo sapiens: Innate Immune System), R-HSA-168256 (Homo sa…			-0.343077	-0.343077		-0.0287231	-0.0908814	-0.0594675		0.380883	0.416428	0.0679154					242.866	65.8874	43.5906	0.68046	5.27805	23.0324	0.000465944	0.0295809	6.17938e-05	0.0423134	0.23887	0.950586	0.904227	0.000290566	0.00204145		29.4287	29.4287	37.0801	35.4321	36.2561	49.911	51.2059	39.7876
ENSG00000185009	AP3M1	PC	adaptor related protein complex 3 subunit mu 1	The protein encoded by this gene is the medium subunit of AP-3, which is an adaptor-related protein complex associated with the Golgi region as well as more peripheral intracellular structures. AP-3 facilitates the budding of vesicles from the Golgi membrane and may be directly involved in protein sorting to the endosomal/lysosomal system. AP-3 is a heterotetrameric protein complex composed of tw…	hsa04142 (Lysosome), GO:0006622 (protein targeting to lysosome), GO:0008089 (anterograde axon cargo transport), GO:0048490 (anterograde synaptic vesicle transport), GO:0005764 (lysosome), GO:0005765 (lysosomal membrane), GO:0005794 (Golgi apparatus), GO:0030131 (clathrin adaptor complex), GO:0030659 (cytoplasmic vesicle membrane), GO:1904115 (NA), GO:0005515 (protein binding), GO:0017137 (Rab GTP…			0.534143	0.490641		-0.0961811	0.211314	-0.158305		-0.624265	-0.187453	-0.169894					241.603	61.3885	76.5682	-0.862019	5.00612	22.9565	0.000472155	0.0295809	1.9074e-05	0.0439369	0.23887	-0.944911	-0.900026	0.000400878	0.00231451		45.5556	44.143	28.7224	36.0207	27.4275	19.3052	26.839	27.1921
ENSG00000164818	DNAAF5	PC	dynein axonemal assembly factor 5	The protein encoded by this gene is essential for the preassembly or stability of axonemal dynein arms, and is found only in organisms with motile cilia and flagella. Mutations in this gene are associated with primary ciliary dyskinesia-18, a disorder characterized by abnormalities of motile cilia. Alternatively spliced transcript variants have been found for this gene. [provided by RefSeq, Feb 2…	GO:0003341 (cilium movement), GO:0036158 (outer dynein arm assembly), GO:0036159 (inner dynein arm assembly), GO:0005737 (cytoplasm), GO:0045505 (dynein intermediate chain binding)			0.435626	0.363791		-0.0907904	-0.0555995	0.179164		-0.386259	-0.294512	-0.151419					241.514	58.8391	55.1831	-0.713613	4.87192	22.9439	0.000473194	0.0295809	5.18573e-05	0.0439369	0.23887	-0.944911	-0.935046	0.000400878	0.000652177		39.199	37.1978	26.6035	27.3098	32.4893	21.3064	22.8367	25.4264
ENSG00000138688	KIAA1109	PC	KIAA1109	This gene is located on the long arm of chromosome 4 in a region that is associated with susceptibility to celiac disease. The encoded protein is similar to a Chinese hamster protein that is associated with spermatocyte and adipocyte differentiation. The C-terminus of the protein is also similar to a Caenorhabditis elegans protein that plays a role in lipid storage. In mammals, this protein is th…	GO:0001558 (regulation of cell growth), GO:0030856 (regulation of epithelial cell differentiation), GO:0005634 (nucleus), GO:0016020 (membrane), GO:0016021 (integral component of membrane), GO:0005515 (protein binding)			0.645126	0.718506		-0.134362	-0.293585	0.0849805		-0.500072	-0.342503	-0.17809					241.314	22.0713	96.4094	-1.26581	2.86756	24.3803	0.00037008	0.0274493	5.36896e-06	0.0685251	0.23887	-0.869318	-0.892881	0.00504681	0.00283123		11.536	12.2423	5.88573	5.06173	7.1806	4.12001	4.8263	5.65031
ENSG00000049245	VAMP3	PC	vesicle associated membrane protein 3	Synaptobrevins/VAMPs, syntaxins, and the 25-kD synaptosomal-associated protein are the main components of a protein complex involved in the docking and/or fusion of synaptic vesicles with the presynaptic membrane. This gene is a member of the vesicle-associated membrane protein (VAMP)/synaptobrevin family. Because of its high homology to other known VAMPs, its broad tissue distribution, and its s…	hsa04130 (SNARE interactions in vesicular transport), hsa04145 (Phagosome), GO:0001921 (positive regulation of receptor recycling), GO:0002479 (antigen processing and presentation of exogenous peptide antigen via MHC class I, TAP-dependent), GO:0006461 (protein complex assembly), GO:0006887 (exocytosis), GO:0006904 (vesicle docking involved in exocytosis), GO:0006906 (vesicle fusion), GO:0016192 …			0.677914	0.394295		-0.16191	-0.197233	-0.0891727		-0.212107	-0.203412	-0.208374					241.216	90.6757	32.9687	-0.717727	7.3258	22.9018	0.000476697	0.0295809	2.00882e-05	0.0439369	0.23887	-0.944911	-0.829971	0.000400878	0.010775		250.615	205.53	139.139	135.725	146.437	134.312	135.136	134.666
ENSG00000101464	PIGU	PC	phosphatidylinositol glycan anchor biosynthesis class U	The protein encoded by this gene shares similarity with Saccharomyces cerevisiae Cdc91, a predicted integral membrane protein that may function in cell division control. The protein encoded by this gene is the fifth subunit of GPI transamidase that attaches GPI-anchors to proteins. [provided by RefSeq, Jul 2008].	hsa00563 (Glycosylphosphatidylinositol (GPI)-anchor biosynthesis), hsa01100 (Metabolic pathways), GO:0006506 (GPI anchor biosynthetic process), GO:0016255 (attachment of GPI anchor to protein), GO:0046425 (regulation of JAK-STAT cascade), GO:0005789 (endoplasmic reticulum membrane), GO:0005886 (plasma membrane), GO:0016020 (membrane), GO:0030176 (integral component of endoplasmic reticulum membra…			0.370973	0.303002		-0.0687153	-0.0687153	0.0256845		-0.241929	-0.196125	-0.124174					240.799	83.7509	19.9647	-0.518746	6.5579	22.7415	0.00049029	0.0296649	0.000118376	0.0423134	0.23887	-0.950586	-0.934459	0.000290566	0.000669709		120.775	115.125	88.5215	88.5215	94.6426	78.2803	80.87	85.1077
ENSG00000147955	SIGMAR1	PC	sigma non-opioid intracellular receptor 1	This gene encodes a receptor protein that interacts with a variety of psychotomimetic drugs, including cocaine and amphetamines. The receptor is believed to play an important role in the cellular functions of various tissues associated with the endocrine, immune, and nervous systems. As indicated by its previous name, opioid receptor sigma 1 (OPRS1), the product of this gene was erroneously thoug…	GO:0006869 (lipid transport), GO:0007399 (nervous system development), GO:0038003 (opioid receptor signaling pathway), GO:0043523 (regulation of neuron apoptotic process), GO:0070207 (protein homotrimerization), GO:0005635 (nuclear envelope), GO:0005637 (nuclear inner membrane), GO:0005640 (nuclear outer membrane), GO:0005783 (endoplasmic reticulum), GO:0005789 (endoplasmic reticulum membrane), G…			0.278506	0.354914		-0.00419483	0.101794	-0.0880312		-0.386916	-0.148667	-0.107404					240.726	96.0303	31.3542	-0.522237	8.36882	22.8327	0.000482501	0.0295809	7.58126e-05	0.0439369	0.23887	-0.944911	-0.918592	0.000400878	0.00126777		396.228	417.887	325.363	350.319	306.882	249.084	294.169	302.762
ENSG00000196305	IARS	PC	isoleucyl-tRNA synthetase	Aminoacyl-tRNA synthetases catalyze the aminoacylation of tRNA by their cognate amino acid. Because of their central role in linking amino acids with nucleotide triplets contained in tRNAS, aminoacyl-tRNA synthetases are thought to be among the first proteins that appeared in evolution. Isoleucine-tRNA synthetase belongs to the class-I aminoacyl-tRNA synthetase family and has been identified as a…	hsa00970 (Aminoacyl-tRNA biosynthesis), GO:0001649 (osteoblast differentiation), GO:0006418 (tRNA aminoacylation for protein translation), GO:0006428 (isoleucyl-tRNA aminoacylation), GO:0006450 (regulation of translational fidelity), GO:0005737 (cytoplasm), GO:0005829 (cytosol), GO:0016020 (membrane), GO:0017101 (aminoacyl-tRNA synthetase multienzyme complex), GO:0070062 (extracellular vesicular …			0.710644	0.618279		-0.13067	-0.186111	-0.174261		-0.428477	-0.0828099	-0.326595					239.9	77.2495	70.8072	-0.919472	6.04233	27.8484	0.00021273	0.0212188	1.82374e-06	0.119433	0.23887	-0.718132	-0.863228	0.0448173	0.00575815		104.295	97.7032	57.3271	55.0905	55.5613	46.2619	59.3282	49.7933
ENSG00000086666	ZFAND6	PC	zinc finger AN1-type containing 6		GO:0006625 (protein targeting to peroxisome), GO:0006915 (apoptotic process), GO:0043066 (negative regulation of apoptotic process), GO:0043122 (regulation of I-kappaB kinase/NF-kappaB signaling), GO:0071356 (cellular response to tumor necrosis factor), GO:0005575 (cellular_component), GO:0005737 (cytoplasm), GO:0003674 (molecular_function), GO:0003677 (DNA binding), GO:0005515 (protein binding),…			0.387038	0.56284		-0.00431532	-0.0125127	-0.114696		-0.39639	-0.380389	-0.041576					239.828	67.0078	25.9815	-0.756113	5.35527	24.1576	0.00038419	0.027495	2.00766e-05	0.0685251	0.23887	-0.869318	-0.898733	0.00504681	0.00240304		52.5008	59.5636	39.5521	39.3167	36.4916	29.6641	30.0172	38.4927
ENSG00000210194	MT-TE	Mt_tRNA	mitochondrially encoded tRNA glutamic acid					1.76502	1.2625		-0.763222	-0.111054	-0.441243		-0.763222	-0.0786285	-0.870156					239.43	36.1856	0.185267	-2.38982	3.63275	28.7747	0.000185061	0.0205672	2.65605e-07	0.12489	0.23887	-0.684422	-0.809696	0.0611479	0.0148643		36.0207	24.8378	4.59087	8.35774	6.23888	4.59087	8.59317	4.12001
ENSG00000138600	SPPL2A	PC	signal peptide peptidase like 2A	This gene encodes a member of the GXGD family of aspartic proteases, which are transmembrane proteins with two conserved catalytic motifs localized within the membrane-spanning regions, as well as a member of the signal peptide peptidase-like protease (SPPL) family. This protein is expressed in all major adult human tissues and localizes to late endosomal compartments and lysosomal membranes. A p…	GO:0006509 (membrane protein ectodomain proteolysis), GO:0010803 (regulation of tumor necrosis factor-mediated signaling pathway), GO:0031293 (membrane protein intracellular domain proteolysis), GO:0033619 (membrane protein proteolysis), GO:0050776 (regulation of immune response), GO:0005765 (lysosomal membrane), GO:0005770 (late endosome), GO:0005886 (plasma membrane), GO:0016020 (membrane), GO:…			0.573096	0.628348		-0.282754	-0.119808	0.082444		-0.457598	-0.282754	-0.140973					239.315	55.3282	62.1879	-0.924972	4.67492	24.7786	0.00034632	0.0263482	9.37484e-06	0.0796494	0.23887	-0.836516	-0.885303	0.00962802	0.00345519		37.1978	38.7281	19.6584	22.2481	25.8972	17.1863	19.6584	21.8949
ENSG00000163041	H3F3A	PC	H3 histone family member 3A	Histones are basic nuclear proteins that are responsible for the nucleosome structure of the chromosomal fiber in eukaryotes. Two molecules of each of the four core histones (H2A, H2B, H3, and H4) form an octamer, around which approximately 146 bp of DNA is wrapped in repeating units, called nucleosomes. The linker histone, H1, interacts with linker DNA between nucleosomes and functions in the co…	hsa05034 (Alcoholism), hsa05202 (Transcriptional misregulation in cancer), hsa05322 (Systemic lupus erythematosus), GO:0000183 (chromatin silencing at rDNA), GO:0001649 (osteoblast differentiation), GO:0006334 (nucleosome assembly), GO:0006336 (DNA replication-independent nucleosome assembly), GO:0006997 (nucleus organization), GO:0007286 (spermatid development), GO:0007338 (single fertilization)…			-0.348374	-0.546949		-0.155704	0.0142408	-0.0513548		0.533662	0.290599	0.26388					239.31	27.62	40.3441	1.01576	3.17075	22.6332	0.000499736	0.0299736	3.32709e-05	0.0439369	0.23887	0.944911	0.936473	0.000400878	0.000610789		6.23888	5.17945	7.41603	8.59317	8.12231	13.184	10.8298	10.5943
ENSG00000170396	ZNF804A	PC	zinc finger protein 804A		GO:0003676 (nucleic acid binding), GO:0046872 (metal ion binding)			0.722851	0.560291		-0.0683769	0.0208964	-0.313129		-0.413539	-0.301055	-0.207938					239.069	43.825	96.9034	-1.0288	4.03101	25.7238	0.000296754	0.0251045	6.03849e-06	0.0956344	0.23887	-0.793725	-0.884864	0.0186875	0.00349383		26.7212	23.6607	14.5966	15.6561	12.0069	11.0652	12.1246	13.0663
ENSG00000067082	KLF6	PC	Kruppel like factor 6	This gene encodes a member of the Kruppel-like family of transcription factors. The zinc finger protein is a transcriptional activator, and functions as a tumor suppressor. Multiple transcript variants encoding different isoforms have been found for this gene, some of which are implicated in carcinogenesis. [provided by RefSeq, May 2009].	GO:0006366 (transcription from RNA polymerase II promoter), GO:0030183 (B cell differentiation), GO:0045893 (positive regulation of transcription, DNA-templated), GO:0045944 (positive regulation of transcription from RNA polymerase II promoter), GO:0001650 (fibrillar center), GO:0005634 (nucleus), GO:0005730 (nucleolus), GO:0005829 (cytosol), GO:0043231 (intracellular membrane-bounded organelle),…			-0.793189	-0.561818		0.191195	0.222563	-0.272264		0.516322	0.327271	0.369919					238.804	24.7442	74.1509	1.34135	3.00876	22.5621	0.000506056	0.0301929	1.29135e-05	0.0439369	0.23887	0.944911	0.921653	0.000400878	0.00113275		3.41373	4.35544	8.71089	8.94632	5.76802	11.4183	9.77032	10.1235
ENSG00000177917	ARL6IP6	PC	ADP ribosylation factor like GTPase 6 interacting protein 6		GO:0016021 (integral component of membrane)			-0.737388	-0.379739		-0.451907	-0.527875	-0.527875		1.21714	1.05734	0.350308					238.641	14.4054	41.8791	2.38528	2.44084	26.4831	0.000262886	0.023011	7.21555e-07	0.0796494	0.23887	0.760469	0.789101	0.0284811	0.0198982		1.76572	2.82515	2.58972	2.35429	2.35429	12.5955	11.0652	6.00345
ENSG00000269307	AC010463.1	PC						0.403109	0.280106		0.00381031	-0.0624824	-0.0378199		-0.187604	-0.276611	-0.122508					237.405	80.5222	36.8505	-0.535422	6.2775	22.3657	0.000523996	0.0309376	0.000124935	0.0439369	0.23887	-0.944911	-0.930598	0.000400878	0.000792823		101.705	93.23	76.6323	73.1008	74.3957	66.8619	62.7419	70.0402
ENSG00000101346	POFUT1	PC	protein O-fucosyltransferase 1	This gene encodes a member of the glycosyltransferase O-Fuc family. This enzyme adds O-fucose through an O-glycosidic linkage to conserved serine or threonine residues in the epidermal growth factor-like repeats of a number of cell surface and secreted proteins. O-fucose glycans are involved in ligand-induced receptor signaling. Alternative splicing of this gene results in two transcript variants…	hsa00514 (Other types of O-glycan biosynthesis), GO:0001525 (angiogenesis), GO:0001756 (somitogenesis), GO:0006004 (fucose metabolic process), GO:0006355 (regulation of transcription, DNA-templated), GO:0006493 (protein O-linked glycosylation), GO:0007219 (Notch signaling pathway), GO:0007399 (nervous system development), GO:0007507 (heart development), GO:0009790 (embryo development), GO:0016266…			-0.438503	-0.511111		0.0954385	-0.0525014	-0.0798531		0.574756	0.347231	0.0645432					237.174	54.79	66.4226	0.877806	4.64214	23.7615	0.00041089	0.0291116	2.57442e-05	0.0685251	0.23887	0.869318	0.879466	0.00504681	0.0039917		17.1863	16.2446	25.7795	23.0721	22.6012	36.727	31.0767	25.1909
ENSG00000157193	LRP8	PC	LDL receptor related protein 8	This gene encodes a member of the low density lipoprotein receptor (LDLR) family. Low density lipoprotein receptors are cell surface proteins that play roles in both signal transduction and receptor-mediated endocytosis of specific ligands for lysosomal degradation. The encoded protein plays a critical role in the migration of neurons during development by mediating Reelin signaling, and also fun…	GO:0000122 (negative regulation of transcription from RNA polymerase II promoter), GO:0001523 (retinoid metabolic process), GO:0006508 (proteolysis), GO:0006629 (lipid metabolic process), GO:0006897 (endocytosis), GO:0006898 (receptor-mediated endocytosis), GO:0007165 (signal transduction), GO:0019221 (cytokine-mediated signaling pathway), GO:0021541 (ammon gyrus development), GO:0021987 (cerebra…			-0.901875	-0.51712		0.250343	-0.140903	0.0983203		0.452	0.387863	0.371373					236.875	19.0279	81.6409	1.44032	2.70453	22.2914	0.000530983	0.0311877	9.37486e-06	0.0439369	0.23887	0.944911	0.944953	0.000400878	0.00039998		2.23658	3.53144	7.41603	5.17945	6.47431	8.8286	8.35774	8.24003
ENSG00000120709	FAM53C	PC	family with sequence similarity 53 member C		GO:0005515 (protein binding)			-0.320403	-0.525892		0.0689006	-0.12934	-0.0637464		0.217008	0.294089	0.459383					236.08	41.9548	37.6356	0.85024	3.92739	22.1802	0.000541631	0.0315542	5.78963e-05	0.0439369	0.23887	0.944911	0.94205	0.000400878	0.000465611		11.3006	9.53489	15.4206	13.184	13.8903	17.3041	18.3635	20.8355
ENSG00000111206	FOXM1	PC	forkhead box M1	The protein encoded by this gene is a transcriptional activator involved in cell proliferation. The encoded protein is phosphorylated in M phase and regulates the expression of several cell cycle genes, such as cyclin B1 and cyclin D1. Several transcript variants encoding different isoforms have been found for this gene. [provided by RefSeq, Jul 2011].	hsa04218 (Cellular senescence), GO:0000086 (G2/M transition of mitotic cell cycle), GO:0000122 (negative regulation of transcription from RNA polymerase II promoter), GO:0006281 (DNA repair), GO:0006351 (transcription, DNA-templated), GO:0006978 (DNA damage response, signal transduction by p53 class mediator resulting in transcription of p21 class mediator), GO:0008284 (positive regulation of cel…			-0.379756	-0.441197		0.153563	0.0819129	0.0252233		0.18039	0.159846	0.220019					235.461	94.1514	73.0128	0.568242	7.93061	22.0937	0.000550091	0.0315542	8.15766e-05	0.0439369	0.23887	0.944911	0.916018	0.000400878	0.00138912		184.341	176.572	267.683	254.617	244.729	272.745	268.86	280.396
ENSG00000147677	EIF3H	PC	eukaryotic translation initiation factor 3 subunit H		hsa03013 (RNA transport), hsa05162 (Measles), GO:0006413 (translational initiation), GO:0006446 (regulation of translational initiation), GO:0005829 (cytosol), GO:0005852 (eukaryotic translation initiation factor 3 complex), GO:0016020 (membrane), GO:0070062 (extracellular vesicular exosome), GO:0071541 (eukaryotic translation initiation factor 3 complex, eIF3m), GO:0003723 (RNA binding), GO:0003…			0.611135	0.525939		-0.205777	-0.128215	-0.1762		-0.223181	-0.249418	-0.154283					235.226	96.6037	31.8041	-0.734398	8.57981	25.1126	0.000327767	0.0261094	7.49828e-06	0.0956344	0.23887	-0.793725	-0.847751	0.0186875	0.00784595		568.68	535.955	321.95	339.842	328.659	318.065	312.297	333.721
ENSG00000101363	MANBAL	PC	mannosidase beta like		GO:0016021 (integral component of membrane), GO:0005515 (protein binding)			0.371757	0.236521		-0.0199667	0.0156575	0.0110605		-0.324364	-0.198347	-0.0923184					235.184	85.9651	45.7521	-0.509483	6.77096	22.055	0.000553925	0.0315542	0.000146269	0.0439369	0.23887	-0.944911	-0.937535	0.000400878	0.000581134		140.08	127.367	106.296	109.004	108.651	85.6963	93.7009	100.999
ENSG00000076248	UNG	PC	uracil DNA glycosylase	This gene encodes one of several uracil-DNA glycosylases. One important function of uracil-DNA glycosylases is to prevent mutagenesis by eliminating uracil from DNA molecules by cleaving the N-glycosylic bond and initiating the base-excision repair (BER) pathway. Uracil bases occur from cytosine deamination or misincorporation of dUMP residues. Alternative promoter usage and splicing of this gene…	hsa03410 (Base excision repair), hsa05340 (Primary immunodeficiency), GO:0006281 (DNA repair), GO:0006284 (base-excision repair), GO:0016032 (viral process), GO:0016446 (somatic hypermutation of immunoglobulin genes), GO:0016447 (somatic recombination of immunoglobulin gene segments), GO:0043066 (negative regulation of apoptotic process), GO:0045008 (depyrimidination), GO:0045830 (positive regula…			0.434038	0.407011		-0.133711	-0.0630978	-0.0697822		-0.2203	-0.222781	-0.131378					234.524	80.8751	66.3255	-0.598313	6.30944	23.3681	0.000439584	0.0294839	5.20046e-05	0.0685251	0.23887	-0.869318	-0.899283	0.00504681	0.00236512		105.826	103.824	70.7465	74.3957	74.0425	66.5088	66.3911	70.8642
ENSG00000275854	AC084824.4	sense_intronic						0.460976	0.99535		-0.149142	-0.0395036	-0.267802		-0.442915	-0.309628	-0.247335					234.108	26.8172	10.4191	-1.29246	3.12525	23.3064	0.000444293	0.0294839	1.05142e-05	0.0685251	0.23887	-0.869318	-0.819791	0.00504681	0.0127246		11.6538	17.7749	6.94517	7.65146	6.23888	5.29716	6.00345	6.35659
ENSG00000234478	ACBD3-AS1	As	ACBD3 antisense RNA 1					0.486289	0.585149		0.0609485	0.0049091	-0.177588		-0.405421	-0.424532	-0.129754					233.337	31.7661	4.34054	-0.994935	3.38504	23.1925	0.000453149	0.0295809	1.91362e-05	0.0685251	0.23887	-0.869318	-0.926016	0.00504681	0.000957062		14.5966	15.7738	10.3589	9.88803	8.47546	6.94517	6.82745	8.8286
ENSG00000242539	AC007620.2	As						0.894823	0.879663		-0.161612	-0.315952	-0.20405		-0.597747	-0.070458	-0.424667					233.06	46.2332	23.9524	-1.3194	4.15535	26.6793	0.000254887	0.023011	1.5344e-06	0.119433	0.23887	-0.718132	-0.854179	0.0448173	0.00692872		31.783	31.4298	14.2435	12.5955	13.7726	10.0057	15.3029	11.536
ENSG00000169981	ZNF35	PC	zinc finger protein 35		GO:0006351 (transcription, DNA-templated), GO:0006355 (regulation of transcription, DNA-templated), GO:0007283 (spermatogenesis), GO:0071300 (cellular response to retinoic acid), GO:0005623 (cell), GO:0005634 (nucleus), GO:0048471 (perinuclear region of cytoplasm), GO:0003677 (DNA binding), GO:0003700 (sequence-specific DNA binding transcription factor activity), GO:0043565 (sequence-specific DNA…			0.569154	0.319416		-0.0110859	0.0721774	-0.0254426		-0.209886	-0.311778	-0.402554					232.129	31.8719	39.0472	-0.89362	3.39112	21.6297	0.000598215	0.0327602	5.95621e-05	0.0439369	0.23887	-0.944911	-0.939768	0.000400878	0.000521907		15.7738	12.9486	9.88803	10.5943	9.77032	8.35774	7.65146	7.06288
ENSG00000170498	KISS1	PC	KiSS-1 metastasis suppressor	This gene is a metastasis suppressor gene that suppresses metastases of melanomas and breast carcinomas without affecting tumorigenicity. The encoded protein may inhibit chemotaxis and invasion and thereby attenuate metastasis in malignant melanomas. Studies suggest a putative role in the regulation of events downstream of cell-matrix adhesion, perhaps involving cytoskeletal reorganization. A pro…	GO:0007010 (cytoskeleton organization), GO:0008285 (negative regulation of cell proliferation), GO:0033686 (positive regulation of luteinizing hormone secretion), GO:0043410 (positive regulation of MAPK cascade), GO:0046697 (decidualization), GO:0050806 (positive regulation of synaptic transmission), GO:0051482 (positive regulation of cytosolic calcium ion concentration involved in phospholipase …			-0.385283	-0.504642		0.0297561	0.0205683	0.210688		0.255012	0.255758	0.118142					232.107	96.639	5.48743	0.6235	8.59301	23.0109	0.000467696	0.0295809	3.98855e-05	0.0685251	0.23887	0.869318	0.897115	0.00504681	0.00251694		290.049	266.859	387.399	384.927	439.429	453.202	453.437	412.001
ENSG00000011304	PTBP1	PC	polypyrimidine tract binding protein 1	This gene belongs to the subfamily of ubiquitously expressed heterogeneous nuclear ribonucleoproteins (hnRNPs). The hnRNPs are RNA-binding proteins and they complex with heterogeneous nuclear RNA (hnRNA). These proteins are associated with pre-mRNAs in the nucleus and appear to influence pre-mRNA processing and other aspects of mRNA metabolism and transport. While all of the hnRNPs are present in…	GO:0000380 (alternative mRNA splicing, via spliceosome), GO:0000381 (regulation of alternative mRNA splicing, via spliceosome), GO:0000398 (mRNA splicing, via spliceosome), GO:0006397 (mRNA processing), GO:0008380 (RNA splicing), GO:0008543 (fibroblast growth factor receptor signaling pathway), GO:0010467 (gene expression), GO:0033119 (negative regulation of RNA splicing), GO:0048025 (negative re…			-0.401708	-0.278888		0.0714887	0.0165478	0.0697202		0.152674	0.120575	0.24959					231.592	96.4714	60	0.495061	8.52231	21.5553	0.000606383	0.0330479	0.000157117	0.0439369	0.23887	0.944911	0.931164	0.000400878	0.00077391		274.864	299.466	382.337	367.976	381.866	404.585	395.639	432.837
ENSG00000161980	POLR3K	PC	RNA polymerase III subunit K	This gene encodes a small essential subunit of RNA polymerase III, the polymerase responsible for synthesizing transfer and small ribosomal RNAs in eukaryotes. The carboxy-terminal domain of this subunit shares a high degree of sequence similarity to the carboxy-terminal domain of an RNA polymerase II elongation factor. This similarity in sequence is supported by functional studies showing that t…	hsa01100 (Metabolic pathways), hsa03020 (RNA polymerase), hsa04623 (Cytosolic DNA-sensing pathway), GO:0006379 (mRNA cleavage), GO:0006383 (transcription from RNA polymerase III promoter), GO:0032481 (positive regulation of type I interferon production), GO:0045087 (innate immune response), GO:0051607 (defense response to virus), GO:0005654 (nucleoplasm), GO:0005666 (DNA-directed RNA polymerase I…			-0.286149	-0.803101		-0.138243	-0.198682	0.137083		0.668086	0.50238	0.118625					231.053	54.4019	33.3657	1.05939	4.62331	22.8557	0.000480563	0.0295809	1.32842e-05	0.0685251	0.23887	0.869318	0.858174	0.00504681	0.00639489		18.7166	12.4778	20.9532	20.0115	25.7795	38.1396	33.7841	25.4264
ENSG00000160007	ARHGAP35	PC	Rho GTPase activating protein 35	The human glucocorticoid receptor DNA binding factor, which associates with the promoter region of the glucocorticoid receptor gene (hGR gene), is a repressor of glucocorticoid receptor transcription. The amino acid sequence deduced from the cDNA sequences show the presence of three sequence motifs characteristic of a zinc finger and one motif suggestive of a leucine zipper in which 1 cysteine is…	hsa04510 (Focal adhesion), hsa04611 (Platelet activation), hsa04670 (Leukocyte transendothelial migration), hsa04810 (Regulation of actin cytoskeleton), GO:0000122 (negative regulation of transcription from RNA polymerase II promoter), GO:0001843 (neural tube closure), GO:0006351 (transcription, DNA-templated), GO:0007165 (signal transduction), GO:0007411 (axon guidance), GO:0007413 (axonal fasci…			-0.610663	-0.426223		0.115822	-0.0169402	0.0592358		0.47841	0.230086	0.170273					230.092	47.036	94.0626	0.876415	4.21028	21.3477	0.000629878	0.0332107	6.51047e-05	0.0439369	0.23887	0.944911	0.92059	0.000400878	0.00117852		10.9475	12.7132	19.4229	17.5395	18.5989	25.5441	21.1886	20.2469
ENSG00000146066	HIGD2A	PC	HIG1 hypoxia inducible domain family member 2A		GO:0043066 (negative regulation of apoptotic process), GO:0055114 (oxidation-reduction process), GO:0005743 (mitochondrial inner membrane), GO:0016021 (integral component of membrane), GO:0070469 (respiratory chain)			-0.380485	-0.29199		0.0658061	0.0921848	-0.0300545		0.268934	0.146789	0.128816					228.913	92.3077	8.26643	0.504124	7.56318	21.1849	0.000649051	0.0334263	0.000179043	0.0439369	0.23887	0.944911	0.930191	0.000400878	0.000806601		143.141	152.323	195.76	199.409	183.046	225.659	207.178	204.588
ENSG00000081181	ARG2	PC	arginase 2	Arginase catalyzes the hydrolysis of arginine to ornithine and urea. At least two isoforms of mammalian arginase exists (types I and II) which differ in their tissue distribution, subcellular localization, immunologic crossreactivity and physiologic function. The type II isoform encoded by this gene, is located in the mitochondria and expressed in extra-hepatic tissues, especially kidney. The phy…	hsa00220 (Arginine biosynthesis), hsa00330 (Arginine and proline metabolism), hsa01100 (Metabolic pathways), hsa01230 (Biosynthesis of amino acids), hsa05146 (Amoebiasis), GO:0000050 (urea cycle), GO:0001657 (ureteric bud development), GO:0006525 (arginine metabolic process), GO:0006809 (nitric oxide biosynthetic process), GO:0006941 (striated muscle contraction), GO:0005739 (mitochondrion), GO:0…			0.419674	0.707124		-0.168159	0.0159337	-0.0691874		-0.168159	-0.569066	-0.168159					227.01	50.7586	22.9907	-0.912468	4.41719	21.8627	0.000573462	0.0322103	3.03353e-05	0.0599297	0.23887	-0.890786	-0.871761	0.00299574	0.00477826		27.8984	34.4904	17.8926	20.6001	19.3052	17.8926	13.0663	17.8926
ENSG00000233954	UQCRHL	PC	ubiquinol-cytochrome c reductase hinge protein like	This gene has characteristics of a pseudogene derived from the UQCRH gene. However, there is still an open reading frame that could produce a protein of the same or nearly the same size as that of the UQCRH gene, so this gene is being called protein-coding for now. [provided by RefSeq, Jul 2008].	hsa00190 (Oxidative phosphorylation), hsa01100 (Metabolic pathways), hsa04260 (Cardiac muscle contraction), hsa04714 (Thermogenesis), hsa04932 (Non-alcoholic fatty liver disease (NAFLD)), hsa05010 (Alzheimer disease), hsa05012 (Parkinson disease), hsa05016 (Huntington disease), GO:0006122 (mitochondrial electron transport, ubiquinol to cytochrome c), GO:0009060 (aerobic respiration), GO:1902600 (…			-0.329068	-0.664689		0.186205	-0.15009	0.0723106		0.414713	0.246814	0.223803					226.937	59.8624	78.1385	0.813355	4.92529	20.9128	0.000682647	0.0339453	6.06691e-05	0.0439369	0.23887	0.944911	0.909848	0.000400878	0.00171011		22.9544	17.7749	33.6664	26.2504	30.959	39.7876	35.1967	34.6081
ENSG00000251022	THAP9-AS1	As	THAP9 antisense RNA 1					0.71555	0.62628		-0.0828423	-0.306291	-0.133919		-0.444534	-0.160151	-0.214093					226.069	57.8335	20.9793	-0.959082	4.81423	23.6745	0.000417039	0.0291825	1.07593e-05	0.0956344	0.23887	-0.793725	-0.857584	0.0186875	0.00647196		45.0847	42.2596	25.0732	21.1886	24.1315	19.0698	23.6607	22.7189
ENSG00000092820	EZR	PC	ezrin	The cytoplasmic peripheral membrane protein encoded by this gene functions as a protein-tyrosine kinase substrate in microvilli. As a member of the ERM protein family, this protein serves as an intermediate between the plasma membrane and the actin cytoskeleton. This protein plays a key role in cell surface structure adhesion, migration and organization, and it has been implicated in various huma…	hsa04530 (Tight junction), hsa04670 (Leukocyte transendothelial migration), hsa04810 (Regulation of actin cytoskeleton), hsa04971 (Gastric acid secretion), hsa05130 (Pathogenic Escherichia coli infection), hsa05205 (Proteoglycans in cancer), hsa05206 (MicroRNAs in cancer), GO:0000122 (negative regulation of transcription from RNA polymerase II promoter), GO:0001951 (intestinal D-glucose absorptio…			-0.304879	-0.213731		-0.0634789	0.00102576	-0.0106784		0.321309	0.201109	0.0693242					225.011	94.2661	84.0229	0.462527	7.95366	20.6487	0.000717217	0.0345687	0.00026378	0.0439369	0.23887	0.944911	0.917607	0.000400878	0.00131336		198.349	211.416	234.841	245.671	243.669	307.235	282.515	257.677
ENSG00000278050	RF01956	misc_RNA						0.610958	0.353026		-0.0489733	-0.0241805	-0.150573		-0.417331	-0.0451311	-0.277795					224.67	83.3363	0.564623	-0.714506	6.52093	23.4572	0.000432884	0.0294839	2.10021e-05	0.0956344	0.23887	-0.793725	-0.86291	0.0186875	0.00579701		137.491	114.654	86.2849	87.8152	80.2814	66.3911	86.5203	73.3363
ENSG00000117614	SYF2	PC	SYF2 pre-mRNA splicing factor	This gene encodes a nuclear protein that interacts with cyclin D-type binding-protein 1, which is thought to be a cell cycle regulator at the G1/S transition. Alternate transcriptional splice variants, encoding different isoforms, have been characterized. [provided by RefSeq, Jul 2008].	hsa03040 (Spliceosome), GO:0000398 (mRNA splicing, via spliceosome), GO:0001701 (in utero embryonic development), GO:0007095 (mitotic G2 DNA damage checkpoint), GO:0007369 (gastrulation), GO:0008284 (positive regulation of cell proliferation), GO:0048568 (embryonic organ development), GO:0000974 (Prp19 complex), GO:0005634 (nucleus), GO:0005654 (nucleoplasm), GO:0016607 (nuclear speck), GO:007101…			0.723601	0.761383		-0.10729	-0.199552	-0.222416		-0.617632	-0.293269	-0.0448245					224.1	68.5251	34.3979	-1.04156	5.44572	25.1718	0.000324603	0.0261094	3.60816e-06	0.119433	0.23887	-0.718132	-0.85544	0.0448173	0.0067573		68.9808	70.8642	37.9041	35.4321	34.8436	26.0149	33.0778	39.6699
ENSG00000131238	PPT1	PC	palmitoyl-protein thioesterase 1	The protein encoded by this gene is a small glycoprotein involved in the catabolism of lipid-modified proteins during lysosomal degradation. The encoded enzyme removes thioester-linked fatty acyl groups such as palmitate from cysteine residues. Defects in this gene are a cause of infantile neuronal ceroid lipofuscinosis 1 (CLN1, or INCL) and neuronal ceroid lipofuscinosis 4 (CLN4). Two transcript…	hsa00062 (Fatty acid elongation), hsa01100 (Metabolic pathways), hsa01212 (Fatty acid metabolism), hsa04142 (Lysosome), GO:0002084 (protein depalmitoylation), GO:0006898 (receptor-mediated endocytosis), GO:0006907 (pinocytosis), GO:0007042 (lysosomal lumen acidification), GO:0007269 (neurotransmitter secretion), GO:0007399 (nervous system development), GO:0007420 (brain development), GO:0007601 (…			1.31953	1.06768		-0.46768	-0.441133	-0.282264		-0.488439	-0.278644	-0.429043					224.069	88.0028	26.6784	-1.53547	7.00695	29.9869	0.000154971	0.0194798	1.22258e-07	0.133469	0.23887	-0.566947	-0.82164	0.1428	0.0123553		282.398	236.842	80.3991	81.9294	91.6997	79.222	91.9352	82.6357
ENSG00000272851	AC096772.1	As						0.712839	0.757237		-0.171808	-0.257555	0.127803		-0.702444	-0.117351	-0.348721					224.012	15.0318	5.21394	-1.49142	2.46795	23.3552	0.000440563	0.0294839	4.12471e-06	0.0956344	0.23887	-0.793725	-0.889712	0.0186875	0.00308243		9.29946	9.65261	4.12001	3.76687	5.53259	2.23658	4.35544	3.41373
ENSG00000269897	COMMD3-BMI1	PC	COMMD3-BMI1 readthrough	This locus represents naturally occurring read-through transcription between the neighboring COMM domain-containing protein 3 and polycomb complex protein BMI-1 genes on chromosome 10. The read-through transcript produces a fusion protein that shares sequence identity with each individual gene product. [provided by RefSeq, Feb 2011]. Sequence Note: This RefSeq record was created from transcript a…	hsa04550 (Signaling pathways regulating pluripotency of stem cells), hsa05202 (Transcriptional misregulation in cancer), hsa05206 (MicroRNAs in cancer)			0.730745	0.92925		-0.134909	-0.259927	-0.310555		-0.495867	-0.205016	-0.253721					223.387	62.0413	9.5633	-1.15849	5.04907	27.2075	0.000234731	0.0221456	1.35872e-06	0.133469	0.23887	-0.64254	-0.842328	0.085764	0.00867721		52.2653	60.2699	27.7807	25.3087	24.3669	21.1886	26.3681	25.4264
ENSG00000083168	KAT6A	PC	lysine acetyltransferase 6A		hsa04550 (Signaling pathways regulating pluripotency of stem cells), GO:0006323 (DNA packaging), GO:0006334 (nucleosome assembly), GO:0006351 (transcription, DNA-templated), GO:0006473 (protein acetylation), GO:0016573 (histone acetylation), GO:0030099 (myeloid cell differentiation), GO:0043966 (histone H3 acetylation), GO:0045892 (negative regulation of transcription, DNA-templated), GO:0045893 …			-0.298082	-0.779691		-0.259603	-0.132475	0.0774706		0.492545	0.777967	0.121869					223.268	29.1284	97.4327	1.26657	3.24652	20.4106	0.000750168	0.0345687	3.07531e-05	0.0439369	0.23887	0.944911	0.836836	0.000400878	0.00957409		6.70974	4.23773	6.94517	7.76917	9.29946	13.0663	16.3623	9.65261
ENSG00000255717	SNHG1	PT	small nucleolar RNA host gene 1					0.686922	0.556534		-0.201819	-0.187146	-0.153892		-0.362397	-0.247416	-0.0907869					222.963	95.7392	14.6625	-0.807605	8.29356	24.9825	0.000334852	0.0261344	5.40268e-06	0.119433	0.23887	-0.718132	-0.840978	0.0448173	0.0088925		488.398	446.021	262.857	265.564	271.803	234.959	254.617	284.046
ENSG00000108599	AKAP10	PC	A-kinase anchoring protein 10	This gene encodes a member of the A-kinase anchor protein family. A-kinase anchor proteins bind to the regulatory subunits of protein kinase A (PKA) and confine the holoenzyme to discrete locations within the cell. The encoded protein is localized to mitochondria and interacts with both the type I and type II regulatory subunits of PKA. Polymorphisms in this gene may be associated with increased …	GO:0007165 (signal transduction), GO:0007596 (blood coagulation), GO:0008104 (protein localization), GO:0005739 (mitochondrion), GO:0005829 (cytosol), GO:0005886 (plasma membrane), R-HSA-109582 (Homo sapiens: Hemostasis), R-HSA-983231 (Homo sapiens: Factors involved in megakaryocyte development and platelet production)			-0.807473	-0.663048		-0.0108495	0.30235	0.0322255		0.420545	0.514677	0.211573					222.817	18.7544	25.5845	1.45666	2.68486	21.6539	0.000595589	0.0327602	1.73708e-05	0.0685251	0.23887	0.869318	0.920057	0.00504681	0.00120189		2.47201	2.94287	5.76802	7.65146	6.00345	8.47546	9.18175	7.06288
ENSG00000106105	GARS	PC	glycyl-tRNA synthetase	This gene encodes glycyl-tRNA synthetase, one of the aminoacyl-tRNA synthetases that charge tRNAs with their cognate amino acids. The encoded enzyme is an (alpha)2 dimer which belongs to the class II family of tRNA synthetases. It has been shown to be a target of autoantibodies in the human autoimmune diseases, polymyositis or dermatomyositis. [provided by RefSeq, Jul 2008]. Publication Note: Thi…	hsa00970 (Aminoacyl-tRNA biosynthesis), GO:0006418 (tRNA aminoacylation for protein translation), GO:0006426 (glycyl-tRNA aminoacylation), GO:0015966 (diadenosine tetraphosphate biosynthetic process), GO:0005737 (cytoplasm), GO:0005759 (mitochondrial matrix), GO:0005829 (cytosol), GO:0030141 (secretory granule), GO:0030424 (axon), GO:0070062 (extracellular vesicular exosome), GO:0004081 (bis(5'-n…			0.492964	0.477056		-0.0871131	-0.113252	-0.141042		-0.312138	-0.252822	-0.063654					222.006	90.7904	19.7089	-0.664134	7.33884	24.8234	0.000343759	0.0263301	1.51434e-05	0.119433	0.23887	-0.718132	-0.874203	0.0448173	0.00451904		223.422	220.95	148.791	146.084	143.259	127.014	132.429	151.263
ENSG00000183354	KIAA2026	PC	KIAA2026					0.717825	0.415218		0.152136	-0.065501	-0.0323267		-0.737073	-0.243881	-0.206397					221.681	5.19584	94.1685	-1.49401	1.90772	20.1944	0.00078163	0.035022	1.50263e-05	0.0439369	0.23887	-0.944911	-0.905995	0.000400878	0.0019331		6.70974	5.06173	3.88458	3.06058	3.1783	1.17715	2.47201	2.58972
ENSG00000128789	PSMG2	PC	proteasome assembly chaperone 2		GO:0007094 (mitotic spindle assembly checkpoint), GO:0043066 (negative regulation of apoptotic process), GO:0043248 (proteasome assembly), GO:0000502 (proteasome complex), GO:0005634 (nucleus), GO:0005829 (cytosol), GO:0005515 (protein binding)			0.549253	0.612255		-0.242574	-0.142926	-0.155404		-0.252593	-0.164833	-0.20318					221.377	87.5088	10.3749	-0.75204	6.93799	22.9479	0.000472867	0.0295809	1.71446e-05	0.0956344	0.23887	-0.793725	-0.842146	0.0186875	0.00870599		174.689	182.575	100.057	107.356	106.414	99.3512	105.708	102.883
ENSG00000097033	SH3GLB1	PC	SH3 domain containing GRB2 like, endophilin B1	This gene encodes a SRC homology 3 domain-containing protein. The encoded protein interacts with the proapoptotic member of the Bcl-2 family, Bcl-2-associated X protein (Bax) and may be involved in regulating apoptotic signaling pathways. This protein may also be involved in maintaining mitochondrial morphology. Alternate splicing results in multiple transcript variants. [provided by RefSeq, Sep …	hsa04140 (Autophagy - animal), hsa04144 (Endocytosis), GO:0006914 (autophagy), GO:0006915 (apoptotic process), GO:0010508 (positive regulation of autophagy), GO:0016241 (regulation of macroautophagy), GO:0031647 (regulation of protein stability), GO:0032461 (positive regulation of protein oligomerization), GO:0032465 (regulation of cytokinesis), GO:0032801 (receptor catabolic process), GO:0034198…			0.401092	0.479019		-0.102506	0.0314297	-0.0598012		-0.437918	-0.308484	-0.00283161					220.774	82.7011	96.4535	-0.673483	6.46699	22.855	0.00048062	0.0295809	3.28416e-05	0.0956344	0.23887	-0.793725	-0.891606	0.0186875	0.00293065		114.654	121.128	80.2814	88.286	82.7534	63.2128	69.334	86.1672
ENSG00000183856	IQGAP3	PC	IQ motif containing GTPase activating protein 3		hsa04810 (Regulation of actin cytoskeleton), GO:0000082 (G1/S transition of mitotic cell cycle), GO:0000187 (activation of MAPK activity), GO:0007265 (Ras protein signal transduction), GO:0008361 (regulation of cell size), GO:0010628 (positive regulation of gene expression), GO:0010629 (negative regulation of gene expression), GO:0033601 (positive regulation of mammary gland epithelial cell proli…			0.465598	0.513172		-0.0624677	0.0338774	-0.244904		-0.425328	-0.0926722	-0.187276					220.61	82.9305	91.4865	-0.704016	6.48203	22.8298	0.00048275	0.0295809	2.66833e-05	0.0956344	0.23887	-0.793725	-0.874752	0.0186875	0.00446212		120.893	125.013	83.2243	89.11	73.1008	64.2722	81.4586	76.1614
ENSG00000082397	EPB41L3	PC	erythrocyte membrane protein band 4.1 like 3		GO:0001558 (regulation of cell growth), GO:0002175 (protein localization to paranode region of axon), GO:0006915 (apoptotic process), GO:0007016 (cytoskeletal anchoring at plasma membrane), GO:0008150 (biological_process), GO:0008360 (regulation of cell shape), GO:0030865 (cortical cytoskeleton organization), GO:0030866 (cortical actin cytoskeleton organization), GO:0030913 (paranodal junction as…			0.284585	0.695834		-0.0500666	0.112755	-0.162892		-0.378408	-0.386446	-0.115361					220.23	56.422	53.6833	-0.833279	4.73275	21.2805	0.000637713	0.0333139	5.02975e-05	0.0685251	0.23887	-0.869318	-0.854604	0.00504681	0.00687059		31.5475	42.6127	24.6024	27.7807	22.6012	19.1875	19.0698	23.4252
ENSG00000147526	TACC1	PC	transforming acidic coiled-coil containing protein 1	This locus may represent a breast cancer candidate gene. It is located close to FGFR1 on a region of chromosome 8 that is amplified in some breast cancers. Three transcript variants encoding different isoforms have been found for this gene. [provided by RefSeq, Apr 2009].	GO:0000226 (microtubule cytoskeleton organization), GO:0007049 (cell cycle), GO:0008283 (cell proliferation), GO:0021987 (cerebral cortex development), GO:0051301 (cell division), GO:0005634 (nucleus), GO:0005737 (cytoplasm), GO:0005815 (microtubule organizing center), GO:0015630 (microtubule cytoskeleton), GO:0016020 (membrane), GO:0030496 (midbody), GO:0005515 (protein binding)			-0.273493	-0.289226		0.0897795	-0.0614155	-0.102521		0.235446	0.174809	0.226622					219.377	76.8084	75.6683	0.507575	6.01008	19.8818	0.000829901	0.0361837	0.000372876	0.0439369	0.23887	0.944911	0.961374	0.000400878	0.000139934		52.2653	51.6768	67.8037	60.8585	59.0928	75.2197	72.0414	74.7488
ENSG00000072121	ZFYVE26	PC	zinc finger FYVE-type containing 26	This gene encodes a protein which contains a FYVE zinc finger binding domain. The presence of this domain is thought to target these proteins to membrane lipids through interaction with phospholipids in the membrane. Mutations in this gene are associated with autosomal recessive spastic paraplegia-15. [provided by RefSeq, Oct 2008]. Publication Note: This RefSeq record includes a subset of the pu…	GO:0000724 (double-strand break repair via homologous recombination), GO:0000910 (cytokinesis), GO:0005765 (lysosomal membrane), GO:0005813 (centrosome), GO:0030496 (midbody), GO:0005515 (protein binding), GO:0032266 (phosphatidylinositol-3-phosphate binding), GO:0046872 (metal ion binding)			0.614196	0.215624		0.0256405	0.0985772	0.0781117		-0.205703	-0.543431	-0.283016					218.286	40.12	96.8064	-0.878786	3.83372	19.7344	0.000853878	0.036665	0.000103438	0.0439369	0.23887	-0.944911	-0.898559	0.000400878	0.00241514		21.8949	16.1269	13.8903	14.7143	14.4789	11.536	8.71089	10.8298
ENSG00000025800	KPNA6	PC	karyopherin subunit alpha 6	Nucleocytoplasmic transport, a signal- and energy-dependent process, takes place through nuclear pore complexes embedded in the nuclear envelope. The import of proteins containing a nuclear localization signal (NLS) requires the NLS import receptor, a heterodimer of importin alpha and beta subunits also known as karyopherins. Importin alpha binds the NLS-containing cargo in the cytoplasm and impo…	GO:0006607 (NLS-bearing protein import into nucleus), GO:0045944 (positive regulation of transcription from RNA polymerase II promoter), GO:0060135 (maternal process involved in female pregnancy), GO:0005643 (nuclear pore), GO:0005654 (nucleoplasm), GO:0005829 (cytosol), GO:0016020 (membrane), GO:0005515 (protein binding), GO:0008139 (nuclear localization sequence binding), GO:0008565 (protein tr…			-0.320662	-0.507369		0.133464	-0.0758039	0.0585002		0.337482	0.121237	0.253152					218.178	71.5508	92.5099	0.655399	5.64256	20.9855	0.000673468	0.0339308	0.000111271	0.0685251	0.23887	0.869318	0.920205	0.00504681	0.0011954		38.7281	33.7841	53.7956	46.2619	50.9705	62.2711	53.3248	58.6219
ENSG00000171858	RPS21	PC	ribosomal protein S21	Ribosomes, the organelles that catalyze protein synthesis, consist of a small 40S subunit and a large 60S subunit. Together these subunits are composed of 4 RNA species and approximately 80 structurally distinct proteins. This gene encodes a ribosomal protein that is a component of the 40S subunit. The protein belongs to the S21E family of ribosomal proteins. It is located in the cytoplasm. Alter…	hsa03010 (Ribosome), GO:0000184 (nuclear-transcribed mRNA catabolic process, nonsense-mediated decay), GO:0000447 (endonucleolytic cleavage in ITS1 to separate SSU-rRNA from 5.8S rRNA and LSU-rRNA from tricistronic rRNA transcript (SSU-rRNA, 5.8S rRNA, LSU-rRNA)), GO:0000461 (endonucleolytic cleavage to generate mature 3'-end of SSU-rRNA from (SSU-rRNA, 5.8S rRNA, LSU-rRNA)), GO:0006364 (rRNA pro…			-0.275679	-0.574719		0.0759263	-0.0479151	0.105439		0.466852	0.167984	0.0821124					217.009	97.7682	3.98765	0.647214	9.11595	20.8181	0.00069481	0.0343946	6.51798e-05	0.0685251	0.23887	0.869318	0.852252	0.00504681	0.00719603		448.846	364.445	573.271	525.949	585.16	752.315	611.175	575.743
ENSG00000187325	TAF9B	PC	TATA-box binding protein associated factor 9b	Initiation of transcription by RNA polymerase II requires the activities of more than 70 polypeptides. The protein that coordinates these activities is transcription factor IID (TFIID), which binds to the core promoter to position the polymerase properly, serves as the scaffold for assembly of the remainder of the transcription complex, and acts as a channel for regulatory signals. TFIID is compo…	hsa03022 (Basal transcription factors), hsa05168 (Herpes simplex infection), GO:0000122 (negative regulation of transcription from RNA polymerase II promoter), GO:0006366 (transcription from RNA polymerase II promoter), GO:0006367 (transcription initiation from RNA polymerase II promoter), GO:0006368 (transcription elongation from RNA polymerase II promoter), GO:0016579 (protein deubiquitination)…			-0.593967	-0.200876		-0.130197	-0.219101	0.0530847		0.574239	0.365882	0.150935					215.965	60.8063	63.8024	0.824853	4.97743	20.4483	0.000744833	0.0345687	6.13234e-05	0.0621765	0.23887	0.881917	0.860581	0.00376031	0.00608633		19.4229	26.1327	27.5452	25.7795	31.5475	46.1442	39.6699	33.9018
ENSG00000212907	MT-ND4L	PC	mitochondrially encoded NADH:ubiquinone oxidoreductase core subunit 4L		hsa00190 (Oxidative phosphorylation), hsa01100 (Metabolic pathways), hsa04714 (Thermogenesis), hsa04723 (Retrograde endocannabinoid signaling), hsa05012 (Parkinson disease)			0.468718	1.42261		-0.213804	0.2508	-0.377031		-1.03223	-0.462231	-0.0568372					215.814	98.7826	1.16453	-1.44027	9.89107	22.0953	0.000549936	0.0315542	4.53003e-06	0.0956344	0.23887	-0.793725	-0.75594	0.0186875	0.030016		1160.08	2249.06	722.062	997.161	644.606	408.588	607.526	805.286
ENSG00000170779	CDCA4	PC	cell division cycle associated 4	This gene encodes a protein that belongs to the E2F family of transcription factors. This protein regulates E2F-dependent transcriptional activation and cell proliferation, mainly through the E2F/retinoblastoma protein pathway. It also functions in the regulation of JUN oncogene expression. This protein shows distinctive nuclear-mitotic apparatus distribution, it is involved in spindle organizati…	GO:0005654 (nucleoplasm), GO:0005829 (cytosol), GO:0005886 (plasma membrane), GO:0005515 (protein binding)			-0.329452	-0.603942		0.141506	-0.0189622	0.0801042		0.268621	0.336526	0.125599					215.19	70.7392	73.8862	0.70489	5.58092	20.5585	0.000729503	0.0345687	9.35752e-05	0.0685251	0.23887	0.869318	0.914211	0.00504681	0.00147867		36.727	30.0172	51.6768	46.0264	49.4402	56.6208	59.4459	51.0882
ENSG00000157111	TMEM171	PC	transmembrane protein 171		GO:0016021 (integral component of membrane), GO:0005515 (protein binding)			0.513162	0.265219		0.117651	0.128707	-0.071842		-0.3812	-0.3812	-0.190497					215.002	36.662	47.6842	-0.827276	3.65988	19.2061	0.000946745	0.0389034	0.000158174	0.0423134	0.23887	-0.950586	-0.933534	0.000290566	0.000697978		18.1281	14.9498	13.3018	13.4195	11.4183	8.8286	8.8286	10.3589
ENSG00000248672	LY75-CD302	PC	LY75-CD302 readthrough	This locus represents naturally occurring read-through transcription between the neighboring lymphocyte antigen 75 (LY75) and CD302 molecule (CD302) genes. Alternative splicing results in multiple transcript variants encoding fusion products that share sequence identity with each individual gene product. [provided by RefSeq, Nov 2010].				0.662356	0.723116		-0.262229	-0.176483	0.0538549		-0.591611	-0.204502	-0.204502					214.896	14.7583	98.8796	-1.35854	2.4564	21.8578	0.000573967	0.0322103	1.08909e-05	0.0929678	0.23887	-0.798493	-0.88215	0.0174888	0.00373883		8.94632	9.41718	3.76687	4.12001	5.17945	2.58972	4.0023	4.0023
ENSG00000198918	RPL39	PC	ribosomal protein L39	Ribosomes, the organelles that catalyze protein synthesis, consist of a small 40S subunit and a large 60S subunit. Together these subunits are composed of 4 RNA species and approximately 80 structurally distinct proteins. This gene encodes a ribosomal protein that is a component of the 60S subunit. The protein belongs to the S39E family of ribosomal proteins. It is located in the cytoplasm. In ra…	hsa03010 (Ribosome), GO:0000184 (nuclear-transcribed mRNA catabolic process, nonsense-mediated decay), GO:0002227 (innate immune response in mucosa), GO:0006364 (rRNA processing), GO:0006412 (translation), GO:0006413 (translational initiation), GO:0006614 (SRP-dependent cotranslational protein targeting to membrane), GO:0019083 (viral transcription), GO:0019731 (antibacterial humoral response), G…			1.33368	0.517525		-0.748034	0.191471	0.0734106		-0.606933	-0.323124	-0.437994					214.358	59.933	18.1914	-1.49081	4.92948	23.564	0.000425008	0.0293774	3.40196e-06	0.119433	0.23887	-0.718132	-0.777855	0.0448173	0.0230431		70.7465	39.3167	15.1852	30.959	28.3692	16.9509	21.0709	19.3052
ENSG00000103512	NOMO1	PC	NODAL modulator 1	This gene encodes a protein originally thought to be related to the collagenase gene family. This gene is one of three highly similar genes in a region of duplication located on the p arm of chromosome 16. These three genes encode closely related proteins that may have the same function. The protein encoded by one of these genes has been identified as part of a protein complex that participates i…	GO:0008150 (biological_process), GO:0005575 (cellular_component), GO:0016020 (membrane), GO:0016021 (integral component of membrane), GO:0003674 (molecular_function), GO:0030246 (carbohydrate binding)			0.523389	0.19418		0.133211	-0.0549947	-0.152843		-0.264636	-0.189153	-0.189153					213.93	82.8687	74.292	-0.580906	6.47847	19.063	0.000973905	0.0390112	0.000199971	0.0423134	0.23887	-0.950586	-0.851208	0.000290566	0.00734359		126.661	100.411	96.1729	84.166	78.5157	72.5123	76.5146	76.5146
ENSG00000038382	TRIO	PC	trio Rho guanine nucleotide exchange factor		GO:0006468 (protein phosphorylation), GO:0007185 (transmembrane receptor protein tyrosine phosphatase signaling pathway), GO:0035023 (regulation of Rho protein signal transduction), GO:0043065 (positive regulation of apoptotic process), GO:0043547 (positive regulation of GTPase activity), GO:0051056 (regulation of small GTPase mediated signal transduction), GO:0005829 (cytosol), GO:0004674 (prote…			-0.246084	-0.62849		0.217659	-0.118398	-0.0988221		0.29369	0.214533	0.365913					213.712	69.6718	81.5086	0.736708	5.52577	20.3481	0.000759108	0.034638	7.87629e-05	0.0685251	0.23887	0.869318	0.899517	0.00504681	0.00234913		37.4333	28.2515	52.383	41.0824	41.671	55.3259	52.2653	58.2688
ENSG00000254236	AP003550.1	As						-0.744329	-0.639968		0.181837	0.143358	0.0836437		0.393367	0.326245	0.255847					213.553	18.6838	2.12616	1.30039	2.68155	19.0981	0.000967152	0.0390112	5.79202e-05	0.0439369	0.23887	0.944911	0.939662	0.000400878	0.000524615		2.70744	3.06058	6.94517	6.70974	6.35659	8.35774	7.88688	7.41603
ENSG00000033170	FUT8	PC	fucosyltransferase 8	This gene encodes an enzyme belonging to the family of fucosyltransferases. The product of this gene catalyzes the transfer of fucose from GDP-fucose to N-linked type complex glycopeptides. This enzyme is distinct from other fucosyltransferases which catalyze alpha1-2, alpha1-3, and alpha1-4 fucose addition. The expression of this gene may contribute to the malignancy of cancer cells and to their…	hsa00510 (N-Glycan biosynthesis), hsa00533 (Glycosaminoglycan biosynthesis - keratan sulfate), hsa01100 (Metabolic pathways), hsa05202 (Transcriptional misregulation in cancer), GO:0001701 (in utero embryonic development), GO:0006487 (protein N-linked glycosylation), GO:0006491 (N-glycan processing), GO:0007179 (transforming growth factor beta receptor signaling pathway), GO:0007229 (integrin-med…			0.503674	0.446572		-0.00171772	-0.177009	-0.149658		-0.219035	-0.211945	-0.190882					213.087	56.4838	52.8628	-0.700268	4.73434	19.0359	0.000979156	0.0390835	0.000167894	0.0439369	0.23887	-0.944911	-0.883824	0.000400878	0.00358642		37.4333	35.903	25.7795	22.6012	23.0721	21.8949	22.0126	22.3658
ENSG00000076053	RBM7	PC	RNA binding motif protein 7		GO:0000381 (regulation of alternative mRNA splicing, via spliceosome), GO:0051321 (meiotic cell cycle), GO:0005634 (nucleus), GO:0005654 (nucleoplasm), GO:0003723 (RNA binding), GO:0003727 (single-stranded RNA binding), GO:0005515 (protein binding)			0.665244	0.704135		0.0802431	-0.32697	-0.150075		-0.528627	-0.0691472	-0.374804					212.814	36.362	81.738	-1.1178	3.64129	21.6395	0.000597146	0.0327602	1.88508e-05	0.0956344	0.23887	-0.793725	-0.870195	0.0186875	0.00494938		19.5406	20.1292	12.36	8.8286	10.2412	7.41603	10.9475	8.47546
ENSG00000168288	MMADHC	PC	methylmalonic aciduria and homocystinuria, cblD type	This gene encodes a mitochondrial protein that is involved in an early step of vitamin B12 metabolism. Vitamin B12 (cobalamin) is essential for normal development and survival in humans. Mutations in this gene cause methylmalonic aciduria and homocystinuria type cblD (MMADHC), a disorder of cobalamin metabolism that is characterized by decreased levels of the coenzymes adenosylcobalamin and methy…	GO:0009108 (coenzyme biosynthetic process), GO:0009235 (cobalamin metabolic process), GO:0005737 (cytoplasm), GO:0005739 (mitochondrion), GO:0005829 (cytosol), GO:0005515 (protein binding), R-HSA-1430728 (Homo sapiens: Metabolism), R-HSA-1643685 (Homo sapiens: Disease), R-HSA-196741 (Homo sapiens: Cobalamin (Cbl, vitamin B12) transport and metabolism), R-HSA-196849 (Homo sapiens: Metabolism of wa…			0.964061	1.21249		-0.567291	-0.276675	-0.322079		-0.306785	-0.347935	-0.355783					212.602	83.204	38.6502	-1.38048	6.50559	25.2819	0.00031881	0.0261094	1.31584e-06	0.133469	0.23887	-0.64254	-0.809866	0.085764	0.0148265		159.621	189.992	53.9133	66.3911	64.2722	64.9785	63.0951	62.7419
ENSG00000012048	BRCA1	PC	BRCA1, DNA repair associated	This gene encodes a nuclear phosphoprotein that plays a role in maintaining genomic stability, and it also acts as a tumor suppressor. The encoded protein combines with other tumor suppressors, DNA damage sensors, and signal transducers to form a large multi-subunit protein complex known as the BRCA1-associated genome surveillance complex (BASC). This gene product associates with RNA polymerase I…	hsa01524 (Platinum drug resistance), hsa03440 (Homologous recombination), hsa03460 (Fanconi anemia pathway), hsa04120 (Ubiquitin mediated proteolysis), hsa04151 (PI3K-Akt signaling pathway), hsa05206 (MicroRNAs in cancer), hsa05224 (Breast cancer), GO:0000724 (double-strand break repair via homologous recombination), GO:0000729 (DNA double-strand break processing), GO:0000731 (DNA synthesis invol…			-0.406994	-0.255822		-0.0985337	-0.211197	0.0122517		0.528724	0.166768	0.264804					212.453	55.4428	77.1769	0.728544	4.67989	18.9511	0.000995771	0.0393312	0.000185491	0.0439369	0.23887	0.944911	0.873864	0.000400878	0.00455452		18.2458	20.4824	23.0721	21.1886	25.0732	36.727	28.1338	30.2527
ENSG00000143418	CERS2	PC	ceramide synthase 2	This gene encodes a protein that has sequence similarity to yeast longevity assurance gene 1. Mutation or overexpression of the related gene in yeast has been shown to alter yeast lifespan. The human protein may play a role in the regulation of cell growth. Alternatively spliced transcript variants encoding the same protein have been described. [provided by RefSeq, Jul 2008].	hsa00600 (Sphingolipid metabolism), hsa01100 (Metabolic pathways), hsa04071 (Sphingolipid signaling pathway), GO:0030148 (sphingolipid biosynthetic process), GO:0046513 (ceramide biosynthetic process), GO:0048681 (negative regulation of axon regeneration), GO:1900148 (negative regulation of Schwann cell migration), GO:1905045 (NA), GO:0005783 (endoplasmic reticulum), GO:0005789 (endoplasmic retic…			-0.636365	-0.520865		0.0267082	0.0267082	0.188191		0.205067	0.302375	0.40818					211.61	21.9566	42.2232	1.10585	2.86173	18.7544	0.00103564	0.040483	0.000104043	0.0423134	0.23887	0.950586	0.942351	0.000290566	0.000458505		3.64916	4.12001	6.94517	6.94517	8.0046	8.12231	8.8286	9.65261
ENSG00000146094	DOK3	PC	docking protein 3		GO:0007265 (Ras protein signal transduction), GO:0043312 (neutrophil degranulation), GO:0005886 (plasma membrane), GO:0030667 (secretory granule membrane), GO:0101003 (NA), GO:0005158 (insulin receptor binding), GO:0005515 (protein binding), R-HSA-168249 (Homo sapiens: Innate Immune System), R-HSA-168256 (Homo sapiens: Immune System), R-HSA-6798695 (Homo sapiens: Neutrophil degranulation)			0.574001	0.766653		-0.233396	-0.06346	-0.223411		-0.426055	-0.294801	-0.0995315					211.242	47.8917	33.6127	-0.991966	4.24987	21.4018	0.000623655	0.0331913	2.71703e-05	0.0956344	0.23887	-0.793725	-0.847921	0.0186875	0.00782076		27.663	31.9007	14.9498	17.0686	15.0675	12.8309	14.2435	16.5978
ENSG00000197930	ERO1A	PC	endoplasmic reticulum oxidoreductase 1 alpha		hsa04141 (Protein processing in endoplasmic reticulum), hsa05110 (Vibrio cholerae infection), GO:0000302 (response to reactive oxygen species), GO:0006457 (protein folding), GO:0006464 (cellular protein modification process), GO:0009266 (response to temperature stimulus), GO:0010260 (organ senescence), GO:0019471 (4-hydroxyproline metabolic process), GO:0022417 (protein maturation by protein fold…			0.837993	0.481574		-0.237094	-0.25117	-0.0409427		-0.272544	-0.148803	-0.369012					210.904	57.7717	47.8783	-0.950033	4.81045	21.3508	0.000629524	0.0332107	2.69138e-05	0.0956344	0.23887	-0.793725	-0.821993	0.0186875	0.0122855		49.087	37.9041	22.2481	22.0126	25.7795	21.6595	23.7784	20.1292
ENSG00000169679	BUB1	PC	BUB1 mitotic checkpoint serine/threonine kinase	This gene encodes a serine/threonine-protein kinase that play a central role in mitosis. The encoded protein functions in part by phosphorylating members of the mitotic checkpoint complex and activating the spindle checkpoint. This protein also plays a role in inhibiting the activation of the anaphase promoting complex/cyclosome. This protein may also function in the DNA damage response. Mutation…	hsa04110 (Cell cycle), hsa04114 (Oocyte meiosis), hsa04914 (Progesterone-mediated oocyte maturation), GO:0006468 (protein phosphorylation), GO:0006915 (apoptotic process), GO:0007062 (sister chromatid cohesion), GO:0007063 (regulation of sister chromatid cohesion), GO:0007067 (mitotic nuclear division), GO:0007093 (mitotic cell cycle checkpoint), GO:0007094 (mitotic spindle assembly checkpoint), …			0.538787	1.02063		-0.38359	-0.193642	-0.130663		-0.271436	-0.251591	-0.328501					210.685	72.7241	60.2029	-1.06585	5.72072	22.9663	0.00047135	0.0295809	7.60006e-06	0.119433	0.23887	-0.718132	-0.794118	0.0448173	0.0185868		72.5123	102.059	37.3156	42.8481	44.8493	40.4939	41.0824	38.8458
ENSG00000107554	DNMBP	PC	dynamin binding protein	DNMBP belongs to the DBL (MIM 311030) family of guanine nucleotide exchange factors and plays a role in the regulation of cell junctions (Otani et al., 2006 [PubMed 17015620]).[supplied by OMIM, Mar 2008]. Publication Note: This RefSeq record includes a subset of the publications that are available for this gene. Please see the Gene record to access additional publications.	GO:0007264 (small GTPase mediated signal transduction), GO:0035023 (regulation of Rho protein signal transduction), GO:0043547 (positive regulation of GTPase activity), GO:0005795 (Golgi stack), GO:0005856 (cytoskeleton), GO:0030054 (cell junction), GO:0045202 (synapse), GO:0005089 (Rho guanyl-nucleotide exchange factor activity), GO:0005515 (protein binding)			0.693408	0.349916		-0.0445966	-0.15034	-0.133976		-0.217718	-0.362719	-0.133976					210.516	62.3853	96.6123	-0.777843	5.06818	20.475	0.000741085	0.0345687	6.67588e-05	0.0796494	0.23887	-0.836516	-0.840419	0.00962802	0.00898265		53.5602	41.7887	31.3121	28.9578	29.311	27.5452	24.7201	29.311
ENSG00000269292	AC093503.2	As						0.940613	0.643766		-0.179979	0.063719	-0.354281		-0.814713	-0.19402	-0.105104					210.36	74.4442	1.15571	-1.13226	5.83781	22.9137	0.000475707	0.0295809	6.3703e-06	0.119433	0.23887	-0.718132	-0.836849	0.0448173	0.00957187		103.707	84.0483	46.615	55.5613	41.0824	29.311	46.1442	49.2047
ENSG00000113048	MRPS27	PC	mitochondrial ribosomal protein S27	Mammalian mitochondrial ribosomal proteins are encoded by nuclear genes and help in protein synthesis within the mitochondrion. Mitochondrial ribosomes (mitoribosomes) consist of a small 28S subunit and a large 39S subunit. They have an estimated 75% protein to rRNA composition compared to prokaryotic ribosomes, where this ratio is reversed. Another difference between mammalian mitoribosomes and …	GO:0070125 (mitochondrial translational elongation), GO:0070126 (mitochondrial translational termination), GO:0005739 (mitochondrion), GO:0005743 (mitochondrial inner membrane), GO:0005840 (ribosome), GO:0005515 (protein binding), R-HSA-1852241 (Homo sapiens: Organelle biogenesis and maintenance), R-HSA-5368286 (Homo sapiens: Mitochondrial translation initiation), R-HSA-5368287 (Homo sapiens: Mit…			0.373003	0.446634		-0.132717	-0.113912	-0.0629273		-0.128517	-0.210487	-0.171078					209.916	82.6217	32.4217	-0.561856	6.46074	19.8108	0.000841344	0.0362642	0.000169641	0.0685251	0.23887	-0.869318	-0.875695	0.00504681	0.00436527		112.653	118.656	78.7511	79.8106	82.7534	78.9866	74.5134	76.6323
ENSG00000119685	TTLL5	PC	tubulin tyrosine ligase like 5	This gene encodes a member of the tubulin tyrosine ligase like protein family. This protein interacts with two glucocorticoid receptor coactivators, transcriptional intermediary factor 2 and steroid receptor coactivator 1. This protein may function as a coregulator of glucocorticoid receptor mediated gene induction and repression. This protein may also function as an alpha tubulin polyglutamylase…	GO:0006351 (transcription, DNA-templated), GO:0007288 (sperm axoneme assembly), GO:0009566 (fertilization), GO:0018095 (protein polyglutamylation), GO:0060041 (retina development in camera-type eye), GO:0005634 (nucleus), GO:0005813 (centrosome), GO:0005829 (cytosol), GO:0005874 (microtubule), GO:0005886 (plasma membrane), GO:0005929 (cilium), GO:0005524 (ATP binding), GO:0016874 (ligase activity)			0.357408	0.271317		0.0442402	-0.00580238	0.00546916		-0.272247	-0.251973	-0.148413					209.418	58.398	49.6956	-0.570952	4.84336	18.5474	0.00107966	0.0412265	0.000467658	0.0439369	0.23887	-0.944911	-0.974006	0.000400878	4.3057e-05		36.6093	34.3727	29.0755	28.0161	28.2515	22.9544	23.3075	25.1909
ENSG00000127125	PPCS	PC	phosphopantothenoylcysteine synthetase	Biosynthesis of coenzyme A (CoA) from pantothenic acid (vitamin B5) is an essential universal pathway in prokaryotes and eukaryotes. PPCS (EC 6.3.2.5), one of the last enzymes in this pathway, converts phosphopantothenate to phosphopantothenoylcysteine (Daugherty et al., 2002 [PubMed 11923312]).[supplied by OMIM, Mar 2008].	hsa00770 (Pantothenate and CoA biosynthesis), hsa01100 (Metabolic pathways), GO:0009108 (coenzyme biosynthetic process), GO:0015937 (coenzyme A biosynthetic process), GO:0005829 (cytosol), GO:0070062 (extracellular vesicular exosome), GO:0004632 (phosphopantothenate--cysteine ligase activity), R-HSA-1430728 (Homo sapiens: Metabolism), R-HSA-196783 (Homo sapiens: Coenzyme A biosynthesis), R-HSA-19…			1.19832	1.17323		-0.465325	-0.337769	-0.429404		-0.533597	-0.205314	-0.400138					209.324	67.9076	22.7966	-1.55597	5.40422	27.1093	0.000238335	0.0221456	5.88317e-07	0.133469	0.23887	-0.566947	-0.822634	0.1428	0.0121595		86.7557	85.2254	26.0149	28.6047	26.7212	24.7201	31.5475	27.3098
ENSG00000131981	LGALS3	PC	galectin 3	This gene encodes a member of the galectin family of carbohydrate binding proteins. Members of this protein family have an affinity for beta-galactosides. The encoded protein is characterized by an N-terminal proline-rich tandem repeat domain and a single C-terminal carbohydrate recognition domain. This protein can self-associate through the N-terminal domain allowing it to bind to multivalent sa…	GO:0002548 (monocyte chemotaxis), GO:0006397 (mRNA processing), GO:0008380 (RNA splicing), GO:0030593 (neutrophil chemotaxis), GO:0030855 (epithelial cell differentiation), GO:0042129 (regulation of T cell proliferation), GO:0043312 (neutrophil degranulation), GO:0045087 (innate immune response), GO:0045806 (negative regulation of endocytosis), GO:0048245 (eosinophil chemotaxis), GO:0048246 (macr…			0.283182	0.419527		0.050964	0.115487	0.062912		-0.630128	-0.207883	-0.0940606					209.272	73.2269	14.3185	-0.676869	5.75572	18.528	0.0010839	0.0412265	0.00015745	0.0439369	0.23887	-0.944911	-0.909153	0.000400878	0.00174904		64.5077	71.0997	54.6196	57.2093	55.0905	33.3133	45.3202	49.2047
ENSG00000277985	SNORA67	snoRNA	small nucleolar RNA, H/ACA box 67					-0.290024	-0.66448		-0.0269565	-0.290024	0.104303		0.558062	0.41366	0.19546					208.939	26.579	0.732245	1.08907	3.11304	18.8742	0.00101116	0.0396627	7.68055e-05	0.0513353	0.23887	0.9189	0.892719	0.00125373	0.0028438		6.23888	4.35544	7.88688	6.23888	8.8286	12.8309	11.4183	9.53489
ENSG00000148834	GSTO1	PC	glutathione S-transferase omega 1	The protein encoded by this gene is an omega class glutathione S-transferase (GST) with glutathione-dependent thiol transferase and dehydroascorbate reductase activities. GSTs are involved in the metabolism of xenobiotics and carcinogens. The encoded protein acts as a homodimer and is found in the cytoplasm. Three transcript variants encoding different isoforms have been found for this gene. [pro…	hsa00480 (Glutathione metabolism), hsa00980 (Metabolism of xenobiotics by cytochrome P450), hsa00982 (Drug metabolism - cytochrome P450), hsa00983 (Drug metabolism - other enzymes), hsa01524 (Platinum drug resistance), hsa05200 (Pathways in cancer), hsa05204 (Chemical carcinogenesis), hsa05225 (Hepatocellular carcinoma), hsa05418 (Fluid shear stress and atherosclerosis), GO:0010880 (regulation of…			-0.200518	-0.318683		0.074143	-0.0893564	0.0102229		0.231405	0.0896901	0.203096					208.697	95.0512	13.9038	0.431023	8.12419	18.4518	0.00110071	0.0413168	0.000590572	0.0439369	0.23887	0.944911	0.930385	0.000400878	0.000800011		240.491	221.421	291.344	259.914	278.631	325.128	294.522	318.771
ENSG00000174684	B4GAT1	PC	beta-1,4-glucuronyltransferase 1	This gene encodes a member of the beta-1,3-N-acetylglucosaminyltransferase family. This enzyme is a type II transmembrane protein. It is essential for the synthesis of poly-N-acetyllactosamine, a determinant for the blood group i antigen. [provided by RefSeq, Jul 2008].	hsa00515 (Mannose type O-glycan biosynthesis), hsa01100 (Metabolic pathways), GO:0006493 (protein O-linked glycosylation), GO:0007411 (axon guidance), GO:0018146 (keratan sulfate biosynthetic process), GO:0030311 (poly-N-acetyllactosamine biosynthetic process), GO:0035269 (protein O-linked mannosylation), GO:0000139 (Golgi membrane), GO:0005794 (Golgi apparatus), GO:0030173 (integral component of…			-0.188267	-0.341143		-0.0500487	-0.106348	0.0629616		0.300801	0.202561	0.119482					208.329	84.3155	75.3948	0.482527	6.61294	18.4031	0.00111163	0.0414133	0.000509743	0.0439369	0.23887	0.944911	0.924415	0.000400878	0.00101928		84.6369	75.926	93.3478	89.6986	101.117	119.598	111.594	105.237
ENSG00000159128	IFNGR2	PC	interferon gamma receptor 2	This gene (IFNGR2) encodes the non-ligand-binding beta chain of the gamma interferon receptor. Human interferon-gamma receptor is a heterodimer of IFNGR1 and IFNGR2. Defects in IFNGR2 are a cause of mendelian susceptibility to mycobacterial disease (MSMD), also known as familial disseminated atypical mycobacterial infection. MSMD is a genetically heterogeneous disease with autosomal recessive, au…	hsa04060 (Cytokine-cytokine receptor interaction), hsa04066 (HIF-1 signaling pathway), hsa04217 (Necroptosis), hsa04380 (Osteoclast differentiation), hsa04630 (JAK-STAT signaling pathway), hsa04650 (Natural killer cell mediated cytotoxicity), hsa04658 (Th1 and Th2 cell differentiation), hsa04659 (Th17 cell differentiation), hsa05132 (Salmonella infection), hsa05140 (Leishmaniasis), hsa05142 (Chag…			-0.317844	-0.638871		0.0972023	-0.010556	0.0696159		0.430024	0.328937	0.0414918					208.054	74.6471	46.7931	0.74553	5.85074	20.9222	0.000681452	0.0339453	6.15742e-05	0.0956344	0.23887	0.793725	0.882629	0.0186875	0.00369476		44.6139	35.3144	60.1522	55.6791	58.9751	76.2791	70.982	57.7979
ENSG00000101003	GINS1	PC	GINS complex subunit 1	The yeast heterotetrameric GINS complex is made up of Sld5 (GINS4; MIM 610611), Psf1, Psf2 (GINS2; MIM 610609), and Psf3 (GINS3; MIM 610610). The formation of the GINS complex is essential for the initiation of DNA replication in yeast and Xenopus egg extracts (Ueno et al., 2005 [PubMed 16287864]).[supplied by OMIM, Mar 2008].	GO:0001833 (inner cell mass cell proliferation), GO:0006271 (DNA strand elongation involved in DNA replication), GO:0032508 (DNA duplex unwinding), GO:1902983 (DNA strand elongation involved in mitotic DNA replication), GO:0000811 (GINS complex), GO:0005634 (nucleus), GO:0005654 (nucleoplasm), GO:0005737 (cytoplasm), GO:0043138 (3'-5' DNA helicase activity), R-HSA-1640170 (Homo sapiens: Cell Cycl…			-0.189853	-0.548566		-0.0248573	-0.143817	0.0992107		0.482678	0.205983	0.119221					207.738	80.7075	35.8271	0.649254	6.29383	18.3248	0.00112944	0.0414133	0.00018634	0.0439369	0.23887	0.944911	0.852421	0.000400878	0.00717241		66.9797	51.7945	75.3374	69.2162	82.2826	107.944	88.7569	83.4597
ENSG00000188549	CCDC9B	PC	coiled-coil domain containing 9B		GO:0003723 (RNA binding)			-0.500578	-0.302382		0.0272812	0.0942404	0.102396		0.145656	0.11535	0.318036					207.399	84.1214	82.6731	0.57579	6.59811	18.2802	0.00113975	0.0414133	0.000289923	0.0439369	0.23887	0.944911	0.894731	0.000400878	0.00269094		66.7442	76.8677	97.1146	101.823	102.412	105.59	103.354	119.245
ENSG00000261872	AC002558.2	As						0.569716	1.60274		-0.365387	-0.0952266	-0.204878		-0.86806	-0.645583	0.00667647					207.378	8.00106	8.51345	-2.50174	2.07827	22.4322	0.000517843	0.0307344	4.67037e-06	0.119433	0.23887	-0.718132	-0.738723	0.0448173	0.0363095		5.65031	13.6549	2.00115	2.82515	2.47201	0.824003	1.29486	3.1783
ENSG00000178449	COX14	PC	COX14, cytochrome c oxidase assembly factor	This gene encodes a small single-pass transmembrane protein that localizes to mitochondria. This protein may play a role in coordinating the early steps of cytochrome c oxidase (COX; also known as complex IV) subunit assembly and, in particular, the synthesis and assembly of the COX I subunit of the holoenzyme. Mutations in this gene have been associated with mitochondrial complex IV deficiency. …	hsa04714 (Thermogenesis), GO:0033617 (mitochondrial respiratory chain complex IV assembly), GO:0005739 (mitochondrion), GO:0016021 (integral component of membrane), GO:0031966 (mitochondrial membrane), R-HSA-1428517 (Homo sapiens: The citric acid (TCA) cycle and respiratory electron transport), R-HSA-1430728 (Homo sapiens: Metabolism), R-HSA-163200 (Homo sapiens: Respiratory electron transport, A…			-0.165647	-0.359608		-0.0360992	-0.158771	-0.0360992		0.330902	0.350311	0.0750114					207.295	81.5984	8.60168	0.541738	6.36148	18.1845	0.00116221	0.0418247	0.000357535	0.0423134	0.23887	0.950586	0.879126	0.000290566	0.00402451		71.9237	62.6242	78.8688	72.2768	78.8688	102.294	103.707	85.3432
ENSG00000198689	SLC9A6	PC	solute carrier family 9 member A6	This gene encodes a sodium-hydrogen exchanger that is amember of the solute carrier family 9. The encoded protein localizes to early and recycling endosomes and may be involved in regulating endosomal pH and volume. Defects in this gene are associated with X-linked syndromic mental retardation, Christianson type. Alternate splicing results in multiple transcript variants.[provided by RefSeq, Apr …	hsa04260 (Cardiac muscle contraction), GO:0006810 (transport), GO:0006811 (ion transport), GO:0031547 (brain-derived neurotrophic factor receptor signaling pathway), GO:0048675 (axon extension), GO:0048812 (neuron projection morphogenesis), GO:0050808 (synapse organization), GO:0051386 (regulation of neurotrophin TRK receptor signaling pathway), GO:0051453 (regulation of intracellular pH), GO:006…			0.758308	0.467379		-0.229321	0.122203	-0.110003		-0.279956	-0.13309	-0.59552					207.146	19.2661	93.6127	-1.21	2.7175	19.4215	0.00090751	0.0381421	4.29685e-05	0.0685251	0.23887	-0.869318	-0.87154	0.00504681	0.00480213		11.536	9.06403	4.8263	6.70974	5.41488	4.59087	5.29716	3.29601
ENSG00000150753	CCT5	PC	chaperonin containing TCP1 subunit 5	The protein encoded by this gene is a molecular chaperone that is a member of the chaperonin containing TCP1 complex (CCT), also known as the TCP1 ring complex (TRiC). This complex consists of two identical stacked rings, each containing eight different proteins. Unfolded polypeptides enter the central cavity of the complex and are folded in an ATP-dependent manner. The complex folds various prot…	GO:0006457 (protein folding), GO:0006458 ('de novo' protein folding), GO:0007339 (binding of sperm to zona pellucida), GO:0009615 (response to virus), GO:0032212 (positive regulation of telomere maintenance via telomerase), GO:0050821 (protein stabilization), GO:0061077 (chaperone-mediated protein folding), GO:1901998 (toxin transport), GO:1904851 (NA), GO:1904871 (NA), GO:1904874 (NA), GO:000219…			0.264341	0.33154		-0.0180742	-0.107017	-0.0568552		-0.151142	-0.140866	-0.121925					206.993	97.7152	35.8447	-0.417369	9.05731	18.2265	0.0011523	0.041733	0.000584379	0.0439369	0.23887	-0.944911	-0.901471	0.000400878	0.00221808		634.953	665.323	521.712	490.399	507.821	475.567	478.981	485.338
ENSG00000113621	TXNDC15	PC	thioredoxin domain containing 15		GO:0045454 (cell redox homeostasis), GO:0005623 (cell), GO:0016021 (integral component of membrane)			-0.273358	-0.461576		0.0423488	-0.273358	3.56166e-05		0.328834	0.45949	0.177584					206.172	46.9831	46.3873	0.779919	4.20454	18.5012	0.00108977	0.0412265	0.000200501	0.0513353	0.23887	0.9189	0.902095	0.00125373	0.00217725		14.3612	12.36	18.3635	14.3612	17.7749	22.8367	25.1909	20.3646
ENSG00000185475	TMEM179B	PC	transmembrane protein 179B		GO:0043312 (neutrophil degranulation), GO:0005730 (nucleolus), GO:0005886 (plasma membrane), GO:0016021 (integral component of membrane), GO:0016607 (nuclear speck), GO:0030667 (secretory granule membrane), GO:0035577 (azurophil granule membrane), GO:0101003 (NA), R-HSA-168249 (Homo sapiens: Innate Immune System), R-HSA-168256 (Homo sapiens: Immune System), R-HSA-6798695 (Homo sapiens: Neutrophil…			0.470248	0.344029		-0.0346525	-0.0133731	-0.15999		-0.354979	-0.155321	-0.0959607					206.145	81.2721	12.2188	-0.596865	6.3349	20.6366	0.00071886	0.0345687	0.000110344	0.0956344	0.23887	-0.793725	-0.883883	0.0186875	0.00358115		110.416	100.999	77.2208	78.398	70.6288	61.4471	70.8642	73.9248
ENSG00000141429	GALNT1	PC	polypeptide N-acetylgalactosaminyltransferase 1	This gene encodes a member of the UDP-N-acetyl-alpha-D-galactosamine:polypeptide N-acetylgalactosaminyltransferase (GalNAc-T) family of enzymes. GalNAc-Ts initiate mucin-type O-linked glycosylation in the Golgi apparatus by catalyzing the transfer of GalNAc to serine and threonine residues on target proteins. They are characterized by an N-terminal transmembrane domain, a stem region, a lumenal c…	hsa00512 (Mucin type O-glycan biosynthesis), hsa01100 (Metabolic pathways), GO:0006493 (protein O-linked glycosylation), GO:0016266 (O-glycan processing), GO:0018242 (protein O-linked glycosylation via serine), GO:0018243 (protein O-linked glycosylation via threonine), GO:0000139 (Golgi membrane), GO:0005576 (extracellular region), GO:0005789 (endoplasmic reticulum membrane), GO:0005794 (Golgi ap…			0.471744	0.726678		-0.203923	-0.184686	-0.146965		-0.223419	-0.278435	-0.160995					205.426	66.5138	61.1028	-0.818372	5.3217	20.5293	0.000733522	0.0345687	4.74513e-05	0.0956344	0.23887	-0.793725	-0.827882	0.0186875	0.0111585		54.031	64.8608	33.0778	33.5487	34.4904	32.607	31.3121	34.1373
ENSG00000183876	ARSI	PC	arylsulfatase family member I	Sulfatases (EC 3.1.5.6), such as ARSI, hydrolyze sulfate esters from sulfated steroids, carbohydrates, proteoglycans, and glycolipids. They are involved in hormone biosynthesis, modulation of cell signaling, and degradation of macromolecules (Sardiello et al., 2005 [PubMed 16174644]).[supplied by OMIM, Mar 2008].	GO:0006687 (glycosphingolipid metabolic process), GO:0043687 (post-translational protein modification), GO:0005576 (extracellular region), GO:0005788 (endoplasmic reticulum lumen), GO:0004065 (arylsulfatase activity), GO:0005515 (protein binding), GO:0046872 (metal ion binding), R-HSA-1430728 (Homo sapiens: Metabolism), R-HSA-163841 (Homo sapiens: Gamma carboxylation, hypusine formation and aryls…			-0.624561	-0.342145		0.0547643	-0.0925183	0.188394		0.166026	0.375486	0.274554					205.327	55.5134	62.479	0.782745	4.68403	19.1671	0.000954052	0.0389034	0.000140055	0.0685251	0.23887	0.869318	0.913208	0.00504681	0.00152991		15.4206	19.1875	25.8972	23.1898	28.6047	28.1338	32.8424	30.4881
ENSG00000196284	SUPT3H	PC	SPT3 homolog, SAGA and STAGA complex component		hsa05202 (Transcriptional misregulation in cancer), GO:0006355 (regulation of transcription, DNA-templated), GO:0006357 (regulation of transcription from RNA polymerase II promoter), GO:0006366 (transcription from RNA polymerase II promoter), GO:0016578 (histone deubiquitination), GO:0043966 (histone H3 acetylation), GO:0045893 (positive regulation of transcription, DNA-templated), GO:0005634 (nu…			0.593937	0.78464		0.220077	-0.285897	-0.201817		-0.406216	-0.607896	-0.0968287					205.283	16.2668	39.2325	-1.39383	2.53542	20.5081	0.000736469	0.0345687	1.96646e-05	0.0956344	0.23887	-0.793725	-0.871157	0.0186875	0.00484371		8.8286	10.3589	6.35659	3.88458	4.23773	3.41373	2.70744	4.70859
ENSG00000154447	SH3RF1	PC	SH3 domain containing ring finger 1	This gene encodes a protein containing an N-terminus RING-finger, four SH3 domains, and a region implicated in binding of the Rho GTPase Rac. Via the RING-finger, the encoded protein has been shown to function as an ubiquitin-protein ligase involved in protein sorting at the trans-Golgi network. The encoded protein may also act as a scaffold for the c-Jun N-terminal kinase signaling pathway, faci…	GO:0006915 (apoptotic process), GO:0016567 (protein ubiquitination), GO:0043066 (negative regulation of apoptotic process), GO:0043154 (negative regulation of cysteine-type endopeptidase activity involved in apoptotic process), GO:0046328 (regulation of JNK cascade), GO:2001237 (negative regulation of extrinsic apoptotic signaling pathway), GO:0005794 (Golgi apparatus), GO:0005829 (cytosol), GO:0…			-0.653868	-0.260475		-0.165308	-0.0616749	0.0874823		0.537549	0.378182	0.138113					205.177	33.301	73.4539	0.963824	3.46026	17.9872	0.00121019	0.0424729	0.000143945	0.0439369	0.23887	0.944911	0.889042	0.000400878	0.0031373		5.88573	8.35774	9.06403	9.88803	11.1829	16.0092	14.1258	11.6538
ENSG00000006576	PHTF2	PC	putative homeodomain transcription factor 2		GO:0006351 (transcription, DNA-templated), GO:0006355 (regulation of transcription, DNA-templated), GO:0005634 (nucleus), GO:0005783 (endoplasmic reticulum), GO:0003677 (DNA binding)			0.55815	0.425893		0.160525	0.0299284	-0.0805074		-0.707136	-0.273175	-0.113678					204.766	29.296	88.337	-1.01283	3.25544	17.9333	0.00122371	0.0427419	9.26858e-05	0.0439369	0.23887	-0.944911	-0.919093	0.000400878	0.00124497		14.1258	12.7132	10.2412	9.18175	8.35774	4.70859	7.06288	8.12231
ENSG00000225648	SBDSP1	transcribed_u_Pg	SBDS, ribosome maturation factor pseudogene 1					0.831754	0.609355		-0.113139	-0.0987828	-0.289399		-0.669565	-0.113139	-0.157084					204.274	54.94	12.1659	-1.0512	4.64808	21.018	0.000669418	0.0339308	2.22403e-05	0.105505	0.23887	-0.760469	-0.840584	0.0284811	0.00895591		43.319	36.8447	21.5418	21.7772	18.8344	14.008	21.5418	20.8355
ENSG00000187815	ZFP69	PC	ZFP69 zinc finger protein		GO:0006351 (transcription, DNA-templated), GO:0006355 (regulation of transcription, DNA-templated), GO:0005634 (nucleus), GO:0003677 (DNA binding), GO:0046872 (metal ion binding), R-HSA-212436 (Homo sapiens: Generic Transcription Pathway), R-HSA-74160 (Homo sapiens: Gene Expression)			0.821453	0.320356		-0.240415	0.0523989	-0.102896		-0.276946	-0.240415	-0.333536					204.203	29.9488	68.1429	-1.0227	3.28841	18.3319	0.00112782	0.0414133	0.000117812	0.0537348	0.23887	-0.912563	-0.82156	0.00156352	0.012371		17.6572	11.8892	7.41603	9.53489	8.35774	7.1806	7.41603	6.82745
ENSG00000154511	FAM69A	PC	family with sequence similarity 69 member A	This gene encodes a member of the FAM69 family of cysteine-rich type II transmembrane proteins. These proteins localize to the endoplasmic reticulum but their specific functions are unknown. Alternatively spliced transcript variants encoding multiple isoforms have been observed for this gene. [provided by RefSeq, Nov 2011].	GO:0005789 (endoplasmic reticulum membrane), GO:0016021 (integral component of membrane)			0.371169	0.742062		-0.277496	0.157006	-0.0274574		-0.164993	-0.357688	-0.442602					203.992	4.86062	78.4561	-1.3722	1.89065	18.981	0.000989884	0.0392354	6.11539e-05	0.0685251	0.23887	-0.869318	-0.862401	0.00504681	0.00585944		4.8263	6.82745	2.35429	3.88458	3.1783	2.70744	2.11886	1.88344
ENSG00000113732	ATP6V0E1	PC	ATPase H+ transporting V0 subunit e1	This gene encodes a component of vacuolar ATPase (V-ATPase), a multisubunit enzyme that mediates acidification of eukaryotic intracellular organelles. V-ATPase dependent organelle acidification is necessary for such intracellular processes as protein sorting, zymogen activation, receptor-mediated endocytosis, and synaptic vesicle proton gradient generation. V-ATPase is composed of a cytosolic V1 …	hsa00190 (Oxidative phosphorylation), hsa01100 (Metabolic pathways), hsa04145 (Phagosome), hsa04721 (Synaptic vesicle cycle), hsa04966 (Collecting duct acid secretion), hsa05110 (Vibrio cholerae infection), hsa05120 (Epithelial cell signaling in Helicobacter pylori infection), hsa05165 (Human papillomavirus infection), hsa05323 (Rheumatoid arthritis), GO:0007035 (vacuolar acidification), GO:00082…			0.352833	0.47214		-0.164302	-0.0517577	-0.101286		-0.248436	-0.0795712	-0.179621					203.685	94.9806	15.4918	-0.553292	8.11526	20.2703	0.000770411	0.0349335	0.000114614	0.0956344	0.23887	-0.793725	-0.857662	0.0186875	0.00646179		348.906	379.159	243.199	263.092	254.146	229.308	258.031	240.609
ENSG00000066651	TRMT11	PC	tRNA methyltransferase 11 homolog		GO:0030488 (tRNA methylation), GO:0000049 (tRNA binding), GO:0004809 (tRNA (guanine-N2-)-methyltransferase activity), R-HSA-6782315 (Homo sapiens: tRNA modification in the nucleus and cytosol), R-HSA-72306 (Homo sapiens: tRNA processing), R-HSA-74160 (Homo sapiens: Gene Expression)			0.438122	0.489725		-0.122813	-0.0248645	-0.177493		-0.202476	-0.247266	-0.152935					203.574	59.4037	23.4318	-0.675773	4.89992	18.9228	0.0010014	0.0394161	0.000183014	0.0685251	0.23887	-0.869318	-0.882914	0.00504681	0.00366875		40.023	41.5533	26.4858	28.487	25.4264	24.9555	24.1315	25.8972
ENSG00000105393	BABAM1	PC	BRISC and BRCA1 A complex member 1		hsa03440 (Homologous recombination), GO:0006302 (double-strand break repair), GO:0006303 (double-strand break repair via nonhomologous end joining), GO:0007067 (mitotic nuclear division), GO:0010212 (response to ionizing radiation), GO:0016569 (covalent chromatin modification), GO:0016579 (protein deubiquitination), GO:0031572 (G2 DNA damage checkpoint), GO:0045739 (positive regulation of DNA rep…			-0.418959	-0.43362		0.123072	0.000815557	0.0906505		0.400232	0.221807	0.0160021					203.308	90.3846	16.5152	0.626008	7.29098	20.2144	0.000778662	0.035022	0.00010601	0.0956344	0.23887	0.793725	0.863061	0.0186875	0.00577855		114.419	113.242	167.508	153.735	163.741	203.411	179.515	155.383
ENSG00000114784	EIF1B	PC	eukaryotic translation initiation factor 1B		hsa03013 (RNA transport), GO:0006413 (translational initiation), GO:0006446 (regulation of translational initiation), GO:0005575 (cellular_component), GO:0003723 (RNA binding), GO:0003743 (translation initiation factor activity)			0.63468	0.648972		-0.263671	-0.0953966	-0.231315		-0.182696	-0.293729	-0.216845					202.865	78.361	12.5276	-0.846181	6.11549	23.5817	0.000423725	0.0293774	1.09197e-05	0.133469	0.23887	-0.64254	-0.843689	0.085764	0.00846352		104.413	105.472	55.0905	62.1534	56.3853	58.3865	53.9133	56.9739
ENSG00000099942	CRKL	PC	CRK like proto-oncogene, adaptor protein	This gene encodes a protein kinase containing SH2 and SH3 (src homology) domains which has been shown to activate the RAS and JUN kinase signaling pathways and transform fibroblasts in a RAS-dependent fashion. It is a substrate of the BCR-ABL tyrosine kinase, plays a role in fibroblast transformation by BCR-ABL, and may be oncogenic.[provided by RefSeq, Jan 2009]. Publication Note: This RefSeq re…	hsa04010 (MAPK signaling pathway), hsa04012 (ErbB signaling pathway), hsa04015 (Rap1 signaling pathway), hsa04062 (Chemokine signaling pathway), hsa04510 (Focal adhesion), hsa04666 (Fc gamma R-mediated phagocytosis), hsa04722 (Neurotrophin signaling pathway), hsa04810 (Regulation of actin cytoskeleton), hsa04910 (Insulin signaling pathway), hsa05100 (Bacterial invasion of epithelial cells), hsa05…			-0.265104	-0.357334		-0.0389306	0.0647499	0.0354956		0.231163	0.228815	0.101145					202.025	75.5381	94.689	0.501591	5.91864	17.5742	0.0013184	0.0440736	0.000729333	0.0439369	0.23887	0.944911	0.950022	0.000400878	0.000300501		49.3225	46.1442	58.0333	62.5065	61.2116	70.3934	70.2757	64.1545
ENSG00000203950	RTL8A	PC	retrotransposon Gag like 8A		GO:0005515 (protein binding)			0.547329	0.417574		-0.209841	0.013462	-0.141571		-0.333641	-0.0919198	-0.201392					201.562	83.5303	14.6008	-0.670158	6.53953	21.502	0.000612323	0.0331913	4.88587e-05	0.119433	0.23887	-0.718132	-0.859275	0.0448173	0.00625248		133.488	121.835	78.1626	91.582	82.0471	71.5705	84.99	78.6334
ENSG00000240053	LY6G5B	PC	lymphocyte antigen 6 family member G5B	LY6G5B belongs to a cluster of leukocyte antigen-6 (LY6) genes located in the major histocompatibility complex (MHC) class III region on chromosome 6. Members of the LY6 superfamily typically contain 70 to 80 amino acids, including 8 to 10 cysteines. Most LY6 proteins are attached to the cell surface by a glycosylphosphatidylinositol (GPI) anchor that is directly involved in signal transduction (…	GO:0008150 (biological_process), GO:0005575 (cellular_component), GO:0005576 (extracellular region), GO:0003674 (molecular_function)			0.397468	0.285282		0.00738648	0.0583393	-0.0454319		-0.429839	-0.167858	-0.105347					201.511	63.1087	59.4354	-0.595597	5.11181	17.5071	0.00133702	0.0443533	0.000418433	0.0439369	0.23887	-0.944911	-0.927123	0.000400878	0.000915524		45.2024	41.671	34.0195	35.3144	32.7247	24.6024	29.8995	31.3121
ENSG00000113643	RARS	PC	arginyl-tRNA synthetase	Aminoacyl-tRNA synthetases catalyze the aminoacylation of tRNA by their cognate amino acid. Because of their central role in linking amino acids with nucleotide triplets contained in tRNAs, aminoacyl-tRNA synthetases are thought to be among the first proteins that appeared in evolution. Arginyl-tRNA synthetase belongs to the class-I aminoacyl-tRNA synthetase family. [provided by RefSeq, Jul 2008]…	hsa00970 (Aminoacyl-tRNA biosynthesis), GO:0006418 (tRNA aminoacylation for protein translation), GO:0006420 (arginyl-tRNA aminoacylation), GO:0005634 (nucleus), GO:0005654 (nucleoplasm), GO:0005737 (cytoplasm), GO:0005739 (mitochondrion), GO:0005829 (cytosol), GO:0016020 (membrane), GO:0017101 (aminoacyl-tRNA synthetase multienzyme complex), GO:0070062 (extracellular vesicular exosome), GO:00000…			0.747088	0.539341		-0.258185	-0.202291	-0.158297		-0.250816	-0.16917	-0.247669					201.234	92.5547	16.8328	-0.823408	7.62954	23.3004	0.000444756	0.0294839	9.63956e-06	0.133469	0.23887	-0.64254	-0.823931	0.085764	0.0119071		321.008	277.689	158.915	165.271	170.451	159.739	169.156	160.092
ENSG00000132429	POPDC3	PC	popeye domain containing 3	This gene encodes a member of the POP family of proteins containing three putative transmembrane domains. This gene is expressed in cardiac and skeletal muscle and may play an important role in these tissues during development. Alternatively spliced transcript variants have been found. [provided by RefSeq, Nov 2008].	GO:0008150 (biological_process), GO:0042391 (regulation of membrane potential), GO:0016021 (integral component of membrane), GO:0003674 (molecular_function), GO:0030552 (cAMP binding)			0.492164	0.549424		-0.180112	-0.0468378	-0.00501531		-0.537399	-0.208311	-0.0639123					200.815	48.5092	23.2201	-0.828652	4.28514	18.5402	0.00108122	0.0412265	0.000125515	0.0685251	0.23887	-0.869318	-0.884171	0.00504681	0.00355534		27.0744	28.2515	16.2446	18.0103	18.5989	12.2423	15.8915	17.7749
ENSG00000168874	ATOH8	PC	atonal bHLH transcription factor 8		GO:0001704 (formation of primary germ layer), GO:0001937 (negative regulation of endothelial cell proliferation), GO:0006351 (transcription, DNA-templated), GO:0007399 (nervous system development), GO:0010595 (positive regulation of endothelial cell migration), GO:0030154 (cell differentiation), GO:0035148 (tube formation), GO:0045603 (positive regulation of endothelial cell differentiation), GO:…			-0.249638	-0.423678		-0.0652043	0.0120424	-0.0580084		0.098302	0.378421	0.307764					200.705	53.0346	69.828	0.65485	4.53816	17.4021	0.00136682	0.044911	0.000469048	0.0439369	0.23887	0.944911	0.92438	0.000400878	0.00102069		18.7166	16.3623	21.5418	22.8367	21.6595	24.3669	30.0172	28.487
ENSG00000164405	UQCRQ	PC	ubiquinol-cytochrome c reductase complex III subunit VII	This gene encodes a ubiquinone-binding protein of low molecular mass. This protein is a small core-associated protein and a subunit of ubiquinol-cytochrome c reductase complex III, which is part of the mitochondrial respiratory chain. [provided by RefSeq, Jul 2008].	hsa00190 (Oxidative phosphorylation), hsa01100 (Metabolic pathways), hsa04260 (Cardiac muscle contraction), hsa04714 (Thermogenesis), hsa04932 (Non-alcoholic fatty liver disease (NAFLD)), hsa05010 (Alzheimer disease), hsa05012 (Parkinson disease), hsa05016 (Huntington disease), GO:0006122 (mitochondrial electron transport, ubiquinol to cytochrome c), GO:0021539 (subthalamus development), GO:00215…			-0.231213	-0.3899		0.0540451	-0.0989876	0.061182		0.330833	0.236078	0.0379632					200.617	96.7008	5.87561	0.508502	8.61256	19.8161	0.000840498	0.0362642	0.000208231	0.0956344	0.23887	0.793725	0.883588	0.0186875	0.00360768		329.13	294.64	401.525	360.913	403.526	486.868	455.791	397.052
ENSG00000261915	AC026954.2	PC						0.609816	0.28076		-0.0577838	-0.0736754	-0.190106		-0.195064	-0.227712	-0.146236					200.492	80.6016	83.2378	-0.627415	6.28705	18.4955	0.00109103	0.0412265	0.000176511	0.0685251	0.23887	-0.869318	-0.823988	0.00504681	0.011896		117.479	93.1123	73.2185	72.3945	66.6265	66.3911	64.8608	68.7454
ENSG00000158092	NCK1	PC	NCK adaptor protein 1	The protein encoded by this gene is one of the signaling and transforming proteins containing Src homology 2 and 3 (SH2 and SH3) domains. It is located in the cytoplasm and is an adaptor protein involved in transducing signals from receptor tyrosine kinases to downstream signal recipients such as RAS. Alternatively spliced transcript variants encoding different isoforms have been found. [provided…	hsa04012 (ErbB signaling pathway), hsa04360 (Axon guidance), hsa04660 (T cell receptor signaling pathway), hsa05130 (Pathogenic Escherichia coli infection), GO:0006469 (negative regulation of protein kinase activity), GO:0006930 (substrate-dependent cell migration, cell extension), GO:0007015 (actin filament organization), GO:0007172 (signal complex assembly), GO:0010976 (positive regulation of n…			0.453321	0.744614		-0.037024	-0.0439107	-0.212119		-0.456671	-0.438408	-0.00980124					200.169	54.3402	21.5615	-0.931731	4.61986	21.281	0.000637653	0.0333139	3.13279e-05	0.119433	0.23887	-0.718132	-0.853269	0.0448173	0.00705413		32.7247	40.4939	22.7189	22.6012	19.8938	16.4801	16.7155	23.1898
ENSG00000223812	AC073365.1	lincRNA						-0.104865	-0.652693		-0.0474759	-0.287396	-0.0434627		0.586232	0.310183	0.239478					199.399	68.331	9.31628	0.798908	5.43448	18.1479	0.00117094	0.0419108	0.00011896	0.0621765	0.23887	0.881917	0.843842	0.00376031	0.00843972		38.6104	25.7795	40.2584	33.7841	40.3761	63.5659	52.1476	49.5579
ENSG00000124383	MPHOSPH10	PC	M-phase phosphoprotein 10	This gene encodes a protein that is phosphorylated during mitosis. The protein localizes to the nucleolus during interphase and to the chromosomes during M phase. The protein associates with the U3 small nucleolar ribonucleoprotein 60-80S complexes and may be involved in pre-rRNA processing. [provided by RefSeq, Dec 2010].	hsa03008 (Ribosome biogenesis in eukaryotes), GO:0000375 (RNA splicing, via transesterification reactions), GO:0006364 (rRNA processing), GO:0006396 (RNA processing), GO:0008380 (RNA splicing), GO:0010923 (negative regulation of phosphatase activity), GO:0030490 (maturation of SSU-rRNA), GO:0005654 (nucleoplasm), GO:0005694 (chromosome), GO:0005730 (nucleolus), GO:0005732 (small nucleolar ribonuc…			1.08095	0.488551		0.0357876	-0.284628	-0.37927		-0.307713	-0.37927	-0.254412					199.323	57.0483	49.3075	-1.15842	4.76511	21.9181	0.000567754	0.0321803	1.27397e-05	0.12489	0.23887	-0.684422	-0.784669	0.0611479	0.0211035		55.3259	36.0207	25.7795	20.2469	18.8344	19.8938	18.8344	20.7178
ENSG00000148943	LIN7C	PC	lin-7 homolog C, crumbs cell polarity complex component		GO:0002011 (morphogenesis of an epithelial sheet), GO:0006887 (exocytosis), GO:0007269 (neurotransmitter secretion), GO:0015031 (protein transport), GO:0045199 (maintenance of epithelial cell apical/basal polarity), GO:1903361 (protein localization to basolateral plasma membrane), GO:0005737 (cytoplasm), GO:0005886 (plasma membrane), GO:0005911 (cell-cell junction), GO:0005923 (tight junction), G…			-0.419941	-0.452005		-0.146349	0.0946789	0.127596		0.242247	0.281778	0.271996					199.198	37.2089	97.2386	0.794363	3.68155	17.2061	0.00142452	0.0460066	0.000365719	0.0439369	0.23887	0.944911	0.951188	0.000400878	0.000280212		8.71089	8.47546	10.9475	13.3018	13.6549	14.9498	15.4206	15.3029
ENSG00000183617	MRPL54	PC	mitochondrial ribosomal protein L54	Mammalian mitochondrial ribosomal proteins are encoded by nuclear genes and help in protein synthesis within the mitochondrion. Mitochondrial ribosomes (mitoribosomes) consist of a small 28S subunit and a large 39S subunit. They have an estimated 75% protein to rRNA composition compared to prokaryotic ribosomes, where this ratio is reversed. Another difference between mammalian mitoribosomes and …	GO:0070125 (mitochondrial translational elongation), GO:0070126 (mitochondrial translational termination), GO:0005743 (mitochondrial inner membrane), GO:0005762 (mitochondrial large ribosomal subunit), GO:0003723 (RNA binding), R-HSA-1852241 (Homo sapiens: Organelle biogenesis and maintenance), R-HSA-5368286 (Homo sapiens: Mitochondrial translation initiation), R-HSA-5368287 (Homo sapiens: Mitoch…			-0.427217	-0.449357		0.0540255	-0.0287463	0.23151		0.266644	0.217526	0.135614					198.979	83.6009	4.97574	0.623824	6.54432	19.5749	0.000880745	0.0375343	0.000154463	0.0956344	0.23887	0.793725	0.889671	0.0186875	0.0030858		67.5682	66.5088	95.1135	89.6986	107.827	110.534	106.767	100.764
ENSG00000241990	PRR34-AS1	As	PRR34 antisense RNA 1					-0.23111	-0.582982		-0.178254	-0.209735	0.145769		0.33946	0.554594	0.162258					198.396	45.4305	4.48169	0.861397	4.11058	17.1021	0.0014563	0.0463725	0.000233553	0.0439369	0.23887	0.944911	0.85914	0.000400878	0.00626987		13.7726	10.3589	14.3612	14.008	18.4812	21.4241	25.1909	18.7166
ENSG00000123472	ATPAF1	PC	ATP synthase mitochondrial F1 complex assembly factor 1	This gene encodes an assembly factor for the F(1) component of the mitochondrial ATP synthase. This protein binds specifically to the F1 beta subunit and is thought to prevent this subunit from forming nonproductive homooligomers during enzyme assembly. Alternatively spliced transcript variants have been identified. [provided by RefSeq, Aug 2011].	GO:0033615 (mitochondrial proton-transporting ATP synthase complex assembly), GO:0005739 (mitochondrion), GO:0005515 (protein binding)			0.771174	0.420538		-0.194073	-0.220741	-0.101953		-0.212689	-0.149838	-0.312418					198.343	79.7283	41.6762	-0.805061	6.21572	20.9923	0.000672622	0.0339308	3.24705e-05	0.119433	0.23887	-0.718132	-0.81111	0.0448173	0.014552		123.483	96.4083	62.2711	61.0939	66.5088	61.4471	64.2722	57.2093
ENSG00000232220	AC008440.2	As						0.882109	1.14404		-0.318274	-0.413442	-0.200426		-0.66345	-0.0654841	-0.365073					197.861	38.4704	2.20556	-1.50406	3.75257	22.7221	0.000491973	0.0296649	6.31441e-06	0.133469	0.23887	-0.64254	-0.818258	0.085764	0.0130362		23.4252	28.487	9.06403	8.35774	10.0057	6.70974	11.1829	8.71089
ENSG00000023734	STRAP	PC	serine/threonine kinase receptor associated protein		hsa03013 (RNA transport), GO:0000122 (negative regulation of transcription from RNA polymerase II promoter), GO:0000387 (spliceosomal snRNP assembly), GO:0010633 (negative regulation of epithelial cell migration), GO:0010719 (negative regulation of epithelial to mesenchymal transition), GO:0030277 (maintenance of gastrointestinal epithelium), GO:0030512 (negative regulation of transforming growth…			0.665086	0.581589		-0.277921	-0.188471	-0.169057		-0.19214	-0.230615	-0.188471					196.615	90.8257	31.7512	-0.78311	7.34146	21.4761	0.000615221	0.0331913	2.31202e-05	0.12489	0.23887	-0.684422	-0.824316	0.0611479	0.0118327		249.202	235.076	128.662	137.02	138.903	136.667	133.018	137.02
ENSG00000152061	RABGAP1L	PC	RAB GTPase activating protein 1 like		GO:0006886 (intracellular protein transport), GO:0031338 (regulation of vesicle fusion), GO:0032880 (regulation of protein localization), GO:0090630 (NA), GO:0005634 (nucleus), GO:0005769 (early endosome), GO:0005794 (Golgi apparatus), GO:0005096 (GTPase activator activity), GO:0017137 (Rab GTPase binding)			0.761851	0.133744		-0.0526984	0.111715	0.0893434		-0.451325	-0.325767	-0.266862					196.579	15.1288	68.6193	-1.14053	2.47179	16.8671	0.00153123	0.0475912	0.000234581	0.0439369	0.23887	-0.944911	-0.830638	0.000400878	0.0106544		10.0057	5.76802	4.8263	5.65031	5.53259	3.1783	3.64916	3.88458
ENSG00000141127	PRPSAP2	PC	phosphoribosyl pyrophosphate synthetase associated protein 2	This gene encodes a protein that associates with the enzyme phosphoribosylpyrophosphate synthetase (PRS). PRS catalyzes the formation of phosphoribosylpyrophosphate which is a substrate for synthesis of purine and pyrimidine nucleotides, histidine, tryptophan and NAD. PRS exists as a complex with two catalytic subunits and two associated subunits. This gene encodes a non-catalytic associated subu…	GO:0006139 (nucleobase-containing compound metabolic process), GO:0009116 (nucleoside metabolic process), GO:0009165 (nucleotide biosynthetic process), GO:0043086 (negative regulation of catalytic activity), GO:0060348 (bone development), GO:0002189 (ribose phosphate diphosphokinase complex), GO:0043234 (protein complex), GO:0000287 (magnesium ion binding), GO:0004749 (ribose phosphate diphosphok…			-0.341831	-0.14299		-0.102842	-0.0234061	-0.0637811		0.326361	0.117077	0.231411					196.432	79.1637	21.9674	0.488872	6.18308	16.8481	0.00153746	0.0475912	0.000790748	0.0439369	0.23887	0.944911	0.910851	0.000400878	0.00165495		56.1499	64.7431	66.6265	70.5111	68.51	90.4049	77.9271	84.5192
ENSG00000221914	PPP2R2A	PC	protein phosphatase 2 regulatory subunit Balpha	The product of this gene belongs to the phosphatase 2 regulatory subunit B family. Protein phosphatase 2 is one of the four major Ser/Thr phosphatases, and it is implicated in the negative control of cell growth and division. It consists of a common heteromeric core enzyme, which is composed of a catalytic subunit and a constant regulatory subunit, that associates with a variety of regulatory sub…	hsa03015 (mRNA surveillance pathway), hsa04071 (Sphingolipid signaling pathway), hsa04151 (PI3K-Akt signaling pathway), hsa04152 (AMPK signaling pathway), hsa04261 (Adrenergic signaling in cardiomyocytes), hsa04390 (Hippo signaling pathway), hsa04530 (Tight junction), hsa04728 (Dopaminergic synapse), hsa05142 (Chagas disease (American trypanosomiasis)), hsa05160 (Hepatitis C), hsa05165 (Human pap…			0.460989	0.498044		-0.065371	-0.075543	-0.192441		-0.39833	-0.0892183	-0.138129					196.044	72.3977	21.2086	-0.674068	5.70004	19.1449	0.000958254	0.0389347	0.000126776	0.0956344	0.23887	-0.793725	-0.863712	0.0186875	0.0056994		70.3934	72.2768	48.263	47.9099	44.0253	37.9041	47.439	45.791
ENSG00000196199	MPHOSPH8	PC	M-phase phosphoprotein 8		GO:0006351 (transcription, DNA-templated), GO:0016567 (protein ubiquitination), GO:0044030 (regulation of DNA methylation), GO:0045892 (negative regulation of transcription, DNA-templated), GO:0000151 (ubiquitin ligase complex), GO:0000788 (nuclear nucleosome), GO:0005634 (nucleus), GO:0005720 (nuclear heterochromatin), GO:0005730 (nucleolus), GO:0005737 (cytoplasm), GO:0005829 (cytosol), GO:0005…			-0.154238	-0.401086		-0.0209665	-0.102808	-0.0916237		0.322034	0.190786	0.257902					195.837	60.4799	47.6136	0.576568	4.95981	16.7714	0.00156302	0.0480174	0.000659965	0.0439369	0.23887	0.944911	0.936475	0.000400878	0.00061074		27.1921	22.6012	30.0172	28.2515	28.487	38.6104	35.079	36.8447
ENSG00000168818	STX18	PC	syntaxin 18		hsa04130 (SNARE interactions in vesicular transport), hsa04145 (Phagosome), GO:0006886 (intracellular protein transport), GO:0006890 (retrograde vesicle-mediated transport, Golgi to ER), GO:0061025 (membrane fusion), GO:0090158 (endoplasmic reticulum membrane organization), GO:1902117 (positive regulation of organelle assembly), GO:1902953 (positive regulation of ER to Golgi vesicle-mediated tran…			-0.421552	-0.284808		-0.0712024	0.0854325	0.0248036		0.171851	0.279568	0.215907					195.545	55.2929	40.944	0.607026	4.67409	16.7337	0.00157576	0.0481079	0.00070249	0.0439369	0.23887	0.944911	0.959917	0.000400878	0.000156199		18.1281	20.1292	23.6607	26.6035	25.4264	28.3692	30.7235	29.311
ENSG00000107371	EXOSC3	PC	exosome component 3	This gene encodes a non-catalytic component of the human exosome, a complex with 3_-5_ exoribonuclease activity that plays a role in numerous RNA processing and degradation activities. Related pseudogenes of this gene are found on chromosome 19 and 21. Alternatively spliced transcript variants encoding different isoforms have been described. [provided by RefSeq, Jun 2012].	hsa03018 (RNA degradation), GO:0000467 (exonucleolytic trimming to generate mature 3'-end of 5.8S rRNA from tricistronic rRNA transcript (SSU-rRNA, 5.8S rRNA, LSU-rRNA)), GO:0006364 (rRNA processing), GO:0034427 (nuclear-transcribed mRNA catabolic process, exonucleolytic, 3'-5'), GO:0034475 (U4 snRNA 3'-end processing), GO:0043488 (regulation of mRNA stability), GO:0043928 (exonucleolytic nuclear…			0.492328	0.574401		-0.265323	-0.129169	-0.0630384		-0.286297	-0.113019	-0.209883					195.541	78.1757	14.4685	-0.714482	6.10103	20.5516	0.000730442	0.0345687	5.76747e-05	0.119433	0.23887	-0.718132	-0.846729	0.0448173	0.00799859		94.5249	100.175	55.0905	60.7408	63.6837	54.2665	61.4471	57.3271
ENSG00000243199	AC115223.1	p_Pg						-0.373617	-0.566325		-0.329209	0.0527607	0.118364		0.298973	0.648975	0.150079					195.474	2.14361	16.2064	1.47047	1.71427	16.7247	0.00157885	0.0481079	0.000161769	0.0439369	0.23887	0.944911	0.84391	0.000400878	0.00842923		1.76572	1.29486	1.88344	3.06058	3.29601	4.0023	5.65031	3.41373
ENSG00000203965	EFCAB7	PC	EF-hand calcium binding domain 7		GO:0005929 (cilium), GO:0005509 (calcium ion binding), R-HSA-162582 (Homo sapiens: Signal Transduction), R-HSA-5358351 (Homo sapiens: Signaling by Hedgehog), R-HSA-5632684 (Homo sapiens: Hedgehog 'on' state), R-HSA-5635838 (Homo sapiens: Activation of SMO)			0.676389	0.676389		0.0569219	-0.35123	-0.19366		-0.296772	-0.244295	-0.323744					195.248	18.5427	49.7839	-1.2254	2.67492	20.4143	0.000749645	0.0345687	2.87904e-05	0.116414	0.23887	-0.722446	-0.86909	0.0429448	0.00507235		10.4766	10.4766	6.12116	4.12001	4.8263	4.35544	4.59087	4.23773
ENSG00000156508	EEF1A1	PC	eukaryotic translation elongation factor 1 alpha 1	This gene encodes an isoform of the alpha subunit of the elongation factor-1 complex, which is responsible for the enzymatic delivery of aminoacyl tRNAs to the ribosome. This isoform (alpha 1) is expressed in brain, placenta, lung, liver, kidney, and pancreas, and the other isoform (alpha 2) is expressed in brain, heart and skeletal muscle. This isoform is identified as an autoantigen in 66% of p…	hsa03013 (RNA transport), hsa05134 (Legionellosis), GO:0006351 (transcription, DNA-templated), GO:0006355 (regulation of transcription, DNA-templated), GO:0006414 (translational elongation), GO:0006479 (protein methylation), GO:0043312 (neutrophil degranulation), GO:0071364 (cellular response to epidermal growth factor stimulus), GO:1904714 (NA), GO:0005576 (extracellular region), GO:0005615 (ext…			0.155952	0.279122		0.0149578	-0.00590446	0.0482466		-0.26152	-0.101849	-0.129005					195.213	99.7089	71.1072	-0.380271	11.1471	16.691	0.00159036	0.0481079	0.0013835	0.0439369	0.23887	-0.944911	-0.940035	0.000400878	0.000515114		2511.44	2735.45	2277.43	2244.7	2330.63	1879.9	2100.15	2060.95
ENSG00000109475	RPL34	PC	ribosomal protein L34	Ribosomes, the organelles that catalyze protein synthesis, consist of a small 40S subunit and a large 60S subunit. Together these subunits are composed of 4 RNA species and approximately 80 structurally distinct proteins. This gene encodes a ribosomal protein that is a component of the 60S subunit. The protein belongs to the L34E family of ribosomal proteins. It is located in the cytoplasm. This …	hsa03010 (Ribosome), GO:0000184 (nuclear-transcribed mRNA catabolic process, nonsense-mediated decay), GO:0006364 (rRNA processing), GO:0006412 (translation), GO:0006413 (translational initiation), GO:0006614 (SRP-dependent cotranslational protein targeting to membrane), GO:0019083 (viral transcription), GO:0042254 (ribosome biogenesis), GO:0005739 (mitochondrion), GO:0005829 (cytosol), GO:002262…			-0.132273	-0.323347		0.0150421	-0.13779	-0.0402826		0.32816	0.118936	0.171555					195.181	96.9037	17.0093	0.442742	8.67055	17.575	0.00131817	0.0440736	0.000602235	0.0621765	0.23887	0.881917	0.888362	0.00376031	0.0031936		368.094	322.185	407.881	366.681	392.461	507.233	438.487	454.85
ENSG00000087302	RTRAF	PC	RNA transcription, translation and transport factor		GO:0006351 (transcription, DNA-templated), GO:0006388 (tRNA splicing, via endonucleolytic cleavage and ligation), GO:0016032 (viral process), GO:0045944 (positive regulation of transcription from RNA polymerase II promoter), GO:0050658 (RNA transport), GO:0005634 (nucleus), GO:0005654 (nucleoplasm), GO:0005737 (cytoplasm), GO:0005815 (microtubule organizing center), GO:0005829 (cytosol), GO:00484…			0.72657	0.386061		-0.186401	-0.171539	-0.119052		-0.353098	-0.200837	-0.0817032					195.031	96.198	58.3679	-0.732708	8.4303	20.4717	0.000741548	0.0345687	3.83875e-05	0.119433	0.23887	-0.718132	-0.804882	0.0448173	0.0159592		554.554	437.546	293.58	296.641	307.706	261.327	290.638	315.829
ENSG00000050165	DKK3	PC	dickkopf WNT signaling pathway inhibitor 3	This gene encodes a protein that is a member of the dickkopf family. The secreted protein contains two cysteine rich regions and is involved in embryonic development through its interactions with the Wnt signaling pathway. The expression of this gene is decreased in a variety of cancer cell lines and it may function as a tumor suppressor gene. Alternative splicing results in multiple transcript v…	GO:0009653 (anatomical structure morphogenesis), GO:0016055 (Wnt signaling pathway), GO:0017015 (regulation of transforming growth factor beta receptor signaling pathway), GO:0030325 (adrenal gland development), GO:0032348 (negative regulation of aldosterone biosynthetic process), GO:0045892 (negative regulation of transcription, DNA-templated), GO:0090090 (negative regulation of canonical Wnt si…			0.355132	0.25229		0.143126	-0.0943081	-0.129074		-0.235624	-0.110178	-0.181365					194.922	92.4665	25.9109	-0.471514	7.61142	17.7305	0.00127617	0.0434433	0.000478525	0.0685251	0.23887	-0.869318	-0.883883	0.00504681	0.00358109		247.789	230.603	213.652	180.927	176.572	163.859	178.926	170.215
ENSG00000265401	AC093484.3	As						-0.283656	-0.305554		0.0984095	-0.0125512	0.0364224		0.244083	0.168022	0.0548244					194.792	97.2653	2.99074	0.436527	8.81031	17.7128	0.00128088	0.0434731	0.000661643	0.0685251	0.23887	0.869318	0.909641	0.00504681	0.00172165		365.269	359.736	476.627	441.195	456.498	527.48	500.287	462.383
ENSG00000109911	ELP4	PC	elongator acetyltransferase complex subunit 4	This gene encodes a component of the six subunit elongator complex, a histone acetyltransferase complex that associates directly with RNA polymerase II during transcriptional elongation. The human gene can partially complement sensitivity phenotypes of yeast ELP4 deletion mutants. This gene has also been associated with Rolandic epilepsy. Alternative splicing results in multiple transcript varian…	GO:0006357 (regulation of transcription from RNA polymerase II promoter), GO:0006368 (transcription elongation from RNA polymerase II promoter), GO:0043966 (histone H3 acetylation), GO:0043967 (histone H4 acetylation), GO:0045859 (regulation of protein kinase activity), GO:0000123 (histone acetyltransferase complex), GO:0005654 (nucleoplasm), GO:0005737 (cytoplasm), GO:0008023 (transcription elon…			0.302704	0.484654		0.0581522	-0.0867309	-0.0270206		-0.270707	-0.107196	-0.353855					194.653	43.7456	75.0243	-0.700973	4.02581	16.619	0.0016153	0.0484419	0.000489433	0.0439369	0.23887	-0.944911	-0.919832	0.000400878	0.00121188		19.8938	22.8367	16.4801	14.7143	15.4206	12.7132	14.4789	11.8892
ENSG00000138463	DIRC2	PC	disrupted in renal carcinoma 2	This gene encodes a membrane-bound protein from the major facilitator superfamily of transporters. Disruption of this gene by translocation has been associated with haplo-insufficiency and renal cell carcinomas. Alternatively spliced transcript variants have been described, but their biological validity has not yet been determined. [provided by RefSeq, Jul 2008]. Sequence Note: The RefSeq transcr…	GO:0006810 (transport), GO:0005765 (lysosomal membrane), GO:0016021 (integral component of membrane), GO:0043231 (intracellular membrane-bounded organelle)			0.661467	0.297176		-0.10769	-0.0382636	0.242431		-0.557033	-0.450108	-0.0479794					194.596	44.7248	87.0137	-0.919613	4.07576	17.686	0.00128803	0.0435853	0.000147226	0.0685251	0.23887	-0.869318	-0.859812	0.00504681	0.00618379		26.4858	20.1292	14.7143	15.5383	19.3052	10.2412	11.1829	15.4206
ENSG00000263647	BPTFP1	u_Pg	bromodomain PHD finger transcription factor pseudogene 1					0.373141	0.778032		-0.222118	0.245744	0.0813307		-0.776848	-0.317296	-0.161985					194.469	12.2618	3.47596	-1.40364	2.32276	17.6687	0.00129267	0.0436122	5.78929e-05	0.0685251	0.23887	-0.869318	-0.868366	0.00504681	0.00515404		6.35659	9.06403	3.53144	5.65031	4.8263	1.76572	3.1783	3.76687
ENSG00000167615	LENG8	PC	leukocyte receptor cluster member 8		GO:0005515 (protein binding)			0.147018	0.354106		0.135553	0.122061	0.0946913		-0.491268	-0.216917	-0.145244					194.436	81.0251	80.3529	-0.564736	6.3217	16.5911	0.00162508	0.0485085	0.000498262	0.0439369	0.23887	-0.944911	-0.889629	0.000400878	0.00308918		87.2266	100.999	86.5203	85.6963	84.0483	55.3259	67.3328	70.8642
ENSG00000157426	AASDH	PC	aminoadipate-semialdehyde dehydrogenase		GO:0006631 (fatty acid metabolic process), GO:0019482 (beta-alanine metabolic process), GO:0043041 (amino acid activation for nonribosomal peptide biosynthetic process), GO:0005524 (ATP binding), GO:0016878 (acid-thiol ligase activity)			0.690082	0.318945		-0.15506	0.0208203	0.134495		-0.58811	-0.266112	-0.15506					194.385	15.1288	83.2201	-1.14508	2.47179	17.0249	0.00148041	0.046877	0.000138648	0.0537348	0.23887	-0.912563	-0.876882	0.00156352	0.00424539		9.41718	6.82745	4.35544	5.17945	5.76802	2.70744	3.88458	4.35544
ENSG00000257727	CNPY2	PC	canopy FGF signaling regulator 2		GO:0007167 (enzyme linked receptor protein signaling pathway), GO:0009888 (tissue development), GO:0010629 (negative regulation of gene expression), GO:0010988 (regulation of low-density lipoprotein particle clearance), GO:0045716 (positive regulation of low-density lipoprotein particle receptor biosynthetic process), GO:0005783 (endoplasmic reticulum), GO:0005887 (integral component of plasma me…			-0.751724	-0.566602		0.0751637	0.159779	0.195849		0.437206	0.414426	0.035903					194.294	61.7766	9.92501	0.961133	5.03425	20.3563	0.000757921	0.034638	4.45407e-05	0.119433	0.23887	0.718132	0.87143	0.0448173	0.00481409		17.7749	20.4824	33.0778	35.1967	36.1384	43.0836	42.3773	32.1361
ENSG00000175745	NR2F1	PC	nuclear receptor subfamily 2 group F member 1	The protein encoded by this gene is a nuclear hormone receptor and transcriptional regulator. The encoded protein acts as a homodimer and binds to 5_-AGGTCA-3_ repeats. Defects in this gene are a cause of Bosch-Boonstra optic atrophy syndrome (BBOAS). [provided by RefSeq, Apr 2014]. Sequence Note: This RefSeq record was created from transcript and genomic sequence data to make the sequence consis…	GO:0000122 (negative regulation of transcription from RNA polymerase II promoter), GO:0006367 (transcription initiation from RNA polymerase II promoter), GO:0007165 (signal transduction), GO:0010977 (negative regulation of neuron projection development), GO:0030522 (intracellular receptor signaling pathway), GO:0043401 (steroid hormone mediated signaling pathway), GO:0045944 (positive regulation …			0.347201	0.36738		0.104333	0.096295	-0.168368		-0.321458	-0.197714	-0.227669					194.26	46.7625	49.3869	-0.666146	4.18949	16.5685	0.00163306	0.0485085	0.000564134	0.0439369	0.23887	-0.944911	-0.940202	0.000400878	0.000510868		23.0721	23.4252	19.1875	19.0698	15.5383	13.7726	15.1852	14.8321
ENSG00000138802	SEC24B	PC	SEC24 homolog B, COPII coat complex component	The protein encoded by this gene is a member of the SEC24 subfamily of the SEC23/SEC24 family, which is involved in vesicle trafficking. The encoded protein has similarity to yeast Sec24p component of COPII. COPII is the coat protein complex responsible for vesicle budding from the ER. The role of this gene product is implicated in the shaping of the vesicle, and also in cargo selection and conce…	hsa04141 (Protein processing in endoplasmic reticulum), GO:0001843 (neural tube closure), GO:0002474 (antigen processing and presentation of peptide antigen via MHC class I), GO:0003151 (outflow tract morphogenesis), GO:0006886 (intracellular protein transport), GO:0006888 (ER to Golgi vesicle-mediated transport), GO:0016192 (vesicle-mediated transport), GO:0019886 (antigen processing and present…			0.289285	0.397818		0.231795	0.0836841	0.0574502		-0.251333	-0.540876	-0.267823					194.076	32.904	96.8681	-0.845341	3.43693	16.5448	0.00164148	0.0485085	0.00034821	0.0439369	0.23887	-0.944911	-0.942769	0.000400878	0.000448739		13.0663	14.2435	12.4778	11.0652	10.8298	8.35774	6.47431	8.24003
ENSG00000070367	EXOC5	PC	exocyst complex component 5	The protein encoded by this gene is a component of the exocyst complex, a multiple protein complex essential for targeting exocytic vesicles to specific docking sites on the plasma membrane. Though best characterized in yeast, the component proteins and functions of exocyst complex have been demonstrated to be highly conserved in higher eukaryotes. At least eight components of the exocyst complex…	GO:0006887 (exocytosis), GO:0006892 (post-Golgi vesicle-mediated transport), GO:0006893 (Golgi to plasma membrane transport), GO:0015031 (protein transport), GO:0048278 (vesicle docking), GO:0000145 (exocyst), GO:0005737 (cytoplasm), GO:0005829 (cytosol), GO:0005515 (protein binding), GO:0017160 (Ral GTPase binding), GO:0047485 (protein N-terminus binding), R-HSA-1445148 (Homo sapiens: Translocat…			0.806445	1.22782		-0.236456	-0.307723	-0.382694		-0.634269	-0.253945	-0.219175					194.016	33.2481	88.884	-1.58603	3.4564	24.2202	0.000380164	0.0274493	3.26933e-06	0.133469	0.23887	-0.566947	-0.808988	0.1428	0.0150224		18.1281	24.9555	7.76917	7.29831	6.82745	5.41488	7.65146	7.88688
ENSG00000035403	VCL	PC	vinculin	Vinculin is a cytoskeletal protein associated with cell-cell and cell-matrix junctions, where it is thought to function as one of several interacting proteins involved in anchoring F-actin to the membrane. Defects in VCL are the cause of cardiomyopathy dilated type 1W. Dilated cardiomyopathy is a disorder characterized by ventricular dilation and impaired systolic function, resulting in congestiv…	hsa04510 (Focal adhesion), hsa04520 (Adherens junction), hsa04670 (Leukocyte transendothelial migration), hsa04810 (Regulation of actin cytoskeleton), hsa05100 (Bacterial invasion of epithelial cells), hsa05131 (Shigellosis), hsa05146 (Amoebiasis), GO:0002009 (morphogenesis of an epithelium), GO:0002576 (platelet degranulation), GO:0006928 (cellular component movement), GO:0006936 (muscle contrac…			0.647265	0.536202		-0.0904751	-0.091758	-0.293971		-0.415616	-0.250338	-0.0413086					194.012	89.3966	93.9656	-0.786803	7.17016	22.0675	0.000552684	0.0315542	1.92482e-05	0.133469	0.23887	-0.64254	-0.839692	0.085764	0.00910059		218.832	202.469	130.428	130.31	113.006	103.707	116.538	135.019
ENSG00000174748	RPL15	PC	ribosomal protein L15	Ribosomes, the organelles that catalyze protein synthesis, consist of a small 40S subunit and a large 60S subunit. Together these subunits are composed of 4 RNA species and approximately 80 structurally distinct proteins. This gene encodes a ribosomal protein that is a component of the 60S subunit. The protein belongs to the L15E family of ribosomal proteins. It is located in the cytoplasm. This …	hsa03010 (Ribosome), GO:0000184 (nuclear-transcribed mRNA catabolic process, nonsense-mediated decay), GO:0002181 (cytoplasmic translation), GO:0006364 (rRNA processing), GO:0006412 (translation), GO:0006413 (translational initiation), GO:0006614 (SRP-dependent cotranslational protein targeting to membrane), GO:0019083 (viral transcription), GO:0045471 (response to ethanol), GO:0005634 (nucleus),…			0.93975	0.788678		-0.3617	-0.243536	-0.30179		-0.371265	-0.177021	-0.273116					193.557	95.307	55.6506	-1.07237	8.19138	24.1352	0.000385648	0.027495	3.14183e-06	0.133469	0.23887	-0.566947	-0.815377	0.1428	0.0136345		524.89	472.507	211.769	230.015	220.833	210.356	240.962	225.306
ENSG00000207145	SNORA18	snoRNA	small nucleolar RNA, H/ACA box 18					-0.487168	-0.679876		0.185422	0.0675617	0.0365283		0.395677	0.240927	0.240927					193.471	4.65773	0.67049	1.36787	1.87337	16.3931	0.00169659	0.0490628	0.000188189	0.0423134	0.23887	0.950586	0.935259	0.000290566	0.000645886		1.76572	1.29486	4.0023	3.53144	3.41373	4.94402	4.23773	4.23773
ENSG00000105887	MTPN	PC	myotrophin	The transcript produced from this gene is bi-cistronic and can encode both myotrophin and leucine zipper protein 6. The myotrophin protein is associated with cardiac hypertrophy, where it is involved in the conversion of NFkappa B p50-p65 heterodimers to p50-p50 and p65-p65 homodimers. This protein also has a potential function in cerebellar morphogenesis, and it may be involved in the differenti…	GO:0006417 (regulation of translation), GO:0006584 (catecholamine metabolic process), GO:0010557 (positive regulation of macromolecule biosynthetic process), GO:0010613 (positive regulation of cardiac muscle hypertrophy), GO:0016049 (cell growth), GO:0016202 (regulation of striated muscle tissue development), GO:0021707 (cerebellar granule cell differentiation), GO:0030182 (neuron differentiation…			-0.627565	-0.0803412		-0.182223	-0.147457	-0.143645		0.492438	0.482607	0.206188					193.414	71.198	80.5911	0.79084	5.61467	19.4591	0.000900861	0.0381051	7.21781e-05	0.082085	0.23887	0.755929	0.855192	0.0300197	0.00679072		29.8995	44.6139	41.4356	42.495	42.6127	67.3328	66.8619	54.855
ENSG00000213281	NRAS	PC	NRAS proto-oncogene, GTPase	This is an N-ras oncogene encoding a membrane protein that shuttles between the Golgi apparatus and the plasma membrane. This shuttling is regulated through palmitoylation and depalmitoylation by the ZDHHC9-GOLGA7 complex. The encoded protein, which has intrinsic GTPase activity, is activated by a guanine nucleotide-exchange factor and inactivated by a GTPase activating protein. Mutations in this…	hsa01521 (EGFR tyrosine kinase inhibitor resistance), hsa01522 (Endocrine resistance), hsa04010 (MAPK signaling pathway), hsa04012 (ErbB signaling pathway), hsa04014 (Ras signaling pathway), hsa04015 (Rap1 signaling pathway), hsa04062 (Chemokine signaling pathway), hsa04068 (FoxO signaling pathway), hsa04071 (Sphingolipid signaling pathway), hsa04072 (Phospholipase D signaling pathway), hsa04137 …			-0.268675	-0.264833		-0.132918	-0.241993	-0.208396		0.678448	0.289114	0.149254					193.132	72.7858	97.1592	0.723161	5.72394	16.4238	0.00168529	0.0489857	0.000279458	0.0439369	0.23887	0.944911	0.778152	0.000400878	0.0229563		42.1419	42.2596	46.4973	42.9659	44.0253	83.1066	62.9774	56.9739
ENSG00000105819	PMPCB	PC	peptidase, mitochondrial processing beta subunit	This gene is a member of the peptidase M16 family and encodes a protein with a zinc-binding motif. This protein is located in the mitochondrial matrix and catalyzes the cleavage of the leader peptides of precursor proteins newly imported into the mitochondria, though it only functions as part of a heterodimeric complex. [provided by RefSeq, Jul 2008].	GO:0006122 (mitochondrial electron transport, ubiquinol to cytochrome c), GO:0009060 (aerobic respiration), GO:0016485 (protein processing), GO:0005739 (mitochondrion), GO:0005750 (mitochondrial respiratory chain complex III), GO:0005759 (mitochondrial matrix), GO:0004222 (metalloendopeptidase activity), GO:0008270 (zinc ion binding), R-HSA-1268020 (Homo sapiens: Mitochondrial protein import), R-…			0.41241	0.516464		-0.263238	-0.0254365	-0.0183816		-0.381964	-0.166483	-0.0733718					193.039	79.3578	60.3352	-0.653383	6.19269	18.7074	0.00104546	0.0407262	0.000141743	0.0956344	0.23887	-0.793725	-0.854026	0.0186875	0.00694964		95.5843	102.883	59.0928	70.0402	70.3934	54.2665	63.3305	67.686
ENSG00000075426	FOSL2	PC	FOS like 2, AP-1 transcription factor subunit	The Fos gene family consists of 4 members: FOS, FOSB, FOSL1, and FOSL2. These genes encode leucine zipper proteins that can dimerize with proteins of the JUN family, thereby forming the transcription factor complex AP-1. As such, the FOS proteins have been implicated as regulators of cell proliferation, differentiation, and transformation. [provided by RefSeq, Jul 2014]. Publication Note: This Re…	hsa04380 (Osteoclast differentiation), GO:0003334 (keratinocyte development), GO:0006357 (regulation of transcription from RNA polymerase II promoter), GO:0006366 (transcription from RNA polymerase II promoter), GO:0008219 (cell death), GO:0045944 (positive regulation of transcription from RNA polymerase II promoter), GO:0048146 (positive regulation of fibroblast proliferation), GO:0005634 (nucle…			-0.289583	-0.688603		-0.369206	-0.00888936	-0.151191		0.896443	0.635951	-0.0249203					192.821	50.4058	93.4804	1.17415	4.39416	18.4568	0.00109959	0.0413168	6.06531e-05	0.102512	0.23887	0.806324	0.76662	0.0156261	0.0264756		15.5383	11.3006	14.5966	19.3052	17.3041	37.9041	31.3121	19.0698
ENSG00000170949	ZNF160	PC	zinc finger protein 160	The protein encoded by this gene is a Kruppel-related zinc finger protein which is characterized by the presence of an N-terminal repressor domain, the Kruppel-associated box (KRAB). The KRAB domain is a potent repressor of transcription; thus this protein may function in transcription regulation. Three alternative transcripts encoding the same protein have been described. [provided by RefSeq, Ju…	GO:0006351 (transcription, DNA-templated), GO:0006355 (regulation of transcription, DNA-templated), GO:0030097 (hemopoiesis), GO:0005634 (nucleus), GO:0003677 (DNA binding), GO:0046872 (metal ion binding), R-HSA-212436 (Homo sapiens: Generic Transcription Pathway), R-HSA-74160 (Homo sapiens: Gene Expression)			-0.274806	-0.430946		-0.0366186	-0.117246	-0.274806		0.537902	0.48426	0.11226					192.598	29.6136	65.0551	0.939284	3.27092	16.7029	0.00158627	0.0481079	0.000260954	0.0513353	0.23887	0.9189	0.857783	0.00125373	0.00644586		7.1806	6.23888	8.8286	8.24003	7.1806	14.1258	13.5372	10.0057
ENSG00000180628	PCGF5	PC	polycomb group ring finger 5		hsa04550 (Signaling pathways regulating pluripotency of stem cells), GO:0006351 (transcription, DNA-templated), GO:0045944 (positive regulation of transcription from RNA polymerase II promoter), GO:0005634 (nucleus), GO:0005730 (nucleolus), GO:0005813 (centrosome), GO:0031519 (PcG protein complex), GO:0005515 (protein binding), GO:0008270 (zinc ion binding)			0.430248	0.349172		-0.00866405	0.17192	-0.0520598		-0.515668	-0.278146	-0.0968015					192.537	40.7992	97.5298	-0.769639	3.86319	16.3475	0.00171357	0.0491833	0.000391767	0.0439369	0.23887	-0.944911	-0.925713	0.000400878	0.000968621		19.5406	18.3635	13.8903	16.0092	13.4195	9.18175	11.1829	12.9486
ENSG00000189171	S100A13	PC	S100 calcium binding protein A13	The protein encoded by this gene is a member of the S100 family of proteins containing 2 EF-hand calcium-binding motifs. S100 proteins are localized in the cytoplasm and/or nucleus of a wide range of cells, and involved in the regulation of a number of cellular processes such as cell cycle progression and differentiation. S100 genes include at least 13 members which are located as a cluster on ch…	GO:0008284 (positive regulation of cell proliferation), GO:0008360 (regulation of cell shape), GO:0043123 (positive regulation of I-kappaB kinase/NF-kappaB signaling), GO:0043303 (mast cell degranulation), GO:0046688 (response to copper ion), GO:0050663 (cytokine secretion), GO:0050703 (interleukin-1 alpha secretion), GO:0051602 (response to electrical stimulus), GO:0005615 (extracellular space),…			-0.208137	-0.37041		0.0209147	-0.111362	0.0265969		0.433961	0.164926	0.0435104					192.302	89.6613	16.2064	0.515682	7.2005	16.3176	0.00172484	0.0493759	0.000615559	0.0439369	0.23887	0.944911	0.835188	0.000400878	0.0098541		125.248	111.711	147.143	134.077	147.732	196.584	162.799	149.498
ENSG00000197223	C1D	PC	C1D nuclear receptor corepressor	The protein encoded by this gene is a DNA binding and apoptosis-inducing protein and is localized in the nucleus. It is also a Rac3-interacting protein which acts as a corepressor for the thyroid hormone receptor. This protein is thought to regulate TRAX/Translin complex formation. Alternate splicing results in multiple transcript variants that encode the same protein. Multiple pseudogenes of thi…	hsa03018 (RNA degradation), GO:0000460 (maturation of 5.8S rRNA), GO:0006351 (transcription, DNA-templated), GO:0006364 (rRNA processing), GO:0006915 (apoptotic process), GO:0045892 (negative regulation of transcription, DNA-templated), GO:0000176 (nuclear exosome (RNase complex)), GO:0005634 (nucleus), GO:0005654 (nucleoplasm), GO:0005730 (nucleolus), GO:0005737 (cytoplasm), GO:0017053 (transcri…			-0.328645	-0.376479		-0.282347	-0.137943	-0.137943		0.777231	0.0903457	0.395781					192.149	35.9915	25.6815	0.985987	3.62589	16.2246	0.00176039	0.0495181	0.000270539	0.0423134	0.23887	0.950586	0.782045	0.000290566	0.0218377		8.8286	8.47546	9.18175	10.3589	10.3589	21.3064	12.4778	15.8915
ENSG00000161542	PRPSAP1	PC	phosphoribosyl pyrophosphate synthetase associated protein 1		GO:0006139 (nucleobase-containing compound metabolic process), GO:0009165 (nucleotide biosynthetic process), GO:0043086 (negative regulation of catalytic activity), GO:0000287 (magnesium ion binding), GO:0004749 (ribose phosphate diphosphokinase activity), GO:0004857 (enzyme inhibitor activity), GO:0005515 (protein binding), GO:0042802 (identical protein binding)			-0.165021	-0.292536		-0.0279114	-0.193634	-0.126316		0.421401	0.247296	0.136721					192.097	82.3659	32.6158	0.534017	6.43889	17.1596	0.00143864	0.0461377	0.000473941	0.0621765	0.23887	0.881917	0.859272	0.00376031	0.00625282		75.926	69.334	83.6951	74.3957	78.0448	115.007	101.705	94.054
ENSG00000082212	ME2	PC	malic enzyme 2	This gene encodes a mitochondrial NAD-dependent malic enzyme, a homotetrameric protein, that catalyzes the oxidative decarboxylation of malate to pyruvate. It had previously been weakly linked to a syndrome known as Friedreich ataxia that has since been shown to be the result of mutation in a completely different gene. Certain single-nucleotide polymorphism haplotypes of this gene have been shown…	hsa00620 (Pyruvate metabolism), hsa01200 (Carbon metabolism), GO:0006090 (pyruvate metabolic process), GO:0006108 (malate metabolic process), GO:0055114 (oxidation-reduction process), GO:1902031 (regulation of NADP metabolic process), GO:0005739 (mitochondrion), GO:0005759 (mitochondrial matrix), GO:0004470 (malic enzyme activity), GO:0004471 (malate dehydrogenase (decarboxylating) (NAD+) activit…			0.462043	0.312057		0.0610758	-0.0297689	-0.163656		-0.410419	-0.201562	-0.0297689					192.007	81.3603	89.7662	-0.590117	6.33937	17.8417	0.00124708	0.042796	0.000261842	0.0796494	0.23887	-0.836516	-0.86846	0.00962802	0.00514347		110.063	98.9981	82.8711	77.6917	70.6288	59.2105	68.7454	77.6917
ENSG00000108854	SMURF2	PC	SMAD specific E3 ubiquitin protein ligase 2		hsa04120 (Ubiquitin mediated proteolysis), hsa04144 (Endocytosis), hsa04340 (Hedgehog signaling pathway), hsa04350 (TGF-beta signaling pathway), GO:0000122 (negative regulation of transcription from RNA polymerase II promoter), GO:0000209 (protein polyubiquitination), GO:0006511 (ubiquitin-dependent protein catabolic process), GO:0016579 (protein deubiquitination), GO:0017015 (regulation of trans…			0.720722	0.646161		-0.112126	-0.179994	-0.300722		-0.505243	-0.131193	-0.137605					191.82	75.0176	77.8915	-0.91125	5.88239	21.6974	0.000590893	0.0327602	1.82879e-05	0.133469	0.23887	-0.64254	-0.835463	0.085764	0.00980704		93.8186	88.9923	51.7945	49.3225	45.2024	38.9636	51.0882	50.8527
ENSG00000111358	GTF2H3	PC	general transcription factor IIH subunit 3	This gene encodes a member of the TFB4 family. The encoded protein is a subunit of the core-TFIIH basal transcription factor and localizes to the nucleus. The encoded protein is involved in RNA transcription by RNA polymerase II and nucleotide excision repair and associates with the Cdk-activating kinase complex. Alternative splicing results in multiple transcript variants. A related pseudogene h…	hsa03022 (Basal transcription factors), hsa03420 (Nucleotide excision repair), hsa05203 (Viral carcinogenesis), GO:0000717 (nucleotide-excision repair, DNA duplex unwinding), GO:0006281 (DNA repair), GO:0006283 (transcription-coupled nucleotide-excision repair), GO:0006289 (nucleotide-excision repair), GO:0006293 (nucleotide-excision repair, preincision complex stabilization), GO:0006294 (nucleot…			-0.48359	-0.579816		0.0433866	-0.000337987	0.186761		0.281094	0.477171	0.0753318					191.469	39.5113	29.1839	0.902148	3.80211	17.261	0.00140807	0.0456447	0.000255371	0.0685251	0.23887	0.869318	0.886401	0.00504681	0.00335973		8.94632	8.24003	13.7726	13.3018	15.4206	16.5978	19.3052	14.1258
ENSG00000150760	DOCK1	PC	dedicator of cytokinesis 1	This gene encodes a member of the dedicator of cytokinesis protein family. Dedicator of cytokinesis proteins act as guanine nucleotide exchange factors for small Rho family G proteins. The encoded protein regulates the small GTPase Rac, thereby influencing several biological processes, including phagocytosis and cell migration. Overexpression of this gene has also been associated with certain can…	hsa04510 (Focal adhesion), hsa04810 (Regulation of actin cytoskeleton), hsa05100 (Bacterial invasion of epithelial cells), hsa05131 (Shigellosis), GO:0006911 (phagocytosis, engulfment), GO:0006915 (apoptotic process), GO:0007010 (cytoskeleton organization), GO:0007165 (signal transduction), GO:0007229 (integrin-mediated signaling pathway), GO:0007264 (small GTPase mediated signal transduction), G…			-0.539874	-0.227058		-0.0762663	-0.202809	0.12873		0.421724	0.230181	0.265373					191.451	41.355	83.5112	0.783091	3.89065	16.2088	0.00176649	0.0495668	0.000430299	0.0439369	0.23887	0.944911	0.908142	0.000400878	0.0018067		9.18175	11.8892	13.4195	12.1246	15.7738	19.7761	17.0686	17.5395
ENSG00000139329	LUM	PC	lumican	This gene encodes a member of the small leucine-rich proteoglycan (SLRP) family that includes decorin, biglycan, fibromodulin, keratocan, epiphycan, and osteoglycin. In these bifunctional molecules, the protein moiety binds collagen fibrils and the highly charged hydrophilic glycosaminoglycans regulate interfibrillar spacings. Lumican is the major keratan sulfate proteoglycan of the cornea but is…	hsa05205 (Proteoglycans in cancer), GO:0007601 (visual perception), GO:0014070 (response to organic cyclic compound), GO:0018146 (keratan sulfate biosynthetic process), GO:0030198 (extracellular matrix organization), GO:0030199 (collagen fibril organization), GO:0032914 (positive regulation of transforming growth factor beta1 production), GO:0042340 (keratan sulfate catabolic process), GO:0045944…			0.627546	0.686441		-0.0505556	-0.257018	-0.176094		-0.275635	-0.0346132	-0.520071					191.313	50.4852	58.7472	-0.962008	4.4002	19.8919	0.000828287	0.0361837	4.73726e-05	0.119433	0.23887	-0.718132	-0.850389	0.0448173	0.00746068		31.9007	33.3133	19.1875	16.3623	17.4218	16.1269	19.4229	13.3018
ENSG00000063601	MTMR1	PC	myotubularin related protein 1	This gene encodes a member of the myotubularin related family of proteins. Members of this family contain the consensus sequence for the active site of protein tyrosine phosphatases. Alternatively spliced variants have been described but their biological validity has not been determined. [provided by RefSeq, Jul 2008].	hsa00562 (Inositol phosphate metabolism), hsa01100 (Metabolic pathways), hsa04070 (Phosphatidylinositol signaling system), GO:0006661 (phosphatidylinositol biosynthetic process), GO:0035335 (peptidyl-tyrosine dephosphorylation), GO:0046856 (phosphatidylinositol dephosphorylation), GO:0005737 (cytoplasm), GO:0005829 (cytosol), GO:0005886 (plasma membrane), GO:0004438 (phosphatidylinositol-3-phosph…			-0.503238	-0.449794		0.072666	0.0542864	0.135211		0.169771	0.2365	0.284597					191.252	43.6397	49.4486	0.756627	4.02189	16.1833	0.00177643	0.0496907	0.00055564	0.0439369	0.23887	0.944911	0.938033	0.000400878	0.000567556		10.4766	10.9475	16.5978	16.3623	17.4218	17.8926	18.8344	19.5406
ENSG00000254673	AC110275.1	PC						0.707129	0.462495		-0.0167032	-0.292936	-0.118591		-0.166291	-0.346879	-0.228224					190.694	40.6228	6.81959	-0.908616	3.85588	18.368	0.00111958	0.0414133	0.000119563	0.0956344	0.23887	-0.793725	-0.847838	0.0186875	0.00783305		23.6607	19.6584	13.5372	10.8298	12.4778	12.0069	10.3589	11.4183
ENSG00000105576	TNPO2	PC	transportin 2		GO:0000060 (protein import into nucleus, translocation), GO:0006607 (NLS-bearing protein import into nucleus), GO:0006610 (ribosomal protein import into nucleus), GO:0005634 (nucleus), GO:0005737 (cytoplasm), GO:0031965 (nuclear membrane), GO:0034399 (nuclear periphery), GO:0005515 (protein binding), GO:0008139 (nuclear localization sequence binding), GO:0008536 (Ran GTPase binding), GO:0008565 (…			-0.265722	-0.580603		0.158722	-0.0419787	0.0289245		0.405667	0.240665	0.0543251					190.668	76.7996	62.7525	0.651962	6.00975	17.1525	0.00144079	0.0461377	0.000301957	0.0685251	0.23887	0.869318	0.862439	0.00504681	0.00585471		52.0299	41.4356	70.5111	61.0939	64.2722	84.0483	74.7488	65.4494
ENSG00000138050	THUMPD2	PC	THUMP domain containing 2		GO:0032259 (methylation), GO:0003723 (RNA binding), GO:0008168 (methyltransferase activity)			0.474896	0.217387		-0.0161177	0.0963641	-0.0258994		-0.283076	-0.271393	-0.19216					190.389	43.4721	43.2289	-0.670181	4.01008	16.0734	0.00182001	0.0501349	0.000733316	0.0439369	0.23887	-0.944911	-0.92772	0.000400878	0.000893601		22.4835	18.4812	15.4206	16.8332	15.3029	12.4778	12.5955	13.4195
ENSG00000258800	AL136038.2	lincRNA						0.821514	0.555202		-0.296853	-0.0104867	-0.19495		-0.19495	-0.484528	-0.19495					190.3	9.34192	1.04985	-1.38862	2.15177	19.3784	0.000915215	0.0381429	3.50771e-05	0.107394	0.23887	-0.735867	-0.844455	0.0374248	0.00834482		8.47546	6.70974	2.82515	3.88458	3.1783	3.1783	2.23658	3.1783
ENSG00000229833	PET100	PC	PET100 homolog	Mitochondrial complex IV, or cytochrome c oxidase, is a large transmembrane protein complex that is part of the respiratory electron transport chain of mitochondria. The small protein encoded by this gene plays a role in the biogenesis of mitochondrial complex IV. This protein localizes to the inner mitochondrial membrane and is exposed to the intermembrane space. Mutations in this gene are assoc…	GO:0033617 (mitochondrial respiratory chain complex IV assembly), GO:0031305 (integral component of mitochondrial inner membrane), GO:0051082 (unfolded protein binding)			-0.329052	-0.356276		0.0275423	-0.175688	0.0380354		0.347383	0.205647	0.242407					190.28	40.1994	6.44905	0.698006	3.83669	16.0595	0.00182561	0.0501349	0.00069791	0.0439369	0.23887	0.944911	0.953692	0.000400878	0.000239714		10.5943	10.3589	14.1258	12.0069	14.2435	18.1281	16.2446	16.7155
ENSG00000235674	LDHAP2	p_Pg	lactate dehydrogenase A pseudogene 2					-0.935885	-0.459275		0.348269	-0.211278	0.064421		0.348269	0.471672	0.373808					190.113	4.65773	22.6114	1.73786	1.87337	16.4649	0.00167023	0.0489244	4.89246e-05	0.0537348	0.23887	0.912563	0.903381	0.00156352	0.00209466		0.706288	1.76572	4.59087	2.47201	3.41373	4.59087	5.17945	4.70859
ENSG00000108654	DDX5	PC	DEAD-box helicase 5	DEAD box proteins, characterized by the conserved motif Asp-Glu-Ala-Asp (DEAD), are putative RNA helicases. They are implicated in a number of cellular processes involving alteration of RNA secondary structure, such as translation initiation, nuclear and mitochondrial splicing, and ribosome and spliceosome assembly. Based on their distribution patterns, some members of this family are believed to…	hsa03040 (Spliceosome), hsa05202 (Transcriptional misregulation in cancer), hsa05205 (Proteoglycans in cancer), GO:0000122 (negative regulation of transcription from RNA polymerase II promoter), GO:0000380 (alternative mRNA splicing, via spliceosome), GO:0000381 (regulation of alternative mRNA splicing, via spliceosome), GO:0000398 (mRNA splicing, via spliceosome), GO:0000956 (nuclear-transcribed…			0.479861	0.622401		-0.265905	-0.190987	-0.0575618		-0.135249	-0.269843	-0.182715					190.095	97.4418	22.0644	-0.703758	8.90285	21.4073	0.000623024	0.0331913	3.09726e-05	0.133469	0.23887	-0.64254	-0.82886	0.085764	0.0109779		649.785	717.471	386.693	407.411	447.08	423.537	385.633	409.765
ENSG00000186222	BLOC1S4	PC	biogenesis of lysosomal organelles complex 1 subunit 4	This intronless gene encodes a protein that may play a role in organelle biogenesis associated with melanosomes, platelet dense granules, and lysosomes. A similar protein in mouse is a component of a protein complex termed biogenesis of lysosome-related organelles complex 1 (BLOC-1), and is a model for Hermansky-Pudlak syndrome. The encoded protein may play a role in intracellular vesicular traff…	GO:0008089 (anterograde axon cargo transport), GO:0031175 (neuron projection development), GO:0032438 (melanosome organization), GO:0046907 (intracellular transport), GO:0048490 (anterograde synaptic vesicle transport), GO:0050885 (neuromuscular process controlling balance), GO:0070527 (platelet aggregation), GO:0005737 (cytoplasm), GO:0005829 (cytosol), GO:0031083 (BLOC-1 complex), GO:1904115 (N…			-0.333395	-0.353025		-0.0192679	-0.0429852	0.0496308		0.315167	0.0938006	0.290075					189.617	49.7001	59.6471	0.62939	4.35527	15.9751	0.00186005	0.0504522	0.000894089	0.0439369	0.23887	0.944911	0.946358	0.000400878	0.000370523		15.4206	15.1852	19.6584	19.3052	20.7178	25.3087	21.4241	24.8378
ENSG00000035862	TIMP2	PC	TIMP metallopeptidase inhibitor 2	This gene is a member of the TIMP gene family. The proteins encoded by this gene family are natural inhibitors of the matrix metalloproteinases, a group of peptidases involved in degradation of the extracellular matrix. In addition to an inhibitory role against metalloproteinases, the encoded protein has a unique role among TIMP family members in its ability to directly suppress the proliferation…	GO:0007417 (central nervous system development), GO:0007568 (aging), GO:0008285 (negative regulation of cell proliferation), GO:0009725 (response to hormone), GO:0010951 (negative regulation of endopeptidase activity), GO:0022617 (extracellular matrix disassembly), GO:0032487 (regulation of Rap protein signal transduction), GO:0034097 (response to cytokine), GO:0042493 (response to drug), GO:0043…			-0.195895	-0.166038		-0.00604959	-0.048033	-0.0948998		0.240036	0.132152	0.138727					189.611	96.8507	92.1835	0.360638	8.64421	15.9744	0.00186036	0.0504522	0.00186514	0.0439369	0.23887	0.944911	0.944939	0.000400878	0.000400284		347.023	354.321	396.11	384.692	372.332	470.152	436.133	438.134
ENSG00000115091	ACTR3	PC	ARP3 actin related protein 3 homolog	The specific function of this gene has not yet been determined; however, the protein it encodes is known to be a major constituent of the ARP2/3 complex. This complex is located at the cell surface and is essential to cell shape and motility through lamellipodial actin assembly and protrusion. Three transcript variants encoding two different isoforms have been found for this gene. [provided by Re…	hsa04530 (Tight junction), GO:0006928 (cellular component movement), GO:0007163 (establishment or maintenance of cell polarity), GO:0008356 (asymmetric cell division), GO:0016344 (meiotic chromosome movement towards spindle pole), GO:0033206 (meiotic cytokinesis), GO:0034314 (Arp2/3 complex-mediated actin nucleation), GO:0038096 (Fc-gamma receptor signaling pathway involved in phagocytosis), GO:0…			0.267189	0.528502		0.10208	-0.00413299	-0.121635		-0.428167	-0.392521	0.0486861					189.473	94.6277	78.2885	-0.636391	8.04168	18.1921	0.00116042	0.0418247	0.000146416	0.0956344	0.23887	-0.793725	-0.841218	0.0186875	0.008854		310.414	372.449	276.63	256.853	236.607	190.933	195.76	266.506
ENSG00000277801	AL138478.1	lincRNA						0.44468	0.852798		-0.325118	-0.0078823	0.119245		-0.255845	-0.701335	-0.126543					189.136	23.5886	14.2744	-1.24362	2.94403	18.1435	0.00117199	0.0419108	6.64142e-05	0.0956344	0.23887	-0.793725	-0.842951	0.0186875	0.00857907		10.2412	14.2435	5.17945	6.94517	7.76917	5.53259	3.53144	6.23888
ENSG00000197965	MPZL1	PC	myelin protein zero like 1		hsa04514 (Cell adhesion molecules (CAMs)), GO:0007169 (transmembrane receptor protein tyrosine kinase signaling pathway), GO:0007267 (cell-cell signaling), GO:0005887 (integral component of plasma membrane), GO:0005925 (focal adhesion), GO:0009986 (cell surface), GO:0005198 (structural molecule activity), GO:0005515 (protein binding)			0.173422	0.349621		-0.0685543	0.123047	0.00283128		-0.270191	-0.22056	-0.0896163					189.109	81.9248	54.592	-0.464105	6.39567	15.9106	0.00188692	0.0507622	0.00111221	0.0439369	0.23887	-0.944911	-0.905336	0.000400878	0.00197307		94.054	106.532	79.222	90.758	83.342	68.6277	71.0997	78.0448
ENSG00000075413	MARK3	PC	microtubule affinity regulating kinase 3	The protein encoded by this gene is activated by phosphorylation and in turn is involved in the phosphorylation of tau proteins MAP2 and MAP4. Several transcript variants encoding different isoforms have been found for this gene. [provided by RefSeq, Oct 2011].	GO:0000165 (MAPK cascade), GO:0000226 (microtubule cytoskeleton organization), GO:0030010 (establishment of cell polarity), GO:0005829 (cytosol), GO:0005886 (plasma membrane), GO:0070062 (extracellular vesicular exosome), GO:0004674 (protein serine/threonine kinase activity), GO:0005515 (protein binding), GO:0005524 (ATP binding), R-HSA-112399 (Homo sapiens: IRS-mediated signalling), R-HSA-112412…			-0.321171	-0.330274		0.0419125	-0.0603999	0.0241665		0.432053	0.0663958	0.147318					189.027	69.4866	51.5395	0.56522	5.51142	15.9002	0.00189127	0.0507622	0.000832851	0.0439369	0.23887	0.944911	0.866346	0.000400878	0.00538652		35.4321	35.1967	46.1442	42.8481	45.5556	61.0939	46.9682	49.7933
ENSG00000268790	AC008764.4	PC			GO:0016021 (integral component of membrane)			0.397785	0.378418		-0.0409794	-0.0672922	-0.0409794		-0.246107	-0.286752	-0.0940939					188.979	47.2389	3.72298	-0.637683	4.21943	15.8224	0.00192435	0.0507622	0.000747721	0.0423134	0.23887	-0.950586	-0.927859	0.000290566	0.000888564		24.4847	24.1315	17.5395	17.1863	17.5395	14.9498	14.4789	16.8332
ENSG00000266962	AC067852.2	As						-0.524885	-0.471767		0.186679	0.141937	-0.105301		0.20854	0.303011	0.261786					188.714	35.4622	80.6528	0.848256	3.5946	15.8604	0.00190812	0.0507622	0.000487615	0.0439369	0.23887	0.944911	0.920751	0.000400878	0.00117151		7.41603	7.76917	13.4195	12.9486	10.5943	13.6549	14.7143	14.2435
ENSG00000203865	ATP1A1-AS1	PT	ATP1A1 antisense RNA 1					0.741169	0.561719		-0.159023	-0.252528	-0.141417		-0.506773	-0.18484	-0.0583061					188.573	84.386	18.2267	-0.85981	6.62331	21.1524	0.000652956	0.0334263	2.2511e-05	0.133469	0.23887	-0.64254	-0.826508	0.085764	0.0114152		159.033	140.198	84.2837	78.8688	85.3432	65.8025	82.7534	90.5226
ENSG00000151883	PARP8	PC	poly(ADP-ribose) polymerase family member 8		GO:0005622 (intracellular), GO:0003950 (NAD+ ADP-ribosyltransferase activity), R-HSA-1430728 (Homo sapiens: Metabolism), R-HSA-196807 (Homo sapiens: Nicotinate metabolism), R-HSA-196849 (Homo sapiens: Metabolism of water-soluble vitamins and cofactors), R-HSA-196854 (Homo sapiens: Metabolism of vitamins and cofactors), R-HSA-197264 (Homo sapiens: Nicotinamide salvaging)			0.774227	0.390193		0.239315	0.133265	-0.179551		-0.916616	-0.391878	-0.0489544					188.568	34.5095	60.5646	-1.18306	3.53542	16.8693	0.00153051	0.0475912	0.000105494	0.0685251	0.23887	-0.869318	-0.862215	0.00504681	0.00588236		19.6584	14.5966	12.9486	11.8892	9.18175	4.70859	7.65146	10.2412
ENSG00000124688	MAD2L1BP	PC	MAD2L1 binding protein	The protein encoded by this gene was identified as a binding protein of the MAD2 mitotic arrest deficient-like 1 (MAD2/MAD2L1). MAD2 is a key component of the spindle checkpoint that delays the onset of anaphase until all the kinetochores are attached to the spindle. This protein may interact with the spindle checkpoint and coordinate cell cycle events in late mitosis. Alternatively spliced trans…	GO:0007093 (mitotic cell cycle checkpoint), GO:0007096 (regulation of exit from mitosis), GO:0005634 (nucleus), GO:0005730 (nucleolus), GO:0005737 (cytoplasm), GO:0005819 (spindle), GO:0031965 (nuclear membrane), GO:0005515 (protein binding)			-0.273594	-0.223795		0.0132482	-0.0243996	-0.0154525		0.220576	0.22813	0.0752871					188.162	80.0371	31.5218	0.43175	6.24316	15.7905	0.00193813	0.0507622	0.00166624	0.0439369	0.23887	0.944911	0.954941	0.000400878	0.000221057		61.6825	63.9191	75.6905	73.6894	74.1603	87.6974	88.1683	79.1043
ENSG00000164162	ANAPC10	PC	anaphase promoting complex subunit 10	ANAPC10 is a core subunit of the anaphase-promoting complex (APC), or cyclosome, a ubiquitin protein ligase that is essential for progression through the cell cycle. APC initiates sister chromatid separation by ubiquitinating the anaphase inhibitor securin (PTTG1; MIM 604147) and triggers exit from mitosis by ubiquitinating cyclin B (CCNB1; MIM 123836), the activating subunit of cyclin-dependent …	hsa04110 (Cell cycle), hsa04114 (Oocyte meiosis), hsa04120 (Ubiquitin mediated proteolysis), hsa04914 (Progesterone-mediated oocyte maturation), hsa05166 (Human T-cell leukemia virus 1 infection), GO:0007067 (mitotic nuclear division), GO:0030071 (regulation of mitotic metaphase/anaphase transition), GO:0031145 (anaphase-promoting complex-dependent proteasomal ubiquitin-dependent protein cataboli…			0.718324	0.491078		-0.0603703	0.0589383	-0.379223		-0.363791	-0.274515	-0.190442					188.047	37.5441	13.2422	-0.982199	3.70127	19.3866	0.000913742	0.0381429	6.71556e-05	0.119433	0.23887	-0.718132	-0.857561	0.0448173	0.00647501		21.4241	18.0103	11.6538	12.8309	8.94632	9.06403	9.77032	10.4766
ENSG00000182400	TRAPPC6B	PC	trafficking protein particle complex 6B	TRAPPC6B is a component of TRAPP complexes, which are tethering complexes involved in vesicle transport (Kummel et al., 2005 [PubMed 16025134]).[supplied by OMIM, Mar 2008].	GO:0006888 (ER to Golgi vesicle-mediated transport), GO:0043547 (positive regulation of GTPase activity), GO:0048208 (COPII vesicle coating), GO:0061024 (membrane organization), GO:0000139 (Golgi membrane), GO:0005783 (endoplasmic reticulum), GO:0005801 (cis-Golgi network), GO:0005802 (trans-Golgi network), GO:0005829 (cytosol), GO:0030008 (TRAPP complex), GO:0005515 (protein binding), GO:0017112…			0.70096	0.897234		-0.23529	-0.427954	-0.0902265		-0.167539	-0.427954	-0.24923					187.958	38.6115	73.5686	-1.17996	3.75886	20.0814	0.000798696	0.035506	3.1588e-05	0.12489	0.23887	-0.684422	-0.824279	0.0611479	0.0118399		21.4241	24.8378	10.2412	8.71089	11.536	10.8298	8.71089	10.1235
ENSG00000119285	HEATR1	PC	HEAT repeat containing 1		hsa03008 (Ribosome biogenesis in eukaryotes), GO:0000462 (maturation of SSU-rRNA from tricistronic rRNA transcript (SSU-rRNA, 5.8S rRNA, LSU-rRNA)), GO:0006364 (rRNA processing), GO:0045943 (positive regulation of transcription from RNA polymerase I promoter), GO:2000234 (positive regulation of rRNA processing), GO:0001650 (fibrillar center), GO:0005654 (nucleoplasm), GO:0005730 (nucleolus), GO:0…			0.481508	0.388392		0.0421912	-0.0722774	-0.0591008		-0.500656	-0.140028	-0.140028					187.465	35.3299	93.1539	-0.783206	3.58579	15.6313	0.00200853	0.0512808	0.000465829	0.0423134	0.23887	-0.950586	-0.913042	0.000290566	0.00153854		16.8332	15.6561	11.8892	10.8298	10.9475	7.53374	10.2412	10.2412
ENSG00000137776	SLTM	PC	SAFB like transcription modulator		GO:0006351 (transcription, DNA-templated), GO:0006357 (regulation of transcription from RNA polymerase II promoter), GO:0006915 (apoptotic process), GO:0050684 (regulation of mRNA processing), GO:0005634 (nucleus), GO:0005654 (nucleoplasm), GO:0016604 (nuclear body), GO:0003690 (double-stranded DNA binding), GO:0003723 (RNA binding), GO:0043565 (sequence-specific DNA binding)			0.574759	1.07555		-0.321215	-0.303065	-0.0551101		-0.0400017	-0.435186	-0.495736					187.452	32.4453	32.9599	-1.31774	3.42116	19.2949	0.000930324	0.0386306	3.80851e-05	0.119433	0.23887	-0.718132	-0.792514	0.0448173	0.0190002		15.3029	22.4835	7.29831	7.41603	9.18175	9.29946	6.59202	6.23888
ENSG00000225206	MIR137HG	lincRNA	MIR137 host gene		hsa05206 (MicroRNAs in cancer)			0.192569	1.03419		-0.086739	-0.129387	-0.100816		-0.347002	-0.433427	-0.129387					187.443	34.9065	75.0331	-1.09972	3.55902	16.1176	0.00180236	0.0500772	0.000224819	0.0537348	0.23887	-0.912563	-0.735348	0.00156352	0.0376298		12.7132	24.3669	10.1235	9.77032	10.0057	8.12231	7.53374	9.77032
ENSG00000087111	PIGS	PC	phosphatidylinositol glycan anchor biosynthesis class S	This gene encodes a protein that is involved in GPI-anchor biosynthesis. The glycosylphosphatidylinositol (GPI) anchor is a glycolipid found on many blood cells and serves to anchor proteins to the cell surface. This gene encodes an essential component of the multisubunit enzyme, GPI transamidase. GPI transamidase mediates GPI anchoring in the endoplasmic reticulum, by catalyzing the transfer of …	hsa00563 (Glycosylphosphatidylinositol (GPI)-anchor biosynthesis), hsa01100 (Metabolic pathways), GO:0016255 (attachment of GPI anchor to protein), GO:0005789 (endoplasmic reticulum membrane), GO:0016020 (membrane), GO:0042765 (GPI-anchor transamidase complex), GO:0003923 (GPI-anchor transamidase activity), GO:0005515 (protein binding), R-HSA-162791 (Homo sapiens: Attachment of GPI anchor to uPAR…			0.340211	0.238817		-0.0341167	-0.00844484	-0.0419082		-0.260837	-0.136061	-0.0976596					187.255	77.2671	43.6612	-0.453732	6.04297	15.6757	0.00198861	0.0510019	0.00137161	0.0439369	0.23887	-0.944911	-0.92619	0.000400878	0.000950451		82.9889	77.2208	63.5659	64.7431	63.2128	54.031	59.0928	60.7408
ENSG00000164949	GEM	PC	GTP binding protein overexpressed in skeletal muscle	The protein encoded by this gene belongs to the RAD/GEM family of GTP-binding proteins. It is associated with the inner face of the plasma membrane and could play a role as a regulatory protein in receptor-mediated signal transduction. Alternative splicing occurs at this locus and two transcript variants encoding the same protein have been identified. [provided by RefSeq, Jul 2008].	GO:0006955 (immune response), GO:0007067 (mitotic nuclear division), GO:0007165 (signal transduction), GO:0007166 (cell surface receptor signaling pathway), GO:0051276 (chromosome organization), GO:0051310 (metaphase plate congression), GO:0005634 (nucleus), GO:0009898 (cytoplasmic side of plasma membrane), GO:0030496 (midbody), GO:0051233 (spindle midzone), GO:0072686 (mitotic spindle), GO:00002…			1.10965	1.41779		-0.808941	-0.262884	-0.262884		-0.645412	-0.223885	-0.323434					187.138	31.4397	39.4707	-1.93126	3.36458	22.8533	0.000480763	0.0295809	4.82715e-06	0.130269	0.23887	-0.570352	-0.806042	0.139877	0.015691		20.2469	25.5441	3.88458	6.59202	6.59202	4.59087	6.82745	6.23888
ENSG00000134453	RBM17	PC	RNA binding motif protein 17	This gene encodes an RNA binding protein. The encoded protein is part of the spliceosome complex and functions in the second catalytic step of mRNA splicing. Alternatively spliced transcript variants have been described. Related pseudogenes exist on chromosomes 9 and 15. [provided by RefSeq, Mar 2009].	hsa03040 (Spliceosome), GO:0000380 (alternative mRNA splicing, via spliceosome), GO:0000398 (mRNA splicing, via spliceosome), GO:0006281 (DNA repair), GO:0043484 (regulation of RNA splicing), GO:0005654 (nucleoplasm), GO:0005681 (spliceosomal complex), GO:0043234 (protein complex), GO:0003723 (RNA binding), GO:0005515 (protein binding), R-HSA-72163 (Homo sapiens: mRNA Splicing - Major Pathway), R…			0.838083	0.731163		-0.4458	-0.241421	-0.026809		-0.384393	-0.282845	-0.187977					186.401	39.3349	38.8443	-1.16582	3.79295	20.7903	0.000698436	0.0344238	2.40599e-05	0.133469	0.23887	-0.64254	-0.835651	0.085764	0.00977488		24.3669	22.4835	8.8286	10.4766	12.4778	9.29946	10.1235	10.9475
ENSG00000070770	CSNK2A2	PC	casein kinase 2 alpha 2		hsa03008 (Ribosome biogenesis in eukaryotes), hsa04064 (NF-kappa B signaling pathway), hsa04137 (Mitophagy - animal), hsa04310 (Wnt signaling pathway), hsa04520 (Adherens junction), hsa05162 (Measles), hsa05168 (Herpes simplex infection), GO:0006351 (transcription, DNA-templated), GO:0006355 (regulation of transcription, DNA-templated), GO:0006457 (protein folding), GO:0006468 (protein phosphoryl…			0.970111	0.409727		-0.222553	-0.0664306	-0.289342		-0.0881729	-0.264374	-0.448964					186.059	75.0088	64.3405	-0.957615	5.88203	19.0809	0.000970459	0.0390112	4.54926e-05	0.119433	0.23887	-0.718132	-0.770238	0.0448173	0.0253379		111.005	74.6311	47.439	53.0893	45.2024	52.2653	46.0264	40.2584
ENSG00000198056	PRIM1	PC	DNA primase subunit 1	The replication of DNA in eukaryotic cells is carried out by a complex chromosomal replication apparatus, in which DNA polymerase alpha and primase are two key enzymatic components. Primase, which is a heterodimer of a small subunit and a large subunit, synthesizes small RNA primers for the Okazaki fragments made during discontinuous DNA replication. The protein encoded by this gene is the small,…	hsa01100 (Metabolic pathways), hsa03030 (DNA replication), GO:0000082 (G1/S transition of mitotic cell cycle), GO:0000722 (telomere maintenance via recombination), GO:0006269 (DNA replication, synthesis of RNA primer), GO:0006270 (DNA replication initiation), GO:0005654 (nucleoplasm), GO:0005658 (alpha DNA polymerase:primase complex), GO:0016020 (membrane), GO:0003697 (single-stranded DNA binding…			0.736462	0.974058		-0.341279	-0.281943	-0.266175		-0.21988	-0.287237	-0.314005					185.964	66.5402	16.8946	-1.12299	5.32276	22.7414	0.0004903	0.0296649	7.78248e-06	0.133469	0.23887	-0.566947	-0.81192	0.1428	0.0143749		63.0951	74.7488	28.8401	30.135	30.4881	31.5475	30.0172	29.4287
ENSG00000213741	RPS29	PC	ribosomal protein S29	Ribosomes, the organelles that catalyze protein synthesis, consist of a small 40S subunit and a large 60S subunit. Together these subunits are composed of 4 RNA species and approximately 80 structurally distinct proteins. This gene encodes a ribosomal protein that is a component of the 40S subunit and a member of the S14P family of ribosomal proteins. The protein, which contains a C2-C2 zinc fing…	hsa03010 (Ribosome), GO:0000184 (nuclear-transcribed mRNA catabolic process, nonsense-mediated decay), GO:0006364 (rRNA processing), GO:0006412 (translation), GO:0006413 (translational initiation), GO:0006614 (SRP-dependent cotranslational protein targeting to membrane), GO:0019083 (viral transcription), GO:0005654 (nucleoplasm), GO:0005829 (cytosol), GO:0005925 (focal adhesion), GO:0015935 (smal…			-0.214094	-0.535858		0.155826	-0.0144206	0.0288011		0.313155	0.0653131	0.201277					185.68	95.5187	52.4746	0.542954	8.22696	16.4818	0.00166413	0.0488752	0.000460268	0.0685251	0.23887	0.869318	0.861136	0.00504681	0.00601656		254.146	202.94	329.013	292.168	301.114	367.152	308.883	339.607
ENSG00000118508	RAB32	PC	RAB32, member RAS oncogene family	Small GTP-binding proteins of the RAB family, such as RAB32, play essential roles in vesicle and granule targeting (Bao et al., 2002 [PubMed 11784320]).[supplied by OMIM, Aug 2009].	GO:0007005 (mitochondrion organization), GO:0016192 (vesicle-mediated transport), GO:0019882 (antigen processing and presentation), GO:0035646 (endosome to melanosome transport), GO:0061024 (membrane organization), GO:0072657 (protein localization to membrane), GO:0090382 (phagosome maturation), GO:1903232 (melanosome assembly), GO:0005739 (mitochondrion), GO:0005741 (mitochondrial outer membrane…			-0.104112	-0.229516		-0.0742789	-0.0980954	-0.0553254		0.20599	0.144866	0.210472					185.489	96.7449	37.5033	0.367828	8.62245	15.4527	0.00209113	0.052105	0.00191417	0.0439369	0.23887	0.944911	0.927144	0.000400878	0.000914739		364.209	333.721	371.861	365.74	376.805	452.024	433.19	453.437
ENSG00000198898	CAPZA2	PC	capping actin protein of muscle Z-line subunit alpha 2	The protein encoded by this gene is a member of the F-actin capping protein alpha subunit family. It is the alpha subunit of the barbed-end actin binding protein Cap Z. By capping the barbed end of actin filaments, Cap Z regulates the growth of the actin filaments at the barbed end. [provided by RefSeq, Jul 2008].	hsa04144 (Endocytosis), GO:0006461 (protein complex assembly), GO:0006928 (cellular component movement), GO:0007596 (blood coagulation), GO:0045087 (innate immune response), GO:0051016 (barbed-end actin filament capping), GO:0005576 (extracellular region), GO:0005829 (cytosol), GO:0005903 (brush border), GO:0008290 (F-actin capping protein complex), GO:0015629 (actin cytoskeleton), GO:0016020 (me…			0.391999	0.765319		-0.21852	-0.167892	-0.0775018		-0.332393	-0.199326	-0.161686					185.489	59.5007	18.0679	-0.830952	4.90418	18.9935	0.000987417	0.0392354	9.25861e-05	0.119433	0.23887	-0.718132	-0.814613	0.0448173	0.013796		38.2573	50.1465	24.3669	25.3087	27.0744	22.3658	24.7201	25.4264
ENSG00000198727	MT-CYB	PC	mitochondrially encoded cytochrome b		hsa00190 (Oxidative phosphorylation), hsa01100 (Metabolic pathways), hsa04260 (Cardiac muscle contraction), hsa04714 (Thermogenesis), hsa04932 (Non-alcoholic fatty liver disease (NAFLD)), hsa05010 (Alzheimer disease), hsa05012 (Parkinson disease), hsa05016 (Huntington disease), R-HSA-1428517 (Homo sapiens: The citric acid (TCA) cycle and respiratory electron transport), R-HSA-1430728 (Homo sapien…			0.695789	0.692783		-0.264463	-0.0476867	-0.368132		-0.395174	-0.222296	-0.090819					184.979	99.9206	32.7658	-0.86557	12.7903	20.5542	0.000730086	0.0345687	2.86203e-05	0.133469	0.23887	-0.64254	-0.819905	0.085764	0.0127018		10971.1	10948.3	5637.83	6552.24	5246.78	5149.31	5805.1	6359.18
ENSG00000015171	ZMYND11	PC	zinc finger MYND-type containing 11	The protein encoded by this gene was first identified by its ability to bind the adenovirus E1A protein. The protein localizes to the nucleus. It functions as a transcriptional repressor, and expression of E1A inhibits this repression. Alternatively spliced transcript variants encoding different isoforms have been identified. [provided by RefSeq, Jul 2008].	GO:0000122 (negative regulation of transcription from RNA polymerase II promoter), GO:0006351 (transcription, DNA-templated), GO:0007049 (cell cycle), GO:0008283 (cell proliferation), GO:0016032 (viral process), GO:0016569 (covalent chromatin modification), GO:0034243 (regulation of transcription elongation from RNA polymerase II promoter), GO:0043124 (negative regulation of I-kappaB kinase/NF-ka…			0.741445	0.741445		-0.163034	-0.213224	-0.291943		-0.102656	-0.278521	-0.433511					184.907	40.5787	84.4552	-1.08958	3.85294	20.4507	0.000744497	0.0345687	3.17837e-05	0.130269	0.23887	-0.646399	-0.840068	0.0832906	0.00903945		23.7784	23.7784	11.7715	11.3006	10.5943	12.36	10.712	9.41718
ENSG00000249936	RAC1P2	p_Pg	Rac family small GTPase 1 pseudogene 2					1.23622	0.207555		-0.188433	-0.0671069	-0.138672		-0.561965	-0.348927	-0.138672					184.809	18.9308	5.76974	-1.4765	2.69473	16.8463	0.00153807	0.0475912	0.000118487	0.0796494	0.23887	-0.836516	-0.710501	0.00962802	0.0482497		16.0092	6.82745	4.70859	5.29716	4.94402	3.1783	4.0023	4.94402
ENSG00000264301	LINC01444	lincRNA	long intergenic non-protein coding RNA 1444					-0.252222	-0.295507		0.0568636	-0.1102	-0.0752034		0.349241	0.0424506	0.284577					184.039	73.8885	9.73974	0.526966	5.80249	16.2628	0.00174568	0.0495181	0.000841504	0.0685251	0.23887	0.869318	0.884615	0.00504681	0.00351579		45.791	44.3784	57.2093	50.735	52.0299	70.5111	56.6208	67.3328
ENSG00000177311	ZBTB38	PC	zinc finger and BTB domain containing 38	The protein encoded by this gene is a zinc finger transcriptional activator that binds methylated DNA. The encoded protein can form homodimers or heterodimers through the zinc finger domains. In mouse, inhibition of this protein has been associated with apoptosis in some cell types. [provided by RefSeq, Jun 2010]. Publication Note: This RefSeq record includes a subset of the publications that are…	GO:0006275 (regulation of DNA replication), GO:0006351 (transcription, DNA-templated), GO:0006974 (cellular response to DNA damage stimulus), GO:0045892 (negative regulation of transcription, DNA-templated), GO:0045944 (positive regulation of transcription from RNA polymerase II promoter), GO:0005634 (nucleus), GO:0005654 (nucleoplasm), GO:0005694 (chromosome), GO:0072562 (blood microparticle), G…			0.430958	0.528173		-0.247911	-0.0513931	-0.00879972		-0.391004	-0.0786671	-0.181357					183.978	60.8769	71.019	-0.703105	4.97945	17.4061	0.00136566	0.044911	0.000243327	0.0956344	0.23887	-0.793725	-0.862229	0.0186875	0.00588066		41.9064	44.967	25.4264	29.4287	30.3704	22.8367	28.8401	26.7212
ENSG00000141543	EIF4A3	PC	eukaryotic translation initiation factor 4A3	This gene encodes a member of the DEAD box protein family. DEAD box proteins, characterized by the conserved motif Asp-Glu-Ala-Asp (DEAD), are putative RNA helicases. They are implicated in a number of cellular processes involving alteration of RNA secondary structure, such as translation initiation, nuclear and mitochondrial splicing, and ribosome and spliceosome assembly. Based on their distrib…	hsa03013 (RNA transport), hsa03015 (mRNA surveillance pathway), hsa03040 (Spliceosome), GO:0000184 (nuclear-transcribed mRNA catabolic process, nonsense-mediated decay), GO:0000289 (nuclear-transcribed mRNA poly(A) tail shortening), GO:0000398 (mRNA splicing, via spliceosome), GO:0006364 (rRNA processing), GO:0006369 (termination of RNA polymerase II transcription), GO:0006405 (RNA export from nu…			-0.114503	-0.258379		-0.0257668	-0.0643832	-0.0583228		0.236064	0.154922	0.13037					183.929	94.5924	32.2894	0.368766	8.03813	15.2565	0.00218651	0.0526368	0.00211913	0.0439369	0.23887	0.944911	0.93849	0.000400878	0.000555287		241.08	218.008	256.5	249.673	250.732	307.942	290.991	286.047
ENSG00000204673	AKT1S1	PC	AKT1 substrate 1	AKT1S1 is a proline-rich substrate of AKT (MIM 164730) that binds 14-3-3 protein (see YWHAH, MIM 113508) when phosphorylated (Kovacina et al., 2003 [PubMed 12524439]).[supplied by OMIM, Mar 2008].	hsa04140 (Autophagy - animal), hsa04150 (mTOR signaling pathway), hsa04152 (AMPK signaling pathway), hsa04211 (Longevity regulating pathway), hsa04213 (Longevity regulating pathway - multiple species), hsa04714 (Thermogenesis), GO:0006469 (negative regulation of protein kinase activity), GO:0032007 (negative regulation of TOR signaling), GO:0038202 (TORC1 signaling), GO:0042981 (regulation of apo…			0.241227	0.185537		0.0700583	0.166049	-0.00600461		-0.339403	-0.221783	-0.0956805					183.435	86.6884	64.3582	-0.448979	6.84521	15.1946	0.00221768	0.0530372	0.00137921	0.0439369	0.23887	-0.944911	-0.910558	0.000400878	0.00167096		134.783	129.604	119.48	127.838	113.242	89.4632	97.2323	106.296
ENSG00000183530	PRR14L	PC	proline rich 14 like					-0.168773	-0.706501		-0.137061	-0.121462	0.0808656		0.146759	0.468713	0.43746					183.113	31.8719	89.6956	0.936306	3.39112	15.1542	0.00223829	0.0531999	0.000368311	0.0439369	0.23887	0.944911	0.879427	0.000400878	0.00399548		8.59317	5.29716	8.8286	8.94632	10.5943	11.1829	14.4789	14.1258
ENSG00000176853	FAM91A1	PC	family with sequence similarity 91 member A1					-0.299475	-0.265526		-0.161966	-0.0711966	-0.137197		0.395696	0.525467	0.0141982					182.886	58.8391	74.9007	0.678342	4.87192	15.1258	0.00225291	0.0532062	0.000691628	0.0439369	0.23887	0.944911	0.813905	0.000400878	0.0139467		22.7189	23.3075	25.1909	26.9567	25.6618	38.0218	41.7887	28.7224
ENSG00000064607	SUGP2	PC	SURP and G-patch domain containing 2	This gene encodes a member of the arginine/serine-rich family of splicing factors. The encoded protein functions in mRNA processing. Alternatively spliced transcript variants have been described. [provided by RefSeq, Feb 2009].	GO:0006397 (mRNA processing), GO:0008380 (RNA splicing), GO:0005654 (nucleoplasm), GO:0016604 (nuclear body), GO:0003723 (RNA binding)			-0.345058	-0.403519		0.0588751	0.122407	0.0803648		0.177832	0.190464	0.118635					182.493	81.5455	87.4724	0.51607	6.35735	16.0572	0.00182654	0.0501349	0.00085599	0.0685251	0.23887	0.869318	0.90675	0.00504681	0.00188804		63.2128	60.6231	84.2837	88.1683	85.5786	91.6997	92.5238	87.9329
ENSG00000120616	EPC1	PC	enhancer of polycomb homolog 1	This gene encodes a member of the polycomb group (PcG) family. The encoded protein is a component of the NuA4 histone acetyltransferase complex and can act as both a transcriptional activator and repressor. The encoded protein has been linked to apoptosis, DNA repair, skeletal muscle differentiation, gene silencing, and adult T-cell leukemia/lymphoma. Alternative splicing results in multiple tran…	GO:0000122 (negative regulation of transcription from RNA polymerase II promoter), GO:0006351 (transcription, DNA-templated), GO:0035886 (vascular smooth muscle cell differentiation), GO:0040008 (regulation of growth), GO:0043967 (histone H4 acetylation), GO:0043968 (histone H2A acetylation), GO:0045814 (negative regulation of gene expression, epigenetic), GO:0045892 (negative regulation of trans…			0.805993	0.508974		-0.411035	-0.0354389	0.186996		-0.666366	-0.228126	-0.160996					182.194	8.7156	78.7737	-1.46033	2.11304	17.1531	0.0014406	0.0461377	6.57761e-05	0.0956344	0.23887	-0.793725	-0.8494	0.0186875	0.00760371		8.12231	6.23888	2.35429	3.64916	4.59087	1.64801	2.94287	3.1783
ENSG00000141298	SSH2	PC	slingshot protein phosphatase 2	This gene encodes a protein tyrosine phosphatase that plays a key role in the regulation of actin filaments. The encoded protein dephosphorylates and activates cofilin, which promotes actin filament depolymerization. Alternative splicing results in multiple transcript variants. [provided by RefSeq, Aug 2013].	hsa04360 (Axon guidance), hsa04810 (Regulation of actin cytoskeleton), GO:0006470 (protein dephosphorylation), GO:0008064 (regulation of actin polymerization or depolymerization), GO:0010591 (regulation of lamellipodium assembly), GO:0030036 (actin cytoskeleton organization), GO:0035335 (peptidyl-tyrosine dephosphorylation), GO:0050770 (regulation of axonogenesis), GO:0005615 (extracellular space…			-0.278495	-0.460122		-0.56976	0.00255178	0.0152639		0.411222	0.458531	0.420809					181.853	35.2682	69.2192	0.978198	3.58225	16.7076	0.00158468	0.0481079	0.000168842	0.0765781	0.23887	0.818923	0.876976	0.0129004	0.00423599		8.94632	7.65146	6.94517	11.3006	11.4183	15.6561	16.2446	15.7738
ENSG00000133193	FAM104A	PC	family with sequence similarity 104 member A		GO:0005515 (protein binding)			1.00025	0.593048		-0.345645	-0.345645	0.00803412		-0.248771	-0.449496	-0.211772					181.683	29.8165	33.1628	-1.28552	3.27969	19.9207	0.000823711	0.0361837	3.21827e-05	0.130269	0.23887	-0.646399	-0.80917	0.0832906	0.0149816		19.5406	14.2435	6.47431	6.47431	8.8286	7.06288	5.88573	7.29831
ENSG00000109452	INPP4B	PC	inositol polyphosphate-4-phosphatase type II B	INPP4B encodes the inositol polyphosphate 4-phosphatase type II, one of the enzymes involved in phosphatidylinositol signaling pathways. This enzyme removes the phosphate group at position 4 of the inositol ring from inositol 3,4-bisphosphate. There is limited data to suggest that the human type II enzyme is subject to alternative splicing, as has been established for the type I enzyme. [provided…	hsa00562 (Inositol phosphate metabolism), hsa01100 (Metabolic pathways), hsa04070 (Phosphatidylinositol signaling system), GO:0006661 (phosphatidylinositol biosynthetic process), GO:0007165 (signal transduction), GO:0016311 (dephosphorylation), GO:0036092 (phosphatidylinositol-3-phosphate biosynthetic process), GO:0043647 (inositol phosphate metabolic process), GO:0005737 (cytoplasm), GO:0005829 …			-0.641411	-0.256655		0.0216983	0.0467935	-0.226276		0.528732	0.455659	0.0714597					181.619	12.5265	62.7878	1.16622	2.33543	14.9674	0.0023366	0.0545015	0.000338773	0.0439369	0.23887	0.944911	0.862789	0.000400878	0.00581179		2.23658	3.53144	4.70859	4.8263	3.64916	7.53374	7.06288	4.94402
ENSG00000140262	TCF12	PC	transcription factor 12	The protein encoded by this gene is a member of the basic helix-loop-helix (bHLH) E-protein family that recognizes the consensus binding site (E-box) CANNTG. This encoded protein is expressed in many tissues, among them skeletal muscle, thymus, B- and T-cells, and may participate in regulating lineage-specific gene expression through the formation of heterodimers with other bHLH E-proteins. Sever…	GO:0006357 (regulation of transcription from RNA polymerase II promoter), GO:0006366 (transcription from RNA polymerase II promoter), GO:0006955 (immune response), GO:0007517 (muscle organ development), GO:0045666 (positive regulation of neuron differentiation), GO:0045944 (positive regulation of transcription from RNA polymerase II promoter), GO:0000790 (nuclear chromatin), GO:0005634 (nucleus),…			0.480624	0.688376		-0.0402293	-0.179134	-0.249911		-0.393885	-0.186829	-0.11901					181.578	53.8726	58.659	-0.840374	4.59197	18.3972	0.00111297	0.0414133	0.000118775	0.119433	0.23887	-0.718132	-0.838002	0.0448173	0.00937894		32.9601	38.375	22.3658	20.1292	19.0698	17.0686	20.0115	21.0709
ENSG00000126524	SBDS	PC	SBDS, ribosome maturation factor	This gene encodes a member of a highly conserved protein family that exists from archaea to vertebrates and plants. The encoded protein may function in RNA metabolism. Mutations within this gene are associated with Shwachman-Bodian-Diamond syndrome. An alternative transcript has been described, but its biological nature has not been determined. This gene has a closely linked pseudogene that is di…	hsa03008 (Ribosome biogenesis in eukaryotes), GO:0001833 (inner cell mass cell proliferation), GO:0006364 (rRNA processing), GO:0007052 (mitotic spindle organization), GO:0008283 (cell proliferation), GO:0030282 (bone mineralization), GO:0030595 (leukocyte chemotaxis), GO:0042256 (mature ribosome assembly), GO:0048539 (bone marrow development), GO:0000922 (spindle pole), GO:0005634 (nucleus), GO:…			0.659027	0.563582		-0.051132	-0.12616	-0.266234		-0.554958	-0.25356	0.0294341					181.431	89.7671	29.4751	-0.819598	7.21171	19.9686	0.000816152	0.036031	3.73337e-05	0.133469	0.23887	-0.64254	-0.832244	0.085764	0.0103673		226.012	211.416	137.373	130.31	118.068	96.2906	119.127	145.378
ENSG00000160691	SHC1	PC	SHC adaptor protein 1	This gene encodes three main isoforms that differ in activities and subcellular location. While all three are adapter proteins in signal transduction pathways, the longest (p66Shc) may be involved in regulating life span and the effects of reactive oxygen species. The other two isoforms, p52Shc and p46Shc, link activated receptor tyrosine kinases to the Ras pathway by recruitment of the GRB2/SOS …	hsa01521 (EGFR tyrosine kinase inhibitor resistance), hsa01522 (Endocrine resistance), hsa04012 (ErbB signaling pathway), hsa04014 (Ras signaling pathway), hsa04062 (Chemokine signaling pathway), hsa04072 (Phospholipase D signaling pathway), hsa04510 (Focal adhesion), hsa04650 (Natural killer cell mediated cytotoxicity), hsa04722 (Neurotrophin signaling pathway), hsa04910 (Insulin signaling pathw…			0.16627	0.355877		0.0169618	0.178377	0.0524771		-0.361114	-0.254194	-0.154655					181.228	64.1673	69.9868	-0.559548	5.17134	15.7179	0.00196986	0.0507622	0.000943415	0.0621765	0.23887	-0.881917	-0.918779	0.00376031	0.00125926		39.9053	45.791	35.7853	40.2584	36.727	27.0744	29.311	31.5475
ENSG00000164830	OXR1	PC	oxidation resistance 1		GO:0006979 (response to oxidative stress), GO:0007628 (adult walking behavior), GO:0043524 (negative regulation of neuron apoptotic process), GO:0051402 (neuron apoptotic process), GO:0055114 (oxidation-reduction process), GO:0071447 (cellular response to hydroperoxide), GO:1902083 (negative regulation of peptidyl-cysteine S-nitrosylation), GO:1903204 (negative regulation of oxidative stress-indu…			0.146586	0.60245		0.162268	0.177782	-0.130726		-0.271108	-0.426637	-0.260615					180.971	46.6743	75.8359	-0.795334	4.18366	16.5857	0.001627	0.0485085	0.000374488	0.0765781	0.23887	-0.818923	-0.851827	0.0129004	0.00725586		19.5406	27.5452	19.7761	20.0115	15.7738	14.1258	12.4778	14.2435
ENSG00000248487	ABHD14A	PC	abhydrolase domain containing 14A		GO:0005737 (cytoplasm), GO:0016021 (integral component of membrane), GO:0070062 (extracellular vesicular exosome), GO:0016787 (hydrolase activity)			0.383059	0.191828		0.0040354	0.085782	0.0040354		-0.189543	-0.297033	-0.182163					180.851	54.4372	17.3445	-0.553746	4.62589	14.8042	0.00242664	0.0556388	0.00150918	0.0423134	0.23887	-0.950586	-0.946082	0.000290566	0.000376188		32.1361	27.8984	24.2492	25.7795	24.2492	20.9532	19.3052	21.0709
ENSG00000273345	AC104109.4	PT						0.464465	0.81397		-0.271779	-0.0285021	-0.158565		-0.605727	-0.179127	-0.0347342					180.805	74.0561	48.9281	-0.890537	5.81875	18.2799	0.00113982	0.0414133	7.43059e-05	0.119433	0.23887	-0.718132	-0.806619	0.0448173	0.0155585		74.8665	95.9375	44.143	52.6185	47.9099	34.6081	47.2036	52.383
ENSG00000266921	AC006213.1	As						0.636487	0.370175		0.183063	-0.195514	-0.00644552		-0.591532	-0.284799	-0.111434					180.75	13.2763	81.588	-1.1437	2.37689	15.8263	0.00192268	0.0507622	0.000201527	0.0685251	0.23887	-0.869318	-0.88182	0.00504681	0.00376927		8.47546	6.70974	5.65031	3.88458	4.70859	2.47201	3.53144	4.23773
ENSG00000139154	AEBP2	PC	AE binding protein 2		GO:0000122 (negative regulation of transcription from RNA polymerase II promoter), GO:0006351 (transcription, DNA-templated), GO:0016569 (covalent chromatin modification), GO:0045814 (negative regulation of gene expression, epigenetic), GO:0005634 (nucleus), GO:0005654 (nucleoplasm), GO:0035098 (ESC/E(Z) complex), GO:0000978 (RNA polymerase II core promoter proximal region sequence-specific DNA b…			0.540985	0.506385		0.114484	-0.322188	-0.0612077		-0.398816	-0.297524	-0.0821182					180.63	42.9164	73.1981	-0.84576	3.98214	16.9322	0.00151003	0.0475912	0.000228502	0.0956344	0.23887	-0.793725	-0.870193	0.0186875	0.00494955		22.8367	22.2481	16.4801	11.6538	14.3612	10.9475	11.8892	14.1258
ENSG00000198899	MT-ATP6	PC	mitochondrially encoded ATP synthase membrane subunit 6		hsa00190 (Oxidative phosphorylation), hsa01100 (Metabolic pathways), hsa04714 (Thermogenesis), hsa05010 (Alzheimer disease), hsa05012 (Parkinson disease), hsa05016 (Huntington disease), R-HSA-1428517 (Homo sapiens: The citric acid (TCA) cycle and respiratory electron transport), R-HSA-1430728 (Homo sapiens: Metabolism), R-HSA-163200 (Homo sapiens: Respiratory electron transport, ATP synthesis by …			0.672882	0.949854		-0.3528	-0.0461978	-0.413297		-0.377209	-0.286277	-0.146955					180.416	99.9118	8.79577	-1.01635	12.7798	21.7391	0.000586435	0.0327479	1.14957e-05	0.133469	0.23887	-0.566947	-0.80539	0.1428	0.0158414		10525.9	12754.2	5169.09	6393.56	4956.73	5082.33	5413.11	5962.13
ENSG00000141627	DYM	PC	dymeclin	This gene encodes a protein which is necessary for normal skeletal development and brain function. Mutations in this gene are associated with two types of recessive osteochondrodysplasia, Dyggve-Melchior-Clausen (DMC) dysplasia and Smith-McCort (SMC) dysplasia, which involve both skeletal defects and mental retardation. [provided by RefSeq, Jul 2008]. Publication Note: This RefSeq record includes…	GO:0007030 (Golgi organization), GO:0060348 (bone development), GO:0005737 (cytoplasm), GO:0005794 (Golgi apparatus), GO:0016020 (membrane), GO:0005515 (protein binding), GO:0019899 (enzyme binding)			-0.157433	-0.577817		-0.398469	-0.00700059	-0.0802568		0.484575	0.4947	0.241701					180.412	32.0924	18.3061	0.956617	3.40121	15.6111	0.00201771	0.0513078	0.000288773	0.0621765	0.23887	0.881917	0.863917	0.00376031	0.0056746		8.71089	6.00345	7.06288	9.88803	9.29946	14.7143	14.8321	12.1246
ENSG00000156642	NPTN	PC	neuroplastin	This gene encodes a type I transmembrane protein belonging to the Ig superfamily. The protein is believed to be involved in cell-cell interactions or cell-substrate interactions. Alternative splicing results in multiple transcript variants. [provided by RefSeq, May 2009].	GO:0001934 (positive regulation of protein phosphorylation), GO:0007156 (homophilic cell adhesion via plasma membrane adhesion molecules), GO:0007169 (transmembrane receptor protein tyrosine kinase signaling pathway), GO:0007204 (positive regulation of cytosolic calcium ion concentration), GO:0008542 (visual learning), GO:0010976 (positive regulation of neuron projection development), GO:0018108 …			0.166728	0.447166		0.0122629	0.0275623	-0.0635213		-0.287541	-0.239135	-0.0635213					179.944	73.0505	35.5624	-0.516063	5.74467	15.1534	0.00223873	0.0531999	0.00113792	0.0537348	0.23887	-0.912563	-0.872149	0.00156352	0.00473638		59.4459	72.63	53.207	53.7956	50.3819	42.8481	44.3784	50.3819
ENSG00000149177	PTPRJ	PC	protein tyrosine phosphatase, receptor type J	The protein encoded by this gene is a member of the protein tyrosine phosphatase (PTP) family. PTPs are known to be signaling molecules that regulate a variety of cellular processes, including cell growth, differentiation, mitotic cycle, and oncogenic transformation. This PTP possesses an extracellular region containing five fibronectin type III repeats, a single transmembrane region, and a singl…	hsa04520 (Adherens junction), GO:0008285 (negative regulation of cell proliferation), GO:0010642 (negative regulation of platelet-derived growth factor receptor signaling pathway), GO:0030155 (regulation of cell adhesion), GO:0030308 (negative regulation of cell growth), GO:0030336 (negative regulation of cell migration), GO:0035335 (peptidyl-tyrosine dephosphorylation), GO:0042059 (negative regu…			-0.195391	-0.361135		0.0601771	-0.0670623	-0.0824929		0.301192	0.137689	0.207023					179.529	62.2618	89.034	0.522965	5.05993	14.7071	0.00248212	0.0561496	0.00161169	0.0439369	0.23887	0.944911	0.936776	0.000400878	0.000602235		28.3692	25.0732	34.255	31.1944	30.8413	40.847	36.2561	38.1396
ENSG00000054118	THRAP3	PC	thyroid hormone receptor associated protein 3		GO:0000381 (regulation of alternative mRNA splicing, via spliceosome), GO:0000956 (nuclear-transcribed mRNA catabolic process), GO:0006367 (transcription initiation from RNA polymerase II promoter), GO:0006397 (mRNA processing), GO:0007623 (circadian rhythm), GO:0008380 (RNA splicing), GO:0030518 (intracellular steroid hormone receptor signaling pathway), GO:0030521 (androgen receptor signaling p…			-0.103877	-0.364498		-0.0918329	-0.137085	-0.0330756		0.379084	0.265974	0.0853104					179.37	85.2858	77.9885	0.501303	6.71608	15.475	0.00208062	0.052105	0.000884448	0.0621765	0.23887	0.881917	0.853104	0.00376031	0.00707712		96.2906	80.046	97.1146	94.054	101.235	135.372	125.013	110.063
ENSG00000118200	CAMSAP2	PC	calmodulin regulated spectrin associated protein family member 2		GO:0000226 (microtubule cytoskeleton organization), GO:0031175 (neuron projection development), GO:0033043 (regulation of organelle organization), GO:0005813 (centrosome), GO:0005829 (cytosol), GO:1990752 (NA), GO:0005515 (protein binding), GO:0005516 (calmodulin binding), GO:0030507 (spectrin binding), GO:0051011 (microtubule minus-end binding)			0.57186	0.864053		-0.0656104	-0.0886958	-0.261547		-0.667909	-0.428212	0.0760612					179.011	40.958	93.3039	-1.12989	3.87337	18.0087	0.00120486	0.0424729	7.52543e-05	0.119433	0.23887	-0.718132	-0.828679	0.0448173	0.0110112		21.0709	26.2504	12.8309	12.5955	10.9475	7.76917	9.53489	14.3612
ENSG00000117505	DR1	PC	down-regulator of transcription 1	This gene encodes a TBP- (TATA box-binding protein) associated phosphoprotein that represses both basal and activated levels of transcription. The encoded protein is phosphorylated in vivo and this phosphorylation affects its interaction with TBP. This protein contains a histone fold motif at the amino terminus, a TBP-binding domain, and a glutamine- and alanine-rich region. The binding of DR1 re…	GO:0000122 (negative regulation of transcription from RNA polymerase II promoter), GO:0006351 (transcription, DNA-templated), GO:0043966 (histone H3 acetylation), GO:0005634 (nucleus), GO:0005671 (Ada2/Gcn5/Ada3 transcription activator complex), GO:0003677 (DNA binding), GO:0003714 (transcription corepressor activity), GO:0005515 (protein binding), GO:0008134 (transcription factor binding), GO:00…			0.491962	0.458158		-0.0511074	-0.0161302	-0.142451		-0.579676	-0.105216	-0.0555398					178.841	65.9933	96.921	-0.712691	5.28514	16.6806	0.00159393	0.0481079	0.000260863	0.0956344	0.23887	-0.793725	-0.863616	0.0186875	0.00571103		53.9133	52.6185	36.3738	37.3156	34.0195	24.6024	34.9613	36.2561
ENSG00000165689	ENTR1	PC	endosome associated trafficking regulator 1		GO:0007049 (cell cycle), GO:0015031 (protein transport), GO:0032465 (regulation of cytokinesis), GO:0051301 (cell division), GO:1990126 (retrograde transport, endosome to plasma membrane), GO:0005768 (endosome), GO:0005769 (early endosome), GO:0030496 (midbody), GO:0030904 (retromer complex), GO:0055037 (recycling endosome), GO:0005515 (protein binding)			-0.623761	-0.18518		0.00688381	0.0392149	0.0979495		0.29658	0.313201	0.0551127					178.737	81.6249	27.1901	0.607214	6.36458	15.5608	0.00204068	0.0516503	0.000544654	0.0685251	0.23887	0.869318	0.86697	0.00504681	0.00531401		51.6768	70.7465	81.1054	82.9889	86.5203	99.5866	100.764	83.9306
ENSG00000174953	DHX36	PC	DEAH-box helicase 36	This gene is a member of the DEAH-box family of RNA-dependent NTPases which are named after the conserved amino acid sequence Asp-Glu-Ala-His in motif II. The protein encoded by this gene has been shown to enhance the deadenylation and decay of mRNAs with 3_-UTR AU-rich elements (ARE-mRNA). The protein has also been shown to resolve into single strands the highly stable tetramolecular DNA configu…	hsa03018 (RNA degradation), GO:0001503 (ossification), GO:0006351 (transcription, DNA-templated), GO:0006396 (RNA processing), GO:0009615 (response to virus), GO:0010501 (RNA secondary structure unwinding), GO:0032206 (positive regulation of telomere maintenance), GO:0032481 (positive regulation of type I interferon production), GO:0043330 (response to exogenous dsRNA), GO:0045944 (positive regul…			0.639473	0.47945		-0.126845	-0.206283	-0.0887081		-0.442362	-0.166017	-0.0887081					178.062	57.6041	65.4786	-0.801444	4.80211	18.5212	0.00108537	0.0412265	0.000119691	0.12489	0.23887	-0.684422	-0.846707	0.0611479	0.00800187		42.8481	38.1396	24.3669	22.9544	25.0732	19.1875	23.6607	25.0732
ENSG00000114354	TFG	PC	TRK-fused gene	There are several documented fusion oncoproteins encoded partially by this gene. This gene also participates in several oncogenic rearrangements resulting in anaplastic lymphoma and mixoid chondrosarcoma, and may play a role in the NF-kappaB pathway. Multiple transcript variants have been found for this gene. [provided by RefSeq, Sep 2010].	hsa05200 (Pathways in cancer), hsa05216 (Thyroid cancer), GO:0006888 (ER to Golgi vesicle-mediated transport), GO:0007165 (signal transduction), GO:0043123 (positive regulation of I-kappaB kinase/NF-kappaB signaling), GO:0048208 (COPII vesicle coating), GO:0000139 (Golgi membrane), GO:0005737 (cytoplasm), GO:0005829 (cytosol), GO:0070062 (extracellular vesicular exosome), GO:0070971 (endoplasmic …			0.263626	0.389523		-0.0215044	-0.0941002	-0.123906		-0.148494	-0.122473	-0.142671					177.982	87.9764	55.6771	-0.447998	7.00579	15.4616	0.00208692	0.052105	0.00112821	0.0685251	0.23887	-0.869318	-0.867547	0.00504681	0.00524756		152.911	167.037	125.131	118.892	116.42	114.419	116.538	114.89
ENSG00000109111	SUPT6H	PC	SPT6 homolog, histone chaperone		GO:0006338 (chromatin remodeling), GO:0006342 (chromatin silencing), GO:0006355 (regulation of transcription, DNA-templated), GO:0006366 (transcription from RNA polymerase II promoter), GO:0006368 (transcription elongation from RNA polymerase II promoter), GO:0006397 (mRNA processing), GO:0008380 (RNA splicing), GO:0010793 (regulation of mRNA export from nucleus), GO:0016032 (viral process), GO:0…			-0.361607	-0.405165		0.109977	-0.0279168	0.0667903		0.331822	0.239374	0.0467241					177.975	66.2403	60.5734	0.600309	5.30353	16.559	0.00163644	0.0485085	0.00061524	0.0956344	0.23887	0.793725	0.898945	0.0186875	0.00238838		29.6641	28.7224	41.9064	37.9041	40.6116	49.2047	46.0264	40.023
ENSG00000144747	TMF1	PC	TATA element modulatory factor 1		GO:0001675 (acrosome assembly), GO:0001819 (positive regulation of cytokine production), GO:0006355 (regulation of transcription, DNA-templated), GO:0006366 (transcription from RNA polymerase II promoter), GO:0007289 (spermatid nucleus differentiation), GO:0010629 (negative regulation of gene expression), GO:0030317 (sperm motility), GO:0032275 (luteinizing hormone secretion), GO:0033327 (Leydig …			0.705771	0.668403		-0.0602021	-0.00549372	-0.261846		-0.858922	-0.168732	-0.0189776					177.894	54.8783	87.049	-1.03447	4.64553	17.8404	0.00124742	0.042796	7.76023e-05	0.119433	0.23887	-0.718132	-0.851878	0.0448173	0.00724874		39.4344	38.375	22.3658	23.3075	19.1875	12.0069	20.6001	23.0721
ENSG00000234797	RPS3AP6	p_Pg	ribosomal protein S3A pseudogene 6					0.793176	0.1268		0.0294815	0.0626558	0.0950844		-0.589604	-0.442714	-0.0748798					177.893	2.82287	12.8716	-1.40276	1.75886	14.5042	0.00260303	0.0571858	0.000326759	0.0439369	0.23887	-0.944911	-0.804673	0.000400878	0.016008		6.59202	3.41373	3.06058	3.1783	3.29601	1.29486	1.64801	2.70744
ENSG00000135597	REPS1	PC	RALBP1 associated Eps domain containing 1		GO:0006898 (receptor-mediated endocytosis), GO:0061024 (membrane organization), GO:0005829 (cytosol), GO:0005886 (plasma membrane), GO:0005905 (coated pit), GO:0005509 (calcium ion binding), GO:0005515 (protein binding), GO:0017124 (SH3 domain binding), R-HSA-199991 (Homo sapiens: Membrane Trafficking), R-HSA-5653656 (Homo sapiens: Vesicle-mediated transport), R-HSA-8856825 (Homo sapiens: Cargo r…			0.678725	0.449814		-0.173198	-0.250645	-0.0713154		-0.240076	-0.153229	-0.240076					177.406	64.9876	65.6903	-0.775958	5.22738	19.224	0.000943404	0.0389034	9.10775e-05	0.130269	0.23887	-0.646399	-0.830999	0.0832906	0.0105894		58.9751	50.0287	31.783	30.0172	34.255	30.2527	32.2538	30.2527
ENSG00000137288	UQCC2	PC	ubiquinol-cytochrome c reductase complex assembly factor 2	This gene encodes a nucleoid protein localized to the mitochondria inner membrane. The encoded protein affects regulation of insulin secretion, mitochondrial ATP production, and myogenesis through modulation of mitochondrial respiratory chain activity. [provided by RefSeq, Oct 2012].	GO:0002082 (regulation of oxidative phosphorylation), GO:0034551 (mitochondrial respiratory chain complex III assembly), GO:0050796 (regulation of insulin secretion), GO:0070131 (positive regulation of mitochondrial translation), GO:1903364 (positive regulation of cellular protein catabolic process), GO:2001014 (regulation of skeletal muscle cell differentiation), GO:0005739 (mitochondrion), GO:0…			-0.312224	-0.504308		0.117075	0.0662916	0.131678		0.235373	0.147572	0.118542					177.247	85.4711	61.2439	0.544714	6.73295	15.3651	0.00213314	0.0524539	0.000796054	0.0685251	0.23887	0.869318	0.874513	0.00504681	0.00448685		83.9306	73.2185	113.712	109.71	114.89	123.6	116.184	113.83
ENSG00000164609	SLU7	PC	SLU7 homolog, splicing factor	Pre-mRNA splicing occurs in two sequential transesterification steps. The protein encoded by this gene is a splicing factor that has been found to be essential during the second catalytic step in the pre-mRNA splicing process. It associates with the spliceosome and contains a zinc knuckle motif that is found in other splicing factors and is involved in protein-nucleic acid and protein-protein int…	hsa03040 (Spliceosome), GO:0000375 (RNA splicing, via transesterification reactions), GO:0000380 (alternative mRNA splicing, via spliceosome), GO:0000389 (mRNA 3'-splice site recognition), GO:0000398 (mRNA splicing, via spliceosome), GO:0006369 (termination of RNA polymerase II transcription), GO:0006405 (RNA export from nucleus), GO:0006406 (mRNA export from nucleus), GO:0006886 (intracellular p…			1.04954	1.19764		-0.475522	-0.459579	-0.280855		-0.0604455	-0.41278	-0.557993					177.122	41.3638	22.0379	-1.57836	3.89208	21.1504	0.000653198	0.0334263	1.14916e-05	0.133469	0.23887	-0.566947	-0.80596	0.1428	0.0157097		28.487	31.783	8.59317	8.71089	10.1235	12.1246	9.06403	8.0046
ENSG00000109881	CCDC34	PC	coiled-coil domain containing 34					0.757884	0.883865		-0.202394	-0.197176	-0.440563		-0.333644	-0.356728	-0.111243					177.056	65.4111	60.7675	-1.0779	5.24876	21.1388	0.000654608	0.0334263	1.67503e-05	0.133469	0.23887	-0.566947	-0.81641	0.1428	0.013418		61.2116	66.9797	30.4881	30.6058	25.5441	27.663	27.1921	32.607
ENSG00000225420	AC104134.1	As						0.25042	0.630718		-0.112182	0.191998	-0.0686763		-0.460145	-0.097534	-0.334599					176.568	33.3716	64.667	-0.868652	3.46411	15.2761	0.00217678	0.0526368	0.000475316	0.0685251	0.23887	-0.869318	-0.855837	0.00504681	0.00670386		12.8309	17.3041	9.53489	12.2423	9.88803	7.06288	9.65261	7.88688
ENSG00000179564	LSMEM2	PC	leucine rich single-pass membrane protein 2		GO:0016021 (integral component of membrane), GO:0005515 (protein binding)			-0.901125	-0.571605		0.186387	0.141014	0.298083		0.44346	0.190846	0.212941					176.459	61.9795	53.3657	0.987938	5.04715	16.347	0.00171378	0.0491833	0.000175512	0.0956344	0.23887	0.793725	0.849009	0.0186875	0.0076607		15.8915	20.4824	36.0207	34.8436	39.0813	43.4367	36.1384	36.727
ENSG00000137207	YIPF3	PC	Yip1 domain family member 3		GO:0030154 (cell differentiation), GO:0005794 (Golgi apparatus), GO:0005886 (plasma membrane), GO:0016021 (integral component of membrane), GO:0030133 (transport vesicle), GO:0043231 (intracellular membrane-bounded organelle), GO:0005515 (protein binding)			0.172599	0.249131		-0.0823936	0.0950551	0.0371609		-0.136462	-0.167545	-0.167545					176.16	89.4584	17.9885	-0.372209	7.17737	14.2251	0.00278078	0.0591425	0.00292393	0.0423134	0.23887	-0.950586	-0.941675	0.000290566	0.000474571		162.211	171.157	135.607	153.618	147.497	130.546	127.72	127.72
ENSG00000266469	AC005288.1	As						0.477033	0.643937		-0.228562	-0.0710092	-0.0910483		-0.405454	-0.273653	-0.0512446					176.036	44.4866	15.6948	-0.854593	4.06311	17.5615	0.0013219	0.0440736	0.000175685	0.119433	0.23887	-0.718132	-0.854303	0.0448173	0.00691174		22.9544	26.0149	13.3018	15.0675	14.8321	11.536	12.8309	15.3029
ENSG00000274211	SOCS7	PC	suppressor of cytokine signaling 7		hsa04630 (JAK-STAT signaling pathway), hsa04917 (Prolactin signaling pathway), GO:0006469 (negative regulation of protein kinase activity), GO:0008150 (biological_process), GO:0008286 (insulin receptor signaling pathway), GO:0016567 (protein ubiquitination), GO:0019221 (cytokine-mediated signaling pathway), GO:0021819 (layer formation in cerebral cortex), GO:0021942 (radial glia guided migration …			-0.493528	-0.542446		-0.0965813	0.0753914	0.243532		0.300121	0.313928	0.199584					176.025	25.9174	90.569	0.949225	3.07324	15.2051	0.00221237	0.053022	0.000514841	0.0685251	0.23887	0.869318	0.916117	0.00504681	0.00138431		5.06173	4.8263	7.29831	8.47546	9.77032	10.2412	10.3589	9.41718
ENSG00000112306	RPS12	PC	ribosomal protein S12	Ribosomes, the organelles that catalyze protein synthesis, consist of a small 40S subunit and a large 60S subunit. Together these subunits are composed of 4 RNA species and approximately 80 structurally distinct proteins. This gene encodes a ribosomal protein that is a component of the 40S subunit. The protein belongs to the S12E family of ribosomal proteins. It is located in the cytoplasm. Incre…	hsa03010 (Ribosome), GO:0000184 (nuclear-transcribed mRNA catabolic process, nonsense-mediated decay), GO:0006364 (rRNA processing), GO:0006412 (translation), GO:0006413 (translational initiation), GO:0006614 (SRP-dependent cotranslational protein targeting to membrane), GO:0019083 (viral transcription), GO:0005654 (nucleoplasm), GO:0005829 (cytosol), GO:0016020 (membrane), GO:0022627 (cytosolic …			-0.0910239	-0.533884		0.0394705	-0.117869	0.024951		0.403335	0.142111	0.132908					175.915	98.9061	7.16365	0.525789	9.994	15.0261	0.00230516	0.0541022	0.000734652	0.0621765	0.23887	0.881917	0.831241	0.00376031	0.010546		943.012	693.222	1032.48	925.591	1022.12	1329.23	1108.75	1101.69
ENSG00000119900	OGFRL1	PC	opioid growth factor receptor like 1		GO:0016020 (membrane), GO:0004872 (receptor activity)			0.566656	0.510385		-0.234856	0.00511578	-0.0787226		-0.248663	-0.0302201	-0.489695					174.635	37.8705	97.5739	-0.867004	3.72394	16.093	0.00181216	0.0501041	0.000284687	0.0956344	0.23887	-0.793725	-0.865703	0.0186875	0.00546181		19.5406	18.7166	10.3589	12.5955	11.7715	10.2412	12.2423	8.35774
ENSG00000153827	TRIP12	PC	thyroid hormone receptor interactor 12		hsa04120 (Ubiquitin mediated proteolysis), GO:0000209 (protein polyubiquitination), GO:0006281 (DNA repair), GO:0006974 (cellular response to DNA damage stimulus), GO:0009790 (embryo development), GO:0042787 (protein ubiquitination involved in ubiquitin-dependent protein catabolic process), GO:1901315 (negative regulation of histone H2A K63-linked ubiquitination), GO:2000780 (negative regulation …			0.397961	0.375061		-0.0412661	-0.0697844	-0.0988778		-0.327075	-0.230252	-0.00576678					174.595	77.7523	73.3039	-0.560197	6.07292	17.3459	0.00138306	0.0453132	0.00038853	0.119433	0.23887	-0.718132	-0.877778	0.0448173	0.00415629		87.6974	86.2849	64.1545	62.8596	61.5648	52.2653	56.0322	65.8025
ENSG00000162929	KIAA1841	PC	KIAA1841					-0.541674	-0.404128		-0.0221576	-0.0561127	0.19548		0.359009	0.333009	0.136574					174.503	3.60797	83.7583	1.21182	1.80211	15.0065	0.0023156	0.0542349	0.000558253	0.0685251	0.23887	0.869318	0.922739	0.00504681	0.00108722		1.53029	1.88344	3.06058	2.94287	3.88458	4.59087	4.47316	3.64916
ENSG00000213341	CHUK	PC	conserved helix-loop-helix ubiquitous kinase	This gene encodes a member of the serine/threonine protein kinase family. The encoded protein, a component of a cytokine-activated protein complex that is an inhibitor of the essential transcription factor NF-kappa-B complex, phosphorylates sites that trigger the degradation of the inhibitor via the ubiquination pathway, thereby activating the transcription factor. [provided by RefSeq, Jul 2008].…	hsa01523 (Antifolate resistance), hsa04010 (MAPK signaling pathway), hsa04014 (Ras signaling pathway), hsa04062 (Chemokine signaling pathway), hsa04064 (NF-kappa B signaling pathway), hsa04068 (FoxO signaling pathway), hsa04150 (mTOR signaling pathway), hsa04151 (PI3K-Akt signaling pathway), hsa04210 (Apoptosis), hsa04380 (Osteoclast differentiation), hsa04620 (Toll-like receptor signaling pathwa…			-0.53881	-0.154992		-0.186937	-0.165562	0.0137741		0.521802	0.354337	0.156387					174.439	44.3278	82.0997	0.795496	4.05547	15.6912	0.00198169	0.0509398	0.000456147	0.0765781	0.23887	0.818923	0.861529	0.0129004	0.00596746		10.3589	14.1258	13.7726	14.008	16.1269	23.7784	20.9532	18.0103
ENSG00000153046	CDYL	PC	chromodomain Y like	Chromodomain Y is a primate-specific Y-chromosomal gene family expressed exclusively in the testis and implicated in infertility. Although the Y-linked genes are testis-specific, this autosomal gene is ubiquitously expressed. The Y-linked genes arose by retrotransposition of an mRNA from this gene, followed by amplification of the retroposed gene. Proteins encoded by this gene superfamily possess…	GO:0006351 (transcription, DNA-templated), GO:0006355 (regulation of transcription, DNA-templated), GO:0007283 (spermatogenesis), GO:0016573 (histone acetylation), GO:1903507 (negative regulation of nucleic acid-templated transcription), GO:0005634 (nucleus), GO:0005654 (nucleoplasm), GO:0016604 (nuclear body), GO:0016607 (nuclear speck), GO:0003714 (transcription corepressor activity), GO:000440…			-0.198612	-0.693423		0.204771	-0.270171	-0.130435		0.608792	0.239539	0.239539					174.313	42.5018	63.9612	0.913931	3.95913	14.7521	0.00245622	0.0560235	0.000454085	0.0601301	0.23887	0.887214	0.829306	0.00329023	0.0108962		12.5955	8.35774	17.3041	11.8892	13.3018	23.5429	17.7749	17.7749
ENSG00000185808	PIGP	PC	phosphatidylinositol glycan anchor biosynthesis class P	This gene encodes an enzyme involved in the first step of glycosylphosphatidylinositol (GPI)-anchor biosynthesis. The GPI-anchor is a glycolipid found on many blood cells that serves to anchor proteins to the cell surface. The encoded protein is a component of the GPI-N-acetylglucosaminyltransferase complex that catalyzes the transfer of N-acetylglucosamine (GlcNAc) from UDP-GlcNAc to phosphatidy…	hsa00563 (Glycosylphosphatidylinositol (GPI)-anchor biosynthesis), hsa01100 (Metabolic pathways), GO:0016254 (preassembly of GPI anchor in ER membrane), GO:0000506 (glycosylphosphatidylinositol-N-acetylglucosaminyltransferase (GPI-GnT) complex), GO:0005789 (endoplasmic reticulum membrane), GO:0017176 (phosphatidylinositol N-acetylglucosaminyltransferase activity), R-HSA-162710 (Homo sapiens: Synt…			0.351122	0.386456		-0.044198	-0.0520605	-0.0839463		-0.273152	-0.184063	-0.100157					174.032	50.15	68.3811	-0.583309	4.38199	14.0284	0.00291475	0.0604469	0.00156492	0.0439369	0.23887	-0.944911	-0.91574	0.000400878	0.00140267		26.4858	27.1921	19.6584	19.5406	19.0698	16.4801	17.6572	18.8344
ENSG00000165660	ABRAXAS2	PC	abraxas 2, BRISC complex subunit		GO:0000278 (mitotic cell cycle), GO:0002931 (response to ischemia), GO:0007059 (chromosome segregation), GO:0008608 (attachment of spindle microtubules to kinetochore), GO:0016579 (protein deubiquitination), GO:0051301 (cell division), GO:0070536 (protein K63-linked deubiquitination), GO:0090307 (spindle assembly involved in mitosis), GO:0005737 (cytoplasm), GO:0005813 (centrosome), GO:0005829 (c…			0.31932	0.722712		-0.0906059	0.35002	-0.313032		-0.36195	-0.337283	-0.289181					173.702	22.1771	89.925	-1.09405	2.87626	15.7748	0.00194494	0.0507622	0.000284512	0.102512	0.23887	-0.806324	-0.828929	0.0156261	0.0109652		8.94632	12.4778	6.23888	9.18175	5.06173	4.8263	4.94402	5.17945
ENSG00000176788	BASP1	PC	brain abundant membrane attached signal protein 1	This gene encodes a membrane bound protein with several transient phosphorylation sites and PEST motifs. Conservation of proteins with PEST sequences among different species supports their functional significance. PEST sequences typically occur in proteins with high turnover rates. Immunological characteristics of this protein are species specific. This protein also undergoes N-terminal myristoyl…	GO:0007356 (thorax and anterior abdomen determination), GO:0008406 (gonad development), GO:0021762 (substantia nigra development), GO:0045892 (negative regulation of transcription, DNA-templated), GO:0060231 (mesenchymal to epithelial transition), GO:0060421 (positive regulation of heart growth), GO:0060539 (diaphragm development), GO:0072075 (metanephric mesenchyme development), GO:0072112 (glom…			0.681653	0.640718		-0.239811	-0.136977	-0.308157		-0.329767	-0.108191	-0.199468					173.569	92.3959	44.2258	-0.821878	7.5848	20.521	0.000734675	0.0345687	2.78702e-05	0.133469	0.23887	-0.566947	-0.816376	0.1428	0.0134251		296.759	288.401	155.737	167.39	148.438	146.202	170.804	160.21
ENSG00000275180	AC048341.2	lincRNA						-0.316907	-0.316907		-0.20008	-0.106961	-0.184137		0.734406	0.262306	0.128278					173.416	32.6747	3.44067	0.898508	3.42907	13.8893	0.00301399	0.0618186	0.000818412	0.0423134	0.23887	0.950586	0.77484	0.000290566	0.0239353		7.76917	7.76917	8.59317	9.29946	8.71089	18.2458	12.5955	11.3006
ENSG00000147687	TATDN1	PC	TatD DNase domain containing 1		GO:0006308 (DNA catabolic process), GO:0090305 (nucleic acid phosphodiester bond hydrolysis), GO:0005654 (nucleoplasm), GO:0004536 (deoxyribonuclease activity), GO:0005515 (protein binding), GO:0016888 (endodeoxyribonuclease activity, producing 5'-phosphomonoesters), GO:0046872 (metal ion binding)			0.913448	0.537472		-0.366699	-0.267159	-0.0256482		0.0118279	-0.422736	-0.380506					173.08	61.1944	13.6833	-0.994264	4.99485	17.1203	0.00145066	0.0463232	0.000109862	0.119433	0.23887	-0.718132	-0.786645	0.0448173	0.0205605		58.0333	44.2607	22.7189	24.4847	29.311	30.135	21.7772	22.4835
ENSG00000101160	CTSZ	PC	cathepsin Z	The protein encoded by this gene is a lysosomal cysteine proteinase and member of the peptidase C1 family. It exhibits both carboxy-monopeptidase and carboxy-dipeptidase activities. The encoded protein has also been known as cathepsin X and cathepsin P. This gene is expressed ubiquitously in cancer cell lines and primary tumors and, like other members of this family, may be involved in tumorigene…	hsa04142 (Lysosome), hsa04210 (Apoptosis), GO:0002003 (angiotensin maturation), GO:0006508 (proteolysis), GO:0006888 (ER to Golgi vesicle-mediated transport), GO:0010757 (negative regulation of plasminogen activation), GO:0010977 (negative regulation of neuron projection development), GO:0032091 (negative regulation of protein binding), GO:0043312 (neutrophil degranulation), GO:0043525 (positive …			0.264519	0.442078		-0.125669	-0.100221	-0.0280112		-0.0969697	-0.236668	-0.119059					172.658	93.6309	18.562	-0.483346	7.81121	17.0576	0.00147014	0.0466822	0.000491952	0.119433	0.23887	-0.718132	-0.850616	0.0448173	0.00742815		266.742	301.938	203.058	206.707	217.419	207.178	187.873	204
ENSG00000198954	KIF1BP	PC	KIF1 binding protein	This gene encodes a kinesin family member 1 binding protein that is characterized by two tetratrico peptide repeats. The encoded protein localizes to the mitochondria and may be involved in regulating transport of the mitochondria. Mutations in this gene are associated with Goldberg-Shprintzen megacolon syndrome. [provided by RefSeq, Mar 2010].	GO:0006839 (mitochondrial transport), GO:0007399 (nervous system development), GO:0030154 (cell differentiation), GO:0005739 (mitochondrion), GO:0005856 (cytoskeleton), GO:0005515 (protein binding), GO:0019894 (kinesin binding)			0.503536	0.373137		-0.143837	-0.0814384	-0.15183		-0.230057	-0.184252	-0.0852603					172.656	69.7248	76.2241	-0.594997	5.52762	15.8185	0.00192604	0.0507622	0.00057278	0.0956344	0.23887	-0.793725	-0.843793	0.0186875	0.00844746		64.7431	58.9751	40.6116	42.495	40.3761	38.1396	39.4344	42.3773
ENSG00000170606	HSPA4	PC	heat shock protein family A (Hsp70) member 4		hsa04530 (Tight junction), hsa04612 (Antigen processing and presentation), GO:0006986 (response to unfolded protein), GO:0045040 (protein import into mitochondrial outer membrane), GO:0051131 (chaperone-mediated protein complex assembly), GO:0005829 (cytosol), GO:0070062 (extracellular vesicular exosome), GO:0005515 (protein binding), GO:0005524 (ATP binding), R-HSA-2262752 (Homo sapiens: Cellula…			0.559479	0.404848		-0.0768781	-0.169543	-0.211546		-0.249154	-0.181163	-0.0760435					172.612	97.1066	76.8505	-0.611641	8.76974	18.5348	0.00108241	0.0412265	0.000132867	0.133469	0.23887	-0.64254	-0.820296	0.085764	0.0126232		630.362	566.09	404.821	379.512	368.565	359.03	376.452	405.056
ENSG00000261040	WFDC21P	transcribed_unitary_pseudogene	WAP four-disulfide core domain 21, pseudogene					-0.461417	-0.292987		-0.0379684	0.0825289	0.0162941		0.516521	-0.00811793	0.185146					172.491	78.2375	4.39347	0.626497	6.10627	15.7957	0.00193588	0.0507622	0.000520906	0.0956344	0.23887	0.793725	0.808451	0.0186875	0.0151428		48.3807	54.6196	65.5671	71.4528	68.1568	97.2323	66.9797	76.8677
ENSG00000279059	AC007485.2	TEC						0.831969	0.514091		0.0647476	0.0647476	-0.295881		-0.6585	-0.613406	0.0922309					172.205	32.1895	61.7203	-1.2038	3.40922	16.914	0.00151591	0.0475912	0.000108055	0.116414	0.23887	-0.722446	-0.841077	0.0429448	0.00887656		18.8344	14.7143	10.2412	10.2412	7.53374	5.41488	5.65031	10.4766
ENSG00000041802	LSG1	PC	large 60S subunit nuclear export GTPase 1	This gene encodes a protein related to the yeast large subunit GTPase 1. The encoded protein is necessary for cell viability and may localize in the endoplasmic reticulum, nucleus and cytoplasm.[provided by RefSeq, Feb 2009]. Sequence Note: This RefSeq record was created from transcript and genomic sequence data to make the sequence consistent with the reference genome assembly. The genomic coord…	hsa03008 (Ribosome biogenesis in eukaryotes), GO:0015031 (protein transport), GO:0051168 (nuclear export), GO:0005634 (nucleus), GO:0005783 (endoplasmic reticulum), GO:0005829 (cytosol), GO:0015030 (Cajal body), GO:0016020 (membrane), GO:0016604 (nuclear body), GO:0003924 (GTPase activity), GO:0005525 (GTP binding)			-0.378234	-0.347859		0.149928	-0.105562	0.0969343		0.342281	0.126081	0.116431					172.145	76.632	24.9934	0.556497	5.99585	15.7479	0.00195669	0.0507622	0.000796512	0.0956344	0.23887	0.793725	0.871614	0.0186875	0.0047941		47.7922	48.8516	69.8048	58.1511	67.2151	80.046	68.6277	68.1568
ENSG00000131724	IL13RA1	PC	interleukin 13 receptor subunit alpha 1	The protein encoded by this gene is a subunit of the interleukin 13 receptor. This subunit forms a receptor complex with IL4 receptor alpha, a subunit shared by IL13 and IL4 receptors. This subunit serves as a primary IL13-binding subunit of the IL13 receptor, and may also be a component of IL4 receptors. This protein has been shown to bind tyrosine kinase TYK2, and thus may mediate the signaling…	hsa04060 (Cytokine-cytokine receptor interaction), hsa04630 (JAK-STAT signaling pathway), hsa05200 (Pathways in cancer), GO:0007166 (cell surface receptor signaling pathway), GO:0019221 (cytokine-mediated signaling pathway), GO:0005886 (plasma membrane), GO:0005898 (interleukin-13 receptor complex), GO:0004896 (cytokine receptor activity), GO:0005515 (protein binding), R-HSA-1280215 (Homo sapiens…			-0.196446	-0.310621		-0.0955136	-0.24969	0.0744167		0.360382	0.218604	0.198868					172.114	64.0702	70.9484	0.557884	5.1678	14.5366	0.00258323	0.0571111	0.00124188	0.0621765	0.23887	0.881917	0.884928	0.00376031	0.00348814		30.4881	28.0161	32.8424	29.311	37.1978	45.791	41.3179	40.7293
ENSG00000182224	CYB5D1	PC	cytochrome b5 domain containing 1		GO:0046872 (metal ion binding)			0.873825	0.489791		-0.157964	-0.206879	-0.190389		-0.460029	-0.157964	-0.190389					172.06	32.1718	41.0587	-1.08746	3.40722	18.2802	0.00113973	0.0414133	8.7276e-05	0.127071	0.23887	-0.650328	-0.814834	0.0808152	0.0137492		19.6584	14.5966	8.59317	8.24003	8.35774	6.59202	8.59317	8.35774
ENSG00000139436	GIT2	PC	GIT ArfGAP 2	This gene encodes a member of the GIT protein family, which interact with G protein-coupled receptor kinases and possess ADP-ribosylation factor (ARF) GTPase-activating protein (GAP) activity. GIT proteins traffic between cytoplasmic complexes, focal adhesions, and the cell periphery, and interact with Pak interacting exchange factor beta (PIX) to form large oligomeric complexes that transiently …	hsa04144 (Endocytosis), GO:0008277 (regulation of G-protein coupled receptor protein signaling pathway), GO:0043547 (positive regulation of GTPase activity), GO:0048266 (behavioral response to pain), GO:0005654 (nucleoplasm), GO:0005925 (focal adhesion), GO:0005096 (GTPase activator activity), GO:0005515 (protein binding), GO:0032403 (protein complex binding), GO:0046872 (metal ion binding)			0.538698	0.468753		-0.17668	-0.0285764	-0.236388		-0.186461	-0.236388	-0.142958					172.058	65.7198	81.4733	-0.687331	5.26762	17.5926	0.00131333	0.0440736	0.000222406	0.12489	0.23887	-0.684422	-0.845962	0.0611479	0.0081143		55.2082	52.5008	32.8424	36.6093	31.4298	32.607	31.4298	33.6664
ENSG00000198938	MT-CO3	PC	mitochondrially encoded cytochrome c oxidase III		hsa00190 (Oxidative phosphorylation), hsa01100 (Metabolic pathways), hsa04260 (Cardiac muscle contraction), hsa04714 (Thermogenesis), hsa04932 (Non-alcoholic fatty liver disease (NAFLD)), hsa05010 (Alzheimer disease), hsa05012 (Parkinson disease), hsa05016 (Huntington disease), R-HSA-1428517 (Homo sapiens: The citric acid (TCA) cycle and respiratory electron transport), R-HSA-1430728 (Homo sapien…			0.781871	0.721518		-0.33516	-0.148361	-0.319389		-0.363651	-0.234225	-0.102602					171.908	99.9471	12.3511	-0.913929	13.0637	20.2287	0.00077654	0.035022	2.85782e-05	0.133469	0.23887	-0.566947	-0.809854	0.1428	0.0148292		13981.8	13408.9	6445.12	7336.33	6515.98	6319.04	6912.32	7572.82
ENSG00000169288	MRPL1	PC	mitochondrial ribosomal protein L1	Mammalian mitochondrial ribosomal proteins are encoded by nuclear genes and help in protein synthesis within the mitochondrion. Mitochondrial ribosomes (mitoribosomes) consist of a small 28S subunit and a large 39S subunit. They have an estimated 75% protein to rRNA composition compared to prokaryotic ribosomes, where this ratio is reversed. Another difference between mammalian mitoribosomes and …	hsa03010 (Ribosome), GO:0000469 (cleavage involved in rRNA processing), GO:0000470 (maturation of LSU-rRNA), GO:0006412 (translation), GO:0031118 (rRNA pseudouridine synthesis), GO:0031120 (snRNA pseudouridine synthesis), GO:0070125 (mitochondrial translational elongation), GO:0070126 (mitochondrial translational termination), GO:0005739 (mitochondrion), GO:0005743 (mitochondrial inner membrane),…			0.722743	0.701048		-0.334403	-0.214101	-0.181495		-0.230685	-0.181495	-0.281612					171.873	53.0346	11.9541	-0.964199	4.53816	19.1847	0.000950752	0.0389034	5.95592e-05	0.132113	0.23887	-0.608375	-0.824589	0.109509	0.0117802		37.4333	36.8447	16.9509	18.5989	19.0698	18.3635	19.0698	17.6572
ENSG00000171155	C1GALT1C1	PC	C1GALT1 specific chaperone 1	This gene encodes a type II transmembrane protein that is similar to the core 1 beta1,3-galactosyltransferase 1, which catalyzes the synthesis of the core-1 structure, also known as Thomsen-Friedenreich antigen, on O-linked glycans. This gene product lacks the galactosyltransferase activity itself, but instead acts as a molecular chaperone required for the folding, stability and full activity of …	hsa00512 (Mucin type O-glycan biosynthesis), hsa01100 (Metabolic pathways), GO:0006493 (protein O-linked glycosylation), GO:0016266 (O-glycan processing), GO:0016267 (O-glycan processing, core 1), GO:0030168 (platelet activation), GO:0036344 (platelet morphogenesis), GO:0000139 (Golgi membrane), GO:0016021 (integral component of membrane), GO:0070062 (extracellular vesicular exosome), GO:0005515 …			0.606341	0.631361		-0.292197	-0.245901	-0.0409596		-0.157541	-0.300059	-0.201044					171.633	55.4958	56.4711	-0.852032	4.6832	18.3775	0.00111742	0.0414133	0.000108081	0.133469	0.23887	-0.64254	-0.835412	0.085764	0.00981582		38.375	39.0813	19.6584	20.3646	23.7784	21.7772	19.5406	21.0709
ENSG00000155561	NUP205	PC	nucleoporin 205		hsa03013 (RNA transport), GO:0006406 (mRNA export from nucleus), GO:0006409 (tRNA export from nucleus), GO:0006913 (nucleocytoplasmic transport), GO:0007077 (mitotic nuclear envelope disassembly), GO:0010827 (regulation of glucose transport), GO:0016032 (viral process), GO:0016925 (protein sumoylation), GO:0019083 (viral transcription), GO:0031047 (gene silencing by RNA), GO:0051292 (nuclear pore…			0.686355	0.329709		-0.326185	-0.10859	0.0135322		-0.215877	-0.150057	-0.228886					171.584	80.2135	64.7287	-0.696	6.25627	16.8982	0.00152106	0.0475912	0.000213067	0.119433	0.23887	-0.718132	-0.796141	0.0448173	0.0180739		120.54	93.7009	58.7396	68.6277	74.8665	63.5659	66.6265	62.9774
ENSG00000181222	POLR2A	PC	RNA polymerase II subunit A	This gene encodes the largest subunit of RNA polymerase II, the polymerase responsible for synthesizing messenger RNA in eukaryotes. The product of this gene contains a carboxy terminal domain composed of heptapeptide repeats that are essential for polymerase activity. These repeats contain serine and threonine residues that are phosphorylated in actively transcribing RNA polymerase. In addition,…	hsa01100 (Metabolic pathways), hsa03020 (RNA polymerase), hsa05016 (Huntington disease), hsa05168 (Herpes simplex infection), GO:0000398 (mRNA splicing, via spliceosome), GO:0001172 (transcription, RNA-templated), GO:0006283 (transcription-coupled nucleotide-excision repair), GO:0006353 (DNA-templated transcription, termination), GO:0006355 (regulation of transcription, DNA-templated), GO:0006366…			0.134966	0.450281		-0.156572	0.0172631	0.042932		-0.105916	-0.172991	-0.209963					171.521	93.5074	48.0723	-0.453118	7.787	14.6194	0.00253355	0.056425	0.00125896	0.0685251	0.23887	-0.869318	-0.823743	0.00504681	0.0119433		239.903	298.995	195.642	220.95	224.953	202.705	193.405	188.461
ENSG00000035928	RFC1	PC	replication factor C subunit 1	This gene encodes the large subunit of replication factor C, a five subunit DNA polymerase accessory protein, which is a DNA-dependent ATPase required for eukaryotic DNA replication and repair. The large subunit acts as an activator of DNA polymerases, binds to the 3_ end of primers, and promotes coordinated synthesis of both strands. It may also have a role in telomere stability. Alternatively s…	hsa03030 (DNA replication), hsa03420 (Nucleotide excision repair), hsa03430 (Mismatch repair), GO:0000122 (negative regulation of transcription from RNA polymerase II promoter), GO:0000722 (telomere maintenance via recombination), GO:0006261 (DNA-dependent DNA replication), GO:0006283 (transcription-coupled nucleotide-excision repair), GO:0006296 (nucleotide-excision repair, DNA incision, 5'-to l…			-0.221693	-0.278449		-0.052239	-0.0221025	-0.0258353		0.358996	0.169615	0.071708					171.455	69.1161	35.0596	0.477471	5.4889	13.7132	0.00314544	0.0622659	0.0024716	0.0439369	0.23887	0.944911	0.896473	0.000400878	0.00256303		37.6687	36.1384	42.6127	43.5544	43.4367	57.3271	50.0287	46.615
ENSG00000251136	AF117829.1	lincRNA						0.553573	0.312537		-0.121424	0.0457129	-0.0474112		-0.121424	-0.281918	-0.339645					171.344	15.7375	30.4632	-0.90713	2.50582	14.0679	0.00288723	0.0602743	0.000748909	0.0537348	0.23887	-0.912563	-0.898282	0.00156352	0.00243445		8.71089	7.06288	4.70859	5.53259	5.06173	4.70859	4.0023	3.76687
ENSG00000143256	PFDN2	PC	prefoldin subunit 2	This gene encodes a member of the prefoldin beta subunit family. The encoded protein is one of six subunits of prefoldin, a molecular chaperone complex that binds and stabilizes newly synthesized polypeptides, thereby allowing them to fold correctly. The complex, consisting of two alpha and four beta subunits, forms a double beta barrel assembly with six protruding coiled-coils. [provided by RefS…	GO:0006457 (protein folding), GO:0051495 (positive regulation of cytoskeleton organization), GO:0005634 (nucleus), GO:0005737 (cytoplasm), GO:0005739 (mitochondrion), GO:0005829 (cytosol), GO:0016272 (prefoldin complex), GO:0070062 (extracellular vesicular exosome), GO:0005515 (protein binding), GO:0044183 (protein binding involved in protein folding), GO:0051082 (unfolded protein binding), R-HSA…			-0.114773	-0.400066		-0.000994755	-0.0407275	-0.0256992		0.345705	0.234288	0.00226743					171.318	93.0134	4.46405	0.455508	7.70433	13.6964	0.00315834	0.0622659	0.00171918	0.0439369	0.23887	0.944911	0.833534	0.000400878	0.0101405		190.227	155.737	206.001	200.35	202.469	262.504	242.845	206.472
ENSG00000135845	PIGC	PC	phosphatidylinositol glycan anchor biosynthesis class C	This gene encodes an endoplasmic reticulum associated protein that is involved in glycosylphosphatidylinositol (GPI) lipid anchor biosynthesis. The GPI lipid anchor is a glycolipid found on many blood cells and serves to anchor proteins to the cell surface. The encoded protein is one subunit of the GPI N-acetylglucosaminyl (GlcNAc) transferase that transfers GlcNAc to phosphatidylinositol (PI) on…	hsa00563 (Glycosylphosphatidylinositol (GPI)-anchor biosynthesis), hsa01100 (Metabolic pathways), GO:0006506 (GPI anchor biosynthetic process), GO:0016254 (preassembly of GPI anchor in ER membrane), GO:0000506 (glycosylphosphatidylinositol-N-acetylglucosaminyltransferase (GPI-GnT) complex), GO:0005789 (endoplasmic reticulum membrane), GO:0003824 (catalytic activity), GO:0017176 (phosphatidylinosi…			0.616343	0.357734		-0.0661969	-0.170835	-0.108368		-0.054371	-0.297533	-0.276773					171.178	58.5568	31.8924	-0.710869	4.85221	16.8382	0.00154075	0.0475912	0.000308637	0.119433	0.23887	-0.718132	-0.838861	0.0448173	0.00923682		43.9076	36.3738	26.6035	24.6024	25.7795	26.839	22.3658	22.7189
ENSG00000198695	MT-ND6	PC	mitochondrially encoded NADH:ubiquinone oxidoreductase core subunit 6		hsa00190 (Oxidative phosphorylation), hsa01100 (Metabolic pathways), hsa04714 (Thermogenesis), hsa04723 (Retrograde endocannabinoid signaling), hsa05012 (Parkinson disease), R-HSA-1428517 (Homo sapiens: The citric acid (TCA) cycle and respiratory electron transport), R-HSA-1430728 (Homo sapiens: Metabolism), R-HSA-163200 (Homo sapiens: Respiratory electron transport, ATP synthesis by chemiosmotic…			0.882951	0.760799		-0.333805	-0.169014	-0.402521		-0.0922967	-0.23404	-0.412073					171.172	99.5677	4.1288	-0.990309	10.8579	20.0994	0.000795941	0.035506	2.02426e-05	0.133469	0.23887	-0.566947	-0.800374	0.1428	0.0170294		3215.49	2954.29	1382.32	1549.83	1317.93	1634.59	1481.44	1309.22
ENSG00000274213	AC015912.3	lincRNA						-0.288272	-0.557521		0.0151767	0.0151767	0.0398428		0.28652	0.223318	0.265759					170.813	12.8088	1.48213	0.944217	2.35216	13.5729	0.00325508	0.0625337	0.000941435	0.0423134	0.23887	0.950586	0.970035	0.000290566	6.57638e-05		3.53144	2.58972	4.8263	4.8263	4.94402	6.23888	5.88573	6.12116
ENSG00000075945	KIFAP3	PC	kinesin associated protein 3	The small G protein GDP dissociation stimulator (smg GDS) is a regulator protein having two activities on a group of small G proteins including the Rho and Rap1 family members and Ki-Ras; one is to stimulate their GDP/GTP exchange reactions, and the other is to inhibit their interactions with membranes. The protein encoded by this gene contains 9 _Armadillo_ repeats and interacts with the smg GDS…	GO:0006461 (protein complex assembly), GO:0006890 (retrograde vesicle-mediated transport, Golgi to ER), GO:0007017 (microtubule-based process), GO:0007018 (microtubule-based movement), GO:0007165 (signal transduction), GO:0008285 (negative regulation of cell proliferation), GO:0019886 (antigen processing and presentation of exogenous peptide antigen via MHC class II), GO:0035735 (intraciliary tra…			0.357593	0.337963		-0.123965	-0.10593	0.249673		-0.160726	-0.247031	-0.307577					170.783	47.7417	81.4116	-0.641139	4.24428	13.6313	0.00320886	0.0624427	0.00150061	0.0439369	0.23887	-0.944911	-0.890321	0.000400878	0.0030331		24.1315	23.7784	16.7155	16.9509	22.2481	16.2446	15.1852	14.4789
ENSG00000147471	PLPBP	PC	pyridoxal phosphate binding protein		GO:0008150 (biological_process), GO:0005622 (intracellular), GO:0005737 (cytoplasm), GO:0005739 (mitochondrion), GO:0070062 (extracellular vesicular exosome), GO:0030170 (pyridoxal phosphate binding)			0.636173	0.804821		-0.210715	-0.179907	-0.274378		0.036682	-0.471695	-0.340981					170.781	46.6037	11.8835	-1.01424	4.18132	16.7793	0.00156037	0.0480174	0.000146689	0.119433	0.23887	-0.718132	-0.810936	0.0448173	0.0145902		27.4275	31.0767	14.3612	14.7143	13.6549	17.4218	11.6538	12.9486
ENSG00000125633	CCDC93	PC	coiled-coil domain containing 93		GO:0006893 (Golgi to plasma membrane transport), GO:0015031 (protein transport), GO:0005769 (early endosome), GO:0005515 (protein binding)			0.472079	0.322049		-0.267887	0.0629525	0.0980008		-0.1196	-0.336422	-0.231173					170.78	56.078	71.5748	-0.65655	4.71346	15.5596	0.00204122	0.0516503	0.000626005	0.0956344	0.23887	-0.793725	-0.877974	0.0186875	0.00413693		36.1384	32.3715	20.8355	26.7212	27.4275	23.3075	19.7761	21.4241
ENSG00000139926	FRMD6	PC	FERM domain containing 6		hsa04390 (Hippo signaling pathway), hsa04392 (Hippo signaling pathway - multiple species), GO:0003383 (apical constriction), GO:0031032 (actomyosin structure organization), GO:0032970 (regulation of actin filament-based process), GO:0034613 (cellular protein localization), GO:0005737 (cytoplasm), GO:0005856 (cytoskeleton), GO:0005886 (plasma membrane), GO:0043296 (apical junction complex), GO:000…			-0.519435	-0.0846578		-0.0511307	-0.135285	0.0817478		0.313897	0.135151	0.259712					170.645	80.7781	62.7261	0.538911	6.3038	14.3485	0.00270049	0.0583339	0.00107751	0.0621765	0.23887	0.881917	0.866586	0.00376031	0.0053585		53.5602	73.1008	74.8665	70.5111	82.2826	96.9969	85.4609	93.3478
ENSG00000099940	SNAP29	PC	synaptosome associated protein 29	This gene, a member of the SNAP25 gene family, encodes a protein involved in multiple membrane trafficking steps. Two other members of this gene family, SNAP23 and SNAP25, encode proteins that bind a syntaxin protein and mediate synaptic vesicle membrane docking and fusion to the plasma membrane. The protein encoded by this gene binds tightly to multiple syntaxins and is localized to intracellula…	hsa04130 (SNARE interactions in vesicular transport), hsa04140 (Autophagy - animal), GO:0006887 (exocytosis), GO:0006903 (vesicle targeting), GO:0015031 (protein transport), GO:0016082 (synaptic vesicle priming), GO:0016240 (autophagic vacuole docking), GO:0031629 (synaptic vesicle fusion to presynaptic membrane), GO:0043312 (neutrophil degranulation), GO:0060271 (cilium morphogenesis), GO:006102…			-0.71464	-0.332112		0.16462	-0.0789621	0.0630721		0.107471	0.54424	0.246311					170.304	28.8638	72.7746	0.980162	3.22852	14.4622	0.00262888	0.05742	0.00053587	0.0685251	0.23887	0.869318	0.862281	0.00504681	0.00587422		4.59087	6.59202	10.1235	8.24003	9.29946	9.65261	13.7726	10.8298
ENSG00000134882	UBAC2	PC	UBA domain containing 2		GO:0006508 (proteolysis), GO:0070972 (protein localization to endoplasmic reticulum), GO:1904153 (NA), GO:0005783 (endoplasmic reticulum), GO:0005789 (endoplasmic reticulum membrane), GO:0016021 (integral component of membrane), GO:0004252 (serine-type endopeptidase activity), GO:0005515 (protein binding), GO:0043130 (ubiquitin binding)			-0.222468	-0.222468		-0.123215	0.0319854	-0.0721744		0.201117	0.284821	0.122403					170.188	69.0896	39.6295	0.453521	5.48796	13.4971	0.00331613	0.0627031	0.0029582	0.0423134	0.23887	0.950586	0.930445	0.000290566	0.000797978		37.6687	37.6687	40.4939	45.3202	42.0241	51.2059	54.3842	48.3807
ENSG00000081307	UBA5	PC	ubiquitin like modifier activating enzyme 5	This gene encodes a member of the E1-like ubiquitin-activating enzyme family. This protein activates ubiquitin-fold modifier 1, a ubiquitin-like post-translational modifier protein, via the formation of a high-energy thioester bond. Two alternatively spliced transcript variants encoding distinct isoforms have been found for this gene. A pseudogene located on chromosome 1 has also been identified.…	GO:0033146 (regulation of intracellular estrogen receptor signaling pathway), GO:0034976 (response to endoplasmic reticulum stress), GO:0071569 (protein ufmylation), GO:1990592 (NA), GO:0005634 (nucleus), GO:0005737 (cytoplasm), GO:0005829 (cytosol), GO:0043231 (intracellular membrane-bounded organelle), GO:0005515 (protein binding), GO:0005524 (ATP binding), GO:0046872 (metal ion binding), GO:00…			0.630458	0.447006		-0.120964	-0.226212	-0.157677		-0.157677	-0.2498	-0.165133					170.165	54.1284	57.0534	-0.745714	4.60772	15.9834	0.00185665	0.0504522	0.000382947	0.105505	0.23887	-0.760469	-0.827639	0.0284811	0.0112035		37.4333	32.7247	21.4241	19.7761	20.8355	20.8355	19.4229	20.7178
ENSG00000130147	SH3BP4	PC	SH3 domain binding protein 4	This gene encodes a protein with 3 Asn-Pro-Phe (NPF) motifs, an SH3 domain, a PXXP motif, a bipartite nuclear targeting signal, and a tyrosine phosphorylation site. This protein is involved in cargo-specific control of clathrin-mediated endocytosis, specifically controlling the internalization of a specific protein receptor. [provided by RefSeq, Jul 2008]. Publication Note: This RefSeq record inc…	GO:0006897 (endocytosis), GO:0008285 (negative regulation of cell proliferation), GO:0010508 (positive regulation of autophagy), GO:0030308 (negative regulation of cell growth), GO:0032007 (negative regulation of TOR signaling), GO:0034260 (negative regulation of GTPase activity), GO:0050790 (regulation of catalytic activity), GO:0061462 (protein localization to lysosome), GO:0071230 (cellular re…			0.629524	0.38		-0.125245	-0.12167	-0.176256		-0.357823	-0.17997	-0.0485605					170.078	72.0625	67.1901	-0.686871	5.67989	16.6755	0.00159567	0.0481079	0.000273115	0.119433	0.23887	-0.718132	-0.817164	0.0448173	0.0132613		78.0448	65.3317	45.4379	45.5556	43.7899	38.375	43.6722	48.0276
ENSG00000143933	CALM2	PC	calmodulin 2		hsa04014 (Ras signaling pathway), hsa04015 (Rap1 signaling pathway), hsa04020 (Calcium signaling pathway), hsa04022 (cGMP-PKG signaling pathway), hsa04024 (cAMP signaling pathway), hsa04070 (Phosphatidylinositol signaling system), hsa04114 (Oocyte meiosis), hsa04218 (Cellular senescence), hsa04261 (Adrenergic signaling in cardiomyocytes), hsa04270 (Vascular smooth muscle contraction), hsa04371 (A…			0.710642	0.549652		-0.231502	-0.202201	-0.201659		-0.280173	-0.15605	-0.18871					170.045	98.3945	47.4724	-0.785865	9.54113	22.1425	0.000545305	0.0315542	1.58646e-05	0.119433	0.23887	-0.491354	-0.819489	0.216255	0.0127857		1177.5	1052.96	611.881	624.476	624.712	591.516	644.841	630.362
ENSG00000264538	SUZ12P1	transcribed_u_Pg	SUZ12 pseudogene 1					1.16585	0.638998		-0.127952	-0.497219	-0.224175		-0.354247	-0.574395	-0.0268579					169.993	42.6606	18.9237	-1.32125	3.96457	18.1149	0.00117887	0.0420242	5.53074e-05	0.133469	0.23887	-0.64254	-0.774387	0.085764	0.024071		33.7841	22.8367	12.5955	9.29946	11.6538	10.4766	8.71089	13.6549
ENSG00000001631	KRIT1	PC	KRIT1, ankyrin repeat containing	This gene encodes a protein containing four ankyrin repeats, a band 4.1/ezrin/radixin/moesin (FERM) domain, and multiple NPXY sequences. The encoded protein is localized in the nucleus and cytoplasm. It binds to integrin cytoplasmic domain-associated protein-1 alpha (ICAP1alpha), and plays a critical role in beta1-integrin-mediated cell proliferation. It associates with junction proteins and RAS-…	hsa04015 (Rap1 signaling pathway), GO:0001525 (angiogenesis), GO:0001937 (negative regulation of endothelial cell proliferation), GO:0007264 (small GTPase mediated signal transduction), GO:0010596 (negative regulation of endothelial cell migration), GO:0016525 (negative regulation of angiogenesis), GO:0032092 (positive regulation of protein binding), GO:0045454 (cell redox homeostasis), GO:005079…			0.464909	0.663605		0.116079	-0.230756	-0.154397		-0.184458	-0.564533	-0.11045					169.753	34.0508	54.9537	-0.957776	3.50956	16.6275	0.00161231	0.0484419	0.000190734	0.119433	0.23887	-0.718132	-0.859041	0.0448173	0.00628258		15.5383	18.1281	11.7715	8.8286	9.41718	9.18175	6.59202	9.77032
ENSG00000138069	RAB1A	PC	RAB1A, member RAS oncogene family	This gene encodes a member of the Ras superfamily of GTPases. Members of the gene family cycle between inactive GDP-bound and active GTP-bound forms. This small GTPase controls vesicle traffic from the endoplasmic reticulum to the Golgi apparatus. Multiple alternatively spliced transcript variants have been identified for this gene which encode different protein isoforms. [provided by RefSeq, Oct…	hsa05134 (Legionellosis), GO:0000045 (autophagic vacuole assembly), GO:0006888 (ER to Golgi vesicle-mediated transport), GO:0006890 (retrograde vesicle-mediated transport, Golgi to ER), GO:0006897 (endocytosis), GO:0006914 (autophagy), GO:0007030 (Golgi organization), GO:0016192 (vesicle-mediated transport), GO:0016477 (cell migration), GO:0019068 (virion assembly), GO:0030252 (growth hormone sec…			0.328346	0.629802		-0.195225	-0.00607823	-0.179761		-0.229839	-0.173622	-0.173622					169.718	76.0674	58.906	-0.663852	5.95844	17.99	0.00120951	0.0424729	0.000186144	0.130269	0.23887	-0.646399	-0.820952	0.0832906	0.0124919		76.5146	94.7603	52.6185	60.2699	53.207	51.3236	53.4425	53.4425
ENSG00000115762	PLEKHB2	PC	pleckstrin homology domain containing B2		GO:0045595 (regulation of cell differentiation), GO:0016021 (integral component of membrane), GO:0055038 (recycling endosome membrane), GO:0005515 (protein binding)			0.274942	0.324303		-0.026853	0.00842302	-0.10261		-0.169367	-0.038806	-0.270031					169.667	78.9167	79.603	-0.45247	6.16129	14.3802	0.00268031	0.0582876	0.00180723	0.0685251	0.23887	-0.869318	-0.89875	0.00504681	0.00240184		85.9317	88.9923	69.334	71.0997	65.6848	62.6242	68.7454	58.2688
ENSG00000171928	TVP23B	PC	trans-golgi network vesicle protein 23 homolog B		GO:0009306 (protein secretion), GO:0016192 (vesicle-mediated transport), GO:0030173 (integral component of Golgi membrane)			0.143081	0.824837		-0.157059	-0.0113733	-0.103945		-0.202866	-0.299087	-0.193587					169.652	49.0561	48.0988	-0.798048	4.31425	13.4938	0.00331879	0.0627031	0.000951113	0.0439369	0.23887	-0.944911	-0.741174	0.000400878	0.0353686		21.1886	35.1967	16.8332	18.8344	17.5395	16.2446	15.0675	16.3623
ENSG00000117143	UAP1	PC	UDP-N-acetylglucosamine pyrophosphorylase 1		hsa00520 (Amino sugar and nucleotide sugar metabolism), hsa01100 (Metabolic pathways), GO:0006048 (UDP-N-acetylglucosamine biosynthetic process), GO:0005654 (nucleoplasm), GO:0005829 (cytosol), GO:0005886 (plasma membrane), GO:0003977 (UDP-N-acetylglucosamine diphosphorylase activity), GO:0030246 (carbohydrate binding), GO:0042802 (identical protein binding), R-HSA-392499 (Homo sapiens: Metabolis…			0.547162	0.710128		-0.29991	-0.199479	-0.160881		-0.194792	-0.215212	-0.187015					169.634	87.8793	55.4389	-0.787041	6.99268	19.8304	0.000838169	0.0362642	4.40452e-05	0.133469	0.23887	-0.566947	-0.811287	0.1428	0.0145132		180.103	201.881	99.2335	106.532	109.475	106.885	105.355	107.474
ENSG00000198830	HMGN2	PC	high mobility group nucleosomal binding domain 2	The protein encoded by this gene binds nucleosomal DNA and is associated with transcriptionally active chromatin. Along with a similar protein, HMGN1, the encoded protein may help maintain an open chromatin configuration around transcribable genes. The protein has also been found to have antimicrobial activity against bacteria, viruses and fungi. [provided by RefSeq, Oct 2014]. Publication Note: …	GO:0000785 (chromatin), GO:0005634 (nucleus), GO:0005737 (cytoplasm), GO:0003723 (RNA binding), GO:0005515 (protein binding), GO:0031492 (nucleosomal DNA binding)			-0.413043	-0.311136		0.230244	-0.00432167	0.00880092		0.0878519	0.134055	0.267549					169.406	98.4386	20.697	0.49795	9.58844	15.3707	0.00213039	0.0524539	0.000813104	0.0956344	0.23887	0.793725	0.840575	0.0186875	0.00895739		570.563	612.47	892.277	758.083	765.028	808.229	834.597	915.703
ENSG00000131165	CHMP1A	PC	charged multivesicular body protein 1A	This gene encodes a member of the CHMP/Chmp family of proteins which are involved in multivesicular body sorting of proteins to the interiors of lysosomes. The initial prediction of the protein sequence encoded by this gene suggested that the encoded protein was a metallopeptidase. The nomenclature has been updated recently to reflect the correct biological function of this encoded protein. Sever…	hsa04144 (Endocytosis), hsa04217 (Necroptosis), GO:0000920 (cytokinetic cell separation), GO:0006351 (transcription, DNA-templated), GO:0006508 (proteolysis), GO:0006997 (nucleus organization), GO:0007034 (vacuolar transport), GO:0007076 (mitotic chromosome condensation), GO:0007080 (mitotic metaphase plate congression), GO:0010824 (regulation of centrosome duplication), GO:0015031 (protein trans…			-0.422401	-0.21387		0.0196552	0.0648143	0.0802919		0.228554	0.117203	0.125753					168.885	78.9961	35.4124	0.462847	6.16869	13.4009	0.00339561	0.0635518	0.00248134	0.0439369	0.23887	0.944911	0.905601	0.000400878	0.00195691		52.5008	60.9762	72.0414	74.3957	75.2197	83.5774	77.2208	77.6917
ENSG00000172269	DPAGT1	PC	dolichyl-phosphate N-acetylglucosaminephosphotransferase 1	The protein encoded by this gene is an enzyme that catalyzes the first step in the dolichol-linked oligosaccharide pathway for glycoprotein biosynthesis. This enzyme belongs to the glycosyltransferase family 4. This protein is an integral membrane protein of the endoplasmic reticulum. The congenital disorder of glycosylation type Ij is caused by mutation in the gene encoding this enzyme. [provide…	hsa00510 (N-Glycan biosynthesis), hsa01100 (Metabolic pathways), GO:0006047 (UDP-N-acetylglucosamine metabolic process), GO:0006487 (protein N-linked glycosylation), GO:0006488 (dolichol-linked oligosaccharide biosynthetic process), GO:0006489 (dolichyl diphosphate biosynthetic process), GO:0019348 (dolichol metabolic process), GO:0051259 (protein oligomerization), GO:0005789 (endoplasmic reticul…			0.223644	0.253448		-0.0465314	0.115673	0.0274708		-0.282751	-0.214398	-0.0765545					168.844	72.2742	47.6489	-0.445042	5.69432	13.3959	0.00339979	0.0635518	0.00296047	0.0439369	0.23887	-0.944911	-0.937263	0.000400878	0.000588653		60.0345	61.3294	49.4402	55.5613	52.1476	41.671	43.7899	48.3807
ENSG00000140365	COMMD4	PC	COMM domain containing 4		GO:0006351 (transcription, DNA-templated), GO:0006355 (regulation of transcription, DNA-templated), GO:0005634 (nucleus), GO:0005737 (cytoplasm), GO:0005515 (protein binding)			-0.562009	-0.371485		0.111819	0.165085	0.142348		0.194519	0.201534	0.118189					168.64	89.8024	29.7662	0.593396	7.21386	15.2657	0.00218194	0.0526368	0.000608829	0.0956344	0.23887	0.793725	0.850799	0.0186875	0.00740192		98.0563	112.182	157.62	163.623	161.034	167.037	167.861	158.326
ENSG00000278259	MYO19	PC	myosin XIX		GO:0005741 (mitochondrial outer membrane), GO:0016459 (myosin complex), GO:0003779 (actin binding), GO:0005524 (ATP binding), GO:0016887 (ATPase activity), GO:0032027 (myosin light chain binding), GO:0060002 (plus-end directed microfilament motor activity)			0.419247	0.516639		-0.0895278	-0.0268557	-0.0804062		-0.467438	-0.3679	0.0962418					168.475	75.0088	50.9131	-0.690927	5.88203	16.4394	0.00167954	0.0489441	0.000276559	0.119433	0.23887	-0.718132	-0.843859	0.0448173	0.00843716		77.2208	82.7534	53.6779	56.1499	54.031	40.847	43.9076	61.3294
ENSG00000119335	SET	PC	SET nuclear proto-oncogene	The protein encoded by this gene inhibits acetylation of nucleosomes, especially histone H4, by histone acetylases (HAT). This inhibition is most likely accomplished by masking histone lysines from being acetylated, and the consequence is to silence HAT-dependent transcription. The encoded protein is part of a complex localized to the endoplasmic reticulum but is found in the nucleus and inhibits…	GO:0006260 (DNA replication), GO:0006334 (nucleosome assembly), GO:0006337 (nucleosome disassembly), GO:0006913 (nucleocytoplasmic transport), GO:0016032 (viral process), GO:0035067 (negative regulation of histone acetylation), GO:0043086 (negative regulation of catalytic activity), GO:0043488 (regulation of mRNA stability), GO:0043524 (negative regulation of neuron apoptotic process), GO:0045892…			0.340776	0.668223		-0.22433	-0.091421	-0.142302		-0.296592	-0.12433	-0.130024					168.44	93.8426	27.6048	-0.658033	7.85789	17.8672	0.00124052	0.042796	0.000139261	0.133469	0.23887	-0.64254	-0.795178	0.085764	0.018317		286.753	360.325	193.17	212.004	204.588	183.635	207.178	206.354
ENSG00000067113	PLPP1	PC	phospholipid phosphatase 1	The protein encoded by this gene is a member of the phosphatidic acid phosphatase (PAP) family. PAPs convert phosphatidic acid to diacylglycerol, and function in synthesis of glycerolipids and in phospholipase D-mediated signal transduction. This enzyme is an integral membrane glycoprotein that plays a role in the hydrolysis and uptake of lipids from extracellular space. Alternate splicing result…	hsa00561 (Glycerolipid metabolism), hsa00564 (Glycerophospholipid metabolism), hsa00565 (Ether lipid metabolism), hsa00600 (Sphingolipid metabolism), hsa01100 (Metabolic pathways), hsa04072 (Phospholipase D signaling pathway), hsa04666 (Fc gamma R-mediated phagocytosis), hsa04975 (Fat digestion and absorption), hsa05231 (Choline metabolism in cancer), GO:0006470 (protein dephosphorylation), GO:00…			0.419335	0.218115		0.0952498	-0.0627146	0.116468		-0.123602	-0.281157	-0.381694					168.209	38.1704	20.8734	-0.671877	3.73673	13.319	0.00346499	0.0640005	0.00166509	0.0439369	0.23887	-0.944911	-0.922688	0.000400878	0.00108933		17.8926	15.3029	13.8903	12.2423	14.1258	11.6538	10.2412	9.41718
ENSG00000257411	AC034102.2	PC						0.350724	0.591384		-0.116204	-0.0269574	-0.184765		-0.427971	-0.223684	0.0374727					168.162	91.7431	3.4142	-0.640984	7.47894	16.3934	0.00169648	0.0490628	0.000263449	0.119433	0.23887	-0.718132	-0.809411	0.0448173	0.0149279		222.363	263.092	160.327	170.686	152.794	128.78	148.674	178.573
ENSG00000106546	AHR	PC	aryl hydrocarbon receptor	This gene encodes a ligand-activated transcription factor involved in the regulation of biological responses to planar aromatic hydrocarbons. This receptor has been shown to regulate xenobiotic-metabolizing enzymes such as cytochrome P450. Its ligands included a variety of aromatic hydrocarbons. [provided by RefSeq, Jul 2008]. Sequence Note: This RefSeq record was created from transcript and geno…	hsa04659 (Th17 cell differentiation), hsa04934 (Cushing syndrome), GO:0001568 (blood vessel development), GO:0006355 (regulation of transcription, DNA-templated), GO:0006357 (regulation of transcription from RNA polymerase II promoter), GO:0006366 (transcription from RNA polymerase II promoter), GO:0006805 (xenobiotic metabolic process), GO:0006915 (apoptotic process), GO:0007049 (cell cycle), GO…			-0.283784	-0.338238		0.0768442	-0.301708	-0.0844527		0.307162	0.259064	0.365114					168.019	30.7604	84.4199	0.772574	3.32911	14.0142	0.00292469	0.0605006	0.000978516	0.0621765	0.23887	0.881917	0.91373	0.00376031	0.00150309		7.53374	7.1806	10.2412	7.41603	8.94632	12.36	11.8892	12.9486
ENSG00000011478	QPCTL	PC	glutaminyl-peptide cyclotransferase like		GO:0017186 (peptidyl-pyroglutamic acid biosynthetic process, using glutaminyl-peptide cyclotransferase), GO:0000139 (Golgi membrane), GO:0005794 (Golgi apparatus), GO:0016020 (membrane), GO:0016021 (integral component of membrane), GO:0008270 (zinc ion binding), GO:0016603 (glutaminyl-peptide cyclotransferase activity)			-0.333422	-0.551029		0.158886	-0.169913	-0.0544297		0.727827	0.199339	0.0227422					167.858	50.6263	40.2206	0.860484	4.40722	14.1477	0.0028326	0.0596848	0.000678061	0.0685251	0.23887	0.869318	0.757346	0.00504681	0.0295342		15.6561	13.184	22.8367	17.7749	19.4229	34.8436	23.5429	20.6001
ENSG00000159140	SON	PC	SON DNA binding protein	This gene encodes a protein that contains multiple simple repeats. The encoded protein binds RNA and promotes pre-mRNA splicing, particularly of transcripts with poor splice sites. The protein also recognizes a specific DNA sequence found in the human hepatitis B virus (HBV) and represses HBV core promoter activity. There is a pseudogene for this gene on chromosome 1. Alternative splicing results…	GO:0000226 (microtubule cytoskeleton organization), GO:0000281 (mitotic cytokinesis), GO:0006397 (mRNA processing), GO:0008380 (RNA splicing), GO:0043066 (negative regulation of apoptotic process), GO:0043484 (regulation of RNA splicing), GO:0048024 (regulation of mRNA splicing, via spliceosome), GO:0051726 (regulation of cell cycle), GO:0016607 (nuclear speck), GO:0003676 (nucleic acid binding),…			0.386412	0.204102		0.150105	-0.0601222	-0.0251868		-0.281348	-0.12522	-0.248741					167.799	53.2551	85.0551	-0.556271	4.55812	13.2694	0.00350785	0.0642734	0.00226977	0.0439369	0.23887	-0.944911	-0.915036	0.000400878	0.0014373		30.7235	26.839	25.7795	22.0126	22.6012	18.5989	20.9532	19.0698
ENSG00000165304	MELK	PC	maternal embryonic leucine zipper kinase		GO:0000086 (G2/M transition of mitotic cell cycle), GO:0000226 (microtubule cytoskeleton organization), GO:0006915 (apoptotic process), GO:0008283 (cell proliferation), GO:0008631 (intrinsic apoptotic signaling pathway in response to oxidative stress), GO:0018108 (peptidyl-tyrosine phosphorylation), GO:0030010 (establishment of cell polarity), GO:0030097 (hemopoiesis), GO:0035556 (intracellular s…			-0.363736	-0.0959501		-0.046645	-0.0152617	-0.0634879		0.351329	0.0339068	0.199845					167.79	92.59	63.8641	0.433557	7.63767	13.2683	0.00350881	0.0642734	0.00221624	0.0439369	0.23887	0.944911	0.835722	0.000400878	0.00976277		152.676	184.223	190.698	194.936	188.461	251.909	201.763	226.601
ENSG00000115233	PSMD14	PC	proteasome 26S subunit, non-ATPase 14	This gene encodes a component of the 26S proteasome. The 26S proteasome is a large multiprotein complex that catalyzes the degradation of ubiquitinated intracellular proteins. The encoded protein is a component of the 19S regulatory cap complex of the 26S proteasome and mediates substrate deubiquitination. A pseudogene of this gene is also located on the long arm of chromosome 2. [provided by Ref…	hsa03050 (Proteasome), hsa05169 (Epstein-Barr virus infection), GO:0000165 (MAPK cascade), GO:0000209 (protein polyubiquitination), GO:0000724 (double-strand break repair via homologous recombination), GO:0002223 (stimulatory C-type lectin receptor signaling pathway), GO:0002479 (antigen processing and presentation of exogenous peptide antigen via MHC class I, TAP-dependent), GO:0006303 (double-s…			0.289763	0.562205		-0.249285	-0.0214601	-0.0744581		-0.166399	-0.101706	-0.23866					167.359	88.3998	71.5748	-0.575284	7.05691	16.2756	0.00174078	0.0495181	0.000397272	0.119433	0.23887	-0.718132	-0.811096	0.0448173	0.0145551		159.974	193.641	109.475	128.544	123.836	116.067	121.482	110.299
ENSG00000108509	CAMTA2	PC	calmodulin binding transcription activator 2	The protein encoded by this gene is a member of the calmodulin-binding transcription activator protein family. Members of this family share a common domain structure that consists of a transcription activation domain, a DNA-binding domain, and a calmodulin-binding domain. The encoded protein may be a transcriptional coactivator of genes involved in cardiac growth. Alternate splicing results in mu…	GO:0006357 (regulation of transcription from RNA polymerase II promoter), GO:0006366 (transcription from RNA polymerase II promoter), GO:0014898 (cardiac muscle hypertrophy in response to stress), GO:0045944 (positive regulation of transcription from RNA polymerase II promoter), GO:0005634 (nucleus), GO:0001077 (RNA polymerase II core promoter proximal region sequence-specific DNA binding transcr…			0.324692	0.315867		0.043937	0.043937	-0.0105148		-0.389059	-0.0903743	-0.238485					167.284	39.2996	75.7918	-0.632526	3.79142	13.1469	0.00361641	0.0651419	0.00190346	0.0423134	0.23887	-0.950586	-0.954954	0.000290566	0.000220868		17.3041	17.1863	13.8903	13.8903	13.3018	9.77032	12.4778	11.0652
ENSG00000120697	ALG5	PC	ALG5, dolichyl-phosphate beta-glucosyltransferase	This gene encodes a member of the glycosyltransferase 2 family. The encoded protein participates in glucosylation of the oligomannose core in N-linked glycosylation of proteins. The addition of glucose residues to the oligomannose core is necessary to ensure substrate recognition, and therefore, effectual transfer of the oligomannose core to the nascent glycoproteins. Multiple transcript variants…	hsa00510 (N-Glycan biosynthesis), hsa01100 (Metabolic pathways), GO:0006486 (protein glycosylation), GO:0006487 (protein N-linked glycosylation), GO:0007368 (determination of left/right symmetry), GO:0018279 (protein N-linked glycosylation via asparagine), GO:0005789 (endoplasmic reticulum membrane), GO:0016020 (membrane), GO:0016021 (integral component of membrane), GO:0004576 (oligosaccharyl tr…			0.66505	0.586366		-0.178371	-0.292706	-0.183878		-0.170151	-0.220192	-0.206117					167.254	78.6521	15.4566	-0.793378	6.14218	19.4161	0.000908467	0.0381421	5.92595e-05	0.133469	0.23887	-0.566947	-0.818661	0.1428	0.0129539		108.886	103	59.7991	55.0905	59.5636	60.1522	58.0333	58.6219
ENSG00000104427	ZC2HC1A	PC	zinc finger C2HC-type containing 1A		GO:0005515 (protein binding), GO:0046872 (metal ion binding)			-0.522383	-0.132321		-0.380318	0.0121039	-0.380318		0.550628	0.47786	0.374749					167.253	2.45236	46.5726	1.43033	1.73354	14.6564	0.0025117	0.0564156	0.000189294	0.0742438	0.23887	0.823842	0.844142	0.0119243	0.00839318		1.41258	2.47201	1.76572	2.94287	1.76572	5.17945	4.8263	4.35544
ENSG00000106144	CASP2	PC	caspase 2	This gene encodes a member of the cysteine-aspartic acid protease (caspase) family. Caspases mediate cellular apoptosis through the proteolytic cleavage of specific protein substrates. The encoded protein may function in stress-induced cell death pathways, cell cycle maintenance, and the suppression of tumorigenesis. Increased expression of this gene may play a role in neurodegenerative disorders…	hsa04210 (Apoptosis), GO:0001554 (luteolysis), GO:0003407 (neural retina development), GO:0006915 (apoptotic process), GO:0006919 (activation of cysteine-type endopeptidase activity involved in apoptotic process), GO:0006977 (DNA damage response, signal transduction by p53 class mediator resulting in cell cycle arrest), GO:0007420 (brain development), GO:0007568 (aging), GO:0008630 (intrinsic apo…			0.48996	0.374628		-0.0967717	-0.12344	-0.156107		-0.238247	-0.192351	-0.0576712					167.17	78.0258	86.105	-0.575486	6.09016	16.2479	0.00175138	0.0495181	0.000479598	0.119433	0.23887	-0.718132	-0.839913	0.0448173	0.00906466		94.5249	87.1089	62.2711	61.0939	59.6814	56.2676	58.1511	64.0368
ENSG00000113758	DBN1	PC	drebrin 1	The protein encoded by this gene is a cytoplasmic actin-binding protein thought to play a role in the process of neuronal growth. It is a member of the drebrin family of proteins that are developmentally regulated in the brain. A decrease in the amount of this protein in the brain has been implicated as a possible contributing factor in the pathogenesis of memory disturbance in Alzheimer_s diseas…	GO:0007015 (actin filament organization), GO:0010643 (cell communication by chemical coupling), GO:0010644 (cell communication by electrical coupling), GO:0032507 (maintenance of protein location in cell), GO:0048168 (regulation of neuronal synaptic plasticity), GO:0050773 (regulation of dendrite development), GO:0061351 (neural precursor cell proliferation), GO:0005737 (cytoplasm), GO:0005886 (p…			-0.411087	-0.380578		0.0655078	0.119308	0.102355		0.259466	0.223332	0.0216964					167.162	89.0879	56.277	0.540004	7.1213	16.2467	0.00175186	0.0495181	0.000592407	0.119433	0.23887	0.718132	0.865844	0.0448173	0.0054452		102.647	104.884	143.612	149.145	147.379	164.565	160.445	139.256
ENSG00000089009	RPL6	PC	ribosomal protein L6	Ribosomes, the organelles that catalyze protein synthesis, consist of a small 40S subunit and a large 60S subunit. Together these subunits are composed of 4 RNA species and approximately 80 structurally distinct proteins. This gene encodes a ribosomal protein that is a component of the 60S subunit. The protein belongs to the L6E family of ribosomal proteins. It is located in the cytoplasm. The pr…	hsa03010 (Ribosome), GO:0000027 (ribosomal large subunit assembly), GO:0000184 (nuclear-transcribed mRNA catabolic process, nonsense-mediated decay), GO:0002181 (cytoplasmic translation), GO:0006355 (regulation of transcription, DNA-templated), GO:0006364 (rRNA processing), GO:0006412 (translation), GO:0006413 (translational initiation), GO:0006614 (SRP-dependent cotranslational protein targeting…			-0.185717	-0.128804		-0.0288687	-0.0521393	-0.0895774		0.207982	0.0754166	0.201707					167.093	99.4884	15.2095	0.329372	10.6879	13.1842	0.00358294	0.064986	0.00456551	0.0439369	0.23887	0.944911	0.917982	0.000400878	0.00129585		1443.18	1501.33	1609.16	1583.38	1542.77	1896.62	1729.94	1888.38
ENSG00000196683	TOMM7	PC	translocase of outer mitochondrial membrane 7	This gene encodes a subunit of the translocase of the outer mitochondrial membrane. The encoded protein regulates the assembly and stability of the translocase complex. [provided by RefSeq, Oct 2012].	hsa04137 (Mitophagy - animal), GO:0006626 (protein targeting to mitochondrion), GO:0016236 (macroautophagy), GO:0030150 (protein import into mitochondrial matrix), GO:0031647 (regulation of protein stability), GO:0045040 (protein import into mitochondrial outer membrane), GO:0098779 (NA), GO:1903955 (NA), GO:0005739 (mitochondrion), GO:0005741 (mitochondrial outer membrane), GO:0005742 (mitochond…			-0.126987	-0.482958		-0.0119796	-0.107889	0.0764326		0.441869	0.137359	0.0741541					167.062	93.1634	4.43758	0.522573	7.73842	14.0458	0.0029026	0.0603741	0.00108691	0.0685251	0.23887	0.869318	0.807064	0.00504681	0.015457		192.346	149.851	208.473	194.936	221.774	286.282	231.427	221.421
ENSG00000170089	AC106795.1	transcribed_u_Pg						-0.290381	-0.300097		-0.121527	-0.0874788	0.0179364		0.518377	0.301038	-0.0378669					166.682	67.6517	8.95457	0.611146	5.38859	13.9972	0.00293665	0.0605269	0.0011436	0.0685251	0.23887	0.869318	0.796384	0.00504681	0.0180128		33.0778	32.8424	37.4333	38.375	41.4356	59.4459	50.8527	39.7876
ENSG00000273747	AC022558.3	As						0.732119	0.507783		0.175672	-0.167674	-0.351149		-0.167674	-0.561404	-0.167674					166.439	22.68	8.98985	-1.12305	2.90205	15.8465	0.00191403	0.0507622	0.000204812	0.107394	0.23887	-0.735867	-0.842657	0.0374248	0.00862529		12.7132	10.5943	8.0046	5.88573	4.94402	5.88573	4.0023	5.88573
ENSG00000172239	PAIP1	PC	poly(A) binding protein interacting protein 1	The protein encoded by this gene interacts with poly(A)-binding protein and with the cap-binding complex eIF4A. It is involved in translational initiation and protein biosynthesis. Overexpression of this gene in COS7 cells stimulates translation. Alternative splicing occurs at this locus and three transcript variants encoding three distinct isoforms have been identified. [provided by RefSeq, Jul …	hsa03013 (RNA transport), GO:0000289 (nuclear-transcribed mRNA poly(A) tail shortening), GO:0006413 (translational initiation), GO:0045727 (positive regulation of translation), GO:0048255 (mRNA stabilization), GO:0005737 (cytoplasm), GO:0005829 (cytosol), GO:0003723 (RNA binding), GO:0005515 (protein binding), GO:0008494 (translation activator activity), R-HSA-429914 (Homo sapiens: Deadenylation-…			1.05927	0.766695		-0.160346	-0.426179	-0.4095		-0.357386	-0.228923	-0.24363					166.292	78.9785	41.738	-1.1558	6.16633	21.4186	0.000621733	0.0331913	1.03511e-05	0.119433	0.23887	-0.491354	-0.796635	0.216255	0.0179499		139.727	113.712	58.8573	48.6162	49.2047	51.0882	56.0322	55.4436
ENSG00000273184	AC010655.4	PT						0.737396	0.669577		-0.262676	-0.0829534	-0.190879		-0.468017	-0.502373	0.0999258					166.284	37.0677	9.62506	-1.06761	3.67658	16.1182	0.00180211	0.0500772	0.000184653	0.119433	0.23887	-0.718132	-0.824438	0.0448173	0.0118092		21.0709	20.0115	9.53489	11.0652	10.1235	8.0046	7.76917	12.8309
ENSG00000168310	IRF2	PC	interferon regulatory factor 2	IRF2 encodes interferon regulatory factor 2, a member of the interferon regulatory transcription factor (IRF) family. IRF2 competitively inhibits the IRF1-mediated transcriptional activation of interferons alpha and beta, and presumably other genes that employ IRF1 for transcription activation. However, IRF2 also functions as a transcriptional activator of histone H4. [provided by RefSeq, Jul 200…	GO:0000122 (negative regulation of transcription from RNA polymerase II promoter), GO:0006355 (regulation of transcription, DNA-templated), GO:0006366 (transcription from RNA polymerase II promoter), GO:0007596 (blood coagulation), GO:0008283 (cell proliferation), GO:0045944 (positive regulation of transcription from RNA polymerase II promoter), GO:0060333 (interferon-gamma-mediated signaling pat…			0.463786	0.586285		0.09069	-0.255147	-0.139648		-0.285527	-0.348276	-0.112162					166.219	13.1175	11.0984	-1.04126	2.36869	14.9351	0.0023541	0.0546845	0.000360076	0.0956344	0.23887	-0.793725	-0.871852	0.0186875	0.00476837		7.29831	8.12231	5.17945	3.64916	4.12001	3.53144	3.29601	4.23773
ENSG00000272750	AL592148.3	As						0.728609	0.386482		0.107079	-0.133951	-0.337065		-0.255526	-0.224158	-0.271469					165.613	34.1302	86.1844	-0.923988	3.51699	16.0202	0.00184158	0.0503687	0.000292657	0.119433	0.23887	-0.718132	-0.828217	0.0448173	0.0110963		19.1875	14.7143	11.7715	9.65261	8.12231	8.71089	8.94632	8.59317
ENSG00000129003	VPS13C	PC	vacuolar protein sorting 13 homolog C	This gene encodes a member of the vacuolar protein sorting-associated 13 gene family. Alternate splicing results in multiple transcript variants. [provided by RefSeq, Oct 2010].	GO:0006895 (Golgi to endosome transport), GO:0007005 (mitochondrion organization), GO:1905090 (NA), GO:0005737 (cytoplasm), GO:0005741 (mitochondrial outer membrane), GO:0005829 (cytosol), GO:0070062 (extracellular vesicular exosome)			-0.438093	-0.28605		-0.148515	-0.116086	0.147001		0.199477	0.392154	0.250112					165.592	7.18066	99.2501	0.996852	2.02711	13.0033	0.00374867	0.0661992	0.00134608	0.0439369	0.23887	0.944911	0.917887	0.000400878	0.00130029		2.23658	2.70744	3.1783	3.29601	4.35544	4.59087	5.53259	4.8263
ENSG00000166794	PPIB	PC	peptidylprolyl isomerase B	The protein encoded by this gene is a cyclosporine-binding protein and is mainly located within the endoplasmic reticulum. It is associated with the secretory pathway and released in biological fluids. This protein can bind to cells derived from T- and B-lymphocytes, and may regulate cyclosporine A-mediated immunosuppression. Variants have been identified in this protein that give rise to recessi…	GO:0000413 (protein peptidyl-prolyl isomerization), GO:0040018 (positive regulation of multicellular organism growth), GO:0044794 (positive regulation by host of viral process), GO:0044829 (positive regulation by host of viral genome replication), GO:0050821 (protein stabilization), GO:0060348 (bone development), GO:0061077 (chaperone-mediated protein folding), GO:0005634 (nucleus), GO:0005783 (e…			0.170808	0.182862		0.0155776	0.038291	0.010004		-0.229131	-0.0870486	-0.101363					165.508	98.4739	17.3269	-0.315698	9.61954	12.9933	0.00375811	0.0662549	0.00528402	0.0439369	0.23887	-0.944911	-0.96026	0.000400878	0.000152257		881.919	889.335	791.749	804.345	788.688	667.913	737.247	729.949
ENSG00000049323	LTBP1	PC	latent transforming growth factor beta binding protein 1	The protein encoded by this gene belongs to the family of latent TGF-beta binding proteins (LTBPs). The secretion and activation of TGF-betas is regulated by their association with latency-associated proteins and with latent TGF-beta binding proteins. The product of this gene targets latent complexes of transforming growth factor beta to the extracellular matrix, where the latent cytokine is subs…	hsa04350 (TGF-beta signaling pathway), GO:0003281 (ventricular septum development), GO:0007178 (transmembrane receptor protein serine/threonine kinase signaling pathway), GO:0035583 (sequestering of TGFbeta in extracellular matrix), GO:0035904 (aorta development), GO:0060976 (coronary vasculature development), GO:0001527 (microfibril), GO:0005576 (extracellular region), GO:0005578 (proteinaceous …			-0.646501	-0.161029		0.0114508	-0.0614859	0.0613794		0.393108	0.192632	0.210445					165.343	41.7872	85.7786	0.730621	3.92039	12.9734	0.00377693	0.0663803	0.00139358	0.0439369	0.23887	0.944911	0.898946	0.000400878	0.00238828		8.59317	12.8309	14.7143	13.8903	15.3029	19.7761	16.9509	17.1863
ENSG00000198712	MT-CO2	PC	mitochondrially encoded cytochrome c oxidase II		hsa00190 (Oxidative phosphorylation), hsa01100 (Metabolic pathways), hsa04260 (Cardiac muscle contraction), hsa04714 (Thermogenesis), hsa04932 (Non-alcoholic fatty liver disease (NAFLD)), hsa05010 (Alzheimer disease), hsa05012 (Parkinson disease), hsa05016 (Huntington disease), R-HSA-1428517 (Homo sapiens: The citric acid (TCA) cycle and respiratory electron transport), R-HSA-1430728 (Homo sapien…			0.836098	0.668772		-0.285313	-0.191462	-0.332148		-0.234954	-0.251472	-0.209519					165.133	99.9647	8.8487	-0.918686	13.2371	21.1966	0.000647652	0.0334263	1.96472e-05	0.119433	0.23887	-0.491354	-0.809269	0.216255	0.0149596		16377.9	14584.1	7526.91	8032.97	7286.42	7794.36	7705.6	7933.03
ENSG00000100504	PYGL	PC	glycogen phosphorylase L	This gene encodes a homodimeric protein that catalyses the cleavage of alpha-1,4-glucosidic bonds to release glucose-1-phosphate from liver glycogen stores. This protein switches from inactive phosphorylase B to active phosphorylase A by phosphorylation of serine residue 15. Activity of this enzyme is further regulated by multiple allosteric effectors and hormonal controls. Humans have three glyc…	hsa00500 (Starch and sucrose metabolism), hsa01100 (Metabolic pathways), hsa04217 (Necroptosis), hsa04910 (Insulin signaling pathway), hsa04922 (Glucagon signaling pathway), hsa04931 (Insulin resistance), GO:0005977 (glycogen metabolic process), GO:0005980 (glycogen catabolic process), GO:0006015 (5-phosphoribose 1-diphosphate biosynthetic process), GO:0042593 (glucose homeostasis), GO:0043312 (n…			0.381753	0.208482		-0.0751925	-0.079869	-0.0879213		-0.0892678	-0.1103	-0.147685					164.854	94.7777	62.3026	-0.391491	8.06937	12.9148	0.00383309	0.0664879	0.00290627	0.0439369	0.23887	-0.944911	-0.835441	0.000400878	0.00981073		347.494	307.942	252.616	251.792	250.379	250.144	246.495	240.138
ENSG00000150630	VEGFC	PC	vascular endothelial growth factor C	The protein encoded by this gene is a member of the platelet-derived growth factor/vascular endothelial growth factor (PDGF/VEGF) family. The encoded protein promotes angiogenesis and endothelial cell growth, and can also affect the permeability of blood vessels. The proprotein is further cleaved into a fully processed form that can bind and activate VEGFR-2 and VEGFR-3 receptors. [provided by Re…	hsa04010 (MAPK signaling pathway), hsa04014 (Ras signaling pathway), hsa04015 (Rap1 signaling pathway), hsa04151 (PI3K-Akt signaling pathway), hsa04510 (Focal adhesion), hsa04668 (TNF signaling pathway), hsa04926 (Relaxin signaling pathway), hsa04933 (AGE-RAGE signaling pathway in diabetic complications), hsa05200 (Pathways in cancer), GO:0001525 (angiogenesis), GO:0001666 (response to hypoxia), …			0.491117	0.133487		-0.0494612	0.142347	-0.128961		-0.251268	-0.157673	-0.179588					164.743	72.036	48.8487	-0.528619	5.67782	13.6	0.00323356	0.0625337	0.00168153	0.0621765	0.23887	-0.881917	-0.82579	0.00376031	0.0115509		71.4528	55.3259	48.4985	55.6791	45.791	41.9064	44.8493	44.143
ENSG00000243279	PRAF2	PC	PRA1 domain family member 2		GO:0015031 (protein transport), GO:0015813 (L-glutamate transport), GO:0010008 (endosome membrane), GO:0016021 (integral component of membrane)			0.399689	0.152642		-0.0299102	0.0442374	-0.11582		-0.179316	-0.169612	-0.101911					164.587	86.9884	15.5801	-0.424127	6.87951	13.7301	0.00313259	0.0622659	0.00225589	0.0685251	0.23887	-0.869318	-0.855019	0.00504681	0.00681417		154.324	129.722	114.066	120.187	107.356	102.647	103.354	108.415
ENSG00000168724	DNAJC21	PC	DnaJ heat shock protein family (Hsp40) member C21		GO:0006457 (protein folding), GO:0005730 (nucleolus), GO:0005840 (ribosome), GO:0003723 (RNA binding), GO:0005515 (protein binding), GO:0008270 (zinc ion binding)			1.13214	0.636516		-0.604885	-0.216794	-0.150296		-0.244276	-0.38248	-0.169925					164.585	59.2272	78.6502	-1.17745	4.88993	17.2569	0.00140929	0.0456447	7.92095e-05	0.133469	0.23887	-0.64254	-0.763368	0.085764	0.0275246		61.5648	43.0836	17.0686	22.9544	24.1315	22.4835	20.2469	23.7784
ENSG00000184867	ARMCX2	PC	armadillo repeat containing X-linked 2	This gene encodes a protein containing a potential N-terminal transmembrane domain and multiple armadillo (arm) repeats. Proteins containing arm repeats are involved in development, maintenance of tissue integrity, and tumorigenesis. This gene is located in a cluster of related genes on chromosome X. There is a pseudogene for this gene on chromosome 7. Alternative splicing in the 5_ UTR results i…	GO:0016021 (integral component of membrane)			0.28852	1.38441		-0.237132	-0.369894	-0.130211		-0.506538	-0.269195	-0.15996					164.583	55.8045	30.0485	-1.27755	4.70045	15.87	0.00190405	0.0507622	0.000132166	0.119433	0.23887	-0.718132	-0.680727	0.0448173	0.0631245		28.8401	63.9191	19.4229	17.5395	21.0709	15.7738	18.9521	20.6001
ENSG00000173039	RELA	PC	RELA proto-oncogene, NF-kB subunit	NF-kappa-B is a ubiquitous transcription factor involved in several biological processes. It is held in the cytoplasm in an inactive state by specific inhibitors. Upon degradation of the inhibitor, NF-kappa-B moves to the nucleus and activates transcription of specific genes. NF-kappa-B is composed of NFKB1 or NFKB2 bound to either REL, RELA, or RELB. The most abundant form of NF-kappa-B is NFKB1…	hsa01523 (Antifolate resistance), hsa04010 (MAPK signaling pathway), hsa04014 (Ras signaling pathway), hsa04024 (cAMP signaling pathway), hsa04062 (Chemokine signaling pathway), hsa04064 (NF-kappa B signaling pathway), hsa04066 (HIF-1 signaling pathway), hsa04071 (Sphingolipid signaling pathway), hsa04137 (Mitophagy - animal), hsa04151 (PI3K-Akt signaling pathway), hsa04210 (Apoptosis), hsa04211 …			-0.189574	-0.314246		-0.00136875	0.0783813	0.0324823		0.142726	0.0920656	0.159534					164.573	90.8963	32.7922	0.371234	7.34825	12.881	0.00386588	0.0664879	0.0041656	0.0439369	0.23887	0.944911	0.928356	0.000400878	0.000870648		141.611	129.722	161.622	170.922	165.507	178.809	172.57	180.927
ENSG00000085365	SCAMP1	PC	secretory carrier membrane protein 1	This gene product belongs to the SCAMP family of proteins, which are secretory carrier membrane proteins. They function as carriers to the cell surface in post-golgi recycling pathways. Different family members are highly related products of distinct genes, and are usually expressed together. These findings suggest that these protein family members may function at the same site during vesicular t…	GO:0006892 (post-Golgi vesicle-mediated transport), GO:0015031 (protein transport), GO:0043312 (neutrophil degranulation), GO:0005802 (trans-Golgi network), GO:0005886 (plasma membrane), GO:0016021 (integral component of membrane), GO:0030136 (clathrin-coated vesicle), GO:0030672 (synaptic vesicle membrane), GO:0035579 (specific granule membrane), GO:0042589 (zymogen granule membrane), GO:0055038…			0.0322422	1.07542		-0.0579694	-0.0579694	-0.0579694		-0.339789	-0.105283	-0.488683					164.555	18.1016	71.4865	-1.22984	2.64468	12.6402	0.00410943	0.0682785	0.000920779	0.0375813	0.23887	-0.968246	-0.686328	7.81522e-05	0.0601432		5.76802	14.008	5.29716	5.29716	5.29716	4.0023	5.06173	3.41373
ENSG00000122591	FAM126A	PC	family with sequence similarity 126 member A	The protein encoded by this gene may play a part in the beta-catenin/Lef signaling pathway. Expression of this gene is down-regulated by beta-catenin. Defects in this gene are a cause of hypomyelination with congenital cataract (HCC). [provided by RefSeq, Oct 2008].	GO:0007165 (signal transduction), GO:0042552 (myelination), GO:0046854 (phosphatidylinositol phosphorylation), GO:0090002 (establishment of protein localization to plasma membrane), GO:0005829 (cytosol), GO:0005886 (plasma membrane), GO:0043005 (neuron projection), GO:0004871 (signal transducer activity), GO:0005515 (protein binding)			-0.793574	-0.321378		0.033788	-0.103741	-0.288204		1.19508	0.381766	-0.103741					164.408	12.7382	89.1045	1.71183	2.34799	14.1147	0.00285505	0.059935	0.000300739	0.0796494	0.23887	0.836516	0.666992	0.00962802	0.0707993		1.64801	3.06058	4.47316	3.88458	3.1783	12.4778	6.23888	3.88458
ENSG00000230043	TMSB4XP6	p_Pg	TMSB4X pseudogene 6					-0.434659	-0.839151		0.0735809	-0.0437947	0.117982		0.516583	-0.0935562	0.703015					164.369	16.055	0.723423	1.41956	2.52439	15.839	0.00191726	0.0507622	0.000176274	0.119433	0.23887	0.718132	0.815406	0.0448173	0.0136283		3.29601	2.00115	5.53259	4.94402	5.76802	8.24003	4.70859	9.65261
ENSG00000188070	C11orf95	PC	chromosome 11 open reading frame 95		GO:0003676 (nucleic acid binding)			-0.1752	-0.520352		0.0827194	-0.00731608	-0.0182876		0.344906	0.0878446	0.205685					164.332	59.4301	70.7896	0.577983	4.90205	12.8522	0.00389412	0.0665392	0.00209088	0.0439369	0.23887	0.944911	0.884845	0.000400878	0.00349545		25.6618	19.7761	31.0767	29.0755	28.8401	37.6687	31.1944	34.0195
ENSG00000169432	SCN9A	PC	sodium voltage-gated channel alpha subunit 9	This gene encodes a voltage-gated sodium channel which plays a significant role in nociception signaling. Mutations in this gene have been associated with primary erythermalgia, channelopathy-associated insensitivity to pain, and paroxysmal extreme pain disorder. [provided by RefSeq, Aug 2009]. Sequence Note: This RefSeq record was created from transcript and genomic sequence data to make the seq…	hsa04742 (Taste transduction), GO:0006814 (sodium ion transport), GO:0006954 (inflammatory response), GO:0009636 (response to toxic substance), GO:0009791 (post-embryonic development), GO:0019228 (neuronal action potential), GO:0019233 (sensory perception of pain), GO:0034765 (regulation of ion transmembrane transport), GO:0035725 (sodium ion transmembrane transport), GO:0048266 (behavioral respo…			-0.147266	-0.672625		-0.101166	0.0122222	0.101662		0.406156	0.178423	0.222593					164.163	47.4065	98.1209	0.720653	4.22738	12.8319	0.00391416	0.0666991	0.00141226	0.0439369	0.23887	0.944911	0.878504	0.000400878	0.00408499		16.1269	10.5943	16.7155	18.2458	19.5406	24.6024	20.7178	21.4241
ENSG00000115758	ODC1	PC	ornithine decarboxylase 1	This gene encodes the rate-limiting enzyme of the polyamine biosynthesis pathway which catalyzes ornithine to putrescine. The activity level for the enzyme varies in response to growth-promoting stimuli and exhibits a high turnover rate in comparison to other mammalian proteins. Originally localized to both chromosomes 2 and 7, the gene encoding this enzyme has been determined to be located on 2p…	hsa00330 (Arginine and proline metabolism), hsa00480 (Glutathione metabolism), hsa01100 (Metabolic pathways), GO:0001822 (kidney development), GO:0006521 (regulation of cellular amino acid metabolic process), GO:0006595 (polyamine metabolic process), GO:0008284 (positive regulation of cell proliferation), GO:0009615 (response to virus), GO:0033387 (putrescine biosynthetic process from ornithine),…			0.268009	0.11695		0.00563935	0.0158008	0.00386481		-0.170507	-0.17452	-0.065238					164.125	96.5861	50.3749	-0.328854	8.57564	12.8274	0.00391863	0.0666991	0.005001	0.0439369	0.23887	-0.944911	-0.923701	0.000400878	0.00104788		457.439	411.766	381.042	383.75	380.572	337.017	336.075	362.679
ENSG00000137203	TFAP2A	PC	transcription factor AP-2 alpha	The protein encoded by this gene is a transcription factor that binds the consensus sequence 5_-GCCNNNGGC-3_. The encoded protein functions as either a homodimer or as a heterodimer with similar family members. This protein activates the transcription of some genes while inhibiting the transcription of others. Defects in this gene are a cause of branchiooculofacial syndrome (BOFS). Three transcri…	GO:0000122 (negative regulation of transcription from RNA polymerase II promoter), GO:0001822 (kidney development), GO:0003404 (optic vesicle morphogenesis), GO:0003409 (optic cup structural organization), GO:0006357 (regulation of transcription from RNA polymerase II promoter), GO:0006366 (transcription from RNA polymerase II promoter), GO:0007605 (sensory perception of sound), GO:0008285 (negat…			0.226372	0.687452		-0.195527	0.0723539	-0.0790537		-0.480731	-0.265109	0.0342424					164.088	87.4382	46.7843	-0.681634	6.92895	14.6456	0.00251805	0.0564156	0.000465654	0.0956344	0.23887	-0.793725	-0.771755	0.0186875	0.02487		138.668	191.64	103	124.424	111.829	84.166	98.0563	121.128
[truncated: 10,871 more rows]
