# Supplementary material for: Effects of Siberian fir terpenes extract Abisil on antioxidant activity, autophagy, transcriptome and proteome of human fibroblasts
Source: Aging (Albany NY). 2021 Aug 24;13(16):20050–80. doi: 10.18632/aging.203448 (PMC8436938; doi:10.18632/aging.203448)
Supplement: Supplementary Table 5 [file aging-13-203448-s006.xlsx]

## Sheet: top 40 upreg
Supplementary Table 5. The results of Gene Ontology (biological processes) enrichment analysis for top 80, 250, 500 and 1000 up- or downregulated genes for the comparison of samples treated with low-concentration Abisil (5 µg/ml) to control non-treated samples.
GO id	Term	Genes in genome (background)	Genes in top-40 upreg	Expected genes in top-40 upreg	Rank in P.Fisher.elim	P.Fisher	P.Fisher.elim	FDR.Fisher	FDR.Fisher.elim	Description	Avg.LogFC for top-10 upreg	Avg.LogFC for top-10 downreg	Upreg genes (LogFC > 0.4)	Downreg genes (LogFC < -0.4)
GO:0043085	positive regulation of catalytic activit...	951	12	3.65	36	0.00013	0.00963	0.85	1	Any process that activates or increases the activity of an enzyme	1.18495	-1.72757	NOXA1, ADAM8, LRP8, CCNK, PSMA6, PIDD1, PRKAR1B, IKBKG, PREX1, FZD8, ARAP1, RGS12, FGFR3, TGFB1, MAPK11, WRAP53, CSF1, SBF1, CDK20, RGS3, CTSH, DENND4A, RAPGEF1, APOE, PLXNB1, ANAPC2, RANGAP1, GAS6, CSPG4, MADD, SCRIB, PLEKHG4, MAGED1, PSMB10, ARHGEF10L, PTPA, VPS9D1, PLEKHG3, STK11, ZNF16, AGAP6, RABEP2, TBC1D22A, MAPK12, RAP1GAP2, GCLM, TRAPPC9, ARHGEF19, S1PR2, MAPT, LAMTOR4, KIF14, RALGDS, C1…	ITGB1, ARRDC3, PSMD5, DCUN1D4, AGFG1, PTGES3, WDR35, UBE2N, POT1, RPGR, PDCD10, LINC02210-CRHR1, OPHN1, PDGFD, TIAM2, GPRC5B, DVL3, HSP90AA1, ARL6IP5, FBXO8, PFN2, DNAJA1, PIBF1, MNAT1, SUMO1, ADNP, MAP3K20, DNM1L, HSPH1, EIF2AK2, PSMD12, DCUN1D5, ASAP2, PDGFRA, TRAPPC6B, DEPDC7, SNX13, PSMA4, PSMC6, PPP2R3C, AC091057.1, MAP3K1, AZIN1, PRKACB, RCBTB2, CDC27, TOPORS, CARD8, CDC23, DBF4, PKD2, MAP4…
GO:0044093	positive regulation of molecular functio...	1141	13	4.38	1029	0.00017	0.41501	0.85	1	Any process that activates or increases the rate or extent of a molecular function, an elemental biological activity occurring at the molecular level, such as catalysis or binding	1.18495	-1.81873	NOXA1, ADAM8, LRP8, CCNK, PSMA6, PIDD1, PRKAR1B, IKBKG, PREX1, FZD8, CRTC1, ARAP1, RGS12, HTT, FGFR3, TGFB1, MAPK11, WRAP53, CSF1, SBF1, CDK20, RGS3, CTSH, DENND4A, RAPGEF1, APOE, PLXNB1, ANAPC2, RANGAP1, GAS6, CSPG4, MADD, CDK9, SCRIB, PLEKHG4, SPHK1, MAGED1, SPPL3, PSMB10, ARHGEF10L, PTPA, VPS9D1, PLEKHG3, STK11, ZNF16, TICAM1, RFNG, AGAP6, RABEP2, TBC1D22A, MAPK12, RAP1GAP2, GCLM, TRAPPC9, JPH…	ITGB1, FAM220A, ARRDC3, PSMD5, DCUN1D4, AGFG1, PTGES3, WDR35, EIF3E, TERF2IP, UBE2N, POT1, RPGR, PDCD10, LINC02210-CRHR1, OPHN1, PDGFD, TIAM2, GPRC5B, DVL3, HSP90AA1, ARL6IP5, FBXO8, PFN2, DNAJA1, PIBF1, MNAT1, SUMO1, ADNP, MAP3K20, DNM1L, HSPH1, EIF2AK2, PSMD12, NPM1, DCUN1D5, ASAP2, PDGFRA, TRAPPC6B, DEPDC7, SNX13, PSMA4, CLOCK, PSMC6, PPP2R3C, AC091057.1, MAP3K1, AZIN1, PRKACB, RCBTB2, MBTPS2,…
GO:0007219	Notch signaling pathway	83	4	0.32	47	0.00027	0.01246	0.9	1	A series of molecular signals initiated by the binding of an extracellular ligand to the receptor Notch on the surface of a target cell, and ending with regulation of a downstream cellular process, e.g. transcription	0.806866	-1.02633	NEURL1B, NOTCH1, TGFB1, GDPD5, TBX2, RFNG, FAM129B, EGFL7, RPS19, UBC, MIB2, CBFA2T2, SLC35C2, HHEX, POFUT1, DTX3, EPN1, PSEN2, LFNG	IFT74, NOV, PDCD10, RBPJ, KAT2B, FBXW7, CDKN1B, NOTCH2, ZMIZ1, SYNJ2BP, BMP2K, NCSTN, BCL6, SNW1, CD46, EP300, ADAM10, NEPRO
GO:0043065	positive regulation of apoptotic process	378	7	1.45	1	0.00048	0.00048	1	1	Any process that activates or increases the frequency, rate or extent of cell death by apoptotic process	1.10799	-1.59944	OSGIN1, ADAM8, PIDD1, PREX1, NOTCH1, HTT, TGFB1, HMOX1, TSPO, AKR1C3, BIN1, DAPK3, CTSH, CLIP3, SCRIB, HYAL2, MAGED1, PTPA, CDK19, ARHGEF19, MAPT, ARHGEF4, VAV2, PPM1F, DAB2IP, APBB1, UBC, TNFSF12, AKAP13, COL18A1, HSF1, NFATC4, RASSF2, TFAP4, TRADD, AIFM2, CAPN10, NQO1, BCL2L1, ADAMTSL4, PLEKHG5, MAP3K11, PLEKHF1, TRIO, PPP3R1, BID, MAPK9, NLRP3, BBC3, BAD, TIAM1, MUL1, BAK1, PDGFRB, SMPD1, PSEN…	ITGB1, BNIP3L, EEF1E1, ITGB3BP, WDR35, TIAM2, ARL6IP5, YWHAZ, DNAJA1, MAP3K20, RARB, DNM1L, CREB1, CARD8, PRNP, STK3, FBXW7, CYP1B1, GNA13, PRKRA, MAP2K4, WNT5A, YWHAH, DYNLL2, SOS2, CDKN1B, ITGA6, SIRT1, MFF, ATF2, NCK1, EIF2S1, ING3, TGFB2, LATS2, PPID, SERINC3, CDC42, SENP1, NKX3-1, NET1, PDCD5, LYN, SHQ1, ECT2, STK4, REST, TNFAIP8, NCSTN, HSPD1, TFAP2A, GSDME, ATM, BCL6, ZC3H8, PRKCI, CASP2, …
GO:0043068	positive regulation of programmed cell d...	381	7	1.46	1447	0.00051	1	1	1	Any process that activates or increases the frequency, rate or extent of programmed cell death, cell death resulting from activation of endogenous cellular processes	1.10799	-1.59944	OSGIN1, ADAM8, PIDD1, PREX1, NOTCH1, HTT, TGFB1, HMOX1, TSPO, AKR1C3, BIN1, DAPK3, CTSH, CLIP3, SCRIB, HYAL2, MAGED1, PTPA, CDK19, ARHGEF19, MAPT, ARHGEF4, VAV2, PPM1F, DAB2IP, APBB1, UBC, TNFSF12, AKAP13, COL18A1, HSF1, NFATC4, RASSF2, TFAP4, TRADD, AIFM2, CAPN10, NQO1, BCL2L1, ADAMTSL4, PLEKHG5, MAP3K11, PLEKHF1, TRIO, PPP3R1, BID, MAPK9, NLRP3, BBC3, BAD, TIAM1, MUL1, BAK1, PDGFRB, SMPD1, PSEN…	ITGB1, BNIP3L, EEF1E1, ITGB3BP, WDR35, TIAM2, ARL6IP5, YWHAZ, DNAJA1, MAP3K20, RARB, DNM1L, CREB1, CARD8, PRNP, STK3, FBXW7, CYP1B1, GNA13, PRKRA, MAP2K4, WNT5A, YWHAH, DYNLL2, SOS2, CDKN1B, ITGA6, SIRT1, MFF, ATF2, NCK1, EIF2S1, ING3, TGFB2, LATS2, PPID, SERINC3, CDC42, SENP1, NKX3-1, NET1, PDCD5, LYN, SHQ1, ECT2, STK4, REST, TNFAIP8, NCSTN, HSPD1, TFAP2A, GSDME, ATM, BCL6, ZC3H8, PRKCI, CASP2, …
GO:0010942	positive regulation of cell death	396	7	1.52	1448	0.00064	1	1	1	Any process that increases the rate or frequency of cell death. Cell death is the specific activation or halting of processes within a cell so that its vital functions markedly cease, rather than simply deteriorating gradually over time, which culminates in cell death	1.10799	-1.59944	OSGIN1, ADAM8, PIDD1, PREX1, NOTCH1, HTT, TGFB1, HMOX1, TSPO, AKR1C3, BIN1, DAPK3, CTSH, CLIP3, SCRIB, HYAL2, MAGED1, PTPA, CDK19, ARHGEF19, KATNB1, MAPT, ARHGEF4, VAV2, PPM1F, DAB2IP, APBB1, UBC, TNFSF12, AKAP13, COL18A1, HSF1, NFATC4, RASSF2, TFAP4, TRADD, AIFM2, CAPN10, NQO1, BCL2L1, ADAMTSL4, PLEKHG5, MAP3K11, PLEKHF1, TRIO, PPP3R1, BID, MAPK9, NLRP3, BBC3, BAD, TIAM1, MUL1, BAK1, PDGFRB, SMP…	ITGB1, BNIP3L, EEF1E1, ITGB3BP, WDR35, TIAM2, ARL6IP5, YWHAZ, DNAJA1, MAP3K20, RARB, DNM1L, CREB1, CARD8, TRIM13, PRNP, STK3, FBXW7, CYP1B1, GNA13, PRKRA, MAP2K4, PICALM, WNT5A, YWHAH, DYNLL2, SOS2, CDKN1B, ITGA6, SIRT1, MFF, ATF2, NCK1, EIF2S1, ING3, TGFB2, LATS2, PPID, SERINC3, CDC42, SENP1, NKX3-1, NET1, PDCD5, LYN, SHQ1, ECT2, STK4, REST, TNFAIP8, NCSTN, HSPD1, TFAP2A, GSDME, ATM, BCL6, ZC3H8…
GO:0001921	positive regulation of receptor recyclin...	12	2	0.05	2	0.00092	0.00092	1	1	Any process that activates or increases the frequency, rate or extent of receptor recycling	0.142725	-0.144781	ARAP1, SCRIB, ECE1	VAMP3
GO:0000028	ribosomal small subunit assembly	13	2	0.05	3	0.00109	0.00109	1	1	The aggregation, arrangement and bonding together of constituent RNAs and proteins to form the small ribosomal subunit	0.340611	0.0688615	RPSA, RPS19, RPS28, RPS10
GO:0001919	regulation of receptor recycling	17	2	0.07	1449	0.00188	1	1	1	Any process that modulates the frequency, rate, or extent of receptor recycling	0.311181	-0.263032	ARAP1, SCRIB, ECE1	VAMP3
GO:0006928	movement of cell or subcellular componen...	952	10	3.66	149	0.00232	0.03723	1	1	The directed, self-propelled movement of a cellular component without the involvement of an external agent such as a transporter or a pore	1.31272	-1.72883	SPNS2, SEMA6C, ADAM8, TPGS1, BST2, TIE1, PREX1, SLC9B1, ARAP1, ITGB4, NPHP4, NOTCH1, HTT, ELMO3, TGFB1, HMOX1, LAMA2, CERS2, EFNB1, PPIL2, KIF13B, TSPO, SCN1B, AP3D1, CSF1, PGF, ZNF703, DAPK3, CTSH, SOCS7, CDC42BPB, APOE, PLXNB1, TRPM2, GAS6, CSPG4, SCRIB, KIFC3, NEO1, IGFBP5, HYAL2, SPHK1, FLNA, TRPM4, SLC7A11, BOC, FAM129B, BRAT1, CNIH2, MAPT, KIF14, POMGNT2, FSCN1, GPC1, HDAC5, SPECC1L, VAV2, …	ITGB1, CD58, WIPF1, ARPC5, WDR35, COL3A1, NFE2L2, IFT74, NOV, RPGR, PDCD10, OPHN1, FMN2, PDGFD, PIK3R1, CAPZA1, PHLDB2, GJA1, PFN2, DYNC1LI1, CPNE3, DNAJA1, SUMO1, RFFL, HSPB11, PDGFRA, RYK, RNF20, RTN4, CREB1, ICK, RAB6A, ITGA4, PALLD, MYLK, TNPO1, PTPRK, PSG1, CCNYL1, SPAG9, DLGAP5, IQGAP1, MCC, MATN2, CLIC4, AL049697.1, CYP1B1, GNA13, HAS2, EFNB2, RAB11A, EPHA4, IL1B, ASPM, ARF4, CD47, DPYSL2,…
GO:0045742	positive regulation of epidermal growth ...	19	2	0.07	4	0.00235	0.00235	1	1	Any process that activates or increases the frequency, rate or extent of epidermal growth factor receptor signaling pathway activity	0.460381	-0.120462	ARAP1, UBC, CBL, PDE6G	FBXW7, AFAP1L2
GO:0065009	regulation of molecular function	1713	14	6.58	1262	0.00275	0.6407	1	1	Any process that modulates the frequency, rate or extent of a molecular function, an elemental biological activity occurring at the molecular level, such as catalysis or binding	1.25763	-1.95957	WDR81, NOXA1, ADAM8, BST2, LMTK3, LRP8, CCNK, PSMA6, PIDD1, PRKAR1B, IKBKG, WFIKKN1, PREX1, FZD8, CRTC1, ARAP1, STMN3, SUFU, RGS12, NOTCH1, HTT, FGFR3, TGFB1, HMOX1, MAPK11, SCN1B, WRAP53, SZT2, NEIL1, CSF1, SBF1, CTNNBIP1, CDK20, RGS3, CTSH, DENND4A, CBARP, RAPGEF1, SOCS7, GFI1, PKMYT1, GPSM1, GLIS2, APOE, PLXNB1, ANAPC2, RANGAP1, RNH1, GAS6, CSPG4, MADD, CDK9, SCRIB, PLEKHG4, HYAL2, SPHK1, MAGE…	ITGB1, ZNF675, FAM220A, CCNG1, ARRDC3, PSMD5, DCUN1D4, CAMK2N1, AGFG1, PPT1, PTGES3, UCHL5, WDR35, EIF3E, UTRN, TERF2IP, UBE2N, POT1, NETO2, RPGR, PDCD10, LINC02210-CRHR1, OPHN1, PDGFD, PIK3R1, PPP2R5E, TIAM2, GPRC5B, GJA1, DVL3, HSP90AA1, KDM5A, ARL6IP5, FBXO8, PFN2, NIFK, DNAJA1, PIBF1, MNAT1, SUMO1, ADNP, MAP3K20, DNM1L, RFFL, HSPH1, EIF2AK2, PSMD12, NPM1, DCUN1D5, ARPP19, ASAP2, MED13, PDGFRA…
GO:1901186	positive regulation of ERBB signaling pa...	21	2	0.08	1450	0.00287	1	1	1	Any process that activates or increases the frequency, rate or extent of ERBB signaling pathway	0.460381	-0.389549	ARAP1, UBC, CBL, PDE6G	RTN4, RBPJ, FBXW7, AFAP1L2
GO:0051345	positive regulation of hydrolase activit...	538	7	2.07	5	0.00376	0.00376	1	1	Any process that activates or increases the frequency, rate or extent of hydrolase activity, the catalysis of the hydrolysis of various bonds	0.94232	-1.54474	PIDD1, PREX1, ARAP1, RGS12, FGFR3, SBF1, RGS3, CTSH, DENND4A, RAPGEF1, PLXNB1, RANGAP1, MADD, SCRIB, PLEKHG4, ARHGEF10L, PTPA, VPS9D1, PLEKHG3, AGAP6, RABEP2, TBC1D22A, MAPK12, RAP1GAP2, TRAPPC9, ARHGEF19, MAPT, LAMTOR4, RALGDS, NR1H2, ARHGEF4, VAV2, PPM1F, DAB2IP, AXIN1, ARHGAP35, GMIP, TBC1D14, TBCD, SIPA1L3, ARFGAP1, RGS20, DEPDC5, AKAP13, DENND3, TBC1D13, TRAPPC6A, DOCK6, PTPN1, GNB5, HRAS, D…	ITGB1, AGFG1, WDR35, POT1, RPGR, OPHN1, TIAM2, DVL3, ARL6IP5, FBXO8, PFN2, DNAJA1, SUMO1, DNM1L, ASAP2, PDGFRA, TRAPPC6B, DEPDC7, SNX13, AC091057.1, RCBTB2, CARD8, DENND6A, IQGAP1, RASA1, ELMOD2, PCNA, AHSA2P, SMAP1, DIS3, GNA13, PPP1R12A, ARF4, ARHGAP5, PICALM, WNT5A, DNAJC2, FAM13B, CHML, SRGAP2C, EIF5, GDI2, SOS2, CDC42EP3, ASPH, CALM2, DOCK11, CDKN1B, ITGA6, SIRT1, MSH6, MET, CYFIP2, AGTR1, M…
GO:0014806	smooth muscle hyperplasia	1	1	0	6	0.00384	0.00384	1	1	A process, occurring in smooth muscle, in which there is an increase in cell number by cell division, often leading to an increase in the size of an organ	0.941532	0.941532	HMOX1
GO:0030037	actin filament reorganization involved i...	1	1	0	7	0.00384	0.00384	1	1	The cell cycle process in which rearrangement of the spatial distribution of actin filaments and associated proteins occurs	1.02869	1.02869	ARAP1
GO:0030472	mitotic spindle organization in nucleus	1	1	0	8	0.00384	0.00384	1	1	A process resulting in the assembly, arrangement of constituent parts, or disassembly of the microtubule spindle in the nucleus. The process occurs during a mitotic cell cycle and takes place at the cellular level	0.755587	0.755587	PTPA
GO:0032203	telomere formation via telomerase	1	1	0	9	0.00384	0.00384	1	1	The addition of telomeric repeats to a non-telomeric double-stranded DNA end by telomerase	0.910997	0.910997	WRAP53
GO:0034337	RNA folding	1	1	0	10	0.00384	0.00384	1	1	The process of assisting in the covalent and noncovalent assembly of single or multimeric RNAs into the correct tertiary structure	0.730603	0.730603	FAM129B
GO:0034395	regulation of transcription from RNA pol...	1	1	0	11	0.00384	0.00384	1	1	Any process that modulates the frequency, rate or extent of transcription from an RNA polymerase II promoter in response to an iron stimulus	0.941532	0.941532	HMOX1
GO:0043305	negative regulation of mast cell degranu...	1	1	0	12	0.00384	0.00384	1	1	Any process that stops, prevents, or reduces the rate of mast cell degranulation	0.941532	0.941532	HMOX1
GO:0044028	DNA hypomethylation	1	1	0	1451	0.00384	1	1	1	An decrease in the epigenetic methylation of cytosine and adenosine residues in DNA	0.730603	0.730603	FAM129B
GO:0044029	hypomethylation of CpG island	1	1	0	13	0.00384	0.00384	1	1	An decrease in the epigenetic methylation of cytosine and adenosine residues in a CpG island in DNA. CpG islands are genomic regions that contain a high frequency of the CG dinucleotide and are often associated with the transcription start site of genes	0.730603	0.730603	FAM129B
GO:0060265	positive regulation of respiratory burst...	1	1	0	14	0.00384	0.00384	1	1	Any process that increases the rate, frequency or extent of a phase of elevated metabolic activity, during which oxygen consumption increases made as a defense response ; this leads to the production, by an NADH dependent system, of hydrogen peroxide (H2O2), superoxide anions and hydroxyl radicals	0.653523	0.653523	RPS19
GO:0060267	positive regulation of respiratory burst	1	1	0	1452	0.00384	1	1	1	Any process that increases the rate frequency or extent of a phase of elevated metabolic activity, during which oxygen consumption increases; this leads to the production, by an NADH dependent system, of hydrogen peroxide (H2O2), superoxide anions and hydroxyl radicals	0.653523	0.653523	RPS19
GO:0071105	response to interleukin-11	1	1	0	1453	0.00384	1	1	1	Any process that results in a change in state or activity of a cell or an organism (in terms of movement, secretion, enzyme production, gene expression, etc.) as a result of an interleukin-11 stimulus	0.895537	0.895537	SBNO2
GO:0071348	cellular response to interleukin-11	1	1	0	15	0.00384	0.00384	1	1	Any process that results in a change in state or activity of a cell (in terms of movement, secretion, enzyme production, gene expression, etc.) as a result of an interleukin-11 stimulus	0.895537	0.895537	SBNO2
GO:0098968	neurotransmitter receptor transport post...	1	1	0	16	0.00384	0.00384	1	1		0.795556	0.795556	SCRIB
GO:1990823	response to leukemia inhibitory factor	1	1	0	1454	0.00384	1	1	1		0.895537	0.895537	SBNO2
GO:1990830	cellular response to leukemia inhibitory...	1	1	0	17	0.00384	0.00384	1	1		0.895537	0.895537	SBNO2
GO:0001881	receptor recycling	25	2	0.1	1455	0.00406	1	1	1	The process that results in the return of receptor molecules to an active state and an active cellular location after they have been stimulated by a ligand. An active state is when the receptor is ready to receive a signal	0.576137	-0.304999	ARAP1, SCRIB, EHD3, ECE1, LMTK2, PHETA1, PLEKHJ1	VAMP3, ALS2
GO:0050790	regulation of catalytic activity	1392	12	5.35	1456	0.00409	1	1	1	Any process that modulates the activity of an enzyme	1.25763	-1.89845	WDR81, NOXA1, ADAM8, BST2, LMTK3, LRP8, CCNK, PSMA6, PIDD1, PRKAR1B, IKBKG, WFIKKN1, PREX1, FZD8, ARAP1, STMN3, RGS12, NOTCH1, HTT, FGFR3, TGFB1, MAPK11, WRAP53, SZT2, NEIL1, CSF1, SBF1, CDK20, RGS3, CTSH, DENND4A, RAPGEF1, SOCS7, GFI1, PKMYT1, GPSM1, APOE, PLXNB1, ANAPC2, RANGAP1, RNH1, GAS6, CSPG4, MADD, SCRIB, PLEKHG4, HYAL2, MAGED1, PSMB10, ARHGEF10L, CHCHD10, PTPA, VPS9D1, PLEKHG3, STK11, PI…	ITGB1, ZNF675, CCNG1, ARRDC3, PSMD5, DCUN1D4, CAMK2N1, AGFG1, PPT1, PTGES3, UCHL5, WDR35, UBE2N, POT1, RPGR, PDCD10, LINC02210-CRHR1, OPHN1, PDGFD, PIK3R1, PPP2R5E, TIAM2, GPRC5B, DVL3, HSP90AA1, KDM5A, ARL6IP5, FBXO8, PFN2, NIFK, DNAJA1, PIBF1, MNAT1, SUMO1, ADNP, MAP3K20, DNM1L, RFFL, HSPH1, EIF2AK2, PSMD12, NPM1, DCUN1D5, ARPP19, ASAP2, PDGFRA, TRAPPC6B, DEPDC7, SNX13, PSMA4, PSMC6, PPP2R3C, A…
GO:0023056	positive regulation of signaling	879	9	3.38	287	0.00481	0.0716	1	1	Any process that activates, maintains or increases the frequency, rate or extent of a signaling process	1.18536	-1.64965	ADAM8, CARD9, TNFRSF19, BST2, PSMA6, PIDD1, IKBKG, FZD8, CRTC1, ARAP1, NOTCH1, HTT, FGFR3, TGFB1, HMOX1, LAMA2, MAPK11, CSF1, MC1R, AKR1C3, ABCA7, DAPK3, CTSH, RAPGEF1, GFI1, APOE, PLXNB1, FBXL15, GAS6, CSPG4, MADD, SEMA7A, SCRIB, NEO1, IGFBP5, HYAL2, SPHK1, MAGED1, SPPL3, FLNA, PSMB10, TRPM4, S100A4, STK11, TICAM1, RFNG, JPH2, S1PR2, LAMTOR4, C1QTNF2, MAP2K3, DAB2IP, JUP, AXIN1, SEMA4C, UBC, TEL…	ARRDC3, SH3BGRL, PSMD5, EEF1E1, WDR35, TERF2IP, COL3A1, UBE2N, PHIP, NOV, PDCD10, PDGFD, PIK3R1, GPRC5B, GJA1, DVL3, ARL6IP5, YWHAZ, EIF2A, ATP2C1, TMEM33, PIBF1, MAP3K20, DNM1L, EIF2AK2, PSMD12, PDGFRA, RYK, PSMA4, RNF111, RTN4, RBPJ, CDKN2AIP, PSMC6, UBE3A, MAP3K1, CREB1, CDKN2B, TRIM13, MTDH, PKD2, HPSE, MAP4K5, SPAG9, RC3H1, PRNP, IQGAP1, NRK, STK3, GDF6, MAP4K3, FBXW7, PSMA1, LY96, GOLT1B, A…
GO:0008347	glial cell migration	29	2	0.11	18	0.00545	0.00545	1	1	The orderly movement of a glial cell, non-neuronal cells that provide support and nutrition, maintain homeostasis, form myelin, and participate in signal transmission in the nervous system	0.755006	-0.643915	CERS2, TSPO, CSF1, SOCS7, CSPG4, SCRIB, DAB2IP, SUN2, SRGAP2, TIAM1	RTN4, MATN2, EPHA4, SRGAP2C, TGFB2, LAMB1, HEXB
GO:0048522	positive regulation of cellular process	2727	18	10.47	735	0.0058	0.23059	1	1	Any process that activates or increases the frequency, rate or extent of a cellular process, any of those that are carried out at the cellular level, but are not necessarily restricted to a single cell. For example, cell communication occurs among more than one cell, but occurs at the cellular level	1.45254	-1.95018	HTRA1, OSGIN1, SPP1, ADAM8, CARD9, TNFRSF19, BST2, LRP8, CCNK, PSMA6, PIDD1, PRKAR1B, IKBKG, PREX1, BRF1, FZD8, CRTC1, ARAP1, RTEL1, NPHP4, KLF6, EXOSC6, NOTCH1, HTT, TEF, IGFBP2, NPHP1, CROCC, FGFR3, TGFB1, MEF2D, HMOX1, NRF1, LAMA2, MAPK11, EFNB1, TRPV2, TSPO, SCN1B, WRAP53, AP3D1, CSF1, GDPD5, ISG15, PGF, CTNNBIP1, CDK20, CNPY2, SLC35F6, MC1R, AKR1C3, ABCA7, ZNF703, BIN1, DAPK3, ZGLP1, CTSH, P…	ITGB1, CD58, ARRDC3, UBE2D3, SH3BGRL, BNIP3L, ARPC5, PSMD5, DCUN1D4, EEF1E1, ITGB3BP, RNASEH2B, MTBP, PPT1, DYRK1A, PTGES3, RHOQ, WDR35, EIF3E, TERF2IP, THRB, COL3A1, CADM1, STAT1, UBE2N, NFE2L2, ANKRD49, POT1, PHIP, YEATS4, IFT74, MED21, NOV, PDCD10, LINC02210-CRHR1, ZBTB1, PDGFD, PIK3R1, TIAM2, GPRC5B, NUSAP1, PHLDB2, GJA1, DVL3, MKL2, CHMP2B, HSP90AA1, KDM5A, ARL6IP5, PAIP1, GTF2F2, PFN2, MED4…
GO:0051646	mitochondrion localization	30	2	0.12	19	0.00582	0.00582	1	1	Any process in which a mitochondrion or mitochondria are transported to, and/or maintained in, a specific location within the cell	0.513472	-0.493641	CLUH, BRAT1, MAPT, MAP1S, MUL1, KAT2A	DNM1L, LRPPRC, SYNJ2BP, MSTO1, RHOT1
GO:0000462	maturation of SSU-rRNA from tricistronic...	32	2	0.12	407	0.00661	0.10617	1	1	Any process involved in the maturation of a precursor Small SubUnit (SSU) ribosomal RNA (rRNA) molecule into a mature SSU-rRNA molecule from the pre-rRNA molecule originally produced as a tricistronic rRNA transcript that contains the Small Subunit (SSU) rRNA, 5.8S rRNA, and the Large Subunit (LSU) in that order from 5' to 3' along the primary transcript	0.455166	-0.601485	TBL3, RPSA, RPS19, RPS21	UTP3, UTP23, MRPS9, HEATR1, DCAF13, UTP18, RPS24, UTP6
GO:0007049	cell cycle	1284	11	4.93	126	0.00664	0.03362	1	1	The progression of biochemical and morphological phases and events that occur in a cell during successive cell replication or nuclear replication events. Canonically, the cell cycle comprises the replication and segregation of genetic material followed by the division of the cell, but in endocycles or syncytial cells nuclear replication or nuclear division may not be followed by cell division	1.08958	-1.91003	TMEM8B, CCNK, PSMA6, PIDD1, REC8, ARAP1, RTEL1, HTT, CROCC, TGFB1, GDPD5, SSSCA1, LZTS1, CDK20, ZNF703, BIN1, DAPK3, GFI1, PKMYT1, ANAPC2, FBXL15, RANGAP1, GAS6, MADD, RAB11FIP3, CDK9, SCRIB, ATRIP, SPHK1, FLNA, PSMB10, KLHL22, SPIRE2, PTPA, CDK19, STK11, ZNF16, MAU2, PTCH1, USP3, SEPT6, MAPK12, SYCE1L, PARD6A, BOP1, ALMS1, PLK3, KATNB1, LAMTOR4, SEPT9, KIF14, CCNO, SPECC1L, PNPT1, DAB2IP, RASSF1…	ITGB1, CENPQ, CCNG1, GEM, NEDD1, PSMD5, ITGB3BP, CETN2, LRRCC1, RNASEH2B, MTBP, CUL5, TOPBP1, POLE2, PHIP, YEATS4, CETN3, FMN2, ZNF655, NUSAP1, CHMP2B, HSP90AA1, GSPT1, DYNC1LI1, PIBF1, MNAT1, MAP3K20, PRIM1, GSPT2, PSMD12, NPM1, ARPP19, PPP1CC, DDIAS, PSMA4, MYBL1, DYNLT3, CLOCK, UBA3, SMC4, CDC7, PSMC6, CEP55, PRKACB, CENPK, NUP35, CDC27, BUB1, CKAP2, CNOT8, CDKN2B, CDC23, DBF4, HAUS3, ZMYND11,…
GO:0000461	endonucleolytic cleavage to generate mat...	2	1	0.01	20	0.00767	0.00767	1	1	Endonucleolytic cleavage at the 3'-end of the SSU-rRNA from an originally tricistronic rRNA transcript that contained the Small Subunit (SSU) rRNA, the 5.8S rRNA, and the Large Subunit (LSU) rRNA in that order from 5' to 3' along the primary transcript, to produce the mature end of the SSU-rRNA	0.587286	0.587286	RPSA, RPS21
GO:0002536	respiratory burst involved in inflammato...	2	1	0.01	1457	0.00767	1	1	1	A phase of elevated metabolic activity, during which oxygen consumption increases following a stimulus as part of an inflammatory response; this leads to the production, by an NADH dependent system, of hydrogen peroxide (H2O2), superoxide anions and hydroxyl radicals, resulting in an increase in their intracellular or extracellular levels	0.263335	0.263335	RPS19
GO:0005999	xylulose biosynthetic process	2	1	0.01	21	0.00767	0.00767	1	1	The chemical reactions and pathways resulting in the formation of xylulose, the ketopentose threo-2-pentulose	0.412388	0.412388	TKT
GO:0006407	rRNA export from nucleus	2	1	0.01	22	0.00767	0.00767	1	1	The directed movement of rRNA from the nucleus to the cytoplasm; the rRNA is usually in the form of ribonucleoproteins	0.357499	0.357499	RPSA
GO:0006788	heme oxidation	2	1	0.01	23	0.00767	0.00767	1	1	The chemical reactions and pathways resulting in the loss of electrons from one or more atoms in heme	0.482619	0.482619	HMOX1
GO:0014805	smooth muscle adaptation	2	1	0.01	1458	0.00767	1	1	1	Any process in which smooth muscle adapts, with consequent modifications to structural and/or functional phenotypes, in response to a stimulus. Stimuli include contractile activity, loading conditions, substrate supply, and environmental factors. These adaptive events occur in both muscle fibers and associated structures (motoneurons and capillaries), and they involve alterations in regulatory me…	0.0249893	0.0249893	HMOX1	IL1B
GO:0014900	muscle hyperplasia	2	1	0.01	1459	0.00767	1	1	1	A muscle system process that results in an increase in cell number by cell division, often leading to an increase in the size of an organ	0.237333	0.237333	HMOX1	KLF4
GO:0016080	synaptic vesicle targeting	2	1	0.01	24	0.00767	0.00767	1	1	The process in which synaptic vesicles are directed to specific destination membranes, mediated by molecules at the vesicle membrane and target membrane surfaces	0.222928	0.222928	SCRIB
GO:0032764	negative regulation of mast cell cytokin...	2	1	0.01	25	0.00767	0.00767	1	1	Any process that stops, prevents, or reduces the frequency, rate, or extent of mast cell cytokine production	0.204866	0.204866	HMOX1	BCL6
GO:0033007	negative regulation of mast cell activat...	2	1	0.01	1460	0.00767	1	1	1	Any process that stops, prevents, or reduces the frequency, rate, or extent of mast cell activation as part of an immune response	0.430187	0.430187	HMOX1
GO:0033625	positive regulation of integrin activati...	2	1	0.01	26	0.00767	0.00767	1	1	Any process that activates or increases the frequency, rate, or extent of integrin activation	0.52307	0.52307	PIEZO1
GO:0033634	positive regulation of cell-cell adhesio...	2	1	0.01	27	0.00767	0.00767	1	1	Any process that activates or increases the frequency, rate, or extent of cell-cell adhesion mediated by integrin	0.534423	0.534423	PIEZO1
GO:0045218	zonula adherens maintenance	2	1	0.01	28	0.00767	0.00767	1	1	Maintaining the zonula adherens junction, the cell-cell adherens junction formed near the apex of epithelial cells	0.102123	0.102123	KIFC3	PLEKHA7
GO:0046166	glyceraldehyde-3-phosphate biosynthetic ...	2	1	0.01	29	0.00767	0.00767	1	1	The chemical reactions and pathways resulting in the formation of glyceraldehyde-3-phosphate, an important intermediate in glycolysis	0.470662	0.470662	TKT
GO:0051012	microtubule sliding	2	1	0.01	30	0.00767	0.00767	1	1	The movement of one microtubule along another microtubule	-0.0922708	-0.0922708	MAP4	SPAG16
GO:0060264	regulation of respiratory burst involved...	2	1	0.01	1461	0.00767	1	1	1	Any process that modulates the rate, frequency or extent of a phase of elevated metabolic activity, during which oxygen consumption increases made as a defense response ; this leads to the production, by an NADH dependent system, of hydrogen peroxide (H2O2), superoxide anions and hydroxyl radicals	0.263335	0.263335	RPS19
GO:0060266	negative regulation of respiratory burst...	2	1	0.01	31	0.00767	0.00767	1	1	Any process that decreases the rate, frequency or extent of a phase of elevated metabolic activity, during which oxygen consumption increases made as a defense response ; this leads to the production, by an NADH dependent system, of hydrogen peroxide (H2O2), superoxide anions and hydroxyl radicals	0.263335	0.263335	RPS19
GO:0071896	protein localization to adherens junctio...	2	1	0.01	32	0.00767	0.00767	1	1	Any process in which a protein is transported to, and/or maintained at the adherens junction	0.443019	0.443019	SCRIB
GO:1902856	negative regulation of non-motile cilium...	2	1	0.01	33	0.00767	0.00767	1	1	Any process that stops, prevents or reduces the frequency, rate or extent of nonmotile primary cilium assembly	0.458874	0.458874	MAP4
GO:0006915	apoptotic process	1126	10	4.32	1034	0.00784	0.41928	1	1	A programmed cell death process which begins when a cell receives an internal (e.g. DNA damage) or external signal (e.g. an extracellular death ligand), and proceeds through a series of biochemical events (signaling pathway phase) which trigger an execution phase. The execution phase is the last step of an apoptotic process, and is typically characterized by rounding-up of the cell, retraction of…	1.53921	-1.81184	CRYAB, OSGIN1, APLP1, ADAM8, CARD9, TNFRSF19, AL928654.3, PIDD1, IKBKG, PREX1, EGLN2, NOTCH1, HTT, ELMO3, FGFR3, TGFB1, MEF2D, HMOX1, TSPO, TNFRSF25, SLC35F6, AKR1C3, BIN1, DAPK3, CTSH, HS1BP3, MTFP1, CLIP3, APOE, ATAD3A, GAS6, MADD, SCX, SCRIB, STK40, SIVA1, HYAL2, SPHK1, MAGED1, FLNA, RPL10, PTPA, THRA, CDK19, STK11, ZNF16, NME3, TICAM1, FAM129B, BCL7C, PACS2, GCLM, BRAT1, ARHGEF19, PLK3, MAPT,…	ITGB1, UBE2D3, BNIP3L, HIGD1A, EEF1E1, ITGB3BP, PPT1, DRAM2, CUL5, WDR35, CADM1, STAT1, NFE2L2, PHIP, PDCD10, TNFRSF11B, FMN2, PIK3R1, TIAM2, GJA1, ARL6IP5, RASSF3, YWHAZ, MRPS30, DNAJA1, MNAT1, ADNP, SLTM, MAP3K20, RARB, DNM1L, RFFL, HSPH1, EIF2AK2, NPM1, EBAG9, DDIAS, RTN4, GGCT, GPAM, MAP3K1, CREB1, FAIM, KRCC1, BUB1, CKAP2, TOPORS, CARD8, ZMYND11, TAF9, PDCD6IP, MTDH, NAE1, GULP1, RRM2B, STRA…
GO:1902041	regulation of extrinsic apoptotic signal...	35	2	0.13	34	0.00787	0.00787	1	1	Any process that modulates the frequency, rate or extent of extrinsic apoptotic signaling pathway via death domain receptors	0.54543	-0.495152	PIDD1, HMOX1, MADD, TRADD, BCL2L1	RFFL, STK3, STK4, TNFAIP3
GO:0008593	regulation of Notch signaling pathway	36	2	0.14	35	0.00831	0.00831	1	1	Any process that modulates the frequency, rate or extent of the Notch signaling pathway	0.63445	-0.74283	NOTCH1, GDPD5, RFNG, FAM129B, EGFL7, CBFA2T2, SLC35C2, LFNG	NOV, PDCD10, FBXW7, ZMIZ1, SYNJ2BP, BMP2K, BCL6, CD46, NEPRO
GO:0048519	negative regulation of biological proces...	2815	18	10.81	161	0.00836	0.03901	1	1	Any process that stops, prevents, or reduces the frequency, rate or extent of a biological process. Biological processes are regulated by many means; examples include the control of gene expression, protein modification or interaction with a protein or substrate molecule	1.81046	-2.00252	CRYAB, HTRA1, IGFBP7, OSGIN1, SPP1, WDR81, APLP1, LAG3, ADAM8, BST2, LMTK3, TIE1, LRP8, CCNK, PSMA6, ADAMTS1, PIDD1, PRKAR1B, IKBKG, WFIKKN1, KLF16, PREX1, FZD8, CRTC1, ARAP1, VILL, STMN3, RTEL1, SUFU, RGS12, NPHP4, HES6, EXOSC6, NOTCH1, HTT, IGFBP2, FGFR3, TGFB1, HMOX1, MAPK11, CERS2, TSPO, SZT2, NEIL1, SBNO2, GDPD5, ISG15, LZTS1, ZNF219, CTNNBIP1, CNPY2, SLC35F6, MC1R, AKR1C3, ABCA7, RGS3, ZNF7…	ITGB1, ZNF675, FAM220A, ARRDC3, UBE2D3, BNIP3L, HIGD1A, PSMD5, CAMK2N1, EEF1E1, BCHE, RNASEH2B, MTBP, PPT1, DYRK1A, RHOQ, UCHL5, CUL5, WDR35, EIF3E, TERF2IP, TOPBP1, THRB, IREB2, COL3A1, BICC1, STAT1, NFE2L2, POT1, PHIP, IFT74, ZBTB33, PTBP3, HAT1, BAZ2A, NOV, TENT2, PDCD10, LINC02210-CRHR1, TNFRSF11B, ZBTB1, OPHN1, FMN2, PIK3R1, CAPZA1, ZNF655, PHLDB2, GJA1, DVL3, LRRC17, KDM5A, ARL6IP5, PAIP1, …
GO:0023051	regulation of signaling	1745	13	6.7	1004	0.00948	0.39784	1	1	Any process that modulates the frequency, rate or extent of a signaling process	1.33059	-1.86953	HTRA1, ADAM8, CARD9, TMEM65, TNFRSF19, BST2, LRP8, PSMA6, PIDD1, IKBKG, RHOF, PREX1, FZD8, PPFIA3, CRTC1, ARAP1, STMN3, SUFU, RGS12, NPHP4, RHOBTB2, NOTCH1, HTT, IGFBP2, FGFR3, TGFB1, HMOX1, LAMA2, MAPK11, SZT2, CSF1, GDPD5, LZTS1, CTNNBIP1, PDE4A, SLC35F6, MC1R, AKR1C3, ABCA7, RGS3, ZNF703, DAPK3, CTSH, RAPGEF1, SOCS7, SPPL2B, GFI1, PALM3, SYT11, GPSM1, GLIS2, CLIP3, APOE, PLXNB1, ANAPC2, FBXL15…	ITGB1, ZNF675, ARRDC3, SH3BGRL, PSMD5, EEF1E1, BCHE, DYRK1A, RHOQ, WDR35, TERF2IP, TOPBP1, COL3A1, BICC1, STAT1, UBE2N, NFE2L2, PHIP, C3orf58, NOV, NETO2, PDCD10, LINC02210-CRHR1, OPHN1, PDGFD, PIK3R1, TIAM2, GPRC5B, GJA1, DVL3, TAF5, ARL6IP5, FBXO8, PFN2, SNX3, YWHAZ, EIF2A, ATP2C1, TMEM33, DNAJA1, PIBF1, SUMO1, ADNP, MAP3K20, DNM1L, RFFL, HSPH1, EIF2AK2, PSMD12, TRIM33, MED13, PDGFRA, DEPDC7, S…
GO:0012501	programmed cell death	1159	10	4.45	1067	0.00959	0.44829	1	1	A process which begins when a cell receives an internal or external signal and activates a series of biochemical events (signaling pathway). The process ends with the death of the cell	1.53921	-1.81184	CRYAB, OSGIN1, APLP1, ADAM8, CARD9, TNFRSF19, AL928654.3, PIDD1, IKBKG, PREX1, EGLN2, NOTCH1, HTT, ELMO3, FGFR3, TGFB1, MEF2D, HMOX1, TSPO, TNFRSF25, SLC35F6, KRT81, AKR1C3, BIN1, DAPK3, CTSH, HS1BP3, MTFP1, CLIP3, APOE, ATAD3A, GAS6, MADD, SCX, SCRIB, STK40, SIVA1, HYAL2, SPHK1, MAGED1, FLNA, RPL10, PTPA, THRA, CDK19, STK11, ZNF16, NME3, TICAM1, FAM129B, BCL7C, PACS2, GCLM, BRAT1, ARHGEF19, PLK3…	ITGB1, UBE2D3, BNIP3L, HIGD1A, EEF1E1, ITGB3BP, PPT1, DRAM2, CUL5, WDR35, CADM1, STAT1, NFE2L2, PHIP, PDCD10, TNFRSF11B, FMN2, PIK3R1, TIAM2, GJA1, ARL6IP5, RASSF3, YWHAZ, MRPS30, DNAJA1, MNAT1, ADNP, SLTM, MAP3K20, RARB, DNM1L, RFFL, HSPH1, EIF2AK2, NPM1, EBAG9, DDIAS, RTN4, GGCT, GPAM, MAP3K1, CREB1, FAIM, KRCC1, BUB1, CKAP2, TOPORS, CARD8, ZMYND11, TAF9, PDCD6IP, MTDH, NAE1, GULP1, RRM2B, STRA…
GO:0051640	organelle localization	346	5	1.33	1279	0.00969	0.66237	1	1	Any process in which an organelle is transported to, and/or maintained in, a specific location	0.986317	-1.51393	TPGS1, IKBKG, BORCS6, HTT, CROCC, HMOX1, KIF13B, AP3D1, CLUH, SYTL3, BIN1, SYT11, LAT2, SCRIB, SPIRE2, STK11, TRAPPC9, BRAT1, CNIH2, SNAP29, MAPT, KIF14, SUN2, HPS6, MAP1S, PLEKHM2, MAP4, TRAPPC6A, COL7A1, WASL, TMED9, ZNF593, SEC16A, SEC24C, DENND1A, GAB2, HHEX, AP3S2, SAR1B, SNAP23, ACTN4, CBL, CLN3, TMEM201, CHMP7, MUL1, KAT2A, GAK, DNAJC5, PIK3CD, PLD2, BLOC1S4	CENPQ, GEM, DCTN4, PDCD10, OPHN1, FMN2, NUSAP1, CHMP2B, PFN2, YWHAZ, PIBF1, DNM1L, SEC22B, TRAPPC6B, RAB6A, ITGA4, CDC23, TMEM230, DLGAP5, AREG, SDAD1, SEC31A, NIN, ABCE1, RAB11A, ASPM, BECN1, SCFD1, KIF18A, CALM2, AP3S1, LTV1, ARL8B, BBS7, CEP120, MCFD2, INTS13, SEH1L, SPDL1, VAMP7, SNX4, STX11, NUP88, VPS4B, SYT1, RAP1B, NMD3, TMED2, LRPPRC, CDC42, ZW10, RAB1A, LYN, NDC80, SYNJ2BP, TMED10, AP3B…
GO:0043406	positive regulation of MAP kinase activi...	118	3	0.45	37	0.01023	0.01023	1	1	Any process that activates or increases the frequency, rate or extent of MAP kinase activity	0.919047	-1.17316	ADAM8, IKBKG, FZD8, TGFB1, MAPK11, CSPG4, MADD, MAGED1, S1PR2, C1QTNF2, MAP2K3, DAB2IP, AXIN1, UBC, AKAP13, PTPN1, HRAS, MAPK8IP3, CSK, DBNL, PDE6G, MAP3K11, FZD5, TIAM1, MUL1, PDGFRB, AVPI1, MAP3K10, MAP3K6, MAPKAPK2	UBE2N, PDCD10, PDGFD, DVL3, MAP3K20, MAP4K5, SPAG9, IQGAP1, MAP3K7, MAP2K4, EPHA4, IL1B, WNT5A, TAOK3, TAB2, HACD3, FGF2, EGFR, CD24, IQGAP3, TLR4, TRAF6, MAP4K2, ERCC6, PRKAA1, PDGFC, LPAR1
GO:0009967	positive regulation of signal transducti...	816	8	3.13	250	0.01048	0.06327	1	1	Any process that activates or increases the frequency, rate or extent of signal transduction	1.17761	-1.64965	ADAM8, CARD9, TNFRSF19, BST2, PSMA6, PIDD1, IKBKG, FZD8, ARAP1, NOTCH1, HTT, FGFR3, TGFB1, HMOX1, MAPK11, CSF1, MC1R, AKR1C3, ABCA7, DAPK3, CTSH, RAPGEF1, GFI1, PLXNB1, FBXL15, GAS6, CSPG4, MADD, SEMA7A, NEO1, IGFBP5, HYAL2, SPHK1, MAGED1, SPPL3, FLNA, PSMB10, TRPM4, S100A4, STK11, TICAM1, RFNG, JPH2, S1PR2, LAMTOR4, C1QTNF2, MAP2K3, DAB2IP, JUP, AXIN1, SEMA4C, UBC, TELO2, SHF, TNFSF12, CARD10, A…	ARRDC3, SH3BGRL, PSMD5, EEF1E1, WDR35, TERF2IP, COL3A1, UBE2N, PHIP, NOV, PDCD10, PDGFD, PIK3R1, GPRC5B, GJA1, DVL3, ARL6IP5, YWHAZ, EIF2A, ATP2C1, TMEM33, PIBF1, MAP3K20, DNM1L, EIF2AK2, PSMD12, PDGFRA, RYK, PSMA4, RNF111, RTN4, RBPJ, CDKN2AIP, PSMC6, UBE3A, MAP3K1, CDKN2B, TRIM13, MTDH, PKD2, HPSE, MAP4K5, SPAG9, RC3H1, IQGAP1, NRK, STK3, GDF6, MAP4K3, FBXW7, PSMA1, LY96, GOLT1B, ANKRD17, CYP1B…
GO:0051641	cellular localization	1773	13	6.81	663	0.01085	0.19778	1	1	A localization process that takes place at the cellular level; as a result of a cellular localization process, a substance or cellular entity, such as a protein complex or organelle, is transported to, and/or maintained in, a specific location within or in the membrane of a cell	1.41535	-1.90257	CRYAB, TSNARE1, TPGS1, BST2, IKBKG, WDR33, PPFIA3, TOM1, IPO4, SUFU, BORCS6, HTT, TSPAN10, CROCC, TGFB1, HMOX1, TLN2, PPIL2, TAP1, KIF13B, TSPO, WRAP53, SZT2, AP3D1, CLUH, AKR1C3, ABCA7, SYTL3, BIN1, SIL1, SYT11, GLIS2, CLIP3, TAP2, APOE, LAT2, PEX6, TRPM2, RANGAP1, GAS6, RAB11FIP3, SCRIB, SREBF1, TOLLIP, DCTN5, HYAL2, SPHK1, SPPL3, EXOC3, FLNA, TRPM4, RPL10, SPIRE2, RAB11FIP5, THRA, STK11, PTCH1…	ITGB1, CENPQ, GEM, UBE2D3, BNIP3L, SLU7, NEDD1, MTBP, AGFG1, PPT1, RHOQ, WDR35, KPNA3, TERF2IP, PEX3, POT1, IFT74, DCTN4, NOV, RPGR, PDCD10, OPHN1, TMEM167A, FMN2, PIK3R1, SRP19, NUSAP1, DVL3, CPE, CHMP2B, HSP90AA1, PEX12, TRAM1, PFN2, SRP9, DYNC1LI1, SNX3, YWHAZ, GOLPH3L, TMEM33, DNAJA1, PIBF1, SUMO1, DNM1L, UGCG, TIMM17A, SEC22B, HSPH1, TOMM20, CCDC14, HSPB11, SNX2, NPM1, RPL39, AP1S2, TRAPPC6B…
GO:0043547	positive regulation of GTPase activity	357	5	1.37	38	0.01101	0.01101	1	1	Any process that activates or increases the activity of a GTPase	0.904623	-1.46585	PREX1, ARAP1, RGS12, FGFR3, SBF1, RGS3, DENND4A, RAPGEF1, PLXNB1, RANGAP1, MADD, SCRIB, PLEKHG4, ARHGEF10L, VPS9D1, PLEKHG3, AGAP6, RABEP2, TBC1D22A, RAP1GAP2, TRAPPC9, ARHGEF19, LAMTOR4, RALGDS, ARHGEF4, VAV2, DAB2IP, AXIN1, ARHGAP35, GMIP, TBC1D14, TBCD, SIPA1L3, ARFGAP1, RGS20, DEPDC5, AKAP13, DENND3, TBC1D13, TRAPPC6A, DOCK6, GNB5, HRAS, DENND4C, BCR, SRGAP2, RAPGEFL1, DENND1A, AGAP9, MYO9B, …	ITGB1, AGFG1, RPGR, OPHN1, TIAM2, DVL3, FBXO8, DNM1L, ASAP2, PDGFRA, TRAPPC6B, DEPDC7, SNX13, AC091057.1, RCBTB2, DENND6A, IQGAP1, RASA1, ELMOD2, SMAP1, DIS3, GNA13, ARF4, ARHGAP5, WNT5A, FAM13B, CHML, SRGAP2C, EIF5, GDI2, SOS2, CDC42EP3, CALM2, DOCK11, ITGA6, MET, HACD3, RGS2, ARHGAP11A, TBC1D12, DNMBP, JAK1, FGF2, DEPDC1, EGFR, BNIP2, PLEKHG7, TBCK, TBC1D8, GIT2, NET1, ECT2, ARFGAP3, RABGAP1L, …
GO:0022402	cell cycle process	1004	9	3.86	247	0.01138	0.06282	1	1	The cellular process that ensures successive accurate and complete genome replication and chromosome segregation	1.03207	-1.91003	CCNK, PSMA6, PIDD1, REC8, ARAP1, RTEL1, HTT, TGFB1, SSSCA1, LZTS1, BIN1, DAPK3, GFI1, PKMYT1, ANAPC2, FBXL15, RANGAP1, GAS6, RAB11FIP3, CDK9, FLNA, PSMB10, KLHL22, SPIRE2, PTPA, STK11, ZNF16, MAU2, SEPT6, MAPK12, SYCE1L, ALMS1, PLK3, KATNB1, LAMTOR4, KIF14, PNPT1, DAB2IP, RASSF1, SUN2, APBB1, MAP4, UBC, CUL7, FSD1, WASHC1, RECQL5, MCM2, CTDP1, HINFP, WASL, HRAS, HSF1, ZBTB49, WDR62, MUC1, TFAP4, …	ITGB1, CENPQ, CCNG1, GEM, NEDD1, PSMD5, ITGB3BP, CETN2, LRRCC1, RNASEH2B, MTBP, CUL5, TOPBP1, POLE2, PHIP, YEATS4, CETN3, FMN2, ZNF655, NUSAP1, CHMP2B, HSP90AA1, GSPT1, DYNC1LI1, PIBF1, MNAT1, MAP3K20, PRIM1, PSMD12, NPM1, ARPP19, PPP1CC, DDIAS, PSMA4, DYNLT3, SMC4, CDC7, PSMC6, CEP55, CENPK, NUP35, CDC27, BUB1, CKAP2, CNOT8, CDKN2B, CDC23, DBF4, HAUS3, ANAPC13, PDCD6IP, PKD2, MND1, KAT2B, PRKAR1…
GO:0002281	macrophage activation involved in immune...	3	1	0.01	39	0.01148	0.01148	1	1	A change in morphology and behavior of a macrophage resulting from exposure to a cytokine, chemokine, cellular ligand, or soluble factor, leading to the initiation or perpetuation of an immune response	0.62738	0.62738	SBNO2, TICAM1
GO:0002679	respiratory burst involved in defense re...	3	1	0.01	1462	0.01148	1	1	1	A phase of elevated metabolic activity, during which oxygen consumption increases made as part of a defense response ; this leads to the production, by an NADH dependent system, of hydrogen peroxide (H2O2), superoxide anions and hydroxyl radicals	0.314555	0.314555	RPS19, PIK3CD
GO:0002887	negative regulation of myeloid leukocyte...	3	1	0.01	1463	0.01148	1	1	1	Any process that stops, prevents, or reduces the frequency, rate, or extent of myeloid leukocyte mediated immunity	0.600682	0.600682	HMOX1, BCR
GO:0005997	xylulose metabolic process	3	1	0.01	1464	0.01148	1	1	1	The chemical reactions and pathways involving xylulose, the ketopentose threo-2-pentulose	0.347789	0.347789	TKT
GO:0021747	cochlear nucleus development	3	1	0.01	40	0.01148	0.01148	1	1	The process whose specific outcome is the progression of the cochlear nucleus over time, from its formation to the mature structure	0.21839	0.21839	SCRIB
GO:0031915	positive regulation of synaptic plastici...	3	1	0.01	41	0.01148	0.01148	1	1	A process that increases synaptic plasticity, the ability of synapses to change as circumstances require. They may alter function, such as increasing or decreasing their sensitivity, or they may increase or decrease in actual numbers	0.356661	0.356661	ANAPC2
GO:0032762	mast cell cytokine production	3	1	0.01	1465	0.01148	1	1	1	Any process that contributes to cytokine production by a mast cell	0.05436	0.05436	HMOX1	BCL6
GO:0032763	regulation of mast cell cytokine product...	3	1	0.01	1466	0.01148	1	1	1	Any process that modulates the frequency, rate, or extent of mast cell cytokine production	0.05436	0.05436	HMOX1	BCL6
GO:0033004	negative regulation of mast cell activat...	3	1	0.01	1467	0.01148	1	1	1	Any process that stops, prevents, or reduces the frequency, rate, or extent of mast cell activation	0.169274	0.169274	HMOX1
GO:0043301	negative regulation of leukocyte degranu...	3	1	0.01	1468	0.01148	1	1	1	Any process that stops, prevents, or reduces the rate of leukocyte degranulation	0.600682	0.600682	HMOX1, BCR
GO:0048742	regulation of skeletal muscle fiber deve...	3	1	0.01	42	0.01148	0.01148	1	1	Any process that modulates the frequency, rate or extent of skeletal muscle fiber development. Muscle fibers are formed by the maturation of myotubes. They can be classed as slow, intermediate/fast or fast	0.207206	0.207206	FAM129B
GO:0048743	positive regulation of skeletal muscle f...	3	1	0.01	43	0.01148	0.01148	1	1	Any process that activates, maintains or increases the rate of skeletal muscle fiber development. Muscle fibers are formed by the maturation of myotubes. They can be classed as slow, intermediate/fast or fast	0.207206	0.207206	FAM129B
GO:0060268	negative regulation of respiratory burst	3	1	0.01	1469	0.01148	1	1	1	Any process that decreases the rate frequency or extent of a phase of elevated metabolic activity, during which oxygen consumption increases; this leads to the production, by an NADH dependent system, of hydrogen peroxide (H2O2), superoxide anions and hydroxyl radicals	0.375766	0.375766	RPS19, BCR
GO:0090527	actin filament reorganization	3	1	0.01	1470	0.01148	1	1	1	A process that is carried out at the cellular level which results in dynamic structural changes to the arrangement of actin filaments	0.348214	0.348214	ARAP1
GO:1904116	response to vasopressin	3	1	0.01	44	0.01148	0.01148	1	1		0.507725	0.507725	RANGAP1, CDC6
GO:1904117	cellular response to vasopressin	3	1	0.01	45	0.01148	0.01148	1	1		0.507725	0.507725	RANGAP1, CDC6
GO:0061180	mammary gland epithelium development	43	2	0.17	46	0.01172	0.01172	1	1	The process whose specific outcome is the progression of the mammary gland epithelium over time, from its formation to the mature structure. The mammary gland is a large compound sebaceous gland that in female mammals is modified to secrete milk	0.662203	-0.523866	TGFB1, CSF1, ZNF703, SCRIB, PTCH1, CEBPB, DEAF1, ETV4	RTN4, AREG, WNT5A, IQGAP3, GATA3
GO:0048583	regulation of response to stimulus	2014	14	7.73	985	0.01244	0.37928	1	1	Any process that modulates the frequency, rate or extent of a response to a stimulus. Response to stimulus is a change in state or activity of a cell or an organism (in terms of movement, secretion, enzyme production, gene expression, etc.) as a result of a stimulus	1.73252	-1.96051	CRYAB, SPNS2, HTRA1, SPP1, LAG3, ADAM8, CARD9, TNFRSF19, BST2, PSMA6, PIDD1, IKBKG, RHOF, PREX1, FZD8, ARAP1, STMN3, RTEL1, SUFU, RGS12, NPHP4, EXOSC6, RHOBTB2, NOTCH1, HTT, IGFBP2, FGFR3, TGFB1, HMOX1, MAPK11, CERS2, SZT2, SBNO2, CSF1, GDPD5, PGF, CTNNBIP1, PDE4A, SLC35F6, MC1R, AKR1C3, ABCA7, RGS3, ZNF703, DAPK3, CTSH, PYCR1, RAPGEF1, SOCS7, SPPL2B, GFI1, PALM3, SYT11, GPSM1, GLIS2, CLIP3, APOE…	ITGB1, ZNF675, ARRDC3, UBE2D3, SH3BGRL, WIPF1, ARPC5, PSMD5, EEF1E1, RNASEH2B, DYRK1A, PTGES3, RHOQ, WDR35, UTRN, TERF2IP, TOPBP1, COL3A1, BICC1, ERAP1, CADM1, STAT1, UBE2N, NFE2L2, PHIP, C3orf58, NOV, NETO2, PDCD10, ZBTB1, TBC1D23, OPHN1, PDGFD, PIK3R1, TIAM2, GPRC5B, UBE2D2, PHLDB2, GJA1, DVL3, TAF5, HSP90AA1, ARL6IP5, FBXO8, SNX3, YWHAZ, EIF2A, ATP2C1, TMEM33, DNAJA1, PIBF1, SUMO1, MAP3K20, DN…
GO:0051179	localization	3407	20	13.08	496	0.01274	0.13378	1	1	Any process in which a cell, a substance, or a cellular entity, such as a protein complex or organelle, is transported to or maintained in a specific location	1.73589	-2.0633	CRYAB, SPNS2, SPP1, TSNARE1, TMEM38A, APLP1, ADAM8, TPGS1, BST2, AKAP10, TIE1, LRP8, PSMA6, IKBKG, RHOF, PREX1, WDR33, PPFIA3, TOM1, SLC9B1, IPO4, ARAP1, ITGB4, OSBPL5, PANX2, NEURL1B, SUFU, NPHP4, SLC27A4, NOTCH1, BORCS6, HTT, TSPAN10, ELMO3, SLC19A1, CROCC, SLC9A5, A1BG, TGFB1, HMOX1, LAMA2, MAPK11, TLN2, ABCB9, CERS2, SLC26A1, EFNB1, RAB4B-EGLN2, TRPV2, PPIL2, TAP1, KIF13B, TSPO, SCN1B, WRAP53…	ITGB1, YPEL5, CENPQ, GEM, CD58, UBE2D3, BNIP3L, TMEM184C, WIPF1, ARPC5, ATP5F1EP2, SLU7, NEDD1, PSMD5, DNAJC28, MTBP, AGFG1, PPT1, RHOQ, SLC39A6, CUL5, WDR35, KPNA3, CLVS1, UTRN, TERF2IP, EXOC5, IREB2, COL3A1, PEX3, CADM1, NFE2L2, XPR1, POT1, IFT74, SLC25A46, DCTN4, NOV, NETO2, RPGR, PDCD10, LINC02210-CRHR1, SNX14, OPHN1, TMEM167A, FMN2, PDGFD, PIK3R1, SRP19, NUSAP1, ARMC1, PHLDB2, GJA1, DVL3, CP…
GO:0005977	glycogen metabolic process	45	2	0.17	48	0.01278	0.01278	1	1	The chemical reactions and pathways involving glycogen, a polydisperse, highly branched glucan composed of chains of D-glucose residues in alpha-(1->4) glycosidic linkage, joined together by alpha-(1->6) glycosidic linkages	0.554353	-0.766654	STK40, C1QTNF2, PYGB, GAA, UBC, STBD1, PHKA2	UGP2, PPP1CC, AGL, CALM2, PPP1CB, GYG1, PPP1R2, PGM2
GO:0006073	cellular glucan metabolic process	45	2	0.17	49	0.01278	0.01278	1	1	The chemical reactions and pathways involving glucans, polysaccharides consisting only of glucose residues	0.554353	-0.766654	STK40, C1QTNF2, PYGB, GAA, UBC, STBD1, PHKA2	UGP2, PPP1CC, AGL, CALM2, PPP1CB, GYG1, PPP1R2, PGM2
GO:0044042	glucan metabolic process	45	2	0.17	50	0.01278	0.01278	1	1	The chemical reactions and pathways involving glucans, polysaccharides consisting only of glucose residues	0.554353	-0.766654	STK40, C1QTNF2, PYGB, GAA, UBC, STBD1, PHKA2	UGP2, PPP1CC, AGL, CALM2, PPP1CB, GYG1, PPP1R2, PGM2
GO:0042981	regulation of apoptotic process	847	8	3.25	1367	0.01298	0.77571	1	1	Any process that modulates the occurrence or rate of cell death by apoptotic process	1.42549	-1.74756	CRYAB, OSGIN1, ADAM8, CARD9, PIDD1, PREX1, EGLN2, NOTCH1, HTT, TGFB1, HMOX1, TSPO, TNFRSF25, SLC35F6, AKR1C3, BIN1, DAPK3, CTSH, HS1BP3, CLIP3, APOE, ATAD3A, GAS6, MADD, SCX, SCRIB, STK40, HYAL2, SPHK1, MAGED1, FLNA, RPL10, PTPA, THRA, CDK19, ZNF16, FAM129B, GCLM, ARHGEF19, PLK3, MAPT, KIF14, ARHGEF4, VAV2, PPM1F, DAB2IP, TYRO3, BCAR1, APBB1, UBC, ALX3, TNFSF12, CARD10, P4HB, AKAP13, XIAP, PTPN1,…	ITGB1, BNIP3L, HIGD1A, EEF1E1, ITGB3BP, PPT1, WDR35, STAT1, NFE2L2, PHIP, PDCD10, TNFRSF11B, FMN2, PIK3R1, TIAM2, ARL6IP5, RASSF3, YWHAZ, DNAJA1, MNAT1, ADNP, MAP3K20, RARB, DNM1L, RFFL, HSPH1, EIF2AK2, NPM1, RTN4, GPAM, CREB1, FAIM, TOPORS, CARD8, ZMYND11, TAF9, MTDH, NAE1, RRM2B, STRADB, PRNP, STK3, RASA1, GDF6, FBXW7, DKK1, CYP1B1, KLHL20, TCP1, GNA13, OMA1, PRKRA, TPT1, MAP2K4, ARL6IP1, IL1B,…
GO:0030490	maturation of SSU-rRNA	46	2	0.18	541	0.01333	0.1519	1	1	Any process involved in the maturation of a precursor Small SubUnit (SSU) ribosomal RNA (rRNA) molecule into a mature SSU-rRNA molecule	0.49366	-0.778006	TBL3, RPSA, RPS19, RPS28, RPS21	UTP3, MPHOSPH10, NOL11, UTP23, MRPS9, UTP4, UTP14C, RIOK1, HEATR1, DCAF13, UTP18, RPS24, UTP6
GO:0042255	ribosome assembly	46	2	0.18	1471	0.01333	1	1	1	The aggregation, arrangement and bonding together of the mature ribosome and of its subunits	0.585094	-0.886534	RPL10, RPSA, DDX28, RPS19, DHX30, RPS28, NOP53, RPS10, NSUN4	RPF1, EIF2A, NPM1, BRIX1, MTERF3, SBDS, MTERF4, FASTKD2, RPF2
GO:0008219	cell death	1224	10	4.7	1118	0.01391	0.50392	1	1	Any biological process that results in permanent cessation of all vital functions of a cell. A cell should be considered dead when any one of the following molecular or morphological criteria is met: (1) the cell has lost the integrity of its plasma membrane; (2) the cell, including its nucleus, has undergone complete fragmentation into discrete bodies (frequently referred to as \apoptotic bodies…	1.53921	-1.81184	CRYAB, OSGIN1, APLP1, ADAM8, CARD9, TNFRSF19, AL928654.3, PIDD1, IKBKG, PREX1, EGLN2, NOTCH1, HTT, ELMO3, FGFR3, TGFB1, MEF2D, HMOX1, TSPO, TNFRSF25, SLC35F6, KRT81, AKR1C3, BIN1, DAPK3, CTSH, PYCR1, HS1BP3, MTFP1, CLIP3, APOE, ATAD3A, GAS6, MADD, SCX, SCRIB, STK40, SIVA1, HYAL2, SPHK1, MAGED1, FLNA, RPL10, PTPA, THRA, CDK19, STK11, ZNF16, NME3, TICAM1, FAM129B, BCL7C, PACS2, GCLM, BRAT1, ARHGEF1…	ITGB1, UBE2D3, BNIP3L, HIGD1A, EEF1E1, ITGB3BP, PPT1, DRAM2, CUL5, WDR35, CADM1, STAT1, NFE2L2, PHIP, PDCD10, TNFRSF11B, FMN2, PIK3R1, TIAM2, GJA1, ARL6IP5, RASSF3, YWHAZ, MRPS30, DNAJA1, MNAT1, ADNP, SLTM, MAP3K20, RARB, DNM1L, RFFL, HSPH1, EIF2AK2, NPM1, EBAG9, DDIAS, RTN4, GGCT, GPAM, MAP3K1, CREB1, FAIM, KRCC1, BUB1, CKAP2, TOPORS, CARD8, ZMYND11, TAF9, TRIM13, PDCD6IP, MTDH, NAE1, GULP1, RRM…
GO:0043067	regulation of programmed cell death	858	8	3.3	1373	0.01397	0.7839	1	1	Any process that modulates the frequency, rate or extent of programmed cell death, cell death resulting from activation of endogenous cellular processes	1.42549	-1.74756	CRYAB, OSGIN1, ADAM8, CARD9, PIDD1, PREX1, EGLN2, NOTCH1, HTT, TGFB1, HMOX1, TSPO, TNFRSF25, SLC35F6, AKR1C3, BIN1, DAPK3, CTSH, HS1BP3, CLIP3, APOE, ATAD3A, GAS6, MADD, SCX, SCRIB, STK40, HYAL2, SPHK1, MAGED1, FLNA, RPL10, PTPA, THRA, CDK19, ZNF16, FAM129B, GCLM, ARHGEF19, PLK3, MAPT, KIF14, ARHGEF4, VAV2, PPM1F, DAB2IP, TYRO3, BCAR1, APBB1, UBC, ALX3, TNFSF12, CARD10, P4HB, AKAP13, XIAP, PTPN1,…	ITGB1, BNIP3L, HIGD1A, EEF1E1, ITGB3BP, PPT1, WDR35, STAT1, NFE2L2, PHIP, PDCD10, TNFRSF11B, FMN2, PIK3R1, TIAM2, ARL6IP5, RASSF3, YWHAZ, DNAJA1, MNAT1, ADNP, MAP3K20, RARB, DNM1L, RFFL, HSPH1, EIF2AK2, NPM1, RTN4, GPAM, CREB1, FAIM, TOPORS, CARD8, ZMYND11, TAF9, MTDH, NAE1, RRM2B, STRADB, PRNP, STK3, RASA1, GDF6, FBXW7, DKK1, CYP1B1, KLHL20, TCP1, GNA13, OMA1, PRKRA, TPT1, MAP2K4, ARL6IP1, IL1B,…
GO:0006112	energy reserve metabolic process	49	2	0.19	51	0.01504	0.01504	1	1	The chemical reactions and pathways by which a cell derives energy from stored compounds such as fats or glycogen	0.554353	-0.775054	STK40, C1QTNF2, PYGB, GAA, UBC, STBD1, PHKA2	UGP2, PPP1CC, AGL, CALM2, PPP1CB, GYG1, PPP1R2, PGM2, GFPT1
GO:0048518	positive regulation of biological proces...	2968	18	11.4	1070	0.01507	0.45228	1	1	Any process that activates or increases the frequency, rate or extent of a biological process. Biological processes are regulated by many means; examples include the control of gene expression, protein modification or interaction with a protein or substrate molecule	1.4712	-2.00348	HTRA1, OSGIN1, SPP1, LAG3, ADAM8, CARD9, TNFRSF19, BST2, LRP8, CCNK, PSMA6, PIDD1, PRKAR1B, IKBKG, PREX1, BRF1, EGLN2, FZD8, CRTC1, ARAP1, RTEL1, NPHP4, KLF6, EXOSC6, NOTCH1, HTT, TEF, IGFBP2, NPHP1, CROCC, FGFR3, TGFB1, MEF2D, HMOX1, NRF1, LAMA2, MAPK11, EFNB1, TRPV2, TSPO, SCN1B, WRAP53, AP3D1, CSF1, GDPD5, ISG15, PGF, CTNNBIP1, CDK20, CNPY2, SLC35F6, MC1R, AKR1C3, ABCA7, ZNF703, BIN1, DAPK3, Z…	ITGB1, CENPQ, CD58, ARRDC3, UBE2D3, SH3BGRL, BNIP3L, WIPF1, ARPC5, PSMD5, DCUN1D4, EEF1E1, ITGB3BP, RNASEH2B, MTBP, PPT1, DYRK1A, PTGES3, RHOQ, WDR35, EIF3E, UTRN, TERF2IP, THRB, COL3A1, ERAP1, CADM1, STAT1, UBE2N, NFE2L2, ANKRD49, POT1, PHIP, YEATS4, IFT74, MED21, NOV, PDCD10, LINC02210-CRHR1, ZBTB1, TBC1D23, PDGFD, PIK3R1, TIAM2, GPRC5B, UBE2D2, NUSAP1, PHLDB2, GJA1, DVL3, MKL2, CHMP2B, HSP90AA…
GO:0010647	positive regulation of cell communicatio...	871	8	3.35	324	0.01521	0.08201	1	1	Any process that increases the frequency, rate or extent of cell communication. Cell communication is the process that mediates interactions between a cell and its surroundings. Encompasses interactions such as signaling or attachment between one cell and another cell, between a cell and an extracellular matrix, or between a cell and any other aspect of its environment	1.18536	-1.64965	ADAM8, CARD9, TNFRSF19, BST2, PSMA6, PIDD1, IKBKG, FZD8, CRTC1, ARAP1, NOTCH1, HTT, FGFR3, TGFB1, HMOX1, LAMA2, MAPK11, CSF1, MC1R, AKR1C3, ABCA7, DAPK3, CTSH, RAPGEF1, GFI1, APOE, PLXNB1, FBXL15, GAS6, CSPG4, MADD, SEMA7A, NEO1, IGFBP5, HYAL2, SPHK1, MAGED1, SPPL3, FLNA, PSMB10, TRPM4, S100A4, STK11, TICAM1, RFNG, JPH2, S1PR2, LAMTOR4, C1QTNF2, MAP2K3, DAB2IP, JUP, AXIN1, SEMA4C, UBC, TELO2, SHF…	ARRDC3, SH3BGRL, PSMD5, EEF1E1, WDR35, TERF2IP, COL3A1, UBE2N, PHIP, NOV, PDCD10, PDGFD, PIK3R1, GPRC5B, GJA1, DVL3, ARL6IP5, YWHAZ, EIF2A, ATP2C1, TMEM33, PIBF1, MAP3K20, DNM1L, EIF2AK2, PSMD12, PDGFRA, RYK, PSMA4, RNF111, RTN4, RBPJ, CDKN2AIP, PSMC6, UBE3A, MAP3K1, CREB1, CDKN2B, TRIM13, MTDH, PKD2, HPSE, MAP4K5, SPAG9, RC3H1, PRNP, IQGAP1, NRK, STK3, GDF6, MAP4K3, FBXW7, PSMA1, LY96, GOLT1B, A…
GO:0006787	porphyrin-containing compound catabolic ...	4	1	0.02	1472	0.01528	1	1	1	The chemical reactions and pathways resulting in the breakdown of any member of a large group of derivatives or analogs of porphyrin. Porphyrin consists of a ring of four pyrrole nuclei linked each to the next at their alpha positions through a methine group	0.301984	0.301984	HMOX1
GO:0019322	pentose biosynthetic process	4	1	0.02	1473	0.01528	1	1	1	The chemical reactions and pathways resulting in the formation of a pentose, any monosaccharide with a chain of five carbon atoms in the molecule	0.199117	0.199117	TKT
GO:0021548	pons development	4	1	0.02	52	0.01528	0.01528	1	1	The process whose specific outcome is the progression of the pons over time, from its formation to the mature structure. The pons lies above the medulla and next to the cerebellum. The pons conveys information about movement from the cerebral hemisphere to the cerebellum	0.238841	0.238841	SCRIB
GO:0032202	telomere assembly	4	1	0.02	1474	0.01528	1	1	1	A cellular process that results in the aggregation, arrangement and bonding together of a set of components to form a telomere at a non-telomeric double-stranded DNA end. A telomere is a terminal region of a linear chromosome that includes telomeric DNA repeats and associated proteins	-0.129267	-0.129267	WRAP53	POT1
GO:0033015	tetrapyrrole catabolic process	4	1	0.02	1475	0.01528	1	1	1	The chemical reactions and pathways leading to the breakdown of tetrapyrroles, natural pigments containing four pyrrole rings joined by one-carbon units linking position 2 of one pyrrole ring to position 5 of the next	0.301984	0.301984	HMOX1
GO:0042167	heme catabolic process	4	1	0.02	53	0.01528	0.01528	1	1	The chemical reactions and pathways resulting in the breakdown of heme, any compound of iron complexed in a porphyrin (tetrapyrrole) ring	0.301984	0.301984	HMOX1
GO:0043615	astrocyte cell migration	4	1	0.02	54	0.01528	0.01528	1	1	The orderly movement of an astrocyte, a class of large neuroglial (macroglial) cells in the central nervous system, the largest and most numerous neuroglial cells in the brain and spinal cord	0.0756887	0.0756887	SCRIB	HEXB
GO:0045217	cell-cell junction maintenance	4	1	0.02	1476	0.01528	1	1	1	The maintenance of junctions between cells	0.205246	0.205246	KIFC3, PARD6A	PLEKHA7
GO:0046149	pigment catabolic process	4	1	0.02	55	0.01528	0.01528	1	1	The chemical reactions and pathways resulting in the breakdown of a pigment, any general or particular coloring matter in living organisms, e.g. melanin	0.301984	0.301984	HMOX1
GO:0060088	auditory receptor cell stereocilium orga...	4	1	0.02	56	0.01528	0.01528	1	1	A process that is carried out at the cellular level which results in the assembly, arrangement of constituent parts, or disassembly of a stereocilium. A stereocilium is an actin-based protrusion from the apical surface of auditory hair cells	0.0698535	0.0698535	SCRIB
GO:0071281	cellular response to iron ion	4	1	0.02	1477	0.01528	1	1	1	Any process that results in a change in state or activity of a cell (in terms of movement, secretion, enzyme production, gene expression, etc.) as a result of an iron ion stimulus	-0.207861	-0.207861	HMOX1	B2M, TFAP2A, CCNB1
GO:0090129	positive regulation of synapse maturatio...	4	1	0.02	57	0.01528	0.01528	1	1	Any process that increases the extent of synapse maturation, the process that organizes a synapse so that it attains its fully functional state	0.307461	0.307461	ANAPC2, DAB2IP	NRXN3
GO:0090666	scaRNA localization to Cajal body	4	1	0.02	58	0.01528	0.01528	1	1		-0.0954146	-0.0954146	WRAP53	TCP1
GO:0098887	neurotransmitter receptor transport, end...	4	1	0.02	59	0.01528	0.01528	1	1		0.0784339	0.0784339	SCRIB	RAB11A
GO:0044723	single-organism carbohydrate metabolic p...	253	4	0.97	263	0.01541	0.06588	1	1	The chemical reactions and pathways involving carbohydrates, occurring within a single organism	0.877594	-1.03666	B3GNT3, IPPK, H6PD, TGFB1, PC, STK40, WDR5, IGFBP5, MAN2C1, TKFC, INPP5E, CPT1A, BRAT1, PFKL, C1QTNF2, PYGB, ACACB, TKT, SLC25A10, SIRT6, GAA, UBC, GLYCTK, GALK1, PMM1, IDUA, DGKQ, PFKFB4, ST6GALNAC6, PPARD, OGDH, POFUT1, NEU3, STBD1, PCK2, ST3GAL5, PTH1R, NISCH, PHKA2, GAL3ST4, ISYNA1, IGFBP4, CRTC2, SESN2, BAD, FUT10, KAT2A, HRH1, CHST12, MANBA, WDTC1, ALDOA, SLC25A1, INPPL1	GPD2, UGP2, ARPP19, PPP1CC, KAT2B, AGL, HAS2, OMA1, CALM2, SIRT1, PPP1CB, FUCA2, ST6GALNAC5, GYG1, ADIPOR1, SDHAF3, COX11, SLC25A13, ABHD10, ALDH5A1, PPP1R2, CTBS, GNPDA2, IMPAD1, BPGM, PDHB, FUT8, SERP1, RPE, B3GLCT, GK, PGM2, COQ2, DUSP12, MAN2A1, IMPA1, PRKAA1, IL6, GCLC, HEXB
GO:0090287	regulation of cellular response to growt...	138	3	0.53	60	0.01559	0.01559	1	1	Any process that modulates the rate, frequency, or extent of a change in state or activity of a cell (in terms of movement, secretion, enzyme production, gene expression, etc.) as a result of a growth factor stimulus	0.928743	-0.987182	HTRA1, NOTCH1, TGFB1, ZNF703, FBXL15, NEO1, STK11, FAM129B, GPC1, DAB2IP, UBC, XIAP, PTPN1, UBE2O, HHEX, FUZ, VASN, NBL1, PPP2R5B, PRKD2, CASK, SMAD6, LTBP1, ENG, HSP90AB1, ITGB3, CD109	TRIM33, RNF111, RBPJ, CDKN2B, DKK1, SHISA2, IL1B, WNT5A, SLC9A6, SMURF2, STRAP, SIRT1, ING2, CYFIP2, CTDSPL2, FGF2, ACVR2A, CITED2, SDCBP, TOB1, SPRY2, SNW1, CCBE1, AC068234.1, TGFBR1, SNX25, GATA3
GO:0022603	regulation of anatomical structure morph...	542	6	2.08	61	0.01588	0.01588	1	1	Any process that modulates the frequency, rate or extent of anatomical structure morphogenesis	1.12468	-1.49833	SPP1, TIE1, LRP8, PSMA6, PREX1, ARAP1, NOTCH1, TGFB1, HMOX1, TRPV2, KIF13B, CSF1, LZTS1, PGF, DAPK3, CTSH, TBX2, WASF3, APOE, PLXNB1, ANAPC2, RNH1, SCX, SEMA7A, SPHK1, MAGED1, FLNA, PSMB10, STK11, PARD6A, FAM129B, ARHGEF19, MAPT, HDAC5, DAB2IP, C21orf2, ARHGAP35, SIRT6, PLEKHO1, UBC, CUL7, BTBD7, INF2, CSNK1G2, PLXNB2, TNFSF12, PTPRS, AKAP13, PLXNA1, DVL1, CTTN, BCR, NFATC4, CELSR3, MIEF2, HHEX, …	PSMD5, RHOQ, ERAP1, STAT1, NFE2L2, ZMYM6, PHIP, PDCD10, TNFRSF11B, PHLDB2, DVL3, ADNP, DNM1L, COL5A2, PSMD12, RYK, PSMA4, RTN4, RBPJ, CDC7, PSMC6, MTDH, RC3H1, RASA1, GNG5, ZMYM4, FBXW7, PSMA1, DKK1, CYP1B1, GNA13, HAS2, EFNB2, OMA1, BASP1, RAB11A, EPHA4, IL1B, DPYSL2, WNT5A, SMURF2, YWHAH, CDC42EP3, SIRT1, MFF, ZNRF3, PSMD10, DDAH1, KRIT1, SEPT7, VAMP7, MYO10, TGFB2, VPS35, SYT1, GBP1, PDLIM5, R…
GO:0002698	negative regulation of immune effector p...	51	2	0.2	1478	0.01623	1	1	1	Any process that stops, prevents, or reduces the frequency, rate, or extent of an immune effector process	0.904342	-0.689824	HTRA1, BST2, TGFB1, HMOX1, HLX, TKFC, RPS19, BCR, TARBP2, MUL1	EIF2AK2, SOCS5, RC3H1, TGFB2, TSPAN6, BCL6, CD46, THOC1, CD59, MICB, C4BPB
GO:0090630	activation of GTPase activity	51	2	0.2	62	0.01623	0.01623	1	1		0.608781	-0.623071	SCRIB, PLEKHG4, TBC1D22A, TBC1D14, TBC1D13, TBC1D22B, RALGAPA2, EVI5L, SYDE1, TBC1D2, TIAM1, SGSM2, TAX1BP3, EPHA1, TBC1D25, RCC2	WNT5A, EIF5, TBC1D12, TBCK, TBC1D8, ECT2, RABGAP1L, RASGRF1, PIP5K1A
GO:0009893	positive regulation of metabolic process	1863	13	7.15	384	0.01635	0.09536	1	1	Any process that activates or increases the frequency, rate or extent of the chemical reactions and pathways within a cell or an organism	1.26833	-1.6898	SPP1, ADAM8, CARD9, TNFRSF19, LRP8, CCNK, PSMA6, PIDD1, PRKAR1B, IKBKG, BRF1, EGLN2, FZD8, CRTC1, ARAP1, RTEL1, KLF6, EXOSC6, NOTCH1, HTT, TEF, FGFR3, TGFB1, MEF2D, HMOX1, NRF1, MAPK11, TSPO, WRAP53, CSF1, CDK20, CNPY2, MC1R, AKR1C3, ABCA7, ZGLP1, CTSH, RAPGEF1, GLIS2, CLIP3, HELZ2, APOE, ANAPC2, GAS6, CSPG4, MADD, SCX, SEMA7A, CDK9, SCRIB, SREBF1, WDR5, TOLLIP, ZBTB7B, HYAL2, SPHK1, MAGED1, SPPL…	ARRDC3, BNIP3L, PSMD5, DCUN1D4, DYRK1A, PTGES3, RHOQ, WDR35, EIF3E, TERF2IP, THRB, STAT1, UBE2N, NFE2L2, ANKRD49, POT1, PHIP, YEATS4, IFT74, MED21, PDCD10, LINC02210-CRHR1, PDGFD, PIK3R1, GPRC5B, GJA1, DVL3, MKL2, HSP90AA1, KDM5A, ARL6IP5, PAIP1, TAF1D, GTF2F2, PFN2, MED4, EIF2A, PIBF1, MNAT1, SUMO1, ADNP, CBFB, MAP3K20, EED, RARB, SEC22B, HSPH1, DDX21, EIF2AK2, BPTF, PSMD12, NPM1, DCUN1D5, CHURC…
GO:0043087	regulation of GTPase activity	397	5	1.52	63	0.01683	0.01683	1	1	Any process that modulates the rate of GTP hydrolysis by a GTPase	0.926846	-1.46585	PREX1, ARAP1, STMN3, RGS12, FGFR3, SBF1, RGS3, DENND4A, RAPGEF1, PLXNB1, RANGAP1, MADD, SCRIB, PLEKHG4, ARHGEF10L, VPS9D1, PLEKHG3, AGAP6, RABEP2, TBC1D22A, RAP1GAP2, TRAPPC9, ARHGEF19, LAMTOR4, RALGDS, ARHGEF4, VAV2, DAB2IP, AXIN1, ARHGAP35, GMIP, TBC1D14, TBCD, SIPA1L3, ARFGAP1, RGS20, DEPDC5, TNK2, PLXNB2, AKAP13, DENND3, TBC1D13, TRAPPC6A, DOCK6, GNB5, HRAS, DENND4C, BCR, SRGAP2, RAPGEFL1, DE…	ITGB1, AGFG1, RPGR, OPHN1, TIAM2, DVL3, FBXO8, DNM1L, ASAP2, PDGFRA, TRAPPC6B, DEPDC7, SNX13, AC091057.1, RCBTB2, DENND6A, IQGAP1, RASA1, ELMOD2, SMAP1, DIS3, GNA13, EPHA4, ARF4, ARHGAP5, WNT5A, FAM13B, CHML, SRGAP2C, EIF5, GDI2, SOS2, CDC42EP3, CALM2, DOCK11, ITGA6, MET, HACD3, RGS2, ARHGAP11A, TBC1D12, EIF2S1, DNMBP, SH3BP4, TMED2, JAK1, FGF2, DEPDC1, EGFR, BNIP2, PLEKHG7, TBCK, TBC1D8, GIT2, N…
GO:0044264	cellular polysaccharide metabolic proces...	52	2	0.2	64	0.01684	0.01684	1	1	The chemical reactions and pathways involving polysaccharides, polymers of more than 10 monosaccharide residues joined by glycosidic linkages, as carried out by individual cells	0.630508	-0.821791	B3GNT3, STK40, C1QTNF2, PYGB, GAA, UBC, STBD1, PHKA2	UGP2, PPP1CC, AGL, HAS2, CALM2, PPP1CB, GYG1, PPP1R2, PGM2
GO:0042058	regulation of epidermal growth factor re...	53	2	0.2	1479	0.01746	1	1	1	Any process that modulates the frequency, rate or extent of epidermal growth factor receptor signaling pathway activity	0.583586	-0.710321	ARAP1, DAB2IP, UBC, CBL, PDE6G, SOCS4, MVB12A, PTPN3, RHBDF2, EPN1	SOCS5, FBXW7, PTPN12, RAB7A, AFAP1L2, EGFR, CDC42, SPRY2, SH3KBP1, ERRFI1
GO:0048584	positive regulation of response to stimu...	1081	9	4.15	565	0.01798	0.16067	1	1	Any process that activates, maintains or increases the rate of a response to a stimulus. Response to stimulus is a change in state or activity of a cell or an organism (in terms of movement, secretion, enzyme production, gene expression, etc.) as a result of a stimulus	1.21668	-1.77668	LAG3, ADAM8, CARD9, TNFRSF19, BST2, PSMA6, PIDD1, IKBKG, FZD8, ARAP1, EXOSC6, NOTCH1, HTT, FGFR3, TGFB1, HMOX1, MAPK11, CSF1, PGF, MC1R, AKR1C3, ABCA7, DAPK3, CTSH, RAPGEF1, GFI1, PLXNB1, LAT2, FBXL15, GAS6, CSPG4, MADD, SEMA7A, NEO1, IGFBP5, HYAL2, SPHK1, MAGED1, SPPL3, FLNA, PSMB10, TRPM4, S100A4, HLX, CDK19, STK11, TICAM1, RFNG, TKFC, JPH2, S1PR2, LAMTOR4, C1R, TMEM259, C1QTNF2, MAP2K3, VAV2, …	ARRDC3, UBE2D3, SH3BGRL, WIPF1, ARPC5, PSMD5, EEF1E1, WDR35, TERF2IP, COL3A1, CADM1, UBE2N, NFE2L2, PHIP, NOV, PDCD10, ZBTB1, PDGFD, PIK3R1, GPRC5B, UBE2D2, GJA1, DVL3, HSP90AA1, ARL6IP5, YWHAZ, EIF2A, ATP2C1, TMEM33, PIBF1, MAP3K20, DNM1L, EIF2AK2, PSMD12, PDGFRA, RYK, PSMA4, RNF111, CLOCK, RTN4, RBPJ, C2CD5, CDKN2AIP, PSMC6, UBE3A, MAP3K1, PRKACB, CDKN2B, TAF9, MYLK, TRIM13, MTDH, PKD2, HPSE, M…
GO:0006977	DNA damage response, signal transduction...	55	2	0.21	65	0.01872	0.01872	1	1	A cascade of processes induced by the cell cycle regulator phosphoprotein p53, or an equivalent protein, in response to the detection of DNA damage and resulting in the stopping or reduction in rate of the cell cycle	0.562336	-0.803059	PIDD1, PLK3, UBC, MUC1, TNKS1BP1, MDM4, RBL2, E2F1	NPM1, CNOT8, PCNA, CDKN1B, CNOT2, TRIAP1, CNOT1, CNOT4, CNOT6, ATM, CASP2, CNOT10, EP300, SOX4, GADD45A, CNOT9, RGCC, CCNB1, RPL26
GO:0002246	wound healing involved in inflammatory r...	5	1	0.02	66	0.01906	0.01906	1	1	The series of events that restore integrity to damaged tissue that contribute to an inflammatory response	0.388882	0.388882	TGFB1, HMOX1
GO:0007000	nucleolus organization	5	1	0.02	67	0.01906	0.01906	1	1	A process that is carried out at the cellular level which results in the assembly, arrangement of constituent parts, or disassembly of the nucleolus	0.101651	0.101651	RPS19
GO:0009052	pentose-phosphate shunt, non-oxidative b...	5	1	0.02	68	0.01906	0.01906	1	1	The branch of the pentose-phosphate shunt which does not involve oxidation reactions. It comprises a series of sugar phosphate interconversions, starting with ribulose 5-P and producing fructose 6-P and glyceraldehyde 3-P	0.0730164	0.0730164	TKT	RPE
GO:0032274	gonadotropin secretion	5	1	0.02	69	0.01906	0.01906	1	1	The regulated release of a gonadotropin, any hormone that stimulates the gonads, especially follicle-stimulating hormone and luteinizing hormone	0.1457	0.1457	FAM129B, KISS1	TMF1
GO:0033623	regulation of integrin activation	5	1	0.02	1480	0.01906	1	1	1	Any process that modulates the frequency, rate, or extent of integrin activation	0.352979	0.352979	PIEZO1, KIF14
GO:0045080	positive regulation of chemokine biosynt...	5	1	0.02	70	0.01906	0.01906	1	1	Any process that activates or increases the frequency, rate or extent of the chemical reactions and pathways resulting in the formation of chemokines	0.0564256	0.0564256	HMOX1, TICAM1	IL1B, WNT5A
GO:0051029	rRNA transport	5	1	0.02	1481	0.01906	1	1	1	The directed movement of rRNA, ribosomal ribonucleic acid, into, out of or within a cell, or between cells, by means of some agent such as a transporter or pore	0.366127	0.366127	RPSA, TST, PNPT1
GO:0072719	cellular response to cisplatin	5	1	0.02	71	0.01906	0.01906	1	1	Any process that results in a change in state or activity of a cell (in terms of movement, secretion, enzyme production, gene expression, etc.) as a result of a cisplatin stimulus	0.0951509	0.0951509	HMOX1
GO:0090594	inflammatory response to wounding	5	1	0.02	72	0.01906	0.01906	1	1	The immediate defensive reaction by vertebrate tissue to injury caused by chemical or physical agents	0.388882	0.388882	TGFB1, HMOX1
GO:0099638	endosome to plasma membrane protein tran...	5	1	0.02	73	0.01906	0.01906	1	1		-0.0755376	-0.0755376	SCRIB	RAB11A, VPS35
GO:0099639	neurotransmitter receptor transport, end...	5	1	0.02	74	0.01906	0.01906	1	1		-0.0755376	-0.0755376	SCRIB	RAB11A, VPS35
GO:1902946	protein localization to early endosome	5	1	0.02	1482	0.01906	1	1	1	A process in which a protein is transported to, or maintained in, a location within an early endosome	0.175914	0.175914	SCRIB
GO:0008625	extrinsic apoptotic signaling pathway vi...	56	2	0.22	1483	0.01937	1	1	1	A series of molecular signals in which a signal is conveyed from the cell surface to trigger the apoptotic death of a cell. The pathway starts with a ligand binding to a death domain receptor on the cell surface, and ends when the execution phase of apoptosis is triggered	0.647672	-0.687287	PIDD1, HMOX1, MADD, DAB2IP, TRADD, BCL2L1, TNFRSF1A, BID, BAD	PIK3R1, RFFL, STK3, STK4, BLOC1S2, CASP8AP2, TNFAIP3, DDX47
GO:0050777	negative regulation of immune response	56	2	0.22	1484	0.01937	1	1	1	Any process that stops, prevents, or reduces the frequency, rate or extent of the immune response, the immunological reaction of an organism to an immunogenic stimulus	0.771306	-0.737426	BST2, TGFB1, HMOX1, HLX, NR1H2, TYRO3, RPS19, GPR17, BCR, CACTIN, IL27RA, MUL1, NLRC5	COL3A1, SOCS5, RC3H1, TGFB2, LYN, BCL6, CD46, THOC1, TNFAIP3, CD59, C4BPB, NMI
GO:0072431	signal transduction involved in mitotic ...	56	2	0.22	75	0.01937	0.01937	1	1	A signal transduction process that contributes to a mitotic cell cycle G1/S transition DNA damage checkpoint	0.562336	-0.803059	PIDD1, PLK3, UBC, MUC1, TNKS1BP1, MDM4, RBL2, E2F1	NPM1, CNOT8, PCNA, CDKN1B, CNOT2, TRIAP1, CNOT1, CNOT4, CNOT6, ATM, CASP2, CNOT10, EP300, SOX4, GADD45A, CNOT9, RGCC, CCNB1, RPL26
GO:1902400	intracellular signal transduction involv...	56	2	0.22	76	0.01937	0.01937	1	1	Any intracellular signal transduction that is involved in G1 DNA damage checkpoint	0.562336	-0.803059	PIDD1, PLK3, UBC, MUC1, TNKS1BP1, MDM4, RBL2, E2F1	NPM1, CNOT8, PCNA, CDKN1B, CNOT2, TRIAP1, CNOT1, CNOT4, CNOT6, ATM, CASP2, CNOT10, EP300, SOX4, GADD45A, CNOT9, RGCC, CCNB1, RPL26
GO:0010941	regulation of cell death	915	8	3.51	1398	0.02002	0.82192	1	1	Any process that modulates the rate or frequency of cell death. Cell death is the specific activation or halting of processes within a cell so that its vital functions markedly cease, rather than simply deteriorating gradually over time, which culminates in cell death	1.44425	-1.74756	CRYAB, OSGIN1, ADAM8, CARD9, PIDD1, IKBKG, PREX1, EGLN2, NOTCH1, HTT, TGFB1, HMOX1, TSPO, TNFRSF25, SLC35F6, AKR1C3, BIN1, DAPK3, CTSH, PYCR1, HS1BP3, CLIP3, APOE, ATAD3A, GAS6, MADD, SCX, SCRIB, STK40, HYAL2, SPHK1, MAGED1, FLNA, RPL10, PTPA, THRA, CDK19, ZNF16, FAM129B, GCLM, ARHGEF19, PLK3, KATNB1, MAPT, KIF14, TMEM259, ARHGEF4, VAV2, PPM1F, DAB2IP, TYRO3, BCAR1, APBB1, UBC, ALX3, TNFSF12, CAR…	ITGB1, BNIP3L, HIGD1A, EEF1E1, ITGB3BP, PPT1, WDR35, STAT1, NFE2L2, PHIP, PDCD10, TNFRSF11B, FMN2, PIK3R1, TIAM2, ARL6IP5, RASSF3, YWHAZ, DNAJA1, MNAT1, ADNP, MAP3K20, RARB, DNM1L, RFFL, HSPH1, EIF2AK2, NPM1, RTN4, GPAM, CREB1, FAIM, TOPORS, CARD8, ZMYND11, TAF9, TRIM13, MTDH, NAE1, RRM2B, STRADB, PRNP, STK3, RASA1, GDF6, FBXW7, DKK1, CYP1B1, KLHL20, TCP1, GNA13, OMA1, PRKRA, TPT1, MAP2K4, ARL6IP…
GO:0072413	signal transduction involved in mitotic ...	57	2	0.22	77	0.02003	0.02003	1	1	A signal transduction process that contributes to a mitotic cell cycle checkpoint	0.562336	-0.803059	PIDD1, PLK3, UBC, MUC1, TNKS1BP1, MDM4, RBL2, E2F1	NPM1, CNOT8, PCNA, CDKN1B, CNOT2, TRIAP1, CNOT1, CNOT4, CNOT6, ATM, CASP2, CNOT10, EP300, SOX4, GADD45A, CNOT9, RGCC, CCNB1, RPL26
GO:1902402	signal transduction involved in mitotic ...	57	2	0.22	78	0.02003	0.02003	1	1	Any intracellular signal transduction that is involved in mitotic DNA damage checkpoint	0.562336	-0.803059	PIDD1, PLK3, UBC, MUC1, TNKS1BP1, MDM4, RBL2, E2F1	NPM1, CNOT8, PCNA, CDKN1B, CNOT2, TRIAP1, CNOT1, CNOT4, CNOT6, ATM, CASP2, CNOT10, EP300, SOX4, GADD45A, CNOT9, RGCC, CCNB1, RPL26
GO:1902403	signal transduction involved in mitotic ...	57	2	0.22	79	0.02003	0.02003	1	1	Any intracellular signal transduction that is involved in mitotic DNA integrity checkpoint	0.562336	-0.803059	PIDD1, PLK3, UBC, MUC1, TNKS1BP1, MDM4, RBL2, E2F1	NPM1, CNOT8, PCNA, CDKN1B, CNOT2, TRIAP1, CNOT1, CNOT4, CNOT6, ATM, CASP2, CNOT10, EP300, SOX4, GADD45A, CNOT9, RGCC, CCNB1, RPL26
GO:0016337	single organismal cell-cell adhesion	276	4	1.06	308	0.02055	0.08103	1	1	The attachment of one cell to another cell via adhesion molecules, where both cells are part of the same organism	1.00845	-1.46191	LAG3, ADAM8, NPHP4, IGFBP2, NPHP1, TGFB1, EFNB1, AP3D1, ZNF703, PIEZO1, RAPGEF1, GAS6, SCRIB, KIFC3, ARVCF, ZBTB7B, FLNA, SLC7A11, HLX, JUP, TYRO3, CDSN, CEBPB, NECTIN1, CSK, STAT5B, MYL9, CD34, PKP3, ICAM5, NLRP3, BAD, STK10, FANCA, TNFSF9, ICAM3, ITGB3, PKD1, BLOC1S4, CORO1A, MLST8	ITGB1, CD58, NOV, ZBTB1, PIK3R1, HSPH1, PDGFRA, GLMN, GPAM, MARCH7, ITGA4, SOCS5, PRKAR1A, RC3H1, DENND6A, PRNP, SERPINB8, CYP1B1, MAP3K7, HAS2, EFNB2, IL1B, CD47, WNT5A, JAM2, YES1, ZFP36L1, ITGA6, CYFIP2, NCK1, NECTIN3, VCL, PKP2, MYO10, TGFB2, ROCK1, NT5E, EGFR, CDC42, CITED2, DSC2, CD24, CD44, NRXN3, LYN, ZMIZ1, DPP4, PLEKHA7, AP3B1, GCNT1, LAMB1, HSPD1, BCL6, ZC3H8, DUSP3, PTK2, CTNND1, CD46…
GO:0051336	regulation of hydrolase activity	746	7	2.87	1485	0.02112	1	1	1	Any process that modulates the frequency, rate or extent of hydrolase activity, the catalysis of the hydrolysis of various bonds, e.g. C-O, C-N, C-C, phosphoric anhydride bonds, etc. Hydrolase is the systematic name for any enzyme of EC class 3	1.13942	-1.59963	WDR81, BST2, LMTK3, PIDD1, WFIKKN1, PREX1, ARAP1, STMN3, RGS12, HTT, FGFR3, NEIL1, SBF1, RGS3, CTSH, DENND4A, RAPGEF1, PKMYT1, PLXNB1, RANGAP1, GAS6, MADD, SCRIB, PLEKHG4, ARHGEF10L, PTPA, VPS9D1, PLEKHG3, AGAP6, RABEP2, TBC1D22A, MAPK12, RAP1GAP2, TRAPPC9, ARHGEF19, MAPT, LAMTOR4, RALGDS, NR1H2, ARHGEF4, VAV2, PPM1F, DAB2IP, AXIN1, ARHGAP35, GMIP, TBC1D14, TBCD, SIPA1L3, ARFGAP1, RGS20, DEPDC5, …	ITGB1, AGFG1, PPT1, UCHL5, WDR35, POT1, RPGR, OPHN1, TIAM2, DVL3, KDM5A, ARL6IP5, FBXO8, PFN2, NIFK, DNAJA1, SUMO1, DNM1L, RFFL, NPM1, ASAP2, PDGFRA, TRAPPC6B, DEPDC7, SNX13, AC091057.1, USP14, RCBTB2, MPHOSPH10, CARD8, DENND6A, IQGAP1, RASA1, ELMOD2, SERPINB8, PCNA, AHSA2P, SMAP1, DIS3, GNA13, ABCE1, ARL6IP1, PPP1R12A, EPHA4, ARF4, ARHGAP5, PICALM, WNT5A, DNAJC2, FAM13B, CHML, SRGAP2C, PROS1, RB…
GO:0005976	polysaccharide metabolic process	59	2	0.23	80	0.02137	0.02137	1	1	The chemical reactions and pathways involving a polysaccharide, a polymer of many (typically more than 10) monosaccharide residues linked glycosidically	0.688811	-0.821947	B3GNT3, TGFB1, STK40, C1QTNF2, PYGB, GAA, UBC, STBD1, PHKA2	UGP2, PPP1CC, AGL, HAS2, CALM2, PPP1CB, GYG1, PPP1R2, PGM2
GO:0072395	signal transduction involved in cell cyc...	59	2	0.23	81	0.02137	0.02137	1	1	A signal transduction process that contributes to a cell cycle checkpoint	0.562336	-0.803059	PIDD1, PLK3, UBC, MUC1, TNKS1BP1, MDM4, RBL2, E2F1	NPM1, CNOT8, PCNA, CDKN1B, CNOT2, TRIAP1, CNOT1, CNOT4, CNOT6, ATM, CASP2, CNOT10, EP300, SOX4, GADD45A, CNOT9, RGCC, CCNB1, RPL26
GO:0072401	signal transduction involved in DNA inte...	59	2	0.23	82	0.02137	0.02137	1	1	A signal transduction process that contributes to a DNA integrity checkpoint	0.562336	-0.803059	PIDD1, PLK3, UBC, MUC1, TNKS1BP1, MDM4, RBL2, E2F1	NPM1, CNOT8, PCNA, CDKN1B, CNOT2, TRIAP1, CNOT1, CNOT4, CNOT6, ATM, CASP2, CNOT10, EP300, SOX4, GADD45A, CNOT9, RGCC, CCNB1, RPL26
GO:0072422	signal transduction involved in DNA dama...	59	2	0.23	83	0.02137	0.02137	1	1	A signal transduction process that contributes to a DNA damage checkpoint	0.562336	-0.803059	PIDD1, PLK3, UBC, MUC1, TNKS1BP1, MDM4, RBL2, E2F1	NPM1, CNOT8, PCNA, CDKN1B, CNOT2, TRIAP1, CNOT1, CNOT4, CNOT6, ATM, CASP2, CNOT10, EP300, SOX4, GADD45A, CNOT9, RGCC, CCNB1, RPL26
GO:0002697	regulation of immune effector process	156	3	0.6	1045	0.02154	0.42617	1	1	Any process that modulates the frequency, rate, or extent of an immune effector process	1.07586	-1.15045	HTRA1, LAG3, BST2, EXOSC6, TGFB1, HMOX1, RAPGEF1, SEMA7A, TRPM4, HLX, TKFC, AP1B1, RPS19, BCR, TARBP2, GAB2, RNF216, AP1M1, STAT5B, FZD5, SUPT6H, NLRP3, IL27RA, MUL1, ATAD5	CADM1, ZBTB1, GPRC5B, EIF2AK2, AP1S2, SOCS5, RC3H1, ELMOD2, ANKRD17, MAP3K7, PUM2, IL1B, WNT5A, PUM1, PROS1, B2M, MSH6, SIN3A, MSH2, BIRC2, EXOSC3, VAMP7, SNX4, TGFB2, LYN, ATG5, AP1G1, TSPAN6, HSPD1, TLR4, BCL6, UNG, CD46, TRAF6, STYK1, THOC1, TRIM6, TNFAIP3, CD59, IL6, GATA3, MICB, C4BPB
GO:0010646	regulation of cell communication	1719	12	6.6	1043	0.02188	0.42377	1	1	Any process that modulates the frequency, rate or extent of cell communication. Cell communication is the process that mediates interactions between a cell and its surroundings. Encompasses interactions such as signaling or attachment between one cell and another cell, between a cell and an extracellular matrix, or between a cell and any other aspect of its environment	1.31144	-1.86953	HTRA1, ADAM8, CARD9, TNFRSF19, BST2, LRP8, PSMA6, PIDD1, IKBKG, RHOF, PREX1, FZD8, PPFIA3, CRTC1, ARAP1, STMN3, SUFU, RGS12, NPHP4, RHOBTB2, NOTCH1, HTT, IGFBP2, FGFR3, TGFB1, HMOX1, LAMA2, MAPK11, SZT2, CSF1, GDPD5, LZTS1, CTNNBIP1, PDE4A, SLC35F6, MC1R, AKR1C3, ABCA7, RGS3, ZNF703, DAPK3, CTSH, RAPGEF1, SOCS7, SPPL2B, GFI1, PALM3, SYT11, GPSM1, GLIS2, CLIP3, APOE, PLXNB1, ANAPC2, FBXL15, GAS6, …	ITGB1, ZNF675, ARRDC3, SH3BGRL, PSMD5, EEF1E1, BCHE, DYRK1A, RHOQ, WDR35, TERF2IP, TOPBP1, COL3A1, BICC1, STAT1, UBE2N, NFE2L2, PHIP, C3orf58, NOV, NETO2, PDCD10, LINC02210-CRHR1, OPHN1, PDGFD, PIK3R1, TIAM2, GPRC5B, GJA1, DVL3, TAF5, ARL6IP5, FBXO8, PFN2, SNX3, YWHAZ, EIF2A, ATP2C1, TMEM33, DNAJA1, PIBF1, SUMO1, ADNP, MAP3K20, DNM1L, RFFL, HSPH1, EIF2AK2, PSMD12, TRIM33, MED13, PDGFRA, DEPDC7, S…
GO:0042274	ribosomal small subunit biogenesis	60	2	0.23	1486	0.02205	1	1	1	A cellular process that results in the biosynthesis of constituent macromolecules, assembly, and arrangement of constituent parts of a small ribosomal subunit; includes transport to the sites of protein synthesis	0.512076	-0.805456	TBL3, RPSA, RPS19, RPS28, RPS10, RPS21	UTP3, MPHOSPH10, NOL11, UTP23, LTV1, MRPS9, UTP4, UTP14C, RIOK1, HEATR1, DCAF13, UTP18, RPS24, UTP6
GO:1901184	regulation of ERBB signaling pathway	60	2	0.23	1487	0.02205	1	1	1	Any process that modulates the frequency, rate or extent of ERBB signaling pathway	0.583586	-0.842572	ARAP1, DAB2IP, UBC, CBL, PDE6G, SOCS4, MVB12A, PTPN3, RHBDF2, EPN1	RTN4, RBPJ, SOCS5, FBXW7, PTPN12, RAB7A, AFAP1L2, EGFR, CDC42, SPRY2, SH3KBP1, ERRFI1
GO:0071897	DNA biosynthetic process	159	3	0.61	84	0.02264	0.02264	1	1	The cellular DNA metabolic process resulting in the formation of DNA, deoxyribonucleic acid, one of the two main types of nucleic acid, consisting of a long unbranched macromolecule formed from one or two strands of linked deoxyribonucleotides, the 3'-phosphate group of each constituent deoxyribonucleotide being joined in 3',5'-phosphodiester linkage to the 5'-hydroxyl group of the deoxyribose mo…	0.703838	-1.30455	USP43, WRAP53, ISG15, PIF1, FAM129B, UBC, POLL, FAAP20, PNKP, PRKD2, TNKS1BP1, POLD1, PDGFRB, POLD4, POLE, HSP90AB1, NHP2, SH2B1, MYBBP1A	PTGES3, TERF2IP, POLE2, POT1, ZBTB1, GJA1, HSP90AA1, POLD3, PCNA, TCP1, RFC4, TNKS2, DNAJC2, REV1, EXO1, SIRT1, HNRNPC, RBBP8, DTL, FBXO4, TYMS, CCT6A, BRIP1, HNRNPD, TERF2, ATM, PRIM2, PRIMPOL, RAD51C, NEK7, KLF4, POLE3, CHRAC1, PCLAF, RPA2, KCNK2, RGCC, SPRTN, RMI2, XRCC5, POLB
GO:0031571	mitotic G1 DNA damage checkpoint	61	2	0.23	85	0.02274	0.02274	1	1	A mitotic cell cycle checkpoint that detects and negatively regulates progression through the G1/S transition of the cell cycle in response to DNA damage	0.566749	-0.803649	PIDD1, PLK3, UBC, MUC1, TNKS1BP1, MDM4, RBL2, FBXO31, E2F1	NPM1, CNOT8, PCNA, CDKN1B, CNOT2, TRIAP1, CNOT1, CNOT4, CNOT6, RFWD3, ATM, CASP2, CNOT10, EP300, SOX4, GADD45A, RPA2, CNOT9, RGCC, CCNB1, RPL26
GO:0044819	mitotic G1/S transition checkpoint	61	2	0.23	86	0.02274	0.02274	1	1	A cell cycle checkpoint that detects and negatively regulates progression from G1 to S phase as part of a mitotic cell cycle	0.566749	-0.803649	PIDD1, PLK3, UBC, MUC1, TNKS1BP1, MDM4, RBL2, FBXO31, E2F1	NPM1, CNOT8, PCNA, CDKN1B, CNOT2, TRIAP1, CNOT1, CNOT4, CNOT6, RFWD3, ATM, CASP2, CNOT10, EP300, SOX4, GADD45A, RPA2, CNOT9, RGCC, CCNB1, RPL26
GO:0051347	positive regulation of transferase activ...	429	5	1.65	87	0.02275	0.02275	1	1	Any process that activates or increases the frequency, rate or extent of transferase activity, the catalysis of the transfer of a group, e.g. a methyl group, glycosyl group, acyl group, phosphorus-containing, or other groups, from a donor compound to an acceptor	1.11006	-1.5595	ADAM8, LRP8, CCNK, PSMA6, PRKAR1B, IKBKG, FZD8, FGFR3, TGFB1, MAPK11, WRAP53, CSF1, CDK20, RAPGEF1, ANAPC2, GAS6, CSPG4, MADD, MAGED1, PSMB10, STK11, ZNF16, S1PR2, MAPT, KIF14, C1QTNF2, MAP2K3, VAV2, DAB2IP, AXIN1, CAMKK1, UBC, TELO2, CARD10, AKAP13, PTPN1, HRAS, MAPK8IP3, RASSF2, PILRB, CSK, AMBRA1, DGKQ, SERINC2, DBNL, ANAPC11, PNKP, PDE6G, MAP3K11, UCN, CDC6, FZD5, ANAPC7, CCND3, BAD, TIAM1, M…	ARRDC3, PSMD5, DCUN1D4, PTGES3, UBE2N, POT1, PDCD10, PDGFD, GPRC5B, DVL3, HSP90AA1, PIBF1, MNAT1, ADNP, MAP3K20, HSPH1, EIF2AK2, PSMD12, DCUN1D5, PDGFRA, PSMA4, PSMC6, PPP2R3C, MAP3K1, PRKACB, CDC27, TOPORS, CDC23, PKD2, MAP4K5, PRKAR1A, SPAG9, STRADB, IQGAP1, NRK, STK3, MAP4K3, FBXW7, PSMA1, CCNH, MAP3K7, TCP1, MAP2K4, RFC4, EPHA4, IL1B, WNT5A, TAOK3, CCNC, ANAPC10, TAB2, COPS8, CALM2, CDKN1B, S…
GO:0002093	auditory receptor cell morphogenesis	6	1	0.02	88	0.02283	0.02283	1	1	Any process that alters the size or shape of an auditory receptor cell	0.0401245	0.0401245	SCRIB
GO:0010992	ubiquitin homeostasis	6	1	0.02	89	0.02283	0.02283	1	1	Any process involved in the maintenance of an internal steady state of ubiquitin monomers and free ubiquitin chains at the level of the cell	-0.0598472	-0.0598472	UBC	TRIM6
GO:0030207	chondroitin sulfate catabolic process	6	1	0.02	90	0.02283	0.02283	1	1	The chemical reactions and pathways resulting in the breakdown of chondroitin sulfate, any member of a group of 10-60 kDa glycosaminoglycans, widely distributed in cartilage and other mammalian connective tissues, the repeat units of which consist of beta-(1,4)-linked D-glucuronyl beta-(1,3)-N-acetyl-D-galactosamine sulfate	0.00289561	0.00289561	CSPG4, IDUA	VCAN, HEXB
GO:0030948	negative regulation of vascular endothel...	6	1	0.02	91	0.02283	0.02283	1	1	Any process that stops, prevents, or reduces the frequency, rate or extent of vascular endothelial growth factor receptor signaling pathway activity	0.364966	0.364966	FAM129B, DAB2IP, PTPN1, HHEX
GO:0033632	regulation of cell-cell adhesion mediate...	6	1	0.02	1488	0.02283	1	1	1	Any process that modulates the frequency, rate, or extent of cell-cell adhesion mediated by integrin	0.14466	0.14466	PIEZO1	DPP4
GO:0034111	negative regulation of homotypic cell-ce...	6	1	0.02	92	0.02283	0.02283	1	1	Any process that stops, prevents, or reduces the frequency, rate, or extent of homotypic cell-cell adhesion	0.0188563	0.0188563	ZNF703
GO:0034331	cell junction maintenance	6	1	0.02	1489	0.02283	1	1	1	The organization process that preserves a cell junction in a stable functional or structural state. A cell junction is a specialized region of connection between two cells or between a cell and the extracellular matrix	-0.129538	-0.129538	KIFC3, PARD6A	RASSF8, PKP2, PLEKHA7
GO:0048312	intracellular distribution of mitochondr...	6	1	0.02	93	0.02283	0.02283	1	1	Any process that establishes the spatial arrangement of mitochondria within the cell	0.0382595	0.0382595	CLUH, MAPT, KAT2A	DNM1L, SYNJ2BP
GO:0060074	synapse maturation	6	1	0.02	94	0.02283	0.02283	1	1	The process that organizes a synapse so that it attains its fully functional state. Synaptic maturation plays a critical role in the establishment of effective synaptic connections in early development	0.249898	0.249898	ANAPC2, DAB2IP, NFATC4	NRXN3
GO:0060263	regulation of respiratory burst	6	1	0.02	1490	0.02283	1	1	1	Any process that modulates the rate frequency or extent of a phase of elevated metabolic activity, during which oxygen consumption increases; this leads to the production, by an NADH dependent system, of hydrogen peroxide (H2O2), superoxide anions and hydroxyl radicals	0.409556	0.409556	NOXA1, RPS19, BCR
GO:0090128	regulation of synapse maturation	6	1	0.02	95	0.02283	0.02283	1	1	Any process that modulates the extent of synapse maturation, the process that organizes a synapse so that it attains its fully functional state	0.249898	0.249898	ANAPC2, DAB2IP, NFATC4	NRXN3
GO:0097120	receptor localization to synapse	6	1	0.02	96	0.02283	0.02283	1	1	Any process in which a receptor is transported to, and/or maintained at the synapse, the junction between a nerve fiber of one neuron and another neuron or muscle fiber or glial cell	0.176692	0.176692	SCRIB, CNIH2, DLG3	CEP112
GO:1904706	negative regulation of vascular smooth m...	6	1	0.02	97	0.02283	0.02283	1	1		-0.0216294	-0.0216294	HMOX1	CDKN1B, TPM1
GO:0051247	positive regulation of protein metabolic...	940	8	3.61	98	0.0232	0.0232	1	1	Any process that activates or increases the frequency, rate or extent of the chemical reactions and pathways involving a protein	1.20434	-1.6219	ADAM8, CARD9, TNFRSF19, LRP8, CCNK, PSMA6, PIDD1, PRKAR1B, IKBKG, EGLN2, FZD8, FGFR3, TGFB1, HMOX1, MAPK11, CSF1, CDK20, CNPY2, ABCA7, CTSH, RAPGEF1, CLIP3, APOE, ANAPC2, GAS6, CSPG4, MADD, SEMA7A, CDK9, SREBF1, TOLLIP, SPHK1, MAGED1, SPPL3, PSMB10, PTPA, PXYLP1, STK11, TICAM1, MAPK12, BRAT1, S1PR2, PLK3, MAPT, KIF14, TMEM259, C1QTNF2, MAP2K3, NR1H2, PPM1F, DAB2IP, RNF166, AXIN1, CAMKK1, SEMA4C, …	ARRDC3, PSMD5, DCUN1D4, DYRK1A, WDR35, EIF3E, TERF2IP, UBE2N, NFE2L2, PDCD10, PDGFD, GPRC5B, GJA1, DVL3, ARL6IP5, PAIP1, PFN2, PIBF1, MNAT1, SUMO1, ADNP, MAP3K20, EED, SEC22B, HSPH1, EIF2AK2, PSMD12, NPM1, DCUN1D5, FAM129A, PDGFRA, GLMN, RYK, PSMA4, RNF20, RNF111, PSMC6, PPP2R3C, UBE3A, MAP3K1, PRKACB, CDC27, TOPORS, CARD8, CDC23, PKD2, MAP4K5, SOCS5, PRKAR1A, SPAG9, STRADB, PRNP, IQGAP1, NRK, ST…
GO:0044783	G1 DNA damage checkpoint	62	2	0.24	99	0.02345	0.02345	1	1	A cell cycle checkpoint that detects and negatively regulates progression from G1 to S phase in the cell cycle in response to DNA damage	0.566749	-0.803649	PIDD1, PLK3, UBC, MUC1, TNKS1BP1, MDM4, RBL2, FBXO31, E2F1	NPM1, CNOT8, PCNA, CDKN1B, CNOT2, TRIAP1, CNOT1, CNOT4, CNOT6, RFWD3, ATM, CASP2, CNOT10, EP300, SOX4, GADD45A, RPA2, CNOT9, RGCC, CCNB1, WAC, RPL26
GO:0031325	positive regulation of cellular metaboli...	1742	12	6.69	307	0.02414	0.07932	1	1	Any process that activates or increases the frequency, rate or extent of the chemical reactions and pathways by which individual cells transform chemical substances	1.26833	-1.6898	SPP1, ADAM8, CARD9, TNFRSF19, LRP8, CCNK, PSMA6, PIDD1, PRKAR1B, IKBKG, BRF1, FZD8, CRTC1, ARAP1, RTEL1, KLF6, EXOSC6, NOTCH1, HTT, TEF, FGFR3, TGFB1, MEF2D, HMOX1, NRF1, MAPK11, TSPO, WRAP53, CSF1, CDK20, CNPY2, MC1R, AKR1C3, ABCA7, ZGLP1, CTSH, RAPGEF1, GLIS2, CLIP3, HELZ2, APOE, ANAPC2, GAS6, CSPG4, MADD, SCX, SEMA7A, CDK9, SCRIB, SREBF1, WDR5, TOLLIP, ZBTB7B, HYAL2, SPHK1, MAGED1, SPPL3, PSMB…	ARRDC3, BNIP3L, PSMD5, DCUN1D4, DYRK1A, PTGES3, RHOQ, WDR35, EIF3E, TERF2IP, THRB, STAT1, UBE2N, NFE2L2, ANKRD49, POT1, PHIP, YEATS4, IFT74, MED21, PDCD10, LINC02210-CRHR1, PDGFD, PIK3R1, GPRC5B, DVL3, MKL2, HSP90AA1, KDM5A, ARL6IP5, PAIP1, GTF2F2, PFN2, MED4, EIF2A, PIBF1, MNAT1, SUMO1, ADNP, CBFB, MAP3K20, EED, RARB, HSPH1, EIF2AK2, BPTF, PSMD12, NPM1, DCUN1D5, CHURC1, FAM129A, ARPP19, TBL1XR1,…
GO:0010604	positive regulation of macromolecule met...	1752	12	6.73	323	0.02517	0.0819	1	1	Any process that increases the frequency, rate or extent of the chemical reactions and pathways involving macromolecules, any molecule of high relative molecular mass, the structure of which essentially comprises the multiple repetition of units derived, actually or conceptually, from molecules of low relative molecular mass	1.26833	-1.65239	SPP1, ADAM8, CARD9, TNFRSF19, LRP8, CCNK, PSMA6, PIDD1, PRKAR1B, IKBKG, BRF1, EGLN2, FZD8, CRTC1, ARAP1, RTEL1, KLF6, EXOSC6, NOTCH1, TEF, FGFR3, TGFB1, MEF2D, HMOX1, NRF1, MAPK11, WRAP53, CSF1, CDK20, CNPY2, MC1R, ABCA7, ZGLP1, CTSH, RAPGEF1, GLIS2, CLIP3, HELZ2, APOE, ANAPC2, GAS6, CSPG4, MADD, SCX, SEMA7A, CDK9, SCRIB, SREBF1, WDR5, TOLLIP, ZBTB7B, HYAL2, SPHK1, MAGED1, SPPL3, PSMB10, PTPA, TH…	ARRDC3, PSMD5, DCUN1D4, DYRK1A, PTGES3, RHOQ, WDR35, EIF3E, TERF2IP, THRB, STAT1, UBE2N, NFE2L2, ANKRD49, POT1, PHIP, YEATS4, IFT74, MED21, PDCD10, PDGFD, PIK3R1, GPRC5B, GJA1, DVL3, MKL2, HSP90AA1, KDM5A, ARL6IP5, PAIP1, TAF1D, GTF2F2, PFN2, MED4, EIF2A, PIBF1, MNAT1, SUMO1, ADNP, CBFB, MAP3K20, EED, RARB, SEC22B, HSPH1, DDX21, EIF2AK2, BPTF, PSMD12, NPM1, DCUN1D5, CHURC1, FAM129A, TBL1XR1, MED1…
GO:0044699	single-organism process	6762	31	25.97	950	0.02523	0.35407	1	1	A biological process that involves only one organism	1.97482	-2.15371	CRYAB, SPNS2, HTRA1, IGFBP7, OSGIN1, SPP1, TSNARE1, TMEM38A, TMX1, SEMA6C, TSPAN9, APLP1, ADAM11, LAG3, TMEM8B, NOXA1, ADAM8, CARD9, TPGS1, TMEM65, TNFRSF19, BST2, AKAP10, FTCD, PNPLA7, AL928654.3, TIE1, LRP8, CCNK, SEMA6B, PSMA6, ADAMTS1, PIDD1, PRKAR1B, IKBKG, WFIKKN1, B3GNT3, PHC1, RHOF, ASPHD1, KLF16, PREX1, EGLN2, REC8, FZD8, IBA57, WDR33, PPFIA3, CRTC1, TOM1, SLC9B1, IPO4, ANKRD11, IPPK, AR…	ITGB1, YPEL5, ZNF675, CENPQ, KLF3, CCNG1, GEM, CD58, ARRDC3, UBE2D3, EXTL2, SH3BGRL, BNIP3L, ELOVL7, MINPP1, ENTPD7, HIGD1A, WIPF1, ARPC5, SNRK, ATP5F1EP2, NEDD1, PSMD5, EEF1E1, ITGB3BP, CETN2, LRRCC1, PPCS, PLPP5, BCHE, RNASEH2B, MTBP, AGFG1, PPT1, PGM3, DYRK1A, PTGES3, ALKBH8, DRAM2, RHOQ, UCHL5, SLC39A6, CUL5, WDR35, KPNA3, TANC1, UTRN, TERF2IP, TOPBP1, THRB, EXOC5, IREB2, COL3A1, BICC1, PEX3,…
GO:0017015	regulation of transforming growth factor...	65	2	0.25	100	0.02561	0.02561	1	1	Any process that modulates the frequency, rate or extent of activity of any TGF-beta receptor signaling pathway	0.765897	-0.85042	HTRA1, TGFB1, ZNF703, STK11, UBC, VASN, SMAD6, LTBP1, ENG, HSP90AB1, CD109	TRIM33, RNF111, CDKN2B, SMURF2, STRAP, SIRT1, ING2, CITED2, SDCBP, SNW1, TGFBR1, SNX25
GO:1903844	regulation of cellular response to trans...	66	2	0.25	101	0.02634	0.02634	1	1		0.765897	-0.85042	HTRA1, TGFB1, ZNF703, STK11, UBC, VASN, SMAD6, LTBP1, ENG, HSP90AB1, CD109	TRIM33, RNF111, CDKN2B, SMURF2, STRAP, SIRT1, ING2, CITED2, SDCBP, SNW1, TGFBR1, SNX25
GO:0002719	negative regulation of cytokine producti...	7	1	0.03	1491	0.02658	1	1	1	Any process that stops, prevents, or reduces the frequency, rate, or extent of cytokine production contributing to an immune response	0.299786	0.299786	BST2, TGFB1, HMOX1	TGFB2, BCL6
GO:0030208	dermatan sulfate biosynthetic process	7	1	0.03	102	0.02658	0.02658	1	1	The chemical reactions and pathways resulting in the formation of dermatan sulfate, any glycosaminoglycan with repeats consisting of beta-(1,4)-linked L-iduronyl-beta-(1,3)-N-acetyl-D-galactosamine 4-sulfate units	0.00536035	0.00536035	CSPG4, CHST12	VCAN, DSE
GO:0033601	positive regulation of mammary gland epi...	7	1	0.03	103	0.02658	0.02658	1	1	Any process that activates or increases the rate or extent of mammary gland epithelial cell proliferation	-0.165466	-0.165466	ZNF703	RTN4, IQGAP3
GO:0042033	chemokine biosynthetic process	7	1	0.03	104	0.02658	0.02658	1	1	The chemical reactions and pathways resulting in the formation of chemokines, any member of a family of small chemotactic cytokines; their name is derived from their ability to induce directed chemotaxis in nearby responsive cells. All chemokines possess a number of conserved cysteine residues involved in intramolecular disulfide bond formation. Some chemokines are considered pro-inflammatory and…	0.032238	0.032238	HMOX1, TICAM1	IL1B, WNT5A, IL6
GO:0045073	regulation of chemokine biosynthetic pro...	7	1	0.03	105	0.02658	0.02658	1	1	Any process that modulates the frequency, rate or extent of the chemical reactions and pathways resulting in the formation of chemokines	0.032238	0.032238	HMOX1, TICAM1	IL1B, WNT5A, IL6
GO:0046826	negative regulation of protein export fr...	7	1	0.03	106	0.02658	0.02658	1	1	Any process that stops, prevents, or reduces the frequency, rate or extent of the directed movement of proteins from the nucleus into the cytoplasm	0.0334297	0.0334297	RANGAP1	SOX4
GO:0050755	chemokine metabolic process	7	1	0.03	107	0.02658	0.02658	1	1	The chemical reactions and pathways involving chemokines, any member of a family of small chemotactic cytokines; their name is derived from their ability to induce directed chemotaxis in nearby responsive cells. All chemokines possess a number of conserved cysteine residues involved in intramolecular disulfide bond formation. Some chemokines are considered pro-inflammatory and can be induced duri…	0.032238	0.032238	HMOX1, TICAM1	IL1B, WNT5A, IL6
GO:1902018	negative regulation of cilium assembly	7	1	0.03	1492	0.02658	1	1	1	Any process that stops, prevents or reduces the frequency, rate or extent of cilium assembly	0.209493	0.209493	MAP4, EVI5L
GO:1902414	protein localization to cell junction	7	1	0.03	1493	0.02658	1	1	1	A process in which a protein is transported to, or maintained in, a location within a cell junction	0.319709	0.319709	SCRIB, NECTIN1, ACTN4, LSR, MAPK9	NECTIN3
GO:0051436	negative regulation of ubiquitin-protein...	68	2	0.26	108	0.02784	0.02784	1	1	Any process that stops, prevents, or reduces the frequency, rate or extent of ubiquitin ligase activity that contributes to the mitotic cell cycle	0.596815	-1.06549	PSMA6, ANAPC2, PSMB10, UBC, ANAPC11, ANAPC7, FZR1	PSMD5, PSMD12, PSMA4, PSMC6, CDC27, CDC23, PSMA1, ANAPC10, UBE2E1, PSMD10, PSMD14, PSMD6, PSMD7, PSMA3, CCNB1
GO:0051439	regulation of ubiquitin-protein ligase a...	69	2	0.26	109	0.02861	0.02861	1	1	A cell cycle process that modulates the frequency, rate or extent of ubiquitin ligase activity that contributes to the mitotic cell cycle	0.596815	-1.06549	PSMA6, ANAPC2, PSMB10, UBC, ANAPC11, ANAPC7, FZR1	PSMD5, PSMD12, PSMA4, PSMC6, CDC27, CDC23, PSMA1, ANAPC10, UBE2E1, PSMD10, PSMD14, PSMD6, PSMD7, PSMA3, CCNB1
GO:0000278	mitotic cell cycle	799	7	3.07	286	0.02954	0.07148	1	1	Progression through the phases of the mitotic cell cycle, the most common eukaryotic cell cycle, which canonically comprises four successive phases called G1, S, G2, and M and includes replication of the genome and the subsequent segregation of chromosomes into daughter cells. In some variant cell cycles nuclear replication or nuclear division may not be followed by cell division, or G1 and G2 ph…	1.04304	-1.86233	TMEM8B, CCNK, PSMA6, PIDD1, RTEL1, HTT, TGFB1, SSSCA1, LZTS1, DAPK3, GFI1, PKMYT1, ANAPC2, FBXL15, SCRIB, SPHK1, FLNA, PSMB10, KLHL22, PTPA, CDK19, MAU2, PTCH1, USP3, ALMS1, PLK3, KATNB1, KIF14, PNPT1, SUN2, MAP4, TBCD, UBC, CUL7, FSD1, RECQL5, MCM2, CTDP1, HINFP, WASL, HRAS, HSF1, WDR62, MUC1, TFAP4, KLHL21, BCL2L1, AURKAIP1, E2F8, SSNA1, HUS1, ANAPC11, SKP2, CDC6, FOXM1, INCENP, CEP131, AURKC, …	ITGB1, CCNG1, GEM, NEDD1, PSMD5, ITGB3BP, CETN2, LRRCC1, RNASEH2B, MTBP, CUL5, TOPBP1, POLE2, PHIP, YEATS4, CETN3, ZNF655, NUSAP1, CHMP2B, HSP90AA1, GSPT1, DYNC1LI1, PIBF1, MNAT1, PRIM1, PSMD12, NPM1, ARPP19, PSMA4, MYBL1, DYNLT3, UBA3, SMC4, CDC7, PSMC6, CEP55, NUP35, CDC27, BUB1, CKAP2, CNOT8, CDKN2B, CDC23, DBF4, HAUS3, ANAPC13, PKD2, HMMR, NAE1, DLGAP5, NUPL2, RASA1, PSMA1, SYF2, PCNA, CCNH, …
GO:0040011	locomotion	800	7	3.07	514	0.02972	0.14251	1	1	Self-propelled movement of a cell or organism from one location to another	1.30972	-1.71755	SPNS2, SEMA6C, ADAM8, TPGS1, BST2, TIE1, PREX1, SLC9B1, ITGB4, NPHP4, NOTCH1, ELMO3, TGFB1, HMOX1, LAMA2, CERS2, EFNB1, PPIL2, TSPO, SCN1B, CSF1, PGF, ZNF703, DAPK3, CTSH, SOCS7, PC, CDC42BPB, APOE, PLXNB1, TRPM2, GAS6, CSPG4, SCRIB, NEO1, IGFBP5, HYAL2, SPHK1, FLNA, TRPM4, SLC7A11, BOC, FAM129B, BRAT1, KIF14, POMGNT2, FSCN1, GPC1, HDAC5, SPECC1L, VAV2, PPM1F, DAB2IP, JUP, TYRO3, SUN2, BCAR1, ARH…	ITGB1, CD58, ARRDC3, ARPC5, COL3A1, NFE2L2, NOV, PDCD10, OPHN1, PDGFD, PIK3R1, PHLDB2, CHMP2B, PFN2, CPNE3, DNAJA1, RFFL, PDGFRA, RYK, RNF20, RTN4, CREB1, USP14, ITGA4, PALLD, MYLK, TRIM13, PTPRK, PSG1, CCNYL1, SPAG9, IQGAP1, MCC, MATN2, CLIC4, CYP1B1, GNA13, HAS2, EFNB2, RAB11A, EPHA4, IL1B, ASPM, ARF4, CD47, DPYSL2, WNT5A, DNAH11, NEXN, ANLN, JAM2, SMURF2, STRAP, DST, SRGAP2C, PROS1, YES1, SPAG…
GO:0071158	positive regulation of cell cycle arrest	71	2	0.27	110	0.03016	0.03016	1	1	Any process that increases the rate, frequency, or extent of cell cycle arrest, the process in which the cell cycle is halted during one of the normal phases	0.664796	-0.852794	PIDD1, TGFB1, PLK3, DAB2IP, UBC, MUC1, PPP2R5B, TNKS1BP1, MDM4, FOXO4, RBL2, E2F1, MYBBP1A	NPM1, CNOT8, PKD2, PCNA, CDKN1B, CNOT2, TRIAP1, CNOT1, CNOT4, CNOT6, ATM, CASP2, CNOT10, EP300, UHRF2, SOX4, GADD45A, CNOT9, RGCC, CCNB1, RPL26
GO:0071902	positive regulation of protein serine/th...	178	3	0.68	111	0.0303	0.0303	1	1	Any process that increases the rate, frequency, or extent of protein serine/threonine kinase activity	0.972551	-1.21832	ADAM8, CCNK, IKBKG, FZD8, TGFB1, MAPK11, CSPG4, MADD, MAGED1, STK11, S1PR2, C1QTNF2, MAP2K3, DAB2IP, AXIN1, UBC, TELO2, CARD10, AKAP13, PTPN1, HRAS, MAPK8IP3, CSK, DBNL, PDE6G, MAP3K11, CDC6, FZD5, CCND3, TIAM1, MUL1, PDGFRB, AVPI1, MAP3K10, MAP3K6, HSP90AB1, MAPKAPK2, PKD1, MLST8	UBE2N, PDCD10, PDGFD, DVL3, MNAT1, MAP3K20, PKD2, MAP4K5, SPAG9, IQGAP1, STK3, MAP4K3, CCNH, MAP3K7, MAP2K4, EPHA4, IL1B, WNT5A, TAOK3, CCNC, TAB2, COPS8, CALM2, CDKN1B, SIRT1, CCNT1, PSMD10, HACD3, FGF2, EGFR, CD24, STK4, RALB, SPRY2, IQGAP3, TLR4, CKS1B, CCNL1, TRAF6, MAP4K2, RAPGEF2, ALS2, ERCC6, GADD45A, PRKAA1, ATP2B4, PDGFC, ETAA1, RGCC, CCNB1, LPAR1
GO:0000447	endonucleolytic cleavage in ITS1 to sepa...	8	1	0.03	112	0.03033	0.03033	1	1	Endonucleolytic cleavage between the SSU-rRNA and the 5.8S rRNA of an rRNA molecule originally produced as a tricistronic rRNA transcript that contained the Small SubUnit (SSU) rRNA, the 5.8S rRNA, and the Large SubUnit (LSU) rRNA, in that order, from 5' to 3' along the primary transcript	0.165427	0.165427	RPSA, RPS21
GO:0019321	pentose metabolic process	8	1	0.03	1494	0.03033	1	1	1	The chemical reactions and pathways involving a pentose, any monosaccharide with a chain of five carbon atoms in the molecule	0.0212169	0.0212169	TKT	RPE
GO:0030205	dermatan sulfate metabolic process	8	1	0.03	113	0.03033	0.03033	1	1	The chemical reactions and pathways involving dermatan sulfate, any of a group of glycosaminoglycans with repeats consisting of beta-(1,4)-linked L-iduronyl-beta-(1,3)-N-acetyl-D-galactosamine 4-sulfate units. They are important components of ground substance or intercellular cement of skin and some connective tissues	0.0738907	0.0738907	CSPG4, IDUA, CHST12	VCAN, DSE
GO:0033630	positive regulation of cell adhesion med...	8	1	0.03	1495	0.03033	1	1	1	Any process that activates or increases the frequency, rate, or extent of cell adhesion mediated by integrin	-0.100698	-0.100698	PIEZO1	IFT74, TGFB2
GO:0035089	establishment of apical/basal cell polar...	8	1	0.03	114	0.03033	0.03033	1	1	The specification and formation of the polarity of a cell along its apical/basal axis	-0.0167921	-0.0167921	SCRIB, FSCN1	WNT5A, PRKCI
GO:0046184	aldehyde biosynthetic process	8	1	0.03	1496	0.03033	1	1	1	The chemical reactions and pathways resulting in the formation of aldehydes, any organic compound with the formula R-CH=O	0.026215	0.026215	PDXK, TKT	KDM3A, REST
GO:0060644	mammary gland epithelial cell differenti...	8	1	0.03	115	0.03033	0.03033	1	1	The process in which a relatively unspecialized epithelial cell becomes a more specialized epithelial cell of the mammary gland	0.347215	0.347215	ZNF703, PTCH1, CEBPB
GO:0072718	response to cisplatin	8	1	0.03	116	0.03033	0.03033	1	1	Any process that results in a change in state or activity of a cell or an organism (in terms of movement, secretion, enzyme production, gene expression, etc.) as a result of a cisplatin stimulus	0.122948	0.122948	HMOX1
GO:0098969	neurotransmitter receptor transport to p...	8	1	0.03	117	0.03033	0.03033	1	1		0.0579016	0.0579016	SCRIB	RAB11A, RAB8A
GO:1903539	protein localization to postsynaptic mem...	8	1	0.03	118	0.03033	0.03033	1	1	A process in which a protein is transported to, or maintained in, a location within a postsynaptic membrane	0.0579016	0.0579016	SCRIB	RAB11A, RAB8A
GO:1903540	establishment of protein localization to...	8	1	0.03	119	0.03033	0.03033	1	1	The directed movement of a protein to a specific location in a postsynaptic membrane	0.0579016	0.0579016	SCRIB	RAB11A, RAB8A
GO:0051437	positive regulation of ubiquitin-protein...	72	2	0.28	120	0.03095	0.03095	1	1	Any process that activates, maintains or increases the rate of ubiquitin ligase activity that contributes to the mitotic cell cycle	0.596815	-1.06549	PSMA6, ANAPC2, PSMB10, UBC, ANAPC11, ANAPC7, FZR1	PSMD5, PSMD12, PSMA4, PSMC6, CDC27, CDC23, PSMA1, ANAPC10, UBE2E1, PSMD10, PSMD14, PSMD6, PSMD7, PSMA3, SKP1, CCNB1
GO:0005975	carbohydrate metabolic process	315	4	1.21	419	0.03148	0.10986	1	1	The chemical reactions and pathways involving carbohydrates, any of a group of organic compounds based of the general formula Cx(H2O)y. Includes the formation of carbohydrate derivatives by the addition of a carbohydrate residue to another molecule	0.887872	-1.1166	B3GNT3, IPPK, H6PD, TGFB1, PIGQ, PC, STK40, WDR5, IGFBP5, MAN2C1, HYAL2, TKFC, INPP5E, CPT1A, BRAT1, PFKL, C1QTNF2, PYGB, ACACB, TKT, SLC25A10, SIRT6, GAA, UBC, AMDHD2, PGGHG, GLYCTK, GALK1, NAGPA, ALDH2, PMM1, SLC3A2, IDUA, DPM3, DGKQ, PFKFB4, ST6GALNAC6, PPARD, ME1, OGDH, POFUT1, NEU3, STBD1, PCK2, CHID1, B4GALT7, B3GAT3, ST3GAL5, PTH1R, NISCH, PHKA2, GAL3ST4, ISYNA1, IGFBP4, CRTC2, SESN2, BAD,…	PGM3, GPD2, UGP2, ARPP19, PPP1CC, KAT2B, AGL, HAS2, OMA1, CALM2, SIRT1, PPP1CB, FUCA2, ST6GALNAC5, GYG1, ADIPOR1, IDH3A, SLC35A1, B4GALT6, SDHAF3, COX11, SLC25A13, ABHD10, ALDH5A1, PPP1R2, CTBS, SIAE, GNPDA2, IMPAD1, BPGM, PDHB, FUT8, SERP1, RPE, ALDH1B1, B3GLCT, GK, CS, PGM2, COQ2, GALNT7, DUSP12, B3GAT2, MAN2A1, IMPA1, GPD1L, PRKAA1, UEVLD, IL6, GCLC, HEXB, B4GALT4, MYORG
GO:1904667	negative regulation of ubiquitin protein...	73	2	0.28	121	0.03174	0.03174	1	1		0.596815	-1.06549	PSMA6, ANAPC2, PSMB10, UBC, ANAPC11, ANAPC7, FZR1	PSMD5, PSMD12, PSMA4, PSMC6, CDC27, CDC23, PSMA1, ANAPC10, UBE2E1, PSMD10, PSMD14, PSMD6, PSMD7, PSMA3, CCNB1
GO:0009966	regulation of signal transduction	1598	11	6.14	1175	0.0319	0.54195	1	1	Any process that modulates the frequency, rate or extent of signal transduction	1.29768	-1.8581	HTRA1, ADAM8, CARD9, TNFRSF19, BST2, PSMA6, PIDD1, IKBKG, RHOF, PREX1, FZD8, ARAP1, STMN3, SUFU, RGS12, NPHP4, RHOBTB2, NOTCH1, HTT, IGFBP2, FGFR3, TGFB1, HMOX1, MAPK11, SZT2, CSF1, GDPD5, CTNNBIP1, PDE4A, SLC35F6, MC1R, AKR1C3, ABCA7, RGS3, ZNF703, DAPK3, CTSH, RAPGEF1, SOCS7, SPPL2B, GFI1, PALM3, GPSM1, GLIS2, CLIP3, APOE, PLXNB1, FBXL15, GAS6, CSPG4, MADD, SEMA7A, STK40, ATRIP, NEO1, IGFBP5, P…	ITGB1, ZNF675, ARRDC3, SH3BGRL, PSMD5, EEF1E1, DYRK1A, RHOQ, WDR35, TERF2IP, TOPBP1, COL3A1, BICC1, STAT1, UBE2N, NFE2L2, PHIP, C3orf58, NOV, NETO2, PDCD10, OPHN1, PDGFD, PIK3R1, TIAM2, GPRC5B, GJA1, DVL3, TAF5, ARL6IP5, FBXO8, SNX3, YWHAZ, EIF2A, ATP2C1, TMEM33, DNAJA1, PIBF1, SUMO1, MAP3K20, DNM1L, RFFL, HSPH1, EIF2AK2, PSMD12, TRIM33, MED13, PDGFRA, DEPDC7, SNX13, RYK, PSMA4, RNF111, CLOCK, RT…
GO:0007050	cell cycle arrest	183	3	0.7	122	0.03252	0.03252	1	1	A regulatory process that halts progression through the cell cycle during one of the normal phases (G1, S, G2, M)	0.862798	-1.19468	CCNK, PIDD1, TGFB1, BIN1, GAS6, CDK9, STK11, MAPK12, PLK3, LAMTOR4, PNPT1, DAB2IP, RASSF1, APBB1, UBC, HRAS, ZBTB49, MUC1, TFAP4, WDR6, PPP2R5B, PPP2R3B, FOXM1, TNKS1BP1, TBRG4, MDM4, FOXO4, RBL2, GAS2L1, HSP90AB1, PKD1, E2F1, MLST8, MYBBP1A	MTBP, CUL5, MAP3K20, NPM1, DDIAS, CNOT8, CDKN2B, PKD2, KAT2B, STRADB, PRNP, PCNA, CDKN1B, CNOT2, NOTCH2, CDKN3, MSH2, TRIAP1, CNOT1, RB1, TGFB2, RRAGB, UHMK1, CNOT4, NKX3-1, PRKAB2, CUL2, CDK6, PA2G4, CDK7, CNOT6, ATM, CASP2, CNOT10, TGFBR1, EP300, UHRF2, KHDRBS1, SETMAR, SOX4, GADD45A, PRKAA1, CNOT9, RGCC, CCNB1, RPL26
GO:0016477	cell migration	638	6	2.45	616	0.03254	0.17623	1	1	The controlled self-propelled movement of a cell from one site to a destination guided by molecular cues. Cell migration is a central process in the development and maintenance of multicellular organisms	1.19535	-1.65456	SPNS2, ADAM8, BST2, TIE1, PREX1, NOTCH1, ELMO3, TGFB1, HMOX1, LAMA2, CERS2, EFNB1, PPIL2, TSPO, CSF1, PGF, ZNF703, DAPK3, CTSH, SOCS7, CDC42BPB, APOE, PLXNB1, TRPM2, GAS6, CSPG4, SCRIB, IGFBP5, HYAL2, SPHK1, FLNA, TRPM4, SLC7A11, BRAT1, KIF14, POMGNT2, FSCN1, GPC1, HDAC5, SPECC1L, VAV2, PPM1F, DAB2IP, JUP, TYRO3, SUN2, BCAR1, ARHGAP35, SEMA4C, RPS19, PLEKHO1, SDC3, TNK2, PLXNB2, TNFSF12, WASHC1, …	ITGB1, CD58, ARPC5, COL3A1, NFE2L2, NOV, PDCD10, OPHN1, PDGFD, PIK3R1, PHLDB2, PFN2, CPNE3, RFFL, PDGFRA, RNF20, RTN4, ITGA4, PALLD, MYLK, PTPRK, PSG1, SPAG9, IQGAP1, MCC, MATN2, CLIC4, CYP1B1, GNA13, HAS2, EFNB2, RAB11A, EPHA4, IL1B, ASPM, ARF4, CD47, WNT5A, NEXN, ANLN, JAM2, SMURF2, STRAP, SRGAP2C, PROS1, YES1, AVL9, ITGA6, MET, GRB14, AGTR1, SBDS, NCK1, VCL, KRIT1, ADIPOR1, PKP2, TGFB2, SLC16A…
GO:0031145	anaphase-promoting complex-dependent cat...	74	2	0.28	123	0.03255	0.03255	1	1	The chemical reactions and pathways resulting in the breakdown of a protein or peptide by hydrolysis of its peptide bonds, initiated by the covalent attachment of ubiquitin, with ubiquitin-protein ligation catalyzed by the anaphase-promoting complex, and mediated by the proteasome	0.613809	-1.06549	PSMA6, ANAPC2, PSMB10, UBC, ANAPC11, SKP2, ANAPC7, FZR1, FBXO31	PSMD5, PSMD12, PSMA4, PSMC6, CDC27, CDC23, PSMA1, ANAPC10, UBE2E1, PSMD10, PSMD14, PSMD6, PSMD7, PTTG1, PSMA3, CCNB1
GO:0032387	negative regulation of intracellular tra...	74	2	0.28	759	0.03255	0.23949	1	1	Any process that stops, prevents, or reduces the frequency, rate or extent of the directed movement of substances within cells	1.1289	-0.901107	CRYAB, BST2, SUFU, HMOX1, SYT11, RANGAP1, GAS6, THRA, CNIH2, DAB2IP, CCDC22, NLRP3, PKD1	NOV, SNX3, PKD2, WWTR1, G3BP2, UBE2J1, PSMD10, RAP1B, INSIG1, SOX4, FBXW11, FMR1, CHP1
GO:0034101	erythrocyte homeostasis	74	2	0.28	124	0.03255	0.03255	1	1	Any process of regulating the production and elimination of erythrocytes within an organism	0.608822	-0.795374	HMOX1, ISG15, THRA, ZNF16, RPS19, P4HTM, STAT5B, HOXB6	PTBP3, SMAP1, ZFP36L1, B2M, RB1, ACVR2A, SENP1, SLC11A2, LYN, AXL, CDK6, BCL6, HSPA9, RPS24, GATA3, ATP5IF1, SMAD5
GO:0098602	single organism cell adhesion	319	4	1.23	428	0.03277	0.11302	1	1	The attachment, via cell adhesion molecules, of a cell to either another cell of the same organism, or to an underlying substrate of the same organism such as the extracellular matrix	1.03385	-1.46191	LAG3, ADAM8, PREX1, NPHP4, IGFBP2, NPHP1, TGFB1, EFNB1, AP3D1, ZNF703, PIEZO1, RAPGEF1, GAS6, SCRIB, KIFC3, ARVCF, ZBTB7B, FLNA, SLC7A11, HLX, KIF14, JUP, TYRO3, LAMA5, SRGAP2, CDSN, CEBPB, NECTIN1, CSK, ACTN4, STAT5B, MYL9, MICALL2, CD34, PKP3, ICAM5, NLRP3, BAD, STK10, FANCA, EPHA1, TNFSF9, DOCK1, ICAM3, ITGB3, PKD1, RCC2, BLOC1S4, CORO1A, MLST8	ITGB1, CD58, NOV, ZBTB1, PIK3R1, HSPH1, PDGFRA, GLMN, GPAM, MARCH7, ITGA4, SOCS5, PRKAR1A, RC3H1, DENND6A, PRNP, SERPINB8, CYP1B1, MAP3K7, HAS2, EFNB2, IL1B, CD47, WNT5A, JAM2, YES1, ZFP36L1, ITGA6, CYFIP2, NCK1, ANTXR1, NECTIN3, VCL, PKP2, MYO10, TGFB2, VAMP3, GBP1, ROCK1, NT5E, EGFR, CDC42, CITED2, DSC2, CD24, CARMIL1, CD44, NET1, NRXN3, RAB1A, LYN, ZMIZ1, AXL, DPP4, PLEKHA7, AP3B1, S100A10, GC…
GO:0002699	positive regulation of immune effector p...	75	2	0.29	1497	0.03336	1	1	1	Any process that activates or increases the frequency, rate, or extent of an immune effector process	0.834908	-1.06832	LAG3, EXOSC6, TGFB1, HMOX1, RAPGEF1, SEMA7A, HLX, RPS19, GAB2, STAT5B, FZD5, NLRP3, ATAD5	CADM1, ZBTB1, GPRC5B, SOCS5, ANKRD17, MAP3K7, PUM2, IL1B, WNT5A, PUM1, B2M, MSH6, MSH2, EXOSC3, VAMP7, SNX4, LYN, AP1G1, HSPD1, TLR4, UNG, CD46, TRAF6, STYK1, TRIM6, IL6, GATA3
GO:0090288	negative regulation of cellular response...	75	2	0.29	125	0.03336	0.03336	1	1	Any process that decreases the rate, frequency, or extent of a change in state or activity of a cell (in terms of movement, secretion, enzyme production, gene expression, etc.) as a result of a growth factor stimulus	0.851179	-0.830832	HTRA1, NOTCH1, TGFB1, FAM129B, GPC1, DAB2IP, UBC, PTPN1, HHEX, FUZ, VASN, NBL1, CASK, SMAD6, LTBP1, CD109	TRIM33, DKK1, SHISA2, WNT5A, SMURF2, STRAP, SIRT1, CTDSPL2, TOB1, SPRY2, TGFBR1, SNX25, GATA3
GO:0032516	positive regulation of phosphoprotein ph...	9	1	0.03	127	0.03405	0.03405	1	1	Any process that activates or increases the activity of a phosphoprotein phosphatase	0.0313559	0.0313559	PTPA, PDGFRB, HSP90AB1	PPP1R12A, CALM2
GO:0033631	cell-cell adhesion mediated by integrin	9	1	0.03	1498	0.03405	1	1	1	The attachment of one cell to another cell via an integrin, a heterodimeric adhesion receptor formed by the non-covalent association of particular alpha and beta subunits	-0.198728	-0.198728	PIEZO1	ITGB1, DPP4
GO:0048311	mitochondrion distribution	9	1	0.03	128	0.03405	0.03405	1	1	Any process that establishes the spatial arrangement of mitochondria between and within cells	-0.0246524	-0.0246524	CLUH, MAPT, KAT2A	DNM1L, SYNJ2BP, MSTO1
GO:0050651	dermatan sulfate proteoglycan biosynthet...	9	1	0.03	129	0.03405	0.03405	1	1	The chemical reactions and pathways resulting in the formation of dermatan sulfate proteoglycan, any glycoprotein whose glycosaminoglycan units are dermatan sulfate (chondroitin sulfate B). Dermatan sulfate is a glycosaminoglycan with repeats consisting of beta-(1,4)-linked L-iduronyl-beta-(1,3)-N-acetyl-D-galactosamine 4-sulfate units	0.0537004	0.0537004	CSPG4, B3GAT3, CHST12	VCAN, DSE
GO:0060117	auditory receptor cell development	9	1	0.03	130	0.03405	0.03405	1	1	The process whose specific outcome is the progression of an auditory receptor cell over time, from its formation to the mature structure. Cell development does not include the steps involved in committing a cell to a specific fate	-0.029319	-0.029319	SCRIB
GO:0060122	inner ear receptor stereocilium organiza...	9	1	0.03	131	0.03405	0.03405	1	1	A process that is carried out at the cellular level which results in the assembly, arrangement of constituent parts, or disassembly of a stereocilium. A stereocilium is an actin-based protrusion from the apical surface of inner ear receptor cells	0.0727227	0.0727227	SCRIB
GO:0070203	regulation of establishment of protein l...	9	1	0.03	132	0.03405	0.03405	1	1	Any process that modulates the frequency, rate or extent of the directed movement of a protein to a specific location in the telomeric region of a chromosome	-0.199049	-0.199049	WRAP53	TCP1, CCT6A
GO:0098877	neurotransmitter receptor transport to p...	9	1	0.03	133	0.03405	0.03405	1	1		-0.0253567	-0.0253567	SCRIB	RAB11A, VPS35, RAB8A
GO:1903405	protein localization to nuclear body	9	1	0.03	134	0.03405	0.03405	1	1	A process in which a protein is transported to, or maintained in, a location within a nuclear body	-0.150682	-0.150682	WRAP53	TCP1, CCT6A
GO:1904851	positive regulation of establishment of ...	9	1	0.03	135	0.03405	0.03405	1	1		-0.199049	-0.199049	WRAP53	TCP1, CCT6A
GO:1904867	protein localization to Cajal body	9	1	0.03	136	0.03405	0.03405	1	1		-0.150682	-0.150682	WRAP53	TCP1, CCT6A
GO:1990173	protein localization to nucleoplasm	9	1	0.03	137	0.03405	0.03405	1	1	A process in which a protein is transported to, or maintained in, a location within the nucleoplasm	-0.150682	-0.150682	WRAP53	TCP1, CCT6A
GO:0030260	entry into host cell	76	2	0.29	138	0.03418	0.03418	1	1	The invasion by an organism of a cell of its host organism. The host is defined as the larger of the organisms involved in a symbiotic interaction	0.688818	-1.18584	GAS6, SIVA1, HYAL2, RPSA, TYRO3, LDLR, UBC, P4HB, GRK2, WWP2, NECTIN1, CBL, SLC52A2, HSPA1B, SCARB1, ITGB3	ITGB1, KPNA3, XPR1, SNX3, WWP1, EFNB2, MET, FUCA2, ZNF639, AXL, DPP4, TRIM59, CTNND1, CD46, AC068234.1, CBLL1, TRIM8
GO:0030879	mammary gland development	76	2	0.29	139	0.03418	0.03418	1	1	The process whose specific outcome is the progression of the mammary gland over time, from its formation to the mature structure. The mammary gland is a large compound sebaceous gland that in female mammals is modified to secrete milk. Its development starts with the formation of the mammary line and ends as the mature gland cycles between nursing and weaning stages	0.769794	-0.753298	TGFB1, CSF1, ZNF703, TBX2, SCRIB, IGFBP5, PTCH1, ARHGAP35, UMPS, CEBPB, DEAF1, ETV4, STAT5B, CAD, HOXB9	RTN4, CREB1, AREG, ARHGAP5, WNT5A, OXTR, IQGAP3, GATA3
GO:0044409	entry into host	76	2	0.29	140	0.03418	0.03418	1	1	Penetration by an organism into the body, tissues, or cells of the host organism. The host is defined as the larger of the organisms involved in a symbiotic interaction	0.688818	-1.18584	GAS6, SIVA1, HYAL2, RPSA, TYRO3, LDLR, UBC, P4HB, GRK2, WWP2, NECTIN1, CBL, SLC52A2, HSPA1B, SCARB1, ITGB3	ITGB1, KPNA3, XPR1, SNX3, WWP1, EFNB2, MET, FUCA2, ZNF639, AXL, DPP4, TRIM59, CTNND1, CD46, AC068234.1, CBLL1, TRIM8
GO:0051806	entry into cell of other organism involv...	76	2	0.29	141	0.03418	0.03418	1	1	The invasion by an organism of a cell of a second organism, where the two organisms are in a symbiotic interaction	0.688818	-1.18584	GAS6, SIVA1, HYAL2, RPSA, TYRO3, LDLR, UBC, P4HB, GRK2, WWP2, NECTIN1, CBL, SLC52A2, HSPA1B, SCARB1, ITGB3	ITGB1, KPNA3, XPR1, SNX3, WWP1, EFNB2, MET, FUCA2, ZNF639, AXL, DPP4, TRIM59, CTNND1, CD46, AC068234.1, CBLL1, TRIM8
GO:0051828	entry into other organism involved in sy...	76	2	0.29	142	0.03418	0.03418	1	1	Penetration by an organism into the body, tissues, or cells of a second organism, where the two organisms are in a symbiotic interaction	0.688818	-1.18584	GAS6, SIVA1, HYAL2, RPSA, TYRO3, LDLR, UBC, P4HB, GRK2, WWP2, NECTIN1, CBL, SLC52A2, HSPA1B, SCARB1, ITGB3	ITGB1, KPNA3, XPR1, SNX3, WWP1, EFNB2, MET, FUCA2, ZNF639, AXL, DPP4, TRIM59, CTNND1, CD46, AC068234.1, CBLL1, TRIM8
GO:0007052	mitotic spindle organization	77	2	0.3	773	0.03501	0.24804	1	1	A process that is carried out at the cellular level which results in the assembly, arrangement of constituent parts, or disassembly of the microtubule spindle during a mitotic cell cycle	0.567988	-0.874614	FLNA, PTPA, SUN2, MAP4, WDR62, AURKC, HSPA1B, TUBGCP6, WRAP73, PKD1	CHMP2B, PIBF1, RAB11A, SPC25, TTK, SBDS, PRC1, INTS13, VPS4B, KIF11, ABRAXAS2, NDC80, CCSAP, NA, CLASP2, KIF2A, RACGAP1, STMN1, CCNB1
GO:0030010	establishment of cell polarity	77	2	0.3	143	0.03501	0.03501	1	1	The specification and formation of anisotropic intracellular organization or cell growth patterns	0.668974	-0.717822	HTT, SCRIB, STK11, FBF1, FSCN1, MAP4, SIPA1L3, AMOTL1, MPP5, PKD1	RAB10, WNT5A, KRIT1, SPDL1, RAP1B, ROCK1, ZW10, NDC80, SPRY2, PRKCI, NDE1, PTK2, ARFGEF1, FGF13, RUFY3, GATA3
GO:1902850	microtubule cytoskeleton organization in...	77	2	0.3	774	0.03501	0.24804	1	1	Any microtubule cytoskeleton organization that is involved in mitosis	0.567988	-0.874614	FLNA, PTPA, SUN2, MAP4, WDR62, AURKC, HSPA1B, TUBGCP6, WRAP73, PKD1	CHMP2B, PIBF1, RAB11A, SPC25, TTK, SBDS, PRC1, INTS13, VPS4B, KIF11, ABRAXAS2, NDC80, CCSAP, NA, CLASP2, KIF2A, RACGAP1, STMN1, CCNB1
GO:1904668	positive regulation of ubiquitin protein...	77	2	0.3	144	0.03501	0.03501	1	1		0.596815	-1.06549	PSMA6, ANAPC2, PSMB10, UBC, ANAPC11, ANAPC7, FZR1	PSMD5, PSMD12, PSMA4, PSMC6, CDC27, CDC23, PSMA1, ANAPC10, UBE2E1, PSMD10, RAB1A, PSMD14, PSMD6, PSMD7, PSMA3, SKP1, CCNB1
GO:2000278	regulation of DNA biosynthetic process	77	2	0.3	145	0.03501	0.03501	1	1	Any process that modulates the frequency, rate or extent of DNA biosynthetic process	0.544338	-1.07894	WRAP53, PIF1, FAM129B, PNKP, PRKD2, PDGFRB, HSP90AB1, SH2B1	PTGES3, POT1, GJA1, HSP90AA1, TCP1, RFC4, TNKS2, DNAJC2, HNRNPC, FBXO4, CCT6A, HNRNPD, TERF2, ATM, NEK7, KLF4, KCNK2, RGCC, XRCC5
GO:0098609	cell-cell adhesion	327	4	1.26	445	0.03543	0.11944	1	1	The attachment of one cell to another cell via adhesion molecules	1.01458	-1.5257	LAG3, ADAM8, NPHP4, IGFBP2, NPHP1, TGFB1, EFNB1, AP3D1, SDK1, ZNF703, PIEZO1, RAPGEF1, GAS6, SCRIB, KIFC3, ARVCF, ZBTB7B, FLNA, SLC7A11, HLX, SCARF2, JUP, TYRO3, PLXNB2, CLDN22, CDSN, CEBPB, CELSR3, NECTIN1, CSK, CLSTN1, CLDN15, STAT5B, MYL9, CD34, PKP3, ICAM5, NLRP3, BAD, STK10, FANCA, TNFSF9, ICAM3, ITGB3, KIRREL3, PKD1, BLOC1S4, CORO1A, MLST8	ITGB1, CD58, CADM1, NOV, ZBTB1, PIK3R1, ATP2C1, HSPH1, FAT3, PDGFRA, GLMN, RAB10, GPAM, MARCH7, ITGA4, SOCS5, PRKAR1A, RC3H1, DENND6A, PRNP, SERPINB8, CYP1B1, MAP3K7, CLDN12, HAS2, EFNB2, IL1B, CD47, WNT5A, JAM2, YES1, ZFP36L1, ITGA6, CYFIP2, NCK1, NECTIN3, VCL, PKP2, MYO10, TGFB2, PDLIM5, ROCK1, NT5E, EGFR, CDC42, CITED2, DSC2, CD24, CD44, NRXN3, LYN, ZMIZ1, DPP4, PLEKHA7, AP3B1, CLDN11, GCNT1, …
GO:0048523	negative regulation of cellular process	2511	15	9.64	360	0.03576	0.09158	1	1	Any process that stops, prevents, or reduces the frequency, rate or extent of a cellular process, any of those that are carried out at the cellular level, but are not necessarily restricted to a single cell. For example, cell communication occurs among more than one cell, but occurs at the cellular level	1.81046	-1.968	CRYAB, HTRA1, IGFBP7, OSGIN1, SPP1, WDR81, APLP1, LAG3, ADAM8, BST2, LMTK3, TIE1, LRP8, CCNK, PSMA6, ADAMTS1, PIDD1, PRKAR1B, IKBKG, WFIKKN1, KLF16, PREX1, FZD8, ARAP1, VILL, STMN3, RTEL1, SUFU, RGS12, NPHP4, HES6, NOTCH1, HTT, IGFBP2, TGFB1, HMOX1, MAPK11, CERS2, TSPO, SZT2, NEIL1, SBNO2, GDPD5, ISG15, LZTS1, ZNF219, CTNNBIP1, SLC35F6, AKR1C3, ABCA7, RGS3, ZNF703, BIN1, DAPK3, ZGLP1, CTSH, CBARP…	ITGB1, ZNF675, FAM220A, UBE2D3, BNIP3L, HIGD1A, PSMD5, CAMK2N1, EEF1E1, BCHE, RNASEH2B, MTBP, PPT1, DYRK1A, RHOQ, UCHL5, CUL5, WDR35, EIF3E, TERF2IP, TOPBP1, THRB, IREB2, COL3A1, BICC1, STAT1, NFE2L2, POT1, PHIP, IFT74, ZBTB33, PTBP3, HAT1, BAZ2A, NOV, PDCD10, ZBTB1, OPHN1, FMN2, PIK3R1, CAPZA1, ZNF655, PHLDB2, GJA1, DVL3, LRRC17, KDM5A, ZNF224, PFN2, SRP9, DYNC1LI1, SNX3, YWHAZ, NIFK, DNAJA1, PI…
GO:0000187	activation of MAPK activity	79	2	0.3	146	0.03669	0.03669	1	1	The initiation of the activity of the inactive enzyme MAP kinase (MAPK)	0.844507	-0.997333	ADAM8, IKBKG, MAPK11, CSPG4, MADD, S1PR2, C1QTNF2, MAP2K3, DAB2IP, AXIN1, UBC, AKAP13, PTPN1, MAPK8IP3, DBNL, PDE6G, MAP3K11, MUL1, AVPI1, MAP3K10, MAP3K6, MAPKAPK2	UBE2N, MAP3K20, MAP4K5, SPAG9, MAP3K7, MAP2K4, IL1B, WNT5A, TAB2, HACD3, FGF2, IQGAP3, TLR4, TRAF6, MAP4K2, ERCC6, PRKAA1, LPAR1
GO:0051444	negative regulation of ubiquitin-protein...	79	2	0.3	147	0.03669	0.03669	1	1	Any process that stops, prevents, or reduces the frequency, rate or extent of ubiquitin transferase activity	0.596815	-1.06549	PSMA6, ANAPC2, PSMB10, UBC, ANAPC11, ANAPC7, FZR1	PSMD5, PSMD12, PSMA4, PSMC6, CDC27, CDC23, PSMA1, ANAPC10, UBE2E1, PSMD10, PSMD14, PSMD6, PSMD7, PSMA3, CCNB1
GO:0050673	epithelial cell proliferation	193	3	0.74	148	0.03721	0.03721	1	1	The multiplication or reproduction of epithelial cells, resulting in the expansion of a cell population. Epithelial cells make up the epithelium, the covering of internal and external surfaces of the body, including the lining of vessels and other small cavities. It consists of cells joined by small amounts of cementing substances	0.978051	-1.23331	HTRA1, NOTCH1, TGFB1, HMOX1, PGF, ZNF703, APOE, IGFBP5, MAGED1, STK11, PTCH1, CTSV, DAB2IP, EGFL7, SIRT6, TNFSF12, HRAS, CEBPB, PPARD, DEAF1, IFT122, ETV4, PRKD2, CASK, CD34, IGFBP4, WDR13, BAD, ANG, SCARB1, ITGB3, CD109, FMC1	STAT1, IFT74, NOV, PDCD10, GJA1, RTN4, CDKN2B, PTPRK, MCC, AREG, FBXW7, HAS2, EFNB2, WNT5A, STRAP, ZFP36L1, CDKN1B, SIRT1, ATF2, KRIT1, PEX2, RB1, TGFB2, FGF2, ACVR2A, EGFR, CDC42, NKX3-1, CDC73, CDK6, SYNJ2BP, IQGAP3, LAMB1, NCSTN, PRKD1, SEMA5A, COL8A1, TNFAIP3, AC068234.1, TGFBR1, RIDA, SERPINF1, IL6, GATA3, LOXL2, BTBD10, ERRFI1, RGCC, ATP5IF1
GO:2000060	positive regulation of protein ubiquitin...	80	2	0.31	150	0.03754	0.03754	1	1	Any process that activates or increases the frequency, rate or extent of protein ubiquitination involved in ubiquitin-dependent protein catabolic process	0.648368	-1.0849	PSMA6, ANAPC2, PSMB10, AXIN1, UBC, CCDC22, ANAPC11, ANAPC7, FZR1	PSMD5, PSMD12, PSMA4, PSMC6, CDC27, CDC23, FBXW7, PSMA1, ANAPC10, UBE2E1, PSMD10, PSMD14, PSMD6, PSMD7, RNF139, PTK2, PSMA3, SKP1, CCNB1
GO:0002686	negative regulation of leukocyte migrati...	10	1	0.04	151	0.03777	0.03777	1	1	Any process that stops, prevents, or reduces the frequency, rate, or extent of leukocyte migration	0.0729608	0.0729608	HMOX1, WASL, BCR, NBL1	NOV
GO:0008105	asymmetric protein localization	10	1	0.04	152	0.03777	0.03777	1	1	Any process in which a protein is transported to, or maintained in, a specific location such that it is distributed asymmetrically	-0.0461344	-0.0461344	SCRIB, MPP5	RAB10, ARF4
GO:0010922	positive regulation of phosphatase activ...	10	1	0.04	153	0.03777	0.03777	1	1	Any process that increases the rate or frequency of phosphatase activity. Phosphatases catalyze the hydrolysis of phosphoric monoesters, releasing inorganic phosphate	0.0195519	0.0195519	PTPA, PDGFRB, HSP90AB1	PPP1R12A, CALM2
GO:0031125	rRNA 3'-end processing	10	1	0.04	1499	0.03777	1	1	1	Any process involved in forming the mature 3' end of an rRNA molecule	0.0836047	0.0836047	EXOSC6, RPSA, RPS21, EXOSC4	ERI2, EXOSC3
GO:0034110	regulation of homotypic cell-cell adhesi...	10	1	0.04	154	0.03777	0.03777	1	1	Any process that modulates the frequency, rate, or extent of homotypic cell-cell adhesion	-0.00986969	-0.00986969	ZNF703	LYN
GO:0043619	regulation of transcription from RNA pol...	10	1	0.04	155	0.03777	0.03777	1	1	Modulation of the frequency, rate or extent of transcription from an RNA polymerase II promoter as a result of a stimulus indicating the organism is under oxidative stress, a state often resulting from exposure to high levels of reactive oxygen species, e.g. superoxide anions, hydrogen peroxide (H2O2), and hydroxyl radicals	-0.107261	-0.107261	HMOX1, SESN2	NFE2L2, SIN3A
GO:0050655	dermatan sulfate proteoglycan metabolic ...	10	1	0.04	156	0.03777	0.03777	1	1	The chemical reactions and pathways involving dermatan sulfate proteoglycan, any glycoprotein whose glycosaminoglycan units are dermatan sulfate (chondroitin sulfate B). Dermatan sulfate is a glycosaminoglycan with repeats consisting of beta-(1,4)-linked L-iduronyl-beta-(1,3)-N-acetyl-D-galactosamine 4-sulfate units	0.103691	0.103691	CSPG4, IDUA, B3GAT3, CHST12	VCAN, DSE
GO:0051187	cofactor catabolic process	10	1	0.04	1500	0.03777	1	1	1	The chemical reactions and pathways resulting in the breakdown of a cofactor, a substance that is required for the activity of an enzyme or other protein	0.196603	0.196603	HMOX1
GO:0061162	establishment of monopolar cell polarity	10	1	0.04	157	0.03777	0.03777	1	1	The specification and formation of monopolar intracellular organization or cell growth patterns. Monopolar cell organization is directional organization along an axis	0.00567794	0.00567794	SCRIB, FSCN1	WNT5A, PRKCI
GO:0061339	establishment or maintenance of monopola...	10	1	0.04	158	0.03777	0.03777	1	1	Any cellular process that results in the specification, formation or maintenance of monopolar intracellular organization or cell growth patterns. Monopolar cell organization is directional organization along an axis	0.00567794	0.00567794	SCRIB, FSCN1	WNT5A, PRKCI
GO:0070202	regulation of establishment of protein l...	10	1	0.04	159	0.03777	0.03777	1	1	Any process that modulates the frequency, rate or extent of the directed movement of a protein to a specific location on a chromosome	-0.163918	-0.163918	WRAP53	TCP1, CCT6A
GO:1902855	regulation of non-motile cilium assembly	10	1	0.04	1501	0.03777	1	1	1	Any process that modulates the frequency, rate or extent of nonmotile primary cilium assembly	0.0884122	0.0884122	SEPT9, MAP4, CEP135, WRAP73	SEPT7, DYNLL1
GO:0043405	regulation of MAP kinase activity	195	3	0.75	160	0.03819	0.03819	1	1	Any process that modulates the frequency, rate or extent of MAP kinase activity	0.948416	-1.37697	ADAM8, IKBKG, FZD8, TGFB1, MAPK11, RGS3, RAPGEF1, APOE, CSPG4, MADD, HYAL2, MAGED1, DUSP8, S1PR2, C1QTNF2, MAP2K3, DAB2IP, AXIN1, UBC, AKAP13, PTPN1, HRAS, MAPK8IP3, CSK, DBNL, PDE6G, MAP3K11, FZD5, TIAM1, MUL1, PDGFRB, SMPD1, AVPI1, MAP3K10, MAP3K6, MAPKAPK2	ZNF675, UBE2N, PDCD10, PDGFD, DVL3, DNAJA1, MAP3K20, EIF2AK2, MAP3K1, MAP4K5, SPAG9, IQGAP1, NRK, MAP4K3, MAP3K7, MAP2K4, EPHA4, IL1B, WNT5A, TAOK3, TAB2, HACD3, RGS2, MBIP, FGF2, EGFR, MAP3K13, CD24, LYN, SPRED2, SPRY2, IQGAP3, AIDA, TLR4, DUSP3, TRAF6, MAP4K2, TGFBR1, ERCC6, GADD45A, PRKAA1, PDGFC, LPAR1
GO:0007173	epidermal growth factor receptor signali...	81	2	0.31	1502	0.0384	1	1	1	A series of molecular signals initiated by binding of a ligand to the tyrosine kinase receptor EGFR (ERBB1) on the surface of a cell. The pathway ends with regulation of a downstream cellular process, e.g. transcription	0.697389	-0.916372	ARAP1, TGFB1, DGKD, DAB2IP, BCAR1, UBC, HRAS, RASSF2, CSK, CBL, PDE6G, SOCS4, MVB12A, PTPN3, RHBDF2, EPN1	PIK3R1, SOCS5, IQGAP1, AREG, FBXW7, ARF4, PTPN12, RAB7A, AFAP1L2, EGFR, CDC42, SPRY2, SH3KBP1, PTK2, STYK1, PIK3C2A, EPS8, ERRFI1
GO:0051092	positive regulation of NF-kappaB transcr...	82	2	0.31	162	0.03927	0.03927	1	1	Any process that activates or increases the frequency, rate or extent of activity of the transcription factor NF-kappaB	0.920226	-1.1375	ADAM8, PSMA6, PIDD1, IKBKG, TGFB1, SPHK1, TICAM1, TRAPPC9, UBC, TRADD, AMH, PRKD2, HSPA1B, NLRP3	TERF2IP, UBE2N, EIF2AK2, NPM1, CLOCK, TRIM13, MTDH, MAP3K7, IL1B, WNT5A, TAB2, MAP3K13, TRIM37, PRKD1, TLR4, PRKCI, TRAF6, TRIM52, PRDX3, TRIM8
GO:0051606	detection of stimulus	82	2	0.31	163	0.03927	0.03927	1	1	The series of events in which a stimulus is received by a cell or organism and converted into a molecular signal	0.582912	-1.02186	PIEZO1, PITPNM1, JUP, UBC, PNKP, GNA11, PDE6G, MRPS26, NLRP3, POLD1, POLD4, SCARB1, ASIC3, PKD1	CADM1, DNAJA1, PKD2, POLD3, PCNA, LY96, COL11A1, RFC4, USP1, CCDC66, OPN3, CALM2, MRPS9, RDH11, SYT1, DTL, METAP2, RAD18, HSPD1, TLR4, FNTA, TRPV1, SOX4, UBE2B, DENND5B, RPA2
GO:1902533	positive regulation of intracellular sig...	498	5	1.91	164	0.03984	0.03984	1	1	Any process that activates or increases the frequency, rate or extent of intracellular signal transduction	1.12781	-1.45143	ADAM8, CARD9, TNFRSF19, BST2, IKBKG, FZD8, NOTCH1, HTT, FGFR3, TGFB1, HMOX1, MAPK11, CSF1, MC1R, AKR1C3, ABCA7, RAPGEF1, PLXNB1, GAS6, CSPG4, MADD, SEMA7A, IGFBP5, SPHK1, MAGED1, SPPL3, FLNA, S100A4, TICAM1, JPH2, S1PR2, LAMTOR4, C1QTNF2, MAP2K3, DAB2IP, AXIN1, SEMA4C, UBC, TELO2, CARD10, AKAP13, MIB2, PTPN1, GPR17, HRAS, HSF1, CCDC22, WDR24, MAPK8IP3, RASSF2, TRADD, IRF3, CSK, BCL2L1, ACTN4, DBN…	EEF1E1, TERF2IP, COL3A1, UBE2N, PDCD10, PDGFD, GPRC5B, GJA1, DVL3, ARL6IP5, ATP2C1, PIBF1, MAP3K20, DNM1L, EIF2AK2, PDGFRA, RYK, RTN4, UBE3A, MAP3K1, TRIM13, MTDH, PKD2, HPSE, MAP4K5, SPAG9, RC3H1, IQGAP1, NRK, STK3, GDF6, MAP4K3, FBXW7, GOLT1B, ANKRD17, CYP1B1, MAP3K7, PRKRA, PUM2, MAP2K4, EPHA4, IL1B, BECN1, WNT5A, C18orf32, TAOK3, PUM1, TAB2, FKBP1A, COPS8, SOS2, CALM2, SIRT1, SLC20A1, NOTCH2,…
GO:1904666	regulation of ubiquitin protein ligase a...	83	2	0.32	165	0.04014	0.04014	1	1		0.596815	-1.06549	PSMA6, ANAPC2, PSMB10, UBC, ANAPC11, ANAPC7, FZR1	PSMD5, PSMD12, PSMA4, PSMC6, CDC27, CDC23, PSMA1, ANAPC10, UBE2E1, PSMD10, RAB1A, PSMD14, PSMD6, PSMD7, PSMA3, SKP1, CCNB1
GO:0072594	establishment of protein localization to...	500	5	1.92	422	0.04043	0.11258	1	1	The directed movement of a protein to a specific location on or in an organelle. Encompasses establishment of localization in the membrane or lumen of a membrane-bounded organelle	0.915642	-1.53167	IPO4, SUFU, TSPAN10, TGFB1, TSPO, WRAP53, AP3D1, AKR1C3, PEX6, GAS6, SCRIB, SREBF1, HYAL2, SPHK1, SPPL3, FLNA, RPL10, THRA, RPSA, DNLZ, TIMM44, MAPT, TSPAN17, PEX16, DAB2IP, JUP, ZDHHC8, RPS19, STIMATE, BAP1, CCDC22, NAGPA, VTI1A, PMM1, RPS28, RPL31, TOMM5, IFT122, SEC61A1, PPP3R1, RPLP2, KPNA6, UBE2J2, RPS10, MICALL2, FZD5, SELENOI, MTX1, BID, TNPO2, NLRP3, BAD, PMPCA, KAT2A, RPS29, RPS21, LEPRO…	UBE2D3, BNIP3L, KPNA3, PEX3, POT1, NOV, PIK3R1, SRP19, HSP90AA1, PEX12, SRP9, YWHAZ, DNAJA1, UGCG, TIMM17A, HSPH1, TOMM20, RPL39, VPS36, RPL15, ZFYVE16, RAB10, NPEPPS, WDR75, NUP35, RAB6A, TRNT1, TNPO1, PKD2, WWTR1, FBXW7, G3BP2, CSNK2A2, NUP54, TCP1, KPNA4, RANBP6, RPL36A, RAB11A, IL1B, YWHAH, RPS3A, RPL9, DYNLL2, CALM2, SIRT1, TIMM9, MFF, HNMT, SRP54, NCOA4, PSMD10, SRP14, SEC63, RAB7A, PEX2, V…
GO:0045892	negative regulation of transcription, DN...	673	6	2.58	166	0.04075	0.04075	1	1	Any process that stops, prevents, or reduces the frequency, rate or extent of cellular DNA-templated transcription	0.99427	-1.66464	LRP8, KLF16, FZD8, SUFU, HES6, NOTCH1, TGFB1, SBNO2, ZNF219, CTNNBIP1, ZNF703, ZGLP1, BAHD1, TBX2, GFI1, GLIS2, HIC2, GAS6, SCX, SREBF1, MAGED1, FLNA, RPL10, SCMH1, THRA, PITX1, PTCH1, ZKSCAN3, USP3, FAM129B, CBX6, CCDC85B, MBD3, PLK3, GON4L, NR1H2, HDAC5, KLF12, PPM1F, DAB2IP, NELFB, AXIN1, ARHGAP35, ZHX2, MXD3, APBB1, SIRT6, UBC, KCNIP3, RECQL5, KMT2D, HINFP, CIC, HSF1, TNRC18, CEBPB, CBFA2T2, …	ZNF675, FAM220A, UBE2D3, THRB, STAT1, ZBTB33, HAT1, BAZ2A, ZBTB1, KDM5A, ZNF224, SUMO1, EED, RARB, BPTF, TRIM33, TBL1XR1, CGGBP1, CLOCK, RBPJ, UBA3, CREB1, HIST1H2AC, ZMYND11, PTPRK, MTDH, WWP1, CBX3, WWTR1, EPC1, UBP1, NFIL3, ZNF217, DKK1, MTERF3, BASP1, WNT5A, ZNF93, IRF2, CHCHD3, GLIS3, SMURF2, SIM2, CNBP, SAP30, STRAP, BTAF1, TRIM24, CDKN1B, SIRT1, GMNN, CNOT2, NFE2L3, SUZ12, URI1, ZNF639, SI…
GO:0071156	regulation of cell cycle arrest	84	2	0.32	167	0.04102	0.04102	1	1	Any process that modulates the rate, frequency, or extent of cell cycle arrest, the process in which the cell cycle is halted during one of the normal phases	0.810968	-0.852794	CCNK, PIDD1, TGFB1, BIN1, CDK9, PLK3, DAB2IP, UBC, MUC1, TFAP4, PPP2R5B, FOXM1, TNKS1BP1, MDM4, FOXO4, RBL2, HSP90AB1, E2F1, MYBBP1A	NPM1, CNOT8, PKD2, PCNA, CDKN1B, CNOT2, TRIAP1, CNOT1, CNOT4, CNOT6, ATM, CASP2, CNOT10, EP300, UHRF2, SETMAR, SOX4, GADD45A, CNOT9, RGCC, CCNB1, RPL26
GO:2000134	negative regulation of G1/S transition o...	84	2	0.32	168	0.04102	0.04102	1	1	Any cell cycle regulatory process that prevents the commitment of a cell from G1 to S phase of the mitotic cell cycle	0.566749	-0.975217	PIDD1, PLK3, UBC, MUC1, TNKS1BP1, MDM4, RBL2, FBXO31, E2F1	ZNF655, NPM1, CNOT8, CDKN2B, PKD2, PCNA, CDKN1B, CNOT2, TRIAP1, CNOT1, RB1, CNOT4, CDC73, JADE1, CNOT6, RFWD3, ATM, CASP2, CNOT10, EP300, SOX4, GADD45A, RPA2, CNOT9, RGCC, CCNB1, RPL26
GO:0031347	regulation of defense response	343	4	1.32	488	0.04112	0.13271	1	1	Any process that modulates the frequency, rate or extent of a defense response	1.19053	-1.53001	HTRA1, LAG3, ADAM8, CARD9, PSMA6, IKBKG, TGFB1, SBNO2, GFI1, SYT11, APOE, SEMA7A, HYAL2, PSMB10, CDK19, TICAM1, TKFC, AP1B1, NR1H2, DAB2IP, TYRO3, RPS19, LDLR, UBC, PTPRS, XIAP, UNC93B1, PTPN1, GPR17, HRAS, BCR, BAP1, RHBDD3, TARBP2, MUC1, RNF216, MAPKBP1, IRF3, SLC7A2, CACTIN, IFNGR2, PPARD, RELB, AP1M1, UCN, TNFRSF1A, CHID1, LRSAM1, STAT5B, F12, IL17RC, IL17RA, HSPA1B, NLRP3, IRF7, MUL1, FANCA,…	UBE2D3, PSMD5, ERAP1, CADM1, STAT1, UBE2N, NOV, TBC1D23, GPRC5B, UBE2D2, GJA1, SUMO1, EIF2AK2, PSMD12, AP1S2, PSMA4, CLOCK, PSMC6, MAP3K1, PRKACB, SOCS5, ELMOD2, PSMA1, LY96, ANKRD17, MAP3K7, PUM2, IL1B, CD47, WNT5A, PUM1, TAB2, PROS1, B2M, WDFY1, AGTR1, SIN3A, BIRC2, PSMD10, VAMP7, SNX4, JAK1, TBK1, NT5E, EGFR, IFNGR1, LYN, AP1G1, ISL1, TSPAN6, PSMD14, PSMD6, PSMD7, HSPD1, LSM14A, TLR4, BCL6, CD…
GO:0031401	positive regulation of protein modificat...	675	6	2.59	169	0.04125	0.04125	1	1	Any process that activates or increases the frequency, rate or extent of the covalent alteration of one or more amino acid residues within a protein	1.1838	-1.56748	ADAM8, CARD9, TNFRSF19, LRP8, CCNK, PSMA6, PRKAR1B, IKBKG, FZD8, FGFR3, TGFB1, MAPK11, CSF1, CDK20, ABCA7, RAPGEF1, CLIP3, ANAPC2, GAS6, CSPG4, MADD, SEMA7A, CDK9, SREBF1, TOLLIP, SPHK1, MAGED1, SPPL3, PSMB10, PTPA, STK11, TICAM1, BRAT1, S1PR2, KIF14, C1QTNF2, MAP2K3, DAB2IP, AXIN1, CAMKK1, SEMA4C, RAMP1, UBC, TELO2, TNK2, CARD10, AKAP13, XIAP, DVL1, AMER1, PTPN1, HRAS, HSF1, CCDC22, MAPK8IP3, SY…	ARRDC3, PSMD5, DCUN1D4, DYRK1A, TERF2IP, UBE2N, PDCD10, PDGFD, GPRC5B, DVL3, ARL6IP5, PFN2, PIBF1, MNAT1, ADNP, MAP3K20, EED, HSPH1, EIF2AK2, PSMD12, DCUN1D5, FAM129A, PDGFRA, RYK, PSMA4, RNF20, RNF111, PSMC6, PPP2R3C, UBE3A, MAP3K1, PRKACB, CDC27, TOPORS, CDC23, PKD2, MAP4K5, PRKAR1A, SPAG9, STRADB, PRNP, IQGAP1, NRK, STK3, GDF6, MAP4K3, AREG, FBXW7, PSMA1, CCNH, MAP3K7, RWDD3, MAP2K4, PPP1R12A,…
GO:0002701	negative regulation of production of mol...	11	1	0.04	1503	0.04147	1	1	1	Any process that stops, prevents, or reduces the frequency, rate, or extent of the production of molecular mediator of immune response	0.188954	-0.00954811	BST2, TGFB1, HMOX1	TGFB2, BCL6, THOC1
GO:0032515	negative regulation of phosphoprotein ph...	11	1	0.04	170	0.04147	0.04147	1	1	Any process that stops or reduces the activity of a phosphoprotein phosphatase	-0.0244667	-0.184214	PTPA, CRY2	FKBP1A, ROCK1, TIPRL
GO:0033622	integrin activation	11	1	0.04	1504	0.04147	1	1	1	The aggregation, arrangement and bonding together of an integrin, a heterodimeric adhesion receptor formed by the non-covalent association of particular alpha and beta subunits, that lead to the increased affinity of the integrin for its extracellular ligands	0.25629	0.149482	PIEZO1, KIF14, COL16A1
GO:0045730	respiratory burst	11	1	0.04	1505	0.04147	1	1	1	A phase of elevated metabolic activity, during which oxygen consumption increases; this leads to the production, by an NADH dependent system, of hydrogen peroxide (H2O2), superoxide anions and hydroxyl radicals	0.291982	0.0937019	NOXA1, RPS19, BCR, PIK3CD, NCF2	CD24
GO:0046710	GDP metabolic process	11	1	0.04	171	0.04147	0.04147	1	1	The chemical reactions and pathways involving GDP, guanosine 5'-diphosphate	0.279783	0.169345	SCRIB, NUDT18, DLG3, CASK
GO:0048643	positive regulation of skeletal muscle t...	11	1	0.04	172	0.04147	0.04147	1	1	Any process that activates, maintains or increases the rate of skeletal muscle tissue development	0.0786813	-0.0388406	FAM129B, GPC1	PRKAA1, RPS6KB1
GO:0060561	apoptotic process involved in morphogene...	11	1	0.04	173	0.04147	0.04147	1	1	Any apoptotic process that contributes to the shaping of an anatomical structure	0.321754	0.1535	NOTCH1, SCRIB, FZD5, BAK1	TGFB2
GO:0090136	epithelial cell-cell adhesion	11	1	0.04	174	0.04147	0.04147	1	1	The attachment of an epithelial cell to another epithelial cell via adhesion molecules	-0.19312	-0.415617	KIFC3, JUP	NOV, SERPINB8, CYP1B1, VCL, CDC42, PLEKHA7
GO:0090190	positive regulation of branching involve...	11	1	0.04	175	0.04147	0.04147	1	1	Any process that increases the rate, frequency or extent of branching involved in ureteric bud morphogenesis, the process in which the branching structure of the ureteric bud is generated and organized. The ureteric bud is an epithelial tube that grows out from the metanephric duct. The bud elongates and branches to give rise to the ureter and kidney collecting tubules	0.0743977	-0.0584017	TGFB1, MAGED1
GO:0099637	neurotransmitter receptor transport	11	1	0.04	1506	0.04147	1	1	1		0.184478	0.00573484	AP3D1, SCRIB	RAB11A, VPS35, RAB8A
GO:1902043	positive regulation of extrinsic apoptot...	11	1	0.04	176	0.04147	0.04147	1	1	Any process that activates or increases the frequency, rate or extent of extrinsic apoptotic signaling pathway via death domain receptors	0.0346348	-0.178248	PIDD1	STK3, STK4
GO:1904816	positive regulation of protein localizat...	11	1	0.04	177	0.04147	0.04147	1	1		-0.125278	-0.308627	WRAP53	TCP1, CCT6A, GNL3
GO:0044773	mitotic DNA damage checkpoint	85	2	0.33	178	0.04191	0.04191	1	1	A mitotic cell cycle checkpoint that detects and negatively regulates progression through the cell cycle in response to DNA damage	0.588053	-0.972681	PIDD1, PLK3, UBC, MUC1, HUS1, TNKS1BP1, MDM4, FOXO4, RBL2, FBXO31, E2F1	TOPBP1, NPM1, CNOT8, SYF2, PCNA, TAOK3, CDKN1B, CNOT2, ATF2, MSH2, TRIAP1, CNOT1, CNOT4, TIPIN, CNOT6, RFWD3, ATM, CASP2, CNOT10, EP300, SOX4, GADD45A, RPA2, CNOT9, RGCC, CCNB1, RPL26
GO:1902807	negative regulation of cell cycle G1/S p...	85	2	0.33	179	0.04191	0.04191	1	1	Any process that stops, prevents or reduces the frequency, rate or extent of cell cycle G1/S phase transition	0.566749	-0.975217	PIDD1, PLK3, UBC, MUC1, TNKS1BP1, MDM4, RBL2, FBXO31, E2F1	ZNF655, NPM1, CNOT8, CDKN2B, PKD2, PCNA, CDKN1B, CNOT2, TRIAP1, CNOT1, RB1, CNOT4, CDC73, JADE1, CNOT6, RFWD3, ATM, CASP2, CNOT10, EP300, SOX4, GADD45A, RPA2, CNOT9, RGCC, CCNB1, RPL26
GO:0050789	regulation of biological process	5679	27	21.81	1048	0.04241	0.43069	1	1	Any process that modulates the frequency, rate or extent of a biological process. Biological processes are regulated by many means; examples include the control of gene expression, protein modification or interaction with a protein or substrate molecule	1.94143	-2.16464	CRYAB, SPNS2, HTRA1, IGFBP7, OSGIN1, SPP1, TMX1, ZNF512B, TSPAN9, WDR81, APLP1, ADAM11, LAG3, TMEM8B, NOXA1, ADAM8, CARD9, TMEM65, TNFRSF19, BST2, AKAP10, ZNF628, LMTK3, AL928654.3, TIE1, LRP8, CCNK, PSMA6, ZBTB34, ADAMTS1, ZNF341, PIDD1, PRKAR1B, IKBKG, WFIKKN1, RHOF, KLF16, PREX1, BRF1, EGLN2, FZD8, PPFIA3, CRTC1, ARAP1, ITGB4, VILL, ZBTB8A, STMN3, RTEL1, NEURL1B, SUFU, RGS12, NPHP4, KLF6, ZNF2…	ITGB1, ZNF675, FAM220A, ZNF138, CENPQ, KLF3, CCNG1, GEM, CD58, ARRDC3, UBE2D3, ZNF181, SH3BGRL, BNIP3L, HIGD1A, WIPF1, ARPC5, SNRK, PSMD5, ZNF441, DCUN1D4, CAMK2N1, EEF1E1, ITGB3BP, CETN2, PLPP5, BCHE, ZNF83, RNASEH2B, MTBP, PPT1, DYRK1A, PTGES3, DRAM2, RHOQ, UCHL5, CUL5, WDR35, EIF3E, KPNA3, UTRN, TERF2IP, TOPBP1, ZFP69B, THRB, IREB2, COL3A1, BICC1, ERAP1, CADM1, STAT1, UBE2N, NFE2L2, XPR1, ANKR…
GO:0065007	biological regulation	5985	28	22.99	1304	0.0437	0.68637	1	1	Any process that modulates a measurable attribute of any biological process, quality or function	1.94143	-2.16464	CRYAB, SPNS2, HTRA1, IGFBP7, OSGIN1, SPP1, TMX1, ZNF512B, TSPAN9, WDR81, APLP1, ADAM11, LAG3, TMEM8B, NOXA1, ADAM8, CARD9, TMEM65, TNFRSF19, BST2, AKAP10, ZNF628, LMTK3, AL928654.3, TIE1, LRP8, CCNK, PSMA6, ZBTB34, ADAMTS1, ZNF341, PIDD1, PRKAR1B, IKBKG, WFIKKN1, RHOF, KLF16, PREX1, BRF1, EGLN2, FZD8, PPFIA3, CRTC1, SLC9B1, ANKRD11, ARAP1, ITGB4, VILL, ZBTB8A, STMN3, RTEL1, NEURL1B, SUFU, RGS12, …	ITGB1, ZNF675, FAM220A, ZNF138, CENPQ, KLF3, CCNG1, GEM, CD58, ARRDC3, UBE2D3, ZNF181, SH3BGRL, BNIP3L, HIGD1A, WIPF1, ARPC5, SNRK, PSMD5, ZNF441, DCUN1D4, CAMK2N1, EEF1E1, ITGB3BP, CETN2, PLPP5, BCHE, ZNF83, RNASEH2B, MTBP, AGFG1, PPT1, DYRK1A, PTGES3, DRAM2, RHOQ, UCHL5, SLC39A6, CUL5, WDR35, EIF3E, KPNA3, UTRN, TERF2IP, TOPBP1, ZFP69B, THRB, IREB2, COL3A1, BICC1, ERAP1, CADM1, STAT1, UBE2N, NF…
GO:0048870	cell motility	689	6	2.65	691	0.04491	0.21451	1	1	Any process involved in the controlled self-propelled movement of a cell that results in translocation of the cell from one place to another	1.25635	-1.65456	SPNS2, ADAM8, TPGS1, BST2, TIE1, PREX1, SLC9B1, ITGB4, NPHP4, NOTCH1, ELMO3, TGFB1, HMOX1, LAMA2, CERS2, EFNB1, PPIL2, TSPO, CSF1, PGF, ZNF703, DAPK3, CTSH, SOCS7, CDC42BPB, APOE, PLXNB1, TRPM2, GAS6, CSPG4, SCRIB, IGFBP5, HYAL2, SPHK1, FLNA, TRPM4, SLC7A11, BRAT1, KIF14, POMGNT2, FSCN1, GPC1, HDAC5, SPECC1L, VAV2, PPM1F, DAB2IP, JUP, TYRO3, SUN2, BCAR1, ARHGAP35, SEMA4C, RPS19, PLEKHO1, SDC3, TN…	ITGB1, CD58, ARPC5, COL3A1, NFE2L2, NOV, PDCD10, OPHN1, PDGFD, PIK3R1, PHLDB2, PFN2, CPNE3, DNAJA1, RFFL, PDGFRA, RNF20, RTN4, ITGA4, PALLD, MYLK, PTPRK, PSG1, CCNYL1, SPAG9, IQGAP1, MCC, MATN2, CLIC4, CYP1B1, GNA13, HAS2, EFNB2, RAB11A, EPHA4, IL1B, ASPM, ARF4, CD47, WNT5A, DNAH11, NEXN, ANLN, JAM2, SMURF2, STRAP, DST, SRGAP2C, PROS1, YES1, SPAG16, AVL9, ITGA6, DNAAF2, TMF1, MET, ING2, GRB14, AG…
GO:0051674	localization of cell	689	6	2.65	692	0.04491	0.21451	1	1	Any process in which a cell is transported to, and/or maintained in, a specific location	1.25635	-1.65456	SPNS2, ADAM8, TPGS1, BST2, TIE1, PREX1, SLC9B1, ITGB4, NPHP4, NOTCH1, ELMO3, TGFB1, HMOX1, LAMA2, CERS2, EFNB1, PPIL2, TSPO, CSF1, PGF, ZNF703, DAPK3, CTSH, SOCS7, CDC42BPB, APOE, PLXNB1, TRPM2, GAS6, CSPG4, SCRIB, IGFBP5, HYAL2, SPHK1, FLNA, TRPM4, SLC7A11, BRAT1, KIF14, POMGNT2, FSCN1, GPC1, HDAC5, SPECC1L, VAV2, PPM1F, DAB2IP, JUP, TYRO3, SUN2, BCAR1, ARHGAP35, SEMA4C, RPS19, PLEKHO1, SDC3, TN…	ITGB1, CD58, ARPC5, COL3A1, NFE2L2, NOV, PDCD10, OPHN1, PDGFD, PIK3R1, PHLDB2, PFN2, CPNE3, DNAJA1, RFFL, PDGFRA, RNF20, RTN4, ITGA4, PALLD, MYLK, PTPRK, PSG1, CCNYL1, SPAG9, IQGAP1, MCC, MATN2, CLIC4, CYP1B1, GNA13, HAS2, EFNB2, RAB11A, EPHA4, IL1B, ASPM, ARF4, CD47, WNT5A, DNAH11, NEXN, ANLN, JAM2, SMURF2, STRAP, DST, SRGAP2C, PROS1, YES1, SPAG16, AVL9, ITGA6, DNAAF2, TMF1, MET, ING2, GRB14, AG…
GO:0000478	endonucleolytic cleavage involved in rRN...	12	1	0.05	1507	0.04515	1	1	1	Any endonucleolytic cleavage involved in the conversion of a primary ribosomal RNA (rRNA) transcript into a mature rRNA molecule. Some endonucleolytic cleavages produce the mature end, while others are a step in the process of generating the mature end from the pre-rRNA	0.206508	-0.0490259	RPSA, BOP1, RPS21	UTP23
GO:0000479	endonucleolytic cleavage of tricistronic...	12	1	0.05	1508	0.04515	1	1	1	Endonucleolytic cleavage of a pre-rRNA molecule originally produced as a tricistronic rRNA transcript that contains the Small SubUnit (SSU) rRNA, the 5.8S rRNA, and the Large SubUnit (LSU) rRNA, in that order, from 5' to 3' along the primary transcript. Primary ribosomal RNA transcripts with three genes, in this order, are produced in the nuclei of many eukaryotic species, including S. cerevisiae	0.206508	-0.0490259	RPSA, BOP1, RPS21	UTP23
GO:0034383	low-density lipoprotein particle clearan...	12	1	0.05	180	0.04515	0.04515	1	1	The process in which a low-density lipoprotein particle is removed from the blood via receptor-mediated endocytosis and its constituent parts degraded	0.474353	0.242489	HMOX1, CNPY2, LDLR, WASHC1, CSK, SCARB1
GO:0036010	protein localization to endosome	12	1	0.05	1509	0.04515	1	1	1	A process in which a protein is transported to, or maintained in, a location within an endosome	0.258758	0.0286172	SCRIB, TOLLIP, PACSIN2	TMEM30A
GO:0042491	auditory receptor cell differentiation	12	1	0.05	181	0.04515	0.04515	1	1	The process in which a relatively unspecialized cell acquires specialized features of an auditory hair cell	0.0717265	-0.260303	NOTCH1, SCRIB	RBPJ, MCOLN3
GO:0044030	regulation of DNA methylation	12	1	0.05	1510	0.04515	1	1	1	Any process that modulates the frequency, rate or extent of the covalent transfer of a methyl group to either N-6 of adenine or C-5 or N-4 of cytosine	0.148413	-0.14416	FAM129B, MBD3	RLF, MBD2, MIS18A
GO:0048741	skeletal muscle fiber development	12	1	0.05	182	0.04515	0.04515	1	1	The process whose specific outcome is the progression of the skeletal muscle fiber over time, from its formation to the mature structure. Muscle fibers are formed by the maturation of myotubes. They can be classed as slow, intermediate/fast or fast	0.172604	-0.00258558	FAM129B	MYORG
GO:0048820	hair follicle maturation	12	1	0.05	183	0.04515	0.04515	1	1	A developmental process, independent of morphogenetic (shape) change, that is required for a hair follicle to attain its fully functional state	-0.00450044	-0.320865	TRPC4AP	RBPJ, WNT5A, TGFB2
GO:0061082	myeloid leukocyte cytokine production	12	1	0.05	1511	0.04515	1	1	1	Any process that contributes to cytokine production by a myeloid cell	0.0784494	-0.334383	TGFB1, HMOX1, GAS6, SEMA7A	GPRC5B, WNT5A, SIRT1, TGFB2, TLR4, BCL6
GO:0090189	regulation of branching involved in uret...	12	1	0.05	184	0.04515	0.04515	1	1	Any process that modulates the rate, frequency or extent of branching involved in ureteric bud morphogenesis, the process in which the branching structure of the ureteric bud is generated and organized. The ureteric bud is an epithelial tube that grows out from the metanephric duct. The bud elongates and branches to give rise to the ureter and kidney collecting tubules	0.0952101	-0.148156	TGFB1, MAGED1
GO:1903306	negative regulation of regulated secreto...	12	1	0.05	1512	0.04515	1	1	1	Any process that stops, prevents or reduces the frequency, rate or extent of regulated secretory pathway	0.308037	-0.00917315	NOTCH1, HMOX1, CBARP, BCR	RAP1B, REST, FMR1
GO:1904705	regulation of vascular smooth muscle cel...	12	1	0.05	185	0.04515	0.04515	1	1		0.127628	-0.140635	HMOX1	CDKN1B, TPM1
GO:1904814	regulation of protein localization to ch...	12	1	0.05	186	0.04515	0.04515	1	1		-0.0656182	-0.316706	WRAP53	TCP1, CCT6A, GNL3
GO:1990874	vascular smooth muscle cell proliferatio...	12	1	0.05	187	0.04515	0.04515	1	1		0.127628	-0.140635	HMOX1	CDKN1B, TPM1
GO:0016043	cellular component organization	3804	20	14.61	1058	0.04549	0.43887	1	1	A process that results in the assembly, arrangement of constituent parts, or disassembly of a cellular component	1.83431	-1.9925	CRYAB, HTRA1, IGFBP7, OSGIN1, SPP1, TSNARE1, SEMA6C, ADAM8, TPGS1, BST2, FTCD, TIE1, LRP8, CCNK, TUBB2A, PHC1, RHOF, PREX1, BRF1, EGLN2, REC8, IBA57, CRTC1, IPO4, ARAP1, LRFN3, ITGB4, VILL, STMN3, RTEL1, PANX2, NPHP4, NOTCH1, HTT, IGFBP2, NPHP1, CROCC, GRWD1, NDUFA11, TGFB1, HMOX1, NRF1, LAMA2, TLN2, CERS2, EFNB1, RAB4B-EGLN2, TRPV2, PPIL2, TAP1, KIF13B, TSPO, SCN1B, OLFML2A, WRAP53, COL6A2, SZT2…	ITGB1, CENPQ, CCNG1, GEM, UBE2D3, BNIP3L, WIPF1, ARPC5, SLU7, RPF1, NEDD1, PSMD5, ITGB3BP, CETN2, LRRCC1, DNAJC28, MTBP, AGFG1, ACTR6, PPT1, PTGES3, RHOQ, WDR35, KPNA3, CLVS1, TANC1, UTRN, TERF2IP, COL3A1, PRPF39, PEX3, CADM1, UBE2N, NFE2L2, POLE2, POT1, ZMYM6, PHIP, YEATS4, IFT74, ZMPSTE24, SLC25A46, CETN3, HAT1, BAZ2A, NOV, RPGR, PDCD10, TNFRSF11B, ZBTB1, SNX14, OPHN1, FMN2, PIK3R1, CAPZA1, SRP…
GO:0002262	myeloid cell homeostasis	89	2	0.34	188	0.04554	0.04554	1	1	The process of regulating the proliferation and elimination of myeloid cells such that the total number of myeloid cells within a whole or part of an organism is stable over time in the absence of an outside stimulus	0.649651	-0.795374	HMOX1, ISG15, THRA, ZNF16, RPS19, BAP1, P4HTM, STAT5B, BAK1, PIK3CD, HOXB6	PTBP3, SMAP1, ZFP36L1, B2M, RB1, ACVR2A, SENP1, SLC11A2, LYN, AXL, CDK6, NCSTN, BCL6, HSPA9, RPS24, IL6, GATA3, ATP5IF1, SMAD5
GO:0030330	DNA damage response, signal transduction...	90	2	0.35	189	0.04647	0.04647	1	1	A cascade of processes induced by the cell cycle regulator phosphoprotein p53, or an equivalent protein, in response to the detection of DNA damage	0.602666	-1.04797	PIDD1, PLK3, UBC, MUC1, TFAP4, FOXM1, TNKS1BP1, MDM4, SESN2, RBL2, E2F1	EEF1E1, DYRK1A, NPM1, CNOT8, PCNA, CDKN1B, SIRT1, CNOT2, PSMD10, TRIAP1, DDX5, CNOT1, CNOT4, CD44, SPRED2, SENP2, CNOT6, ATM, CASP2, CNOT10, EP300, SOX4, GADD45A, CNOT9, RGCC, CCNB1, RPL26
GO:0032270	positive regulation of cellular protein ...	880	7	3.38	190	0.04651	0.04651	1	1	Any process that activates or increases the frequency, rate or extent of the chemical reactions and pathways involving a protein, occurring at the level of an individual cell	1.20411	-1.6219	ADAM8, CARD9, TNFRSF19, LRP8, CCNK, PSMA6, PIDD1, PRKAR1B, IKBKG, FZD8, FGFR3, TGFB1, MAPK11, CSF1, CDK20, ABCA7, CTSH, RAPGEF1, CLIP3, APOE, ANAPC2, GAS6, CSPG4, MADD, SEMA7A, CDK9, SREBF1, TOLLIP, SPHK1, MAGED1, SPPL3, PSMB10, PTPA, STK11, TICAM1, MAPK12, BRAT1, S1PR2, PLK3, MAPT, KIF14, C1QTNF2, MAP2K3, NR1H2, PPM1F, DAB2IP, RNF166, AXIN1, CAMKK1, SEMA4C, CLN6, RAMP1, UBC, TELO2, TNK2, CARD10,…	ARRDC3, PSMD5, DCUN1D4, DYRK1A, WDR35, EIF3E, TERF2IP, UBE2N, NFE2L2, PDCD10, PDGFD, GPRC5B, DVL3, ARL6IP5, PAIP1, PFN2, PIBF1, MNAT1, SUMO1, ADNP, MAP3K20, EED, HSPH1, EIF2AK2, PSMD12, NPM1, DCUN1D5, FAM129A, PDGFRA, RYK, PSMA4, RNF20, RNF111, PSMC6, PPP2R3C, UBE3A, MAP3K1, PRKACB, CDC27, TOPORS, CARD8, CDC23, PKD2, MAP4K5, SOCS5, PRKAR1A, SPAG9, STRADB, PRNP, IQGAP1, NRK, STK3, GDF6, MAP4K3, AR…
GO:0009653	anatomical structure morphogenesis	1274	9	4.89	191	0.04656	0.04656	1	1	The process in which anatomical structures are generated and organized. Morphogenesis pertains to the creation of form	1.41194	-1.6764	HTRA1, SPP1, SEMA6C, APLP1, ADAM8, AL928654.3, TIE1, LRP8, PSMA6, ADAMTS1, PREX1, FZD8, ANKRD11, ARAP1, LRFN3, ITGB4, SUFU, NOTCH1, FGFR3, TGFB1, MEF2D, HMOX1, LAMA2, EFNB1, TRPV2, KIF13B, SCN1B, SZT2, SDK1, CSF1, LZTS1, ADAMTS16, PGF, CTNNBIP1, NBEAL2, DAPK3, CTSH, SOCS7, TBX2, WASF3, APOE, PLXNB1, ANAPC2, RNH1, CSPG4, SCX, SEMA7A, SCRIB, STK40, NEO1, IGFBP5, HYAL2, SPHK1, MAGED1, FLNA, PSMB10, …	ITGB1, PSMD5, AGFG1, RHOQ, UCHL5, TANC1, THRB, COL3A1, ERAP1, STAT1, NFE2L2, ZMYM6, PHIP, PTBP3, NOV, PDCD10, TNFRSF11B, OPHN1, PIK3R1, PHLDB2, GJA1, DVL3, CPE, AGTPBP1, ADNP, MAP3K20, RARB, DNM1L, SNX2, COL5A2, PSMD12, PDGFRA, GLMN, RYK, PSMA4, RTN4, RBPJ, RAB10, CDC7, PSMC6, CREB1, PRKACB, ITGA4, WARS2, TOPORS, PALLD, MYLK, TRIM13, AFF3, MBNL1, MTDH, PKD2, LIPA, HPSE, WWTR1, PRKAR1A, RC3H1, STR…
GO:1903507	negative regulation of nucleic acid-temp...	696	6	2.67	192	0.04682	0.04682	1	1	Any process that stops, prevents or reduces the frequency, rate or extent of nucleic acid-templated transcription	0.99427	-1.66464	LRP8, KLF16, FZD8, SUFU, HES6, NOTCH1, TGFB1, SBNO2, ZNF219, CTNNBIP1, ZNF703, ZGLP1, BAHD1, TBX2, GFI1, GLIS2, HIC2, GAS6, SCX, SREBF1, MAGED1, FLNA, RPL10, SCMH1, THRA, PITX1, PTCH1, ZKSCAN3, USP3, FAM129B, CBX6, CCDC85B, MBD3, PLK3, GON4L, NR1H2, HDAC5, KLF12, PPM1F, DAB2IP, NELFB, AXIN1, ARHGAP35, ZHX2, MXD3, APBB1, SIRT6, UBC, KCNIP3, RECQL5, CCAR1, KMT2D, HINFP, CIC, HSF1, TNRC18, CEBPB, CB…	ZNF675, FAM220A, UBE2D3, THRB, STAT1, ZBTB33, HAT1, BAZ2A, ZBTB1, KDM5A, ZNF224, SUMO1, EED, RARB, BPTF, TRIM33, TBL1XR1, CGGBP1, CLOCK, RBPJ, UBA3, CREB1, TDP2, HIST1H2AC, ZMYND11, PTPRK, MTDH, WWP1, CBX3, WWTR1, EPC1, UBP1, NFIL3, ZNF217, DKK1, MTERF3, BASP1, WNT5A, ZNF93, IRF2, CHCHD3, GLIS3, SMURF2, SIM2, CNBP, SAP30, STRAP, BTAF1, TRIM24, CDKN1B, SIRT1, GMNN, CNOT2, NFE2L3, SUZ12, URI1, EIF4…
GO:0016236	macroautophagy	214	3	0.82	193	0.04813	0.04813	1	1	The major inducible pathway for the general turnover of cytoplasmic constituents in eukaryotic cells, it is also responsible for the degradation of active cytoplasmic enzymes and organelles during nutrient starvation. Macroautophagy involves the formation of double-membrane-bounded autophagosomes which enclose the cytoplasmic constituent targeted for degradation in a membrane-bounded structure, w…	0.816912	-1.20916	IKBKG, HTT, HMOX1, LZTS1, ATG2A, PACS2, SNAP29, LAMTOR4, ATG4B, TBC1D14, UBC, VPS13C, ATP6V1C2, AMBRA1, CLN3, TOMM5, QSOX1, STBD1, MVB12A, LRSAM1, C6orf106, SESN2, TCIRG1, SNX32, CLEC16A, ZFYVE1, NRBP2, TBC1D25, VPS28, MLST8	BNIP3L, SNX14, CHMP2B, TOMM20, VPS36, TRIM13, VPS37A, EXOC8, SCOC, MTERF3, MAP3K7, BECN1, SCFD1, EXOC1, DYNLL2, ATP6V1D, SIRT1, EI24, MAP1LC3B, RAB7A, PIKFYVE, TBC1D12, TOMM70, RRAGB, VPS4B, VPS35, TBK1, CHMP3, VTA1, PRKAB2, RAB1A, ATG5, LAMP2, ATG4A, RALB, ATP6V0E1, MAPK8, SNX5, EPM2A, SH3GLB1, PIP4K2A, RUBCN, RNF5, RAB5A, PRKAA1, ATP6V1B2, ATG3, WAC, DYNLL1
GO:0009892	negative regulation of metabolic process	1702	11	6.54	337	0.04814	0.08563	1	1	Any process that stops, prevents, or reduces the frequency, rate or extent of the chemical reactions and pathways within a cell or an organism	1.49859	-1.83689	CRYAB, WDR81, APLP1, LAG3, BST2, LMTK3, LRP8, PSMA6, PRKAR1B, WFIKKN1, KLF16, PREX1, FZD8, RTEL1, SUFU, HES6, EXOSC6, NOTCH1, TGFB1, HMOX1, TSPO, NEIL1, SBNO2, ISG15, LZTS1, ZNF219, CTNNBIP1, CNPY2, AKR1C3, ABCA7, RGS3, ZNF703, DAPK3, ZGLP1, RAPGEF1, SOCS7, BAHD1, TBX2, PC, GFI1, PKMYT1, GLIS2, APOE, ANAPC2, HIC2, RNH1, GAS6, SCX, CDK9, SREBF1, IGFBP5, HYAL2, MAGED1, FLNA, PSMB10, RPL10, PTPA, SC…	ZNF675, FAM220A, ARRDC3, UBE2D3, PSMD5, CAMK2N1, RNASEH2B, DYRK1A, UCHL5, WDR35, EIF3E, TERF2IP, THRB, IREB2, STAT1, POT1, ZBTB33, PTBP3, HAT1, BAZ2A, TENT2, PDCD10, ZBTB1, OPHN1, FMN2, GJA1, KDM5A, PAIP1, GSPT1, ZNF224, SRP9, SNX3, NIFK, DNAJA1, PIBF1, SUMO1, ADNP, EED, RARB, RFFL, HSPH1, GSPT2, EIF2AK2, BPTF, PSMD12, NPM1, RPL39, FAM129A, TRIM33, ARPP19, TBL1XR1, GLMN, CGGBP1, PNRC2, RPL15, TSN…
GO:0044774	mitotic DNA integrity checkpoint	92	2	0.35	194	0.04834	0.04834	1	1	A mitotic cell cycle process that controls cell cycle progression in response to changes in DNA structure by monitoring the integrity of the DNA. The DNA integrity checkpoint begins with detection of DNA damage, defects in DNA structure or DNA replication, and ends with signal transduction	0.588053	-0.995628	PIDD1, PLK3, UBC, MUC1, HUS1, TNKS1BP1, MDM4, FOXO4, RBL2, FBXO31, E2F1	TOPBP1, NPM1, CNOT8, NAE1, SYF2, PCNA, TAOK3, CDKN1B, CNOT2, ATF2, MSH2, TRIAP1, CNOT1, CNOT4, TIPIN, CNOT6, RFWD3, ATM, CASP2, RAD17, TOP2B, CNOT10, EP300, SETMAR, SOX4, GADD45A, RPA2, CNOT9, RGCC, CCNB1, RPL26
GO:0051443	positive regulation of ubiquitin-protein...	92	2	0.35	195	0.04834	0.04834	1	1	Any process that activates, maintains or increases the rate of ubiquitin transferase activity	0.632381	-1.37627	PSMA6, ANAPC2, PSMB10, AXIN1, UBC, ANAPC11, ANAPC7, DCUN1D2, FZR1	ARRDC3, PSMD5, DCUN1D4, UBE2N, PSMD12, DCUN1D5, PSMA4, PSMC6, CDC27, TOPORS, CDC23, FBXW7, PSMA1, ANAPC10, UBE2E1, PSMD10, RAB1A, PSMD14, PSMD6, PSMD7, PSMA3, SKP1, CCNB1
GO:2000058	regulation of protein ubiquitination inv...	92	2	0.35	196	0.04834	0.04834	1	1	Any process that modulates the frequency, rate or extent of protein ubiquitination involved in ubiquitin-dependent protein catabolic process	0.709275	-1.11765	PSMA6, SUFU, ANAPC2, PSMB10, AXIN1, UBC, CCDC22, ANAPC11, ANAPC7, FZR1, SGTA	PSMD5, PSMD12, PSMA4, PSMC6, UBE3A, CDC27, CDC23, FBXW7, PSMA1, ANAPC10, UBE2E1, PSMD10, PSMD14, PSMD6, PSMD7, RNF139, PTK2, PSMA3, TAF1, SKP1, CCNB1
GO:0014904	myotube cell development	13	1	0.05	197	0.04882	0.04882	1	1	The process aimed at the progression of a myotube cell over time, from initial commitment of the cell to a specific fate, to the fully functional differentiated cell. Myotubes are multinucleated cells that are formed when proliferating myoblasts exit the cell cycle, differentiate and fuse	0.172604	-0.0765673	FAM129B	MYORG
GO:0033006	regulation of mast cell activation invol...	13	1	0.05	1513	0.04882	1	1	1	Any process that modulates the frequency, rate, or extent of mast cell activation as part of an immune response	0.0787349	-0.309369	HMOX1, GAB2	VAMP7, SNX4, LYN, STYK1
GO:0043304	regulation of mast cell degranulation	13	1	0.05	1514	0.04882	1	1	1	Any process that modulates the frequency, rate, or extent of mast cell degranulation	0.0787349	-0.309369	HMOX1, GAB2	VAMP7, SNX4, LYN, STYK1
GO:0050982	detection of mechanical stimulus	13	1	0.05	198	0.04882	0.04882	1	1	The series of events by which a mechanical stimulus is received and converted into a molecular signal	0.160304	-0.273474	PIEZO1, JUP, ASIC3, PKD1	PKD2, COL11A1, DENND5B
GO:0051497	negative regulation of stress fiber asse...	13	1	0.05	199	0.04882	0.04882	1	1	Any process that stops, prevents, or reduces the frequency, rate or extent of the assembly a stress fiber, a bundle of microfilaments and other proteins found in fibroblasts	-0.0285072	-0.457878	ARAP1	PHLDB2, MET, CLASP2, STMN1, TMEFF2, DLC1
GO:0061213	positive regulation of mesonephros devel...	13	1	0.05	200	0.04882	0.04882	1	1	Any process that increases the rate, frequency or extent of mesonephros development. Mesonephros development is the process whose specific outcome is the progression of the mesonephros over time, from its formation to the mature structure. The mesonephros is an organ that filters the blood and excretes the end products of body metabolism in the form of urine	0.0743977	-0.30788	TGFB1, MAGED1	BASP1, GATA3
GO:0070200	establishment of protein localization to...	13	1	0.05	201	0.04882	0.04882	1	1	The directed movement of a protein to a specific location in the telomeric region of a chromosome	0.0242962	-0.413981	WRAP53	POT1, TCP1, CCT6A
GO:0071243	cellular response to arsenic-containing ...	13	1	0.05	202	0.04882	0.04882	1	1	Any process that results in a change in state or activity of a cell (in terms of movement, secretion, enzyme production, gene expression, etc.) as a result of an arsenic stimulus from compounds containing arsenic, including arsenates, arsenites, and arsenides	0.238997	-0.00554166	HMOX1, HSF1
GO:1902742	apoptotic process involved in developmen...	13	1	0.05	203	0.04882	0.04882	1	1	Any apoptotic process that is involved in anatomical structure development	0.337451	-0.0189866	NOTCH1, SCRIB, FZD5, BAK1	TGFB2
GO:1902679	negative regulation of RNA biosynthetic ...	704	6	2.7	204	0.04906	0.04906	1	1	Any process that stops, prevents or reduces the frequency, rate or extent of RNA biosynthetic process	0.99427	-1.66464	LRP8, KLF16, FZD8, SUFU, HES6, NOTCH1, TGFB1, SBNO2, ZNF219, CTNNBIP1, ZNF703, ZGLP1, BAHD1, TBX2, GFI1, GLIS2, HIC2, GAS6, SCX, SREBF1, MAGED1, FLNA, RPL10, SCMH1, THRA, PITX1, PTCH1, ZKSCAN3, USP3, FAM129B, CBX6, CCDC85B, MBD3, PLK3, GON4L, NR1H2, HDAC5, KLF12, PPM1F, DAB2IP, NELFB, AXIN1, ARHGAP35, ZHX2, MXD3, APBB1, SIRT6, UBC, KCNIP3, RECQL5, CCAR1, KMT2D, HINFP, CIC, HSF1, TNRC18, CEBPB, CB…	ZNF675, FAM220A, UBE2D3, THRB, STAT1, ZBTB33, HAT1, BAZ2A, ZBTB1, KDM5A, ZNF224, SUMO1, EED, RARB, BPTF, TRIM33, TBL1XR1, CGGBP1, CLOCK, RBPJ, UBA3, CREB1, TDP2, HIST1H2AC, ZMYND11, TRIM13, PTPRK, MTDH, WWP1, CBX3, WWTR1, EPC1, UBP1, NFIL3, ZNF217, DKK1, MTERF3, BASP1, WNT5A, ZNF93, IRF2, CHCHD3, GLIS3, SMURF2, SIM2, CNBP, SAP30, STRAP, BTAF1, TRIM24, CDKN1B, SIRT1, GMNN, CNOT2, NFE2L3, SUZ12, UR…
GO:0006614	SRP-dependent cotranslational protein ta...	93	2	0.36	205	0.04928	0.04928	1	1	The targeting of proteins to a membrane that occurs during translation and is dependent upon two key components, the signal-recognition particle (SRP) and the SRP receptor. SRP is a cytosolic particle that transiently binds to the endoplasmic reticulum (ER) signal sequence in a nascent protein, to the large ribosomal unit, and to the SRP receptor in the ER membrane	0.560579	-0.991534	RPL10, RPSA, RPS19, RPS28, RPL31, SEC61A1, RPLP2, RPS10, RPS29, RPS21, RPS5, RPL37A, RPL13, RPL18	SRP19, SRP9, RPL39, RPL15, RPL36A, RPS3A, RPL9, SRP54, SRP14, SEC63, RPL17, SRP72, SSR3, RPS24, RPL30, RPL22, RPS4X, RPL26
GO:0033365	protein localization to organelle	707	6	2.72	442	0.04991	0.11837	1	1	A process in which a protein is transported to, or maintained in, a location within an organelle	0.942949	-1.71194	IPO4, SUFU, TSPAN10, CROCC, TGFB1, TSPO, WRAP53, SZT2, AP3D1, AKR1C3, ABCA7, SYT11, GLIS2, PEX6, GAS6, RAB11FIP3, SCRIB, SREBF1, TOLLIP, HYAL2, SPHK1, SPPL3, FLNA, RPL10, THRA, STK11, PARD6A, RPSA, DNLZ, TIMM44, MAPT, LAMTOR4, DCLK2, TSPAN17, PEX16, DAB2IP, JUP, ZDHHC8, SUN2, ARFRP1, RPS19, STIMATE, DVL1, PACSIN2, BAP1, CCDC22, NAGPA, TUB, VTI1A, PMM1, HHEX, KLHL21, BANP, RPS28, RPL31, TOMM5, IFT…	CENPQ, UBE2D3, BNIP3L, NEDD1, MTBP, WDR35, KPNA3, TERF2IP, PEX3, POT1, NOV, PIK3R1, SRP19, HSP90AA1, PEX12, SRP9, YWHAZ, DNAJA1, PIBF1, SUMO1, DNM1L, UGCG, TIMM17A, HSPH1, TOMM20, CCDC14, RPL39, VPS36, RPL15, ZFYVE16, RTN4, RAB10, NPEPPS, WDR75, NUP35, RAB6A, KDELR3, TOPORS, TRNT1, TNPO1, PKD2, WWTR1, FBXW7, CNTLN, CEP68, G3BP2, CSNK2A2, NUP54, SSB, TCP1, KPNA4, RANBP6, BBIP1, RPL36A, RAB11A, IL1…

## Sheet: top 80 upreg
GO id	Term	Genes in genome (background)	Genes in top-80 upreg	Expected genes in top-80 upreg	Rank in P.Fisher.elim	P.Fisher	P.Fisher.elim	FDR.Fisher	FDR.Fisher.elim	Description	Avg.LogFC for top-10 upreg	Avg.LogFC for top-10 downreg	Upreg genes (LogFC > 0.4)	Downreg genes (LogFC < -0.4)
GO:0042255	ribosome assembly	46	4	0.34	133	0.00034	0.0229	0.843678	1	The aggregation, arrangement and bonding together of the mature ribosome and of its subunits	0.585094	-0.886534	RPL10, RPSA, DDX28, RPS19, DHX30, RPS28, NOP53, RPS10, NSUN4	RPF1, EIF2A, NPM1, BRIX1, MTERF3, SBDS, MTERF4, FASTKD2, RPF2
GO:0043085	positive regulation of catalytic activit...	951	17	6.98	8	0.00037	0.0033	0.843678	1	Any process that activates or increases the activity of an enzyme	1.18495	-1.72757	NOXA1, ADAM8, LRP8, CCNK, PSMA6, PIDD1, PRKAR1B, IKBKG, PREX1, FZD8, ARAP1, RGS12, FGFR3, TGFB1, MAPK11, WRAP53, CSF1, SBF1, CDK20, RGS3, CTSH, DENND4A, RAPGEF1, APOE, PLXNB1, ANAPC2, RANGAP1, GAS6, CSPG4, MADD, SCRIB, PLEKHG4, MAGED1, PSMB10, ARHGEF10L, PTPA, VPS9D1, PLEKHG3, STK11, ZNF16, AGAP6, RABEP2, TBC1D22A, MAPK12, RAP1GAP2, GCLM, TRAPPC9, ARHGEF19, S1PR2, MAPT, LAMTOR4, KIF14, RALGDS, C1…	ITGB1, ARRDC3, PSMD5, DCUN1D4, AGFG1, PTGES3, WDR35, UBE2N, POT1, RPGR, PDCD10, LINC02210-CRHR1, OPHN1, PDGFD, TIAM2, GPRC5B, DVL3, HSP90AA1, ARL6IP5, FBXO8, PFN2, DNAJA1, PIBF1, MNAT1, SUMO1, ADNP, MAP3K20, DNM1L, HSPH1, EIF2AK2, PSMD12, DCUN1D5, ASAP2, PDGFRA, TRAPPC6B, DEPDC7, SNX13, PSMA4, PSMC6, PPP2R3C, AC091057.1, MAP3K1, AZIN1, PRKACB, RCBTB2, CDC27, TOPORS, CARD8, CDC23, DBF4, PKD2, MAP4…
GO:0044093	positive regulation of molecular functio...	1141	19	8.38	1693	0.00038	0.5869	0.843678	1	Any process that activates or increases the rate or extent of a molecular function, an elemental biological activity occurring at the molecular level, such as catalysis or binding	1.18495	-1.81873	NOXA1, ADAM8, LRP8, CCNK, PSMA6, PIDD1, PRKAR1B, IKBKG, PREX1, FZD8, CRTC1, ARAP1, RGS12, HTT, FGFR3, TGFB1, MAPK11, WRAP53, CSF1, SBF1, CDK20, RGS3, CTSH, DENND4A, RAPGEF1, APOE, PLXNB1, ANAPC2, RANGAP1, GAS6, CSPG4, MADD, CDK9, SCRIB, PLEKHG4, SPHK1, MAGED1, SPPL3, PSMB10, ARHGEF10L, PTPA, VPS9D1, PLEKHG3, STK11, ZNF16, TICAM1, RFNG, AGAP6, RABEP2, TBC1D22A, MAPK12, RAP1GAP2, GCLM, TRAPPC9, JPH…	ITGB1, FAM220A, ARRDC3, PSMD5, DCUN1D4, AGFG1, PTGES3, WDR35, EIF3E, TERF2IP, UBE2N, POT1, RPGR, PDCD10, LINC02210-CRHR1, OPHN1, PDGFD, TIAM2, GPRC5B, DVL3, HSP90AA1, ARL6IP5, FBXO8, PFN2, DNAJA1, PIBF1, MNAT1, SUMO1, ADNP, MAP3K20, DNM1L, HSPH1, EIF2AK2, PSMD12, NPM1, DCUN1D5, ASAP2, PDGFRA, TRAPPC6B, DEPDC7, SNX13, PSMA4, CLOCK, PSMC6, PPP2R3C, AC091057.1, MAP3K1, AZIN1, PRKACB, RCBTB2, MBTPS2,…
GO:0048519	negative regulation of biological proces...	2815	33	20.67	17	0.00109	0.0063	0.843678	1	Any process that stops, prevents, or reduces the frequency, rate or extent of a biological process. Biological processes are regulated by many means; examples include the control of gene expression, protein modification or interaction with a protein or substrate molecule	1.81046	-2.00252	CRYAB, HTRA1, IGFBP7, OSGIN1, SPP1, WDR81, APLP1, LAG3, ADAM8, BST2, LMTK3, TIE1, LRP8, CCNK, PSMA6, ADAMTS1, PIDD1, PRKAR1B, IKBKG, WFIKKN1, KLF16, PREX1, FZD8, CRTC1, ARAP1, VILL, STMN3, RTEL1, SUFU, RGS12, NPHP4, HES6, EXOSC6, NOTCH1, HTT, IGFBP2, FGFR3, TGFB1, HMOX1, MAPK11, CERS2, TSPO, SZT2, NEIL1, SBNO2, GDPD5, ISG15, LZTS1, ZNF219, CTNNBIP1, CNPY2, SLC35F6, MC1R, AKR1C3, ABCA7, RGS3, ZNF7…	ITGB1, ZNF675, FAM220A, ARRDC3, UBE2D3, BNIP3L, HIGD1A, PSMD5, CAMK2N1, EEF1E1, BCHE, RNASEH2B, MTBP, PPT1, DYRK1A, RHOQ, UCHL5, CUL5, WDR35, EIF3E, TERF2IP, TOPBP1, THRB, IREB2, COL3A1, BICC1, STAT1, NFE2L2, POT1, PHIP, IFT74, ZBTB33, PTBP3, HAT1, BAZ2A, NOV, TENT2, PDCD10, LINC02210-CRHR1, TNFRSF11B, ZBTB1, OPHN1, FMN2, PIK3R1, CAPZA1, ZNF655, PHLDB2, GJA1, DVL3, LRRC17, KDM5A, ARL6IP5, PAIP1, …
GO:0097006	regulation of plasma lipoprotein particl...	29	3	0.21	2030	0.0012	1	0.843678	1	Any process involved in the maintenance of internal levels of plasma lipoprotein particles within an organism	0.676109	-0.339271	HMOX1, CNPY2, ABCA7, APOE, NR1H2, LDLR, WASHC1, CSK, SCARB1	ABCA5, AGTR1, ACSL3
GO:0043065	positive regulation of apoptotic process	378	9	2.78	1	0.00165	0.0016	0.843678	1	Any process that activates or increases the frequency, rate or extent of cell death by apoptotic process	1.10799	-1.59944	OSGIN1, ADAM8, PIDD1, PREX1, NOTCH1, HTT, TGFB1, HMOX1, TSPO, AKR1C3, BIN1, DAPK3, CTSH, CLIP3, SCRIB, HYAL2, MAGED1, PTPA, CDK19, ARHGEF19, MAPT, ARHGEF4, VAV2, PPM1F, DAB2IP, APBB1, UBC, TNFSF12, AKAP13, COL18A1, HSF1, NFATC4, RASSF2, TFAP4, TRADD, AIFM2, CAPN10, NQO1, BCL2L1, ADAMTSL4, PLEKHG5, MAP3K11, PLEKHF1, TRIO, PPP3R1, BID, MAPK9, NLRP3, BBC3, BAD, TIAM1, MUL1, BAK1, PDGFRB, SMPD1, PSEN…	ITGB1, BNIP3L, EEF1E1, ITGB3BP, WDR35, TIAM2, ARL6IP5, YWHAZ, DNAJA1, MAP3K20, RARB, DNM1L, CREB1, CARD8, PRNP, STK3, FBXW7, CYP1B1, GNA13, PRKRA, MAP2K4, WNT5A, YWHAH, DYNLL2, SOS2, CDKN1B, ITGA6, SIRT1, MFF, ATF2, NCK1, EIF2S1, ING3, TGFB2, LATS2, PPID, SERINC3, CDC42, SENP1, NKX3-1, NET1, PDCD5, LYN, SHQ1, ECT2, STK4, REST, TNFAIP8, NCSTN, HSPD1, TFAP2A, GSDME, ATM, BCL6, ZC3H8, PRKCI, CASP2, …
GO:0051345	positive regulation of hydrolase activit...	538	11	3.95	104	0.00168	0.0202	0.843678	1	Any process that activates or increases the frequency, rate or extent of hydrolase activity, the catalysis of the hydrolysis of various bonds	0.94232	-1.54474	PIDD1, PREX1, ARAP1, RGS12, FGFR3, SBF1, RGS3, CTSH, DENND4A, RAPGEF1, PLXNB1, RANGAP1, MADD, SCRIB, PLEKHG4, ARHGEF10L, PTPA, VPS9D1, PLEKHG3, AGAP6, RABEP2, TBC1D22A, MAPK12, RAP1GAP2, TRAPPC9, ARHGEF19, MAPT, LAMTOR4, RALGDS, NR1H2, ARHGEF4, VAV2, PPM1F, DAB2IP, AXIN1, ARHGAP35, GMIP, TBC1D14, TBCD, SIPA1L3, ARFGAP1, RGS20, DEPDC5, AKAP13, DENND3, TBC1D13, TRAPPC6A, DOCK6, PTPN1, GNB5, HRAS, D…	ITGB1, AGFG1, WDR35, POT1, RPGR, OPHN1, TIAM2, DVL3, ARL6IP5, FBXO8, PFN2, DNAJA1, SUMO1, DNM1L, ASAP2, PDGFRA, TRAPPC6B, DEPDC7, SNX13, AC091057.1, RCBTB2, CARD8, DENND6A, IQGAP1, RASA1, ELMOD2, PCNA, AHSA2P, SMAP1, DIS3, GNA13, PPP1R12A, ARF4, ARHGAP5, PICALM, WNT5A, DNAJC2, FAM13B, CHML, SRGAP2C, EIF5, GDI2, SOS2, CDC42EP3, ASPH, CALM2, DOCK11, CDKN1B, ITGA6, SIRT1, MSH6, MET, CYFIP2, AGTR1, M…
GO:0043068	positive regulation of programmed cell d...	381	9	2.8	2031	0.00174	1	0.843678	1	Any process that activates or increases the frequency, rate or extent of programmed cell death, cell death resulting from activation of endogenous cellular processes	1.10799	-1.59944	OSGIN1, ADAM8, PIDD1, PREX1, NOTCH1, HTT, TGFB1, HMOX1, TSPO, AKR1C3, BIN1, DAPK3, CTSH, CLIP3, SCRIB, HYAL2, MAGED1, PTPA, CDK19, ARHGEF19, MAPT, ARHGEF4, VAV2, PPM1F, DAB2IP, APBB1, UBC, TNFSF12, AKAP13, COL18A1, HSF1, NFATC4, RASSF2, TFAP4, TRADD, AIFM2, CAPN10, NQO1, BCL2L1, ADAMTSL4, PLEKHG5, MAP3K11, PLEKHF1, TRIO, PPP3R1, BID, MAPK9, NLRP3, BBC3, BAD, TIAM1, MUL1, BAK1, PDGFRB, SMPD1, PSEN…	ITGB1, BNIP3L, EEF1E1, ITGB3BP, WDR35, TIAM2, ARL6IP5, YWHAZ, DNAJA1, MAP3K20, RARB, DNM1L, CREB1, CARD8, PRNP, STK3, FBXW7, CYP1B1, GNA13, PRKRA, MAP2K4, WNT5A, YWHAH, DYNLL2, SOS2, CDKN1B, ITGA6, SIRT1, MFF, ATF2, NCK1, EIF2S1, ING3, TGFB2, LATS2, PPID, SERINC3, CDC42, SENP1, NKX3-1, NET1, PDCD5, LYN, SHQ1, ECT2, STK4, REST, TNFAIP8, NCSTN, HSPD1, TFAP2A, GSDME, ATM, BCL6, ZC3H8, PRKCI, CASP2, …
GO:0060548	negative regulation of cell death	543	11	3.99	61	0.00181	0.0119	0.843678	1	Any process that decreases the rate or frequency of cell death. Cell death is the specific activation or halting of processes within a cell so that its vital functions markedly cease, rather than simply deteriorating gradually over time, which culminates in cell death	1.25242	-1.64446	CRYAB, ADAM8, PIDD1, IKBKG, NOTCH1, HTT, HMOX1, SLC35F6, CTSH, PYCR1, APOE, ATAD3A, GAS6, SCX, STK40, SPHK1, FLNA, RPL10, ZNF16, FAM129B, GCLM, PLK3, KIF14, TMEM259, TYRO3, UBC, XIAP, PTPN1, HRAS, CTTN, HSF1, CDSN, CEBPB, HYOU1, MUC1, TRADD, NUAK2, NQO1, POR, NKX3-2, AMBRA1, BCL2L1, TMEM161A, CBL, CLN8, SH3RF1, PELI3, LRP1, PPARD, CLN3, SPHK2, ARHGAP10, UCN, MICAL1, ARHGDIA, WFS1, SMAD6, STAT5B, …	ITGB1, BNIP3L, HIGD1A, PPT1, NFE2L2, PHIP, PDCD10, FMN2, PIK3R1, YWHAZ, DNAJA1, MNAT1, ADNP, RARB, RFFL, HSPH1, EIF2AK2, NPM1, GPAM, CREB1, FAIM, TOPORS, ZMYND11, TAF9, MTDH, RRM2B, STRADB, PRNP, RASA1, DKK1, KLHL20, TPT1, MAP2K4, ARL6IP1, IL1B, CACYBP, RHBDD1, ARF4, BECN1, WNT5A, RPS3A, CDKN1B, DAD1, ITGA6, SIRT1, TMF1, NOTCH2, MET, PSMG2, ING2, PLAC8, URI1, SIN3A, HDAC2, MSH2, BIRC2, PSMD10, NC…
GO:0045987	positive regulation of smooth muscle con...	9	2	0.07	2	0.00185	0.0018	0.843678	1	Any process that activates or increases the frequency, rate or extent of smooth muscle contraction	0.0276321	0.0276321	SPHK1, CTTN	OXTR
GO:0010941	regulation of cell death	915	15	6.72	618	0.00214	0.1326	0.843678	1	Any process that modulates the rate or frequency of cell death. Cell death is the specific activation or halting of processes within a cell so that its vital functions markedly cease, rather than simply deteriorating gradually over time, which culminates in cell death	1.44425	-1.74756	CRYAB, OSGIN1, ADAM8, CARD9, PIDD1, IKBKG, PREX1, EGLN2, NOTCH1, HTT, TGFB1, HMOX1, TSPO, TNFRSF25, SLC35F6, AKR1C3, BIN1, DAPK3, CTSH, PYCR1, HS1BP3, CLIP3, APOE, ATAD3A, GAS6, MADD, SCX, SCRIB, STK40, HYAL2, SPHK1, MAGED1, FLNA, RPL10, PTPA, THRA, CDK19, ZNF16, FAM129B, GCLM, ARHGEF19, PLK3, KATNB1, MAPT, KIF14, TMEM259, ARHGEF4, VAV2, PPM1F, DAB2IP, TYRO3, BCAR1, APBB1, UBC, ALX3, TNFSF12, CAR…	ITGB1, BNIP3L, HIGD1A, EEF1E1, ITGB3BP, PPT1, WDR35, STAT1, NFE2L2, PHIP, PDCD10, TNFRSF11B, FMN2, PIK3R1, TIAM2, ARL6IP5, RASSF3, YWHAZ, DNAJA1, MNAT1, ADNP, MAP3K20, RARB, DNM1L, RFFL, HSPH1, EIF2AK2, NPM1, RTN4, GPAM, CREB1, FAIM, TOPORS, CARD8, ZMYND11, TAF9, TRIM13, MTDH, NAE1, RRM2B, STRADB, PRNP, STK3, RASA1, GDF6, FBXW7, DKK1, CYP1B1, KLHL20, TCP1, GNA13, OMA1, PRKRA, TPT1, MAP2K4, ARL6IP…
GO:0010942	positive regulation of cell death	396	9	2.91	2032	0.00226	1	0.843678	1	Any process that increases the rate or frequency of cell death. Cell death is the specific activation or halting of processes within a cell so that its vital functions markedly cease, rather than simply deteriorating gradually over time, which culminates in cell death	1.10799	-1.59944	OSGIN1, ADAM8, PIDD1, PREX1, NOTCH1, HTT, TGFB1, HMOX1, TSPO, AKR1C3, BIN1, DAPK3, CTSH, CLIP3, SCRIB, HYAL2, MAGED1, PTPA, CDK19, ARHGEF19, KATNB1, MAPT, ARHGEF4, VAV2, PPM1F, DAB2IP, APBB1, UBC, TNFSF12, AKAP13, COL18A1, HSF1, NFATC4, RASSF2, TFAP4, TRADD, AIFM2, CAPN10, NQO1, BCL2L1, ADAMTSL4, PLEKHG5, MAP3K11, PLEKHF1, TRIO, PPP3R1, BID, MAPK9, NLRP3, BBC3, BAD, TIAM1, MUL1, BAK1, PDGFRB, SMP…	ITGB1, BNIP3L, EEF1E1, ITGB3BP, WDR35, TIAM2, ARL6IP5, YWHAZ, DNAJA1, MAP3K20, RARB, DNM1L, CREB1, CARD8, TRIM13, PRNP, STK3, FBXW7, CYP1B1, GNA13, PRKRA, MAP2K4, PICALM, WNT5A, YWHAH, DYNLL2, SOS2, CDKN1B, ITGA6, SIRT1, MFF, ATF2, NCK1, EIF2S1, ING3, TGFB2, LATS2, PPID, SERINC3, CDC42, SENP1, NKX3-1, NET1, PDCD5, LYN, SHQ1, ECT2, STK4, REST, TNFAIP8, NCSTN, HSPD1, TFAP2A, GSDME, ATM, BCL6, ZC3H8…
GO:0006915	apoptotic process	1126	17	8.27	519	0.0025	0.1103	0.843678	1	A programmed cell death process which begins when a cell receives an internal (e.g. DNA damage) or external signal (e.g. an extracellular death ligand), and proceeds through a series of biochemical events (signaling pathway phase) which trigger an execution phase. The execution phase is the last step of an apoptotic process, and is typically characterized by rounding-up of the cell, retraction of…	1.53921	-1.81184	CRYAB, OSGIN1, APLP1, ADAM8, CARD9, TNFRSF19, AL928654.3, PIDD1, IKBKG, PREX1, EGLN2, NOTCH1, HTT, ELMO3, FGFR3, TGFB1, MEF2D, HMOX1, TSPO, TNFRSF25, SLC35F6, AKR1C3, BIN1, DAPK3, CTSH, HS1BP3, MTFP1, CLIP3, APOE, ATAD3A, GAS6, MADD, SCX, SCRIB, STK40, SIVA1, HYAL2, SPHK1, MAGED1, FLNA, RPL10, PTPA, THRA, CDK19, STK11, ZNF16, NME3, TICAM1, FAM129B, BCL7C, PACS2, GCLM, BRAT1, ARHGEF19, PLK3, MAPT,…	ITGB1, UBE2D3, BNIP3L, HIGD1A, EEF1E1, ITGB3BP, PPT1, DRAM2, CUL5, WDR35, CADM1, STAT1, NFE2L2, PHIP, PDCD10, TNFRSF11B, FMN2, PIK3R1, TIAM2, GJA1, ARL6IP5, RASSF3, YWHAZ, MRPS30, DNAJA1, MNAT1, ADNP, SLTM, MAP3K20, RARB, DNM1L, RFFL, HSPH1, EIF2AK2, NPM1, EBAG9, DDIAS, RTN4, GGCT, GPAM, MAP3K1, CREB1, FAIM, KRCC1, BUB1, CKAP2, TOPORS, CARD8, ZMYND11, TAF9, PDCD6IP, MTDH, NAE1, GULP1, RRM2B, STRA…
GO:0044248	cellular catabolic process	1340	19	9.84	345	0.00272	0.0688	0.843678	1	The chemical reactions and pathways resulting in the breakdown of substances, carried out by individual cells	1.08666	-1.67264	ADAM8, FTCD, PSMA6, IKBKG, ITGB4, SUFU, EXOSC6, SLC27A4, HTT, POP1, TGFB1, USP43, HMOX1, TSPO, DNASE1L2, NEIL1, ISG15, LZTS1, PDE4A, ALDH4A1, TRPC4AP, AKR1C3, ZSWIM9, DAPK3, CTSH, ABTB1, APOE, ANAPC2, FBXL15, RNH1, CSPG4, SREBF1, ATG2A, TOLLIP, SPHK1, PSMB10, RPL10, STK11, TICAM1, GGT7, ZKSCAN3, USP3, RPSA, PACS2, CPT1A, FBXL19, SNAP29, TST, PLK3, MAPT, LAMTOR4, KIF14, NTHL1, CTSV, NUDT18, GPC1, …	UBE2D3, BNIP3L, PSMD5, RNASEH2B, PPT1, DRAM2, UCHL5, CUL5, EIF3E, ERAP1, UBE2N, NFE2L2, ZMPSTE24, TENT2, SNX14, OPHN1, UBE2D2, CHMP2B, HSP90AA1, GPD2, PAIP1, GSPT1, FBXO8, NAPEPLD, USP38, SUMO1, DNM1L, RFFL, GSPT2, TOMM20, ABCD3, PSMD12, RPL39, TBL1XR1, VPS36, GLMN, PNRC2, RPL15, PSMA4, RNF20, RNF111, VCAN, CLOCK, ACADSB, NPEPPS, PSMC6, ADO, WDR75, UBE3A, USP14, CDC27, TOPORS, CNOT8, TATDN1, CDC2…
GO:0043066	negative regulation of apoptotic process	488	10	3.58	101	0.00274	0.0184	0.843678	1	Any process that stops, prevents, or reduces the frequency, rate or extent of cell death by apoptotic process	1.2181	-1.64446	CRYAB, ADAM8, PIDD1, NOTCH1, HTT, HMOX1, SLC35F6, CTSH, APOE, ATAD3A, GAS6, SCX, STK40, SPHK1, FLNA, RPL10, ZNF16, FAM129B, GCLM, PLK3, KIF14, TYRO3, UBC, XIAP, PTPN1, HRAS, CTTN, HSF1, CEBPB, HYOU1, MUC1, TRADD, NUAK2, NQO1, POR, NKX3-2, AMBRA1, BCL2L1, TMEM161A, CBL, CLN8, SH3RF1, PELI3, LRP1, PPARD, CLN3, SPHK2, ARHGAP10, UCN, MICAL1, ARHGDIA, WFS1, SMAD6, STAT5B, FLT3LG, BAG6, BID, HSPA1B, TS…	ITGB1, BNIP3L, HIGD1A, PPT1, NFE2L2, PHIP, PDCD10, FMN2, PIK3R1, YWHAZ, DNAJA1, MNAT1, ADNP, RARB, RFFL, HSPH1, EIF2AK2, NPM1, GPAM, FAIM, TOPORS, ZMYND11, TAF9, MTDH, RRM2B, STRADB, PRNP, RASA1, DKK1, KLHL20, TPT1, MAP2K4, ARL6IP1, IL1B, RHBDD1, ARF4, BECN1, WNT5A, RPS3A, CDKN1B, DAD1, ITGA6, SIRT1, TMF1, NOTCH2, PSMG2, ING2, PLAC8, URI1, SIN3A, HDAC2, MSH2, BIRC2, PSMD10, KRIT1, TRIAP1, API5, T…
GO:0048643	positive regulation of skeletal muscle t...	11	2	0.08	3	0.0028	0.0028	0.843678	1	Any process that activates, maintains or increases the rate of skeletal muscle tissue development	0.0786813	-0.0388406	FAM129B, GPC1	PRKAA1, RPS6KB1
GO:0042981	regulation of apoptotic process	847	14	6.22	788	0.00286	0.1846	0.843678	1	Any process that modulates the occurrence or rate of cell death by apoptotic process	1.42549	-1.74756	CRYAB, OSGIN1, ADAM8, CARD9, PIDD1, PREX1, EGLN2, NOTCH1, HTT, TGFB1, HMOX1, TSPO, TNFRSF25, SLC35F6, AKR1C3, BIN1, DAPK3, CTSH, HS1BP3, CLIP3, APOE, ATAD3A, GAS6, MADD, SCX, SCRIB, STK40, HYAL2, SPHK1, MAGED1, FLNA, RPL10, PTPA, THRA, CDK19, ZNF16, FAM129B, GCLM, ARHGEF19, PLK3, MAPT, KIF14, ARHGEF4, VAV2, PPM1F, DAB2IP, TYRO3, BCAR1, APBB1, UBC, ALX3, TNFSF12, CARD10, P4HB, AKAP13, XIAP, PTPN1,…	ITGB1, BNIP3L, HIGD1A, EEF1E1, ITGB3BP, PPT1, WDR35, STAT1, NFE2L2, PHIP, PDCD10, TNFRSF11B, FMN2, PIK3R1, TIAM2, ARL6IP5, RASSF3, YWHAZ, DNAJA1, MNAT1, ADNP, MAP3K20, RARB, DNM1L, RFFL, HSPH1, EIF2AK2, NPM1, RTN4, GPAM, CREB1, FAIM, TOPORS, CARD8, ZMYND11, TAF9, MTDH, NAE1, RRM2B, STRADB, PRNP, STK3, RASA1, GDF6, FBXW7, DKK1, CYP1B1, KLHL20, TCP1, GNA13, OMA1, PRKRA, TPT1, MAP2K4, ARL6IP1, IL1B,…
GO:0051092	positive regulation of NF-kappaB transcr...	82	4	0.6	4	0.00302	0.003	0.843678	1	Any process that activates or increases the frequency, rate or extent of activity of the transcription factor NF-kappaB	0.920226	-1.1375	ADAM8, PSMA6, PIDD1, IKBKG, TGFB1, SPHK1, TICAM1, TRAPPC9, UBC, TRADD, AMH, PRKD2, HSPA1B, NLRP3	TERF2IP, UBE2N, EIF2AK2, NPM1, CLOCK, TRIM13, MTDH, MAP3K7, IL1B, WNT5A, TAB2, MAP3K13, TRIM37, PRKD1, TLR4, PRKCI, TRAF6, TRIM52, PRDX3, TRIM8
GO:0010803	regulation of tumor necrosis factor-medi...	40	3	0.29	5	0.00307	0.0031	0.843678	1	Any process that modulates the rate or extent of the tumor necrosis factor-mediated signaling pathway. The tumor necrosis factor-mediated signaling pathway is the series of molecular signals generated as a consequence of tumor necrosis factor binding to a cell surface receptor	0.738947	-0.596263	IKBKG, SPPL2B, CLIP3, GAS6, MADD, SPHK1, UBC, TRADD, PELI3, TNFRSF1A, HSPA1B, HIPK1	ZNF675, RFFL, BIRC2, SPPL2A, TNFAIP3
GO:0043069	negative regulation of programmed cell d...	497	10	3.65	106	0.00313	0.0204	0.843678	1	Any process that stops, prevents, or reduces the frequency, rate or extent of programmed cell death, cell death resulting from activation of endogenous cellular processes	1.2181	-1.64446	CRYAB, ADAM8, PIDD1, NOTCH1, HTT, HMOX1, SLC35F6, CTSH, APOE, ATAD3A, GAS6, SCX, STK40, SPHK1, FLNA, RPL10, ZNF16, FAM129B, GCLM, PLK3, KIF14, TYRO3, UBC, XIAP, PTPN1, HRAS, CTTN, HSF1, CDSN, CEBPB, HYOU1, MUC1, TRADD, NUAK2, NQO1, POR, NKX3-2, AMBRA1, BCL2L1, TMEM161A, CBL, CLN8, SH3RF1, PELI3, LRP1, PPARD, CLN3, SPHK2, ARHGAP10, UCN, MICAL1, ARHGDIA, WFS1, SMAD6, STAT5B, FLT3LG, BAG6, BID, HSPA…	ITGB1, BNIP3L, HIGD1A, PPT1, NFE2L2, PHIP, PDCD10, FMN2, PIK3R1, YWHAZ, DNAJA1, MNAT1, ADNP, RARB, RFFL, HSPH1, EIF2AK2, NPM1, GPAM, FAIM, TOPORS, ZMYND11, TAF9, MTDH, RRM2B, STRADB, PRNP, RASA1, DKK1, KLHL20, TPT1, MAP2K4, ARL6IP1, IL1B, RHBDD1, ARF4, BECN1, WNT5A, RPS3A, CDKN1B, DAD1, ITGA6, SIRT1, TMF1, NOTCH2, MET, PSMG2, ING2, PLAC8, URI1, SIN3A, HDAC2, MSH2, BIRC2, PSMD10, KRIT1, TRIAP1, AP…
GO:0007219	Notch signaling pathway	83	4	0.61	6	0.00315	0.0032	0.843678	1	A series of molecular signals initiated by the binding of an extracellular ligand to the receptor Notch on the surface of a target cell, and ending with regulation of a downstream cellular process, e.g. transcription	0.806866	-1.02633	NEURL1B, NOTCH1, TGFB1, GDPD5, TBX2, RFNG, FAM129B, EGFL7, RPS19, UBC, MIB2, CBFA2T2, SLC35C2, HHEX, POFUT1, DTX3, EPN1, PSEN2, LFNG	IFT74, NOV, PDCD10, RBPJ, KAT2B, FBXW7, CDKN1B, NOTCH2, ZMIZ1, SYNJ2BP, BMP2K, NCSTN, BCL6, SNW1, CD46, EP300, ADAM10, NEPRO
GO:0006928	movement of cell or subcellular componen...	952	15	6.99	7	0.00315	0.0032	0.843678	1	The directed, self-propelled movement of a cellular component without the involvement of an external agent such as a transporter or a pore	1.31272	-1.72883	SPNS2, SEMA6C, ADAM8, TPGS1, BST2, TIE1, PREX1, SLC9B1, ARAP1, ITGB4, NPHP4, NOTCH1, HTT, ELMO3, TGFB1, HMOX1, LAMA2, CERS2, EFNB1, PPIL2, KIF13B, TSPO, SCN1B, AP3D1, CSF1, PGF, ZNF703, DAPK3, CTSH, SOCS7, CDC42BPB, APOE, PLXNB1, TRPM2, GAS6, CSPG4, SCRIB, KIFC3, NEO1, IGFBP5, HYAL2, SPHK1, FLNA, TRPM4, SLC7A11, BOC, FAM129B, BRAT1, CNIH2, MAPT, KIF14, POMGNT2, FSCN1, GPC1, HDAC5, SPECC1L, VAV2, …	ITGB1, CD58, WIPF1, ARPC5, WDR35, COL3A1, NFE2L2, IFT74, NOV, RPGR, PDCD10, OPHN1, FMN2, PDGFD, PIK3R1, CAPZA1, PHLDB2, GJA1, PFN2, DYNC1LI1, CPNE3, DNAJA1, SUMO1, RFFL, HSPB11, PDGFRA, RYK, RNF20, RTN4, CREB1, ICK, RAB6A, ITGA4, PALLD, MYLK, TNPO1, PTPRK, PSG1, CCNYL1, SPAG9, DLGAP5, IQGAP1, MCC, MATN2, CLIC4, AL049697.1, CYP1B1, GNA13, HAS2, EFNB2, RAB11A, EPHA4, IL1B, ASPM, ARF4, CD47, DPYSL2,…
GO:0043067	regulation of programmed cell death	858	14	6.3	825	0.00323	0.1972	0.843678	1	Any process that modulates the frequency, rate or extent of programmed cell death, cell death resulting from activation of endogenous cellular processes	1.42549	-1.74756	CRYAB, OSGIN1, ADAM8, CARD9, PIDD1, PREX1, EGLN2, NOTCH1, HTT, TGFB1, HMOX1, TSPO, TNFRSF25, SLC35F6, AKR1C3, BIN1, DAPK3, CTSH, HS1BP3, CLIP3, APOE, ATAD3A, GAS6, MADD, SCX, SCRIB, STK40, HYAL2, SPHK1, MAGED1, FLNA, RPL10, PTPA, THRA, CDK19, ZNF16, FAM129B, GCLM, ARHGEF19, PLK3, MAPT, KIF14, ARHGEF4, VAV2, PPM1F, DAB2IP, TYRO3, BCAR1, APBB1, UBC, ALX3, TNFSF12, CARD10, P4HB, AKAP13, XIAP, PTPN1,…	ITGB1, BNIP3L, HIGD1A, EEF1E1, ITGB3BP, PPT1, WDR35, STAT1, NFE2L2, PHIP, PDCD10, TNFRSF11B, FMN2, PIK3R1, TIAM2, ARL6IP5, RASSF3, YWHAZ, DNAJA1, MNAT1, ADNP, MAP3K20, RARB, DNM1L, RFFL, HSPH1, EIF2AK2, NPM1, RTN4, GPAM, CREB1, FAIM, TOPORS, CARD8, ZMYND11, TAF9, MTDH, NAE1, RRM2B, STRADB, PRNP, STK3, RASA1, GDF6, FBXW7, DKK1, CYP1B1, KLHL20, TCP1, GNA13, OMA1, PRKRA, TPT1, MAP2K4, ARL6IP1, IL1B,…
GO:0001921	positive regulation of receptor recyclin...	12	2	0.09	9	0.00334	0.0033	0.843678	1	Any process that activates or increases the frequency, rate or extent of receptor recycling	0.142725	-0.144781	ARAP1, SCRIB, ECE1	VAMP3
GO:0034383	low-density lipoprotein particle clearan...	12	2	0.09	10	0.00334	0.0033	0.843678	1	The process in which a low-density lipoprotein particle is removed from the blood via receptor-mediated endocytosis and its constituent parts degraded	0.474353	0.242489	HMOX1, CNPY2, LDLR, WASHC1, CSK, SCARB1
GO:0012501	programmed cell death	1159	17	8.51	619	0.0034	0.1327	0.843678	1	A process which begins when a cell receives an internal or external signal and activates a series of biochemical events (signaling pathway). The process ends with the death of the cell	1.53921	-1.81184	CRYAB, OSGIN1, APLP1, ADAM8, CARD9, TNFRSF19, AL928654.3, PIDD1, IKBKG, PREX1, EGLN2, NOTCH1, HTT, ELMO3, FGFR3, TGFB1, MEF2D, HMOX1, TSPO, TNFRSF25, SLC35F6, KRT81, AKR1C3, BIN1, DAPK3, CTSH, HS1BP3, MTFP1, CLIP3, APOE, ATAD3A, GAS6, MADD, SCX, SCRIB, STK40, SIVA1, HYAL2, SPHK1, MAGED1, FLNA, RPL10, PTPA, THRA, CDK19, STK11, ZNF16, NME3, TICAM1, FAM129B, BCL7C, PACS2, GCLM, BRAT1, ARHGEF19, PLK3…	ITGB1, UBE2D3, BNIP3L, HIGD1A, EEF1E1, ITGB3BP, PPT1, DRAM2, CUL5, WDR35, CADM1, STAT1, NFE2L2, PHIP, PDCD10, TNFRSF11B, FMN2, PIK3R1, TIAM2, GJA1, ARL6IP5, RASSF3, YWHAZ, MRPS30, DNAJA1, MNAT1, ADNP, SLTM, MAP3K20, RARB, DNM1L, RFFL, HSPH1, EIF2AK2, NPM1, EBAG9, DDIAS, RTN4, GGCT, GPAM, MAP3K1, CREB1, FAIM, KRCC1, BUB1, CKAP2, TOPORS, CARD8, ZMYND11, TAF9, PDCD6IP, MTDH, NAE1, GULP1, RRM2B, STRA…
GO:0000028	ribosomal small subunit assembly	13	2	0.1	11	0.00393	0.0039	0.843678	1	The aggregation, arrangement and bonding together of constituent RNAs and proteins to form the small ribosomal subunit	0.340611	0.0688615	RPSA, RPS19, RPS28, RPS10
GO:0071243	cellular response to arsenic-containing ...	13	2	0.1	12	0.00393	0.0039	0.843678	1	Any process that results in a change in state or activity of a cell (in terms of movement, secretion, enzyme production, gene expression, etc.) as a result of an arsenic stimulus from compounds containing arsenic, including arsenates, arsenites, and arsenides	0.238997	-0.00554166	HMOX1, HSF1
GO:0065009	regulation of molecular function	1713	22	12.58	1749	0.00403	0.6337	0.843678	1	Any process that modulates the frequency, rate or extent of a molecular function, an elemental biological activity occurring at the molecular level, such as catalysis or binding	1.25763	-1.95957	WDR81, NOXA1, ADAM8, BST2, LMTK3, LRP8, CCNK, PSMA6, PIDD1, PRKAR1B, IKBKG, WFIKKN1, PREX1, FZD8, CRTC1, ARAP1, STMN3, SUFU, RGS12, NOTCH1, HTT, FGFR3, TGFB1, HMOX1, MAPK11, SCN1B, WRAP53, SZT2, NEIL1, CSF1, SBF1, CTNNBIP1, CDK20, RGS3, CTSH, DENND4A, CBARP, RAPGEF1, SOCS7, GFI1, PKMYT1, GPSM1, GLIS2, APOE, PLXNB1, ANAPC2, RANGAP1, RNH1, GAS6, CSPG4, MADD, CDK9, SCRIB, PLEKHG4, HYAL2, SPHK1, MAGE…	ITGB1, ZNF675, FAM220A, CCNG1, ARRDC3, PSMD5, DCUN1D4, CAMK2N1, AGFG1, PPT1, PTGES3, UCHL5, WDR35, EIF3E, UTRN, TERF2IP, UBE2N, POT1, NETO2, RPGR, PDCD10, LINC02210-CRHR1, OPHN1, PDGFD, PIK3R1, PPP2R5E, TIAM2, GPRC5B, GJA1, DVL3, HSP90AA1, KDM5A, ARL6IP5, FBXO8, PFN2, NIFK, DNAJA1, PIBF1, MNAT1, SUMO1, ADNP, MAP3K20, DNM1L, RFFL, HSPH1, EIF2AK2, PSMD12, NPM1, DCUN1D5, ARPP19, ASAP2, MED13, PDGFRA…
GO:0051179	localization	3407	36	25.01	98	0.00408	0.0179	0.843678	1	Any process in which a cell, a substance, or a cellular entity, such as a protein complex or organelle, is transported to or maintained in a specific location	1.73589	-2.0633	CRYAB, SPNS2, SPP1, TSNARE1, TMEM38A, APLP1, ADAM8, TPGS1, BST2, AKAP10, TIE1, LRP8, PSMA6, IKBKG, RHOF, PREX1, WDR33, PPFIA3, TOM1, SLC9B1, IPO4, ARAP1, ITGB4, OSBPL5, PANX2, NEURL1B, SUFU, NPHP4, SLC27A4, NOTCH1, BORCS6, HTT, TSPAN10, ELMO3, SLC19A1, CROCC, SLC9A5, A1BG, TGFB1, HMOX1, LAMA2, MAPK11, TLN2, ABCB9, CERS2, SLC26A1, EFNB1, RAB4B-EGLN2, TRPV2, PPIL2, TAP1, KIF13B, TSPO, SCN1B, WRAP53…	ITGB1, YPEL5, CENPQ, GEM, CD58, UBE2D3, BNIP3L, TMEM184C, WIPF1, ARPC5, ATP5F1EP2, SLU7, NEDD1, PSMD5, DNAJC28, MTBP, AGFG1, PPT1, RHOQ, SLC39A6, CUL5, WDR35, KPNA3, CLVS1, UTRN, TERF2IP, EXOC5, IREB2, COL3A1, PEX3, CADM1, NFE2L2, XPR1, POT1, IFT74, SLC25A46, DCTN4, NOV, NETO2, RPGR, PDCD10, LINC02210-CRHR1, SNX14, OPHN1, TMEM167A, FMN2, PDGFD, PIK3R1, SRP19, NUSAP1, ARMC1, PHLDB2, GJA1, DVL3, CP…
GO:0050790	regulation of catalytic activity	1392	19	10.22	1869	0.0042	0.7572	0.843678	1	Any process that modulates the activity of an enzyme	1.25763	-1.89845	WDR81, NOXA1, ADAM8, BST2, LMTK3, LRP8, CCNK, PSMA6, PIDD1, PRKAR1B, IKBKG, WFIKKN1, PREX1, FZD8, ARAP1, STMN3, RGS12, NOTCH1, HTT, FGFR3, TGFB1, MAPK11, WRAP53, SZT2, NEIL1, CSF1, SBF1, CDK20, RGS3, CTSH, DENND4A, RAPGEF1, SOCS7, GFI1, PKMYT1, GPSM1, APOE, PLXNB1, ANAPC2, RANGAP1, RNH1, GAS6, CSPG4, MADD, SCRIB, PLEKHG4, HYAL2, MAGED1, PSMB10, ARHGEF10L, CHCHD10, PTPA, VPS9D1, PLEKHG3, STK11, PI…	ITGB1, ZNF675, CCNG1, ARRDC3, PSMD5, DCUN1D4, CAMK2N1, AGFG1, PPT1, PTGES3, UCHL5, WDR35, UBE2N, POT1, RPGR, PDCD10, LINC02210-CRHR1, OPHN1, PDGFD, PIK3R1, PPP2R5E, TIAM2, GPRC5B, DVL3, HSP90AA1, KDM5A, ARL6IP5, FBXO8, PFN2, NIFK, DNAJA1, PIBF1, MNAT1, SUMO1, ADNP, MAP3K20, DNM1L, RFFL, HSPH1, EIF2AK2, PSMD12, NPM1, DCUN1D5, ARPP19, ASAP2, PDGFRA, TRAPPC6B, DEPDC7, SNX13, PSMA4, PSMC6, PPP2R3C, A…
GO:0005977	glycogen metabolic process	45	3	0.33	13	0.0043	0.0043	0.843678	1	The chemical reactions and pathways involving glycogen, a polydisperse, highly branched glucan composed of chains of D-glucose residues in alpha-(1->4) glycosidic linkage, joined together by alpha-(1->6) glycosidic linkages	0.554353	-0.766654	STK40, C1QTNF2, PYGB, GAA, UBC, STBD1, PHKA2	UGP2, PPP1CC, AGL, CALM2, PPP1CB, GYG1, PPP1R2, PGM2
GO:0006073	cellular glucan metabolic process	45	3	0.33	2033	0.0043	1	0.843678	1	The chemical reactions and pathways involving glucans, polysaccharides consisting only of glucose residues	0.554353	-0.766654	STK40, C1QTNF2, PYGB, GAA, UBC, STBD1, PHKA2	UGP2, PPP1CC, AGL, CALM2, PPP1CB, GYG1, PPP1R2, PGM2
GO:0044042	glucan metabolic process	45	3	0.33	2034	0.0043	1	0.843678	1	The chemical reactions and pathways involving glucans, polysaccharides consisting only of glucose residues	0.554353	-0.766654	STK40, C1QTNF2, PYGB, GAA, UBC, STBD1, PHKA2	UGP2, PPP1CC, AGL, CALM2, PPP1CB, GYG1, PPP1R2, PGM2
GO:0001959	regulation of cytokine-mediated signalin...	92	4	0.68	1138	0.00456	0.308	0.843678	1	Any process that modulates the frequency, rate or extent of the cytokine mediated signaling pathway	0.834881	-1.06445	IKBKG, CSF1, SPPL2B, GFI1, PALM3, CLIP3, GAS6, MADD, SPHK1, NR1H2, UBC, PTPN1, TRADD, IRF3, CACTIN, IFNGR2, PELI3, TNFRSF1A, HSPA1B, IRF7, MUL1, AGPAT2, NLRC5, HIPK1, HSP90AB1	ZNF675, STAT1, SUMO1, RFFL, WNT5A, BIRC2, SPPL2A, JAK1, VRK2, IFNGR1, CD24, AXL, LSM14A, TRIM6, TNFAIP3, IL6
GO:0007584	response to nutrient	94	4	0.69	14	0.00492	0.0049	0.843678	1	Any process that results in a change in state or activity of a cell or an organism (in terms of movement, secretion, enzyme production, gene expression, etc.) as a result of a nutrient stimulus	0.95325	-1.09549	SPP1, SLC27A4, IGFBP2, TGFB1, HMOX1, TSPO, AKR1C3, GAS6, GCLM, MTHFR, HSF1, NQO1, POR, PPARD, AACS, SETDB1	BCHE, HAT1, TNFRSF11B, STC2, CDKN2B, AGL, BECN1, TRIM24, DAD1, ACSL4, SLC16A1, TYMS, EGFR, BRIP1, SNW1, ACSL3, TPCN2, GNPAT, GCLC, RPS6KB1
GO:0023051	regulation of signaling	1745	22	12.81	275	0.00508	0.0534	0.843678	1	Any process that modulates the frequency, rate or extent of a signaling process	1.33059	-1.86953	HTRA1, ADAM8, CARD9, TMEM65, TNFRSF19, BST2, LRP8, PSMA6, PIDD1, IKBKG, RHOF, PREX1, FZD8, PPFIA3, CRTC1, ARAP1, STMN3, SUFU, RGS12, NPHP4, RHOBTB2, NOTCH1, HTT, IGFBP2, FGFR3, TGFB1, HMOX1, LAMA2, MAPK11, SZT2, CSF1, GDPD5, LZTS1, CTNNBIP1, PDE4A, SLC35F6, MC1R, AKR1C3, ABCA7, RGS3, ZNF703, DAPK3, CTSH, RAPGEF1, SOCS7, SPPL2B, GFI1, PALM3, SYT11, GPSM1, GLIS2, CLIP3, APOE, PLXNB1, ANAPC2, FBXL15…	ITGB1, ZNF675, ARRDC3, SH3BGRL, PSMD5, EEF1E1, BCHE, DYRK1A, RHOQ, WDR35, TERF2IP, TOPBP1, COL3A1, BICC1, STAT1, UBE2N, NFE2L2, PHIP, C3orf58, NOV, NETO2, PDCD10, LINC02210-CRHR1, OPHN1, PDGFD, PIK3R1, TIAM2, GPRC5B, GJA1, DVL3, TAF5, ARL6IP5, FBXO8, PFN2, SNX3, YWHAZ, EIF2A, ATP2C1, TMEM33, DNAJA1, PIBF1, SUMO1, ADNP, MAP3K20, DNM1L, RFFL, HSPH1, EIF2AK2, PSMD12, TRIM33, MED13, PDGFRA, DEPDC7, S…
GO:0010656	negative regulation of muscle cell apopt...	15	2	0.11	15	0.00524	0.0052	0.843678	1	Any process that decreases the rate or frequency of muscle cell apoptotic process, a form of programmed cell death induced by external or internal signals that trigger the activity of proteolytic caspases whose actions dismantle a muscle cell and result in its death	0.280104	-0.218772	HMOX1, HSF1, AMBRA1	NFE2L2
GO:0051240	positive regulation of multicellular org...	715	12	5.25	1171	0.00527	0.3164	0.843678	1	Any process that activates or increases the frequency, rate or extent of an organismal process, any of the processes pertinent to the function of an organism above the cellular level; includes the integrated processes of tissues and organs	1.14331	-1.4882	SPP1, ADAM8, CARD9, LRP8, CRTC1, EXOSC6, NOTCH1, TGFB1, HMOX1, MAPK11, TRPV2, TSPO, SCN1B, AP3D1, CSF1, GDPD5, ISG15, PGF, CTNNBIP1, ABCA7, ZNF703, BIN1, CTSH, RAPGEF1, TBX2, WASF3, APOE, PLXNB1, ANAPC2, GAS6, SCX, SEMA7A, CDK9, HYAL2, SPHK1, MAGED1, FLNA, TRPM4, HLX, STK11, ZNF16, TICAM1, TKFC, FAM129B, KATNB1, MAPT, LRRC24, GPC1, NR1H2, PPM1F, DAB2IP, ACACB, ZNF335, BCAR1, ARHGAP35, RPS19, APBB…	CD58, ERAP1, CADM1, NFE2L2, ZBTB1, TBC1D23, PDGFD, PIK3R1, GPRC5B, PHLDB2, GJA1, MKL2, SNX3, PIBF1, ADNP, RARB, DNM1L, EIF2AK2, GLMN, RTN4, RBPJ, GPAM, PPP2R3C, CREB1, CARD8, MTDH, HPSE, WWTR1, SOCS5, SLC1A1, SPAG9, ATP11C, IQGAP1, GDF6, DKK1, LY96, SMAP1, ANKRD17, CYP1B1, MAP3K7, HAS2, EFNB2, PUM2, BASP1, RAB11A, EPHA4, IL1B, ASPM, WNT5A, OXTR, PUM1, SMURF2, LUM, SRGAP2C, ZFP36L1, POLR2K, B2M, S…
GO:0006112	energy reserve metabolic process	49	3	0.36	2035	0.00547	1	0.843678	1	The chemical reactions and pathways by which a cell derives energy from stored compounds such as fats or glycogen	0.554353	-0.775054	STK40, C1QTNF2, PYGB, GAA, UBC, STBD1, PHKA2	UGP2, PPP1CC, AGL, CALM2, PPP1CB, GYG1, PPP1R2, PGM2, GFPT1
GO:0060759	regulation of response to cytokine stimu...	97	4	0.71	1210	0.0055	0.3322	0.843678	1	Any process that modulates the rate, frequency, or extent of a response to cytokine stimulus	0.834881	-1.10333	IKBKG, CSF1, SPPL2B, GFI1, PALM3, CLIP3, GAS6, MADD, SPHK1, NR1H2, UBC, PTPN1, TRADD, IRF3, CACTIN, IFNGR2, PELI3, TNFRSF1A, HSPA1B, IRF7, MUL1, AGPAT2, NLRC5, HIPK1, HSP90AB1	ZNF675, STAT1, SUMO1, RFFL, TAF9, WNT5A, BIRC2, SPPL2A, JAK1, VRK2, IFNGR1, CD24, AXL, LSM14A, TRIM6, TNFAIP3, KLF4, IL6
GO:0034381	plasma lipoprotein particle clearance	16	2	0.12	2036	0.00596	1	0.843678	1	The process in which a lipoprotein particle is removed from the blood via receptor-mediated endocytosis and its constituent parts degraded	0.579568	0.0868774	HMOX1, CNPY2, APOE, LDLR, WASHC1, CSK, SCARB1
GO:0045933	positive regulation of muscle contractio...	16	2	0.12	2037	0.00596	1	0.843678	1	Any process that activates or increases the frequency, rate or extent of muscle contraction	0.394873	-0.152496	SPHK1, TRPM4, CTTN, UCN	OXTR, RGS2
GO:0008219	cell death	1224	17	8.99	787	0.00598	0.1831	0.843678	1	Any biological process that results in permanent cessation of all vital functions of a cell. A cell should be considered dead when any one of the following molecular or morphological criteria is met: (1) the cell has lost the integrity of its plasma membrane; (2) the cell, including its nucleus, has undergone complete fragmentation into discrete bodies (frequently referred to as \apoptotic bodies…	1.53921	-1.81184	CRYAB, OSGIN1, APLP1, ADAM8, CARD9, TNFRSF19, AL928654.3, PIDD1, IKBKG, PREX1, EGLN2, NOTCH1, HTT, ELMO3, FGFR3, TGFB1, MEF2D, HMOX1, TSPO, TNFRSF25, SLC35F6, KRT81, AKR1C3, BIN1, DAPK3, CTSH, PYCR1, HS1BP3, MTFP1, CLIP3, APOE, ATAD3A, GAS6, MADD, SCX, SCRIB, STK40, SIVA1, HYAL2, SPHK1, MAGED1, FLNA, RPL10, PTPA, THRA, CDK19, STK11, ZNF16, NME3, TICAM1, FAM129B, BCL7C, PACS2, GCLM, BRAT1, ARHGEF1…	ITGB1, UBE2D3, BNIP3L, HIGD1A, EEF1E1, ITGB3BP, PPT1, DRAM2, CUL5, WDR35, CADM1, STAT1, NFE2L2, PHIP, PDCD10, TNFRSF11B, FMN2, PIK3R1, TIAM2, GJA1, ARL6IP5, RASSF3, YWHAZ, MRPS30, DNAJA1, MNAT1, ADNP, SLTM, MAP3K20, RARB, DNM1L, RFFL, HSPH1, EIF2AK2, NPM1, EBAG9, DDIAS, RTN4, GGCT, GPAM, MAP3K1, CREB1, FAIM, KRCC1, BUB1, CKAP2, TOPORS, CARD8, ZMYND11, TAF9, TRIM13, PDCD6IP, MTDH, NAE1, GULP1, RRM…
GO:0090630	activation of GTPase activity	51	3	0.37	16	0.00612	0.0061	0.843678	1		0.608781	-0.623071	SCRIB, PLEKHG4, TBC1D22A, TBC1D14, TBC1D13, TBC1D22B, RALGAPA2, EVI5L, SYDE1, TBC1D2, TIAM1, SGSM2, TAX1BP3, EPHA1, TBC1D25, RCC2	WNT5A, EIF5, TBC1D12, TBCK, TBC1D8, ECT2, RABGAP1L, RASGRF1, PIP5K1A
GO:0040007	growth	547	10	4.02	879	0.00616	0.2137	0.843678	1	The increase in size or mass of an entire organism, a part of an organism or a cell	1.69437	-1.48754	CRYAB, HTRA1, IGFBP7, OSGIN1, SPP1, TMEM8B, BST2, EGLN2, ANKRD11, NOTCH1, IGFBP2, FGFR3, TGFB1, MAPK11, TRPV2, CSF1, ETNK2, SOCS7, TBX2, APOE, ATAD3A, PLXNB1, ANAPC2, GAS6, SEMA7A, STK40, IGFBP5, HYAL2, SPHK1, HLX, STK11, DGKD, PTCH1, CCDC85B, BRAT1, MAPT, KIF14, PNPT1, PPM1F, DAB2IP, ACACB, TKT, BCAR1, SLC25A25, APBB1, SIRT6, PTPRS, PLXNA1, DVL1, CTDP1, KMT2D, CTTN, HSF1, BAP1, TARBP2, AMH, SLC3…	ITGB1, PPT1, YEATS4, C3orf58, NOV, GJA1, GPD2, ADNP, RARB, TBL1XR1, EBAG9, NOP58, RTN4, RBPJ, BLZF1, CDKN2AIP, GPAM, UBE3A, CREB1, STC2, TAF9, WWTR1, SOCS5, PRKAR1A, EPC1, IQGAP1, NRK, STK3, SGMS1, KIAA1109, AREG, CLIC4, MAP2K4, BASP1, RAB11A, ASPM, DPYSL2, WNT5A, TNKS2, PTPN12, SLC9A6, ZFP36L1, CRIM1, CDKN1B, SIRT1, NOTCH2, ING2, PLAC8, CYFIP2, URI1, ZNF639, AGTR1, SBDS, PSMD10, EI24, VCL, CREG1…
GO:0051641	cellular localization	1773	22	13.02	99	0.00619	0.0184	0.843678	1	A localization process that takes place at the cellular level; as a result of a cellular localization process, a substance or cellular entity, such as a protein complex or organelle, is transported to, and/or maintained in, a specific location within or in the membrane of a cell	1.41535	-1.90257	CRYAB, TSNARE1, TPGS1, BST2, IKBKG, WDR33, PPFIA3, TOM1, IPO4, SUFU, BORCS6, HTT, TSPAN10, CROCC, TGFB1, HMOX1, TLN2, PPIL2, TAP1, KIF13B, TSPO, WRAP53, SZT2, AP3D1, CLUH, AKR1C3, ABCA7, SYTL3, BIN1, SIL1, SYT11, GLIS2, CLIP3, TAP2, APOE, LAT2, PEX6, TRPM2, RANGAP1, GAS6, RAB11FIP3, SCRIB, SREBF1, TOLLIP, DCTN5, HYAL2, SPHK1, SPPL3, EXOC3, FLNA, TRPM4, RPL10, SPIRE2, RAB11FIP5, THRA, STK11, PTCH1…	ITGB1, CENPQ, GEM, UBE2D3, BNIP3L, SLU7, NEDD1, MTBP, AGFG1, PPT1, RHOQ, WDR35, KPNA3, TERF2IP, PEX3, POT1, IFT74, DCTN4, NOV, RPGR, PDCD10, OPHN1, TMEM167A, FMN2, PIK3R1, SRP19, NUSAP1, DVL3, CPE, CHMP2B, HSP90AA1, PEX12, TRAM1, PFN2, SRP9, DYNC1LI1, SNX3, YWHAZ, GOLPH3L, TMEM33, DNAJA1, PIBF1, SUMO1, DNM1L, UGCG, TIMM17A, SEC22B, HSPH1, TOMM20, CCDC14, HSPB11, SNX2, NPM1, RPL39, AP1S2, TRAPPC6B…
GO:0007166	cell surface receptor signaling pathway	1338	18	9.82	756	0.00639	0.1702	0.843678	1	A series of molecular signals initiated by activation of a receptor on the surface of a cell. The pathway begins with binding of an extracellular ligand to a cell surface receptor, or for receptors that signal in the absence of a ligand, by ligand-withdrawal or the activity of a constitutively active receptor. The pathway ends with regulation of a downstream cellular process, e.g. transcription	1.37835	-1.90345	HTRA1, TSPAN9, ADAM11, LAG3, CARD9, TNFRSF19, BST2, LRP8, PSMA6, ADAMTS1, PIDD1, IKBKG, FZD8, ARAP1, ITGB4, NEURL1B, SUFU, NPHP4, NOTCH1, FAM83G, HTT, IGFBP2, TSPAN10, FGFR3, TGFB1, HMOX1, MAPK11, EFNB1, CSF1, GDPD5, TNFRSF25, ISG15, PGF, CTNNBIP1, CNPY2, ABCA7, ZNF703, DAPK3, RAPGEF1, SOCS7, SPPL2B, TBX2, GFI1, PALM3, GLIS2, CLIP3, APOE, PLXNB1, LAT2, FBXL15, GAS6, CSPG4, MADD, SCX, SEMA7A, SREB…	ITGB1, ZNF675, GEM, UBE2D3, WIPF1, ARPC5, PSMD5, RHOQ, CUL5, COL3A1, BICC1, STAT1, UBE2N, PHIP, IFT74, ZBTB33, NOV, NETO2, PDCD10, LINC02210-CRHR1, TNFRSF11B, PDGFD, PIK3R1, GPRC5B, UBE2D2, COL4A5, DVL3, CPE, HSP90AA1, GTF2F2, SNX3, CPNE3, SUMO1, RFFL, HSPB11, PSMD12, TRIM33, TBL1XR1, PDGFRA, RYK, PSMA4, RNF111, ZFYVE16, RTN4, RBPJ, C2CD5, PSMC6, MAP3K1, CREB1, TDP2, PRKACB, ITGA4, CDKN2B, ZMYND1…
GO:0044264	cellular polysaccharide metabolic proces...	52	3	0.38	2038	0.00646	1	0.843678	1	The chemical reactions and pathways involving polysaccharides, polymers of more than 10 monosaccharide residues joined by glycosidic linkages, as carried out by individual cells	0.630508	-0.821791	B3GNT3, STK40, C1QTNF2, PYGB, GAA, UBC, STBD1, PHKA2	UGP2, PPP1CC, AGL, HAS2, CALM2, PPP1CB, GYG1, PPP1R2, PGM2
GO:0048583	regulation of response to stimulus	2014	24	14.79	574	0.00671	0.1227	0.843678	1	Any process that modulates the frequency, rate or extent of a response to a stimulus. Response to stimulus is a change in state or activity of a cell or an organism (in terms of movement, secretion, enzyme production, gene expression, etc.) as a result of a stimulus	1.73252	-1.96051	CRYAB, SPNS2, HTRA1, SPP1, LAG3, ADAM8, CARD9, TNFRSF19, BST2, PSMA6, PIDD1, IKBKG, RHOF, PREX1, FZD8, ARAP1, STMN3, RTEL1, SUFU, RGS12, NPHP4, EXOSC6, RHOBTB2, NOTCH1, HTT, IGFBP2, FGFR3, TGFB1, HMOX1, MAPK11, CERS2, SZT2, SBNO2, CSF1, GDPD5, PGF, CTNNBIP1, PDE4A, SLC35F6, MC1R, AKR1C3, ABCA7, RGS3, ZNF703, DAPK3, CTSH, PYCR1, RAPGEF1, SOCS7, SPPL2B, GFI1, PALM3, SYT11, GPSM1, GLIS2, CLIP3, APOE…	ITGB1, ZNF675, ARRDC3, UBE2D3, SH3BGRL, WIPF1, ARPC5, PSMD5, EEF1E1, RNASEH2B, DYRK1A, PTGES3, RHOQ, WDR35, UTRN, TERF2IP, TOPBP1, COL3A1, BICC1, ERAP1, CADM1, STAT1, UBE2N, NFE2L2, PHIP, C3orf58, NOV, NETO2, PDCD10, ZBTB1, TBC1D23, OPHN1, PDGFD, PIK3R1, TIAM2, GPRC5B, UBE2D2, PHLDB2, GJA1, DVL3, TAF5, HSP90AA1, ARL6IP5, FBXO8, SNX3, YWHAZ, EIF2A, ATP2C1, TMEM33, DNAJA1, PIBF1, SUMO1, MAP3K20, DN…
GO:0001919	regulation of receptor recycling	17	2	0.12	2039	0.00672	1	0.843678	1	Any process that modulates the frequency, rate, or extent of receptor recycling	0.311181	-0.263032	ARAP1, SCRIB, ECE1	VAMP3
GO:0071392	cellular response to estradiol stimulus	17	2	0.12	18	0.00672	0.0067	0.843678	1	Any process that results in a change in state or activity of a cell (in terms of movement, secretion, enzyme production, gene expression, etc.) as a result of stimulus by estradiol, a C18 steroid hormone hydroxylated at C3 and C17 that acts as a potent estrogen	0.198177	-0.463787	ZNF703, HSF1	KIF18A, SRD5A1, CCNA2, EGFR, HNRNPD, IL6
GO:0034330	cell junction organization	163	5	1.2	19	0.00675	0.0068	0.843678	1	A process that is carried out at the cellular level which results in the assembly, arrangement of constituent parts, or disassembly of a cell junction. A cell junction is a specialized region of connection between two cells or between a cell and the extracellular matrix	0.893996	-1.08694	ITGB4, NPHP4, NPHP1, TGFB1, TLN2, ZNF703, DAPK3, RAPGEF1, KIFC3, FLNA, PARD6A, FBF1, FSCN1, PLEC, PPM1F, JUP, TBCD, LAMA5, CTTN, NECTIN1, CCM2, CSK, ACTN4, COL16A1, LSR, MPP5, MICALL2, FZD5, PKP3, ANG, HIPK1, ITGB3, FLNC, RCC2	CADM1, PHLDB2, GJA1, PDCD6IP, PTPRK, MTDH, IQGAP1, TJP1, RASSF8, ITGA6, NECTIN3, VCL, PKP2, TGFB2, RAP1B, ROCK1, CDC42, LAMA3, ECT2, PLEKHA7, S100A10, EPB41L3, CLASP2, PRKCI, PTK2, CTNND1, RAPGEF2, SLK, AC068234.1, TGFBR1, HEG1, LAMC2, CDH12, MACF1, PIP5K1A, GNPAT, DLC1, ACTB
GO:0006954	inflammatory response	233	6	1.71	140	0.00705	0.0258	0.843678	1	The immediate defensive reaction (by vertebrate tissue) to infection or injury caused by chemical or physical agents. The process is characterized by local vasodilation, extravasation of plasma into intercellular spaces and accumulation of white blood cells and macrophages	1.08899	-1.27802	SPP1, ADAM8, PSMA6, IKBKG, NOTCH1, TGFB1, HMOX1, SBNO2, CSF1, TNFRSF25, CTNNBIP1, APOE, SEMA7A, TOLLIP, HYAL2, SPHK1, CDK19, TICAM1, MAP2K3, HDAC5, DAB2IP, TYRO3, RPS19, LDLR, XIAP, GPR17, BCR, BAP1, GSDMD, RHBDD3, CEBPB, NFATC4, GPR68, BDKRB1, SLC7A2, SNAP23, PPARD, RELB, UCN, TNFRSF1A, CHID1, STAT5B, F12, IL17RC, IL17RA, IGFBP4, NLRP3, SCN9A, FANCA, HRH1, MAPKAPK2, PIK3CD, HYAL3, PER1, ATRN	NFE2L2, NOV, TNFRSF11B, TBC1D23, GPRC5B, GJA1, CLOCK, RBPJ, LIPA, SOCS5, PXK, LY96, IL1B, CD47, WNT5A, PROS1, AGTR1, BIRC2, SEH1L, VAMP7, AFAP1L2, SNX4, TBK1, NT5E, EGFR, LYN, AXL, ISL1, HSPD1, PRKD1, TLR4, BCL6, CD46, PBK, TNFAIP3, TRPV1, PLGRKT, PLSCR1, KLF4, PRCP, CD59, SERPINF1, ASH1L, IL6, GATA3, OSMR, POLB, C4BPB, NMI
GO:0051247	positive regulation of protein metabolic...	940	14	6.9	20	0.00729	0.0073	0.843678	1	Any process that activates or increases the frequency, rate or extent of the chemical reactions and pathways involving a protein	1.20434	-1.6219	ADAM8, CARD9, TNFRSF19, LRP8, CCNK, PSMA6, PIDD1, PRKAR1B, IKBKG, EGLN2, FZD8, FGFR3, TGFB1, HMOX1, MAPK11, CSF1, CDK20, CNPY2, ABCA7, CTSH, RAPGEF1, CLIP3, APOE, ANAPC2, GAS6, CSPG4, MADD, SEMA7A, CDK9, SREBF1, TOLLIP, SPHK1, MAGED1, SPPL3, PSMB10, PTPA, PXYLP1, STK11, TICAM1, MAPK12, BRAT1, S1PR2, PLK3, MAPT, KIF14, TMEM259, C1QTNF2, MAP2K3, NR1H2, PPM1F, DAB2IP, RNF166, AXIN1, CAMKK1, SEMA4C, …	ARRDC3, PSMD5, DCUN1D4, DYRK1A, WDR35, EIF3E, TERF2IP, UBE2N, NFE2L2, PDCD10, PDGFD, GPRC5B, GJA1, DVL3, ARL6IP5, PAIP1, PFN2, PIBF1, MNAT1, SUMO1, ADNP, MAP3K20, EED, SEC22B, HSPH1, EIF2AK2, PSMD12, NPM1, DCUN1D5, FAM129A, PDGFRA, GLMN, RYK, PSMA4, RNF20, RNF111, PSMC6, PPP2R3C, UBE3A, MAP3K1, PRKACB, CDC27, TOPORS, CARD8, CDC23, PKD2, MAP4K5, SOCS5, PRKAR1A, SPAG9, STRADB, PRNP, IQGAP1, NRK, ST…
GO:0014806	smooth muscle hyperplasia	1	1	0.01	21	0.00734	0.0073	0.843678	1	A process, occurring in smooth muscle, in which there is an increase in cell number by cell division, often leading to an increase in the size of an organ	0.941532	0.941532	HMOX1
GO:0015801	aromatic amino acid transport	1	1	0.01	2040	0.00734	1	0.843678	1	The directed movement of aromatic amino acids, amino acids with aromatic ring, into, out of or within a cell, or between cells, by means of some agent such as a transporter or pore	0.571607	0.571607	SLC3A2
GO:0015820	leucine transport	1	1	0.01	2041	0.00734	1	0.843678	1	The directed movement of leucine, 2-amino-4-methylpentanoic acid, into, out of or within a cell, or between cells, by means of some agent such as a transporter or pore	0.571607	0.571607	SLC3A2
GO:0015827	tryptophan transport	1	1	0.01	22	0.00734	0.0073	0.843678	1	The directed movement of tryptophan, 2-amino-3-(1H-indol-3-yl)propanoic acid, into, out of or within a cell, or between cells, by means of some agent such as a transporter or pore	0.571607	0.571607	SLC3A2
GO:0030037	actin filament reorganization involved i...	1	1	0.01	23	0.00734	0.0073	0.843678	1	The cell cycle process in which rearrangement of the spatial distribution of actin filaments and associated proteins occurs	1.02869	1.02869	ARAP1
GO:0030472	mitotic spindle organization in nucleus	1	1	0.01	24	0.00734	0.0073	0.843678	1	A process resulting in the assembly, arrangement of constituent parts, or disassembly of the microtubule spindle in the nucleus. The process occurs during a mitotic cell cycle and takes place at the cellular level	0.755587	0.755587	PTPA
GO:0032203	telomere formation via telomerase	1	1	0.01	25	0.00734	0.0073	0.843678	1	The addition of telomeric repeats to a non-telomeric double-stranded DNA end by telomerase	0.910997	0.910997	WRAP53
GO:0034337	RNA folding	1	1	0.01	26	0.00734	0.0073	0.843678	1	The process of assisting in the covalent and noncovalent assembly of single or multimeric RNAs into the correct tertiary structure	0.730603	0.730603	FAM129B
GO:0034395	regulation of transcription from RNA pol...	1	1	0.01	27	0.00734	0.0073	0.843678	1	Any process that modulates the frequency, rate or extent of transcription from an RNA polymerase II promoter in response to an iron stimulus	0.941532	0.941532	HMOX1
GO:0043305	negative regulation of mast cell degranu...	1	1	0.01	28	0.00734	0.0073	0.843678	1	Any process that stops, prevents, or reduces the rate of mast cell degranulation	0.941532	0.941532	HMOX1
GO:0044028	DNA hypomethylation	1	1	0.01	2042	0.00734	1	0.843678	1	An decrease in the epigenetic methylation of cytosine and adenosine residues in DNA	0.730603	0.730603	FAM129B
GO:0044029	hypomethylation of CpG island	1	1	0.01	29	0.00734	0.0073	0.843678	1	An decrease in the epigenetic methylation of cytosine and adenosine residues in a CpG island in DNA. CpG islands are genomic regions that contain a high frequency of the CG dinucleotide and are often associated with the transcription start site of genes	0.730603	0.730603	FAM129B
GO:0046521	sphingoid catabolic process	1	1	0.01	30	0.00734	0.0073	0.843678	1	The chemical reactions and pathways resulting in the breakdown of sphingoids, any of a class of compounds comprising sphinganine and its homologues and stereoisomers, and derivatives of these compounds	0.775411	0.775411	SPHK1
GO:0060265	positive regulation of respiratory burst...	1	1	0.01	31	0.00734	0.0073	0.843678	1	Any process that increases the rate, frequency or extent of a phase of elevated metabolic activity, during which oxygen consumption increases made as a defense response ; this leads to the production, by an NADH dependent system, of hydrogen peroxide (H2O2), superoxide anions and hydroxyl radicals	0.653523	0.653523	RPS19
GO:0060267	positive regulation of respiratory burst	1	1	0.01	2043	0.00734	1	0.843678	1	Any process that increases the rate frequency or extent of a phase of elevated metabolic activity, during which oxygen consumption increases; this leads to the production, by an NADH dependent system, of hydrogen peroxide (H2O2), superoxide anions and hydroxyl radicals	0.653523	0.653523	RPS19
GO:0060356	leucine import	1	1	0.01	32	0.00734	0.0073	0.843678	1	The directed movement of leucine into a cell or organelle	0.571607	0.571607	SLC3A2
GO:0061408	positive regulation of transcription fro...	1	1	0.01	33	0.00734	0.0073	0.843678	1	Any process that increases the frequency, rate or extent of transcription from an RNA polymerase II promoter as a result of a heat stimulus, a temperature stimulus above the optimal temperature for that organism	0.600954	0.600954	HSF1
GO:0061519	macrophage homeostasis	1	1	0.01	34	0.00734	0.0073	0.843678	1	The process of regulating the proliferation and elimination of macrophage cells such that the total number of myeloid cells within a whole or part of an organism is stable over time in the absence of an outside stimulus	0.596236	0.596236	BAP1
GO:0071105	response to interleukin-11	1	1	0.01	2044	0.00734	1	0.843678	1	Any process that results in a change in state or activity of a cell or an organism (in terms of movement, secretion, enzyme production, gene expression, etc.) as a result of an interleukin-11 stimulus	0.895537	0.895537	SBNO2
GO:0071348	cellular response to interleukin-11	1	1	0.01	35	0.00734	0.0073	0.843678	1	Any process that results in a change in state or activity of a cell (in terms of movement, secretion, enzyme production, gene expression, etc.) as a result of an interleukin-11 stimulus	0.895537	0.895537	SBNO2
GO:0090108	positive regulation of high-density lipo...	1	1	0.01	36	0.00734	0.0073	0.843678	1	Any process that increases the frequency, rate, or extent of high-density lipoprotein particle assembly. High-density lipoprotein particle assembly is the aggregation and arrangement of proteins and lipids to form a high-density lipoprotein particle	0.691602	0.691602	NR1H2
GO:0090187	positive regulation of pancreatic juice ...	1	1	0.01	37	0.00734	0.0073	0.843678	1	Any process that increases the rate, frequency or extent of pancreatic juice secretion, the regulated release of pancreatic juice by the exocrine pancreas into the upper part of the intestine	0.691602	0.691602	NR1H2
GO:0090340	positive regulation of secretion of lyso...	1	1	0.01	38	0.00734	0.0073	0.843678	1	Any process that increases the rate, frequency or extent of secretion of lysosomal enzymes, the controlled release of lysosomal enzymes by a cell	0.691602	0.691602	NR1H2
GO:0098968	neurotransmitter receptor transport post...	1	1	0.01	39	0.00734	0.0073	0.843678	1		0.795556	0.795556	SCRIB
GO:1900365	positive regulation of mRNA polyadenylat...	1	1	0.01	40	0.00734	0.0073	0.843678	1	Any process that activates or increases the frequency, rate or extent of mRNA polyadenylation	0.600954	0.600954	HSF1
GO:1904842	response to nitroglycerin	1	1	0.01	2045	0.00734	1	0.843678	1		0.600954	0.600954	HSF1
GO:1904843	cellular response to nitroglycerin	1	1	0.01	41	0.00734	0.0073	0.843678	1		0.600954	0.600954	HSF1
GO:1904844	response to L-glutamine	1	1	0.01	2046	0.00734	1	0.843678	1		0.600954	0.600954	HSF1
GO:1904845	cellular response to L-glutamine	1	1	0.01	42	0.00734	0.0073	0.843678	1		0.600954	0.600954	HSF1
GO:1990823	response to leukemia inhibitory factor	1	1	0.01	2047	0.00734	1	0.843678	1		0.895537	0.895537	SBNO2
GO:1990830	cellular response to leukemia inhibitory...	1	1	0.01	43	0.00734	0.0073	0.843678	1		0.895537	0.895537	SBNO2
GO:1990911	response to psychosocial stress	1	1	0.01	44	0.00734	0.0073	0.843678	1		0.600954	0.600954	HSF1
GO:0071276	cellular response to cadmium ion	18	2	0.13	45	0.00753	0.0075	0.851111	1	Any process that results in a change in state or activity of a cell (in terms of movement, secretion, enzyme production, gene expression, etc.) as a result of a cadmium (Cd) ion stimulus	0.467271	-0.243991	HMOX1, AKR1C3, HSF1, MT1F, MAPK9	SUMO1, EGFR, MAPK8
GO:0016049	cell growth	312	7	2.29	46	0.00762	0.0076	0.851111	1	The process in which a cell irreversibly increases in size over time by accretion and biosynthetic production of matter similar to that already present	1.64023	-1.39073	CRYAB, HTRA1, IGFBP7, OSGIN1, SPP1, BST2, EGLN2, IGFBP2, TGFB1, TRPV2, APOE, ATAD3A, PLXNB1, ANAPC2, SEMA7A, IGFBP5, HYAL2, SPHK1, STK11, DGKD, CCDC85B, BRAT1, MAPT, KIF14, BCAR1, APBB1, SIRT6, PTPRS, PLXNA1, DVL1, CTDP1, KMT2D, CTTN, BAP1, SLC3A2, BDKRB1, GNG4, PPARD, SEC61A1, CLSTN1, UCN, SIPA1, H3F3A, IGFBP4, HSPA1B, SESN2, TIAM1, MUL1, EIF4G1, ADAM15, CDK11B, ITGB3, EXTL3, EXOSC4	ITGB1, PPT1, NOV, GJA1, ADNP, EBAG9, NOP58, RTN4, BLZF1, CDKN2AIP, TAF9, SOCS5, IQGAP1, SGMS1, KIAA1109, MAP2K4, RAB11A, DPYSL2, WNT5A, SLC9A6, CRIM1, CDKN1B, SIRT1, NOTCH2, CYFIP2, URI1, ZNF639, AGTR1, PSMD10, EI24, VCL, ADIPOR1, DDX5, RB1, TGFB2, CSNK2A1, SYT1, SH3BP4, USP47, PDLIM5, TYMS, EGFR, EXOSC9, CDC42, CDC73, SDCBP, TBCK, NET1, SGK3, MEX3C, SMARCA2, IFRD1, JADE1, SPG11, ATP6V0E1, EPB41L…
GO:0048523	negative regulation of cellular process	2511	28	18.44	97	0.00766	0.0176	0.851111	1	Any process that stops, prevents, or reduces the frequency, rate or extent of a cellular process, any of those that are carried out at the cellular level, but are not necessarily restricted to a single cell. For example, cell communication occurs among more than one cell, but occurs at the cellular level	1.81046	-1.968	CRYAB, HTRA1, IGFBP7, OSGIN1, SPP1, WDR81, APLP1, LAG3, ADAM8, BST2, LMTK3, TIE1, LRP8, CCNK, PSMA6, ADAMTS1, PIDD1, PRKAR1B, IKBKG, WFIKKN1, KLF16, PREX1, FZD8, ARAP1, VILL, STMN3, RTEL1, SUFU, RGS12, NPHP4, HES6, NOTCH1, HTT, IGFBP2, TGFB1, HMOX1, MAPK11, CERS2, TSPO, SZT2, NEIL1, SBNO2, GDPD5, ISG15, LZTS1, ZNF219, CTNNBIP1, SLC35F6, AKR1C3, ABCA7, RGS3, ZNF703, BIN1, DAPK3, ZGLP1, CTSH, CBARP…	ITGB1, ZNF675, FAM220A, UBE2D3, BNIP3L, HIGD1A, PSMD5, CAMK2N1, EEF1E1, BCHE, RNASEH2B, MTBP, PPT1, DYRK1A, RHOQ, UCHL5, CUL5, WDR35, EIF3E, TERF2IP, TOPBP1, THRB, IREB2, COL3A1, BICC1, STAT1, NFE2L2, POT1, PHIP, IFT74, ZBTB33, PTBP3, HAT1, BAZ2A, NOV, PDCD10, ZBTB1, OPHN1, FMN2, PIK3R1, CAPZA1, ZNF655, PHLDB2, GJA1, DVL3, LRRC17, KDM5A, ZNF224, PFN2, SRP9, DYNC1LI1, SNX3, YWHAZ, NIFK, DNAJA1, PI…
GO:0046700	heterocycle catabolic process	314	7	2.31	47	0.00789	0.0079	0.862366	1	The chemical reactions and pathways resulting in the breakdown of heterocyclic compounds, those with a cyclic molecular structure and at least two different atoms in the ring (or rings)	0.924494	-1.30825	FTCD, EXOSC6, POP1, HMOX1, DNASE1L2, NEIL1, PDE4A, ALDH4A1, RNH1, RPL10, RPSA, NTHL1, NUDT18, PNPT1, DNASE1, RPS19, ZHX2, HSF1, SLC3A2, UPF1, SKIV2L, DHX34, ITPA, RPS28, RPL31, RPLP2, TNKS1BP1, RPS10, HSPA1B, PKP3, SECISBP2, EDC3, EIF4G1, RPS29, RPS21, SAMHD1, RPS5, RPL37A, RPL13, RPL18, AC022384.1, EXOSC4, LSM7, ENTPD4	RNASEH2B, EIF3E, TENT2, PAIP1, GSPT1, GSPT2, RPL39, PNRC2, RPL15, CNOT8, TATDN1, RC3H1, SSB, DIS3, RPL36A, HPRT1, UPF2, MTREX, LSM1, RPS3A, RPL9, HNRNPR, ZFP36L1, CNOT2, EIF4B, HNMT, EIF4A2, DDX5, CNOT1, EXOSC3, RPL17, TTC37, PABPC1, LRPPRC, NT5E, CNOT4, PAN3, EXOSC9, PPP2R2A, TOB1, MBD4, HBS1L, APOBEC3C, TDG, PPP1R8, CSDE1, NUDT9, CNOT6, ZC3HAV1, HNRNPD, ATM, PATL1, DCP2, UNG, NUDT15, SUPV3L1, C…
GO:0050777	negative regulation of immune response	56	3	0.41	2048	0.00794	1	0.862366	1	Any process that stops, prevents, or reduces the frequency, rate or extent of the immune response, the immunological reaction of an organism to an immunogenic stimulus	0.771306	-0.737426	BST2, TGFB1, HMOX1, HLX, NR1H2, TYRO3, RPS19, GPR17, BCR, CACTIN, IL27RA, MUL1, NLRC5	COL3A1, SOCS5, RC3H1, TGFB2, LYN, BCL6, CD46, THOC1, TNFAIP3, CD59, C4BPB, NMI
GO:0044270	cellular nitrogen compound catabolic pro...	315	7	2.31	48	0.00802	0.008	0.862366	1	The chemical reactions and pathways resulting in the breakdown of organic and inorganic nitrogenous compounds	0.911168	-1.30825	FTCD, EXOSC6, POP1, HMOX1, DNASE1L2, NEIL1, PDE4A, RNH1, RPL10, RPSA, TST, NTHL1, NUDT18, PNPT1, DNASE1, RPS19, ZHX2, HSF1, MPST, SLC3A2, POR, UPF1, SKIV2L, DHX34, ITPA, RPS28, RPL31, RPLP2, TNKS1BP1, RPS10, HSPA1B, PKP3, SECISBP2, EDC3, EIF4G1, RPS29, RPS21, SAMHD1, RPS5, RPL37A, RPL13, RPL18, AC022384.1, EXOSC4, LSM7, ENTPD4	RNASEH2B, EIF3E, TENT2, PAIP1, GSPT1, GSPT2, RPL39, PNRC2, RPL15, CNOT8, TATDN1, RC3H1, SSB, DIS3, RPL36A, HPRT1, UPF2, MTREX, LSM1, RPS3A, RPL9, HNRNPR, ZFP36L1, CNOT2, EIF4B, HNMT, EIF4A2, DDX5, CNOT1, EXOSC3, RPL17, TTC37, PABPC1, LRPPRC, NT5E, CNOT4, PAN3, EXOSC9, PPP2R2A, TOB1, MBD4, HBS1L, APOBEC3C, TDG, PPP1R8, CSDE1, NUDT9, CNOT6, ZC3HAV1, HNRNPD, ATM, PATL1, DCP2, UNG, NUDT15, SUPV3L1, C…
GO:0006940	regulation of smooth muscle contraction	19	2	0.14	2049	0.00838	1	0.882105	1	Any process that modulates the frequency, rate or extent of smooth muscle contraction	0.272636	-0.341183	DAPK3, SPHK1, CTTN	OXTR, RGS2
GO:0045742	positive regulation of epidermal growth ...	19	2	0.14	49	0.00838	0.0084	0.882105	1	Any process that activates or increases the frequency, rate or extent of epidermal growth factor receptor signaling pathway activity	0.460381	-0.120462	ARAP1, UBC, CBL, PDE6G	FBXW7, AFAP1L2
GO:0009966	regulation of signal transduction	1598	20	11.73	299	0.0087	0.0575	0.903086	1	Any process that modulates the frequency, rate or extent of signal transduction	1.29768	-1.8581	HTRA1, ADAM8, CARD9, TNFRSF19, BST2, PSMA6, PIDD1, IKBKG, RHOF, PREX1, FZD8, ARAP1, STMN3, SUFU, RGS12, NPHP4, RHOBTB2, NOTCH1, HTT, IGFBP2, FGFR3, TGFB1, HMOX1, MAPK11, SZT2, CSF1, GDPD5, CTNNBIP1, PDE4A, SLC35F6, MC1R, AKR1C3, ABCA7, RGS3, ZNF703, DAPK3, CTSH, RAPGEF1, SOCS7, SPPL2B, GFI1, PALM3, GPSM1, GLIS2, CLIP3, APOE, PLXNB1, FBXL15, GAS6, CSPG4, MADD, SEMA7A, STK40, ATRIP, NEO1, IGFBP5, P…	ITGB1, ZNF675, ARRDC3, SH3BGRL, PSMD5, EEF1E1, DYRK1A, RHOQ, WDR35, TERF2IP, TOPBP1, COL3A1, BICC1, STAT1, UBE2N, NFE2L2, PHIP, C3orf58, NOV, NETO2, PDCD10, OPHN1, PDGFD, PIK3R1, TIAM2, GPRC5B, GJA1, DVL3, TAF5, ARL6IP5, FBXO8, SNX3, YWHAZ, EIF2A, ATP2C1, TMEM33, DNAJA1, PIBF1, SUMO1, MAP3K20, DNM1L, RFFL, HSPH1, EIF2AK2, PSMD12, TRIM33, MED13, PDGFRA, DEPDC7, SNX13, RYK, PSMA4, RNF111, CLOCK, RT…
GO:0019439	aromatic compound catabolic process	323	7	2.37	50	0.00915	0.0091	0.903086	1	The chemical reactions and pathways resulting in the breakdown of aromatic compounds, any substance containing an aromatic carbon ring	0.911168	-1.30825	FTCD, EXOSC6, POP1, HMOX1, DNASE1L2, NEIL1, PDE4A, RNH1, RPL10, RPSA, NTHL1, NUDT18, PNPT1, DNASE1, RPS19, ZHX2, HSF1, SLC3A2, UPF1, SKIV2L, DHX34, ITPA, RPS28, RPL31, RPLP2, TNKS1BP1, RPS10, HSPA1B, PKP3, SECISBP2, EDC3, EIF4G1, RPS29, RPS21, SAMHD1, RPS5, RPL37A, RPL13, RPL18, AC022384.1, EXOSC4, LSM7, ENTPD4	RNASEH2B, EIF3E, TENT2, PAIP1, GSPT1, GSPT2, RPL39, PNRC2, RPL15, CNOT8, TATDN1, RC3H1, SSB, DIS3, RPL36A, HPRT1, UPF2, MTREX, LSM1, RPS3A, RPL9, HNRNPR, ZFP36L1, CNOT2, EIF4B, HNMT, EIF4A2, DDX5, CNOT1, EXOSC3, RPL17, TTC37, PABPC1, LRPPRC, NT5E, CNOT4, PAN3, EXOSC9, PPP2R2A, PON2, TOB1, MBD4, HBS1L, APOBEC3C, TDG, PPP1R8, CSDE1, NUDT9, CNOT6, ZC3HAV1, HNRNPD, ATM, PATL1, DCP2, UNG, NUDT15, SUPV…
GO:0005976	polysaccharide metabolic process	59	3	0.43	2050	0.00917	1	0.903086	1	The chemical reactions and pathways involving a polysaccharide, a polymer of many (typically more than 10) monosaccharide residues linked glycosidically	0.688811	-0.821947	B3GNT3, TGFB1, STK40, C1QTNF2, PYGB, GAA, UBC, STBD1, PHKA2	UGP2, PPP1CC, AGL, HAS2, CALM2, PPP1CB, GYG1, PPP1R2, PGM2
GO:0010646	regulation of cell communication	1719	21	12.62	277	0.00924	0.0566	0.903086	1	Any process that modulates the frequency, rate or extent of cell communication. Cell communication is the process that mediates interactions between a cell and its surroundings. Encompasses interactions such as signaling or attachment between one cell and another cell, between a cell and an extracellular matrix, or between a cell and any other aspect of its environment	1.31144	-1.86953	HTRA1, ADAM8, CARD9, TNFRSF19, BST2, LRP8, PSMA6, PIDD1, IKBKG, RHOF, PREX1, FZD8, PPFIA3, CRTC1, ARAP1, STMN3, SUFU, RGS12, NPHP4, RHOBTB2, NOTCH1, HTT, IGFBP2, FGFR3, TGFB1, HMOX1, LAMA2, MAPK11, SZT2, CSF1, GDPD5, LZTS1, CTNNBIP1, PDE4A, SLC35F6, MC1R, AKR1C3, ABCA7, RGS3, ZNF703, DAPK3, CTSH, RAPGEF1, SOCS7, SPPL2B, GFI1, PALM3, SYT11, GPSM1, GLIS2, CLIP3, APOE, PLXNB1, ANAPC2, FBXL15, GAS6, …	ITGB1, ZNF675, ARRDC3, SH3BGRL, PSMD5, EEF1E1, BCHE, DYRK1A, RHOQ, WDR35, TERF2IP, TOPBP1, COL3A1, BICC1, STAT1, UBE2N, NFE2L2, PHIP, C3orf58, NOV, NETO2, PDCD10, LINC02210-CRHR1, OPHN1, PDGFD, PIK3R1, TIAM2, GPRC5B, GJA1, DVL3, TAF5, ARL6IP5, FBXO8, PFN2, SNX3, YWHAZ, EIF2A, ATP2C1, TMEM33, DNAJA1, PIBF1, SUMO1, ADNP, MAP3K20, DNM1L, RFFL, HSPH1, EIF2AK2, PSMD12, TRIM33, MED13, PDGFRA, DEPDC7, S…
GO:0045824	negative regulation of innate immune res...	20	2	0.15	51	0.00926	0.0093	0.903086	1	Any process that stops, prevents, or reduces the frequency, rate or extent of the innate immune response	0.486338	-0.219885	NR1H2, TYRO3, RPS19, CACTIN, MUL1, NLRC5	TNFAIP3, NMI
GO:0009987	cellular process	8244	65	60.53	351	0.00956	0.07	0.903086	1	Any process that is carried out at the cellular level, but not necessarily restricted to a single cell. For example, cell communication occurs among more than one cell, but occurs at the cellular level	1.97482	-2.19641	CRYAB, SPNS2, HTRA1, IGFBP7, OSGIN1, SPP1, TSNARE1, TMEM38A, TMX1, SEMA6C, ZNF512B, TSPAN9, WDR81, APLP1, ADAM11, LAG3, TMEM8B, NOXA1, ADAM8, CARD9, TPGS1, TNFRSF19, BST2, AKAP10, FTCD, ZNF628, LMTK3, AL928654.3, TIE1, LRP8, CCNK, SEMA6B, PSMA6, ZBTB34, ADAMTS1, ZNF341, TUBB2A, PIDD1, PRKAR1B, IKBKG, WFIKKN1, ADCK5, B3GNT3, PHC1, RHOF, ASPHD1, KLF16, PREX1, BRF1, EGLN2, REC8, FZD8, IBA57, WDR33, …	ITGB1, YPEL5, ZNF675, FAM220A, ZNF138, CENPQ, KLF3, CCNG1, GEM, CD58, ARRDC3, UBE2D3, ZNF181, EXTL2, SH3BGRL, BNIP3L, ELOVL7, MINPP1, ENTPD7, HIGD1A, PFDN4, WIPF1, ARPC5, SNRK, ATP5F1EP2, SLU7, RPF1, NEDD1, PSMD5, ZNF441, DCUN1D4, CAMK2N1, EEF1E1, ITGB3BP, CETN2, LRRCC1, EIF3M, PPCS, PLPP5, BCHE, DNAJC28, ZNF83, RNASEH2B, MTBP, PIN4, KLHL7, AGFG1, ACTR6, BCAS2, PPT1, PGM3, DYRK1A, PTGES3, ALKBH8,…
GO:0045765	regulation of angiogenesis	115	4	0.84	52	0.00996	0.01	0.903086	1	Any process that modulates the frequency, rate or extent of angiogenesis	0.853779	-1.12367	TIE1, NOTCH1, HMOX1, PGF, CTSH, RNH1, SPHK1, FAM129B, HDAC5, DAB2IP, SIRT6, TNFSF12, HHEX, PRKD2, ADGRB2, CD34, FOXO4, ENG, EPHA1, HIPK1, RUNX1	ERAP1, STAT1, NFE2L2, PDCD10, MTDH, CYP1B1, IL1B, WNT5A, SIRT1, DDAH1, KRIT1, ROCK1, JAK1, FGF2, SYNJ2BP, ISL1, PRKD1, ANXA3, SEMA5A, CCBE1, TNFAIP3, EGLN1, KLF4, EMP2, SERPINF1, IL6, RGCC
GO:1902533	positive regulation of intracellular sig...	498	9	3.66	53	0.01006	0.0101	0.903086	1	Any process that activates or increases the frequency, rate or extent of intracellular signal transduction	1.12781	-1.45143	ADAM8, CARD9, TNFRSF19, BST2, IKBKG, FZD8, NOTCH1, HTT, FGFR3, TGFB1, HMOX1, MAPK11, CSF1, MC1R, AKR1C3, ABCA7, RAPGEF1, PLXNB1, GAS6, CSPG4, MADD, SEMA7A, IGFBP5, SPHK1, MAGED1, SPPL3, FLNA, S100A4, TICAM1, JPH2, S1PR2, LAMTOR4, C1QTNF2, MAP2K3, DAB2IP, AXIN1, SEMA4C, UBC, TELO2, CARD10, AKAP13, MIB2, PTPN1, GPR17, HRAS, HSF1, CCDC22, WDR24, MAPK8IP3, RASSF2, TRADD, IRF3, CSK, BCL2L1, ACTN4, DBN…	EEF1E1, TERF2IP, COL3A1, UBE2N, PDCD10, PDGFD, GPRC5B, GJA1, DVL3, ARL6IP5, ATP2C1, PIBF1, MAP3K20, DNM1L, EIF2AK2, PDGFRA, RYK, RTN4, UBE3A, MAP3K1, TRIM13, MTDH, PKD2, HPSE, MAP4K5, SPAG9, RC3H1, IQGAP1, NRK, STK3, GDF6, MAP4K3, FBXW7, GOLT1B, ANKRD17, CYP1B1, MAP3K7, PRKRA, PUM2, MAP2K4, EPHA4, IL1B, BECN1, WNT5A, C18orf32, TAOK3, PUM1, TAB2, FKBP1A, COPS8, SOS2, CALM2, SIRT1, SLC20A1, NOTCH2,…
GO:0000027	ribosomal large subunit assembly	21	2	0.15	54	0.01019	0.0102	0.903086	1	The aggregation, arrangement and bonding together of constituent RNAs and proteins to form the large ribosomal subunit	0.350733	-0.507659	RPL10, DDX28, DHX30, NOP53	RPF1, BRIX1, FASTKD2, RPF2
GO:1901186	positive regulation of ERBB signaling pa...	21	2	0.15	2051	0.01019	1	0.903086	1	Any process that activates or increases the frequency, rate or extent of ERBB signaling pathway	0.460381	-0.389549	ARAP1, UBC, CBL, PDE6G	RTN4, RBPJ, FBXW7, AFAP1L2
GO:0072594	establishment of protein localization to...	500	9	3.67	141	0.01032	0.0265	0.903086	1	The directed movement of a protein to a specific location on or in an organelle. Encompasses establishment of localization in the membrane or lumen of a membrane-bounded organelle	0.915642	-1.53167	IPO4, SUFU, TSPAN10, TGFB1, TSPO, WRAP53, AP3D1, AKR1C3, PEX6, GAS6, SCRIB, SREBF1, HYAL2, SPHK1, SPPL3, FLNA, RPL10, THRA, RPSA, DNLZ, TIMM44, MAPT, TSPAN17, PEX16, DAB2IP, JUP, ZDHHC8, RPS19, STIMATE, BAP1, CCDC22, NAGPA, VTI1A, PMM1, RPS28, RPL31, TOMM5, IFT122, SEC61A1, PPP3R1, RPLP2, KPNA6, UBE2J2, RPS10, MICALL2, FZD5, SELENOI, MTX1, BID, TNPO2, NLRP3, BAD, PMPCA, KAT2A, RPS29, RPS21, LEPRO…	UBE2D3, BNIP3L, KPNA3, PEX3, POT1, NOV, PIK3R1, SRP19, HSP90AA1, PEX12, SRP9, YWHAZ, DNAJA1, UGCG, TIMM17A, HSPH1, TOMM20, RPL39, VPS36, RPL15, ZFYVE16, RAB10, NPEPPS, WDR75, NUP35, RAB6A, TRNT1, TNPO1, PKD2, WWTR1, FBXW7, G3BP2, CSNK2A2, NUP54, TCP1, KPNA4, RANBP6, RPL36A, RAB11A, IL1B, YWHAH, RPS3A, RPL9, DYNLL2, CALM2, SIRT1, TIMM9, MFF, HNMT, SRP54, NCOA4, PSMD10, SRP14, SEC63, RAB7A, PEX2, V…
GO:0023056	positive regulation of signaling	879	13	6.45	353	0.0104	0.0705	0.903086	1	Any process that activates, maintains or increases the frequency, rate or extent of a signaling process	1.18536	-1.64965	ADAM8, CARD9, TNFRSF19, BST2, PSMA6, PIDD1, IKBKG, FZD8, CRTC1, ARAP1, NOTCH1, HTT, FGFR3, TGFB1, HMOX1, LAMA2, MAPK11, CSF1, MC1R, AKR1C3, ABCA7, DAPK3, CTSH, RAPGEF1, GFI1, APOE, PLXNB1, FBXL15, GAS6, CSPG4, MADD, SEMA7A, SCRIB, NEO1, IGFBP5, HYAL2, SPHK1, MAGED1, SPPL3, FLNA, PSMB10, TRPM4, S100A4, STK11, TICAM1, RFNG, JPH2, S1PR2, LAMTOR4, C1QTNF2, MAP2K3, DAB2IP, JUP, AXIN1, SEMA4C, UBC, TEL…	ARRDC3, SH3BGRL, PSMD5, EEF1E1, WDR35, TERF2IP, COL3A1, UBE2N, PHIP, NOV, PDCD10, PDGFD, PIK3R1, GPRC5B, GJA1, DVL3, ARL6IP5, YWHAZ, EIF2A, ATP2C1, TMEM33, PIBF1, MAP3K20, DNM1L, EIF2AK2, PSMD12, PDGFRA, RYK, PSMA4, RNF111, RTN4, RBPJ, CDKN2AIP, PSMC6, UBE3A, MAP3K1, CREB1, CDKN2B, TRIM13, MTDH, PKD2, HPSE, MAP4K5, SPAG9, RC3H1, PRNP, IQGAP1, NRK, STK3, GDF6, MAP4K3, FBXW7, PSMA1, LY96, GOLT1B, A…
GO:1901361	organic cyclic compound catabolic proces...	332	7	2.44	55	0.01055	0.0105	0.903086	1	The chemical reactions and pathways resulting in the breakdown of organic cyclic compound	1.01952	-1.34011	SPP1, FTCD, EXOSC6, POP1, HMOX1, DNASE1L2, NEIL1, PDE4A, ALDH4A1, APOE, RNH1, RPL10, RPSA, NTHL1, NUDT18, PNPT1, DNASE1, RPS19, ZHX2, HSF1, SLC3A2, UPF1, HSD17B14, SKIV2L, DHX34, ITPA, RPS28, RPL31, SNX17, RPLP2, TNKS1BP1, RPS10, HSPA1B, PKP3, SECISBP2, EDC3, EIF4G1, RPS29, RPS21, SCARB1, SAMHD1, RPS5, RPL37A, RPL13, RPL18, AC022384.1, EXOSC4, LSM7, ENTPD4	RNASEH2B, EIF3E, TENT2, HSD17B11, PAIP1, GSPT1, GSPT2, RPL39, PNRC2, RPL15, CNOT8, TATDN1, RC3H1, SSB, DIS3, RPL36A, HPRT1, UPF2, MTREX, LSM1, YWHAH, RPS3A, RPL9, HNRNPR, ZFP36L1, CNOT2, EIF4B, HNMT, EIF4A2, DDX5, CNOT1, EXOSC3, RPL17, TTC37, PABPC1, LRPPRC, NT5E, CNOT4, PAN3, EXOSC9, PPP2R2A, TOB1, MBD4, HBS1L, APOBEC3C, TDG, PPP1R8, CSDE1, NUDT9, CNOT6, ZC3HAV1, HNRNPD, ATM, PATL1, DCP2, UNG, N…
GO:0043406	positive regulation of MAP kinase activi...	118	4	0.87	56	0.01087	0.0109	0.903086	1	Any process that activates or increases the frequency, rate or extent of MAP kinase activity	0.919047	-1.17316	ADAM8, IKBKG, FZD8, TGFB1, MAPK11, CSPG4, MADD, MAGED1, S1PR2, C1QTNF2, MAP2K3, DAB2IP, AXIN1, UBC, AKAP13, PTPN1, HRAS, MAPK8IP3, CSK, DBNL, PDE6G, MAP3K11, FZD5, TIAM1, MUL1, PDGFRB, AVPI1, MAP3K10, MAP3K6, MAPKAPK2	UBE2N, PDCD10, PDGFD, DVL3, MAP3K20, MAP4K5, SPAG9, IQGAP1, MAP3K7, MAP2K4, EPHA4, IL1B, WNT5A, TAOK3, TAB2, HACD3, FGF2, EGFR, CD24, IQGAP3, TLR4, TRAF6, MAP4K2, ERCC6, PRKAA1, PDGFC, LPAR1
GO:0048870	cell motility	689	11	5.06	57	0.01092	0.0109	0.903086	1	Any process involved in the controlled self-propelled movement of a cell that results in translocation of the cell from one place to another	1.25635	-1.65456	SPNS2, ADAM8, TPGS1, BST2, TIE1, PREX1, SLC9B1, ITGB4, NPHP4, NOTCH1, ELMO3, TGFB1, HMOX1, LAMA2, CERS2, EFNB1, PPIL2, TSPO, CSF1, PGF, ZNF703, DAPK3, CTSH, SOCS7, CDC42BPB, APOE, PLXNB1, TRPM2, GAS6, CSPG4, SCRIB, IGFBP5, HYAL2, SPHK1, FLNA, TRPM4, SLC7A11, BRAT1, KIF14, POMGNT2, FSCN1, GPC1, HDAC5, SPECC1L, VAV2, PPM1F, DAB2IP, JUP, TYRO3, SUN2, BCAR1, ARHGAP35, SEMA4C, RPS19, PLEKHO1, SDC3, TN…	ITGB1, CD58, ARPC5, COL3A1, NFE2L2, NOV, PDCD10, OPHN1, PDGFD, PIK3R1, PHLDB2, PFN2, CPNE3, DNAJA1, RFFL, PDGFRA, RNF20, RTN4, ITGA4, PALLD, MYLK, PTPRK, PSG1, CCNYL1, SPAG9, IQGAP1, MCC, MATN2, CLIC4, CYP1B1, GNA13, HAS2, EFNB2, RAB11A, EPHA4, IL1B, ASPM, ARF4, CD47, WNT5A, DNAH11, NEXN, ANLN, JAM2, SMURF2, STRAP, DST, SRGAP2C, PROS1, YES1, SPAG16, AVL9, ITGA6, DNAAF2, TMF1, MET, ING2, GRB14, AG…
GO:0051674	localization of cell	689	11	5.06	58	0.01092	0.0109	0.903086	1	Any process in which a cell is transported to, and/or maintained in, a specific location	1.25635	-1.65456	SPNS2, ADAM8, TPGS1, BST2, TIE1, PREX1, SLC9B1, ITGB4, NPHP4, NOTCH1, ELMO3, TGFB1, HMOX1, LAMA2, CERS2, EFNB1, PPIL2, TSPO, CSF1, PGF, ZNF703, DAPK3, CTSH, SOCS7, CDC42BPB, APOE, PLXNB1, TRPM2, GAS6, CSPG4, SCRIB, IGFBP5, HYAL2, SPHK1, FLNA, TRPM4, SLC7A11, BRAT1, KIF14, POMGNT2, FSCN1, GPC1, HDAC5, SPECC1L, VAV2, PPM1F, DAB2IP, JUP, TYRO3, SUN2, BCAR1, ARHGAP35, SEMA4C, RPS19, PLEKHO1, SDC3, TN…	ITGB1, CD58, ARPC5, COL3A1, NFE2L2, NOV, PDCD10, OPHN1, PDGFD, PIK3R1, PHLDB2, PFN2, CPNE3, DNAJA1, RFFL, PDGFRA, RNF20, RTN4, ITGA4, PALLD, MYLK, PTPRK, PSG1, CCNYL1, SPAG9, IQGAP1, MCC, MATN2, CLIC4, CYP1B1, GNA13, HAS2, EFNB2, RAB11A, EPHA4, IL1B, ASPM, ARF4, CD47, WNT5A, DNAH11, NEXN, ANLN, JAM2, SMURF2, STRAP, DST, SRGAP2C, PROS1, YES1, SPAG16, AVL9, ITGA6, DNAAF2, TMF1, MET, ING2, GRB14, AG…
GO:0035666	TRIF-dependent toll-like receptor signal...	22	2	0.16	59	0.01115	0.0112	0.903086	1	Any series of molecular signals generated as a consequence of binding to a toll-like receptor where the TRIF adaptor mediates transduction of the signal. Toll-like receptors directly bind pattern motifs from a variety of microbial sources to initiate innate immune response	0.496855	-0.679682	IKBKG, TICAM1, UBC, IRF3, IRF7	UBE2D3, UBE2D2, LY96, BIRC2, TBK1, TLR4
GO:0009056	catabolic process	1529	19	11.23	757	0.01165	0.1703	0.903086	1	The chemical reactions and pathways resulting in the breakdown of substances, including the breakdown of carbon compounds with the liberation of energy for use by the cell or organism	1.1966	-1.77797	SPP1, ADAM8, FTCD, PNPLA7, PSMA6, IKBKG, EGLN2, ITGB4, SUFU, EXOSC6, SLC27A4, HTT, POP1, TGFB1, USP43, HMOX1, TSPO, COL6A2, DNASE1L2, NEIL1, ISG15, LZTS1, PDE4A, ALDH4A1, TRPC4AP, AKR1C3, ZSWIM9, DAPK3, CTSH, ABTB1, APOE, ANAPC2, FBXL15, RNH1, CSPG4, SREBF1, ATG2A, TOLLIP, MAN2C1, HYAL2, SPHK1, FLNA, PSMB10, MRC2, RPL10, THRA, PLCD1, STK11, TICAM1, GGT7, ZKSCAN3, USP3, TKFC, INPP5E, RPSA, PACS2, …	ITGB1, UBE2D3, BNIP3L, PSMD5, RNASEH2B, PPT1, DRAM2, UCHL5, CUL5, EIF3E, COL3A1, ERAP1, UBE2N, NFE2L2, ZMPSTE24, TENT2, SNX14, OPHN1, FMN2, HSD17B11, UBE2D2, GJA1, COL4A5, CHMP2B, HSP90AA1, GPD2, PAIP1, GSPT1, FBXO8, SNX3, NAPEPLD, USP38, SUMO1, DNM1L, RFFL, SEC22B, GSPT2, TOMM20, ABCD3, COL5A2, PSMD12, RPL39, TBL1XR1, VPS36, GLMN, PNRC2, RPL15, PSMA4, RNF20, RNF111, VCAN, CLOCK, ACADSB, NPEPPS, …
GO:0043123	positive regulation of I-kappaB kinase/N...	121	4	0.89	60	0.01184	0.0118	0.903086	1	Any process that activates or increases the frequency, rate or extent of I-kappaB kinase/NF-kappaB signaling	0.966702	-1.19143	CARD9, TNFRSF19, BST2, IKBKG, HMOX1, SPHK1, FLNA, S100A4, TICAM1, UBC, AKAP13, MIB2, CCDC22, TRADD, IRF3, PLEKHG5, TNFRSF1A, MUL1	TERF2IP, UBE2N, GPRC5B, GJA1, ATP2C1, TRIM13, MTDH, GOLT1B, ANKRD17, MAP3K7, IL1B, C18orf32, TAB2, FKBP1A, SLC20A1, BIRC2, MIER1, TBK1, ECT2, TMEM9B, VAPA, TSPAN6, PRKD1, TLR4, TRAF6, TRIM8, TFG, LPAR1
GO:0002532	production of molecular mediator involve...	23	2	0.17	666	0.01216	0.1477	0.903086	1	The synthesis or release of any molecular mediator of the inflammatory response following an inflammatory stimulus, resulting in an increase in its intracellular or extracellular levels	0.465422	-0.390118	RPS19, BAP1, SLC7A2, SNAP23, CHID1, IL17RC, IL17RA, PER1	SEH1L, VAMP7, SNX4, LYN, TLR4
GO:0010660	regulation of muscle cell apoptotic proc...	23	2	0.17	2052	0.01216	1	0.903086	1	Any process that modulates the rate or frequency of muscle cell apoptotic process, a form of programmed cell death induced by external or internal signals that trigger the activity of proteolytic caspases whose actions dismantle a muscle cell and result in its death	0.288881	-0.476815	HMOX1, HSF1, AMBRA1	NFE2L2, MAP2K4, SIRT1
GO:0031347	regulation of defense response	343	7	2.52	406	0.01247	0.0797	0.903086	1	Any process that modulates the frequency, rate or extent of a defense response	1.19053	-1.53001	HTRA1, LAG3, ADAM8, CARD9, PSMA6, IKBKG, TGFB1, SBNO2, GFI1, SYT11, APOE, SEMA7A, HYAL2, PSMB10, CDK19, TICAM1, TKFC, AP1B1, NR1H2, DAB2IP, TYRO3, RPS19, LDLR, UBC, PTPRS, XIAP, UNC93B1, PTPN1, GPR17, HRAS, BCR, BAP1, RHBDD3, TARBP2, MUC1, RNF216, MAPKBP1, IRF3, SLC7A2, CACTIN, IFNGR2, PPARD, RELB, AP1M1, UCN, TNFRSF1A, CHID1, LRSAM1, STAT5B, F12, IL17RC, IL17RA, HSPA1B, NLRP3, IRF7, MUL1, FANCA,…	UBE2D3, PSMD5, ERAP1, CADM1, STAT1, UBE2N, NOV, TBC1D23, GPRC5B, UBE2D2, GJA1, SUMO1, EIF2AK2, PSMD12, AP1S2, PSMA4, CLOCK, PSMC6, MAP3K1, PRKACB, SOCS5, ELMOD2, PSMA1, LY96, ANKRD17, MAP3K7, PUM2, IL1B, CD47, WNT5A, PUM1, TAB2, PROS1, B2M, WDFY1, AGTR1, SIN3A, BIRC2, PSMD10, VAMP7, SNX4, JAK1, TBK1, NT5E, EGFR, IFNGR1, LYN, AP1G1, ISL1, TSPAN6, PSMD14, PSMD6, PSMD7, HSPD1, LSM14A, TLR4, BCL6, CD…
GO:0040011	locomotion	800	12	5.87	62	0.01253	0.0125	0.903086	1	Self-propelled movement of a cell or organism from one location to another	1.30972	-1.71755	SPNS2, SEMA6C, ADAM8, TPGS1, BST2, TIE1, PREX1, SLC9B1, ITGB4, NPHP4, NOTCH1, ELMO3, TGFB1, HMOX1, LAMA2, CERS2, EFNB1, PPIL2, TSPO, SCN1B, CSF1, PGF, ZNF703, DAPK3, CTSH, SOCS7, PC, CDC42BPB, APOE, PLXNB1, TRPM2, GAS6, CSPG4, SCRIB, NEO1, IGFBP5, HYAL2, SPHK1, FLNA, TRPM4, SLC7A11, BOC, FAM129B, BRAT1, KIF14, POMGNT2, FSCN1, GPC1, HDAC5, SPECC1L, VAV2, PPM1F, DAB2IP, JUP, TYRO3, SUN2, BCAR1, ARH…	ITGB1, CD58, ARRDC3, ARPC5, COL3A1, NFE2L2, NOV, PDCD10, OPHN1, PDGFD, PIK3R1, PHLDB2, CHMP2B, PFN2, CPNE3, DNAJA1, RFFL, PDGFRA, RYK, RNF20, RTN4, CREB1, USP14, ITGA4, PALLD, MYLK, TRIM13, PTPRK, PSG1, CCNYL1, SPAG9, IQGAP1, MCC, MATN2, CLIC4, CYP1B1, GNA13, HAS2, EFNB2, RAB11A, EPHA4, IL1B, ASPM, ARF4, CD47, DPYSL2, WNT5A, DNAH11, NEXN, ANLN, JAM2, SMURF2, STRAP, DST, SRGAP2C, PROS1, YES1, SPAG…
GO:0048522	positive regulation of cellular process	2727	29	20.02	863	0.01283	0.2097	0.903086	1	Any process that activates or increases the frequency, rate or extent of a cellular process, any of those that are carried out at the cellular level, but are not necessarily restricted to a single cell. For example, cell communication occurs among more than one cell, but occurs at the cellular level	1.45254	-1.95018	HTRA1, OSGIN1, SPP1, ADAM8, CARD9, TNFRSF19, BST2, LRP8, CCNK, PSMA6, PIDD1, PRKAR1B, IKBKG, PREX1, BRF1, FZD8, CRTC1, ARAP1, RTEL1, NPHP4, KLF6, EXOSC6, NOTCH1, HTT, TEF, IGFBP2, NPHP1, CROCC, FGFR3, TGFB1, MEF2D, HMOX1, NRF1, LAMA2, MAPK11, EFNB1, TRPV2, TSPO, SCN1B, WRAP53, AP3D1, CSF1, GDPD5, ISG15, PGF, CTNNBIP1, CDK20, CNPY2, SLC35F6, MC1R, AKR1C3, ABCA7, ZNF703, BIN1, DAPK3, ZGLP1, CTSH, P…	ITGB1, CD58, ARRDC3, UBE2D3, SH3BGRL, BNIP3L, ARPC5, PSMD5, DCUN1D4, EEF1E1, ITGB3BP, RNASEH2B, MTBP, PPT1, DYRK1A, PTGES3, RHOQ, WDR35, EIF3E, TERF2IP, THRB, COL3A1, CADM1, STAT1, UBE2N, NFE2L2, ANKRD49, POT1, PHIP, YEATS4, IFT74, MED21, NOV, PDCD10, LINC02210-CRHR1, ZBTB1, PDGFD, PIK3R1, TIAM2, GPRC5B, NUSAP1, PHLDB2, GJA1, DVL3, MKL2, CHMP2B, HSP90AA1, KDM5A, ARL6IP5, PAIP1, GTF2F2, PFN2, MED4…
GO:1901565	organonitrogen compound catabolic proces...	191	5	1.4	244	0.01288	0.0482	0.903086	1	The chemical reactions and pathways resulting in the breakdown of organonitrogen compound	0.89538	-1.1473	FTCD, TGFB1, HMOX1, NEIL1, PDE4A, ALDH4A1, CTSH, CSPG4, HYAL2, SPHK1, GGT7, TST, NTHL1, NUDT18, GPC1, HSPG2, PHYKPL, LDLR, SDC3, ECE1, SATL1, GCAT, NAGLU, MPST, SLC3A2, GPC2, BCAT2, IDUA, SGSH, ITPA, OGDH, NEU3, SMPD1, ACAD8, HGSNAT, SCARB1, SAMHD1, HYAL3, AGRN, SMPD4, ENTPD4	PPT1, ERAP1, VCAN, ACADSB, NPEPPS, ADO, HPSE, HMMR, PCYOX1, HPRT1, MCCC2, GPC5, LUM, TPP1, HNMT, AUH, DDAH1, FGF2, NT5E, ALDH5A1, CTBS, CD44, MBD4, GLS, APOBEC3C, TDG, HIBCH, CHAC2, NUDT9, UNG, NUDT15, PNPLA8, LTA4H, BCKDHB, PPM1K, EGLN1, NT5C3A, CARNMT1, MTRR, ATP2B4, CHP1, HIBADH, HEXB
GO:0046685	response to arsenic-containing substance	24	2	0.18	2053	0.0132	1	0.903086	1	Any process that results in a change in state or activity of a cell or an organism (in terms of movement, secretion, enzyme production, gene expression, etc.) as a result of an arsenic stimulus from compounds containing arsenic, including arsenates, arsenites, and arsenides	0.304861	-0.389227	HMOX1, HSF1	TNFRSF11B, SERPINF1, GCLC
GO:0032355	response to estradiol	68	3	0.5	1134	0.01349	0.3065	0.903086	1	Any process that results in a change in state or activity of a cell or an organism (in terms of movement, secretion, enzyme production, gene expression, etc.) as a result of stimulus by estradiol, a C18 steroid hormone hydroxylated at C3 and C17 that acts as a potent estrogen	0.988189	-0.804339	CRYAB, IGFBP2, TGFB1, ZNF703, PTCH1, MBD3, HSF1, NQO1, UCN, MMP15, STAT5B, BID, BAD, PDGFRB, CST3	AREG, PCNA, OXTR, KIF18A, CDKN1B, SRD5A1, CCNA2, RBBP8, MBD2, EGFR, MBD4, HNRNPD, IL6
GO:1901342	regulation of vasculature development	126	4	0.93	2054	0.01358	1	0.903086	1	Any process that modulates the frequency, rate or extent of vasculature development	0.853779	-1.19714	TIE1, NOTCH1, HMOX1, PGF, CTSH, RNH1, SPHK1, FAM129B, HDAC5, DAB2IP, SIRT6, TNFSF12, HHEX, PRKD2, ADGRB2, CD34, FOXO4, ENG, EPHA1, HIPK1, RUNX1	ERAP1, STAT1, NFE2L2, PDCD10, PDGFD, MTDH, CYP1B1, EFNB2, IL1B, WNT5A, SIRT1, DDAH1, KRIT1, ROCK1, JAK1, FGF2, SERPINB7, SYNJ2BP, ISL1, PRKD1, ANXA3, SEMA5A, CCBE1, RAPGEF2, TNFAIP3, EGLN1, KLF4, EMP2, SERPINF1, IL6, RGCC
GO:0043405	regulation of MAP kinase activity	195	5	1.43	63	0.01399	0.014	0.903086	1	Any process that modulates the frequency, rate or extent of MAP kinase activity	0.948416	-1.37697	ADAM8, IKBKG, FZD8, TGFB1, MAPK11, RGS3, RAPGEF1, APOE, CSPG4, MADD, HYAL2, MAGED1, DUSP8, S1PR2, C1QTNF2, MAP2K3, DAB2IP, AXIN1, UBC, AKAP13, PTPN1, HRAS, MAPK8IP3, CSK, DBNL, PDE6G, MAP3K11, FZD5, TIAM1, MUL1, PDGFRB, SMPD1, AVPI1, MAP3K10, MAP3K6, MAPKAPK2	ZNF675, UBE2N, PDCD10, PDGFD, DVL3, DNAJA1, MAP3K20, EIF2AK2, MAP3K1, MAP4K5, SPAG9, IQGAP1, NRK, MAP4K3, MAP3K7, MAP2K4, EPHA4, IL1B, WNT5A, TAOK3, TAB2, HACD3, RGS2, MBIP, FGF2, EGFR, MAP3K13, CD24, LYN, SPRED2, SPRY2, IQGAP3, AIDA, TLR4, DUSP3, TRAF6, MAP4K2, TGFBR1, ERCC6, GADD45A, PRKAA1, PDGFC, LPAR1
GO:0001881	receptor recycling	25	2	0.18	2055	0.01428	1	0.903086	1	The process that results in the return of receptor molecules to an active state and an active cellular location after they have been stimulated by a ligand. An active state is when the receptor is ready to receive a signal	0.576137	-0.304999	ARAP1, SCRIB, EHD3, ECE1, LMTK2, PHETA1, PLEKHJ1	VAMP3, ALS2
GO:0002756	MyD88-independent toll-like receptor sig...	25	2	0.18	64	0.01428	0.0143	0.903086	1	Any series of molecular signals generated as a consequence of binding to a toll-like receptor not relying on the MyD88 adaptor molecule. Toll-like receptors directly bind pattern motifs from a variety of microbial sources to initiate innate immune response	0.51919	-0.729554	IKBKG, TICAM1, UBC, IRF3, IRF7	UBE2D3, UBE2D2, LY96, BIRC2, TBK1, TLR4, TRAF6
GO:0010657	muscle cell apoptotic process	25	2	0.18	2056	0.01428	1	0.903086	1	A form of programmed cell death induced by external or internal signals that trigger the activity of proteolytic caspases, whose actions dismantle a muscle cell and result in its death. A muscle cell is a mature contractile cell, commonly known as a myocyte, that forms one of three kinds of muscle	0.313763	-0.476815	HMOX1, HSF1, AMBRA1	NFE2L2, MAP2K4, SIRT1
GO:0043954	cellular component maintenance	25	2	0.18	65	0.01428	0.0143	0.903086	1	The organization process that preserves a cellular component in a stable functional or structural state	0.532078	-0.658767	APOE, KIFC3, PARD6A, MTHFR, CTTN, SUPT6H	TANC1, PRNP, RASSF8, PKP2, VPS35, PLEKHA7, SUPV3L1
GO:0044273	sulfur compound catabolic process	25	2	0.18	66	0.01428	0.0143	0.903086	1	The chemical reactions and pathways resulting in the breakdown of compounds that contain sulfur, such as the amino acids methionine and cysteine or the tripeptide glutathione	0.440786	-0.717786	CSPG4, GGT7, GPC1, IDUA, SGSH	VCAN, ADO, HPSE, PCYOX1, LUM, CHAC2, MTRR, HEXB
GO:0048641	regulation of skeletal muscle tissue dev...	25	2	0.18	2057	0.01428	1	0.903086	1	Any process that modulates the frequency, rate or extent of skeletal muscle tissue development	0.454754	-0.455847	TGFB1, FAM129B, GPC1, UQCC2, USP19	DKK1, DDX17, DDX5, PRKAA1, RPS6KB1
GO:0006952	defense response	621	10	4.56	312	0.0144	0.0624	0.903086	1	Reactions, triggered in response to the presence of a foreign body or the occurrence of an injury, which result in restriction of damage to the organism attacked or prevention/recovery from the infection caused by the attack	1.33478	-1.77709	HTRA1, SPP1, LAG3, ADAM8, CARD9, BST2, PSMA6, IKBKG, NOTCH1, TGFB1, HMOX1, TAP1, SBNO2, CSF1, TNFRSF25, ISG15, CTNNBIP1, DAPK3, GFI1, SYT11, APOE, SEMA7A, TOLLIP, HYAL2, SPHK1, PSMB10, CDK19, RAET1G, TICAM1, TKFC, AP1B1, C1R, MAP2K3, NR1H2, HDAC5, DAB2IP, TYRO3, RPS19, LDLR, UBC, TNK2, PTPRS, XIAP, TBKBP1, ROMO1, UNC93B1, PTPN1, GPR17, HRAS, HSF1, BCR, BAP1, GSDMD, RHBDD3, CEBPB, NFATC4, GPR68, T…	ITGB1, CD58, UBE2D3, BNIP3L, PSMD5, ERAP1, CADM1, STAT1, UBE2N, NFE2L2, NOV, TNFRSF11B, ZBTB1, TBC1D23, CAPZA1, GPRC5B, UBE2D2, GJA1, SUMO1, EIF2AK2, PSMD12, RPL39, AP1S2, PSMA4, CLOCK, RBPJ, GPAM, PSMC6, MAP3K1, PRKACB, TRIM13, LIPA, SOCS5, ELMOD2, PSMA1, PXK, LY96, ANKRD17, MAP3K7, PUM2, IL1B, CD47, BECN1, WNT5A, IRF2, PUM1, TAB2, PROS1, YES1, FAM111A, B2M, TMF1, SRPK1, CAPZA2, PLAC8, WDFY1, AG…
GO:0009967	positive regulation of signal transducti...	816	12	5.99	276	0.0145	0.0542	0.903086	1	Any process that activates or increases the frequency, rate or extent of signal transduction	1.17761	-1.64965	ADAM8, CARD9, TNFRSF19, BST2, PSMA6, PIDD1, IKBKG, FZD8, ARAP1, NOTCH1, HTT, FGFR3, TGFB1, HMOX1, MAPK11, CSF1, MC1R, AKR1C3, ABCA7, DAPK3, CTSH, RAPGEF1, GFI1, PLXNB1, FBXL15, GAS6, CSPG4, MADD, SEMA7A, NEO1, IGFBP5, HYAL2, SPHK1, MAGED1, SPPL3, FLNA, PSMB10, TRPM4, S100A4, STK11, TICAM1, RFNG, JPH2, S1PR2, LAMTOR4, C1QTNF2, MAP2K3, DAB2IP, JUP, AXIN1, SEMA4C, UBC, TELO2, SHF, TNFSF12, CARD10, A…	ARRDC3, SH3BGRL, PSMD5, EEF1E1, WDR35, TERF2IP, COL3A1, UBE2N, PHIP, NOV, PDCD10, PDGFD, PIK3R1, GPRC5B, GJA1, DVL3, ARL6IP5, YWHAZ, EIF2A, ATP2C1, TMEM33, PIBF1, MAP3K20, DNM1L, EIF2AK2, PSMD12, PDGFRA, RYK, PSMA4, RNF111, RTN4, RBPJ, CDKN2AIP, PSMC6, UBE3A, MAP3K1, CDKN2B, TRIM13, MTDH, PKD2, HPSE, MAP4K5, SPAG9, RC3H1, IQGAP1, NRK, STK3, GDF6, MAP4K3, FBXW7, PSMA1, LY96, GOLT1B, ANKRD17, CYP1B…
GO:0000461	endonucleolytic cleavage to generate mat...	2	1	0.01	67	0.01463	0.0146	0.903086	1	Endonucleolytic cleavage at the 3'-end of the SSU-rRNA from an originally tricistronic rRNA transcript that contained the Small Subunit (SSU) rRNA, the 5.8S rRNA, and the Large Subunit (LSU) rRNA in that order from 5' to 3' along the primary transcript, to produce the mature end of the SSU-rRNA	0.587286	0.587286	RPSA, RPS21
GO:0001579	medium-chain fatty acid transport	2	1	0.01	68	0.01463	0.0146	0.903086	1	The directed movement of medium-chain fatty acids into, out of or within a cell, or between cells, by means of some agent such as a transporter or pore. A medium-chain fatty acid is a fatty acid with a chain length of between C6 and C12	0.688848	0.688848	SLC27A4
GO:0002536	respiratory burst involved in inflammato...	2	1	0.01	2058	0.01463	1	0.903086	1	A phase of elevated metabolic activity, during which oxygen consumption increases following a stimulus as part of an inflammatory response; this leads to the production, by an NADH dependent system, of hydrogen peroxide (H2O2), superoxide anions and hydroxyl radicals, resulting in an increase in their intracellular or extracellular levels	0.263335	0.263335	RPS19
GO:0005999	xylulose biosynthetic process	2	1	0.01	69	0.01463	0.0146	0.903086	1	The chemical reactions and pathways resulting in the formation of xylulose, the ketopentose threo-2-pentulose	0.412388	0.412388	TKT
GO:0006407	rRNA export from nucleus	2	1	0.01	70	0.01463	0.0146	0.903086	1	The directed movement of rRNA from the nucleus to the cytoplasm; the rRNA is usually in the form of ribonucleoproteins	0.357499	0.357499	RPSA
GO:0006788	heme oxidation	2	1	0.01	71	0.01463	0.0146	0.903086	1	The chemical reactions and pathways resulting in the loss of electrons from one or more atoms in heme	0.482619	0.482619	HMOX1
GO:0010887	negative regulation of cholesterol stora...	2	1	0.01	72	0.01463	0.0146	0.903086	1	Any process that decreases the rate or extent of cholesterol storage. Cholesterol storage is the accumulation and maintenance in cells or tissues of cholesterol, cholest-5-en-3 beta-ol, the principal sterol of vertebrates and the precursor of many steroids, including bile acids and steroid hormones	0.522512	0.522512	NR1H2
GO:0014805	smooth muscle adaptation	2	1	0.01	2059	0.01463	1	0.903086	1	Any process in which smooth muscle adapts, with consequent modifications to structural and/or functional phenotypes, in response to a stimulus. Stimuli include contractile activity, loading conditions, substrate supply, and environmental factors. These adaptive events occur in both muscle fibers and associated structures (motoneurons and capillaries), and they involve alterations in regulatory me…	0.0249893	0.0249893	HMOX1	IL1B
GO:0014900	muscle hyperplasia	2	1	0.01	2060	0.01463	1	0.903086	1	A muscle system process that results in an increase in cell number by cell division, often leading to an increase in the size of an organ	0.237333	0.237333	HMOX1	KLF4
GO:0015803	branched-chain amino acid transport	2	1	0.01	2061	0.01463	1	0.903086	1	The directed movement of branched-chain amino acids into, out of or within a cell, or between cells, by means of some agent such as a transporter or pore. Branched-chain amino acids are amino acids with a branched carbon skeleton without rings	0.376324	0.376324	SLC3A2
GO:0016080	synaptic vesicle targeting	2	1	0.01	73	0.01463	0.0146	0.903086	1	The process in which synaptic vesicles are directed to specific destination membranes, mediated by molecules at the vesicle membrane and target membrane surfaces	0.222928	0.222928	SCRIB
GO:0032764	negative regulation of mast cell cytokin...	2	1	0.01	74	0.01463	0.0146	0.903086	1	Any process that stops, prevents, or reduces the frequency, rate, or extent of mast cell cytokine production	0.204866	0.204866	HMOX1	BCL6
GO:0033007	negative regulation of mast cell activat...	2	1	0.01	2062	0.01463	1	0.903086	1	Any process that stops, prevents, or reduces the frequency, rate, or extent of mast cell activation as part of an immune response	0.430187	0.430187	HMOX1
GO:0033625	positive regulation of integrin activati...	2	1	0.01	75	0.01463	0.0146	0.903086	1	Any process that activates or increases the frequency, rate, or extent of integrin activation	0.52307	0.52307	PIEZO1
GO:0033634	positive regulation of cell-cell adhesio...	2	1	0.01	76	0.01463	0.0146	0.903086	1	Any process that activates or increases the frequency, rate, or extent of cell-cell adhesion mediated by integrin	0.534423	0.534423	PIEZO1
GO:0035865	cellular response to potassium ion	2	1	0.01	77	0.01463	0.0146	0.903086	1	Any process that results in a change in state or activity of a cell (in terms of movement, secretion, enzyme production, gene expression, etc.) as a result of a potassium ion stimulus	0.273895	0.273895	HSF1
GO:0045218	zonula adherens maintenance	2	1	0.01	78	0.01463	0.0146	0.903086	1	Maintaining the zonula adherens junction, the cell-cell adherens junction formed near the apex of epithelial cells	0.102123	0.102123	KIFC3	PLEKHA7
GO:0046166	glyceraldehyde-3-phosphate biosynthetic ...	2	1	0.01	79	0.01463	0.0146	0.903086	1	The chemical reactions and pathways resulting in the formation of glyceraldehyde-3-phosphate, an important intermediate in glycolysis	0.470662	0.470662	TKT
GO:0051012	microtubule sliding	2	1	0.01	80	0.01463	0.0146	0.903086	1	The movement of one microtubule along another microtubule	-0.0922708	-0.0922708	MAP4	SPAG16
GO:0060264	regulation of respiratory burst involved...	2	1	0.01	2063	0.01463	1	0.903086	1	Any process that modulates the rate, frequency or extent of a phase of elevated metabolic activity, during which oxygen consumption increases made as a defense response ; this leads to the production, by an NADH dependent system, of hydrogen peroxide (H2O2), superoxide anions and hydroxyl radicals	0.263335	0.263335	RPS19
GO:0060266	negative regulation of respiratory burst...	2	1	0.01	81	0.01463	0.0146	0.903086	1	Any process that decreases the rate, frequency or extent of a phase of elevated metabolic activity, during which oxygen consumption increases made as a defense response ; this leads to the production, by an NADH dependent system, of hydrogen peroxide (H2O2), superoxide anions and hydroxyl radicals	0.263335	0.263335	RPS19
GO:0071896	protein localization to adherens junctio...	2	1	0.01	82	0.01463	0.0146	0.903086	1	Any process in which a protein is transported to, and/or maintained at the adherens junction	0.443019	0.443019	SCRIB
GO:0072737	response to diamide	2	1	0.01	83	0.01463	0.0146	0.903086	1	Any process that results in a change in state or activity of a cell or an organism (in terms of movement, secretion, enzyme production, gene expression, etc.) as a result of a diamide (N,N,N',N'-tetramethyldiazene-1,2-dicarboxamide) stimulus	0.254938	0.254938	HSF1
GO:0072738	cellular response to diamide	2	1	0.01	84	0.01463	0.0146	0.903086	1	Any process that results in a change in state or activity of a cell (in terms of movement, secretion, enzyme production, gene expression, etc.) as a result of a diamide (N,N,N',N'-tetramethyldiazene-1,2-dicarboxamide) stimulus	0.254938	0.254938	HSF1
GO:0090107	regulation of high-density lipoprotein p...	2	1	0.01	2064	0.01463	1	0.903086	1	Any process that modulates the frequency, rate, or extent of high-density lipoprotein particle assembly. High-density lipoprotein particle assembly is the aggregation and arrangement of proteins and lipids to form a high-density lipoprotein particle	0.401516	0.401516	NR1H2
GO:0090182	regulation of secretion of lysosomal enz...	2	1	0.01	2065	0.01463	1	0.903086	1	Any process that modulates the rate, frequency or extent of secretion of lysosomal enzymes, the controlled release of lysosomal enzymes by a cell	0.522512	0.522512	NR1H2
GO:1902856	negative regulation of non-motile cilium...	2	1	0.01	85	0.01463	0.0146	0.903086	1	Any process that stops, prevents or reduces the frequency, rate or extent of nonmotile primary cilium assembly	0.458874	0.458874	MAP4
GO:1905449	regulation of Fc-gamma receptor signalin...	2	1	0.01	86	0.01463	0.0146	0.903086	1		0.339363	0.339363	RAPGEF1
GO:1905451	positive regulation of Fc-gamma receptor...	2	1	0.01	87	0.01463	0.0146	0.903086	1		0.339363	0.339363	RAPGEF1
GO:2001016	positive regulation of skeletal muscle c...	2	1	0.01	88	0.01463	0.0146	0.903086	1	Any process that activates or increases the frequency, rate or extent of skeletal muscle cell differentiation	0.295821	0.295821	GPC1
GO:0043547	positive regulation of GTPase activity	357	7	2.62	738	0.01526	0.1684	0.936196	1	Any process that activates or increases the activity of a GTPase	0.904623	-1.46585	PREX1, ARAP1, RGS12, FGFR3, SBF1, RGS3, DENND4A, RAPGEF1, PLXNB1, RANGAP1, MADD, SCRIB, PLEKHG4, ARHGEF10L, VPS9D1, PLEKHG3, AGAP6, RABEP2, TBC1D22A, RAP1GAP2, TRAPPC9, ARHGEF19, LAMTOR4, RALGDS, ARHGEF4, VAV2, DAB2IP, AXIN1, ARHGAP35, GMIP, TBC1D14, TBCD, SIPA1L3, ARFGAP1, RGS20, DEPDC5, AKAP13, DENND3, TBC1D13, TRAPPC6A, DOCK6, GNB5, HRAS, DENND4C, BCR, SRGAP2, RAPGEFL1, DENND1A, AGAP9, MYO9B, …	ITGB1, AGFG1, RPGR, OPHN1, TIAM2, DVL3, FBXO8, DNM1L, ASAP2, PDGFRA, TRAPPC6B, DEPDC7, SNX13, AC091057.1, RCBTB2, DENND6A, IQGAP1, RASA1, ELMOD2, SMAP1, DIS3, GNA13, ARF4, ARHGAP5, WNT5A, FAM13B, CHML, SRGAP2C, EIF5, GDI2, SOS2, CDC42EP3, CALM2, DOCK11, ITGA6, MET, HACD3, RGS2, ARHGAP11A, TBC1D12, DNMBP, JAK1, FGF2, DEPDC1, EGFR, BNIP2, PLEKHG7, TBCK, TBC1D8, GIT2, NET1, ECT2, ARFGAP3, RABGAP1L, …
GO:0070423	nucleotide-binding oligomerization domai...	26	2	0.19	89	0.0154	0.0154	0.939024	1	Any series of molecular signals generated as a consequence of binding to a nucleotide-binding oligomerization domain containing (NOD) protein	0.484819	-0.607182	IKBKG, UBC, XIAP, HSPA1B	UBE2N, MAP3K7, TAB2, BIRC2, TLR4, TRAF6, TNFAIP3
GO:0010562	positive regulation of phosphorus metabo...	536	9	3.94	90	0.01574	0.0157	0.948193	1	Any process that increases the frequency, rate or extent of the chemical reactions and pathways involving phosphorus or compounds containing phosphorus	1.15976	-1.42346	ADAM8, CARD9, TNFRSF19, LRP8, CCNK, PRKAR1B, IKBKG, FZD8, FGFR3, TGFB1, MAPK11, CSF1, CDK20, MC1R, ABCA7, RAPGEF1, CLIP3, APOE, GAS6, CSPG4, MADD, SEMA7A, CDK9, SPHK1, MAGED1, SPPL3, PTPA, STK11, ZNF16, BRAT1, S1PR2, MAPT, KIF14, C1QTNF2, MAP2K3, VAV2, DAB2IP, AXIN1, CAMKK1, SEMA4C, RAMP1, UBC, TELO2, TNK2, CARD10, AKAP13, DVL1, PTPN1, HRAS, HSF1, MAPK8IP3, SYMPK, RASSF2, PILRB, CSK, AMBRA1, DGKQ…	PTGES3, TERF2IP, UBE2N, PDCD10, LINC02210-CRHR1, PDGFD, GPRC5B, DVL3, ARL6IP5, PFN2, PIBF1, MNAT1, ADNP, MAP3K20, HSPH1, EIF2AK2, FAM129A, MOB1B, PDGFRA, GLMN, RYK, PPP2R3C, MAP3K1, PRKACB, PKD2, MAP4K5, PRKAR1A, SPAG9, STRADB, PRNP, IQGAP1, NRK, STK3, GDF6, MAP4K3, AREG, FBXW7, CCNH, MAP3K7, MAP2K4, PPP1R12A, EPHA4, IL1B, WNT5A, TAOK3, CCNC, GDF11, TAB2, YES1, COPS8, TTK, CALM2, CDKN1B, ITGA6, S…
GO:0045937	positive regulation of phosphate metabol...	536	9	3.94	91	0.01574	0.0157	0.948193	1	Any process that activates or increases the frequency, rate or extent of the chemical reactions and pathways involving phosphates	1.15976	-1.42346	ADAM8, CARD9, TNFRSF19, LRP8, CCNK, PRKAR1B, IKBKG, FZD8, FGFR3, TGFB1, MAPK11, CSF1, CDK20, MC1R, ABCA7, RAPGEF1, CLIP3, APOE, GAS6, CSPG4, MADD, SEMA7A, CDK9, SPHK1, MAGED1, SPPL3, PTPA, STK11, ZNF16, BRAT1, S1PR2, MAPT, KIF14, C1QTNF2, MAP2K3, VAV2, DAB2IP, AXIN1, CAMKK1, SEMA4C, RAMP1, UBC, TELO2, TNK2, CARD10, AKAP13, DVL1, PTPN1, HRAS, HSF1, MAPK8IP3, SYMPK, RASSF2, PILRB, CSK, AMBRA1, DGKQ…	PTGES3, TERF2IP, UBE2N, PDCD10, LINC02210-CRHR1, PDGFD, GPRC5B, DVL3, ARL6IP5, PFN2, PIBF1, MNAT1, ADNP, MAP3K20, HSPH1, EIF2AK2, FAM129A, MOB1B, PDGFRA, GLMN, RYK, PPP2R3C, MAP3K1, PRKACB, PKD2, MAP4K5, PRKAR1A, SPAG9, STRADB, PRNP, IQGAP1, NRK, STK3, GDF6, MAP4K3, AREG, FBXW7, CCNH, MAP3K7, MAP2K4, PPP1R12A, EPHA4, IL1B, WNT5A, TAOK3, CCNC, GDF11, TAB2, YES1, COPS8, TTK, CALM2, CDKN1B, ITGA6, S…
GO:0034329	cell junction assembly	132	4	0.97	92	0.01587	0.0159	0.950299	1	A cellular process that results in the aggregation, arrangement and bonding together of a set of components to form a cell junction	0.866211	-0.997153	ITGB4, NPHP4, NPHP1, TLN2, ZNF703, DAPK3, RAPGEF1, FLNA, PARD6A, FBF1, FSCN1, PLEC, PPM1F, JUP, TBCD, LAMA5, CTTN, ACTN4, COL16A1, LSR, MPP5, MICALL2, FZD5, PKP3, HIPK1, ITGB3, FLNC, RCC2	PHLDB2, GJA1, PDCD6IP, PTPRK, MTDH, IQGAP1, TJP1, ITGA6, VCL, PKP2, RAP1B, ROCK1, LAMA3, ECT2, S100A10, EPB41L3, CLASP2, PRKCI, PTK2, RAPGEF2, SLK, AC068234.1, HEG1, LAMC2, MACF1, PIP5K1A, GNPAT, DLC1, ACTB
GO:0035872	nucleotide-binding domain, leucine rich ...	27	2	0.2	93	0.01656	0.0166	0.979882	1	A series of molecular signals generated as a consequence of a nucleotide-binding domain, leucine rich repeat containing receptor (NLR) binding to one of its physiological ligands. NLRs are cytoplasmic receptors defined by their tripartite domain architecture that contains: a variable C-terminus, a middle nucleotide-binding domain, and a LRR domain that is variable in the repeats composition and n…	0.484819	-0.625349	IKBKG, UBC, XIAP, HSPA1B	UBE2N, MAP3K7, TAB2, BIRC2, TLR4, TRAF6, TNFAIP3
GO:1901575	organic substance catabolic process	1250	16	9.18	174	0.01656	0.0302	0.979882	1	The chemical reactions and pathways resulting in the breakdown of an organic substance, any molecular entity containing carbon	1.17665	-1.66398	SPP1, ADAM8, FTCD, PNPLA7, PSMA6, EGLN2, SUFU, EXOSC6, SLC27A4, HTT, POP1, TGFB1, USP43, HMOX1, DNASE1L2, NEIL1, ISG15, PDE4A, ALDH4A1, TRPC4AP, AKR1C3, ZSWIM9, CTSH, ABTB1, APOE, ANAPC2, FBXL15, RNH1, CSPG4, TOLLIP, MAN2C1, HYAL2, SPHK1, FLNA, PSMB10, RPL10, THRA, PLCD1, GGT7, USP3, TKFC, INPP5E, RPSA, CPT1A, FBXL19, TST, PLK3, KIF14, NTHL1, CTSV, PFKL, TMEM259, NUDT18, GPC1, ABCD1, PNPT1, HSPG2…	UBE2D3, BNIP3L, PSMD5, RNASEH2B, PPT1, UCHL5, CUL5, EIF3E, ERAP1, UBE2N, NFE2L2, ZMPSTE24, TENT2, OPHN1, FMN2, HSD17B11, UBE2D2, GJA1, HSP90AA1, GPD2, PAIP1, GSPT1, FBXO8, SNX3, NAPEPLD, USP38, SUMO1, RFFL, SEC22B, GSPT2, ABCD3, PSMD12, RPL39, TBL1XR1, VPS36, GLMN, PNRC2, RPL15, PSMA4, RNF20, RNF111, VCAN, CLOCK, ACADSB, NPEPPS, PSMC6, ADO, UBE3A, AZIN1, USP14, LYPLA1, CDC27, TOPORS, CNOT8, TATDN…
GO:0022603	regulation of anatomical structure morph...	542	9	3.98	773	0.01682	0.1766	0.989412	1	Any process that modulates the frequency, rate or extent of anatomical structure morphogenesis	1.12468	-1.49833	SPP1, TIE1, LRP8, PSMA6, PREX1, ARAP1, NOTCH1, TGFB1, HMOX1, TRPV2, KIF13B, CSF1, LZTS1, PGF, DAPK3, CTSH, TBX2, WASF3, APOE, PLXNB1, ANAPC2, RNH1, SCX, SEMA7A, SPHK1, MAGED1, FLNA, PSMB10, STK11, PARD6A, FAM129B, ARHGEF19, MAPT, HDAC5, DAB2IP, C21orf2, ARHGAP35, SIRT6, PLEKHO1, UBC, CUL7, BTBD7, INF2, CSNK1G2, PLXNB2, TNFSF12, PTPRS, AKAP13, PLXNA1, DVL1, CTTN, BCR, NFATC4, CELSR3, MIEF2, HHEX, …	PSMD5, RHOQ, ERAP1, STAT1, NFE2L2, ZMYM6, PHIP, PDCD10, TNFRSF11B, PHLDB2, DVL3, ADNP, DNM1L, COL5A2, PSMD12, RYK, PSMA4, RTN4, RBPJ, CDC7, PSMC6, MTDH, RC3H1, RASA1, GNG5, ZMYM4, FBXW7, PSMA1, DKK1, CYP1B1, GNA13, HAS2, EFNB2, OMA1, BASP1, RAB11A, EPHA4, IL1B, DPYSL2, WNT5A, SMURF2, YWHAH, CDC42EP3, SIRT1, MFF, ZNRF3, PSMD10, DDAH1, KRIT1, SEPT7, VAMP7, MYO10, TGFB2, VPS35, SYT1, GBP1, PDLIM5, R…
GO:0040008	regulation of growth	365	7	2.68	94	0.01705	0.0171	0.99593	1	Any process that modulates the frequency, rate or extent of the growth of all or part of an organism so that it occurs at its proper speed, either globally or in a specific part of the organism's development	1.68794	-1.28031	CRYAB, HTRA1, IGFBP7, OSGIN1, SPP1, TMEM8B, BST2, EGLN2, NOTCH1, IGFBP2, FGFR3, TGFB1, MAPK11, TRPV2, CSF1, SOCS7, TBX2, APOE, ANAPC2, GAS6, SEMA7A, IGFBP5, HYAL2, SPHK1, HLX, STK11, PTCH1, CCDC85B, MAPT, KIF14, PNPT1, PPM1F, DAB2IP, ACACB, TKT, BCAR1, APBB1, PTPRS, PLXNA1, CTDP1, CTTN, HSF1, BAP1, BDKRB1, MT1F, POR, GNG4, PPARD, CLSTN1, SOCS4, UCN, WFS1, STAT5B, SIPA1, H3F3A, IGFBP4, HSPA1B, SES…	PPT1, YEATS4, NOV, GJA1, ADNP, EBAG9, RTN4, RBPJ, BLZF1, CDKN2AIP, GPAM, CREB1, STC2, TAF9, SOCS5, EPC1, NRK, STK3, KIAA1109, BASP1, RAB11A, DPYSL2, WNT5A, TNKS2, CRIM1, CDKN1B, SIRT1, ING2, PLAC8, URI1, ZNF639, AGTR1, PSMD10, EI24, CREG1, ADIPOR1, RB1, ING3, TGFB2, CSNK2A1, SYT1, SH3BP4, USP47, FGF2, EGFR, LATS2, EXOSC9, CDC42, CDC73, SDCBP, NET1, SGK3, MCTS1, SMARCA2, SERP1, STK4, IFRD1, JADE1,…
GO:0016477	cell migration	638	10	4.68	95	0.01713	0.0171	0.99593	1	The controlled self-propelled movement of a cell from one site to a destination guided by molecular cues. Cell migration is a central process in the development and maintenance of multicellular organisms	1.19535	-1.65456	SPNS2, ADAM8, BST2, TIE1, PREX1, NOTCH1, ELMO3, TGFB1, HMOX1, LAMA2, CERS2, EFNB1, PPIL2, TSPO, CSF1, PGF, ZNF703, DAPK3, CTSH, SOCS7, CDC42BPB, APOE, PLXNB1, TRPM2, GAS6, CSPG4, SCRIB, IGFBP5, HYAL2, SPHK1, FLNA, TRPM4, SLC7A11, BRAT1, KIF14, POMGNT2, FSCN1, GPC1, HDAC5, SPECC1L, VAV2, PPM1F, DAB2IP, JUP, TYRO3, SUN2, BCAR1, ARHGAP35, SEMA4C, RPS19, PLEKHO1, SDC3, TNK2, PLXNB2, TNFSF12, WASHC1, …	ITGB1, CD58, ARPC5, COL3A1, NFE2L2, NOV, PDCD10, OPHN1, PDGFD, PIK3R1, PHLDB2, PFN2, CPNE3, RFFL, PDGFRA, RNF20, RTN4, ITGA4, PALLD, MYLK, PTPRK, PSG1, SPAG9, IQGAP1, MCC, MATN2, CLIC4, CYP1B1, GNA13, HAS2, EFNB2, RAB11A, EPHA4, IL1B, ASPM, ARF4, CD47, WNT5A, NEXN, ANLN, JAM2, SMURF2, STRAP, SRGAP2C, PROS1, YES1, AVL9, ITGA6, MET, GRB14, AGTR1, SBDS, NCK1, VCL, KRIT1, ADIPOR1, PKP2, TGFB2, SLC16A…
GO:0044699	single-organism process	6762	57	49.65	1397	0.01736	0.4022	1	1	A biological process that involves only one organism	1.97482	-2.15371	CRYAB, SPNS2, HTRA1, IGFBP7, OSGIN1, SPP1, TSNARE1, TMEM38A, TMX1, SEMA6C, TSPAN9, APLP1, ADAM11, LAG3, TMEM8B, NOXA1, ADAM8, CARD9, TPGS1, TMEM65, TNFRSF19, BST2, AKAP10, FTCD, PNPLA7, AL928654.3, TIE1, LRP8, CCNK, SEMA6B, PSMA6, ADAMTS1, PIDD1, PRKAR1B, IKBKG, WFIKKN1, B3GNT3, PHC1, RHOF, ASPHD1, KLF16, PREX1, EGLN2, REC8, FZD8, IBA57, WDR33, PPFIA3, CRTC1, TOM1, SLC9B1, IPO4, ANKRD11, IPPK, AR…	ITGB1, YPEL5, ZNF675, CENPQ, KLF3, CCNG1, GEM, CD58, ARRDC3, UBE2D3, EXTL2, SH3BGRL, BNIP3L, ELOVL7, MINPP1, ENTPD7, HIGD1A, WIPF1, ARPC5, SNRK, ATP5F1EP2, NEDD1, PSMD5, EEF1E1, ITGB3BP, CETN2, LRRCC1, PPCS, PLPP5, BCHE, RNASEH2B, MTBP, AGFG1, PPT1, PGM3, DYRK1A, PTGES3, ALKBH8, DRAM2, RHOQ, UCHL5, SLC39A6, CUL5, WDR35, KPNA3, TANC1, UTRN, TERF2IP, TOPBP1, THRB, EXOC5, IREB2, COL3A1, BICC1, PEX3,…
GO:0002699	positive regulation of immune effector p...	75	3	0.55	1405	0.01752	0.4076	1	1	Any process that activates or increases the frequency, rate, or extent of an immune effector process	0.834908	-1.06832	LAG3, EXOSC6, TGFB1, HMOX1, RAPGEF1, SEMA7A, HLX, RPS19, GAB2, STAT5B, FZD5, NLRP3, ATAD5	CADM1, ZBTB1, GPRC5B, SOCS5, ANKRD17, MAP3K7, PUM2, IL1B, WNT5A, PUM1, B2M, MSH6, MSH2, EXOSC3, VAMP7, SNX4, LYN, AP1G1, HSPD1, TLR4, UNG, CD46, TRAF6, STYK1, TRIM6, IL6, GATA3
GO:0090288	negative regulation of cellular response...	75	3	0.55	96	0.01752	0.0175	1	1	Any process that decreases the rate, frequency, or extent of a change in state or activity of a cell (in terms of movement, secretion, enzyme production, gene expression, etc.) as a result of a growth factor stimulus	0.851179	-0.830832	HTRA1, NOTCH1, TGFB1, FAM129B, GPC1, DAB2IP, UBC, PTPN1, HHEX, FUZ, VASN, NBL1, CASK, SMAD6, LTBP1, CD109	TRIM33, DKK1, SHISA2, WNT5A, SMURF2, STRAP, SIRT1, CTDSPL2, TOB1, SPRY2, TGFBR1, SNX25, GATA3
GO:0090287	regulation of cellular response to growt...	138	4	1.01	100	0.01839	0.0184	1	1	Any process that modulates the rate, frequency, or extent of a change in state or activity of a cell (in terms of movement, secretion, enzyme production, gene expression, etc.) as a result of a growth factor stimulus	0.928743	-0.987182	HTRA1, NOTCH1, TGFB1, ZNF703, FBXL15, NEO1, STK11, FAM129B, GPC1, DAB2IP, UBC, XIAP, PTPN1, UBE2O, HHEX, FUZ, VASN, NBL1, PPP2R5B, PRKD2, CASK, SMAD6, LTBP1, ENG, HSP90AB1, ITGB3, CD109	TRIM33, RNF111, RBPJ, CDKN2B, DKK1, SHISA2, IL1B, WNT5A, SLC9A6, SMURF2, STRAP, SIRT1, ING2, CYFIP2, CTDSPL2, FGF2, ACVR2A, CITED2, SDCBP, TOB1, SPRY2, SNW1, CCBE1, AC068234.1, TGFBR1, SNX25, GATA3
GO:0051336	regulation of hydrolase activity	746	11	5.48	547	0.01892	0.1132	1	1	Any process that modulates the frequency, rate or extent of hydrolase activity, the catalysis of the hydrolysis of various bonds, e.g. C-O, C-N, C-C, phosphoric anhydride bonds, etc. Hydrolase is the systematic name for any enzyme of EC class 3	1.13942	-1.59963	WDR81, BST2, LMTK3, PIDD1, WFIKKN1, PREX1, ARAP1, STMN3, RGS12, HTT, FGFR3, NEIL1, SBF1, RGS3, CTSH, DENND4A, RAPGEF1, PKMYT1, PLXNB1, RANGAP1, GAS6, MADD, SCRIB, PLEKHG4, ARHGEF10L, PTPA, VPS9D1, PLEKHG3, AGAP6, RABEP2, TBC1D22A, MAPK12, RAP1GAP2, TRAPPC9, ARHGEF19, MAPT, LAMTOR4, RALGDS, NR1H2, ARHGEF4, VAV2, PPM1F, DAB2IP, AXIN1, ARHGAP35, GMIP, TBC1D14, TBCD, SIPA1L3, ARFGAP1, RGS20, DEPDC5, …	ITGB1, AGFG1, PPT1, UCHL5, WDR35, POT1, RPGR, OPHN1, TIAM2, DVL3, KDM5A, ARL6IP5, FBXO8, PFN2, NIFK, DNAJA1, SUMO1, DNM1L, RFFL, NPM1, ASAP2, PDGFRA, TRAPPC6B, DEPDC7, SNX13, AC091057.1, USP14, RCBTB2, MPHOSPH10, CARD8, DENND6A, IQGAP1, RASA1, ELMOD2, SERPINB8, PCNA, AHSA2P, SMAP1, DIS3, GNA13, ABCE1, ARL6IP1, PPP1R12A, EPHA4, ARF4, ARHGAP5, PICALM, WNT5A, DNAJC2, FAM13B, CHML, SRGAP2C, PROS1, RB…
GO:0008347	glial cell migration	29	2	0.21	102	0.01897	0.019	1	1	The orderly movement of a glial cell, non-neuronal cells that provide support and nutrition, maintain homeostasis, form myelin, and participate in signal transmission in the nervous system	0.755006	-0.643915	CERS2, TSPO, CSF1, SOCS7, CSPG4, SCRIB, DAB2IP, SUN2, SRGAP2, TIAM1	RTN4, MATN2, EPHA4, SRGAP2C, TGFB2, LAMB1, HEXB
GO:0051091	positive regulation of sequence-specific...	140	4	1.03	2066	0.01928	1	1	1	Any process that activates or increases the frequency, rate or extent of activity of a transcription factor, any factor involved in the initiation or regulation of transcription	1.0265	-1.16429	ADAM8, LRP8, PSMA6, PIDD1, IKBKG, CRTC1, TGFB1, SPHK1, TICAM1, TRAPPC9, HDAC5, JUP, UBC, TRADD, AMH, PPP2R5B, PRKD2, FZD2, HSPA1B, CRTC2, NLRP3	TERF2IP, UBE2N, EIF2AK2, NPM1, CLOCK, MBTPS2, TRIM13, MTDH, STK3, MAP3K7, IL1B, WNT5A, TAB2, ATF2, ZIC2, MAP3K13, TRIM37, PRKD1, ANXA3, TLR4, PRKCI, TRAF6, TRIM52, PRDX3, EP300, GTF2A2, TAF1, ARID5B, IL6, TRIM8, RGCC, TAF12, BUD31
GO:0044700	single organism signaling	2933	30	21.53	774	0.01931	0.1776	1	1	A signaling process occurring within a single organism	1.74772	-2.03048	CRYAB, SPNS2, HTRA1, TSPAN9, APLP1, ADAM11, LAG3, ADAM8, CARD9, TPGS1, TMEM65, TNFRSF19, BST2, AKAP10, AL928654.3, TIE1, LRP8, PSMA6, ADAMTS1, PIDD1, IKBKG, RHOF, KLF16, PREX1, EGLN2, FZD8, PPFIA3, CRTC1, ARAP1, ITGB4, STMN3, PANX2, NEURL1B, SUFU, RGS12, NPHP4, RHOBTB2, NOTCH1, FAM83G, SBK2, HTT, IGFBP2, TSPAN10, NPHP1, FGFR3, TGFB1, MEF2D, HMOX1, LAMA2, MAPK11, EFNB1, KIF13B, TSPO, SCN1B, SZT2, …	ITGB1, ZNF675, GEM, ARRDC3, UBE2D3, SH3BGRL, BNIP3L, WIPF1, ARPC5, SNRK, PSMD5, EEF1E1, ITGB3BP, PLPP5, BCHE, PPT1, DYRK1A, PTGES3, RHOQ, CUL5, WDR35, TERF2IP, TOPBP1, THRB, COL3A1, BICC1, ERAP1, STAT1, UBE2N, NFE2L2, XPR1, PHIP, IFT74, ZBTB33, C3orf58, NOV, NETO2, PDCD10, LINC02210-CRHR1, TNFRSF11B, LRRC1, OPHN1, FMN2, PDGFD, PIK3R1, PPP2R5E, TIAM2, GPRC5B, UBE2D2, GKAP1, GJA1, COL4A5, DVL3, CPE…
GO:0009605	response to external stimulus	952	13	6.99	926	0.01935	0.2298	1	1	Any process that results in a change in state or activity of a cell or an organism (in terms of movement, secretion, enzyme production, gene expression, etc.) as a result of an external stimulus	1.37894	-1.60472	HTRA1, SPP1, SEMA6C, ADAM8, CARD9, BST2, PSMA6, ANKRD23, IKBKG, PREX1, CRTC1, SLC27A4, NOTCH1, HTT, IGFBP2, TGFB1, HMOX1, LAMA2, MAPK11, CERS2, EFNB1, TSPO, SCN1B, SZT2, SBNO2, AP3D1, CSF1, TNFRSF25, ISG15, PGF, AKR1C3, PIEZO1, GFI1, PALM3, SYT11, APOE, TRPM2, GAS6, SCX, SEMA7A, SCRIB, SREBF1, NEO1, HYAL2, TRPM4, CDK19, TICAM1, PTCH1, TKFC, BOC, FAM129B, AP1B1, GCLM, MBD3, PITPNM1, CTSV, GPC1, HD…	BNIP3L, WIPF1, BCHE, WDR35, COL3A1, ERAP1, STAT1, NFE2L2, XPR1, HAT1, NOV, TNFRSF11B, TBC1D23, OPHN1, PDGFD, PIK3R1, GPRC5B, PHLDB2, GJA1, SNX3, EIF2A, ADNP, DNM1L, DDX21, EIF2AK2, RPL39, TBL1XR1, AP1S2, PDGFRA, PPP1CC, RYK, CLOCK, RBPJ, GPAM, PPP2R3C, MAP3K1, CREB1, USP14, STC2, CDKN2B, MTDH, PKD2, HPSE, SOCS5, ELMOD2, MATN2, TENT5A, AGL, FBXL3, LY96, ANKRD17, COL11A1, EFNB2, OMA1, PRKRA, PUM2, …
GO:0000187	activation of MAPK activity	79	3	0.58	103	0.0201	0.0201	1	1	The initiation of the activity of the inactive enzyme MAP kinase (MAPK)	0.844507	-0.997333	ADAM8, IKBKG, MAPK11, CSPG4, MADD, S1PR2, C1QTNF2, MAP2K3, DAB2IP, AXIN1, UBC, AKAP13, PTPN1, MAPK8IP3, DBNL, PDE6G, MAP3K11, MUL1, AVPI1, MAP3K10, MAP3K6, MAPKAPK2	UBE2N, MAP3K20, MAP4K5, SPAG9, MAP3K7, MAP2K4, IL1B, WNT5A, TAB2, HACD3, FGF2, IQGAP3, TLR4, TRAF6, MAP4K2, ERCC6, PRKAA1, LPAR1
GO:0023052	signaling	2942	30	21.6	785	0.02017	0.1821	1	1	The entirety of a process in which information is transmitted within a biological system. This process begins with an active signal and ends when a cellular response has been triggered	1.74772	-2.03048	CRYAB, SPNS2, HTRA1, TSPAN9, APLP1, ADAM11, LAG3, ADAM8, CARD9, TPGS1, TMEM65, TNFRSF19, BST2, AKAP10, AL928654.3, TIE1, LRP8, PSMA6, ADAMTS1, PIDD1, IKBKG, RHOF, KLF16, PREX1, EGLN2, FZD8, PPFIA3, CRTC1, ARAP1, ITGB4, STMN3, PANX2, NEURL1B, SUFU, RGS12, NPHP4, RHOBTB2, NOTCH1, FAM83G, SBK2, HTT, IGFBP2, TSPAN10, NPHP1, FGFR3, TGFB1, MEF2D, HMOX1, LAMA2, MAPK11, EFNB1, KIF13B, TSPO, SCN1B, SZT2, …	ITGB1, ZNF675, GEM, ARRDC3, UBE2D3, SH3BGRL, BNIP3L, WIPF1, ARPC5, SNRK, PSMD5, EEF1E1, ITGB3BP, PLPP5, BCHE, PPT1, DYRK1A, PTGES3, RHOQ, CUL5, WDR35, TERF2IP, TOPBP1, THRB, COL3A1, BICC1, ERAP1, STAT1, UBE2N, NFE2L2, XPR1, PHIP, IFT74, ZBTB33, C3orf58, NOV, NETO2, PDCD10, LINC02210-CRHR1, TNFRSF11B, LRRC1, OPHN1, FMN2, PDGFD, PIK3R1, PPP2R5E, TIAM2, GPRC5B, UBE2D2, GKAP1, GJA1, COL4A5, DVL3, CPE…
GO:0051646	mitochondrion localization	30	2	0.22	105	0.02023	0.0202	1	1	Any process in which a mitochondrion or mitochondria are transported to, and/or maintained in, a specific location within the cell	0.513472	-0.493641	CLUH, BRAT1, MAPT, MAP1S, MUL1, KAT2A	DNM1L, LRPPRC, SYNJ2BP, MSTO1, RHOT1
GO:0007154	cell communication	2951	30	21.67	659	0.02106	0.1456	1	1	Any process that mediates interactions between a cell and its surroundings. Encompasses interactions such as signaling or attachment between one cell and another cell, between a cell and an extracellular matrix, or between a cell and any other aspect of its environment	1.74772	-2.03048	CRYAB, SPNS2, HTRA1, TSPAN9, APLP1, ADAM11, LAG3, ADAM8, CARD9, TPGS1, TNFRSF19, BST2, AKAP10, AL928654.3, TIE1, LRP8, PSMA6, ADAMTS1, PIDD1, IKBKG, RHOF, KLF16, PREX1, EGLN2, FZD8, PPFIA3, CRTC1, ARAP1, ITGB4, STMN3, PANX2, NEURL1B, SUFU, RGS12, NPHP4, RHOBTB2, NOTCH1, FAM83G, SBK2, HTT, IGFBP2, TSPAN10, NPHP1, FGFR3, TGFB1, MEF2D, HMOX1, LAMA2, MAPK11, EFNB1, KIF13B, TSPO, SCN1B, SZT2, CSF1, GD…	ITGB1, ZNF675, GEM, ARRDC3, UBE2D3, SH3BGRL, BNIP3L, WIPF1, ARPC5, SNRK, PSMD5, EEF1E1, ITGB3BP, PLPP5, BCHE, PPT1, DYRK1A, PTGES3, RHOQ, CUL5, WDR35, TERF2IP, TOPBP1, THRB, COL3A1, BICC1, ERAP1, STAT1, UBE2N, NFE2L2, XPR1, PHIP, IFT74, ZBTB33, C3orf58, NOV, NETO2, PDCD10, LINC02210-CRHR1, TNFRSF11B, LRRC1, OPHN1, FMN2, PDGFD, PIK3R1, PPP2R5E, TIAM2, GPRC5B, UBE2D2, GKAP1, GJA1, COL4A5, DVL3, CPE…
GO:0002281	macrophage activation involved in immune...	3	1	0.02	107	0.02187	0.0219	1	1	A change in morphology and behavior of a macrophage resulting from exposure to a cytokine, chemokine, cellular ligand, or soluble factor, leading to the initiation or perpetuation of an immune response	0.62738	0.62738	SBNO2, TICAM1
GO:0002679	respiratory burst involved in defense re...	3	1	0.02	2067	0.02187	1	1	1	A phase of elevated metabolic activity, during which oxygen consumption increases made as part of a defense response ; this leads to the production, by an NADH dependent system, of hydrogen peroxide (H2O2), superoxide anions and hydroxyl radicals	0.314555	0.314555	RPS19, PIK3CD
GO:0002887	negative regulation of myeloid leukocyte...	3	1	0.02	2068	0.02187	1	1	1	Any process that stops, prevents, or reduces the frequency, rate, or extent of myeloid leukocyte mediated immunity	0.600682	0.600682	HMOX1, BCR
GO:0005997	xylulose metabolic process	3	1	0.02	108	0.02187	0.0219	1	1	The chemical reactions and pathways involving xylulose, the ketopentose threo-2-pentulose	0.347789	0.347789	TKT
GO:0021747	cochlear nucleus development	3	1	0.02	109	0.02187	0.0219	1	1	The process whose specific outcome is the progression of the cochlear nucleus over time, from its formation to the mature structure	0.21839	0.21839	SCRIB
GO:0030200	heparan sulfate proteoglycan catabolic p...	3	1	0.02	110	0.02187	0.0219	1	1	The chemical reactions and pathways resulting in the breakdown of proteoglycan containing heparan sulfate, any member of a group of glycosaminoglycans that have repeat units consisting of alternating alpha-(1->4) linked hexuronic acid and glucosamine residues, the former being a mixture of sulfated and nonsulfated D-glucuronic and L-iduronic acids, and the latter being either sulfated or acetylat…	0.0741268	0.0741268	GPC1, SGSH	HPSE
GO:0031915	positive regulation of synaptic plastici...	3	1	0.02	111	0.02187	0.0219	1	1	A process that increases synaptic plasticity, the ability of synapses to change as circumstances require. They may alter function, such as increasing or decreasing their sensitivity, or they may increase or decrease in actual numbers	0.356661	0.356661	ANAPC2
GO:0032762	mast cell cytokine production	3	1	0.02	112	0.02187	0.0219	1	1	Any process that contributes to cytokine production by a mast cell	0.05436	0.05436	HMOX1	BCL6
GO:0032763	regulation of mast cell cytokine product...	3	1	0.02	113	0.02187	0.0219	1	1	Any process that modulates the frequency, rate, or extent of mast cell cytokine production	0.05436	0.05436	HMOX1	BCL6
GO:0033004	negative regulation of mast cell activat...	3	1	0.02	2069	0.02187	1	1	1	Any process that stops, prevents, or reduces the frequency, rate, or extent of mast cell activation	0.169274	0.169274	HMOX1
GO:0042760	very long-chain fatty acid catabolic pro...	3	1	0.02	114	0.02187	0.0219	1	1	The chemical reactions and pathways resulting in the breakdown of a fatty acid which has a chain length greater than C22	0.155994	0.155994	SLC27A4, ABCD1	ABCD3
GO:0043301	negative regulation of leukocyte degranu...	3	1	0.02	2070	0.02187	1	1	1	Any process that stops, prevents, or reduces the rate of leukocyte degranulation	0.600682	0.600682	HMOX1, BCR
GO:0045716	positive regulation of low-density lipop...	3	1	0.02	115	0.02187	0.0219	1	1	Any process that activates or increases the frequency, rate or extent of the chemical reactions and pathways resulting in the formation of low-density lipoprotein receptors	0.257514	0.257514	CNPY2
GO:0048742	regulation of skeletal muscle fiber deve...	3	1	0.02	116	0.02187	0.0219	1	1	Any process that modulates the frequency, rate or extent of skeletal muscle fiber development. Muscle fibers are formed by the maturation of myotubes. They can be classed as slow, intermediate/fast or fast	0.207206	0.207206	FAM129B
GO:0048743	positive regulation of skeletal muscle f...	3	1	0.02	117	0.02187	0.0219	1	1	Any process that activates, maintains or increases the rate of skeletal muscle fiber development. Muscle fibers are formed by the maturation of myotubes. They can be classed as slow, intermediate/fast or fast	0.207206	0.207206	FAM129B
GO:0051006	positive regulation of lipoprotein lipas...	3	1	0.02	118	0.02187	0.0219	1	1	Any process that activates or increases the activity of the enzyme lipoprotein lipase	0.160502	0.160502	NR1H2	ABHD5
GO:0060268	negative regulation of respiratory burst	3	1	0.02	119	0.02187	0.0219	1	1	Any process that decreases the rate frequency or extent of a phase of elevated metabolic activity, during which oxygen consumption increases; this leads to the production, by an NADH dependent system, of hydrogen peroxide (H2O2), superoxide anions and hydroxyl radicals	0.375766	0.375766	RPS19, BCR
GO:0060331	negative regulation of response to inter...	3	1	0.02	120	0.02187	0.0219	1	1	Any process that decreases the rate, frequency or extent of a response to interferon-gamma. Response to interferon gamma is a change in state or activity of a cell or an organism (in terms of movement, secretion, enzyme production, gene expression, etc.) as a result of an interferon-gamma stimulus	0.303167	0.303167	NR1H2
GO:0060336	negative regulation of interferon-gamma-...	3	1	0.02	121	0.02187	0.0219	1	1	Any process that decreases the rate, frequency or extent of the series of molecular events generated as a consequence of interferon-gamma binding to a cell surface receptor	0.303167	0.303167	NR1H2
GO:0060369	positive regulation of Fc receptor media...	3	1	0.02	122	0.02187	0.0219	1	1	Any process that increases the rate, frequency or extent of the Fc receptor mediated stimulatory signaling pathway. The Fc receptor mediated stimulatory signaling pathway is a series of molecular signals generated as a consequence of a the binding of the Fc portion of an immunoglobulin by an Fc receptor capable of activating or perpetuating an immune response. The Fc portion of an immunoglobulin …	0.0201013	0.0201013	RAPGEF1	LYN
GO:0060456	positive regulation of digestive system ...	3	1	0.02	2071	0.02187	1	1	1	Any process that increases the frequency, rate or extent of a digestive system process, a physical, chemical, or biochemical process carried out by living organisms to break down ingested nutrients into components that may be easily absorbed and directed into metabolism	0.23148	0.23148	NR1H2, SLC22A5	TRPV1
GO:0061365	positive regulation of triglyceride lipa...	3	1	0.02	123	0.02187	0.0219	1	1	Any process that increases the activity of triglyceride lipase	0.160502	0.160502	NR1H2	ABHD5
GO:0090527	actin filament reorganization	3	1	0.02	2072	0.02187	1	1	1	A process that is carried out at the cellular level which results in dynamic structural changes to the arrangement of actin filaments	0.348214	0.348214	ARAP1
GO:1902512	positive regulation of apoptotic DNA fra...	3	1	0.02	124	0.02187	0.0219	1	1	Any process that activates or increases the frequency, rate or extent of apoptotic DNA fragmentation	0.242706	0.242706	HSF1
GO:1902775	mitochondrial large ribosomal subunit as...	3	1	0.02	125	0.02187	0.0219	1	1	The aggregation, arrangement and bonding together of a set of components to form a mitochondrial large ribosomal subunit	0.300091	0.300091	DDX28, DHX30	FASTKD2
GO:1903626	positive regulation of DNA catabolic pro...	3	1	0.02	126	0.02187	0.0219	1	1		0.242706	0.242706	HSF1
GO:1904116	response to vasopressin	3	1	0.02	127	0.02187	0.0219	1	1		0.507725	0.507725	RANGAP1, CDC6
GO:1904117	cellular response to vasopressin	3	1	0.02	128	0.02187	0.0219	1	1		0.507725	0.507725	RANGAP1, CDC6
GO:1990910	response to hypobaric hypoxia	3	1	0.02	129	0.02187	0.0219	1	1		-0.175688	-0.175688	HSF1	DNM1L
GO:2001033	negative regulation of double-strand bre...	3	1	0.02	130	0.02187	0.0219	1	1	Any process that stops, prevents or reduces the frequency, rate or extent of double-strand break repair via nonhomologous end joining	0.125289	0.125289	HSF1
GO:0001934	positive regulation of protein phosphory...	475	8	3.49	131	0.02222	0.0222	1	1	Any process that activates or increases the frequency, rate or extent of addition of phosphate groups to amino acids within a protein	1.15976	-1.37141	ADAM8, CARD9, TNFRSF19, LRP8, CCNK, PRKAR1B, IKBKG, FZD8, FGFR3, TGFB1, MAPK11, CSF1, CDK20, ABCA7, RAPGEF1, CLIP3, GAS6, CSPG4, MADD, SEMA7A, CDK9, SPHK1, MAGED1, STK11, BRAT1, S1PR2, KIF14, C1QTNF2, MAP2K3, DAB2IP, AXIN1, CAMKK1, SEMA4C, UBC, TELO2, TNK2, CARD10, AKAP13, DVL1, PTPN1, HRAS, HSF1, MAPK8IP3, RASSF2, PILRB, CSK, DGKQ, DBNL, MOB2, PDE6G, KISS1, MAP3K11, UCN, CDC6, PRKD2, TNFRSF1A, L…	TERF2IP, UBE2N, PDCD10, PDGFD, GPRC5B, DVL3, ARL6IP5, PFN2, PIBF1, MNAT1, ADNP, MAP3K20, HSPH1, EIF2AK2, FAM129A, PDGFRA, RYK, PPP2R3C, MAP3K1, PRKACB, PKD2, MAP4K5, PRKAR1A, SPAG9, STRADB, PRNP, IQGAP1, NRK, STK3, GDF6, MAP4K3, AREG, FBXW7, CCNH, MAP3K7, MAP2K4, EPHA4, IL1B, WNT5A, TAOK3, CCNC, GDF11, TAB2, YES1, COPS8, TTK, CALM2, CDKN1B, SIRT1, HDAC2, CCNT1, PSMD10, HACD3, AFAP1L2, TGFB2, RAP1…
GO:0034613	cellular protein localization	1295	16	9.51	210	0.02257	0.0399	1	1	Any process in which a protein is transported to, and/or maintained in, a specific location at the level of a cell. Localization at the cellular level encompasses movement within the cell, from within the cell to the cell surface, or from one location to another at the surface of a cell	1.05994	-1.85112	TSNARE1, WDR33, TOM1, IPO4, SUFU, TSPAN10, CROCC, TGFB1, TLN2, PPIL2, TAP1, KIF13B, TSPO, WRAP53, SZT2, AP3D1, AKR1C3, ABCA7, SYTL3, SIL1, SYT11, GLIS2, CLIP3, TAP2, APOE, PEX6, RANGAP1, GAS6, RAB11FIP3, SCRIB, SREBF1, TOLLIP, HYAL2, SPHK1, SPPL3, EXOC3, FLNA, RPL10, RAB11FIP5, THRA, STK11, PTCH1, RAB26, TBC1D22A, PARD6A, RPSA, PACS2, AP1B1, ZDHHC18, FAM126A, DNLZ, PLK3, KATNB1, TIMM44, MAPT, LAM…	ITGB1, CENPQ, UBE2D3, BNIP3L, SLU7, NEDD1, MTBP, AGFG1, RHOQ, WDR35, KPNA3, TERF2IP, PEX3, POT1, IFT74, NOV, RPGR, PIK3R1, SRP19, DVL3, CPE, HSP90AA1, PEX12, TRAM1, SRP9, YWHAZ, GOLPH3L, TMEM33, DNAJA1, PIBF1, SUMO1, DNM1L, UGCG, TIMM17A, HSPH1, TOMM20, CCDC14, HSPB11, SNX2, NPM1, RPL39, AP1S2, VPS36, SNX13, RPL15, ZFYVE16, RTN4, BLZF1, C2CD5, RAB10, NPEPPS, WDR75, REEP1, LYPLA1, NUP35, ICK, RAB6…
GO:0000462	maturation of SSU-rRNA from tricistronic...	32	2	0.23	132	0.02285	0.0229	1	1	Any process involved in the maturation of a precursor Small SubUnit (SSU) ribosomal RNA (rRNA) molecule into a mature SSU-rRNA molecule from the pre-rRNA molecule originally produced as a tricistronic rRNA transcript that contains the Small Subunit (SSU) rRNA, 5.8S rRNA, and the Large Subunit (LSU) in that order from 5' to 3' along the primary transcript	0.455166	-0.601485	TBL3, RPSA, RPS19, RPS21	UTP3, UTP23, MRPS9, HEATR1, DCAF13, UTP18, RPS24, UTP6
GO:0010647	positive regulation of cell communicatio...	871	12	6.4	401	0.02317	0.0779	1	1	Any process that increases the frequency, rate or extent of cell communication. Cell communication is the process that mediates interactions between a cell and its surroundings. Encompasses interactions such as signaling or attachment between one cell and another cell, between a cell and an extracellular matrix, or between a cell and any other aspect of its environment	1.18536	-1.64965	ADAM8, CARD9, TNFRSF19, BST2, PSMA6, PIDD1, IKBKG, FZD8, CRTC1, ARAP1, NOTCH1, HTT, FGFR3, TGFB1, HMOX1, LAMA2, MAPK11, CSF1, MC1R, AKR1C3, ABCA7, DAPK3, CTSH, RAPGEF1, GFI1, APOE, PLXNB1, FBXL15, GAS6, CSPG4, MADD, SEMA7A, NEO1, IGFBP5, HYAL2, SPHK1, MAGED1, SPPL3, FLNA, PSMB10, TRPM4, S100A4, STK11, TICAM1, RFNG, JPH2, S1PR2, LAMTOR4, C1QTNF2, MAP2K3, DAB2IP, JUP, AXIN1, SEMA4C, UBC, TELO2, SHF…	ARRDC3, SH3BGRL, PSMD5, EEF1E1, WDR35, TERF2IP, COL3A1, UBE2N, PHIP, NOV, PDCD10, PDGFD, PIK3R1, GPRC5B, GJA1, DVL3, ARL6IP5, YWHAZ, EIF2A, ATP2C1, TMEM33, PIBF1, MAP3K20, DNM1L, EIF2AK2, PSMD12, PDGFRA, RYK, PSMA4, RNF111, RTN4, RBPJ, CDKN2AIP, PSMC6, UBE3A, MAP3K1, CREB1, CDKN2B, TRIM13, MTDH, PKD2, HPSE, MAP4K5, SPAG9, RC3H1, PRNP, IQGAP1, NRK, STK3, GDF6, MAP4K3, FBXW7, PSMA1, LY96, GOLT1B, A…
GO:0045892	negative regulation of transcription, DN...	673	10	4.94	134	0.02394	0.0239	1	1	Any process that stops, prevents, or reduces the frequency, rate or extent of cellular DNA-templated transcription	0.99427	-1.66464	LRP8, KLF16, FZD8, SUFU, HES6, NOTCH1, TGFB1, SBNO2, ZNF219, CTNNBIP1, ZNF703, ZGLP1, BAHD1, TBX2, GFI1, GLIS2, HIC2, GAS6, SCX, SREBF1, MAGED1, FLNA, RPL10, SCMH1, THRA, PITX1, PTCH1, ZKSCAN3, USP3, FAM129B, CBX6, CCDC85B, MBD3, PLK3, GON4L, NR1H2, HDAC5, KLF12, PPM1F, DAB2IP, NELFB, AXIN1, ARHGAP35, ZHX2, MXD3, APBB1, SIRT6, UBC, KCNIP3, RECQL5, KMT2D, HINFP, CIC, HSF1, TNRC18, CEBPB, CBFA2T2, …	ZNF675, FAM220A, UBE2D3, THRB, STAT1, ZBTB33, HAT1, BAZ2A, ZBTB1, KDM5A, ZNF224, SUMO1, EED, RARB, BPTF, TRIM33, TBL1XR1, CGGBP1, CLOCK, RBPJ, UBA3, CREB1, HIST1H2AC, ZMYND11, PTPRK, MTDH, WWP1, CBX3, WWTR1, EPC1, UBP1, NFIL3, ZNF217, DKK1, MTERF3, BASP1, WNT5A, ZNF93, IRF2, CHCHD3, GLIS3, SMURF2, SIM2, CNBP, SAP30, STRAP, BTAF1, TRIM24, CDKN1B, SIRT1, GMNN, CNOT2, NFE2L3, SUZ12, URI1, ZNF639, SI…
GO:0070727	cellular macromolecule localization	1305	16	9.58	217	0.02411	0.0423	1	1	Any process in which a macromolecule is transported to, and/or maintained in, a specific location at the level of a cell. Localization at the cellular level encompasses movement within the cell, from within the cell to the cell surface, or from one location to another at the surface of a cell	1.05994	-1.85112	TSNARE1, WDR33, TOM1, IPO4, SUFU, TSPAN10, CROCC, TGFB1, TLN2, PPIL2, TAP1, KIF13B, TSPO, WRAP53, SZT2, AP3D1, AKR1C3, ABCA7, SYTL3, SIL1, SYT11, GLIS2, CLIP3, TAP2, APOE, PEX6, RANGAP1, GAS6, RAB11FIP3, SCRIB, SREBF1, TOLLIP, HYAL2, SPHK1, SPPL3, EXOC3, FLNA, RPL10, RAB11FIP5, THRA, STK11, PTCH1, RAB26, TBC1D22A, PARD6A, RPSA, PACS2, AP1B1, ZDHHC18, FAM126A, MEX3D, DNLZ, PLK3, KATNB1, TIMM44, MA…	ITGB1, CENPQ, UBE2D3, BNIP3L, SLU7, NEDD1, MTBP, AGFG1, RHOQ, WDR35, KPNA3, TERF2IP, PEX3, POT1, IFT74, NOV, RPGR, PIK3R1, SRP19, DVL3, CPE, HSP90AA1, PEX12, TRAM1, SRP9, YWHAZ, GOLPH3L, TMEM33, DNAJA1, PIBF1, SUMO1, DNM1L, UGCG, TIMM17A, HSPH1, TOMM20, CCDC14, HSPB11, SNX2, NPM1, RPL39, AP1S2, VPS36, SNX13, RPL15, ZFYVE16, RTN4, BLZF1, C2CD5, RAB10, NPEPPS, WDR75, REEP1, LYPLA1, NUP35, ICK, RAB6…
GO:0031401	positive regulation of protein modificat...	675	10	4.96	135	0.02439	0.0244	1	1	Any process that activates or increases the frequency, rate or extent of the covalent alteration of one or more amino acid residues within a protein	1.1838	-1.56748	ADAM8, CARD9, TNFRSF19, LRP8, CCNK, PSMA6, PRKAR1B, IKBKG, FZD8, FGFR3, TGFB1, MAPK11, CSF1, CDK20, ABCA7, RAPGEF1, CLIP3, ANAPC2, GAS6, CSPG4, MADD, SEMA7A, CDK9, SREBF1, TOLLIP, SPHK1, MAGED1, SPPL3, PSMB10, PTPA, STK11, TICAM1, BRAT1, S1PR2, KIF14, C1QTNF2, MAP2K3, DAB2IP, AXIN1, CAMKK1, SEMA4C, RAMP1, UBC, TELO2, TNK2, CARD10, AKAP13, XIAP, DVL1, AMER1, PTPN1, HRAS, HSF1, CCDC22, MAPK8IP3, SY…	ARRDC3, PSMD5, DCUN1D4, DYRK1A, TERF2IP, UBE2N, PDCD10, PDGFD, GPRC5B, DVL3, ARL6IP5, PFN2, PIBF1, MNAT1, ADNP, MAP3K20, EED, HSPH1, EIF2AK2, PSMD12, DCUN1D5, FAM129A, PDGFRA, RYK, PSMA4, RNF20, RNF111, PSMC6, PPP2R3C, UBE3A, MAP3K1, PRKACB, CDC27, TOPORS, CDC23, PKD2, MAP4K5, PRKAR1A, SPAG9, STRADB, PRNP, IQGAP1, NRK, STK3, GDF6, MAP4K3, AREG, FBXW7, PSMA1, CCNH, MAP3K7, RWDD3, MAP2K4, PPP1R12A,…
GO:0051234	establishment of localization	2857	29	20.98	466	0.02459	0.0937	1	1	The directed movement of a cell, substance or cellular entity, such as a protein complex or organelle, to a specific location	1.71679	-2.0633	CRYAB, SPNS2, SPP1, TSNARE1, TMEM38A, APLP1, ADAM8, BST2, LRP8, PSMA6, IKBKG, RHOF, WDR33, PPFIA3, TOM1, SLC9B1, IPO4, OSBPL5, PANX2, NEURL1B, SUFU, SLC27A4, NOTCH1, HTT, TSPAN10, ELMO3, SLC19A1, CROCC, SLC9A5, A1BG, TGFB1, HMOX1, MAPK11, ABCB9, SLC26A1, RAB4B-EGLN2, TRPV2, TAP1, KIF13B, TSPO, SCN1B, WRAP53, CALHM2, NACAD, AP3D1, IMPDH1, ATAD3B, CLCN7, SLC4A11, PDXK, SLC35F6, TRPC4AP, AKR1C3, SLC…	ITGB1, YPEL5, CENPQ, GEM, CD58, UBE2D3, BNIP3L, TMEM184C, WIPF1, ARPC5, ATP5F1EP2, SLU7, PSMD5, DNAJC28, AGFG1, PPT1, RHOQ, SLC39A6, CUL5, WDR35, KPNA3, CLVS1, UTRN, EXOC5, IREB2, PEX3, CADM1, NFE2L2, XPR1, POT1, IFT74, SLC25A46, DCTN4, NOV, NETO2, RPGR, PDCD10, LINC02210-CRHR1, SNX14, OPHN1, TMEM167A, FMN2, PIK3R1, SRP19, NUSAP1, ARMC1, PHLDB2, GJA1, CHMP2B, HSP90AA1, ARL6IP5, PEX12, TRAM1, PFN2…
GO:0050900	leukocyte migration	151	4	1.11	136	0.02466	0.0247	1	1	The movement of a leukocyte within or between different tissues and organs of the body	1.08384	-1.35669	SPNS2, ADAM8, PREX1, TGFB1, HMOX1, PPIL2, CSF1, PGF, TRPM2, GAS6, TRPM4, SLC7A11, GPC1, RPS19, SDC3, WASL, HRAS, BCR, SLC3A2, BDKRB1, NBL1, STAT5B, IL17RC, IL17RA, CD34, STK10, HRH1, PIK3CD, ITGB3, CORO1A	ITGB1, CD58, NOV, PDGFD, PIK3R1, ITGA4, PSG1, IL1B, CD47, WNT5A, JAM2, PROS1, YES1, ITGA6, GRB14, SBDS, TGFB2, SLC16A1, ROCK1, CDC42, CD44, LYN, GCNT1, AC068234.1, ADAM10, IL6, EPS8, GATA3, JAGN1
GO:0032270	positive regulation of cellular protein ...	880	12	6.46	137	0.02489	0.0249	1	1	Any process that activates or increases the frequency, rate or extent of the chemical reactions and pathways involving a protein, occurring at the level of an individual cell	1.20411	-1.6219	ADAM8, CARD9, TNFRSF19, LRP8, CCNK, PSMA6, PIDD1, PRKAR1B, IKBKG, FZD8, FGFR3, TGFB1, MAPK11, CSF1, CDK20, ABCA7, CTSH, RAPGEF1, CLIP3, APOE, ANAPC2, GAS6, CSPG4, MADD, SEMA7A, CDK9, SREBF1, TOLLIP, SPHK1, MAGED1, SPPL3, PSMB10, PTPA, STK11, TICAM1, MAPK12, BRAT1, S1PR2, PLK3, MAPT, KIF14, C1QTNF2, MAP2K3, NR1H2, PPM1F, DAB2IP, RNF166, AXIN1, CAMKK1, SEMA4C, CLN6, RAMP1, UBC, TELO2, TNK2, CARD10,…	ARRDC3, PSMD5, DCUN1D4, DYRK1A, WDR35, EIF3E, TERF2IP, UBE2N, NFE2L2, PDCD10, PDGFD, GPRC5B, DVL3, ARL6IP5, PAIP1, PFN2, PIBF1, MNAT1, SUMO1, ADNP, MAP3K20, EED, HSPH1, EIF2AK2, PSMD12, NPM1, DCUN1D5, FAM129A, PDGFRA, RYK, PSMA4, RNF20, RNF111, PSMC6, PPP2R3C, UBE3A, MAP3K1, PRKACB, CDC27, TOPORS, CARD8, CDC23, PKD2, MAP4K5, SOCS5, PRKAR1A, SPAG9, STRADB, PRNP, IQGAP1, NRK, STK3, GDF6, MAP4K3, AR…
GO:0010629	negative regulation of gene expression	1094	14	8.03	138	0.02536	0.0254	1	1	Any process that decreases the frequency, rate or extent of gene expression. Gene expression is the process in which a gene's coding sequence is converted into a mature gene product or products (proteins or RNA). This includes the production of an RNA transcript as well as any processing to produce a mature RNA product or an mRNA (for protein-coding genes) and the translation of that mRNA into pr…	1.00581	-1.74701	LRP8, KLF16, FZD8, SUFU, HES6, EXOSC6, NOTCH1, TGFB1, SBNO2, ZNF219, CTNNBIP1, CNPY2, ZNF703, DAPK3, ZGLP1, BAHD1, TBX2, PC, GFI1, GLIS2, HIC2, RNH1, GAS6, SCX, CDK9, SREBF1, IGFBP5, MAGED1, FLNA, RPL10, SCMH1, THRA, PITX1, PTCH1, ZKSCAN3, USP3, FAM129B, RPSA, CBX6, CCDC85B, MEX3D, MBD3, PLK3, GON4L, NR1H2, HDAC5, KLF12, PNPT1, PPM1F, DAB2IP, ACACB, NELFB, AXIN1, ARHGAP35, RPS19, ZHX2, MXD3, APBB…	ZNF675, FAM220A, UBE2D3, RNASEH2B, DYRK1A, WDR35, EIF3E, THRB, IREB2, STAT1, ZBTB33, PTBP3, HAT1, BAZ2A, TENT2, PDCD10, ZBTB1, KDM5A, PAIP1, GSPT1, ZNF224, SRP9, SUMO1, ADNP, EED, RARB, GSPT2, EIF2AK2, BPTF, RPL39, TRIM33, TBL1XR1, CGGBP1, PNRC2, RPL15, TSN, RNF20, CLOCK, RBPJ, UBA3, CREB1, HIST1H2AC, NUP35, STC2, CNOT8, ZMYND11, TRIM13, PTPRK, MTDH, WWP1, CBX3, WWTR1, EPC1, RC3H1, NUPL2, PRNP, U…
GO:0006027	glycosaminoglycan catabolic process	34	2	0.25	139	0.02561	0.0256	1	1	The chemical reactions and pathways resulting in the breakdown of glycosaminoglycans, any one of a group of polysaccharides that contain amino sugars	0.67989	-0.739423	TGFB1, CSPG4, HYAL2, GPC1, HSPG2, SDC3, NAGLU, GPC2, IDUA, SGSH, HGSNAT, HYAL3, AGRN	VCAN, HPSE, HMMR, GPC5, LUM, FGF2, CD44, CHP1, HEXB
GO:0006939	smooth muscle contraction	34	2	0.25	2073	0.02561	1	1	1	A process in which force is generated within smooth muscle tissue, resulting in a change in muscle geometry. Force generation involves a chemo-mechanical energy conversion step that is carried out by the actin/myosin complex activity, which generates force through ATP hydrolysis. Smooth muscle differs from striated muscle in the much higher actin/myosin ratio, the absence of conspicuous sarcomere…	0.40319	-0.620399	DAPK3, SPHK1, ACTA2, CTTN, SMTN	MYLK, OXTR, RGS2, ROCK1, RAP1GDS1, PIK3C2A, TRPV1, KCNMA1, TPCN2
GO:0043087	regulation of GTPase activity	397	7	2.91	915	0.0257	0.2262	1	1	Any process that modulates the rate of GTP hydrolysis by a GTPase	0.926846	-1.46585	PREX1, ARAP1, STMN3, RGS12, FGFR3, SBF1, RGS3, DENND4A, RAPGEF1, PLXNB1, RANGAP1, MADD, SCRIB, PLEKHG4, ARHGEF10L, VPS9D1, PLEKHG3, AGAP6, RABEP2, TBC1D22A, RAP1GAP2, TRAPPC9, ARHGEF19, LAMTOR4, RALGDS, ARHGEF4, VAV2, DAB2IP, AXIN1, ARHGAP35, GMIP, TBC1D14, TBCD, SIPA1L3, ARFGAP1, RGS20, DEPDC5, TNK2, PLXNB2, AKAP13, DENND3, TBC1D13, TRAPPC6A, DOCK6, GNB5, HRAS, DENND4C, BCR, SRGAP2, RAPGEFL1, DE…	ITGB1, AGFG1, RPGR, OPHN1, TIAM2, DVL3, FBXO8, DNM1L, ASAP2, PDGFRA, TRAPPC6B, DEPDC7, SNX13, AC091057.1, RCBTB2, DENND6A, IQGAP1, RASA1, ELMOD2, SMAP1, DIS3, GNA13, EPHA4, ARF4, ARHGAP5, WNT5A, FAM13B, CHML, SRGAP2C, EIF5, GDI2, SOS2, CDC42EP3, CALM2, DOCK11, ITGA6, MET, HACD3, RGS2, ARHGAP11A, TBC1D12, EIF2S1, DNMBP, SH3BP4, TMED2, JAK1, FGF2, DEPDC1, EGFR, BNIP2, PLEKHG7, TBCK, TBC1D8, GIT2, N…
GO:0001525	angiogenesis	229	5	1.68	1641	0.02607	0.5524	1	1	Blood vessel formation when new vessels emerge from the proliferation of pre-existing blood vessels	0.963775	-1.43065	ADAM8, TIE1, FZD8, NOTCH1, HMOX1, PGF, CTSH, RNH1, CSPG4, SPHK1, PLCD1, FAM129B, HDAC5, VAV2, TGFBI, HSPG2, DAB2IP, EGFL7, RAMP1, SIRT6, TNFSF12, LAMA5, COL18A1, NFATC4, AAMP, HHEX, E2F8, POFUT1, PRKD2, PPP3R1, ADGRB2, FZD5, CD34, VEZF1, FMNL3, FOXO4, ANG, PDGFRB, ENG, PNPLA6, ADAM15, EPHA1, HIPK1, ITGB3, RUNX1	ITGB1, ERAP1, STAT1, NFE2L2, NOV, PDCD10, PDGFRA, RBPJ, MTDH, HPSE, UBP1, CLIC4, CYP1B1, GNA13, EFNB2, IL1B, WNT5A, APOLD1, NUS1, SIRT1, C1GALT1, HOXA3, DDAH1, KRIT1, TGFB2, ROCK1, JAK1, FGF2, CDC42, MEIS1, SYNJ2BP, ISL1, STK4, PRKD1, ANXA3, SEMA5A, PTK2, COL8A1, PARVA, CCBE1, TNFAIP3, AC068234.1, TGFBR1, EGLN1, KLF4, EMP2, PRCP, COL4A1, SERPINF1, IL6, LOXL2, RGCC, ATP5IF1
GO:0051090	regulation of sequence-specific DNA bind...	230	5	1.69	1771	0.0265	0.6471	1	1	Any process that modulates the frequency, rate or extent of the activity of a transcription factor, any factor involved in the initiation or regulation of transcription	1.09049	-1.37131	ADAM8, LRP8, PSMA6, PIDD1, IKBKG, CRTC1, SUFU, TGFB1, HMOX1, MAPK11, CTNNBIP1, GFI1, GLIS2, GAS6, SPHK1, FLNA, TICAM1, PTCH1, TRAPPC9, HDAC5, DAB2IP, JUP, UBC, WWP2, TAF6L, TRADD, AMH, CACTIN, PPP2R5B, PRKD2, WFS1, FZD2, MAPK9, HSPA1B, CRTC2, NLRP3, FANCA, NLRC5, MAP3K10	ZNF675, TERF2IP, UBE2N, KDM5A, SUMO1, EIF2AK2, NPM1, MED13, CLOCK, MBTPS2, TRIM13, MTDH, PRNP, STK3, CYP1B1, MAP3K7, RWDD3, IL1B, WNT5A, TAB2, SIRT1, HDAC2, ATF2, ZIC2, PSMD10, RNF2, RB1, MAP3K13, TRIM37, SGK3, PRKD1, ANXA3, TLR4, PRKCI, TCEAL7, MAPK8, TRAF6, TRIM52, PRDX3, TNFAIP3, EP300, EGLN1, GTF2A2, KLF4, TAF1, COMMD6, ARID5B, IL6, TRIM8, CHP1, RGCC, TAF12, BUD31
GO:0006026	aminoglycan catabolic process	35	2	0.26	142	0.02703	0.027	1	1	The chemical reactions and pathways resulting in the breakdown of aminoglycans, any polymer containing amino groups that consists of more than about 10 monosaccharide residues joined to each other by glycosidic linkages	0.67989	-0.765272	TGFB1, CSPG4, HYAL2, GPC1, HSPG2, SDC3, NAGLU, GPC2, IDUA, SGSH, HGSNAT, HYAL3, AGRN	VCAN, HPSE, HMMR, GPC5, LUM, FGF2, CTBS, CD44, CHP1, HEXB
GO:0045844	positive regulation of striated muscle t...	35	2	0.26	2074	0.02703	1	1	1	Any process that activates or increases the frequency, rate or extent of striated muscle development	0.543424	-0.70632	NOTCH1, TGFB1, TBX2, FAM129B, GPC1	MKL2, RBPJ, CREB1, EFNB2, FGF2, PRKAA1, CCNB1, RPS6KB1
GO:0046686	response to cadmium ion	35	2	0.26	2075	0.02703	1	1	1	Any process that results in a change in state or activity of a cell or an organism (in terms of movement, secretion, enzyme production, gene expression, etc.) as a result of a cadmium (Cd) ion stimulus	0.526661	-0.674624	HMOX1, AKR1C3, SLC30A1, HSF1, MT1F, MAPK9	SUMO1, PRNP, PCNA, CDKN1B, B2M, EGFR, MAPK8, GCLC
GO:0048636	positive regulation of muscle organ deve...	35	2	0.26	2076	0.02703	1	1	1	Any process that activates, maintains or increases the rate of muscle development	0.543424	-0.70632	NOTCH1, TGFB1, TBX2, FAM129B, GPC1	MKL2, RBPJ, CREB1, EFNB2, FGF2, PRKAA1, CCNB1, RPS6KB1
GO:1901863	positive regulation of muscle tissue dev...	35	2	0.26	2077	0.02703	1	1	1	Any process that activates or increases the frequency, rate or extent of muscle tissue development	0.543424	-0.70632	NOTCH1, TGFB1, TBX2, FAM129B, GPC1	MKL2, RBPJ, CREB1, EFNB2, FGF2, PRKAA1, CCNB1, RPS6KB1
GO:1902041	regulation of extrinsic apoptotic signal...	35	2	0.26	143	0.02703	0.027	1	1	Any process that modulates the frequency, rate or extent of extrinsic apoptotic signaling pathway via death domain receptors	0.54543	-0.495152	PIDD1, HMOX1, MADD, TRADD, BCL2L1	RFFL, STK3, STK4, TNFAIP3
GO:0002697	regulation of immune effector process	156	4	1.15	1120	0.02738	0.3	1	1	Any process that modulates the frequency, rate, or extent of an immune effector process	1.07586	-1.15045	HTRA1, LAG3, BST2, EXOSC6, TGFB1, HMOX1, RAPGEF1, SEMA7A, TRPM4, HLX, TKFC, AP1B1, RPS19, BCR, TARBP2, GAB2, RNF216, AP1M1, STAT5B, FZD5, SUPT6H, NLRP3, IL27RA, MUL1, ATAD5	CADM1, ZBTB1, GPRC5B, EIF2AK2, AP1S2, SOCS5, RC3H1, ELMOD2, ANKRD17, MAP3K7, PUM2, IL1B, WNT5A, PUM1, PROS1, B2M, MSH6, SIN3A, MSH2, BIRC2, EXOSC3, VAMP7, SNX4, TGFB2, LYN, ATG5, AP1G1, TSPAN6, HSPD1, TLR4, BCL6, UNG, CD46, TRAF6, STYK1, THOC1, TRIM6, TNFAIP3, CD59, IL6, GATA3, MICB, C4BPB
GO:0002262	myeloid cell homeostasis	89	3	0.65	620	0.02742	0.1329	1	1	The process of regulating the proliferation and elimination of myeloid cells such that the total number of myeloid cells within a whole or part of an organism is stable over time in the absence of an outside stimulus	0.649651	-0.795374	HMOX1, ISG15, THRA, ZNF16, RPS19, BAP1, P4HTM, STAT5B, BAK1, PIK3CD, HOXB6	PTBP3, SMAP1, ZFP36L1, B2M, RB1, ACVR2A, SENP1, SLC11A2, LYN, AXL, CDK6, NCSTN, BCL6, HSPA9, RPS24, IL6, GATA3, ATP5IF1, SMAD5
GO:0005975	carbohydrate metabolic process	315	6	2.31	1102	0.02753	0.2959	1	1	The chemical reactions and pathways involving carbohydrates, any of a group of organic compounds based of the general formula Cx(H2O)y. Includes the formation of carbohydrate derivatives by the addition of a carbohydrate residue to another molecule	0.887872	-1.1166	B3GNT3, IPPK, H6PD, TGFB1, PIGQ, PC, STK40, WDR5, IGFBP5, MAN2C1, HYAL2, TKFC, INPP5E, CPT1A, BRAT1, PFKL, C1QTNF2, PYGB, ACACB, TKT, SLC25A10, SIRT6, GAA, UBC, AMDHD2, PGGHG, GLYCTK, GALK1, NAGPA, ALDH2, PMM1, SLC3A2, IDUA, DPM3, DGKQ, PFKFB4, ST6GALNAC6, PPARD, ME1, OGDH, POFUT1, NEU3, STBD1, PCK2, CHID1, B4GALT7, B3GAT3, ST3GAL5, PTH1R, NISCH, PHKA2, GAL3ST4, ISYNA1, IGFBP4, CRTC2, SESN2, BAD,…	PGM3, GPD2, UGP2, ARPP19, PPP1CC, KAT2B, AGL, HAS2, OMA1, CALM2, SIRT1, PPP1CB, FUCA2, ST6GALNAC5, GYG1, ADIPOR1, IDH3A, SLC35A1, B4GALT6, SDHAF3, COX11, SLC25A13, ABHD10, ALDH5A1, PPP1R2, CTBS, SIAE, GNPDA2, IMPAD1, BPGM, PDHB, FUT8, SERP1, RPE, ALDH1B1, B3GLCT, GK, CS, PGM2, COQ2, GALNT7, DUSP12, B3GAT2, MAN2A1, IMPA1, GPD1L, PRKAA1, UEVLD, IL6, GCLC, HEXB, B4GALT4, MYORG
GO:0050793	regulation of developmental process	1217	15	8.94	877	0.02793	0.2125	1	1	Any process that modulates the frequency, rate or extent of development, the biological process whose specific outcome is the progression of a multicellular organism over time from an initial condition (e.g. a zygote, or a young adult) to a later condition (e.g. a multicellular animal or an aged adult)	1.18395	-1.74354	SPP1, ADAM8, TIE1, LRP8, PSMA6, PREX1, CRTC1, ARAP1, SUFU, EXOSC6, NOTCH1, FGFR3, TGFB1, HMOX1, LAMA2, MAPK11, CERS2, TRPV2, KIF13B, TSPO, SCN1B, AP3D1, SDK1, CSF1, GDPD5, ISG15, LZTS1, PGF, CTNNBIP1, ZNF703, BIN1, DAPK3, CTSH, RAPGEF1, TBX2, GFI1, WASF3, APOE, PLXNB1, ANAPC2, RNH1, GAS6, SCX, SEMA7A, CDK9, ANKH, IGFBP5, ZBTB7B, SPHK1, MAGED1, NCS1, FLNA, PSMB10, TRPM4, HLX, THRA, STK11, ZNF16, P…	ITGB1, ZNF675, PSMD5, EEF1E1, RHOQ, COL3A1, ERAP1, STAT1, NFE2L2, ZMYM6, PHIP, PTBP3, NOV, PDCD10, TNFRSF11B, ZBTB1, PDGFD, PIK3R1, GPRC5B, PHLDB2, GJA1, DVL3, MKL2, LRRC17, SNX3, ADNP, EED, RARB, DNM1L, EIF2AK2, COL5A2, PSMD12, PDGFRA, RYK, PSMA4, CLOCK, RTN4, RBPJ, GPAM, CDC7, PSMC6, PPP2R3C, CREB1, PRKACB, STC2, MARCH7, ABCA5, MTDH, HPSE, WWTR1, SOCS5, SPAG9, ATP11C, RC3H1, IQGAP1, NRK, STK3, …
GO:0042327	positive regulation of phosphorylation	497	8	3.65	144	0.0282	0.0282	1	1	Any process that activates or increases the frequency, rate or extent of addition of phosphate groups to a molecule	1.15976	-1.40638	ADAM8, CARD9, TNFRSF19, LRP8, CCNK, PRKAR1B, IKBKG, FZD8, FGFR3, TGFB1, MAPK11, CSF1, CDK20, ABCA7, RAPGEF1, CLIP3, GAS6, CSPG4, MADD, SEMA7A, CDK9, SPHK1, MAGED1, STK11, ZNF16, BRAT1, S1PR2, MAPT, KIF14, C1QTNF2, MAP2K3, VAV2, DAB2IP, AXIN1, CAMKK1, SEMA4C, UBC, TELO2, TNK2, CARD10, AKAP13, DVL1, PTPN1, HRAS, HSF1, MAPK8IP3, RASSF2, PILRB, CSK, AMBRA1, DGKQ, DBNL, MOB2, PDE6G, KISS1, MAP3K11, UC…	PTGES3, TERF2IP, UBE2N, PDCD10, PDGFD, GPRC5B, DVL3, ARL6IP5, PFN2, PIBF1, MNAT1, ADNP, MAP3K20, HSPH1, EIF2AK2, FAM129A, MOB1B, PDGFRA, GLMN, RYK, PPP2R3C, MAP3K1, PRKACB, PKD2, MAP4K5, PRKAR1A, SPAG9, STRADB, PRNP, IQGAP1, NRK, STK3, GDF6, MAP4K3, AREG, FBXW7, CCNH, MAP3K7, MAP2K4, EPHA4, IL1B, WNT5A, TAOK3, CCNC, GDF11, TAB2, YES1, COPS8, TTK, CALM2, CDKN1B, ITGA6, SIRT1, HDAC2, CCNT1, PSMD10,…
GO:0008593	regulation of Notch signaling pathway	36	2	0.26	145	0.02849	0.0285	1	1	Any process that modulates the frequency, rate or extent of the Notch signaling pathway	0.63445	-0.74283	NOTCH1, GDPD5, RFNG, FAM129B, EGFL7, CBFA2T2, SLC35C2, LFNG	NOV, PDCD10, FBXW7, ZMIZ1, SYNJ2BP, BMP2K, BCL6, CD46, NEPRO
GO:0043410	positive regulation of MAPK cascade	235	5	1.73	146	0.02873	0.0287	1	1	Any process that activates or increases the frequency, rate or extent of signal transduction mediated by the MAPK cascade	1.06443	-1.28661	ADAM8, CARD9, TNFRSF19, IKBKG, FZD8, FGFR3, TGFB1, MAPK11, ABCA7, RAPGEF1, GAS6, CSPG4, MADD, SEMA7A, MAGED1, S1PR2, C1QTNF2, MAP2K3, DAB2IP, AXIN1, SEMA4C, UBC, AKAP13, PTPN1, HRAS, MAPK8IP3, RASSF2, CSK, DBNL, PDE6G, KISS1, MAP3K11, PRKD2, LIF, FZD5, PSAP, CDK10, IGFBP4, TIAM1, MUL1, PDGFRB, AVPI1, MAP3K10, MAP3K6, MAPKAPK2	UBE2N, PDCD10, PDGFD, DVL3, ARL6IP5, MAP3K20, EIF2AK2, PDGFRA, RYK, MAP3K1, MAP4K5, SPAG9, IQGAP1, NRK, STK3, GDF6, MAP4K3, FBXW7, MAP3K7, MAP2K4, EPHA4, IL1B, WNT5A, TAOK3, TAB2, HACD3, TGFB2, RAP1B, FGF2, EGFR, CDC42, MAP3K13, CD24, SDCBP, CD44, SPRY2, IQGAP3, TLR4, TRAF6, MAP4K2, RAPGEF2, TGFBR1, ERCC6, GADD45A, PRKAA1, IL6, PDGFC, LPAR1
GO:0006787	porphyrin-containing compound catabolic ...	4	1	0.03	147	0.02905	0.0291	1	1	The chemical reactions and pathways resulting in the breakdown of any member of a large group of derivatives or analogs of porphyrin. Porphyrin consists of a ring of four pyrrole nuclei linked each to the next at their alpha positions through a methine group	0.301984	0.301984	HMOX1
GO:0019322	pentose biosynthetic process	4	1	0.03	148	0.02905	0.0291	1	1	The chemical reactions and pathways resulting in the formation of a pentose, any monosaccharide with a chain of five carbon atoms in the molecule	0.199117	0.199117	TKT
GO:0021548	pons development	4	1	0.03	149	0.02905	0.0291	1	1	The process whose specific outcome is the progression of the pons over time, from its formation to the mature structure. The pons lies above the medulla and next to the cerebellum. The pons conveys information about movement from the cerebral hemisphere to the cerebellum	0.238841	0.238841	SCRIB
GO:0030167	proteoglycan catabolic process	4	1	0.03	150	0.02905	0.0291	1	1	The chemical reactions and pathways resulting in the breakdown of proteoglycans, any glycoprotein in which the carbohydrate units are glycosaminoglycans	-0.0410913	-0.0410913	GPC1, SGSH	HPSE
GO:0032202	telomere assembly	4	1	0.03	2078	0.02905	1	1	1	A cellular process that results in the aggregation, arrangement and bonding together of a set of components to form a telomere at a non-telomeric double-stranded DNA end. A telomere is a terminal region of a linear chromosome that includes telomeric DNA repeats and associated proteins	-0.129267	-0.129267	WRAP53	POT1
GO:0033015	tetrapyrrole catabolic process	4	1	0.03	151	0.02905	0.0291	1	1	The chemical reactions and pathways leading to the breakdown of tetrapyrroles, natural pigments containing four pyrrole rings joined by one-carbon units linking position 2 of one pyrrole ring to position 5 of the next	0.301984	0.301984	HMOX1
GO:0033299	secretion of lysosomal enzymes	4	1	0.03	2079	0.02905	1	1	1	The controlled release of lysosomal enzymes by a cell	0.375483	0.375483	NR1H2, NAGPA
GO:0035521	monoubiquitinated histone deubiquitinati...	4	1	0.03	152	0.02905	0.0291	1	1	The removal of the ubiquitin group from a monoubiquitinated histone protein	-0.0646801	-0.0646801	BAP1	USP16, MYSM1
GO:0035522	monoubiquitinated histone H2A deubiquiti...	4	1	0.03	153	0.02905	0.0291	1	1	The removal of the ubiquitin group from a monoubiquitinated histone H2A protein	-0.0646801	-0.0646801	BAP1	USP16, MYSM1
GO:0035864	response to potassium ion	4	1	0.03	154	0.02905	0.0291	1	1	Any process that results in a change in state or activity of a cell or an organism (in terms of movement, secretion, enzyme production, gene expression, etc.) as a result of a potassium ion stimulus	0.0719412	0.0719412	HSF1
GO:0042167	heme catabolic process	4	1	0.03	155	0.02905	0.0291	1	1	The chemical reactions and pathways resulting in the breakdown of heme, any compound of iron complexed in a porphyrin (tetrapyrrole) ring	0.301984	0.301984	HMOX1
GO:0043615	astrocyte cell migration	4	1	0.03	156	0.02905	0.0291	1	1	The orderly movement of an astrocyte, a class of large neuroglial (macroglial) cells in the central nervous system, the largest and most numerous neuroglial cells in the brain and spinal cord	0.0756887	0.0756887	SCRIB	HEXB
GO:0044539	long-chain fatty acid import	4	1	0.03	157	0.02905	0.0291	1	1	The directed movement of long-chain fatty acids into a cell or organelle. A long-chain fatty acid is a fatty acid with a chain length between C13 and C22	-0.131538	-0.131538	SLC27A4	SPX, ACSL3
GO:0045217	cell-cell junction maintenance	4	1	0.03	158	0.02905	0.0291	1	1	The maintenance of junctions between cells	0.205246	0.205246	KIFC3, PARD6A	PLEKHA7
GO:0046149	pigment catabolic process	4	1	0.03	159	0.02905	0.0291	1	1	The chemical reactions and pathways resulting in the breakdown of a pigment, any general or particular coloring matter in living organisms, e.g. melanin	0.301984	0.301984	HMOX1
GO:0048550	negative regulation of pinocytosis	4	1	0.03	160	0.02905	0.0291	1	1	Any process that stops, prevents, or reduces the frequency, rate or extent of pinocytosis. Pinocytosis is the process in which cells take in liquid material from their external environment; literally 'cell drinking'. Liquid is enclosed in vesicles, formed by invagination of the plasma membrane. These vesicles then move into the cell and pass their contents to endosomes	0.314261	0.314261	NR1H2
GO:0051004	regulation of lipoprotein lipase activit...	4	1	0.03	161	0.02905	0.0291	1	1	Any process that modulates the activity of the enzyme lipoprotein lipase	0.0611487	0.0611487	NR1H2	ABHD5
GO:0060088	auditory receptor cell stereocilium orga...	4	1	0.03	162	0.02905	0.0291	1	1	A process that is carried out at the cellular level which results in the assembly, arrangement of constituent parts, or disassembly of a stereocilium. A stereocilium is an actin-based protrusion from the apical surface of auditory hair cells	0.0698535	0.0698535	SCRIB
GO:0060136	embryonic process involved in female pre...	4	1	0.03	163	0.02905	0.0291	1	1	A reproductive process occurring in the embryo or fetus that allows the embryo or fetus to develop within the mother	-0.00851839	-0.00851839	HSF1, JUNB	ACSL4
GO:0061668	mitochondrial ribosome assembly	4	1	0.03	164	0.02905	0.0291	1	1		0.203424	0.203424	DDX28, DHX30	FASTKD2
GO:0071281	cellular response to iron ion	4	1	0.03	2080	0.02905	1	1	1	Any process that results in a change in state or activity of a cell (in terms of movement, secretion, enzyme production, gene expression, etc.) as a result of an iron ion stimulus	-0.207861	-0.207861	HMOX1	B2M, TFAP2A, CCNB1
GO:0090129	positive regulation of synapse maturatio...	4	1	0.03	165	0.02905	0.0291	1	1	Any process that increases the extent of synapse maturation, the process that organizes a synapse so that it attains its fully functional state	0.307461	0.307461	ANAPC2, DAB2IP	NRXN3
GO:0090186	regulation of pancreatic juice secretion	4	1	0.03	2081	0.02905	1	1	1	Any process that modulates the rate, frequency or extent of pancreatic juice secretion, the regulated release of pancreatic juice by the exocrine pancreas into the upper part of the intestine	0.17905	0.17905	NR1H2
GO:0090261	positive regulation of inclusion body as...	4	1	0.03	166	0.02905	0.0291	1	1	Any process that increases the rate, frequency, or extent of inclusion body assembly. Inclusion body assembly is the aggregation, arrangement and bonding together of a set of components to form an inclusion body	0.360067	0.360067	HSF1
GO:0090666	scaRNA localization to Cajal body	4	1	0.03	167	0.02905	0.0291	1	1		-0.0954146	-0.0954146	WRAP53	TCP1
GO:0098887	neurotransmitter receptor transport, end...	4	1	0.03	168	0.02905	0.0291	1	1		0.0784339	0.0784339	SCRIB	RAB11A
GO:1902075	cellular response to salt	4	1	0.03	169	0.02905	0.0291	1	1	Any process that results in a change in state or activity of a cell (in terms of movement, secretion, enzyme production, gene expression, etc.) as a result of a salt stimulus	0.122945	0.122945	HSF1
GO:1903935	response to sodium arsenite	4	1	0.03	170	0.02905	0.0291	1	1		0.122945	0.122945	HSF1
GO:1903936	cellular response to sodium arsenite	4	1	0.03	171	0.02905	0.0291	1	1		0.122945	0.122945	HSF1
GO:1904528	positive regulation of microtubule bindi...	4	1	0.03	172	0.02905	0.0291	1	1		0.181744	0.181744	HSF1	MAPRE1
GO:1903507	negative regulation of nucleic acid-temp...	696	10	5.11	173	0.02939	0.0294	1	1	Any process that stops, prevents or reduces the frequency, rate or extent of nucleic acid-templated transcription	0.99427	-1.66464	LRP8, KLF16, FZD8, SUFU, HES6, NOTCH1, TGFB1, SBNO2, ZNF219, CTNNBIP1, ZNF703, ZGLP1, BAHD1, TBX2, GFI1, GLIS2, HIC2, GAS6, SCX, SREBF1, MAGED1, FLNA, RPL10, SCMH1, THRA, PITX1, PTCH1, ZKSCAN3, USP3, FAM129B, CBX6, CCDC85B, MBD3, PLK3, GON4L, NR1H2, HDAC5, KLF12, PPM1F, DAB2IP, NELFB, AXIN1, ARHGAP35, ZHX2, MXD3, APBB1, SIRT6, UBC, KCNIP3, RECQL5, CCAR1, KMT2D, HINFP, CIC, HSF1, TNRC18, CEBPB, CB…	ZNF675, FAM220A, UBE2D3, THRB, STAT1, ZBTB33, HAT1, BAZ2A, ZBTB1, KDM5A, ZNF224, SUMO1, EED, RARB, BPTF, TRIM33, TBL1XR1, CGGBP1, CLOCK, RBPJ, UBA3, CREB1, TDP2, HIST1H2AC, ZMYND11, PTPRK, MTDH, WWP1, CBX3, WWTR1, EPC1, UBP1, NFIL3, ZNF217, DKK1, MTERF3, BASP1, WNT5A, ZNF93, IRF2, CHCHD3, GLIS3, SMURF2, SIM2, CNBP, SAP30, STRAP, BTAF1, TRIM24, CDKN1B, SIRT1, GMNN, CNOT2, NFE2L3, SUZ12, URI1, EIF4…
GO:0051239	regulation of multicellular organismal p...	1337	16	9.82	1619	0.02958	0.5375	1	1	Any process that modulates the frequency, rate or extent of a multicellular organismal process, the processes pertinent to the function of a multicellular organism above the cellular level; includes the integrated processes of tissues and organs	1.30377	-1.83254	SPP1, LAG3, ADAM8, CARD9, TMEM65, BST2, TIE1, LRP8, PSMA6, PREX1, CRTC1, SUFU, EXOSC6, NOTCH1, TGFB1, HMOX1, LAMA2, MAPK11, CERS2, TRPV2, KIF13B, TSPO, MYL5, SCN1B, AP3D1, SDK1, CSF1, GDPD5, ISG15, LZTS1, PGF, CTNNBIP1, CNPY2, MC1R, ABCA7, ZNF703, BIN1, DAPK3, CTSH, RAPGEF1, TBX2, GFI1, SYT11, WASF3, APOE, PLXNB1, ANAPC2, RNH1, GAS6, SCX, RAB11FIP3, SEMA7A, CDK9, SREBF1, ANKH, IGFBP5, ZBTB7B, HYA…	ITGB1, ZNF675, CD58, ARRDC3, PSMD5, UTRN, THRB, COL3A1, ERAP1, CADM1, STAT1, NFE2L2, NOV, PDCD10, LINC02210-CRHR1, TNFRSF11B, ZBTB1, TBC1D23, PDGFD, PIK3R1, GPRC5B, PHLDB2, GJA1, DVL3, MKL2, LRRC17, PFN2, SNX3, PIBF1, SUMO1, ADNP, EED, RARB, DNM1L, EIF2AK2, COL5A2, PSMD12, PDGFRA, GLMN, RYK, PSMA4, CLOCK, RTN4, RBPJ, GPAM, PSMC6, PPP2R3C, CREB1, PRKACB, STC2, MARCH7, CARD8, MTDH, HPSE, WWTR1, SOC…
GO:0006614	SRP-dependent cotranslational protein ta...	93	3	0.68	175	0.0307	0.0307	1	1	The targeting of proteins to a membrane that occurs during translation and is dependent upon two key components, the signal-recognition particle (SRP) and the SRP receptor. SRP is a cytosolic particle that transiently binds to the endoplasmic reticulum (ER) signal sequence in a nascent protein, to the large ribosomal unit, and to the SRP receptor in the ER membrane	0.560579	-0.991534	RPL10, RPSA, RPS19, RPS28, RPL31, SEC61A1, RPLP2, RPS10, RPS29, RPS21, RPS5, RPL37A, RPL13, RPL18	SRP19, SRP9, RPL39, RPL15, RPL36A, RPS3A, RPL9, SRP54, SRP14, SEC63, RPL17, SRP72, SSR3, RPS24, RPL30, RPL22, RPS4X, RPL26
GO:0043122	regulation of I-kappaB kinase/NF-kappaB ...	162	4	1.19	176	0.03088	0.0309	1	1	Any process that modulates I-kappaB kinase/NF-kappaB signaling	0.970325	-1.31224	CARD9, TNFRSF19, BST2, IKBKG, HMOX1, SPHK1, FLNA, S100A4, TICAM1, DAB2IP, UBC, AKAP13, MIB2, CCDC22, TRADD, MAPKBP1, IRF3, CARD19, PLEKHG5, TNFRSF1A, NLRP3, MUL1, PER1	TERF2IP, STAT1, UBE2N, NOV, GPRC5B, GJA1, ATP2C1, CARD8, ZMYND11, TRIM13, MTDH, G3BP2, GOLT1B, ANKRD17, MAP3K7, IL1B, C18orf32, TAB2, FKBP1A, SIRT1, SLC20A1, BIRC2, PSMD10, MIER1, TBK1, ECT2, TMEM9B, VAPA, TSPAN6, TRIM59, PRKD1, ZFAND6, TLR4, TRAF6, TNFAIP3, FBXW11, ASH1L, TRIM8, TFG, LPAR1
GO:0001568	blood vessel development	325	6	2.39	1453	0.03143	0.4332	1	1	The process whose specific outcome is the progression of a blood vessel over time, from its formation to the mature structure. The blood vessel is the vasculature carrying blood	1.00345	-1.5218	ADAM8, TIE1, FZD8, SUFU, NOTCH1, TGFB1, HMOX1, PGF, CTSH, RAPGEF1, TBX2, APOE, RNH1, CSPG4, DCTN5, SPHK1, PLCD1, FAM129B, HDAC5, VAV2, TGFBI, HSPG2, DAB2IP, EGFL7, ACTA2, RAMP1, SIRT6, CUL7, TNFSF12, LAMA5, COL18A1, NFATC4, AAMP, HHEX, CCM2, E2F8, LRP1, SNX17, JUNB, SPHK2, POFUT1, PRKD2, SMAD6, PPP3R1, LTBP1, CPLANE1, ADGRB2, FZD5, CD34, VEZF1, FMNL3, FOXO4, ANG, BAK1, PDGFRB, ENG, PNPLA6, ADAM15…	ITGB1, COL3A1, ERAP1, STAT1, NFE2L2, NOV, PDCD10, PDGFD, PDGFRA, GLMN, RBPJ, WARS2, MYLK, MTDH, PKD2, HPSE, UBP1, RASA1, CLIC4, ANKRD17, CYP1B1, GNA13, HAS2, EFNB2, IL1B, WNT5A, APOLD1, ZFP36L1, NUS1, SIRT1, C1GALT1, HOXA3, ANTXR1, DDAH1, KRIT1, QKI, TGFB2, ROCK1, TMED2, JAK1, FGF2, SERPINB7, CDC42, NKX3-1, MEIS1, ZMIZ1, SYNJ2BP, ISL1, STK4, PRRX1, PRKD1, ANXA3, SEMA5A, PTK2, COL8A1, TIPARP, PARV…
GO:1902679	negative regulation of RNA biosynthetic ...	704	10	5.17	177	0.03148	0.0315	1	1	Any process that stops, prevents or reduces the frequency, rate or extent of RNA biosynthetic process	0.99427	-1.66464	LRP8, KLF16, FZD8, SUFU, HES6, NOTCH1, TGFB1, SBNO2, ZNF219, CTNNBIP1, ZNF703, ZGLP1, BAHD1, TBX2, GFI1, GLIS2, HIC2, GAS6, SCX, SREBF1, MAGED1, FLNA, RPL10, SCMH1, THRA, PITX1, PTCH1, ZKSCAN3, USP3, FAM129B, CBX6, CCDC85B, MBD3, PLK3, GON4L, NR1H2, HDAC5, KLF12, PPM1F, DAB2IP, NELFB, AXIN1, ARHGAP35, ZHX2, MXD3, APBB1, SIRT6, UBC, KCNIP3, RECQL5, CCAR1, KMT2D, HINFP, CIC, HSF1, TNRC18, CEBPB, CB…	ZNF675, FAM220A, UBE2D3, THRB, STAT1, ZBTB33, HAT1, BAZ2A, ZBTB1, KDM5A, ZNF224, SUMO1, EED, RARB, BPTF, TRIM33, TBL1XR1, CGGBP1, CLOCK, RBPJ, UBA3, CREB1, TDP2, HIST1H2AC, ZMYND11, TRIM13, PTPRK, MTDH, WWP1, CBX3, WWTR1, EPC1, UBP1, NFIL3, ZNF217, DKK1, MTERF3, BASP1, WNT5A, ZNF93, IRF2, CHCHD3, GLIS3, SMURF2, SIM2, CNBP, SAP30, STRAP, BTAF1, TRIM24, CDKN1B, SIRT1, GMNN, CNOT2, NFE2L3, SUZ12, UR…
GO:0001558	regulation of cell growth	241	5	1.77	178	0.03155	0.0316	1	1	Any process that modulates the frequency, rate, extent or direction of cell growth	1.64023	-1.21966	CRYAB, HTRA1, IGFBP7, OSGIN1, SPP1, BST2, EGLN2, IGFBP2, TGFB1, TRPV2, APOE, ANAPC2, SEMA7A, IGFBP5, HYAL2, SPHK1, STK11, CCDC85B, MAPT, KIF14, BCAR1, APBB1, PTPRS, PLXNA1, CTDP1, CTTN, BAP1, BDKRB1, GNG4, PPARD, CLSTN1, UCN, SIPA1, H3F3A, IGFBP4, HSPA1B, SESN2, MUL1, EIF4G1, ADAM15, CDK11B, EXTL3, EXOSC4	PPT1, NOV, GJA1, ADNP, EBAG9, RTN4, BLZF1, CDKN2AIP, TAF9, KIAA1109, RAB11A, DPYSL2, WNT5A, CRIM1, CDKN1B, SIRT1, URI1, ZNF639, AGTR1, PSMD10, EI24, ADIPOR1, RB1, TGFB2, CSNK2A1, SYT1, SH3BP4, USP47, EGFR, EXOSC9, CDC42, CDC73, SDCBP, NET1, SGK3, SMARCA2, IFRD1, JADE1, EPB41L3, SEMA5A, BCL6, CHPT1, SUPV3L1, TMEM97, FGF13, RUFY3, TGFBR1, MACF1, ADAM10, RBBP7
GO:0009057	macromolecule catabolic process	912	12	6.7	179	0.03181	0.0318	1	1	The chemical reactions and pathways resulting in the breakdown of a macromolecule, any molecule of high relative molecular mass, the structure of which essentially comprises the multiple repetition of units derived, actually or conceptually, from molecules of low relative molecular mass	1.02148	-1.66289	ADAM8, PSMA6, EGLN2, SUFU, EXOSC6, POP1, TGFB1, USP43, DNASE1L2, ISG15, TRPC4AP, ZSWIM9, CTSH, ABTB1, APOE, ANAPC2, FBXL15, RNH1, CSPG4, TOLLIP, HYAL2, FLNA, PSMB10, RPL10, USP3, RPSA, FBXL19, PLK3, KIF14, CTSV, TMEM259, GPC1, PNPT1, HSPG2, PYGB, DAB2IP, RNF166, AXIN1, DNASE1, RPS19, CLN6, ATG4B, ZHX2, LDLR, GAA, GGA1, UBC, SDC3, TMEM129, CUL7, TNFSF12, DENND3, KCTD17, DVL1, AMER1, PTPN1, ZNRF1, …	UBE2D3, BNIP3L, PSMD5, RNASEH2B, PPT1, UCHL5, CUL5, EIF3E, UBE2N, NFE2L2, ZMPSTE24, TENT2, OPHN1, FMN2, UBE2D2, GJA1, HSP90AA1, PAIP1, GSPT1, FBXO8, SNX3, USP38, SUMO1, RFFL, SEC22B, GSPT2, PSMD12, RPL39, TBL1XR1, VPS36, GLMN, PNRC2, RPL15, PSMA4, RNF20, RNF111, VCAN, CLOCK, PSMC6, UBE3A, AZIN1, USP14, LYPLA1, CDC27, TOPORS, CNOT8, TATDN1, CDC23, TAF9, TRIM13, PDCD6IP, WWP1, VPS37A, HPSE, EDEM3, …
GO:0033365	protein localization to organelle	707	10	5.19	341	0.03229	0.0661	1	1	A process in which a protein is transported to, or maintained in, a location within an organelle	0.942949	-1.71194	IPO4, SUFU, TSPAN10, CROCC, TGFB1, TSPO, WRAP53, SZT2, AP3D1, AKR1C3, ABCA7, SYT11, GLIS2, PEX6, GAS6, RAB11FIP3, SCRIB, SREBF1, TOLLIP, HYAL2, SPHK1, SPPL3, FLNA, RPL10, THRA, STK11, PARD6A, RPSA, DNLZ, TIMM44, MAPT, LAMTOR4, DCLK2, TSPAN17, PEX16, DAB2IP, JUP, ZDHHC8, SUN2, ARFRP1, RPS19, STIMATE, DVL1, PACSIN2, BAP1, CCDC22, NAGPA, TUB, VTI1A, PMM1, HHEX, KLHL21, BANP, RPS28, RPL31, TOMM5, IFT…	CENPQ, UBE2D3, BNIP3L, NEDD1, MTBP, WDR35, KPNA3, TERF2IP, PEX3, POT1, NOV, PIK3R1, SRP19, HSP90AA1, PEX12, SRP9, YWHAZ, DNAJA1, PIBF1, SUMO1, DNM1L, UGCG, TIMM17A, HSPH1, TOMM20, CCDC14, RPL39, VPS36, RPL15, ZFYVE16, RTN4, RAB10, NPEPPS, WDR75, NUP35, RAB6A, KDELR3, TOPORS, TRNT1, TNPO1, PKD2, WWTR1, FBXW7, CNTLN, CEP68, G3BP2, CSNK2A2, NUP54, SSB, TCP1, KPNA4, RANBP6, BBIP1, RPL36A, RAB11A, IL1…
GO:0022618	ribonucleoprotein complex assembly	165	4	1.21	1101	0.03272	0.2952	1	1	The aggregation, arrangement and bonding together of proteins and RNA molecules to form a ribonucleoprotein complex	0.646144	-1.36678	RPL10, RPSA, DDX28, RPS19, SRPK3, DHX30, SNRPB, TARBP2, AAR2, RPS28, SNRNP200, NOP53, RPS10, CD2BP2, PRPF6, EDC3, PRPF31, NSUN4, HSP90AB1	SLU7, RPF1, PTGES3, PRPF39, HSP90AA1, EIF2A, NPM1, BRIX1, PSIP1, TAF9, RC3H1, G3BP2, MTERF3, PUM2, PTBP2, STRAP, EIF5, CRNKL1, CNOT2, RBMX, EIF4B, SRPK1, YTHDC1, SBDS, CNOT1, SNRPG, PAN3, CDC73, GEMIN2, CLNS1A, DENR, RBM22, SHQ1, MCTS1, LUC7L3, LUC7L2, MTERF4, CNOT6, LSM14A, ATM, ZNHIT6, PATL1, SNW1, SNRPE, FASTKD2, SF3B1, RPF2, PRPF18
GO:0051094	positive regulation of developmental pro...	612	9	4.49	624	0.03374	0.1341	1	1	Any process that activates or increases the rate or extent of development, the biological process whose specific outcome is the progression of an organism over time from an initial condition (e.g. a zygote, or a young adult) to a later condition (e.g. a multicellular animal or an aged adult)	1.04111	-1.41244	ADAM8, LRP8, PREX1, CRTC1, EXOSC6, NOTCH1, TGFB1, HMOX1, MAPK11, TRPV2, TSPO, SCN1B, AP3D1, CSF1, GDPD5, ISG15, PGF, CTNNBIP1, ZNF703, BIN1, CTSH, RAPGEF1, TBX2, WASF3, APOE, PLXNB1, ANAPC2, GAS6, SCX, SEMA7A, SPHK1, MAGED1, FLNA, TRPM4, HLX, THRA, STK11, ZNF16, PTCH1, BOC, MAPK12, FAM129B, S1PR2, KATNB1, MAPT, LRRC24, GPC1, DAB2IP, ACACB, ZNF335, ARHGAP35, APBB1, SIRT6, CUL7, PLXNB2, TNFSF12, DV…	EEF1E1, ERAP1, NFE2L2, ZBTB1, PDGFD, GPRC5B, PHLDB2, MKL2, SNX3, ADNP, RARB, DNM1L, RTN4, RBPJ, GPAM, PPP2R3C, CREB1, MTDH, HPSE, WWTR1, SOCS5, SPAG9, ATP11C, IQGAP1, STK3, GDF6, DKK1, SMAP1, CYP1B1, HAS2, EFNB2, BASP1, RAB11A, EPHA4, IL1B, ASPM, WNT5A, OXTR, SMURF2, SRGAP2C, ZFP36L1, SIRT1, MSH6, MFF, AGTR1, HDAC2, MSH2, TCF12, NCK1, DDAH1, RB1, EXOSC3, VAMP7, ATF1, TGFB2, VPS35, SYT1, SS18L1, J…
GO:1901214	regulation of neuron death	168	4	1.23	180	0.03462	0.0346	1	1	Any process that modulates the frequency, rate or extent of neuron death	0.87931	-1.04814	ADAM8, IKBKG, EGLN2, HMOX1, APOE, GCLM, MAPT, KIF14, TMEM259, TYRO3, HRAS, HSF1, CEBPB, HYOU1, NQO1, AMBRA1, BCL2L1, CBL, LRP1, CLN3, MAP3K11, UCN, WFS1, CD34, BAD, EIF4G1, NRBP2, DNAJC5, HSP90AB1, CORO1A, SOD2	PPT1, ADNP, CREB1, NAE1, PRNP, RASA1, FBXW7, MAP2K4, PICALM, SIRT1, ATF2, MSH2, EIF2S1, TGFB2, VPS35, ROCK1, TBK1, SET, CDC42, AXL, NONO, ISL1, HSPD1, TFAP2A, ATM, PRKCI, CASP2, EGLN1, CTSZ, SERPINF1, BHLHB9, IL6, GATA3, CHP1, GCLC, RRAS2, BTBD10, OXR1
GO:0006613	cotranslational protein targeting to mem...	98	3	0.72	181	0.03507	0.0351	1	1	The targeting of proteins to a membrane that occurs during translation. The transport of most secretory proteins, particularly those with more than 100 amino acids, into the endoplasmic reticulum lumen occurs in this manner, as does the import of some proteins into mitochondria	0.560579	-1.06328	RPL10, RPSA, RPS19, RPS28, RPL31, SEC61A1, RPLP2, RPS10, RPS29, RPS21, RPS5, RPL37A, RPL13, RPL18	SRP19, TRAM1, SRP9, RPL39, RPL15, RPL36A, ARL6IP1, RPS3A, RPL9, SRP54, SRP14, SEC63, RPL17, SSR1, SRP72, SSR3, RPS24, RPL30, RPL22, SEC62, RPS4X, RPL26
GO:0043112	receptor metabolic process	98	3	0.72	1494	0.03507	0.461	1	1	The chemical reactions and pathways involving a receptor molecule, a macromolecule that undergoes combination with a hormone, neurotransmitter, drug or intracellular messenger to initiate a change in cell function	0.762347	-1.01378	ARAP1, TGFB1, CNPY2, APOE, SCRIB, EHD3, RAMP1, ECE1, GRK2, PTPN1, LMTK2, PHETA1, LRP1, PLEKHJ1, ITGB3	ITGB1, SCYL2, DKK1, PICALM, BECN1, LMBRD1, HDAC2, ZNRF3, GRK3, VAMP3, SDCBP, FUT8, GTF2H2, FNTA, AC068234.1, ALS2, SNX25, SH3GLB1, RAB5A, ANKRD13C, FMR1, ATAD1
GO:0009991	response to extracellular stimulus	249	5	1.83	1789	0.03559	0.6648	1	1	Any process that results in a change in state or activity of a cell or an organism (in terms of movement, secretion, enzyme production, gene expression, etc.) as a result of an extracellular stimulus	0.983868	-1.32663	SPP1, SLC27A4, IGFBP2, TGFB1, HMOX1, TSPO, SZT2, AKR1C3, APOE, GAS6, SREBF1, GCLM, MBD3, CTSV, MTHFR, ACACB, ARHGAP35, SLC25A25, RPS19, SIRT6, DEPDC5, PSPH, HSF1, GSDMD, WDR24, NUAK2, NQO1, POR, AMBRA1, CBL, PPARD, UCN, SKP2, SIPA1, AACS, CAD, FOXO4, SETDB1, ZFYVE1, KAT2A, SREBF2, KPTN, GAS2L1, CST3, MYBBP1A	BCHE, NFE2L2, HAT1, TNFRSF11B, EIF2A, ADNP, DNM1L, EIF2AK2, TBL1XR1, STC2, CDKN2B, AGL, OMA1, SPX, BECN1, SLC38A2, TRIM24, DAD1, ITGA6, SIRT1, ACSL4, SRD5A1, LRP11, SEH1L, EIF2S1, RRAGB, SLC16A1, MBD2, TYMS, EGFR, DSC2, USP33, LYN, AXL, ATG5, TBL2, LAMP2, BRIP1, HSPA8, RALB, CPS1, PRKD1, SNW1, NUDT15, MAPK8, TRPV1, SH3GLB1, ACSL3, TPCN2, PRKAA1, GNPAT, GLRX2, ITFG2, IL6, KLF10, GCLC, RPS6KB1
GO:0008361	regulation of cell size	99	3	0.73	182	0.03598	0.036	1	1	Any process that modulates the size of a cell	0.850559	-0.841862	SPP1, TRPV2, APOE, ANAPC2, SEMA7A, RAP1GAP2, MAPT, LAMTOR4, VAV2, PTPRS, PLXNA1, CTTN, CLN8, UCN, HSP90AB1, WDTC1	ADNP, RTN4, CREB1, RAB11A, DPYSL2, WNT5A, CLNS1A, IQGAP3, TMEM123, IFRD1, SEMA5A, FGF13, RUFY3, KCNMA1, MACF1
GO:0050789	regulation of biological process	5679	49	41.7	1605	0.03599	0.5311	1	1	Any process that modulates the frequency, rate or extent of a biological process. Biological processes are regulated by many means; examples include the control of gene expression, protein modification or interaction with a protein or substrate molecule	1.94143	-2.16464	CRYAB, SPNS2, HTRA1, IGFBP7, OSGIN1, SPP1, TMX1, ZNF512B, TSPAN9, WDR81, APLP1, ADAM11, LAG3, TMEM8B, NOXA1, ADAM8, CARD9, TMEM65, TNFRSF19, BST2, AKAP10, ZNF628, LMTK3, AL928654.3, TIE1, LRP8, CCNK, PSMA6, ZBTB34, ADAMTS1, ZNF341, PIDD1, PRKAR1B, IKBKG, WFIKKN1, RHOF, KLF16, PREX1, BRF1, EGLN2, FZD8, PPFIA3, CRTC1, ARAP1, ITGB4, VILL, ZBTB8A, STMN3, RTEL1, NEURL1B, SUFU, RGS12, NPHP4, KLF6, ZNF2…	ITGB1, ZNF675, FAM220A, ZNF138, CENPQ, KLF3, CCNG1, GEM, CD58, ARRDC3, UBE2D3, ZNF181, SH3BGRL, BNIP3L, HIGD1A, WIPF1, ARPC5, SNRK, PSMD5, ZNF441, DCUN1D4, CAMK2N1, EEF1E1, ITGB3BP, CETN2, PLPP5, BCHE, ZNF83, RNASEH2B, MTBP, PPT1, DYRK1A, PTGES3, DRAM2, RHOQ, UCHL5, CUL5, WDR35, EIF3E, KPNA3, UTRN, TERF2IP, TOPBP1, ZFP69B, THRB, IREB2, COL3A1, BICC1, ERAP1, CADM1, STAT1, UBE2N, NFE2L2, XPR1, ANKR…
GO:0002246	wound healing involved in inflammatory r...	5	1	0.04	183	0.03618	0.0362	1	1	The series of events that restore integrity to damaged tissue that contribute to an inflammatory response	0.388882	0.388882	TGFB1, HMOX1
GO:0006569	tryptophan catabolic process	5	1	0.04	184	0.03618	0.0362	1	1	The chemical reactions and pathways resulting in the breakdown of tryptophan, the chiral amino acid 2-amino-3-(1H-indol-3-yl)propanoic acid	0.162439	0.162439	SLC3A2
GO:0007000	nucleolus organization	5	1	0.04	185	0.03618	0.0362	1	1	A process that is carried out at the cellular level which results in the assembly, arrangement of constituent parts, or disassembly of the nucleolus	0.101651	0.101651	RPS19
GO:0009052	pentose-phosphate shunt, non-oxidative b...	5	1	0.04	186	0.03618	0.0362	1	1	The branch of the pentose-phosphate shunt which does not involve oxidation reactions. It comprises a series of sugar phosphate interconversions, starting with ribulose 5-P and producing fructose 6-P and glyceraldehyde 3-P	0.0730164	0.0730164	TKT	RPE
GO:0010885	regulation of cholesterol storage	5	1	0.04	187	0.03618	0.0362	1	1	Any process that modulates the rate or extent of cholesterol storage. Cholesterol storage is the accumulation and maintenance in cells or tissues of cholesterol, cholest-5-en-3 beta-ol, the principal sterol of vertebrates and the precursor of many steroids, including bile acids and steroid hormones	0.449344	0.449344	NR1H2, SREBF2, SCARB1
GO:0032274	gonadotropin secretion	5	1	0.04	188	0.03618	0.0362	1	1	The regulated release of a gonadotropin, any hormone that stimulates the gonads, especially follicle-stimulating hormone and luteinizing hormone	0.1457	0.1457	FAM129B, KISS1	TMF1
GO:0033623	regulation of integrin activation	5	1	0.04	189	0.03618	0.0362	1	1	Any process that modulates the frequency, rate, or extent of integrin activation	0.352979	0.352979	PIEZO1, KIF14
GO:0034312	diol biosynthetic process	5	1	0.04	190	0.03618	0.0362	1	1	The chemical reactions and pathways resulting in the formation of a diol, any alcohol containing two hydroxyl groups attached to saturated carbon atoms	0.209975	0.209975	SPHK1, SPHK2
GO:0034380	high-density lipoprotein particle assemb...	5	1	0.04	2082	0.03618	1	1	1	The aggregation and arrangement of proteins and lipids to form a high-density lipoprotein particle	0.521356	0.521356	ABCA7, APOE, NR1H2
GO:0042436	indole-containing compound catabolic pro...	5	1	0.04	191	0.03618	0.0362	1	1	The chemical reactions and pathways resulting in the breakdown of compounds that contain an indole (2,3-benzopyrrole) skeleton	0.162439	0.162439	SLC3A2
GO:0045080	positive regulation of chemokine biosynt...	5	1	0.04	192	0.03618	0.0362	1	1	Any process that activates or increases the frequency, rate or extent of the chemical reactions and pathways resulting in the formation of chemokines	0.0564256	0.0564256	HMOX1, TICAM1	IL1B, WNT5A
GO:0045723	positive regulation of fatty acid biosyn...	5	1	0.04	193	0.03618	0.0362	1	1	Any process that activates or increases the frequency, rate or extent of the chemical reactions and pathways resulting in the formation of fatty acids	0.284081	0.284081	NR1H2
GO:0046218	indolalkylamine catabolic process	5	1	0.04	194	0.03618	0.0362	1	1	The chemical reactions and pathways resulting in the breakdown of indolalkylamines, indole or indole derivatives containing a primary, secondary, or tertiary amine group	0.162439	0.162439	SLC3A2
GO:0046512	sphingosine biosynthetic process	5	1	0.04	195	0.03618	0.0362	1	1	The chemical reactions and pathways resulting in the formation of sphingosine (sphing-4-enine), trans-D-erytho-2-amino-octadec-4-ene-1,3-diol, a long chain amino diol sphingoid base that occurs in most sphingolipids in animal tissues	0.209975	0.209975	SPHK1, SPHK2
GO:0046520	sphingoid biosynthetic process	5	1	0.04	196	0.03618	0.0362	1	1	The chemical reactions and pathways resulting in the formation of sphingoids, any of a class of compounds comprising sphinganine and its homologues and stereoisomers, and derivatives of these compounds	0.209975	0.209975	SPHK1, SPHK2
GO:0051029	rRNA transport	5	1	0.04	197	0.03618	0.0362	1	1	The directed movement of rRNA, ribosomal ribonucleic acid, into, out of or within a cell, or between cells, by means of some agent such as a transporter or pore	0.366127	0.366127	RPSA, TST, PNPT1
GO:0051601	exocyst localization	5	1	0.04	198	0.03618	0.0362	1	1	Any process in which an exocyst is transported to, or maintained in, a specific location. An exocyst is a protein complex peripherally associated with the plasma membrane that determines where vesicles dock and fuse	-0.325689	-0.325689	EXOC3	EXOC8, EXOC1, RALB
GO:0060368	regulation of Fc receptor mediated stimu...	5	1	0.04	199	0.03618	0.0362	1	1	Any process that modulates the rate, frequency or extent of the Fc receptor mediated stimulatory signaling pathway. The Fc receptor mediated stimulatory signaling pathway is a series of molecular signals generated as a consequence of a the binding of the Fc portion of an immunoglobulin by an Fc receptor capable of activating or perpetuating an immune response. The Fc portion of an immunoglobulin …	0.0282227	0.0282227	RAPGEF1, CSK	LYN, PLSCR1
GO:0072719	cellular response to cisplatin	5	1	0.04	200	0.03618	0.0362	1	1	Any process that results in a change in state or activity of a cell (in terms of movement, secretion, enzyme production, gene expression, etc.) as a result of a cisplatin stimulus	0.0951509	0.0951509	HMOX1
GO:0090594	inflammatory response to wounding	5	1	0.04	201	0.03618	0.0362	1	1	The immediate defensive reaction by vertebrate tissue to injury caused by chemical or physical agents	0.388882	0.388882	TGFB1, HMOX1
GO:0099638	endosome to plasma membrane protein tran...	5	1	0.04	202	0.03618	0.0362	1	1		-0.0755376	-0.0755376	SCRIB	RAB11A, VPS35
GO:0099639	neurotransmitter receptor transport, end...	5	1	0.04	203	0.03618	0.0362	1	1		-0.0755376	-0.0755376	SCRIB	RAB11A, VPS35
GO:1902510	regulation of apoptotic DNA fragmentatio...	5	1	0.04	204	0.03618	0.0362	1	1	Any process that modulates the frequency, rate or extent of apoptotic DNA fragmentation	0.170576	0.170576	HSF1
GO:1902946	protein localization to early endosome	5	1	0.04	2083	0.03618	1	1	1	A process in which a protein is transported to, or maintained in, a location within an early endosome	0.175914	0.175914	SCRIB
GO:1903624	regulation of DNA catabolic process	5	1	0.04	205	0.03618	0.0362	1	1		0.170576	0.170576	HSF1
GO:0044087	regulation of cellular component biogene...	523	8	3.84	407	0.03662	0.0815	1	1	Any process that modulates the frequency, rate or extent of cellular component biogenesis, a process that results in the biosynthesis of constituent macromolecules, assembly, and arrangement of constituent parts of a cellular component	1.25391	-1.41895	CRYAB, PREX1, ARAP1, VILL, RTEL1, NPHP4, NOTCH1, HTT, NPHP1, CROCC, TGFB1, ADAMTS16, CTNNBIP1, DAPK3, PIEZO1, RAPGEF1, SYT11, CLIP3, TRPM2, SPIRE2, THRA, ALMS1, MAPT, LRRC24, GTF2H3, SEPT9, KIF14, FSCN1, NR1H2, FHOD3, PPM1F, DAB2IP, NCLN, ARHGAP35, TBC1D14, MAP4, SIRT6, TBCD, WASHC1, AKAP13, KCTD17, WASL, HRAS, CTTN, HSF1, NECTIN1, MIEF2, FUZ, CAPG, SPTY2D1, COL16A1, PPP2R5B, CLSTN1, EVI5L, MVB12…	ARPC5, RHOQ, PIK3R1, CAPZA1, PHLDB2, GJA1, CHMP2B, HSP90AA1, GTF2F2, PFN2, SUMO1, ADNP, DNM1L, EIF2AK2, NPM1, PSMC6, WDR75, CREB1, PDCD6IP, GTF2H1, IQGAP1, RASA1, DKK1, SUB1, SAMD8, BECN1, NCKAP1, WNT5A, OXTR, SCFD1, SRGAP2C, CDC42EP3, DOCK11, CDKN1B, CNOT2, MET, UTP15, CAPZA2, CEP120, BIRC2, NCK1, ANTXR1, RAB7A, SEPT7, RGS2, MDM1, CNOT1, PIKFYVE, RB1, PKP2, TBC1D12, MYO10, ATF7IP, VPS4B, VPS35, …
GO:0051347	positive regulation of transferase activ...	429	7	3.15	206	0.03698	0.037	1	1	Any process that activates or increases the frequency, rate or extent of transferase activity, the catalysis of the transfer of a group, e.g. a methyl group, glycosyl group, acyl group, phosphorus-containing, or other groups, from a donor compound to an acceptor	1.11006	-1.5595	ADAM8, LRP8, CCNK, PSMA6, PRKAR1B, IKBKG, FZD8, FGFR3, TGFB1, MAPK11, WRAP53, CSF1, CDK20, RAPGEF1, ANAPC2, GAS6, CSPG4, MADD, MAGED1, PSMB10, STK11, ZNF16, S1PR2, MAPT, KIF14, C1QTNF2, MAP2K3, VAV2, DAB2IP, AXIN1, CAMKK1, UBC, TELO2, CARD10, AKAP13, PTPN1, HRAS, MAPK8IP3, RASSF2, PILRB, CSK, AMBRA1, DGKQ, SERINC2, DBNL, ANAPC11, PNKP, PDE6G, MAP3K11, UCN, CDC6, FZD5, ANAPC7, CCND3, BAD, TIAM1, M…	ARRDC3, PSMD5, DCUN1D4, PTGES3, UBE2N, POT1, PDCD10, PDGFD, GPRC5B, DVL3, HSP90AA1, PIBF1, MNAT1, ADNP, MAP3K20, HSPH1, EIF2AK2, PSMD12, DCUN1D5, PDGFRA, PSMA4, PSMC6, PPP2R3C, MAP3K1, PRKACB, CDC27, TOPORS, CDC23, PKD2, MAP4K5, PRKAR1A, SPAG9, STRADB, IQGAP1, NRK, STK3, MAP4K3, FBXW7, PSMA1, CCNH, MAP3K7, TCP1, MAP2K4, RFC4, EPHA4, IL1B, WNT5A, TAOK3, CCNC, ANAPC10, TAB2, COPS8, CALM2, CDKN1B, S…
GO:0065007	biological regulation	5985	51	43.94	1711	0.03719	0.6043	1	1	Any process that modulates a measurable attribute of any biological process, quality or function	1.94143	-2.16464	CRYAB, SPNS2, HTRA1, IGFBP7, OSGIN1, SPP1, TMX1, ZNF512B, TSPAN9, WDR81, APLP1, ADAM11, LAG3, TMEM8B, NOXA1, ADAM8, CARD9, TMEM65, TNFRSF19, BST2, AKAP10, ZNF628, LMTK3, AL928654.3, TIE1, LRP8, CCNK, PSMA6, ZBTB34, ADAMTS1, ZNF341, PIDD1, PRKAR1B, IKBKG, WFIKKN1, RHOF, KLF16, PREX1, BRF1, EGLN2, FZD8, PPFIA3, CRTC1, SLC9B1, ANKRD11, ARAP1, ITGB4, VILL, ZBTB8A, STMN3, RTEL1, NEURL1B, SUFU, RGS12, …	ITGB1, ZNF675, FAM220A, ZNF138, CENPQ, KLF3, CCNG1, GEM, CD58, ARRDC3, UBE2D3, ZNF181, SH3BGRL, BNIP3L, HIGD1A, WIPF1, ARPC5, SNRK, PSMD5, ZNF441, DCUN1D4, CAMK2N1, EEF1E1, ITGB3BP, CETN2, PLPP5, BCHE, ZNF83, RNASEH2B, MTBP, AGFG1, PPT1, DYRK1A, PTGES3, DRAM2, RHOQ, UCHL5, SLC39A6, CUL5, WDR35, EIF3E, KPNA3, UTRN, TERF2IP, TOPBP1, ZFP69B, THRB, IREB2, COL3A1, BICC1, ERAP1, CADM1, STAT1, UBE2N, NF…
GO:0044723	single-organism carbohydrate metabolic p...	253	5	1.86	1452	0.03772	0.4325	1	1	The chemical reactions and pathways involving carbohydrates, occurring within a single organism	0.877594	-1.03666	B3GNT3, IPPK, H6PD, TGFB1, PC, STK40, WDR5, IGFBP5, MAN2C1, TKFC, INPP5E, CPT1A, BRAT1, PFKL, C1QTNF2, PYGB, ACACB, TKT, SLC25A10, SIRT6, GAA, UBC, GLYCTK, GALK1, PMM1, IDUA, DGKQ, PFKFB4, ST6GALNAC6, PPARD, OGDH, POFUT1, NEU3, STBD1, PCK2, ST3GAL5, PTH1R, NISCH, PHKA2, GAL3ST4, ISYNA1, IGFBP4, CRTC2, SESN2, BAD, FUT10, KAT2A, HRH1, CHST12, MANBA, WDTC1, ALDOA, SLC25A1, INPPL1	GPD2, UGP2, ARPP19, PPP1CC, KAT2B, AGL, HAS2, OMA1, CALM2, SIRT1, PPP1CB, FUCA2, ST6GALNAC5, GYG1, ADIPOR1, SDHAF3, COX11, SLC25A13, ABHD10, ALDH5A1, PPP1R2, CTBS, GNPDA2, IMPAD1, BPGM, PDHB, FUT8, SERP1, RPE, B3GLCT, GK, PGM2, COQ2, DUSP12, MAN2A1, IMPA1, PRKAA1, IL6, GCLC, HEXB
GO:0043618	regulation of transcription from RNA pol...	101	3	0.74	731	0.03784	0.1629	1	1	Any process that modulates the frequency, rate or extent of transcription from an RNA polymerase II promoter as a result of a stimulus indicating the organism is under stress. The stress is usually, but not necessarily, exogenous (e.g. temperature, humidity, ionizing radiation)	0.782202	-1.4097	PSMA6, EGLN2, NOTCH1, HMOX1, PSMB10, UBC, HSF1, CEBPB, MUC1, SESN2	UBE2D3, HIGD1A, PSMD5, NFE2L2, UBE2D2, PSMD12, PSMA4, RBPJ, PSMC6, MBTPS2, PSMA1, SIN3A, PSMD10, NCK1, BACH1, CITED2, CUL2, PSMD14, PSMD6, PSMD7, PSMA3, EP300, EGLN1, TAF1, ELOC
GO:0071826	ribonucleoprotein complex subunit organi...	174	4	1.28	1175	0.03863	0.3189	1	1	Any process in which macromolecules aggregate, disaggregate, or are modified, resulting in the formation, disassembly, or alteration of a ribonucleoprotein complex	0.652874	-1.37933	RPL10, RPSA, DDX28, RPS19, SRPK3, DHX30, SNRPB, KLC1, TARBP2, AAR2, RPS28, SNRNP200, NOP53, RPS10, CD2BP2, PRPF6, EDC3, PRPF31, NSUN4, HSP90AB1	SLU7, RPF1, PTGES3, PRPF39, HSP90AA1, EIF2A, NPM1, MTIF3, BRIX1, PSIP1, TAF9, RC3H1, G3BP2, MTERF3, PUM2, PTBP2, STRAP, EIF5, CRNKL1, CNOT2, RBMX, EIF4B, SRPK1, YTHDC1, SBDS, CNOT1, SNRPG, PAN3, CDC73, GEMIN2, CLNS1A, DENR, RBM22, SHQ1, MCTS1, LUC7L3, LUC7L2, MTERF4, CNOT6, LSM14A, ATM, ZNHIT6, PATL1, SNW1, SNRPE, KIF5B, GFM2, MTIF2, FASTKD2, SF3B1, RPF2, PRPF18
GO:0045047	protein targeting to ER	102	3	0.75	207	0.03879	0.0388	1	1	The process of directing proteins towards the endoplasmic reticulum (ER) using signals contained within the protein. One common mechanism uses a 16- to 30-residue signal sequence, typically located at the N-terminus of the protein and containing positively charged amino acids followed by a continuous stretch of hydrophobic residues, which directs the ribosome to the ER membrane and initiates tran…	0.573938	-0.991534	RPL10, RPSA, RPS19, PMM1, RPS28, RPL31, SEC61A1, RPLP2, RPS10, RPS29, RPS21, RPS5, RPL37A, RPL13, RPL18	SRP19, SRP9, RPL39, RPL15, RPL36A, RPS3A, RPL9, SRP54, SRP14, SEC63, RPL17, SRP72, SPCS2, SSR3, RPS24, RPL30, RPL22, SEC62, RPS4X, RPL26
GO:0001944	vasculature development	342	6	2.51	1519	0.03887	0.4733	1	1	The process whose specific outcome is the progression of the vasculature over time, from its formation to the mature structure. The vasculature is an interconnected tubular multi-tissue structure that contains fluid that is actively transported around the organism	1.00345	-1.5218	ADAM8, TIE1, FZD8, SUFU, NOTCH1, TGFB1, HMOX1, PGF, CTSH, RAPGEF1, TBX2, APOE, RNH1, CSPG4, DCTN5, SPHK1, PLCD1, STK11, FAM129B, HDAC5, VAV2, TGFBI, HSPG2, DAB2IP, EGFL7, ACTA2, RAMP1, SIRT6, CUL7, TNFSF12, LAMA5, COL18A1, NFATC4, AAMP, HHEX, CCM2, E2F8, B9D1, LRP1, SNX17, JUNB, SPHK2, POFUT1, PRKD2, SMAD6, PPP3R1, LTBP1, LIF, CPLANE1, ADGRB2, FZD5, CD34, VEZF1, FMNL3, FOXO4, ANG, BAK1, PDGFRB, E…	ITGB1, COL3A1, ERAP1, STAT1, NFE2L2, NOV, PDCD10, PDGFD, PDGFRA, GLMN, RBPJ, WARS2, MYLK, MTDH, PKD2, HPSE, EPC1, UBP1, RASA1, FBXW7, CLIC4, ANKRD17, CYP1B1, GNA13, HAS2, EFNB2, IL1B, WNT5A, APOLD1, ZFP36L1, NUS1, SIRT1, C1GALT1, HOXA3, ANTXR1, DDAH1, KRIT1, QKI, TGFB2, ROCK1, TMED2, JAK1, FGF2, SERPINB7, CDC42, NKX3-1, MEIS1, ZMIZ1, SYNJ2BP, ISL1, STK4, PRRX1, PRKD1, ANXA3, SEMA5A, PTK2, COL8A1,…
GO:0002753	cytoplasmic pattern recognition receptor...	43	2	0.32	208	0.03952	0.0395	1	1	Any series of molecular signals generated as a consequence of a cytoplasmic pattern recognition receptor (PRR) binding to one of its physiological ligands. PRRs bind pathogen-associated molecular pattern (PAMPs), structures conserved among microbial species, or damage-associated molecular pattern (DAMPs), endogenous molecules released from damaged cells	0.575518	-0.837353	IKBKG, TKFC, UBC, XIAP, IRF3, HSPA1B, IRF7	UBE2N, ANKRD17, MAP3K7, PUM2, PUM1, TAB2, BIRC2, TSPAN6, LSM14A, TLR4, TRAF6, TNFAIP3, IFIH1
GO:0061180	mammary gland epithelium development	43	2	0.32	209	0.03952	0.0395	1	1	The process whose specific outcome is the progression of the mammary gland epithelium over time, from its formation to the mature structure. The mammary gland is a large compound sebaceous gland that in female mammals is modified to secrete milk	0.662203	-0.523866	TGFB1, CSF1, ZNF703, SCRIB, PTCH1, CEBPB, DEAF1, ETV4	RTN4, AREG, WNT5A, IQGAP3, GATA3
GO:0071230	cellular response to amino acid stimulus	43	2	0.32	1020	0.03952	0.2632	1	1	Any process that results in a change in state or activity of a cell (in terms of movement, secretion, enzyme production, gene expression, etc.) as a result of an amino acid stimulus. An amino acid is a carboxylic acids containing one or more amino groups	0.620465	-0.804046	SZT2, GCLM, LAMTOR4, COL6A1, HSF1, CEBPB, BCL2L1, COL16A1, SESN2, DNMT1, KPTN	COL3A1, PDGFD, COL5A2, RRAGB, SH3BP4, EGFR, HNRNPD, SLC38A9, COL4A1, ITFG2, PDGFC, GCLC
GO:0043620	regulation of DNA-templated transcriptio...	103	3	0.76	737	0.03975	0.168	1	1	Modulation of the frequency, rate or extent of transcription from a DNA template as a result of a stimulus indicating the organism is under stress. The stress is usually, but not necessarily, exogenous (e.g. temperature, humidity, ionizing radiation)	0.782202	-1.4097	PSMA6, EGLN2, NOTCH1, HMOX1, PSMB10, UBC, HSF1, CEBPB, MUC1, SESN2	UBE2D3, HIGD1A, PSMD5, NFE2L2, UBE2D2, PSMD12, PSMA4, RBPJ, PSMC6, MBTPS2, PSMA1, SIN3A, PSMD10, NCK1, BACH1, CITED2, CUL2, PSMD14, PSMD6, PSMD7, PSMA3, EP300, EGLN1, BCLAF1, TAF1, ELOC
GO:0044712	single-organism catabolic process	533	8	3.91	438	0.04028	0.0881	1	1	A catabolic process - chemical reactions and pathways resulting in the breakdown of substances - which involves a single organism	1.07187	-1.57074	SPP1, FTCD, PNPLA7, SLC27A4, HTT, HMOX1, TSPO, COL6A2, NEIL1, PDE4A, ALDH4A1, AKR1C3, APOE, CSPG4, SREBF1, ATG2A, MAN2C1, SPHK1, MRC2, THRA, PLCD1, TKFC, INPP5E, CPT1A, TST, NTHL1, PFKL, TMEM259, NUDT18, GPC1, ABCD1, PYGB, ACACB, COL6A1, ZDHHC8, PHYKPL, ATG4B, LDLR, SIRT6, GAA, TMEM129, ACSF3, AMDHD2, GLYCTK, COL7A1, GALK1, COL18A1, GCAT, CTTN, ALDH2, MPST, SLC3A2, POMT2, VPS13C, POR, BCAT2, IDUA…	ITGB1, BNIP3L, PPT1, COL3A1, NFE2L2, HSD17B11, COL4A5, GPD2, NAPEPLD, DNM1L, ABCD3, COL5A2, TBL1XR1, VCAN, ACADSB, PSMC6, ADO, WDR75, USP14, TRIM13, LIPA, HPSE, EDEM3, AGL, FBXW7, CSNK2A2, CYP1B1, PCYOX1, COL11A1, USP25, HPRT1, IL1B, RHBDD1, MCCC2, BECN1, UBE2J1, STT3B, LUM, YWHAH, FUNDC1, CALM2, HNMT, PPP1CB, FUCA2, GYG1, AUH, COL12A1, DDAH1, MAP1LC3B, RAB7A, PEX2, JKAMP, ACADM, NT5E, ABHD10, AL…
GO:0048518	positive regulation of biological proces...	2968	29	21.79	1978	0.04049	0.9002	1	1	Any process that activates or increases the frequency, rate or extent of a biological process. Biological processes are regulated by many means; examples include the control of gene expression, protein modification or interaction with a protein or substrate molecule	1.4712	-2.00348	HTRA1, OSGIN1, SPP1, LAG3, ADAM8, CARD9, TNFRSF19, BST2, LRP8, CCNK, PSMA6, PIDD1, PRKAR1B, IKBKG, PREX1, BRF1, EGLN2, FZD8, CRTC1, ARAP1, RTEL1, NPHP4, KLF6, EXOSC6, NOTCH1, HTT, TEF, IGFBP2, NPHP1, CROCC, FGFR3, TGFB1, MEF2D, HMOX1, NRF1, LAMA2, MAPK11, EFNB1, TRPV2, TSPO, SCN1B, WRAP53, AP3D1, CSF1, GDPD5, ISG15, PGF, CTNNBIP1, CDK20, CNPY2, SLC35F6, MC1R, AKR1C3, ABCA7, ZNF703, BIN1, DAPK3, Z…	ITGB1, CENPQ, CD58, ARRDC3, UBE2D3, SH3BGRL, BNIP3L, WIPF1, ARPC5, PSMD5, DCUN1D4, EEF1E1, ITGB3BP, RNASEH2B, MTBP, PPT1, DYRK1A, PTGES3, RHOQ, WDR35, EIF3E, UTRN, TERF2IP, THRB, COL3A1, ERAP1, CADM1, STAT1, UBE2N, NFE2L2, ANKRD49, POT1, PHIP, YEATS4, IFT74, MED21, NOV, PDCD10, LINC02210-CRHR1, ZBTB1, TBC1D23, PDGFD, PIK3R1, TIAM2, GPRC5B, UBE2D2, NUSAP1, PHLDB2, GJA1, DVL3, MKL2, CHMP2B, HSP90AA…
GO:2001236	regulation of extrinsic apoptotic signal...	104	3	0.76	211	0.04072	0.0407	1	1	Any process that modulates the frequency, rate or extent of extrinsic apoptotic signaling pathway	0.800803	-0.929015	PIDD1, HTT, HMOX1, DAPK3, MADD, HYAL2, GCLM, TNFSF12, CTTN, TRADD, BCL2L1, SH3RF1, PELI3, BID, HSPA1B	PHIP, RFFL, ZMYND11, STRADB, STK3, IL1B, ITGA6, TGFB2, EYA4, STK4, TNFAIP3, TGFBR1, SIAH2, GCLC, RPS6KB1
GO:0032147	activation of protein kinase activity	177	4	1.3	212	0.04072	0.0407	1	1	Any process that initiates the activity of an inactive protein kinase	0.922437	-1.21197	ADAM8, PRKAR1B, IKBKG, MAPK11, RAPGEF1, GAS6, CSPG4, MADD, STK11, S1PR2, KIF14, C1QTNF2, MAP2K3, DAB2IP, AXIN1, UBC, CARD10, AKAP13, PTPN1, MAPK8IP3, PILRB, DGKQ, DBNL, PDE6G, MAP3K11, UCN, MUL1, ANG, AVPI1, MAP3K10, MAP3K6, MAPKAPK2, ITGB3	UBE2N, GPRC5B, PIBF1, ADNP, MAP3K20, EIF2AK2, PPP2R3C, MAP3K1, PRKACB, MAP4K5, PRKAR1A, SPAG9, STRADB, NRK, MAP4K3, MAP3K7, MAP2K4, IL1B, WNT5A, TAB2, COPS8, HACD3, TGFB2, FGF2, EGFR, NKX3-1, MAP3K13, ECT2, IQGAP3, TLR4, TRAF6, MAP4K2, FGF13, AC068234.1, TGFBR1, EMP2, ERCC6, GADD45A, ADCY7, PRKAA1, PDGFC, RGCC, LPAR1
GO:0043408	regulation of MAPK cascade	346	6	2.54	213	0.04078	0.0408	1	1	Any process that modulates the frequency, rate or extent of signal transduction mediated by the MAP kinase (MAPK) cascade	1.06694	-1.42112	ADAM8, CARD9, TNFRSF19, IKBKG, FZD8, FGFR3, TGFB1, MAPK11, ABCA7, RGS3, RAPGEF1, APOE, GAS6, CSPG4, MADD, SEMA7A, STK40, HYAL2, MAGED1, DUSP8, S1PR2, C1QTNF2, MAP2K3, DAB2IP, AXIN1, SEMA4C, UBC, AKAP13, PTPN1, HRAS, MAPK8IP3, RASSF2, CSK, DBNL, SH3RF1, PDE6G, KISS1, MAP3K11, FOXM1, PRKD2, LIF, FZD5, PSAP, CDK10, IGFBP4, TIAM1, MUL1, PDGFRB, SMPD1, AVPI1, MAP3K10, MAP3K6, MAPKAPK2, PER1	ZNF675, UBE2N, PDCD10, PDGFD, DVL3, ARL6IP5, DNAJA1, MAP3K20, HSPH1, EIF2AK2, PDGFRA, RYK, MAP3K1, ZMYND11, MAP4K5, RNF149, SPAG9, IQGAP1, NRK, STK3, GDF6, MAP4K3, FBXW7, MAP3K7, MAP2K4, EPHA4, IL1B, WNT5A, TAOK3, GDF11, TAB2, ATP6AP2, PSMD10, HACD3, RGS2, TGFB2, MBIP, RAP1B, GBP1, FGF2, VRK2, EGFR, CDC42, MAP3K13, CD24, SDCBP, CD44, LYN, SPRED2, SYNJ2BP, SPRY2, IQGAP3, AIDA, TLR4, DUSP3, TRAF6, …
GO:0051640	organelle localization	346	6	2.54	493	0.04078	0.1033	1	1	Any process in which an organelle is transported to, and/or maintained in, a specific location	0.986317	-1.51393	TPGS1, IKBKG, BORCS6, HTT, CROCC, HMOX1, KIF13B, AP3D1, CLUH, SYTL3, BIN1, SYT11, LAT2, SCRIB, SPIRE2, STK11, TRAPPC9, BRAT1, CNIH2, SNAP29, MAPT, KIF14, SUN2, HPS6, MAP1S, PLEKHM2, MAP4, TRAPPC6A, COL7A1, WASL, TMED9, ZNF593, SEC16A, SEC24C, DENND1A, GAB2, HHEX, AP3S2, SAR1B, SNAP23, ACTN4, CBL, CLN3, TMEM201, CHMP7, MUL1, KAT2A, GAK, DNAJC5, PIK3CD, PLD2, BLOC1S4	CENPQ, GEM, DCTN4, PDCD10, OPHN1, FMN2, NUSAP1, CHMP2B, PFN2, YWHAZ, PIBF1, DNM1L, SEC22B, TRAPPC6B, RAB6A, ITGA4, CDC23, TMEM230, DLGAP5, AREG, SDAD1, SEC31A, NIN, ABCE1, RAB11A, ASPM, BECN1, SCFD1, KIF18A, CALM2, AP3S1, LTV1, ARL8B, BBS7, CEP120, MCFD2, INTS13, SEH1L, SPDL1, VAMP7, SNX4, STX11, NUP88, VPS4B, SYT1, RAP1B, NMD3, TMED2, LRPPRC, CDC42, ZW10, RAB1A, LYN, NDC80, SYNJ2BP, TMED10, AP3B…
GO:0072358	cardiovascular system development	347	6	2.55	1543	0.04126	0.4847	1	1	The process whose specific outcome is the progression of the cardiovascular system over time, from its formation to the mature structure. The cardiovascular system is the anatomical system that has as its parts the heart and blood vessels	1.00345	-1.5218	ADAM8, TIE1, FZD8, SUFU, NOTCH1, TGFB1, HMOX1, PGF, CTSH, RAPGEF1, TBX2, APOE, RNH1, CSPG4, DCTN5, SPHK1, PLCD1, STK11, FAM129B, HDAC5, VAV2, TGFBI, HSPG2, DAB2IP, EGFL7, ACTA2, RAMP1, SIRT6, CUL7, TNFSF12, LAMA5, COL18A1, NFATC4, AAMP, HHEX, CCM2, E2F8, B9D1, LRP1, SNX17, JUNB, SPHK2, POFUT1, PRKD2, SMAD6, PPP3R1, LTBP1, LIF, CPLANE1, ADGRB2, FZD5, CD34, VEZF1, FMNL3, FOXO4, ANG, BAK1, PDGFRB, E…	ITGB1, COL3A1, ERAP1, STAT1, NFE2L2, NOV, PDCD10, PDGFD, PDGFRA, GLMN, RBPJ, WARS2, MYLK, MTDH, PKD2, HPSE, EPC1, UBP1, RASA1, FBXW7, CLIC4, ANKRD17, CYP1B1, GNA13, HAS2, EFNB2, IL1B, WNT5A, APOLD1, ZFP36L1, NUS1, SIRT1, C1GALT1, HOXA3, ANTXR1, DDAH1, KRIT1, QKI, TGFB2, ROCK1, TMED2, JAK1, FGF2, SERPINB7, CDC42, NKX3-1, MEIS1, ZMIZ1, SYNJ2BP, ISL1, STK4, PRRX1, PRKD1, ANXA3, SEMA5A, PTK2, COL8A1,…
GO:0071902	positive regulation of protein serine/th...	178	4	1.31	214	0.04144	0.0414	1	1	Any process that increases the rate, frequency, or extent of protein serine/threonine kinase activity	0.972551	-1.21832	ADAM8, CCNK, IKBKG, FZD8, TGFB1, MAPK11, CSPG4, MADD, MAGED1, STK11, S1PR2, C1QTNF2, MAP2K3, DAB2IP, AXIN1, UBC, TELO2, CARD10, AKAP13, PTPN1, HRAS, MAPK8IP3, CSK, DBNL, PDE6G, MAP3K11, CDC6, FZD5, CCND3, TIAM1, MUL1, PDGFRB, AVPI1, MAP3K10, MAP3K6, HSP90AB1, MAPKAPK2, PKD1, MLST8	UBE2N, PDCD10, PDGFD, DVL3, MNAT1, MAP3K20, PKD2, MAP4K5, SPAG9, IQGAP1, STK3, MAP4K3, CCNH, MAP3K7, MAP2K4, EPHA4, IL1B, WNT5A, TAOK3, CCNC, TAB2, COPS8, CALM2, CDKN1B, SIRT1, CCNT1, PSMD10, HACD3, FGF2, EGFR, CD24, STK4, RALB, SPRY2, IQGAP3, TLR4, CKS1B, CCNL1, TRAF6, MAP4K2, RAPGEF2, ALS2, ERCC6, GADD45A, PRKAA1, ATP2B4, PDGFC, ETAA1, RGCC, CCNB1, LPAR1
GO:0072599	establishment of protein localization to...	105	3	0.77	215	0.0417	0.0417	1	1	The directed movement of a protein to a specific location in the endoplasmic reticulum	0.573938	-1.02959	RPL10, RPSA, RPS19, PMM1, RPS28, RPL31, SEC61A1, RPLP2, RPS10, RPS29, RPS21, RPS5, RPL37A, RPL13, RPL18	SRP19, SRP9, RPL39, RPL15, RAB10, RPL36A, RPS3A, RPL9, SRP54, SRP14, SEC63, RPL17, SRP72, SPCS2, SSR3, RPS24, RPL30, RPL22, SEC62, RPS4X, RPL26
GO:0007249	I-kappaB kinase/NF-kappaB signaling	179	4	1.31	216	0.04216	0.0422	1	1	The process in which a signal is passed on to downstream components within the cell through the I-kappaB-kinase (IKK)-dependent activation of NF-kappaB. The cascade begins with activation of a trimeric IKK complex (consisting of catalytic kinase subunits IKKalpha and/or IKKbeta, and the regulatory scaffold protein NEMO) and ends with the regulation of transcription of target genes by NF-kappaB. I…	0.970325	-1.43689	CARD9, TNFRSF19, BST2, IKBKG, HMOX1, SPHK1, FLNA, S100A4, TICAM1, DAB2IP, UBC, AKAP13, MIB2, CCDC22, TRADD, MAPKBP1, IRF3, CARD19, RELB, PLEKHG5, TNFRSF1A, NLRP3, MUL1, PER1	ZNF675, TERF2IP, STAT1, UBE2N, NOV, GPRC5B, GJA1, ATP2C1, CARD8, ZMYND11, TRIM13, MTDH, G3BP2, LY96, GOLT1B, ANKRD17, MAP3K7, IL1B, C18orf32, NKIRAS1, TAB2, FKBP1A, SIRT1, SLC20A1, BIRC2, PSMD10, HACD3, MIER1, ROCK1, TBK1, ECT2, TMEM9B, VAPA, TSPAN6, TRIM59, PRKD1, AZI2, ZFAND6, TLR4, TRAF6, TNFAIP3, FBXW11, ASH1L, TRIM8, TFG, LPAR1
GO:0051649	establishment of localization in cell	1397	16	10.26	350	0.04232	0.0698	1	1	The directed movement of a substance or cellular entity, such as a protein complex or organelle, to a specific location within, or in the membrane of, a cell	1.38072	-1.77388	CRYAB, TSNARE1, BST2, IKBKG, WDR33, PPFIA3, TOM1, IPO4, SUFU, HTT, TGFB1, HMOX1, TAP1, KIF13B, TSPO, AP3D1, AKR1C3, SYTL3, SIL1, SYT11, TAP2, APOE, LAT2, PEX6, TRPM2, RANGAP1, GAS6, SCRIB, SREBF1, DCTN5, HYAL2, SPHK1, SPPL3, FLNA, TRPM4, RPL10, SPIRE2, RAB11FIP5, THRA, PTCH1, TBC1D22A, RPSA, PACS2, AP1B1, CPT1A, TRAPPC9, DNLZ, JPH2, CNIH2, FAM160A2, SNAP29, PLK3, KATNB1, TIMM44, MAPT, KIF14, PEX1…	CENPQ, GEM, UBE2D3, BNIP3L, SLU7, AGFG1, PPT1, WDR35, KPNA3, PEX3, IFT74, DCTN4, NOV, RPGR, PDCD10, OPHN1, TMEM167A, FMN2, PIK3R1, SRP19, NUSAP1, CHMP2B, HSP90AA1, PEX12, TRAM1, PFN2, SRP9, DYNC1LI1, SNX3, YWHAZ, PIBF1, DNM1L, UGCG, TIMM17A, SEC22B, TOMM20, HSPB11, SNX2, NPM1, RPL39, AP1S2, TRAPPC6B, VPS36, SNX13, PPP1CC, COG5, RPL15, ZFYVE16, C2CD5, NPEPPS, MON2, WDR75, RSRC1, REEP1, NUP35, ICK,…
GO:0007049	cell cycle	1284	15	9.43	549	0.04247	0.1154	1	1	The progression of biochemical and morphological phases and events that occur in a cell during successive cell replication or nuclear replication events. Canonically, the cell cycle comprises the replication and segregation of genetic material followed by the division of the cell, but in endocycles or syncytial cells nuclear replication or nuclear division may not be followed by cell division	1.08958	-1.91003	TMEM8B, CCNK, PSMA6, PIDD1, REC8, ARAP1, RTEL1, HTT, CROCC, TGFB1, GDPD5, SSSCA1, LZTS1, CDK20, ZNF703, BIN1, DAPK3, GFI1, PKMYT1, ANAPC2, FBXL15, RANGAP1, GAS6, MADD, RAB11FIP3, CDK9, SCRIB, ATRIP, SPHK1, FLNA, PSMB10, KLHL22, SPIRE2, PTPA, CDK19, STK11, ZNF16, MAU2, PTCH1, USP3, SEPT6, MAPK12, SYCE1L, PARD6A, BOP1, ALMS1, PLK3, KATNB1, LAMTOR4, SEPT9, KIF14, CCNO, SPECC1L, PNPT1, DAB2IP, RASSF1…	ITGB1, CENPQ, CCNG1, GEM, NEDD1, PSMD5, ITGB3BP, CETN2, LRRCC1, RNASEH2B, MTBP, CUL5, TOPBP1, POLE2, PHIP, YEATS4, CETN3, FMN2, ZNF655, NUSAP1, CHMP2B, HSP90AA1, GSPT1, DYNC1LI1, PIBF1, MNAT1, MAP3K20, PRIM1, GSPT2, PSMD12, NPM1, ARPP19, PPP1CC, DDIAS, PSMA4, MYBL1, DYNLT3, CLOCK, UBA3, SMC4, CDC7, PSMC6, CEP55, PRKACB, CENPK, NUP35, CDC27, BUB1, CKAP2, CNOT8, CDKN2B, CDC23, DBF4, HAUS3, ZMYND11,…
GO:0051253	negative regulation of RNA metabolic pro...	742	10	5.45	218	0.04286	0.0429	1	1	Any process that stops, prevents, or reduces the frequency, rate or extent of the chemical reactions and pathways involving RNA	0.99427	-1.6975	LRP8, KLF16, FZD8, SUFU, HES6, NOTCH1, TGFB1, SBNO2, ZNF219, CTNNBIP1, ZNF703, ZGLP1, BAHD1, TBX2, GFI1, GLIS2, HIC2, GAS6, SCX, CDK9, SREBF1, MAGED1, FLNA, RPL10, SCMH1, THRA, PITX1, PTCH1, ZKSCAN3, USP3, FAM129B, CBX6, CCDC85B, MBD3, PLK3, GON4L, NR1H2, HDAC5, KLF12, PPM1F, DAB2IP, NELFB, AXIN1, ARHGAP35, ZHX2, MXD3, APBB1, SIRT6, UBC, KCNIP3, RECQL5, CCAR1, KMT2D, HINFP, CIC, HSF1, TNRC18, CEB…	ZNF675, FAM220A, UBE2D3, DYRK1A, THRB, STAT1, ZBTB33, PTBP3, HAT1, BAZ2A, ZBTB1, KDM5A, ZNF224, SUMO1, EED, RARB, BPTF, TRIM33, TBL1XR1, CGGBP1, RNF20, CLOCK, RBPJ, UBA3, CREB1, TDP2, HIST1H2AC, ZMYND11, TRIM13, PTPRK, MTDH, WWP1, CBX3, WWTR1, EPC1, UBP1, NFIL3, ZNF217, DKK1, MTERF3, ABCE1, BASP1, WNT5A, ZNF93, IRF2, CHCHD3, PTBP2, GLIS3, SMURF2, SIM2, CNBP, SAP30, STRAP, BTAF1, TRIM24, CDKN1B, S…
GO:0002093	auditory receptor cell morphogenesis	6	1	0.04	219	0.04326	0.0433	1	1	Any process that alters the size or shape of an auditory receptor cell	0.0401245	0.0401245	SCRIB
GO:0006568	tryptophan metabolic process	6	1	0.04	220	0.04326	0.0433	1	1	The chemical reactions and pathways involving tryptophan, the chiral amino acid 2-amino-3-(1H-indol-3-yl)propanoic acid	0.200152	0.200152	SLC3A2
GO:0006586	indolalkylamine metabolic process	6	1	0.04	221	0.04326	0.0433	1	1	The chemical reactions and pathways involving indolalkylamines, indole or indole derivatives containing a primary, secondary, or tertiary amine group	0.200152	0.200152	SLC3A2
GO:0006670	sphingosine metabolic process	6	1	0.04	222	0.04326	0.0433	1	1	The chemical reactions and pathways involving sphingosine (sphing-4-enine), trans-D-erytho-2-amino-octadec-4-ene-1,3-diol, a long chain amino diol sphingoid base that occurs in most sphingolipids in animal tissues	0.124986	0.124986	SPHK1, SPHK2
GO:0010988	regulation of low-density lipoprotein pa...	6	1	0.04	223	0.04326	0.0433	1	1	Any process that modulates the rate, frequency or extent of low-density lipoprotein particle clearance. Low-density lipoprotein particle clearance is the process in which a low-density lipoprotein particle is removed from the blood via receptor-mediated endocytosis and its constituent parts degraded	0.233377	0.233377	CNPY2, CSK
GO:0010992	ubiquitin homeostasis	6	1	0.04	224	0.04326	0.0433	1	1	Any process involved in the maintenance of an internal steady state of ubiquitin monomers and free ubiquitin chains at the level of the cell	-0.0598472	-0.0598472	UBC	TRIM6
GO:0030207	chondroitin sulfate catabolic process	6	1	0.04	225	0.04326	0.0433	1	1	The chemical reactions and pathways resulting in the breakdown of chondroitin sulfate, any member of a group of 10-60 kDa glycosaminoglycans, widely distributed in cartilage and other mammalian connective tissues, the repeat units of which consist of beta-(1,4)-linked D-glucuronyl beta-(1,3)-N-acetyl-D-galactosamine sulfate	0.00289561	0.00289561	CSPG4, IDUA	VCAN, HEXB
GO:0030948	negative regulation of vascular endothel...	6	1	0.04	226	0.04326	0.0433	1	1	Any process that stops, prevents, or reduces the frequency, rate or extent of vascular endothelial growth factor receptor signaling pathway activity	0.364966	0.364966	FAM129B, DAB2IP, PTPN1, HHEX
GO:0033632	regulation of cell-cell adhesion mediate...	6	1	0.04	227	0.04326	0.0433	1	1	Any process that modulates the frequency, rate, or extent of cell-cell adhesion mediated by integrin	0.14466	0.14466	PIEZO1	DPP4
GO:0034111	negative regulation of homotypic cell-ce...	6	1	0.04	228	0.04326	0.0433	1	1	Any process that stops, prevents, or reduces the frequency, rate, or extent of homotypic cell-cell adhesion	0.0188563	0.0188563	ZNF703
GO:0034331	cell junction maintenance	6	1	0.04	229	0.04326	0.0433	1	1	The organization process that preserves a cell junction in a stable functional or structural state. A cell junction is a specialized region of connection between two cells or between a cell and the extracellular matrix	-0.129538	-0.129538	KIFC3, PARD6A	RASSF8, PKP2, PLEKHA7
GO:0038180	nerve growth factor signaling pathway	6	1	0.04	230	0.04326	0.0433	1	1	A series of molecular signals initiated by the binding of nerve growth factor (NGF) to a receptor on the surface of the target cell, and ending with regulation of a downstream cellular process, e.g. transcription	0.0222377	0.0222377	RAPGEF1, CORO1A	RAPGEF2
GO:0040037	negative regulation of fibroblast growth...	6	1	0.04	231	0.04326	0.0433	1	1	Any process that stops, prevents, or reduces the frequency, rate or extent of fibroblast growth factor receptor signaling pathway activity	-0.253056	-0.253056	GPC1, FUZ	SHISA2, WNT5A, SPRY2, GATA3
GO:0043090	amino acid import	6	1	0.04	2084	0.04326	1	1	1	The directed movement of amino acids into a cell or organelle	0.0141113	0.0141113	SLC3A2, SLC7A2, CLN8	SLC1A1, SLC1A3
GO:0048312	intracellular distribution of mitochondr...	6	1	0.04	232	0.04326	0.0433	1	1	Any process that establishes the spatial arrangement of mitochondria within the cell	0.0382595	0.0382595	CLUH, MAPT, KAT2A	DNM1L, SYNJ2BP
GO:0060074	synapse maturation	6	1	0.04	233	0.04326	0.0433	1	1	The process that organizes a synapse so that it attains its fully functional state. Synaptic maturation plays a critical role in the establishment of effective synaptic connections in early development	0.249898	0.249898	ANAPC2, DAB2IP, NFATC4	NRXN3
GO:0060263	regulation of respiratory burst	6	1	0.04	2085	0.04326	1	1	1	Any process that modulates the rate frequency or extent of a phase of elevated metabolic activity, during which oxygen consumption increases; this leads to the production, by an NADH dependent system, of hydrogen peroxide (H2O2), superoxide anions and hydroxyl radicals	0.409556	0.409556	NOXA1, RPS19, BCR
GO:0071280	cellular response to copper ion	6	1	0.04	234	0.04326	0.0433	1	1	Any process that results in a change in state or activity of a cell (in terms of movement, secretion, enzyme production, gene expression, etc.) as a result of a copper ion stimulus	-0.269177	-0.269177	HSF1	PRNP, BECN1
GO:0090128	regulation of synapse maturation	6	1	0.04	235	0.04326	0.0433	1	1	Any process that modulates the extent of synapse maturation, the process that organizes a synapse so that it attains its fully functional state	0.249898	0.249898	ANAPC2, DAB2IP, NFATC4	NRXN3
GO:0097120	receptor localization to synapse	6	1	0.04	236	0.04326	0.0433	1	1	Any process in which a receptor is transported to, and/or maintained at the synapse, the junction between a nerve fiber of one neuron and another neuron or muscle fiber or glial cell	0.176692	0.176692	SCRIB, CNIH2, DLG3	CEP112
GO:1904526	regulation of microtubule binding	6	1	0.04	237	0.04326	0.0433	1	1		0.143181	0.143181	HSF1	MAPRE1
GO:1904706	negative regulation of vascular smooth m...	6	1	0.04	238	0.04326	0.0433	1	1		-0.0216294	-0.0216294	HMOX1	CDKN1B, TPM1
GO:0022607	cellular component assembly	1751	19	12.86	847	0.04348	0.2045	1	1	The aggregation, arrangement and bonding together of a cellular component	1.32624	-1.88297	CRYAB, TPGS1, PREX1, BRF1, REC8, IBA57, CRTC1, IPO4, ARAP1, ITGB4, VILL, RTEL1, PANX2, NPHP4, NOTCH1, HTT, NPHP1, CROCC, GRWD1, NDUFA11, TGFB1, HMOX1, TLN2, WRAP53, COL6A2, THSD4, SDK1, ADAMTS16, CTNNBIP1, ABCA7, ZNF703, BIN1, DAPK3, PIEZO1, RAPGEF1, BAHD1, PC, SYT11, WASF3, CLIP3, APOE, TRPM2, GAS6, ATG2A, P2RX6, WDR5, FLNA, RPL10, SPIRE2, THRA, STK11, DGKD, SYCE1L, PARD6A, FBF1, RPSA, DDX28, PA…	ITGB1, CENPQ, WIPF1, ARPC5, SLU7, RPF1, NEDD1, PSMD5, ITGB3BP, CETN2, DNAJC28, AGFG1, PTGES3, RHOQ, WDR35, KPNA3, PRPF39, POT1, IFT74, HAT1, RPGR, PDCD10, ZBTB1, OPHN1, FMN2, PIK3R1, CAPZA1, SRP19, PHLDB2, GJA1, CHMP2B, HSP90AA1, GTF2F2, PFN2, YWHAZ, EIF2A, TMEM33, NIFK, PIBF1, MNAT1, SUMO1, ADNP, DNM1L, SEC22B, TOMM20, HSPB11, SNX2, EIF2AK2, NPM1, ABCC4, PDGFRA, TRAPPC6B, VPS36, UQCRB, NAP1L1, R…
GO:0030490	maturation of SSU-rRNA	46	2	0.34	239	0.04467	0.0447	1	1	Any process involved in the maturation of a precursor Small SubUnit (SSU) ribosomal RNA (rRNA) molecule into a mature SSU-rRNA molecule	0.49366	-0.778006	TBL3, RPSA, RPS19, RPS28, RPS21	UTP3, MPHOSPH10, NOL11, UTP23, MRPS9, UTP4, UTP14C, RIOK1, HEATR1, DCAF13, UTP18, RPS24, UTP6
GO:0007050	cell cycle arrest	183	4	1.34	240	0.04511	0.0451	1	1	A regulatory process that halts progression through the cell cycle during one of the normal phases (G1, S, G2, M)	0.862798	-1.19468	CCNK, PIDD1, TGFB1, BIN1, GAS6, CDK9, STK11, MAPK12, PLK3, LAMTOR4, PNPT1, DAB2IP, RASSF1, APBB1, UBC, HRAS, ZBTB49, MUC1, TFAP4, WDR6, PPP2R5B, PPP2R3B, FOXM1, TNKS1BP1, TBRG4, MDM4, FOXO4, RBL2, GAS2L1, HSP90AB1, PKD1, E2F1, MLST8, MYBBP1A	MTBP, CUL5, MAP3K20, NPM1, DDIAS, CNOT8, CDKN2B, PKD2, KAT2B, STRADB, PRNP, PCNA, CDKN1B, CNOT2, NOTCH2, CDKN3, MSH2, TRIAP1, CNOT1, RB1, TGFB2, RRAGB, UHMK1, CNOT4, NKX3-1, PRKAB2, CUL2, CDK6, PA2G4, CDK7, CNOT6, ATM, CASP2, CNOT10, TGFBR1, EP300, UHRF2, KHDRBS1, SETMAR, SOX4, GADD45A, PRKAA1, CNOT9, RGCC, CCNB1, RPL26
GO:0050896	response to stimulus	4182	38	30.7	1512	0.04511	0.4694	1	1	Any process that results in a change in state or activity of a cell or an organism (in terms of movement, secretion, enzyme production, gene expression, etc.) as a result of a stimulus. The process begins with detection of the stimulus and ends with a change in state or activity or the cell or organism	1.88847	-2.11926	CRYAB, SPNS2, HTRA1, IGFBP7, SPP1, TMX1, SEMA6C, TSPAN9, APLP1, ADAM11, LAG3, ADAM8, CARD9, TNFRSF19, BST2, AKAP10, AL928654.3, TIE1, LRP8, CCNK, PSMA6, ADAMTS1, PIDD1, ANKRD23, PRKAR1B, IKBKG, RHOF, KLF16, PREX1, EGLN2, REC8, FZD8, WDR33, CRTC1, TOM1, ARAP1, ITGB4, STMN3, RTEL1, PANX2, NEURL1B, SUFU, RGS12, NPHP4, EXOSC6, SLC27A4, RHOBTB2, NOTCH1, FAM83G, SBK2, TREX2, HTT, IGFBP2, TSPAN10, NPHP1…	ITGB1, YPEL5, ZNF675, KLF3, GEM, CD58, ARRDC3, UBE2D3, SH3BGRL, BNIP3L, HIGD1A, WIPF1, ARPC5, SNRK, SLU7, PSMD5, EEF1E1, ITGB3BP, CETN2, PLPP5, BCHE, RNASEH2B, PPT1, DYRK1A, PTGES3, ALKBH8, RHOQ, UCHL5, CUL5, WDR35, TANC1, UTRN, TERF2IP, TOPBP1, THRB, COL3A1, BICC1, ERAP1, CADM1, STAT1, UBE2N, NFE2L2, XPR1, POLE2, PHIP, IFT74, ZBTB33, HAT1, C3orf58, NOV, NETO2, RPGR, TENT2, PDCD10, LINC02210-CRHR…
GO:0006029	proteoglycan metabolic process	47	2	0.35	241	0.04644	0.0464	1	1	The chemical reactions and pathways involving proteoglycans, any glycoprotein in which the carbohydrate units are glycosaminoglycans	0.616864	-0.814639	CSPG4, PXYLP1, GPC1, NDST2, CHPF2, B3GALT6, IDUA, SGSH, PPARD, B4GALT7, B3GAT3, GAL3ST4, CHST12, CHPF, EXTL3	EXTL2, VCAN, HPSE, COL11A1, DSE, IMPAD1, HS3ST3A1, B3GAT2, HEXB
GO:1901215	negative regulation of neuron death	110	3	0.81	242	0.0468	0.0468	1	1	Any process that stops, prevents or reduces the frequency, rate or extent of neuron death	0.822029	-0.944103	ADAM8, IKBKG, HMOX1, APOE, GCLM, KIF14, TMEM259, TYRO3, HRAS, HSF1, CEBPB, HYOU1, AMBRA1, BCL2L1, CBL, LRP1, CLN3, UCN, WFS1, CD34, EIF4G1, NRBP2, DNAJC5, HSP90AB1, CORO1A, SOD2	PPT1, ADNP, CREB1, RASA1, MAP2K4, SIRT1, MSH2, VPS35, ROCK1, SET, AXL, NONO, ISL1, HSPD1, PRKCI, SERPINF1, BHLHB9, IL6, GCLC, BTBD10, OXR1
GO:0007167	enzyme linked receptor protein signaling...	552	8	4.05	776	0.04788	0.1783	1	1	Any series of molecular signals initiated by the binding of an extracellular ligand to a receptor on the surface of the target cell, where the receptor possesses catalytic activity or is closely associated with an enzyme such as a protein kinase, and ending with regulation of a downstream cellular process, e.g. transcription	1.06893	-1.55544	HTRA1, ARAP1, NOTCH1, FAM83G, IGFBP2, FGFR3, TGFB1, MAPK11, EFNB1, CSF1, PGF, CNPY2, ZNF703, RAPGEF1, SOCS7, FBXL15, GAS6, CSPG4, SCX, SREBF1, NEO1, IGFBP5, STK11, DGKD, MAPK12, PARD6A, FAM129B, GPC1, VAV2, SIK2, DAB2IP, BCAR1, UBC, TNK2, XIAP, PTPN1, UBE2O, WASL, HRAS, BCR, RASSF2, GAB2, HHEX, FUZ, ATP6V1C2, PILRB, CSK, DGKQ, CBL, VASN, LRP1, NBL1, GIGYF1, PDE6G, PPP2R5B, SOCS4, PRKD2, TRIO, MVB…	UBE2D3, ARPC5, RHOQ, CUL5, COL3A1, PHIP, NOV, PDGFD, PIK3R1, COL4A5, HSP90AA1, GTF2F2, CPNE3, TRIM33, PDGFRA, RNF111, ZFYVE16, RTN4, RBPJ, C2CD5, CREB1, CDKN2B, PTPRK, WWTR1, SOCS5, IQGAP1, RASA1, GDF6, AREG, FBXW7, DKK1, RGMB, SUB1, MAP3K7, SHISA2, EFNB2, EPHA4, IL1B, ARF4, NCKAP1, WNT5A, PTPN12, SLC9A6, SMURF2, GDF11, STRAP, YES1, FKBP1A, POLR2K, TTK, CRIM1, ATP6V1D, LMBRD1, SIRT1, MET, ING2, A…
GO:0007165	signal transduction	2754	27	20.22	1043	0.04808	0.2728	1	1	The cellular process in which a signal is conveyed to trigger a change in the activity or state of a cell. Signal transduction begins with reception of a signal (e.g. a ligand binding to a receptor or receptor activation by a stimulus such as light), or for signal transduction in the absence of ligand, signal-withdrawal or the activity of a constitutively active receptor. Signal transduction ends…	1.74481	-2.03048	CRYAB, SPNS2, HTRA1, TSPAN9, APLP1, ADAM11, LAG3, ADAM8, CARD9, TNFRSF19, BST2, AKAP10, AL928654.3, TIE1, LRP8, PSMA6, ADAMTS1, PIDD1, IKBKG, RHOF, KLF16, PREX1, EGLN2, FZD8, ARAP1, ITGB4, STMN3, NEURL1B, SUFU, RGS12, NPHP4, RHOBTB2, NOTCH1, FAM83G, SBK2, HTT, IGFBP2, TSPAN10, NPHP1, FGFR3, TGFB1, MEF2D, HMOX1, MAPK11, EFNB1, KIF13B, TSPO, SZT2, CSF1, GDPD5, TNFRSF25, ISG15, PGF, NPB, ZNF219, CTN…	ITGB1, ZNF675, GEM, ARRDC3, UBE2D3, SH3BGRL, BNIP3L, WIPF1, ARPC5, SNRK, PSMD5, EEF1E1, ITGB3BP, PLPP5, DYRK1A, PTGES3, RHOQ, CUL5, WDR35, TERF2IP, TOPBP1, THRB, COL3A1, BICC1, ERAP1, STAT1, UBE2N, NFE2L2, XPR1, PHIP, IFT74, ZBTB33, C3orf58, NOV, NETO2, PDCD10, LINC02210-CRHR1, TNFRSF11B, LRRC1, OPHN1, FMN2, PDGFD, PIK3R1, PPP2R5E, TIAM2, GPRC5B, UBE2D2, GKAP1, GJA1, COL4A5, DVL3, CPE, TAF5, PRKD…
GO:0006886	intracellular protein transport	863	11	6.34	243	0.04808	0.0481	1	1	The directed movement of proteins in a cell, including the movement of proteins between specific compartments or structures within a cell, such as organelles of a eukaryotic cell	1.04636	-1.62713	TSNARE1, WDR33, TOM1, IPO4, SUFU, TGFB1, TAP1, KIF13B, TSPO, AP3D1, AKR1C3, SYTL3, SIL1, TAP2, PEX6, RANGAP1, GAS6, SREBF1, HYAL2, SPHK1, SPPL3, FLNA, RPL10, THRA, PTCH1, TBC1D22A, RPSA, PACS2, AP1B1, DNLZ, PLK3, KATNB1, TIMM44, PEX16, DAB2IP, JUP, STX16, EHD3, ZDHHC8, RPS19, ATG4B, SYNGR1, TBC1D14, RAMP1, CDC40, GGA1, TMEM129, STIMATE, KCNIP3, SNX8, TBC1D13, UNC93B1, PTPN1, KLC1, CTTN, BCR, BAP1…	UBE2D3, BNIP3L, SLU7, AGFG1, WDR35, KPNA3, PEX3, IFT74, NOV, RPGR, PIK3R1, SRP19, HSP90AA1, PEX12, TRAM1, SRP9, YWHAZ, UGCG, TIMM17A, TOMM20, HSPB11, SNX2, NPM1, RPL39, AP1S2, VPS36, SNX13, RPL15, ZFYVE16, C2CD5, NPEPPS, WDR75, NUP35, ICK, RAB6A, TRNT1, TNPO1, PKD2, WWTR1, STRADB, NUPL2, PRNP, FBXW7, G3BP2, CSNK2A2, NUP54, SDAD1, SSB, KPNA4, RANBP6, RPL36A, ABCE1, THOC7, ARL6IP1, IL1B, RHBDD1, UB…
GO:0048584	positive regulation of response to stimu...	1081	13	7.94	858	0.04815	0.2052	1	1	Any process that activates, maintains or increases the rate of a response to a stimulus. Response to stimulus is a change in state or activity of a cell or an organism (in terms of movement, secretion, enzyme production, gene expression, etc.) as a result of a stimulus	1.21668	-1.77668	LAG3, ADAM8, CARD9, TNFRSF19, BST2, PSMA6, PIDD1, IKBKG, FZD8, ARAP1, EXOSC6, NOTCH1, HTT, FGFR3, TGFB1, HMOX1, MAPK11, CSF1, PGF, MC1R, AKR1C3, ABCA7, DAPK3, CTSH, RAPGEF1, GFI1, PLXNB1, LAT2, FBXL15, GAS6, CSPG4, MADD, SEMA7A, NEO1, IGFBP5, HYAL2, SPHK1, MAGED1, SPPL3, FLNA, PSMB10, TRPM4, S100A4, HLX, CDK19, STK11, TICAM1, RFNG, TKFC, JPH2, S1PR2, LAMTOR4, C1R, TMEM259, C1QTNF2, MAP2K3, VAV2, …	ARRDC3, UBE2D3, SH3BGRL, WIPF1, ARPC5, PSMD5, EEF1E1, WDR35, TERF2IP, COL3A1, CADM1, UBE2N, NFE2L2, PHIP, NOV, PDCD10, ZBTB1, PDGFD, PIK3R1, GPRC5B, UBE2D2, GJA1, DVL3, HSP90AA1, ARL6IP5, YWHAZ, EIF2A, ATP2C1, TMEM33, PIBF1, MAP3K20, DNM1L, EIF2AK2, PSMD12, PDGFRA, RYK, PSMA4, RNF111, CLOCK, RTN4, RBPJ, C2CD5, CDKN2AIP, PSMC6, UBE3A, MAP3K1, PRKACB, CDKN2B, TAF9, MYLK, TRIM13, MTDH, PKD2, HPSE, M…
GO:0016239	positive regulation of macroautophagy	48	2	0.35	245	0.04824	0.0482	1	1	Any process, such as recognition of nutrient depletion, that activates or increases the rate of macroautophagy to bring cytosolic macromolecules to the vacuole/lysosome for degradation	0.607532	-0.881208	IKBKG, HTT, HMOX1, VPS13C, LRSAM1, SESN2, CLEC16A	BNIP3L, TRIM13, SCOC, MAP3K7, BECN1, SIRT1, TBK1, RALB, EPM2A, SH3GLB1, PIP4K2A, WAC
GO:0033209	tumor necrosis factor-mediated signaling...	112	3	0.82	2086	0.04892	1	1	1	A series of molecular signals initiated by the binding of a tumor necrosis factor to a receptor on the surface of a cell, and ending with regulation of a downstream cellular process, e.g. transcription	0.927014	-1.33817	TNFRSF19, PSMA6, IKBKG, TNFRSF25, SPPL2B, CLIP3, GAS6, MADD, SPHK1, PSMB10, UBC, TNFSF12, CDIP1, TRADD, PELI3, TNFRSF1A, HSPA1B, TNFSF9, HIPK1	ZNF675, PSMD5, STAT1, TNFRSF11B, RFFL, PSMD12, PSMA4, PSMC6, PSMA1, BIRC2, PSMD10, SPPL2A, PSMD14, PSMD6, PSMD7, PSMA3, TNFAIP3
GO:0044265	cellular macromolecule catabolic process	760	10	5.58	246	0.04914	0.0491	1	1	The chemical reactions and pathways resulting in the breakdown of a macromolecule, any large molecule including proteins, nucleic acids and carbohydrates, as carried out by individual cells	0.940169	-1.66289	PSMA6, SUFU, EXOSC6, POP1, USP43, DNASE1L2, ISG15, TRPC4AP, ZSWIM9, CTSH, ABTB1, APOE, ANAPC2, FBXL15, RNH1, TOLLIP, PSMB10, RPL10, USP3, RPSA, FBXL19, PLK3, KIF14, CTSV, GPC1, PNPT1, DAB2IP, RNF166, AXIN1, DNASE1, RPS19, CLN6, ZHX2, UBC, TMEM129, CUL7, DENND3, KCTD17, DVL1, AMER1, ZNRF1, HSF1, BAP1, CCDC22, KLHL25, WWP2, RNF216, POMT2, UPF1, SGSH, USP35, SKIV2L, DHX34, CBL, CLN8, RPS28, UQCC2, U…	UBE2D3, BNIP3L, PSMD5, RNASEH2B, PPT1, UCHL5, CUL5, EIF3E, UBE2N, NFE2L2, ZMPSTE24, TENT2, OPHN1, UBE2D2, PAIP1, GSPT1, FBXO8, USP38, SUMO1, RFFL, GSPT2, PSMD12, RPL39, TBL1XR1, VPS36, GLMN, PNRC2, RPL15, PSMA4, RNF20, RNF111, CLOCK, PSMC6, UBE3A, USP14, CDC27, TOPORS, CNOT8, TATDN1, CDC23, TAF9, TRIM13, PDCD6IP, WWP1, VPS37A, HPSE, EDEM3, WWTR1, SOCS5, RC3H1, UBE2A, TMTC3, FBXW7, PSMA1, FBXL3, P…
GO:0016043	cellular component organization	3804	35	27.93	1384	0.04988	0.3952	1	1	A process that results in the assembly, arrangement of constituent parts, or disassembly of a cellular component	1.83431	-1.9925	CRYAB, HTRA1, IGFBP7, OSGIN1, SPP1, TSNARE1, SEMA6C, ADAM8, TPGS1, BST2, FTCD, TIE1, LRP8, CCNK, TUBB2A, PHC1, RHOF, PREX1, BRF1, EGLN2, REC8, IBA57, CRTC1, IPO4, ARAP1, LRFN3, ITGB4, VILL, STMN3, RTEL1, PANX2, NPHP4, NOTCH1, HTT, IGFBP2, NPHP1, CROCC, GRWD1, NDUFA11, TGFB1, HMOX1, NRF1, LAMA2, TLN2, CERS2, EFNB1, RAB4B-EGLN2, TRPV2, PPIL2, TAP1, KIF13B, TSPO, SCN1B, OLFML2A, WRAP53, COL6A2, SZT2…	ITGB1, CENPQ, CCNG1, GEM, UBE2D3, BNIP3L, WIPF1, ARPC5, SLU7, RPF1, NEDD1, PSMD5, ITGB3BP, CETN2, LRRCC1, DNAJC28, MTBP, AGFG1, ACTR6, PPT1, PTGES3, RHOQ, WDR35, KPNA3, CLVS1, TANC1, UTRN, TERF2IP, COL3A1, PRPF39, PEX3, CADM1, UBE2N, NFE2L2, POLE2, POT1, ZMYM6, PHIP, YEATS4, IFT74, ZMPSTE24, SLC25A46, CETN3, HAT1, BAZ2A, NOV, RPGR, PDCD10, TNFRSF11B, ZBTB1, SNX14, OPHN1, FMN2, PIK3R1, CAPZA1, SRP…
GO:0051726	regulation of cell cycle	762	10	5.59	247	0.04988	0.0499	1	1	Any process that modulates the rate or extent of progression through the cell cycle	1.01119	-1.73721	TMEM8B, CCNK, PSMA6, PIDD1, TGFB1, GDPD5, CDK20, ZNF703, BIN1, DAPK3, PKMYT1, ANAPC2, GAS6, MADD, CDK9, SCRIB, ATRIP, SPHK1, PSMB10, KLHL22, CDK19, STK11, ZNF16, PTCH1, MAPK12, BOP1, PLK3, LAMTOR4, KIF14, PNPT1, DAB2IP, RASSF1, APBB1, E2F2, UBC, CUL7, HINFP, DCLRE1B, HRAS, HSF1, BCR, ZBTB49, BAP1, MUC1, TFAP4, HHEX, CXCR5, KLHL21, BCL2L1, AURKAIP1, E2F8, HUS1, ANAPC11, JUNB, WDR6, PPP2R5B, PPP2R3…	ITGB1, CCNG1, PSMD5, CETN2, RNASEH2B, MTBP, CUL5, TOPBP1, PHIP, ZNF655, NUSAP1, CHMP2B, DYNC1LI1, MNAT1, MAP3K20, PSMD12, NPM1, DDIAS, PSMA4, DYNLT3, CLOCK, UBA3, CDC7, PSMC6, PRKACB, CDC27, BUB1, CNOT8, CDKN2B, CDC23, PDCD6IP, PTPRK, PKD2, GTF2H1, CCNYL1, CCNI, KAT2B, PRKAR1A, NAE1, INTS7, DLGAP5, STRADB, PRNP, FBXW7, PSMA1, SYF2, PCNA, CCNH, CSNK2A2, ANKRD17, BRCC3, SPIN2B, HECA, RAB11A, IL1B, …

## Sheet: top 250 upreg
GO id	Term	Genes in genome (background)	Genes in top-250 upreg	Expected genes in top-250 upreg	Rank in P.Fisher.elim	P.Fisher	P.Fisher.elim	FDR.Fisher	FDR.Fisher.elim	Description	Avg.LogFC for top-10 upreg	Avg.LogFC for top-10 downreg	Upreg genes (LogFC > 0.4)	Downreg genes (LogFC < -0.4)
GO:0045047	protein targeting to ER	102	10	2.48	1246	0.00018	0.19287	0.733333	1	The process of directing proteins towards the endoplasmic reticulum (ER) using signals contained within the protein. One common mechanism uses a 16- to 30-residue signal sequence, typically located at the N-terminus of the protein and containing positively charged amino acids followed by a continuous stretch of hydrophobic residues, which directs the ribosome to the ER membrane and initiates tran…	0.573938	-0.991534	RPL10, RPSA, RPS19, PMM1, RPS28, RPL31, SEC61A1, RPLP2, RPS10, RPS29, RPS21, RPS5, RPL37A, RPL13, RPL18	SRP19, SRP9, RPL39, RPL15, RPL36A, RPS3A, RPL9, SRP54, SRP14, SEC63, RPL17, SRP72, SPCS2, SSR3, RPS24, RPL30, RPL22, SEC62, RPS4X, RPL26
GO:0000028	ribosomal small subunit assembly	13	4	0.32	1	0.0002	0.0002	0.733333	1	The aggregation, arrangement and bonding together of constituent RNAs and proteins to form the small ribosomal subunit	0.340611	0.0688615	RPSA, RPS19, RPS28, RPS10
GO:0072599	establishment of protein localization to...	105	10	2.55	1518	0.00022	0.24855	0.733333	1	The directed movement of a protein to a specific location in the endoplasmic reticulum	0.573938	-1.02959	RPL10, RPSA, RPS19, PMM1, RPS28, RPL31, SEC61A1, RPLP2, RPS10, RPS29, RPS21, RPS5, RPL37A, RPL13, RPL18	SRP19, SRP9, RPL39, RPL15, RAB10, RPL36A, RPS3A, RPL9, SRP54, SRP14, SEC63, RPL17, SRP72, SPCS2, SSR3, RPS24, RPL30, RPL22, SEC62, RPS4X, RPL26
GO:0006614	SRP-dependent cotranslational protein ta...	93	9	2.26	2	0.00041	0.00041	0.92	1	The targeting of proteins to a membrane that occurs during translation and is dependent upon two key components, the signal-recognition particle (SRP) and the SRP receptor. SRP is a cytosolic particle that transiently binds to the endoplasmic reticulum (ER) signal sequence in a nascent protein, to the large ribosomal unit, and to the SRP receptor in the ER membrane	0.560579	-0.991534	RPL10, RPSA, RPS19, RPS28, RPL31, SEC61A1, RPLP2, RPS10, RPS29, RPS21, RPS5, RPL37A, RPL13, RPL18	SRP19, SRP9, RPL39, RPL15, RPL36A, RPS3A, RPL9, SRP54, SRP14, SEC63, RPL17, SRP72, SSR3, RPS24, RPL30, RPL22, RPS4X, RPL26
GO:0010867	positive regulation of triglyceride bios...	7	3	0.17	3	0.00046	0.00046	0.92	1	Any process that increases the rate, frequency, or extent of triglyceride biosynthesis. Triglyceride biosynthesis is the collection of chemical reactions and pathways resulting in the formation of triglyceride, any triester of glycerol	0.418465	0.418465	SREBF1, NR1H2, LDLR, CTDNEP1, SCARB1	CNEP1R1
GO:0006613	cotranslational protein targeting to mem...	98	9	2.38	3879	0.0006	1	1	1	The targeting of proteins to a membrane that occurs during translation. The transport of most secretory proteins, particularly those with more than 100 amino acids, into the endoplasmic reticulum lumen occurs in this manner, as does the import of some proteins into mitochondria	0.560579	-1.06328	RPL10, RPSA, RPS19, RPS28, RPL31, SEC61A1, RPLP2, RPS10, RPS29, RPS21, RPS5, RPL37A, RPL13, RPL18	SRP19, TRAM1, SRP9, RPL39, RPL15, RPL36A, ARL6IP1, RPS3A, RPL9, SRP54, SRP14, SEC63, RPL17, SSR1, SRP72, SSR3, RPS24, RPL30, RPL22, SEC62, RPS4X, RPL26
GO:0070972	protein localization to endoplasmic reti...	121	10	2.94	2577	0.0007	0.48694	1	1	A process in which a protein is transported to, or maintained in, a location within the endoplasmic reticulum	0.597304	-1.09454	RPL10, RPSA, PEX16, RPS19, PMM1, RPS28, RPL31, SEC61A1, RPLP2, RPS10, RPS29, RPS21, RPS5, RPL37A, RPL13, RPL18	SRP19, SRP9, RPL39, RPL15, RTN4, RAB10, KDELR3, RPL36A, RPS3A, RPL9, SRP54, SRP14, SEC63, RPL17, SRP72, SPCS2, VAPA, SSR3, RPS24, RPL30, RPL22, SEC62, ANKRD13C, RPS4X, RPL26
GO:0042255	ribosome assembly	46	6	1.12	1219	0.0008	0.18568	1	1	The aggregation, arrangement and bonding together of the mature ribosome and of its subunits	0.585094	-0.886534	RPL10, RPSA, DDX28, RPS19, DHX30, RPS28, NOP53, RPS10, NSUN4	RPF1, EIF2A, NPM1, BRIX1, MTERF3, SBDS, MTERF4, FASTKD2, RPF2
GO:0010866	regulation of triglyceride biosynthetic ...	9	3	0.22	3880	0.00106	1	1	1	Any process that modulates the rate, frequency, or extent of triglyceride biosynthesis. Triglyceride biosynthesis is the collection of chemical reactions and pathways resulting in the formation of triglyceride, any triester of glycerol	0.246617	0.246617	SREBF1, NR1H2, LDLR, CTDNEP1, SCARB1	FBXW7, CNEP1R1
GO:0090208	positive regulation of triglyceride meta...	9	3	0.22	3881	0.00106	1	1	1	Any process that increases the frequency, rate or extent of the chemical reactions and pathways involving triglyceride, any triester of glycerol	0.273096	0.273096	SREBF1, NR1H2, LDLR, CTDNEP1, SCARB1	ABHD5, CNEP1R1
GO:0044712	single-organism catabolic process	533	25	12.94	12	0.00114	0.00598	1	1	A catabolic process - chemical reactions and pathways resulting in the breakdown of substances - which involves a single organism	1.07187	-1.57074	SPP1, FTCD, PNPLA7, SLC27A4, HTT, HMOX1, TSPO, COL6A2, NEIL1, PDE4A, ALDH4A1, AKR1C3, APOE, CSPG4, SREBF1, ATG2A, MAN2C1, SPHK1, MRC2, THRA, PLCD1, TKFC, INPP5E, CPT1A, TST, NTHL1, PFKL, TMEM259, NUDT18, GPC1, ABCD1, PYGB, ACACB, COL6A1, ZDHHC8, PHYKPL, ATG4B, LDLR, SIRT6, GAA, TMEM129, ACSF3, AMDHD2, GLYCTK, COL7A1, GALK1, COL18A1, GCAT, CTTN, ALDH2, MPST, SLC3A2, POMT2, VPS13C, POR, BCAT2, IDUA…	ITGB1, BNIP3L, PPT1, COL3A1, NFE2L2, HSD17B11, COL4A5, GPD2, NAPEPLD, DNM1L, ABCD3, COL5A2, TBL1XR1, VCAN, ACADSB, PSMC6, ADO, WDR75, USP14, TRIM13, LIPA, HPSE, EDEM3, AGL, FBXW7, CSNK2A2, CYP1B1, PCYOX1, COL11A1, USP25, HPRT1, IL1B, RHBDD1, MCCC2, BECN1, UBE2J1, STT3B, LUM, YWHAH, FUNDC1, CALM2, HNMT, PPP1CB, FUCA2, GYG1, AUH, COL12A1, DDAH1, MAP1LC3B, RAB7A, PEX2, JKAMP, ACADM, NT5E, ABHD10, AL…
GO:0003241	growth involved in heart morphogenesis	3	2	0.07	4	0.00173	0.00173	1	1	Developmental growth that contributes to the shaping of the heart	0.46987	0.46987	NOTCH1, SIRT6
GO:0034383	low-density lipoprotein particle clearan...	12	3	0.29	5	0.00264	0.00264	1	1	The process in which a low-density lipoprotein particle is removed from the blood via receptor-mediated endocytosis and its constituent parts degraded	0.474353	0.242489	HMOX1, CNPY2, LDLR, WASHC1, CSK, SCARB1
GO:0000187	activation of MAPK activity	79	7	1.92	6	0.00298	0.00298	1	1	The initiation of the activity of the inactive enzyme MAP kinase (MAPK)	0.844507	-0.997333	ADAM8, IKBKG, MAPK11, CSPG4, MADD, S1PR2, C1QTNF2, MAP2K3, DAB2IP, AXIN1, UBC, AKAP13, PTPN1, MAPK8IP3, DBNL, PDE6G, MAP3K11, MUL1, AVPI1, MAP3K10, MAP3K6, MAPKAPK2	UBE2N, MAP3K20, MAP4K5, SPAG9, MAP3K7, MAP2K4, IL1B, WNT5A, TAB2, HACD3, FGF2, IQGAP3, TLR4, TRAF6, MAP4K2, ERCC6, PRKAA1, LPAR1
GO:0031033	myosin filament organization	4	2	0.1	7	0.00341	0.00341	1	1	A process that is carried out at the cellular level which results in the assembly, arrangement of constituent parts, or disassembly of a filament composed of myosin molecules	0.281356	0.281356	DAPK3, OBSL1	RAP1GDS1
GO:0009056	catabolic process	1529	53	37.13	3224	0.00349	0.68666	1	1	The chemical reactions and pathways resulting in the breakdown of substances, including the breakdown of carbon compounds with the liberation of energy for use by the cell or organism	1.1966	-1.77797	SPP1, ADAM8, FTCD, PNPLA7, PSMA6, IKBKG, EGLN2, ITGB4, SUFU, EXOSC6, SLC27A4, HTT, POP1, TGFB1, USP43, HMOX1, TSPO, COL6A2, DNASE1L2, NEIL1, ISG15, LZTS1, PDE4A, ALDH4A1, TRPC4AP, AKR1C3, ZSWIM9, DAPK3, CTSH, ABTB1, APOE, ANAPC2, FBXL15, RNH1, CSPG4, SREBF1, ATG2A, TOLLIP, MAN2C1, HYAL2, SPHK1, FLNA, PSMB10, MRC2, RPL10, THRA, PLCD1, STK11, TICAM1, GGT7, ZKSCAN3, USP3, TKFC, INPP5E, RPSA, PACS2, …	ITGB1, UBE2D3, BNIP3L, PSMD5, RNASEH2B, PPT1, DRAM2, UCHL5, CUL5, EIF3E, COL3A1, ERAP1, UBE2N, NFE2L2, ZMPSTE24, TENT2, SNX14, OPHN1, FMN2, HSD17B11, UBE2D2, GJA1, COL4A5, CHMP2B, HSP90AA1, GPD2, PAIP1, GSPT1, FBXO8, SNX3, NAPEPLD, USP38, SUMO1, DNM1L, RFFL, SEC22B, GSPT2, TOMM20, ABCD3, COL5A2, PSMD12, RPL39, TBL1XR1, VPS36, GLMN, PNRC2, RPL15, PSMA4, RNF20, RNF111, VCAN, CLOCK, ACADSB, NPEPPS, …
GO:0032508	DNA duplex unwinding	64	6	1.55	8	0.00444	0.00444	1	1	The process in which interchain hydrogen bonds between two strands of DNA are broken or 'melted', generating a region of unpaired single strands	0.636158	-0.837944	RTEL1, PIF1, GTF2H3, UBC, RECQL5, MCM2, RECQL4, CHD3, MCM7, HMGA1, GINS1, IGHMBP2	CETN2, POT1, CHD1, GTF2H1, GTF2H2, BRIP1, XPA, SUPV3L1, RECQL, XRCC5
GO:0010507	negative regulation of autophagy	46	5	1.12	9	0.00492	0.00492	1	1	Any process that stops, prevents, or reduces the frequency, rate or extent of autophagy. Autophagy is the process in which cells digest parts of their own cytoplasm	0.670096	-0.492001	HMOX1, TSPO, LZTS1, ZKSCAN3, TBC1D14, WASHC1, WDR6, QSOX1, EIF4G1, CLEC16A, NRBP2	SCFD1, TAB2, MET, RUBCN, RNF5
GO:0097006	regulation of plasma lipoprotein particl...	29	4	0.7	1937	0.00499	0.33833	1	1	Any process involved in the maintenance of internal levels of plasma lipoprotein particles within an organism	0.676109	-0.339271	HMOX1, CNPY2, ABCA7, APOE, NR1H2, LDLR, WASHC1, CSK, SCARB1	ABCA5, AGTR1, ACSL3
GO:0090207	regulation of triglyceride metabolic pro...	15	3	0.36	3882	0.00518	1	1	1	Any process that modulates the frequency, rate or extent of the chemical reactions and pathways involving triglyceride, any triester of glycerol	0.45697	-0.246203	APOE, SREBF1, NR1H2, LDLR, CTDNEP1, SCARB1	TBL1XR1, FBXW7, ABHD5, PANK2, CNEP1R1
GO:0032274	gonadotropin secretion	5	2	0.12	10	0.00559	0.00559	1	1	The regulated release of a gonadotropin, any hormone that stimulates the gonads, especially follicle-stimulating hormone and luteinizing hormone	0.1457	0.1457	FAM129B, KISS1	TMF1
GO:0035914	skeletal muscle cell differentiation	30	4	0.73	11	0.00565	0.00565	1	1	The process in which a relatively unspecialized cell acquires specialized features of a skeletal muscle cell, a somatic cell located in skeletal muscle	0.559528	-0.536552	NOTCH1, MEF2D, SCX, GPC1, UQCC2, GTF3C5	SAP30, DDX17, COPS2, DDX5, RB1
GO:0031329	regulation of cellular catabolic process	479	21	11.63	359	0.00618	0.05402	1	1	Any process that modulates the frequency, rate or extent of the chemical reactions and pathways resulting in the breakdown of substances, carried out by individual cells	1.00115	-1.45964	ADAM8, PSMA6, IKBKG, SUFU, HTT, HMOX1, TSPO, LZTS1, DAPK3, APOE, ANAPC2, SREBF1, PSMB10, STK11, TICAM1, ZKSCAN3, CPT1A, PLK3, MAPT, PNPT1, DAB2IP, ACACB, RNF166, AXIN1, ZDHHC8, LDLR, TBC1D14, UBC, DEPDC5, WASHC1, DVL1, AMER1, PTPN1, TFEB, CTTN, HSF1, CCDC22, WDR24, VPS13C, ATP6V1C2, UPF1, AMBRA1, DHX34, UQCC2, ANAPC11, WDR6, PLEKHF1, QSOX1, SOCS4, LRSAM1, PTPN3, FZD5, BAG6, PSAP, ANAPC7, TPCN1, P…	BNIP3L, PSMD5, DRAM2, UCHL5, NFE2L2, OPHN1, SUMO1, DNM1L, PSMD12, GLMN, PSMA4, PSMC6, WDR75, UBE3A, USP14, CDC27, CNOT8, CDC23, TAF9, TRIM13, MTDH, EXOC8, SCOC, SOCS5, RC3H1, TMTC3, FBXW7, PSMA1, TMEM59, CSNK2A2, MAP3K7, IL1B, BECN1, RNF14, RNF19A, SCFD1, EXOC1, ANAPC10, TAB2, HNRNPR, ZFP36L1, ATP6V1D, SIRT1, TMF1, MET, PPP1CB, BBS7, ARIH1, UBE2E1, PSMD10, CNOT1, PIKFYVE, TBC1D12, VPS35, PABPC1, …
GO:0034381	plasma lipoprotein particle clearance	16	3	0.39	3883	0.00626	1	1	1	The process in which a lipoprotein particle is removed from the blood via receptor-mediated endocytosis and its constituent parts degraded	0.579568	0.0868774	HMOX1, CNPY2, APOE, LDLR, WASHC1, CSK, SCARB1
GO:1901565	organonitrogen compound catabolic proces...	191	11	4.64	13	0.0068	0.0068	1	1	The chemical reactions and pathways resulting in the breakdown of organonitrogen compound	0.89538	-1.1473	FTCD, TGFB1, HMOX1, NEIL1, PDE4A, ALDH4A1, CTSH, CSPG4, HYAL2, SPHK1, GGT7, TST, NTHL1, NUDT18, GPC1, HSPG2, PHYKPL, LDLR, SDC3, ECE1, SATL1, GCAT, NAGLU, MPST, SLC3A2, GPC2, BCAT2, IDUA, SGSH, ITPA, OGDH, NEU3, SMPD1, ACAD8, HGSNAT, SCARB1, SAMHD1, HYAL3, AGRN, SMPD4, ENTPD4	PPT1, ERAP1, VCAN, ACADSB, NPEPPS, ADO, HPSE, HMMR, PCYOX1, HPRT1, MCCC2, GPC5, LUM, TPP1, HNMT, AUH, DDAH1, FGF2, NT5E, ALDH5A1, CTBS, CD44, MBD4, GLS, APOBEC3C, TDG, HIBCH, CHAC2, NUDT9, UNG, NUDT15, PNPLA8, LTA4H, BCKDHB, PPM1K, EGLN1, NT5C3A, CARNMT1, MTRR, ATP2B4, CHP1, HIBADH, HEXB
GO:0022618	ribonucleoprotein complex assembly	165	10	4.01	1018	0.00686	0.15575	1	1	The aggregation, arrangement and bonding together of proteins and RNA molecules to form a ribonucleoprotein complex	0.646144	-1.36678	RPL10, RPSA, DDX28, RPS19, SRPK3, DHX30, SNRPB, TARBP2, AAR2, RPS28, SNRNP200, NOP53, RPS10, CD2BP2, PRPF6, EDC3, PRPF31, NSUN4, HSP90AB1	SLU7, RPF1, PTGES3, PRPF39, HSP90AA1, EIF2A, NPM1, BRIX1, PSIP1, TAF9, RC3H1, G3BP2, MTERF3, PUM2, PTBP2, STRAP, EIF5, CRNKL1, CNOT2, RBMX, EIF4B, SRPK1, YTHDC1, SBDS, CNOT1, SNRPG, PAN3, CDC73, GEMIN2, CLNS1A, DENR, RBM22, SHQ1, MCTS1, LUC7L3, LUC7L2, MTERF4, CNOT6, LSM14A, ATM, ZNHIT6, PATL1, SNW1, SNRPE, FASTKD2, SF3B1, RPF2, PRPF18
GO:1901361	organic cyclic compound catabolic proces...	332	16	8.06	897	0.0069	0.13335	1	1	The chemical reactions and pathways resulting in the breakdown of organic cyclic compound	1.01952	-1.34011	SPP1, FTCD, EXOSC6, POP1, HMOX1, DNASE1L2, NEIL1, PDE4A, ALDH4A1, APOE, RNH1, RPL10, RPSA, NTHL1, NUDT18, PNPT1, DNASE1, RPS19, ZHX2, HSF1, SLC3A2, UPF1, HSD17B14, SKIV2L, DHX34, ITPA, RPS28, RPL31, SNX17, RPLP2, TNKS1BP1, RPS10, HSPA1B, PKP3, SECISBP2, EDC3, EIF4G1, RPS29, RPS21, SCARB1, SAMHD1, RPS5, RPL37A, RPL13, RPL18, AC022384.1, EXOSC4, LSM7, ENTPD4	RNASEH2B, EIF3E, TENT2, HSD17B11, PAIP1, GSPT1, GSPT2, RPL39, PNRC2, RPL15, CNOT8, TATDN1, RC3H1, SSB, DIS3, RPL36A, HPRT1, UPF2, MTREX, LSM1, YWHAH, RPS3A, RPL9, HNRNPR, ZFP36L1, CNOT2, EIF4B, HNMT, EIF4A2, DDX5, CNOT1, EXOSC3, RPL17, TTC37, PABPC1, LRPPRC, NT5E, CNOT4, PAN3, EXOSC9, PPP2R2A, TOB1, MBD4, HBS1L, APOBEC3C, TDG, PPP1R8, CSDE1, NUDT9, CNOT6, ZC3HAV1, HNRNPD, ATM, PATL1, DCP2, UNG, N…
GO:0090630	activation of GTPase activity	51	5	1.24	14	0.00765	0.00765	1	1		0.608781	-0.623071	SCRIB, PLEKHG4, TBC1D22A, TBC1D14, TBC1D13, TBC1D22B, RALGAPA2, EVI5L, SYDE1, TBC1D2, TIAM1, SGSM2, TAX1BP3, EPHA1, TBC1D25, RCC2	WNT5A, EIF5, TBC1D12, TBCK, TBC1D8, ECT2, RABGAP1L, RASGRF1, PIP5K1A
GO:0043406	positive regulation of MAP kinase activi...	118	8	2.87	2987	0.00791	0.60849	1	1	Any process that activates or increases the frequency, rate or extent of MAP kinase activity	0.919047	-1.17316	ADAM8, IKBKG, FZD8, TGFB1, MAPK11, CSPG4, MADD, MAGED1, S1PR2, C1QTNF2, MAP2K3, DAB2IP, AXIN1, UBC, AKAP13, PTPN1, HRAS, MAPK8IP3, CSK, DBNL, PDE6G, MAP3K11, FZD5, TIAM1, MUL1, PDGFRB, AVPI1, MAP3K10, MAP3K6, MAPKAPK2	UBE2N, PDCD10, PDGFD, DVL3, MAP3K20, MAP4K5, SPAG9, IQGAP1, MAP3K7, MAP2K4, EPHA4, IL1B, WNT5A, TAOK3, TAB2, HACD3, FGF2, EGFR, CD24, IQGAP3, TLR4, TRAF6, MAP4K2, ERCC6, PRKAA1, PDGFC, LPAR1
GO:0000184	nuclear-transcribed mRNA catabolic proce...	119	8	2.89	15	0.00831	0.00831	1	1	The nonsense-mediated decay pathway for nuclear-transcribed mRNAs degrades mRNAs in which an amino-acid codon has changed to a nonsense codon; this prevents the translation of such mRNAs into truncated, and potentially harmful, proteins	0.583785	-1.10903	RPL10, RPSA, RPS19, UPF1, SKIV2L, DHX34, RPS28, RPL31, RPLP2, RPS10, SECISBP2, EIF4G1, RPS29, RPS21, RPS5, RPL37A, RPL13, RPL18	EIF3E, GSPT1, GSPT2, RPL39, PNRC2, RPL15, RPL36A, UPF2, RPS3A, RPL9, RPL17, PABPC1, PPP2R2A, DCP2, RPS24, RPL30, RPL22, RPS4X, RPL26
GO:0032392	DNA geometric change	73	6	1.77	3884	0.00842	1	1	1	The process in which a transformation is induced in the geometry of a DNA double helix, resulting in a change in twist, writhe, or both, but with no change in linking number. Includes the unwinding of double-stranded DNA by helicases	0.645932	-0.892283	RTEL1, PIF1, GTF2H3, UBC, RECQL5, MCM2, RECQL4, RAD54L, CHD3, MCM7, HMGA1, GINS1, IGHMBP2	CETN2, POT1, CHD1, GTF2H1, MTERF1, SMARCA1, GTF2H2, BRIP1, XPA, SUPV3L1, HMGB3, RECQL, XRCC5
GO:0046164	alcohol catabolic process	18	3	0.44	16	0.0088	0.0088	1	1	The chemical reactions and pathways resulting in the breakdown of alcohols, any of a class of compounds containing one or more hydroxyl groups attached to a saturated carbon atom	0.459414	-0.354225	AKR1C3, APOE, INPP5E, ALDH2, SNX17, SCARB1	GPD2, ALDH1B1, GK, IMPA1
GO:0048519	negative regulation of biological proces...	2815	85	68.36	394	0.00919	0.06492	1	1	Any process that stops, prevents, or reduces the frequency, rate or extent of a biological process. Biological processes are regulated by many means; examples include the control of gene expression, protein modification or interaction with a protein or substrate molecule	1.81046	-2.00252	CRYAB, HTRA1, IGFBP7, OSGIN1, SPP1, WDR81, APLP1, LAG3, ADAM8, BST2, LMTK3, TIE1, LRP8, CCNK, PSMA6, ADAMTS1, PIDD1, PRKAR1B, IKBKG, WFIKKN1, KLF16, PREX1, FZD8, CRTC1, ARAP1, VILL, STMN3, RTEL1, SUFU, RGS12, NPHP4, HES6, EXOSC6, NOTCH1, HTT, IGFBP2, FGFR3, TGFB1, HMOX1, MAPK11, CERS2, TSPO, SZT2, NEIL1, SBNO2, GDPD5, ISG15, LZTS1, ZNF219, CTNNBIP1, CNPY2, SLC35F6, MC1R, AKR1C3, ABCA7, RGS3, ZNF7…	ITGB1, ZNF675, FAM220A, ARRDC3, UBE2D3, BNIP3L, HIGD1A, PSMD5, CAMK2N1, EEF1E1, BCHE, RNASEH2B, MTBP, PPT1, DYRK1A, RHOQ, UCHL5, CUL5, WDR35, EIF3E, TERF2IP, TOPBP1, THRB, IREB2, COL3A1, BICC1, STAT1, NFE2L2, POT1, PHIP, IFT74, ZBTB33, PTBP3, HAT1, BAZ2A, NOV, TENT2, PDCD10, LINC02210-CRHR1, TNFRSF11B, ZBTB1, OPHN1, FMN2, PIK3R1, CAPZA1, ZNF655, PHLDB2, GJA1, DVL3, LRRC17, KDM5A, ARL6IP5, PAIP1, …
GO:0046700	heterocycle catabolic process	314	15	7.63	1209	0.00949	0.18049	1	1	The chemical reactions and pathways resulting in the breakdown of heterocyclic compounds, those with a cyclic molecular structure and at least two different atoms in the ring (or rings)	0.924494	-1.30825	FTCD, EXOSC6, POP1, HMOX1, DNASE1L2, NEIL1, PDE4A, ALDH4A1, RNH1, RPL10, RPSA, NTHL1, NUDT18, PNPT1, DNASE1, RPS19, ZHX2, HSF1, SLC3A2, UPF1, SKIV2L, DHX34, ITPA, RPS28, RPL31, RPLP2, TNKS1BP1, RPS10, HSPA1B, PKP3, SECISBP2, EDC3, EIF4G1, RPS29, RPS21, SAMHD1, RPS5, RPL37A, RPL13, RPL18, AC022384.1, EXOSC4, LSM7, ENTPD4	RNASEH2B, EIF3E, TENT2, PAIP1, GSPT1, GSPT2, RPL39, PNRC2, RPL15, CNOT8, TATDN1, RC3H1, SSB, DIS3, RPL36A, HPRT1, UPF2, MTREX, LSM1, RPS3A, RPL9, HNRNPR, ZFP36L1, CNOT2, EIF4B, HNMT, EIF4A2, DDX5, CNOT1, EXOSC3, RPL17, TTC37, PABPC1, LRPPRC, NT5E, CNOT4, PAN3, EXOSC9, PPP2R2A, TOB1, MBD4, HBS1L, APOBEC3C, TDG, PPP1R8, CSDE1, NUDT9, CNOT6, ZC3HAV1, HNRNPD, ATM, PATL1, DCP2, UNG, NUDT15, SUPV3L1, C…
GO:0071826	ribonucleoprotein complex subunit organi...	174	10	4.23	1220	0.00982	0.18707	1	1	Any process in which macromolecules aggregate, disaggregate, or are modified, resulting in the formation, disassembly, or alteration of a ribonucleoprotein complex	0.652874	-1.37933	RPL10, RPSA, DDX28, RPS19, SRPK3, DHX30, SNRPB, KLC1, TARBP2, AAR2, RPS28, SNRNP200, NOP53, RPS10, CD2BP2, PRPF6, EDC3, PRPF31, NSUN4, HSP90AB1	SLU7, RPF1, PTGES3, PRPF39, HSP90AA1, EIF2A, NPM1, MTIF3, BRIX1, PSIP1, TAF9, RC3H1, G3BP2, MTERF3, PUM2, PTBP2, STRAP, EIF5, CRNKL1, CNOT2, RBMX, EIF4B, SRPK1, YTHDC1, SBDS, CNOT1, SNRPG, PAN3, CDC73, GEMIN2, CLNS1A, DENR, RBM22, SHQ1, MCTS1, LUC7L3, LUC7L2, MTERF4, CNOT6, LSM14A, ATM, ZNHIT6, PATL1, SNW1, SNRPE, KIF5B, GFM2, MTIF2, FASTKD2, SF3B1, RPF2, PRPF18
GO:0070265	necrotic cell death	35	4	0.85	17	0.00982	0.00982	1	1	A type of cell death that is morphologically characterized by an increasingly translucent cytoplasm, swelling of organelles, minor ultrastructural modifications of the nucleus (specifically, dilatation of the nuclear membrane and condensation of chromatin into small, irregular, circumscribed patches) and increased cell volume (oncosis), culminating in the disruption of the plasma membrane and sub…	0.58064	-0.540768	TSPO, TICAM1, ALKBH7, UBC, TRADD, IRF3, UCN, PGAM5	DNM1L, LY96, BIRC2, TMEM123, TLR4
GO:1902041	regulation of extrinsic apoptotic signal...	35	4	0.85	18	0.00982	0.00982	1	1	Any process that modulates the frequency, rate or extent of extrinsic apoptotic signaling pathway via death domain receptors	0.54543	-0.495152	PIDD1, HMOX1, MADD, TRADD, BCL2L1	RFFL, STK3, STK4, TNFAIP3
GO:0009894	regulation of catabolic process	565	23	13.72	405	0.01007	0.06988	1	1	Any process that modulates the frequency, rate, or extent of the chemical reactions and pathways resulting in the breakdown of substances	1.02695	-1.63256	ADAM8, PSMA6, IKBKG, EGLN2, SUFU, HTT, HMOX1, TSPO, LZTS1, DAPK3, APOE, ANAPC2, SREBF1, FLNA, PSMB10, THRA, STK11, TICAM1, ZKSCAN3, CPT1A, PLK3, MAPT, TMEM259, PNPT1, DAB2IP, ACACB, RNF166, AXIN1, ZDHHC8, ATG4B, LDLR, TBC1D14, SIRT6, GGA1, UBC, DEPDC5, TNFSF12, WASHC1, DVL1, AMER1, PTPN1, TFEB, CTTN, HSF1, RHBDD3, CCDC22, WDR24, VPS13C, ATP6V1C2, AZIN2, UPF1, AMBRA1, DHX34, BANP, UQCC2, ANAPC11, …	ITGB1, BNIP3L, PSMD5, DRAM2, UCHL5, NFE2L2, OPHN1, FMN2, GJA1, SNX3, SUMO1, DNM1L, SEC22B, PSMD12, GLMN, PSMA4, PSMC6, WDR75, UBE3A, AZIN1, USP14, CDC27, CNOT8, CDC23, TAF9, TRIM13, MTDH, EXOC8, SCOC, SOCS5, RC3H1, TMTC3, FBXW7, PSMA1, TMEM59, CSNK2A2, MAP3K7, USP25, IL1B, BECN1, RNF14, WNT5A, UBE2J1, RNF19A, SCFD1, EXOC1, ANAPC10, TAB2, HNRNPR, ZFP36L1, ATP6V1D, CDKN1B, SIRT1, TMF1, MET, PPP1CB,…
GO:0006940	regulation of smooth muscle contraction	19	3	0.46	19	0.01027	0.01027	1	1	Any process that modulates the frequency, rate or extent of smooth muscle contraction	0.272636	-0.341183	DAPK3, SPHK1, CTTN	OXTR, RGS2
GO:0007519	skeletal muscle tissue development	77	6	1.87	1828	0.01083	0.31038	1	1	The developmental sequence of events leading to the formation of adult skeletal muscle tissue. The main events are: the fusion of myoblasts to form myotubes that increase in size by further fusion to them of myoblasts, the formation of myofibrils within their cytoplasm and the establishment of functional neuromuscular junctions with motor neurons. At this stage they can be regarded as mature musc…	0.778749	-0.668652	NOTCH1, TGFB1, MEF2D, SCX, HLX, PITX1, FAM129B, GPC1, SRPK3, UQCC2, GTF3C5, USP19	DKK1, SAP30, DDX17, COPS2, DDX5, RB1, VGLL2, EP300, PRKAA1, RPS6KB1, MYORG
GO:2000779	regulation of double-strand break repair	36	4	0.87	20	0.01084	0.01084	1	1	Any process that modulates the frequency, rate or extent of double-strand break repair	0.516	-0.560707	RTEL1, SIRT6, RECQL5, HSF1, FOXM1, PPP4R2	TERF2IP, DEK, TRIP12, SETMAR, RPA2, SLF1
GO:0006268	DNA unwinding involved in DNA replicatio...	7	2	0.17	21	0.01138	0.01138	1	1	The process in which interchain hydrogen bonds between two strands of DNA are broken or 'melted', generating unpaired template strands for DNA replication	0.225769	0.225769	MCM2, MCM7, HMGA1
GO:0009304	tRNA transcription	7	2	0.17	22	0.01138	0.01138	1	1	The synthesis of transfer RNA (tRNA) from a DNA template	0.00312222	0.00312222	BRF1, GTF3C1, GTF3C5	GTF3C3
GO:0048711	positive regulation of astrocyte differe...	7	2	0.17	23	0.01138	0.01138	1	1	Any process that activates or increases the frequency, rate or extent of astrocyte differentiation	0.316197	0.316197	NOTCH1, BIN1, LIF
GO:0071902	positive regulation of protein serine/th...	178	10	4.32	2291	0.01141	0.41795	1	1	Any process that increases the rate, frequency, or extent of protein serine/threonine kinase activity	0.972551	-1.21832	ADAM8, CCNK, IKBKG, FZD8, TGFB1, MAPK11, CSPG4, MADD, MAGED1, STK11, S1PR2, C1QTNF2, MAP2K3, DAB2IP, AXIN1, UBC, TELO2, CARD10, AKAP13, PTPN1, HRAS, MAPK8IP3, CSK, DBNL, PDE6G, MAP3K11, CDC6, FZD5, CCND3, TIAM1, MUL1, PDGFRB, AVPI1, MAP3K10, MAP3K6, HSP90AB1, MAPKAPK2, PKD1, MLST8	UBE2N, PDCD10, PDGFD, DVL3, MNAT1, MAP3K20, PKD2, MAP4K5, SPAG9, IQGAP1, STK3, MAP4K3, CCNH, MAP3K7, MAP2K4, EPHA4, IL1B, WNT5A, TAOK3, CCNC, TAB2, COPS8, CALM2, CDKN1B, SIRT1, CCNT1, PSMD10, HACD3, FGF2, EGFR, CD24, STK4, RALB, SPRY2, IQGAP3, TLR4, CKS1B, CCNL1, TRAF6, MAP4K2, RAPGEF2, ALS2, ERCC6, GADD45A, PRKAA1, ATP2B4, PDGFC, ETAA1, RGCC, CCNB1, LPAR1
GO:0060986	endocrine hormone secretion	20	3	0.49	1774	0.01187	0.30636	1	1	The regulated release of a hormone into the circulatory system	0.360957	-0.59126	RAB11FIP3, RAB11FIP5, FAM129B, KISS1, UCN	LINC02210-CRHR1, IL1B, TMF1, AGTR1, NKX3-1, GATA3
GO:1903053	regulation of extracellular matrix organ...	20	3	0.49	24	0.01187	0.01187	1	1	Any process that modulates the frequency, rate or extent of extracellular matrix organization	0.466881	-0.499555	NOTCH1, TGFB1, FSCN1, LRP1, CST3	PHLDB2, ANTXR1, TGFB2, DPP4, CLASP2, RGCC
GO:0051641	cellular localization	1773	57	43.06	521	0.012	0.07849	1	1	A localization process that takes place at the cellular level; as a result of a cellular localization process, a substance or cellular entity, such as a protein complex or organelle, is transported to, and/or maintained in, a specific location within or in the membrane of a cell	1.41535	-1.90257	CRYAB, TSNARE1, TPGS1, BST2, IKBKG, WDR33, PPFIA3, TOM1, IPO4, SUFU, BORCS6, HTT, TSPAN10, CROCC, TGFB1, HMOX1, TLN2, PPIL2, TAP1, KIF13B, TSPO, WRAP53, SZT2, AP3D1, CLUH, AKR1C3, ABCA7, SYTL3, BIN1, SIL1, SYT11, GLIS2, CLIP3, TAP2, APOE, LAT2, PEX6, TRPM2, RANGAP1, GAS6, RAB11FIP3, SCRIB, SREBF1, TOLLIP, DCTN5, HYAL2, SPHK1, SPPL3, EXOC3, FLNA, TRPM4, RPL10, SPIRE2, RAB11FIP5, THRA, STK11, PTCH1…	ITGB1, CENPQ, GEM, UBE2D3, BNIP3L, SLU7, NEDD1, MTBP, AGFG1, PPT1, RHOQ, WDR35, KPNA3, TERF2IP, PEX3, POT1, IFT74, DCTN4, NOV, RPGR, PDCD10, OPHN1, TMEM167A, FMN2, PIK3R1, SRP19, NUSAP1, DVL3, CPE, CHMP2B, HSP90AA1, PEX12, TRAM1, PFN2, SRP9, DYNC1LI1, SNX3, YWHAZ, GOLPH3L, TMEM33, DNAJA1, PIBF1, SUMO1, DNM1L, UGCG, TIMM17A, SEC22B, HSPH1, TOMM20, CCDC14, HSPB11, SNX2, NPM1, RPL39, AP1S2, TRAPPC6B…
GO:0009892	negative regulation of metabolic process	1702	55	41.33	987	0.01244	0.14242	1	1	Any process that stops, prevents, or reduces the frequency, rate or extent of the chemical reactions and pathways within a cell or an organism	1.49859	-1.83689	CRYAB, WDR81, APLP1, LAG3, BST2, LMTK3, LRP8, PSMA6, PRKAR1B, WFIKKN1, KLF16, PREX1, FZD8, RTEL1, SUFU, HES6, EXOSC6, NOTCH1, TGFB1, HMOX1, TSPO, NEIL1, SBNO2, ISG15, LZTS1, ZNF219, CTNNBIP1, CNPY2, AKR1C3, ABCA7, RGS3, ZNF703, DAPK3, ZGLP1, RAPGEF1, SOCS7, BAHD1, TBX2, PC, GFI1, PKMYT1, GLIS2, APOE, ANAPC2, HIC2, RNH1, GAS6, SCX, CDK9, SREBF1, IGFBP5, HYAL2, MAGED1, FLNA, PSMB10, RPL10, PTPA, SC…	ZNF675, FAM220A, ARRDC3, UBE2D3, PSMD5, CAMK2N1, RNASEH2B, DYRK1A, UCHL5, WDR35, EIF3E, TERF2IP, THRB, IREB2, STAT1, POT1, ZBTB33, PTBP3, HAT1, BAZ2A, TENT2, PDCD10, ZBTB1, OPHN1, FMN2, GJA1, KDM5A, PAIP1, GSPT1, ZNF224, SRP9, SNX3, NIFK, DNAJA1, PIBF1, SUMO1, ADNP, EED, RARB, RFFL, HSPH1, GSPT2, EIF2AK2, BPTF, PSMD12, NPM1, RPL39, FAM129A, TRIM33, ARPP19, TBL1XR1, GLMN, CGGBP1, PNRC2, RPL15, TSN…
GO:0006612	protein targeting to membrane	154	9	3.74	3885	0.01264	1	1	1	The process of directing proteins towards a membrane, usually using signals contained within the protein	0.698869	-1.18487	GAS6, RPL10, PTCH1, RPSA, PACS2, PEX16, EHD3, RPS19, ATG4B, MIEF2, RPS28, RPL31, SEC61A1, MIEF1, RPLP2, RPS10, RPS29, RPS21, RPS5, RPL37A, RPL13, RPL18	PEX3, SRP19, TRAM1, SRP9, RPL39, RPL15, C2CD5, PRNP, NUP54, RPL36A, ARL6IP1, RPS3A, RPL9, MFF, SRP54, SRP14, SEC63, VAMP7, RPL17, GOLGA7, SSR1, TMED2, SRP72, SDCBP, STOM, ATG4A, MTCL1, SSR3, PRKCI, RPS24, RPL30, RPL22, PIP5K1A, SEC62, CHP1, ATG3, RPS4X, RPL26
GO:0060538	skeletal muscle organ development	80	6	1.94	1935	0.01294	0.33686	1	1	The progression of a skeletal muscle organ over time from its initial formation to its mature state. A skeletal muscle organ includes the skeletal muscle tissue and its associated connective tissue	0.778749	-0.718995	NOTCH1, TGFB1, MEF2D, SCX, HLX, PITX1, FAM129B, GPC1, SRPK3, UQCC2, GTF3C5, USP19	DKK1, BASP1, SAP30, DDX17, COPS2, DDX5, RB1, VGLL2, EP300, DISP1, PRKAA1, RPS6KB1, MYORG
GO:0022602	ovulation cycle process	38	4	0.92	25	0.01309	0.01309	1	1	A process involved in the sexual cycle seen in females, often with physiologic changes in the endometrium that recur at regular intervals during the reproductive years	0.549633	-0.624261	ADAMTS1, CEBPB, AMH, BCL2L1, KISS1, STAT5B, ANG, KMT2B, LFNG	PDGFRA, UBE3A, SIRT1, TGFB2, ATM, CASP2, EIF2B2
GO:2001236	regulation of extrinsic apoptotic signal...	104	7	2.53	1425	0.01315	0.2284	1	1	Any process that modulates the frequency, rate or extent of extrinsic apoptotic signaling pathway	0.800803	-0.929015	PIDD1, HTT, HMOX1, DAPK3, MADD, HYAL2, GCLM, TNFSF12, CTTN, TRADD, BCL2L1, SH3RF1, PELI3, BID, HSPA1B	PHIP, RFFL, ZMYND11, STRADB, STK3, IL1B, ITGA6, TGFB2, EYA4, STK4, TNFAIP3, TGFBR1, SIAH2, GCLC, RPS6KB1
GO:0008283	cell proliferation	1063	37	25.82	26	0.01459	0.01459	1	1	The multiplication or reproduction of cells, resulting in the expansion of a cell population	1.25842	-1.67551	HTRA1, IGFBP7, BST2, AL928654.3, ADAMTS1, NOTCH1, IGFBP2, FGFR3, TGFB1, HMOX1, MAPK11, CERS2, EFNB1, TSPO, IMPDH1, CSF1, TNFRSF25, PGF, CTNNBIP1, PDXK, MIA-RAB4B, SLC35F6, AKR1C3, ZNF703, BIN1, CTSH, RAPGEF1, SPEG, TBX2, APOE, PLXNB1, GAS6, CSPG4, SCX, CDK9, SCRIB, IGFBP5, SPHK1, MAGED1, FLNA, TRPM4, HLX, PLCD1, STK11, ZNF16, TICAM1, PTCH1, FAM129B, BOP1, BRAT1, S1PR2, KIF14, CTSV, FSCN1, TGFBI, …	ITGB1, EEF1E1, BCHE, RNASEH2B, MTBP, CUL5, STAT1, PHIP, IFT74, C3orf58, NOV, PDCD10, TNFRSF11B, PDGFD, GJA1, MNAT1, MAP3K20, RARB, EIF2AK2, NPM1, ABCC4, PDGFRA, GLMN, RBBP9, NAP1L1, RYK, RTN4, RBPJ, POC1B, C18orf54, BLZF1, RAB10, GPAM, CDC7, CREB1, HIST1H2AC, MARCH7, CDC27, BUB1, TOPORS, CNOT8, CDKN2B, ZMYND11, PTPRK, PKD2, LIPA, HPSE, WWTR1, KAT2B, PRKAR1A, DLGAP5, RC3H1, PRNP, CIP2A, NRK, STK3,…
GO:0042274	ribosomal small subunit biogenesis	60	5	1.46	3201	0.01492	0.67968	1	1	A cellular process that results in the biosynthesis of constituent macromolecules, assembly, and arrangement of constituent parts of a small ribosomal subunit; includes transport to the sites of protein synthesis	0.512076	-0.805456	TBL3, RPSA, RPS19, RPS28, RPS10, RPS21	UTP3, MPHOSPH10, NOL11, UTP23, LTV1, MRPS9, UTP4, UTP14C, RIOK1, HEATR1, DCAF13, UTP18, RPS24, UTP6
GO:0006384	transcription initiation from RNA polyme...	8	2	0.19	27	0.01493	0.01493	1	1	Any process involved in the assembly of the RNA polymerase III preinitiation complex (PIC) at an RNA polymerase III promoter region of a DNA template, resulting in the subsequent synthesis of RNA from that promoter. The initiation phase includes PIC assembly and the formation of the first few bonds in the RNA chain, including abortive initiation, which occurs when the first few nucleotides are re…	0.281742	0.281742	BRF1, GTF3C1, GTF3C5
GO:0034244	negative regulation of transcription elo...	8	2	0.19	28	0.01493	0.01493	1	1	Any process that stops, prevents, or reduces the frequency, rate or extent of transcription elongation, the extension of an RNA molecule after transcription initiation and promoter clearance by the addition of ribonucleotides, catalyzed by RNA polymerase II	0.113114	0.113114	NELFB, AXIN1, RECQL5	EAPP
GO:0035089	establishment of apical/basal cell polar...	8	2	0.19	29	0.01493	0.01493	1	1	The specification and formation of the polarity of a cell along its apical/basal axis	-0.0167921	-0.0167921	SCRIB, FSCN1	WNT5A, PRKCI
GO:0046184	aldehyde biosynthetic process	8	2	0.19	30	0.01493	0.01493	1	1	The chemical reactions and pathways resulting in the formation of aldehydes, any organic compound with the formula R-CH=O	0.026215	0.026215	PDXK, TKT	KDM3A, REST
GO:0060253	negative regulation of glial cell prolif...	8	2	0.19	31	0.01493	0.01493	1	1	Any process that stops or decreases the rate or extent of glial cell proliferation	0.382261	0.382261	NOTCH1, CERS2, TSPO
GO:0060644	mammary gland epithelial cell differenti...	8	2	0.19	32	0.01493	0.01493	1	1	The process in which a relatively unspecialized epithelial cell becomes a more specialized epithelial cell of the mammary gland	0.347215	0.347215	ZNF703, PTCH1, CEBPB
GO:0060768	regulation of epithelial cell proliferat...	8	2	0.19	33	0.01493	0.01493	1	1	Any process that modulates the rate, frequency or extent of epithelial cell proliferation that contributes to the progression of the prostate gland over time	-0.0473548	-0.0473548	NOTCH1, STK11	CDKN1B, NKX3-1, SERPINF1
GO:2000188	regulation of cholesterol homeostasis	8	2	0.19	34	0.01493	0.01493	1	1	Any process that modulates the frequency, rate or extent of cholesterol homeostasis	0.357535	0.357535	NR1H2, LDLR, SREBF2
[truncated: 344 more rows]

## Sheet: top 500 upreg
GO id	Term	Genes in genome (background)	Genes in top-500 upreg	Expected genes in top-500 upreg	Rank in P.Fisher.elim	P.Fisher	P.Fisher.elim	FDR.Fisher	FDR.Fisher.elim	Description	Avg.LogFC for top-10 upreg	Avg.LogFC for top-10 downreg	Upreg genes (LogFC > 0.4)	Downreg genes (LogFC < -0.4)
[truncated: 346 more rows]

[truncated: 6 more sheets: top 1000 upreg, top 40 downreg, top 80 downreg, top 250 downreg, top 500 downreg, top 1000 downreg]
