# Supplementary material for: Effects of Siberian fir terpenes extract Abisil on antioxidant activity, autophagy, transcriptome and proteome of human fibroblasts
Source: Aging (Albany NY). 2021 Aug 24;13(16):20050–80. doi: 10.18632/aging.203448 (PMC8436938; doi:10.18632/aging.203448)
Supplement: Supplementary Table 6 [file aging-13-203448-s007.xlsx]

## Sheet: top 40 upreg
Supplementary Table 6. The results of Gene Ontology (biological processes) enrichment analysis for top 80, 250, 500 and 1000 up- or downregulated genes for the comparison of samples treated with low-concentration Abisil (50 µg/ml) to control non-treated samples.
GO id	Term	Genes in genome (background)	Genes in top-40 upreg	Expected genes in top-40 upreg	Rank in P.Fisher.elim	P.Fisher	P.Fisher.elim	FDR.Fisher	FDR.Fisher.elim	Description	Avg.LogFC for top-10 upreg	Avg.LogFC for top-10 downreg	Upreg genes (LogFC > 0.4)	Downreg genes (LogFC < -0.4)
GO:0000028	ribosomal small subunit assembly	13	3	0.04	1	9.4e-06	9.4e-06	0.044	0.06	The aggregation, arrangement and bonding together of constituent RNAs and proteins to form the small ribosomal subunit	0.390674	0.0911732	RPSA, RPS10, RPS19, RPS27L, RPS28
GO:0006614	SRP-dependent cotranslational protein ta...	93	5	0.31	2	1.2e-05	1.2e-05	0.044	0.06	The targeting of proteins to a membrane that occurs during translation and is dependent upon two key components, the signal-recognition particle (SRP) and the SRP receptor. SRP is a cytosolic particle that transiently binds to the endoplasmic reticulum (ER) signal sequence in a nascent protein, to the large ribosomal unit, and to the SRP receptor in the ER membrane	0.666801	-0.856893	RPSA, RPL31, RPS10, RPS21, RPS19, RPL10, RPL41, RPS8, RPS29, RPS12, RPL21, RPL35A, RPL37A, RPLP2, RPS27A, RPL34, RPS23, RPS28	SRP19, RPL39, RPL15, RPL36A, SRP72, SRP54, SRP14, RPL17-C18orf32, SRP9, RPL9, RPL17
GO:0006613	cotranslational protein targeting to mem...	98	5	0.33	1051	1.6e-05	1	0.044	1	The targeting of proteins to a membrane that occurs during translation. The transport of most secretory proteins, particularly those with more than 100 amino acids, into the endoplasmic reticulum lumen occurs in this manner, as does the import of some proteins into mitochondria	0.666801	-0.856893	RPSA, RPL31, RPS10, RPS21, RPS19, RPL10, RPL41, RPS8, RPS29, RPS12, RPL21, RPL35A, RPL37A, RPLP2, RPS27A, RPL34, RPS23, RPS28	SRP19, RPL39, RPL15, RPL36A, SRP72, SRP54, SRP14, RPL17-C18orf32, SRP9, RPL9, RPL17, TRAM1, SSR1
GO:0045047	protein targeting to ER	102	5	0.34	1052	2e-05	1	0.044	1	The process of directing proteins towards the endoplasmic reticulum (ER) using signals contained within the protein. One common mechanism uses a 16- to 30-residue signal sequence, typically located at the N-terminus of the protein and containing positively charged amino acids followed by a continuous stretch of hydrophobic residues, which directs the ribosome to the ER membrane and initiates tran…	0.666801	-0.85819	RPSA, RPL31, RPS10, RPS21, RPS19, RPL10, RPL41, RPS8, RPS29, RPS12, RPL21, RPL35A, RPL37A, RPLP2, RPS27A, RPL34, RPS23, PMM1, RPS28	SRP19, RPL39, RPL15, RPL36A, SRP72, SRP54, SRP14, SPCS2, RPL17-C18orf32, SRP9, RPL9, RPL17
GO:0072599	establishment of protein localization to...	105	5	0.35	1053	2.2e-05	1	0.044	1	The directed movement of a protein to a specific location in the endoplasmic reticulum	0.666801	-0.868825	RPSA, RPL31, RPS10, RPS21, RPS19, RPL10, RPL41, RPS8, RPS29, RPS12, RPL21, RPL35A, RPL37A, RPLP2, RPS27A, RPL34, RPS23, PMM1, RAB3GAP1, RPS28	SRP19, RPL39, RPL15, RPL36A, SRP72, RAB10, SRP54, SRP14, SPCS2, RPL17-C18orf32, SRP9, RPL9, RPL17
GO:0000184	nuclear-transcribed mRNA catabolic proce...	119	5	0.4	3	4.1e-05	4.1e-05	0.05625	0.136667	The nonsense-mediated decay pathway for nuclear-transcribed mRNAs degrades mRNAs in which an amino-acid codon has changed to a nonsense codon; this prevents the translation of such mRNAs into truncated, and potentially harmful, proteins	0.666801	-1.00025	RPSA, RPL31, RPS10, RPS21, RPS19, RPL10, RPL41, RPS8, RPS29, RPS12, RPL21, RPL35A, RPL37A, RPLP2, RPS27A, RPL34, RPS23, RPS28	RPL39, GSPT1, EIF3E, GSPT2, RPL15, UPF2, RPL36A, PPP2R2A, PNRC2, RPL17-C18orf32, RPL9, RPL17, PABPC1, SMG8
GO:0042274	ribosomal small subunit biogenesis	60	4	0.2	1054	4.3e-05	1	0.05625	1	A cellular process that results in the biosynthesis of constituent macromolecules, assembly, and arrangement of constituent parts of a small ribosomal subunit; includes transport to the sites of protein synthesis	0.57524	-0.68158	RPSA, RPS10, RPS21, RPS19, RPS8, FCF1, UTP11, RPS27L, RPS28	MPHOSPH10, UTP3, HEATR1, MRPS9, UTP4, NOL11, LTV1, DCAF13
GO:0070972	protein localization to endoplasmic reti...	121	5	0.4	1055	4.5e-05	1	0.05625	1	A process in which a protein is transported to, or maintained in, a location within the endoplasmic reticulum	0.666801	-0.966198	RPSA, RPL31, RPS10, RPS21, RPS19, RPL10, RPL41, RPS8, RPS29, RPS12, RPL21, RPL35A, RPL37A, RPLP2, RPS27A, RPL34, RPS23, PMM1, UBAC2, HSPA5, KDELR2, RAB3GAP1, RPS28	SRP19, RPL39, RPL15, KDELR3, RTN4, VAPA, RPL36A, SRP72, RAB10, SRP54, SRP14, SPCS2, RPL17-C18orf32, SRP9, RPL9, RPL17
GO:0032274	gonadotropin secretion	5	2	0.02	27	0.00011	0.00966	0.122222	1	The regulated release of a gonadotropin, any hormone that stimulates the gonads, especially follicle-stimulating hormone and luteinizing hormone	0.265573	0.265573	KISS1, SMAD4, FAM129B, TBX3	TMF1
GO:0006612	protein targeting to membrane	155	5	0.52	1056	0.00014	1	0.14	1	The process of directing proteins towards a membrane, usually using signals contained within the protein	0.671949	-1.00008	RPSA, RPL31, RPS10, RPS21, RPS19, RPL10, RAB8B, CDK5R1, RPL41, RPS8, RPS29, RPS12, RPL21, RPL35A, MIEF1, RPL37A, RPLP2, MIEF2, ATG4B, RPS27A, PACS2, RPL34, RPS23, PEX5, RPS28	SRP19, RPL39, RPL15, PEX3, NUP54, PRNP, SDCBP, GOLGA7, MFF, RPL36A, SRP72, SRP54, SRP14, RPL17-C18orf32, SRP9, ATG4A, RPL9, RPL17, MTCL1, C2CD5, TRAM1, SSR1, STOM, FYN
GO:0000462	maturation of SSU-rRNA from tricistronic...	32	3	0.11	15	0.00016	0.00415	0.145455	1	Any process involved in the maturation of a precursor Small SubUnit (SSU) ribosomal RNA (rRNA) molecule into a mature SSU-rRNA molecule from the pre-rRNA molecule originally produced as a tricistronic rRNA transcript that contains the Small Subunit (SSU) rRNA, 5.8S rRNA, and the Large Subunit (LSU) in that order from 5' to 3' along the primary transcript	0.503622	-0.488896	RPSA, RPS21, RPS19, RPS8, FCF1	UTP3, HEATR1, MRPS9, DCAF13
GO:0019083	viral transcription	164	5	0.55	4	0.00019	0.00019	0.158333	0.475	The process by which a viral genome, or part of a viral genome, is transcribed within the host cell	0.698558	-1.03228	CDK9, RPSA, RPL31, RPS10, RPS21, RPS19, RPL10, RPL41, RPS8, RPS29, TFAP4, RPS12, RPL21, RPL35A, RPL37A, RPLP2, RPS27A, RPL34, RPS23, CTDP1, POM121C, TARBP2, NELFB, RAE1, JUN, TRIM32, RPS28	RPL39, MON1B, RPL15, GTF2B, NUPL2, TRIM13, NUP35, NUP54, GTF2F2, NUP37, NUP205, RPL36A, NUP88, ZNF639, RPL17-C18orf32, RPL9, RPL17, CCNT1, POLR2A, HMGA2, NUP43, SP1, TRIM21, LEF1, CHD1
GO:0019080	viral gene expression	175	5	0.58	1057	0.00026	1	0.192857	1	A process by which a viral gene is converted into a mature gene product or products (proteins or RNA). This includes viral transcription, processing to produce a mature RNA product, and viral translation	0.698558	-1.03228	CDK9, RPSA, RPL31, RPS10, RPS21, RPS19, RPL10, RPL41, RPS8, RPS29, TFAP4, RPS12, RPL21, PTBP1, RPL35A, RPL37A, RPLP2, RPS27A, RPL34, RPS23, CTDP1, POM121C, TARBP2, NELFB, RAE1, JUN, EIF2AK4, TRIM32, RPS28	RPL39, MON1B, RPL15, GTF2B, NUPL2, TRIM13, NUP35, NUP54, GTF2F2, NUP37, NUP205, RPL36A, NUP88, ZNF639, SSB, RPL17-C18orf32, RPL9, RPL17, CCNT1, POLR2A, HMGA2, NUP43, SP1, TRIM21, LEF1, CHD1
GO:0006413	translational initiation	177	5	0.59	5	0.00027	0.00027	0.192857	0.54	The process preceding formation of the peptide bond between the first two amino acids of a protein. This includes the formation of a complex of the ribosome, mRNA, and an initiation complex that contains the first aminoacyl-tRNA	0.686162	-1.17049	RPSA, RPL31, EIF2B1, RPS10, RPS21, RPS19, RPL10, RPL41, RPS8, RPS29, RPS12, DNAJC3, RPL21, PTBP1, RPL35A, RPL37A, RPLP2, RPS27A, EIF1AX, RPL34, RPS23, EIF2AK4, RPS28	EIF3M, RPL39, EIF3E, PAIP1, RPL15, EIF2AK2, PPP1R15B, EIF2A, NPM1, NCK1, EIF1B, EIF3J, EIF3H, MTIF3, RPL36A, ALKBH1, YAE1D1, SSB, EIF4B, FMR1, EIF4E, RPS6KB1, ABCE1, C8orf88, GLE1, RPL17-C18orf32, RPL9, MTFMT, EIF5, RPL17, EIF4A2, EIF4H, DHX29, PABPC1, EIF5B, PAIP2, EIF2B2
GO:0000956	nuclear-transcribed mRNA catabolic proce...	190	5	0.64	1058	0.00037	1	0.233333	1	The chemical reactions and pathways resulting in the breakdown of nuclear-transcribed mRNAs in eukaryotic cells	0.738539	-1.19018	EXOSC6, RPSA, RPL31, TNRC6B, RPS10, RPS21, RPS19, EDC3, RPL10, DDX6, RPL41, RPS8, RPS29, RPS12, LSM5, RPL21, RPL35A, THRAP3, RPL37A, RPLP2, RPS27A, RPL34, RPS23, XRN1, TNKS1BP1, EXOSC7, RPS28	RPL39, GSPT1, EIF3E, TENT2, PAIP1, DIS3, GSPT2, RPL15, UPF2, TTC37, LSM1, EXOSC3, DDX5, RPL36A, PPP2R2A, SSB, EIF4B, PNRC2, RC3H1, CNOT2, EIF4E, PATL1, CNOT1, RPL17-C18orf32, RPL9, RPL17, EIF4A2, ZFP36L1, EXOSC9, HBS1L, PABPC1, CNOT8, CNOT10, SMG8
GO:0034655	nucleobase-containing compound catabolic...	299	6	1	1059	0.00039	1	0.233333	1	The chemical reactions and pathways resulting in the breakdown of nucleobases, nucleosides, nucleotides and nucleic acids	0.80284	-1.32484	EXOSC6, PNPT1, RPSA, POP1, RPL31, PDE8A, TNRC6B, RPS10, DCTPP1, RPS21, RPS19, EDC3, ZHX2, RPL10, DNA2, DDX6, RPL41, RPS8, RPS29, ITPA, RPS12, LSM5, RPL21, RPL35A, THRAP3, NUDT18, SAMHD1, RPL37A, RNH1, NTHL1, RPLP2, RPS27A, PDE7A, DNASE1L2, RPL34, RPS23, HSF1, DPYD, PDE8B, DNASE1, XRN1, CASP3, TNKS1BP1, H1F0, EXOSC7, RPS28	RPL39, RNASEH2B, MTREX, GSPT1, EIF3E, TENT2, PAIP1, DIS3, GSPT2, RPL15, TATDN1, UPF2, TTC37, LSM1, HNRNPR, EXOSC3, DDX5, RPL36A, PPP2R2A, ZC3HAV1, SSB, EIF4B, FMR1, PNRC2, RC3H1, HPRT1, UNG, CNOT2, SETMAR, EIF4E, PATL1, CNOT1, NT5E, RPL17-C18orf32, SUPV3L1, RPL9, RPL17, ERN1, MBD4, EIF4A2, ZFP36L1, NUDT12, EXOSC9, HBS1L, PABPC1, APOBEC3C, HNRNPD, SMPDL3A, PPP1R8, EGLN1, OGG1, CNOT8, LRPPRC, CNOT1…
GO:0044033	multi-organism metabolic process	193	5	0.65	1060	0.0004	1	0.233333	1	A metabolic process - chemical reactions and pathways, including anabolism and catabolism, by which living organisms transform chemical substances - which involves more than one organism	0.698558	-1.07424	CDK9, RPSA, RPL31, RPS10, RPS21, RPS19, RPL10, RPL41, RPS8, RPS29, MAP2K3, TFAP4, TOP2A, RPS12, RPL21, PTBP1, RPL35A, RPL37A, RPLP2, RPS27A, RPL34, RPS23, CTDP1, POM121C, TARBP2, NELFB, MAP2K1, RAE1, JUN, EIF2AK4, TRIM32, RPS28	RPL39, MAP2K4, MON1B, RPL15, GTF2B, NUPL2, TRIM13, NUP35, NUP54, GTF2F2, NUP37, NUP205, ATG5, RPL36A, NUP88, ZNF639, SSB, FMR1, RPL17-C18orf32, RPL9, RPL17, CCNT1, POLR2A, HMGA2, NUP43, SP1, TRIM21, LEF1, CHD1
GO:0030490	maturation of SSU-rRNA	46	3	0.15	1061	0.00046	1	0.233333	1	Any process involved in the maturation of a precursor Small SubUnit (SSU) ribosomal RNA (rRNA) molecule into a mature SSU-rRNA molecule	0.519776	-0.650387	RPSA, RPS21, RPS19, RPS8, FCF1, RPS28	MPHOSPH10, UTP3, HEATR1, MRPS9, UTP4, NOL11, DCAF13
GO:0042255	ribosome assembly	46	3	0.15	1062	0.00046	1	0.233333	1	The aggregation, arrangement and bonding together of the mature ribosome and of its subunits	0.552769	-0.753921	RPSA, RPS10, RPS19, RPL10, DDX28, NOP53, RPS27L, RPS28	RPF1, BRIX1, EIF2A, NPM1, SBDS, MTERF3, FASTKD2
GO:0043604	amide biosynthetic process	586	8	1.96	269	0.00051	0.10782	0.233333	1	The chemical reactions and pathways resulting in the formation of an amide, any derivative of an oxoacid in which an acidic hydroxy group has been replaced by an amino or substituted amino group	0.878405	-1.33289	CERS2, MEX3D, EEF2K, GTF2H3, RPSA, CYR61, RPL31, MTPN, IGFBP5, DEGS1, EIF2B1, TNRC6B, RPS10, MRPL54, RPS21, RPS19, NAGS, SECISBP2L, DAPK3, GGT7, LARP4, RPL10, UQCC2, PRKAA1, DDX6, GIGYF2, RPL41, RPS8, MRPS21, RPS29, ST3GAL5, RPS12, TGFB1, DNAJC3, RPL21, PTBP1, RPL35A, RPL37A, FOXO3, RPLP2, MTHFD2, RPS27A, ZNF598, SARS2, EIF1AX, SERP1, RPL22L1, RPL34, RPS23, ORMDL3, CHCHD1, NHP2, TNIP1, TARBP2, XR…	EIF3M, MRPS30, RPL39, GSPT1, NFE2L2, EIF3E, PAIP1, GSPT2, AASDH, RPL15, EIF2AK2, MRPL3, MRPL1, PPP1R15B, EIF2A, IARS, FAM129A, EEF1E1, IREB2, NPM1, NCK1, PUM2, ARG2, GCH1, EIF1B, C12orf65, EIF3J, RARS, DARS2, CAPRIN1, EIF3H, WARS2, EGFR, MTIF3, HNRNPR, RMND1, MRPS9, DDX5, RPL36A, TNRC6A, PRKRA, GARS, ALKBH1, MALSU1, YAE1D1, SSB, EIF4B, GGCT, FMR1, RC3H1, SPTSSA, DND1, RGS2, CNOT2, EIF4E, TARS, RP…
GO:0006402	mRNA catabolic process	205	5	0.69	1063	0.00053	1	0.233333	1	The chemical reactions and pathways resulting in the breakdown of mRNA, messenger RNA, which is responsible for carrying the coded genetic 'message', transcribed from DNA, to sites of protein assembly at the ribosomes	0.768752	-1.19018	EXOSC6, PNPT1, RPSA, RPL31, TNRC6B, RPS10, RPS21, RPS19, EDC3, ZHX2, RPL10, DDX6, RPL41, RPS8, RPS29, RPS12, LSM5, RPL21, RPL35A, THRAP3, RPL37A, RNH1, RPLP2, RPS27A, RPL34, RPS23, XRN1, TNKS1BP1, EXOSC7, RPS28	RPL39, GSPT1, EIF3E, TENT2, PAIP1, DIS3, GSPT2, RPL15, UPF2, TTC37, LSM1, HNRNPR, EXOSC3, DDX5, RPL36A, PPP2R2A, ZC3HAV1, SSB, EIF4B, FMR1, PNRC2, RC3H1, CNOT2, EIF4E, PATL1, CNOT1, RPL17-C18orf32, SUPV3L1, RPL9, RPL17, ERN1, EIF4A2, ZFP36L1, EXOSC9, HBS1L, PABPC1, CNOT8, CNOT10, SMG8
GO:0046700	heterocycle catabolic process	317	6	1.06	1064	0.00054	1	0.233333	1	The chemical reactions and pathways resulting in the breakdown of heterocyclic compounds, those with a cyclic molecular structure and at least two different atoms in the ring (or rings)	0.836732	-1.32484	EXOSC6, FTCD, PNPT1, RPSA, POP1, RPL31, PDE8A, TNRC6B, RPS10, DCTPP1, RPS21, TET2, RPS19, EDC3, ZHX2, RPL10, DNA2, DDX6, RPL41, RPS8, RPS29, ITPA, RPS12, LSM5, RPL21, RPL35A, THRAP3, NUDT18, SAMHD1, RPL37A, RNH1, NTHL1, RPLP2, ALDH4A1, RPS27A, PDE7A, DNASE1L2, RPL34, RPS23, HSF1, DPYD, PDE8B, DNASE1, XRN1, CASP3, TNKS1BP1, H1F0, EXOSC7, RPS28	RPL39, RNASEH2B, MTREX, GSPT1, EIF3E, TENT2, PAIP1, DIS3, GSPT2, RPL15, TATDN1, UPF2, HNMT, TTC37, LSM1, HNRNPR, EXOSC3, DDX5, RPL36A, PPP2R2A, ZC3HAV1, SSB, EIF4B, FMR1, PNRC2, RC3H1, HPRT1, UNG, CNOT2, SETMAR, EIF4E, PATL1, CNOT1, NT5E, RPL17-C18orf32, SUPV3L1, RPL9, RPL17, ERN1, MBD4, EIF4A2, ZFP36L1, NUDT12, EXOSC9, HBS1L, PABPC1, APOBEC3C, HNRNPD, SMPDL3A, PPP1R8, EGLN1, OGG1, CNOT8, LRPPRC,…
GO:0044270	cellular nitrogen compound catabolic pro...	318	6	1.06	1065	0.00055	1	0.233333	1	The chemical reactions and pathways resulting in the breakdown of organic and inorganic nitrogenous compounds	0.836732	-1.32484	EXOSC6, FTCD, PNPT1, RPSA, POP1, RPL31, PDE8A, TNRC6B, RPS10, DCTPP1, RPS21, TET2, RPS19, EDC3, ZHX2, RPL10, DNA2, DDX6, RPL41, RPS8, RPS29, TST, ITPA, RPS12, LSM5, RPL21, RPL35A, THRAP3, NUDT18, SAMHD1, RPL37A, RNH1, NTHL1, RPLP2, RPS27A, PDE7A, DNASE1L2, RPL34, RPS23, HSF1, DPYD, PDE8B, DNASE1, XRN1, CASP3, TNKS1BP1, H1F0, EXOSC7, RPS28	RPL39, RNASEH2B, MTREX, GSPT1, EIF3E, TENT2, PAIP1, DIS3, GSPT2, RPL15, TATDN1, UPF2, HNMT, TTC37, LSM1, HNRNPR, EXOSC3, DDX5, RPL36A, PPP2R2A, ZC3HAV1, SSB, EIF4B, FMR1, PNRC2, RC3H1, HPRT1, UNG, CNOT2, SETMAR, EIF4E, PATL1, CNOT1, NT5E, RPL17-C18orf32, SUPV3L1, RPL9, RPL17, ERN1, MBD4, EIF4A2, ZFP36L1, NUDT12, EXOSC9, HBS1L, PABPC1, APOBEC3C, HNRNPD, SMPDL3A, PPP1R8, EGLN1, OGG1, CNOT8, LRPPRC,…
GO:0010629	negative regulation of gene expression	1108	11	3.7	134	0.00056	0.05281	0.233333	1	Any process that decreases the frequency, rate or extent of gene expression. Gene expression is the process in which a gene's coding sequence is converted into a mature gene product or products (proteins or RNA). This includes the production of an RNA transcript as well as any processing to produce a mature RNA product or an mRNA (for protein-coding genes) and the translation of that mRNA into pr…	1.14368	-1.57502	LRP8, ITGB8, KAT6A, KLF12, EXOSC6, SKIL, CNPY2, ATAD2B, MEX3D, H3F3A, KLF16, C1D, FZD8, HES6, PNPT1, ARHGAP35, CDK9, RPSA, HIST1H2AG, TSNAX, ZBTB18, TAF3, UBC, BAHD1, TAF9B, CREBZF, TBX2, GFI1, RPL31, GON4L, IGFBP5, IFI27, STRN3, PPM1F, HMG20A, SUFU, BRCA1, TNRC6B, RPS10, EGR1, SBNO2, AHR, SCMH1, RPS21, CBX6, NDFIP2, RPS19, DDX20, NOTCH1, RTF1, THRA, ATOH8, ZNF703, DAPK3, SMAD4, MDM4, LDLR, TNRC1…	FAM220A, ZNF675, HAT1, UBE2D3, THRB, RPL39, RNASEH2B, GSPT1, EPC1, RNF2, EIF3E, TENT2, PDCD10, WDR35, PAIP1, CREB1, DYRK1A, SIN3A, DIS3, ADNP, BAZ2A, ZBTB1, ZMYND11, GSPT2, RPL15, NFIL3, EIF2AK2, STAT1, ZNF224, IRF2, KDM5A, PTBP3, TMF1, AKIRIN2, GLIS3, ZNF567, EED, BTAF1, TMEM59, ZBTB33, COPS2, NUPL2, IREB2, TRIM13, SMURF2, SUMO1, UBA3, NCK1, IKZF4, RBAK, NUP35, PUM2, MBD2, TSN, NUP54, PRNP, NR2C…
GO:0019439	aromatic compound catabolic process	324	6	1.08	1066	0.0006	1	0.24	1	The chemical reactions and pathways resulting in the breakdown of aromatic compounds, any substance containing an aromatic carbon ring	0.836732	-1.32484	EXOSC6, FTCD, PNPT1, RPSA, POP1, RPL31, PDE8A, TNRC6B, RPS10, DCTPP1, RPS21, RPS19, EDC3, ZHX2, RPL10, DNA2, DDX6, RPL41, RPS8, RPS29, ITPA, RPS12, LSM5, RPL21, RPL35A, THRAP3, NUDT18, SAMHD1, RPL37A, RNH1, NTHL1, RPLP2, RPS27A, PDE7A, DNASE1L2, RPL34, RPS23, HSF1, DPYD, PDE8B, DNASE1, XRN1, CASP3, TNKS1BP1, H1F0, EXOSC7, RPS28	RPL39, RNASEH2B, MTREX, GSPT1, EIF3E, TENT2, PAIP1, DIS3, GSPT2, RPL15, TATDN1, UPF2, HNMT, TTC37, LSM1, HNRNPR, EXOSC3, DDX5, RPL36A, PPP2R2A, ZC3HAV1, SSB, EIF4B, FMR1, PNRC2, RC3H1, HPRT1, UNG, CNOT2, SETMAR, EIF4E, PATL1, CNOT1, NT5E, RPL17-C18orf32, SUPV3L1, RPL9, RPL17, ERN1, MBD4, EIF4A2, ZFP36L1, NUDT12, EXOSC9, HBS1L, PABPC1, APOBEC3C, HNRNPD, SMPDL3A, PPP1R8, EGLN1, PON2, OGG1, CNOT8, L…
GO:1901361	organic cyclic compound catabolic proces...	332	6	1.11	1067	0.00068	1	0.261538	1	The chemical reactions and pathways resulting in the breakdown of organic cyclic compound	0.836732	-1.32484	EXOSC6, FTCD, PNPT1, RPSA, POP1, RPL31, PDE8A, TNRC6B, RPS10, DCTPP1, RPS21, TET2, RPS19, EDC3, ZHX2, RPL10, DNA2, DDX6, RPL41, RPS8, RPS29, ITPA, RPS12, LSM5, RPL21, RPL35A, THRAP3, NUDT18, SAMHD1, RPL37A, RNH1, NTHL1, RPLP2, SNX17, ALDH4A1, RPS27A, PDE7A, DNASE1L2, RPL34, RPS23, HSF1, DPYD, PDE8B, DNASE1, XRN1, CASP3, TNKS1BP1, H1F0, EXOSC7, RPS28	RPL39, RNASEH2B, MTREX, GSPT1, EIF3E, TENT2, PAIP1, DIS3, GSPT2, RPL15, TATDN1, UPF2, YWHAH, HNMT, TTC37, LSM1, HNRNPR, EXOSC3, DDX5, RPL36A, SPP1, HSD17B11, PPP2R2A, ZC3HAV1, SSB, EIF4B, FMR1, PNRC2, RC3H1, HPRT1, UNG, CNOT2, SETMAR, EIF4E, PATL1, CNOT1, NT5E, RPL17-C18orf32, SUPV3L1, RPL9, RPL17, ERN1, MBD4, EIF4A2, ZFP36L1, NUDT12, EXOSC9, HBS1L, PABPC1, APOBEC3C, HNRNPD, SMPDL3A, PPP1R8, EGLN…
GO:0006401	RNA catabolic process	226	5	0.76	1068	0.00082	1	0.303571	1	The chemical reactions and pathways resulting in the breakdown of RNA, ribonucleic acid, one of the two main type of nucleic acid, consisting of a long, unbranched macromolecule formed from ribonucleotides joined in 3',5'-phosphodiester linkage	0.789055	-1.32484	EXOSC6, PNPT1, RPSA, POP1, RPL31, TNRC6B, RPS10, RPS21, RPS19, EDC3, ZHX2, RPL10, DNA2, DDX6, RPL41, RPS8, RPS29, RPS12, LSM5, RPL21, RPL35A, THRAP3, RPL37A, RNH1, RPLP2, RPS27A, RPL34, RPS23, XRN1, TNKS1BP1, EXOSC7, RPS28	RPL39, RNASEH2B, MTREX, GSPT1, EIF3E, TENT2, PAIP1, DIS3, GSPT2, RPL15, UPF2, TTC37, LSM1, HNRNPR, EXOSC3, DDX5, RPL36A, PPP2R2A, ZC3HAV1, SSB, EIF4B, FMR1, PNRC2, RC3H1, CNOT2, EIF4E, PATL1, CNOT1, RPL17-C18orf32, SUPV3L1, RPL9, RPL17, ERN1, EIF4A2, ZFP36L1, EXOSC9, HBS1L, PABPC1, HNRNPD, PPP1R8, CNOT8, LRPPRC, CNOT10, SMG8
GO:0019058	viral life cycle	346	6	1.16	654	0.00085	0.40694	0.303571	1	A set of processes which all viruses follow to ensure survival; includes attachment and entry of the virus particle, decoding of genome information, translation of viral mRNA by host ribosomes, genome replication, and assembly and release of viral particles containing the genome	0.820284	-1.27004	PKN2, CCNK, CDK9, RPSA, UBC, RPL31, RPS10, RPS21, RPS19, NOTCH1, TAP2, LDLR, TRIM5, RPL10, TAP1, DDX6, RPL41, RPS8, RPS29, P4HB, TFAP4, TOP2A, RPS12, SIVA1, ISG15, RPL21, PTBP1, RPL35A, RPL37A, MAVS, RPLP2, RPS27A, CHMP7, CHMP1A, RPL34, RPS23, CTDP1, POM121C, BANF1, TNIP1, HYAL2, TARBP2, NELFB, RAE1, JUN, PC, EIF2AK4, TRIM32, RPS28	ITGB1, XPR1, RPL39, MON1B, RPL15, EIF2AK2, GTF2B, VPS37A, SNX3, NUPL2, TRIM13, VTA1, NUP35, NUP54, GTF2F2, CHMP2B, WWP1, KPNA3, OAS3, AC068234.1, FAM111A, NUP37, NUP205, IFIT5, VAPA, DDX5, ATG5, RPL36A, SRPK1, RAB1A, NUP88, ZC3HAV1, ZNF639, SSB, DERL1, FMR1, YTHDC2, PDCD6IP, HACD3, CHMP3, RPL17-C18orf32, KPNA4, RPL9, THOC2, RPL17, AXL, HSPA8, PPID, PABPC1, CCNT1, UBP1, APOBEC3C, POLR2A, PPIA, HMG…
GO:0006364	rRNA processing	234	5	0.78	299	0.00096	0.12342	0.331034	1	Any process involved in the conversion of a primary ribosomal RNA (rRNA) transcript into one or more mature rRNA molecules	0.867013	-1.19386	NSUN5P2, EXOSC6, C1D, RPSA, RPL31, RPS10, RPS21, NSUN5P1, RPS19, DHX37, RPL10, RPL41, RPS8, RPS29, RPS12, NPM3, NSUN5, RPL21, RPL35A, RRNAD1, RPL37A, FCF1, RPLP2, RPS27A, UTP11, RPL34, RPS23, NHP2, BOP1, DDX49, EXOSC7, RPS28	RPL39, MTREX, RPF1, MPHOSPH10, DIS3, UTP3, RPL15, WDR75, MRPL1, DDX21, NOP58, SBDS, HEATR1, RRP15, EXOSC3, THUMPD1, MRPS9, RPL36A, TRMT61B, BMT2, MAK16, UTP4, NOL11, UTP15, FRG1, RPL17-C18orf32, RPL9, RPL17, IMP4, LTV1, EXOSC9, PNO1, MPHOSPH6, DCAF13, RPP38
GO:0006412	translation	526	7	1.76	501	0.00142	0.26101	0.473333	1	The cellular metabolic process in which a protein is formed, using the sequence of a mature mRNA molecule to specify the sequence of amino acids in a polypeptide chain. Translation is mediated by the ribosome, and begins with the formation of a ternary complex between aminoacylated initiator methionine tRNA, GTP, and initiation factor 2, which subsequently associates with the small subunit of the…	0.828242	-1.30229	MEX3D, EEF2K, GTF2H3, RPSA, RPL31, MTPN, IGFBP5, EIF2B1, TNRC6B, RPS10, MRPL54, RPS21, RPS19, SECISBP2L, DAPK3, LARP4, RPL10, UQCC2, DDX6, GIGYF2, RPL41, RPS8, MRPS21, RPS29, RPS12, TGFB1, DNAJC3, RPL21, PTBP1, RPL35A, RPL37A, FOXO3, RPLP2, RPS27A, ZNF598, SARS2, EIF1AX, SERP1, RPL22L1, RPL34, RPS23, CHCHD1, NHP2, TNIP1, TARBP2, XRN1, PTRH1, MAP2K1, ABTB1, MRPL23, EIF2AK4, RPS27L, AURKAIP1, MRPL4…	EIF3M, MRPS30, RPL39, GSPT1, EIF3E, PAIP1, GSPT2, RPL15, EIF2AK2, MRPL3, MRPL1, PPP1R15B, EIF2A, IARS, FAM129A, EEF1E1, IREB2, NPM1, NCK1, PUM2, EIF1B, C12orf65, EIF3J, RARS, DARS2, CAPRIN1, EIF3H, WARS2, EGFR, MTIF3, HNRNPR, RMND1, MRPS9, DDX5, RPL36A, TNRC6A, PRKRA, GARS, ALKBH1, MALSU1, YAE1D1, SSB, EIF4B, FMR1, RC3H1, DND1, RGS2, CNOT2, EIF4E, TARS, RPS6KB1, ABCE1, AC079447.1, MRPS27, MRPL39,…
GO:0016072	rRNA metabolic process	262	5	0.88	340	0.0016	0.15224	0.516129	1	The chemical reactions and pathways involving rRNA, ribosomal RNA, a structural constituent of ribosomes	0.867013	-1.19386	NSUN5P2, EXOSC6, C1D, RPSA, RPL31, RPS10, RPS21, NSUN5P1, RPS19, DHX37, RNASEK, RPL10, RPL41, RPS8, RPS29, BRF1, RPS12, NPM3, NSUN5, RPL21, RPL35A, RRNAD1, RPL37A, FCF1, RPLP2, RPS27A, UTP11, RPL34, RPS23, NHP2, BOP1, GTF3C1, CD3EAP, XRN1, DDX49, EXOSC7, RPS28	RPL39, MTREX, RPF1, MPHOSPH10, DIS3, UTP3, RPL15, WDR75, MRPL1, DDX21, NOP58, SBDS, NIFK, HEATR1, RRP15, EXOSC3, THUMPD1, MRPS9, RPL36A, TRMT61B, BMT2, MAK16, UTP4, NOL11, UTP15, FRG1, RPL17-C18orf32, RPL9, RPL17, IMP4, LTV1, EXOSC9, PNO1, MPHOSPH6, DCAF13, RPP38
GO:0043043	peptide biosynthetic process	540	7	1.8	528	0.00166	0.27597	0.51875	1	The chemical reactions and pathways resulting in the formation of peptides, compounds of 2 or more (but usually less than 100) amino acids where the alpha carboxyl group of one is bound to the alpha amino group of another. This may include the translation of a precursor protein and its subsequent processing into a functional peptide	0.828242	-1.33289	MEX3D, EEF2K, GTF2H3, RPSA, RPL31, MTPN, IGFBP5, EIF2B1, TNRC6B, RPS10, MRPL54, RPS21, RPS19, SECISBP2L, DAPK3, GGT7, LARP4, RPL10, UQCC2, DDX6, GIGYF2, RPL41, RPS8, MRPS21, RPS29, RPS12, TGFB1, DNAJC3, RPL21, PTBP1, RPL35A, RPL37A, FOXO3, RPLP2, RPS27A, ZNF598, SARS2, EIF1AX, SERP1, RPL22L1, RPL34, RPS23, CHCHD1, NHP2, TNIP1, TARBP2, XRN1, PTRH1, MAP2K1, CHAC1, ABTB1, GCLM, MRPL23, EIF2AK4, RPS2…	EIF3M, MRPS30, RPL39, GSPT1, NFE2L2, EIF3E, PAIP1, GSPT2, AASDH, RPL15, EIF2AK2, MRPL3, MRPL1, PPP1R15B, EIF2A, IARS, FAM129A, EEF1E1, IREB2, NPM1, NCK1, PUM2, EIF1B, C12orf65, EIF3J, RARS, DARS2, CAPRIN1, EIF3H, WARS2, EGFR, MTIF3, HNRNPR, RMND1, MRPS9, DDX5, RPL36A, TNRC6A, PRKRA, GARS, ALKBH1, MALSU1, YAE1D1, SSB, EIF4B, GGCT, FMR1, RC3H1, DND1, RGS2, CNOT2, EIF4E, TARS, RPS6KB1, ABCE1, AC0794…
GO:0043603	cellular amide metabolic process	705	8	2.36	400	0.00172	0.18695	0.521212	1	The chemical reactions and pathways involving an amide, any derivative of an oxoacid in which an acidic hydroxy group has been replaced by an amino or substituted amino group, as carried out by individual cells	0.988471	-1.3597	ITGB8, CERS2, FTCD, MEX3D, EEF2K, GTF2H3, SLC25A32, RPSA, MTHFR, CYR61, RPL31, MTPN, IGFBP5, DEGS1, EIF2B1, TNRC6B, RPS10, MRPL54, RPS21, SLC19A1, RPS19, NAGS, SECISBP2L, DAPK3, GGT7, LARP4, RPL10, UQCC2, PRKAA1, LNPEP, SLC46A1, DDX6, GIGYF2, RPL41, RPS8, MRPS21, RPS29, ST3GAL5, RPS12, TGFB1, DNAJC3, RPL21, PTBP1, RPL35A, RPL37A, FOXO3, BTD, RPLP2, MTHFD2, STAT5B, RPS27A, ZNF598, SARS2, EIF1AX, S…	EIF3M, MRPS30, RPL39, GSPT1, CPD, NFE2L2, EIF3E, PAIP1, CPE, GSPT2, HSP90AA1, AASDH, RPL15, EIF2AK2, CPA3, MRPL3, MRPL1, PPP1R15B, EIF2A, NPEPPS, IARS, FAM129A, EEF1E1, IREB2, NPM1, NCK1, PUM2, ARG2, GCH1, EIF1B, C12orf65, EIF3J, RARS, ATP6AP2, DARS2, CAPRIN1, EIF3H, ALDH5A1, WARS2, EGFR, MTIF3, HNRNPR, RMND1, MCCC2, MRPS9, DDX5, RPL36A, TNRC6A, PRKRA, GARS, ALKBH1, PROS1, LAMP2, MALSU1, YAE1D1, …
GO:0060986	endocrine hormone secretion	20	2	0.07	1069	0.00198	1	0.574286	1	The regulated release of a hormone into the circulatory system	0.450328	-0.579076	KISS1, RAB11FIP5, SMAD4, FAM129B, RAB8B, TBX3	LINC02210-CRHR1, TMF1, NKX3-1, AGTR1, IL1B
GO:0031145	anaphase-promoting complex-dependent cat...	76	3	0.25	6	0.00201	0.00201	0.574286	1	The chemical reactions and pathways resulting in the breakdown of a protein or peptide by hydrolysis of its peptide bonds, initiated by the covalent attachment of ubiquitin, with ubiquitin-protein ligation catalyzed by the anaphase-promoting complex, and mediated by the proteasome	0.735663	-0.942602	PSMA6, SKP2, ANAPC7, UBC, ANAPC2, ANAPC11, FBXO31, PSMB10, RPS27A, CDK1, PSMA7	PSMD5, PSMD12, PSMA1, ANAPC10, PSMC6, CDC23, PSMA4, PSMD14, CDC27, PSMD6, UBE2E1, PSMD7
GO:0042254	ribosome biogenesis	284	5	0.95	741	0.00228	0.51081	0.627027	1	A cellular process that results in the biosynthesis of constituent macromolecules, assembly, and arrangement of constituent parts of ribosome subunits; includes transport to the sites of protein synthesis	0.874758	-1.21883	NSUN5P2, EXOSC6, C1D, RPSA, RPL31, RPS10, ZNF593, RPS21, NSUN5P1, RPS19, DHX37, RPL10, RPL41, RPS8, RPS29, RPS12, DDX28, NPM3, NSUN5, RPL21, RPL35A, NOP53, RRNAD1, RPL37A, FCF1, RPLP2, URB2, RPS27A, UTP11, RPL34, RPS23, NHP2, BOP1, RPS27L, AAMP, DDX49, EXOSC7, RPS28	RPL39, MTREX, RPF1, BRIX1, MPHOSPH10, DIS3, UTP3, RPL15, WDR75, MRPL1, EIF2A, DDX21, NPM1, NOP58, SBDS, HEATR1, RRP15, MTERF3, EXOSC3, THUMPD1, MRPS9, RPL36A, SDAD1, TRMT61B, NUP88, MALSU1, YAE1D1, BMT2, MAK16, UTP4, NOL11, UTP15, ABCE1, FRG1, RPL17-C18orf32, RPL9, RPL17, IMP4, LTV1, ZNHIT6, EXOSC9, FASTKD2, RIOX2, PNO1, MPHOSPH6, DCAF13, GNL3L, RPP38
GO:0009057	macromolecule catabolic process	918	9	3.07	967	0.00232	0.85009	0.627027	1	The chemical reactions and pathways resulting in the breakdown of a macromolecule, any molecule of high relative molecular mass, the structure of which essentially comprises the multiple repetition of units derived, actually or conceptually, from molecules of low relative molecular mass	1.04248	-1.53982	PSMA6, SKP2, EGLN2, EXOSC6, RNF6, KIF14, GPC2, PPP1R3D, PNPT1, RPSA, ANAPC7, UBC, POP1, ADAM9, RPL31, SOCS4, SUFU, TNRC6B, RPS10, PTPN3, UBXN2A, RPS21, RNF166, RPS19, PYGB, UFL1, ANAPC2, CBL, MDM4, LDLR, POMT2, FBXL19, EDC3, ZHX2, RPL10, UQCC2, DNA2, ANAPC11, LNPEP, DDX6, RPL41, RPS8, RPS29, TRPC4AP, RNF11, RPS12, FBXO31, EDEM1, GSK3B, CTSV, ISG15, CSPG4, TGFB1, DNAJC3, CCDC22, LSM5, USP3, PSMB10…	PSMD5, UBE2D3, PPT1, OMA1, RPL39, LYPLA1, RNASEH2B, MTREX, GSPT1, UCHL5, NFE2L2, EIF3E, PSMD12, USP25, TENT2, USP38, PAIP1, AZIN1, HPSE, DIS3, GSPT2, FMN2, HSP90AA1, RPL15, BNIP3L, TMTC3, USP14, UBE2N, TMF1, TATDN1, VPS37A, RFFL, HMMR, VPS36, PSMA1, USP9Y, ANAPC10, LUM, SNX3, ZMPSTE24, TRIM13, SMURF2, SUMO1, LYPLAL1, TAF9, PSMC6, TOPORS, CRBN, WWP1, CDC23, PPP2R5C, UBE3A, UPF2, PSMA4, CALM2, OPHN…
GO:0071156	regulation of cell cycle arrest	86	3	0.29	7	0.00286	0.00286	0.630189	1	Any process that modulates the rate, frequency, or extent of cell cycle arrest, the process in which the cell cycle is halted during one of the normal phases	0.761039	-0.643488	CCNK, PIDD1, CDK9, UBC, BIN1, BRCA1, HMGN5, MDM4, FOXM1, MUC1, CDK5R1, TFAP4, TGFB1, RBL2, CHEK2, RPS27A, CDK1, FOXO4, TNKS1BP1	PCNA, NPM1, CASP2, CNOT2, SETMAR, TRIAP1, CNOT1, ID2, HMGA2, PKD2, CNOT8, CNOT10
GO:0044265	cellular macromolecule catabolic process	767	8	2.56	1070	0.00293	1	0.630189	1	The chemical reactions and pathways resulting in the breakdown of a macromolecule, any large molecule including proteins, nucleic acids and carbohydrates, as carried out by individual cells	0.981921	-1.52393	PSMA6, SKP2, EXOSC6, RNF6, KIF14, PNPT1, RPSA, ANAPC7, UBC, POP1, RPL31, SOCS4, SUFU, TNRC6B, RPS10, UBXN2A, RPS21, RNF166, RPS19, UFL1, ANAPC2, CBL, POMT2, FBXL19, EDC3, ZHX2, RPL10, UQCC2, DNA2, ANAPC11, DDX6, RPL41, RPS8, RPS29, TRPC4AP, RNF11, RPS12, FBXO31, EDEM1, GSK3B, CTSV, ISG15, DNAJC3, CCDC22, LSM5, USP3, PSMB10, RPL21, RPL35A, THRAP3, UBR2, RPL37A, RNH1, ZSWIM9, BAP1, CHEK2, RPLP2, RA…	PSMD5, UBE2D3, PPT1, OMA1, RPL39, RNASEH2B, MTREX, GSPT1, UCHL5, NFE2L2, EIF3E, PSMD12, USP25, TENT2, USP38, PAIP1, HPSE, DIS3, GSPT2, RPL15, BNIP3L, TMTC3, USP14, UBE2N, TMF1, TATDN1, VPS37A, RFFL, VPS36, PSMA1, USP9Y, ANAPC10, ZMPSTE24, TRIM13, SMURF2, SUMO1, TAF9, PSMC6, TOPORS, CRBN, WWP1, CDC23, PPP2R5C, UBE3A, UPF2, PSMA4, OPHN1, SDCBP, BBS7, TTC37, UBE2A, FBXW7, KLHL20, NGLY1, LSM1, HNRNPR…
GO:0007219	Notch signaling pathway	87	3	0.29	8	0.00296	0.00296	0.630189	1	A series of molecular signals initiated by the binding of an extracellular ligand to the receptor Notch on the surface of a target cell, and ending with regulation of a downstream cellular process, e.g. transcription	0.710369	-0.815722	POFUT1, UBC, TBX2, NEURL1B, RPS19, DTX4, NOTCH1, MAML2, FAM129B, GATA2, GDPD5, TGFB1, DNER, HHEX, RPS27A, POGLUT1, CHAC1, GSX2	NOV, PDCD10, IFT74, FBXW7, NEPRO, SYNJ2BP, NOTCH2, ADAM10, KAT2B, RBPJ, NCSTN, SPEN, ZMIZ1
GO:0044248	cellular catabolic process	1354	11	4.53	933	0.00303	0.78615	0.630189	1	The chemical reactions and pathways resulting in the breakdown of substances, carried out by individual cells	1.11223	-1.52393	ACAD11, PSMA6, SKP2, EXOSC6, RNF6, FTCD, KIF14, VPS13C, SNAP29, PIK3C2B, PPP1R3D, PNPT1, RPSA, ACBD5, ANAPC7, UBC, POP1, ADAM9, RPL31, LAMTOR4, SLC27A4, SOCS4, PDE8A, SUFU, TNRC6B, RPS10, DCTPP1, PTPN3, UBXN2A, RPS21, TBC1D14, TET2, RNF166, RPS19, PYGB, UFL1, TOMM5, TSPO, ANAPC2, DAPK3, CBL, LDLR, POMT2, GGT7, TRIM5, FBXL19, IKBKG, EDC3, HTT, ZHX2, RPL10, UQCC2, TAB3, DNA2, PRKAA1, SPHK1, ANAPC11…	PSMD5, UBE2D3, PPT1, OMA1, RPL39, RNASEH2B, MTREX, GSPT1, UCHL5, NFE2L2, EIF3E, PSMD12, USP25, TENT2, USP38, PAIP1, HPSE, GPD2, DIS3, GSPT2, HSP90AA1, RPL15, BNIP3L, DNM1L, TMTC3, USP14, UBE2N, TMF1, TATDN1, VPS37A, RFFL, SNX14, CSNK2A2, TMEM59, VPS36, DRAM2, PSMA1, USP9Y, ANAPC10, WDR75, LUM, TOMM20, ZMPSTE24, NPEPPS, TRIM13, SMURF2, SUMO1, VTA1, TAF9, PSMC6, ABCD3, FUNDC1, CHMP2B, TOPORS, CRBN,…
GO:0090150	establishment of protein localization to...	308	5	1.03	1071	0.00324	1	0.630189	1	The directed movement of a protein to a specific location in a membrane	0.800422	-1.36312	FAM126A, RPSA, RPL31, RAB26, RPS10, RPS21, RPS19, SCRIB, RPL10, RAB8B, CDK5R1, RPL41, RPS8, RPS29, EFR3A, RPS12, CDH1, CDH2, TOMM7, RPL21, RPL35A, MIEF1, MPP5, RPL37A, PPP2R5A, PPP3R1, RPLP2, MIEF2, ARHGAP44, ATG4B, RPS27A, EZR, PACS2, RER1, RPL34, RDX, PKDCC, RPS23, CNST, TSPAN15, BCL2L1, KIF13A, PEX5, ARF6, UBL4A, ARFRP1, VAMP5, RAB3GAP1, RPS28, CSK	ITGB1, SRP19, RPL39, LYPLA1, PIK3R1, RHOQ, HSP90AA1, RPL15, YWHAZ, REEP1, TMEM59, PEX3, RAB11A, NUP54, PRNP, GOLPH3L, BLZF1, YWHAH, CALM2, SDCBP, VAMP3, GOLGA7, EGFR, MFF, RPL36A, MAPK8, SRP72, RAB10, SRP54, SRP14, HSPA4, RPL17-C18orf32, SRP9, ATG4A, RPL9, RPL17, MTCL1, C2CD5, RAB8A, PLS1, PKP2, TRAM1, CLASP2, ACSL3, TIMM9, SSR1, STOM, RAB31, DYNLL2, FYN, CLIP1
GO:0007050	cell cycle arrest	188	4	0.63	512	0.00334	0.26805	0.630189	1	A regulatory process that halts progression through the cell cycle during one of the normal phases (G1, S, G2, M)	0.849032	-0.950255	SKIL, CCNK, PNPT1, PIDD1, CDK9, UBC, LAMTOR4, BIN1, BRCA1, HMGN5, MDM4, PRKAA1, FOXM1, MUC1, CDK5R1, RASSF1, TFAP4, TGFB1, RBL2, CHEK2, HRAS, ING4, RPS27A, CDK1, RHEB, MAPK12, ZFHX3, KIF20B, APBB1, FOXO4, MAP2K1, CAB39, EIF2AK4, TBRG4, TNKS1BP1, WNT10B, TGFBR1	MTBP, PCNA, DDIAS, MSH2, NPM1, PRNP, PRKAB2, NKX3-1, MAP3K20, RRAGB, LAMTOR3, NOTCH2, CASP2, CNOT2, SETMAR, TRIAP1, CDK6, CNOT1, KAT2B, STRADB, CUL2, ID2, ERN1, CDKN2B, CUL5, HMGA2, PKD2, TGFB2, CNOT8, CNOT10, CDKN3
GO:0002041	intussusceptive angiogenesis	1	1	0	9	0.00334	0.00334	0.630189	1	The formation of new blood vessels as a result of the insertion and extension of lumenal tissue pillars	0.792564	0.792564	CYR61
GO:0006253	dCTP catabolic process	1	1	0	10	0.00334	0.00334	0.630189	1	The chemical reactions and pathways resulting in the breakdown of dCTP, deoxycytidine triphosphate	0.708568	0.708568	DCTPP1
GO:0009149	pyrimidine nucleoside triphosphate catab...	1	1	0	1072	0.00334	1	0.630189	1	The chemical reactions and pathways resulting in the breakdown of pyrimidine nucleoside triphosphate, a compound consisting of a pyrimidine base linked to a ribose or deoxyribose sugar esterified with triphosphate on the sugar	0.708568	0.708568	DCTPP1
GO:0009213	pyrimidine deoxyribonucleoside triphosph...	1	1	0	1073	0.00334	1	0.630189	1	The chemical reactions and pathways resulting in the breakdown of pyrimidine deoxyribonucleoside triphosphate, a compound consisting of a pyrimidine base linked to a deoxyribose sugar esterified with triphosphate on the sugar	0.708568	0.708568	DCTPP1
GO:0034337	RNA folding	1	1	0	11	0.00334	0.00334	0.630189	1	The process of assisting in the covalent and noncovalent assembly of single or multimeric RNAs into the correct tertiary structure	0.612157	0.612157	FAM129B
GO:0044028	DNA hypomethylation	1	1	0	1074	0.00334	1	0.630189	1	An decrease in the epigenetic methylation of cytosine and adenosine residues in DNA	0.612157	0.612157	FAM129B
GO:0044029	hypomethylation of CpG island	1	1	0	12	0.00334	0.00334	0.630189	1	An decrease in the epigenetic methylation of cytosine and adenosine residues in a CpG island in DNA. CpG islands are genomic regions that contain a high frequency of the CG dinucleotide and are often associated with the transcription start site of genes	0.612157	0.612157	FAM129B
GO:0046065	dCTP metabolic process	1	1	0	1075	0.00334	1	0.630189	1	The chemical reactions and pathways involving dCTP, deoxycytidine triphosphate	0.708568	0.708568	DCTPP1
GO:0060112	generation of ovulation cycle rhythm	1	1	0	13	0.00334	0.00334	0.630189	1	The process which controls the timing of the type of sexual cycle seen in female mammals	0.686955	0.686955	KISS1
GO:0060265	positive regulation of respiratory burst...	1	1	0	14	0.00334	0.00334	0.630189	1	Any process that increases the rate, frequency or extent of a phase of elevated metabolic activity, during which oxygen consumption increases made as a defense response ; this leads to the production, by an NADH dependent system, of hydrogen peroxide (H2O2), superoxide anions and hydroxyl radicals	0.682527	0.682527	RPS19
GO:0006518	peptide metabolic process	616	7	2.06	612	0.00351	0.35673	0.65	1	The chemical reactions and pathways involving peptides, compounds of two or more amino acids where the alpha carboxyl group of one is bound to the alpha amino group of another	0.828242	-1.3597	MEX3D, EEF2K, GTF2H3, RPSA, RPL31, MTPN, IGFBP5, EIF2B1, TNRC6B, RPS10, MRPL54, RPS21, RPS19, SECISBP2L, DAPK3, GGT7, LARP4, RPL10, UQCC2, LNPEP, DDX6, GIGYF2, RPL41, RPS8, MRPS21, RPS29, RPS12, TGFB1, DNAJC3, RPL21, PTBP1, RPL35A, RPL37A, FOXO3, RPLP2, RPS27A, ZNF598, SARS2, EIF1AX, SERP1, RPL22L1, RPL34, RPS23, CHCHD1, NHP2, TNIP1, TARBP2, XRN1, PTRH1, MAP2K1, CHAC1, ABTB1, GCLM, MRPL23, EIF2AK…	EIF3M, MRPS30, RPL39, GSPT1, CPD, NFE2L2, EIF3E, PAIP1, CPE, GSPT2, HSP90AA1, AASDH, RPL15, EIF2AK2, CPA3, MRPL3, MRPL1, PPP1R15B, EIF2A, NPEPPS, IARS, FAM129A, EEF1E1, IREB2, NPM1, NCK1, PUM2, EIF1B, C12orf65, EIF3J, RARS, ATP6AP2, DARS2, CAPRIN1, EIF3H, ALDH5A1, WARS2, EGFR, MTIF3, HNRNPR, RMND1, MRPS9, DDX5, RPL36A, TNRC6A, PRKRA, GARS, ALKBH1, PROS1, LAMP2, MALSU1, YAE1D1, SSB, EIF4B, GGCT, F…
GO:0010605	negative regulation of macromolecule met...	1605	12	5.36	274	0.00368	0.11196	0.669091	1	Any process that decreases the frequency, rate or extent of the chemical reactions and pathways involving macromolecules, any molecule of high relative molecular mass, the structure of which essentially comprises the multiple repetition of units derived, actually or conceptually, from molecules of low relative molecular mass	1.17043	-1.71432	LRP8, ITGB8, PSMA6, KAT6A, KLF12, EXOSC6, SKIL, CNPY2, ATAD2B, SOCS7, MEX3D, H3F3A, SH3RF1, NPAT, KLF16, TOB2, C1D, FZD8, PRKAR2B, CDYL, HES6, PNPT1, ARHGAP35, PBLD, CDK9, RPSA, HIST1H2AG, TSNAX, PRKAR1B, ZBTB18, ANAPC7, TAF3, UBC, BAHD1, TAF9B, CREBZF, PREX1, TBX2, GFI1, RPL31, WFDC3, BIRC6, GON4L, IGFBP5, RASSF2, PRKCE, IFI27, STRN3, SOCS4, PPM1F, HMG20A, SUFU, BRCA1, TNRC6B, RPS10, PPP1R1C, CC…	POT1, FAM220A, PSMD5, ZNF675, HAT1, UBE2D3, THRB, TERF2IP, RPL39, RNASEH2B, GSPT1, EPC1, RNF2, UCHL5, EIF3E, PSMD12, USP25, TENT2, PDCD10, WDR35, PAIP1, CREB1, AZIN1, DYRK1A, SIN3A, DIS3, ADNP, BAZ2A, ITM2B, ZBTB1, ZMYND11, GSPT2, FMN2, RPL15, NFIL3, EIF2AK2, STAT1, ZNF224, USP14, IRF2, KDM5A, PTBP3, TMF1, LYN, AKIRIN2, GLIS3, ZNF567, EED, RFFL, BTAF1, TMEM59, CAMK2N1, PSMA1, ZBTB33, ANAPC10, COP…
GO:0015980	energy derivation by oxidation of organi...	197	4	0.66	217	0.00394	0.08431	0.703571	1	The chemical reactions and pathways by which a cell derives energy from organic compounds; results in the oxidation of the compounds from which energy is released	0.805819	-0.885339	PPP1R3D, D2HGDH, PNPT1, NDUFA11, UQCRHL, UBC, NDUFA2, PYGB, NDUFB2, MECP2, STK40, NDUFA9, GSK3B, UQCRQ, NDUFB6, COX10, STBD1, RPS27A, CDK1, HIF1A, OGDH, TBRG4, TAZ, IRS1, C1QTNF2, SURF1, IMMP2L	UGP2, UQCRB, FASTKD3, NDUFS1, CALM2, AP003108.2, ALDH5A1, IDH3A, PMPCB, NDUFA12, GFPT1, PPP1R3E, NNT, GYG1, PDHB, ETFDH, NOA1, SLC25A13, NDUFB1, FASTKD2, PPP1CC, COX20, PANK2, SDHD, NDUFA6, PGM2, PYGL, DLD
GO:0048519	negative regulation of biological proces...	2853	17	9.54	413	0.00414	0.19233	0.726316	1	Any process that stops, prevents, or reduces the frequency, rate or extent of a biological process. Biological processes are regulated by many means; examples include the control of gene expression, protein modification or interaction with a protein or substrate molecule	1.25262	-1.79969	ADAMTS1, LRP8, ITGB8, PSMA6, KAT6A, FGFR3, CERS2, KLF12, EXOSC6, SKIL, RNF6, CNPY2, ATAD2B, KIF14, VPS13C, TIE1, SOCS7, MEX3D, CCNK, EEF2K, SSTR1, H3F3A, TAX1BP3, SH3RF1, VILL, NPAT, KLF16, TOB2, C1D, FZD8, PRKAR2B, CDYL, SOD2, HES6, PNPT1, ARHGAP35, PIDD1, MAK, PBLD, CDK9, RPSA, HIST1H2AG, SH3RF2, TSNAX, PRKAR1B, ZBTB18, ANAPC7, TAF3, UBC, BAHD1, TAF9B, MC1R, WDR81, CREBZF, PREX1, TBX2, GFI1, CY…	POT1, ITGB1, FAM220A, PSMD5, ZNF675, HAT1, UBE2D3, PPT1, OMA1, ARRDC3, THRB, TERF2IP, MTBP, DVL3, RPL39, LYPLA1, RNASEH2B, GSPT1, EPC1, LINC02210-CRHR1, NOV, RNF2, UCHL5, NFE2L2, HIGD1A, EIF3E, NRK, PSMD12, USP25, TENT2, PDCD10, SNX13, WDR35, PAIP1, LRRC17, GDF11, CREB1, PIK3R1, AZIN1, RHOQ, MARCH7, MPHOSPH10, DYRK1A, SIN3A, DIS3, ADNP, BAZ2A, PTPN12, MAP2K4, ITM2B, PFN2, GPAM, ZBTB1, ZMYND11, GS…
GO:0050886	endocrine process	31	2	0.1	1076	0.00473	1	0.815517	1	The process that involves the secretion of or response to endocrine hormones. An endocrine hormone is a hormone released into the circulatory system	0.533879	-0.796931	KISS1, RAB11FIP5, SMAD4, KRAS, FAM129B, RAB8B, TBX3	LINC02210-CRHR1, CPA3, TMF1, ATP6AP2, NKX3-1, AGTR1, OXTR, IL1B, CTSZ, MME
GO:0043408	regulation of MAPK cascade	349	5	1.17	16	0.00552	0.00552	0.866234	1	Any process that modulates the frequency, rate or extent of signal transduction mediated by the MAP kinase (MAPK) cascade	0.903392	-1.30096	CARD9, FGFR3, SH3RF1, FZD8, TIAM1, UBC, CYR61, ADAM9, RASSF2, PRKCE, PDE8A, MADD, AKAP13, KISS1, KITLG, SMAD4, TRIM5, KRAS, IKBKG, MAGED1, TAB3, PRKAA1, SEMA7A, FOXM1, STK40, MAP2K3, S1PR2, C5AR1, FLCN, CDH2, CSPG4, TGFB1, RAPGEF1, DUSP10, CRKL, HRAS, PTPRJ, EFNA1, RPS27A, EZR, APIP, CDK1, HMGCR, IRAK2, PDGFRB, NENF, TIMP3, ATF3, DUSP8, PSAP, MAP3K15, TNIP1, ERP29, HYAL2, MAP2K1, DBNL, JUN, PTPN1…	ZNF675, DVL3, PDGFD, NRK, PDCD10, GDF11, MAP2K4, ZMYND11, EIF2AK2, VRK2, UBE2N, LYN, PDGFRA, HSPH1, ATP6AP2, TAB2, ARL6IP5, SDCBP, DNAJC27, AIDA, MAP3K20, DNAJA1, FBXW7, EGFR, RAP1B, MBIP, HIPK3, IQGAP3, LAMTOR3, GPS2, MAP3K21, IQGAP1, SYNJ2BP, STK3, PIK3CB, RGS2, RAPGEF2, HACD3, SHC1, C5, TAOK3, RYK, SPRY2, IL1B, ERN1, NPTN, WNT5A, BMP4, PHLPP1, RIPK2, SPAG9, NF1, TGFB2, ERCC6, MAP3K7
GO:0034470	ncRNA processing	351	5	1.17	489	0.00565	0.2503	0.866234	1	Any process that results in the conversion of one or more primary non-coding RNA (ncRNA) transcripts into one or more mature ncRNA molecules	0.938097	-1.24774	NSUN5P2, EXOSC6, OSGEP, TRUB1, C1D, RPSA, POP1, RPL31, RPS10, RPS21, NSUN5P1, RPS19, LAGE3, DHX37, RPL10, RPL41, RPS8, RPS29, CTU1, RPS12, NPM3, NSUN5, RPL21, RPL35A, RRNAD1, RPL37A, FCF1, INTS2, RPLP2, TSEN54, RPS27A, UTP11, GTPBP3, RPL34, TRMT10A, RPS23, NHP2, TARBP2, BOP1, NSUN6, DDX49, EXOSC7, RPS28	RPL39, MTREX, RPF1, INTS8, MPHOSPH10, DIS3, UTP3, INTS6, RPL15, INTS7, TSEN15, WDR75, MRPL1, DDX21, ALKBH8, NOP58, PUS7L, SBDS, HEATR1, RRP15, RTRAF, EXOSC3, LCMT2, THUMPD1, MRPS9, RPL36A, DUS4L, TRMT61B, PRKRA, TRMT11, ALKBH1, SSB, BMT2, MAK16, INTS12, UTP4, NOL11, UTP15, OSGEPL1, FRG1, RPL17-C18orf32, RPL9, MTFMT, SMAD2, RPL17, IMP4, MTO1, PUS7, LTV1, EXOSC9, KIAA0391, PUS3, METTL2B, PNO1, MPHO…
GO:1901564	organonitrogen compound metabolic proces...	1465	11	4.9	809	0.00566	0.62379	0.866234	1	The chemical reactions and pathways involving organonitrogen compound	1.21647	-1.5776	SPNS2, ITGB8, PSMA6, CERS2, EGLN2, FTCD, GPC2, MEX3D, EEF2K, GTF2H3, SLC25A32, NDUFA11, THTPA, RPSA, UQCRHL, MBOAT2, PXYLP1, MTHFR, ARSI, MC1R, PSPH, CYR61, RPL31, MTPN, IGFBP5, DEGS1, EIF2B1, ADSS, SLC22A5, PDE8A, TNRC6B, MRAP, RPS10, NDUFA2, PDXK, DCTPP1, MRPL54, ST3GAL2, RPS21, SLC19A1, TET2, OSBPL5, CSGALNACT2, RPS19, NDUFB2, NME3, UMPS, NAGS, RFK, SECISBP2L, FIGNL1, BPNT1, PFKFB4, TSPO, DAPK…	PSMD5, EXTL2, PPT1, PPCS, ATP5F1EP2, EIF3M, MRPS30, RPL39, GSPT1, MMADHC, LINC02210-CRHR1, CPD, NFE2L2, EIF3E, PSMD12, PAIP1, AZIN1, HPSE, RHOQ, PRKD3, ADNP, CPE, SLC22A4, GSPT2, HSP90AA1, AASDH, RPL15, UQCRB, EIF2AK2, DNM1L, CPA3, MRPL3, HMMR, CSNK2A2, PSMA1, MRPL1, LUM, MSH2, PPP1R15B, ERO1A, EIF2A, NPEPPS, IARS, FAM129A, EEF1E1, IREB2, NPM1, NCK1, PUM2, NAMPT, ARG2, PSMC6, GCH1, EIF1B, ARSK, C…
GO:1901575	organic substance catabolic process	1255	10	4.19	1007	0.00579	0.93328	0.866234	1	The chemical reactions and pathways resulting in the breakdown of an organic substance, any molecular entity containing carbon	1.12829	-1.53982	ACAD11, PSMA6, SKP2, EGLN2, EXOSC6, RNF6, FTCD, PNPLA7, KIF14, GPC2, PPP1R3D, PNPT1, RPSA, ANAPC7, UBC, POP1, ADAM9, RPL31, PRKCE, SLC27A4, SOCS4, PDE8A, SUFU, TNRC6B, RPS10, DCTPP1, PTPN3, UBXN2A, RPS21, TET2, RNF166, RPS19, PYGB, THRA, UFL1, PFKFB4, ANAPC2, CBL, MDM4, LDLR, POMT2, GGT7, FBXL19, EDC3, HTT, ZHX2, RPL10, UQCC2, DNA2, PRKAA1, SPHK1, ANAPC11, AKR1C3, LNPEP, DDX6, RPL41, RPS8, RPS29,…	PSMD5, UBE2D3, PPT1, OMA1, RPL39, LYPLA1, RNASEH2B, MTREX, GSPT1, UCHL5, NFE2L2, EIF3E, PSMD12, USP25, TENT2, USP38, PAIP1, AZIN1, HPSE, GPD2, DIS3, GSPT2, FMN2, HSP90AA1, RPL15, BNIP3L, LIPA, TMTC3, USP14, UBE2N, TMF1, TATDN1, VPS37A, RFFL, HMMR, VPS36, PSMA1, USP9Y, ANAPC10, LUM, SNX3, ZMPSTE24, NPEPPS, TRIM13, SMURF2, SUMO1, LYPLAL1, TAF9, PSMC6, ABCD3, TOPORS, CRBN, WWP1, CDC23, PPP2R5C, UBE3…
GO:0000461	endonucleolytic cleavage to generate mat...	2	1	0.01	17	0.00667	0.00667	0.866234	1	Endonucleolytic cleavage at the 3'-end of the SSU-rRNA from an originally tricistronic rRNA transcript that contained the Small Subunit (SSU) rRNA, the 5.8S rRNA, and the Large Subunit (LSU) rRNA in that order from 5' to 3' along the primary transcript, to produce the mature end of the SSU-rRNA	0.779798	0.779798	RPSA, RPS21
GO:0002536	respiratory burst involved in inflammato...	2	1	0.01	1077	0.00667	1	0.866234	1	A phase of elevated metabolic activity, during which oxygen consumption increases following a stimulus as part of an inflammatory response; this leads to the production, by an NADH dependent system, of hydrogen peroxide (H2O2), superoxide anions and hydroxyl radicals, resulting in an increase in their intracellular or extracellular levels	0.607536	0.607536	RPS19, DUSP10
GO:0003278	apoptotic process involved in heart morp...	2	1	0.01	18	0.00667	0.00667	0.866234	1	Any apoptotic process that contributes to the shaping of the heart	0.175968	0.175968	CYR61	TGFB2
GO:0006407	rRNA export from nucleus	2	1	0.01	19	0.00667	0.00667	0.866234	1	The directed movement of rRNA from the nucleus to the cytoplasm; the rRNA is usually in the form of ribonucleoproteins	0.256601	0.256601	RPSA
GO:0010609	mRNA localization resulting in posttrans...	2	1	0.01	20	0.00667	0.00667	0.866234	1	Any process that modulates the frequency, rate or extent of gene expression after the production of a mRNA transcript by its transport into, or maintainance in, a specific location within the cell	0.448444	0.448444	MEX3D
GO:0032276	regulation of gonadotropin secretion	2	1	0.01	1078	0.00667	1	0.866234	1	Any process that modulates the frequency, rate or extent of the regulated release of a gonadotropin	0.66281	0.66281	KISS1, SMAD4
GO:0032278	positive regulation of gonadotropin secr...	2	1	0.01	1079	0.00667	1	0.866234	1	Any process that activates or increases the frequency, rate or extent of the regulated release of a gonadotropin	0.66281	0.66281	KISS1, SMAD4
GO:0033684	regulation of luteinizing hormone secret...	2	1	0.01	1080	0.00667	1	0.866234	1	Any process that modulates the frequency, rate or extent of the regulated release of luteinizing hormone	0.66281	0.66281	KISS1, SMAD4
GO:0033686	positive regulation of luteinizing hormo...	2	1	0.01	21	0.00667	0.00667	0.866234	1	Any process that activates or increases the frequency, rate or extent of the regulated release of luteinizing hormone	0.66281	0.66281	KISS1, SMAD4
GO:0045218	zonula adherens maintenance	2	1	0.01	22	0.00667	0.00667	0.866234	1	Maintaining the zonula adherens junction, the cell-cell adherens junction formed near the apex of epithelial cells	0.0725268	0.0725268	KIFC3	PLEKHA7
GO:0060264	regulation of respiratory burst involved...	2	1	0.01	1081	0.00667	1	0.866234	1	Any process that modulates the rate, frequency or extent of a phase of elevated metabolic activity, during which oxygen consumption increases made as a defense response ; this leads to the production, by an NADH dependent system, of hydrogen peroxide (H2O2), superoxide anions and hydroxyl radicals	0.607536	0.607536	RPS19, DUSP10
GO:0060266	negative regulation of respiratory burst...	2	1	0.01	23	0.00667	0.00667	0.866234	1	Any process that decreases the rate, frequency or extent of a phase of elevated metabolic activity, during which oxygen consumption increases made as a defense response ; this leads to the production, by an NADH dependent system, of hydrogen peroxide (H2O2), superoxide anions and hydroxyl radicals	0.607536	0.607536	RPS19, DUSP10
GO:0060267	positive regulation of respiratory burst	2	1	0.01	1082	0.00667	1	0.866234	1	Any process that increases the rate frequency or extent of a phase of elevated metabolic activity, during which oxygen consumption increases; this leads to the production, by an NADH dependent system, of hydrogen peroxide (H2O2), superoxide anions and hydroxyl radicals	0.249109	0.249109	RPS19
GO:0060988	lipid tube assembly	2	1	0.01	24	0.00667	0.00667	0.866234	1	The aggregation, arrangement and bonding together of a set of macromolecules to form a macromolecular complex that contains a tube of lipid surrounded by a protein coat involved in membrane shaping of vesicle membranes as the fuse or undergo fission	0.101033	0.101033	BIN1	SNX9
GO:0071460	cellular response to cell-matrix adhesio...	2	1	0.01	25	0.00667	0.00667	0.866234	1	Any process that results in a change in state or activity of a cell (in terms of movement, secretion, enzyme production, gene expression, etc.) as a result of cell-matrix adhesion	0.655537	0.655537	SKP2
GO:0009892	negative regulation of metabolic process	1726	12	5.77	342	0.0068	0.15282	0.871795	1	Any process that stops, prevents, or reduces the frequency, rate or extent of the chemical reactions and pathways within a cell or an organism	1.17043	-1.72501	LRP8, ITGB8, PSMA6, KAT6A, KLF12, EXOSC6, SKIL, CNPY2, ATAD2B, SOCS7, MEX3D, H3F3A, SH3RF1, NPAT, KLF16, TOB2, C1D, FZD8, PRKAR2B, CDYL, HES6, PNPT1, ARHGAP35, PBLD, CDK9, RPSA, HIST1H2AG, SH3RF2, TSNAX, PRKAR1B, ZBTB18, ANAPC7, TAF3, UBC, BAHD1, TAF9B, WDR81, CREBZF, PREX1, TBX2, GFI1, RPL31, WFDC3, BIRC6, GON4L, IGFBP5, RASSF2, PRKCE, IFI27, STRN3, SOCS4, PPM1F, HMG20A, SUFU, BRCA1, TNRC6B, RPS…	POT1, FAM220A, PSMD5, ZNF675, HAT1, UBE2D3, ARRDC3, THRB, TERF2IP, RPL39, RNASEH2B, GSPT1, EPC1, RNF2, UCHL5, EIF3E, PSMD12, USP25, TENT2, PDCD10, WDR35, PAIP1, CREB1, AZIN1, MPHOSPH10, DYRK1A, SIN3A, DIS3, ADNP, BAZ2A, ITM2B, ZBTB1, ZMYND11, GSPT2, FMN2, RPL15, NFIL3, EIF2AK2, STAT1, ZNF224, USP14, IRF2, KDM5A, PTBP3, TMF1, LYN, AKIRIN2, GLIS3, ZNF567, EED, RFFL, BTAF1, TMEM59, CAMK2N1, PSMA1, Z…
GO:0016032	viral process	699	7	2.34	689	0.00704	0.45373	0.891139	1	A multi-organism process in which a virus is a participant. The other participant is the host. Includes infection of a host cell, replication of the viral genome, and assembly of progeny virus particles. In some cases the viral genetic material may integrate into the host genome and only subsequently, under particular circumstances, 'complete' its life cycle	0.934297	-1.37583	CARD9, PKN2, POLR3K, CCNK, CDK9, RPSA, UBC, CREBZF, GFI1, RPL31, IFNGR2, BIN1, CHUK, TAF4, CAMLG, RPS10, RPS21, RPS19, NOTCH1, TAP2, SCRIB, LDLR, TRIM5, SUPT6H, IKBKG, RPL10, TAP1, POLR3G, DDX6, PAK2, RPL41, RPS8, RPS29, NLRP3, KRT7, P4HB, TFAP4, TOP2A, RPS12, RBL1, SIVA1, TMEM250, ISG15, TGFB1, DNAJC3, PSMB10, RPL21, PTBP1, RPL35A, SAMHD1, RPL37A, SEPT6, MAVS, RPLP2, IRF3, RPS27A, PACS2, CHMP7, …	ITGB1, XPR1, RPL39, TNPO1, CREB1, TAF5, PIK3R1, DYRK1A, SIN3A, MON1B, GPAM, ZMYND11, RPL15, BUB1, EIF2AK2, GTF2B, VRK2, STAT1, BNIP3L, LYN, VPS37A, DYNC1LI1, DDX21, SNX3, NUPL2, TRIM13, SUMO1, NPM1, VTA1, NUP35, PUM2, PDGFRA, NUP54, GTF2F2, CHMP2B, WWP1, KPNA3, UBE3A, PSMA4, DHX36, OAS3, AC068234.1, FAM111A, IVNS1ABP, MSH6, LMBRD1, FBXW7, RTRAF, NUP37, GTF2E1, NUP205, TPT1, RAB6A, IFIT5, VAPA, DD…
GO:0044764	multi-organism cellular process	701	7	2.34	692	0.00715	0.45569	0.89375	1	Any process that is carried out at the cellular level which involves another organism of the same or different species	0.934297	-1.37583	CARD9, PKN2, POLR3K, CCNK, CDK9, RPSA, UBC, CREBZF, GFI1, RPL31, IFNGR2, BIN1, CHUK, SLC22A5, TAF4, CAMLG, RPS10, RPS21, RPS19, NOTCH1, TAP2, SCRIB, LDLR, TRIM5, SUPT6H, IKBKG, RPL10, TAP1, POLR3G, DDX6, PAK2, RPL41, RPS8, RPS29, NLRP3, KRT7, P4HB, TFAP4, TOP2A, RPS12, RBL1, SIVA1, TMEM250, ISG15, TGFB1, DNAJC3, PSMB10, RPL21, PTBP1, RPL35A, SAMHD1, RPL37A, SEPT6, MAVS, RPLP2, IRF3, RPS27A, PACS2…	ITGB1, XPR1, RPL39, TNPO1, CREB1, TAF5, PIK3R1, DYRK1A, SIN3A, MON1B, GPAM, ZMYND11, RPL15, BUB1, EIF2AK2, GTF2B, VRK2, STAT1, BNIP3L, LYN, VPS37A, DYNC1LI1, DDX21, SNX3, NUPL2, TRIM13, SUMO1, NPM1, VTA1, NUP35, PUM2, PDGFRA, NUP54, GTF2F2, CHMP2B, WWP1, KPNA3, UBE3A, PSMA4, DHX36, OAS3, AC068234.1, FAM111A, IVNS1ABP, MSH6, LMBRD1, FBXW7, RTRAF, NUP37, GTF2E1, NUP205, TPT1, RAB6A, IFIT5, VAPA, DD…
GO:0022602	ovulation cycle process	39	2	0.13	283	0.00741	0.11595	0.914815	1	A process involved in the sexual cycle seen in females, often with physiologic changes in the endometrium that recur at regular intervals during the reproductive years	0.656596	-0.436754	ADAMTS1, TAF4, KISS1, KITLG, SMAD4, FOXO3, STAT5B, BCL2L1, IMMP2L	PDGFRA, UBE3A, CASP2, TGFB2, EIF2B2
GO:0034622	cellular macromolecular complex assembly	708	7	2.37	581	0.00754	0.32617	0.919512	1	The aggregation, arrangement and bonding together of a set of macromolecules to form a complex, carried out at the cellular level	1.02274	-1.51107	KAT6A, IPO4, NUFIP1, MZT1, SNAP29, ARHGAP18, H3F3A, VILL, GTF2H3, NDUFA11, RPSA, UBC, TAF9B, PREX1, SPIRE2, MTPN, BIN1, FCHSD2, RPA3, COBLL1, TAF4, PRKCE, WASF3, HIST1H2BJ, RPS10, NDUFA2, PET100, MYOM2, RPS19, DDX20, ARPC1B, NDUFB2, SLAIN2, ARFIP1, THRA, ARMC4, SMAD4, MECP2, EDC3, RPL10, UQCC2, H1FX, DDX6, KAT6B, NLRP3, NDUFA9, COX14, CTTN, BRF1, DDX28, TGFB1, SNAP23, TSPYL4, NDUFB6, MAPT, MCM2, …	CETN2, PSMD5, DNAJC28, HAT1, SLU7, SRP19, RPF1, BRIX1, CREB1, ARPC5, ITGB3BP, CENPQ, PFN2, HSP90AA1, UQCRB, EIF2AK2, GTF2B, PTGES3, DNM1L, NAP1L1, RASA1, RTN4, TOMM20, EIF2A, NPM1, NCK1, PUM2, TAF9, MBD2, PSMC6, PSMG1, SBDS, ATPAF1, NDUFS1, CAPZA1, TMOD1, STRAP, CAPZA2, MNAT1, SEC24B, CENPI, GTF2H1, AP003108.2, CCNH, PSMG2, TCP1, VAMP3, MTERF3, NUP205, EXOC8, SENP6, DNAAF5, SRPK1, SET, RAB1A, NDU…
GO:0044403	symbiosis, encompassing mutualism throug...	717	7	2.4	712	0.00807	0.47122	0.972289	1	An interaction between two organisms living together in more or less intimate association. The term host is usually used for the larger (macro) of the two members of a symbiosis. The smaller (micro) member is called the symbiont organism. Microscopic symbionts are often referred to as endosymbionts. The various forms of symbiosis include parasitism, in which the association is disadvantageous or …	0.934297	-1.37583	CARD9, PKN2, POLR3K, CCNK, CDK9, RPSA, UBC, CREBZF, GFI1, RPL31, IFNGR2, BIN1, CHUK, SLC22A5, TAF4, CAMLG, RPS10, RPS21, RPS19, NOTCH1, TAP2, CBL, SCRIB, LDLR, TRIM5, SUPT6H, IKBKG, RPL10, TAP1, POLR3G, DDX6, PAK2, RPL41, RPS8, RPS29, NLRP3, KRT7, P4HB, TFAP4, TOP2A, RPS12, RBL1, SIVA1, CDH1, TMEM250, ISG15, TGFB1, DNAJC3, PSMB10, RPL21, PTBP1, RPL35A, SAMHD1, RPL37A, SEPT6, MAVS, RPLP2, IRF3, RP…	ITGB1, XPR1, RPL39, TNPO1, CREB1, TAF5, PIK3R1, DYRK1A, SIN3A, MON1B, GPAM, ZMYND11, RPL15, BUB1, EIF2AK2, GTF2B, VRK2, STAT1, BNIP3L, LYN, VPS37A, DYNC1LI1, DDX21, SNX3, NUPL2, TRIM13, SUMO1, NPM1, VTA1, NUP35, PUM2, PDGFRA, NUP54, GTF2F2, CHMP2B, WWP1, KPNA3, UBE3A, PSMA4, DHX36, OAS3, AC068234.1, FAM111A, IVNS1ABP, TCP1, MSH6, LMBRD1, FBXW7, RTRAF, NUP37, GTF2E1, NUP205, TPT1, RAB6A, IFIT5, VA…
GO:0044419	interspecies interaction between organis...	719	7	2.4	714	0.00819	0.47315	0.975	1	Any process in which an organism has an effect on an organism of a different species	0.934297	-1.37583	CARD9, PKN2, POLR3K, CCNK, CDK9, RPSA, UBC, CREBZF, GFI1, RPL31, IFNGR2, BIN1, CHUK, SLC22A5, TAF4, CAMLG, RPS10, RPS21, RPS19, NOTCH1, TAP2, CBL, SCRIB, LDLR, MECP2, TRIM5, SUPT6H, IKBKG, RPL10, TAP1, POLR3G, DDX6, PAK2, RPL41, RPS8, RPS29, NLRP3, KRT7, P4HB, TFAP4, TOP2A, RPS12, RBL1, SIVA1, CDH1, TMEM250, ISG15, TGFB1, DNAJC3, PSMB10, RPL21, PTBP1, RPL35A, SAMHD1, RPL37A, SEPT6, MAVS, RPLP2, I…	ITGB1, XPR1, RPL39, TNPO1, CREB1, TAF5, PIK3R1, DYRK1A, SIN3A, MON1B, GPAM, ZMYND11, RPL15, BUB1, EIF2AK2, GTF2B, VRK2, STAT1, BNIP3L, LYN, VPS37A, DYNC1LI1, DDX21, SNX3, NUPL2, TRIM13, SUMO1, NPM1, VTA1, NUP35, PUM2, PDGFRA, NUP54, GTF2F2, CHMP2B, WWP1, KPNA3, UBE3A, PSMA4, DHX36, OAS3, AC068234.1, FAM111A, IVNS1ABP, TCP1, MSH6, LMBRD1, FBXW7, RTRAF, NUP37, GTF2E1, NUP205, TPT1, RAB6A, IFIT5, VA…
GO:0009056	catabolic process	1541	11	5.15	968	0.00835	0.85474	0.982353	1	The chemical reactions and pathways resulting in the breakdown of substances, including the breakdown of carbon compounds with the liberation of energy for use by the cell or organism	1.1293	-1.62032	ACAD11, PSMA6, SKP2, EGLN2, EXOSC6, RNF6, FTCD, PNPLA7, KIF14, VPS13C, GPC2, SNAP29, PIK3C2B, PPP1R3D, PNPT1, RPSA, ACBD5, ANAPC7, UBC, POP1, ADAM9, RPL31, LAMTOR4, PRKCE, SLC27A4, SOCS4, PDE8A, SUFU, TNRC6B, RPS10, DCTPP1, PTPN3, UBXN2A, RPS21, TBC1D14, TET2, RNF166, RPS19, PYGB, THRA, UFL1, TOMM5, PFKFB4, TSPO, ANAPC2, DAPK3, CBL, MDM4, LDLR, POMT2, GGT7, TRIM5, FBXL19, IKBKG, EDC3, HTT, ZHX2, …	ITGB1, PSMD5, UBE2D3, PPT1, OMA1, RPL39, LYPLA1, RNASEH2B, MTREX, GSPT1, UCHL5, NFE2L2, EIF3E, COL11A1, PSMD12, USP25, TENT2, USP38, PAIP1, AZIN1, HPSE, GPD2, DIS3, GSPT2, FMN2, HSP90AA1, RPL15, BNIP3L, LIPA, DNM1L, TMTC3, USP14, UBE2N, TMF1, TATDN1, VPS37A, RFFL, SNX14, HMMR, CSNK2A2, TMEM59, VPS36, DRAM2, PSMA1, USP9Y, ANAPC10, WDR75, LUM, TOMM20, SNX3, ZMPSTE24, NPEPPS, TRIM13, SMURF2, SUMO1, …
GO:0006120	mitochondrial electron transport, NADH t...	42	2	0.14	26	0.00856	0.00856	0.995349	1	The transfer of electrons from NADH to ubiquinone that occurs during oxidative phosphorylation, mediated by the multisubunit enzyme known as complex I	0.500449	-0.413814	NDUFA11, NDUFA2, NDUFB2, NDUFA9, NDUFB6	NDUFS1, NDUFA12, NDUFB1, NDUFA6, DLD
GO:0072657	protein localization to membrane	389	5	1.3	1083	0.00867	1	0.996552	1	A process in which a protein is transported to, or maintained in, a specific location in a membrane	0.87357	-1.36854	FAM126A, RPSA, TIAM1, LIN7C, TUB, RPL31, RAB26, PRKCE, AP3D1, RPS10, RPS21, RPS19, CRIPT, MYO5A, SCRIB, RPL10, RAB8B, CDK5R1, RPL41, RPS8, RPS29, EFR3A, RPS12, CDH1, CDH2, TGFB1, TOMM7, IFT122, RAMP1, RPL21, RPL35A, MIEF1, PIGW, MPP5, RPL37A, PPP2R5A, PPP3R1, RPLP2, MIEF2, ARHGAP44, ATG4B, RPS27A, EZR, PACS2, DENND4C, RER1, RPL34, RDX, PKDCC, RPS23, CNST, TSPAN15, BCL2L1, KIF13A, PEX5, SSNA1, ARF…	ITGB1, SRP19, RPL39, LYPLA1, PIK3R1, RHOQ, CPE, HSP90AA1, RPL15, YWHAZ, REEP1, TMEM59, PEX3, RAB11A, NUP54, PRNP, GOLPH3L, BLZF1, EPB41L3, YWHAH, CALM2, SDCBP, BBIP1, VAMP3, GOLGA7, EGFR, MFF, RPL36A, MAPK8, SRP72, FGF13, RAB10, SRP54, SH3GLB1, SRP14, HSPA4, RAPGEF2, RPL17-C18orf32, SRP9, ATG4A, RPL9, RPL17, MTCL1, C2CD5, FNTA, RAB8A, PLS1, PKP2, TRAM1, CLASP2, EMP2, PDZD11, ACSL3, TIMM9, SSR1, S…
GO:0006091	generation of precursor metabolites and ...	249	4	0.83	314	0.00898	0.13657	1	1	The chemical reactions and pathways resulting in the formation of precursor metabolites, substances from which energy is derived, and any process involved in the liberation of energy from these substances	0.829261	-0.924168	PPP1R3D, D2HGDH, PNPT1, NDUFA11, THTPA, UQCRHL, UBC, NDUFA2, PYGB, NDUFB2, PFKFB4, MECP2, UQCC2, PRKAA1, STK40, NDUFA9, GSK3B, UQCRQ, NDUFB6, COX10, STBD1, RPS27A, SIRT6, CDK1, HIF1A, OGDH, TBRG4, TAZ, IRS1, FDXR, C1QTNF2, SURF1, IMMP2L	UGP2, UQCRB, FASTKD3, MSH2, NDUFS1, CALM2, AP003108.2, ALDH5A1, ATP5F1C, IDH3A, PMPCB, NDUFA12, GFPT1, PPP1R3E, NNT, GYG1, BPGM, PDHB, ETFDH, NOA1, SLC25A13, NDUFB1, FASTKD2, PPP1CC, GAPDH, COX20, PANK2, SDHD, NDUFA6, AK9, PGM2, PYGL, DLD
GO:0022613	ribonucleoprotein complex biogenesis	396	5	1.32	832	0.00933	0.651	1	1	A cellular process that results in the biosynthesis of constituent macromolecules, assembly, and arrangement of constituent parts of a complex containing RNA and proteins. Includes the biosynthesis of the constituent RNA and protein molecules, and those macromolecular modifications that are involved in synthesis or assembly of the ribonucleoprotein complex	0.916105	-1.29519	NSUN5P2, NUFIP1, EXOSC6, C1D, RPSA, RPL31, RPS10, ZNF593, RPS21, NSUN5P1, RPS19, DDX20, DHX37, EDC3, RPL10, DDX6, RPL41, RPS8, RPS29, RPS12, DDX28, NPM3, NSUN5, RPL21, RPL35A, SNRPB, NOP53, RRNAD1, RPL37A, FCF1, RPLP2, URB2, RPS27A, GEMIN8, UTP11, RPL34, RPS23, NHP2, RBM5, TARBP2, BOP1, SNRNP200, CD2BP2, TGS1, RPS27L, GEMIN7, AAMP, DDX49, EXOSC7, RPS28	SLU7, RPL39, MTREX, RPF1, BRIX1, MPHOSPH10, DIS3, UTP3, HSP90AA1, RPL15, PTGES3, WDR75, MRPL1, EIF2A, DDX21, NPM1, NOP58, PUM2, TAF9, SBDS, STRAP, HEATR1, RRP15, MTERF3, EXOSC3, THUMPD1, MRPS9, RPL36A, SRPK1, SDAD1, TRMT61B, NUP88, MALSU1, YAE1D1, EIF4B, BMT2, MAK16, RC3H1, UTP4, RBMX, NOL11, CNOT2, UTP15, PATL1, ABCE1, CNOT1, FRG1, RPL17-C18orf32, RPL9, EIF5, CRNKL1, PRPF39, RPL17, IMP4, LTV1, Z…
GO:0002679	respiratory burst involved in defense re...	3	1	0.01	1084	0.00999	1	1	1	A phase of elevated metabolic activity, during which oxygen consumption increases made as part of a defense response ; this leads to the production, by an NADH dependent system, of hydrogen peroxide (H2O2), superoxide anions and hydroxyl radicals	0.490154	0.490154	RPS19, DUSP10
GO:0045716	positive regulation of low-density lipop...	3	1	0.01	28	0.00999	0.00999	1	1	Any process that activates or increases the frequency, rate or extent of the chemical reactions and pathways resulting in the formation of low-density lipoprotein receptors	0.227457	0.227457	CNPY2	HNRNPK
GO:0048742	regulation of skeletal muscle fiber deve...	3	1	0.01	1085	0.00999	1	1	1	Any process that modulates the frequency, rate or extent of skeletal muscle fiber development. Muscle fibers are formed by the maturation of myotubes. They can be classed as slow, intermediate/fast or fast	0.17	0.17	FAM129B
GO:0048743	positive regulation of skeletal muscle f...	3	1	0.01	29	0.00999	0.00999	1	1	Any process that activates, maintains or increases the rate of skeletal muscle fiber development. Muscle fibers are formed by the maturation of myotubes. They can be classed as slow, intermediate/fast or fast	0.17	0.17	FAM129B
GO:0060268	negative regulation of respiratory burst	3	1	0.01	1086	0.00999	1	1	1	Any process that decreases the rate frequency or extent of a phase of elevated metabolic activity, during which oxygen consumption increases; this leads to the production, by an NADH dependent system, of hydrogen peroxide (H2O2), superoxide anions and hydroxyl radicals	0.531943	0.531943	RPS19, DUSP10
GO:0060591	chondroblast differentiation	3	1	0.01	30	0.00999	0.00999	1	1	The process in which a mesenchymal cell, acquires specialized structural and/or functional features of a chondroblast. Differentiation includes the processes involved in commitment of a cell to a chondroblast fate. A chondroblast is a precursor cell to chondrocytes	0.234109	0.234109	CYR61
GO:0060710	chorio-allantoic fusion	3	1	0.01	31	0.00999	0.00999	1	1	The cell-cell adhesion process in which the cells of the chorion fuse to the cells of the allantois	-0.0440457	-0.0440457	CYR61	ZFP36L1, LEF1
GO:0005977	glycogen metabolic process	46	2	0.15	32	0.0102	0.0102	1	1	The chemical reactions and pathways involving glycogen, a polydisperse, highly branched glucan composed of chains of D-glucose residues in alpha-(1->4) glycosidic linkage, joined together by alpha-(1->6) glycosidic linkages	0.579824	-0.557232	PPP1R3D, UBC, PYGB, STK40, GSK3B, STBD1, RPS27A, IRS1, C1QTNF2	UGP2, CALM2, PPP1R3E, GYG1, PPP1CC, PGM2, PYGL
GO:0006073	cellular glucan metabolic process	46	2	0.15	33	0.0102	0.0102	1	1	The chemical reactions and pathways involving glucans, polysaccharides consisting only of glucose residues	0.579824	-0.557232	PPP1R3D, UBC, PYGB, STK40, GSK3B, STBD1, RPS27A, IRS1, C1QTNF2	UGP2, CALM2, PPP1R3E, GYG1, PPP1CC, PGM2, PYGL
GO:0044042	glucan metabolic process	46	2	0.15	34	0.0102	0.0102	1	1	The chemical reactions and pathways involving glucans, polysaccharides consisting only of glucose residues	0.579824	-0.557232	PPP1R3D, UBC, PYGB, STK40, GSK3B, STBD1, RPS27A, IRS1, C1QTNF2	UGP2, CALM2, PPP1R3E, GYG1, PPP1CC, PGM2, PYGL
GO:0090287	regulation of cellular response to growt...	139	3	0.46	35	0.01087	0.01087	1	1	Any process that modulates the rate, frequency, or extent of a change in state or activity of a cell (in terms of movement, secretion, enzyme production, gene expression, etc.) as a result of a growth factor stimulus	0.749668	-0.762721	SKIL, PBLD, UBC, CYR61, LTBP1, NOTCH1, ZNF703, SMAD4, FAM129B, XIAP, NEO1, FLCN, TGFB1, CASK, HHEX, NBL1, RPS27A, HIF1A, LEMD3, VASN, HSPA5, CD109, PTPN1, TGFBR1	SLC9A6, SMURF2, STRAP, SDCBP, AC068234.1, TRIM33, GREM1, DKK1, SPRY2, SMAD2, VEGFC, IL1B, NPTN, CYFIP1, RBPJ, CDKN2B, WNT5A, ZEB1, BMP4, DKK3, TWSG1, CYFIP2, ING2, ACVR2A, NEDD4
GO:1901566	organonitrogen compound biosynthetic pro...	967	8	3.23	641	0.01189	0.39224	1	1	The chemical reactions and pathways resulting in the formation of organonitrogen compound	0.919212	-1.50142	CERS2, GPC2, MEX3D, EEF2K, GTF2H3, RPSA, PXYLP1, MC1R, PSPH, CYR61, RPL31, MTPN, IGFBP5, DEGS1, EIF2B1, ADSS, TNRC6B, MRAP, RPS10, PDXK, MRPL54, ST3GAL2, RPS21, CSGALNACT2, RPS19, NME3, UMPS, NAGS, RFK, SECISBP2L, TSPO, DAPK3, PDCL, GGT7, LARP4, RPL10, UQCC2, PRKAA1, SPHK1, DDX6, GIGYF2, RPL41, RPS8, CSNK1G2, MRPS21, RPS29, ST3GAL5, IMPDH1, RPS12, FLCN, CSPG4, TGFB1, DNAJC3, RAMP1, RPL21, PTBP1, …	EXTL2, PPCS, ATP5F1EP2, EIF3M, MRPS30, RPL39, GSPT1, LINC02210-CRHR1, NFE2L2, EIF3E, PAIP1, AZIN1, PRKD3, ADNP, GSPT2, AASDH, RPL15, EIF2AK2, MRPL3, CSNK2A2, MRPL1, LUM, PPP1R15B, EIF2A, IARS, FAM129A, EEF1E1, IREB2, NPM1, NCK1, PUM2, NAMPT, ARG2, GCH1, EIF1B, C12orf65, EIF3J, HS2ST1, PANK1, RARS, SLC35B3, ESD, CALM2, DARS2, CAPRIN1, EIF3H, WARS2, EGFR, MTIF3, ATP5F1C, HNRNPR, RMND1, MOCS2, LCMT2…
GO:0006112	energy reserve metabolic process	50	2	0.17	36	0.01198	0.01198	1	1	The chemical reactions and pathways by which a cell derives energy from stored compounds such as fats or glycogen	0.579824	-0.611524	PPP1R3D, UBC, PYGB, STK40, GSK3B, STBD1, RPS27A, IRS1, C1QTNF2	UGP2, CALM2, GFPT1, PPP1R3E, GYG1, PPP1CC, PGM2, PYGL
GO:0031398	positive regulation of protein ubiquitin...	147	3	0.49	37	0.01264	0.01264	1	1	Any process that activates or increases the frequency, rate or extent of the addition of ubiquitin groups to a protein	0.821025	-1.14098	PSMA6, SKP2, CDK9, ANAPC7, UBC, BRCA1, NDFIP2, ANAPC2, SPHK1, ANAPC11, XIAP, CCDC22, PSMB10, BMI1, RPS27A, NDFIP1, CDK1, TICAM1, RASSF5, HSPA5, PSMA7, GORASP1	PSMD5, ARRDC3, PSMD12, UBE2N, DCUN1D5, PSMA1, ANAPC10, PSMC6, TOPORS, CDC23, UBE3A, PSMA4, FBXW7, DCUN1D4, RNF20, RAB1A, DERL1, FKBP1A, PSMD14, CDC27, PSMD6, UBE2E1, RIPK2, PSMD7, PTTG1IP, BIRC2
GO:0032275	luteinizing hormone secretion	4	1	0.01	1087	0.0133	1	1	1	The regulated release of luteinizing hormone, a gonadotropic glycoprotein hormone secreted by the anterior pituitary	0.178927	0.178927	KISS1, SMAD4, TBX3	TMF1
GO:0042262	DNA protection	4	1	0.01	38	0.0133	0.0133	1	1	Any process in which DNA is protected from damage by, for example, oxidative stress	0.0840491	0.0840491	DCTPP1
GO:0045217	cell-cell junction maintenance	4	1	0.01	1088	0.0133	1	1	1	The maintenance of junctions between cells	0.0597658	0.0597658	KIFC3	PLEKHA7
GO:0060124	positive regulation of growth hormone se...	4	1	0.01	39	0.0133	0.0133	1	1	Any process that increases the frequency, rate or extent of the regulated release of growth hormone from a cell	0.382323	0.382323	KISS1, SERP1
GO:0042698	ovulation cycle	53	2	0.18	343	0.01339	0.1553	1	1	The type of sexual cycle seen in females, often with physiologic changes in the endometrium that recur at regular intervals during the reproductive years	0.689833	-0.768622	ADAMTS1, TAF4, EGR1, KISS1, KITLG, SMAD4, FOXO3, STAT5B, BCL2L1, IMMP2L	ADNP, PCNA, PDGFRA, UBE3A, EGFR, OXTR, HAS2, CASP2, AXL, SERPINF1, TGFB2, NCOA1, EIF2B2
GO:0044264	cellular polysaccharide metabolic proces...	53	2	0.18	40	0.01339	0.01339	1	1	The chemical reactions and pathways involving polysaccharides, polymers of more than 10 monosaccharide residues joined by glycosidic linkages, as carried out by individual cells	0.618659	-0.599667	PPP1R3D, UBC, CSGALNACT2, PYGB, STK40, GSK3B, B4GAT1, STBD1, RPS27A, IRS1, C1QTNF2	UGP2, CALM2, HAS2, PPP1R3E, GYG1, PPP1CC, PGM2, PYGL
GO:0010257	NADH dehydrogenase complex assembly	54	2	0.18	41	0.01388	0.01388	1	1	The aggregation, arrangement and bonding together of a set of components to form an NADH dehydrogenase complex	0.526055	-0.510887	NDUFA11, NDUFA2, NDUFB2, NDUFA9, NDUFB6, TAZ, NDUFAF4	NDUFS1, NDUFA12, NDUFAF6, NUBPL, NDUFB1, NDUFA6, NDUFAF7
GO:0032981	mitochondrial respiratory chain complex ...	54	2	0.18	42	0.01388	0.01388	1	1	The aggregation, arrangement and bonding together of a set of components to form mitochondrial respiratory chain complex I	0.526055	-0.510887	NDUFA11, NDUFA2, NDUFB2, NDUFA9, NDUFB6, TAZ, NDUFAF4	NDUFS1, NDUFA12, NDUFAF6, NUBPL, NDUFB1, NDUFA6, NDUFAF7
GO:0097031	mitochondrial respiratory chain complex ...	54	2	0.18	43	0.01388	0.01388	1	1	The biogenesis of a mitochondrial respiratory chain complex I, a protein complex located in the mitochondrial inner membrane that forms part of the mitochondrial respiratory chain. Includes the synthesis of constituent proteins and their aggregation, arrangement and bonding together	0.526055	-0.510887	NDUFA11, NDUFA2, NDUFB2, NDUFA9, NDUFB6, TAZ, NDUFAF4	NDUFS1, NDUFA12, NDUFAF6, NUBPL, NDUFB1, NDUFA6, NDUFAF7
GO:0042127	regulation of cell proliferation	810	7	2.71	44	0.01529	0.01529	1	1	Any process that modulates the frequency, rate or extent of cell proliferation	1.10135	-1.42058	ADAMTS1, FGFR3, SKP2, CERS2, FOSL2, KIF14, SSTR1, TAX1BP3, TOB2, SOD2, PBLD, TIAM1, TBX2, CYR61, IGFBP7, BIRC6, IGFBP5, RPA3, BRCA1, CCAR1, EGR1, AHR, HMGN5, CDCA7L, KISS1, PLXNB1, DDX20, NOTCH1, SLC35F6, UFL1, KITLG, ATOH8, TSPO, ZNF703, SMAD4, MDM4, MECP2, KRAS, MAGED1, COPS9, PRKAA1, SPHK1, ROMO1, FAM129B, FOXM1, AKR1C3, XIAP, HILPDA, PBRM1, PLCD1, ATAD5, RNF10, S1PR2, GATA2, TSPAN31, TFAP4, J…	ITGB1, MTBP, RNASEH2B, PDGFD, NOV, NRK, PDCD10, GDF11, CREB1, ABCC4, HPSE, MARCH7, GPAM, EIF2AK2, SYF2, STAT1, GNG5, LYN, IFT74, AKIRIN2, NAP1L1, RTN4, KRIT1, EEF1E1, NPM1, NCK1, NAMPT, MBD2, TNFRSF11B, PDGFRA, PRNP, TOPORS, C18orf54, MCC, PPP2R5C, CIP2A, STRAP, MNAT1, SDCBP, AC068234.1, NKX3-1, BCHE, HIST1H2AC, RBBP9, UBE2A, FBXW7, EGFR, TTK, GLMN, SH3BP4, PHIP, AGTR1, ISL1, IQGAP3, TFAP2A, PLAC…
GO:1903322	positive regulation of protein modificat...	161	3	0.54	45	0.01613	0.01613	1	1	Any process that activates or increases the frequency, rate or extent of protein modification by small protein conjugation or removal	0.821025	-1.14098	PSMA6, SKP2, CDK9, ANAPC7, UBC, BRCA1, NDFIP2, ANAPC2, SPHK1, ANAPC11, XIAP, CCDC22, PSMB10, BMI1, RPS27A, TOLLIP, NDFIP1, CDK1, TICAM1, RASSF5, HSPA5, PSMA7, GORASP1	PSMD5, ARRDC3, PSMD12, UBE2N, DCUN1D5, PSMA1, ANAPC10, PSMC6, TOPORS, CDC23, UBE3A, PSMA4, FBXW7, DCUN1D4, RNF20, RAB1A, DERL1, FKBP1A, PSMD14, CDC27, PSMD6, UBE2E1, RIPK2, PSMD7, PTTG1IP, BIRC2
GO:0001542	ovulation from ovarian follicle	5	1	0.02	46	0.0166	0.0166	1	1	The process leading to the rupture of the follicle, releasing the centrally located oocyte into the oviduct. An example of this is found in Mus musculus	0.305268	0.305268	ADAMTS1, FOXO3
GO:0007000	nucleolus organization	5	1	0.02	47	0.0166	0.0166	1	1	A process that is carried out at the cellular level which results in the assembly, arrangement of constituent parts, or disassembly of the nucleolus	0.13782	0.13782	RPS19
GO:0009211	pyrimidine deoxyribonucleoside triphosph...	5	1	0.02	1089	0.0166	1	1	1	The chemical reactions and pathways involving pyrimidine deoxyribonucleoside triphosphate, a compound consisting of a pyrimidine base linked to a deoxyribose sugar esterified with triphosphate on the sugar	0.0130365	0.0130365	DCTPP1	TBPL1, TYMS
GO:0033690	positive regulation of osteoblast prolif...	5	1	0.02	48	0.0166	0.0166	1	1	Any process that activates or increases the rate or extent of osteoblast proliferation	0.0244667	0.0244667	CYR61	HPSE
GO:0051029	rRNA transport	5	1	0.02	1090	0.0166	1	1	1	The directed movement of rRNA, ribosomal ribonucleic acid, into, out of or within a cell, or between cells, by means of some agent such as a transporter or pore	0.371713	0.371713	PNPT1, RPSA, TST
GO:0060123	regulation of growth hormone secretion	5	1	0.02	49	0.0166	0.0166	1	1	Any process that modulates the frequency, rate or extent of the regulated release of growth hormone from a cell	0.304698	0.304698	KISS1, SERP1
GO:0003206	cardiac chamber morphogenesis	60	2	0.2	50	0.01695	0.01695	1	1	The process in which a cardiac chamber is generated and organized. A cardiac chamber is an enclosed cavity within the heart	0.667142	-0.811846	ADAMTS1, TBX2, CYR61, NOTCH1, SMAD4, TGFB1, HIF1A, TBX3, TGFBR1	DVL3, COL11A1, CPE, ISL1, NOTCH2, FKBP1A, MED1, ID2, RBPJ, WNT5A, RARB, BMP4, PKP2, TGFB2, SEMA3C, EGLN1
GO:0005976	polysaccharide metabolic process	60	2	0.2	51	0.01695	0.01695	1	1	The chemical reactions and pathways involving a polysaccharide, a polymer of many (typically more than 10) monosaccharide residues linked glycosidically	0.631672	-0.611002	PPP1R3D, UBC, CSGALNACT2, PYGB, STK40, GSK3B, TGFB1, B4GAT1, STBD1, RPS27A, IRS1, C1QTNF2	UGP2, CALM2, HAS2, PPP1R3E, GYG1, PPP1CC, PGM2, NFKB1, PYGL
GO:0000165	MAPK cascade	463	5	1.55	1091	0.01749	1	1	1	An intracellular protein kinase cascade containing at least a MAPK, a MAPKK and a MAP3K. The cascade can also contain two additional tiers: the upstream MAP4K and the downstream MAP Kinase-activated kinase (MAPKAPK). The kinases in each tier phosphorylate and activate the kinases in the downstream tier to transmit a signal within a cell	0.98244	-1.38718	CARD9, PSMA6, FGFR3, PSPN, SH3RF1, FZD8, TIAM1, UBC, CYR61, ADAM9, CHUK, RASSF2, PRKCE, MEF2D, PDE8A, MADD, AKAP13, NRAS, KISS1, KITLG, SMAD4, TRIM5, KRAS, IKBKG, MAGED1, TAB3, PRKAA1, SEMA7A, FOXM1, STK40, MARK3, MAP2K3, S1PR2, C5AR1, FLCN, CDH2, CSPG4, TGFB1, RAPGEF1, PSMB10, DUSP10, CRKL, HRAS, PTPRJ, EFNA1, RPS27A, EZR, APIP, CDK1, HMGCR, MAPK12, HSF1, IRAK2, PDGFRB, NENF, TIMP3, ATF3, DUSP8,…	PSMD5, ZNF675, DVL3, PDGFD, NRK, PSMD12, PDCD10, GDF11, MAP2K4, ZMYND11, EIF2AK2, VRK2, UBE2N, LYN, RASA1, PSMA1, RASGRF1, PDGFRA, PSMC6, HSPH1, PSMA4, ATP6AP2, TAB2, CALM2, ARL6IP5, SDCBP, DNAJC27, AIDA, MAP3K20, DNAJA1, FBXW7, EGFR, RAP1B, MBIP, HIPK3, MAPK8, IQGAP3, OXTR, LAMTOR3, FGF13, GPS2, MAP3K21, IQGAP1, SYNJ2BP, JAK1, STK3, PSMD14, PIK3CB, RGS2, RAPGEF2, HACD3, SHC1, C5, TAOK3, MED1, RY…
GO:0022618	ribonucleoprotein complex assembly	166	3	0.55	1092	0.01749	1	1	1	The aggregation, arrangement and bonding together of proteins and RNA molecules to form a ribonucleoprotein complex	0.695435	-1.10237	NUFIP1, RPSA, RPS10, RPS19, DDX20, EDC3, RPL10, DDX6, DDX28, SNRPB, NOP53, GEMIN8, RBM5, TARBP2, SNRNP200, CD2BP2, TGS1, RPS27L, GEMIN7, RPS28	SLU7, RPF1, BRIX1, HSP90AA1, PTGES3, EIF2A, NPM1, PUM2, TAF9, SBDS, STRAP, MTERF3, SRPK1, EIF4B, RC3H1, RBMX, CNOT2, PATL1, CNOT1, EIF5, CRNKL1, PRPF39, ZNHIT6, FASTKD2, EIF4H, PSIP1, SRPK2, LUC7L3, SNRPG
GO:0051704	multi-organism process	1260	9	4.21	632	0.01851	0.37862	1	1	A biological process which involves another organism of the same or different species	1.16693	-1.5238	SPIN4, ADAMTS1, CARD9, PKN2, SKIL, POLR3K, CCNK, SSTR1, H3F3A, TOB2, TPGS1, CDYL, CLGN, MAK, CDK9, RPSA, CDK19, TSNAX, UBC, CREBZF, REC8, GFI1, IGFBP7, ADAM9, RPL31, IFNGR2, LIMK2, KLHL26, PALM3, IGFBP5, BIN1, CHUK, FNDC3A, SLC22A5, TAF4, PRKCE, NPHP1, CAMLG, HIST1H2BJ, RPS10, WDR33, SBNO2, SCMH1, RPS21, SMAD5, KISS1, RPS19, DDX20, KPNA6, UMPS, SYT11, NOTCH1, SPATA5, THRA, GOLGA3, TSPO, TAP2, SPA…	ITGB1, CETN2, THRB, XPR1, RPL39, LINC02210-CRHR1, RNF2, NRK, TNPO1, WDR35, CREB1, TAF5, PIK3R1, DYRK1A, SIN3A, PGM3, MAP2K4, MON1B, GPAM, ZMYND11, FMN2, RPL15, BUB1, EIF2AK2, GTF2B, VRK2, STAT1, ANKRD49, BNIP3L, LY96, KDM5A, TMF1, PPP2R3C, LYN, AKIRIN2, VPS37A, CSNK2A2, DYNC1LI1, USP9Y, MSH2, DDX21, SNX3, NUPL2, TRIM13, SMURF2, SUMO1, ZNF35, NPM1, NECTIN3, NCK1, VTA1, NUP35, PUM2, NAMPT, TNFRSF11…
GO:0048511	rhythmic process	173	3	0.58	261	0.01951	0.10593	1	1	Any process pertinent to the generation and maintenance of rhythms in the physiology of an organism	0.774489	-1.07458	ADAMTS1, TEF, TAF4, EGR1, AHR, KISS1, KITLG, SMAD4, MAGED1, PRKAA1, SUV39H2, CDK5R1, TOP2A, GSK3B, THRAP3, FOXO3, NR1D2, LGR4, SREBF1, STAT5B, ZFHX3, BCL2L1, MAPK9, JUN, GNA11, CRTC1, IMMP2L	CREB1, DYRK1A, SIN3A, ADNP, NFIL3, PCNA, KDM5A, NAMPT, PDGFRA, UBE3A, EGFR, HNRNPR, DDX5, MAPK8, OXTR, CBX3, HAS2, CASP2, GFPT1, HDAC2, KAT2B, NONO, ENOX2, ID2, AXL, PPP1CC, SERPINF1, PHLPP1, ENOX1, CSNK2A1, HNRNPD, RBM4B, TGFB2, SP1, NCOA1, EIF2B2, TYMS, SRD5A1
GO:0009204	deoxyribonucleoside triphosphate catabol...	6	1	0.02	1093	0.01989	1	1	1	The chemical reactions and pathways resulting in the breakdown of a deoxyribonucleoside triphosphate, a compound consisting of a nucleobase linked to a deoxyribose sugar esterified with triphosphate on the sugar	0.158939	0.158939	DCTPP1, SAMHD1
GO:0010988	regulation of low-density lipoprotein pa...	6	1	0.02	52	0.01989	0.01989	1	1	Any process that modulates the rate, frequency or extent of low-density lipoprotein particle clearance. Low-density lipoprotein particle clearance is the process in which a low-density lipoprotein particle is removed from the blood via receptor-mediated endocytosis and its constituent parts degraded	0.192895	0.192895	CNPY2, CSK	HNRNPK
GO:0010992	ubiquitin homeostasis	6	1	0.02	53	0.01989	0.01989	1	1	Any process involved in the maintenance of an internal steady state of ubiquitin monomers and free ubiquitin chains at the level of the cell	0.0541902	0.0541902	UBC
GO:0030948	negative regulation of vascular endothel...	6	1	0.02	54	0.01989	0.01989	1	1	Any process that stops, prevents, or reduces the frequency, rate or extent of vascular endothelial growth factor receptor signaling pathway activity	0.211908	0.211908	FAM129B, HHEX, PTPN1	NEDD4
GO:0034331	cell junction maintenance	6	1	0.02	1094	0.01989	1	1	1	The organization process that preserves a cell junction in a stable functional or structural state. A cell junction is a specialized region of connection between two cells or between a cell and the extracellular matrix	-0.12338	-0.12338	KIFC3	PLEKHA7, RASSF8, PKP2
GO:0071826	ribonucleoprotein complex subunit organi...	175	3	0.58	1095	0.0201	1	1	1	Any process in which macromolecules aggregate, disaggregate, or are modified, resulting in the formation, disassembly, or alteration of a ribonucleoprotein complex	0.695435	-1.10237	NUFIP1, RPSA, RPS10, RPS19, DDX20, EDC3, RPL10, DDX6, DDX28, SNRPB, NOP53, GEMIN8, RBM5, TARBP2, SNRNP200, CD2BP2, TGS1, RPS27L, GEMIN7, RPS28	SLU7, RPF1, BRIX1, HSP90AA1, PTGES3, EIF2A, NPM1, PUM2, TAF9, SBDS, STRAP, MTERF3, MTIF3, SRPK1, EIF4B, RC3H1, RBMX, CNOT2, PATL1, CNOT1, EIF5, CRNKL1, PRPF39, ZNHIT6, FASTKD2, EIF4H, PSIP1, SRPK2, LUC7L3, SNRPG
GO:0023014	signal transduction by protein phosphory...	481	5	1.61	1096	0.0203	1	1	1	A process in which the transfer of one or more phosphate groups to a substrate transmits a signal to the phosphorylated substrate	0.98244	-1.38718	CARD9, PSMA6, FGFR3, PSPN, SH3RF1, FZD8, TIAM1, UBC, CYR61, ADAM9, CHUK, RASSF2, PRKCE, MEF2D, PDE8A, MADD, AKAP13, NRAS, KISS1, KITLG, SMAD4, TRIM5, KRAS, IKBKG, MAGED1, TAB3, PRKAA1, SEMA7A, FOXM1, STK40, PAK2, MARK3, MAP2K3, S1PR2, STK10, C5AR1, FLCN, CDH2, CSPG4, TGFB1, RAPGEF1, PSMB10, DUSP10, CRKL, HRAS, PTPRJ, EFNA1, RPS27A, EZR, APIP, CDK1, HMGCR, MAPK12, HSF1, IRAK2, PDGFRB, NENF, TIMP3,…	PSMD5, ZNF675, DVL3, PDGFD, NRK, PSMD12, PDCD10, GDF11, MAP2K4, ZMYND11, EIF2AK2, VRK2, UBE2N, LYN, RASA1, PSMA1, RASGRF1, PDGFRA, PSMC6, HSPH1, PSMA4, ATP6AP2, TAB2, CALM2, ARL6IP5, SDCBP, DNAJC27, AIDA, MAP3K20, DNAJA1, FBXW7, EGFR, RAP1B, MBIP, HIPK3, MAPK8, IQGAP3, OXTR, LAMTOR3, FGF13, GPS2, MAP3K21, IQGAP1, SYNJ2BP, JAK1, STK3, PSMD14, PIK3CB, RGS2, RAPGEF2, HACD3, SHC1, C5, TAOK3, MED1, RY…
GO:0034660	ncRNA metabolic process	484	5	1.62	644	0.0208	0.39929	1	1	The chemical reactions and pathways involving non-coding RNA transcripts (ncRNAs)	1.01519	-1.25993	NSUN5P2, EXOSC6, GTF2A1, CCNK, OSGEP, TRUB1, C1D, PNPT1, CDK9, RPSA, POP1, RPL31, RPS10, RPS21, NSUN5P1, TAF8, RPS19, LAGE3, DHX37, RNASEK, RPL10, RPL41, RPS8, RPS29, BRF1, CTU1, RPS12, NPM3, NSUN5, RPL21, RPL35A, POU2F1, SNAPC1, RRNAD1, RPL37A, FCF1, HRAS, INTS2, RPLP2, TSEN54, RPS27A, SARS2, UTP11, GTPBP3, RPL34, TRMT10A, RPS23, NHP2, TARBP2, BOP1, GTF3C1, NSUN6, CD3EAP, XRN1, PHAX, DDX49, ELL,…	RPL39, MTREX, RPF1, INTS8, TAF5, MPHOSPH10, DIS3, UTP3, INTS6, RPL15, GTF2B, INTS7, TSEN15, WDR75, MRPL1, DDX21, IARS, ALKBH8, EEF1E1, NOP58, TAF9, GTF2F2, PUS7L, SBDS, RARS, NIFK, ELL2, DARS2, HEATR1, RRP15, WARS2, RTRAF, GTF2E1, EXOSC3, LCMT2, THUMPD1, MRPS9, RPL36A, DUS4L, TRMT61B, PRKRA, TRMT11, GARS, ALKBH1, SSB, DDX17, BMT2, MAK16, INTS12, UTP4, NOL11, TARS, UTP15, OSGEPL1, FRG1, RPL17-C18o…
GO:0008283	cell proliferation	1071	8	3.58	55	0.02118	0.02118	1	1	The multiplication or reproduction of cells, resulting in the expansion of a cell population	1.15599	-1.42058	ADAMTS1, AL928654.3, FGFR3, SKP2, CERS2, FOSL2, KIF14, SSTR1, H3F3A, TAX1BP3, TOB2, SOD2, PBLD, CDK9, TIAM1, TBX2, CYR61, IGFBP7, BIRC6, IGFBP5, BIN1, RPA3, HOOK3, BRCA1, PDXK, CCAR1, EGR1, AHR, HMGN5, CDCA7L, TAF8, KISS1, PLXNB1, DDX20, GINS1, NOTCH1, SLC35F6, UFL1, FIGNL1, KITLG, ATOH8, TSPO, RC3H2, ZNF703, PRG4, SMAD4, MDM4, SCRIB, MECP2, KRAS, MAGED1, COPS9, PRKAA1, SPHK1, ROMO1, FAM129B, FOX…	ITGB1, MTBP, RNASEH2B, PDGFD, NOV, NRK, PDCD10, GDF11, CREB1, ABCC4, HPSE, MARCH7, GPAM, ZMYND11, BUB1, EIF2AK2, PCNA, SYF2, STAT1, LIPA, GNG5, IRF2, LYN, IFT74, AKIRIN2, NAP1L1, RTN4, COPS2, KRIT1, USPL1, RASGRF1, EEF1E1, NPM1, NCK1, NAMPT, MBD2, TNFRSF11B, PDGFRA, PRNP, PSMG1, TOPORS, SBDS, C18orf54, PAK1IP1, MCC, PPP2R5C, CIP2A, BLZF1, STRAP, MNAT1, SDCBP, AC068234.1, C3orf58, NKX3-1, MAP3K20,…
GO:0051436	negative regulation of ubiquitin-protein...	70	2	0.23	56	0.02266	0.02266	1	1	Any process that stops, prevents, or reduces the frequency, rate or extent of ubiquitin ligase activity that contributes to the mitotic cell cycle	0.644813	-0.942602	PSMA6, ANAPC7, UBC, ANAPC2, ANAPC11, PSMB10, RPS27A, CDK1, PSMA7	PSMD5, PSMD12, PSMA1, ANAPC10, PSMC6, CDC23, PSMA4, PSMD14, CDC27, PSMD6, UBE2E1, PSMD7
GO:0048584	positive regulation of response to stimu...	1088	8	3.64	135	0.02309	0.05353	1	1	Any process that activates, maintains or increases the rate of a response to a stimulus. Response to stimulus is a change in state or activity of a cell or an organism (in terms of movement, secretion, enzyme production, gene expression, etc.) as a result of a stimulus	1.05199	-1.52922	CARD9, PSMA6, FGFR3, SKP2, EXOSC6, SKIL, FZD8, PIDD1, TIAM1, CDK19, UBC, MC1R, GFI1, CYR61, ADAM9, DOCK1, LAMTOR4, IGFBP5, CHUK, RASSF2, PRKCE, PPM1F, PDE8A, BRCA1, S100A4, MADD, AKAP13, NRAS, NDFIP2, KISS1, SHF, VAV2, RPS19, PLXNB1, BABAM1, ARPC1B, NOTCH1, KITLG, SHOC2, RC3H2, DAPK3, SMAD4, CBL, LDLR, TRIM5, KRAS, IKBKG, MAGED1, HTT, TAB3, PRKAA1, SEMA7A, SPHK1, FOXM1, AKR1C3, MUC1, XIAP, POLR3G…	ATP2C1, PSMD5, UBE2D3, ARRDC3, TERF2IP, DVL3, PDGFD, NOV, NFE2L2, NRK, PSMD12, PDCD10, WDR35, GDF11, SH3BGRL, PIK3R1, HPSE, ARPC5, SIN3A, MAP2K4, ZBTB1, HSP90AA1, EIF2AK2, YWHAZ, PRKACB, PCNA, MYLK, DNM1L, LY96, UBE2N, LYN, LPXN, PSMA1, RTN4, MSH2, MASP2, EIF2A, RASGRF1, EEF1E1, TRIM13, SMURF2, COL3A1, NCK1, PUM2, TAF9, MBD2, PDGFRA, PSMC6, PRNP, GPRC5B, NR2C1, CADM1, UBE3A, WIPF1, PSMA4, YWHAH, …
GO:0010984	regulation of lipoprotein particle clear...	7	1	0.02	57	0.02317	0.02317	1	1	Any process that modulates the rate, frequency, or extent of lipoprotein particle clearance. Lipoprotein particle clearance is the process in which a lipoprotein particle is removed from the blood via receptor-mediated endocytosis and its constituent parts degraded	0.165574	0.165574	CNPY2, CSK	HNRNPK
GO:0048711	positive regulation of astrocyte differe...	7	1	0.02	58	0.02317	0.02317	1	1	Any process that activates or increases the frequency, rate or extent of astrocyte differentiation	0.12526	0.12526	BIN1, NOTCH1	ID2
GO:0060263	regulation of respiratory burst	7	1	0.02	1097	0.02317	1	1	1	Any process that modulates the rate frequency or extent of a phase of elevated metabolic activity, during which oxygen consumption increases; this leads to the production, by an NADH dependent system, of hydrogen peroxide (H2O2), superoxide anions and hydroxyl radicals	0.359166	0.359166	NOXA1, RPS19, DUSP10
GO:0060347	heart trabecula formation	7	1	0.02	59	0.02317	0.02317	1	1	The process of creating a trabecula in the heart. A trabecula is a tissue element in the form of a small beam, strut or rod	0.131303	0.131303	ADAMTS1	FKBP1A, EGLN1
GO:0060713	labyrinthine layer morphogenesis	7	1	0.02	1098	0.02317	1	1	1	The process in which the labyrinthine layer of the placenta is generated and organized	-0.00803709	-0.00803709	CYR61	ZFP36L1, NCOA1, LEF1
GO:0090154	positive regulation of sphingolipid bios...	7	1	0.02	60	0.02317	0.02317	1	1	Any process that increases the rate, frequency or extent of sphingolipid biosynthesis. Sphingolipid biosynthesis is the chemical reactions and pathways resulting in the formation of sphingolipids, any of a class of lipids containing the long-chain amine diol sphingosine or a closely related base (a sphingoid)	0.162736	0.162736	CYR61
GO:1902916	positive regulation of protein polyubiqu...	7	1	0.02	61	0.02317	0.02317	1	1	Any process that activates or increases the frequency, rate or extent of protein polyubiquitination	0.0873512	0.0873512	SKP2, XIAP	BIRC2
GO:2000304	positive regulation of ceramide biosynth...	7	1	0.02	62	0.02317	0.02317	1	1	Any process that activates or increases the frequency, rate or extent of ceramide biosynthetic process	0.162736	0.162736	CYR61
GO:0031401	positive regulation of protein modificat...	682	6	2.28	63	0.02319	0.02319	1	1	Any process that activates or increases the frequency, rate or extent of the covalent alteration of one or more amino acid residues within a protein	1.10457	-1.41806	LRP8, CARD9, PSMA6, FGFR3, SKP2, KIF14, CCNK, FZD8, PRKAR2B, CDK9, TIAM1, PRKAR1B, ANAPC7, UBC, CYR61, ADAM9, RASSF2, PRKCE, PDE8A, BRCA1, MADD, AKAP13, NDFIP2, KISS1, RTF1, KITLG, ANAPC2, SMAD4, MECP2, POMT2, TRIM5, CDK20, KRAS, IKBKG, MAGED1, TAB3, PRKAA1, SEMA7A, SPHK1, ANAPC11, MUC1, XIAP, CDK5R1, PAK2, MAP2K3, S1PR2, JARID2, C5AR1, MOB2, FLCN, CDH2, GSK3B, PTPA, CSPG4, TGFB1, CCDC22, RAPGEF1…	PSMD5, ARRDC3, TERF2IP, DVL3, PDGFD, NRK, PSMD12, PDCD10, GDF11, DYRK1A, ADNP, MAP2K4, PFN2, EIF2AK2, PRKACB, UBE2N, PPP2R3C, LYN, EED, DCUN1D5, PSMA1, ANAPC10, FAM129A, PDGFRA, PSMC6, PRNP, GPRC5B, TOPORS, CDC23, HSPH1, UBE3A, PSMA4, MNAT1, TAB2, CALM2, ARL6IP5, SDCBP, AC068234.1, DNAJC27, NKX3-1, PIBF1, CCNH, MAP3K20, FBXW7, EGFR, TTK, DCUN1D4, RAP1B, ISL1, RNF20, IQGAP3, RAB1A, CTF1, AREG, LAM…
GO:0051439	regulation of ubiquitin-protein ligase a...	71	2	0.24	64	0.02327	0.02327	1	1	A cell cycle process that modulates the frequency, rate or extent of ubiquitin ligase activity that contributes to the mitotic cell cycle	0.644813	-0.942602	PSMA6, ANAPC7, UBC, ANAPC2, ANAPC11, PSMB10, RPS27A, CDK1, PSMA7	PSMD5, PSMD12, PSMA1, ANAPC10, PSMC6, CDC23, PSMA4, PSMD14, CDC27, PSMD6, UBE2E1, PSMD7
GO:0006605	protein targeting	500	5	1.67	1099	0.02359	1	1	1	The process of targeting specific proteins to particular membrane-bounded subcellular organelles. Usually requires an organelle specific protein sequence motif	0.787302	-1.30592	IPO4, PBLD, RPSA, RPL31, SUFU, RPS10, RPS21, RPS19, KPNA6, TNPO2, DNAJC19, THRA, TOMM5, TSPO, SMAD4, DNLZ, RPL10, TOMM40L, SPHK1, AKR1C3, RAB8B, UBL5, CDK5R1, RPL41, RPS8, RPS29, NLRP3, NFKBIE, RPS12, VTI1A, CDH1, LEPROT, GSK3B, TGFB1, TOMM7, CCDC22, RPL21, RPL35A, MIEF1, NAGPA, LMNA, RPL37A, MAVS, BAP1, PPP3R1, RPLP2, MIEF2, SREBF1, PEX6, ATG4B, RPS27A, PACS2, CDK1, STIMATE, RPL34, IPO7, RPS23, …	UBE2D3, SRP19, RPL39, NOV, TNPO1, PIK3R1, HSP90AA1, RPL15, YWHAZ, BNIP3L, CSNK2A2, VPS36, PEX3, WDR75, TOMM20, NPEPPS, NCOA4, NUP35, NUP54, PRNP, AP3B1, AP3M1, KPNA3, PEX12, HNMT, SDCBP, ZFAND6, FBXW7, GOLGA7, EGFR, MFF, ZFYVE16, RAB6A, RPL36A, SRP72, NUP88, LAMP2, SRP54, SH3GLB1, RANBP6, SRP14, SYNJ2BP, PEX1, HSPA4, GREM1, SPCS2, RPL17-C18orf32, MED1, KPNA4, PEX2, CEP57, SRP9, ATG4A, RPL9, RPL17…
GO:0072594	establishment of protein localization to...	501	5	1.67	1100	0.02377	1	1	1	The directed movement of a protein to a specific location on or in an organelle. Encompasses establishment of localization in the membrane or lumen of a membrane-bounded organelle	0.79475	-1.42658	IPO4, PBLD, RPSA, RPL31, AP3D1, SUFU, RPS10, RPS21, NRAS, RPS19, KPNA6, WRAP53, TNPO2, DNAJC19, THRA, TOMM5, TSPO, SMAD4, SCRIB, DNLZ, RPL10, TOMM40L, SPHK1, AKR1C3, RAB8B, UBL5, RPL41, RPS8, RPS29, NLRP3, NFKBIE, TSPAN17, RPS12, VTI1A, CDH1, LEPROT, GSK3B, TGFB1, TOMM7, CCDC22, IFT122, MAPT, RPL21, RPL35A, NAGPA, LMNA, RPL37A, MAVS, BAP1, PPP3R1, RPLP2, SREBF1, PEX6, RPS27A, TSPAN10, CDK1, STIMA…	POT1, UBE2D3, SRP19, RPL39, NOV, TNPO1, PIK3R1, HSP90AA1, RPL15, YWHAZ, BNIP3L, CSNK2A2, VPS36, PEX3, WDR75, TOMM20, NPEPPS, NCOA4, NUP35, RAB11A, NUP54, AP3B1, AP3M1, KPNA3, HSPH1, PEX12, YWHAH, CALM2, HNMT, ZFAND6, DNAJA1, TCP1, FBXW7, EGFR, MFF, ZFYVE16, RAB6A, RPL36A, MAPK8, SRP72, NUP88, LAMP2, RAB10, SRP54, SH3GLB1, RANBP6, SRP14, PEX1, HSPA4, GREM1, SPCS2, RPL17-C18orf32, MED1, KPNA4, PEX2…
GO:0051437	positive regulation of ubiquitin-protein...	74	2	0.25	65	0.02513	0.02513	1	1	Any process that activates, maintains or increases the rate of ubiquitin ligase activity that contributes to the mitotic cell cycle	0.644813	-0.942602	PSMA6, ANAPC7, UBC, ANAPC2, ANAPC11, PSMB10, RPS27A, CDK1, PSMA7	PSMD5, PSMD12, PSMA1, ANAPC10, PSMC6, CDC23, PSMA4, PSMD14, CDC27, PSMD6, UBE2E1, PSMD7
GO:1904667	negative regulation of ubiquitin protein...	75	2	0.25	66	0.02577	0.02577	1	1		0.644813	-0.942602	PSMA6, ANAPC7, UBC, ANAPC2, ANAPC11, PSMB10, RPS27A, CDK1, PSMA7	PSMD5, PSMD12, PSMA1, ANAPC10, PSMC6, CDC23, PSMA4, PSMD14, CDC27, PSMD6, UBE2E1, PSMD7
GO:0042775	mitochondrial ATP synthesis coupled elec...	76	2	0.25	1101	0.02641	1	1	1	The transfer of electrons through a series of electron donors and acceptors, generating energy that is ultimately used for synthesis of ATP, as it occurs in the mitochondrial inner membrane or chloroplast thylakoid membrane	0.639147	-0.627974	NDUFA11, UQCRHL, NDUFA2, NDUFB2, MECP2, NDUFA9, UQCRQ, NDUFB6, COX10, CDK1, TAZ	UQCRB, NDUFS1, AP003108.2, PMPCB, NDUFA12, NDUFB1, SDHD, NDUFA6, DLD
GO:0051262	protein tetramerization	76	2	0.25	67	0.02641	0.02641	1	1	The formation of a protein tetramer, a macromolecular structure consisting of four noncovalently associated identical or nonidentical subunits	0.572655	-0.60317	SOD2, DCTPP1, RPS19, SYT11, SAMHD1, APIP, HMGCR, SHMT2, PEX5, ACACB, CRTC1	DNM1L, NUP54, ALDH5A1, SRR, HPRT1, USP16, TRPV1
GO:0090288	negative regulation of cellular response...	76	2	0.25	68	0.02641	0.02641	1	1	Any process that decreases the rate, frequency, or extent of a change in state or activity of a cell (in terms of movement, secretion, enzyme production, gene expression, etc.) as a result of a growth factor stimulus	0.692015	-0.612457	SKIL, PBLD, UBC, LTBP1, NOTCH1, FAM129B, TGFB1, CASK, HHEX, NBL1, RPS27A, LEMD3, VASN, HSPA5, CD109, PTPN1, TGFBR1	SMURF2, STRAP, TRIM33, GREM1, DKK1, SPRY2, SMAD2, WNT5A, TWSG1, NEDD4
GO:0000447	endonucleolytic cleavage in ITS1 to sepa...	8	1	0.03	69	0.02644	0.02644	1	1	Endonucleolytic cleavage between the SSU-rRNA and the 5.8S rRNA of an rRNA molecule originally produced as a tricistronic rRNA transcript that contained the Small SubUnit (SSU) rRNA, the 5.8S rRNA, and the Large SubUnit (LSU) rRNA, in that order, from 5' to 3' along the primary transcript	0.325592	0.325592	RPSA, RPS21, FCF1
GO:0030252	growth hormone secretion	8	1	0.03	70	0.02644	0.02644	1	1	The regulated release of growth hormone from secretory granules into the blood	0.131293	0.131293	KISS1, SERP1	RAB1A
GO:0030728	ovulation	8	1	0.03	71	0.02644	0.02644	1	1	The release of a mature ovum/oocyte from an ovary	0.231887	0.231887	ADAMTS1, FOXO3, IMMP2L
GO:0033148	positive regulation of intracellular est...	8	1	0.03	72	0.02644	0.02644	1	1	Any process that activates or increases the frequency, rate or extent of the activity of an intracellular estrogen receptor signaling pathway	0.0163583	0.0163583	SKP2, KMT2D	DDX5, DDX17, MED1
GO:0045713	low-density lipoprotein particle recepto...	8	1	0.03	1102	0.02644	1	1	1	The chemical reactions and pathways resulting in the formation of low-density lipoprotein receptors, cell surface proteins that mediate the endocytosis of low-density lipoprotein particles by cells	0.0371514	0.0371514	CNPY2	AC068234.1, HNRNPK
GO:0045714	regulation of low-density lipoprotein pa...	8	1	0.03	1103	0.02644	1	1	1	Any process that modulates the frequency, rate or extent of the chemical reactions and pathways resulting in the formation of low-density lipoprotein particle receptors	0.0371514	0.0371514	CNPY2	AC068234.1, HNRNPK
GO:0042773	ATP synthesis coupled electron transport	77	2	0.26	1104	0.02706	1	1	1	The transfer of electrons through a series of electron donors and acceptors, generating energy that is ultimately used for synthesis of ATP	0.639147	-0.627974	NDUFA11, UQCRHL, NDUFA2, NDUFB2, MECP2, NDUFA9, UQCRQ, NDUFB6, COX10, CDK1, TAZ	UQCRB, NDUFS1, AP003108.2, PMPCB, NDUFA12, NDUFB1, SDHD, NDUFA6, DLD
GO:0030260	entry into host cell	78	2	0.26	73	0.02771	0.02771	1	1	The invasion by an organism of a cell of its host organism. The host is defined as the larger of the organisms involved in a symbiotic interaction	0.618367	-0.968745	RPSA, UBC, CBL, LDLR, TRIM5, P4HB, SIVA1, CDH1, RPS27A, HYAL2	ITGB1, XPR1, SNX3, WWP1, KPNA3, AC068234.1, ZNF639, FUCA2, CBLL1, MET, AXL, PPIA, TRIM21
GO:0044409	entry into host	78	2	0.26	74	0.02771	0.02771	1	1	Penetration by an organism into the body, tissues, or cells of the host organism. The host is defined as the larger of the organisms involved in a symbiotic interaction	0.618367	-0.968745	RPSA, UBC, CBL, LDLR, TRIM5, P4HB, SIVA1, CDH1, RPS27A, HYAL2	ITGB1, XPR1, SNX3, WWP1, KPNA3, AC068234.1, ZNF639, FUCA2, CBLL1, MET, AXL, PPIA, TRIM21
GO:0051806	entry into cell of other organism involv...	78	2	0.26	75	0.02771	0.02771	1	1	The invasion by an organism of a cell of a second organism, where the two organisms are in a symbiotic interaction	0.618367	-0.968745	RPSA, UBC, CBL, LDLR, TRIM5, P4HB, SIVA1, CDH1, RPS27A, HYAL2	ITGB1, XPR1, SNX3, WWP1, KPNA3, AC068234.1, ZNF639, FUCA2, CBLL1, MET, AXL, PPIA, TRIM21
GO:0051828	entry into other organism involved in sy...	78	2	0.26	76	0.02771	0.02771	1	1	Penetration by an organism into the body, tissues, or cells of a second organism, where the two organisms are in a symbiotic interaction	0.618367	-0.968745	RPSA, UBC, CBL, LDLR, TRIM5, P4HB, SIVA1, CDH1, RPS27A, HYAL2	ITGB1, XPR1, SNX3, WWP1, KPNA3, AC068234.1, ZNF639, FUCA2, CBLL1, MET, AXL, PPIA, TRIM21
GO:0033365	protein localization to organelle	711	6	2.38	957	0.02783	0.83557	1	1	A process in which a protein is transported to, or maintained in, a location within an organelle	0.830509	-1.6195	IPO4, PBLD, RPSA, TAF3, TUB, RPL31, LAMTOR4, HOOK3, AP3D1, SUFU, RPS10, RPS21, NRAS, TAF8, RPS19, KPNA6, WRAP53, CRIPT, SYT11, TNPO2, DNAJC19, THRA, TOMM5, TSPO, SMAD4, SCRIB, DNLZ, RPL10, KIAA0753, TOMM40L, SPHK1, SZT2, AKR1C3, CROCC, RAB8B, UBL5, RPL41, RPS8, ESCO2, RPS29, NLRP3, PACSIN2, NFKBIE, TSPAN17, RPS12, VTI1A, FLCN, CDH1, LEPROT, GSK3B, TGFB1, TOMM7, CCDC22, IFT122, MAPT, RPL21, KLHL21…	POT1, NEDD1, UBE2D3, TERF2IP, SRP19, MTBP, RPL39, NOV, TNPO1, WDR35, PIK3R1, SIN3A, CENPQ, HSP90AA1, RPL15, YWHAZ, BNIP3L, DNM1L, CSNK2A2, KDELR3, VPS36, PEX3, RTN4, WDR75, TOMM20, NPEPPS, SUMO1, NCOA4, NUP35, RAB11A, NUP54, AP3B1, TOPORS, AP3M1, KPNA3, HSPH1, PEX12, YWHAH, CALM2, HNMT, ZFAND6, PLRG1, BBIP1, PIBF1, DNAJA1, TCP1, FBXW7, CEP68, EGFR, TTK, MFF, SH3BP4, ZFYVE16, RAB6A, VAPA, RPL36A, …
GO:0043933	macromolecular complex subunit organizat...	1350	9	4.51	599	0.02799	0.34386	1	1	Any process in which macromolecules aggregate, disaggregate, or are modified, resulting in the formation, disassembly, or alteration of a macromolecular complex	1.03761	-1.59705	KAT6A, IPO4, NUFIP1, MZT1, KIF14, SNAP29, ARHGAP18, H3F3A, VILL, GTF2H3, SOD2, CLGN, PNPT1, NDUFA11, DNAJC6, RPSA, UBC, TAF9B, PREX1, SPIRE2, KCTD7, MTPN, LOX, BIN1, FCHSD2, RPA3, COBLL1, TAF4, PRKCE, WASF3, HIST1H2BJ, RPS10, NDUFA2, PET100, DCTPP1, MRPL54, MYOM2, RPS19, DDX20, ARPC1B, NDUFB2, DGKD, SYT11, SAR1B, SLAIN2, ARFIP1, THRA, ARMC4, SPECC1L, DAPK3, PDCL, SMAD4, MDM4, MECP2, STXBP3, SUPT6…	CETN2, PSMD5, DNAJC28, HAT1, SLU7, SRP19, DVL3, MRPS30, GSPT1, COL11A1, SEC31A, RPF1, TRAPPC6B, BRIX1, CREB1, ARPC5, ITGB3BP, CENPQ, PFN2, ZBTB1, GSPT2, HSP90AA1, UQCRB, EIF2AK2, GTF2B, PTGES3, DNM1L, MRPL3, SNX2, NAP1L1, RASA1, LPXN, RTN4, MRPL1, LUM, TOMM20, EIF2A, SUMO1, COL3A1, NPM1, MAT2A, NCK1, IKZF4, VTA1, NUP35, PUM2, TAF9, MBD2, PLEKHH2, PSMC6, NUP54, GTF2F2, PRNP, PEX11B, PSMG1, GCH1, C…
GO:1904668	positive regulation of ubiquitin protein...	79	2	0.26	77	0.02838	0.02838	1	1		0.648692	-0.957015	PSMA6, ANAPC7, UBC, ANAPC2, ANAPC11, PSMB10, RPS27A, CDK1, PSMA7, GORASP1	PSMD5, PSMD12, PSMA1, ANAPC10, PSMC6, CDC23, PSMA4, RAB1A, PSMD14, CDC27, PSMD6, UBE2E1, PSMD7
GO:0051240	positive regulation of multicellular org...	716	6	2.39	619	0.02869	0.36182	1	1	Any process that activates or increases the frequency, rate or extent of an organismal process, any of the processes pertinent to the function of an organism above the cellular level; includes the integrated processes of tissues and organs	1.0513	-1.25533	LRP8, CARD9, EXOSC6, SKIL, POLR3K, EEF2K, TOB2, ARHGAP35, CDK9, TIAM1, TRPV2, TBX2, CYR61, ADAM9, DOCK1, MTPN, BIN1, CHUK, SLC22A5, PRKCE, PPM1F, AP3D1, NCOA3, WASF3, BRCA1, EGR1, SMAD5, KISS1, RPS19, PLXNB1, NOTCH1, RNF135, UFL1, KITLG, ATOH8, TSPO, ANAPC2, ZNF703, SMAD4, MECP2, ADGRL1, MAGED1, PRKAA1, SEMA7A, SPHK1, FAM129B, TENM4, POLR3G, RAB8B, HILPDA, NLRP3, ATAD5, RNF10, CTTN, GATA2, GDPD5,…	CD58, PDGFD, NFE2L2, CREB1, PIK3R1, HPSE, ADNP, GPAM, ZBTB1, EIF2AK2, DNM1L, LY96, TMF1, PPP2R3C, LYN, AKIRIN2, RTN4, LUM, MSH2, SNX3, ATP11C, SMURF2, NCK1, PUM2, RAB11A, TBC1D23, AP3B1, GPRC5B, GCH1, CADM1, MAN2A1, TCF12, BASP1, DHX36, ATP6AP2, SDCBP, AC068234.1, MKL2, CAPRIN1, NKX3-1, PIBF1, SLC1A1, MSH6, EGFR, GLMN, EXOSC3, SNX4, SMAP1, ATG5, ISL1, MTDH, IQGAP3, TFAP2A, SPP1, OXTR, ZC3HAV1, SS…
GO:0000086	G2/M transition of mitotic cell cycle	201	3	0.67	78	0.02881	0.02881	1	1	The mitotic cell cycle transition by which a cell in G2 commits to M phase. The process begins when the kinase activity of M cyclin/CDK complex reaches a threshold high enough for the cell cycle to proceed. This is accomplished by activating a positive feedback loop that results in the accumulation of unphosphorylated and active M cyclin/CDK complex	0.80731	-1.39922	PSMA6, SKP2, KIF14, PRKAR2B, UBC, MECP2, CEP135, FOXM1, PSMB10, PKMYT1, CHEK2, CCP110, RPS27A, CDK1, HUS1, FOXO4, PSMA7, MELK, SSNA1, RCC2, WNT10B, NEK2	NEDD1, CETN2, PSMD5, RNASEH2B, PSMD12, SIN3A, HSP90AA1, SYF2, HMMR, PSMA1, TOPBP1, HAUS3, PSMC6, RAB11A, PSMA4, MNAT1, CCNH, ARPP19, USP47, PPP2R2A, CDC7, NDE1, NAE1, PSMD14, CDK6, TAOK3, CEP63, CEP57, PSMD6, PCM1, CLSPN, CDKN2B, ODF2, FGFR1OP, RAB8A, AKAP9, CNTRL, CCNA2, HMGA2, RAD17, PSMD7, CCNB2, RAD51C
GO:0009143	nucleoside triphosphate catabolic proces...	9	1	0.03	1105	0.02969	1	1	1	The chemical reactions and pathways resulting in the breakdown of a nucleoside triphosphate, a compound consisting of a nucleobase linked to a deoxyribose or ribose sugar esterified with triphosphate on the sugar	0.118227	0.118227	DCTPP1, ITPA, SAMHD1	SMPDL3A
GO:0010870	positive regulation of receptor biosynth...	9	1	0.03	1106	0.02969	1	1	1	Any process that increases the frequency or rate of receptor biosynthesis. Receptor biosynthesis is the collection of chemical reactions and pathways resulting in the formation of a receptor molecule, a macromolecule that undergoes combination with a hormone, neurotransmitter, drug or intracellular messenger to initiate a change in cell function	0.11844	0.11844	CNPY2, HIF1A	HDAC2, HNRNPK
GO:0060413	atrial septum morphogenesis	9	1	0.03	79	0.02969	0.02969	1	1	The developmental process in which atrial septum is generated and organized. The atrial septum separates the upper chambers (the atria) of the heart from one another	-0.125333	-0.125333	CYR61	ISL1, NOTCH2, TGFB2
GO:0060669	embryonic placenta morphogenesis	9	1	0.03	1107	0.02969	1	1	1	The process in which the embryonic placenta is generated and organized	0.031002	0.031002	CYR61	ZFP36L1, NCOA1, LEF1
GO:0051444	negative regulation of ubiquitin-protein...	81	2	0.27	80	0.02972	0.02972	1	1	Any process that stops, prevents, or reduces the frequency, rate or extent of ubiquitin transferase activity	0.644813	-0.942602	PSMA6, ANAPC7, UBC, ANAPC2, ANAPC11, PSMB10, RPS27A, CDK1, PSMA7	PSMD5, PSMD12, PSMA1, ANAPC10, PSMC6, CDC23, PSMA4, PSMD14, CDC27, PSMD6, UBE2E1, PSMD7
GO:0033108	mitochondrial respiratory chain complex ...	82	2	0.27	81	0.0304	0.0304	1	1	The aggregation, arrangement and bonding together of a set of components to form a mitochondrial respiratory chain complex	0.610909	-0.661209	NDUFA11, NDUFA2, PET100, NDUFB2, UQCC2, NDUFA9, COX14, NDUFB6, TAZ, SURF1, IMMP2L, NDUFAF4	UQCRB, NDUFS1, AP003108.2, NDUFA12, NDUFAF6, NUBPL, SDHAF3, NDUFB1, COX20, NDUFA6, NDUFAF7
GO:2000060	positive regulation of protein ubiquitin...	82	2	0.27	82	0.0304	0.0304	1	1	Any process that activates or increases the frequency, rate or extent of protein ubiquitination involved in ubiquitin-dependent protein catabolic process	0.659726	-0.963805	PSMA6, ANAPC7, UBC, ANAPC2, ANAPC11, CCDC22, PSMB10, RPS27A, CDK1, PSMA7	PSMD5, PSMD12, PSMA1, ANAPC10, PSMC6, CDC23, PSMA4, FBXW7, PSMD14, CDC27, PSMD6, UBE2E1, PSMD7
GO:0003205	cardiac chamber development	83	2	0.28	83	0.03108	0.03108	1	1	The progression of a cardiac chamber over time, from its formation to the mature structure. A cardiac chamber is an enclosed cavity within the heart	0.867576	-0.819545	ADAMTS1, TMEM65, TBX2, CYR61, LTBP1, SUFU, DCTN5, NOTCH1, SMAD4, TGFB1, SNX17, HIF1A, TBX3, TGFBR1	DVL3, COL11A1, CPE, ISL1, NOTCH2, FKBP1A, LMO4, MED1, ID2, RBPJ, WNT5A, RARB, BMP4, PKP2, TGFB2, SEMA3C, EGLN1, MYH10
GO:0044839	cell cycle G2/M phase transition	209	3	0.7	84	0.03184	0.03184	1	1	The cell cycle process by which a cell in G2 phase commits to M phase	0.80731	-1.39922	PSMA6, SKP2, KIF14, PRKAR2B, UBC, MECP2, CEP135, FOXM1, PSMB10, PKMYT1, CHEK2, CCP110, RPS27A, CDK1, HUS1, FOXO4, PSMA7, MELK, SSNA1, RCC2, WNT10B, NEK2	NEDD1, CETN2, PSMD5, RNASEH2B, PSMD12, SIN3A, HSP90AA1, SYF2, HMMR, PSMA1, NPM1, TOPBP1, HAUS3, PSMC6, RAB11A, PSMA4, MNAT1, CCNH, ARPP19, USP47, PPP2R2A, CDC7, NDE1, NAE1, PSMD14, CDK6, TAOK3, CEP63, CEP57, PSMD6, PCM1, CLSPN, CDKN2B, ODF2, FGFR1OP, RAB8A, AKAP9, CNTRL, CCNA2, HMGA2, RAD17, PSMD7, CCNB2, RAD51C
GO:0065003	macromolecular complex assembly	1158	8	3.87	674	0.03232	0.42795	1	1	The aggregation, arrangement and bonding together of a set of macromolecules to form a complex	1.03761	-1.52247	KAT6A, IPO4, NUFIP1, MZT1, KIF14, SNAP29, ARHGAP18, H3F3A, VILL, GTF2H3, SOD2, CLGN, PNPT1, NDUFA11, RPSA, UBC, TAF9B, PREX1, SPIRE2, KCTD7, MTPN, BIN1, FCHSD2, RPA3, COBLL1, TAF4, PRKCE, WASF3, HIST1H2BJ, RPS10, NDUFA2, PET100, DCTPP1, MYOM2, RPS19, DDX20, ARPC1B, NDUFB2, DGKD, SYT11, SAR1B, SLAIN2, ARFIP1, THRA, ARMC4, PDCL, SMAD4, MDM4, MECP2, STXBP3, SEPT9, EDC3, RPL10, UQCC2, PRKAA1, C1QTNF6…	CETN2, PSMD5, DNAJC28, HAT1, SLU7, SRP19, SEC31A, RPF1, TRAPPC6B, BRIX1, CREB1, ARPC5, ITGB3BP, CENPQ, PFN2, ZBTB1, HSP90AA1, UQCRB, EIF2AK2, GTF2B, PTGES3, DNM1L, SNX2, NAP1L1, RASA1, LPXN, RTN4, TOMM20, EIF2A, SUMO1, NPM1, MAT2A, NCK1, IKZF4, PUM2, TAF9, MBD2, PSMC6, NUP54, GTF2F2, PRNP, PEX11B, PSMG1, GCH1, CRBN, SBDS, KPNA3, ATPAF1, NDUFS1, SEPT11, CAPZA1, TMOD1, STRAP, WIPF1, NIFK, CAPZA2, M…
GO:1904666	regulation of ubiquitin protein ligase a...	85	2	0.28	85	0.03248	0.03248	1	1		0.648692	-0.957015	PSMA6, ANAPC7, UBC, ANAPC2, ANAPC11, PSMB10, RPS27A, CDK1, PSMA7, GORASP1	PSMD5, PSMD12, PSMA1, ANAPC10, PSMC6, CDC23, PSMA4, RAB1A, PSMD14, CDC27, PSMD6, UBE2E1, PSMD7
GO:0031396	regulation of protein ubiquitination	211	3	0.71	86	0.03262	0.03262	1	1	Any process that modulates the frequency, rate or extent of the addition of ubiquitin groups to a protein	0.851622	-1.16715	PSMA6, SKP2, CDK9, ANAPC7, UBC, PRKCE, SUFU, BRCA1, UBXN2A, NDFIP2, UFL1, TSPO, ANAPC2, SPHK1, ANAPC11, XIAP, ISG15, CCDC22, PSMB10, BMI1, RPS27A, NDFIP1, CDK1, TICAM1, RASSF5, HSPA5, PSMA7, GORASP1, TGFBR1	PSMD5, ARRDC3, PSMD12, HSP90AA1, UBE2N, DCUN1D5, PSMA1, ANAPC10, PSMC6, TOPORS, CDC23, UBE3A, PSMA4, DNAJA1, FBXW7, GLMN, DCUN1D4, ATG5, RNF20, RAB1A, DERL1, FKBP1A, PSMD14, TRIP12, CDC27, PSMD6, UBE2E1, TNFAIP3, UBR5, RIPK2, PSMD7, PTTG1IP, BIRC2, GNL3L, FYN
GO:0003283	atrial septum development	10	1	0.03	87	0.03294	0.03294	1	1	The progression of the atrial septum over time, from its initial formation to the mature structure	-0.132956	-0.132956	CYR61	ISL1, NOTCH2, TGFB2
GO:0009223	pyrimidine deoxyribonucleotide catabolic...	10	1	0.03	1108	0.03294	1	1	1	The chemical reactions and pathways resulting in the breakdown of a pyrimidine deoxyribonucleotide, a compound consisting of nucleoside (a pyrimidine base linked to a deoxyribose sugar) esterified with a phosphate group at either the 3' or 5'-hydroxyl group of the sugar	0.0223813	0.0223813	DCTPP1, NTHL1	UNG, MBD4, OGG1
GO:0031125	rRNA 3'-end processing	10	1	0.03	1109	0.03294	1	1	1	Any process involved in forming the mature 3' end of an rRNA molecule	0.205085	0.205085	EXOSC6, RPSA, RPS21	EXOSC3
GO:0060561	apoptotic process involved in morphogene...	10	1	0.03	1110	0.03294	1	1	1	Any apoptotic process that contributes to the shaping of an anatomical structure	0.214568	0.214568	CYR61, NOTCH1, SCRIB, VDR, BAK1	TGFB2, LEF1
GO:0009141	nucleoside triphosphate metabolic proces...	212	3	0.71	1111	0.03301	1	1	1	The chemical reactions and pathways involving a nucleoside triphosphate, a compound consisting of a nucleobase linked to a deoxyribose or ribose sugar esterified with triphosphate on the sugar	0.709107	-0.984715	NDUFA11, UQCRHL, NDUFA2, DCTPP1, NDUFB2, NME3, FIGNL1, PFKFB4, TSPO, MECP2, UQCC2, PRKAA1, NDUFA9, IMPDH1, ITPA, FLCN, UQCRQ, TGFB1, NDUFB6, UCK1, SAMHD1, COX10, SIRT6, PARG, CDK1, HIF1A, OGDH, TAZ, SURF1	ATP5F1EP2, RHOQ, UQCRB, DNM1L, MSH2, NDUFS1, AP003108.2, ATP5F1C, MOCS2, MBIP, CMPK1, PMPCB, AK3, NDUFA12, RRM2B, TBPL1, BPGM, SLC25A13, NFS1, HSPA8, NDUFB1, CTPS1, GAPDH, SMPDL3A, SDHD, NDUFA6, AK9, NME7, NDUFAF7, TYMS, NMNAT1, DLD
GO:0051247	positive regulation of protein metabolic...	946	7	3.16	195	0.03304	0.07706	1	1	Any process that activates or increases the frequency, rate or extent of the chemical reactions and pathways involving a protein	1.1442	-1.44169	LRP8, CARD9, PSMA6, FGFR3, SKP2, EGLN2, CNPY2, KIF14, CCNK, FZD8, PRKAR2B, PIDD1, CDK9, TIAM1, PXYLP1, PRKAR1B, ANAPC7, UBC, CYR61, ADAM9, MTPN, RASSF2, PRKCE, IFI27, SOCS4, PPM1F, PDE8A, BRCA1, PCOLCE2, EGR1, MADD, AKAP13, NDFIP2, KISS1, RNF166, RTF1, KITLG, ANAPC2, SMAD4, MECP2, POMT2, LARP4, TRIM5, CDK20, KRAS, IKBKG, MAGED1, UQCC2, TAB3, PRKAA1, SEMA7A, SPHK1, ANAPC11, MUC1, XIAP, CDK5R1, PAK…	PSMD5, ARRDC3, TERF2IP, DVL3, PDGFD, NFE2L2, EIF3E, NRK, PSMD12, PDCD10, WDR35, PAIP1, GDF11, DYRK1A, ADNP, MAP2K4, PFN2, EIF2AK2, PRKACB, TMTC3, UBE2N, PPP2R3C, LYN, AKIRIN2, EED, DCUN1D5, PSMA1, ANAPC10, FAM129A, SUMO1, NPM1, NCK1, PDGFRA, PSMC6, PRNP, GPRC5B, TOPORS, CDC23, HSPH1, UBE3A, PSMA4, MNAT1, TAB2, CALM2, ARL6IP5, SDCBP, AC068234.1, DNAJC27, NKX3-1, PIBF1, CCNH, MAP3K20, BBS7, FBXW7, …
GO:0001890	placenta development	86	2	0.29	469	0.03318	0.23656	1	1	The process whose specific outcome is the progression of the placenta over time, from its formation to the mature structure. The placenta is an organ of metabolic interchange between fetus and mother, partly of embryonic origin and partly of maternal origin	0.696154	-0.737671	ITGB8, CYR61, BIRC6, ETNK2, KISS1, PLCD1, GATA2, CTSV, VDR, HSF1, HIF1A, MAP2K1	NRK, STC2, EGFR, BPTF, SPP1, ALKBH1, SP3, STK3, MED1, RBPJ, GJA1, ZFP36L1, FBXW8, STK4, PKD2, FOSL1, EGLN1, NCOA1, LEF1, BIRC2
GO:0008285	negative regulation of cell proliferatio...	375	4	1.25	88	0.03483	0.03483	1	1	Any process that stops, prevents or reduces the rate or extent of cell proliferation	0.961742	-1.22457	ADAMTS1, CERS2, SSTR1, TAX1BP3, TOB2, SOD2, PBLD, IGFBP7, IGFBP5, KISS1, PLXNB1, DDX20, NOTCH1, ATOH8, TSPO, SMAD4, MDM4, MAGED1, FAM129B, PBRM1, RNF10, GATA2, TFAP4, JARID2, FLCN, CTSV, TGFB1, IFT122, RAPGEF1, CASK, LMNA, BAP1, HRAS, PTPRJ, ING4, NDFIP1, SIRT6, VDR, HSF1, RASSF5, RBM5, FOXO4, CTNNBIP1, BRCA2, ETV4, MAP2K1, CD109, JUN, CASP3, BAK1, TRIM32, WNT10B, TGFBR1, CSK	MTBP, NOV, NRK, PDCD10, GDF11, MARCH7, EIF2AK2, STAT1, LYN, IFT74, KRIT1, EEF1E1, NPM1, PRNP, C18orf54, MCC, PPP2R5C, STRAP, NKX3-1, BCHE, HIST1H2AC, FBXW7, GLMN, SH3BP4, TFAP2A, PRKRA, KIFAP3, PLPP1, COPS8, PTPRK, RBBP4, SYNJ2BP, NOTCH2, SKAP2, RC3H1, GREM1, STK3, RAPGEF2, CDK6, KAT2B, MED1, PEX2, ASPH, SPRY2, CUL2, SMAD2, ID2, VEGFC, IL1B, RBPJ, CDKN2B, GJA1, WNT5A, CUL5, ZEB1, RARB, BMP4, TNFA…
GO:0022904	respiratory electron transport chain	89	2	0.3	1112	0.03533	1	1	1	A process in which a series of electron carriers operate together to transfer electrons from donors such as NADH and FADH2 to any of several different terminal electron acceptors to generate a transmembrane electrochemical gradient	0.686711	-0.692539	D2HGDH, NDUFA11, UQCRHL, NDUFA2, NDUFB2, MECP2, NDUFA9, UQCRQ, NDUFB6, COX10, CDK1, TAZ, IMMP2L	UQCRB, NDUFS1, AP003108.2, ALDH5A1, PMPCB, NDUFA12, ETFDH, SLC25A13, NDUFB1, SDHD, NDUFA6, DLD
GO:0006119	oxidative phosphorylation	90	2	0.3	1113	0.03606	1	1	1	The phosphorylation of ADP to ATP that accompanies the oxidation of a metabolite through the operation of the respiratory chain. Oxidation of compounds establishes a proton gradient across the membrane, providing the energy for ATP synthesis	0.653625	-0.725681	NDUFA11, UQCRHL, NDUFA2, NDUFB2, MECP2, UQCC2, NDUFA9, UQCRQ, NDUFB6, COX10, CDK1, TAZ, SURF1	UQCRB, MSH2, NDUFS1, AP003108.2, ATP5F1C, PMPCB, NDUFA12, NDUFB1, SDHD, NDUFA6, DLD
GO:0022900	electron transport chain	90	2	0.3	1114	0.03606	1	1	1	A process in which a series of electron carriers operate together to transfer electrons from donors to any of several different terminal electron acceptors to generate a transmembrane electrochemical gradient	0.686711	-0.692539	D2HGDH, NDUFA11, UQCRHL, NDUFA2, NDUFB2, MECP2, NDUFA9, UQCRQ, NDUFB6, COX10, CDK1, TAZ, IMMP2L	UQCRB, NDUFS1, AP003108.2, ALDH5A1, PMPCB, NDUFA12, ETFDH, SLC25A13, NDUFB1, SDHD, NDUFA6, DLD
GO:0030330	DNA damage response, signal transduction...	90	2	0.3	89	0.03606	0.03606	1	1	A cascade of processes induced by the cell cycle regulator phosphoprotein p53, or an equivalent protein, in response to the detection of DNA damage	0.639796	-0.771766	PIDD1, UBC, BRCA1, MDM4, FOXM1, MUC1, TFAP4, RBL2, FOXO3, CHEK2, ING4, RPS27A, CDK1, BRCA2, TNKS1BP1	DYRK1A, PCNA, EEF1E1, NPM1, DDX5, CASP2, CNOT2, TRIAP1, CNOT1, PTTG1IP, CNOT8, CNOT10
GO:0003181	atrioventricular valve morphogenesis	11	1	0.04	90	0.03618	0.03618	1	1	The process in which the structure of the atrioventricular valve is generated and organized	0.261766	0.138447	CYR61, NOTCH1, SMAD4, EFNA1	TGFB2
GO:0006244	pyrimidine nucleotide catabolic process	11	1	0.04	1115	0.03618	1	1	1	The chemical reactions and pathways resulting in the breakdown of a pyrimidine nucleotide, a compound consisting of nucleoside (a pyrimidine base linked to a deoxyribose or ribose sugar) esterified with a phosphate group at either the 3' or 5'-hydroxyl group of the sugar	0.103828	-0.0271794	DCTPP1, NTHL1	UNG, MBD4, OGG1
GO:0032799	low-density lipoprotein receptor particl...	11	1	0.04	1116	0.03618	1	1	1	The chemical reactions and pathways involving low-density lipoprotein receptors	0.121114	-0.0656887	CNPY2	AC068234.1, HNRNPK
GO:0048643	positive regulation of skeletal muscle t...	11	1	0.04	1117	0.03618	1	1	1	Any process that activates, maintains or increases the rate of skeletal muscle tissue development	0.24494	0.124601	PRKAA1, FAM129B, HMGCR	RPS6KB1
GO:0051482	positive regulation of cytosolic calcium...	11	1	0.04	91	0.03618	0.03618	1	1	Any process that increases the concentration of calcium ions in the cytosol that occurs as part of a PLC-activating G-protein coupled receptor signaling pathway. G-protein-activated PLC hydrolyses phosphatidylinositol-bisphosphate (PIP2) to release diacylglycerol (DAG) and inositol trisphosphate (IP3). IP3 then binds to calcium release channels in the endoplasmic reticulum (ER) to trigger calcium…	0.201013	0.0602737	KISS1, GPR4, GPR17	AGTR1, F2RL2
GO:0060716	labyrinthine layer blood vessel developm...	11	1	0.04	92	0.03618	0.03618	1	1	The process whose specific outcome is the progression of a blood vessel of the labyrinthine layer of the placenta over time, from its formation to the mature structure. The embryonic vessels grow through the layer to come in close contact with the maternal blood supply	0.146815	0.0143581	CYR61, PLCD1	RBPJ, FBXW8
GO:0090136	epithelial cell-cell adhesion	11	1	0.04	93	0.03618	0.03618	1	1	The attachment of an epithelial cell to another epithelial cell via adhesion molecules	-0.102632	-0.308748	KIFC3	NOV, VCL, SERPINB8, PLEKHA7, CYP1B1
GO:0090190	positive regulation of branching involve...	11	1	0.04	94	0.03618	0.03618	1	1	Any process that increases the rate, frequency or extent of branching involved in ureteric bud morphogenesis, the process in which the branching structure of the ureteric bud is generated and organized. The ureteric bud is an epithelial tube that grows out from the metanephric duct. The bud elongates and branches to give rise to the ureter and kidney collecting tubules	0.157042	0.0328279	MAGED1, TGFB1, LGR4	GREM1
GO:1902914	regulation of protein polyubiquitination	11	1	0.04	95	0.03618	0.03618	1	1	Any process that modulates the frequency, rate or extent of protein polyubiquitination	0.0256094	-0.15148	SKP2, XIAP	TRIP12, UBR5, BIRC2
GO:2000781	positive regulation of double-strand bre...	11	1	0.04	96	0.03618	0.03618	1	1	Any process that activates or increases the frequency, rate or extent of double-strand break repair	-0.0386755	-0.159383	FOXM1	SETMAR, SLF1
GO:0043065	positive regulation of apoptotic process	385	4	1.29	97	0.03783	0.03783	1	1	Any process that activates or increases the frequency, rate or extent of cell death by apoptotic process	0.834037	-1.26905	SKIL, PIDD1, TIAM1, CDK19, UBC, PREX1, CYR61, BIN1, TRIO, RASSF2, IFI27, PPM1F, OSGIN1, AKAP13, VAV2, DDX20, NOTCH1, TSPO, DAPK3, SCRIB, MAGED1, HTT, AKR1C3, CDK5R1, PAK2, NLRP3, TFAP4, TOP2A, FLCN, GSK3B, PTPA, TGFB1, MAPT, FOXO3, PPP3R1, CHEK2, ING4, RPS27A, TRADD, FNIP1, CAPN10, UTP11, IFIT2, VDR, HMGCR, HSF1, PDGFRB, ITM2C, TIMP3, ATF3, BCL2L1, RBM5, CYLD, APBB1, ARHGEF4, ARHGEF19, HYAL2, MAP…	ITGB1, TIAM2, WDR35, CREB1, ITGB3BP, MAP2K4, YWHAZ, BNIP3L, DNM1L, LYN, EEF1E1, NCK1, PRNP, YWHAH, ARL6IP5, NKX3-1, MAP3K20, SOS2, DNAJA1, ING3, FBXW7, MFF, LATS2, MAPK8, GNA13, TFAP2A, PRKRA, ARHGEF12, SERINC3, STK3, PIK3CB, CASP2, RAPGEF2, WNT5A, RARB, BMP4, BCLAF1, PPID, CTSZ, NCSTN, RIPK2, CYP1B1, NF1, STK4, HMGA2, TGFB2, ECT2, FOSL1, SRPK2, TRPV1, ROBO1, CAMK2D, NCOA1, ARHGEF26, ITGA6, FADD,…
GO:0043068	positive regulation of programmed cell d...	388	4	1.3	98	0.03876	0.03876	1	1	Any process that activates or increases the frequency, rate or extent of programmed cell death, cell death resulting from activation of endogenous cellular processes	0.834037	-1.26905	SKIL, PIDD1, TIAM1, CDK19, UBC, PREX1, CYR61, BIN1, TRIO, RASSF2, IFI27, PPM1F, OSGIN1, AKAP13, VAV2, DDX20, NOTCH1, TSPO, DAPK3, SCRIB, MAGED1, HTT, AKR1C3, CDK5R1, PAK2, NLRP3, TFAP4, TOP2A, FLCN, GSK3B, PTPA, TGFB1, MAPT, FOXO3, PPP3R1, CHEK2, ING4, RPS27A, TRADD, FNIP1, CAPN10, UTP11, IFIT2, VDR, HMGCR, HSF1, PDGFRB, ITM2C, TIMP3, ATF3, BCL2L1, RBM5, CYLD, APBB1, ARHGEF4, ARHGEF19, HYAL2, MAP…	ITGB1, TIAM2, WDR35, CREB1, ITGB3BP, MAP2K4, YWHAZ, BNIP3L, DNM1L, LYN, EEF1E1, NCK1, PRNP, YWHAH, ARL6IP5, NKX3-1, MAP3K20, SOS2, DNAJA1, ING3, FBXW7, MFF, LATS2, MAPK8, GNA13, TFAP2A, PRKRA, ARHGEF12, SERINC3, STK3, PIK3CB, CASP2, RAPGEF2, WNT5A, RARB, BMP4, BCLAF1, PPID, CTSZ, NCSTN, RIPK2, CYP1B1, NF1, STK4, HMGA2, TGFB2, ECT2, FOSL1, SRPK2, TRPV1, ROBO1, CAMK2D, NCOA1, ARHGEF26, ITGA6, FADD,…
GO:0048608	reproductive structure development	226	3	0.76	355	0.0388	0.1616	1	1	The reproductive developmental process whose specific outcome is the progression of structures that will be used in the process of creating new individuals from one or more parents, from their formation to the mature structures	0.994112	-0.965696	ADAMTS1, AL928654.3, ITGB8, H3F3A, REC8, CYR61, KLHL26, BIRC6, FNDC3A, TAF4, ETNK2, KISS1, NOTCH1, DNAJC19, KITLG, SMAD4, CBL, AKR1C3, PLCD1, GATA2, CTSV, FOXO3, LGR4, STAT5B, VDR, HSF1, PDGFRB, HIF1A, BCL2L1, PSAP, TBX3, BRCA2, MAP2K1, BAK1, TGFBR1, IMMP2L	NRK, KDM5A, TMF1, MSH2, NCOA4, PDGFRA, BASP1, STC2, UBE3A, ARID4B, NKX3-1, EGFR, BPTF, SPP1, ALKBH1, TIPARP, SP3, STK3, CASP2, ASPM, MED1, AXL, RBPJ, GJA1, WNT5A, ZFP36L1, BMP4, FBXW8, SERPINF1, STK4, ING2, PKD2, TGFB2, FOSL1, EGLN1, MGST1, NCOA1, EIF2B2, LEF1, ACVR2A, BIRC2, SRD5A1
GO:0051443	positive regulation of ubiquitin-protein...	94	2	0.31	99	0.03904	0.03904	1	1	Any process that activates, maintains or increases the rate of ubiquitin transferase activity	0.655351	-1.14098	PSMA6, ANAPC7, UBC, ANAPC2, ANAPC11, PSMB10, BMI1, RPS27A, CDK1, PSMA7, GORASP1	PSMD5, ARRDC3, PSMD12, UBE2N, DCUN1D5, PSMA1, ANAPC10, PSMC6, TOPORS, CDC23, PSMA4, FBXW7, DCUN1D4, RAB1A, PSMD14, CDC27, PSMD6, UBE2E1, PSMD7
GO:2000058	regulation of protein ubiquitination inv...	94	2	0.31	100	0.03904	0.03904	1	1	Any process that modulates the frequency, rate or extent of protein ubiquitination involved in ubiquitin-dependent protein catabolic process	0.689421	-0.991682	PSMA6, ANAPC7, UBC, SUFU, ANAPC2, ANAPC11, CCDC22, PSMB10, RPS27A, CDK1, PSMA7	PSMD5, PSMD12, PSMA1, ANAPC10, PSMC6, CDC23, UBE3A, PSMA4, FBXW7, PSMD14, CDC27, PSMD6, UBE2E1, PSMD7
GO:0000478	endonucleolytic cleavage involved in rRN...	12	1	0.04	1118	0.0394	1	1	1	Any endonucleolytic cleavage involved in the conversion of a primary ribosomal RNA (rRNA) transcript into a mature rRNA molecule. Some endonucleolytic cleavages produce the mature end, while others are a step in the process of generating the mature end from the pre-rRNA	0.316584	0.103461	RPSA, RPS21, FCF1, BOP1
GO:0000479	endonucleolytic cleavage of tricistronic...	12	1	0.04	1119	0.0394	1	1	1	Endonucleolytic cleavage of a pre-rRNA molecule originally produced as a tricistronic rRNA transcript that contains the Small SubUnit (SSU) rRNA, the 5.8S rRNA, and the Large SubUnit (LSU) rRNA, in that order, from 5' to 3' along the primary transcript. Primary ribosomal RNA transcripts with three genes, in this order, are produced in the nuclei of many eukaryotic species, including S. cerevisiae	0.316584	0.103461	RPSA, RPS21, FCF1, BOP1
GO:0003171	atrioventricular valve development	12	1	0.04	101	0.0394	0.0394	1	1	The progression of the atrioventricular valve over time, from its formation to the mature structure	0.280882	0.0646574	CYR61, NOTCH1, SMAD4, EFNA1	TGFB2
GO:0008298	intracellular mRNA localization	12	1	0.04	1120	0.0394	1	1	1	Any process in which mRNA is transported to, or maintained in, a specific location within the cell	-0.00945136	-0.26312	MEX3D	EXOSC3, ZFP36L1
GO:0034383	low-density lipoprotein particle clearan...	12	1	0.04	102	0.0394	0.0394	1	1	The process in which a low-density lipoprotein particle is removed from the blood via receptor-mediated endocytosis and its constituent parts degraded	0.298782	0.0769832	CNPY2, LDLR, CSK	HNRNPK
GO:0044030	regulation of DNA methylation	12	1	0.04	1121	0.0394	1	1	1	Any process that modulates the frequency, rate or extent of the covalent transfer of a methyl group to either N-6 of adenine or C-5 or N-4 of cytosine	0.307886	-0.0177673	BRCA1, FAM129B, MPHOSPH8, GSK3B, MBD3, KDM1B	RLF, MBD2, MBD1
GO:0045730	respiratory burst	12	1	0.04	1122	0.0394	1	1	1	A phase of elevated metabolic activity, during which oxygen consumption increases; this leads to the production, by an NADH dependent system, of hydrogen peroxide (H2O2), superoxide anions and hydroxyl radicals	0.33601	0.158692	NOXA1, RPS19, DUSP10
GO:0048710	regulation of astrocyte differentiation	12	1	0.04	103	0.0394	0.0394	1	1	Any process that modulates the frequency, rate or extent of astrocyte differentiation	0.0506484	-0.190946	BIN1, NOTCH1	ID2, NF1, MBD1
GO:0065005	protein-lipid complex assembly	12	1	0.04	1123	0.0394	1	1	1	The aggregation, arrangement and bonding together of proteins and lipids to form a protein-lipid complex	0.195058	-0.023287	BIN1, SOAT1	SNX9, ACSL3
GO:0090153	regulation of sphingolipid biosynthetic ...	12	1	0.04	104	0.0394	0.0394	1	1	Any process that modulates the rate, frequency or extent of sphingolipid biosynthesis. Sphingolipid biosynthesis is the chemical reactions and pathways resulting in the formation of sphingolipids, any of a class of lipids containing the long-chain amine diol sphingosine or a closely related base (a sphingoid)	0.205618	-0.0209673	CYR61, PRKAA1, ORMDL3	SAMD8
GO:0090189	regulation of branching involved in uret...	12	1	0.04	105	0.0394	0.0394	1	1	Any process that modulates the rate, frequency or extent of branching involved in ureteric bud morphogenesis, the process in which the branching structure of the ureteric bud is generated and organized. The ureteric bud is an epithelial tube that grows out from the metanephric duct. The bud elongates and branches to give rise to the ureter and kidney collecting tubules	0.157042	-0.0712873	MAGED1, TGFB1, LGR4	GREM1, BMP4
GO:0090344	negative regulation of cell aging	12	1	0.04	106	0.0394	0.0394	1	1	Any process that decreases the rate, frequency, or extent of cell aging. Cell aging is the progression of the cell from its inception to the end of its lifespan	0.111999	-0.0832537	FOXM1	CDK6
GO:1902742	apoptotic process involved in developmen...	12	1	0.04	1124	0.0394	1	1	1	Any apoptotic process that is involved in anatomical structure development	0.320516	0.0892278	CYR61, NOTCH1, SCRIB, VDR, BAK1	TGFB2, LEF1
GO:1905038	regulation of membrane lipid metabolic p...	12	1	0.04	107	0.0394	0.0394	1	1		0.205618	-0.0209673	CYR61, PRKAA1, ORMDL3	SAMD8
GO:2000303	regulation of ceramide biosynthetic proc...	12	1	0.04	108	0.0394	0.0394	1	1	Any process that modulates the frequency, rate or extent of a ceramide biosynthetic process	0.205618	-0.0209673	CYR61, PRKAA1, ORMDL3	SAMD8
GO:0061458	reproductive system development	229	3	0.77	361	0.04011	0.16503	1	1	The progression of the reproductive system over time from its formation to the mature structure. The reproductive system consists of the organs that function in reproduction	0.994112	-0.965696	ADAMTS1, AL928654.3, ITGB8, H3F3A, REC8, CYR61, KLHL26, BIRC6, FNDC3A, TAF4, ETNK2, KISS1, NOTCH1, DNAJC19, KITLG, SMAD4, CBL, AKR1C3, PLCD1, GATA2, CTSV, FOXO3, LGR4, STAT5B, VDR, HSF1, PDGFRB, HIF1A, BCL2L1, PSAP, TBX3, BRCA2, MAP2K1, BAK1, TGFBR1, IMMP2L	NRK, KDM5A, TMF1, MSH2, NCOA4, PDGFRA, BASP1, STC2, UBE3A, ARID4B, NKX3-1, EGFR, BPTF, SPP1, ALKBH1, TIPARP, SP3, STK3, CASP2, ASPM, MED1, AXL, RBPJ, GJA1, WNT5A, ZFP36L1, BMP4, FBXW8, SERPINF1, PLEKHA5, STK4, ING2, PKD2, TGFB2, FOSL1, EGLN1, MGST1, NCOA1, EIF2B2, LEF1, ACVR2A, BIRC2, SRD5A1
GO:1903320	regulation of protein modification by sm...	229	3	0.77	109	0.04011	0.04011	1	1	Any process that modulates the frequency, rate or extent of protein modification by small protein conjugation or removal	0.856131	-1.16715	PSMA6, SKP2, CDK9, ANAPC7, UBC, PRKCE, HMG20A, SUFU, BRCA1, EGR1, UBXN2A, NDFIP2, UFL1, TSPO, ANAPC2, SPHK1, ANAPC11, XIAP, ISG15, CCDC22, PSMB10, BMI1, RPS27A, TOLLIP, NDFIP1, CDK1, TICAM1, RASSF5, HSPA5, PSMA7, GORASP1, TGFBR1	PSMD5, ARRDC3, PSMD12, HSP90AA1, UBE2N, DCUN1D5, PSMA1, ANAPC10, PSMC6, TOPORS, CDC23, UBE3A, PSMA4, DNAJA1, FBXW7, GLMN, DCUN1D4, ATG5, RNF20, RAB1A, DERL1, FKBP1A, PSMD14, TRIP12, CDC27, PSMD6, UBE2E1, TNFAIP3, UBR5, RIPK2, PSMD7, PTTG1IP, TRIM21, BIRC2, GNL3L, FYN
GO:0051726	regulation of cell cycle	776	6	2.59	606	0.04043	0.35012	1	1	Any process that modulates the rate or extent of progression through the cell cycle	1.02819	-1.47259	PSMA6, SKP2, PKN2, SKIL, KIF14, CCNK, LIN9, TMEM8B, PNPT1, PIDD1, CDK9, CDK19, ANAPC7, UBC, BIRC6, LAMTOR4, BIN1, RPA3, PRKCE, DCLRE1B, BRCA1, CCNE2, PPP1R1C, MADD, PTPN3, HMGN5, BABAM1, FIGNL1, ENTR1, ANAPC2, ZNF703, DAPK3, MDM4, SCRIB, MECP2, CDK20, CDK8, GEN1, DNA2, PRKAA1, SPHK1, FOXM1, ANAPC11, MUC1, CDK5R1, GIGYF2, ATAD5, LIN54, RASSF1, TFAP4, GDPD5, TOP2A, RBL1, FBXO31, FLCN, TGFB1, PSMB10…	ITGB1, CETN2, PSMD5, MTBP, RNASEH2B, PSMD12, CCNG1, SIN3A, BUB1, PRKACB, INTS7, PCNA, SYF2, E2F5, NUSAP1, CSNK2A2, DYNC1LI1, PSMA1, ANAPC10, ZNF655, DDIAS, MSH2, UBA3, NPM1, TOPBP1, PSMC6, RAB11A, PRNP, CHMP2B, CDC23, TRIM36, PSMA4, MNAT1, CALM2, PRKAB2, SDCBP, ABRAXAS1, GTF2H1, SPIN2B, PLRG1, NKX3-1, CCNH, PSMG2, MAP3K20, FBXW7, EGFR, DLGAP5, TTK, LATS2, PHIP, MDM1, DYNLT3, SENP6, HECW2, USP47, …
GO:0000209	protein polyubiquitination	230	3	0.77	110	0.04055	0.04055	1	1	Addition of multiple ubiquitin groups to a protein, forming a ubiquitin chain	0.905984	-1.16378	UNKL, PSMA6, SKP2, RNF6, ANAPC7, UBC, BRCA1, RNF166, RC3H2, ANAPC2, CBL, TRIM5, FBXL19, ANAPC11, LNPEP, XIAP, FBXO31, PSMB10, UBR2, DTX3L, RPS27A, AMFR, BFAR, TMEM129, PSMA7, TRIM69, ZNRF1, RNF114, UBE2J2, TRIM32	PSMD5, UBE2D3, PSMD12, UBE2N, RFFL, PSMA1, ANAPC10, NPEPPS, SMURF2, PSMC6, TOPORS, CDC23, TRIM36, UBE3A, PSMA4, CBFB, UBE2A, FBXW7, KLHL20, UBE2Q2, ANAPC13, FBXL5, RNF20, HACE1, ARIH1, HERC6, RNF14, DTL, PSMD14, UBE2E2, TRIP12, CDC27, C18orf25, PSMD6, UBE2E1, RBBP6, TNFAIP3, FBXW8, UBR5, HLTF, PSMD7, UBE2E3, TRIM21, BIRC2, RNF19A, WSB1, NEDD4, ERCC8
GO:0010831	positive regulation of myotube different...	13	1	0.04	1125	0.04262	1	1	1	Any process that increases the frequency, rate or extent of myotube differentiation. Myotube differentiation is the process in which a relatively unspecialized cell acquires specialized features of a myotube cell. Myotubes are multinucleated cells that are formed when proliferating myoblasts exit the cell cycle, differentiate and fuse	0.229371	0.0289827	THRA, FAM129B
GO:0033145	positive regulation of intracellular ste...	13	1	0.04	111	0.04262	0.04262	1	1	Any process that activates or increases the frequency, rate or extent of the activity of any intracellular steroid hormone receptor signaling pathway	0.237512	-0.149108	SKP2, KMT2D	DDX5, DDX17, MED1
GO:0048741	skeletal muscle fiber development	13	1	0.04	1126	0.04262	1	1	1	The process whose specific outcome is the progression of the skeletal muscle fiber over time, from its formation to the mature structure. Muscle fibers are formed by the maturation of myotubes. They can be classed as slow, intermediate/fast or fast	0.217097	-0.0559371	FAM129B, DNER, WNT10B	MYORG
GO:0061213	positive regulation of mesonephros devel...	13	1	0.04	112	0.04262	0.04262	1	1	Any process that increases the rate, frequency or extent of mesonephros development. Mesonephros development is the process whose specific outcome is the progression of the mesonephros over time, from its formation to the mature structure. The mesonephros is an organ that filters the blood and excretes the end products of body metabolism in the form of urine	0.158624	-0.195002	MAGED1, TGFB1, LGR4	BASP1, GREM1
GO:0010942	positive regulation of cell death	403	4	1.35	113	0.04361	0.04361	1	1	Any process that increases the rate or frequency of cell death. Cell death is the specific activation or halting of processes within a cell so that its vital functions markedly cease, rather than simply deteriorating gradually over time, which culminates in cell death	0.834037	-1.26905	SKIL, PIDD1, TIAM1, CDK19, UBC, PREX1, CYR61, BIN1, TRIO, RASSF2, IFI27, PPM1F, OSGIN1, AKAP13, VAV2, DDX20, NOTCH1, TSPO, DAPK3, SCRIB, MAGED1, HTT, AKR1C3, CDK5R1, PAK2, NLRP3, TFAP4, TOP2A, FLCN, GSK3B, PTPA, TGFB1, MAPT, FOXO3, PPP3R1, CHEK2, ING4, RPS27A, TRADD, FNIP1, CAPN10, UTP11, IFIT2, VDR, HMGCR, HSF1, PDGFRB, ITM2C, TIMP3, ATF3, BCL2L1, RBM5, CYLD, APBB1, ARHGEF4, ARHGEF19, HYAL2, MAP…	ITGB1, TIAM2, WDR35, CREB1, ITGB3BP, MAP2K4, YWHAZ, BNIP3L, DNM1L, LYN, EEF1E1, TRIM13, NCK1, PRNP, YWHAH, ARL6IP5, NKX3-1, MAP3K20, SOS2, DNAJA1, ING3, FBXW7, MFF, LATS2, MAPK8, GNA13, TFAP2A, PRKRA, ARHGEF12, SERINC3, STK3, PIK3CB, CASP2, RAPGEF2, WNT5A, RARB, BMP4, BCLAF1, PPID, CTSZ, NCSTN, RIPK2, CYP1B1, NF1, STK4, HMGA2, TGFB2, ECT2, FOSL1, SRPK2, TRPV1, ROBO1, CAMK2D, NCOA1, ARHGEF26, ITGA…
GO:0043410	positive regulation of MAPK cascade	238	3	0.8	114	0.04416	0.04416	1	1	Any process that activates or increases the frequency, rate or extent of signal transduction mediated by the MAPK cascade	0.87319	-1.14219	CARD9, FGFR3, FZD8, TIAM1, UBC, ADAM9, RASSF2, PRKCE, PDE8A, MADD, AKAP13, KISS1, KITLG, TRIM5, KRAS, IKBKG, MAGED1, TAB3, PRKAA1, SEMA7A, MAP2K3, S1PR2, C5AR1, CDH2, CSPG4, TGFB1, RAPGEF1, CRKL, HRAS, EFNA1, RPS27A, CDK1, HMGCR, IRAK2, PDGFRB, NENF, PSAP, MAP3K15, ERP29, MAP2K1, DBNL, JUN, PTPN1, C1QTNF2, TGFBR1, CSK	DVL3, PDGFD, NRK, PDCD10, MAP2K4, EIF2AK2, UBE2N, PDGFRA, TAB2, ARL6IP5, SDCBP, DNAJC27, MAP3K20, FBXW7, EGFR, RAP1B, IQGAP3, LAMTOR3, MAP3K21, IQGAP1, STK3, PIK3CB, RAPGEF2, HACD3, SHC1, C5, TAOK3, RYK, SPRY2, IL1B, ERN1, NPTN, WNT5A, BMP4, RIPK2, SPAG9, TGFB2, ERCC6, MAP3K7
GO:0010468	regulation of gene expression	2728	14	9.12	659	0.04418	0.41141	1	1	Any process that modulates the frequency, rate or extent of gene expression. Gene expression is the process in which a gene's coding sequence is converted into a mature gene product or products (proteins or RNA). This includes the production of an RNA transcript as well as any processing to produce a mature RNA product or an mRNA (for protein-coding genes) and the translation of that mRNA into pr…	1.27121	-1.89945	LRP8, AL928654.3, KLF6, ITGB8, ZNF554, PSMA6, KAT6A, FOSL2, KLF12, EGLN2, PKN2, NUFIP1, EXOSC6, SKIL, HES4, ZNF326, RNF6, CNPY2, ATAD2B, ZNF623, GTF2A1, MEX3D, CCNK, ZBTB8A, ZBTB3, SP4, H3F3A, HOXC13, NPAT, KLF16, GTF2H3, ZNF770, TOB2, C1D, FZD8, CDYL, SOD2, HES6, PNPT1, ARHGAP35, PIDD1, MAK, POFUT1, RXRB, CDK9, ZNF197, RPSA, HIST1H2AG, TSNAX, ZNF160, ZBTB18, TAF3, UBC, ZNF599, BAHD1, TAF9B, MC1R…	ZNF83, ZFP69B, ZNF749, FAM220A, ZNF711, ZNF17, ZNF138, PSMD5, ZNF605, ZNF441, ZNF675, ZNF181, HAT1, ZNF480, UBE2D3, THRB, TERF2IP, DVL3, RPL39, RNASEH2B, GSPT1, ZNF75A, SUPT3H, EPC1, RBM39, SLTM, NOV, RNF2, UCHL5, NFE2L2, HIGD1A, EIF3E, TNPO1, PSMD12, MED21, TENT2, PDCD10, WDR35, ZKSCAN8, YEATS4, MIER3, PAIP1, ZNF625, RBM17, CREB1, TAF5, PIK3R1, RHOQ, PHF10, MTERF2, DMTF1, DYRK1A, SIN3A, DIS3, ZN…
GO:0016071	mRNA metabolic process	596	5	1.99	1127	0.04548	1	1	1	The chemical reactions and pathways involving mRNA, messenger RNA, which is responsible for carrying the coded genetic 'message', transcribed from DNA, to sites of protein assembly at the ribosomes	0.953939	-1.44764	EXOSC6, ZNF326, POLR3K, TRUB1, GTF2H3, CDC40, PPP4R2, PNPT1, CDK9, RPSA, RPL31, PRPF38B, TNRC6B, RPS10, WDR33, CCAR1, RPS21, RPS19, DDX20, RNPC3, SUPT6H, EDC3, ZHX2, RPL10, UBL5, DDX6, SUGP2, RPL41, RPS8, RPS29, ARL6IP4, C5AR1, RPS12, AQR, SNRPB2, LSM5, SREK1IP1, RPL21, PTBP1, RPL35A, SNRPB, THRAP3, RPL37A, HNRNPA1L2, RNH1, CMTR1, RPLP2, DHX8, SREBF1, CACTIN, TSEN54, RPS27A, GEMIN8, RPL34, RPS23,…	SLU7, CMTR2, RPL39, MTREX, GSPT1, RBM39, SLTM, BCAS2, RBMXL1, EIF3E, DHX15, TENT2, PAIP1, RBM17, DYRK1A, DIS3, RBM7, ZBTB1, GSPT2, RPL15, SYF2, PTBP3, TSEN15, MBNL1, PAPOLA, DHX40, GTF2F2, PPWD1, STRAP, RBM25, UPF2, PPIL3, RAVER2, MNAT1, DHX32, GTF2H1, PLRG1, CCNH, RSRC1, TTC37, PCF11, LSM1, HNRNPR, EXOSC3, DDX5, HIPK3, RPL36A, RNF20, ZMAT2, SRPK1, CWC22, ZCCHC8, PPP2R2A, ZC3HAV1, LGALS3, SSB, EI…
GO:0006978	DNA damage response, signal transduction...	14	1	0.05	115	0.04582	0.04582	1	1	A cascade of processes induced by the cell cycle regulator phosphoprotein p53, or an equivalent protein, resulting in the induction of the transcription of p21 (also known as WAF1, CIP1 and SDI1) or any equivalent protein, in response to the detection of DNA damage	0.434632	0.154278	BRCA1, FOXM1, MUC1, TFAP4, CHEK2, ING4, BRCA2
GO:0014904	myotube cell development	14	1	0.05	1128	0.04582	1	1	1	The process aimed at the progression of a myotube cell over time, from initial commitment of the cell to a specific fate, to the fully functional differentiated cell. Myotubes are multinucleated cells that are formed when proliferating myoblasts exit the cell cycle, differentiate and fuse	0.217097	-0.114201	FAM129B, DNER, WNT10B	MYORG
GO:0033688	regulation of osteoblast proliferation	14	1	0.05	116	0.04582	0.04582	1	1	Any process that modulates the frequency, rate or extent of osteoblast proliferation	0.273095	-0.271444	CYR61, PLXNB1	HPSE, EIF2AK2, GREM1, NPR3
GO:0060343	trabecula formation	14	1	0.05	117	0.04582	0.04582	1	1	The process of creating a trabecula in an organ. A trabecula is a small, often microscopic, tissue element in the form of a small beam, strut or rod, which generally has a mechanical function. Trabecula are usually but not necessarily, composed of dense collagenous tissue	0.279462	-0.168301	ADAMTS1, WNT10B	GREM1, FKBP1A, EGLN1
GO:0061157	mRNA destabilization	14	1	0.05	118	0.04582	0.04582	1	1	Any process that decreases the stability of an mRNA molecule, making it more vulnerable to degradative processes. Messenger RNA is the intermediate molecule between DNA and protein. It includes UTR and coding sequences. It does not contain introns	0.18318	-0.288246	MEX3D, GIGYF2	HNRNPR, RC3H1, PUM1, ZFP36L1, HNRNPD
GO:0061217	regulation of mesonephros development	14	1	0.05	119	0.04582	0.04582	1	1	Any process that modulates the rate, frequency or extent of mesonephros development. Mesonephros development is the process whose specific outcome is the progression of the mesonephros over time, from its formation to the mature structure. The mesonephros is an endocrine and metabolic organ that filters the blood and excretes the end products of body metabolism in the form of urine	0.158624	-0.280576	MAGED1, TGFB1, LGR4	BASP1, GREM1, BMP4
GO:0071428	rRNA-containing ribonucleoprotein comple...	14	1	0.05	1129	0.04582	1	1	1	The directed movement of a ribonucleoprotein complex that contains ribosomal RNA from the nucleus to the cytoplasm	0.255439	-0.215797	RPSA, ZNF593	SDAD1, NUP88, ABCE1, LTV1
GO:0060255	regulation of macromolecule metabolic pr...	3576	17	11.95	1001	0.04603	0.91847	1	1	Any process that modulates the frequency, rate or extent of the chemical reactions and pathways involving macromolecules, any molecule of high relative molecular mass, the structure of which essentially comprises the multiple repetition of units derived, actually or conceptually, from molecules of low relative molecular mass	1.29736	-1.99466	LRP8, AL928654.3, KLF6, ITGB8, CARD9, ZNF554, PSMA6, KAT6A, FGFR3, SKP2, FOSL2, KLF12, EGLN2, PKN2, NUFIP1, EXOSC6, SKIL, HES4, ZNF326, RNF6, CNPY2, ATAD2B, ZNF623, GTF2A1, KIF14, SOCS7, MEX3D, CCNK, EEF2K, ZBTB8A, ZBTB3, SP4, H3F3A, PPP1R3D, SH3RF1, HOXC13, NPAT, KLF16, GTF2H3, ZNF770, TOB2, C1D, PPP4R2, FZD8, PRKAR2B, CDYL, SOD2, HES6, PNPT1, ARHGAP35, PIDD1, MAK, PBLD, POFUT1, RXRB, CDK9, ZNF1…	POT1, ITGB1, ZNF83, ZFP69B, ZNF749, FAM220A, ZNF711, ZNF17, ZNF138, PSMD5, ZNF605, ZNF441, ZNF675, ZNF181, HAT1, ZNF480, UBE2D3, ARRDC3, THRB, TERF2IP, DVL3, RPL39, RNASEH2B, GSPT1, ZNF75A, SUPT3H, EPC1, PDGFD, RBM39, SLTM, NOV, RNF2, UCHL5, NFE2L2, HIGD1A, EIF3E, NRK, TNPO1, PSMD12, USP25, MED21, TENT2, PDCD10, CCNG1, WDR35, ZKSCAN8, YEATS4, MIER3, PAIP1, GDF11, ZNF625, RBM17, CREB1, TAF5, PIK3R…
GO:0042770	signal transduction in response to DNA d...	103	2	0.34	120	0.04606	0.04606	1	1	A cascade of processes induced by the detection of DNA damage within a cell	0.639796	-0.785163	PIDD1, UBC, BRCA1, MDM4, FOXM1, MUC1, TFAP4, RBL2, FOXO3, CHEK2, ING4, RPS27A, CDK1, BRCA2, TNKS1BP1	DYRK1A, PCNA, EEF1E1, NPM1, DDX5, CASP2, CNOT2, TRIAP1, CEP63, CNOT1, PTTG1IP, CNOT8, CNOT10
GO:0006935	chemotaxis	243	3	0.81	121	0.04649	0.04649	1	1	The directed movement of a motile cell or organism, or the directed growth of a cell guided by a specific chemical concentration gradient. Movement may be towards a higher concentration (positive chemotaxis) or towards a lower concentration (negative chemotaxis)	0.782885	-1.08753	PSPN, ARHGAP35, TIAM1, PREX1, CYR61, PPM1F, NRAS, RPS19, LAMA2, NOTCH1, SEMA6C, SMAD4, SCRIB, KRAS, FAM129B, CDK5R1, NEO1, C5AR1, GAB2, TGFB1, B4GAT1, HRAS, NBL1, RALBP1, CELSR3, PTPRJ, HRH1, EZR, PDGFRB, TRPM2, ETV4, MAP2K1	PDGFD, NOV, CREB1, PIK3R1, USP14, LYN, ENAH, PDGFRA, SBDS, OPHN1, AC068234.1, AGTR1, ISL1, ALKBH1, HOXB9, LGALS3, ADAM10, GREM1, PIK3CB, MATN2, SHC1, C5, RYK, MET, RPS6KA5, VEGFC, IL1B, ENPP2, WNT5A, BMP4, CMTM6, LTB4R2, NTN4, TGFB2, PLP2, SEMA3C, FOSL1, CHN1, ROBO1, ELMO2, LEF1, MYH10, FYN
GO:0042330	taxis	244	3	0.82	122	0.04697	0.04697	1	1	The directed movement of a motile cell or organism in response to an external stimulus	0.782885	-1.08753	PSPN, ARHGAP35, TIAM1, PREX1, CYR61, PPM1F, NRAS, RPS19, LAMA2, NOTCH1, SEMA6C, SMAD4, SCRIB, KRAS, FAM129B, CDK5R1, NEO1, C5AR1, GAB2, TGFB1, B4GAT1, HRAS, NBL1, RALBP1, CELSR3, PTPRJ, HRH1, EZR, PDGFRB, TRPM2, ETV4, MAP2K1	PDGFD, NOV, CREB1, PIK3R1, USP14, LYN, ENAH, PDGFRA, SBDS, OPHN1, AC068234.1, AGTR1, ISL1, ALKBH1, HOXB9, LGALS3, ADAM10, GREM1, PIK3CB, MATN2, SHC1, C5, RYK, MET, RPS6KA5, ID2, VEGFC, IL1B, ENPP2, WNT5A, BMP4, CMTM6, LTB4R2, NTN4, TGFB2, PLP2, SEMA3C, FOSL1, CHN1, ROBO1, ELMO2, LEF1, MYH10, FYN
GO:0019725	cellular homeostasis	415	4	1.39	123	0.04772	0.04772	1	1	Any process involved in the maintenance of an internal steady state at the level of the cell	1.27871	-1.3903	SLC4A7, TMX1, EGLN2, NHLRC2, TIAM1, UBC, SLC9B1, SLC12A2, PRKCE, TXNDC15, AP3D1, FLVCR1, SELENOK, KISS1, MYO5A, SLC26A11, TXNDC16, RAB11FIP5, SMAD4, HTT, DNA2, SLC46A1, JSRP1, P4HB, GATA2, C5AR1, GPR4, TGFB1, CCDC22, SLC9A5, SLC9A8, FOXO3, GPR17, BDKRB1, SLC4A11, NDFIP1, GSTO1, RTEL1, VDR, HMGCR, C2CD2L, ORMDL3, HIF1A, CKB, TRPM2, TWNK, ATP2A1, TMEM165, GCLM, BAK1, NMB, SPPL3, TRIM32, PTPRN2, CLN6	ATP2C1, PPT1, SLC30A4, XPR1, NFE2L2, WDR35, SLC9A6, PIK3R1, SIN3A, PCNA, LYN, TXNL1, SLC39A6, ERO1A, KRIT1, IREB2, MICU2, PDGFRA, PRNP, CHMP2B, STC2, CALM2, SLC39A8, TPT1, AGTR1, RAB39A, SLC35G1, ATG5, GNA13, OXTR, SLC11A2, LAMP2, ATP2B1, F2RL2, ATP2B4, FKBP1A, ATP6V1D, PIK3CB, GTF2I, TMX3, ATP6V0E1, ERN1, NPTN, GJA1, PDK3, TXNDC9, SLC24A5, DNAJC10, PDIA6, SERPINF1, TXNDC12, RAB7A, UBASH3B, PKD2,…
GO:0055114	oxidation-reduction process	606	5	2.03	498	0.0483	0.25844	1	1	A metabolic process that results in the removal or addition of one or more electrons to or from a substance, with or without the concomitant removal or addition of a proton or protons	1.1227	-1.14794	TMX1, ACAD11, EGLN2, PPP1R3D, D2HGDH, SOD2, PNPT1, NDUFA11, UQCRHL, MTHFR, UBC, LOX, DEGS1, OSGIN1, NDUFA2, TET2, CYB561D1, PYGB, NDUFB2, PFKFB4, CYB5B, MECP2, PRKAA1, AKR1C3, PECR, STK40, ASPHD1, ALKBH7, HSD17B1, NUDT19, NDUFA9, P4HB, IMPDH1, GSK3B, UQCRQ, HIGD2A, ACAD8, NDUFB6, LBR, SLC25A10, DHRS13, SCCPDH, DOHH, COX10, MTHFD2, GFOD1, ALDH4A1, ABCD1, STBD1, RPS27A, H6PD, CDK1, RDH5, ALDH3A2, C…	UGP2, HIGD1A, ABCC4, GPD2, UQCRB, NBPF9, KDM5A, TXNL1, FASTKD3, SQLE, ERO1A, ALKBH8, ABCD3, NDUFS1, OXR1, CALM2, AP003108.2, ALDH5A1, JMJD1C, CYP20A1, ACADSB, ACADM, DUS4L, SCP2, PLOD2, IDH3A, HSD17B11, KDM5D, ALDH9A1, PMPCB, ALKBH1, NDUFA12, KDM3A, MICAL2, RRM2B, NBPF20, GDI2, ADIPOR1, GFPT1, PPP1R3E, NNT, GYG1, TMX3, ME2, CRYZL1, RDH11, PEX2, ASPH, ENOX2, PDHB, ETFDH, NOA1, MTO1, SLC25A13, AUH,…
GO:0009200	deoxyribonucleoside triphosphate metabol...	15	1	0.05	1130	0.04901	1	1	1	The chemical reactions and pathways involving a deoxyribonucleoside triphosphate, a compound consisting of a nucleobase linked to a deoxyribose sugar esterified with triphosphate on the sugar	0.142669	-0.29117	DCTPP1, SAMHD1	RRM2B, TBPL1, AK9, TYMS
GO:0009219	pyrimidine deoxyribonucleotide metabolic...	15	1	0.05	1131	0.04901	1	1	1	The chemical reactions and pathways involving a pyrimidine deoxynucleotide, a compound consisting of nucleoside (a pyrimidine base linked to a deoxyribose sugar) esterified with a phosphate group at either the 3' or 5'-hydroxyl group of the sugar	0.249581	-0.21945	DCTPP1, NTHL1	UNG, TBPL1, MBD4, OGG1, TYMS
GO:0034381	plasma lipoprotein particle clearance	15	1	0.05	124	0.04901	0.04901	1	1	The process in which a lipoprotein particle is removed from the blood via receptor-mediated endocytosis and its constituent parts degraded	0.303105	-0.0880632	CNPY2, LDLR, CSK	VLDLR, HNRNPK
GO:0042772	DNA damage response, signal transduction...	15	1	0.05	125	0.04901	0.04901	1	1	A cascade of processes initiated in response to the detection of DNA damage, and resulting in the induction of transcription	0.453999	0.121742	BRCA1, FOXM1, MUC1, TFAP4, CHEK2, ING4, BRCA2
GO:0050779	RNA destabilization	15	1	0.05	126	0.04901	0.04901	1	1	Any process that decreases the stability of an RNA molecule, making it more vulnerable to degradative processes	0.23303	-0.306	MEX3D, GIGYF2	HNRNPR, RC3H1, PUM1, ZFP36L1, HNRNPD

## Sheet: top 80 upreg
GO id	Term	Genes in genome (background)	Genes in top-80 upreg	Expected genes in top-80 upreg	Rank in P.Fisher.elim	P.Fisher	P.Fisher.elim	FDR.Fisher	FDR.Fisher.elim	Description	Avg.LogFC for top-10 upreg	Avg.LogFC for top-10 downreg	Upreg genes (LogFC > 0.4)	Downreg genes (LogFC < -0.4)
GO:0006614	SRP-dependent cotranslational protein ta...	93	6	0.63	1	3.7e-05	3.7e-05	0.10125	0.225	The targeting of proteins to a membrane that occurs during translation and is dependent upon two key components, the signal-recognition particle (SRP) and the SRP receptor. SRP is a cytosolic particle that transiently binds to the endoplasmic reticulum (ER) signal sequence in a nascent protein, to the large ribosomal unit, and to the SRP receptor in the ER membrane	0.666801	-0.856893	RPSA, RPL31, RPS10, RPS21, RPS19, RPL10, RPL41, RPS8, RPS29, RPS12, RPL21, RPL35A, RPL37A, RPLP2, RPS27A, RPL34, RPS23, RPS28	SRP19, RPL39, RPL15, RPL36A, SRP72, SRP54, SRP14, RPL17-C18orf32, SRP9, RPL9, RPL17
GO:0000461	endonucleolytic cleavage to generate mat...	2	2	0.01	2	4.5e-05	4.5e-05	0.10125	0.225	Endonucleolytic cleavage at the 3'-end of the SSU-rRNA from an originally tricistronic rRNA transcript that contained the Small Subunit (SSU) rRNA, the 5.8S rRNA, and the Large Subunit (LSU) rRNA in that order from 5' to 3' along the primary transcript, to produce the mature end of the SSU-rRNA	0.779798	0.779798	RPSA, RPS21
GO:0006613	cotranslational protein targeting to mem...	98	6	0.67	1623	5e-05	1	0.10125	1	The targeting of proteins to a membrane that occurs during translation. The transport of most secretory proteins, particularly those with more than 100 amino acids, into the endoplasmic reticulum lumen occurs in this manner, as does the import of some proteins into mitochondria	0.666801	-0.856893	RPSA, RPL31, RPS10, RPS21, RPS19, RPL10, RPL41, RPS8, RPS29, RPS12, RPL21, RPL35A, RPL37A, RPLP2, RPS27A, RPL34, RPS23, RPS28	SRP19, RPL39, RPL15, RPL36A, SRP72, SRP54, SRP14, RPL17-C18orf32, SRP9, RPL9, RPL17, TRAM1, SSR1
GO:0042274	ribosomal small subunit biogenesis	60	5	0.41	533	5e-05	0.22582	0.10125	1	A cellular process that results in the biosynthesis of constituent macromolecules, assembly, and arrangement of constituent parts of a small ribosomal subunit; includes transport to the sites of protein synthesis	0.57524	-0.68158	RPSA, RPS10, RPS21, RPS19, RPS8, FCF1, UTP11, RPS27L, RPS28	MPHOSPH10, UTP3, HEATR1, MRPS9, UTP4, NOL11, LTV1, DCAF13
GO:0000462	maturation of SSU-rRNA from tricistronic...	32	4	0.22	25	6e-05	0.0107	0.10125	1	Any process involved in the maturation of a precursor Small SubUnit (SSU) ribosomal RNA (rRNA) molecule into a mature SSU-rRNA molecule from the pre-rRNA molecule originally produced as a tricistronic rRNA transcript that contains the Small Subunit (SSU) rRNA, 5.8S rRNA, and the Large Subunit (LSU) in that order from 5' to 3' along the primary transcript	0.503622	-0.488896	RPSA, RPS21, RPS19, RPS8, FCF1	UTP3, HEATR1, MRPS9, DCAF13
GO:0045047	protein targeting to ER	102	6	0.69	1624	6.2e-05	1	0.10125	1	The process of directing proteins towards the endoplasmic reticulum (ER) using signals contained within the protein. One common mechanism uses a 16- to 30-residue signal sequence, typically located at the N-terminus of the protein and containing positively charged amino acids followed by a continuous stretch of hydrophobic residues, which directs the ribosome to the ER membrane and initiates tran…	0.666801	-0.85819	RPSA, RPL31, RPS10, RPS21, RPS19, RPL10, RPL41, RPS8, RPS29, RPS12, RPL21, RPL35A, RPL37A, RPLP2, RPS27A, RPL34, RPS23, PMM1, RPS28	SRP19, RPL39, RPL15, RPL36A, SRP72, SRP54, SRP14, SPCS2, RPL17-C18orf32, SRP9, RPL9, RPL17
GO:0072599	establishment of protein localization to...	105	6	0.71	1625	7.3e-05	1	0.10125	1	The directed movement of a protein to a specific location in the endoplasmic reticulum	0.666801	-0.868825	RPSA, RPL31, RPS10, RPS21, RPS19, RPL10, RPL41, RPS8, RPS29, RPS12, RPL21, RPL35A, RPL37A, RPLP2, RPS27A, RPL34, RPS23, PMM1, RAB3GAP1, RPS28	SRP19, RPL39, RPL15, RPL36A, SRP72, RAB10, SRP54, SRP14, SPCS2, RPL17-C18orf32, SRP9, RPL9, RPL17
GO:0000028	ribosomal small subunit assembly	13	3	0.09	3	8.1e-05	8.1e-05	0.10125	0.27	The aggregation, arrangement and bonding together of constituent RNAs and proteins to form the small ribosomal subunit	0.390674	0.0911732	RPSA, RPS10, RPS19, RPS27L, RPS28
GO:0000184	nuclear-transcribed mRNA catabolic proce...	119	6	0.81	4	0.00015	0.00015	0.15	0.36	The nonsense-mediated decay pathway for nuclear-transcribed mRNAs degrades mRNAs in which an amino-acid codon has changed to a nonsense codon; this prevents the translation of such mRNAs into truncated, and potentially harmful, proteins	0.666801	-1.00025	RPSA, RPL31, RPS10, RPS21, RPS19, RPL10, RPL41, RPS8, RPS29, RPS12, RPL21, RPL35A, RPL37A, RPLP2, RPS27A, RPL34, RPS23, RPS28	RPL39, GSPT1, EIF3E, GSPT2, RPL15, UPF2, RPL36A, PPP2R2A, PNRC2, RPL17-C18orf32, RPL9, RPL17, PABPC1, SMG8
GO:0070972	protein localization to endoplasmic reti...	121	6	0.82	1626	0.00016	1	0.15	1	A process in which a protein is transported to, or maintained in, a location within the endoplasmic reticulum	0.666801	-0.966198	RPSA, RPL31, RPS10, RPS21, RPS19, RPL10, RPL41, RPS8, RPS29, RPS12, RPL21, RPL35A, RPL37A, RPLP2, RPS27A, RPL34, RPS23, PMM1, UBAC2, HSPA5, KDELR2, RAB3GAP1, RPS28	SRP19, RPL39, RPL15, KDELR3, RTN4, VAPA, RPL36A, SRP72, RAB10, SRP54, SRP14, SPCS2, RPL17-C18orf32, SRP9, RPL9, RPL17
GO:0019080	viral gene expression	175	7	1.19	172	0.00017	0.06659	0.15	1	A process by which a viral gene is converted into a mature gene product or products (proteins or RNA). This includes viral transcription, processing to produce a mature RNA product, and viral translation	0.698558	-1.03228	CDK9, RPSA, RPL31, RPS10, RPS21, RPS19, RPL10, RPL41, RPS8, RPS29, TFAP4, RPS12, RPL21, PTBP1, RPL35A, RPL37A, RPLP2, RPS27A, RPL34, RPS23, CTDP1, POM121C, TARBP2, NELFB, RAE1, JUN, EIF2AK4, TRIM32, RPS28	RPL39, MON1B, RPL15, GTF2B, NUPL2, TRIM13, NUP35, NUP54, GTF2F2, NUP37, NUP205, RPL36A, NUP88, ZNF639, SSB, RPL17-C18orf32, RPL9, RPL17, CCNT1, POLR2A, HMGA2, NUP43, SP1, TRIM21, LEF1, CHD1
GO:0006413	translational initiation	177	7	1.2	5	0.00018	0.00018	0.15	0.36	The process preceding formation of the peptide bond between the first two amino acids of a protein. This includes the formation of a complex of the ribosome, mRNA, and an initiation complex that contains the first aminoacyl-tRNA	0.686162	-1.17049	RPSA, RPL31, EIF2B1, RPS10, RPS21, RPS19, RPL10, RPL41, RPS8, RPS29, RPS12, DNAJC3, RPL21, PTBP1, RPL35A, RPL37A, RPLP2, RPS27A, EIF1AX, RPL34, RPS23, EIF2AK4, RPS28	EIF3M, RPL39, EIF3E, PAIP1, RPL15, EIF2AK2, PPP1R15B, EIF2A, NPM1, NCK1, EIF1B, EIF3J, EIF3H, MTIF3, RPL36A, ALKBH1, YAE1D1, SSB, EIF4B, FMR1, EIF4E, RPS6KB1, ABCE1, C8orf88, GLE1, RPL17-C18orf32, RPL9, MTFMT, EIF5, RPL17, EIF4A2, EIF4H, DHX29, PABPC1, EIF5B, PAIP2, EIF2B2
GO:0030490	maturation of SSU-rRNA	46	4	0.31	73	0.00025	0.02571	0.192308	1	Any process involved in the maturation of a precursor Small SubUnit (SSU) ribosomal RNA (rRNA) molecule into a mature SSU-rRNA molecule	0.519776	-0.650387	RPSA, RPS21, RPS19, RPS8, FCF1, RPS28	MPHOSPH10, UTP3, HEATR1, MRPS9, UTP4, NOL11, DCAF13
GO:0044033	multi-organism metabolic process	193	7	1.31	407	0.00031	0.16628	0.221429	1	A metabolic process - chemical reactions and pathways, including anabolism and catabolism, by which living organisms transform chemical substances - which involves more than one organism	0.698558	-1.07424	CDK9, RPSA, RPL31, RPS10, RPS21, RPS19, RPL10, RPL41, RPS8, RPS29, MAP2K3, TFAP4, TOP2A, RPS12, RPL21, PTBP1, RPL35A, RPL37A, RPLP2, RPS27A, RPL34, RPS23, CTDP1, POM121C, TARBP2, NELFB, MAP2K1, RAE1, JUN, EIF2AK4, TRIM32, RPS28	RPL39, MAP2K4, MON1B, RPL15, GTF2B, NUPL2, TRIM13, NUP35, NUP54, GTF2F2, NUP37, NUP205, ATG5, RPL36A, NUP88, ZNF639, SSB, FMR1, RPL17-C18orf32, RPL9, RPL17, CCNT1, POLR2A, HMGA2, NUP43, SP1, TRIM21, LEF1, CHD1
GO:0032274	gonadotropin secretion	5	2	0.03	6	0.00045	0.00045	0.3	0.75	The regulated release of a gonadotropin, any hormone that stimulates the gonads, especially follicle-stimulating hormone and luteinizing hormone	0.265573	0.265573	KISS1, SMAD4, FAM129B, TBX3	TMF1
GO:0043604	amide biosynthetic process	586	12	3.98	273	0.00049	0.10472	0.30625	1	The chemical reactions and pathways resulting in the formation of an amide, any derivative of an oxoacid in which an acidic hydroxy group has been replaced by an amino or substituted amino group	0.878405	-1.33289	CERS2, MEX3D, EEF2K, GTF2H3, RPSA, CYR61, RPL31, MTPN, IGFBP5, DEGS1, EIF2B1, TNRC6B, RPS10, MRPL54, RPS21, RPS19, NAGS, SECISBP2L, DAPK3, GGT7, LARP4, RPL10, UQCC2, PRKAA1, DDX6, GIGYF2, RPL41, RPS8, MRPS21, RPS29, ST3GAL5, RPS12, TGFB1, DNAJC3, RPL21, PTBP1, RPL35A, RPL37A, FOXO3, RPLP2, MTHFD2, RPS27A, ZNF598, SARS2, EIF1AX, SERP1, RPL22L1, RPL34, RPS23, ORMDL3, CHCHD1, NHP2, TNIP1, TARBP2, XR…	EIF3M, MRPS30, RPL39, GSPT1, NFE2L2, EIF3E, PAIP1, GSPT2, AASDH, RPL15, EIF2AK2, MRPL3, MRPL1, PPP1R15B, EIF2A, IARS, FAM129A, EEF1E1, IREB2, NPM1, NCK1, PUM2, ARG2, GCH1, EIF1B, C12orf65, EIF3J, RARS, DARS2, CAPRIN1, EIF3H, WARS2, EGFR, MTIF3, HNRNPR, RMND1, MRPS9, DDX5, RPL36A, TNRC6A, PRKRA, GARS, ALKBH1, MALSU1, YAE1D1, SSB, EIF4B, GGCT, FMR1, RC3H1, SPTSSA, DND1, RGS2, CNOT2, EIF4E, TARS, RP…
GO:0006612	protein targeting to membrane	155	6	1.05	1627	0.00061	1	0.358824	1	The process of directing proteins towards a membrane, usually using signals contained within the protein	0.671949	-1.00008	RPSA, RPL31, RPS10, RPS21, RPS19, RPL10, RAB8B, CDK5R1, RPL41, RPS8, RPS29, RPS12, RPL21, RPL35A, MIEF1, RPL37A, RPLP2, MIEF2, ATG4B, RPS27A, PACS2, RPL34, RPS23, PEX5, RPS28	SRP19, RPL39, RPL15, PEX3, NUP54, PRNP, SDCBP, GOLGA7, MFF, RPL36A, SRP72, SRP54, SRP14, RPL17-C18orf32, SRP9, ATG4A, RPL9, RPL17, MTCL1, C2CD5, TRAM1, SSR1, STOM, FYN
GO:0019083	viral transcription	164	6	1.11	7	0.00082	0.00082	0.455556	1	The process by which a viral genome, or part of a viral genome, is transcribed within the host cell	0.698558	-1.03228	CDK9, RPSA, RPL31, RPS10, RPS21, RPS19, RPL10, RPL41, RPS8, RPS29, TFAP4, RPS12, RPL21, RPL35A, RPL37A, RPLP2, RPS27A, RPL34, RPS23, CTDP1, POM121C, TARBP2, NELFB, RAE1, JUN, TRIM32, RPS28	RPL39, MON1B, RPL15, GTF2B, NUPL2, TRIM13, NUP35, NUP54, GTF2F2, NUP37, NUP205, RPL36A, NUP88, ZNF639, RPL17-C18orf32, RPL9, RPL17, CCNT1, POLR2A, HMGA2, NUP43, SP1, TRIM21, LEF1, CHD1
GO:0000447	endonucleolytic cleavage in ITS1 to sepa...	8	2	0.05	8	0.00124	0.00124	0.652632	1	Endonucleolytic cleavage between the SSU-rRNA and the 5.8S rRNA of an rRNA molecule originally produced as a tricistronic rRNA transcript that contained the Small SubUnit (SSU) rRNA, the 5.8S rRNA, and the Large SubUnit (LSU) rRNA, in that order, from 5' to 3' along the primary transcript	0.325592	0.325592	RPSA, RPS21, FCF1
GO:0031145	anaphase-promoting complex-dependent cat...	76	4	0.52	9	0.00172	0.00172	0.838095	1	The chemical reactions and pathways resulting in the breakdown of a protein or peptide by hydrolysis of its peptide bonds, initiated by the covalent attachment of ubiquitin, with ubiquitin-protein ligation catalyzed by the anaphase-promoting complex, and mediated by the proteasome	0.735663	-0.942602	PSMA6, SKP2, ANAPC7, UBC, ANAPC2, ANAPC11, FBXO31, PSMB10, RPS27A, CDK1, PSMA7	PSMD5, PSMD12, PSMA1, ANAPC10, PSMC6, CDC23, PSMA4, PSMD14, CDC27, PSMD6, UBE2E1, PSMD7
GO:0000956	nuclear-transcribed mRNA catabolic proce...	190	6	1.29	1628	0.00176	1	0.838095	1	The chemical reactions and pathways resulting in the breakdown of nuclear-transcribed mRNAs in eukaryotic cells	0.738539	-1.19018	EXOSC6, RPSA, RPL31, TNRC6B, RPS10, RPS21, RPS19, EDC3, RPL10, DDX6, RPL41, RPS8, RPS29, RPS12, LSM5, RPL21, RPL35A, THRAP3, RPL37A, RPLP2, RPS27A, RPL34, RPS23, XRN1, TNKS1BP1, EXOSC7, RPS28	RPL39, GSPT1, EIF3E, TENT2, PAIP1, DIS3, GSPT2, RPL15, UPF2, TTC37, LSM1, EXOSC3, DDX5, RPL36A, PPP2R2A, SSB, EIF4B, PNRC2, RC3H1, CNOT2, EIF4E, PATL1, CNOT1, RPL17-C18orf32, RPL9, RPL17, EIF4A2, ZFP36L1, EXOSC9, HBS1L, PABPC1, CNOT8, CNOT10, SMG8
GO:0031125	rRNA 3'-end processing	10	2	0.07	1629	0.00197	1	0.856522	1	Any process involved in forming the mature 3' end of an rRNA molecule	0.205085	0.205085	EXOSC6, RPSA, RPS21	EXOSC3
GO:0060561	apoptotic process involved in morphogene...	10	2	0.07	10	0.00197	0.00197	0.856522	1	Any apoptotic process that contributes to the shaping of an anatomical structure	0.214568	0.214568	CYR61, NOTCH1, SCRIB, VDR, BAK1	TGFB2, LEF1
GO:0019058	viral life cycle	346	8	2.35	694	0.00222	0.31475	0.896875	1	A set of processes which all viruses follow to ensure survival; includes attachment and entry of the virus particle, decoding of genome information, translation of viral mRNA by host ribosomes, genome replication, and assembly and release of viral particles containing the genome	0.820284	-1.27004	PKN2, CCNK, CDK9, RPSA, UBC, RPL31, RPS10, RPS21, RPS19, NOTCH1, TAP2, LDLR, TRIM5, RPL10, TAP1, DDX6, RPL41, RPS8, RPS29, P4HB, TFAP4, TOP2A, RPS12, SIVA1, ISG15, RPL21, PTBP1, RPL35A, RPL37A, MAVS, RPLP2, RPS27A, CHMP7, CHMP1A, RPL34, RPS23, CTDP1, POM121C, BANF1, TNIP1, HYAL2, TARBP2, NELFB, RAE1, JUN, PC, EIF2AK4, TRIM32, RPS28	ITGB1, XPR1, RPL39, MON1B, RPL15, EIF2AK2, GTF2B, VPS37A, SNX3, NUPL2, TRIM13, VTA1, NUP35, NUP54, GTF2F2, CHMP2B, WWP1, KPNA3, OAS3, AC068234.1, FAM111A, NUP37, NUP205, IFIT5, VAPA, DDX5, ATG5, RPL36A, SRPK1, RAB1A, NUP88, ZC3HAV1, ZNF639, SSB, DERL1, FMR1, YTHDC2, PDCD6IP, HACD3, CHMP3, RPL17-C18orf32, KPNA4, RPL9, THOC2, RPL17, AXL, HSPA8, PPID, PABPC1, CCNT1, UBP1, APOBEC3C, POLR2A, PPIA, HMG…
GO:0033108	mitochondrial respiratory chain complex ...	82	4	0.56	409	0.00227	0.16714	0.896875	1	The aggregation, arrangement and bonding together of a set of components to form a mitochondrial respiratory chain complex	0.610909	-0.661209	NDUFA11, NDUFA2, PET100, NDUFB2, UQCC2, NDUFA9, COX14, NDUFB6, TAZ, SURF1, IMMP2L, NDUFAF4	UQCRB, NDUFS1, AP003108.2, NDUFA12, NDUFAF6, NUBPL, SDHAF3, NDUFB1, COX20, NDUFA6, NDUFAF7
GO:0043603	cellular amide metabolic process	705	12	4.79	524	0.00243	0.22179	0.896875	1	The chemical reactions and pathways involving an amide, any derivative of an oxoacid in which an acidic hydroxy group has been replaced by an amino or substituted amino group, as carried out by individual cells	0.988471	-1.3597	ITGB8, CERS2, FTCD, MEX3D, EEF2K, GTF2H3, SLC25A32, RPSA, MTHFR, CYR61, RPL31, MTPN, IGFBP5, DEGS1, EIF2B1, TNRC6B, RPS10, MRPL54, RPS21, SLC19A1, RPS19, NAGS, SECISBP2L, DAPK3, GGT7, LARP4, RPL10, UQCC2, PRKAA1, LNPEP, SLC46A1, DDX6, GIGYF2, RPL41, RPS8, MRPS21, RPS29, ST3GAL5, RPS12, TGFB1, DNAJC3, RPL21, PTBP1, RPL35A, RPL37A, FOXO3, BTD, RPLP2, MTHFD2, STAT5B, RPS27A, ZNF598, SARS2, EIF1AX, S…	EIF3M, MRPS30, RPL39, GSPT1, CPD, NFE2L2, EIF3E, PAIP1, CPE, GSPT2, HSP90AA1, AASDH, RPL15, EIF2AK2, CPA3, MRPL3, MRPL1, PPP1R15B, EIF2A, NPEPPS, IARS, FAM129A, EEF1E1, IREB2, NPM1, NCK1, PUM2, ARG2, GCH1, EIF1B, C12orf65, EIF3J, RARS, ATP6AP2, DARS2, CAPRIN1, EIF3H, ALDH5A1, WARS2, EGFR, MTIF3, HNRNPR, RMND1, MCCC2, MRPS9, DDX5, RPL36A, TNRC6A, PRKRA, GARS, ALKBH1, PROS1, LAMP2, MALSU1, YAE1D1, …
GO:0006402	mRNA catabolic process	205	6	1.39	1630	0.00258	1	0.896875	1	The chemical reactions and pathways resulting in the breakdown of mRNA, messenger RNA, which is responsible for carrying the coded genetic 'message', transcribed from DNA, to sites of protein assembly at the ribosomes	0.768752	-1.19018	EXOSC6, PNPT1, RPSA, RPL31, TNRC6B, RPS10, RPS21, RPS19, EDC3, ZHX2, RPL10, DDX6, RPL41, RPS8, RPS29, RPS12, LSM5, RPL21, RPL35A, THRAP3, RPL37A, RNH1, RPLP2, RPS27A, RPL34, RPS23, XRN1, TNKS1BP1, EXOSC7, RPS28	RPL39, GSPT1, EIF3E, TENT2, PAIP1, DIS3, GSPT2, RPL15, UPF2, TTC37, LSM1, HNRNPR, EXOSC3, DDX5, RPL36A, PPP2R2A, ZC3HAV1, SSB, EIF4B, FMR1, PNRC2, RC3H1, CNOT2, EIF4E, PATL1, CNOT1, RPL17-C18orf32, SUPV3L1, RPL9, RPL17, ERN1, EIF4A2, ZFP36L1, EXOSC9, HBS1L, PABPC1, CNOT8, CNOT10, SMG8
GO:0006412	translation	526	10	3.57	809	0.00264	0.36248	0.896875	1	The cellular metabolic process in which a protein is formed, using the sequence of a mature mRNA molecule to specify the sequence of amino acids in a polypeptide chain. Translation is mediated by the ribosome, and begins with the formation of a ternary complex between aminoacylated initiator methionine tRNA, GTP, and initiation factor 2, which subsequently associates with the small subunit of the…	0.828242	-1.30229	MEX3D, EEF2K, GTF2H3, RPSA, RPL31, MTPN, IGFBP5, EIF2B1, TNRC6B, RPS10, MRPL54, RPS21, RPS19, SECISBP2L, DAPK3, LARP4, RPL10, UQCC2, DDX6, GIGYF2, RPL41, RPS8, MRPS21, RPS29, RPS12, TGFB1, DNAJC3, RPL21, PTBP1, RPL35A, RPL37A, FOXO3, RPLP2, RPS27A, ZNF598, SARS2, EIF1AX, SERP1, RPL22L1, RPL34, RPS23, CHCHD1, NHP2, TNIP1, TARBP2, XRN1, PTRH1, MAP2K1, ABTB1, MRPL23, EIF2AK4, RPS27L, AURKAIP1, MRPL4…	EIF3M, MRPS30, RPL39, GSPT1, EIF3E, PAIP1, GSPT2, RPL15, EIF2AK2, MRPL3, MRPL1, PPP1R15B, EIF2A, IARS, FAM129A, EEF1E1, IREB2, NPM1, NCK1, PUM2, EIF1B, C12orf65, EIF3J, RARS, DARS2, CAPRIN1, EIF3H, WARS2, EGFR, MTIF3, HNRNPR, RMND1, MRPS9, DDX5, RPL36A, TNRC6A, PRKRA, GARS, ALKBH1, MALSU1, YAE1D1, SSB, EIF4B, FMR1, RC3H1, DND1, RGS2, CNOT2, EIF4E, TARS, RPS6KB1, ABCE1, AC079447.1, MRPS27, MRPL39,…
GO:0006120	mitochondrial electron transport, NADH t...	42	3	0.29	11	0.00284	0.00284	0.896875	1	The transfer of electrons from NADH to ubiquinone that occurs during oxidative phosphorylation, mediated by the multisubunit enzyme known as complex I	0.500449	-0.413814	NDUFA11, NDUFA2, NDUFB2, NDUFA9, NDUFB6	NDUFS1, NDUFA12, NDUFB1, NDUFA6, DLD
GO:0000478	endonucleolytic cleavage involved in rRN...	12	2	0.08	1631	0.00287	1	0.896875	1	Any endonucleolytic cleavage involved in the conversion of a primary ribosomal RNA (rRNA) transcript into a mature rRNA molecule. Some endonucleolytic cleavages produce the mature end, while others are a step in the process of generating the mature end from the pre-rRNA	0.316584	0.103461	RPSA, RPS21, FCF1, BOP1
GO:0000479	endonucleolytic cleavage of tricistronic...	12	2	0.08	1632	0.00287	1	0.896875	1	Endonucleolytic cleavage of a pre-rRNA molecule originally produced as a tricistronic rRNA transcript that contains the Small SubUnit (SSU) rRNA, the 5.8S rRNA, and the Large SubUnit (LSU) rRNA, in that order, from 5' to 3' along the primary transcript. Primary ribosomal RNA transcripts with three genes, in this order, are produced in the nuclei of many eukaryotic species, including S. cerevisiae	0.316584	0.103461	RPSA, RPS21, FCF1, BOP1
GO:1902742	apoptotic process involved in developmen...	12	2	0.08	1633	0.00287	1	0.896875	1	Any apoptotic process that is involved in anatomical structure development	0.320516	0.0892278	CYR61, NOTCH1, SCRIB, VDR, BAK1	TGFB2, LEF1
GO:0006119	oxidative phosphorylation	90	4	0.61	608	0.00319	0.26909	0.941176	1	The phosphorylation of ADP to ATP that accompanies the oxidation of a metabolite through the operation of the respiratory chain. Oxidation of compounds establishes a proton gradient across the membrane, providing the energy for ATP synthesis	0.653625	-0.725681	NDUFA11, UQCRHL, NDUFA2, NDUFB2, MECP2, UQCC2, NDUFA9, UQCRQ, NDUFB6, COX10, CDK1, TAZ, SURF1	UQCRB, MSH2, NDUFS1, AP003108.2, ATP5F1C, PMPCB, NDUFA12, NDUFB1, SDHD, NDUFA6, DLD
GO:0043043	peptide biosynthetic process	540	10	3.67	846	0.0032	0.38614	0.941176	1	The chemical reactions and pathways resulting in the formation of peptides, compounds of 2 or more (but usually less than 100) amino acids where the alpha carboxyl group of one is bound to the alpha amino group of another. This may include the translation of a precursor protein and its subsequent processing into a functional peptide	0.828242	-1.33289	MEX3D, EEF2K, GTF2H3, RPSA, RPL31, MTPN, IGFBP5, EIF2B1, TNRC6B, RPS10, MRPL54, RPS21, RPS19, SECISBP2L, DAPK3, GGT7, LARP4, RPL10, UQCC2, DDX6, GIGYF2, RPL41, RPS8, MRPS21, RPS29, RPS12, TGFB1, DNAJC3, RPL21, PTBP1, RPL35A, RPL37A, FOXO3, RPLP2, RPS27A, ZNF598, SARS2, EIF1AX, SERP1, RPL22L1, RPL34, RPS23, CHCHD1, NHP2, TNIP1, TARBP2, XRN1, PTRH1, MAP2K1, CHAC1, ABTB1, GCLM, MRPL23, EIF2AK4, RPS2…	EIF3M, MRPS30, RPL39, GSPT1, NFE2L2, EIF3E, PAIP1, GSPT2, AASDH, RPL15, EIF2AK2, MRPL3, MRPL1, PPP1R15B, EIF2A, IARS, FAM129A, EEF1E1, IREB2, NPM1, NCK1, PUM2, EIF1B, C12orf65, EIF3J, RARS, DARS2, CAPRIN1, EIF3H, WARS2, EGFR, MTIF3, HNRNPR, RMND1, MRPS9, DDX5, RPL36A, TNRC6A, PRKRA, GARS, ALKBH1, MALSU1, YAE1D1, SSB, EIF4B, GGCT, FMR1, RC3H1, DND1, RGS2, CNOT2, EIF4E, TARS, RPS6KB1, ABCE1, AC0794…
GO:0042255	ribosome assembly	46	3	0.31	1634	0.00368	1	1	1	The aggregation, arrangement and bonding together of the mature ribosome and of its subunits	0.552769	-0.753921	RPSA, RPS10, RPS19, RPL10, DDX28, NOP53, RPS27L, RPS28	RPF1, BRIX1, EIF2A, NPM1, SBDS, MTERF3, FASTKD2
GO:0034655	nucleobase-containing compound catabolic...	299	7	2.03	1635	0.00396	1	1	1	The chemical reactions and pathways resulting in the breakdown of nucleobases, nucleosides, nucleotides and nucleic acids	0.80284	-1.32484	EXOSC6, PNPT1, RPSA, POP1, RPL31, PDE8A, TNRC6B, RPS10, DCTPP1, RPS21, RPS19, EDC3, ZHX2, RPL10, DNA2, DDX6, RPL41, RPS8, RPS29, ITPA, RPS12, LSM5, RPL21, RPL35A, THRAP3, NUDT18, SAMHD1, RPL37A, RNH1, NTHL1, RPLP2, RPS27A, PDE7A, DNASE1L2, RPL34, RPS23, HSF1, DPYD, PDE8B, DNASE1, XRN1, CASP3, TNKS1BP1, H1F0, EXOSC7, RPS28	RPL39, RNASEH2B, MTREX, GSPT1, EIF3E, TENT2, PAIP1, DIS3, GSPT2, RPL15, TATDN1, UPF2, TTC37, LSM1, HNRNPR, EXOSC3, DDX5, RPL36A, PPP2R2A, ZC3HAV1, SSB, EIF4B, FMR1, PNRC2, RC3H1, HPRT1, UNG, CNOT2, SETMAR, EIF4E, PATL1, CNOT1, NT5E, RPL17-C18orf32, SUPV3L1, RPL9, RPL17, ERN1, MBD4, EIF4A2, ZFP36L1, NUDT12, EXOSC9, HBS1L, PABPC1, APOBEC3C, HNRNPD, SMPDL3A, PPP1R8, EGLN1, OGG1, CNOT8, LRPPRC, CNOT1…
GO:0006401	RNA catabolic process	226	6	1.54	1636	0.00417	1	1	1	The chemical reactions and pathways resulting in the breakdown of RNA, ribonucleic acid, one of the two main type of nucleic acid, consisting of a long, unbranched macromolecule formed from ribonucleotides joined in 3',5'-phosphodiester linkage	0.789055	-1.32484	EXOSC6, PNPT1, RPSA, POP1, RPL31, TNRC6B, RPS10, RPS21, RPS19, EDC3, ZHX2, RPL10, DNA2, DDX6, RPL41, RPS8, RPS29, RPS12, LSM5, RPL21, RPL35A, THRAP3, RPL37A, RNH1, RPLP2, RPS27A, RPL34, RPS23, XRN1, TNKS1BP1, EXOSC7, RPS28	RPL39, RNASEH2B, MTREX, GSPT1, EIF3E, TENT2, PAIP1, DIS3, GSPT2, RPL15, UPF2, TTC37, LSM1, HNRNPR, EXOSC3, DDX5, RPL36A, PPP2R2A, ZC3HAV1, SSB, EIF4B, FMR1, PNRC2, RC3H1, CNOT2, EIF4E, PATL1, CNOT1, RPL17-C18orf32, SUPV3L1, RPL9, RPL17, ERN1, EIF4A2, ZFP36L1, EXOSC9, HBS1L, PABPC1, HNRNPD, PPP1R8, CNOT8, LRPPRC, CNOT10, SMG8
GO:0090150	establishment of protein localization to...	308	7	2.09	1376	0.00466	0.74121	1	1	The directed movement of a protein to a specific location in a membrane	0.800422	-1.36312	FAM126A, RPSA, RPL31, RAB26, RPS10, RPS21, RPS19, SCRIB, RPL10, RAB8B, CDK5R1, RPL41, RPS8, RPS29, EFR3A, RPS12, CDH1, CDH2, TOMM7, RPL21, RPL35A, MIEF1, MPP5, RPL37A, PPP2R5A, PPP3R1, RPLP2, MIEF2, ARHGAP44, ATG4B, RPS27A, EZR, PACS2, RER1, RPL34, RDX, PKDCC, RPS23, CNST, TSPAN15, BCL2L1, KIF13A, PEX5, ARF6, UBL4A, ARFRP1, VAMP5, RAB3GAP1, RPS28, CSK	ITGB1, SRP19, RPL39, LYPLA1, PIK3R1, RHOQ, HSP90AA1, RPL15, YWHAZ, REEP1, TMEM59, PEX3, RAB11A, NUP54, PRNP, GOLPH3L, BLZF1, YWHAH, CALM2, SDCBP, VAMP3, GOLGA7, EGFR, MFF, RPL36A, MAPK8, SRP72, RAB10, SRP54, SRP14, HSPA4, RPL17-C18orf32, SRP9, ATG4A, RPL9, RPL17, MTCL1, C2CD5, RAB8A, PLS1, PKP2, TRAM1, CLASP2, ACSL3, TIMM9, SSR1, STOM, RAB31, DYNLL2, FYN, CLIP1
GO:0044265	cellular macromolecule catabolic process	767	12	5.21	1499	0.00486	0.85539	1	1	The chemical reactions and pathways resulting in the breakdown of a macromolecule, any large molecule including proteins, nucleic acids and carbohydrates, as carried out by individual cells	0.981921	-1.52393	PSMA6, SKP2, EXOSC6, RNF6, KIF14, PNPT1, RPSA, ANAPC7, UBC, POP1, RPL31, SOCS4, SUFU, TNRC6B, RPS10, UBXN2A, RPS21, RNF166, RPS19, UFL1, ANAPC2, CBL, POMT2, FBXL19, EDC3, ZHX2, RPL10, UQCC2, DNA2, ANAPC11, DDX6, RPL41, RPS8, RPS29, TRPC4AP, RNF11, RPS12, FBXO31, EDEM1, GSK3B, CTSV, ISG15, DNAJC3, CCDC22, LSM5, USP3, PSMB10, RPL21, RPL35A, THRAP3, UBR2, RPL37A, RNH1, ZSWIM9, BAP1, CHEK2, RPLP2, RA…	PSMD5, UBE2D3, PPT1, OMA1, RPL39, RNASEH2B, MTREX, GSPT1, UCHL5, NFE2L2, EIF3E, PSMD12, USP25, TENT2, USP38, PAIP1, HPSE, DIS3, GSPT2, RPL15, BNIP3L, TMTC3, USP14, UBE2N, TMF1, TATDN1, VPS37A, RFFL, VPS36, PSMA1, USP9Y, ANAPC10, ZMPSTE24, TRIM13, SMURF2, SUMO1, TAF9, PSMC6, TOPORS, CRBN, WWP1, CDC23, PPP2R5C, UBE3A, UPF2, PSMA4, OPHN1, SDCBP, BBS7, TTC37, UBE2A, FBXW7, KLHL20, NGLY1, LSM1, HNRNPR…
GO:0006364	rRNA processing	234	6	1.59	158	0.00494	0.06098	1	1	Any process involved in the conversion of a primary ribosomal RNA (rRNA) transcript into one or more mature rRNA molecules	0.867013	-1.19386	NSUN5P2, EXOSC6, C1D, RPSA, RPL31, RPS10, RPS21, NSUN5P1, RPS19, DHX37, RPL10, RPL41, RPS8, RPS29, RPS12, NPM3, NSUN5, RPL21, RPL35A, RRNAD1, RPL37A, FCF1, RPLP2, RPS27A, UTP11, RPL34, RPS23, NHP2, BOP1, DDX49, EXOSC7, RPS28	RPL39, MTREX, RPF1, MPHOSPH10, DIS3, UTP3, RPL15, WDR75, MRPL1, DDX21, NOP58, SBDS, HEATR1, RRP15, EXOSC3, THUMPD1, MRPS9, RPL36A, TRMT61B, BMT2, MAK16, UTP4, NOL11, UTP15, FRG1, RPL17-C18orf32, RPL9, RPL17, IMP4, LTV1, EXOSC9, PNO1, MPHOSPH6, DCAF13, RPP38
GO:0000466	maturation of 5.8S rRNA from tricistroni...	16	2	0.11	1637	0.00513	1	1	1	Any process involved in the maturation of an rRNA molecule originally produced as part of a tricistronic rRNA transcript that contained the Small SubUnit (SSU) rRNA, the 5.8S rRNA, and the Large SubUnit (LSU) rRNA, in that order, from 5' to 3' along the primary transcript	0.358823	-0.0998551	RPSA, RPS21, FCF1, BOP1	EXOSC3
GO:0046700	heterocycle catabolic process	317	7	2.15	1638	0.00545	1	1	1	The chemical reactions and pathways resulting in the breakdown of heterocyclic compounds, those with a cyclic molecular structure and at least two different atoms in the ring (or rings)	0.836732	-1.32484	EXOSC6, FTCD, PNPT1, RPSA, POP1, RPL31, PDE8A, TNRC6B, RPS10, DCTPP1, RPS21, TET2, RPS19, EDC3, ZHX2, RPL10, DNA2, DDX6, RPL41, RPS8, RPS29, ITPA, RPS12, LSM5, RPL21, RPL35A, THRAP3, NUDT18, SAMHD1, RPL37A, RNH1, NTHL1, RPLP2, ALDH4A1, RPS27A, PDE7A, DNASE1L2, RPL34, RPS23, HSF1, DPYD, PDE8B, DNASE1, XRN1, CASP3, TNKS1BP1, H1F0, EXOSC7, RPS28	RPL39, RNASEH2B, MTREX, GSPT1, EIF3E, TENT2, PAIP1, DIS3, GSPT2, RPL15, TATDN1, UPF2, HNMT, TTC37, LSM1, HNRNPR, EXOSC3, DDX5, RPL36A, PPP2R2A, ZC3HAV1, SSB, EIF4B, FMR1, PNRC2, RC3H1, HPRT1, UNG, CNOT2, SETMAR, EIF4E, PATL1, CNOT1, NT5E, RPL17-C18orf32, SUPV3L1, RPL9, RPL17, ERN1, MBD4, EIF4A2, ZFP36L1, NUDT12, EXOSC9, HBS1L, PABPC1, APOBEC3C, HNRNPD, SMPDL3A, PPP1R8, EGLN1, OGG1, CNOT8, LRPPRC,…
GO:0044270	cellular nitrogen compound catabolic pro...	318	7	2.16	1639	0.00554	1	1	1	The chemical reactions and pathways resulting in the breakdown of organic and inorganic nitrogenous compounds	0.836732	-1.32484	EXOSC6, FTCD, PNPT1, RPSA, POP1, RPL31, PDE8A, TNRC6B, RPS10, DCTPP1, RPS21, TET2, RPS19, EDC3, ZHX2, RPL10, DNA2, DDX6, RPL41, RPS8, RPS29, TST, ITPA, RPS12, LSM5, RPL21, RPL35A, THRAP3, NUDT18, SAMHD1, RPL37A, RNH1, NTHL1, RPLP2, RPS27A, PDE7A, DNASE1L2, RPL34, RPS23, HSF1, DPYD, PDE8B, DNASE1, XRN1, CASP3, TNKS1BP1, H1F0, EXOSC7, RPS28	RPL39, RNASEH2B, MTREX, GSPT1, EIF3E, TENT2, PAIP1, DIS3, GSPT2, RPL15, TATDN1, UPF2, HNMT, TTC37, LSM1, HNRNPR, EXOSC3, DDX5, RPL36A, PPP2R2A, ZC3HAV1, SSB, EIF4B, FMR1, PNRC2, RC3H1, HPRT1, UNG, CNOT2, SETMAR, EIF4E, PATL1, CNOT1, NT5E, RPL17-C18orf32, SUPV3L1, RPL9, RPL17, ERN1, MBD4, EIF4A2, ZFP36L1, NUDT12, EXOSC9, HBS1L, PABPC1, APOBEC3C, HNRNPD, SMPDL3A, PPP1R8, EGLN1, OGG1, CNOT8, LRPPRC,…
GO:0042276	error-prone translesion synthesis	17	2	0.12	12	0.00579	0.00579	1	1	The conversion of DNA-damage induced single-stranded gaps into large molecular weight DNA after replication by using a specialized DNA polymerase or replication complex to insert a defined nucleotide across the lesion. This process does not remove the replication-blocking lesions and causes an increase in the endogenous mutation level. For example, in E. coli, a low fidelity DNA polymerase, pol V…	0.351356	-0.425235	UBC, RPA3, RPS27A, RFC1	POLE2, PCNA, RFC4
GO:0070987	error-free translesion synthesis	17	2	0.12	13	0.00579	0.00579	1	1	The conversion of DNA-damage induced single-stranded gaps into large molecular weight DNA after replication by using a specialized DNA polymerase or replication complex to insert a defined nucleotide across the lesion. This process does not remove the replication-blocking lesions but does not causes an increase in the endogenous mutation level. For S. cerevisiae, RAD30 encodes DNA polymerase eta,…	0.403036	-0.197685	UBC, RPA3, RPS27A, RFC1	PCNA, RFC4
GO:0010257	NADH dehydrogenase complex assembly	54	3	0.37	1640	0.00579	1	1	1	The aggregation, arrangement and bonding together of a set of components to form an NADH dehydrogenase complex	0.526055	-0.510887	NDUFA11, NDUFA2, NDUFB2, NDUFA9, NDUFB6, TAZ, NDUFAF4	NDUFS1, NDUFA12, NDUFAF6, NUBPL, NDUFB1, NDUFA6, NDUFAF7
GO:0032981	mitochondrial respiratory chain complex ...	54	3	0.37	14	0.00579	0.00579	1	1	The aggregation, arrangement and bonding together of a set of components to form mitochondrial respiratory chain complex I	0.526055	-0.510887	NDUFA11, NDUFA2, NDUFB2, NDUFA9, NDUFB6, TAZ, NDUFAF4	NDUFS1, NDUFA12, NDUFAF6, NUBPL, NDUFB1, NDUFA6, NDUFAF7
GO:0097031	mitochondrial respiratory chain complex ...	54	3	0.37	1641	0.00579	1	1	1	The biogenesis of a mitochondrial respiratory chain complex I, a protein complex located in the mitochondrial inner membrane that forms part of the mitochondrial respiratory chain. Includes the synthesis of constituent proteins and their aggregation, arrangement and bonding together	0.526055	-0.510887	NDUFA11, NDUFA2, NDUFB2, NDUFA9, NDUFB6, TAZ, NDUFAF4	NDUFS1, NDUFA12, NDUFAF6, NUBPL, NDUFB1, NDUFA6, NDUFAF7
GO:0019439	aromatic compound catabolic process	324	7	2.2	1642	0.00613	1	1	1	The chemical reactions and pathways resulting in the breakdown of aromatic compounds, any substance containing an aromatic carbon ring	0.836732	-1.32484	EXOSC6, FTCD, PNPT1, RPSA, POP1, RPL31, PDE8A, TNRC6B, RPS10, DCTPP1, RPS21, RPS19, EDC3, ZHX2, RPL10, DNA2, DDX6, RPL41, RPS8, RPS29, ITPA, RPS12, LSM5, RPL21, RPL35A, THRAP3, NUDT18, SAMHD1, RPL37A, RNH1, NTHL1, RPLP2, RPS27A, PDE7A, DNASE1L2, RPL34, RPS23, HSF1, DPYD, PDE8B, DNASE1, XRN1, CASP3, TNKS1BP1, H1F0, EXOSC7, RPS28	RPL39, RNASEH2B, MTREX, GSPT1, EIF3E, TENT2, PAIP1, DIS3, GSPT2, RPL15, TATDN1, UPF2, HNMT, TTC37, LSM1, HNRNPR, EXOSC3, DDX5, RPL36A, PPP2R2A, ZC3HAV1, SSB, EIF4B, FMR1, PNRC2, RC3H1, HPRT1, UNG, CNOT2, SETMAR, EIF4E, PATL1, CNOT1, NT5E, RPL17-C18orf32, SUPV3L1, RPL9, RPL17, ERN1, MBD4, EIF4A2, ZFP36L1, NUDT12, EXOSC9, HBS1L, PABPC1, APOBEC3C, HNRNPD, SMPDL3A, PPP1R8, EGLN1, PON2, OGG1, CNOT8, L…
GO:0010629	negative regulation of gene expression	1108	15	7.53	383	0.00615	0.15481	1	1	Any process that decreases the frequency, rate or extent of gene expression. Gene expression is the process in which a gene's coding sequence is converted into a mature gene product or products (proteins or RNA). This includes the production of an RNA transcript as well as any processing to produce a mature RNA product or an mRNA (for protein-coding genes) and the translation of that mRNA into pr…	1.14368	-1.57502	LRP8, ITGB8, KAT6A, KLF12, EXOSC6, SKIL, CNPY2, ATAD2B, MEX3D, H3F3A, KLF16, C1D, FZD8, HES6, PNPT1, ARHGAP35, CDK9, RPSA, HIST1H2AG, TSNAX, ZBTB18, TAF3, UBC, BAHD1, TAF9B, CREBZF, TBX2, GFI1, RPL31, GON4L, IGFBP5, IFI27, STRN3, PPM1F, HMG20A, SUFU, BRCA1, TNRC6B, RPS10, EGR1, SBNO2, AHR, SCMH1, RPS21, CBX6, NDFIP2, RPS19, DDX20, NOTCH1, RTF1, THRA, ATOH8, ZNF703, DAPK3, SMAD4, MDM4, LDLR, TNRC1…	FAM220A, ZNF675, HAT1, UBE2D3, THRB, RPL39, RNASEH2B, GSPT1, EPC1, RNF2, EIF3E, TENT2, PDCD10, WDR35, PAIP1, CREB1, DYRK1A, SIN3A, DIS3, ADNP, BAZ2A, ZBTB1, ZMYND11, GSPT2, RPL15, NFIL3, EIF2AK2, STAT1, ZNF224, IRF2, KDM5A, PTBP3, TMF1, AKIRIN2, GLIS3, ZNF567, EED, BTAF1, TMEM59, ZBTB33, COPS2, NUPL2, IREB2, TRIM13, SMURF2, SUMO1, UBA3, NCK1, IKZF4, RBAK, NUP35, PUM2, MBD2, TSN, NUP54, PRNP, NR2C…
GO:0072594	establishment of protein localization to...	501	9	3.4	1338	0.00633	0.71552	1	1	The directed movement of a protein to a specific location on or in an organelle. Encompasses establishment of localization in the membrane or lumen of a membrane-bounded organelle	0.79475	-1.42658	IPO4, PBLD, RPSA, RPL31, AP3D1, SUFU, RPS10, RPS21, NRAS, RPS19, KPNA6, WRAP53, TNPO2, DNAJC19, THRA, TOMM5, TSPO, SMAD4, SCRIB, DNLZ, RPL10, TOMM40L, SPHK1, AKR1C3, RAB8B, UBL5, RPL41, RPS8, RPS29, NLRP3, NFKBIE, TSPAN17, RPS12, VTI1A, CDH1, LEPROT, GSK3B, TGFB1, TOMM7, CCDC22, IFT122, MAPT, RPL21, RPL35A, NAGPA, LMNA, RPL37A, MAVS, BAP1, PPP3R1, RPLP2, SREBF1, PEX6, RPS27A, TSPAN10, CDK1, STIMA…	POT1, UBE2D3, SRP19, RPL39, NOV, TNPO1, PIK3R1, HSP90AA1, RPL15, YWHAZ, BNIP3L, CSNK2A2, VPS36, PEX3, WDR75, TOMM20, NPEPPS, NCOA4, NUP35, RAB11A, NUP54, AP3B1, AP3M1, KPNA3, HSPH1, PEX12, YWHAH, CALM2, HNMT, ZFAND6, DNAJA1, TCP1, FBXW7, EGFR, MFF, ZFYVE16, RAB6A, RPL36A, MAPK8, SRP72, NUP88, LAMP2, RAB10, SRP54, SH3GLB1, RANBP6, SRP14, PEX1, HSPA4, GREM1, SPCS2, RPL17-C18orf32, MED1, KPNA4, PEX2…
GO:0043628	ncRNA 3'-end processing	18	2	0.12	1643	0.00648	1	1	1	Any process involved in forming the mature 3' end of a non-coding RNA molecule	0.370439	-0.294564	EXOSC6, RPSA, RPS21	INTS7, EXOSC3, SSB
GO:0006091	generation of precursor metabolites and ...	249	6	1.69	368	0.00666	0.15074	1	1	The chemical reactions and pathways resulting in the formation of precursor metabolites, substances from which energy is derived, and any process involved in the liberation of energy from these substances	0.829261	-0.924168	PPP1R3D, D2HGDH, PNPT1, NDUFA11, THTPA, UQCRHL, UBC, NDUFA2, PYGB, NDUFB2, PFKFB4, MECP2, UQCC2, PRKAA1, STK40, NDUFA9, GSK3B, UQCRQ, NDUFB6, COX10, STBD1, RPS27A, SIRT6, CDK1, HIF1A, OGDH, TBRG4, TAZ, IRS1, FDXR, C1QTNF2, SURF1, IMMP2L	UGP2, UQCRB, FASTKD3, MSH2, NDUFS1, CALM2, AP003108.2, ALDH5A1, ATP5F1C, IDH3A, PMPCB, NDUFA12, GFPT1, PPP1R3E, NNT, GYG1, BPGM, PDHB, ETFDH, NOA1, SLC25A13, NDUFB1, FASTKD2, PPP1CC, GAPDH, COX20, PANK2, SDHD, NDUFA6, AK9, PGM2, PYGL, DLD
GO:0002041	intussusceptive angiogenesis	1	1	0.01	15	0.0068	0.0068	1	1	The formation of new blood vessels as a result of the insertion and extension of lumenal tissue pillars	0.792564	0.792564	CYR61
GO:0006253	dCTP catabolic process	1	1	0.01	16	0.0068	0.0068	1	1	The chemical reactions and pathways resulting in the breakdown of dCTP, deoxycytidine triphosphate	0.708568	0.708568	DCTPP1
GO:0009149	pyrimidine nucleoside triphosphate catab...	1	1	0.01	1644	0.0068	1	1	1	The chemical reactions and pathways resulting in the breakdown of pyrimidine nucleoside triphosphate, a compound consisting of a pyrimidine base linked to a ribose or deoxyribose sugar esterified with triphosphate on the sugar	0.708568	0.708568	DCTPP1
GO:0009213	pyrimidine deoxyribonucleoside triphosph...	1	1	0.01	1645	0.0068	1	1	1	The chemical reactions and pathways resulting in the breakdown of pyrimidine deoxyribonucleoside triphosphate, a compound consisting of a pyrimidine base linked to a deoxyribose sugar esterified with triphosphate on the sugar	0.708568	0.708568	DCTPP1
GO:0032203	telomere formation via telomerase	1	1	0.01	17	0.0068	0.0068	1	1	The addition of telomeric repeats to a non-telomeric double-stranded DNA end by telomerase	0.678214	0.678214	WRAP53
GO:0034337	RNA folding	1	1	0.01	18	0.0068	0.0068	1	1	The process of assisting in the covalent and noncovalent assembly of single or multimeric RNAs into the correct tertiary structure	0.612157	0.612157	FAM129B
GO:0044028	DNA hypomethylation	1	1	0.01	1646	0.0068	1	1	1	An decrease in the epigenetic methylation of cytosine and adenosine residues in DNA	0.612157	0.612157	FAM129B
GO:0044029	hypomethylation of CpG island	1	1	0.01	19	0.0068	0.0068	1	1	An decrease in the epigenetic methylation of cytosine and adenosine residues in a CpG island in DNA. CpG islands are genomic regions that contain a high frequency of the CG dinucleotide and are often associated with the transcription start site of genes	0.612157	0.612157	FAM129B
GO:0046065	dCTP metabolic process	1	1	0.01	1647	0.0068	1	1	1	The chemical reactions and pathways involving dCTP, deoxycytidine triphosphate	0.708568	0.708568	DCTPP1
GO:0060112	generation of ovulation cycle rhythm	1	1	0.01	20	0.0068	0.0068	1	1	The process which controls the timing of the type of sexual cycle seen in female mammals	0.686955	0.686955	KISS1
GO:0060265	positive regulation of respiratory burst...	1	1	0.01	21	0.0068	0.0068	1	1	Any process that increases the rate, frequency or extent of a phase of elevated metabolic activity, during which oxygen consumption increases made as a defense response ; this leads to the production, by an NADH dependent system, of hydrogen peroxide (H2O2), superoxide anions and hydroxyl radicals	0.682527	0.682527	RPS19
GO:0098968	neurotransmitter receptor transport post...	1	1	0.01	22	0.0068	0.0068	1	1		0.636572	0.636572	SCRIB
GO:1901361	organic cyclic compound catabolic proces...	332	7	2.26	1648	0.00698	1	1	1	The chemical reactions and pathways resulting in the breakdown of organic cyclic compound	0.836732	-1.32484	EXOSC6, FTCD, PNPT1, RPSA, POP1, RPL31, PDE8A, TNRC6B, RPS10, DCTPP1, RPS21, TET2, RPS19, EDC3, ZHX2, RPL10, DNA2, DDX6, RPL41, RPS8, RPS29, ITPA, RPS12, LSM5, RPL21, RPL35A, THRAP3, NUDT18, SAMHD1, RPL37A, RNH1, NTHL1, RPLP2, SNX17, ALDH4A1, RPS27A, PDE7A, DNASE1L2, RPL34, RPS23, HSF1, DPYD, PDE8B, DNASE1, XRN1, CASP3, TNKS1BP1, H1F0, EXOSC7, RPS28	RPL39, RNASEH2B, MTREX, GSPT1, EIF3E, TENT2, PAIP1, DIS3, GSPT2, RPL15, TATDN1, UPF2, YWHAH, HNMT, TTC37, LSM1, HNRNPR, EXOSC3, DDX5, RPL36A, SPP1, HSD17B11, PPP2R2A, ZC3HAV1, SSB, EIF4B, FMR1, PNRC2, RC3H1, HPRT1, UNG, CNOT2, SETMAR, EIF4E, PATL1, CNOT1, NT5E, RPL17-C18orf32, SUPV3L1, RPL9, RPL17, ERN1, MBD4, EIF4A2, ZFP36L1, NUDT12, EXOSC9, HBS1L, PABPC1, APOBEC3C, HNRNPD, SMPDL3A, PPP1R8, EGLN…
GO:0048519	negative regulation of biological proces...	2853	29	19.39	139	0.00716	0.05555	1	1	Any process that stops, prevents, or reduces the frequency, rate or extent of a biological process. Biological processes are regulated by many means; examples include the control of gene expression, protein modification or interaction with a protein or substrate molecule	1.25262	-1.79969	ADAMTS1, LRP8, ITGB8, PSMA6, KAT6A, FGFR3, CERS2, KLF12, EXOSC6, SKIL, RNF6, CNPY2, ATAD2B, KIF14, VPS13C, TIE1, SOCS7, MEX3D, CCNK, EEF2K, SSTR1, H3F3A, TAX1BP3, SH3RF1, VILL, NPAT, KLF16, TOB2, C1D, FZD8, PRKAR2B, CDYL, SOD2, HES6, PNPT1, ARHGAP35, PIDD1, MAK, PBLD, CDK9, RPSA, HIST1H2AG, SH3RF2, TSNAX, PRKAR1B, ZBTB18, ANAPC7, TAF3, UBC, BAHD1, TAF9B, MC1R, WDR81, CREBZF, PREX1, TBX2, GFI1, CY…	POT1, ITGB1, FAM220A, PSMD5, ZNF675, HAT1, UBE2D3, PPT1, OMA1, ARRDC3, THRB, TERF2IP, MTBP, DVL3, RPL39, LYPLA1, RNASEH2B, GSPT1, EPC1, LINC02210-CRHR1, NOV, RNF2, UCHL5, NFE2L2, HIGD1A, EIF3E, NRK, PSMD12, USP25, TENT2, PDCD10, SNX13, WDR35, PAIP1, LRRC17, GDF11, CREB1, PIK3R1, AZIN1, RHOQ, MARCH7, MPHOSPH10, DYRK1A, SIN3A, DIS3, ADNP, BAZ2A, PTPN12, MAP2K4, ITM2B, PFN2, GPAM, ZBTB1, ZMYND11, GS…
GO:0034622	cellular macromolecular complex assembly	708	11	4.81	808	0.00746	0.36233	1	1	The aggregation, arrangement and bonding together of a set of macromolecules to form a complex, carried out at the cellular level	1.02274	-1.51107	KAT6A, IPO4, NUFIP1, MZT1, SNAP29, ARHGAP18, H3F3A, VILL, GTF2H3, NDUFA11, RPSA, UBC, TAF9B, PREX1, SPIRE2, MTPN, BIN1, FCHSD2, RPA3, COBLL1, TAF4, PRKCE, WASF3, HIST1H2BJ, RPS10, NDUFA2, PET100, MYOM2, RPS19, DDX20, ARPC1B, NDUFB2, SLAIN2, ARFIP1, THRA, ARMC4, SMAD4, MECP2, EDC3, RPL10, UQCC2, H1FX, DDX6, KAT6B, NLRP3, NDUFA9, COX14, CTTN, BRF1, DDX28, TGFB1, SNAP23, TSPYL4, NDUFB6, MAPT, MCM2, …	CETN2, PSMD5, DNAJC28, HAT1, SLU7, SRP19, RPF1, BRIX1, CREB1, ARPC5, ITGB3BP, CENPQ, PFN2, HSP90AA1, UQCRB, EIF2AK2, GTF2B, PTGES3, DNM1L, NAP1L1, RASA1, RTN4, TOMM20, EIF2A, NPM1, NCK1, PUM2, TAF9, MBD2, PSMC6, PSMG1, SBDS, ATPAF1, NDUFS1, CAPZA1, TMOD1, STRAP, CAPZA2, MNAT1, SEC24B, CENPI, GTF2H1, AP003108.2, CCNH, PSMG2, TCP1, VAMP3, MTERF3, NUP205, EXOC8, SENP6, DNAAF5, SRPK1, SET, RAB1A, NDU…
GO:0009057	macromolecule catabolic process	918	13	6.24	1436	0.0077	0.80428	1	1	The chemical reactions and pathways resulting in the breakdown of a macromolecule, any molecule of high relative molecular mass, the structure of which essentially comprises the multiple repetition of units derived, actually or conceptually, from molecules of low relative molecular mass	1.04248	-1.53982	PSMA6, SKP2, EGLN2, EXOSC6, RNF6, KIF14, GPC2, PPP1R3D, PNPT1, RPSA, ANAPC7, UBC, POP1, ADAM9, RPL31, SOCS4, SUFU, TNRC6B, RPS10, PTPN3, UBXN2A, RPS21, RNF166, RPS19, PYGB, UFL1, ANAPC2, CBL, MDM4, LDLR, POMT2, FBXL19, EDC3, ZHX2, RPL10, UQCC2, DNA2, ANAPC11, LNPEP, DDX6, RPL41, RPS8, RPS29, TRPC4AP, RNF11, RPS12, FBXO31, EDEM1, GSK3B, CTSV, ISG15, CSPG4, TGFB1, DNAJC3, CCDC22, LSM5, USP3, PSMB10…	PSMD5, UBE2D3, PPT1, OMA1, RPL39, LYPLA1, RNASEH2B, MTREX, GSPT1, UCHL5, NFE2L2, EIF3E, PSMD12, USP25, TENT2, USP38, PAIP1, AZIN1, HPSE, DIS3, GSPT2, FMN2, HSP90AA1, RPL15, BNIP3L, TMTC3, USP14, UBE2N, TMF1, TATDN1, VPS37A, RFFL, HMMR, VPS36, PSMA1, USP9Y, ANAPC10, LUM, SNX3, ZMPSTE24, TRIM13, SMURF2, SUMO1, LYPLAL1, TAF9, PSMC6, TOPORS, CRBN, WWP1, CDC23, PPP2R5C, UBE3A, UPF2, PSMA4, CALM2, OPHN…
GO:0006297	nucleotide-excision repair, DNA gap fill...	20	2	0.14	23	0.00798	0.00798	1	1	Repair of the gap in the DNA helix by DNA polymerase and DNA ligase after the portion of the strand containing the lesion has been removed by pyrimidine-dimer repair enzymes	0.419256	-0.257344	UBC, RPA3, RPS27A, RFC1	PCNA, RFC4, POLD3
GO:0060986	endocrine hormone secretion	20	2	0.14	1649	0.00798	1	1	1	The regulated release of a hormone into the circulatory system	0.450328	-0.579076	KISS1, RAB11FIP5, SMAD4, FAM129B, RAB8B, TBX3	LINC02210-CRHR1, TMF1, NKX3-1, AGTR1, IL1B
GO:0006518	peptide metabolic process	616	10	4.19	1045	0.00804	0.50981	1	1	The chemical reactions and pathways involving peptides, compounds of two or more amino acids where the alpha carboxyl group of one is bound to the alpha amino group of another	0.828242	-1.3597	MEX3D, EEF2K, GTF2H3, RPSA, RPL31, MTPN, IGFBP5, EIF2B1, TNRC6B, RPS10, MRPL54, RPS21, RPS19, SECISBP2L, DAPK3, GGT7, LARP4, RPL10, UQCC2, LNPEP, DDX6, GIGYF2, RPL41, RPS8, MRPS21, RPS29, RPS12, TGFB1, DNAJC3, RPL21, PTBP1, RPL35A, RPL37A, FOXO3, RPLP2, RPS27A, ZNF598, SARS2, EIF1AX, SERP1, RPL22L1, RPL34, RPS23, CHCHD1, NHP2, TNIP1, TARBP2, XRN1, PTRH1, MAP2K1, CHAC1, ABTB1, GCLM, MRPL23, EIF2AK…	EIF3M, MRPS30, RPL39, GSPT1, CPD, NFE2L2, EIF3E, PAIP1, CPE, GSPT2, HSP90AA1, AASDH, RPL15, EIF2AK2, CPA3, MRPL3, MRPL1, PPP1R15B, EIF2A, NPEPPS, IARS, FAM129A, EEF1E1, IREB2, NPM1, NCK1, PUM2, EIF1B, C12orf65, EIF3J, RARS, ATP6AP2, DARS2, CAPRIN1, EIF3H, ALDH5A1, WARS2, EGFR, MTIF3, HNRNPR, RMND1, MRPS9, DDX5, RPL36A, TNRC6A, PRKRA, GARS, ALKBH1, PROS1, LAMP2, MALSU1, YAE1D1, SSB, EIF4B, GGCT, F…
GO:0016072	rRNA metabolic process	262	6	1.78	224	0.00846	0.08545	1	1	The chemical reactions and pathways involving rRNA, ribosomal RNA, a structural constituent of ribosomes	0.867013	-1.19386	NSUN5P2, EXOSC6, C1D, RPSA, RPL31, RPS10, RPS21, NSUN5P1, RPS19, DHX37, RNASEK, RPL10, RPL41, RPS8, RPS29, BRF1, RPS12, NPM3, NSUN5, RPL21, RPL35A, RRNAD1, RPL37A, FCF1, RPLP2, RPS27A, UTP11, RPL34, RPS23, NHP2, BOP1, GTF3C1, CD3EAP, XRN1, DDX49, EXOSC7, RPS28	RPL39, MTREX, RPF1, MPHOSPH10, DIS3, UTP3, RPL15, WDR75, MRPL1, DDX21, NOP58, SBDS, NIFK, HEATR1, RRP15, EXOSC3, THUMPD1, MRPS9, RPL36A, TRMT61B, BMT2, MAK16, UTP4, NOL11, UTP15, FRG1, RPL17-C18orf32, RPL9, RPL17, IMP4, LTV1, EXOSC9, PNO1, MPHOSPH6, DCAF13, RPP38
GO:0000469	cleavage involved in rRNA processing	21	2	0.14	1650	0.00878	1	1	1	Any phosphodiester bond hydrolysis involved in the conversion of a primary ribosomal RNA (rRNA) transcript into a mature rRNA molecule	0.399134	-0.286319	RPSA, RPS21, FCF1, NHP2, BOP1	MRPL1, EXOSC3
GO:0043954	cellular component maintenance	23	2	0.16	24	0.01049	0.01049	1	1	The organization process that preserves a cellular component in a stable functional or structural state	0.429084	-0.579856	MTHFR, KIFC3, SUPT6H, CTTN, LNPK	TANC1, PRNP, C1QL1, PLEKHA7, SUPV3L1, RASSF8, PKP2, FYN
GO:0015980	energy derivation by oxidation of organi...	197	5	1.34	607	0.01066	0.26654	1	1	The chemical reactions and pathways by which a cell derives energy from organic compounds; results in the oxidation of the compounds from which energy is released	0.805819	-0.885339	PPP1R3D, D2HGDH, PNPT1, NDUFA11, UQCRHL, UBC, NDUFA2, PYGB, NDUFB2, MECP2, STK40, NDUFA9, GSK3B, UQCRQ, NDUFB6, COX10, STBD1, RPS27A, CDK1, HIF1A, OGDH, TBRG4, TAZ, IRS1, C1QTNF2, SURF1, IMMP2L	UGP2, UQCRB, FASTKD3, NDUFS1, CALM2, AP003108.2, ALDH5A1, IDH3A, PMPCB, NDUFA12, GFPT1, PPP1R3E, NNT, GYG1, PDHB, ETFDH, NOA1, SLC25A13, NDUFB1, FASTKD2, PPP1CC, COX20, PANK2, SDHD, NDUFA6, PGM2, PYGL, DLD
GO:0070979	protein K11-linked ubiquitination	24	2	0.16	26	0.01139	0.01139	1	1	A protein ubiquitination process in which ubiquitin monomers are attached to a protein, and then ubiquitin polymers are formed by linkages between lysine residues at position 11 of the ubiquitin monomers. K11-linked polyubiquitination targets the substrate protein for degradation. The anaphase-promoting complex promotes the degradation of mitotic regulators by assembling K11-linked polyubiquitin …	0.33866	-0.695291	ANAPC7, ANAPC2, ANAPC11	UBE2D3, ANAPC10, CDC23, UBE2A, ANAPC13, UBE2E2, CDC27, UBE2E3
GO:0051436	negative regulation of ubiquitin-protein...	70	3	0.48	27	0.01184	0.01184	1	1	Any process that stops, prevents, or reduces the frequency, rate or extent of ubiquitin ligase activity that contributes to the mitotic cell cycle	0.644813	-0.942602	PSMA6, ANAPC7, UBC, ANAPC2, ANAPC11, PSMB10, RPS27A, CDK1, PSMA7	PSMD5, PSMD12, PSMA1, ANAPC10, PSMC6, CDC23, PSMA4, PSMD14, CDC27, PSMD6, UBE2E1, PSMD7
GO:0051641	cellular localization	1787	20	12.14	511	0.01206	0.21716	1	1	A localization process that takes place at the cellular level; as a result of a cellular localization process, a substance or cellular entity, such as a protein complex or organelle, is transported to, and/or maintained in, a specific location within or in the membrane of a cell	1.06954	-1.81878	FAM126A, IPO4, MZT1, KIF14, VPS13C, MEX3D, SNAP29, TAX1BP3, SYTL3, CDC40, TPGS1, MAK, PBLD, DNAJC6, TOM1, RPSA, TIAM1, TLN2, TAF3, UBC, LIN7C, TUB, SPIRE2, RPL31, RAB26, LAMTOR4, BIN1, CLUH, PRKCE, IFI27, HOOK3, AP3D1, SUFU, CCNE2, MRAP, PPFIA3, RPS10, WDR33, STX16, DCTN5, ZNF593, AKAP13, SNX8, RPS21, TBC1D14, NRAS, TAF8, RPS19, DDX20, KPNA6, WRAP53, CRIPT, BORCS6, SYT11, GGA2, SAR1B, MYO5A, ARFI…	POT1, NEDD1, ITGB1, GEM, UBE2D3, PPT1, SLU7, TERF2IP, SRP19, MTBP, DVL3, RPL39, LYPLA1, NOV, TNPO1, SEC31A, PDCD10, RPGR, SNX13, WDR35, COG5, TRAPPC6B, PIK3R1, RHOQ, RABGAP1L, TMEM167A, SIN3A, CENPQ, CPE, PFN2, FMN2, HSP90AA1, RPL15, YWHAZ, REEP1, DCTN4, BNIP3L, DST, DNM1L, LYN, IFT74, SNX2, NUSAP1, VPS37A, CSNK2A2, KDELR3, TMEM59, VPS36, DYNC1LI1, PEX3, RTN4, WDR75, TOMM20, ERO1A, SNX3, NPEPPS, …
GO:0042254	ribosome biogenesis	284	6	1.93	1040	0.0123	0.50443	1	1	A cellular process that results in the biosynthesis of constituent macromolecules, assembly, and arrangement of constituent parts of ribosome subunits; includes transport to the sites of protein synthesis	0.874758	-1.21883	NSUN5P2, EXOSC6, C1D, RPSA, RPL31, RPS10, ZNF593, RPS21, NSUN5P1, RPS19, DHX37, RPL10, RPL41, RPS8, RPS29, RPS12, DDX28, NPM3, NSUN5, RPL21, RPL35A, NOP53, RRNAD1, RPL37A, FCF1, RPLP2, URB2, RPS27A, UTP11, RPL34, RPS23, NHP2, BOP1, RPS27L, AAMP, DDX49, EXOSC7, RPS28	RPL39, MTREX, RPF1, BRIX1, MPHOSPH10, DIS3, UTP3, RPL15, WDR75, MRPL1, EIF2A, DDX21, NPM1, NOP58, SBDS, HEATR1, RRP15, MTERF3, EXOSC3, THUMPD1, MRPS9, RPL36A, SDAD1, TRMT61B, NUP88, MALSU1, YAE1D1, BMT2, MAK16, UTP4, NOL11, UTP15, ABCE1, FRG1, RPL17-C18orf32, RPL9, RPL17, IMP4, LTV1, ZNHIT6, EXOSC9, FASTKD2, RIOX2, PNO1, MPHOSPH6, DCAF13, GNL3L, RPP38
GO:0051439	regulation of ubiquitin-protein ligase a...	71	3	0.48	28	0.0123	0.0123	1	1	A cell cycle process that modulates the frequency, rate or extent of ubiquitin ligase activity that contributes to the mitotic cell cycle	0.644813	-0.942602	PSMA6, ANAPC7, UBC, ANAPC2, ANAPC11, PSMB10, RPS27A, CDK1, PSMA7	PSMD5, PSMD12, PSMA1, ANAPC10, PSMC6, CDC23, PSMA4, PSMD14, CDC27, PSMD6, UBE2E1, PSMD7
GO:0048641	regulation of skeletal muscle tissue dev...	25	2	0.17	29	0.01233	0.01233	1	1	Any process that modulates the frequency, rate or extent of skeletal muscle tissue development	0.481241	-0.317807	UQCC2, PRKAA1, FAM129B, TSC22D3, TGFB1, NR1D2, HMGCR, WNT10B	DDX5, DDX17, RPS6KB1, DKK1
GO:0070727	cellular macromolecule localization	1315	16	8.94	712	0.0126	0.32091	1	1	Any process in which a macromolecule is transported to, and/or maintained in, a specific location at the level of a cell. Localization at the cellular level encompasses movement within the cell, from within the cell to the cell surface, or from one location to another at the surface of a cell	1.02963	-1.75359	FAM126A, IPO4, MZT1, MEX3D, TAX1BP3, SYTL3, CDC40, MAK, PBLD, TOM1, RPSA, TIAM1, TLN2, TAF3, LIN7C, TUB, RPL31, RAB26, LAMTOR4, PRKCE, IFI27, HOOK3, AP3D1, SUFU, CCNE2, MRAP, RPS10, WDR33, STX16, ZNF593, SNX8, RPS21, TBC1D14, NRAS, TAF8, RPS19, KPNA6, WRAP53, CRIPT, SYT11, GGA2, SAR1B, MYO5A, ARFIP1, TNPO2, DNAJC19, THRA, TOMM5, TSPO, TAP2, RAB11FIP5, SMAD4, SCRIB, DNLZ, SUPT6H, STX18, RPL10, KIA…	POT1, NEDD1, ITGB1, UBE2D3, SLU7, TERF2IP, SRP19, MTBP, DVL3, RPL39, LYPLA1, NOV, TNPO1, RPGR, SNX13, WDR35, PIK3R1, RHOQ, RABGAP1L, SIN3A, CENPQ, CPE, HSP90AA1, RPL15, YWHAZ, REEP1, BNIP3L, DNM1L, IFT74, SNX2, CSNK2A2, KDELR3, TMEM59, VPS36, PEX3, RTN4, WDR75, TOMM20, NPEPPS, NUPL2, SUMO1, NPM1, NCOA4, NUP35, RAB11A, NUP54, PRNP, AP3B1, LEPROTL1, TOPORS, AP3M1, XPOT, KPNA3, HSPH1, GOLPH3L, BLZF1…
GO:0009126	purine nucleoside monophosphate metaboli...	208	5	1.41	646	0.01325	0.29312	1	1	The chemical reactions and pathways involving purine nucleoside monophosphate, a compound consisting of a purine base linked to a ribose or deoxyribose sugar esterified with phosphate on the sugar	0.708777	-0.920917	NDUFA11, UQCRHL, ADSS, NDUFA2, NDUFB2, FIGNL1, PFKFB4, TSPO, SCRIB, MECP2, UQCC2, PRKAA1, NDUFA9, IMPDH1, FLCN, UQCRQ, TGFB1, NDUFB6, CASK, COX10, SIRT6, PARG, CDK1, HIF1A, OGDH, TAZ, SURF1	ATP5F1EP2, UQCRB, DNM1L, MSH2, NDUFS1, AP003108.2, ATP5F1C, PMPCB, AK3, NDUFA12, HPRT1, NT5E, BPGM, PRPS1, SLC25A13, HSPA8, NDUFB1, GAPDH, SDHD, NDUFA6, AK9, PAICS, NDUFAF7, NMNAT1, DLD
GO:0009167	purine ribonucleoside monophosphate meta...	208	5	1.41	647	0.01325	0.29312	1	1	The chemical reactions and pathways involving purine ribonucleoside monophosphate, a compound consisting of a purine base linked to a ribose sugar esterified with phosphate on the sugar	0.708777	-0.920917	NDUFA11, UQCRHL, ADSS, NDUFA2, NDUFB2, FIGNL1, PFKFB4, TSPO, SCRIB, MECP2, UQCC2, PRKAA1, NDUFA9, IMPDH1, FLCN, UQCRQ, TGFB1, NDUFB6, CASK, COX10, SIRT6, PARG, CDK1, HIF1A, OGDH, TAZ, SURF1	ATP5F1EP2, UQCRB, DNM1L, MSH2, NDUFS1, AP003108.2, ATP5F1C, PMPCB, AK3, NDUFA12, HPRT1, NT5E, BPGM, PRPS1, SLC25A13, HSPA8, NDUFB1, GAPDH, SDHD, NDUFA6, AK9, PAICS, NDUFAF7, NMNAT1, DLD
GO:0000460	maturation of 5.8S rRNA	26	2	0.18	1651	0.0133	1	1	1	Any process involved in the maturation of a precursor 5.8S ribosomal RNA (rRNA) molecule into a mature 5.8S rRNA molecule	0.468775	-0.630544	C1D, RPSA, RPS21, FCF1, BOP1	MTREX, RPF1, RRP15, EXOSC3, MAK16, MPHOSPH6
GO:0006294	nucleotide-excision repair, preincision ...	26	2	0.18	30	0.0133	0.0133	1	1	The aggregation, arrangement and bonding together of proteins on DNA to form the multiprotein complex involved in damage recognition, DNA helix unwinding, and endonucleolytic cleavage at the site of DNA damage. This assembly occurs before the phosphodiester backbone of the damaged strand is cleaved 3' and 5' of the site of DNA damage	0.493059	-0.545502	GTF2H3, UBC, RPA3, RPS27A	CETN2, MNAT1, GTF2H1, CCNH
GO:0002536	respiratory burst involved in inflammato...	2	1	0.01	1652	0.01355	1	1	1	A phase of elevated metabolic activity, during which oxygen consumption increases following a stimulus as part of an inflammatory response; this leads to the production, by an NADH dependent system, of hydrogen peroxide (H2O2), superoxide anions and hydroxyl radicals, resulting in an increase in their intracellular or extracellular levels	0.607536	0.607536	RPS19, DUSP10
GO:0003278	apoptotic process involved in heart morp...	2	1	0.01	31	0.01355	0.01355	1	1	Any apoptotic process that contributes to the shaping of the heart	0.175968	0.175968	CYR61	TGFB2
GO:0006407	rRNA export from nucleus	2	1	0.01	32	0.01355	0.01355	1	1	The directed movement of rRNA from the nucleus to the cytoplasm; the rRNA is usually in the form of ribonucleoproteins	0.256601	0.256601	RPSA
GO:0010609	mRNA localization resulting in posttrans...	2	1	0.01	33	0.01355	0.01355	1	1	Any process that modulates the frequency, rate or extent of gene expression after the production of a mRNA transcript by its transport into, or maintainance in, a specific location within the cell	0.448444	0.448444	MEX3D
GO:0010643	cell communication by chemical coupling	2	1	0.01	34	0.01355	0.01355	1	1	The process that mediates signaling interactions between one cell and another cell by the transfer of small, water-soluble molecules or metabolites between their adjacent cytoplasms via intercellular protein channels	0.0311901	0.0311901	DBN1	GJA1
GO:0016080	synaptic vesicle targeting	2	1	0.01	35	0.01355	0.01355	1	1	The process in which synaptic vesicles are directed to specific destination membranes, mediated by molecules at the vesicle membrane and target membrane surfaces	0.150877	0.150877	SCRIB
GO:0032276	regulation of gonadotropin secretion	2	1	0.01	36	0.01355	0.01355	1	1	Any process that modulates the frequency, rate or extent of the regulated release of a gonadotropin	0.66281	0.66281	KISS1, SMAD4
GO:0032278	positive regulation of gonadotropin secr...	2	1	0.01	37	0.01355	0.01355	1	1	Any process that activates or increases the frequency, rate or extent of the regulated release of a gonadotropin	0.66281	0.66281	KISS1, SMAD4
GO:0033684	regulation of luteinizing hormone secret...	2	1	0.01	38	0.01355	0.01355	1	1	Any process that modulates the frequency, rate or extent of the regulated release of luteinizing hormone	0.66281	0.66281	KISS1, SMAD4
GO:0033686	positive regulation of luteinizing hormo...	2	1	0.01	39	0.01355	0.01355	1	1	Any process that activates or increases the frequency, rate or extent of the regulated release of luteinizing hormone	0.66281	0.66281	KISS1, SMAD4
GO:0045218	zonula adherens maintenance	2	1	0.01	40	0.01355	0.01355	1	1	Maintaining the zonula adherens junction, the cell-cell adherens junction formed near the apex of epithelial cells	0.0725268	0.0725268	KIFC3	PLEKHA7
GO:0051012	microtubule sliding	2	1	0.01	41	0.01355	0.01355	1	1	The movement of one microtubule along another microtubule	-0.185208	-0.185208	MAP4	SPAG16
GO:0060264	regulation of respiratory burst involved...	2	1	0.01	1653	0.01355	1	1	1	Any process that modulates the rate, frequency or extent of a phase of elevated metabolic activity, during which oxygen consumption increases made as a defense response ; this leads to the production, by an NADH dependent system, of hydrogen peroxide (H2O2), superoxide anions and hydroxyl radicals	0.607536	0.607536	RPS19, DUSP10
GO:0060266	negative regulation of respiratory burst...	2	1	0.01	42	0.01355	0.01355	1	1	Any process that decreases the rate, frequency or extent of a phase of elevated metabolic activity, during which oxygen consumption increases made as a defense response ; this leads to the production, by an NADH dependent system, of hydrogen peroxide (H2O2), superoxide anions and hydroxyl radicals	0.607536	0.607536	RPS19, DUSP10
GO:0060267	positive regulation of respiratory burst	2	1	0.01	1654	0.01355	1	1	1	Any process that increases the rate frequency or extent of a phase of elevated metabolic activity, during which oxygen consumption increases; this leads to the production, by an NADH dependent system, of hydrogen peroxide (H2O2), superoxide anions and hydroxyl radicals	0.249109	0.249109	RPS19
GO:0060988	lipid tube assembly	2	1	0.01	43	0.01355	0.01355	1	1	The aggregation, arrangement and bonding together of a set of macromolecules to form a macromolecular complex that contains a tube of lipid surrounded by a protein coat involved in membrane shaping of vesicle membranes as the fuse or undergo fission	0.101033	0.101033	BIN1	SNX9
GO:0071460	cellular response to cell-matrix adhesio...	2	1	0.01	44	0.01355	0.01355	1	1	Any process that results in a change in state or activity of a cell (in terms of movement, secretion, enzyme production, gene expression, etc.) as a result of cell-matrix adhesion	0.655537	0.655537	SKP2
GO:0071896	protein localization to adherens junctio...	2	1	0.01	45	0.01355	0.01355	1	1	Any process in which a protein is transported to, and/or maintained at the adherens junction	0.538154	0.538154	SCRIB, MPP7
GO:0051437	positive regulation of ubiquitin-protein...	74	3	0.5	46	0.01375	0.01375	1	1	Any process that activates, maintains or increases the rate of ubiquitin ligase activity that contributes to the mitotic cell cycle	0.644813	-0.942602	PSMA6, ANAPC7, UBC, ANAPC2, ANAPC11, PSMB10, RPS27A, CDK1, PSMA7	PSMD5, PSMD12, PSMA1, ANAPC10, PSMC6, CDC23, PSMA4, PSMD14, CDC27, PSMD6, UBE2E1, PSMD7
GO:1904667	negative regulation of ubiquitin protein...	75	3	0.51	47	0.01426	0.01426	1	1		0.644813	-0.942602	PSMA6, ANAPC7, UBC, ANAPC2, ANAPC11, PSMB10, RPS27A, CDK1, PSMA7	PSMD5, PSMD12, PSMA1, ANAPC10, PSMC6, CDC23, PSMA4, PSMD14, CDC27, PSMD6, UBE2E1, PSMD7
GO:0009141	nucleoside triphosphate metabolic proces...	212	5	1.44	1273	0.01429	0.66451	1	1	The chemical reactions and pathways involving a nucleoside triphosphate, a compound consisting of a nucleobase linked to a deoxyribose or ribose sugar esterified with triphosphate on the sugar	0.709107	-0.984715	NDUFA11, UQCRHL, NDUFA2, DCTPP1, NDUFB2, NME3, FIGNL1, PFKFB4, TSPO, MECP2, UQCC2, PRKAA1, NDUFA9, IMPDH1, ITPA, FLCN, UQCRQ, TGFB1, NDUFB6, UCK1, SAMHD1, COX10, SIRT6, PARG, CDK1, HIF1A, OGDH, TAZ, SURF1	ATP5F1EP2, RHOQ, UQCRB, DNM1L, MSH2, NDUFS1, AP003108.2, ATP5F1C, MOCS2, MBIP, CMPK1, PMPCB, AK3, NDUFA12, RRM2B, TBPL1, BPGM, SLC25A13, NFS1, HSPA8, NDUFB1, CTPS1, GAPDH, SMPDL3A, SDHD, NDUFA6, AK9, NME7, NDUFAF7, TYMS, NMNAT1, DLD
GO:0042775	mitochondrial ATP synthesis coupled elec...	76	3	0.52	1655	0.01477	1	1	1	The transfer of electrons through a series of electron donors and acceptors, generating energy that is ultimately used for synthesis of ATP, as it occurs in the mitochondrial inner membrane or chloroplast thylakoid membrane	0.639147	-0.627974	NDUFA11, UQCRHL, NDUFA2, NDUFB2, MECP2, NDUFA9, UQCRQ, NDUFB6, COX10, CDK1, TAZ	UQCRB, NDUFS1, AP003108.2, PMPCB, NDUFA12, NDUFB1, SDHD, NDUFA6, DLD
GO:0042773	ATP synthesis coupled electron transport	77	3	0.52	1656	0.0153	1	1	1	The transfer of electrons through a series of electron donors and acceptors, generating energy that is ultimately used for synthesis of ATP	0.639147	-0.627974	NDUFA11, UQCRHL, NDUFA2, NDUFB2, MECP2, NDUFA9, UQCRQ, NDUFB6, COX10, CDK1, TAZ	UQCRB, NDUFS1, AP003108.2, PMPCB, NDUFA12, NDUFB1, SDHD, NDUFA6, DLD
GO:1901564	organonitrogen compound metabolic proces...	1465	17	9.96	1367	0.01563	0.73382	1	1	The chemical reactions and pathways involving organonitrogen compound	1.21647	-1.5776	SPNS2, ITGB8, PSMA6, CERS2, EGLN2, FTCD, GPC2, MEX3D, EEF2K, GTF2H3, SLC25A32, NDUFA11, THTPA, RPSA, UQCRHL, MBOAT2, PXYLP1, MTHFR, ARSI, MC1R, PSPH, CYR61, RPL31, MTPN, IGFBP5, DEGS1, EIF2B1, ADSS, SLC22A5, PDE8A, TNRC6B, MRAP, RPS10, NDUFA2, PDXK, DCTPP1, MRPL54, ST3GAL2, RPS21, SLC19A1, TET2, OSBPL5, CSGALNACT2, RPS19, NDUFB2, NME3, UMPS, NAGS, RFK, SECISBP2L, FIGNL1, BPNT1, PFKFB4, TSPO, DAPK…	PSMD5, EXTL2, PPT1, PPCS, ATP5F1EP2, EIF3M, MRPS30, RPL39, GSPT1, MMADHC, LINC02210-CRHR1, CPD, NFE2L2, EIF3E, PSMD12, PAIP1, AZIN1, HPSE, RHOQ, PRKD3, ADNP, CPE, SLC22A4, GSPT2, HSP90AA1, AASDH, RPL15, UQCRB, EIF2AK2, DNM1L, CPA3, MRPL3, HMMR, CSNK2A2, PSMA1, MRPL1, LUM, MSH2, PPP1R15B, ERO1A, EIF2A, NPEPPS, IARS, FAM129A, EEF1E1, IREB2, NPM1, NCK1, PUM2, NAMPT, ARG2, PSMC6, GCH1, EIF1B, ARSK, C…
GO:0072657	protein localization to membrane	389	7	2.64	1489	0.01581	0.84583	1	1	A process in which a protein is transported to, or maintained in, a specific location in a membrane	0.87357	-1.36854	FAM126A, RPSA, TIAM1, LIN7C, TUB, RPL31, RAB26, PRKCE, AP3D1, RPS10, RPS21, RPS19, CRIPT, MYO5A, SCRIB, RPL10, RAB8B, CDK5R1, RPL41, RPS8, RPS29, EFR3A, RPS12, CDH1, CDH2, TGFB1, TOMM7, IFT122, RAMP1, RPL21, RPL35A, MIEF1, PIGW, MPP5, RPL37A, PPP2R5A, PPP3R1, RPLP2, MIEF2, ARHGAP44, ATG4B, RPS27A, EZR, PACS2, DENND4C, RER1, RPL34, RDX, PKDCC, RPS23, CNST, TSPAN15, BCL2L1, KIF13A, PEX5, SSNA1, ARF…	ITGB1, SRP19, RPL39, LYPLA1, PIK3R1, RHOQ, CPE, HSP90AA1, RPL15, YWHAZ, REEP1, TMEM59, PEX3, RAB11A, NUP54, PRNP, GOLPH3L, BLZF1, EPB41L3, YWHAH, CALM2, SDCBP, BBIP1, VAMP3, GOLGA7, EGFR, MFF, RPL36A, MAPK8, SRP72, FGF13, RAB10, SRP54, SH3GLB1, SRP14, HSPA4, RAPGEF2, RPL17-C18orf32, SRP9, ATG4A, RPL9, RPL17, MTCL1, C2CD5, FNTA, RAB8A, PLS1, PKP2, TRAM1, CLASP2, EMP2, PDZD11, ACSL3, TIMM9, SSR1, S…
GO:0009161	ribonucleoside monophosphate metabolic p...	218	5	1.48	698	0.01595	0.31719	1	1	The chemical reactions and pathways involving a ribonucleoside monophosphate, a compound consisting of a nucleobase linked to a ribose sugar esterified with phosphate on the sugar	0.71703	-0.922116	NDUFA11, UQCRHL, ADSS, NDUFA2, NDUFB2, UMPS, RFK, FIGNL1, PFKFB4, TSPO, SCRIB, MECP2, UQCC2, PRKAA1, NDUFA9, IMPDH1, FLCN, UQCRQ, TGFB1, NDUFB6, UCK1, CASK, COX10, SIRT6, PARG, CDK1, HIF1A, OGDH, TAZ, SURF1	ATP5F1EP2, UQCRB, DNM1L, MSH2, NDUFS1, AP003108.2, ATP5F1C, CMPK1, PMPCB, AK3, NDUFA12, HPRT1, NT5E, BPGM, PRPS1, SLC25A13, HSPA8, NDUFB1, UPRT, GAPDH, SDHD, NDUFA6, AK9, PAICS, NDUFAF7, NMNAT1, DLD
GO:1904668	positive regulation of ubiquitin protein...	79	3	0.54	48	0.01638	0.01638	1	1		0.648692	-0.957015	PSMA6, ANAPC7, UBC, ANAPC2, ANAPC11, PSMB10, RPS27A, CDK1, PSMA7, GORASP1	PSMD5, PSMD12, PSMA1, ANAPC10, PSMC6, CDC23, PSMA4, RAB1A, PSMD14, CDC27, PSMD6, UBE2E1, PSMD7
GO:0044248	cellular catabolic process	1354	16	9.2	1441	0.01642	0.80811	1	1	The chemical reactions and pathways resulting in the breakdown of substances, carried out by individual cells	1.11223	-1.52393	ACAD11, PSMA6, SKP2, EXOSC6, RNF6, FTCD, KIF14, VPS13C, SNAP29, PIK3C2B, PPP1R3D, PNPT1, RPSA, ACBD5, ANAPC7, UBC, POP1, ADAM9, RPL31, LAMTOR4, SLC27A4, SOCS4, PDE8A, SUFU, TNRC6B, RPS10, DCTPP1, PTPN3, UBXN2A, RPS21, TBC1D14, TET2, RNF166, RPS19, PYGB, UFL1, TOMM5, TSPO, ANAPC2, DAPK3, CBL, LDLR, POMT2, GGT7, TRIM5, FBXL19, IKBKG, EDC3, HTT, ZHX2, RPL10, UQCC2, TAB3, DNA2, PRKAA1, SPHK1, ANAPC11…	PSMD5, UBE2D3, PPT1, OMA1, RPL39, RNASEH2B, MTREX, GSPT1, UCHL5, NFE2L2, EIF3E, PSMD12, USP25, TENT2, USP38, PAIP1, HPSE, GPD2, DIS3, GSPT2, HSP90AA1, RPL15, BNIP3L, DNM1L, TMTC3, USP14, UBE2N, TMF1, TATDN1, VPS37A, RFFL, SNX14, CSNK2A2, TMEM59, VPS36, DRAM2, PSMA1, USP9Y, ANAPC10, WDR75, LUM, TOMM20, ZMPSTE24, NPEPPS, TRIM13, SMURF2, SUMO1, VTA1, TAF9, PSMC6, ABCD3, FUNDC1, CHMP2B, TOPORS, CRBN,…
GO:0006996	organelle organization	2624	26	17.83	441	0.0174	0.18115	1	1	A process that is carried out at the cellular level which results in the assembly, arrangement of constituent parts, or disassembly of an organelle within a cell. An organelle is an organized structure of distinctive morphology and function. Includes the nucleus, mitochondria, plastids, vacuoles, vesicles, ribosomes and the cytoskeleton. Excludes the plasma membrane	1.31485	-1.89854	MIGA1, TUBB2A, PEX11A, PHC1, KAT6A, IPO4, ATAD2B, MZT1, FTCD, KIF14, VPS13C, SNAP29, CCNK, ARHGAP18, GAS2L3, PIK3C2B, H3F3A, VILL, SYTL3, GTF2H3, SSH2, TPGS1, PRKAR2B, PI4K2B, CDYL, SOD2, C21orf2, PNPT1, ARHGAP35, MAK, NDUFA11, DYM, CDK9, RPSA, HIST1H2AG, TLN2, MTHFR, ANAPC7, UBC, BAHD1, TAF9B, PREX1, SPIRE2, REC8, GFI1, DSCC1, CDC42BPB, DOCK1, BIRC6, CEP126, MTPN, HIRIP3, BIN1, FCHSD2, RPA3, COB…	POT1, NEDD1, ITGB1, GEM, ATP2C1, CETN2, DNAJC28, POLE2, HAT1, UBE2D3, PPT1, OMA1, TERF2IP, MTBP, SUPT3H, EPC1, ACTR6, RNF2, TNPO1, SEC31A, PDCD10, CCNG1, RPF1, RPGR, SMC6, WDR35, YEATS4, TRAPPC6B, BRIX1, CREB1, TAF5, ABCC4, PIK3R1, RHOQ, ARPC5, RABGAP1L, SIN3A, BAZ2A, ITGB3BP, UTP3, KIAA0586, CENPQ, CAMSAP2, PRIM1, PFN2, ZBTB1, ZMYND11, FMN2, SLC25A46, HSP90AA1, ABRAXAS2, UQCRB, BUB1, YWHAZ, PTGE…
GO:0051444	negative regulation of ubiquitin-protein...	81	3	0.55	49	0.01751	0.01751	1	1	Any process that stops, prevents, or reduces the frequency, rate or extent of ubiquitin transferase activity	0.644813	-0.942602	PSMA6, ANAPC7, UBC, ANAPC2, ANAPC11, PSMB10, RPS27A, CDK1, PSMA7	PSMD5, PSMD12, PSMA1, ANAPC10, PSMC6, CDC23, PSMA4, PSMD14, CDC27, PSMD6, UBE2E1, PSMD7
GO:0031398	positive regulation of protein ubiquitin...	147	4	1	50	0.01752	0.01752	1	1	Any process that activates or increases the frequency, rate or extent of the addition of ubiquitin groups to a protein	0.821025	-1.14098	PSMA6, SKP2, CDK9, ANAPC7, UBC, BRCA1, NDFIP2, ANAPC2, SPHK1, ANAPC11, XIAP, CCDC22, PSMB10, BMI1, RPS27A, NDFIP1, CDK1, TICAM1, RASSF5, HSPA5, PSMA7, GORASP1	PSMD5, ARRDC3, PSMD12, UBE2N, DCUN1D5, PSMA1, ANAPC10, PSMC6, TOPORS, CDC23, UBE3A, PSMA4, FBXW7, DCUN1D4, RNF20, RAB1A, DERL1, FKBP1A, PSMD14, CDC27, PSMD6, UBE2E1, RIPK2, PSMD7, PTTG1IP, BIRC2
GO:2000060	positive regulation of protein ubiquitin...	82	3	0.56	51	0.01809	0.01809	1	1	Any process that activates or increases the frequency, rate or extent of protein ubiquitination involved in ubiquitin-dependent protein catabolic process	0.659726	-0.963805	PSMA6, ANAPC7, UBC, ANAPC2, ANAPC11, CCDC22, PSMB10, RPS27A, CDK1, PSMA7	PSMD5, PSMD12, PSMA1, ANAPC10, PSMC6, CDC23, PSMA4, FBXW7, PSMD14, CDC27, PSMD6, UBE2E1, PSMD7
GO:0016071	mRNA metabolic process	596	9	4.05	1157	0.01845	0.57497	1	1	The chemical reactions and pathways involving mRNA, messenger RNA, which is responsible for carrying the coded genetic 'message', transcribed from DNA, to sites of protein assembly at the ribosomes	0.953939	-1.44764	EXOSC6, ZNF326, POLR3K, TRUB1, GTF2H3, CDC40, PPP4R2, PNPT1, CDK9, RPSA, RPL31, PRPF38B, TNRC6B, RPS10, WDR33, CCAR1, RPS21, RPS19, DDX20, RNPC3, SUPT6H, EDC3, ZHX2, RPL10, UBL5, DDX6, SUGP2, RPL41, RPS8, RPS29, ARL6IP4, C5AR1, RPS12, AQR, SNRPB2, LSM5, SREK1IP1, RPL21, PTBP1, RPL35A, SNRPB, THRAP3, RPL37A, HNRNPA1L2, RNH1, CMTR1, RPLP2, DHX8, SREBF1, CACTIN, TSEN54, RPS27A, GEMIN8, RPL34, RPS23,…	SLU7, CMTR2, RPL39, MTREX, GSPT1, RBM39, SLTM, BCAS2, RBMXL1, EIF3E, DHX15, TENT2, PAIP1, RBM17, DYRK1A, DIS3, RBM7, ZBTB1, GSPT2, RPL15, SYF2, PTBP3, TSEN15, MBNL1, PAPOLA, DHX40, GTF2F2, PPWD1, STRAP, RBM25, UPF2, PPIL3, RAVER2, MNAT1, DHX32, GTF2H1, PLRG1, CCNH, RSRC1, TTC37, PCF11, LSM1, HNRNPR, EXOSC3, DDX5, HIPK3, RPL36A, RNF20, ZMAT2, SRPK1, CWC22, ZCCHC8, PPP2R2A, ZC3HAV1, LGALS3, SSB, EI…
GO:0016032	viral process	699	10	4.75	921	0.01846	0.43081	1	1	A multi-organism process in which a virus is a participant. The other participant is the host. Includes infection of a host cell, replication of the viral genome, and assembly of progeny virus particles. In some cases the viral genetic material may integrate into the host genome and only subsequently, under particular circumstances, 'complete' its life cycle	0.934297	-1.37583	CARD9, PKN2, POLR3K, CCNK, CDK9, RPSA, UBC, CREBZF, GFI1, RPL31, IFNGR2, BIN1, CHUK, TAF4, CAMLG, RPS10, RPS21, RPS19, NOTCH1, TAP2, SCRIB, LDLR, TRIM5, SUPT6H, IKBKG, RPL10, TAP1, POLR3G, DDX6, PAK2, RPL41, RPS8, RPS29, NLRP3, KRT7, P4HB, TFAP4, TOP2A, RPS12, RBL1, SIVA1, TMEM250, ISG15, TGFB1, DNAJC3, PSMB10, RPL21, PTBP1, RPL35A, SAMHD1, RPL37A, SEPT6, MAVS, RPLP2, IRF3, RPS27A, PACS2, CHMP7, …	ITGB1, XPR1, RPL39, TNPO1, CREB1, TAF5, PIK3R1, DYRK1A, SIN3A, MON1B, GPAM, ZMYND11, RPL15, BUB1, EIF2AK2, GTF2B, VRK2, STAT1, BNIP3L, LYN, VPS37A, DYNC1LI1, DDX21, SNX3, NUPL2, TRIM13, SUMO1, NPM1, VTA1, NUP35, PUM2, PDGFRA, NUP54, GTF2F2, CHMP2B, WWP1, KPNA3, UBE3A, PSMA4, DHX36, OAS3, AC068234.1, FAM111A, IVNS1ABP, MSH6, LMBRD1, FBXW7, RTRAF, NUP37, GTF2E1, NUP205, TPT1, RAB6A, IFIT5, VAPA, DD…
GO:0046513	ceramide biosynthetic process	31	2	0.21	52	0.01861	0.01861	1	1	The chemical reactions and pathways resulting in the formation of ceramides, any N-acylated sphingoid	0.585449	-0.386427	CERS2, CYR61, DEGS1, PRKAA1, ST3GAL5, ORMDL3, DEGS2	SPTSSA, UGCG, AGK, SAMD8
GO:0050886	endocrine process	31	2	0.21	1657	0.01861	1	1	1	The process that involves the secretion of or response to endocrine hormones. An endocrine hormone is a hormone released into the circulatory system	0.533879	-0.796931	KISS1, RAB11FIP5, SMAD4, KRAS, FAM129B, RAB8B, TBX3	LINC02210-CRHR1, CPA3, TMF1, ATP6AP2, NKX3-1, AGTR1, OXTR, IL1B, CTSZ, MME
GO:0009123	nucleoside monophosphate metabolic proce...	227	5	1.54	757	0.01868	0.33871	1	1	The chemical reactions and pathways involving a nucleoside monophosphate, a compound consisting of a nucleobase linked to a deoxyribose or ribose sugar esterified with phosphate on the sugar	0.71703	-0.922116	NDUFA11, UQCRHL, ADSS, NDUFA2, NDUFB2, UMPS, RFK, FIGNL1, PFKFB4, TSPO, SCRIB, MECP2, UQCC2, PRKAA1, NDUFA9, IMPDH1, FLCN, UQCRQ, TGFB1, NDUFB6, UCK1, CASK, COX10, SIRT6, PARG, CDK1, HIF1A, OGDH, DCK, TAZ, SURF1	ATP5F1EP2, UQCRB, DNM1L, MSH2, NDUFS1, AP003108.2, ATP5F1C, CMPK1, PMPCB, AK3, AK6, NDUFA12, HPRT1, NT5E, BPGM, PRPS1, SLC25A13, HSPA8, NDUFB1, UPRT, GAPDH, SDHD, NDUFA6, AK9, PAICS, NDUFAF7, TYMS, NMNAT1, DLD
GO:0044764	multi-organism cellular process	701	10	4.76	925	0.0188	0.43366	1	1	Any process that is carried out at the cellular level which involves another organism of the same or different species	0.934297	-1.37583	CARD9, PKN2, POLR3K, CCNK, CDK9, RPSA, UBC, CREBZF, GFI1, RPL31, IFNGR2, BIN1, CHUK, SLC22A5, TAF4, CAMLG, RPS10, RPS21, RPS19, NOTCH1, TAP2, SCRIB, LDLR, TRIM5, SUPT6H, IKBKG, RPL10, TAP1, POLR3G, DDX6, PAK2, RPL41, RPS8, RPS29, NLRP3, KRT7, P4HB, TFAP4, TOP2A, RPS12, RBL1, SIVA1, TMEM250, ISG15, TGFB1, DNAJC3, PSMB10, RPL21, PTBP1, RPL35A, SAMHD1, RPL37A, SEPT6, MAVS, RPLP2, IRF3, RPS27A, PACS2…	ITGB1, XPR1, RPL39, TNPO1, CREB1, TAF5, PIK3R1, DYRK1A, SIN3A, MON1B, GPAM, ZMYND11, RPL15, BUB1, EIF2AK2, GTF2B, VRK2, STAT1, BNIP3L, LYN, VPS37A, DYNC1LI1, DDX21, SNX3, NUPL2, TRIM13, SUMO1, NPM1, VTA1, NUP35, PUM2, PDGFRA, NUP54, GTF2F2, CHMP2B, WWP1, KPNA3, UBE3A, PSMA4, DHX36, OAS3, AC068234.1, FAM111A, IVNS1ABP, MSH6, LMBRD1, FBXW7, RTRAF, NUP37, GTF2E1, NUP205, TPT1, RAB6A, IFIT5, VAPA, DD…
GO:1904666	regulation of ubiquitin protein ligase a...	85	3	0.58	53	0.01989	0.01989	1	1		0.648692	-0.957015	PSMA6, ANAPC7, UBC, ANAPC2, ANAPC11, PSMB10, RPS27A, CDK1, PSMA7, GORASP1	PSMD5, PSMD12, PSMA1, ANAPC10, PSMC6, CDC23, PSMA4, RAB1A, PSMD14, CDC27, PSMD6, UBE2E1, PSMD7
GO:0002679	respiratory burst involved in defense re...	3	1	0.02	1658	0.02025	1	1	1	A phase of elevated metabolic activity, during which oxygen consumption increases made as part of a defense response ; this leads to the production, by an NADH dependent system, of hydrogen peroxide (H2O2), superoxide anions and hydroxyl radicals	0.490154	0.490154	RPS19, DUSP10
GO:0021747	cochlear nucleus development	3	1	0.02	54	0.02025	0.02025	1	1	The process whose specific outcome is the progression of the cochlear nucleus over time, from its formation to the mature structure	-0.0557133	-0.0557133	SCRIB	SEC24B
GO:0045716	positive regulation of low-density lipop...	3	1	0.02	55	0.02025	0.02025	1	1	Any process that activates or increases the frequency, rate or extent of the chemical reactions and pathways resulting in the formation of low-density lipoprotein receptors	0.227457	0.227457	CNPY2	HNRNPK
GO:0048742	regulation of skeletal muscle fiber deve...	3	1	0.02	56	0.02025	0.02025	1	1	Any process that modulates the frequency, rate or extent of skeletal muscle fiber development. Muscle fibers are formed by the maturation of myotubes. They can be classed as slow, intermediate/fast or fast	0.17	0.17	FAM129B
GO:0048743	positive regulation of skeletal muscle f...	3	1	0.02	57	0.02025	0.02025	1	1	Any process that activates, maintains or increases the rate of skeletal muscle fiber development. Muscle fibers are formed by the maturation of myotubes. They can be classed as slow, intermediate/fast or fast	0.17	0.17	FAM129B
GO:0060268	negative regulation of respiratory burst	3	1	0.02	58	0.02025	0.02025	1	1	Any process that decreases the rate frequency or extent of a phase of elevated metabolic activity, during which oxygen consumption increases; this leads to the production, by an NADH dependent system, of hydrogen peroxide (H2O2), superoxide anions and hydroxyl radicals	0.531943	0.531943	RPS19, DUSP10
GO:0060591	chondroblast differentiation	3	1	0.02	59	0.02025	0.02025	1	1	The process in which a mesenchymal cell, acquires specialized structural and/or functional features of a chondroblast. Differentiation includes the processes involved in commitment of a cell to a chondroblast fate. A chondroblast is a precursor cell to chondrocytes	0.234109	0.234109	CYR61
GO:0060710	chorio-allantoic fusion	3	1	0.02	60	0.02025	0.02025	1	1	The cell-cell adhesion process in which the cells of the chorion fuse to the cells of the allantois	-0.0440457	-0.0440457	CYR61	ZFP36L1, LEF1
GO:1902856	negative regulation of non-motile cilium...	3	1	0.02	61	0.02025	0.02025	1	1	Any process that stops, prevents or reduces the frequency, rate or extent of nonmotile primary cilium assembly	0.480658	0.480658	MAK, MAP4
GO:1904116	response to vasopressin	3	1	0.02	62	0.02025	0.02025	1	1		0.374055	0.374055	RANGAP1
GO:1904117	cellular response to vasopressin	3	1	0.02	63	0.02025	0.02025	1	1		0.374055	0.374055	RANGAP1
GO:0055114	oxidation-reduction process	606	9	4.12	394	0.02034	0.15752	1	1	A metabolic process that results in the removal or addition of one or more electrons to or from a substance, with or without the concomitant removal or addition of a proton or protons	1.1227	-1.14794	TMX1, ACAD11, EGLN2, PPP1R3D, D2HGDH, SOD2, PNPT1, NDUFA11, UQCRHL, MTHFR, UBC, LOX, DEGS1, OSGIN1, NDUFA2, TET2, CYB561D1, PYGB, NDUFB2, PFKFB4, CYB5B, MECP2, PRKAA1, AKR1C3, PECR, STK40, ASPHD1, ALKBH7, HSD17B1, NUDT19, NDUFA9, P4HB, IMPDH1, GSK3B, UQCRQ, HIGD2A, ACAD8, NDUFB6, LBR, SLC25A10, DHRS13, SCCPDH, DOHH, COX10, MTHFD2, GFOD1, ALDH4A1, ABCD1, STBD1, RPS27A, H6PD, CDK1, RDH5, ALDH3A2, C…	UGP2, HIGD1A, ABCC4, GPD2, UQCRB, NBPF9, KDM5A, TXNL1, FASTKD3, SQLE, ERO1A, ALKBH8, ABCD3, NDUFS1, OXR1, CALM2, AP003108.2, ALDH5A1, JMJD1C, CYP20A1, ACADSB, ACADM, DUS4L, SCP2, PLOD2, IDH3A, HSD17B11, KDM5D, ALDH9A1, PMPCB, ALKBH1, NDUFA12, KDM3A, MICAL2, RRM2B, NBPF20, GDI2, ADIPOR1, GFPT1, PPP1R3E, NNT, GYG1, TMX3, ME2, CRYZL1, RDH11, PEX2, ASPH, ENOX2, PDHB, ETFDH, NOA1, MTO1, SLC25A13, AUH,…
GO:0071156	regulation of cell cycle arrest	86	3	0.58	64	0.02051	0.02051	1	1	Any process that modulates the rate, frequency, or extent of cell cycle arrest, the process in which the cell cycle is halted during one of the normal phases	0.761039	-0.643488	CCNK, PIDD1, CDK9, UBC, BIN1, BRCA1, HMGN5, MDM4, FOXM1, MUC1, CDK5R1, TFAP4, TGFB1, RBL2, CHEK2, RPS27A, CDK1, FOXO4, TNKS1BP1	PCNA, NPM1, CASP2, CNOT2, SETMAR, TRIAP1, CNOT1, ID2, HMGA2, PKD2, CNOT8, CNOT10
GO:0033365	protein localization to organelle	711	10	4.83	1369	0.02055	0.73438	1	1	A process in which a protein is transported to, or maintained in, a location within an organelle	0.830509	-1.6195	IPO4, PBLD, RPSA, TAF3, TUB, RPL31, LAMTOR4, HOOK3, AP3D1, SUFU, RPS10, RPS21, NRAS, TAF8, RPS19, KPNA6, WRAP53, CRIPT, SYT11, TNPO2, DNAJC19, THRA, TOMM5, TSPO, SMAD4, SCRIB, DNLZ, RPL10, KIAA0753, TOMM40L, SPHK1, SZT2, AKR1C3, CROCC, RAB8B, UBL5, RPL41, RPS8, ESCO2, RPS29, NLRP3, PACSIN2, NFKBIE, TSPAN17, RPS12, VTI1A, FLCN, CDH1, LEPROT, GSK3B, TGFB1, TOMM7, CCDC22, IFT122, MAPT, RPL21, KLHL21…	POT1, NEDD1, UBE2D3, TERF2IP, SRP19, MTBP, RPL39, NOV, TNPO1, WDR35, PIK3R1, SIN3A, CENPQ, HSP90AA1, RPL15, YWHAZ, BNIP3L, DNM1L, CSNK2A2, KDELR3, VPS36, PEX3, RTN4, WDR75, TOMM20, NPEPPS, SUMO1, NCOA4, NUP35, RAB11A, NUP54, AP3B1, TOPORS, AP3M1, KPNA3, HSPH1, PEX12, YWHAH, CALM2, HNMT, ZFAND6, PLRG1, BBIP1, PIBF1, DNAJA1, TCP1, FBXW7, CEP68, EGFR, TTK, MFF, SH3BP4, ZFYVE16, RAB6A, VAPA, RPL36A, …
GO:1903364	positive regulation of cellular protein ...	155	4	1.05	65	0.02085	0.02085	1	1	Any process that activates or increases the frequency, rate or extent of cellular protein catabolic process	0.725889	-1.10646	PSMA6, ANAPC7, UBC, SOCS4, RNF166, ANAPC2, UQCC2, ANAPC11, GSK3B, CCDC22, PSMB10, RPS27A, EZR, CDK1, RDX, PSMA7, RNF114, USP5	PSMD5, NFE2L2, PSMD12, TMTC3, PSMA1, ANAPC10, SUMO1, PSMC6, CDC23, PSMA4, BBS7, FBXW7, FBXL5, SUMO2, ARIH1, FMR1, RNF14, PSMD14, CDC27, PSMD6, UBE2E1, TNFAIP3, PSMD7, PTTG1IP, VPS11, SOCS5, RNF19A
GO:0007219	Notch signaling pathway	87	3	0.59	66	0.02114	0.02114	1	1	A series of molecular signals initiated by the binding of an extracellular ligand to the receptor Notch on the surface of a target cell, and ending with regulation of a downstream cellular process, e.g. transcription	0.710369	-0.815722	POFUT1, UBC, TBX2, NEURL1B, RPS19, DTX4, NOTCH1, MAML2, FAM129B, GATA2, GDPD5, TGFB1, DNER, HHEX, RPS27A, POGLUT1, CHAC1, GSX2	NOV, PDCD10, IFT74, FBXW7, NEPRO, SYNJ2BP, NOTCH2, ADAM10, KAT2B, RBPJ, NCSTN, SPEN, ZMIZ1
GO:0044403	symbiosis, encompassing mutualism throug...	717	10	4.87	966	0.02166	0.45631	1	1	An interaction between two organisms living together in more or less intimate association. The term host is usually used for the larger (macro) of the two members of a symbiosis. The smaller (micro) member is called the symbiont organism. Microscopic symbionts are often referred to as endosymbionts. The various forms of symbiosis include parasitism, in which the association is disadvantageous or …	0.934297	-1.37583	CARD9, PKN2, POLR3K, CCNK, CDK9, RPSA, UBC, CREBZF, GFI1, RPL31, IFNGR2, BIN1, CHUK, SLC22A5, TAF4, CAMLG, RPS10, RPS21, RPS19, NOTCH1, TAP2, CBL, SCRIB, LDLR, TRIM5, SUPT6H, IKBKG, RPL10, TAP1, POLR3G, DDX6, PAK2, RPL41, RPS8, RPS29, NLRP3, KRT7, P4HB, TFAP4, TOP2A, RPS12, RBL1, SIVA1, CDH1, TMEM250, ISG15, TGFB1, DNAJC3, PSMB10, RPL21, PTBP1, RPL35A, SAMHD1, RPL37A, SEPT6, MAVS, RPLP2, IRF3, RP…	ITGB1, XPR1, RPL39, TNPO1, CREB1, TAF5, PIK3R1, DYRK1A, SIN3A, MON1B, GPAM, ZMYND11, RPL15, BUB1, EIF2AK2, GTF2B, VRK2, STAT1, BNIP3L, LYN, VPS37A, DYNC1LI1, DDX21, SNX3, NUPL2, TRIM13, SUMO1, NPM1, VTA1, NUP35, PUM2, PDGFRA, NUP54, GTF2F2, CHMP2B, WWP1, KPNA3, UBE3A, PSMA4, DHX36, OAS3, AC068234.1, FAM111A, IVNS1ABP, TCP1, MSH6, LMBRD1, FBXW7, RTRAF, NUP37, GTF2E1, NUP205, TPT1, RAB6A, IFIT5, VA…
GO:0007030	Golgi organization	88	3	0.6	67	0.02178	0.02178	1	1	A process that is carried out at the cellular level which results in the assembly, arrangement of constituent parts, or disassembly of the Golgi apparatus	0.694286	-0.899011	PI4K2B, DYM, STX16, UBXN2A, KIFC3, PI4K2A, HTT, STX18, STX6, ATP8B2, VTI1A, TMED9, RAB2A, CDK1, MAP2K1, GORASP1, COG2	DNAJC28, PDCD10, YWHAZ, GOLPH3L, BLZF1, GOLGA5, RAB1A, HACE1, NSFL1C, FBXW8, ZW10, UBXN2B, CLASP2, ARL1
GO:0044419	interspecies interaction between organis...	719	10	4.89	969	0.02204	0.45912	1	1	Any process in which an organism has an effect on an organism of a different species	0.934297	-1.37583	CARD9, PKN2, POLR3K, CCNK, CDK9, RPSA, UBC, CREBZF, GFI1, RPL31, IFNGR2, BIN1, CHUK, SLC22A5, TAF4, CAMLG, RPS10, RPS21, RPS19, NOTCH1, TAP2, CBL, SCRIB, LDLR, MECP2, TRIM5, SUPT6H, IKBKG, RPL10, TAP1, POLR3G, DDX6, PAK2, RPL41, RPS8, RPS29, NLRP3, KRT7, P4HB, TFAP4, TOP2A, RPS12, RBL1, SIVA1, CDH1, TMEM250, ISG15, TGFB1, DNAJC3, PSMB10, RPL21, PTBP1, RPL35A, SAMHD1, RPL37A, SEPT6, MAVS, RPLP2, I…	ITGB1, XPR1, RPL39, TNPO1, CREB1, TAF5, PIK3R1, DYRK1A, SIN3A, MON1B, GPAM, ZMYND11, RPL15, BUB1, EIF2AK2, GTF2B, VRK2, STAT1, BNIP3L, LYN, VPS37A, DYNC1LI1, DDX21, SNX3, NUPL2, TRIM13, SUMO1, NPM1, VTA1, NUP35, PUM2, PDGFRA, NUP54, GTF2F2, CHMP2B, WWP1, KPNA3, UBE3A, PSMA4, DHX36, OAS3, AC068234.1, FAM111A, IVNS1ABP, TCP1, MSH6, LMBRD1, FBXW7, RTRAF, NUP37, GTF2E1, NUP205, TPT1, RAB6A, IFIT5, VA…
GO:0006296	nucleotide-excision repair, DNA incision...	34	2	0.23	68	0.02217	0.02217	1	1	The endonucleolytic cleavage of the damaged strand of DNA 5' to the site of damage. The incision occurs at the junction of single-stranded DNA and double-stranded DNA that is formed when the DNA duplex is unwound. The incision follows the incision formed 3' to the site of damage	0.537851	-0.428553	GTF2H3, UBC, RPA3, NTHL1, RPS27A, RFC1	PCNA, GTF2H1, RFC4, POLD3
GO:0042769	DNA damage response, detection of DNA da...	34	2	0.23	69	0.02217	0.02217	1	1	The series of events required to receive a stimulus indicating DNA damage has occurred and convert it to a molecular signal	0.459995	-0.590529	UBC, RPA3, RPS27A, RFC1, MRPS26	PCNA, RFC4, DNAJA1, MRPS9, DTL, POLD3, HMGA2, RAD18
GO:0022904	respiratory electron transport chain	89	3	0.6	1659	0.02243	1	1	1	A process in which a series of electron carriers operate together to transfer electrons from donors such as NADH and FADH2 to any of several different terminal electron acceptors to generate a transmembrane electrochemical gradient	0.686711	-0.692539	D2HGDH, NDUFA11, UQCRHL, NDUFA2, NDUFB2, MECP2, NDUFA9, UQCRQ, NDUFB6, COX10, CDK1, TAZ, IMMP2L	UQCRB, NDUFS1, AP003108.2, ALDH5A1, PMPCB, NDUFA12, ETFDH, SLC25A13, NDUFB1, SDHD, NDUFA6, DLD
GO:0022900	electron transport chain	90	3	0.61	1660	0.0231	1	1	1	A process in which a series of electron carriers operate together to transfer electrons from donors to any of several different terminal electron acceptors to generate a transmembrane electrochemical gradient	0.686711	-0.692539	D2HGDH, NDUFA11, UQCRHL, NDUFA2, NDUFB2, MECP2, NDUFA9, UQCRQ, NDUFB6, COX10, CDK1, TAZ, IMMP2L	UQCRB, NDUFS1, AP003108.2, ALDH5A1, PMPCB, NDUFA12, ETFDH, SLC25A13, NDUFB1, SDHD, NDUFA6, DLD
GO:0045739	positive regulation of DNA repair	35	2	0.24	70	0.02341	0.02341	1	1	Any process that activates or increases the frequency, rate or extent of DNA repair	0.428755	-0.687553	BRCA1, BABAM1, FOXM1, FAM168A, APBB1	PCNA, UBE2N, ABRAXAS1, EGFR, EYA4, SETMAR, SLF1, BRCC3, BABAM2
GO:1903322	positive regulation of protein modificat...	161	4	1.09	71	0.02359	0.02359	1	1	Any process that activates or increases the frequency, rate or extent of protein modification by small protein conjugation or removal	0.821025	-1.14098	PSMA6, SKP2, CDK9, ANAPC7, UBC, BRCA1, NDFIP2, ANAPC2, SPHK1, ANAPC11, XIAP, CCDC22, PSMB10, BMI1, RPS27A, TOLLIP, NDFIP1, CDK1, TICAM1, RASSF5, HSPA5, PSMA7, GORASP1	PSMD5, ARRDC3, PSMD12, UBE2N, DCUN1D5, PSMA1, ANAPC10, PSMC6, TOPORS, CDC23, UBE3A, PSMA4, FBXW7, DCUN1D4, RNF20, RAB1A, DERL1, FKBP1A, PSMD14, CDC27, PSMD6, UBE2E1, RIPK2, PSMD7, PTTG1IP, BIRC2
GO:0007005	mitochondrion organization	423	7	2.87	512	0.02387	0.21786	1	1	A process that is carried out at the cellular level which results in the assembly, arrangement of constituent parts, or disassembly of a mitochondrion; includes mitochondrial morphogenesis and distribution, and replication of the mitochondrial genome as well as synthesis of new mitochondrial components	0.921508	-1.22187	MIGA1, VPS13C, SOD2, PNPT1, NDUFA11, CLUH, NDUFA2, PET100, NDUFB2, SLC35F6, DNAJC19, MTFP1, TOMM5, TSPO, DNLZ, HTT, UQCC2, DNA2, TOMM40L, UBL5, ALKBH7, NDUFA9, COX14, CTTN, FLCN, LEPROT, GSK3B, TOMM7, NDUFB6, MAPT, MIEF1, LMNA, BAP1, PPP3R1, COX10, MIEF2, SREBF1, ATG4B, GABPA, IFIT2, HIF1A, BCL2L1, OPA1, TWNK, ATP2A1, JUN, YME1L1, GCLM, TIMM44, UBE2J2, BAK1, TAZ, SURF1, POLR3A, IMMP2L, NDUFAF4	UBE2D3, OMA1, WDR35, SLC25A46, HSP90AA1, UQCRB, YWHAZ, BNIP3L, DNM1L, AGTPBP1, CSNK2A2, WDR75, TOMM20, NPEPPS, SLC25A36, FUNDC1, MAN2A1, ATPAF1, NDUFS1, YWHAH, CALM2, HNMT, CHCHD3, AP003108.2, FBXW7, MFF, ATG5, MAPK8, TRMT61B, NDUFA12, NDUFAF6, SH3GLB1, GGCT, SYNJ2BP, HSPA4, RRM2B, MAP1LC3B, MPV17, PRIMPOL, TRIAP1, NUBPL, ATG4A, SUPV3L1, SDHAF3, UGCG, MTO1, GGNBP1, NDUFB1, KIAA0391, BECN1, TIMM23…
GO:0071897	DNA biosynthetic process	162	4	1.1	557	0.02407	0.23541	1	1	The cellular DNA metabolic process resulting in the formation of DNA, deoxyribonucleic acid, one of the two main types of nucleic acid, consisting of a long unbranched macromolecule formed from one or two strands of linked deoxyribonucleotides, the 3'-phosphate group of each constituent deoxyribonucleotide being joined in 3',5'-phosphodiester linkage to the 5'-hydroxyl group of the deoxyribose mo…	0.712802	-1.22961	LIN9, UBC, DSCC1, RPA3, BRCA1, WRAP53, DNA2, FAM129B, RMI1, ISG15, RPS27A, USP43, PDGFRB, RFC1, NHP2, BRCA2, TNKS1BP1, NEK2	POT1, POLE2, TERF2IP, ZBTB1, HSP90AA1, PTGES3, PCNA, RFC4, TCP1, DNAJC2, RBBP8, GREM1, DTL, PRIMPOL, HNRNPC, EXO1, GJA1, POLD3, PPIA, HNRNPD, POLM, CCT5, RMI2, TEP1, TYMS, GNL3L, RAD51C
GO:0033683	nucleotide-excision repair, DNA incision	36	2	0.24	72	0.02468	0.02468	1	1	A process that results in the endonucleolytic cleavage of the damaged strand of DNA. The incision occurs at the junction of single-stranded DNA and double-stranded DNA that is formed when the DNA duplex is unwound	0.537851	-0.475386	GTF2H3, UBC, RPA3, NTHL1, RPS27A, RFC1	PCNA, GTF2H1, RFC4, POLD3, OGG1
GO:0034613	cellular protein localization	1305	15	8.87	968	0.02564	0.45906	1	1	Any process in which a protein is transported to, and/or maintained in, a specific location at the level of a cell. Localization at the cellular level encompasses movement within the cell, from within the cell to the cell surface, or from one location to another at the surface of a cell	1.01626	-1.75359	FAM126A, IPO4, MZT1, TAX1BP3, SYTL3, CDC40, MAK, PBLD, TOM1, RPSA, TIAM1, TLN2, TAF3, LIN7C, TUB, RPL31, RAB26, LAMTOR4, PRKCE, IFI27, HOOK3, AP3D1, SUFU, CCNE2, MRAP, RPS10, WDR33, STX16, ZNF593, SNX8, RPS21, TBC1D14, NRAS, TAF8, RPS19, KPNA6, WRAP53, CRIPT, SYT11, GGA2, SAR1B, MYO5A, ARFIP1, TNPO2, DNAJC19, THRA, TOMM5, TSPO, TAP2, RAB11FIP5, SMAD4, SCRIB, DNLZ, SUPT6H, STX18, RPL10, KIAA0753, …	POT1, NEDD1, ITGB1, UBE2D3, SLU7, TERF2IP, SRP19, MTBP, DVL3, RPL39, LYPLA1, NOV, TNPO1, RPGR, SNX13, WDR35, PIK3R1, RHOQ, RABGAP1L, SIN3A, CENPQ, CPE, HSP90AA1, RPL15, YWHAZ, REEP1, BNIP3L, DNM1L, IFT74, SNX2, CSNK2A2, KDELR3, TMEM59, VPS36, PEX3, RTN4, WDR75, TOMM20, NPEPPS, NUPL2, SUMO1, NPM1, NCOA4, NUP35, RAB11A, NUP54, PRNP, AP3B1, LEPROTL1, TOPORS, AP3M1, XPOT, KPNA3, HSPH1, GOLPH3L, BLZF1…
GO:0051443	positive regulation of ubiquitin-protein...	94	3	0.64	74	0.02586	0.02586	1	1	Any process that activates, maintains or increases the rate of ubiquitin transferase activity	0.655351	-1.14098	PSMA6, ANAPC7, UBC, ANAPC2, ANAPC11, PSMB10, BMI1, RPS27A, CDK1, PSMA7, GORASP1	PSMD5, ARRDC3, PSMD12, UBE2N, DCUN1D5, PSMA1, ANAPC10, PSMC6, TOPORS, CDC23, PSMA4, FBXW7, DCUN1D4, RAB1A, PSMD14, CDC27, PSMD6, UBE2E1, PSMD7
GO:2000058	regulation of protein ubiquitination inv...	94	3	0.64	75	0.02586	0.02586	1	1	Any process that modulates the frequency, rate or extent of protein ubiquitination involved in ubiquitin-dependent protein catabolic process	0.689421	-0.991682	PSMA6, ANAPC7, UBC, SUFU, ANAPC2, ANAPC11, CCDC22, PSMB10, RPS27A, CDK1, PSMA7	PSMD5, PSMD12, PSMA1, ANAPC10, PSMC6, CDC23, UBE3A, PSMA4, FBXW7, PSMD14, CDC27, PSMD6, UBE2E1, PSMD7
GO:0019985	translesion synthesis	37	2	0.25	1661	0.02598	1	1	1	The replication of damaged DNA by synthesis across a lesion in the template strand; a specialized DNA polymerase or replication complex inserts a defined nucleotide across from the lesion which allows DNA synthesis to continue beyond the lesion. This process can be mutagenic depending on the damaged nucleotide and the inserted nucleotide	0.488302	-0.721675	UBC, RPA3, ISG15, RPS27A, USP43, RFC1	POLE2, ZBTB1, PCNA, RFC4, DTL, PRIMPOL, POLD3
GO:0032202	telomere assembly	4	1	0.03	1662	0.02691	1	1	1	A cellular process that results in the aggregation, arrangement and bonding together of a set of components to form a telomere at a non-telomeric double-stranded DNA end. A telomere is a terminal region of a linear chromosome that includes telomeric DNA repeats and associated proteins	-0.401784	-0.401784	WRAP53	POT1
GO:0032275	luteinizing hormone secretion	4	1	0.03	76	0.02691	0.02691	1	1	The regulated release of luteinizing hormone, a gonadotropic glycoprotein hormone secreted by the anterior pituitary	0.178927	0.178927	KISS1, SMAD4, TBX3	TMF1
GO:0042262	DNA protection	4	1	0.03	77	0.02691	0.02691	1	1	Any process in which DNA is protected from damage by, for example, oxidative stress	0.0840491	0.0840491	DCTPP1
GO:0043615	astrocyte cell migration	4	1	0.03	78	0.02691	0.02691	1	1	The orderly movement of an astrocyte, a class of large neuroglial (macroglial) cells in the central nervous system, the largest and most numerous neuroglial cells in the brain and spinal cord	-0.0207591	-0.0207591	SCRIB
GO:0045217	cell-cell junction maintenance	4	1	0.03	79	0.02691	0.02691	1	1	The maintenance of junctions between cells	0.0597658	0.0597658	KIFC3	PLEKHA7
GO:0060088	auditory receptor cell stereocilium orga...	4	1	0.03	80	0.02691	0.02691	1	1	A process that is carried out at the cellular level which results in the assembly, arrangement of constituent parts, or disassembly of a stereocilium. A stereocilium is an actin-based protrusion from the apical surface of auditory hair cells	-0.0962867	-0.0962867	SCRIB	SEC24B
GO:0060124	positive regulation of growth hormone se...	4	1	0.03	81	0.02691	0.02691	1	1	Any process that increases the frequency, rate or extent of the regulated release of growth hormone from a cell	0.382323	0.382323	KISS1, SERP1
GO:0090666	scaRNA localization to Cajal body	4	1	0.03	82	0.02691	0.02691	1	1		-0.102168	-0.102168	WRAP53	TCP1
GO:0098887	neurotransmitter receptor transport, end...	4	1	0.03	83	0.02691	0.02691	1	1		0.08442	0.08442	SCRIB, ARHGAP44	RAB11A
GO:1901566	organonitrogen compound biosynthetic pro...	967	12	6.57	1104	0.02752	0.54017	1	1	The chemical reactions and pathways resulting in the formation of organonitrogen compound	0.919212	-1.50142	CERS2, GPC2, MEX3D, EEF2K, GTF2H3, RPSA, PXYLP1, MC1R, PSPH, CYR61, RPL31, MTPN, IGFBP5, DEGS1, EIF2B1, ADSS, TNRC6B, MRAP, RPS10, PDXK, MRPL54, ST3GAL2, RPS21, CSGALNACT2, RPS19, NME3, UMPS, NAGS, RFK, SECISBP2L, TSPO, DAPK3, PDCL, GGT7, LARP4, RPL10, UQCC2, PRKAA1, SPHK1, DDX6, GIGYF2, RPL41, RPS8, CSNK1G2, MRPS21, RPS29, ST3GAL5, IMPDH1, RPS12, FLCN, CSPG4, TGFB1, DNAJC3, RAMP1, RPL21, PTBP1, …	EXTL2, PPCS, ATP5F1EP2, EIF3M, MRPS30, RPL39, GSPT1, LINC02210-CRHR1, NFE2L2, EIF3E, PAIP1, AZIN1, PRKD3, ADNP, GSPT2, AASDH, RPL15, EIF2AK2, MRPL3, CSNK2A2, MRPL1, LUM, PPP1R15B, EIF2A, IARS, FAM129A, EEF1E1, IREB2, NPM1, NCK1, PUM2, NAMPT, ARG2, GCH1, EIF1B, C12orf65, EIF3J, HS2ST1, PANK1, RARS, SLC35B3, ESD, CALM2, DARS2, CAPRIN1, EIF3H, WARS2, EGFR, MTIF3, ATP5F1C, HNRNPR, RMND1, MOCS2, LCMT2…
GO:0022602	ovulation cycle process	39	2	0.27	532	0.02866	0.22541	1	1	A process involved in the sexual cycle seen in females, often with physiologic changes in the endometrium that recur at regular intervals during the reproductive years	0.656596	-0.436754	ADAMTS1, TAF4, KISS1, KITLG, SMAD4, FOXO3, STAT5B, BCL2L1, IMMP2L	PDGFRA, UBE3A, CASP2, TGFB2, EIF2B2
GO:0036297	interstrand cross-link repair	40	2	0.27	84	0.03003	0.03003	1	1	Removal of a DNA interstrand crosslink (a covalent attachment of DNA bases on opposite strands of the DNA) and restoration of the DNA. DNA interstrand crosslinks occur when both strands of duplex DNA are covalently tethered together (e.g. by an exogenous or endogenous agent), thus preventing the strand unwinding necessary for essential DNA functions such as transcription and replication	0.530515	-0.423063	UBC, RPA3, DCLRE1B, FAAP24, RPS27A, ATRIP, FANCC	DCLRE1C, FANCB, FANCL, SLX4
GO:0046034	ATP metabolic process	175	4	1.19	1173	0.03081	0.5822	1	1	The chemical reactions and pathways involving ATP, adenosine triphosphate, a universally important coenzyme and enzyme regulator	0.693812	-0.909016	NDUFA11, UQCRHL, NDUFA2, NDUFB2, FIGNL1, PFKFB4, TSPO, MECP2, UQCC2, PRKAA1, NDUFA9, FLCN, UQCRQ, TGFB1, NDUFB6, COX10, SIRT6, PARG, CDK1, HIF1A, OGDH, TAZ, SURF1	ATP5F1EP2, UQCRB, DNM1L, MSH2, NDUFS1, AP003108.2, ATP5F1C, PMPCB, NDUFA12, BPGM, SLC25A13, HSPA8, NDUFB1, GAPDH, SDHD, NDUFA6, AK9, NDUFAF7, NMNAT1, DLD
GO:0034470	ncRNA processing	351	6	2.39	453	0.03124	0.1884	1	1	Any process that results in the conversion of one or more primary non-coding RNA (ncRNA) transcripts into one or more mature ncRNA molecules	0.938097	-1.24774	NSUN5P2, EXOSC6, OSGEP, TRUB1, C1D, RPSA, POP1, RPL31, RPS10, RPS21, NSUN5P1, RPS19, LAGE3, DHX37, RPL10, RPL41, RPS8, RPS29, CTU1, RPS12, NPM3, NSUN5, RPL21, RPL35A, RRNAD1, RPL37A, FCF1, INTS2, RPLP2, TSEN54, RPS27A, UTP11, GTPBP3, RPL34, TRMT10A, RPS23, NHP2, TARBP2, BOP1, NSUN6, DDX49, EXOSC7, RPS28	RPL39, MTREX, RPF1, INTS8, MPHOSPH10, DIS3, UTP3, INTS6, RPL15, INTS7, TSEN15, WDR75, MRPL1, DDX21, ALKBH8, NOP58, PUS7L, SBDS, HEATR1, RRP15, RTRAF, EXOSC3, LCMT2, THUMPD1, MRPS9, RPL36A, DUS4L, TRMT61B, PRKRA, TRMT11, ALKBH1, SSB, BMT2, MAK16, INTS12, UTP4, NOL11, UTP15, OSGEPL1, FRG1, RPL17-C18orf32, RPL9, MTFMT, SMAD2, RPL17, IMP4, MTO1, PUS7, LTV1, EXOSC9, KIAA0391, PUS3, METTL2B, PNO1, MPHO…
GO:0001542	ovulation from ovarian follicle	5	1	0.03	85	0.03353	0.03353	1	1	The process leading to the rupture of the follicle, releasing the centrally located oocyte into the oviduct. An example of this is found in Mus musculus	0.305268	0.305268	ADAMTS1, FOXO3
GO:0002093	auditory receptor cell morphogenesis	5	1	0.03	86	0.03353	0.03353	1	1	Any process that alters the size or shape of an auditory receptor cell	-0.0413623	-0.0413623	SCRIB	SEC24B
GO:0007000	nucleolus organization	5	1	0.03	87	0.03353	0.03353	1	1	A process that is carried out at the cellular level which results in the assembly, arrangement of constituent parts, or disassembly of the nucleolus	0.13782	0.13782	RPS19
GO:0009211	pyrimidine deoxyribonucleoside triphosph...	5	1	0.03	1663	0.03353	1	1	1	The chemical reactions and pathways involving pyrimidine deoxyribonucleoside triphosphate, a compound consisting of a pyrimidine base linked to a deoxyribose sugar esterified with triphosphate on the sugar	0.0130365	0.0130365	DCTPP1	TBPL1, TYMS
GO:0021548	pons development	5	1	0.03	88	0.03353	0.03353	1	1	The process whose specific outcome is the progression of the pons over time, from its formation to the mature structure. The pons lies above the medulla and next to the cerebellum. The pons conveys information about movement from the cerebral hemisphere to the cerebellum	0.194443	0.194443	SCRIB, CDK5R1, UQCRQ	SEC24B
GO:0033690	positive regulation of osteoblast prolif...	5	1	0.03	89	0.03353	0.03353	1	1	Any process that activates or increases the rate or extent of osteoblast proliferation	0.0244667	0.0244667	CYR61	HPSE
GO:0051029	rRNA transport	5	1	0.03	90	0.03353	0.03353	1	1	The directed movement of rRNA, ribosomal ribonucleic acid, into, out of or within a cell, or between cells, by means of some agent such as a transporter or pore	0.371713	0.371713	PNPT1, RPSA, TST
GO:0060123	regulation of growth hormone secretion	5	1	0.03	91	0.03353	0.03353	1	1	Any process that modulates the frequency, rate or extent of the regulated release of growth hormone from a cell	0.304698	0.304698	KISS1, SERP1
GO:0097120	receptor localization to synapse	5	1	0.03	92	0.03353	0.03353	1	1	Any process in which a receptor is transported to, and/or maintained at the synapse, the junction between a nerve fiber of one neuron and another neuron or muscle fiber or glial cell	-0.100678	-0.100678	SCRIB	CEP112, NPTN
GO:0099638	endosome to plasma membrane protein tran...	5	1	0.03	93	0.03353	0.03353	1	1		-0.00858041	-0.00858041	SCRIB, ARHGAP44	RAB11A
GO:0099639	neurotransmitter receptor transport, end...	5	1	0.03	94	0.03353	0.03353	1	1		-0.00858041	-0.00858041	SCRIB, ARHGAP44	RAB11A
GO:1902946	protein localization to early endosome	5	1	0.03	1664	0.03353	1	1	1	A process in which a protein is transported to, or maintained in, a location within an early endosome	0.199163	0.199163	SCRIB, EZR, RDX
GO:0051726	regulation of cell cycle	776	10	5.27	95	0.03505	0.03505	1	1	Any process that modulates the rate or extent of progression through the cell cycle	1.02819	-1.47259	PSMA6, SKP2, PKN2, SKIL, KIF14, CCNK, LIN9, TMEM8B, PNPT1, PIDD1, CDK9, CDK19, ANAPC7, UBC, BIRC6, LAMTOR4, BIN1, RPA3, PRKCE, DCLRE1B, BRCA1, CCNE2, PPP1R1C, MADD, PTPN3, HMGN5, BABAM1, FIGNL1, ENTR1, ANAPC2, ZNF703, DAPK3, MDM4, SCRIB, MECP2, CDK20, CDK8, GEN1, DNA2, PRKAA1, SPHK1, FOXM1, ANAPC11, MUC1, CDK5R1, GIGYF2, ATAD5, LIN54, RASSF1, TFAP4, GDPD5, TOP2A, RBL1, FBXO31, FLCN, TGFB1, PSMB10…	ITGB1, CETN2, PSMD5, MTBP, RNASEH2B, PSMD12, CCNG1, SIN3A, BUB1, PRKACB, INTS7, PCNA, SYF2, E2F5, NUSAP1, CSNK2A2, DYNC1LI1, PSMA1, ANAPC10, ZNF655, DDIAS, MSH2, UBA3, NPM1, TOPBP1, PSMC6, RAB11A, PRNP, CHMP2B, CDC23, TRIM36, PSMA4, MNAT1, CALM2, PRKAB2, SDCBP, ABRAXAS1, GTF2H1, SPIN2B, PLRG1, NKX3-1, CCNH, PSMG2, MAP3K20, FBXW7, EGFR, DLGAP5, TTK, LATS2, PHIP, MDM1, DYNLT3, SENP6, HECW2, USP47, …
GO:0010605	negative regulation of macromolecule met...	1605	17	10.91	687	0.0355	0.31159	1	1	Any process that decreases the frequency, rate or extent of the chemical reactions and pathways involving macromolecules, any molecule of high relative molecular mass, the structure of which essentially comprises the multiple repetition of units derived, actually or conceptually, from molecules of low relative molecular mass	1.17043	-1.71432	LRP8, ITGB8, PSMA6, KAT6A, KLF12, EXOSC6, SKIL, CNPY2, ATAD2B, SOCS7, MEX3D, H3F3A, SH3RF1, NPAT, KLF16, TOB2, C1D, FZD8, PRKAR2B, CDYL, HES6, PNPT1, ARHGAP35, PBLD, CDK9, RPSA, HIST1H2AG, TSNAX, PRKAR1B, ZBTB18, ANAPC7, TAF3, UBC, BAHD1, TAF9B, CREBZF, PREX1, TBX2, GFI1, RPL31, WFDC3, BIRC6, GON4L, IGFBP5, RASSF2, PRKCE, IFI27, STRN3, SOCS4, PPM1F, HMG20A, SUFU, BRCA1, TNRC6B, RPS10, PPP1R1C, CC…	POT1, FAM220A, PSMD5, ZNF675, HAT1, UBE2D3, THRB, TERF2IP, RPL39, RNASEH2B, GSPT1, EPC1, RNF2, UCHL5, EIF3E, PSMD12, USP25, TENT2, PDCD10, WDR35, PAIP1, CREB1, AZIN1, DYRK1A, SIN3A, DIS3, ADNP, BAZ2A, ITM2B, ZBTB1, ZMYND11, GSPT2, FMN2, RPL15, NFIL3, EIF2AK2, STAT1, ZNF224, USP14, IRF2, KDM5A, PTBP3, TMF1, LYN, AKIRIN2, GLIS3, ZNF567, EED, RFFL, BTAF1, TMEM59, CAMK2N1, PSMA1, ZBTB33, ANAPC10, COP…
GO:0071840	cellular component organization or bioge...	4047	35	27.5	510	0.03572	0.21446	1	1	A process that results in the biosynthesis of constituent macromolecules, assembly, arrangement of constituent parts, or disassembly of a cellular component	1.52357	-1.91259	MIGA1, TUBB2A, PEX11A, FAM126A, NSUN5P2, LRP8, ITGB8, TRAPPC13, PHC1, KAT6A, IPO4, CERS2, EGLN2, PKN2, NUFIP1, EXOSC6, SKIL, RNF6, PSPN, ATAD2B, MZT1, FTCD, KIF14, VPS13C, TIE1, SNAP29, CCNK, EEF2K, ARHGAP18, GAS2L3, THSD4, PIK3C2B, H3F3A, VILL, SYTL3, GTF2H3, SSH2, C1D, TPGS1, PRKAR2B, PI4K2B, CDYL, SOD2, CLGN, C21orf2, PNPT1, ARHGAP35, MAK, NDUFA11, DYM, CDK9, DNAJC6, RPSA, HIST1H2AG, TIAM1, TL…	POT1, NEDD1, ITGB1, GEM, ATP2C1, CETN2, PSMD5, DNAJC28, POLE2, HAT1, UBE2D3, PPT1, SLU7, OMA1, TERF2IP, SRP19, MTBP, DVL3, MRPS30, RPL39, LYPLA1, MTREX, GSPT1, SUPT3H, EPC1, ACTR6, NOV, RNF2, NFE2L2, COL11A1, TNPO1, SEC31A, KIAA1109, PDCD10, CCNG1, RPF1, TLL1, RPGR, SMC6, WDR35, SLC9A6, YEATS4, TRAPPC6B, BRIX1, CREB1, TANC1, TAF5, ABCC4, PIK3R1, RHOQ, ARPC5, RABGAP1L, MPHOSPH10, SIN3A, DIS3, ADNP…
GO:0023061	signal release	185	4	1.26	743	0.03669	0.33238	1	1	The process in which a signal is secreted or discharged into the extracellular medium from a cellular source	0.777398	-1.15751	SNAP29, SYTL3, TIAM1, LIN7C, PRKCE, PPFIA3, KISS1, SYT11, MYO5A, SNX19, RAB11FIP5, SMAD4, SCRIB, STXBP3, MIDN, UQCC2, FAM129B, RAB8B, SNAP23, CASK, SREBF1, SERP1, CAPN10, HMGCR, C2CD2L, HIF1A, STX2, PDE8B, TBX3, NMB, LIN7B, IRS1, PTPRN2, PNKD, RAB3GAP1	PPT1, LINC02210-CRHR1, NOV, CREB1, PFN2, DNM1L, TMF1, LYN, CALM2, NKX3-1, EGFR, SNX4, RAP1B, AGTR1, ISL1, RAB1A, FMR1, ILDR2, STX11, SMAD2, IL1B, GJA1, HSPA8, NF1, PDZD11
GO:0051438	regulation of ubiquitin-protein transfer...	109	3	0.74	96	0.03772	0.03772	1	1	Any process that modulates the frequency, rate or extent of ubiquitin transferase activity	0.655351	-1.14098	PSMA6, ANAPC7, UBC, ANAPC2, ANAPC11, PSMB10, BMI1, RPS27A, CDK1, PSMA7, GORASP1	PSMD5, ARRDC3, PSMD12, UBE2N, DCUN1D5, PSMA1, ANAPC10, PSMC6, TOPORS, CDC23, PSMA4, FBXW7, DCUN1D4, RAB1A, PSMD14, CDC27, PSMD6, UBE2E1, PSMD7
GO:0007050	cell cycle arrest	188	4	1.28	97	0.03857	0.03857	1	1	A regulatory process that halts progression through the cell cycle during one of the normal phases (G1, S, G2, M)	0.849032	-0.950255	SKIL, CCNK, PNPT1, PIDD1, CDK9, UBC, LAMTOR4, BIN1, BRCA1, HMGN5, MDM4, PRKAA1, FOXM1, MUC1, CDK5R1, RASSF1, TFAP4, TGFB1, RBL2, CHEK2, HRAS, ING4, RPS27A, CDK1, RHEB, MAPK12, ZFHX3, KIF20B, APBB1, FOXO4, MAP2K1, CAB39, EIF2AK4, TBRG4, TNKS1BP1, WNT10B, TGFBR1	MTBP, PCNA, DDIAS, MSH2, NPM1, PRNP, PRKAB2, NKX3-1, MAP3K20, RRAGB, LAMTOR3, NOTCH2, CASP2, CNOT2, SETMAR, TRIAP1, CDK6, CNOT1, KAT2B, STRADB, CUL2, ID2, ERN1, CDKN2B, CUL5, HMGA2, PKD2, TGFB2, CNOT8, CNOT10, CDKN3
GO:0005977	glycogen metabolic process	46	2	0.31	98	0.03884	0.03884	1	1	The chemical reactions and pathways involving glycogen, a polydisperse, highly branched glucan composed of chains of D-glucose residues in alpha-(1->4) glycosidic linkage, joined together by alpha-(1->6) glycosidic linkages	0.579824	-0.557232	PPP1R3D, UBC, PYGB, STK40, GSK3B, STBD1, RPS27A, IRS1, C1QTNF2	UGP2, CALM2, PPP1R3E, GYG1, PPP1CC, PGM2, PYGL
GO:0006073	cellular glucan metabolic process	46	2	0.31	99	0.03884	0.03884	1	1	The chemical reactions and pathways involving glucans, polysaccharides consisting only of glucose residues	0.579824	-0.557232	PPP1R3D, UBC, PYGB, STK40, GSK3B, STBD1, RPS27A, IRS1, C1QTNF2	UGP2, CALM2, PPP1R3E, GYG1, PPP1CC, PGM2, PYGL
GO:0044042	glucan metabolic process	46	2	0.31	100	0.03884	0.03884	1	1	The chemical reactions and pathways involving glucans, polysaccharides consisting only of glucose residues	0.579824	-0.557232	PPP1R3D, UBC, PYGB, STK40, GSK3B, STBD1, RPS27A, IRS1, C1QTNF2	UGP2, CALM2, PPP1R3E, GYG1, PPP1CC, PGM2, PYGL
GO:1901575	organic substance catabolic process	1255	14	8.53	1602	0.03907	0.95086	1	1	The chemical reactions and pathways resulting in the breakdown of an organic substance, any molecular entity containing carbon	1.12829	-1.53982	ACAD11, PSMA6, SKP2, EGLN2, EXOSC6, RNF6, FTCD, PNPLA7, KIF14, GPC2, PPP1R3D, PNPT1, RPSA, ANAPC7, UBC, POP1, ADAM9, RPL31, PRKCE, SLC27A4, SOCS4, PDE8A, SUFU, TNRC6B, RPS10, DCTPP1, PTPN3, UBXN2A, RPS21, TET2, RNF166, RPS19, PYGB, THRA, UFL1, PFKFB4, ANAPC2, CBL, MDM4, LDLR, POMT2, GGT7, FBXL19, EDC3, HTT, ZHX2, RPL10, UQCC2, DNA2, PRKAA1, SPHK1, ANAPC11, AKR1C3, LNPEP, DDX6, RPL41, RPS8, RPS29,…	PSMD5, UBE2D3, PPT1, OMA1, RPL39, LYPLA1, RNASEH2B, MTREX, GSPT1, UCHL5, NFE2L2, EIF3E, PSMD12, USP25, TENT2, USP38, PAIP1, AZIN1, HPSE, GPD2, DIS3, GSPT2, FMN2, HSP90AA1, RPL15, BNIP3L, LIPA, TMTC3, USP14, UBE2N, TMF1, TATDN1, VPS37A, RFFL, HMMR, VPS36, PSMA1, USP9Y, ANAPC10, LUM, SNX3, ZMPSTE24, NPEPPS, TRIM13, SMURF2, SUMO1, LYPLAL1, TAF9, PSMC6, ABCD3, TOPORS, CRBN, WWP1, CDC23, PPP2R5C, UBE3…
GO:0009205	purine ribonucleoside triphosphate metab...	190	4	1.29	1213	0.03986	0.62167	1	1	The chemical reactions and pathways involving purine ribonucleoside triphosphate, a compound consisting of a purine base linked to a ribose sugar esterified with triphosphate on the sugar	0.700056	-0.984715	NDUFA11, UQCRHL, NDUFA2, NDUFB2, NME3, FIGNL1, PFKFB4, TSPO, MECP2, UQCC2, PRKAA1, NDUFA9, IMPDH1, ITPA, FLCN, UQCRQ, TGFB1, NDUFB6, COX10, SIRT6, PARG, CDK1, HIF1A, OGDH, TAZ, SURF1	ATP5F1EP2, RHOQ, UQCRB, DNM1L, MSH2, NDUFS1, AP003108.2, ATP5F1C, MOCS2, MBIP, PMPCB, AK3, NDUFA12, BPGM, SLC25A13, NFS1, HSPA8, NDUFB1, GAPDH, SDHD, NDUFA6, AK9, NME7, NDUFAF7, NMNAT1, DLD
GO:0009204	deoxyribonucleoside triphosphate catabol...	6	1	0.04	1665	0.0401	1	1	1	The chemical reactions and pathways resulting in the breakdown of a deoxyribonucleoside triphosphate, a compound consisting of a nucleobase linked to a deoxyribose sugar esterified with triphosphate on the sugar	0.158939	0.158939	DCTPP1, SAMHD1
GO:0010988	regulation of low-density lipoprotein pa...	6	1	0.04	101	0.0401	0.0401	1	1	Any process that modulates the rate, frequency or extent of low-density lipoprotein particle clearance. Low-density lipoprotein particle clearance is the process in which a low-density lipoprotein particle is removed from the blood via receptor-mediated endocytosis and its constituent parts degraded	0.192895	0.192895	CNPY2, CSK	HNRNPK
GO:0010992	ubiquitin homeostasis	6	1	0.04	102	0.0401	0.0401	1	1	Any process involved in the maintenance of an internal steady state of ubiquitin monomers and free ubiquitin chains at the level of the cell	0.0541902	0.0541902	UBC
GO:0030948	negative regulation of vascular endothel...	6	1	0.04	103	0.0401	0.0401	1	1	Any process that stops, prevents, or reduces the frequency, rate or extent of vascular endothelial growth factor receptor signaling pathway activity	0.211908	0.211908	FAM129B, HHEX, PTPN1	NEDD4
GO:0034331	cell junction maintenance	6	1	0.04	104	0.0401	0.0401	1	1	The organization process that preserves a cell junction in a stable functional or structural state. A cell junction is a specialized region of connection between two cells or between a cell and the extracellular matrix	-0.12338	-0.12338	KIFC3	PLEKHA7, RASSF8, PKP2
GO:0048312	intracellular distribution of mitochondr...	6	1	0.04	105	0.0401	0.0401	1	1	Any process that establishes the spatial arrangement of mitochondria within the cell	0.0262133	0.0262133	CLUH, MAPT, OPA1	DNM1L, SYNJ2BP
GO:0006301	postreplication repair	47	2	0.32	1666	0.04039	1	1	1	The conversion of DNA-damage induced single-stranded gaps into large molecular weight DNA after replication. Includes pathways that remove replication-blocking lesions in conjunction with DNA replication	0.574439	-0.918952	UBC, RPA3, BRCA1, WDR33, ISG15, RPS27A, USP43, RFC1	POLE2, ZBTB1, PCNA, UBE2N, MSH2, RFC4, UBE2A, DTL, PRIMPOL, POLD3, HLTF, RAD18
GO:0006672	ceramide metabolic process	49	2	0.33	106	0.04356	0.04356	1	1	The chemical reactions and pathways involving ceramides, any N-acylated sphingoid	0.693995	-0.445119	ITGB8, CERS2, CYR61, DEGS1, PRKAA1, ST3GAL5, ORMDL3, NEU3, CLN6, DEGS2	ALDH5A1, SPTSSA, UGCG, AGK, SAMD8
GO:0009199	ribonucleoside triphosphate metabolic pr...	196	4	1.33	1231	0.04386	0.63642	1	1	The chemical reactions and pathways involving a ribonucleoside triphosphate, a compound consisting of a nucleobase linked to a ribose sugar esterified with triphosphate on the sugar	0.700056	-0.984715	NDUFA11, UQCRHL, NDUFA2, NDUFB2, NME3, FIGNL1, PFKFB4, TSPO, MECP2, UQCC2, PRKAA1, NDUFA9, IMPDH1, ITPA, FLCN, UQCRQ, TGFB1, NDUFB6, UCK1, COX10, SIRT6, PARG, CDK1, HIF1A, OGDH, TAZ, SURF1	ATP5F1EP2, RHOQ, UQCRB, DNM1L, MSH2, NDUFS1, AP003108.2, ATP5F1C, MOCS2, MBIP, PMPCB, AK3, NDUFA12, BPGM, SLC25A13, NFS1, HSPA8, NDUFB1, CTPS1, GAPDH, SDHD, NDUFA6, AK9, NME7, NDUFAF7, NMNAT1, DLD
GO:0009144	purine nucleoside triphosphate metabolic...	197	4	1.34	1236	0.04454	0.63882	1	1	The chemical reactions and pathways involving purine nucleoside triphosphate, a compound consisting of a purine base linked to a ribose or deoxyribose sugar esterified with triphosphate on the sugar	0.700056	-0.984715	NDUFA11, UQCRHL, NDUFA2, NDUFB2, NME3, FIGNL1, PFKFB4, TSPO, MECP2, UQCC2, PRKAA1, NDUFA9, IMPDH1, ITPA, FLCN, UQCRQ, TGFB1, NDUFB6, SAMHD1, COX10, SIRT6, PARG, CDK1, HIF1A, OGDH, TAZ, SURF1	ATP5F1EP2, RHOQ, UQCRB, DNM1L, MSH2, NDUFS1, AP003108.2, ATP5F1C, MOCS2, MBIP, PMPCB, AK3, NDUFA12, BPGM, SLC25A13, NFS1, HSPA8, NDUFB1, GAPDH, SDHD, NDUFA6, AK9, NME7, NDUFAF7, NMNAT1, DLD
GO:0006112	energy reserve metabolic process	50	2	0.34	107	0.04518	0.04518	1	1	The chemical reactions and pathways by which a cell derives energy from stored compounds such as fats or glycogen	0.579824	-0.611524	PPP1R3D, UBC, PYGB, STK40, GSK3B, STBD1, RPS27A, IRS1, C1QTNF2	UGP2, CALM2, GFPT1, PPP1R3E, GYG1, PPP1CC, PGM2, PYGL
GO:0090502	RNA phosphodiester bond hydrolysis, endo...	50	2	0.34	1667	0.04518	1	1	1	The chemical reactions and pathways involving the hydrolysis of internal 3',5'-phosphodiester bonds in one or two strands of ribonucleotides	0.586482	-0.597997	RPSA, POP1, RPS21, EDC3, RNASEK, FCF1, TSEN54, BOP1, MRPL44	RNASEH2B, TSEN15, LACTB2, ERN1, EXO1, KIAA0391, RPP38
GO:0006930	substrate-dependent cell migration, cell...	7	1	0.05	108	0.04663	0.04663	1	1	The formation of a cell surface protrusion, such as a lamellipodium or filopodium, at the leading edge of a migrating cell	-0.299294	-0.299294	CTTN	NCK1, OPHN1, SDCBP, MYH10
GO:0010984	regulation of lipoprotein particle clear...	7	1	0.05	109	0.04663	0.04663	1	1	Any process that modulates the rate, frequency, or extent of lipoprotein particle clearance. Lipoprotein particle clearance is the process in which a lipoprotein particle is removed from the blood via receptor-mediated endocytosis and its constituent parts degraded	0.165574	0.165574	CNPY2, CSK	HNRNPK
GO:0046826	negative regulation of protein export fr...	7	1	0.05	110	0.04663	0.04663	1	1	Any process that stops, prevents, or reduces the frequency, rate or extent of the directed movement of proteins from the nucleus into the cytoplasm	0.134181	0.134181	RANGAP1
GO:0048711	positive regulation of astrocyte differe...	7	1	0.05	111	0.04663	0.04663	1	1	Any process that activates or increases the frequency, rate or extent of astrocyte differentiation	0.12526	0.12526	BIN1, NOTCH1	ID2
GO:0060263	regulation of respiratory burst	7	1	0.05	1668	0.04663	1	1	1	Any process that modulates the rate frequency or extent of a phase of elevated metabolic activity, during which oxygen consumption increases; this leads to the production, by an NADH dependent system, of hydrogen peroxide (H2O2), superoxide anions and hydroxyl radicals	0.359166	0.359166	NOXA1, RPS19, DUSP10
GO:0060347	heart trabecula formation	7	1	0.05	112	0.04663	0.04663	1	1	The process of creating a trabecula in the heart. A trabecula is a tissue element in the form of a small beam, strut or rod	0.131303	0.131303	ADAMTS1	FKBP1A, EGLN1
GO:0060713	labyrinthine layer morphogenesis	7	1	0.05	113	0.04663	0.04663	1	1	The process in which the labyrinthine layer of the placenta is generated and organized	-0.00803709	-0.00803709	CYR61	ZFP36L1, NCOA1, LEF1
GO:0075522	IRES-dependent viral translational initi...	7	1	0.05	114	0.04663	0.04663	1	1	Process by which viral mRNA translation is initiated, where a domain in the 5' untranslated region (UTR) of the viral mRNA called an internal ribosome entry site (IRES) binds the host 43S preinitiation complex, circumventing regular cap-dependent translation initiation	0.0109204	0.0109204	PTBP1	SSB
GO:0090154	positive regulation of sphingolipid bios...	7	1	0.05	115	0.04663	0.04663	1	1	Any process that increases the rate, frequency or extent of sphingolipid biosynthesis. Sphingolipid biosynthesis is the chemical reactions and pathways resulting in the formation of sphingolipids, any of a class of lipids containing the long-chain amine diol sphingosine or a closely related base (a sphingoid)	0.162736	0.162736	CYR61
GO:1902414	protein localization to cell junction	7	1	0.05	116	0.04663	0.04663	1	1	A process in which a protein is transported to, or maintained in, a location within a cell junction	0.149577	0.149577	SCRIB, LSR, MPP7, MAPK9	NECTIN3
GO:1902916	positive regulation of protein polyubiqu...	7	1	0.05	117	0.04663	0.04663	1	1	Any process that activates or increases the frequency, rate or extent of protein polyubiquitination	0.0873512	0.0873512	SKP2, XIAP	BIRC2
GO:2000009	negative regulation of protein localizat...	7	1	0.05	118	0.04663	0.04663	1	1	Any process that stops, prevents, or reduces the frequency, rate or extent of protein localization to the cell surface	0.0967567	0.0967567	TAX1BP3, LEPROT	LEPROTL1
GO:2000304	positive regulation of ceramide biosynth...	7	1	0.05	119	0.04663	0.04663	1	1	Any process that activates or increases the frequency, rate or extent of ceramide biosynthetic process	0.162736	0.162736	CYR61
GO:0090630	activation of GTPase activity	52	2	0.35	120	0.04849	0.04849	1	1		0.601318	-0.617032	TAX1BP3, TIAM1, TBC1D14, SCRIB, PLEKHG4, RALGAPA2, TBC1D13, TBC1D9, TBC1D22A, EPHA1, RCC2	RABGAP1L, RASGRF1, TBCK, RUNDC1, EIF5, WNT5A, ECT2
GO:0009056	catabolic process	1541	16	10.47	1555	0.04875	0.90011	1	1	The chemical reactions and pathways resulting in the breakdown of substances, including the breakdown of carbon compounds with the liberation of energy for use by the cell or organism	1.1293	-1.62032	ACAD11, PSMA6, SKP2, EGLN2, EXOSC6, RNF6, FTCD, PNPLA7, KIF14, VPS13C, GPC2, SNAP29, PIK3C2B, PPP1R3D, PNPT1, RPSA, ACBD5, ANAPC7, UBC, POP1, ADAM9, RPL31, LAMTOR4, PRKCE, SLC27A4, SOCS4, PDE8A, SUFU, TNRC6B, RPS10, DCTPP1, PTPN3, UBXN2A, RPS21, TBC1D14, TET2, RNF166, RPS19, PYGB, THRA, UFL1, TOMM5, PFKFB4, TSPO, ANAPC2, DAPK3, CBL, MDM4, LDLR, POMT2, GGT7, TRIM5, FBXL19, IKBKG, EDC3, HTT, ZHX2, …	ITGB1, PSMD5, UBE2D3, PPT1, OMA1, RPL39, LYPLA1, RNASEH2B, MTREX, GSPT1, UCHL5, NFE2L2, EIF3E, COL11A1, PSMD12, USP25, TENT2, USP38, PAIP1, AZIN1, HPSE, GPD2, DIS3, GSPT2, FMN2, HSP90AA1, RPL15, BNIP3L, LIPA, DNM1L, TMTC3, USP14, UBE2N, TMF1, TATDN1, VPS37A, RFFL, SNX14, HMMR, CSNK2A2, TMEM59, VPS36, DRAM2, PSMA1, USP9Y, ANAPC10, WDR75, LUM, TOMM20, SNX3, ZMPSTE24, NPEPPS, TRIM13, SMURF2, SUMO1, …
GO:0009150	purine ribonucleotide metabolic process	295	5	2	1017	0.04946	0.49226	1	1	The chemical reactions and pathways involving a purine ribonucleotide, a compound consisting of ribonucleoside (a purine base linked to a ribose sugar) esterified with a phosphate group at either the 3' or 5'-hydroxyl group of the sugar	0.746281	-1.19172	NDUFA11, UQCRHL, MC1R, ADSS, PDE8A, MRAP, NDUFA2, NDUFB2, NME3, FIGNL1, BPNT1, PFKFB4, TSPO, SCRIB, MECP2, UQCC2, PRKAA1, NDUFA9, IMPDH1, ITPA, FLCN, UQCRQ, TGFB1, NDUFB6, RAMP1, CASK, NUDT18, COX10, PPCDC, PDE7A, SIRT6, PARG, CDK1, HMGCR, HIF1A, PDE8B, AKAP12, OGDH, TAZ, SURF1	PPCS, ATP5F1EP2, LINC02210-CRHR1, RHOQ, ADNP, UQCRB, DNM1L, MSH2, NDUFS1, PANK1, SLC35B3, CALM2, AP003108.2, ATP5F1C, MOCS2, MCCC2, MBIP, PMPCB, AK3, NDUFA12, TBL1XR1, HPRT1, GABBR1, NT5E, BPGM, PRPS1, SLC25A13, NFS1, WNT5A, HSPA8, NDUFB1, AKAP9, GAPDH, LTB4R2, NF1, PKD2, PANK2, SDHD, NDUFA6, AK9, EGLN1, NME7, PAICS, NDUFAF7, NMNAT1, DLD, NPR3

## Sheet: top 250 upreg
GO id	Term	Genes in genome (background)	Genes in top-250 upreg	Expected genes in top-250 upreg	Rank in P.Fisher.elim	P.Fisher	P.Fisher.elim	FDR.Fisher	FDR.Fisher.elim	Description	Avg.LogFC for top-10 upreg	Avg.LogFC for top-10 downreg	Upreg genes (LogFC > 0.4)	Downreg genes (LogFC < -0.4)
GO:0006614	SRP-dependent cotranslational protein ta...	93	14	2.05	1	1.3e-08	1.3e-08	0.00013	0.00013	The targeting of proteins to a membrane that occurs during translation and is dependent upon two key components, the signal-recognition particle (SRP) and the SRP receptor. SRP is a cytosolic particle that transiently binds to the endoplasmic reticulum (ER) signal sequence in a nascent protein, to the large ribosomal unit, and to the SRP receptor in the ER membrane	0.666801	-0.856893	RPSA, RPL31, RPS10, RPS21, RPS19, RPL10, RPL41, RPS8, RPS29, RPS12, RPL21, RPL35A, RPL37A, RPLP2, RPS27A, RPL34, RPS23, RPS28	SRP19, RPL39, RPL15, RPL36A, SRP72, SRP54, SRP14, RPL17-C18orf32, SRP9, RPL9, RPL17
GO:0006613	cotranslational protein targeting to mem...	98	14	2.16	3390	2.6e-08	1	0.00013	1	The targeting of proteins to a membrane that occurs during translation. The transport of most secretory proteins, particularly those with more than 100 amino acids, into the endoplasmic reticulum lumen occurs in this manner, as does the import of some proteins into mitochondria	0.666801	-0.856893	RPSA, RPL31, RPS10, RPS21, RPS19, RPL10, RPL41, RPS8, RPS29, RPS12, RPL21, RPL35A, RPL37A, RPLP2, RPS27A, RPL34, RPS23, RPS28	SRP19, RPL39, RPL15, RPL36A, SRP72, SRP54, SRP14, RPL17-C18orf32, SRP9, RPL9, RPL17, TRAM1, SSR1
GO:0045047	protein targeting to ER	102	14	2.25	3391	4.4e-08	1	0.000146667	1	The process of directing proteins towards the endoplasmic reticulum (ER) using signals contained within the protein. One common mechanism uses a 16- to 30-residue signal sequence, typically located at the N-terminus of the protein and containing positively charged amino acids followed by a continuous stretch of hydrophobic residues, which directs the ribosome to the ER membrane and initiates tran…	0.666801	-0.85819	RPSA, RPL31, RPS10, RPS21, RPS19, RPL10, RPL41, RPS8, RPS29, RPS12, RPL21, RPL35A, RPL37A, RPLP2, RPS27A, RPL34, RPS23, PMM1, RPS28	SRP19, RPL39, RPL15, RPL36A, SRP72, SRP54, SRP14, SPCS2, RPL17-C18orf32, SRP9, RPL9, RPL17
GO:0072599	establishment of protein localization to...	105	14	2.32	3392	6.4e-08	1	0.00016	1	The directed movement of a protein to a specific location in the endoplasmic reticulum	0.666801	-0.868825	RPSA, RPL31, RPS10, RPS21, RPS19, RPL10, RPL41, RPS8, RPS29, RPS12, RPL21, RPL35A, RPL37A, RPLP2, RPS27A, RPL34, RPS23, PMM1, RAB3GAP1, RPS28	SRP19, RPL39, RPL15, RPL36A, SRP72, RAB10, SRP54, SRP14, SPCS2, RPL17-C18orf32, SRP9, RPL9, RPL17
GO:0000184	nuclear-transcribed mRNA catabolic proce...	119	14	2.62	2	3.2e-07	3.2e-07	0.00064	0.0016	The nonsense-mediated decay pathway for nuclear-transcribed mRNAs degrades mRNAs in which an amino-acid codon has changed to a nonsense codon; this prevents the translation of such mRNAs into truncated, and potentially harmful, proteins	0.666801	-1.00025	RPSA, RPL31, RPS10, RPS21, RPS19, RPL10, RPL41, RPS8, RPS29, RPS12, RPL21, RPL35A, RPL37A, RPLP2, RPS27A, RPL34, RPS23, RPS28	RPL39, GSPT1, EIF3E, GSPT2, RPL15, UPF2, RPL36A, PPP2R2A, PNRC2, RPL17-C18orf32, RPL9, RPL17, PABPC1, SMG8
GO:0070972	protein localization to endoplasmic reti...	121	14	2.67	3393	3.9e-07	1	0.00065	1	A process in which a protein is transported to, or maintained in, a location within the endoplasmic reticulum	0.666801	-0.966198	RPSA, RPL31, RPS10, RPS21, RPS19, RPL10, RPL41, RPS8, RPS29, RPS12, RPL21, RPL35A, RPL37A, RPLP2, RPS27A, RPL34, RPS23, PMM1, UBAC2, HSPA5, KDELR2, RAB3GAP1, RPS28	SRP19, RPL39, RPL15, KDELR3, RTN4, VAPA, RPL36A, SRP72, RAB10, SRP54, SRP14, SPCS2, RPL17-C18orf32, SRP9, RPL9, RPL17
GO:0000956	nuclear-transcribed mRNA catabolic proce...	190	16	4.19	1944	4.2e-06	0.43607	0.006	1	The chemical reactions and pathways resulting in the breakdown of nuclear-transcribed mRNAs in eukaryotic cells	0.738539	-1.19018	EXOSC6, RPSA, RPL31, TNRC6B, RPS10, RPS21, RPS19, EDC3, RPL10, DDX6, RPL41, RPS8, RPS29, RPS12, LSM5, RPL21, RPL35A, THRAP3, RPL37A, RPLP2, RPS27A, RPL34, RPS23, XRN1, TNKS1BP1, EXOSC7, RPS28	RPL39, GSPT1, EIF3E, TENT2, PAIP1, DIS3, GSPT2, RPL15, UPF2, TTC37, LSM1, EXOSC3, DDX5, RPL36A, PPP2R2A, SSB, EIF4B, PNRC2, RC3H1, CNOT2, EIF4E, PATL1, CNOT1, RPL17-C18orf32, RPL9, RPL17, EIF4A2, ZFP36L1, EXOSC9, HBS1L, PABPC1, CNOT8, CNOT10, SMG8
GO:0044033	multi-organism metabolic process	193	16	4.26	598	5.2e-06	0.1221	0.0065	1	A metabolic process - chemical reactions and pathways, including anabolism and catabolism, by which living organisms transform chemical substances - which involves more than one organism	0.698558	-1.07424	CDK9, RPSA, RPL31, RPS10, RPS21, RPS19, RPL10, RPL41, RPS8, RPS29, MAP2K3, TFAP4, TOP2A, RPS12, RPL21, PTBP1, RPL35A, RPL37A, RPLP2, RPS27A, RPL34, RPS23, CTDP1, POM121C, TARBP2, NELFB, MAP2K1, RAE1, JUN, EIF2AK4, TRIM32, RPS28	RPL39, MAP2K4, MON1B, RPL15, GTF2B, NUPL2, TRIM13, NUP35, NUP54, GTF2F2, NUP37, NUP205, ATG5, RPL36A, NUP88, ZNF639, SSB, FMR1, RPL17-C18orf32, RPL9, RPL17, CCNT1, POLR2A, HMGA2, NUP43, SP1, TRIM21, LEF1, CHD1
GO:0019080	viral gene expression	175	15	3.86	1027	6.9e-06	0.20725	0.00718182	1	A process by which a viral gene is converted into a mature gene product or products (proteins or RNA). This includes viral transcription, processing to produce a mature RNA product, and viral translation	0.698558	-1.03228	CDK9, RPSA, RPL31, RPS10, RPS21, RPS19, RPL10, RPL41, RPS8, RPS29, TFAP4, RPS12, RPL21, PTBP1, RPL35A, RPL37A, RPLP2, RPS27A, RPL34, RPS23, CTDP1, POM121C, TARBP2, NELFB, RAE1, JUN, EIF2AK4, TRIM32, RPS28	RPL39, MON1B, RPL15, GTF2B, NUPL2, TRIM13, NUP35, NUP54, GTF2F2, NUP37, NUP205, RPL36A, NUP88, ZNF639, SSB, RPL17-C18orf32, RPL9, RPL17, CCNT1, POLR2A, HMGA2, NUP43, SP1, TRIM21, LEF1, CHD1
GO:0006612	protein targeting to membrane	155	14	3.42	3394	7.7e-06	1	0.00718182	1	The process of directing proteins towards a membrane, usually using signals contained within the protein	0.671949	-1.00008	RPSA, RPL31, RPS10, RPS21, RPS19, RPL10, RAB8B, CDK5R1, RPL41, RPS8, RPS29, RPS12, RPL21, RPL35A, MIEF1, RPL37A, RPLP2, MIEF2, ATG4B, RPS27A, PACS2, RPL34, RPS23, PEX5, RPS28	SRP19, RPL39, RPL15, PEX3, NUP54, PRNP, SDCBP, GOLGA7, MFF, RPL36A, SRP72, SRP54, SRP14, RPL17-C18orf32, SRP9, ATG4A, RPL9, RPL17, MTCL1, C2CD5, TRAM1, SSR1, STOM, FYN
GO:0006413	translational initiation	177	15	3.9	3	7.9e-06	7.9e-06	0.00718182	0.0263333	The process preceding formation of the peptide bond between the first two amino acids of a protein. This includes the formation of a complex of the ribosome, mRNA, and an initiation complex that contains the first aminoacyl-tRNA	0.686162	-1.17049	RPSA, RPL31, EIF2B1, RPS10, RPS21, RPS19, RPL10, RPL41, RPS8, RPS29, RPS12, DNAJC3, RPL21, PTBP1, RPL35A, RPL37A, RPLP2, RPS27A, EIF1AX, RPL34, RPS23, EIF2AK4, RPS28	EIF3M, RPL39, EIF3E, PAIP1, RPL15, EIF2AK2, PPP1R15B, EIF2A, NPM1, NCK1, EIF1B, EIF3J, EIF3H, MTIF3, RPL36A, ALKBH1, YAE1D1, SSB, EIF4B, FMR1, EIF4E, RPS6KB1, ABCE1, C8orf88, GLE1, RPL17-C18orf32, RPL9, MTFMT, EIF5, RPL17, EIF4A2, EIF4H, DHX29, PABPC1, EIF5B, PAIP2, EIF2B2
GO:0006402	mRNA catabolic process	205	16	4.52	2303	1.1e-05	0.53677	0.00916667	1	The chemical reactions and pathways resulting in the breakdown of mRNA, messenger RNA, which is responsible for carrying the coded genetic 'message', transcribed from DNA, to sites of protein assembly at the ribosomes	0.768752	-1.19018	EXOSC6, PNPT1, RPSA, RPL31, TNRC6B, RPS10, RPS21, RPS19, EDC3, ZHX2, RPL10, DDX6, RPL41, RPS8, RPS29, RPS12, LSM5, RPL21, RPL35A, THRAP3, RPL37A, RNH1, RPLP2, RPS27A, RPL34, RPS23, XRN1, TNKS1BP1, EXOSC7, RPS28	RPL39, GSPT1, EIF3E, TENT2, PAIP1, DIS3, GSPT2, RPL15, UPF2, TTC37, LSM1, HNRNPR, EXOSC3, DDX5, RPL36A, PPP2R2A, ZC3HAV1, SSB, EIF4B, FMR1, PNRC2, RC3H1, CNOT2, EIF4E, PATL1, CNOT1, RPL17-C18orf32, SUPV3L1, RPL9, RPL17, ERN1, EIF4A2, ZFP36L1, EXOSC9, HBS1L, PABPC1, CNOT8, CNOT10, SMG8
GO:0019083	viral transcription	164	14	3.62	4	1.5e-05	1.5e-05	0.01	0.0375	The process by which a viral genome, or part of a viral genome, is transcribed within the host cell	0.698558	-1.03228	CDK9, RPSA, RPL31, RPS10, RPS21, RPS19, RPL10, RPL41, RPS8, RPS29, TFAP4, RPS12, RPL21, RPL35A, RPL37A, RPLP2, RPS27A, RPL34, RPS23, CTDP1, POM121C, TARBP2, NELFB, RAE1, JUN, TRIM32, RPS28	RPL39, MON1B, RPL15, GTF2B, NUPL2, TRIM13, NUP35, NUP54, GTF2F2, NUP37, NUP205, RPL36A, NUP88, ZNF639, RPL17-C18orf32, RPL9, RPL17, CCNT1, POLR2A, HMGA2, NUP43, SP1, TRIM21, LEF1, CHD1
GO:0006364	rRNA processing	234	17	5.16	6	1.5e-05	0.00016	0.01	0.266667	Any process involved in the conversion of a primary ribosomal RNA (rRNA) transcript into one or more mature rRNA molecules	0.867013	-1.19386	NSUN5P2, EXOSC6, C1D, RPSA, RPL31, RPS10, RPS21, NSUN5P1, RPS19, DHX37, RPL10, RPL41, RPS8, RPS29, RPS12, NPM3, NSUN5, RPL21, RPL35A, RRNAD1, RPL37A, FCF1, RPLP2, RPS27A, UTP11, RPL34, RPS23, NHP2, BOP1, DDX49, EXOSC7, RPS28	RPL39, MTREX, RPF1, MPHOSPH10, DIS3, UTP3, RPL15, WDR75, MRPL1, DDX21, NOP58, SBDS, HEATR1, RRP15, EXOSC3, THUMPD1, MRPS9, RPL36A, TRMT61B, BMT2, MAK16, UTP4, NOL11, UTP15, FRG1, RPL17-C18orf32, RPL9, RPL17, IMP4, LTV1, EXOSC9, PNO1, MPHOSPH6, DCAF13, RPP38
GO:0042254	ribosome biogenesis	284	19	6.26	1263	1.5e-05	0.26199	0.01	1	A cellular process that results in the biosynthesis of constituent macromolecules, assembly, and arrangement of constituent parts of ribosome subunits; includes transport to the sites of protein synthesis	0.874758	-1.21883	NSUN5P2, EXOSC6, C1D, RPSA, RPL31, RPS10, ZNF593, RPS21, NSUN5P1, RPS19, DHX37, RPL10, RPL41, RPS8, RPS29, RPS12, DDX28, NPM3, NSUN5, RPL21, RPL35A, NOP53, RRNAD1, RPL37A, FCF1, RPLP2, URB2, RPS27A, UTP11, RPL34, RPS23, NHP2, BOP1, RPS27L, AAMP, DDX49, EXOSC7, RPS28	RPL39, MTREX, RPF1, BRIX1, MPHOSPH10, DIS3, UTP3, RPL15, WDR75, MRPL1, EIF2A, DDX21, NPM1, NOP58, SBDS, HEATR1, RRP15, MTERF3, EXOSC3, THUMPD1, MRPS9, RPL36A, SDAD1, TRMT61B, NUP88, MALSU1, YAE1D1, BMT2, MAK16, UTP4, NOL11, UTP15, ABCE1, FRG1, RPL17-C18orf32, RPL9, RPL17, IMP4, LTV1, ZNHIT6, EXOSC9, FASTKD2, RIOX2, PNO1, MPHOSPH6, DCAF13, GNL3L, RPP38
GO:0034655	nucleobase-containing compound catabolic...	299	19	6.6	1492	3.2e-05	0.31929	0.02	1	The chemical reactions and pathways resulting in the breakdown of nucleobases, nucleosides, nucleotides and nucleic acids	0.80284	-1.32484	EXOSC6, PNPT1, RPSA, POP1, RPL31, PDE8A, TNRC6B, RPS10, DCTPP1, RPS21, RPS19, EDC3, ZHX2, RPL10, DNA2, DDX6, RPL41, RPS8, RPS29, ITPA, RPS12, LSM5, RPL21, RPL35A, THRAP3, NUDT18, SAMHD1, RPL37A, RNH1, NTHL1, RPLP2, RPS27A, PDE7A, DNASE1L2, RPL34, RPS23, HSF1, DPYD, PDE8B, DNASE1, XRN1, CASP3, TNKS1BP1, H1F0, EXOSC7, RPS28	RPL39, RNASEH2B, MTREX, GSPT1, EIF3E, TENT2, PAIP1, DIS3, GSPT2, RPL15, TATDN1, UPF2, TTC37, LSM1, HNRNPR, EXOSC3, DDX5, RPL36A, PPP2R2A, ZC3HAV1, SSB, EIF4B, FMR1, PNRC2, RC3H1, HPRT1, UNG, CNOT2, SETMAR, EIF4E, PATL1, CNOT1, NT5E, RPL17-C18orf32, SUPV3L1, RPL9, RPL17, ERN1, MBD4, EIF4A2, ZFP36L1, NUDT12, EXOSC9, HBS1L, PABPC1, APOBEC3C, HNRNPD, SMPDL3A, PPP1R8, EGLN1, OGG1, CNOT8, LRPPRC, CNOT1…
GO:0006401	RNA catabolic process	226	16	4.99	2668	3.8e-05	0.65583	0.0223529	1	The chemical reactions and pathways resulting in the breakdown of RNA, ribonucleic acid, one of the two main type of nucleic acid, consisting of a long, unbranched macromolecule formed from ribonucleotides joined in 3',5'-phosphodiester linkage	0.789055	-1.32484	EXOSC6, PNPT1, RPSA, POP1, RPL31, TNRC6B, RPS10, RPS21, RPS19, EDC3, ZHX2, RPL10, DNA2, DDX6, RPL41, RPS8, RPS29, RPS12, LSM5, RPL21, RPL35A, THRAP3, RPL37A, RNH1, RPLP2, RPS27A, RPL34, RPS23, XRN1, TNKS1BP1, EXOSC7, RPS28	RPL39, RNASEH2B, MTREX, GSPT1, EIF3E, TENT2, PAIP1, DIS3, GSPT2, RPL15, UPF2, TTC37, LSM1, HNRNPR, EXOSC3, DDX5, RPL36A, PPP2R2A, ZC3HAV1, SSB, EIF4B, FMR1, PNRC2, RC3H1, CNOT2, EIF4E, PATL1, CNOT1, RPL17-C18orf32, SUPV3L1, RPL9, RPL17, ERN1, EIF4A2, ZFP36L1, EXOSC9, HBS1L, PABPC1, HNRNPD, PPP1R8, CNOT8, LRPPRC, CNOT10, SMG8
GO:1901361	organic cyclic compound catabolic proces...	332	20	7.32	1329	4.2e-05	0.28202	0.0233333	1	The chemical reactions and pathways resulting in the breakdown of organic cyclic compound	0.836732	-1.32484	EXOSC6, FTCD, PNPT1, RPSA, POP1, RPL31, PDE8A, TNRC6B, RPS10, DCTPP1, RPS21, TET2, RPS19, EDC3, ZHX2, RPL10, DNA2, DDX6, RPL41, RPS8, RPS29, ITPA, RPS12, LSM5, RPL21, RPL35A, THRAP3, NUDT18, SAMHD1, RPL37A, RNH1, NTHL1, RPLP2, SNX17, ALDH4A1, RPS27A, PDE7A, DNASE1L2, RPL34, RPS23, HSF1, DPYD, PDE8B, DNASE1, XRN1, CASP3, TNKS1BP1, H1F0, EXOSC7, RPS28	RPL39, RNASEH2B, MTREX, GSPT1, EIF3E, TENT2, PAIP1, DIS3, GSPT2, RPL15, TATDN1, UPF2, YWHAH, HNMT, TTC37, LSM1, HNRNPR, EXOSC3, DDX5, RPL36A, SPP1, HSD17B11, PPP2R2A, ZC3HAV1, SSB, EIF4B, FMR1, PNRC2, RC3H1, HPRT1, UNG, CNOT2, SETMAR, EIF4E, PATL1, CNOT1, NT5E, RPL17-C18orf32, SUPV3L1, RPL9, RPL17, ERN1, MBD4, EIF4A2, ZFP36L1, NUDT12, EXOSC9, HBS1L, PABPC1, APOBEC3C, HNRNPD, SMPDL3A, PPP1R8, EGLN…
GO:0022613	ribonucleoprotein complex biogenesis	396	22	8.74	1174	5.8e-05	0.23733	0.0305263	1	A cellular process that results in the biosynthesis of constituent macromolecules, assembly, and arrangement of constituent parts of a complex containing RNA and proteins. Includes the biosynthesis of the constituent RNA and protein molecules, and those macromolecular modifications that are involved in synthesis or assembly of the ribonucleoprotein complex	0.916105	-1.29519	NSUN5P2, NUFIP1, EXOSC6, C1D, RPSA, RPL31, RPS10, ZNF593, RPS21, NSUN5P1, RPS19, DDX20, DHX37, EDC3, RPL10, DDX6, RPL41, RPS8, RPS29, RPS12, DDX28, NPM3, NSUN5, RPL21, RPL35A, SNRPB, NOP53, RRNAD1, RPL37A, FCF1, RPLP2, URB2, RPS27A, GEMIN8, UTP11, RPL34, RPS23, NHP2, RBM5, TARBP2, BOP1, SNRNP200, CD2BP2, TGS1, RPS27L, GEMIN7, AAMP, DDX49, EXOSC7, RPS28	SLU7, RPL39, MTREX, RPF1, BRIX1, MPHOSPH10, DIS3, UTP3, HSP90AA1, RPL15, PTGES3, WDR75, MRPL1, EIF2A, DDX21, NPM1, NOP58, PUM2, TAF9, SBDS, STRAP, HEATR1, RRP15, MTERF3, EXOSC3, THUMPD1, MRPS9, RPL36A, SRPK1, SDAD1, TRMT61B, NUP88, MALSU1, YAE1D1, EIF4B, BMT2, MAK16, RC3H1, UTP4, RBMX, NOL11, CNOT2, UTP15, PATL1, ABCE1, CNOT1, FRG1, RPL17-C18orf32, RPL9, EIF5, CRNKL1, PRPF39, RPL17, IMP4, LTV1, Z…
GO:0016072	rRNA metabolic process	262	17	5.78	3395	6.5e-05	1	0.0325	1	The chemical reactions and pathways involving rRNA, ribosomal RNA, a structural constituent of ribosomes	0.867013	-1.19386	NSUN5P2, EXOSC6, C1D, RPSA, RPL31, RPS10, RPS21, NSUN5P1, RPS19, DHX37, RNASEK, RPL10, RPL41, RPS8, RPS29, BRF1, RPS12, NPM3, NSUN5, RPL21, RPL35A, RRNAD1, RPL37A, FCF1, RPLP2, RPS27A, UTP11, RPL34, RPS23, NHP2, BOP1, GTF3C1, CD3EAP, XRN1, DDX49, EXOSC7, RPS28	RPL39, MTREX, RPF1, MPHOSPH10, DIS3, UTP3, RPL15, WDR75, MRPL1, DDX21, NOP58, SBDS, NIFK, HEATR1, RRP15, EXOSC3, THUMPD1, MRPS9, RPL36A, TRMT61B, BMT2, MAK16, UTP4, NOL11, UTP15, FRG1, RPL17-C18orf32, RPL9, RPL17, IMP4, LTV1, EXOSC9, PNO1, MPHOSPH6, DCAF13, RPP38
GO:0046700	heterocycle catabolic process	317	19	6.99	1782	7e-05	0.39372	0.0326087	1	The chemical reactions and pathways resulting in the breakdown of heterocyclic compounds, those with a cyclic molecular structure and at least two different atoms in the ring (or rings)	0.836732	-1.32484	EXOSC6, FTCD, PNPT1, RPSA, POP1, RPL31, PDE8A, TNRC6B, RPS10, DCTPP1, RPS21, TET2, RPS19, EDC3, ZHX2, RPL10, DNA2, DDX6, RPL41, RPS8, RPS29, ITPA, RPS12, LSM5, RPL21, RPL35A, THRAP3, NUDT18, SAMHD1, RPL37A, RNH1, NTHL1, RPLP2, ALDH4A1, RPS27A, PDE7A, DNASE1L2, RPL34, RPS23, HSF1, DPYD, PDE8B, DNASE1, XRN1, CASP3, TNKS1BP1, H1F0, EXOSC7, RPS28	RPL39, RNASEH2B, MTREX, GSPT1, EIF3E, TENT2, PAIP1, DIS3, GSPT2, RPL15, TATDN1, UPF2, HNMT, TTC37, LSM1, HNRNPR, EXOSC3, DDX5, RPL36A, PPP2R2A, ZC3HAV1, SSB, EIF4B, FMR1, PNRC2, RC3H1, HPRT1, UNG, CNOT2, SETMAR, EIF4E, PATL1, CNOT1, NT5E, RPL17-C18orf32, SUPV3L1, RPL9, RPL17, ERN1, MBD4, EIF4A2, ZFP36L1, NUDT12, EXOSC9, HBS1L, PABPC1, APOBEC3C, HNRNPD, SMPDL3A, PPP1R8, EGLN1, OGG1, CNOT8, LRPPRC,…
GO:0044270	cellular nitrogen compound catabolic pro...	318	19	7.01	1787	7.3e-05	0.39786	0.0326087	1	The chemical reactions and pathways resulting in the breakdown of organic and inorganic nitrogenous compounds	0.836732	-1.32484	EXOSC6, FTCD, PNPT1, RPSA, POP1, RPL31, PDE8A, TNRC6B, RPS10, DCTPP1, RPS21, TET2, RPS19, EDC3, ZHX2, RPL10, DNA2, DDX6, RPL41, RPS8, RPS29, TST, ITPA, RPS12, LSM5, RPL21, RPL35A, THRAP3, NUDT18, SAMHD1, RPL37A, RNH1, NTHL1, RPLP2, RPS27A, PDE7A, DNASE1L2, RPL34, RPS23, HSF1, DPYD, PDE8B, DNASE1, XRN1, CASP3, TNKS1BP1, H1F0, EXOSC7, RPS28	RPL39, RNASEH2B, MTREX, GSPT1, EIF3E, TENT2, PAIP1, DIS3, GSPT2, RPL15, TATDN1, UPF2, HNMT, TTC37, LSM1, HNRNPR, EXOSC3, DDX5, RPL36A, PPP2R2A, ZC3HAV1, SSB, EIF4B, FMR1, PNRC2, RC3H1, HPRT1, UNG, CNOT2, SETMAR, EIF4E, PATL1, CNOT1, NT5E, RPL17-C18orf32, SUPV3L1, RPL9, RPL17, ERN1, MBD4, EIF4A2, ZFP36L1, NUDT12, EXOSC9, HBS1L, PABPC1, APOBEC3C, HNRNPD, SMPDL3A, PPP1R8, EGLN1, OGG1, CNOT8, LRPPRC,…
GO:0019058	viral life cycle	346	20	7.63	891	7.5e-05	0.1807	0.0326087	1	A set of processes which all viruses follow to ensure survival; includes attachment and entry of the virus particle, decoding of genome information, translation of viral mRNA by host ribosomes, genome replication, and assembly and release of viral particles containing the genome	0.820284	-1.27004	PKN2, CCNK, CDK9, RPSA, UBC, RPL31, RPS10, RPS21, RPS19, NOTCH1, TAP2, LDLR, TRIM5, RPL10, TAP1, DDX6, RPL41, RPS8, RPS29, P4HB, TFAP4, TOP2A, RPS12, SIVA1, ISG15, RPL21, PTBP1, RPL35A, RPL37A, MAVS, RPLP2, RPS27A, CHMP7, CHMP1A, RPL34, RPS23, CTDP1, POM121C, BANF1, TNIP1, HYAL2, TARBP2, NELFB, RAE1, JUN, PC, EIF2AK4, TRIM32, RPS28	ITGB1, XPR1, RPL39, MON1B, RPL15, EIF2AK2, GTF2B, VPS37A, SNX3, NUPL2, TRIM13, VTA1, NUP35, NUP54, GTF2F2, CHMP2B, WWP1, KPNA3, OAS3, AC068234.1, FAM111A, NUP37, NUP205, IFIT5, VAPA, DDX5, ATG5, RPL36A, SRPK1, RAB1A, NUP88, ZC3HAV1, ZNF639, SSB, DERL1, FMR1, YTHDC2, PDCD6IP, HACD3, CHMP3, RPL17-C18orf32, KPNA4, RPL9, THOC2, RPL17, AXL, HSPA8, PPID, PABPC1, CCNT1, UBP1, APOBEC3C, POLR2A, PPIA, HMG…
GO:0019439	aromatic compound catabolic process	324	19	7.15	1900	9.4e-05	0.42265	0.0391667	1	The chemical reactions and pathways resulting in the breakdown of aromatic compounds, any substance containing an aromatic carbon ring	0.836732	-1.32484	EXOSC6, FTCD, PNPT1, RPSA, POP1, RPL31, PDE8A, TNRC6B, RPS10, DCTPP1, RPS21, RPS19, EDC3, ZHX2, RPL10, DNA2, DDX6, RPL41, RPS8, RPS29, ITPA, RPS12, LSM5, RPL21, RPL35A, THRAP3, NUDT18, SAMHD1, RPL37A, RNH1, NTHL1, RPLP2, RPS27A, PDE7A, DNASE1L2, RPL34, RPS23, HSF1, DPYD, PDE8B, DNASE1, XRN1, CASP3, TNKS1BP1, H1F0, EXOSC7, RPS28	RPL39, RNASEH2B, MTREX, GSPT1, EIF3E, TENT2, PAIP1, DIS3, GSPT2, RPL15, TATDN1, UPF2, HNMT, TTC37, LSM1, HNRNPR, EXOSC3, DDX5, RPL36A, PPP2R2A, ZC3HAV1, SSB, EIF4B, FMR1, PNRC2, RC3H1, HPRT1, UNG, CNOT2, SETMAR, EIF4E, PATL1, CNOT1, NT5E, RPL17-C18orf32, SUPV3L1, RPL9, RPL17, ERN1, MBD4, EIF4A2, ZFP36L1, NUDT12, EXOSC9, HBS1L, PABPC1, APOBEC3C, HNRNPD, SMPDL3A, PPP1R8, EGLN1, PON2, OGG1, CNOT8, L…
GO:0072594	establishment of protein localization to...	501	25	11.05	1103	0.0001	0.22537	0.04	1	The directed movement of a protein to a specific location on or in an organelle. Encompasses establishment of localization in the membrane or lumen of a membrane-bounded organelle	0.79475	-1.42658	IPO4, PBLD, RPSA, RPL31, AP3D1, SUFU, RPS10, RPS21, NRAS, RPS19, KPNA6, WRAP53, TNPO2, DNAJC19, THRA, TOMM5, TSPO, SMAD4, SCRIB, DNLZ, RPL10, TOMM40L, SPHK1, AKR1C3, RAB8B, UBL5, RPL41, RPS8, RPS29, NLRP3, NFKBIE, TSPAN17, RPS12, VTI1A, CDH1, LEPROT, GSK3B, TGFB1, TOMM7, CCDC22, IFT122, MAPT, RPL21, RPL35A, NAGPA, LMNA, RPL37A, MAVS, BAP1, PPP3R1, RPLP2, SREBF1, PEX6, RPS27A, TSPAN10, CDK1, STIMA…	POT1, UBE2D3, SRP19, RPL39, NOV, TNPO1, PIK3R1, HSP90AA1, RPL15, YWHAZ, BNIP3L, CSNK2A2, VPS36, PEX3, WDR75, TOMM20, NPEPPS, NCOA4, NUP35, RAB11A, NUP54, AP3B1, AP3M1, KPNA3, HSPH1, PEX12, YWHAH, CALM2, HNMT, ZFAND6, DNAJA1, TCP1, FBXW7, EGFR, MFF, ZFYVE16, RAB6A, RPL36A, MAPK8, SRP72, NUP88, LAMP2, RAB10, SRP54, SH3GLB1, RANBP6, SRP14, PEX1, HSPA4, GREM1, SPCS2, RPL17-C18orf32, MED1, KPNA4, PEX2…
GO:1901564	organonitrogen compound metabolic proces...	1465	53	32.32	1719	0.00011	0.38084	0.0423077	1	The chemical reactions and pathways involving organonitrogen compound	1.21647	-1.5776	SPNS2, ITGB8, PSMA6, CERS2, EGLN2, FTCD, GPC2, MEX3D, EEF2K, GTF2H3, SLC25A32, NDUFA11, THTPA, RPSA, UQCRHL, MBOAT2, PXYLP1, MTHFR, ARSI, MC1R, PSPH, CYR61, RPL31, MTPN, IGFBP5, DEGS1, EIF2B1, ADSS, SLC22A5, PDE8A, TNRC6B, MRAP, RPS10, NDUFA2, PDXK, DCTPP1, MRPL54, ST3GAL2, RPS21, SLC19A1, TET2, OSBPL5, CSGALNACT2, RPS19, NDUFB2, NME3, UMPS, NAGS, RFK, SECISBP2L, FIGNL1, BPNT1, PFKFB4, TSPO, DAPK…	PSMD5, EXTL2, PPT1, PPCS, ATP5F1EP2, EIF3M, MRPS30, RPL39, GSPT1, MMADHC, LINC02210-CRHR1, CPD, NFE2L2, EIF3E, PSMD12, PAIP1, AZIN1, HPSE, RHOQ, PRKD3, ADNP, CPE, SLC22A4, GSPT2, HSP90AA1, AASDH, RPL15, UQCRB, EIF2AK2, DNM1L, CPA3, MRPL3, HMMR, CSNK2A2, PSMA1, MRPL1, LUM, MSH2, PPP1R15B, ERO1A, EIF2A, NPEPPS, IARS, FAM129A, EEF1E1, IREB2, NPM1, NCK1, PUM2, NAMPT, ARG2, PSMC6, GCH1, EIF1B, ARSK, C…
GO:0016032	viral process	699	31	15.42	267	0.00013	0.05461	0.0481481	1	A multi-organism process in which a virus is a participant. The other participant is the host. Includes infection of a host cell, replication of the viral genome, and assembly of progeny virus particles. In some cases the viral genetic material may integrate into the host genome and only subsequently, under particular circumstances, 'complete' its life cycle	0.934297	-1.37583	CARD9, PKN2, POLR3K, CCNK, CDK9, RPSA, UBC, CREBZF, GFI1, RPL31, IFNGR2, BIN1, CHUK, TAF4, CAMLG, RPS10, RPS21, RPS19, NOTCH1, TAP2, SCRIB, LDLR, TRIM5, SUPT6H, IKBKG, RPL10, TAP1, POLR3G, DDX6, PAK2, RPL41, RPS8, RPS29, NLRP3, KRT7, P4HB, TFAP4, TOP2A, RPS12, RBL1, SIVA1, TMEM250, ISG15, TGFB1, DNAJC3, PSMB10, RPL21, PTBP1, RPL35A, SAMHD1, RPL37A, SEPT6, MAVS, RPLP2, IRF3, RPS27A, PACS2, CHMP7, …	ITGB1, XPR1, RPL39, TNPO1, CREB1, TAF5, PIK3R1, DYRK1A, SIN3A, MON1B, GPAM, ZMYND11, RPL15, BUB1, EIF2AK2, GTF2B, VRK2, STAT1, BNIP3L, LYN, VPS37A, DYNC1LI1, DDX21, SNX3, NUPL2, TRIM13, SUMO1, NPM1, VTA1, NUP35, PUM2, PDGFRA, NUP54, GTF2F2, CHMP2B, WWP1, KPNA3, UBE3A, PSMA4, DHX36, OAS3, AC068234.1, FAM111A, IVNS1ABP, MSH6, LMBRD1, FBXW7, RTRAF, NUP37, GTF2E1, NUP205, TPT1, RAB6A, IFIT5, VAPA, DD…
GO:0044764	multi-organism cellular process	701	31	15.46	269	0.00014	0.05617	0.0482759	1	Any process that is carried out at the cellular level which involves another organism of the same or different species	0.934297	-1.37583	CARD9, PKN2, POLR3K, CCNK, CDK9, RPSA, UBC, CREBZF, GFI1, RPL31, IFNGR2, BIN1, CHUK, SLC22A5, TAF4, CAMLG, RPS10, RPS21, RPS19, NOTCH1, TAP2, SCRIB, LDLR, TRIM5, SUPT6H, IKBKG, RPL10, TAP1, POLR3G, DDX6, PAK2, RPL41, RPS8, RPS29, NLRP3, KRT7, P4HB, TFAP4, TOP2A, RPS12, RBL1, SIVA1, TMEM250, ISG15, TGFB1, DNAJC3, PSMB10, RPL21, PTBP1, RPL35A, SAMHD1, RPL37A, SEPT6, MAVS, RPLP2, IRF3, RPS27A, PACS2…	ITGB1, XPR1, RPL39, TNPO1, CREB1, TAF5, PIK3R1, DYRK1A, SIN3A, MON1B, GPAM, ZMYND11, RPL15, BUB1, EIF2AK2, GTF2B, VRK2, STAT1, BNIP3L, LYN, VPS37A, DYNC1LI1, DDX21, SNX3, NUPL2, TRIM13, SUMO1, NPM1, VTA1, NUP35, PUM2, PDGFRA, NUP54, GTF2F2, CHMP2B, WWP1, KPNA3, UBE3A, PSMA4, DHX36, OAS3, AC068234.1, FAM111A, IVNS1ABP, MSH6, LMBRD1, FBXW7, RTRAF, NUP37, GTF2E1, NUP205, TPT1, RAB6A, IFIT5, VAPA, DD…
GO:0000028	ribosomal small subunit assembly	13	4	0.29	5	0.00014	0.00014	0.0482759	0.266667	The aggregation, arrangement and bonding together of constituent RNAs and proteins to form the small ribosomal subunit	0.390674	0.0911732	RPSA, RPS10, RPS19, RPS27L, RPS28
GO:0044403	symbiosis, encompassing mutualism throug...	717	31	15.82	358	0.00021	0.06983	0.07	1	An interaction between two organisms living together in more or less intimate association. The term host is usually used for the larger (macro) of the two members of a symbiosis. The smaller (micro) member is called the symbiont organism. Microscopic symbionts are often referred to as endosymbionts. The various forms of symbiosis include parasitism, in which the association is disadvantageous or …	0.934297	-1.37583	CARD9, PKN2, POLR3K, CCNK, CDK9, RPSA, UBC, CREBZF, GFI1, RPL31, IFNGR2, BIN1, CHUK, SLC22A5, TAF4, CAMLG, RPS10, RPS21, RPS19, NOTCH1, TAP2, CBL, SCRIB, LDLR, TRIM5, SUPT6H, IKBKG, RPL10, TAP1, POLR3G, DDX6, PAK2, RPL41, RPS8, RPS29, NLRP3, KRT7, P4HB, TFAP4, TOP2A, RPS12, RBL1, SIVA1, CDH1, TMEM250, ISG15, TGFB1, DNAJC3, PSMB10, RPL21, PTBP1, RPL35A, SAMHD1, RPL37A, SEPT6, MAVS, RPLP2, IRF3, RP…	ITGB1, XPR1, RPL39, TNPO1, CREB1, TAF5, PIK3R1, DYRK1A, SIN3A, MON1B, GPAM, ZMYND11, RPL15, BUB1, EIF2AK2, GTF2B, VRK2, STAT1, BNIP3L, LYN, VPS37A, DYNC1LI1, DDX21, SNX3, NUPL2, TRIM13, SUMO1, NPM1, VTA1, NUP35, PUM2, PDGFRA, NUP54, GTF2F2, CHMP2B, WWP1, KPNA3, UBE3A, PSMA4, DHX36, OAS3, AC068234.1, FAM111A, IVNS1ABP, TCP1, MSH6, LMBRD1, FBXW7, RTRAF, NUP37, GTF2E1, NUP205, TPT1, RAB6A, IFIT5, VA…
GO:0044419	interspecies interaction between organis...	719	31	15.86	370	0.00022	0.07168	0.0709677	1	Any process in which an organism has an effect on an organism of a different species	0.934297	-1.37583	CARD9, PKN2, POLR3K, CCNK, CDK9, RPSA, UBC, CREBZF, GFI1, RPL31, IFNGR2, BIN1, CHUK, SLC22A5, TAF4, CAMLG, RPS10, RPS21, RPS19, NOTCH1, TAP2, CBL, SCRIB, LDLR, MECP2, TRIM5, SUPT6H, IKBKG, RPL10, TAP1, POLR3G, DDX6, PAK2, RPL41, RPS8, RPS29, NLRP3, KRT7, P4HB, TFAP4, TOP2A, RPS12, RBL1, SIVA1, CDH1, TMEM250, ISG15, TGFB1, DNAJC3, PSMB10, RPL21, PTBP1, RPL35A, SAMHD1, RPL37A, SEPT6, MAVS, RPLP2, I…	ITGB1, XPR1, RPL39, TNPO1, CREB1, TAF5, PIK3R1, DYRK1A, SIN3A, MON1B, GPAM, ZMYND11, RPL15, BUB1, EIF2AK2, GTF2B, VRK2, STAT1, BNIP3L, LYN, VPS37A, DYNC1LI1, DDX21, SNX3, NUPL2, TRIM13, SUMO1, NPM1, VTA1, NUP35, PUM2, PDGFRA, NUP54, GTF2F2, CHMP2B, WWP1, KPNA3, UBE3A, PSMA4, DHX36, OAS3, AC068234.1, FAM111A, IVNS1ABP, TCP1, MSH6, LMBRD1, FBXW7, RTRAF, NUP37, GTF2E1, NUP205, TPT1, RAB6A, IFIT5, VA…
GO:0010629	negative regulation of gene expression	1108	42	24.44	266	0.00026	0.05447	0.08125	1	Any process that decreases the frequency, rate or extent of gene expression. Gene expression is the process in which a gene's coding sequence is converted into a mature gene product or products (proteins or RNA). This includes the production of an RNA transcript as well as any processing to produce a mature RNA product or an mRNA (for protein-coding genes) and the translation of that mRNA into pr…	1.14368	-1.57502	LRP8, ITGB8, KAT6A, KLF12, EXOSC6, SKIL, CNPY2, ATAD2B, MEX3D, H3F3A, KLF16, C1D, FZD8, HES6, PNPT1, ARHGAP35, CDK9, RPSA, HIST1H2AG, TSNAX, ZBTB18, TAF3, UBC, BAHD1, TAF9B, CREBZF, TBX2, GFI1, RPL31, GON4L, IGFBP5, IFI27, STRN3, PPM1F, HMG20A, SUFU, BRCA1, TNRC6B, RPS10, EGR1, SBNO2, AHR, SCMH1, RPS21, CBX6, NDFIP2, RPS19, DDX20, NOTCH1, RTF1, THRA, ATOH8, ZNF703, DAPK3, SMAD4, MDM4, LDLR, TNRC1…	FAM220A, ZNF675, HAT1, UBE2D3, THRB, RPL39, RNASEH2B, GSPT1, EPC1, RNF2, EIF3E, TENT2, PDCD10, WDR35, PAIP1, CREB1, DYRK1A, SIN3A, DIS3, ADNP, BAZ2A, ZBTB1, ZMYND11, GSPT2, RPL15, NFIL3, EIF2AK2, STAT1, ZNF224, IRF2, KDM5A, PTBP3, TMF1, AKIRIN2, GLIS3, ZNF567, EED, BTAF1, TMEM59, ZBTB33, COPS2, NUPL2, IREB2, TRIM13, SMURF2, SUMO1, UBA3, NCK1, IKZF4, RBAK, NUP35, PUM2, MBD2, TSN, NUP54, PRNP, NR2C…
GO:0071840	cellular component organization or bioge...	4047	113	89.27	54	0.00041	0.02181	0.124242	1	A process that results in the biosynthesis of constituent macromolecules, assembly, arrangement of constituent parts, or disassembly of a cellular component	1.52357	-1.91259	MIGA1, TUBB2A, PEX11A, FAM126A, NSUN5P2, LRP8, ITGB8, TRAPPC13, PHC1, KAT6A, IPO4, CERS2, EGLN2, PKN2, NUFIP1, EXOSC6, SKIL, RNF6, PSPN, ATAD2B, MZT1, FTCD, KIF14, VPS13C, TIE1, SNAP29, CCNK, EEF2K, ARHGAP18, GAS2L3, THSD4, PIK3C2B, H3F3A, VILL, SYTL3, GTF2H3, SSH2, C1D, TPGS1, PRKAR2B, PI4K2B, CDYL, SOD2, CLGN, C21orf2, PNPT1, ARHGAP35, MAK, NDUFA11, DYM, CDK9, DNAJC6, RPSA, HIST1H2AG, TIAM1, TL…	POT1, NEDD1, ITGB1, GEM, ATP2C1, CETN2, PSMD5, DNAJC28, POLE2, HAT1, UBE2D3, PPT1, SLU7, OMA1, TERF2IP, SRP19, MTBP, DVL3, MRPS30, RPL39, LYPLA1, MTREX, GSPT1, SUPT3H, EPC1, ACTR6, NOV, RNF2, NFE2L2, COL11A1, TNPO1, SEC31A, KIAA1109, PDCD10, CCNG1, RPF1, TLL1, RPGR, SMC6, WDR35, SLC9A6, YEATS4, TRAPPC6B, BRIX1, CREB1, TANC1, TAF5, ABCC4, PIK3R1, RHOQ, ARPC5, RABGAP1L, MPHOSPH10, SIN3A, DIS3, ADNP…
GO:0090150	establishment of protein localization to...	308	17	6.79	3153	0.00045	0.8275	0.12973	1	The directed movement of a protein to a specific location in a membrane	0.800422	-1.36312	FAM126A, RPSA, RPL31, RAB26, RPS10, RPS21, RPS19, SCRIB, RPL10, RAB8B, CDK5R1, RPL41, RPS8, RPS29, EFR3A, RPS12, CDH1, CDH2, TOMM7, RPL21, RPL35A, MIEF1, MPP5, RPL37A, PPP2R5A, PPP3R1, RPLP2, MIEF2, ARHGAP44, ATG4B, RPS27A, EZR, PACS2, RER1, RPL34, RDX, PKDCC, RPS23, CNST, TSPAN15, BCL2L1, KIF13A, PEX5, ARF6, UBL4A, ARFRP1, VAMP5, RAB3GAP1, RPS28, CSK	ITGB1, SRP19, RPL39, LYPLA1, PIK3R1, RHOQ, HSP90AA1, RPL15, YWHAZ, REEP1, TMEM59, PEX3, RAB11A, NUP54, PRNP, GOLPH3L, BLZF1, YWHAH, CALM2, SDCBP, VAMP3, GOLGA7, EGFR, MFF, RPL36A, MAPK8, SRP72, RAB10, SRP54, SRP14, HSPA4, RPL17-C18orf32, SRP9, ATG4A, RPL9, RPL17, MTCL1, C2CD5, RAB8A, PLS1, PKP2, TRAM1, CLASP2, ACSL3, TIMM9, SSR1, STOM, RAB31, DYNLL2, FYN, CLIP1
GO:0042255	ribosome assembly	46	6	1.01	790	0.00048	0.15946	0.12973	1	The aggregation, arrangement and bonding together of the mature ribosome and of its subunits	0.552769	-0.753921	RPSA, RPS10, RPS19, RPL10, DDX28, NOP53, RPS27L, RPS28	RPF1, BRIX1, EIF2A, NPM1, SBDS, MTERF3, FASTKD2
GO:0043604	amide biosynthetic process	586	26	12.93	1117	0.00048	0.23152	0.12973	1	The chemical reactions and pathways resulting in the formation of an amide, any derivative of an oxoacid in which an acidic hydroxy group has been replaced by an amino or substituted amino group	0.878405	-1.33289	CERS2, MEX3D, EEF2K, GTF2H3, RPSA, CYR61, RPL31, MTPN, IGFBP5, DEGS1, EIF2B1, TNRC6B, RPS10, MRPL54, RPS21, RPS19, NAGS, SECISBP2L, DAPK3, GGT7, LARP4, RPL10, UQCC2, PRKAA1, DDX6, GIGYF2, RPL41, RPS8, MRPS21, RPS29, ST3GAL5, RPS12, TGFB1, DNAJC3, RPL21, PTBP1, RPL35A, RPL37A, FOXO3, RPLP2, MTHFD2, RPS27A, ZNF598, SARS2, EIF1AX, SERP1, RPL22L1, RPL34, RPS23, ORMDL3, CHCHD1, NHP2, TNIP1, TARBP2, XR…	EIF3M, MRPS30, RPL39, GSPT1, NFE2L2, EIF3E, PAIP1, GSPT2, AASDH, RPL15, EIF2AK2, MRPL3, MRPL1, PPP1R15B, EIF2A, IARS, FAM129A, EEF1E1, IREB2, NPM1, NCK1, PUM2, ARG2, GCH1, EIF1B, C12orf65, EIF3J, RARS, DARS2, CAPRIN1, EIF3H, WARS2, EGFR, MTIF3, HNRNPR, RMND1, MRPS9, DDX5, RPL36A, TNRC6A, PRKRA, GARS, ALKBH1, MALSU1, YAE1D1, SSB, EIF4B, GGCT, FMR1, RC3H1, SPTSSA, DND1, RGS2, CNOT2, EIF4E, TARS, RP…
GO:0000461	endonucleolytic cleavage to generate mat...	2	2	0.04	7	0.00048	0.00048	0.12973	0.685714	Endonucleolytic cleavage at the 3'-end of the SSU-rRNA from an originally tricistronic rRNA transcript that contained the Small Subunit (SSU) rRNA, the 5.8S rRNA, and the Large Subunit (LSU) rRNA in that order from 5' to 3' along the primary transcript, to produce the mature end of the SSU-rRNA	0.779798	0.779798	RPSA, RPS21
GO:0016071	mRNA metabolic process	596	26	13.15	1366	0.00062	0.2881	0.163158	1	The chemical reactions and pathways involving mRNA, messenger RNA, which is responsible for carrying the coded genetic 'message', transcribed from DNA, to sites of protein assembly at the ribosomes	0.953939	-1.44764	EXOSC6, ZNF326, POLR3K, TRUB1, GTF2H3, CDC40, PPP4R2, PNPT1, CDK9, RPSA, RPL31, PRPF38B, TNRC6B, RPS10, WDR33, CCAR1, RPS21, RPS19, DDX20, RNPC3, SUPT6H, EDC3, ZHX2, RPL10, UBL5, DDX6, SUGP2, RPL41, RPS8, RPS29, ARL6IP4, C5AR1, RPS12, AQR, SNRPB2, LSM5, SREK1IP1, RPL21, PTBP1, RPL35A, SNRPB, THRAP3, RPL37A, HNRNPA1L2, RNH1, CMTR1, RPLP2, DHX8, SREBF1, CACTIN, TSEN54, RPS27A, GEMIN8, RPL34, RPS23,…	SLU7, CMTR2, RPL39, MTREX, GSPT1, RBM39, SLTM, BCAS2, RBMXL1, EIF3E, DHX15, TENT2, PAIP1, RBM17, DYRK1A, DIS3, RBM7, ZBTB1, GSPT2, RPL15, SYF2, PTBP3, TSEN15, MBNL1, PAPOLA, DHX40, GTF2F2, PPWD1, STRAP, RBM25, UPF2, PPIL3, RAVER2, MNAT1, DHX32, GTF2H1, PLRG1, CCNH, RSRC1, TTC37, PCF11, LSM1, HNRNPR, EXOSC3, DDX5, HIPK3, RPL36A, RNF20, ZMAT2, SRPK1, CWC22, ZCCHC8, PPP2R2A, ZC3HAV1, LGALS3, SSB, EI…
GO:0034470	ncRNA processing	351	18	7.74	3307	0.00073	0.91494	0.187179	1	Any process that results in the conversion of one or more primary non-coding RNA (ncRNA) transcripts into one or more mature ncRNA molecules	0.938097	-1.24774	NSUN5P2, EXOSC6, OSGEP, TRUB1, C1D, RPSA, POP1, RPL31, RPS10, RPS21, NSUN5P1, RPS19, LAGE3, DHX37, RPL10, RPL41, RPS8, RPS29, CTU1, RPS12, NPM3, NSUN5, RPL21, RPL35A, RRNAD1, RPL37A, FCF1, INTS2, RPLP2, TSEN54, RPS27A, UTP11, GTPBP3, RPL34, TRMT10A, RPS23, NHP2, TARBP2, BOP1, NSUN6, DDX49, EXOSC7, RPS28	RPL39, MTREX, RPF1, INTS8, MPHOSPH10, DIS3, UTP3, INTS6, RPL15, INTS7, TSEN15, WDR75, MRPL1, DDX21, ALKBH8, NOP58, PUS7L, SBDS, HEATR1, RRP15, RTRAF, EXOSC3, LCMT2, THUMPD1, MRPS9, RPL36A, DUS4L, TRMT61B, PRKRA, TRMT11, ALKBH1, SSB, BMT2, MAK16, INTS12, UTP4, NOL11, UTP15, OSGEPL1, FRG1, RPL17-C18orf32, RPL9, MTFMT, SMAD2, RPL17, IMP4, MTO1, PUS7, LTV1, EXOSC9, KIAA0391, PUS3, METTL2B, PNO1, MPHO…
GO:0072657	protein localization to membrane	389	19	8.58	2929	0.00094	0.73959	0.235	1	A process in which a protein is transported to, or maintained in, a specific location in a membrane	0.87357	-1.36854	FAM126A, RPSA, TIAM1, LIN7C, TUB, RPL31, RAB26, PRKCE, AP3D1, RPS10, RPS21, RPS19, CRIPT, MYO5A, SCRIB, RPL10, RAB8B, CDK5R1, RPL41, RPS8, RPS29, EFR3A, RPS12, CDH1, CDH2, TGFB1, TOMM7, IFT122, RAMP1, RPL21, RPL35A, MIEF1, PIGW, MPP5, RPL37A, PPP2R5A, PPP3R1, RPLP2, MIEF2, ARHGAP44, ATG4B, RPS27A, EZR, PACS2, DENND4C, RER1, RPL34, RDX, PKDCC, RPS23, CNST, TSPAN15, BCL2L1, KIF13A, PEX5, SSNA1, ARF…	ITGB1, SRP19, RPL39, LYPLA1, PIK3R1, RHOQ, CPE, HSP90AA1, RPL15, YWHAZ, REEP1, TMEM59, PEX3, RAB11A, NUP54, PRNP, GOLPH3L, BLZF1, EPB41L3, YWHAH, CALM2, SDCBP, BBIP1, VAMP3, GOLGA7, EGFR, MFF, RPL36A, MAPK8, SRP72, FGF13, RAB10, SRP54, SH3GLB1, SRP14, HSPA4, RAPGEF2, RPL17-C18orf32, SRP9, ATG4A, RPL9, RPL17, MTCL1, C2CD5, FNTA, RAB8A, PLS1, PKP2, TRAM1, CLASP2, EMP2, PDZD11, ACSL3, TIMM9, SSR1, S…
GO:1901566	organonitrogen compound biosynthetic pro...	967	36	21.33	1938	0.00109	0.4317	0.265854	1	The chemical reactions and pathways resulting in the formation of organonitrogen compound	0.919212	-1.50142	CERS2, GPC2, MEX3D, EEF2K, GTF2H3, RPSA, PXYLP1, MC1R, PSPH, CYR61, RPL31, MTPN, IGFBP5, DEGS1, EIF2B1, ADSS, TNRC6B, MRAP, RPS10, PDXK, MRPL54, ST3GAL2, RPS21, CSGALNACT2, RPS19, NME3, UMPS, NAGS, RFK, SECISBP2L, TSPO, DAPK3, PDCL, GGT7, LARP4, RPL10, UQCC2, PRKAA1, SPHK1, DDX6, GIGYF2, RPL41, RPS8, CSNK1G2, MRPS21, RPS29, ST3GAL5, IMPDH1, RPS12, FLCN, CSPG4, TGFB1, DNAJC3, RAMP1, RPL21, PTBP1, …	EXTL2, PPCS, ATP5F1EP2, EIF3M, MRPS30, RPL39, GSPT1, LINC02210-CRHR1, NFE2L2, EIF3E, PAIP1, AZIN1, PRKD3, ADNP, GSPT2, AASDH, RPL15, EIF2AK2, MRPL3, CSNK2A2, MRPL1, LUM, PPP1R15B, EIF2A, IARS, FAM129A, EEF1E1, IREB2, NPM1, NCK1, PUM2, NAMPT, ARG2, GCH1, EIF1B, C12orf65, EIF3J, HS2ST1, PANK1, RARS, SLC35B3, ESD, CALM2, DARS2, CAPRIN1, EIF3H, WARS2, EGFR, MTIF3, ATP5F1C, HNRNPR, RMND1, MOCS2, LCMT2…
GO:0031125	rRNA 3'-end processing	10	3	0.22	800	0.00113	0.162	0.269048	1	Any process involved in forming the mature 3' end of an rRNA molecule	0.205085	0.205085	EXOSC6, RPSA, RPS21	EXOSC3
GO:0006412	translation	526	23	11.6	1978	0.00126	0.44084	0.293023	1	The cellular metabolic process in which a protein is formed, using the sequence of a mature mRNA molecule to specify the sequence of amino acids in a polypeptide chain. Translation is mediated by the ribosome, and begins with the formation of a ternary complex between aminoacylated initiator methionine tRNA, GTP, and initiation factor 2, which subsequently associates with the small subunit of the…	0.828242	-1.30229	MEX3D, EEF2K, GTF2H3, RPSA, RPL31, MTPN, IGFBP5, EIF2B1, TNRC6B, RPS10, MRPL54, RPS21, RPS19, SECISBP2L, DAPK3, LARP4, RPL10, UQCC2, DDX6, GIGYF2, RPL41, RPS8, MRPS21, RPS29, RPS12, TGFB1, DNAJC3, RPL21, PTBP1, RPL35A, RPL37A, FOXO3, RPLP2, RPS27A, ZNF598, SARS2, EIF1AX, SERP1, RPL22L1, RPL34, RPS23, CHCHD1, NHP2, TNIP1, TARBP2, XRN1, PTRH1, MAP2K1, ABTB1, MRPL23, EIF2AK4, RPS27L, AURKAIP1, MRPL4…	EIF3M, MRPS30, RPL39, GSPT1, EIF3E, PAIP1, GSPT2, RPL15, EIF2AK2, MRPL3, MRPL1, PPP1R15B, EIF2A, IARS, FAM129A, EEF1E1, IREB2, NPM1, NCK1, PUM2, EIF1B, C12orf65, EIF3J, RARS, DARS2, CAPRIN1, EIF3H, WARS2, EGFR, MTIF3, HNRNPR, RMND1, MRPS9, DDX5, RPL36A, TNRC6A, PRKRA, GARS, ALKBH1, MALSU1, YAE1D1, SSB, EIF4B, FMR1, RC3H1, DND1, RGS2, CNOT2, EIF4E, TARS, RPS6KB1, ABCE1, AC079447.1, MRPS27, MRPL39,…
GO:0009987	cellular process	8354	194	184.28	30	0.00157	0.01259	0.356818	1	Any process that is carried out at the cellular level, but not necessarily restricted to a single cell. For example, cell communication occurs among more than one cell, but occurs at the cellular level	2.02716	-2.05988	SLC4A7, SPNS2, TMX1, MIGA1, TMEM38A, TUBB2A, PEX11A, FAM126A, ADAMTS1, NSUN5P2, AKAP10, ETNK1, ACAD11, LRP8, AL928654.3, KLF6, ITGB8, TRAPPC13, PHC1, CARD9, ZNF554, ACOT2, UNKL, PSMA6, KAT6A, CDK17, FGFR3, SKP2, IPO4, CERS2, FOSL2, TSPAN9, KLF12, EGLN2, NHLRC2, PKN2, INPP4B, IPPK, NUFIP1, EXOSC6, SKIL, HES4, LRRC40, ZNF326, RNF6, CNPY2, PSPN, ATAD2B, POLR3K, ZNF623, MZT1, FTCD, GTF2A1, KIF14, VPS…	POT1, NEDD1, ITGB1, ZNF83, ZFP69B, ZNF749, GEM, FAM220A, ZNF711, ZNF17, ATP2C1, ZNF138, CETN2, PSMD5, ZNF605, DNAJC28, ZNF441, EXTL2, ZNF675, NT5DC4, PIN4, POLE2, ZNF181, HAT1, ZNF480, ELOVL7, UBE2D3, EXOC5, PPT1, SLU7, CMTR2, PPCS, OMA1, ASB3, ARRDC3, ATP5F1EP2, THRB, TERF2IP, SRP19, CD58, SLC30A4, EIF3M, XPR1, MTBP, DVL3, MRPS30, RPL39, LYPLA1, PLPP5, RNASEH2B, MTREX, GSPT1, ZNF75A, YPEL5, MMAD…
GO:0043043	peptide biosynthetic process	540	23	11.91	2124	0.00178	0.4851	0.395556	1	The chemical reactions and pathways resulting in the formation of peptides, compounds of 2 or more (but usually less than 100) amino acids where the alpha carboxyl group of one is bound to the alpha amino group of another. This may include the translation of a precursor protein and its subsequent processing into a functional peptide	0.828242	-1.33289	MEX3D, EEF2K, GTF2H3, RPSA, RPL31, MTPN, IGFBP5, EIF2B1, TNRC6B, RPS10, MRPL54, RPS21, RPS19, SECISBP2L, DAPK3, GGT7, LARP4, RPL10, UQCC2, DDX6, GIGYF2, RPL41, RPS8, MRPS21, RPS29, RPS12, TGFB1, DNAJC3, RPL21, PTBP1, RPL35A, RPL37A, FOXO3, RPLP2, RPS27A, ZNF598, SARS2, EIF1AX, SERP1, RPL22L1, RPL34, RPS23, CHCHD1, NHP2, TNIP1, TARBP2, XRN1, PTRH1, MAP2K1, CHAC1, ABTB1, GCLM, MRPL23, EIF2AK4, RPS2…	EIF3M, MRPS30, RPL39, GSPT1, NFE2L2, EIF3E, PAIP1, GSPT2, AASDH, RPL15, EIF2AK2, MRPL3, MRPL1, PPP1R15B, EIF2A, IARS, FAM129A, EEF1E1, IREB2, NPM1, NCK1, PUM2, EIF1B, C12orf65, EIF3J, RARS, DARS2, CAPRIN1, EIF3H, WARS2, EGFR, MTIF3, HNRNPR, RMND1, MRPS9, DDX5, RPL36A, TNRC6A, PRKRA, GARS, ALKBH1, MALSU1, YAE1D1, SSB, EIF4B, GGCT, FMR1, RC3H1, DND1, RGS2, CNOT2, EIF4E, TARS, RPS6KB1, ABCE1, AC0794…
GO:0042274	ribosomal small subunit biogenesis	60	6	1.32	2602	0.00199	0.63359	0.432609	1	A cellular process that results in the biosynthesis of constituent macromolecules, assembly, and arrangement of constituent parts of a small ribosomal subunit; includes transport to the sites of protein synthesis	0.57524	-0.68158	RPSA, RPS10, RPS21, RPS19, RPS8, FCF1, UTP11, RPS27L, RPS28	MPHOSPH10, UTP3, HEATR1, MRPS9, UTP4, NOL11, LTV1, DCAF13
GO:0051179	localization	3453	96	76.17	685	0.00236	0.13595	0.502128	1	Any process in which a cell, a substance, or a cellular entity, such as a protein complex or organelle, is transported to or maintained in a specific location	1.72011	-1.89218	SLC4A7, SPNS2, TMEM38A, FAM126A, AKAP10, LRP8, PSMA6, SLC25A30, IPO4, CERS2, NHLRC2, PKN2, MZT1, KIF14, VPS13C, TIE1, SOCS7, MEX3D, SNAP29, EEF2K, ARHGAP18, TAX1BP3, SYTL3, SLC25A32, CDC40, TPGS1, SOD2, PNPT1, ARHGAP35, MAK, PBLD, MCOLN2, DNAJC6, TOM1, RPSA, SLC17A5, UQCRHL, TIAM1, TLN2, TSNAX, TRPV2, ACBD5, TAF3, UBC, LIN7C, TUB, SLC9B1, PREX1, SPIRE2, GJC2, CYR61, CDC42BPB, ADAM9, RPL31, OSBPL6…	POT1, NEDD1, ITGB1, GEM, ATP2C1, PSMD5, DNAJC28, TMEM184C, UBE2D3, EXOC5, PPT1, SLU7, ATP5F1EP2, TERF2IP, SRP19, CD58, SLC30A4, XPR1, MTBP, DVL3, RPL39, LYPLA1, YPEL5, LINC02210-CRHR1, PDGFD, NOV, NFE2L2, TNPO1, SEC31A, PSMD12, PDCD10, RPGR, SCAMP1, SNX13, WDR35, SLC9A6, CEP55, COG5, TRAPPC6B, CREB1, ABCC4, PIK3R1, AZIN1, HPSE, RHOQ, ARPC5, RABGAP1L, TMEM167A, SIN3A, KIAA0586, MON1B, CENPQ, CPE, …
GO:0051641	cellular localization	1787	56	39.42	878	0.00265	0.17536	0.552083	1	A localization process that takes place at the cellular level; as a result of a cellular localization process, a substance or cellular entity, such as a protein complex or organelle, is transported to, and/or maintained in, a specific location within or in the membrane of a cell	1.06954	-1.81878	FAM126A, IPO4, MZT1, KIF14, VPS13C, MEX3D, SNAP29, TAX1BP3, SYTL3, CDC40, TPGS1, MAK, PBLD, DNAJC6, TOM1, RPSA, TIAM1, TLN2, TAF3, UBC, LIN7C, TUB, SPIRE2, RPL31, RAB26, LAMTOR4, BIN1, CLUH, PRKCE, IFI27, HOOK3, AP3D1, SUFU, CCNE2, MRAP, PPFIA3, RPS10, WDR33, STX16, DCTN5, ZNF593, AKAP13, SNX8, RPS21, TBC1D14, NRAS, TAF8, RPS19, DDX20, KPNA6, WRAP53, CRIPT, BORCS6, SYT11, GGA2, SAR1B, MYO5A, ARFI…	POT1, NEDD1, ITGB1, GEM, UBE2D3, PPT1, SLU7, TERF2IP, SRP19, MTBP, DVL3, RPL39, LYPLA1, NOV, TNPO1, SEC31A, PDCD10, RPGR, SNX13, WDR35, COG5, TRAPPC6B, PIK3R1, RHOQ, RABGAP1L, TMEM167A, SIN3A, CENPQ, CPE, PFN2, FMN2, HSP90AA1, RPL15, YWHAZ, REEP1, DCTN4, BNIP3L, DST, DNM1L, LYN, IFT74, SNX2, NUSAP1, VPS37A, CSNK2A2, KDELR3, TMEM59, VPS36, DYNC1LI1, PEX3, RTN4, WDR75, TOMM20, ERO1A, SNX3, NPEPPS, …
GO:0018401	peptidyl-proline hydroxylation to 4-hydr...	4	2	0.09	8	0.00282	0.00282	0.552941	1	The modification of peptidyl-proline to form 4-hydroxy-L-proline; catalyzed by procollagen-proline,2-oxoglutarate-4-dioxygenase	0.300199	0.300199	EGLN2, P4HB	EGLN1
GO:0021859	pyramidal neuron differentiation	4	2	0.09	3396	0.00282	1	0.552941	1	The process in which a neuroblast or one of its progeny commits to a pyramidal neuron fate, migrates from the ventricular zone to the appropriate layer in the cortex and develops into a mature neuron	0.264786	0.264786	UQCRQ, DCLK2, OGDH
GO:0021860	pyramidal neuron development	4	2	0.09	9	0.00282	0.00282	0.552941	1	The progression of a pyramidal neuron from its initial formation to its mature state	0.264786	0.264786	UQCRQ, DCLK2, OGDH
GO:0009057	macromolecule catabolic process	918	33	20.25	2857	0.00318	0.71886	0.598182	1	The chemical reactions and pathways resulting in the breakdown of a macromolecule, any molecule of high relative molecular mass, the structure of which essentially comprises the multiple repetition of units derived, actually or conceptually, from molecules of low relative molecular mass	1.04248	-1.53982	PSMA6, SKP2, EGLN2, EXOSC6, RNF6, KIF14, GPC2, PPP1R3D, PNPT1, RPSA, ANAPC7, UBC, POP1, ADAM9, RPL31, SOCS4, SUFU, TNRC6B, RPS10, PTPN3, UBXN2A, RPS21, RNF166, RPS19, PYGB, UFL1, ANAPC2, CBL, MDM4, LDLR, POMT2, FBXL19, EDC3, ZHX2, RPL10, UQCC2, DNA2, ANAPC11, LNPEP, DDX6, RPL41, RPS8, RPS29, TRPC4AP, RNF11, RPS12, FBXO31, EDEM1, GSK3B, CTSV, ISG15, CSPG4, TGFB1, DNAJC3, CCDC22, LSM5, USP3, PSMB10…	PSMD5, UBE2D3, PPT1, OMA1, RPL39, LYPLA1, RNASEH2B, MTREX, GSPT1, UCHL5, NFE2L2, EIF3E, PSMD12, USP25, TENT2, USP38, PAIP1, AZIN1, HPSE, DIS3, GSPT2, FMN2, HSP90AA1, RPL15, BNIP3L, TMTC3, USP14, UBE2N, TMF1, TATDN1, VPS37A, RFFL, HMMR, VPS36, PSMA1, USP9Y, ANAPC10, LUM, SNX3, ZMPSTE24, TRIM13, SMURF2, SUMO1, LYPLAL1, TAF9, PSMC6, TOPORS, CRBN, WWP1, CDC23, PPP2R5C, UBE3A, UPF2, PSMA4, CALM2, OPHN…
GO:0030490	maturation of SSU-rRNA	46	5	1.01	361	0.00327	0.07077	0.598182	1	Any process involved in the maturation of a precursor Small SubUnit (SSU) ribosomal RNA (rRNA) molecule into a mature SSU-rRNA molecule	0.519776	-0.650387	RPSA, RPS21, RPS19, RPS8, FCF1, RPS28	MPHOSPH10, UTP3, HEATR1, MRPS9, UTP4, NOL11, DCAF13
GO:0010605	negative regulation of macromolecule met...	1605	51	35.4	671	0.00327	0.1318	0.598182	1	Any process that decreases the frequency, rate or extent of the chemical reactions and pathways involving macromolecules, any molecule of high relative molecular mass, the structure of which essentially comprises the multiple repetition of units derived, actually or conceptually, from molecules of low relative molecular mass	1.17043	-1.71432	LRP8, ITGB8, PSMA6, KAT6A, KLF12, EXOSC6, SKIL, CNPY2, ATAD2B, SOCS7, MEX3D, H3F3A, SH3RF1, NPAT, KLF16, TOB2, C1D, FZD8, PRKAR2B, CDYL, HES6, PNPT1, ARHGAP35, PBLD, CDK9, RPSA, HIST1H2AG, TSNAX, PRKAR1B, ZBTB18, ANAPC7, TAF3, UBC, BAHD1, TAF9B, CREBZF, PREX1, TBX2, GFI1, RPL31, WFDC3, BIRC6, GON4L, IGFBP5, RASSF2, PRKCE, IFI27, STRN3, SOCS4, PPM1F, HMG20A, SUFU, BRCA1, TNRC6B, RPS10, PPP1R1C, CC…	POT1, FAM220A, PSMD5, ZNF675, HAT1, UBE2D3, THRB, TERF2IP, RPL39, RNASEH2B, GSPT1, EPC1, RNF2, UCHL5, EIF3E, PSMD12, USP25, TENT2, PDCD10, WDR35, PAIP1, CREB1, AZIN1, DYRK1A, SIN3A, DIS3, ADNP, BAZ2A, ITM2B, ZBTB1, ZMYND11, GSPT2, FMN2, RPL15, NFIL3, EIF2AK2, STAT1, ZNF224, USP14, IRF2, KDM5A, PTBP3, TMF1, LYN, AKIRIN2, GLIS3, ZNF567, EED, RFFL, BTAF1, TMEM59, CAMK2N1, PSMA1, ZBTB33, ANAPC10, COP…
GO:0043603	cellular amide metabolic process	705	27	15.55	1886	0.00329	0.41828	0.598182	1	The chemical reactions and pathways involving an amide, any derivative of an oxoacid in which an acidic hydroxy group has been replaced by an amino or substituted amino group, as carried out by individual cells	0.988471	-1.3597	ITGB8, CERS2, FTCD, MEX3D, EEF2K, GTF2H3, SLC25A32, RPSA, MTHFR, CYR61, RPL31, MTPN, IGFBP5, DEGS1, EIF2B1, TNRC6B, RPS10, MRPL54, RPS21, SLC19A1, RPS19, NAGS, SECISBP2L, DAPK3, GGT7, LARP4, RPL10, UQCC2, PRKAA1, LNPEP, SLC46A1, DDX6, GIGYF2, RPL41, RPS8, MRPS21, RPS29, ST3GAL5, RPS12, TGFB1, DNAJC3, RPL21, PTBP1, RPL35A, RPL37A, FOXO3, BTD, RPLP2, MTHFD2, STAT5B, RPS27A, ZNF598, SARS2, EIF1AX, S…	EIF3M, MRPS30, RPL39, GSPT1, CPD, NFE2L2, EIF3E, PAIP1, CPE, GSPT2, HSP90AA1, AASDH, RPL15, EIF2AK2, CPA3, MRPL3, MRPL1, PPP1R15B, EIF2A, NPEPPS, IARS, FAM129A, EEF1E1, IREB2, NPM1, NCK1, PUM2, ARG2, GCH1, EIF1B, C12orf65, EIF3J, RARS, ATP6AP2, DARS2, CAPRIN1, EIF3H, ALDH5A1, WARS2, EGFR, MTIF3, HNRNPR, RMND1, MCCC2, MRPS9, DDX5, RPL36A, TNRC6A, PRKRA, GARS, ALKBH1, PROS1, LAMP2, MALSU1, YAE1D1, …
GO:0008283	cell proliferation	1071	37	23.62	10	0.00347	0.00347	0.612281	1	The multiplication or reproduction of cells, resulting in the expansion of a cell population	1.15599	-1.42058	ADAMTS1, AL928654.3, FGFR3, SKP2, CERS2, FOSL2, KIF14, SSTR1, H3F3A, TAX1BP3, TOB2, SOD2, PBLD, CDK9, TIAM1, TBX2, CYR61, IGFBP7, BIRC6, IGFBP5, BIN1, RPA3, HOOK3, BRCA1, PDXK, CCAR1, EGR1, AHR, HMGN5, CDCA7L, TAF8, KISS1, PLXNB1, DDX20, GINS1, NOTCH1, SLC35F6, UFL1, FIGNL1, KITLG, ATOH8, TSPO, RC3H2, ZNF703, PRG4, SMAD4, MDM4, SCRIB, MECP2, KRAS, MAGED1, COPS9, PRKAA1, SPHK1, ROMO1, FAM129B, FOX…	ITGB1, MTBP, RNASEH2B, PDGFD, NOV, NRK, PDCD10, GDF11, CREB1, ABCC4, HPSE, MARCH7, GPAM, ZMYND11, BUB1, EIF2AK2, PCNA, SYF2, STAT1, LIPA, GNG5, IRF2, LYN, IFT74, AKIRIN2, NAP1L1, RTN4, COPS2, KRIT1, USPL1, RASGRF1, EEF1E1, NPM1, NCK1, NAMPT, MBD2, TNFRSF11B, PDGFRA, PRNP, PSMG1, TOPORS, SBDS, C18orf54, PAK1IP1, MCC, PPP2R5C, CIP2A, BLZF1, STRAP, MNAT1, SDCBP, AC068234.1, C3orf58, NKX3-1, MAP3K20,…
GO:0034622	cellular macromolecular complex assembly	708	27	15.62	776	0.00349	0.15263	0.612281	1	The aggregation, arrangement and bonding together of a set of macromolecules to form a complex, carried out at the cellular level	1.02274	-1.51107	KAT6A, IPO4, NUFIP1, MZT1, SNAP29, ARHGAP18, H3F3A, VILL, GTF2H3, NDUFA11, RPSA, UBC, TAF9B, PREX1, SPIRE2, MTPN, BIN1, FCHSD2, RPA3, COBLL1, TAF4, PRKCE, WASF3, HIST1H2BJ, RPS10, NDUFA2, PET100, MYOM2, RPS19, DDX20, ARPC1B, NDUFB2, SLAIN2, ARFIP1, THRA, ARMC4, SMAD4, MECP2, EDC3, RPL10, UQCC2, H1FX, DDX6, KAT6B, NLRP3, NDUFA9, COX14, CTTN, BRF1, DDX28, TGFB1, SNAP23, TSPYL4, NDUFB6, MAPT, MCM2, …	CETN2, PSMD5, DNAJC28, HAT1, SLU7, SRP19, RPF1, BRIX1, CREB1, ARPC5, ITGB3BP, CENPQ, PFN2, HSP90AA1, UQCRB, EIF2AK2, GTF2B, PTGES3, DNM1L, NAP1L1, RASA1, RTN4, TOMM20, EIF2A, NPM1, NCK1, PUM2, TAF9, MBD2, PSMC6, PSMG1, SBDS, ATPAF1, NDUFS1, CAPZA1, TMOD1, STRAP, CAPZA2, MNAT1, SEC24B, CENPI, GTF2H1, AP003108.2, CCNH, PSMG2, TCP1, VAMP3, MTERF3, NUP205, EXOC8, SENP6, DNAAF5, SRPK1, SET, RAB1A, NDU…
GO:0006119	oxidative phosphorylation	90	7	1.99	11	0.00364	0.00364	0.627119	1	The phosphorylation of ADP to ATP that accompanies the oxidation of a metabolite through the operation of the respiratory chain. Oxidation of compounds establishes a proton gradient across the membrane, providing the energy for ATP synthesis	0.653625	-0.725681	NDUFA11, UQCRHL, NDUFA2, NDUFB2, MECP2, UQCC2, NDUFA9, UQCRQ, NDUFB6, COX10, CDK1, TAZ, SURF1	UQCRB, MSH2, NDUFS1, AP003108.2, ATP5F1C, PMPCB, NDUFA12, NDUFB1, SDHD, NDUFA6, DLD
GO:0033365	protein localization to organelle	711	27	15.68	2861	0.0037	0.72045	0.627119	1	A process in which a protein is transported to, or maintained in, a location within an organelle	0.830509	-1.6195	IPO4, PBLD, RPSA, TAF3, TUB, RPL31, LAMTOR4, HOOK3, AP3D1, SUFU, RPS10, RPS21, NRAS, TAF8, RPS19, KPNA6, WRAP53, CRIPT, SYT11, TNPO2, DNAJC19, THRA, TOMM5, TSPO, SMAD4, SCRIB, DNLZ, RPL10, KIAA0753, TOMM40L, SPHK1, SZT2, AKR1C3, CROCC, RAB8B, UBL5, RPL41, RPS8, ESCO2, RPS29, NLRP3, PACSIN2, NFKBIE, TSPAN17, RPS12, VTI1A, FLCN, CDH1, LEPROT, GSK3B, TGFB1, TOMM7, CCDC22, IFT122, MAPT, RPL21, KLHL21…	POT1, NEDD1, UBE2D3, TERF2IP, SRP19, MTBP, RPL39, NOV, TNPO1, WDR35, PIK3R1, SIN3A, CENPQ, HSP90AA1, RPL15, YWHAZ, BNIP3L, DNM1L, CSNK2A2, KDELR3, VPS36, PEX3, RTN4, WDR75, TOMM20, NPEPPS, SUMO1, NCOA4, NUP35, RAB11A, NUP54, AP3B1, TOPORS, AP3M1, KPNA3, HSPH1, PEX12, YWHAH, CALM2, HNMT, ZFAND6, PLRG1, BBIP1, PIBF1, DNAJA1, TCP1, FBXW7, CEP68, EGFR, TTK, MFF, SH3BP4, ZFYVE16, RAB6A, VAPA, RPL36A, …
GO:0008347	glial cell migration	30	4	0.66	12	0.00402	0.00402	0.67	1	The orderly movement of a glial cell, non-neuronal cells that provide support and nutrition, maintain homeostasis, form myelin, and participate in signal transmission in the nervous system	0.689371	-0.448588	CERS2, SOCS7, TIAM1, TSPO, SCRIB, SRGAP2, CDK5R1, CSPG4, SUN2	RTN4, MATN2, SYNE2, TGFB2
GO:0006665	sphingolipid metabolic process	93	7	2.05	1043	0.00437	0.21412	0.701515	1	The chemical reactions and pathways involving sphingolipids, any of a class of lipids containing the long-chain amine diol sphingosine or a closely related base (a sphingoid)	0.959712	-0.826699	SPNS2, ITGB8, CERS2, ARSI, CYR61, DEGS1, PRKAA1, SPHK1, CSNK1G2, ST3GAL5, A4GALT, ALDH3A2, ORMDL3, PSAP, NEU3, CLN6, DEGS2	PPT1, PRKD3, ARSK, ALDH5A1, VAPA, PLPP1, SERINC3, SPTSSA, CERKL, CTSA, HACD2, UGCG, AGK, SAMD8
GO:0070727	cellular macromolecule localization	1315	43	29.01	1629	0.0044	0.35941	0.701515	1	Any process in which a macromolecule is transported to, and/or maintained in, a specific location at the level of a cell. Localization at the cellular level encompasses movement within the cell, from within the cell to the cell surface, or from one location to another at the surface of a cell	1.02963	-1.75359	FAM126A, IPO4, MZT1, MEX3D, TAX1BP3, SYTL3, CDC40, MAK, PBLD, TOM1, RPSA, TIAM1, TLN2, TAF3, LIN7C, TUB, RPL31, RAB26, LAMTOR4, PRKCE, IFI27, HOOK3, AP3D1, SUFU, CCNE2, MRAP, RPS10, WDR33, STX16, ZNF593, SNX8, RPS21, TBC1D14, NRAS, TAF8, RPS19, KPNA6, WRAP53, CRIPT, SYT11, GGA2, SAR1B, MYO5A, ARFIP1, TNPO2, DNAJC19, THRA, TOMM5, TSPO, TAP2, RAB11FIP5, SMAD4, SCRIB, DNLZ, SUPT6H, STX18, RPL10, KIA…	POT1, NEDD1, ITGB1, UBE2D3, SLU7, TERF2IP, SRP19, MTBP, DVL3, RPL39, LYPLA1, NOV, TNPO1, RPGR, SNX13, WDR35, PIK3R1, RHOQ, RABGAP1L, SIN3A, CENPQ, CPE, HSP90AA1, RPL15, YWHAZ, REEP1, BNIP3L, DNM1L, IFT74, SNX2, CSNK2A2, KDELR3, TMEM59, VPS36, PEX3, RTN4, WDR75, TOMM20, NPEPPS, NUPL2, SUMO1, NPM1, NCOA4, NUP35, RAB11A, NUP54, PRNP, AP3B1, LEPROTL1, TOPORS, AP3M1, XPOT, KPNA3, HSPH1, GOLPH3L, BLZF1…
GO:0006886	intracellular protein transport	867	31	19.12	1951	0.00462	0.43727	0.701515	1	The directed movement of proteins in a cell, including the movement of proteins between specific compartments or structures within a cell, such as organelles of a eukaryotic cell	0.879088	-1.40336	IPO4, SYTL3, CDC40, MAK, PBLD, TOM1, RPSA, RPL31, IFI27, AP3D1, SUFU, RPS10, WDR33, STX16, ZNF593, SNX8, RPS21, TBC1D14, RPS19, KPNA6, GGA2, SAR1B, ARFIP1, TNPO2, DNAJC19, THRA, TOMM5, TSPO, TAP2, SMAD4, DNLZ, SUPT6H, STX18, RPL10, TOMM40L, SPHK1, TAP1, AKR1C3, RAB8B, STX6, UBL5, CDK5R1, RPL41, RPS8, RPS29, NLRP3, CTTN, NFKBIE, RANGAP1, RPS12, VTI1A, CDH1, LEPROT, EDEM1, GSK3B, TGFB1, TOMM7, CCDC…	UBE2D3, SLU7, SRP19, RPL39, NOV, TNPO1, RPGR, SNX13, WDR35, PIK3R1, RABGAP1L, HSP90AA1, RPL15, YWHAZ, BNIP3L, IFT74, SNX2, CSNK2A2, VPS36, PEX3, WDR75, TOMM20, NPEPPS, NUPL2, NPM1, NCOA4, NUP35, NUP54, PRNP, AP3B1, AP3M1, XPOT, KPNA3, PEX12, UPF2, YWHAH, SEC24B, HNMT, SDCBP, DNAJC27, ZFAND6, HSPB11, FBXW7, NUP37, GOLGA7, EGFR, NUP205, MFF, TBCK, ZFYVE16, RAB6A, ARCN1, RPL36A, SRP72, SDAD1, AP1S2,…
GO:0021548	pons development	5	2	0.11	13	0.00463	0.00463	0.701515	1	The process whose specific outcome is the progression of the pons over time, from its formation to the mature structure. The pons lies above the medulla and next to the cerebellum. The pons conveys information about movement from the cerebral hemisphere to the cerebellum	0.194443	0.194443	SCRIB, CDK5R1, UQCRQ	SEC24B
GO:0032274	gonadotropin secretion	5	2	0.11	14	0.00463	0.00463	0.701515	1	The regulated release of a gonadotropin, any hormone that stimulates the gonads, especially follicle-stimulating hormone and luteinizing hormone	0.265573	0.265573	KISS1, SMAD4, FAM129B, TBX3	TMF1
GO:1902946	protein localization to early endosome	5	2	0.11	15	0.00463	0.00463	0.701515	1	A process in which a protein is transported to, or maintained in, a location within an early endosome	0.199163	0.199163	SCRIB, EZR, RDX
GO:1990126	retrograde transport, endosome to plasma...	16	3	0.35	16	0.00479	0.00479	0.714925	1	The directed movement of membrane-bounded vesicles from endosomes back to the plasma membrane, a trafficking pathway that promotes the recycling of internalized transmembrane proteins	0.404773	-0.175889	ENTR1, SCRIB, VPS26A, SNX17, ARHGAP44, VPS39	RAB11A, VPS29, ANKRD27
GO:0000462	maturation of SSU-rRNA from tricistronic...	32	4	0.71	690	0.00509	0.13887	0.734286	1	Any process involved in the maturation of a precursor Small SubUnit (SSU) ribosomal RNA (rRNA) molecule into a mature SSU-rRNA molecule from the pre-rRNA molecule originally produced as a tricistronic rRNA transcript that contains the Small Subunit (SSU) rRNA, 5.8S rRNA, and the Large Subunit (LSU) in that order from 5' to 3' along the primary transcript	0.503622	-0.488896	RPSA, RPS21, RPS19, RPS8, FCF1	UTP3, HEATR1, MRPS9, DCAF13
GO:0046907	intracellular transport	1249	41	27.55	1328	0.00513	0.27982	0.734286	1	The directed movement of substances within a cell	0.941881	-1.41278	IPO4, VPS13C, SNAP29, SYTL3, CDC40, MAK, PBLD, DNAJC6, TOM1, RPSA, UBC, SPIRE2, RPL31, IFI27, HOOK3, AP3D1, SUFU, RPS10, WDR33, STX16, DCTN5, ZNF593, AKAP13, SNX8, RPS21, TBC1D14, RPS19, DDX20, KPNA6, SYT11, GGA2, SAR1B, MYO5A, ARFIP1, TNPO2, DNAJC19, THRA, BLOC1S4, TOMM5, TSPO, TAP2, SMAD4, CBL, SCRIB, LDLR, DNLZ, SUPT6H, HTT, STX18, RPL10, TOMM40L, SPHK1, TAP1, AKR1C3, FAM160A2, RAB8B, STX6, UB…	UBE2D3, SLU7, SRP19, RPL39, NOV, TNPO1, SEC31A, RPGR, SNX13, WDR35, COG5, TRAPPC6B, PIK3R1, RABGAP1L, TMEM167A, PFN2, FMN2, HSP90AA1, RPL15, YWHAZ, REEP1, DCTN4, BNIP3L, DST, DNM1L, LYN, IFT74, SNX2, VPS37A, CSNK2A2, VPS36, DYNC1LI1, PEX3, WDR75, TOMM20, SNX3, NPEPPS, NUPL2, NPM1, NCOA4, MON2, NUP35, TMEM230, RAB11A, NEMF, NUP54, PRNP, AP3B1, CHMP2B, AP3M1, XPOT, KPNA3, ARV1, PEX12, UPF2, YWHAH, …
GO:0044085	cellular component biogenesis	2003	60	44.18	1442	0.00514	0.31365	0.734286	1	A process that results in the biosynthesis of constituent macromolecules, assembly, and arrangement of constituent parts of a cellular component. Includes biosynthesis of constituent macromolecules, and those macromolecular modifications that are involved in synthesis or assembly of the cellular component	1.1994	-1.82864	PEX11A, NSUN5P2, KAT6A, IPO4, PKN2, NUFIP1, EXOSC6, MZT1, KIF14, SNAP29, EEF2K, ARHGAP18, THSD4, H3F3A, VILL, GTF2H3, SSH2, C1D, TPGS1, PRKAR2B, SOD2, CLGN, C21orf2, PNPT1, ARHGAP35, MAK, NDUFA11, RPSA, TLN2, UBC, BAHD1, TAF9B, PREX1, SPIRE2, REC8, KCTD7, CYR61, RPL31, CEP126, MTPN, LOX, BIN1, FCHSD2, RPA3, COBLL1, TAF4, PRKCE, PPM1F, NPHP1, WASF3, BRCA1, HIST1H2BJ, RPS10, NDUFA2, PET100, DCTPP1,…	POT1, NEDD1, ITGB1, CETN2, PSMD5, DNAJC28, HAT1, SLU7, SRP19, RPL39, MTREX, TNPO1, SEC31A, PDCD10, RPF1, RPGR, WDR35, TRAPPC6B, BRIX1, CREB1, ABCC4, PIK3R1, RHOQ, ARPC5, MPHOSPH10, DIS3, ADNP, ITGB3BP, UTP3, KIAA0586, CENPQ, PFN2, ZBTB1, FMN2, HSP90AA1, ABRAXAS2, RPL15, UQCRB, EIF2AK2, GTF2B, YWHAZ, PTGES3, MYLK, DNM1L, TMF1, IFT74, SNX2, NAP1L1, VPS37A, RASA1, LPXN, VPS36, PEX3, RTN4, WDR75, MRP…
GO:0051649	establishment of localization in cell	1406	45	31.01	1180	0.00528	0.24023	0.743662	1	The directed movement of a substance or cellular entity, such as a protein complex or organelle, to a specific location within, or in the membrane of, a cell	0.958092	-1.52685	IPO4, KIF14, VPS13C, SNAP29, SYTL3, CDC40, MAK, PBLD, DNAJC6, TOM1, RPSA, TIAM1, UBC, LIN7C, SPIRE2, RPL31, PRKCE, IFI27, HOOK3, AP3D1, SUFU, PPFIA3, RPS10, WDR33, STX16, DCTN5, ZNF593, AKAP13, SNX8, RPS21, TBC1D14, RPS19, DDX20, KPNA6, SYT11, GGA2, SAR1B, MYO5A, ARFIP1, TNPO2, DNAJC19, THRA, BLOC1S4, TOMM5, TSPO, TAP2, RAB11FIP5, SMAD4, CBL, SCRIB, LDLR, DNLZ, SUPT6H, IKBKG, HTT, STX18, RPL10, T…	GEM, UBE2D3, PPT1, SLU7, SRP19, RPL39, NOV, TNPO1, SEC31A, PDCD10, RPGR, SNX13, WDR35, COG5, TRAPPC6B, PIK3R1, RABGAP1L, TMEM167A, CENPQ, PFN2, FMN2, HSP90AA1, RPL15, YWHAZ, REEP1, DCTN4, BNIP3L, DST, DNM1L, LYN, IFT74, SNX2, NUSAP1, VPS37A, CSNK2A2, VPS36, DYNC1LI1, PEX3, WDR75, TOMM20, ERO1A, SNX3, NPEPPS, NUPL2, NPM1, NCOA4, MON2, NUP35, TMEM230, RAB11A, NEMF, NUP54, PRNP, AP3B1, CHMP2B, AP3M1…
GO:0009892	negative regulation of metabolic process	1726	53	38.07	797	0.00552	0.16113	0.766667	1	Any process that stops, prevents, or reduces the frequency, rate or extent of the chemical reactions and pathways within a cell or an organism	1.17043	-1.72501	LRP8, ITGB8, PSMA6, KAT6A, KLF12, EXOSC6, SKIL, CNPY2, ATAD2B, SOCS7, MEX3D, H3F3A, SH3RF1, NPAT, KLF16, TOB2, C1D, FZD8, PRKAR2B, CDYL, HES6, PNPT1, ARHGAP35, PBLD, CDK9, RPSA, HIST1H2AG, SH3RF2, TSNAX, PRKAR1B, ZBTB18, ANAPC7, TAF3, UBC, BAHD1, TAF9B, WDR81, CREBZF, PREX1, TBX2, GFI1, RPL31, WFDC3, BIRC6, GON4L, IGFBP5, RASSF2, PRKCE, IFI27, STRN3, SOCS4, PPM1F, HMG20A, SUFU, BRCA1, TNRC6B, RPS…	POT1, FAM220A, PSMD5, ZNF675, HAT1, UBE2D3, ARRDC3, THRB, TERF2IP, RPL39, RNASEH2B, GSPT1, EPC1, RNF2, UCHL5, EIF3E, PSMD12, USP25, TENT2, PDCD10, WDR35, PAIP1, CREB1, AZIN1, MPHOSPH10, DYRK1A, SIN3A, DIS3, ADNP, BAZ2A, ITM2B, ZBTB1, ZMYND11, GSPT2, FMN2, RPL15, NFIL3, EIF2AK2, STAT1, ZNF224, USP14, IRF2, KDM5A, PTBP3, TMF1, LYN, AKIRIN2, GLIS3, ZNF567, EED, RFFL, BTAF1, TMEM59, CAMK2N1, PSMA1, Z…
GO:0045933	positive regulation of muscle contractio...	17	3	0.38	17	0.00572	0.00572	0.783562	1	Any process that activates or increases the frequency, rate or extent of muscle contraction	0.353431	-0.110571	SPHK1, CTTN, GSTO1, ATP2A1	OXTR, RGS2
GO:0048519	negative regulation of biological proces...	2853	80	62.93	386	0.00595	0.08152	0.797368	1	Any process that stops, prevents, or reduces the frequency, rate or extent of a biological process. Biological processes are regulated by many means; examples include the control of gene expression, protein modification or interaction with a protein or substrate molecule	1.25262	-1.79969	ADAMTS1, LRP8, ITGB8, PSMA6, KAT6A, FGFR3, CERS2, KLF12, EXOSC6, SKIL, RNF6, CNPY2, ATAD2B, KIF14, VPS13C, TIE1, SOCS7, MEX3D, CCNK, EEF2K, SSTR1, H3F3A, TAX1BP3, SH3RF1, VILL, NPAT, KLF16, TOB2, C1D, FZD8, PRKAR2B, CDYL, SOD2, HES6, PNPT1, ARHGAP35, PIDD1, MAK, PBLD, CDK9, RPSA, HIST1H2AG, SH3RF2, TSNAX, PRKAR1B, ZBTB18, ANAPC7, TAF3, UBC, BAHD1, TAF9B, MC1R, WDR81, CREBZF, PREX1, TBX2, GFI1, CY…	POT1, ITGB1, FAM220A, PSMD5, ZNF675, HAT1, UBE2D3, PPT1, OMA1, ARRDC3, THRB, TERF2IP, MTBP, DVL3, RPL39, LYPLA1, RNASEH2B, GSPT1, EPC1, LINC02210-CRHR1, NOV, RNF2, UCHL5, NFE2L2, HIGD1A, EIF3E, NRK, PSMD12, USP25, TENT2, PDCD10, SNX13, WDR35, PAIP1, LRRC17, GDF11, CREB1, PIK3R1, AZIN1, RHOQ, MARCH7, MPHOSPH10, DYRK1A, SIN3A, DIS3, ADNP, BAZ2A, PTPN12, MAP2K4, ITM2B, PFN2, GPAM, ZBTB1, ZMYND11, GS…
GO:0030148	sphingolipid biosynthetic process	53	5	1.17	18	0.00604	0.00604	0.797368	1	The chemical reactions and pathways resulting in the formation of sphingolipids, any of a class of lipids containing the long-chain amine diol sphingosine or a closely related base (a sphingoid)	0.648939	-0.623218	CERS2, CYR61, DEGS1, PRKAA1, SPHK1, CSNK1G2, ST3GAL5, A4GALT, ALDH3A2, ORMDL3, DEGS2	PRKD3, VAPA, PLPP1, SPTSSA, CERKL, HACD2, UGCG, AGK, SAMD8
GO:0033036	macromolecule localization	1936	58	42.71	1175	0.00606	0.23734	0.797368	1	Any process in which a macromolecule is transported to, or maintained in, a specific location	1.26635	-1.77861	SPNS2, FAM126A, AKAP10, IPO4, MZT1, KIF14, MEX3D, SNAP29, TAX1BP3, SYTL3, CDC40, PNPT1, MAK, PBLD, TOM1, RPSA, TIAM1, TLN2, TSNAX, TAF3, LIN7C, TUB, SPIRE2, ADAM9, RPL31, OSBPL6, RAB26, NEURL1B, LAMTOR4, CHUK, LTBP1, PRKCE, IFI27, HOOK3, SLC27A4, AP3D1, SUFU, CCNE2, MRAP, RPS10, WDR33, STX16, ZNF593, SNX8, RPS21, TBC1D14, NRAS, TAF8, NDFIP2, OSBPL5, RPS19, KPNA6, WRAP53, DGKD, CRIPT, SYT11, GGA2,…	POT1, NEDD1, ITGB1, UBE2D3, EXOC5, PPT1, SLU7, TERF2IP, SRP19, CD58, MTBP, DVL3, RPL39, LYPLA1, LINC02210-CRHR1, NOV, TNPO1, SEC31A, RPGR, SCAMP1, SNX13, WDR35, CEP55, COG5, ABCC4, PIK3R1, RHOQ, RABGAP1L, TMEM167A, SIN3A, KIAA0586, CENPQ, CPE, GPAM, FMN2, HSP90AA1, RPL15, YWHAZ, REEP1, BNIP3L, DNM1L, TMF1, LYN, IFT74, SNX2, VPS37A, SNX14, CSNK2A2, KDELR3, TMEM59, VPS36, PEX3, GULP1, RTN4, WDR75, …
GO:0031145	anaphase-promoting complex-dependent cat...	76	6	1.68	19	0.00649	0.00649	0.834615	1	The chemical reactions and pathways resulting in the breakdown of a protein or peptide by hydrolysis of its peptide bonds, initiated by the covalent attachment of ubiquitin, with ubiquitin-protein ligation catalyzed by the anaphase-promoting complex, and mediated by the proteasome	0.735663	-0.942602	PSMA6, SKP2, ANAPC7, UBC, ANAPC2, ANAPC11, FBXO31, PSMB10, RPS27A, CDK1, PSMA7	PSMD5, PSMD12, PSMA1, ANAPC10, PSMC6, CDC23, PSMA4, PSMD14, CDC27, PSMD6, UBE2E1, PSMD7
GO:0034613	cellular protein localization	1305	42	28.79	1902	0.00651	0.42466	0.834615	1	Any process in which a protein is transported to, and/or maintained in, a specific location at the level of a cell. Localization at the cellular level encompasses movement within the cell, from within the cell to the cell surface, or from one location to another at the surface of a cell	1.01626	-1.75359	FAM126A, IPO4, MZT1, TAX1BP3, SYTL3, CDC40, MAK, PBLD, TOM1, RPSA, TIAM1, TLN2, TAF3, LIN7C, TUB, RPL31, RAB26, LAMTOR4, PRKCE, IFI27, HOOK3, AP3D1, SUFU, CCNE2, MRAP, RPS10, WDR33, STX16, ZNF593, SNX8, RPS21, TBC1D14, NRAS, TAF8, RPS19, KPNA6, WRAP53, CRIPT, SYT11, GGA2, SAR1B, MYO5A, ARFIP1, TNPO2, DNAJC19, THRA, TOMM5, TSPO, TAP2, RAB11FIP5, SMAD4, SCRIB, DNLZ, SUPT6H, STX18, RPL10, KIAA0753, …	POT1, NEDD1, ITGB1, UBE2D3, SLU7, TERF2IP, SRP19, MTBP, DVL3, RPL39, LYPLA1, NOV, TNPO1, RPGR, SNX13, WDR35, PIK3R1, RHOQ, RABGAP1L, SIN3A, CENPQ, CPE, HSP90AA1, RPL15, YWHAZ, REEP1, BNIP3L, DNM1L, IFT74, SNX2, CSNK2A2, KDELR3, TMEM59, VPS36, PEX3, RTN4, WDR75, TOMM20, NPEPPS, NUPL2, SUMO1, NPM1, NCOA4, NUP35, RAB11A, NUP54, PRNP, AP3B1, LEPROTL1, TOPORS, AP3M1, XPOT, KPNA3, HSPH1, GOLPH3L, BLZF1…
GO:0043628	ncRNA 3'-end processing	18	3	0.4	1388	0.00676	0.29786	0.845679	1	Any process involved in forming the mature 3' end of a non-coding RNA molecule	0.370439	-0.294564	EXOSC6, RPSA, RPS21	INTS7, EXOSC3, SSB
GO:0021794	thalamus development	6	2	0.13	20	0.00685	0.00685	0.845679	1	The process in which the thalamus changes over time, from its initial formation to its mature state	0.153024	0.153024	UQCRQ, OGDH	SRD5A1
GO:0030952	establishment or maintenance of cytoskel...	6	2	0.13	21	0.00685	0.00685	0.845679	1	Any cellular process that results in the specification, formation or maintenance of polarized cytoskeletal structures	0.294446	0.294446	ARHGAP35, LMNA
GO:0006396	RNA processing	782	28	17.25	2476	0.00698	0.58737	0.85122	1	Any process involved in the conversion of one or more primary RNA transcripts into one or more mature RNA molecules	1.04309	-1.42886	NSUN5P2, NUFIP1, EXOSC6, ZNF326, OSGEP, TRUB1, GTF2H3, CDC40, C1D, PPP4R2, PNPT1, CDK9, RPSA, POP1, RPL31, PRPF38B, RPS10, WDR33, CCAR1, RPS21, NSUN5P1, RPS19, DDX20, RNPC3, LAGE3, SUPT6H, DHX37, RPL10, UBL5, SUGP2, RPL41, RPS8, RPS29, ARL6IP4, CTU1, RPS12, AQR, TGFB1, NPM3, NSUN5, SNRPB2, LSM5, SREK1IP1, RPL21, PTBP1, RPL35A, SNRPB, DDX19A, THRAP3, RRNAD1, RPL37A, HNRNPA1L2, FCF1, CMTR1, INTS2, …	SLU7, CMTR2, RPL39, MTREX, RBM39, SLTM, BCAS2, RBMXL1, DHX15, TENT2, RPF1, RBM17, INTS8, PIK3R1, MPHOSPH10, DYRK1A, DIS3, UTP3, INTS6, RBM7, RPL15, INTS7, SYF2, PTBP3, TSEN15, MBNL1, PAPOLA, WDR75, MRPL1, DDX21, ALKBH8, NOP58, DHX40, GTF2F2, PUS7L, SBDS, PPWD1, STRAP, RBM25, PPIL3, DHX36, RAVER2, MNAT1, DHX32, HEATR1, GTF2H1, RBMS2, RRP15, IVNS1ABP, PLRG1, CCNH, RSRC1, MTERF3, RTRAF, EGFR, CLK1, …
GO:0006605	protein targeting	500	20	11.03	3204	0.00707	0.85401	0.851807	1	The process of targeting specific proteins to particular membrane-bounded subcellular organelles. Usually requires an organelle specific protein sequence motif	0.787302	-1.30592	IPO4, PBLD, RPSA, RPL31, SUFU, RPS10, RPS21, RPS19, KPNA6, TNPO2, DNAJC19, THRA, TOMM5, TSPO, SMAD4, DNLZ, RPL10, TOMM40L, SPHK1, AKR1C3, RAB8B, UBL5, CDK5R1, RPL41, RPS8, RPS29, NLRP3, NFKBIE, RPS12, VTI1A, CDH1, LEPROT, GSK3B, TGFB1, TOMM7, CCDC22, RPL21, RPL35A, MIEF1, NAGPA, LMNA, RPL37A, MAVS, BAP1, PPP3R1, RPLP2, MIEF2, SREBF1, PEX6, ATG4B, RPS27A, PACS2, CDK1, STIMATE, RPL34, IPO7, RPS23, …	UBE2D3, SRP19, RPL39, NOV, TNPO1, PIK3R1, HSP90AA1, RPL15, YWHAZ, BNIP3L, CSNK2A2, VPS36, PEX3, WDR75, TOMM20, NPEPPS, NCOA4, NUP35, NUP54, PRNP, AP3B1, AP3M1, KPNA3, PEX12, HNMT, SDCBP, ZFAND6, FBXW7, GOLGA7, EGFR, MFF, ZFYVE16, RAB6A, RPL36A, SRP72, NUP88, LAMP2, SRP54, SH3GLB1, RANBP6, SRP14, SYNJ2BP, PEX1, HSPA4, GREM1, SPCS2, RPL17-C18orf32, MED1, KPNA4, PEX2, CEP57, SRP9, ATG4A, RPL9, RPL17…
GO:0051240	positive regulation of multicellular org...	716	26	15.79	139	0.0078	0.02986	0.928235	1	Any process that activates or increases the frequency, rate or extent of an organismal process, any of the processes pertinent to the function of an organism above the cellular level; includes the integrated processes of tissues and organs	1.0513	-1.25533	LRP8, CARD9, EXOSC6, SKIL, POLR3K, EEF2K, TOB2, ARHGAP35, CDK9, TIAM1, TRPV2, TBX2, CYR61, ADAM9, DOCK1, MTPN, BIN1, CHUK, SLC22A5, PRKCE, PPM1F, AP3D1, NCOA3, WASF3, BRCA1, EGR1, SMAD5, KISS1, RPS19, PLXNB1, NOTCH1, RNF135, UFL1, KITLG, ATOH8, TSPO, ANAPC2, ZNF703, SMAD4, MECP2, ADGRL1, MAGED1, PRKAA1, SEMA7A, SPHK1, FAM129B, TENM4, POLR3G, RAB8B, HILPDA, NLRP3, ATAD5, RNF10, CTTN, GATA2, GDPD5,…	CD58, PDGFD, NFE2L2, CREB1, PIK3R1, HPSE, ADNP, GPAM, ZBTB1, EIF2AK2, DNM1L, LY96, TMF1, PPP2R3C, LYN, AKIRIN2, RTN4, LUM, MSH2, SNX3, ATP11C, SMURF2, NCK1, PUM2, RAB11A, TBC1D23, AP3B1, GPRC5B, GCH1, CADM1, MAN2A1, TCF12, BASP1, DHX36, ATP6AP2, SDCBP, AC068234.1, MKL2, CAPRIN1, NKX3-1, PIBF1, SLC1A1, MSH6, EGFR, GLMN, EXOSC3, SNX4, SMAP1, ATG5, ISL1, MTDH, IQGAP3, TFAP2A, SPP1, OXTR, ZC3HAV1, SS…
GO:0006940	regulation of smooth muscle contraction	19	3	0.42	22	0.00789	0.00789	0.928235	1	Any process that modulates the frequency, rate or extent of smooth muscle contraction	0.332281	-0.231629	DAPK3, SPHK1, CTTN, DOCK5	OXTR, RGS2
GO:0007265	Ras protein signal transduction	215	11	4.74	23	0.008	0.008	0.930233	1	A series of molecular signals within the cell that are mediated by a member of the Ras superfamily of proteins switching to a GTP-bound active state	0.812202	-1.08621	KIF14, TAX1BP3, ARHGAP35, TIAM1, PREX1, TRIO, CHUK, MADD, AKAP13, EPS8L1, NRAS, VAV2, KITLG, SHOC2, PLEKHG3, KRAS, FOXM1, DENND1A, RASSF1, PLEKHG4, FLCN, GPR4, RAPGEF1, CRKL, HRAS, GPR17, ARHGAP44, RDX, PDGFRB, ARHGEF10L, ARHGEF4, ARHGEF19, DENND4B, DBNL, JUN, ARF6, MYO9B	ITGB1, TIAM2, DOK3, ARHGAP5, RASA1, RASGRF1, COL3A1, DNMBP, SOS2, RAP1B, AGTR1, GNA13, IQGAP3, ARHGEF12, HACE1, SYNJ2BP, NOTCH2, F2RL2, RAPGEF2, HACD3, CDC42EP3, SHC1, CTNNAL1, SPRY2, MET, CYFIP1, EPS8, NCKAP1, RRAS2, STAMBP, PSD3, PLEKHG7, NF1, CCNA2, TNFAIP1, TGFB2, ECT2, ROBO1, PPP2CB, ARHGEF26, KANK1
GO:0006518	peptide metabolic process	616	23	13.59	2804	0.0089	0.69988	1	1	The chemical reactions and pathways involving peptides, compounds of two or more amino acids where the alpha carboxyl group of one is bound to the alpha amino group of another	0.828242	-1.3597	MEX3D, EEF2K, GTF2H3, RPSA, RPL31, MTPN, IGFBP5, EIF2B1, TNRC6B, RPS10, MRPL54, RPS21, RPS19, SECISBP2L, DAPK3, GGT7, LARP4, RPL10, UQCC2, LNPEP, DDX6, GIGYF2, RPL41, RPS8, MRPS21, RPS29, RPS12, TGFB1, DNAJC3, RPL21, PTBP1, RPL35A, RPL37A, FOXO3, RPLP2, RPS27A, ZNF598, SARS2, EIF1AX, SERP1, RPL22L1, RPL34, RPS23, CHCHD1, NHP2, TNIP1, TARBP2, XRN1, PTRH1, MAP2K1, CHAC1, ABTB1, GCLM, MRPL23, EIF2AK…	EIF3M, MRPS30, RPL39, GSPT1, CPD, NFE2L2, EIF3E, PAIP1, CPE, GSPT2, HSP90AA1, AASDH, RPL15, EIF2AK2, CPA3, MRPL3, MRPL1, PPP1R15B, EIF2A, NPEPPS, IARS, FAM129A, EEF1E1, IREB2, NPM1, NCK1, PUM2, EIF1B, C12orf65, EIF3J, RARS, ATP6AP2, DARS2, CAPRIN1, EIF3H, ALDH5A1, WARS2, EGFR, MTIF3, HNRNPR, RMND1, MRPS9, DDX5, RPL36A, TNRC6A, PRKRA, GARS, ALKBH1, PROS1, LAMP2, MALSU1, YAE1D1, SSB, EIF4B, GGCT, F…
GO:0033108	mitochondrial respiratory chain complex ...	82	6	1.81	24	0.00933	0.00933	1	1	The aggregation, arrangement and bonding together of a set of components to form a mitochondrial respiratory chain complex	0.610909	-0.661209	NDUFA11, NDUFA2, PET100, NDUFB2, UQCC2, NDUFA9, COX14, NDUFB6, TAZ, SURF1, IMMP2L, NDUFAF4	UQCRB, NDUFS1, AP003108.2, NDUFA12, NDUFAF6, NUBPL, SDHAF3, NDUFB1, COX20, NDUFA6, NDUFAF7
GO:0044265	cellular macromolecule catabolic process	767	27	16.92	3354	0.01	0.95119	1	1	The chemical reactions and pathways resulting in the breakdown of a macromolecule, any large molecule including proteins, nucleic acids and carbohydrates, as carried out by individual cells	0.981921	-1.52393	PSMA6, SKP2, EXOSC6, RNF6, KIF14, PNPT1, RPSA, ANAPC7, UBC, POP1, RPL31, SOCS4, SUFU, TNRC6B, RPS10, UBXN2A, RPS21, RNF166, RPS19, UFL1, ANAPC2, CBL, POMT2, FBXL19, EDC3, ZHX2, RPL10, UQCC2, DNA2, ANAPC11, DDX6, RPL41, RPS8, RPS29, TRPC4AP, RNF11, RPS12, FBXO31, EDEM1, GSK3B, CTSV, ISG15, DNAJC3, CCDC22, LSM5, USP3, PSMB10, RPL21, RPL35A, THRAP3, UBR2, RPL37A, RNH1, ZSWIM9, BAP1, CHEK2, RPLP2, RA…	PSMD5, UBE2D3, PPT1, OMA1, RPL39, RNASEH2B, MTREX, GSPT1, UCHL5, NFE2L2, EIF3E, PSMD12, USP25, TENT2, USP38, PAIP1, HPSE, DIS3, GSPT2, RPL15, BNIP3L, TMTC3, USP14, UBE2N, TMF1, TATDN1, VPS37A, RFFL, VPS36, PSMA1, USP9Y, ANAPC10, ZMPSTE24, TRIM13, SMURF2, SUMO1, TAF9, PSMC6, TOPORS, CRBN, WWP1, CDC23, PPP2R5C, UBE3A, UPF2, PSMA4, OPHN1, SDCBP, BBS7, TTC37, UBE2A, FBXW7, KLHL20, NGLY1, LSM1, HNRNPR…
GO:0042886	amide transport	1379	43	30.42	1558	0.01019	0.3393	1	1	The directed movement of an amide, any compound containing one, two, or three acyl groups attached to a nitrogen atom, into, out of or within a cell, or between cells, by means of some agent such as a transporter or pore	0.930216	-1.53634	IPO4, SNAP29, SYTL3, SLC25A32, CDC40, MAK, PBLD, TOM1, RPSA, TIAM1, TSNAX, LIN7C, SPIRE2, ADAM9, RPL31, RAB26, NEURL1B, CHUK, PRKCE, IFI27, HOOK3, AP3D1, SUFU, RPS10, WDR33, STX16, ZNF593, SNX8, RPS21, TBC1D14, NDFIP2, SLC19A1, KISS1, RPS19, KPNA6, DGKD, SYT11, GGA2, SAR1B, MYO5A, ARFIP1, TNPO2, SNX19, NOTCH1, DNAJC19, THRA, ENTR1, TOMM5, TSPO, TAP2, RAB11FIP5, SMAD4, SCRIB, STXBP3, DNLZ, SUPT6H,…	UBE2D3, EXOC5, PPT1, SLU7, SRP19, CD58, RPL39, LYPLA1, LINC02210-CRHR1, NOV, TNPO1, SEC31A, RPGR, SCAMP1, SNX13, WDR35, COG5, PIK3R1, RABGAP1L, TMEM167A, GPAM, FMN2, HSP90AA1, RPL15, YWHAZ, BNIP3L, DNM1L, LYN, IFT74, SNX2, VPS37A, SNX14, CSNK2A2, KDELR3, VPS36, PEX3, WDR75, TOMM20, SEC61A2, SNX3, NPEPPS, SFT2D1, NUPL2, NPM1, NCOA4, MON2, VTA1, NUP35, RAB11A, NUP54, PRNP, AP3B1, CHMP2B, CADM1, AP3…
GO:0043408	regulation of MAPK cascade	349	15	7.7	25	0.01026	0.01026	1	1	Any process that modulates the frequency, rate or extent of signal transduction mediated by the MAP kinase (MAPK) cascade	0.903392	-1.30096	CARD9, FGFR3, SH3RF1, FZD8, TIAM1, UBC, CYR61, ADAM9, RASSF2, PRKCE, PDE8A, MADD, AKAP13, KISS1, KITLG, SMAD4, TRIM5, KRAS, IKBKG, MAGED1, TAB3, PRKAA1, SEMA7A, FOXM1, STK40, MAP2K3, S1PR2, C5AR1, FLCN, CDH2, CSPG4, TGFB1, RAPGEF1, DUSP10, CRKL, HRAS, PTPRJ, EFNA1, RPS27A, EZR, APIP, CDK1, HMGCR, IRAK2, PDGFRB, NENF, TIMP3, ATF3, DUSP8, PSAP, MAP3K15, TNIP1, ERP29, HYAL2, MAP2K1, DBNL, JUN, PTPN1…	ZNF675, DVL3, PDGFD, NRK, PDCD10, GDF11, MAP2K4, ZMYND11, EIF2AK2, VRK2, UBE2N, LYN, PDGFRA, HSPH1, ATP6AP2, TAB2, ARL6IP5, SDCBP, DNAJC27, AIDA, MAP3K20, DNAJA1, FBXW7, EGFR, RAP1B, MBIP, HIPK3, IQGAP3, LAMTOR3, GPS2, MAP3K21, IQGAP1, SYNJ2BP, STK3, PIK3CB, RGS2, RAPGEF2, HACD3, SHC1, C5, TAOK3, RYK, SPRY2, IL1B, ERN1, NPTN, WNT5A, BMP4, PHLPP1, RIPK2, SPAG9, NF1, TGFB2, ERCC6, MAP3K7
GO:0000469	cleavage involved in rRNA processing	21	3	0.46	1562	0.01049	0.34295	1	1	Any phosphodiester bond hydrolysis involved in the conversion of a primary ribosomal RNA (rRNA) transcript into a mature rRNA molecule	0.399134	-0.286319	RPSA, RPS21, FCF1, NHP2, BOP1	MRPL1, EXOSC3
GO:1902115	regulation of organelle assembly	110	7	2.43	26	0.01075	0.01075	1	1	Any process that modulates the frequency, rate or extent of organelle assembly	0.701924	-0.74941	ARHGAP35, MAK, BRCA1, AKAP13, TBC1D14, SMAD4, SEPT9, HTT, STX18, CEP135, CROCC, MAP4, CCP110, FSCN1, EZR, CHMP1A, RDX, CYLD, MAPK9, RAB3GAP1	NPM1, CHMP2B, SDCBP, SCFD1, MDM1, ATG5, SENP6, CCSAP, SH3GLB1, DYNC2LI1, PDCD6IP, CNOT2, CNOT1, SYNE2, CEP120, BECN1, PIKFYVE, SEPT7, VPS11
GO:0042127	regulation of cell proliferation	810	28	17.87	27	0.01104	0.01104	1	1	Any process that modulates the frequency, rate or extent of cell proliferation	1.10135	-1.42058	ADAMTS1, FGFR3, SKP2, CERS2, FOSL2, KIF14, SSTR1, TAX1BP3, TOB2, SOD2, PBLD, TIAM1, TBX2, CYR61, IGFBP7, BIRC6, IGFBP5, RPA3, BRCA1, CCAR1, EGR1, AHR, HMGN5, CDCA7L, KISS1, PLXNB1, DDX20, NOTCH1, SLC35F6, UFL1, KITLG, ATOH8, TSPO, ZNF703, SMAD4, MDM4, MECP2, KRAS, MAGED1, COPS9, PRKAA1, SPHK1, ROMO1, FAM129B, FOXM1, AKR1C3, XIAP, HILPDA, PBRM1, PLCD1, ATAD5, RNF10, S1PR2, GATA2, TSPAN31, TFAP4, J…	ITGB1, MTBP, RNASEH2B, PDGFD, NOV, NRK, PDCD10, GDF11, CREB1, ABCC4, HPSE, MARCH7, GPAM, EIF2AK2, SYF2, STAT1, GNG5, LYN, IFT74, AKIRIN2, NAP1L1, RTN4, KRIT1, EEF1E1, NPM1, NCK1, NAMPT, MBD2, TNFRSF11B, PDGFRA, PRNP, TOPORS, C18orf54, MCC, PPP2R5C, CIP2A, STRAP, MNAT1, SDCBP, AC068234.1, NKX3-1, BCHE, HIST1H2AC, RBBP9, UBE2A, FBXW7, EGFR, TTK, GLMN, SH3BP4, PHIP, AGTR1, ISL1, IQGAP3, TFAP2A, PLAC…
GO:0022618	ribonucleoprotein complex assembly	166	9	3.66	1173	0.01114	0.237	1	1	The aggregation, arrangement and bonding together of proteins and RNA molecules to form a ribonucleoprotein complex	0.695435	-1.10237	NUFIP1, RPSA, RPS10, RPS19, DDX20, EDC3, RPL10, DDX6, DDX28, SNRPB, NOP53, GEMIN8, RBM5, TARBP2, SNRNP200, CD2BP2, TGS1, RPS27L, GEMIN7, RPS28	SLU7, RPF1, BRIX1, HSP90AA1, PTGES3, EIF2A, NPM1, PUM2, TAF9, SBDS, STRAP, MTERF3, SRPK1, EIF4B, RC3H1, RBMX, CNOT2, PATL1, CNOT1, EIF5, CRNKL1, PRPF39, ZNHIT6, FASTKD2, EIF4H, PSIP1, SRPK2, LUC7L3, SNRPG
GO:0015980	energy derivation by oxidation of organi...	197	10	4.35	28	0.01183	0.01183	1	1	The chemical reactions and pathways by which a cell derives energy from organic compounds; results in the oxidation of the compounds from which energy is released	0.805819	-0.885339	PPP1R3D, D2HGDH, PNPT1, NDUFA11, UQCRHL, UBC, NDUFA2, PYGB, NDUFB2, MECP2, STK40, NDUFA9, GSK3B, UQCRQ, NDUFB6, COX10, STBD1, RPS27A, CDK1, HIF1A, OGDH, TBRG4, TAZ, IRS1, C1QTNF2, SURF1, IMMP2L	UGP2, UQCRB, FASTKD3, NDUFS1, CALM2, AP003108.2, ALDH5A1, IDH3A, PMPCB, NDUFA12, GFPT1, PPP1R3E, NNT, GYG1, PDHB, ETFDH, NOA1, SLC25A13, NDUFB1, FASTKD2, PPP1CC, COX20, PANK2, SDHD, NDUFA6, PGM2, PYGL, DLD
GO:0044248	cellular catabolic process	1354	42	29.87	2714	0.01216	0.66724	1	1	The chemical reactions and pathways resulting in the breakdown of substances, carried out by individual cells	1.11223	-1.52393	ACAD11, PSMA6, SKP2, EXOSC6, RNF6, FTCD, KIF14, VPS13C, SNAP29, PIK3C2B, PPP1R3D, PNPT1, RPSA, ACBD5, ANAPC7, UBC, POP1, ADAM9, RPL31, LAMTOR4, SLC27A4, SOCS4, PDE8A, SUFU, TNRC6B, RPS10, DCTPP1, PTPN3, UBXN2A, RPS21, TBC1D14, TET2, RNF166, RPS19, PYGB, UFL1, TOMM5, TSPO, ANAPC2, DAPK3, CBL, LDLR, POMT2, GGT7, TRIM5, FBXL19, IKBKG, EDC3, HTT, ZHX2, RPL10, UQCC2, TAB3, DNA2, PRKAA1, SPHK1, ANAPC11…	PSMD5, UBE2D3, PPT1, OMA1, RPL39, RNASEH2B, MTREX, GSPT1, UCHL5, NFE2L2, EIF3E, PSMD12, USP25, TENT2, USP38, PAIP1, HPSE, GPD2, DIS3, GSPT2, HSP90AA1, RPL15, BNIP3L, DNM1L, TMTC3, USP14, UBE2N, TMF1, TATDN1, VPS37A, RFFL, SNX14, CSNK2A2, TMEM59, VPS36, DRAM2, PSMA1, USP9Y, ANAPC10, WDR75, LUM, TOMM20, ZMPSTE24, NPEPPS, TRIM13, SMURF2, SUMO1, VTA1, TAF9, PSMC6, ABCD3, FUNDC1, CHMP2B, TOPORS, CRBN,…
GO:0045184	establishment of protein localization	1474	45	32.51	1560	0.0123	0.34146	1	1	The directed movement of a protein to a specific location	1.01929	-1.70568	FAM126A, IPO4, KIF14, SNAP29, SYTL3, CDC40, MAK, PBLD, TOM1, RPSA, TIAM1, TSNAX, LIN7C, SPIRE2, ADAM9, RPL31, RAB26, NEURL1B, CHUK, PRKCE, IFI27, HOOK3, AP3D1, SUFU, RPS10, WDR33, STX16, ZNF593, SNX8, RPS21, TBC1D14, NRAS, NDFIP2, RPS19, KPNA6, WRAP53, DGKD, CRIPT, SYT11, GGA2, SAR1B, MYO5A, ARFIP1, TNPO2, SNX19, NOTCH1, DNAJC19, THRA, ENTR1, TOMM5, TSPO, TAP2, RAB11FIP5, SMAD4, SCRIB, STXBP3, DN…	POT1, ITGB1, UBE2D3, EXOC5, PPT1, SLU7, SRP19, CD58, RPL39, LYPLA1, NOV, TNPO1, SEC31A, RPGR, SCAMP1, SNX13, WDR35, CEP55, COG5, PIK3R1, RHOQ, RABGAP1L, TMEM167A, KIAA0586, GPAM, FMN2, HSP90AA1, RPL15, YWHAZ, REEP1, BNIP3L, DNM1L, LYN, IFT74, SNX2, VPS37A, SNX14, CSNK2A2, KDELR3, TMEM59, VPS36, PEX3, WDR75, TOMM20, SEC61A2, SNX3, NPEPPS, SFT2D1, NUPL2, NPM1, NCOA4, MON2, VTA1, NUP35, RAB11A, NUP5…
GO:0000447	endonucleolytic cleavage in ITS1 to sepa...	8	2	0.18	29	0.01242	0.01242	1	1	Endonucleolytic cleavage between the SSU-rRNA and the 5.8S rRNA of an rRNA molecule originally produced as a tricistronic rRNA transcript that contained the Small SubUnit (SSU) rRNA, the 5.8S rRNA, and the Large SubUnit (LSU) rRNA, in that order, from 5' to 3' along the primary transcript	0.325592	0.325592	RPSA, RPS21, FCF1
GO:0016043	cellular component organization	3856	101	85.06	367	0.0128	0.07119	1	1	A process that results in the assembly, arrangement of constituent parts, or disassembly of a cellular component	1.48097	-1.91259	MIGA1, TUBB2A, PEX11A, FAM126A, LRP8, ITGB8, TRAPPC13, PHC1, KAT6A, IPO4, CERS2, EGLN2, PKN2, NUFIP1, SKIL, RNF6, PSPN, ATAD2B, MZT1, FTCD, KIF14, VPS13C, TIE1, SNAP29, CCNK, EEF2K, ARHGAP18, GAS2L3, THSD4, PIK3C2B, H3F3A, VILL, SYTL3, GTF2H3, SSH2, TPGS1, PRKAR2B, PI4K2B, CDYL, SOD2, CLGN, C21orf2, PNPT1, ARHGAP35, MAK, NDUFA11, DYM, CDK9, DNAJC6, RPSA, HIST1H2AG, TIAM1, TLN2, MTHFR, TRPV2, ANAP…	POT1, NEDD1, ITGB1, GEM, ATP2C1, CETN2, PSMD5, DNAJC28, POLE2, HAT1, UBE2D3, PPT1, SLU7, OMA1, TERF2IP, SRP19, MTBP, DVL3, MRPS30, LYPLA1, GSPT1, SUPT3H, EPC1, ACTR6, NOV, RNF2, NFE2L2, COL11A1, TNPO1, SEC31A, KIAA1109, PDCD10, CCNG1, RPF1, TLL1, RPGR, SMC6, WDR35, SLC9A6, YEATS4, TRAPPC6B, BRIX1, CREB1, TANC1, TAF5, ABCC4, PIK3R1, RHOQ, ARPC5, RABGAP1L, SIN3A, ADNP, BAZ2A, ITGB3BP, UTP3, KIAA058…
GO:0051234	establishment of localization	2892	79	63.79	1368	0.01284	0.28838	1	1	The directed movement of a cell, substance or cellular entity, such as a protein complex or organelle, to a specific location	1.664	-1.83746	SLC4A7, SPNS2, TMEM38A, FAM126A, LRP8, PSMA6, SLC25A30, IPO4, NHLRC2, KIF14, VPS13C, SNAP29, EEF2K, SYTL3, SLC25A32, CDC40, PNPT1, MAK, PBLD, MCOLN2, DNAJC6, TOM1, RPSA, SLC17A5, UQCRHL, TIAM1, TSNAX, TRPV2, ACBD5, UBC, LIN7C, TUB, SLC9B1, SPIRE2, GJC2, ADAM9, RPL31, OSBPL6, DOCK1, RAB26, NEURL1B, BIN1, DEGS1, CHUK, SLC12A2, SLC22A5, ORAI2, PRKCE, IFI27, HOOK3, SLC27A4, TM9SF2, SCN9A, AP3D1, SUFU…	POT1, ITGB1, GEM, ATP2C1, PSMD5, DNAJC28, TMEM184C, UBE2D3, EXOC5, PPT1, SLU7, ATP5F1EP2, SRP19, CD58, SLC30A4, XPR1, RPL39, LYPLA1, YPEL5, LINC02210-CRHR1, NOV, NFE2L2, TNPO1, SEC31A, PSMD12, PDCD10, RPGR, SCAMP1, SNX13, WDR35, SLC9A6, CEP55, COG5, TRAPPC6B, CREB1, ABCC4, PIK3R1, AZIN1, HPSE, RHOQ, ARPC5, RABGAP1L, TMEM167A, KIAA0586, MON1B, CENPQ, PFN2, SLC22A4, GPAM, FMN2, SLC25A46, HSP90AA1, …
GO:0071824	protein-DNA complex subunit organization	171	9	3.77	31	0.01335	0.01335	1	1	Any process in which macromolecules aggregate, disaggregate, or are modified, resulting in the formation, disassembly, or alteration of a protein-DNA complex	0.879791	-1.1936	KAT6A, IPO4, H3F3A, GTF2H3, UBC, TAF9B, RPA3, TAF4, HIST1H2BJ, THRA, SUPT6H, H1FX, KAT6B, BRF1, TSPYL4, MCM2, SPTY2D1, KNL1, RPS27A, NAP1L4, MIS18BP1, HJURP, HIST1H1C, WNT10B, H1F0, ZNHIT1, UBN1	CETN2, HAT1, CREB1, ITGB3BP, CENPQ, GTF2B, NAP1L1, NPM1, TAF9, PSMC6, MNAT1, CENPI, GTF2H1, CCNH, SENP6, SET, RBBP4, GMNN, HIST2H2BE, RAD52, CAND1, CENPK, CENPU, CENPE, RAD51C
GO:0043954	cellular component maintenance	23	3	0.51	32	0.01353	0.01353	1	1	The organization process that preserves a cellular component in a stable functional or structural state	0.429084	-0.579856	MTHFR, KIFC3, SUPT6H, CTTN, LNPK	TANC1, PRNP, C1QL1, PLEKHA7, SUPV3L1, RASSF8, PKP2, FYN
GO:0000165	MAPK cascade	463	18	10.21	33	0.01368	0.01368	1	1	An intracellular protein kinase cascade containing at least a MAPK, a MAPKK and a MAP3K. The cascade can also contain two additional tiers: the upstream MAP4K and the downstream MAP Kinase-activated kinase (MAPKAPK). The kinases in each tier phosphorylate and activate the kinases in the downstream tier to transmit a signal within a cell	0.98244	-1.38718	CARD9, PSMA6, FGFR3, PSPN, SH3RF1, FZD8, TIAM1, UBC, CYR61, ADAM9, CHUK, RASSF2, PRKCE, MEF2D, PDE8A, MADD, AKAP13, NRAS, KISS1, KITLG, SMAD4, TRIM5, KRAS, IKBKG, MAGED1, TAB3, PRKAA1, SEMA7A, FOXM1, STK40, MARK3, MAP2K3, S1PR2, C5AR1, FLCN, CDH2, CSPG4, TGFB1, RAPGEF1, PSMB10, DUSP10, CRKL, HRAS, PTPRJ, EFNA1, RPS27A, EZR, APIP, CDK1, HMGCR, MAPK12, HSF1, IRAK2, PDGFRB, NENF, TIMP3, ATF3, DUSP8,…	PSMD5, ZNF675, DVL3, PDGFD, NRK, PSMD12, PDCD10, GDF11, MAP2K4, ZMYND11, EIF2AK2, VRK2, UBE2N, LYN, RASA1, PSMA1, RASGRF1, PDGFRA, PSMC6, HSPH1, PSMA4, ATP6AP2, TAB2, CALM2, ARL6IP5, SDCBP, DNAJC27, AIDA, MAP3K20, DNAJA1, FBXW7, EGFR, RAP1B, MBIP, HIPK3, MAPK8, IQGAP3, OXTR, LAMTOR3, FGF13, GPS2, MAP3K21, IQGAP1, SYNJ2BP, JAK1, STK3, PSMD14, PIK3CB, RGS2, RAPGEF2, HACD3, SHC1, C5, TAOK3, MED1, RY…
GO:0015833	peptide transport	1369	42	30.2	1797	0.01454	0.40131	1	1	The directed movement of peptides, compounds of two or more amino acids where the alpha carboxyl group of one is bound to the alpha amino group of another, into, out of or within a cell, or between cells, by means of some agent such as a transporter or pore	0.921516	-1.53634	IPO4, SNAP29, SYTL3, CDC40, MAK, PBLD, TOM1, RPSA, TIAM1, TSNAX, LIN7C, SPIRE2, ADAM9, RPL31, RAB26, NEURL1B, CHUK, PRKCE, IFI27, HOOK3, AP3D1, SUFU, RPS10, WDR33, STX16, ZNF593, SNX8, RPS21, TBC1D14, NDFIP2, KISS1, RPS19, KPNA6, DGKD, SYT11, GGA2, SAR1B, MYO5A, ARFIP1, TNPO2, SNX19, NOTCH1, DNAJC19, THRA, ENTR1, TOMM5, TSPO, TAP2, RAB11FIP5, SMAD4, SCRIB, STXBP3, DNLZ, SUPT6H, MIDN, STX18, RPL10…	UBE2D3, EXOC5, PPT1, SLU7, SRP19, CD58, RPL39, LYPLA1, LINC02210-CRHR1, NOV, TNPO1, SEC31A, RPGR, SCAMP1, SNX13, WDR35, COG5, PIK3R1, RABGAP1L, TMEM167A, GPAM, FMN2, HSP90AA1, RPL15, YWHAZ, BNIP3L, DNM1L, LYN, IFT74, SNX2, VPS37A, SNX14, CSNK2A2, KDELR3, VPS36, PEX3, WDR75, TOMM20, SEC61A2, SNX3, NPEPPS, SFT2D1, NUPL2, NPM1, NCOA4, MON2, VTA1, NUP35, RAB11A, NUP54, PRNP, AP3B1, CHMP2B, CADM1, AP3…
GO:0032508	DNA duplex unwinding	66	5	1.46	34	0.01496	0.01496	1	1	The process in which interchain hydrogen bonds between two strands of DNA are broken or 'melted', generating a region of unpaired single strands	0.580055	-0.717168	GTF2H3, UBC, GINS1, DNA2, MCM2, RPS27A, RTEL1, TWNK, RECQL5, MCM3	POT1, CETN2, GTF2H1, SUPV3L1, CHD1
GO:0070979	protein K11-linked ubiquitination	24	3	0.53	35	0.01521	0.01521	1	1	A protein ubiquitination process in which ubiquitin monomers are attached to a protein, and then ubiquitin polymers are formed by linkages between lysine residues at position 11 of the ubiquitin monomers. K11-linked polyubiquitination targets the substrate protein for degradation. The anaphase-promoting complex promotes the degradation of mitotic regulators by assembling K11-linked polyubiquitin …	0.33866	-0.695291	ANAPC7, ANAPC2, ANAPC11	UBE2D3, ANAPC10, CDC23, UBE2A, ANAPC13, UBE2E2, CDC27, UBE2E3
GO:0071826	ribonucleoprotein complex subunit organi...	175	9	3.86	1309	0.01533	0.27383	1	1	Any process in which macromolecules aggregate, disaggregate, or are modified, resulting in the formation, disassembly, or alteration of a ribonucleoprotein complex	0.695435	-1.10237	NUFIP1, RPSA, RPS10, RPS19, DDX20, EDC3, RPL10, DDX6, DDX28, SNRPB, NOP53, GEMIN8, RBM5, TARBP2, SNRNP200, CD2BP2, TGS1, RPS27L, GEMIN7, RPS28	SLU7, RPF1, BRIX1, HSP90AA1, PTGES3, EIF2A, NPM1, PUM2, TAF9, SBDS, STRAP, MTERF3, MTIF3, SRPK1, EIF4B, RC3H1, RBMX, CNOT2, PATL1, CNOT1, EIF5, CRNKL1, PRPF39, ZNHIT6, FASTKD2, EIF4H, PSIP1, SRPK2, LUC7L3, SNRPG
GO:1901575	organic substance catabolic process	1255	39	27.68	2972	0.01535	0.75415	1	1	The chemical reactions and pathways resulting in the breakdown of an organic substance, any molecular entity containing carbon	1.12829	-1.53982	ACAD11, PSMA6, SKP2, EGLN2, EXOSC6, RNF6, FTCD, PNPLA7, KIF14, GPC2, PPP1R3D, PNPT1, RPSA, ANAPC7, UBC, POP1, ADAM9, RPL31, PRKCE, SLC27A4, SOCS4, PDE8A, SUFU, TNRC6B, RPS10, DCTPP1, PTPN3, UBXN2A, RPS21, TET2, RNF166, RPS19, PYGB, THRA, UFL1, PFKFB4, ANAPC2, CBL, MDM4, LDLR, POMT2, GGT7, FBXL19, EDC3, HTT, ZHX2, RPL10, UQCC2, DNA2, PRKAA1, SPHK1, ANAPC11, AKR1C3, LNPEP, DDX6, RPL41, RPS8, RPS29,…	PSMD5, UBE2D3, PPT1, OMA1, RPL39, LYPLA1, RNASEH2B, MTREX, GSPT1, UCHL5, NFE2L2, EIF3E, PSMD12, USP25, TENT2, USP38, PAIP1, AZIN1, HPSE, GPD2, DIS3, GSPT2, FMN2, HSP90AA1, RPL15, BNIP3L, LIPA, TMTC3, USP14, UBE2N, TMF1, TATDN1, VPS37A, RFFL, HMMR, VPS36, PSMA1, USP9Y, ANAPC10, LUM, SNX3, ZMPSTE24, NPEPPS, TRIM13, SMURF2, SUMO1, LYPLAL1, TAF9, PSMC6, ABCD3, TOPORS, CRBN, WWP1, CDC23, PPP2R5C, UBE3…
GO:0003376	sphingosine-1-phosphate signaling pathwa...	9	2	0.2	36	0.01574	0.01574	1	1	A series of molecular signals initiated by the sphingolipid sphingosine-1-phosphate (S1P) binding to a receptor on the surface of the cell, and which proceeds with the activated receptor transmitting the signal by promoting the exchange of GDP for GTP on the alpha-subunit of an associated heterotrimeric G-protein complex. The pathway ends with regulation of a downstream cellular process, e.g. tra…	0.428555	0.428555	SPNS2, SPHK1, S1PR2, EZR
GO:0007084	mitotic nuclear envelope reassembly	9	2	0.2	37	0.01574	0.01574	1	1	The cell cycle process that results in reformation of the nuclear envelope during mitotic cell division	0.119109	0.119109	LMNA, BANF1	PPP2R2A
GO:0009143	nucleoside triphosphate catabolic proces...	9	2	0.2	38	0.01574	0.01574	1	1	The chemical reactions and pathways resulting in the breakdown of a nucleoside triphosphate, a compound consisting of a nucleobase linked to a deoxyribose or ribose sugar esterified with triphosphate on the sugar	0.118227	0.118227	DCTPP1, ITPA, SAMHD1	SMPDL3A
GO:0019471	4-hydroxyproline metabolic process	9	2	0.2	3397	0.01574	1	1	1	The chemical reactions and pathways involving 4-hydroxyproline, C5H9NO3, a derivative of the amino acid proline. The presence of hydroxyproline is essential to produce stable triple helical tropocollagen, hence the problems caused by ascorbate deficiency in scurvy. This unusual amino acid is also present in considerable amounts in the major glycoprotein of primary plant cell walls	0.114649	0.114649	EGLN2, P4HB, ALDH4A1	ERO1A, EGLN1
GO:0032486	Rap protein signal transduction	9	2	0.2	39	0.01574	0.01574	1	1	A series of molecular signals within the cell that are mediated by a member of the Rap family of proteins switching to a GTP-bound active state	0.0892362	0.0892362	KIF14, RAPGEF1, RDX	RAP1B, RAPGEF2
GO:0045987	positive regulation of smooth muscle con...	9	2	0.2	40	0.01574	0.01574	1	1	Any process that activates or increases the frequency, rate or extent of smooth muscle contraction	0.131241	0.131241	SPHK1, CTTN	OXTR
GO:0060117	auditory receptor cell development	9	2	0.2	41	0.01574	0.01574	1	1	The process whose specific outcome is the progression of an auditory receptor cell over time, from its formation to the mature structure. Cell development does not include the steps involved in committing a cell to a specific fate	0.324511	0.324511	SLC4A7, SCRIB	SEC24B
GO:0031398	positive regulation of protein ubiquitin...	147	8	3.24	42	0.01598	0.01598	1	1	Any process that activates or increases the frequency, rate or extent of the addition of ubiquitin groups to a protein	0.821025	-1.14098	PSMA6, SKP2, CDK9, ANAPC7, UBC, BRCA1, NDFIP2, ANAPC2, SPHK1, ANAPC11, XIAP, CCDC22, PSMB10, BMI1, RPS27A, NDFIP1, CDK1, TICAM1, RASSF5, HSPA5, PSMA7, GORASP1	PSMD5, ARRDC3, PSMD12, UBE2N, DCUN1D5, PSMA1, ANAPC10, PSMC6, TOPORS, CDC23, UBE3A, PSMA4, FBXW7, DCUN1D4, RNF20, RAB1A, DERL1, FKBP1A, PSMD14, CDC27, PSMD6, UBE2E1, RIPK2, PSMD7, PTTG1IP, BIRC2
GO:0043410	positive regulation of MAPK cascade	238	11	5.25	43	0.01625	0.01625	1	1	Any process that activates or increases the frequency, rate or extent of signal transduction mediated by the MAPK cascade	0.87319	-1.14219	CARD9, FGFR3, FZD8, TIAM1, UBC, ADAM9, RASSF2, PRKCE, PDE8A, MADD, AKAP13, KISS1, KITLG, TRIM5, KRAS, IKBKG, MAGED1, TAB3, PRKAA1, SEMA7A, MAP2K3, S1PR2, C5AR1, CDH2, CSPG4, TGFB1, RAPGEF1, CRKL, HRAS, EFNA1, RPS27A, CDK1, HMGCR, IRAK2, PDGFRB, NENF, PSAP, MAP3K15, ERP29, MAP2K1, DBNL, JUN, PTPN1, C1QTNF2, TGFBR1, CSK	DVL3, PDGFD, NRK, PDCD10, MAP2K4, EIF2AK2, UBE2N, PDGFRA, TAB2, ARL6IP5, SDCBP, DNAJC27, MAP3K20, FBXW7, EGFR, RAP1B, IQGAP3, LAMTOR3, MAP3K21, IQGAP1, STK3, PIK3CB, RAPGEF2, HACD3, SHC1, C5, TAOK3, RYK, SPRY2, IL1B, ERN1, NPTN, WNT5A, BMP4, RIPK2, SPAG9, TGFB2, ERCC6, MAP3K7
GO:0016197	endosomal transport	207	10	4.57	600	0.01627	0.1231	1	1	The directed movement of substances into, out of or mediated by an endosome, a membrane-bounded organelle that carries materials newly ingested by endocytosis. It passes many of the materials to lysosomes for degradation	0.756243	-0.966904	VPS13C, TOM1, UBC, HOOK3, AP3D1, STX16, SNX8, TBC1D14, ENTR1, SCRIB, FAM160A2, STX6, DENND1A, PLEKHJ1, VTI1A, LEPROT, VPS26A, RAB12, SNX17, ARHGAP44, RPS27A, EZR, CHMP7, RDX, KIF13A, MAP2K1, DENND2A, VPS39, ARFRP1	DNM1L, SNX2, VPS37A, VPS36, SNX3, MON2, VTA1, RAB11A, CHMP2B, LEPROTL1, WASHC4, VAMP3, VPS54, KLHL20, SNX4, ZFYVE16, RAB6A, SCYL2, VPS29, RAB10, BLOC1S3, CHMP3, HMGXB4, SNX9, DNAJC13, VPS26B, BECN1, ANKRD27, ARL4C, PIKFYVE, SPAG9, RAB7A, EMP2, VPS11, ARL1
GO:0051704	multi-organism process	1260	39	27.79	1608	0.0163	0.34905	1	1	A biological process which involves another organism of the same or different species	1.16693	-1.5238	SPIN4, ADAMTS1, CARD9, PKN2, SKIL, POLR3K, CCNK, SSTR1, H3F3A, TOB2, TPGS1, CDYL, CLGN, MAK, CDK9, RPSA, CDK19, TSNAX, UBC, CREBZF, REC8, GFI1, IGFBP7, ADAM9, RPL31, IFNGR2, LIMK2, KLHL26, PALM3, IGFBP5, BIN1, CHUK, FNDC3A, SLC22A5, TAF4, PRKCE, NPHP1, CAMLG, HIST1H2BJ, RPS10, WDR33, SBNO2, SCMH1, RPS21, SMAD5, KISS1, RPS19, DDX20, KPNA6, UMPS, SYT11, NOTCH1, SPATA5, THRA, GOLGA3, TSPO, TAP2, SPA…	ITGB1, CETN2, THRB, XPR1, RPL39, LINC02210-CRHR1, RNF2, NRK, TNPO1, WDR35, CREB1, TAF5, PIK3R1, DYRK1A, SIN3A, PGM3, MAP2K4, MON1B, GPAM, ZMYND11, FMN2, RPL15, BUB1, EIF2AK2, GTF2B, VRK2, STAT1, ANKRD49, BNIP3L, LY96, KDM5A, TMF1, PPP2R3C, LYN, AKIRIN2, VPS37A, CSNK2A2, DYNC1LI1, USP9Y, MSH2, DDX21, SNX3, NUPL2, TRIM13, SMURF2, SUMO1, ZNF35, NPM1, NECTIN3, NCK1, VTA1, NUP35, PUM2, NAMPT, TNFRSF11…
GO:0021695	cerebellar cortex development	25	3	0.55	44	0.01701	0.01701	1	1	The process whose specific outcome is the progression of the cerebellar cortex over time, from its formation to the mature structure. The cerebellar cortex is a thin mantle of gray matter that covers the surface of each cerebral hemisphere. It has a characteristic morphology with convolutions (gyri) and crevices (sulci) that have specific functions. Six layers of nerve cells and the nerve pathway…	0.459162	-0.392849	KIF14, MTPN, UQCRQ, OGDH, HSPA5, MAP2K1	AGTPBP1, ARCN1, LDB1, MYH10
GO:0071705	nitrogen compound transport	1504	45	33.18	1772	0.01727	0.38973	1	1	The directed movement of nitrogen-containing compounds into, out of or within a cell, or between cells, by means of some agent such as a transporter or pore	0.934114	-1.53634	IPO4, SNAP29, SYTL3, SLC25A32, CDC40, PNPT1, MAK, PBLD, TOM1, RPSA, SLC17A5, TIAM1, TSNAX, LIN7C, SPIRE2, ADAM9, RPL31, RAB26, NEURL1B, CHUK, SLC12A2, SLC22A5, PRKCE, IFI27, HOOK3, AP3D1, SUFU, PPFIA3, RPS10, WDR33, STX16, FLVCR1, ZNF593, SNX8, RPS21, TBC1D14, NDFIP2, SLC19A1, KISS1, RPS19, KPNA6, DGKD, SYT11, GGA2, SAR1B, MYO5A, ARFIP1, TNPO2, SNX19, NOTCH1, DNAJC19, THRA, ENTR1, TOMM5, TSPO, TA…	UBE2D3, EXOC5, PPT1, SLU7, SRP19, CD58, RPL39, LYPLA1, LINC02210-CRHR1, NOV, TNPO1, SEC31A, RPGR, SCAMP1, SNX13, WDR35, COG5, PIK3R1, AZIN1, RABGAP1L, TMEM167A, SLC22A4, GPAM, FMN2, HSP90AA1, RPL15, YWHAZ, BNIP3L, DNM1L, LYN, IFT74, SNX2, VPS37A, SNX14, CSNK2A2, KDELR3, VPS36, PEX3, WDR75, TOMM20, SEC61A2, SNX3, NPEPPS, SFT2D1, SLC25A36, NUPL2, NPM1, NCOA4, MON2, VTA1, NUP35, RAB11A, NUP54, PRNP,…
GO:0006810	transport	2797	76	61.7	1607	0.01731	0.34904	1	1	The directed movement of substances (such as macromolecules, small molecules, ions) into, out of or within a cell, or between cells, or within a multicellular organism by means of some agent such as a transporter or pore	1.59876	-1.72329	SLC4A7, SPNS2, TMEM38A, LRP8, PSMA6, SLC25A30, IPO4, NHLRC2, VPS13C, SNAP29, EEF2K, SYTL3, SLC25A32, CDC40, PNPT1, MAK, PBLD, MCOLN2, DNAJC6, TOM1, RPSA, SLC17A5, UQCRHL, TIAM1, TSNAX, TRPV2, ACBD5, UBC, LIN7C, TUB, SLC9B1, SPIRE2, GJC2, ADAM9, RPL31, OSBPL6, DOCK1, RAB26, NEURL1B, BIN1, DEGS1, CHUK, SLC12A2, SLC22A5, ORAI2, PRKCE, IFI27, HOOK3, SLC27A4, TM9SF2, SCN9A, AP3D1, SUFU, PPFIA3, RPS10,…	ITGB1, ATP2C1, PSMD5, DNAJC28, TMEM184C, UBE2D3, EXOC5, PPT1, SLU7, ATP5F1EP2, SRP19, CD58, SLC30A4, XPR1, RPL39, LYPLA1, YPEL5, LINC02210-CRHR1, NOV, NFE2L2, TNPO1, SEC31A, PSMD12, RPGR, SCAMP1, SNX13, WDR35, SLC9A6, COG5, TRAPPC6B, CREB1, ABCC4, PIK3R1, AZIN1, HPSE, RHOQ, ARPC5, RABGAP1L, TMEM167A, MON1B, PFN2, SLC22A4, GPAM, FMN2, SLC25A46, HSP90AA1, SLC46A3, RPL15, UQCRB, YWHAZ, REEP1, DCTN4,…
GO:0051436	negative regulation of ubiquitin-protein...	70	5	1.54	45	0.01889	0.01889	1	1	Any process that stops, prevents, or reduces the frequency, rate or extent of ubiquitin ligase activity that contributes to the mitotic cell cycle	0.644813	-0.942602	PSMA6, ANAPC7, UBC, ANAPC2, ANAPC11, PSMB10, RPS27A, CDK1, PSMA7	PSMD5, PSMD12, PSMA1, ANAPC10, PSMC6, CDC23, PSMA4, PSMD14, CDC27, PSMD6, UBE2E1, PSMD7
GO:0009141	nucleoside triphosphate metabolic proces...	212	10	4.68	2154	0.01891	0.4899	1	1	The chemical reactions and pathways involving a nucleoside triphosphate, a compound consisting of a nucleobase linked to a deoxyribose or ribose sugar esterified with triphosphate on the sugar	0.709107	-0.984715	NDUFA11, UQCRHL, NDUFA2, DCTPP1, NDUFB2, NME3, FIGNL1, PFKFB4, TSPO, MECP2, UQCC2, PRKAA1, NDUFA9, IMPDH1, ITPA, FLCN, UQCRQ, TGFB1, NDUFB6, UCK1, SAMHD1, COX10, SIRT6, PARG, CDK1, HIF1A, OGDH, TAZ, SURF1	ATP5F1EP2, RHOQ, UQCRB, DNM1L, MSH2, NDUFS1, AP003108.2, ATP5F1C, MOCS2, MBIP, CMPK1, PMPCB, AK3, NDUFA12, RRM2B, TBPL1, BPGM, SLC25A13, NFS1, HSPA8, NDUFB1, CTPS1, GAPDH, SMPDL3A, SDHD, NDUFA6, AK9, NME7, NDUFAF7, TYMS, NMNAT1, DLD
GO:0006294	nucleotide-excision repair, preincision ...	26	3	0.57	46	0.01892	0.01892	1	1	The aggregation, arrangement and bonding together of proteins on DNA to form the multiprotein complex involved in damage recognition, DNA helix unwinding, and endonucleolytic cleavage at the site of DNA damage. This assembly occurs before the phosphodiester backbone of the damaged strand is cleaved 3' and 5' of the site of DNA damage	0.493059	-0.545502	GTF2H3, UBC, RPA3, RPS27A	CETN2, MNAT1, GTF2H1, CCNH
GO:0046578	regulation of Ras protein signal transdu...	123	7	2.71	47	0.01893	0.01893	1	1	Any process that modulates the frequency, rate or extent of Ras protein signal transduction	0.775824	-0.995556	KIF14, ARHGAP35, TIAM1, PREX1, TRIO, MADD, AKAP13, EPS8L1, VAV2, KITLG, SHOC2, PLEKHG3, KRAS, FOXM1, DENND1A, PLEKHG4, FLCN, GPR4, RAPGEF1, HRAS, GPR17, ARHGAP44, RDX, PDGFRB, ARHGEF10L, ARHGEF4, ARHGEF19, DENND4B, ARF6, MYO9B	ITGB1, TIAM2, RASA1, RASGRF1, COL3A1, DNMBP, SOS2, ARHGEF12, NOTCH2, F2RL2, SPRY2, MET, STAMBP, PSD3, PLEKHG7, NF1, TNFAIP1, TGFB2, ECT2, ROBO1, PPP2CB, ARHGEF26, KANK1
GO:0019511	peptidyl-proline hydroxylation	10	2	0.22	3398	0.01939	1	1	1	The hydroxylation of peptidyl-proline to form peptidyl-hydroxyproline	0.147953	0.147953	EGLN2, P4HB	EGLN1
GO:0060561	apoptotic process involved in morphogene...	10	2	0.22	48	0.01939	0.01939	1	1	Any apoptotic process that contributes to the shaping of an anatomical structure	0.214568	0.214568	CYR61, NOTCH1, SCRIB, VDR, BAK1	TGFB2, LEF1
GO:0090520	sphingolipid mediated signaling pathway	10	2	0.22	49	0.01939	0.01939	1	1	A series of molecular signals mediated by a sphingolipid	0.408853	0.408853	SPNS2, SPHK1, S1PR2, EZR
GO:0023014	signal transduction by protein phosphory...	481	18	10.61	50	0.01945	0.01945	1	1	A process in which the transfer of one or more phosphate groups to a substrate transmits a signal to the phosphorylated substrate	0.98244	-1.38718	CARD9, PSMA6, FGFR3, PSPN, SH3RF1, FZD8, TIAM1, UBC, CYR61, ADAM9, CHUK, RASSF2, PRKCE, MEF2D, PDE8A, MADD, AKAP13, NRAS, KISS1, KITLG, SMAD4, TRIM5, KRAS, IKBKG, MAGED1, TAB3, PRKAA1, SEMA7A, FOXM1, STK40, PAK2, MARK3, MAP2K3, S1PR2, STK10, C5AR1, FLCN, CDH2, CSPG4, TGFB1, RAPGEF1, PSMB10, DUSP10, CRKL, HRAS, PTPRJ, EFNA1, RPS27A, EZR, APIP, CDK1, HMGCR, MAPK12, HSF1, IRAK2, PDGFRB, NENF, TIMP3,…	PSMD5, ZNF675, DVL3, PDGFD, NRK, PSMD12, PDCD10, GDF11, MAP2K4, ZMYND11, EIF2AK2, VRK2, UBE2N, LYN, RASA1, PSMA1, RASGRF1, PDGFRA, PSMC6, HSPH1, PSMA4, ATP6AP2, TAB2, CALM2, ARL6IP5, SDCBP, DNAJC27, AIDA, MAP3K20, DNAJA1, FBXW7, EGFR, RAP1B, MBIP, HIPK3, MAPK8, IQGAP3, OXTR, LAMTOR3, FGF13, GPS2, MAP3K21, IQGAP1, SYNJ2BP, JAK1, STK3, PSMD14, PIK3CB, RGS2, RAPGEF2, HACD3, SHC1, C5, TAOK3, MED1, RY…
GO:0009605	response to external stimulus	963	31	21.24	51	0.01956	0.01956	1	1	Any process that results in a change in state or activity of a cell or an organism (in terms of movement, secretion, enzyme production, gene expression, etc.) as a result of an external stimulus	1.05982	-1.42143	CARD9, PSMA6, SKP2, CERS2, PSPN, POLR3K, PIK3C2B, SSTR1, ARHGAP35, TIAM1, CDK19, MTHFR, PSPH, CREBZF, PREX1, GFI1, CYR61, ADAM9, IFNGR2, PALM3, MTPN, CHUK, PRKCE, SLC27A4, PPM1F, AP3D1, HIST1H2BJ, DCTPP1, SBNO2, NRAS, VAV2, RPS19, SYT11, LAMA2, ANKRD23, NOTCH1, SEMA6C, TSPO, SMAD4, CBL, SCRIB, LDLR, MECP2, TRIM5, KRAS, IKBKG, HTT, PRKAA1, SEMA7A, ROMO1, FAM129B, SZT2, AKR1C3, XIAP, RMI1, POLR3G, …	HAT1, OMA1, XPR1, RPL39, PDGFD, NOV, NFE2L2, COL11A1, WDR35, CREB1, PIK3R1, HPSE, SIN3A, ADNP, MAP2K4, GPAM, EIF2AK2, STAT1, BNIP3L, DNM1L, LY96, USP14, TMF1, PPP2R3C, LYN, AKIRIN2, EIF2A, DDX21, SNX3, SPX, ENAH, COL3A1, NCK1, PUM2, MBD2, TNFRSF11B, PDGFRA, TBC1D23, GPRC5B, GCH1, SBDS, STC2, WIPF1, DHX36, CALM2, OAS3, OPHN1, AC068234.1, FAM111A, IVNS1ABP, BCHE, EGFR, TPT1, SNX4, IFIT5, AGTR1, CCD…
GO:0051439	regulation of ubiquitin-protein ligase a...	71	5	1.57	52	0.01997	0.01997	1	1	A cell cycle process that modulates the frequency, rate or extent of ubiquitin ligase activity that contributes to the mitotic cell cycle	0.644813	-0.942602	PSMA6, ANAPC7, UBC, ANAPC2, ANAPC11, PSMB10, RPS27A, CDK1, PSMA7	PSMD5, PSMD12, PSMA1, ANAPC10, PSMC6, CDC23, PSMA4, PSMD14, CDC27, PSMD6, UBE2E1, PSMD7
GO:0015031	protein transport	1359	41	29.98	2062	0.02046	0.46684	1	1	The directed movement of proteins into, out of or within a cell, or between cells, by means of some agent such as a transporter or pore	0.921516	-1.52854	IPO4, SNAP29, SYTL3, CDC40, MAK, PBLD, TOM1, RPSA, TIAM1, TSNAX, LIN7C, SPIRE2, ADAM9, RPL31, RAB26, NEURL1B, CHUK, PRKCE, IFI27, HOOK3, AP3D1, SUFU, RPS10, WDR33, STX16, ZNF593, SNX8, RPS21, TBC1D14, NDFIP2, RPS19, KPNA6, DGKD, SYT11, GGA2, SAR1B, MYO5A, ARFIP1, TNPO2, SNX19, NOTCH1, DNAJC19, THRA, ENTR1, TOMM5, TSPO, TAP2, RAB11FIP5, SMAD4, SCRIB, STXBP3, DNLZ, SUPT6H, MIDN, STX18, RPL10, UQCC2…	UBE2D3, EXOC5, PPT1, SLU7, SRP19, CD58, RPL39, LYPLA1, NOV, TNPO1, SEC31A, RPGR, SCAMP1, SNX13, WDR35, COG5, PIK3R1, RABGAP1L, TMEM167A, GPAM, FMN2, HSP90AA1, RPL15, YWHAZ, BNIP3L, DNM1L, LYN, IFT74, SNX2, VPS37A, SNX14, CSNK2A2, KDELR3, VPS36, PEX3, WDR75, TOMM20, SEC61A2, SNX3, NPEPPS, SFT2D1, NUPL2, NPM1, NCOA4, MON2, VTA1, NUP35, RAB11A, NUP54, PRNP, AP3B1, CHMP2B, CADM1, AP3M1, XPOT, KPNA3, …
GO:0034660	ncRNA metabolic process	484	18	10.68	3384	0.02057	0.99504	1	1	The chemical reactions and pathways involving non-coding RNA transcripts (ncRNAs)	1.01519	-1.25993	NSUN5P2, EXOSC6, GTF2A1, CCNK, OSGEP, TRUB1, C1D, PNPT1, CDK9, RPSA, POP1, RPL31, RPS10, RPS21, NSUN5P1, TAF8, RPS19, LAGE3, DHX37, RNASEK, RPL10, RPL41, RPS8, RPS29, BRF1, CTU1, RPS12, NPM3, NSUN5, RPL21, RPL35A, POU2F1, SNAPC1, RRNAD1, RPL37A, FCF1, HRAS, INTS2, RPLP2, TSEN54, RPS27A, SARS2, UTP11, GTPBP3, RPL34, TRMT10A, RPS23, NHP2, TARBP2, BOP1, GTF3C1, NSUN6, CD3EAP, XRN1, PHAX, DDX49, ELL,…	RPL39, MTREX, RPF1, INTS8, TAF5, MPHOSPH10, DIS3, UTP3, INTS6, RPL15, GTF2B, INTS7, TSEN15, WDR75, MRPL1, DDX21, IARS, ALKBH8, EEF1E1, NOP58, TAF9, GTF2F2, PUS7L, SBDS, RARS, NIFK, ELL2, DARS2, HEATR1, RRP15, WARS2, RTRAF, GTF2E1, EXOSC3, LCMT2, THUMPD1, MRPS9, RPL36A, DUS4L, TRMT61B, PRKRA, TRMT11, GARS, ALKBH1, SSB, DDX17, BMT2, MAK16, INTS12, UTP4, NOL11, TARS, UTP15, OSGEPL1, FRG1, RPL17-C18o…
GO:0071103	DNA conformation change	185	9	4.08	53	0.02123	0.02123	1	1	A cellular process that results in a change in the spatial configuration of a DNA molecule. A conformation change can bend DNA, or alter the, twist, writhe, or linking number of a DNA molecule	0.858042	-1.27334	KAT6A, IPO4, H3F3A, GTF2H3, UBC, BAHD1, HIST1H2BJ, GINS1, TNRC18, DNA2, H1FX, KAT6B, TOP2A, TSPYL4, MCM2, HHEX, SPTY2D1, KNL1, RPS27A, SIRT6, CHMP1A, CDK1, RTEL1, NAP1L4, MIS18BP1, PHF13, HJURP, TWNK, RECQL5, MCM3, HIST1H1C, RAD54L, H1F0, UBN1, NCAPH2	POT1, CETN2, HAT1, ITGB3BP, CENPQ, NUSAP1, NAP1L1, NPM1, CENPI, GTF2H1, SMC4, SRPK1, SET, RBBP4, HIST2H2BE, SUPV3L1, HMGB3, CENPK, CENPU, HMGA2, NCAPG, CHD1
GO:0008104	protein localization	1770	51	39.04	2083	0.02171	0.47529	1	1	Any process in which a protein is transported to, or maintained in, a specific location	1.11168	-1.77861	FAM126A, AKAP10, IPO4, MZT1, KIF14, SNAP29, TAX1BP3, SYTL3, CDC40, MAK, PBLD, TOM1, RPSA, TIAM1, TLN2, TSNAX, TAF3, LIN7C, TUB, SPIRE2, ADAM9, RPL31, RAB26, NEURL1B, LAMTOR4, CHUK, LTBP1, PRKCE, IFI27, HOOK3, AP3D1, SUFU, CCNE2, MRAP, RPS10, WDR33, STX16, ZNF593, SNX8, RPS21, TBC1D14, NRAS, TAF8, NDFIP2, RPS19, KPNA6, WRAP53, DGKD, CRIPT, SYT11, GGA2, SAR1B, MYO5A, ARFIP1, TNPO2, SNX19, NOTCH1, D…	POT1, NEDD1, ITGB1, UBE2D3, EXOC5, PPT1, SLU7, TERF2IP, SRP19, CD58, MTBP, DVL3, RPL39, LYPLA1, NOV, TNPO1, SEC31A, RPGR, SCAMP1, SNX13, WDR35, CEP55, COG5, PIK3R1, RHOQ, RABGAP1L, TMEM167A, SIN3A, KIAA0586, CENPQ, CPE, GPAM, FMN2, HSP90AA1, RPL15, YWHAZ, REEP1, BNIP3L, DNM1L, LYN, IFT74, SNX2, VPS37A, SNX14, CSNK2A2, KDELR3, TMEM59, VPS36, PEX3, RTN4, WDR75, TOMM20, SEC61A2, SNX3, NPEPPS, SFT2D1…
GO:0006091	generation of precursor metabolites and ...	249	11	5.49	1989	0.02193	0.44727	1	1	The chemical reactions and pathways resulting in the formation of precursor metabolites, substances from which energy is derived, and any process involved in the liberation of energy from these substances	0.829261	-0.924168	PPP1R3D, D2HGDH, PNPT1, NDUFA11, THTPA, UQCRHL, UBC, NDUFA2, PYGB, NDUFB2, PFKFB4, MECP2, UQCC2, PRKAA1, STK40, NDUFA9, GSK3B, UQCRQ, NDUFB6, COX10, STBD1, RPS27A, SIRT6, CDK1, HIF1A, OGDH, TBRG4, TAZ, IRS1, FDXR, C1QTNF2, SURF1, IMMP2L	UGP2, UQCRB, FASTKD3, MSH2, NDUFS1, CALM2, AP003108.2, ALDH5A1, ATP5F1C, IDH3A, PMPCB, NDUFA12, GFPT1, PPP1R3E, NNT, GYG1, BPGM, PDHB, ETFDH, NOA1, SLC25A13, NDUFB1, FASTKD2, PPP1CC, GAPDH, COX20, PANK2, SDHD, NDUFA6, AK9, PGM2, PYGL, DLD
GO:0002041	intussusceptive angiogenesis	1	1	0.02	55	0.02206	0.02206	1	1	The formation of new blood vessels as a result of the insertion and extension of lumenal tissue pillars	0.792564	0.792564	CYR61
GO:0006193	ITP catabolic process	1	1	0.02	56	0.02206	0.02206	1	1	The chemical reactions and pathways resulting in the breakdown of ITP, inosine (5'-)triphosphate	0.56199	0.56199	ITPA
GO:0006253	dCTP catabolic process	1	1	0.02	57	0.02206	0.02206	1	1	The chemical reactions and pathways resulting in the breakdown of dCTP, deoxycytidine triphosphate	0.708568	0.708568	DCTPP1
GO:0006726	eye pigment biosynthetic process	1	1	0.02	58	0.02206	0.02206	1	1	The chemical reactions and pathways resulting in the formation of eye pigments, any general or particular coloring matter in living organisms, found or utilized in the eye	0.729337	0.729337	AP3D1
GO:0009149	pyrimidine nucleoside triphosphate catab...	1	1	0.02	59	0.02206	0.02206	1	1	The chemical reactions and pathways resulting in the breakdown of pyrimidine nucleoside triphosphate, a compound consisting of a pyrimidine base linked to a ribose or deoxyribose sugar esterified with triphosphate on the sugar	0.708568	0.708568	DCTPP1
GO:0009203	ribonucleoside triphosphate catabolic pr...	1	1	0.02	60	0.02206	0.02206	1	1	The chemical reactions and pathways resulting in the breakdown of a ribonucleoside triphosphate, a compound consisting of a nucleobase linked to a ribose sugar esterified with triphosphate on the sugar	0.56199	0.56199	ITPA
GO:0009207	purine ribonucleoside triphosphate catab...	1	1	0.02	61	0.02206	0.02206	1	1	The chemical reactions and pathways resulting in the breakdown of purine ribonucleoside triphosphate, a compound consisting of a purine base linked to a ribose sugar esterified with triphosphate on the sugar	0.56199	0.56199	ITPA
GO:0009213	pyrimidine deoxyribonucleoside triphosph...	1	1	0.02	62	0.02206	0.02206	1	1	The chemical reactions and pathways resulting in the breakdown of pyrimidine deoxyribonucleoside triphosphate, a compound consisting of a pyrimidine base linked to a deoxyribose sugar esterified with triphosphate on the sugar	0.708568	0.708568	DCTPP1
GO:0009443	pyridoxal 5'-phosphate salvage	1	1	0.02	63	0.02206	0.02206	1	1	Any process that generates pyridoxal 5'-phosphate, the active form of vitamin B6, from derivatives of it without de novo synthesis	0.711151	0.711151	PDXK
GO:0014011	Schwann cell proliferation involved in a...	1	1	0.02	64	0.02206	0.02206	1	1	The multiplication or reproduction of Schwann cells by cell division, resulting in the expansion of their population in response to an axonal lesion. The newly generated Schwann cells support subsequent axon regeneration in the peripheral nervous system	1.14712	1.14712	CERS2
GO:0014809	regulation of skeletal muscle contractio...	1	1	0.02	65	0.02206	0.02206	1	1	Any process that modulates the frequency, rate or extent of skeletal muscle contraction via the regulation of the release of sequestered calcium ion by sarcoplasmic reticulum into cytosol. The sarcoplasmic reticulum is the endoplasmic reticulum of striated muscle, specialised for the sequestration of calcium ions that are released upon receipt of a signal relayed by the T tubules from the neuromu…	0.470322	0.470322	GSTO1
GO:0014810	positive regulation of skeletal muscle c...	1	1	0.02	66	0.02206	0.02206	1	1	Any process that activates, maintains or increases the frequency, rate or extent of skeletal muscle contraction via the regulation of the release of sequestered calcium ion by sarcoplasmic reticulum into cytosol. The sarcoplasmic reticulum is the endoplasmic reticulum of striated muscle, specialised for the sequestration of calcium ions that are released upon receipt of a signal relayed by the T …	0.470322	0.470322	GSTO1
GO:0016182	synaptic vesicle budding from endosome	1	1	0.02	67	0.02206	0.02206	1	1	Budding of synaptic vesicles during the formation of constitutive recycling vesicles from early endosomes	0.729337	0.729337	AP3D1
GO:0021541	ammon gyrus development	1	1	0.02	68	0.02206	0.02206	1	1	The process whose specific outcome is the progression of the ammon gyrus over time, from its formation to the mature structure. The ammon gyrus, often subdivided into the CA1 and CA3 regions, is one of the two interlocking gyri of the hippocampus that is rich in large pyramidal neurons	1.50133	1.50133	LRP8
GO:0021684	cerebellar granular layer formation	1	1	0.02	69	0.02206	0.02206	1	1	The process that gives rise to the cerebellar granule layer. This process pertains to the initial formation of a structure from unspecified parts. The granular layer is the innermost layer of the cerebellar cortex. This layer contains densely packed small neurons, mostly granule cells. Some Golgi cells are found at the outer border. Granule neurons send parallel fibers to the upper molecular laye…	0.765992	0.765992	MTPN
GO:0021707	cerebellar granule cell differentiation	1	1	0.02	70	0.02206	0.02206	1	1	The process in which neuroblasts acquire specialized structural and/or functional features that characterize the mature cerebellar granule cell. Differentiation includes the processes involved in commitment of a neuroblast to a granule cell fate. A granule cell is a glutamatergic interneuron found in the cerebellar cortex	0.765992	0.765992	MTPN
GO:0030472	mitotic spindle organization in nucleus	1	1	0.02	71	0.02206	0.02206	1	1	A process resulting in the assembly, arrangement of constituent parts, or disassembly of the microtubule spindle in the nucleus. The process occurs during a mitotic cell cycle and takes place at the cellular level	0.545841	0.545841	PTPA
GO:0031038	myosin II filament organization	1	1	0.02	72	0.02206	0.02206	1	1	A process that is carried out at the cellular level which results in the assembly, arrangement of constituent parts, or disassembly of a bipolar filament composed of myosin II molecules	0.640361	0.640361	DAPK3
GO:0032203	telomere formation via telomerase	1	1	0.02	73	0.02206	0.02206	1	1	The addition of telomeric repeats to a non-telomeric double-stranded DNA end by telomerase	0.678214	0.678214	WRAP53
GO:0034337	RNA folding	1	1	0.02	74	0.02206	0.02206	1	1	The process of assisting in the covalent and noncovalent assembly of single or multimeric RNAs into the correct tertiary structure	0.612157	0.612157	FAM129B
GO:0035105	sterol regulatory element binding protei...	1	1	0.02	75	0.02206	0.02206	1	1	The transfer of a sterol regulatory element binding protein (SREBP) into the nucleus, across the nuclear membrane, in response to altered levels of one or more lipids. SREBPs are transcription factors that bind sterol regulatory elements (SREs), DNA motifs found in the promoters of target genes	0.519213	0.519213	LMNA
GO:0035582	sequestering of BMP in extracellular mat...	1	1	0.02	76	0.02206	0.02206	1	1	Confining a bone morphogenetic protein (BMP) to the extracellular matrix (ECM), such that it is separated from other components of the signaling pathway, including its cell surface receptor. Bone morphogenetic proteins (BMPs) are secreted as homodimers, non-covalently associated with N-terminal pro-peptides, and are targeted to the extracellular matrix through interaction with matrix proteins	0.500312	0.500312	NBL1
GO:0038098	sequestering of BMP from receptor via BM...	1	1	0.02	77	0.02206	0.02206	1	1	Binding to a bone morphogenetic protein (BMP) in the extracellular region, and inhibiting BMP signaling by preventing BMP from binding to its cell surface receptor	0.500312	0.500312	NBL1
GO:0042441	eye pigment metabolic process	1	1	0.02	78	0.02206	0.02206	1	1	The chemical reactions and pathways involving eye pigments, any general or particular coloring matter in living organisms, found or utilized in the eye	0.729337	0.729337	AP3D1
GO:0043324	pigment metabolic process involved in de...	1	1	0.02	79	0.02206	0.02206	1	1	The chemical reactions and pathways involving biological pigments e.g. melanin, occurring as part of the development of an organ or organism	0.729337	0.729337	AP3D1
GO:0043474	pigment metabolic process involved in pi...	1	1	0.02	80	0.02206	0.02206	1	1	The chemical reactions and pathways involving a pigment, any general or particular coloring matter in living organisms, resulting in the deposition or aggregation of pigment in an organism, tissue or cell	0.729337	0.729337	AP3D1
GO:0043519	regulation of myosin II filament organiz...	1	1	0.02	81	0.02206	0.02206	1	1	Any process that modulates the frequency, rate or extent of the assembly, arrangement of constituent parts, or disassembly of a bipolar filament composed of myosin II molecules	0.640361	0.640361	DAPK3
GO:0044028	DNA hypomethylation	1	1	0.02	82	0.02206	0.02206	1	1	An decrease in the epigenetic methylation of cytosine and adenosine residues in DNA	0.612157	0.612157	FAM129B
GO:0044029	hypomethylation of CpG island	1	1	0.02	83	0.02206	0.02206	1	1	An decrease in the epigenetic methylation of cytosine and adenosine residues in a CpG island in DNA. CpG islands are genomic regions that contain a high frequency of the CG dinucleotide and are often associated with the transcription start site of genes	0.612157	0.612157	FAM129B
GO:0045013	carbon catabolite repression of transcri...	1	1	0.02	84	0.02206	0.02206	1	1	A transcription regulation process in which the presence of one carbon source leads to a decrease in the frequency, rate, or extent of transcription of specific genes involved in the metabolism of other carbon sources. Carbon catabolite repression is a mechanism of genetic regulation which the accumulation of catabolites of one substance in the cell represses the formation of enzymes that contrib…	0.476335	0.476335	CHMP1A
GO:0045014	negative regulation of transcription by ...	1	1	0.02	85	0.02206	0.02206	1	1	Any process involving glucose that stops, prevents or reduces the rate of transcription. The presence of glucose in the growth medium inhibits the synthesis of certain enzymes in bacteria growing on the medium. For example, transcription of some catabolic operons is under negative control by specific repressors and glucose is an anti-inducer of xylose utilization and glycerol kinase	0.476335	0.476335	CHMP1A
GO:0046065	dCTP metabolic process	1	1	0.02	86	0.02206	0.02206	1	1	The chemical reactions and pathways involving dCTP, deoxycytidine triphosphate	0.708568	0.708568	DCTPP1
GO:0046521	sphingoid catabolic process	1	1	0.02	87	0.02206	0.02206	1	1	The chemical reactions and pathways resulting in the breakdown of sphingoids, any of a class of compounds comprising sphinganine and its homologues and stereoisomers, and derivatives of these compounds	0.614314	0.614314	SPHK1
GO:0048499	synaptic vesicle membrane organization	1	1	0.02	88	0.02206	0.02206	1	1	A process that is carried out at the cellular level which results in the assembly, arrangement of constituent parts, or disassembly of the membrane surrounding a synaptic vesicle	0.729337	0.729337	AP3D1
GO:0060112	generation of ovulation cycle rhythm	1	1	0.02	89	0.02206	0.02206	1	1	The process which controls the timing of the type of sexual cycle seen in female mammals	0.686955	0.686955	KISS1
GO:0060265	positive regulation of respiratory burst...	1	1	0.02	90	0.02206	0.02206	1	1	Any process that increases the rate, frequency or extent of a phase of elevated metabolic activity, during which oxygen consumption increases made as a defense response ; this leads to the production, by an NADH dependent system, of hydrogen peroxide (H2O2), superoxide anions and hydroxyl radicals	0.682527	0.682527	RPS19
GO:0060741	prostate gland stromal morphogenesis	1	1	0.02	91	0.02206	0.02206	1	1	The process in which the prostate gland stroma is generated and organized. The prostate gland stroma is made up of the mesenchymal or fibroblast cells of the prostate gland	1.4011	1.4011	AL928654.3
GO:0061034	olfactory bulb mitral cell layer develop...	1	1	0.02	92	0.02206	0.02206	1	1	The progression of the olfactory bulb mitral cell layer over time from its initial formation until its mature state. The mitral cell layer is composed of pyramidal neurons whose cell bodies are located between the granule cell layer and the plexiform layer	0.439023	0.439023	OGDH
GO:0061408	positive regulation of transcription fro...	1	1	0.02	93	0.02206	0.02206	1	1	Any process that increases the frequency, rate or extent of transcription from an RNA polymerase II promoter as a result of a heat stimulus, a temperature stimulus above the optimal temperature for that organism	0.461005	0.461005	HSF1
GO:0061519	macrophage homeostasis	1	1	0.02	94	0.02206	0.02206	1	1	The process of regulating the proliferation and elimination of macrophage cells such that the total number of myeloid cells within a whole or part of an organism is stable over time in the absence of an outside stimulus	0.505957	0.505957	BAP1
GO:0070510	regulation of histone H4-K20 methylation	1	1	0.02	95	0.02206	0.02206	1	1	Any process that modulates the frequency, rate or extent of the covalent addition of a methyl group to the lysine at position 20 of histone H4	0.723953	0.723953	BRCA1
GO:0070512	positive regulation of histone H4-K20 me...	1	1	0.02	96	0.02206	0.02206	1	1	Any process that activates or increases the frequency, rate or extent of the covalent addition of a methyl group to the lysine at position 20 of histone H4	0.723953	0.723953	BRCA1
GO:0071105	response to interleukin-11	1	1	0.02	97	0.02206	0.02206	1	1	Any process that results in a change in state or activity of a cell or an organism (in terms of movement, secretion, enzyme production, gene expression, etc.) as a result of an interleukin-11 stimulus	0.703157	0.703157	SBNO2
GO:0071348	cellular response to interleukin-11	1	1	0.02	98	0.02206	0.02206	1	1	Any process that results in a change in state or activity of a cell (in terms of movement, secretion, enzyme production, gene expression, etc.) as a result of an interleukin-11 stimulus	0.703157	0.703157	SBNO2
GO:0098943	neurotransmitter receptor transport, pos...	1	1	0.02	99	0.02206	0.02206	1	1		0.729337	0.729337	AP3D1
GO:0098968	neurotransmitter receptor transport post...	1	1	0.02	100	0.02206	0.02206	1	1		0.636572	0.636572	SCRIB
GO:0099532	synaptic vesicle endosomal processing	1	1	0.02	101	0.02206	0.02206	1	1		0.729337	0.729337	AP3D1
GO:1900148	negative regulation of Schwann cell migr...	1	1	0.02	102	0.02206	0.02206	1	1	Any process that stops, prevents or reduces the frequency, rate or extent of Schwann cell migration	1.14712	1.14712	CERS2
GO:1900365	positive regulation of mRNA polyadenylat...	1	1	0.02	103	0.02206	0.02206	1	1	Any process that activates or increases the frequency, rate or extent of mRNA polyadenylation	0.461005	0.461005	HSF1
GO:1902296	DNA strand elongation involved in cell c...	1	1	0.02	104	0.02206	0.02206	1	1	Any DNA strand elongation that is involved in cell cycle DNA replication	0.67247	0.67247	GINS1
GO:1902319	DNA strand elongation involved in nuclea...	1	1	0.02	105	0.02206	0.02206	1	1	Any DNA strand elongation that is involved in nuclear cell cycle DNA replication	0.67247	0.67247	GINS1
GO:1902983	DNA strand elongation involved in mitoti...	1	1	0.02	106	0.02206	0.02206	1	1	Any DNA strand elongation involved in mitotic cell cycle DNA replication	0.67247	0.67247	GINS1
GO:1904842	response to nitroglycerin	1	1	0.02	107	0.02206	0.02206	1	1		0.461005	0.461005	HSF1
GO:1904843	cellular response to nitroglycerin	1	1	0.02	108	0.02206	0.02206	1	1		0.461005	0.461005	HSF1
GO:1904844	response to L-glutamine	1	1	0.02	109	0.02206	0.02206	1	1		0.461005	0.461005	HSF1
GO:1904845	cellular response to L-glutamine	1	1	0.02	110	0.02206	0.02206	1	1		0.461005	0.461005	HSF1
GO:1905044	regulation of Schwann cell proliferation...	1	1	0.02	111	0.02206	0.02206	1	1		1.14712	1.14712	CERS2
GO:1905045	negative regulation of Schwann cell prol...	1	1	0.02	112	0.02206	0.02206	1	1		1.14712	1.14712	CERS2
GO:1905572	ganglioside GM1 transport to membrane	1	1	0.02	113	0.02206	0.02206	1	1		0.45055	0.45055	PSAP
GO:1990823	response to leukemia inhibitory factor	1	1	0.02	114	0.02206	0.02206	1	1		0.703157	0.703157	SBNO2
GO:1990830	cellular response to leukemia inhibitory...	1	1	0.02	115	0.02206	0.02206	1	1		0.703157	0.703157	SBNO2
GO:1990911	response to psychosocial stress	1	1	0.02	116	0.02206	0.02206	1	1		0.461005	0.461005	HSF1
GO:2000620	positive regulation of histone H4-K16 ac...	1	1	0.02	117	0.02206	0.02206	1	1	Any process that activates or increases the frequency, rate or extent of histone H4-K16 acetylation	0.723953	0.723953	BRCA1
GO:0030902	hindbrain development	73	5	1.61	943	0.02225	0.18561	1	1	The process whose specific outcome is the progression of the hindbrain over time, from its formation to the mature structure. The hindbrain is the posterior of the three primary divisions of the developing chordate brain, or the corresponding part of the adult brain (in vertebrates, includes the cerebellum, pons, and medulla oblongata and controls the autonomic functions and equilibrium)	0.730738	-0.777213	KIF14, SOCS7, SSTR1, MTPN, SCRIB, MECP2, CDK5R1, GATA2, C5AR1, UQCRQ, CKB, OGDH, HSPA5, MAP2K1, GSX2	ITGB1, AGTPBP1, PSMG1, SEC24B, ARCN1, HNRNPD, LDB1, NCOA1, LEF1, MYH10, SMAD1
GO:0000381	regulation of alternative mRNA splicing,...	28	3	0.62	118	0.02309	0.02309	1	1	Any process that modulates the frequency, rate or extent of alternative splicing of nuclear mRNAs	0.282533	-0.720917	PTBP1, THRAP3, RBM5	DYRK1A, RBM7, RBM25, DDX5, DDX17, FMR1, RBMX, SREK1, AC009690.3, TRA2B
GO:0017004	cytochrome complex assembly	28	3	0.62	119	0.02309	0.02309	1	1	The aggregation, arrangement and bonding together of a cytochrome complex. A cytochrome complex is a protein complex in which at least one of the proteins is a cytochrome, i.e. a heme-containing protein involved in catalysis of redox reactions	0.399011	-0.254313	PET100, UQCC2, COX14, COX10, SURF1	UQCRB, COX20
GO:0099637	neurotransmitter receptor transport	11	2	0.24	120	0.02336	0.02336	1	1		0.111875	-0.0511896	AP3D1, SCRIB, ARHGAP44	RAB11A, RAB8A
GO:1902855	regulation of non-motile cilium assembly	11	2	0.24	121	0.02336	0.02336	1	1	Any process that modulates the frequency, rate or extent of nonmotile primary cilium assembly	0.227355	0.0948552	MAK, SEPT9, CEP135, MAP4	SEPT7
GO:0051437	positive regulation of ubiquitin-protein...	74	5	1.63	122	0.02345	0.02345	1	1	Any process that activates, maintains or increases the rate of ubiquitin ligase activity that contributes to the mitotic cell cycle	0.644813	-0.942602	PSMA6, ANAPC7, UBC, ANAPC2, ANAPC11, PSMB10, RPS27A, CDK1, PSMA7	PSMD5, PSMD12, PSMA1, ANAPC10, PSMC6, CDC23, PSMA4, PSMD14, CDC27, PSMD6, UBE2E1, PSMD7
GO:0006996	organelle organization	2624	71	57.88	881	0.02462	0.17732	1	1	A process that is carried out at the cellular level which results in the assembly, arrangement of constituent parts, or disassembly of an organelle within a cell. An organelle is an organized structure of distinctive morphology and function. Includes the nucleus, mitochondria, plastids, vacuoles, vesicles, ribosomes and the cytoskeleton. Excludes the plasma membrane	1.31485	-1.89854	MIGA1, TUBB2A, PEX11A, PHC1, KAT6A, IPO4, ATAD2B, MZT1, FTCD, KIF14, VPS13C, SNAP29, CCNK, ARHGAP18, GAS2L3, PIK3C2B, H3F3A, VILL, SYTL3, GTF2H3, SSH2, TPGS1, PRKAR2B, PI4K2B, CDYL, SOD2, C21orf2, PNPT1, ARHGAP35, MAK, NDUFA11, DYM, CDK9, RPSA, HIST1H2AG, TLN2, MTHFR, ANAPC7, UBC, BAHD1, TAF9B, PREX1, SPIRE2, REC8, GFI1, DSCC1, CDC42BPB, DOCK1, BIRC6, CEP126, MTPN, HIRIP3, BIN1, FCHSD2, RPA3, COB…	POT1, NEDD1, ITGB1, GEM, ATP2C1, CETN2, DNAJC28, POLE2, HAT1, UBE2D3, PPT1, OMA1, TERF2IP, MTBP, SUPT3H, EPC1, ACTR6, RNF2, TNPO1, SEC31A, PDCD10, CCNG1, RPF1, RPGR, SMC6, WDR35, YEATS4, TRAPPC6B, BRIX1, CREB1, TAF5, ABCC4, PIK3R1, RHOQ, ARPC5, RABGAP1L, SIN3A, BAZ2A, ITGB3BP, UTP3, KIAA0586, CENPQ, CAMSAP2, PRIM1, PFN2, ZBTB1, ZMYND11, FMN2, SLC25A46, HSP90AA1, ABRAXAS2, UQCRB, BUB1, YWHAZ, PTGE…
GO:0032392	DNA geometric change	75	5	1.65	123	0.02469	0.02469	1	1	The process in which a transformation is induced in the geometry of a DNA double helix, resulting in a change in twist, writhe, or both, but with no change in linking number. Includes the unwinding of double-stranded DNA by helicases	0.580055	-0.766494	GTF2H3, UBC, GINS1, DNA2, MCM2, RPS27A, RTEL1, TWNK, RECQL5, MCM3, RAD54L	POT1, CETN2, GTF2H1, SUPV3L1, HMGB3, CHD1
GO:1904667	negative regulation of ubiquitin protein...	75	5	1.65	124	0.02469	0.02469	1	1		0.644813	-0.942602	PSMA6, ANAPC7, UBC, ANAPC2, ANAPC11, PSMB10, RPS27A, CDK1, PSMA7	PSMD5, PSMD12, PSMA1, ANAPC10, PSMC6, CDC23, PSMA4, PSMD14, CDC27, PSMD6, UBE2E1, PSMD7
GO:0009205	purine ribonucleoside triphosphate metab...	190	9	4.19	2616	0.02472	0.63768	1	1	The chemical reactions and pathways involving purine ribonucleoside triphosphate, a compound consisting of a purine base linked to a ribose sugar esterified with triphosphate on the sugar	0.700056	-0.984715	NDUFA11, UQCRHL, NDUFA2, NDUFB2, NME3, FIGNL1, PFKFB4, TSPO, MECP2, UQCC2, PRKAA1, NDUFA9, IMPDH1, ITPA, FLCN, UQCRQ, TGFB1, NDUFB6, COX10, SIRT6, PARG, CDK1, HIF1A, OGDH, TAZ, SURF1	ATP5F1EP2, RHOQ, UQCRB, DNM1L, MSH2, NDUFS1, AP003108.2, ATP5F1C, MOCS2, MBIP, PMPCB, AK3, NDUFA12, BPGM, SLC25A13, NFS1, HSPA8, NDUFB1, GAPDH, SDHD, NDUFA6, AK9, NME7, NDUFAF7, NMNAT1, DLD
GO:0006643	membrane lipid metabolic process	130	7	2.87	2165	0.02479	0.49914	1	1	The chemical reactions and pathways involving membrane lipids, any lipid found in or associated with a biological membrane	0.959712	-0.858836	SPNS2, ITGB8, CERS2, ARSI, CYR61, DEGS1, PRKAA1, SPHK1, CSNK1G2, ST3GAL5, PIGW, PIGQ, A4GALT, ALDH3A2, ORMDL3, PSAP, GAL3ST4, POGLUT1, NEU3, CLN6, DEGS2	PPT1, PRKD3, ARSK, ALDH5A1, PIGC, VAPA, DPM1, PLPP1, SERINC3, SPTSSA, PIGP, CERKL, CTSA, HACD2, UGCG, AGK, SAMD8, PIGU, PIGS, CYP1B1, KDELC2, PIGB, PIGX
GO:0009056	catabolic process	1541	45	33.99	2856	0.02554	0.71795	1	1	The chemical reactions and pathways resulting in the breakdown of substances, including the breakdown of carbon compounds with the liberation of energy for use by the cell or organism	1.1293	-1.62032	ACAD11, PSMA6, SKP2, EGLN2, EXOSC6, RNF6, FTCD, PNPLA7, KIF14, VPS13C, GPC2, SNAP29, PIK3C2B, PPP1R3D, PNPT1, RPSA, ACBD5, ANAPC7, UBC, POP1, ADAM9, RPL31, LAMTOR4, PRKCE, SLC27A4, SOCS4, PDE8A, SUFU, TNRC6B, RPS10, DCTPP1, PTPN3, UBXN2A, RPS21, TBC1D14, TET2, RNF166, RPS19, PYGB, THRA, UFL1, TOMM5, PFKFB4, TSPO, ANAPC2, DAPK3, CBL, MDM4, LDLR, POMT2, GGT7, TRIM5, FBXL19, IKBKG, EDC3, HTT, ZHX2, …	ITGB1, PSMD5, UBE2D3, PPT1, OMA1, RPL39, LYPLA1, RNASEH2B, MTREX, GSPT1, UCHL5, NFE2L2, EIF3E, COL11A1, PSMD12, USP25, TENT2, USP38, PAIP1, AZIN1, HPSE, GPD2, DIS3, GSPT2, FMN2, HSP90AA1, RPL15, BNIP3L, LIPA, DNM1L, TMTC3, USP14, UBE2N, TMF1, TATDN1, VPS37A, RFFL, SNX14, HMMR, CSNK2A2, TMEM59, VPS36, DRAM2, PSMA1, USP9Y, ANAPC10, WDR75, LUM, TOMM20, SNX3, ZMPSTE24, NPEPPS, TRIM13, SMURF2, SUMO1, …
GO:0022037	metencephalon development	51	4	1.12	1265	0.02562	0.26608	1	1	The process whose specific outcome is the progression of the metencephalon over time, from its formation to the mature structure	0.650327	-0.535715	KIF14, SSTR1, MTPN, SCRIB, MECP2, CDK5R1, UQCRQ, CKB, OGDH, HSPA5, MAP2K1	AGTPBP1, SEC24B, ARCN1, HNRNPD, LDB1, NCOA1, MYH10
GO:0042775	mitochondrial ATP synthesis coupled elec...	76	5	1.68	125	0.02597	0.02597	1	1	The transfer of electrons through a series of electron donors and acceptors, generating energy that is ultimately used for synthesis of ATP, as it occurs in the mitochondrial inner membrane or chloroplast thylakoid membrane	0.639147	-0.627974	NDUFA11, UQCRHL, NDUFA2, NDUFB2, MECP2, NDUFA9, UQCRQ, NDUFB6, COX10, CDK1, TAZ	UQCRB, NDUFS1, AP003108.2, PMPCB, NDUFA12, NDUFB1, SDHD, NDUFA6, DLD
GO:1903322	positive regulation of protein modificat...	161	8	3.55	126	0.02601	0.02601	1	1	Any process that activates or increases the frequency, rate or extent of protein modification by small protein conjugation or removal	0.821025	-1.14098	PSMA6, SKP2, CDK9, ANAPC7, UBC, BRCA1, NDFIP2, ANAPC2, SPHK1, ANAPC11, XIAP, CCDC22, PSMB10, BMI1, RPS27A, TOLLIP, NDFIP1, CDK1, TICAM1, RASSF5, HSPA5, PSMA7, GORASP1	PSMD5, ARRDC3, PSMD12, UBE2N, DCUN1D5, PSMA1, ANAPC10, PSMC6, TOPORS, CDC23, UBE3A, PSMA4, FBXW7, DCUN1D4, RNF20, RAB1A, DERL1, FKBP1A, PSMD14, CDC27, PSMD6, UBE2E1, RIPK2, PSMD7, PTTG1IP, BIRC2
GO:0031401	positive regulation of protein modificat...	682	23	15.04	127	0.02673	0.02673	1	1	Any process that activates or increases the frequency, rate or extent of the covalent alteration of one or more amino acid residues within a protein	1.10457	-1.41806	LRP8, CARD9, PSMA6, FGFR3, SKP2, KIF14, CCNK, FZD8, PRKAR2B, CDK9, TIAM1, PRKAR1B, ANAPC7, UBC, CYR61, ADAM9, RASSF2, PRKCE, PDE8A, BRCA1, MADD, AKAP13, NDFIP2, KISS1, RTF1, KITLG, ANAPC2, SMAD4, MECP2, POMT2, TRIM5, CDK20, KRAS, IKBKG, MAGED1, TAB3, PRKAA1, SEMA7A, SPHK1, ANAPC11, MUC1, XIAP, CDK5R1, PAK2, MAP2K3, S1PR2, JARID2, C5AR1, MOB2, FLCN, CDH2, GSK3B, PTPA, CSPG4, TGFB1, CCDC22, RAPGEF1…	PSMD5, ARRDC3, TERF2IP, DVL3, PDGFD, NRK, PSMD12, PDCD10, GDF11, DYRK1A, ADNP, MAP2K4, PFN2, EIF2AK2, PRKACB, UBE2N, PPP2R3C, LYN, EED, DCUN1D5, PSMA1, ANAPC10, FAM129A, PDGFRA, PSMC6, PRNP, GPRC5B, TOPORS, CDC23, HSPH1, UBE3A, PSMA4, MNAT1, TAB2, CALM2, ARL6IP5, SDCBP, AC068234.1, DNAJC27, NKX3-1, PIBF1, CCNH, MAP3K20, FBXW7, EGFR, TTK, DCUN1D4, RAP1B, ISL1, RNF20, IQGAP3, RAB1A, CTF1, AREG, LAM…
GO:2001236	regulation of extrinsic apoptotic signal...	104	6	2.29	128	0.02725	0.02725	1	1	Any process that modulates the frequency, rate or extent of extrinsic apoptotic signaling pathway	0.7543	-0.705983	SKIL, SH3RF1, PIDD1, BIRC6, BRCA1, MADD, DAPK3, HTT, PAK2, CTTN, LMNA, TRADD, ITM2C, TIMP3, ATF3, BCL2L1, CYLD, HYAL2, GCLM, TGFBR1	ZMYND11, RFFL, PHIP, EYA4, LGALS3, STK3, RPS6KB1, STRADB, IL1B, BMP4, YAP1, TNFAIP3, NF1, STK4, TGFB2, ITGA6, FADD, FYN
GO:0042773	ATP synthesis coupled electron transport	77	5	1.7	129	0.02729	0.02729	1	1	The transfer of electrons through a series of electron donors and acceptors, generating energy that is ultimately used for synthesis of ATP	0.639147	-0.627974	NDUFA11, UQCRHL, NDUFA2, NDUFB2, MECP2, NDUFA9, UQCRQ, NDUFB6, COX10, CDK1, TAZ	UQCRB, NDUFS1, AP003108.2, PMPCB, NDUFA12, NDUFB1, SDHD, NDUFA6, DLD
GO:0045454	cell redox homeostasis	52	4	1.15	130	0.0273	0.0273	1	1	Any process that maintains the redox environment of a cell or compartment within a cell	0.779859	-0.724926	TMX1, EGLN2, NHLRC2, TXNDC15, TXNDC16, P4HB	NFE2L2, TXNL1, ERO1A, KRIT1, TMX3, TXNDC9, DNAJC10, PDIA6, TXNDC12, DLD
GO:0090630	activation of GTPase activity	52	4	1.15	131	0.0273	0.0273	1	1		0.601318	-0.617032	TAX1BP3, TIAM1, TBC1D14, SCRIB, PLEKHG4, RALGAPA2, TBC1D13, TBC1D9, TBC1D22A, EPHA1, RCC2	RABGAP1L, RASGRF1, TBCK, RUNDC1, EIF5, WNT5A, ECT2
GO:0000478	endonucleolytic cleavage involved in rRN...	12	2	0.26	3399	0.02763	1	1	1	Any endonucleolytic cleavage involved in the conversion of a primary ribosomal RNA (rRNA) transcript into a mature rRNA molecule. Some endonucleolytic cleavages produce the mature end, while others are a step in the process of generating the mature end from the pre-rRNA	0.316584	0.103461	RPSA, RPS21, FCF1, BOP1
GO:0000479	endonucleolytic cleavage of tricistronic...	12	2	0.26	3400	0.02763	1	1	1	Endonucleolytic cleavage of a pre-rRNA molecule originally produced as a tricistronic rRNA transcript that contains the Small SubUnit (SSU) rRNA, the 5.8S rRNA, and the Large SubUnit (LSU) rRNA, in that order, from 5' to 3' along the primary transcript. Primary ribosomal RNA transcripts with three genes, in this order, are produced in the nuclei of many eukaryotic species, including S. cerevisiae	0.316584	0.103461	RPSA, RPS21, FCF1, BOP1
GO:0034383	low-density lipoprotein particle clearan...	12	2	0.26	132	0.02763	0.02763	1	1	The process in which a low-density lipoprotein particle is removed from the blood via receptor-mediated endocytosis and its constituent parts degraded	0.298782	0.0769832	CNPY2, LDLR, CSK	HNRNPK
GO:0036010	protein localization to endosome	12	2	0.26	3401	0.02763	1	1	1	A process in which a protein is transported to, or maintained in, a location within an endosome	0.340581	0.160396	SCRIB, PACSIN2, EZR, TOLLIP, RDX, ARF6
GO:0042491	auditory receptor cell differentiation	12	2	0.26	133	0.02763	0.02763	1	1	The process in which a relatively unspecialized cell acquires specialized features of an auditory hair cell	0.407374	-0.145994	SLC4A7, NOTCH1, SCRIB	SEC24B, RBPJ
GO:0044030	regulation of DNA methylation	12	2	0.26	134	0.02763	0.02763	1	1	Any process that modulates the frequency, rate or extent of the covalent transfer of a methyl group to either N-6 of adenine or C-5 or N-4 of cytosine	0.307886	-0.0177673	BRCA1, FAM129B, MPHOSPH8, GSK3B, MBD3, KDM1B	RLF, MBD2, MBD1
GO:1902742	apoptotic process involved in developmen...	12	2	0.26	135	0.02763	0.02763	1	1	Any apoptotic process that is involved in anatomical structure development	0.320516	0.0892278	CYR61, NOTCH1, SCRIB, VDR, BAK1	TGFB2, LEF1
GO:0046580	negative regulation of Ras protein signa...	30	3	0.66	136	0.02772	0.02772	1	1	Any process that stops, prevents, or reduces the frequency, rate or extent of Ras protein signal transduction	0.398554	-0.690876	ARHGAP35, FLCN, RAPGEF1, ARHGAP44	ITGB1, RASA1, SPRY2, MET, STAMBP, NF1, TNFAIP1, TGFB2, PPP2CB, KANK1
GO:1902533	positive regulation of intracellular sig...	503	18	11.1	137	0.02886	0.02886	1	1	Any process that activates or increases the frequency, rate or extent of intracellular signal transduction	0.921521	-1.34935	CARD9, FGFR3, SKIL, FZD8, TIAM1, UBC, MC1R, ADAM9, LAMTOR4, IGFBP5, CHUK, RASSF2, PRKCE, PDE8A, S100A4, MADD, AKAP13, NDFIP2, KISS1, PLXNB1, NOTCH1, KITLG, SHOC2, RC3H2, CBL, TRIM5, KRAS, IKBKG, MAGED1, HTT, TAB3, PRKAA1, SEMA7A, SPHK1, AKR1C3, MAP2K3, S1PR2, C5AR1, FLCN, CDH2, CSPG4, GPR4, TGFB1, S100A13, CCDC22, RAPGEF1, CRKL, MAVS, HRAS, GPR17, PTPRJ, IRF3, EFNA1, RPS27A, TRADD, NDFIP1, CDK1, …	ATP2C1, TERF2IP, DVL3, PDGFD, NRK, PDCD10, HPSE, MAP2K4, EIF2AK2, DNM1L, UBE2N, LYN, RTN4, RASGRF1, EEF1E1, TRIM13, COL3A1, NCK1, PUM2, PDGFRA, GPRC5B, UBE3A, TAB2, CALM2, ARL6IP5, SDCBP, DNAJC27, NKX3-1, PIBF1, MAP3K20, SOS2, FBXW7, EGFR, IFIT5, RAP1B, VAPA, DDX5, ISL1, MTDH, MYORG, IQGAP3, MEIS3, CTF1, RRAGB, PRKRA, LAMTOR3, COPS8, MAP3K21, SERINC3, IQGAP1, NOTCH2, F2RL2, RC3H1, GREM1, STK3, AD…
GO:0071702	organic substance transport	1676	48	36.97	1952	0.02888	0.43729	1	1	The directed movement of organic substances into, out of or within a cell, or between cells, or within a multicellular organism by means of some agent such as a transporter or pore. An organic substance is a molecular entity that contains carbon	1.34789	-1.53634	SLC4A7, SPNS2, IPO4, SNAP29, SYTL3, SLC25A32, CDC40, PNPT1, MAK, PBLD, TOM1, RPSA, SLC17A5, TIAM1, TSNAX, LIN7C, SPIRE2, ADAM9, RPL31, OSBPL6, RAB26, NEURL1B, CHUK, SLC22A5, PRKCE, IFI27, HOOK3, SLC27A4, AP3D1, SUFU, PPFIA3, RPS10, WDR33, STX16, FLVCR1, ZNF593, SNX8, RPS21, TBC1D14, NDFIP2, SLC19A1, KISS1, OSBPL5, RPS19, SLC5A3, KPNA6, DGKD, SYT11, GGA2, SAR1B, MYO5A, ARFIP1, TNPO2, SNX19, NOTCH1…	UBE2D3, EXOC5, PPT1, SLU7, SRP19, CD58, RPL39, LYPLA1, LINC02210-CRHR1, NOV, NFE2L2, TNPO1, SEC31A, RPGR, SCAMP1, SNX13, WDR35, COG5, ABCC4, PIK3R1, AZIN1, RHOQ, RABGAP1L, TMEM167A, SLC22A4, GPAM, FMN2, HSP90AA1, RPL15, YWHAZ, BNIP3L, DNM1L, TMF1, LYN, IFT74, SNX2, VPS37A, SNX14, CSNK2A2, KDELR3, VPS36, PEX3, GULP1, WDR75, TOMM20, SEC61A2, SNX3, SPX, NPEPPS, ATP11C, SFT2D1, SLC25A36, NUPL2, NPM1,…
GO:0044264	cellular polysaccharide metabolic proces...	53	4	1.17	138	0.02903	0.02903	1	1	The chemical reactions and pathways involving polysaccharides, polymers of more than 10 monosaccharide residues joined by glycosidic linkages, as carried out by individual cells	0.618659	-0.599667	PPP1R3D, UBC, CSGALNACT2, PYGB, STK40, GSK3B, B4GAT1, STBD1, RPS27A, IRS1, C1QTNF2	UGP2, CALM2, HAS2, PPP1R3E, GYG1, PPP1CC, PGM2, PYGL
GO:0009199	ribonucleoside triphosphate metabolic pr...	196	9	4.32	2720	0.02943	0.66915	1	1	The chemical reactions and pathways involving a ribonucleoside triphosphate, a compound consisting of a nucleobase linked to a ribose sugar esterified with triphosphate on the sugar	0.700056	-0.984715	NDUFA11, UQCRHL, NDUFA2, NDUFB2, NME3, FIGNL1, PFKFB4, TSPO, MECP2, UQCC2, PRKAA1, NDUFA9, IMPDH1, ITPA, FLCN, UQCRQ, TGFB1, NDUFB6, UCK1, COX10, SIRT6, PARG, CDK1, HIF1A, OGDH, TAZ, SURF1	ATP5F1EP2, RHOQ, UQCRB, DNM1L, MSH2, NDUFS1, AP003108.2, ATP5F1C, MOCS2, MBIP, PMPCB, AK3, NDUFA12, BPGM, SLC25A13, NFS1, HSPA8, NDUFB1, CTPS1, GAPDH, SDHD, NDUFA6, AK9, NME7, NDUFAF7, NMNAT1, DLD
GO:0030182	neuron differentiation	652	22	14.38	371	0.02981	0.07304	1	1	The process in which a relatively unspecialized cell acquires specialized features of a neuron	1.31936	-1.35833	SLC4A7, LRP8, CERS2, SKIL, RNF6, PSPN, GPC2, EEF2K, SSH2, FZD8, ARHGAP35, TIAM1, TRPV2, PREX1, GFI1, MTPN, BIN1, HMG20A, SUFU, NRAS, PLXNB1, SDK1, LAMA2, NOTCH1, NPHP4, NCS1, SEMA6C, BLOC1S4, TSPO, ANAPC2, DAPK3, SMAD4, SCRIB, MECP2, KRAS, ZHX2, SEMA7A, FAM129B, SZT2, SRGAP2, TENM4, CDK5R1, WDR5, ANKS1A, DDX6, PAK2, GIGYF2, DBN1, NEO1, CTTN, LRFN3, GATA2, GDPD5, IRX3, MOB2, FBXO31, CDH1, GAB2, GS…	ITGB1, PPT1, NFE2L2, TENT2, SLC9A6, CREB1, PIK3R1, ADNP, CAMSAP2, DNM1L, LYN, AGTPBP1, RTN4, COPS2, SNX3, RASGRF1, ENAH, NCK1, RAB11A, GPRC5B, TOPORS, TCF12, EPB41L3, YWHAH, SEC24B, VCL, OPHN1, CAPRIN1, EGFR, LSM1, VAPA, CCDC66, MEIS1, MAPK8, ISL1, NEPRO, TDP2, NR2F1, SPP1, CTF1, AREG, CCSAP, SLC11A2, ALKBH1, FGF13, RAB10, ARF4, SS18L1, PTPRK, IQGAP1, FMR1, PIK3CB, HPRT1, RAPGEF2, MATN2, LMO4, EI…
GO:1904668	positive regulation of ubiquitin protein...	79	5	1.74	140	0.03007	0.03007	1	1		0.648692	-0.957015	PSMA6, ANAPC7, UBC, ANAPC2, ANAPC11, PSMB10, RPS27A, CDK1, PSMA7, GORASP1	PSMD5, PSMD12, PSMA1, ANAPC10, PSMC6, CDC23, PSMA4, RAB1A, PSMD14, CDC27, PSMD6, UBE2E1, PSMD7
GO:0046513	ceramide biosynthetic process	31	3	0.68	141	0.0302	0.0302	1	1	The chemical reactions and pathways resulting in the formation of ceramides, any N-acylated sphingoid	0.585449	-0.386427	CERS2, CYR61, DEGS1, PRKAA1, ST3GAL5, ORMDL3, DEGS2	SPTSSA, UGCG, AGK, SAMD8
GO:0051058	negative regulation of small GTPase medi...	31	3	0.68	142	0.0302	0.0302	1	1	Any process that stops, prevents, or reduces the frequency, rate or extent of small GTPase mediated signal transduction	0.398554	-0.690876	ARHGAP35, FLCN, RAPGEF1, ARHGAP44	ITGB1, RASA1, SPRY2, MET, STAMBP, NF1, TNFAIP1, TGFB2, PPP2CB, KANK1
GO:0097300	programmed necrotic cell death	31	3	0.68	143	0.0302	0.0302	1	1	A necrotic cell death process that results from the activation of endogenous cellular processes, such as signaling involving death domain receptors or Toll-like receptors	0.50537	-0.485412	UBC, PGAM5, ALKBH7, IRF3, RPS27A, TRADD, TICAM1, CYLD	DNM1L, LY96, MLKL, FADD, BIRC2, PYGL
GO:0009144	purine nucleoside triphosphate metabolic...	197	9	4.35	2735	0.03028	0.67418	1	1	The chemical reactions and pathways involving purine nucleoside triphosphate, a compound consisting of a purine base linked to a ribose or deoxyribose sugar esterified with triphosphate on the sugar	0.700056	-0.984715	NDUFA11, UQCRHL, NDUFA2, NDUFB2, NME3, FIGNL1, PFKFB4, TSPO, MECP2, UQCC2, PRKAA1, NDUFA9, IMPDH1, ITPA, FLCN, UQCRQ, TGFB1, NDUFB6, SAMHD1, COX10, SIRT6, PARG, CDK1, HIF1A, OGDH, TAZ, SURF1	ATP5F1EP2, RHOQ, UQCRB, DNM1L, MSH2, NDUFS1, AP003108.2, ATP5F1C, MOCS2, MBIP, PMPCB, AK3, NDUFA12, BPGM, SLC25A13, NFS1, HSPA8, NDUFB1, GAPDH, SDHD, NDUFA6, AK9, NME7, NDUFAF7, NMNAT1, DLD
GO:0051347	positive regulation of transferase activ...	436	16	9.62	144	0.03139	0.03139	1	1	Any process that activates or increases the frequency, rate or extent of transferase activity, the catalysis of the transfer of a group, e.g. a methyl group, glycosyl group, acyl group, phosphorus-containing, or other groups, from a donor compound to an acceptor	1.0247	-1.48488	LRP8, PSMA6, FGFR3, KIF14, CCNK, FZD8, PRKAR2B, TIAM1, PRKAR1B, ANAPC7, UBC, DSCC1, CYR61, ADAM9, RASSF2, MADD, AKAP13, VAV2, WRAP53, KITLG, ANAPC2, CDK20, KRAS, IKBKG, MAGED1, TAB3, PRKAA1, ANAPC11, CDK5R1, PAK2, MAP2K3, S1PR2, C5AR1, CSPG4, TGFB1, RAPGEF1, MAPT, PSMB10, CRKL, HRAS, BMI1, EFNA1, RPS27A, CDK1, OSBPL8, IRAK2, PDGFRB, MAP3K15, ERP29, HSPA5, PSMA7, MAP2K1, GORASP1, DBNL, CAB39, PTPN…	POT1, PSMD5, ARRDC3, DVL3, PDGFD, NRK, PSMD12, PDCD10, ADNP, MAP2K4, HSP90AA1, EIF2AK2, PTGES3, PRKACB, UBE2N, PPP2R3C, LYN, DCUN1D5, PSMA1, ANAPC10, PDGFRA, PSMC6, GPRC5B, TOPORS, CDC23, HSPH1, PSMA4, MNAT1, TAB2, CALM2, AC068234.1, RFC4, NKX3-1, PIBF1, CCNH, MAP3K20, TCP1, FBXW7, EGFR, DCUN1D4, IQGAP3, RAB1A, LAMTOR3, FGF13, COPS8, MAP3K21, IQGAP1, ATP2B4, GREM1, STK3, PSMD14, PIK3CB, RAPGEF2, …
[truncated: 123 more rows]

## Sheet: top 500 upreg
GO id	Term	Genes in genome (background)	Genes in top-500 upreg	Expected genes in top-500 upreg	Rank in P.Fisher.elim	P.Fisher	P.Fisher.elim	FDR.Fisher	FDR.Fisher.elim	Description	Avg.LogFC for top-10 upreg	Avg.LogFC for top-10 downreg	Upreg genes (LogFC > 0.4)	Downreg genes (LogFC < -0.4)
[truncated: 489 more rows]

[truncated: 6 more sheets: top 1000 upreg, top 40 downreg, top 80 downreg, top 250 downreg, top 500 downreg, top 1000 downreg]
