# Supplementary material for: Effects of Siberian fir terpenes extract Abisil on antioxidant activity, autophagy, transcriptome and proteome of human fibroblasts
Source: Aging (Albany NY). 2021 Aug 24;13(16):20050–80. doi: 10.18632/aging.203448 (PMC8436938; doi:10.18632/aging.203448)
Supplement: Supplementary Table 7 [file aging-13-203448-s008.xlsx]

## Sheet: top 40 upreg
Supplementary Table 7. The results of Gene Ontology (biological processes) enrichment analysis for top 80, 250, 500 and 1000 up- or downregulated genes for the comparison of samples treated with high (50 µg/ml) and low-concentration Abisil (5 µg/ml).
GO id	Term	Genes in genome (background)	Genes in top-40 upreg	Expected genes in top-40 upreg	Rank in P.Fisher.elim	P.Fisher	P.Fisher.elim	FDR.Fisher	FDR.Fisher.elim	Description	Avg.LogFC for top-10 upreg	Avg.LogFC for top-10 downreg	Upreg genes (LogFC > 0.4)	Downreg genes (LogFC < -0.4)
GO:0034248	regulation of cellular amide metabolic p...	299	7	1.23	13	0.00018	0.00426	0.655556	1	Any process that modulates the frequency, rate or extent of the chemical reactions and pathways involving amides	0.893677	-0.424173	SERP1, PRKAA1, SECISBP2L, QKI, UHMK1, GIGYF2, RPS6KA3, RBMS3, SRP9, DDX3X, IREB2, AJUBA, CNOT8, PICALM, MTPN, DDX6, AGO2, CELF1, EIF4G3, PTCD3, FXR1, EIF2AK3, KHDRBS1, ZFP36L2, SOX4, TOB1, SMAD3, CYR61, EIF2S1, LARP4, FOXO3, SAMD8, TRMT10C, IGF2BP3, TNRC6B, PA2G4, CNOT6	ABCA7, SMAD1, PLK3
GO:0019058	viral life cycle	342	7	1.4	4	0.0004	0.00206	0.655556	1	A set of processes which all viruses follow to ensure survival; includes attachment and entry of the virus particle, decoding of genome information, translation of viral mRNA by host ribosomes, genome replication, and assembly and release of viral particles containing the genome	0.728578	-0.482577	PKN2, XPO1, RAB5A, KPNA3, DDX3X, CHD1, DEK, REST, NUP58, KPNA1, TOP2A, RPL21, VPS4B, THOC7, DDX6, EFNB2, YTHDC2, UBP1, ITGAV, ROCK2, PDCD6IP, GTF2F2, CHMP2B, NUP160, CD55, POLR2K, RPS3A, CD46, RPS25, TRIM32, CCNT2, NUP155, NUCKS1	NECTIN1, TYRO3, ITGB3, LRSAM1, GAS6, ISG15
GO:0050657	nucleic acid transport	161	5	0.66	425	0.00047	0.15069	0.655556	1	The directed movement of nucleic acids, single or double-stranded polynucleotides involved in the storage, transmission and transfer of genetic information, into, out of or within a cell, or between cells, by means of some agent such as a transporter or pore	0.888599	-0.305736	NXT2, G3BP2, AGFG1, QKI, PARP11, NMD3, XPO1, HNRNPA3, NUP58, RIOK2, THOC7, SRSF1, PHAX, KHDRBS1, SENP2, MAGOHB, NUP160, RANBP1, IGF2BP3, KIF5C, NUP155, ABCE1	WDR33
GO:0050658	RNA transport	161	5	0.66	426	0.00047	0.15069	0.655556	1	The directed movement of RNA, ribonucleic acids, into, out of or within a cell, or between cells, by means of some agent such as a transporter or pore	0.888599	-0.305736	NXT2, G3BP2, AGFG1, QKI, PARP11, NMD3, XPO1, HNRNPA3, NUP58, RIOK2, THOC7, SRSF1, PHAX, KHDRBS1, SENP2, MAGOHB, NUP160, RANBP1, IGF2BP3, KIF5C, NUP155, ABCE1	WDR33
GO:0051236	establishment of RNA localization	163	5	0.67	440	0.00049	0.15699	0.655556	1	The directed movement of RNA to a specific location	0.904169	-0.305736	NXT2, G3BP2, AGFG1, QKI, PARP11, NMD3, XPO1, ATM, HNRNPA3, NUP58, RIOK2, THOC7, SRSF1, PHAX, KHDRBS1, SENP2, MAGOHB, NUP160, RANBP1, IGF2BP3, KIF5C, NUP155, ABCE1	WDR33
GO:0034250	positive regulation of cellular amide me...	91	4	0.37	92	0.00049	0.03238	0.655556	1	Any process that activates or increases the frequency, rate or extent of the chemical reactions and pathways involving amides	0.637753	-0.268695	SERP1, UHMK1, RBMS3, DDX3X, PICALM, KHDRBS1, SOX4, CYR61, LARP4, TRMT10C	PLK3
GO:0008380	RNA splicing	358	7	1.47	95	0.00053	0.03413	0.655556	1	The process of removing sections of the primary RNA transcript to remove sequences not present in the mature form of the RNA and joining the remaining sections to form the mature form of the RNA	0.869781	-0.450477	DDX20, PRPF39, MBNL2, QKI, ZRANB2, PRPF38B, NUDT21, ELAVL2, PSIP1, LSM5, HNRNPA3, PTBP2, THOC7, PNN, CELF1, WTAP, ZNF326, SRSF1, YTHDC1, KHDRBS1, DYRK1A, CWC15, PPP4R2, MAGOHB, RNPC3, TSEN2, TSEN15, PAPOLA, GTF2F2, SNRPE, SFPQ, POLR2K, CWC27, RBM22, NSRP1, PTBP3, ZPR1, PPIL1, PPIG	MTREX, AC009690.3, SRPK3, PRPF40B, WDR62, WDR33
GO:0007010	cytoskeleton organization	741	10	3.04	444	0.00058	0.15894	0.655556	1	A process that is carried out at the cellular level which results in the assembly, arrangement of constituent parts, or disassembly of cytoskeletal structures	0.989582	-0.963734	SLAIN2, AGFG1, SH3D19, PHLDB2, COBLL1, TGFBR1, CLIC4, MAP3K1, ARPC1B, XPO1, MZT1, SRGAP2C, CDK5R1, DNAAF4, CEP126, NEK7, ARHGAP18, PHIP, ARF6, MAP3K2, SASS6, PRKAR1A, GMFB, HOOK3, CHORDC1, EDN1, CDK1, SLC16A1, SSH2, TUBD1, ATXN7, DNAAF2, MYO1B, USP33, FIGNL1, CORO2A, RICTOR, PARVA, CD2AP, MARCKS, ARPC5, AJUBA, PCLAF, GAS2L3, CDKN1B, KIF18A, ADD3, PKD2, MTPN, MYPN, DPYSL2, CTNNB1, TUBB2A, VPS4B, O…	CRYAB, AURKC, STMN3, CORO1A, WASL, FLNA, LAMA5, MKLN1, SRC, CLIP3, INF2, TMOD1, ATP2C1, ABRAXAS2, AXIN1, WDR62, ARHGDIA, PLK3, MAP2, ALMS1, FHOD3, TESK2, GAS8, ARAP1, AGRN, PARD6A, BRSK1
GO:0007059	chromosome segregation	260	6	1.07	300	0.00059	0.10545	0.655556	1	The process in which genetic material, in the form of chromosomes, is organized into specific structures and then physically separated and apportioned to two or more sets. In eukaryotes, chromosome segregation begins with the condensation of chromosomes, includes chromosome separation, and ends when chromosomes have completed movement to the spindle poles	0.790678	-0.451632	CENPQ, DSCC1, XPO1, KNL1, ATM, LEMD3, CHAMP1, DDX3X, PPP1CC, NAA50, ESCO2, KIF18A, TOP2A, CTNNB1, BRIP1, RB1, VPS4B, CENPK, CDC27, RAD21, CCNE2, ITGB3BP, STAG2, TOP1, GEN1, RACGAP1, BRCA1, CHMP2B, NUP160, SFPQ, NDC80, TOP2B, SKA1, SPDL1, BECN1	AURKC, SLX4, TOP3B, ABRAXAS2, INCENP
GO:0000819	sister chromatid segregation	186	5	0.76	607	0.0009	0.24604	0.735714	1	The cell cycle process in which sister chromatids are organized and then physically separated and apportioned to two or more sets	0.766748	-0.349564	CENPQ, DSCC1, XPO1, KNL1, ATM, CHAMP1, PPP1CC, NAA50, KIF18A, TOP2A, CTNNB1, RB1, VPS4B, CENPK, CDC27, RAD21, ITGB3BP, STAG2, GEN1, RACGAP1, CHMP2B, NUP160, SFPQ, NDC80, TOP2B, SKA1, SPDL1, BECN1	AURKC, INCENP
GO:0015931	nucleobase-containing compound transport	188	5	0.77	581	0.00094	0.23201	0.735714	1	The directed movement of nucleobases, nucleosides, nucleotides and nucleic acids, into, out of or within a cell, or between cells, by means of some agent such as a transporter or pore	0.955775	-0.344131	NXT2, G3BP2, AGFG1, SLC25A24, QKI, PARP11, NMD3, XPO1, GJA1, SLC25A32, SLC35A3, HNRNPA3, NUP58, RIOK2, THOC7, SRSF1, PHAX, KHDRBS1, SENP2, MAGOHB, SLC35A1, NUP160, SLC35B4, RANBP1, IGF2BP3, KIF5C, NUP155, ABCE1	WDR33
GO:0006397	mRNA processing	395	7	1.62	1	0.00095	0.00095	0.735714	1	Any process involved in the conversion of a primary mRNA transcript into one or more mature mRNA(s) prior to translation into polypeptide	0.900989	-0.489664	DDX20, PRPF39, MBNL2, QKI, GTF2H2, ZRANB2, PRPF38B, NUDT21, ELAVL2, PSIP1, LSM5, HNRNPA3, PTBP2, THOC7, PNN, CELF1, WTAP, ZNF326, RNGTT, SRSF1, YTHDC1, KHDRBS1, DYRK1A, CWC15, RNF20, PPP4R2, MAGOHB, PAN3, RNPC3, TSEN2, TSEN15, LSM11, PAPOLA, GTF2F2, CDC73, SNRPE, SFPQ, POLR2K, CWC27, RBM22, NSRP1, PTBP3, ZPR1, PPIL1	CDK11A, MTREX, AC009690.3, SRPK3, PRPF40B, WDR33
GO:0007062	sister chromatid cohesion	110	4	0.45	2	0.00101	0.00101	0.735714	1	The cell cycle process in which the sister chromatids of a replicated chromosome are associated with each other	0.727734	-0.232764	CENPQ, DSCC1, XPO1, KNL1, PPP1CC, NAA50, KIF18A, CTNNB1, RB1, CENPK, RAD21, ITGB3BP, STAG2, NUP160, SFPQ, NDC80, SKA1, SPDL1	INCENP
GO:0006403	RNA localization	192	5	0.79	602	0.00103	0.24339	0.735714	1	A process in which RNA is transported to, or maintained in, a specific location	0.904169	-0.305736	NXT2, G3BP2, AGFG1, QKI, PARP11, NMD3, XPO1, ATM, HNRNPA3, NUP58, RIOK2, THOC7, SRSF1, PHAX, KHDRBS1, SENP2, MAGOHB, NUP160, RANBP1, IGF2BP3, KIF5C, NUP155, ABCE1	WDR33
GO:0006405	RNA export from nucleus	117	4	0.48	3	0.00127	0.00127	0.814286	1	The directed movement of RNA from the nucleus to the cytoplasm	0.660621	-0.294974	AGFG1, NMD3, XPO1, NUP58, RIOK2, THOC7, SRSF1, PHAX, KHDRBS1, MAGOHB, NUP160, RANBP1, NUP155, ABCE1	WDR33
GO:0016032	viral process	685	9	2.81	729	0.00141	0.33137	0.814286	1	A multi-organism process in which a virus is a participant. The other participant is the host. Includes infection of a host cell, replication of the viral genome, and assembly of progeny virus particles. In some cases the viral genetic material may integrate into the host genome and only subsequently, under particular circumstances, 'complete' its life cycle	0.847569	-0.805611	PKN2, CUL5, TRAM1, XPO1, BNIP3L, ELMOD2, RAB5A, KPNA3, CREBZF, POLR3G, DDX3X, PSIP1, MORC3, CHD1, DEK, REST, NUP58, KPNA1, SIRT1, TOP2A, RPL21, AP1S2, RB1, VPS4B, THOC7, TAF1, DDX6, ATF7IP, EFNB2, AP1S3, EIF4G3, YTHDC2, POLR3K, IPO7, UBP1, RNGTT, CHUK, ANKRD17, ITGAV, PRMT6, DYRK1A, TOP1, URI1, ROCK2, TAF4, SMAD3, KAT2B, PDCD6IP, GTF2F2, CHMP2B, NUP160, CD55, POLR2K, GBP1, RPS3A, RANBP1, CD46, AB…	HTRA1, NECTIN1, CRTC1, ACTA2, TYRO3, ITGB3, LRSAM1, SRC, GAS6, KLC1, CARM1, GBF1, IKBKG, VRK2, SIN3A, RBCK1, PARD6A, ISG15
GO:0044764	multi-organism cellular process	687	9	2.82	732	0.00144	0.33393	0.814286	1	Any process that is carried out at the cellular level which involves another organism of the same or different species	0.847569	-0.805611	PKN2, CUL5, TRAM1, XPO1, BNIP3L, ELMOD2, RAB5A, KPNA3, CREBZF, POLR3G, DDX3X, PSIP1, MORC3, CHD1, DEK, REST, NUP58, KPNA1, SIRT1, TOP2A, RPL21, AP1S2, RB1, VPS4B, THOC7, TAF1, DDX6, ATF7IP, EFNB2, AP1S3, EIF4G3, YTHDC2, POLR3K, IPO7, UBP1, RNGTT, CHUK, ANKRD17, ITGAV, PRMT6, DYRK1A, TOP1, URI1, ROCK2, TAF4, SMAD3, KAT2B, PDCD6IP, GTF2F2, CHMP2B, NUP160, CD55, POLR2K, GBP1, RPS3A, RANBP1, CD46, AB…	HTRA1, NECTIN1, CRTC1, ACTA2, TYRO3, ITGB3, LRSAM1, SRC, GAS6, KLC1, CARM1, GBF1, IKBKG, VRK2, SIN3A, RBCK1, PARD6A, ISG15
GO:0032481	positive regulation of type I interferon...	56	3	0.23	359	0.00151	0.12757	0.814286	1	Any process that activates or increases the frequency, rate, or extent of type I interferon production. Type I interferons include the interferon-alpha, beta, delta, episilon, zeta, kappa, tau, and omega gene families	0.486873	-0.241922	POLR3G, DDX3X, CTNNB1, POLR3K, CHUK, POLR2K
GO:0044403	symbiosis, encompassing mutualism throug...	702	9	2.88	757	0.00168	0.35302	0.814286	1	An interaction between two organisms living together in more or less intimate association. The term host is usually used for the larger (macro) of the two members of a symbiosis. The smaller (micro) member is called the symbiont organism. Microscopic symbionts are often referred to as endosymbionts. The various forms of symbiosis include parasitism, in which the association is disadvantageous or …	0.847569	-0.805611	PKN2, CUL5, TRAM1, XPO1, BNIP3L, ELMOD2, RAB5A, KPNA3, CREBZF, POLR3G, DDX3X, PSIP1, MORC3, CHD1, DEK, REST, NUP58, KPNA1, SIRT1, TOP2A, RPL21, AP1S2, CTNNB1, RB1, VPS4B, THOC7, TAF1, DDX6, ATF7IP, EFNB2, AP1S3, EIF4G3, YTHDC2, POLR3K, CTNND1, IPO7, UBP1, RNGTT, CHUK, ANKRD17, ITGAV, PRMT6, DYRK1A, TOP1, URI1, ROCK2, TAF4, SMAD3, KAT2B, PDCD6IP, GTF2F2, CHMP2B, NUP160, CD55, POLR2K, GBP1, RPS3A, …	HTRA1, NECTIN1, CRTC1, ACTA2, TYRO3, ITGB3, LRSAM1, SRC, GAS6, KLC1, CARM1, GBF1, IKBKG, VRK2, SIN3A, RBCK1, PARD6A, ISG15
GO:0043603	cellular amide metabolic process	704	9	2.89	830	0.00171	0.40667	0.814286	1	The chemical reactions and pathways involving an amide, any derivative of an oxoacid in which an acidic hydroxy group has been replaced by an amino or substituted amino group, as carried out by individual cells	0.971981	-0.507308	SERP1, PRKAA1, SGMS1, SECISBP2L, QKI, ERAP1, GTF2H2, UHMK1, GIGYF2, RPS6KA3, CARNMT1, MRPS18C, RBMS3, UGCG, SRP9, EEF2K, DDX3X, EEF1E1, SLC25A32, CPS1, RPL22L1, IREB2, AJUBA, CNOT8, PICALM, IMMP1L, MTPN, RPL21, MRPL33, DDX6, AGO2, CELF1, GCLC, EIF4G3, SLC46A1, DENR, PTCD3, CHAC2, FXR1, EIF2AK3, KHDRBS1, GFM1, ZFP36L2, SOX4, MRPL30, MRPL35, TOB1, PCSK7, SMAD3, CYR61, EIF2S1, LARP4, GUF1, FOXO3, GG…	GSTM4, ABCA7, MGST1, SMAD1, GAS6, AASDH, PLK3
GO:0044419	interspecies interaction between organis...	704	9	2.89	759	0.00171	0.35555	0.814286	1	Any process in which an organism has an effect on an organism of a different species	0.847569	-0.805611	PKN2, CUL5, TRAM1, XPO1, BNIP3L, ELMOD2, RAB5A, KPNA3, CREBZF, POLR3G, DDX3X, PSIP1, MORC3, CHD1, DEK, REST, NUP58, KPNA1, SIRT1, TOP2A, RPL21, AP1S2, CTNNB1, RB1, VPS4B, THOC7, TAF1, DDX6, ATF7IP, EFNB2, AP1S3, EIF4G3, YTHDC2, POLR3K, CTNND1, IPO7, UBP1, RNGTT, CHUK, ANKRD17, ITGAV, PRMT6, DYRK1A, TOP1, URI1, ROCK2, TAF4, SMAD3, KAT2B, PDCD6IP, GTF2F2, CHMP2B, NUP160, CD55, POLR2K, GBP1, RPS3A, …	HTRA1, NECTIN1, CRTC1, ACTA2, TYRO3, ITGB3, LRSAM1, SRC, GAS6, KLC1, CARM1, GBF1, IKBKG, VRK2, SIN3A, RBCK1, PARD6A, ISG15
GO:0098813	nuclear chromosome segregation	219	5	0.9	731	0.00186	0.33357	0.836735	1		0.782278	-0.424137	CENPQ, DSCC1, XPO1, KNL1, ATM, LEMD3, CHAMP1, PPP1CC, NAA50, KIF18A, TOP2A, CTNNB1, BRIP1, RB1, VPS4B, CENPK, CDC27, RAD21, CCNE2, ITGB3BP, STAG2, GEN1, RACGAP1, CHMP2B, NUP160, SFPQ, NDC80, TOP2B, SKA1, SPDL1, BECN1	AURKC, SLX4, ABRAXAS2, INCENP
GO:0043604	amide biosynthetic process	585	8	2.4	51	0.00212	0.02041	0.836735	1	The chemical reactions and pathways resulting in the formation of an amide, any derivative of an oxoacid in which an acidic hydroxy group has been replaced by an amino or substituted amino group	0.955125	-0.405479	SERP1, PRKAA1, SGMS1, SECISBP2L, QKI, GTF2H2, UHMK1, GIGYF2, RPS6KA3, MRPS18C, RBMS3, UGCG, SRP9, EEF2K, DDX3X, EEF1E1, CPS1, RPL22L1, IREB2, AJUBA, CNOT8, MTPN, RPL21, MRPL33, DDX6, AGO2, CELF1, GCLC, EIF4G3, DENR, PTCD3, CHAC2, FXR1, EIF2AK3, KHDRBS1, GFM1, ZFP36L2, SOX4, MRPL30, MRPL35, TOB1, SMAD3, CYR61, EIF2S1, LARP4, GUF1, FOXO3, GGCT, RPS3A, SAMD8, TRMT10C, IGF2BP3, RPS25, MRPL47, TNRC6B,…	SMAD1, AASDH
GO:0039694	viral RNA genome replication	17	2	0.07	178	0.00214	0.062	0.836735	1	The replication of a viral RNA genome	0.22127	-0.179855	RAB5A, TOP2A, ROCK2
GO:0039703	RNA replication	17	2	0.07	179	0.00214	0.062	0.836735	1	The cellular metabolic process in which a cell duplicates one or more molecules of RNA	0.22127	-0.179855	RAB5A, TOP2A, ROCK2
GO:0016071	mRNA metabolic process	590	8	2.42	935	0.00224	0.49538	0.836735	1	The chemical reactions and pathways involving mRNA, messenger RNA, which is responsible for carrying the coded genetic 'message', transcribed from DNA, to sites of protein assembly at the ribosomes	0.908503	-0.519669	DDX20, PRPF39, MBNL2, QKI, GTF2H2, ZRANB2, PRPF38B, NUDT21, ELAVL2, ATM, PSIP1, LSM5, HIF1A, HNRNPA3, CNOT8, C5AR1, PTBP2, RPL21, THOC7, DDX6, PNN, AGO2, CELF1, WTAP, POLR3K, ZNF326, RNGTT, SRSF1, YTHDC1, PNRC2, KHDRBS1, DYRK1A, BAG4, ZFP36L2, CWC15, RNF20, TOB1, PPP4R2, MAGOHB, PAN3, RNPC3, TSEN2, TSEN15, LSM11, PAPOLA, GTF2F2, CDC73, SNRPE, SFPQ, POLR2K, RPS3A, CWC27, RPS25, RBM22, NSRP1, PTBP3…	CDK11A, MTREX, FLNA, AC009690.3, SRPK3, PRPF40B, DHX34, HIPK3, WDR33
GO:0045948	positive regulation of translational ini...	18	2	0.07	5	0.0024	0.0024	0.836735	1	Any process that activates or increases the frequency, rate or extent of translational initiation	0.342387	-0.0379354	UHMK1, DDX3X, KHDRBS1
GO:0006996	organelle organization	2585	19	10.61	687	0.00278	0.30007	0.836735	1	A process that is carried out at the cellular level which results in the assembly, arrangement of constituent parts, or disassembly of an organelle within a cell. An organelle is an organized structure of distinctive morphology and function. Includes the nucleus, mitochondria, plastids, vacuoles, vesicles, ribosomes and the cytoskeleton. Excludes the plasma membrane	1.16217	-1.14717	MIGA1, GDAP1, PRKAR2B, SLAIN2, G3BP2, PRKAA1, ASCC3, AGFG1, SH3D19, ATAD2B, TIMM17A, CENPQ, WWTR1, PHLDB2, COBLL1, TGFBR1, DSCC1, GTF2H2, CLIC4, PARP11, CLOCK, MAP3K1, ARPC1B, XPO1, MZT1, SRGAP2C, PEX11A, STAM, BNIP3L, CDK5R1, DNAAF4, ATF2, CEP126, TRNT1, KNL1, ASH1L, NAP1L3, NEK7, EID1, POC1B, ARHGAP18, ANP32E, CCNG1, TDG, TMED2, PHIP, ARF6, MAP3K2, SASS6, TNKS2, PRKAR1A, OSBPL8, RAB8B, HMGN5, C…	CRYAB, FZD5, CNIH2, AURKC, GRWD1, CDK11A, STMN3, CORO1A, EHD3, OMA1, PIF1, CHCHD10, WASL, SLX4, RIOX1, PLEKHF1, RNF2, RRP7BP, TBC1D3L, SEC24B, FLNA, ARID4B, ADAMTS16, RABGAP1L, LAMA5, NRF1, GGNBP1, MKLN1, PRELID3A, LRSAM1, SRC, TMEM175, CLIP3, WASHC4, FSD1, INF2, ATG2A, TOP3B, KLC1, TMOD1, ZKSCAN3, RTEL1, RAB31, CARM1, ATP2C1, ABRAXAS2, VPS51, TFEB, AXIN1, GBF1, KMT2B, TSNARE1, WDR62, ARHGDIA, FB…
GO:0006518	peptide metabolic process	616	8	2.53	71	0.00294	0.0258	0.836735	1	The chemical reactions and pathways involving peptides, compounds of two or more amino acids where the alpha carboxyl group of one is bound to the alpha amino group of another	0.911773	-0.506631	SERP1, SECISBP2L, QKI, ERAP1, GTF2H2, UHMK1, GIGYF2, RPS6KA3, CARNMT1, MRPS18C, RBMS3, SRP9, EEF2K, DDX3X, EEF1E1, RPL22L1, IREB2, AJUBA, CNOT8, PICALM, IMMP1L, MTPN, RPL21, MRPL33, DDX6, AGO2, CELF1, GCLC, EIF4G3, DENR, PTCD3, CHAC2, FXR1, EIF2AK3, KHDRBS1, GFM1, ZFP36L2, SOX4, MRPL30, MRPL35, TOB1, PCSK7, SMAD3, EIF2S1, LARP4, GUF1, FOXO3, GGCT, RPS3A, TRMT10C, IGF2BP3, RPS25, MRPL47, TNRC6B, T…	GSTM4, ABCA7, MGST1, SMAD1, GAS6, AASDH, PLK3
GO:0006396	RNA processing	771	9	3.16	793	0.0032	0.37498	0.836735	1	Any process involved in the conversion of one or more primary RNA transcripts into one or more mature RNA molecules	0.932995	-0.606515	DDX20, PRPF39, MBNL2, QKI, GTF2H2, TRMT13, ZRANB2, PRPF38B, TRNT1, NUDT21, ERI2, NUFIP1, ELAVL2, C1D, PSIP1, INTS2, LSM5, ALKBH8, HNRNPA3, RIOK2, SIRT1, PTBP2, UTP23, RPL21, THOC7, PNN, AGO2, CELF1, WDR43, WTAP, YTHDC2, ZNF326, RNGTT, SRSF1, YTHDC1, KHDRBS1, DYRK1A, TRMT5, CWC15, RNF20, PPP4R2, MAGOHB, PAN3, RNPC3, TSEN2, SMAD3, OSGEP, TSEN15, LSM11, PAPOLA, GTF2F2, CDC73, SNRPE, SFPQ, POLR2K, RP…	CDK11A, LCMT2, WDR4, RRP7BP, MTREX, EMG1, SMAD1, AC009690.3, SRPK3, PRPF40B, DUS3L, WDR62, TBL3, KIAA0391, TRUB2, DHX34, ADAT3, PUSL1, DDX54, WDR33, CTU2
GO:0032728	positive regulation of interferon-beta p...	21	2	0.09	6	0.00327	0.00327	0.836735	1	Any process that activates or increases the frequency, rate, or extent of interferon-beta production	0.371145	-0.0521703	POLR3G, DDX3X
GO:0019079	viral genome replication	74	3	0.3	94	0.00337	0.03404	0.836735	1	Any process involved directly in viral genome replication, including viral nucleotide metabolism	0.605842	-0.296018	PKN2, RAB5A, DDX3X, DEK, TOP2A, YTHDC2, UBP1, ROCK2, NUCKS1	GAS6, ISG15
GO:1902589	single-organism organelle organization	1108	11	4.55	202	0.00369	0.06777	0.836735	1	An organelle organization which involves only one organism	1.10225	-0.747017	MIGA1, GDAP1, PRKAR2B, SLAIN2, AGFG1, CENPQ, WWTR1, PHLDB2, COBLL1, TGFBR1, DSCC1, MAP3K1, ARPC1B, XPO1, MZT1, SRGAP2C, BNIP3L, CDK5R1, DNAAF4, ATF2, CEP126, KNL1, POC1B, ARHGAP18, ARF6, MAP3K2, PRKAR1A, RAB8B, ATM, KIF5B, GMFB, CHAMP1, HOOK3, EDN1, ICK, TBC1D9, CDK1, SSH2, DNA2, PTPDC1, C2CD5, DNAAF2, MYO1B, FIGNL1, PPP1CC, NAA50, CORO2A, RICTOR, PARVA, CD2AP, HIF1A, MARCKS, ARPC5, STX6, GAS2L3,…	FZD5, AURKC, STMN3, CORO1A, EHD3, OMA1, WASL, TBC1D3L, FLNA, ADAMTS16, RABGAP1L, LAMA5, MKLN1, SRC, TMEM175, CLIP3, INF2, ATG2A, KLC1, TMOD1, RTEL1, ATP2C1, AXIN1, GBF1, TSNARE1, ARHGDIA, FBF1, PLK3, PEX16, MCOLN1, ALMS1, FHOD3, INCENP, AC005670.2, TESK2, NEDD1, GAS8, ARAP1, STX1B
GO:0007049	cell cycle	1283	12	5.26	165	0.00378	0.05864	0.836735	1	The progression of biochemical and morphological phases and events that occur in a cell during successive cell replication or nuclear replication events. Canonically, the cell cycle comprises the replication and segregation of genetic material followed by the division of the cell, but in endocycles or syncytial cells nuclear replication or nuclear division may not be followed by cell division	1.07734	-0.700393	LIN9, PRKAR2B, PRKAA1, PKN2, PPP1CB, CUL5, CENPQ, TIPRL, TGFBR1, DSCC1, CLOCK, XPO1, MZT1, UHMK1, CDK5R1, GIGYF2, ATF2, CEP126, KNL1, NEK7, RPS6KA3, EID1, CCNG1, PHIP, ARF6, SKIL, SASS6, PRKAR1A, HMGN5, ATM, LEMD3, CHAMP1, BACH1, CCNI, MYBL1, CHORDC1, EDN1, CDK1, PTP4A1, ZFHX3, DDX3X, DNA2, BIRC6, USP33, SKP2, CDK15, FIGNL1, PPP1CC, NAA50, TOPBP1, FOXN3, CDK8, CUL4B, CCNC, CD2AP, AJUBA, NPAT, LRR…	AURKC, LZTS1, CDK11A, WASL, SLX4, ZNF16, RNF2, E2F8, FLNA, MNT, LIN37, PTCH1, TMEM8B, TRIM36, MRNIP, GAS2L1, SRC, MED25, FSD1, ID2, SEPT1, GAS6, FBXL15, RTEL1, CARM1, ABRAXAS2, ZFYVE26, JUNB, GBF1, WDR62, PLK3, ALMS1, SIN3A, FLT3LG, INCENP, DMTF1, CLSPN, NEDD1, ARAP1, KCTD11, PARD6A, BRSK1, XPC
GO:0051168	nuclear export	159	4	0.65	1278	0.00389	1	0.836735	1	The directed movement of substances out of the nucleus	0.722151	-0.354886	AGFG1, NMD3, XPO1, UHMK1, CTDSPL2, NUP58, RIOK2, THOC7, SRSF1, PHAX, KHDRBS1, SOX4, MAGOHB, NUP160, RANBP1, STRADB, NUP155, ABCE1	GAS6, WDR33
GO:0010608	posttranscriptional regulation of gene e...	378	6	1.55	145	0.00399	0.04933	0.836735	1	Any process that modulates the frequency, rate or extent of gene expression after the production of an RNA transcript	0.86736	-0.383611	SERP1, SECISBP2L, QKI, XPO1, UHMK1, GIGYF2, RPS6KA3, RBMS3, SRP9, DDX3X, IREB2, AJUBA, CNOT8, MTPN, DDX6, AGO2, CELF1, EIF4G3, PTCD3, FXR1, EIF2AK3, KHDRBS1, ZFP36L2, SOX4, TOB1, SMAD3, EIF2S1, LARP4, FOXO3, TRMT10C, IGF2BP3, TNRC6B, PA2G4, CNOT6	SMAD1
GO:0000921	septin ring assembly	1	1	0	7	0.0041	0.0041	0.836735	1	The aggregation, arrangement and bonding together of septins and associated proteins to form an organized structure resembling a ring at the cell cortex	0.534914	0.534914	ANLN
GO:0002041	intussusceptive angiogenesis	1	1	0	8	0.0041	0.0041	0.836735	1	The formation of new blood vessels as a result of the insertion and extension of lumenal tissue pillars	0.455384	0.455384	CYR61
GO:0021684	cerebellar granular layer formation	1	1	0	1279	0.0041	1	0.836735	1	The process that gives rise to the cerebellar granule layer. This process pertains to the initial formation of a structure from unspecified parts. The granular layer is the innermost layer of the cerebellar cortex. This layer contains densely packed small neurons, mostly granule cells. Some Golgi cells are found at the outer border. Granule neurons send parallel fibers to the upper molecular laye…	0.578614	0.578614	MTPN
GO:0021707	cerebellar granule cell differentiation	1	1	0	9	0.0041	0.0041	0.836735	1	The process in which neuroblasts acquire specialized structural and/or functional features that characterize the mature cerebellar granule cell. Differentiation includes the processes involved in commitment of a neuroblast to a granule cell fate. A granule cell is a glutamatergic interneuron found in the cerebellar cortex	0.578614	0.578614	MTPN
GO:0031106	septin ring organization	1	1	0	1280	0.0041	1	0.836735	1	Control of the formation, spatial distribution, and breakdown of the septin ring	0.534914	0.534914	ANLN
GO:0032185	septin cytoskeleton organization	1	1	0	1281	0.0041	1	0.836735	1	A process that is carried out at the cellular level which results in the assembly, arrangement of constituent parts, or disassembly of cytoskeletal structures comprising septin complexes and their associated proteins	0.534914	0.534914	ANLN
GO:0045870	positive regulation of single stranded v...	1	1	0	10	0.0041	0.0041	0.836735	1	Any process that activates or increases the frequency, rate or extent of retroviral genome replication	0.576001	0.576001	TOP2A
GO:1902959	regulation of aspartic-type endopeptidas...	1	1	0	1282	0.0041	1	0.836735	1	Any process that modulates the frequency, rate or extent of aspartic-type endopeptidase activity involved in amyloid precursor protein catabolic process	0.595412	0.595412	PICALM
GO:1902961	positive regulation of aspartic-type end...	1	1	0	11	0.0041	0.0041	0.836735	1	Any process that activates or increases the frequency, rate or extent of aspartic-type endopeptidase activity involved in amyloid precursor protein catabolic process	0.595412	0.595412	PICALM
GO:1902962	regulation of metalloendopeptidase activ...	1	1	0	1283	0.0041	1	0.836735	1	Any process that modulates the frequency, rate or extent of metalloendopeptidase activity involved in amyloid precursor protein catabolic process	0.595412	0.595412	PICALM
GO:1902963	negative regulation of metalloendopeptid...	1	1	0	12	0.0041	0.0041	0.836735	1	Any process that stops, prevents or reduces the frequency, rate or extent of metalloendopeptidase activity involved in amyloid precursor protein catabolic process	0.595412	0.595412	PICALM
GO:1905245	regulation of aspartic-type peptidase ac...	1	1	0	1284	0.0041	1	0.836735	1		0.595412	0.595412	PICALM
GO:1905247	positive regulation of aspartic-type pep...	1	1	0	1285	0.0041	1	0.836735	1		0.595412	0.595412	PICALM
GO:1903902	positive regulation of viral life cycle	81	3	0.33	111	0.00434	0.04023	0.868	1		0.586453	-0.244622	PKN2, DDX3X, CHD1, TOP2A, VPS4B, YTHDC2, GTF2F2, CHMP2B, POLR2K, NUCKS1
GO:0006417	regulation of translation	272	5	1.12	212	0.00473	0.07468	0.926923	1	Any process that modulates the frequency, rate or extent of the chemical reactions and pathways resulting in the formation of proteins by the translation of mRNA	0.841338	-0.381803	SERP1, SECISBP2L, QKI, UHMK1, GIGYF2, RPS6KA3, RBMS3, SRP9, DDX3X, IREB2, AJUBA, CNOT8, MTPN, DDX6, AGO2, CELF1, EIF4G3, PTCD3, FXR1, EIF2AK3, KHDRBS1, ZFP36L2, SOX4, TOB1, SMAD3, EIF2S1, LARP4, FOXO3, TRMT10C, IGF2BP3, TNRC6B, PA2G4, CNOT6	SMAD1
GO:0006412	translation	525	7	2.15	128	0.00482	0.04424	0.926923	1	The cellular metabolic process in which a protein is formed, using the sequence of a mature mRNA molecule to specify the sequence of amino acids in a polypeptide chain. Translation is mediated by the ribosome, and begins with the formation of a ternary complex between aminoacylated initiator methionine tRNA, GTP, and initiation factor 2, which subsequently associates with the small subunit of the…	0.885355	-0.389866	SERP1, SECISBP2L, QKI, GTF2H2, UHMK1, GIGYF2, RPS6KA3, MRPS18C, RBMS3, SRP9, EEF2K, DDX3X, EEF1E1, RPL22L1, IREB2, AJUBA, CNOT8, MTPN, RPL21, MRPL33, DDX6, AGO2, CELF1, EIF4G3, DENR, PTCD3, FXR1, EIF2AK3, KHDRBS1, GFM1, ZFP36L2, SOX4, MRPL30, MRPL35, TOB1, SMAD3, EIF2S1, LARP4, GUF1, FOXO3, RPS3A, TRMT10C, IGF2BP3, RPS25, MRPL47, TNRC6B, TARSL2, PA2G4, CNOT6, ABCE1	SMAD1
GO:0000375	RNA splicing, via transesterification re...	278	5	1.14	14	0.00519	0.00519	0.975	1	Splicing of RNA via a series of two transesterification reactions	0.772504	-0.429201	DDX20, PRPF39, MBNL2, NUDT21, ELAVL2, PSIP1, LSM5, HNRNPA3, PTBP2, PNN, CELF1, WTAP, SRSF1, YTHDC1, KHDRBS1, DYRK1A, CWC15, MAGOHB, RNPC3, PAPOLA, GTF2F2, SNRPE, SFPQ, POLR2K, CWC27, RBM22, NSRP1, PPIL1	MTREX, AC009690.3, SRPK3, PRPF40B, WDR33
GO:0032479	regulation of type I interferon producti...	87	3	0.36	577	0.00531	0.22725	0.975	1	Any process that modulates the frequency, rate, or extent of interferon type I production. Type I interferons include the interferon-alpha, beta, delta, episilon, zeta, kappa, tau, and omega gene families	0.521046	-0.32457	POLR3G, DDX3X, DTX4, CTNNB1, POLR3K, CHUK, POLR2K, TRIM32	ISG15
GO:0032606	type I interferon production	88	3	0.36	580	0.00548	0.23027	0.975	1	The appearance of type I interferon due to biosynthesis or secretion following a cellular stimulus, resulting in an increase in its intracellular or extracellular levels. Type I interferons include the interferon-alpha, beta, delta, episilon, zeta, kappa, tau, and omega gene families	0.521046	-0.32457	POLR3G, DDX3X, DTX4, CTNNB1, POLR3K, CHUK, POLR2K, TRIM32	ISG15
GO:0043043	peptide biosynthetic process	539	7	2.21	144	0.00557	0.0488	0.975	1	The chemical reactions and pathways resulting in the formation of peptides, compounds of 2 or more (but usually less than 100) amino acids where the alpha carboxyl group of one is bound to the alpha amino group of another. This may include the translation of a precursor protein and its subsequent processing into a functional peptide	0.885355	-0.401918	SERP1, SECISBP2L, QKI, GTF2H2, UHMK1, GIGYF2, RPS6KA3, MRPS18C, RBMS3, SRP9, EEF2K, DDX3X, EEF1E1, RPL22L1, IREB2, AJUBA, CNOT8, MTPN, RPL21, MRPL33, DDX6, AGO2, CELF1, GCLC, EIF4G3, DENR, PTCD3, CHAC2, FXR1, EIF2AK3, KHDRBS1, GFM1, ZFP36L2, SOX4, MRPL30, MRPL35, TOB1, SMAD3, EIF2S1, LARP4, GUF1, FOXO3, GGCT, RPS3A, TRMT10C, IGF2BP3, RPS25, MRPL47, TNRC6B, TARSL2, PA2G4, CNOT6, ABCE1	SMAD1, AASDH
GO:0048524	positive regulation of viral process	89	3	0.37	130	0.00565	0.04779	0.975	1	Any process that activates or increases the frequency, rate or extent of a multi-organism process in which a virus is a participant	0.596266	-0.255231	PKN2, DDX3X, CHD1, TOP2A, VPS4B, YTHDC2, ANKRD17, GTF2F2, CHMP2B, POLR2K, NUCKS1
GO:0045070	positive regulation of viral genome repl...	28	2	0.11	286	0.00578	0.10244	0.975	1	Any process that activates or increases the frequency, rate or extent of viral genome replication	0.436102	-0.133391	PKN2, DDX3X, TOP2A, YTHDC2, NUCKS1
GO:0022402	cell cycle process	1006	10	4.13	302	0.00584	0.1064	0.975	1	The cellular process that ensures successive accurate and complete genome replication and chromosome segregation	1.03313	-0.688508	PRKAR2B, PRKAA1, PKN2, PPP1CB, CUL5, CENPQ, TGFBR1, DSCC1, XPO1, MZT1, UHMK1, CDK5R1, GIGYF2, ATF2, CEP126, KNL1, NEK7, CCNG1, PHIP, SKIL, SASS6, PRKAR1A, HMGN5, ATM, LEMD3, CHAMP1, BACH1, CHORDC1, EDN1, CDK1, ZFHX3, DDX3X, DNA2, BIRC6, USP33, SKP2, PPP1CC, NAA50, TOPBP1, FOXN3, CUL4B, CD2AP, AJUBA, NPAT, LRRCC1, ADAM17, NUP58, CDKN1B, CNOT8, KIF18A, PKD2, TOP2A, RINT1, CTNNB1, BRIP1, YWHAG, RB1,…	AURKC, LZTS1, CDK11A, WASL, SLX4, ZNF16, E2F8, FLNA, MRNIP, GAS2L1, MED25, FSD1, ID2, GAS6, FBXL15, RTEL1, CARM1, ABRAXAS2, ZFYVE26, WDR62, PLK3, ALMS1, SIN3A, INCENP, CLSPN, NEDD1, ARAP1, BRSK1, XPC
GO:0051493	regulation of cytoskeleton organization	286	5	1.17	15	0.00585	0.00585	0.975	1	Any process that modulates the frequency, rate or extent of the formation, arrangement of constituent parts, or disassembly of cytoskeletal structures	0.899491	-0.540162	SLAIN2, PHLDB2, TGFBR1, CLIC4, ARPC1B, XPO1, CDK5R1, ARHGAP18, ARF6, GMFB, CHORDC1, EDN1, SSH2, RICTOR, CD2AP, ARPC5, CDKN1B, KIF18A, MTPN, MYPN, CTNNB1, VPS4B, ROCK1, CAPZA1, PTK2, ARFIP1, BORA, FCHSD2, BAG4, PRKCE, FER, GEN1, ROCK2, SMAD3, PDCD6IP, SMAD4, BRCA1, CHMP2B, RANBP1, ABI2, SKA1	STMN3, CORO1A, WASL, CLIP3, TMOD1, ARHGDIA, ALMS1, FHOD3, ARAP1
GO:0032648	regulation of interferon-beta production	31	2	0.13	1286	0.00706	1	1	1	Any process that modulates the frequency, rate, or extent of interferon-beta production	0.384823	-0.216861	POLR3G, DDX3X
GO:0044033	multi-organism metabolic process	192	4	0.79	110	0.00757	0.03992	1	1	A metabolic process - chemical reactions and pathways, including anabolism and catabolism, by which living organisms transform chemical substances - which involves more than one organism	0.555742	-0.290287	RAB5A, CHD1, REST, NUP58, TOP2A, RPL21, ROCK2, GTF2F2, NUP160, POLR2K, RPS3A, RPS25, TRIM32, CCNT2, NUP155, NUCKS1
GO:0051297	centrosome organization	99	3	0.41	16	0.00759	0.00759	1	1	A process that is carried out at the cellular level which results in the assembly, arrangement of constituent parts, or disassembly of a centrosome, a structure comprised of a pair of centrioles and peri-centriolar material from which a microtubule spindle apparatus is organized	0.671245	-0.336854	XPO1, SASS6, CHORDC1, CDK1, SLC16A1, USP33, PCLAF, PKD2, CTNNB1, VPS4B, CCP110, PPP1R12A, GEN1, ROCK2, PDCD6IP, BRCA1, CHMP2B, CETN3, RANBP1	WDR62, PARD6A, BRSK1
GO:0032608	interferon-beta production	33	2	0.14	1287	0.00798	1	1	1	The appearance of interferon-beta due to biosynthesis or secretion following a cellular stimulus, resulting in an increase in its intracellular or extracellular levels	0.384823	-0.221194	POLR3G, DDX3X
GO:0043486	histone exchange	33	2	0.14	17	0.00798	0.00798	1	1	The replacement, within chromatin, of resident histones or histone subunits with alternative, sometimes variant, histones or subunits	0.5586	-0.0631698	CENPQ, KNL1, ANP32E, CENPK, ITGB3BP, MIS18BP1
GO:0003278	apoptotic process involved in heart morp...	2	1	0.01	18	0.00819	0.00819	1	1	Any apoptotic process that contributes to the shaping of the heart	0.368065	0.368065	CYR61
GO:0071651	positive regulation of chemokine (C-C mo...	2	1	0.01	19	0.00819	0.00819	1	1	Any process that activates or increases the frequency, rate, or extent of production of chemokine (C-C motif) ligand 5	0.415577	0.415577	DDX3X
GO:1904684	negative regulation of metalloendopeptid...	2	1	0.01	1288	0.00819	1	1	1		0.397477	0.397477	PICALM
GO:2001045	negative regulation of integrin-mediated...	2	1	0.01	20	0.00819	0.00819	1	1	Any process that stops, prevents or reduces the frequency, rate or extent of integrin-mediated signaling pathway	0.135288	0.135288	CTNNA1
GO:0051704	multi-organism process	1232	11	5.05	772	0.00832	0.36687	1	1	A biological process which involves another organism of the same or different species	1.03288	-1.18639	SMAD5, PKN2, AGFG1, CUL5, DDX20, SPIN4, ADAM9, QKI, TGFBR1, ERAP1, CLIC4, PARP11, CLOCK, TRAM1, XPO1, BNIP3L, ELMOD2, UBE2J1, KNL1, ASH1L, RPS6KA3, GJA1, TMED2, SKIL, ATM, ACOX1, LGR4, RAB5A, CCNI, KPNA3, CADM1, CREBZF, EDN1, DUSP10, CDK1, TUBD1, POLR3G, DDX3X, PSIP1, MORC3, FNDC3A, CHD1, DEK, RBPJ, CPS1, REST, ADAM17, NUP58, ACSL4, KPNA1, DSG2, CD24, SIRT1, TFPI, TOP2A, C5AR1, RPL21, AP1S2, CTNN…	HTRA1, SPP1, IGFBP7, FZD5, AURKC, NECTIN1, IGFBP2, CRTC1, WASL, ACTA2, TNFRSF25, RNF2, TYRO3, MGST1, ARID4B, ITGB3, GGNBP1, IL17RC, TRIM36, LRSAM1, AC138696.1, SMAD1, SRC, AMH, GAS6, KLC1, CARM1, SPHK2, TESK1, JUNB, IL6R, GBF1, KMT2B, IKBKG, VRK2, ZFP41, MTA1, SIN3A, TESK2, SBF1, RBCK1, PARD6A, ZNF35, STS, GNB1L, WDR33, ISG15
GO:0031023	microtubule organizing center organizati...	104	3	0.43	1289	0.0087	1	1	1	A process that is carried out at the cellular level which results in the assembly, arrangement of constituent parts, or disassembly of a microtubule organizing center, a structure from which microtubules grow	0.671245	-0.336854	XPO1, SASS6, CHORDC1, CDK1, SLC16A1, USP33, PCLAF, PKD2, CTNNB1, VPS4B, CCP110, PPP1R12A, GEN1, ROCK2, PDCD6IP, BRCA1, CHMP2B, CETN3, RANBP1	WDR62, PARD6A, BRSK1
GO:0010952	positive regulation of peptidase activit...	106	3	0.43	187	0.00916	0.06538	1	1	Any process that increases the frequency, rate or extent of peptidase activity, the hydrolysis of peptide bonds within proteins	0.570488	-0.291324	CARD8, DDX3X, REST, CDKN1B, PICALM, SIRT1, SENP1, EIF2AK3, ARL6IP5, SMAD3, CYR61, F2R
GO:0043902	positive regulation of multi-organism pr...	110	3	0.45	203	0.01013	0.06979	1	1	Any process that activates or increases the frequency, rate or extent of a multi-organism process, a process in which an organism has an effect on another organism of the same or different species	0.597968	-0.297538	PKN2, DDX3X, CHD1, TOP2A, VPS4B, YTHDC2, ANKRD17, TRAF6, GTF2F2, CHMP2B, POLR2K, NUCKS1	LRSAM1
GO:0006913	nucleocytoplasmic transport	328	5	1.35	993	0.01029	0.54659	1	1	The directed movement of molecules between the nucleus and the cytoplasm	0.937281	-0.424207	G3BP2, AGFG1, DDX20, WWTR1, TGFBR1, NMD3, XPO1, UHMK1, KPNA3, CTDSPL2, CDK1, PPP1CC, NUP58, KPNA1, RIOK2, PKD2, SIRT1, HEATR3, CTNNB1, THOC7, PPP1R12A, IPO7, SNAI2, SRSF1, FBXW11, PHAX, KHDRBS1, SOX4, TOB1, MAGOHB, SMAD3, SMAD4, NUP160, SNRPE, PBLD, RANBP1, RBM22, NSRP1, F2R, ZPR1, STRADB, NUP155, ABCE1	FLNA, GAS6, TONSL, RBCK1, WDR33
GO:0051726	regulation of cell cycle	760	8	3.12	21	0.01039	0.01039	1	1	Any process that modulates the rate or extent of progression through the cell cycle	0.997303	-0.640466	LIN9, PRKAA1, PKN2, CUL5, TIPRL, TGFBR1, CLOCK, XPO1, UHMK1, CDK5R1, GIGYF2, ATF2, KNL1, NEK7, CCNG1, PHIP, SKIL, PRKAR1A, HMGN5, ATM, CCNI, CHORDC1, EDN1, CDK1, ZFHX3, DDX3X, DNA2, BIRC6, SKP2, CDK15, FIGNL1, TOPBP1, FOXN3, CDK8, CUL4B, CCNC, PCLAF, ADAM17, CDKN1B, CNOT8, PKD2, SIRT1, TOP2A, RINT1, CTNNB1, BRIP1, RB1, VPS4B, CCP110, TAF1, CCNYL1, ANLN, CDC27, RAD21, CCNE2, MSX2, BORA, ANKRD17, K…	AURKC, CDK11A, ZNF16, E2F8, MNT, LIN37, PTCH1, TMEM8B, TRIM36, MRNIP, GAS2L1, SRC, MED25, ID2, GAS6, CARM1, JUNB, GBF1, PLK3, SIN3A, FLT3LG, CLSPN, BRSK1, XPC
GO:0051169	nuclear transport	335	5	1.37	1000	0.01121	0.55848	1	1	The directed movement of substances into, out of, or within the nucleus	0.937281	-0.424207	G3BP2, AGFG1, DDX20, WWTR1, TGFBR1, NMD3, XPO1, UHMK1, KPNA3, CTDSPL2, CDK1, PSIP1, PPP1CC, NUP58, KPNA1, RIOK2, PKD2, SIRT1, HEATR3, CTNNB1, THOC7, PPP1R12A, IPO7, SNAI2, SRSF1, FBXW11, PHAX, KHDRBS1, SOX4, TOB1, MAGOHB, SMAD3, SMAD4, NUP160, SNRPE, PBLD, RANBP1, RBM22, NSRP1, F2R, ZPR1, STRADB, NUP155, ABCE1	FLNA, GAS6, TONSL, RBCK1, WDR33
GO:0031623	receptor internalization	41	2	0.17	22	0.01214	0.01214	1	1	A receptor-mediated endocytosis process that results in the movement of receptors from the plasma membrane to the inside of the cell. The process begins when cell surface receptors are monoubiquitinated following ligand-induced activation. Receptors are subsequently taken up into endocytic vesicles from where they are either targeted to the lysosome or vacuole for degradation or recycled back to …	0.472548	-0.257553	GTF2H2, RAB5A, PICALM	RAB31
GO:0016188	synaptic vesicle maturation	3	1	0.01	23	0.01226	0.01226	1	1	Steps required to form an initiated synaptic vesicle into a fully formed and transmissible synaptic vesicle	0.165787	0.165787	PICALM
GO:0021683	cerebellar granular layer morphogenesis	3	1	0.01	1290	0.01226	1	1	1	The process in which the anatomical structure of the cerebellar granular layer is generated and organized. The granular layer is the innermost layer of the cerebellar cortex. This layer contains densely packed small neurons, mostly granule cells. Some Golgi cells are found at the outer border. Granule neurons send parallel fibers to the upper molecular layer, where they synapse with Purkinje cell…	0.333558	0.333558	MTPN
GO:0030263	apoptotic chromosome condensation	3	1	0.01	24	0.01226	0.01226	1	1	The compaction of chromatin during apoptosis	0.271567	0.271567	TOP2A
GO:0032241	positive regulation of nucleobase-contai...	3	1	0.01	25	0.01226	0.01226	1	1	Any process that activates or increases the frequency, rate or extent of the directed movement of nucleobases, nucleosides, nucleotides and nucleic acids, into, out of or within a cell, or between cells, by means of some agent such as a transporter or pore	0.489015	0.489015	RIOK2, KHDRBS1
GO:0034421	post-translational protein acetylation	3	1	0.01	26	0.01226	0.01226	1	1	The addition of an acetyl group to one or more amino acids in a protein, occurring after the protein has been completely translated and released from the ribosome	0.502764	0.502764	DSCC1, ESCO2
GO:0046604	positive regulation of mitotic centrosom...	3	1	0.01	27	0.01226	0.01226	1	1	Any process that activates or increases the frequency, rate or extent of centrosome separation	0.109072	0.109072	RANBP1
GO:0046833	positive regulation of RNA export from n...	3	1	0.01	28	0.01226	0.01226	1	1	Any process that activates or increases the frequency, rate or extent of directed movement of RNA from the nucleus into the cytoplasm	0.489015	0.489015	RIOK2, KHDRBS1
GO:0060591	chondroblast differentiation	3	1	0.01	29	0.01226	0.01226	1	1	The process in which a mesenchymal cell, acquires specialized structural and/or functional features of a chondroblast. Differentiation includes the processes involved in commitment of a cell to a chondroblast fate. A chondroblast is a precursor cell to chondrocytes	0.275242	0.275242	FGF2, CYR61
GO:0060710	chorio-allantoic fusion	3	1	0.01	30	0.01226	0.01226	1	1	The cell-cell adhesion process in which the cells of the chorion fuse to the cells of the allantois	0.24102	0.24102	CYR61
GO:0071649	regulation of chemokine (C-C motif) liga...	3	1	0.01	1291	0.01226	1	1	1	Any process that modulates the frequency, rate, or extent of production of chemokine (C-C motif) ligand 5	0.221984	0.221984	DDX3X
GO:0090521	glomerular visceral epithelial cell migr...	3	1	0.01	31	0.01226	0.01226	1	1	The orderly movement of a podocyte from one site to another, often during the development of a multicellular organism or multicellular structure. A podocyte is a specialized kidney epithelial cell	0.150072	0.150072	ANLN
GO:1902004	positive regulation of beta-amyloid form...	3	1	0.01	32	0.01226	0.01226	1	1	Any process that activates or increases the frequency, rate or extent of beta-amyloid formation	0.145672	0.145672	PICALM
GO:1902993	positive regulation of amyloid precursor...	3	1	0.01	33	0.01226	0.01226	1	1	Any process that activates or increases the frequency, rate or extent of amyloid precursor protein catabolic process	0.145672	0.145672	PICALM
GO:1904683	regulation of metalloendopeptidase activ...	3	1	0.01	1292	0.01226	1	1	1		0.219064	0.219064	PICALM
GO:2000286	receptor internalization involved in can...	3	1	0.01	34	0.01226	0.01226	1	1	A receptor internalization process that contributes to canonical Wnt signaling pathway	0.418703	0.418703	RAB5A
GO:0046605	regulation of centrosome cycle	42	2	0.17	35	0.01271	0.01271	1	1	Any process that modulates the frequency, rate or extent of the centrosome cycle, the processes of centrosome duplication and separation	0.517319	-0.141937	XPO1, CHORDC1, VPS4B, GEN1, ROCK2, PDCD6IP, BRCA1, CHMP2B, RANBP1
GO:1901566	organonitrogen compound biosynthetic pro...	961	9	3.94	191	0.01342	0.06657	1	1	The chemical reactions and pathways resulting in the formation of organonitrogen compound	0.976362	-0.647176	SERP1, PRKAA1, SGMS1, DCK, SECISBP2L, QKI, GTF2H2, UHMK1, GIGYF2, UGDH, RPS6KA3, MRPS18C, RBMS3, ST6GALNAC5, UGCG, SLC26A2, CSGALNACT2, SRP9, EEF2K, EDN1, CPOX, DDX3X, EEF1E1, PRTFDC1, B4GALT6, ADSS, VCAN, CPS1, RPL22L1, IREB2, AJUBA, CNOT8, MTPN, CMPK1, DSE, RPL21, MRPL33, PANK3, DDX6, AGO2, EXT1, CELF1, GCLC, EIF4G3, DPYD, SLC1A3, PRPS2, RFK, GPC2, DENR, PTCD3, NAALAD2, CHAC2, FXR1, EIF2AK3, KH…	LTB4R2, B3GNT3, CHCHD10, LCMT2, GSTM4, MGST1, IBA57, SMAD1, SLC26A1, SPHK2, NAPRT, AASDH, CHPF, GPC1, AGRN, NUDT12, PYCR1, ME1, VPS9D1, NDST2
GO:1903900	regulation of viral life cycle	126	3	0.52	249	0.01462	0.08837	1	1		0.608221	-0.294095	PKN2, DDX3X, CHD1, REST, TOP2A, VPS4B, YTHDC2, GTF2F2, CHMP2B, POLR2K, TRIM32, NUCKS1	ISG15
GO:0030036	actin cytoskeleton organization	359	5	1.47	36	0.01479	0.01479	1	1	A process that is carried out at the cellular level which results in the assembly, arrangement of constituent parts, or disassembly of cytoskeletal structures comprising actin filaments and their associated proteins	0.871591	-0.553502	PHLDB2, COBLL1, TGFBR1, MAP3K1, ARPC1B, CDK5R1, ARHGAP18, ARF6, MAP3K2, PRKAR1A, GMFB, EDN1, SSH2, MYO1B, CORO2A, RICTOR, PARVA, CD2AP, MARCKS, ARPC5, GAS2L3, MTPN, MYPN, OPHN1, ROCK1, PRKCI, PLS3, CAPZA1, ARFIP1, KRAS, EPB41L2, FCHSD2, BAG4, PRKCE, PRKG1, FER, RACGAP1, ROCK2, SMAD3, PDCD6IP, SMAD4, EPB41L4A, CTNNA1, ABI2, CNN3, MYOM2, TRIM32, TTC17	CORO1A, WASL, FLNA, MKLN1, SRC, INF2, TMOD1, ATP2C1, ARHGDIA, ALMS1, FHOD3, TESK2, ARAP1
GO:0006383	transcription from RNA polymerase III pr...	46	2	0.19	37	0.01512	0.01512	1	1	The synthesis of RNA from a DNA template by RNA polymerase III, originating at an RNAP III promoter	0.431152	-0.290607	POLR3G, ZC3H8, POLR3K, BRCA1, POLR2K	BRF1, SNAPC4
GO:0051028	mRNA transport	129	3	0.53	38	0.01556	0.01556	1	1	The directed movement of mRNA, messenger ribonucleic acid, into, out of or within a cell, or between cells, by means of some agent such as a transporter or pore	0.843051	-0.291213	NXT2, G3BP2, AGFG1, QKI, PARP11, XPO1, HNRNPA3, NUP58, THOC7, SRSF1, SENP2, MAGOHB, NUP160, IGF2BP3, KIF5C, NUP155	WDR33
GO:0007406	negative regulation of neuroblast prolif...	4	1	0.02	39	0.01631	0.01631	1	1	Any process that stops, prevents, or reduces the frequency, rate or extent of the proliferation of neuroblasts	-0.189688	-0.189688	CTNNA1	KCTD11
GO:0016338	calcium-independent cell-cell adhesion v...	4	1	0.02	40	0.01631	0.01631	1	1	The attachment of one cell to another cell via adhesion molecules that do not require the presence of calcium for the interaction	0.291723	0.291723	CLDN12, CLDN11
GO:0021681	cerebellar granular layer development	4	1	0.02	1293	0.01631	1	1	1	The process whose specific outcome is the progression of the cerebellar granule layer over time, from its formation to the mature structure. The granular layer is the innermost layer of the cerebellar cortex. This layer contains densely packed small neurons, mostly granule cells. Some Golgi cells are found at the outer border. Granule neurons send parallel fibers to the upper molecular layer, whe…	0.240485	0.240485	MTPN
GO:0032780	negative regulation of ATPase activity	4	1	0.02	41	0.01631	0.01631	1	1	Any process that stops or reduces the rate of ATP hydrolysis by an ATPase	0.0922899	0.0922899	CNN3
GO:0045091	regulation of single stranded viral RNA ...	4	1	0.02	1294	0.01631	1	1	1	Any process that modulates the frequency, rate or extent of single stranded viral RNA replication via double stranded DNA intermediate	-0.0129087	-0.0129087	TOP2A
GO:0071609	chemokine (C-C motif) ligand 5 productio...	4	1	0.02	1295	0.01631	1	1	1	The appearance of chemokine (C-C motif) ligand 5 due to biosynthesis or secretion following a cellular stimulus, resulting in an increase in its intracellular or extracellular levels	0.19403	0.19403	DDX3X
GO:0071680	response to indole-3-methanol	4	1	0.02	42	0.01631	0.01631	1	1	Any process that results in a change in state or activity of a cell or an organism (in terms of movement, secretion, enzyme production, gene expression, etc.) as a result of an indole-3-methanol stimulus	0.295143	0.295143	CTNNB1, BRCA1, CTNNA1
GO:0071681	cellular response to indole-3-methanol	4	1	0.02	43	0.01631	0.01631	1	1	Any process that results in a change in state or activity of a cell (in terms of movement, secretion, enzyme production, gene expression, etc.) as a result of an indole-3-methanol stimulus	0.295143	0.295143	CTNNB1, BRCA1, CTNNA1
GO:0097459	iron ion import into cell	4	1	0.02	44	0.01631	0.01631	1	1	The directed movement of iron ions from outside of a cell into the cytoplasmic compartment. This may occur via transport across the plasma membrane or via endocytosis	0.0643006	0.0643006	PICALM
GO:1905049	negative regulation of metallopeptidase ...	4	1	0.02	1296	0.01631	1	1	1		0.189354	0.189354	PICALM
GO:2000812	regulation of barbed-end actin filament ...	4	1	0.02	45	0.01631	0.01631	1	1	Any process that modulates the frequency, rate or extent of barbed-end actin filament capping	0.269293	0.269293	MTPN
GO:0046822	regulation of nucleocytoplasmic transpor...	133	3	0.55	46	0.01688	0.01688	1	1	Any process that modulates the frequency, rate or extent of the directed movement of substances between the nucleus and the cytoplasm	0.812924	-0.419609	G3BP2, WWTR1, TGFBR1, XPO1, UHMK1, CTDSPL2, CDK1, PPP1CC, NUP58, RIOK2, PKD2, SIRT1, PPP1R12A, SNAI2, FBXW11, KHDRBS1, SOX4, SMAD3, SMAD4, PBLD, ZPR1	FLNA, GAS6, TONSL, RBCK1
GO:0071840	cellular component organization or bioge...	3975	23	16.31	758	0.01895	0.35302	1	1	A process that results in the biosynthesis of constituent macromolecules, assembly, arrangement of constituent parts, or disassembly of a cellular component	1.1793	-1.64353	MIGA1, GDAP1, PRKAR2B, IL1RAP, SLAIN2, SERP1, G3BP2, PRKAA1, PKN2, ASCC3, CRIM1, DENND6A, AGFG1, SH3D19, ATAD2B, TIMM17A, PTPRG, DDX20, PRPF39, CENPQ, CHML, WWTR1, PHLDB2, ADAM9, COBLL1, TGFBR1, DSCC1, GTF2H2, FAM126A, CLIC4, KLF5, PARP11, NMD3, CLOCK, MAP3K1, ARPC1B, XPO1, MZT1, SRGAP2C, PEX11A, STAM, BNIP3L, UHMK1, CDK5R1, DNAAF4, ATF2, CEP126, TRAPPC13, TRNT1, KNL1, ASH1L, NUDT21, NAP1L3, NEK7…	CRYAB, HTRA1, SPP1, PANX2, IGFBP7, OSGIN1, FZD5, CNIH2, HMOX1, AURKC, GRWD1, ITGB4, SEMA6C, LZTS1, CDK11A, STMN3, ADAMTSL4, NECTIN1, CORO1A, RAB4B-EGLN2, EHD3, OMA1, PIF1, IGFBP2, BOC, CRTC1, CHCHD10, PILRB, COL6A2, KIF13B, WASL, SLX4, PPIL2, RIOX1, PLEKHF1, EFNB1, ABCA7, C1QL1, RNF2, RRP7BP, PLTP, TYRO3, PLXNB3, MTREX, MGST1, TBC1D3L, ISL2, MYO7B, CBFA2T2, SEC24B, FLNA, ARID4B, ADAMTS16, RABGAP1…
GO:0043044	ATP-dependent chromatin remodeling	52	2	0.21	1297	0.01908	1	1	1	Dynamic structural changes to eukaryotic chromatin that require energy from the hydrolysis of ATP, ranging from local changes necessary for transcriptional regulation to global changes necessary for chromosome segregation, mediated by ATP-dependent chromatin-remodelling factors	0.571095	-0.143506	CENPQ, KNL1, ANP32E, CENPK, ITGB3BP, MIS18BP1, SMARCE1
GO:0045069	regulation of viral genome replication	52	2	0.21	494	0.01908	0.18489	1	1	Any process that modulates the frequency, rate or extent of viral genome replication	0.455798	-0.242684	PKN2, DDX3X, TOP2A, YTHDC2, NUCKS1	ISG15
GO:0016264	gap junction assembly	5	1	0.02	47	0.02035	0.02035	1	1	Assembly of gap junctions, which are found in most animal tissues, and serve as direct connections between the cytoplasms of adjacent cells. They provide open channels through the plasma membrane, allowing ions and small molecules (less than approximately a thousand daltons) to diffuse freely between neighboring cells, but preventing the passage of proteins and nucleic acids	0.352927	0.352927	GJA1, CTNNA1
GO:0021533	cell differentiation in hindbrain	5	1	0.02	1298	0.02035	1	1	1	The process in which relatively unspecialized cells acquire specialized structural and/or functional features that characterize the mature cells of the hindbrain. Differentiation includes the processes involved in commitment of a cell to a specific fate	0.104032	0.104032	MTPN
GO:0033690	positive regulation of osteoblast prolif...	5	1	0.02	48	0.02035	0.02035	1	1	Any process that activates or increases the rate or extent of osteoblast proliferation	0.0750513	0.0750513	ITGAV, CYR61
GO:0051036	regulation of endosome size	5	1	0.02	49	0.02035	0.02035	1	1	Any process that modulates the volume of an endosome, a membrane-bounded organelle that carries materials newly ingested by endocytosis	0.178102	0.178102	RAB5A, ALS2
GO:1902992	negative regulation of amyloid precursor...	5	1	0.02	1299	0.02035	1	1	1	Any process that stops, prevents or reduces the frequency, rate or extent of amyloid precursor protein catabolic process	-0.0967395	-0.0967395	PICALM	ABCA7
GO:2000647	negative regulation of stem cell prolife...	5	1	0.02	50	0.02035	0.02035	1	1	Any process that stops, prevents or reduces the frequency, rate or extent of stem cell proliferation	-0.0495531	-0.0495531	SNAI2, CTNNA1	KCTD11
GO:0075733	intracellular transport of virus	54	2	0.22	52	0.02049	0.02049	1	1	The directed movement of a virus, or part of a virus, within the host cell	0.533517	-0.182013	XPO1, KPNA3, NUP58, KPNA1, THOC7, NUP160, NUP155
GO:0010942	positive regulation of cell death	391	5	1.6	53	0.02068	0.02068	1	1	Any process that increases the rate or frequency of cell death. Cell death is the specific activation or halting of processes within a cell so that its vital functions markedly cease, rather than simply deteriorating gradually over time, which culminates in cell death	0.819146	-0.730423	DDX20, TGFBR1, BNIP3L, CDK5R1, ATF2, SKIL, ATM, RARB, CARD8, DDX3X, EEF1E1, TNFAIP8, REST, FNIP1, CDKN1B, PICALM, SIRT1, TOP2A, CTNNB1, YWHAG, CYP1B1, ZC3H8, SENP1, NET1, PRKCI, MSX2, SUDS3, DNAJA1, EIF2AK3, ITGB3BP, SOX4, ARL6IP5, SMAD3, CYR61, EIF2S1, TRAF6, MAP3K20, ITGA6, FOXO3, SFPQ, CTNNA1, SIAH1, TIAM1, F2R, WNT5A, STK3	OSGIN1, HMOX1, PLEKHG5, ADAMTSL4, PLEKHF1, MAP3K10, MAP3K9, CD274, SRC, CLIP3, COL18A1, NQO1, RBCK1
GO:0030029	actin filament-based process	392	5	1.61	54	0.02088	0.02088	1	1	Any cellular process that depends upon or alters the actin cytoskeleton, that part of the cytoskeleton comprising actin filaments and their associated proteins	0.874698	-0.581074	PHLDB2, COBLL1, TGFBR1, MAP3K1, ARPC1B, CDK5R1, ARHGAP18, GJA1, ARF6, MAP3K2, PRKAR1A, GMFB, EDN1, SSH2, MYO1B, DSC2, CORO2A, RICTOR, PARVA, CD2AP, MARCKS, ARPC5, GAS2L3, DSG2, MTPN, MYPN, MYO5A, OPHN1, ROCK1, PRKCI, PLS3, CAPZA1, ARFIP1, KRAS, EPB41L2, FCHSD2, BAG4, PRKCE, PRKG1, FER, RACGAP1, ROCK2, SMAD3, PDCD6IP, SMAD4, EPB41L4A, CTNNA1, ABI2, CNN3, MYOM2, TRIM32, TTC17, NUP155	CORO1A, TRPM4, WASL, FLNA, MKLN1, SRC, INF2, TMOD1, ATP2C1, ARHGDIA, SCN1B, MYO6, ALMS1, FHOD3, TESK2, ARAP1
GO:1902581	multi-organism cellular localization	55	2	0.23	55	0.02121	0.02121	1	1	A cellular localization which involves another organism	0.533517	-0.182013	XPO1, KPNA3, NUP58, KPNA1, THOC7, NUP160, NUP155
GO:1902583	multi-organism intracellular transport	55	2	0.23	56	0.02121	0.02121	1	1	An intracellular transport which involves another organism	0.533517	-0.182013	XPO1, KPNA3, NUP58, KPNA1, THOC7, NUP160, NUP155
GO:0042752	regulation of circadian rhythm	56	2	0.23	57	0.02194	0.02194	1	1	Any process that modulates the frequency, rate or extent of a circadian rhythm. A circadian rhythm is a biological process in an organism that recurs with a regularity of approximately 24 hours	0.719694	-0.364155	PRKAA1, PPP1CB, FBXL3, NR1D2, ZFHX3, PPP1CC, TOP2A, OPN3, FBXW11, ROCK2, SFPQ	CRTC1, ID2, MTA1, SIN3A
GO:0034654	nucleobase-containing compound biosynthe...	2642	17	10.84	58	0.0225	0.0225	1	1	The chemical reactions and pathways resulting in the formation of nucleobases, nucleosides, nucleotides and nucleic acids	1.14458	-1.24117	UFL1, LIN9, IL1RAP, SMAD5, PRKAA1, PKN2, ASCC3, ATAD2B, GDF6, DDX20, STRN3, UBE2D2, WWTR1, DCK, TGFBR1, DSCC1, GTF2H2, KLF5, NMD3, CLOCK, ZRANB2, HOXA3, XPO1, CDK5R1, ATF2, ASH1L, NUDT21, ZNF618, NEK7, UGDH, RPS6KA3, FUBP3, EID1, RMI1, GJA1, TDG, PHIP, MAP3K2, MED13, PHF6, SKIL, NUFIP1, ELAVL2, TNKS2, PRKAR1A, HMGN5, ATM, FOSL2, ARMCX3, CAND1, RNF6, LGR4, SLC26A2, RARB, LEMD3, BACH1, CTDSPL2, MYB…	HTRA1, SPP1, FZD5, HOXB9, HMOX1, LTB4R2, MIER3, LZTS1, CDK11A, DYRK1B, ZNF41, ZNF17, ZNF512B, PIF1, CRTC1, CHCHD10, ZNF777, ZNF219, ZBTB7A, ZNF480, WASL, ZNF85, ZNF446, RIOX1, ZNF16, EFEMP1, MAP3K10, RNF2, MAP3K9, ZBTB45, E2F8, ISL2, ZNF213, CBFA2T2, FLNA, ARID4B, MNT, MED26, ZNF414, MZF1, PTCH1, NRF1, YAP1, ZNF142, ZNF329, ZNF200, AC138696.1, ZNF669, ZNF567, HOXB6, SMAD1, FOXO6, SRC, MED25, ID2,…
GO:0046794	transport of virus	57	2	0.23	59	0.02268	0.02268	1	1	The directed movement of a virus, or part of a virus, into, out of, or within a host cell	0.533517	-0.189145	XPO1, KPNA3, NUP58, KPNA1, THOC7, NUP160, NUP155
GO:0000056	ribosomal small subunit export from nucl...	6	1	0.02	60	0.02437	0.02437	1	1	The directed movement of a ribosomal small subunit from the nucleus into the cytoplasm	0.258368	0.258368	XPO1, RIOK2
GO:0021697	cerebellar cortex formation	6	1	0.02	1300	0.02437	1	1	1	The process that gives rise to the cerebellar cortex. This process pertains to the initial formation of a structure from unspecified parts. The cerebellar cortex is a thin mantle of gray matter that covers the surface of each cerebral hemisphere. It has a characteristic morphology with convolutions (gyri) and crevices (sulci) that have specific functions. Six layers of nerve cells and the nerve p…	0.0338313	0.0338313	MTPN
GO:0039692	single stranded viral RNA replication vi...	6	1	0.02	1301	0.02437	1	1	1	A viral genome replication where the template is single-stranded RNA (ssRNA), and which proceeds via a double stranded DNA (dsDNA) intermediate molecule. Viral genomic RNA is first reverse transcribed into dsDNA, which integrates into the host chromosomal DNA, where it is transcribed by host RNA polymerase II	-0.0261374	-0.0261374	TOP2A
GO:0042256	mature ribosome assembly	6	1	0.02	61	0.02437	0.02437	1	1	The aggregation, arrangement and bonding together of the large and small ribosomal subunits into a functional ribosome	0.0877284	0.0877284	DDX3X
GO:1900262	regulation of DNA-directed DNA polymeras...	6	1	0.02	62	0.02437	0.02437	1	1	Any process that modulates the frequency, rate or extent of DNA-directed DNA polymerase activity	0.22418	0.22418	DSCC1, RFC3
GO:1900264	positive regulation of DNA-directed DNA ...	6	1	0.02	63	0.02437	0.02437	1	1	Any process that activates or increases the frequency, rate or extent of DNA-directed DNA polymerase activity	0.22418	0.22418	DSCC1, RFC3
GO:1902003	regulation of beta-amyloid formation	6	1	0.02	64	0.02437	0.02437	1	1	Any process that modulates the frequency, rate or extent of beta-amyloid formation	-0.0282013	-0.0282013	PICALM	ABCA7
GO:2000601	positive regulation of Arp2/3 complex-me...	6	1	0.02	65	0.02437	0.02437	1	1	Any process that activates or increases the frequency, rate or extent of Arp2/3 complex-mediated actin nucleation	0.0663996	0.0663996	ABI2	WASL
GO:0000377	RNA splicing, via transesterification re...	275	4	1.13	66	0.0253	0.0253	1	1	Splicing of RNA via a series of two transesterification reactions with a bulged adenosine residue from the intron branch point as the initiating nucleophile. When the initial RNA for the splicing reaction is a single molecule (cis splicing), the excised intron is released in a lariat structure	0.772504	-0.429201	DDX20, PRPF39, MBNL2, NUDT21, ELAVL2, PSIP1, LSM5, HNRNPA3, PTBP2, PNN, CELF1, WTAP, SRSF1, YTHDC1, KHDRBS1, DYRK1A, CWC15, MAGOHB, RNPC3, PAPOLA, GTF2F2, SNRPE, SFPQ, POLR2K, CWC27, RBM22, NSRP1, PPIL1	MTREX, AC009690.3, SRPK3, PRPF40B, WDR33
GO:0000398	mRNA splicing, via spliceosome	275	4	1.13	67	0.0253	0.0253	1	1	The joining together of exons from one or more primary transcripts of messenger RNA (mRNA) and the excision of intron sequences, via a spliceosomal mechanism, so that mRNA consisting only of the joined exons is produced	0.772504	-0.429201	DDX20, PRPF39, MBNL2, NUDT21, ELAVL2, PSIP1, LSM5, HNRNPA3, PTBP2, PNN, CELF1, WTAP, SRSF1, YTHDC1, KHDRBS1, DYRK1A, CWC15, MAGOHB, RNPC3, PAPOLA, GTF2F2, SNRPE, SFPQ, POLR2K, CWC27, RBM22, NSRP1, PPIL1	MTREX, AC009690.3, SRPK3, PRPF40B, WDR33
GO:0002244	hematopoietic progenitor cell differenti...	61	2	0.25	68	0.02574	0.02574	1	1	The process in which precursor cell type acquires the specialized features of a hematopoietic progenitor cell, a class of cell types including myeloid progenitor cells and lymphoid progenitor cells	0.530452	-0.353533	FST, REST, ESCO2, FNIP1, TOP2A, ANLN, AGPAT5, SOX4, ZBTB24	CEBPD, SIN3A
GO:0044766	multi-organism transport	61	2	0.25	69	0.02574	0.02574	1	1	The directed movement of substances (such as macromolecules, small molecules, ions) into, out of or within a cell, or between cells, or within a multicellular organism by means of some agent such as a transporter or pore, involving more than one organism	0.535151	-0.189145	XPO1, KPNA3, NUP58, KPNA1, THOC7, NUP160, NUP155
GO:1902579	multi-organism localization	61	2	0.25	70	0.02574	0.02574	1	1	A localization which involves another organism	0.535151	-0.189145	XPO1, KPNA3, NUP58, KPNA1, THOC7, NUP160, NUP155
GO:0019438	aromatic compound biosynthetic process	2683	17	11.01	72	0.02614	0.02614	1	1	The chemical reactions and pathways resulting in the formation of aromatic compounds, any substance containing an aromatic carbon ring	1.14458	-1.24117	UFL1, LIN9, IL1RAP, SMAD5, PRKAA1, PKN2, ASCC3, ATAD2B, GDF6, DDX20, STRN3, UBE2D2, WWTR1, DCK, TGFBR1, DSCC1, GTF2H2, KLF5, NMD3, CLOCK, ZRANB2, HOXA3, XPO1, CDK5R1, ATF2, ASH1L, NUDT21, ZNF618, NEK7, UGDH, RPS6KA3, FUBP3, EID1, RMI1, GJA1, TDG, PHIP, MAP3K2, MED13, PHF6, SKIL, NUFIP1, ELAVL2, TNKS2, PRKAR1A, HMGN5, ATM, FOSL2, ARMCX3, CAND1, RNF6, LGR4, SLC26A2, RARB, LEMD3, BACH1, CTDSPL2, MYB…	HTRA1, SPP1, FZD5, HOXB9, HMOX1, LTB4R2, MIER3, LZTS1, CDK11A, DYRK1B, ZNF41, ZNF17, ZNF512B, PIF1, CRTC1, CHCHD10, ZNF777, ZNF219, ZBTB7A, ZNF480, WASL, ZNF85, ZNF446, RIOX1, ZNF16, EFEMP1, MAP3K10, RNF2, MAP3K9, ZBTB45, E2F8, ISL2, ZNF213, CBFA2T2, FLNA, ARID4B, MNT, MED26, ZNF414, MZF1, PTCH1, IBA57, NRF1, YAP1, ZNF142, ZNF329, ZNF200, AC138696.1, ZNF669, ZNF567, HOXB6, SMAD1, FOXO6, SRC, MED2…
GO:0006446	regulation of translational initiation	62	2	0.25	1302	0.02653	1	1	1	Any process that modulates the frequency, rate or extent of translational initiation	0.508859	-0.23485	UHMK1, DDX3X, AGO2, EIF4G3, EIF2AK3, KHDRBS1, EIF2S1
GO:0018130	heterocycle biosynthetic process	2689	17	11.03	73	0.02671	0.02671	1	1	The chemical reactions and pathways resulting in the formation of heterocyclic compounds, those with a cyclic molecular structure and at least two different atoms in the ring (or rings)	1.14458	-1.24117	UFL1, LIN9, IL1RAP, SMAD5, PRKAA1, PKN2, ASCC3, ATAD2B, GDF6, DDX20, STRN3, UBE2D2, WWTR1, DCK, TGFBR1, DSCC1, GTF2H2, KLF5, NMD3, CLOCK, ZRANB2, HOXA3, XPO1, CDK5R1, ATF2, ASH1L, NUDT21, ZNF618, NEK7, UGDH, RPS6KA3, FUBP3, EID1, RMI1, GJA1, TDG, PHIP, MAP3K2, MED13, PHF6, SKIL, NUFIP1, ELAVL2, TNKS2, PRKAR1A, HMGN5, ATM, FOSL2, ARMCX3, CAND1, RNF6, LGR4, SLC26A2, RARB, LEMD3, BACH1, CTDSPL2, MYB…	HTRA1, SPP1, FZD5, HOXB9, HMOX1, LTB4R2, MIER3, LZTS1, CDK11A, DYRK1B, ZNF41, ZNF17, ZNF512B, PIF1, CRTC1, CHCHD10, ZNF777, ZNF219, ZBTB7A, ZNF480, WASL, ZNF85, ZNF446, RIOX1, ZNF16, EFEMP1, MAP3K10, RNF2, MAP3K9, PLTP, ZBTB45, E2F8, ISL2, ZNF213, CBFA2T2, FLNA, ARID4B, MNT, MED26, ZNF414, MZF1, PTCH1, IBA57, NRF1, YAP1, ZNF142, ZNF329, ZNF200, AC138696.1, ZNF669, ZNF567, HOXB6, SMAD1, FOXO6, SRC…
GO:0042254	ribosome biogenesis	281	4	1.15	74	0.02712	0.02712	1	1	A cellular process that results in the biosynthesis of constituent macromolecules, assembly, and arrangement of constituent parts of ribosome subunits; includes transport to the sites of protein synthesis	0.684079	-0.445925	NMD3, XPO1, ERI2, C1D, DDX3X, RIOK2, SIRT1, HEATR3, UTP23, RPL21, WDR43, RPS3A, RPS25, RPF1, NOL11, PA2G4, ABCE1, ERI1	RRP7BP, MTREX, EMG1, TBL3, GNL3L
GO:0000055	ribosomal large subunit export from nucl...	7	1	0.03	75	0.02838	0.02838	1	1	The directed movement of a ribosomal large subunit from the nucleus into the cytoplasm	0.336952	0.336952	NMD3, XPO1
GO:0040016	embryonic cleavage	7	1	0.03	76	0.02838	0.02838	1	1	The first few specialized divisions of an activated animal egg	0.137939	0.137939	TOP2A, TOP1
GO:0045019	negative regulation of nitric oxide bios...	7	1	0.03	77	0.02838	0.02838	1	1	Any process that stops, prevents, or reduces the frequency, rate or extent of the chemical reactions and pathways resulting in the formation of nitric oxide	-0.0739282	-0.0739282		CD34
GO:0046602	regulation of mitotic centrosome separat...	7	1	0.03	78	0.02838	0.02838	1	1	Any process that modulates the frequency, rate or extent of the separation of duplicated centrosome components at the beginning of mitosis	0.140832	0.140832	RANBP1
GO:0046784	viral mRNA export from host cell nucleus	7	1	0.03	79	0.02838	0.02838	1	1	The directed movement of intronless viral mRNA from the host nucleus to the cytoplasm for translation	0.105574	0.105574	THOC7
GO:0061299	retina vasculature morphogenesis in came...	7	1	0.03	80	0.02838	0.02838	1	1	The process in which the vasculature of the retina is generated and organized	0.119137	0.119137	CLIC4, CYP1B1
GO:0090154	positive regulation of sphingolipid bios...	7	1	0.03	81	0.02838	0.02838	1	1	Any process that increases the rate, frequency or extent of sphingolipid biosynthesis. Sphingolipid biosynthesis is the chemical reactions and pathways resulting in the formation of sphingolipids, any of a class of lipids containing the long-chain amine diol sphingosine or a closely related base (a sphingoid)	0.0549549	0.0549549	CYR61
GO:0097286	iron ion import	7	1	0.03	82	0.02838	0.02838	1	1	The directed movement of iron ions into a cell or organelle	-0.0350955	-0.0350955	PICALM	FTH1
GO:1903608	protein localization to cytoplasmic stre...	7	1	0.03	83	0.02838	0.02838	1	1		0.190347	0.190347	DDX3X
GO:1904406	negative regulation of nitric oxide meta...	7	1	0.03	84	0.02838	0.02838	1	1		-0.0739282	-0.0739282		CD34
GO:2000304	positive regulation of ceramide biosynth...	7	1	0.03	85	0.02838	0.02838	1	1	Any process that activates or increases the frequency, rate or extent of ceramide biosynthetic process	0.0549549	0.0549549	CYR61
GO:2000628	regulation of miRNA metabolic process	7	1	0.03	86	0.02838	0.02838	1	1	Any process that modulates the frequency, rate or extent of miRNA metabolic process	0.0701729	0.0701729
GO:0010629	negative regulation of gene expression	1098	9	4.5	87	0.02978	0.02978	1	1	Any process that decreases the frequency, rate or extent of gene expression. Gene expression is the process in which a gene's coding sequence is converted into a mature gene product or products (proteins or RNA). This includes the production of an RNA transcript as well as any processing to produce a mature RNA product or an mRNA (for protein-coding genes) and the translation of that mRNA into pr…	0.958331	-0.620504	ATAD2B, DDX20, STRN3, WWTR1, QKI, KLF5, CLOCK, XPO1, CDK5R1, GIGYF2, ATF2, EID1, TDG, SKIL, ATM, LGR4, RARB, BACH1, SRP9, CREBZF, C1D, EDN1, KLF4, TCERG1, BMI1, NR1D2, ZFHX3, DDX3X, KAT6A, RBPJ, FST, NDFIP2, FOXN3, DLX1, LSM5, NFIB, ATP8B1, TRIM24, MIER1, REST, IREB2, AJUBA, SUZ12, NUP58, FNIP1, CDKN1B, CNOT8, PICALM, TBL1XR1, ZBTB18, ASF1A, SIRT1, ZNF675, PTBP2, ZNF552, RPL21, CTNNB1, BRIP1, RB1…	ZNF219, ZBTB7A, RIOX1, MAP3K10, RNF2, E2F8, CBFA2T2, FLNA, MNT, MZF1, PTCH1, ZNF567, SMAD1, SRC, MED25, ID2, ZEB1, GAS6, ZKSCAN3, JUNB, ZNF500, AXIN1, MXD4, KMT2B, CEBPD, RBAK, PLK3, HIC2, SIN3A, CD34, DHX34, CTNNBIP1, SCX, ZFP90, GLI2, GLIS2, CC2D1A, EPC1
GO:0048511	rhythmic process	170	3	0.7	88	0.03196	0.03196	1	1	Any process pertinent to the generation and maintenance of rhythms in the physiology of an organism	0.833906	-0.49096	PRKAA1, PPP1CB, CLOCK, CDK5R1, FBXL3, ATM, LGR4, NR1D2, ZFHX3, PPP1CC, SIRT1, TOP2A, OPN3, FBXW11, DYRK1A, TOP1, AHR, ROCK2, TAF4, NCOA2, KAT2B, ADAMTS1, SMAD4, FOXO3, SFPQ, CTNNA1	CRTC1, TYRO3, ID2, AMH, KMT2B, DBP, MTA1, SIN3A
GO:0001886	endothelial cell morphogenesis	8	1	0.03	89	0.03237	0.03237	1	1	The change in form (cell shape and size) that occurs during the differentiation of an endothelial cell	0.0999894	0.0999894	CLIC4, HEG1	COL18A1
GO:0051127	positive regulation of actin nucleation	8	1	0.03	90	0.03237	0.03237	1	1	Any process that activates or increases the frequency, rate or extent of actin nucleation, the initial step in the formation of an actin filament in which actin monomers combine to form a new filament	0.00273698	0.00273698	ABI2	WASL
GO:0060713	labyrinthine layer morphogenesis	8	1	0.03	91	0.03237	0.03237	1	1	The process in which the labyrinthine layer of the placenta is generated and organized	-0.100512	-0.100512	CYR61	FZD5
GO:1902991	regulation of amyloid precursor protein ...	8	1	0.03	1303	0.03237	1	1	1	Any process that modulates the frequency, rate or extent of amyloid precursor protein catabolic process	-0.0116068	-0.0116068	PICALM	ABCA7
GO:1901362	organic cyclic compound biosynthetic pro...	2757	17	11.31	93	0.03387	0.03387	1	1	The chemical reactions and pathways resulting in the formation of organic cyclic compound	1.14653	-1.28025	UFL1, LIN9, IL1RAP, SMAD5, PRKAA1, PKN2, ASCC3, ATAD2B, ACBD3, GDF6, DDX20, STRN3, UBE2D2, WWTR1, DCK, TGFBR1, DSCC1, GTF2H2, KLF5, NMD3, CLOCK, ZRANB2, HOXA3, XPO1, CDK5R1, ATF2, ASH1L, NUDT21, ZNF618, NEK7, UGDH, RPS6KA3, FUBP3, EID1, RMI1, GJA1, TDG, PHIP, MAP3K2, MED13, PHF6, SKIL, NUFIP1, ELAVL2, TNKS2, PRKAR1A, HMGN5, ATM, FOSL2, ARMCX3, CAND1, RNF6, LGR4, SLC26A2, RARB, LEMD3, BACH1, CTDSP…	HTRA1, SPP1, IGFBP7, FZD5, HOXB9, HMOX1, LTB4R2, MIER3, LZTS1, CDK11A, DYRK1B, ZNF41, ZNF17, ZNF512B, PIF1, CRTC1, CHCHD10, ZNF777, ZNF219, ZBTB7A, ZNF480, WASL, ZNF85, ZNF446, RIOX1, ZNF16, EFEMP1, MAP3K10, RNF2, MAP3K9, PLTP, ZBTB45, E2F8, ISL2, ZNF213, CBFA2T2, FLNA, ARID4B, MNT, MED26, ZNF414, MZF1, PTCH1, IBA57, NRF1, YAP1, ZNF142, ZNF329, ZNF200, AC138696.1, ZNF669, ZNF567, HOXB6, SMAD1, FO…
GO:0006413	translational initiation	177	3	0.73	895	0.03541	0.46431	1	1	The process preceding formation of the peptide bond between the first two amino acids of a protein. This includes the formation of a complex of the ribosome, mRNA, and an initiation complex that contains the first aminoacyl-tRNA	0.556102	-0.27216	UHMK1, DDX3X, RPL21, AGO2, EIF4G3, DENR, EIF2AK3, KHDRBS1, EIF2S1, RPS3A, RPS25, ABCE1
GO:0007098	centrosome cycle	73	2	0.3	96	0.03585	0.03585	1	1	The cell cycle process in which centrosome duplication and separation takes place. The centrosome cycle can operate with a considerable degree of independence from other processes of the cell cycle	0.643621	-0.286073	XPO1, SASS6, CHORDC1, CDK1, USP33, PKD2, CTNNB1, VPS4B, CCP110, GEN1, ROCK2, PDCD6IP, BRCA1, CHMP2B, CETN3, RANBP1	WDR62, BRSK1
GO:0006265	DNA topological change	9	1	0.04	97	0.03634	0.03634	1	1	The process in which a transformation is induced in the topological structure of a double-stranded DNA helix, resulting in a change in linking number	0.149012	0.149012	TOP2A, TOP1, TOP2B	TOP3B
GO:0034063	stress granule assembly	9	1	0.04	98	0.03634	0.03634	1	1	The aggregation, arrangement and bonding together of proteins and RNA molecules to form a stress granule	0.212083	0.212083	G3BP2, DDX3X
GO:0034086	maintenance of sister chromatid cohesion	9	1	0.04	99	0.03634	0.03634	1	1	The process in which the association between sister chromatids of a replicated chromosome is maintained as chromosomes condense, attach to the spindle in a bipolar orientation, and congress to the metaphase plate	0.221456	0.221456	DSCC1, RB1
GO:0034088	maintenance of mitotic sister chromatid ...	9	1	0.04	100	0.03634	0.03634	1	1	The process in which the association between sister chromatids of a replicated chromosome is maintained as chromosomes condense, attach to the spindle in a bipolar orientation, and congress to the metaphase plate during a mitotic cell cycle	0.221456	0.221456	DSCC1, RB1
GO:0035459	cargo loading into vesicle	9	1	0.04	101	0.03634	0.03634	1	1	The formation of a protein complex between the coat proteins and proteins that are going to be transported by a vesicle	0.130625	0.130625	TMED2, PICALM	SEC24B
GO:0046607	positive regulation of centrosome cycle	9	1	0.04	102	0.03634	0.03634	1	1	Any process that activates or increases the frequency, rate or extent of the centrosome cycle	0.197466	0.197466	VPS4B, ROCK2, RANBP1
GO:0046831	regulation of RNA export from nucleus	9	1	0.04	103	0.03634	0.03634	1	1	Any process that modulates the frequency, rate or extent of the directed movement of RNA from the nucleus to the cytoplasm	0.189819	0.189819	RIOK2, KHDRBS1
GO:0048261	negative regulation of receptor-mediated...	9	1	0.04	104	0.03634	0.03634	1	1	Any process that stops, prevents, or reduces the frequency, rate or extent of receptor mediated endocytosis, the uptake of external materials by cells, utilizing receptors to ensure specificity of transport	0.193221	0.193221	ARF6, PICALM
GO:0060413	atrial septum morphogenesis	9	1	0.04	105	0.03634	0.03634	1	1	The developmental process in which atrial septum is generated and organized. The atrial septum separates the upper chambers (the atria) of the heart from one another	0.0778672	0.0778672	SOX4, CYR61
GO:0061158	3'-UTR-mediated mRNA destabilization	9	1	0.04	106	0.03634	0.03634	1	1	An mRNA destabilization process in which one or more RNA-binding proteins associate with the 3'-untranslated region (UTR) of an mRNA	0.255357	0.255357	QKI, ZFP36L2
GO:2001044	regulation of integrin-mediated signalin...	9	1	0.04	1304	0.03634	1	1	1	Any process that modulates the frequency, rate or extent of integrin-mediated signaling pathway	-0.0344967	-0.0344967	CTNNA1	FLNA
GO:0052548	regulation of endopeptidase activity	180	3	0.74	446	0.03694	0.15943	1	1	Any process that modulates the frequency, rate or extent of endopeptidase activity, the endohydrolysis of peptide bonds within proteins	0.715689	-0.417303	CRIM1, RPS6KA3, KLF4, CARD8, DDX3X, BIRC6, TNFAIP8, REST, FNIP1, CDKN1B, PICALM, SIRT1, TFPI, SENP1, EIF2AK3, ARL6IP1, SH3RF1, ARL6IP5, SMAD3, CYR61, F2R, PRDX3	WFIKKN1, SRC, GAS6, POR
GO:0050792	regulation of viral process	182	3	0.75	449	0.03798	0.16224	1	1	Any process that modulates the rate or extent of the viral life cycle, the set of processes by which a virus reproduces and spreads among hosts	0.668582	-0.591156	PKN2, ELMOD2, DDX3X, CHD1, REST, TOP2A, AP1S2, VPS4B, AP1S3, YTHDC2, ANKRD17, GTF2F2, CHMP2B, POLR2K, TRIM32, STAT1, NUCKS1	HTRA1, SIN3A, ISG15
GO:0031333	negative regulation of protein complex a...	76	2	0.31	107	0.03858	0.03858	1	1	Any process that stops, prevents, or reduces the frequency, rate or extent of protein complex assembly	0.437095	-0.719185	DDX3X, MTPN, CAPZA1, ZNF451	CRYAB, SRC, CLIP3, TMOD1, FHOD3, CTNNBIP1
GO:0043280	positive regulation of cysteine-type end...	76	2	0.31	108	0.03858	0.03858	1	1	Any process that activates or increases the activity of a cysteine-type endopeptidase involved in the apoptotic process	0.556485	-0.230706	CARD8, DDX3X, REST, CDKN1B, SIRT1, SENP1, EIF2AK3, ARL6IP5, SMAD3, CYR61, F2R
GO:0001819	positive regulation of cytokine producti...	184	3	0.75	910	0.03904	0.47285	1	1	Any process that activates or increases the frequency, rate or extent of production of a cytokine	0.715625	-0.588176	IL1RAP, ATF2, CADM1, CARD8, POLR3G, DDX3X, HIF1A, ADAM17, C5AR1, HEG1, CTNNB1, CYP1B1, POLR3K, TBC1D23, MAP3K7, CHUK, ANKRD17, EIF2AK3, GLMN, SMAD3, TRAF6, CD58, BRCA1, GPRC5B, POLR2K, CD46, F2R, TRIM32, WNT5A	FZD5, HMOX1, CD274, IL17RC, SRC, IL6R, CD83, CD34
GO:0071103	DNA conformation change	184	3	0.75	109	0.03904	0.03904	1	1	A cellular process that results in a change in the spatial configuration of a DNA molecule. A conformation change can bend DNA, or alter the, twist, writhe, or linking number of a DNA molecule	0.832097	-0.469288	ASCC3, CENPQ, GTF2H2, KNL1, ASH1L, NAP1L3, CDK1, DDX3X, DNA2, KAT6A, CHD1, CUL4B, ASF1A, TOP2A, BRIP1, MTERF1, GINS4, CENPK, RECQL, H3F3A, ITGB3BP, MIS18BP1, TOP1, NBN, KAT6B, TOP2B	GRWD1, PIF1, TOP3B, RTEL1, XPC
GO:0000712	resolution of meiotic recombination inte...	10	1	0.04	112	0.0403	0.0403	1	1	The cleavage and rejoining of intermediates, such as Holliday junctions, formed during meiotic recombination to produce two intact molecules in which genetic material has been exchanged	0.0485294	0.0485294	TOP2A, TOP2B	SLX4
GO:0003283	atrial septum development	10	1	0.04	113	0.0403	0.0403	1	1	The progression of the atrial septum over time, from its initial formation to the mature structure	0.0894925	0.0894925	SOX4, CYR61
GO:0032239	regulation of nucleobase-containing comp...	10	1	0.04	114	0.0403	0.0403	1	1	Any process that modulates the frequency, rate or extent of the directed movement of nucleobases, nucleosides, nucleotides and nucleic acids, into, out of or within a cell, or between cells, by means of some agent such as a transporter or pore	0.147976	0.147976	RIOK2, KHDRBS1
GO:0034205	beta-amyloid formation	10	1	0.04	115	0.0403	0.0403	1	1	The generation of beta-amyloid by cleavage of the amyloid precursor protein (APP)	-0.0245141	-0.0245141	PICALM	ABCA7
GO:0060669	embryonic placenta morphogenesis	10	1	0.04	116	0.0403	0.0403	1	1	The process in which the embryonic placenta is generated and organized	-0.105343	-0.105343	CYR61	FZD5
GO:1903427	negative regulation of reactive oxygen s...	10	1	0.04	117	0.0403	0.0403	1	1	Any process that stops, prevents or reduces the frequency, rate or extent of reactive oxygen species biosynthetic process	-0.0627131	-0.0627131		CD34
GO:1905048	regulation of metallopeptidase activity	10	1	0.04	1305	0.0403	1	1	1		0.0715931	0.0715931	PICALM
GO:2001241	positive regulation of extrinsic apoptot...	10	1	0.04	118	0.0403	0.0403	1	1	Any process that activates or increases the frequency, rate or extent of extrinsic apoptotic signaling pathway in absence of ligand	-0.0470582	-0.0470582	CTNNA1
GO:0045727	positive regulation of translation	79	2	0.32	1306	0.04139	1	1	1	Any process that activates or increases the frequency, rate or extent of the chemical reactions and pathways resulting in the formation of proteins by the translation of mRNA	0.602561	-0.242338	SERP1, UHMK1, RBMS3, DDX3X, KHDRBS1, SOX4, LARP4, TRMT10C
GO:0032386	regulation of intracellular transport	323	4	1.33	119	0.04206	0.04206	1	1	Any process that modulates the frequency, rate or extent of the directed movement of substances within cells	0.895993	-0.999177	G3BP2, WWTR1, TGFBR1, XPO1, BNIP3L, UHMK1, CDK5R1, UBE2J1, ERLEC1, UGCG, KIF5B, RAB5A, CTDSPL2, CDK1, C2CD5, NUS1, PPP1CC, NUP58, RIOK2, PKD2, SIRT1, RINT1, PPP1R12A, SNAI2, FBXW11, KHDRBS1, BAG4, SOX4, FER, SMAD3, SMAD4, OSCP1, CDH3, PBLD, VAMP7, RBM22, ZPR1	CRYAB, FZD5, CNIH2, HMOX1, SEC24B, FLNA, PRELID3A, SRC, GAS6, PLK3, TONSL, STX1B, RBCK1
GO:0098609	cell-cell adhesion	325	4	1.33	120	0.04287	0.04287	1	1	The attachment of one cell to another cell via adhesion molecules	0.81933	-0.650033	DENND6A, ADAM9, CLDN12, CDK5R1, PRKAR1A, CDH2, ITGA4, CADM1, KLF4, DUSP10, FNDC3A, DSC2, RICTOR, PARVA, CD2AP, AJUBA, DSG2, STXBP3, CD24, SOCS5, CTNNB1, GCNT1, CYP1B1, ROCK1, ZC3H8, EFNB2, CTNND1, SNAI2, YES1, MAP3K7, PTK2, CLDN11, CDH12, ITGAV, CD47, PRKG1, FER, GLMN, RAB10, CYR61, TRAF6, NRXN3, CD58, ITGA6, CD55, CDH3, CTNNA1, CD46, PDLIM5, CNN3, WNT5A	NECTIN1, CORO1A, SLC7A11, IGFBP2, EFNB1, TYRO3, PLXNB3, FLNA, ITGB3, CD274, SRC, ZEB1, GAS6, ATP2C1, LAG3, HLX, CD83, CD34, ICAM3, ZBTB7B, SCARF2, GLI2
GO:2001056	positive regulation of cysteine-type end...	81	2	0.33	121	0.04331	0.04331	1	1	Any process that activates or increases the frequency, rate or extent of cysteine-type endopeptidase activity	0.556485	-0.251195	CARD8, DDX3X, REST, CDKN1B, SIRT1, SENP1, EIF2AK3, ARL6IP5, SMAD3, CYR61, F2R
GO:0043903	regulation of symbiosis, encompassing mu...	192	3	0.79	475	0.04342	0.17644	1	1	Any process that modulates the frequency, rate or extent of symbiosis, an interaction between two organisms living together in more or less intimate association	0.668582	-0.597236	PKN2, ELMOD2, DDX3X, CHD1, REST, TOP2A, AP1S2, VPS4B, AP1S3, YTHDC2, ANKRD17, ITGAV, GTF2F2, CHMP2B, POLR2K, TRIM32, STAT1, NUCKS1	HTRA1, SIN3A, ISG15
GO:0051346	negative regulation of hydrolase activit...	192	3	0.79	476	0.04342	0.17644	1	1	Any process that stops or reduces the rate of hydrolase activity, the catalysis of the hydrolysis of various bonds	0.795431	-0.55457	CRIM1, TIPRL, KNL1, RPS6KA3, TMED2, SH3RF2, KLF4, DDX3X, BIRC6, TNFAIP8, FNIP1, PICALM, SIRT1, TFPI, ROCK1, BAG4, ARL6IP1, URI1, ROCK2, SH3RF1, SYTL2, CNN3, NIFK, PRDX3, ABCE1	NEIL1, WDR81, PLXNB3, WFIKKN1, LMTK3, SRC, DLG3, GAS6, POR
GO:0003181	atrioventricular valve morphogenesis	11	1	0.05	122	0.04424	0.04424	1	1	The process in which the structure of the atrioventricular valve is generated and organized	0.165461	0.0859829	SOX4, CYR61, SMAD4
GO:0007100	mitotic centrosome separation	11	1	0.05	123	0.04424	0.04424	1	1	Separation of duplicated centrosome components at the beginning of mitosis. The centriole pair within each centrosome becomes part of a separate microtubule organizing center that nucleates a radial array of microtubules called an aster. The two asters move to opposite sides of the nucleus to form the two poles of the mitotic spindle	0.125853	0.0736796	RANBP1
GO:0010586	miRNA metabolic process	11	1	0.05	124	0.04424	0.04424	1	1	The chemical reactions and pathways involving miRNA, microRNA, a class of single-stranded RNA molecules of about 21-23 nucleotides in length, which regulates gene expression	0.137596	0.0523847	AGO2
GO:0010592	positive regulation of lamellipodium ass...	11	1	0.05	125	0.04424	0.04424	1	1	Any process that increases the rate, frequency or extent of the formation of a lamellipodium, a thin sheetlike extension of the surface of a migrating cell	0.122384	0.0571552
GO:0048268	clathrin coat assembly	11	1	0.05	126	0.04424	0.04424	1	1	The process that results in the assembly of clathrin triskelia into the ordered structure known as a clathrin cage	0.0710988	-0.0161557	PICALM, PIK3C2A
GO:0060561	apoptotic process involved in morphogene...	11	1	0.05	1307	0.04424	1	1	1	Any apoptotic process that contributes to the shaping of an anatomical structure	0.0118489	-0.143082	CYR61	FZD5
GO:0090136	epithelial cell-cell adhesion	11	1	0.05	127	0.04424	0.04424	1	1	The attachment of an epithelial cell to another epithelial cell via adhesion molecules	0.1475	0.0665256	CYP1B1, CTNNA1
GO:0010557	positive regulation of macromolecule bio...	995	8	4.08	460	0.04491	0.1721	1	1	Any process that increases the rate, frequency or extent of the chemical reactions and pathways resulting in the formation of a macromolecule, any molecule of high relative molecular mass, the structure of which essentially comprises the multiple repetition of units derived, actually or conceptually, from molecules of low relative molecular mass	1.01657	-0.935675	SMAD5, SERP1, ATAD2B, GDF6, WWTR1, TGFBR1, DSCC1, KLF5, NMD3, CLOCK, UHMK1, ATF2, ASH1L, NEK7, RPS6KA3, FUBP3, PHIP, MAP3K2, RBMS3, MED13, NUFIP1, TNKS2, HMGN5, ATM, FOSL2, ARMCX3, CAND1, RNF6, LGR4, RARB, BACH1, MYBL1, FLI1, EDN1, KLF4, PRDM2, CDK1, NR1D2, ATXN7, ZFHX3, DDX3X, DNA2, KAT6A, CHD1, RBPJ, FOXN3, PDGFC, DLX1, CDK8, NFIB, CCNC, TRIM24, HIF1A, REST, NPAT, CHD6, PICALM, PKD2, TBL1XR1, M…	SPP1, FZD5, HOXB9, HMOX1, DYRK1B, CRTC1, E2F8, ARID4B, MZF1, PTCH1, NRF1, YAP1, ZNF567, SMAD1, SRC, MED25, ID2, ZEB1, ZKSCAN3, BRF1, CARM1, JUNB, TFEB, AXIN1, KMT2B, IKBKG, CEBPD, MYO6, PNKP, MEIS3, PIAS2, DBP, SIN3A, FLT3LG, AGRN, MED16, SOX12, SCX, ZBTB7B, SUPT3H, ZFP90, GLI2, GLIS2, EPC1, TCEA2
GO:0090304	nucleic acid metabolic process	3297	19	13.53	773	0.04491	0.3673	1	1	Any cellular metabolic process involving nucleic acids	1.14458	-1.245	UFL1, LIN9, IL1RAP, SMAD5, PRKAA1, PKN2, ASCC3, ATAD2B, GDF6, DDX20, PRPF39, STRN3, UBE2D2, WWTR1, MBNL2, QKI, TGFBR1, DSCC1, GTF2H2, KLHL15, TRMT13, KLF5, NMD3, CLOCK, ZRANB2, HOXA3, XPO1, CDK5R1, ATF2, PRPF38B, TRNT1, ASH1L, NUDT21, ZNF618, NEK7, RPS6KA3, FUBP3, EID1, RMI1, GJA1, TDG, ERI2, PHIP, MAP3K2, MED13, PHF6, SKIL, NUFIP1, ELAVL2, TNKS2, PRKAR1A, HMGN5, ATM, FOSL2, ARMCX3, CAND1, RNF6, …	HTRA1, SPP1, FZD5, HOXB9, HMOX1, GRWD1, MIER3, LZTS1, CDK11A, NEIL1, DYRK1B, ZNF41, ZNF17, ZNF512B, PIF1, CRTC1, LCMT2, ZNF777, WDR4, ZNF219, ZBTB7A, ZNF480, WASL, SLX4, ZNF85, ZNF446, RIOX1, ZNF16, EFEMP1, MAP3K10, RNF2, RRP7BP, MAP3K9, MTREX, ZBTB45, E2F8, ISL2, ZNF213, CBFA2T2, FLNA, ARID4B, MNT, MED26, ZNF414, MZF1, PTCH1, HEMK1, NRF1, YAP1, ZNF142, ZNF329, ZNF200, EMG1, AC138696.1, ZNF669, M…
GO:0009611	response to wounding	331	4	1.36	129	0.04535	0.04535	1	1	Any process that results in a change in state or activity of a cell or an organism (in terms of movement, secretion, enzyme production, gene expression, etc.) as a result of a stimulus indicating damage to the organism	0.817366	-0.860175	PRKAR2B, PHLDB2, TGFBR1, GJA1, PRKAR1A, RAB5A, EDN1, KLF4, CDK1, LOX, PDGFC, HIF1A, COL3A1, AJUBA, ADAM17, STXBP3, EPHA4, MTPN, TFPI, FGF2, MSX2, SLC1A3, CAPZA1, H3F3A, DGKH, HPS5, ZFP36L2, PRKCE, PRKG1, SMAD3, CYR61, CDH3, CTNNA1, BPTF, AKAP1, F2R, WNT5A, TENT5A	SPP1, HMOX1, ITGB4, EHD3, SLC7A11, TYRO3, FLNA, ITGB3, COL1A2, SRC, GAS6, ADAM15, DGKZ, CD34
GO:0044271	cellular nitrogen compound biosynthetic ...	3073	18	12.61	265	0.04563	0.09644	1	1	The chemical reactions and pathways resulting in the formation of organic and inorganic nitrogenous compounds	1.15525	-1.24117	UFL1, LIN9, IL1RAP, SMAD5, SERP1, PRKAA1, PKN2, ASCC3, ATAD2B, GDF6, SGMS1, DDX20, STRN3, UBE2D2, WWTR1, DCK, SECISBP2L, QKI, TGFBR1, DSCC1, GTF2H2, KLF5, NMD3, CLOCK, ZRANB2, HOXA3, XPO1, UHMK1, CDK5R1, GIGYF2, ATF2, ASH1L, NUDT21, ZNF618, NEK7, UGDH, RPS6KA3, FUBP3, EID1, RMI1, GJA1, TDG, PHIP, MRPS18C, MAP3K2, RBMS3, MED13, PHF6, SKIL, NUFIP1, ELAVL2, TNKS2, PRKAR1A, HMGN5, ATM, FOSL2, UGCG, A…	HTRA1, SPP1, FZD5, HOXB9, HMOX1, LTB4R2, MIER3, LZTS1, CDK11A, DYRK1B, ZNF41, ZNF17, ZNF512B, PIF1, CRTC1, CHCHD10, ZNF777, ZNF219, ZBTB7A, ZNF480, WASL, ZNF85, ZNF446, RIOX1, ZNF16, EFEMP1, MAP3K10, RNF2, MAP3K9, ZBTB45, E2F8, ISL2, ZNF213, CBFA2T2, FLNA, ARID4B, MNT, MED26, ZNF414, MZF1, PTCH1, IBA57, NRF1, YAP1, ZNF142, ZNF329, ZNF200, AC138696.1, ZNF669, ZNF567, HOXB6, SMAD1, FOXO6, SRC, MED2…
GO:0033043	regulation of organelle organization	819	7	3.36	1028	0.0458	0.58829	1	1	Any process that modulates the frequency, rate or extent of a process involved in the formation, arrangement of constituent parts, or disassembly of an organelle	0.947168	-0.734077	SLAIN2, ATAD2B, PHLDB2, TGFBR1, CLIC4, ARPC1B, XPO1, STAM, BNIP3L, CDK5R1, NEK7, EID1, ARHGAP18, PHIP, ARF6, TNKS2, PRKAR1A, CDH2, ATM, UGCG, KIF5B, GMFB, TMEM33, RAB5A, CHORDC1, EDN1, TBC1D9, SSH2, C2CD5, RICTOR, MGARP, MIER1, CD2AP, HIF1A, ARPC5, CDKN1B, KIF18A, MTPN, ASF1A, SIRT1, MYPN, CTNNB1, YWHAG, RB1, VPS4B, CCP110, ROCK1, ANLN, CDC27, RAD21, OPA1, RAB3GAP2, MSX2, CAPZA1, SNAI2, RTF1, H3F…	FZD5, STMN3, CORO1A, EHD3, OMA1, PIF1, WASL, SLX4, TBC1D3L, SEC24B, ADAMTS16, RABGAP1L, PRELID3A, LRSAM1, SRC, CLIP3, INF2, TMOD1, RTEL1, KMT2B, ARHGDIA, GNL3L, PNKP, ALMS1, FHOD3, SIN3A, ARAP1
GO:0052547	regulation of peptidase activity	197	3	0.81	491	0.04627	0.18362	1	1	Any process that modulates the frequency, rate or extent of peptidase activity, the hydrolysis of peptide bonds within proteins	0.715689	-0.417303	CRIM1, RPS6KA3, KLF4, CARD8, DDX3X, BIRC6, TNFAIP8, REST, FNIP1, CDKN1B, PICALM, SIRT1, TFPI, SENP1, EIF2AK3, ARL6IP1, SH3RF1, ARL6IP5, SMAD3, CYR61, F2R, PRDX3	WFIKKN1, SRC, GAS6, POR
GO:0016043	cellular component organization	3788	21	15.54	1016	0.0479	0.57998	1	1	A process that results in the assembly, arrangement of constituent parts, or disassembly of a cellular component	1.1793	-1.64353	MIGA1, GDAP1, PRKAR2B, IL1RAP, SLAIN2, SERP1, G3BP2, PRKAA1, PKN2, ASCC3, CRIM1, DENND6A, AGFG1, SH3D19, ATAD2B, TIMM17A, PTPRG, DDX20, PRPF39, CENPQ, CHML, WWTR1, PHLDB2, ADAM9, COBLL1, TGFBR1, DSCC1, GTF2H2, FAM126A, CLIC4, KLF5, PARP11, CLOCK, MAP3K1, ARPC1B, XPO1, MZT1, SRGAP2C, PEX11A, STAM, BNIP3L, UHMK1, CDK5R1, DNAAF4, ATF2, CEP126, TRAPPC13, TRNT1, KNL1, ASH1L, NUDT21, NAP1L3, NEK7, RPS6…	CRYAB, HTRA1, SPP1, PANX2, IGFBP7, OSGIN1, FZD5, CNIH2, HMOX1, AURKC, GRWD1, ITGB4, SEMA6C, LZTS1, CDK11A, STMN3, ADAMTSL4, NECTIN1, CORO1A, RAB4B-EGLN2, EHD3, OMA1, PIF1, IGFBP2, BOC, CRTC1, CHCHD10, PILRB, COL6A2, KIF13B, WASL, SLX4, PPIL2, RIOX1, PLEKHF1, EFNB1, ABCA7, C1QL1, RNF2, RRP7BP, PLTP, TYRO3, PLXNB3, MGST1, TBC1D3L, ISL2, MYO7B, CBFA2T2, SEC24B, FLNA, ARID4B, ADAMTS16, RABGAP1L, PTCH…
GO:0000054	ribosomal subunit export from nucleus	12	1	0.05	131	0.04816	0.04816	1	1	The directed movement of a ribosomal subunit from the nucleus into the cytoplasm	0.364664	0.150145	NMD3, XPO1, RIOK2, ABCE1
GO:0003171	atrioventricular valve development	12	1	0.05	132	0.04816	0.04816	1	1	The progression of the atrioventricular valve over time, from its formation to the mature structure	0.190508	0.0362166	SOX4, CYR61, SMAD4
GO:0010613	positive regulation of cardiac muscle hy...	12	1	0.05	133	0.04816	0.04816	1	1	Any process that increases the rate, frequency or extent of the enlargement or overgrowth of all or part of the heart due to an increase in size (not length) of individual cardiac muscle fibers, without cell division	0.201298	0.0356354	EDN1, MTPN
GO:0014742	positive regulation of muscle hypertroph...	12	1	0.05	134	0.04816	0.04816	1	1	Any process that activates or increases the frequency, rate or extent of muscle hypertrophy	0.201298	0.0356354	EDN1, MTPN
GO:0021696	cerebellar cortex morphogenesis	12	1	0.05	1308	0.04816	1	1	1	The process in which the anatomical structure of the cranial nerves are generated and organized. The cerebellar cortex is a thin mantle of gray matter that covers the surface of each cerebral hemisphere. It has a characteristic morphology with convolutions (gyri) and crevices (sulci) that have specific functions. Six layers of nerve cells and the nerve pathways that connect them comprise the cere…	0.0649532	-0.107242	MTPN	GLI2
GO:0033750	ribosome localization	12	1	0.05	135	0.04816	0.04816	1	1	A process in which a ribosome is transported to, and/or maintained in, a specific location	0.364664	0.150145	NMD3, XPO1, RIOK2, ABCE1
GO:0033753	establishment of ribosome localization	12	1	0.05	136	0.04816	0.04816	1	1	The directed movement of the ribosome to a specific location	0.364664	0.150145	NMD3, XPO1, RIOK2, ABCE1
GO:0051299	centrosome separation	12	1	0.05	137	0.04816	0.04816	1	1	The process in which duplicated centrosome components move away from each other. The centriole pair within each centrosome becomes part of a separate microtubule organizing center that nucleates a radial array of microtubules called an aster. The two asters move to opposite sides of the nucleus to form the two poles of the mitotic spindle	0.125853	0.032507	RANBP1
GO:0051307	meiotic chromosome separation	12	1	0.05	138	0.04816	0.04816	1	1	The process in which chromosomes are physically detached from each other during meiosis	0.132861	-0.054198	TOP2A, TOP2B	SLX4
GO:0060716	labyrinthine layer blood vessel developm...	12	1	0.05	139	0.04816	0.04816	1	1	The process whose specific outcome is the progression of a blood vessel of the labyrinthine layer of the placenta over time, from its formation to the mature structure. The embryonic vessels grow through the layer to come in close contact with the maternal blood supply	0.148493	-0.155276	TMED2, RBPJ, CYR61	FZD5, JUNB
GO:0061298	retina vasculature development in camera...	12	1	0.05	140	0.04816	0.04816	1	1	The process whose specific outcome is the progression of the vasculature of the retina over time, from its formation to the mature structure	0.228143	0.0109819	CLIC4, HIF1A, CYP1B1
GO:0090153	regulation of sphingolipid biosynthetic ...	12	1	0.05	141	0.04816	0.04816	1	1	Any process that modulates the rate, frequency or extent of sphingolipid biosynthesis. Sphingolipid biosynthesis is the chemical reactions and pathways resulting in the formation of sphingolipids, any of a class of lipids containing the long-chain amine diol sphingosine or a closely related base (a sphingoid)	0.243256	0.0467464	PRKAA1, CYR61, SAMD8
GO:1905038	regulation of membrane lipid metabolic p...	12	1	0.05	142	0.04816	0.04816	1	1		0.243256	0.0467464	PRKAA1, CYR61, SAMD8
GO:2000303	regulation of ceramide biosynthetic proc...	12	1	0.05	143	0.04816	0.04816	1	1	Any process that modulates the frequency, rate or extent of a ceramide biosynthetic process	0.243256	0.0467464	PRKAA1, CYR61, SAMD8

## Sheet: top 80 upreg
GO id	Term	Genes in genome (background)	Genes in top-80 upreg	Expected genes in top-80 upreg	Rank in P.Fisher.elim	P.Fisher	P.Fisher.elim	FDR.Fisher	FDR.Fisher.elim	Description	Avg.LogFC for top-10 upreg	Avg.LogFC for top-10 downreg	Upreg genes (LogFC > 0.4)	Downreg genes (LogFC < -0.4)
GO:0007062	sister chromatid cohesion	110	8	0.92	2	3.2e-06	0.00077	0.032	1	The cell cycle process in which the sister chromatids of a replicated chromosome are associated with each other	0.727734	-0.232764	CENPQ, DSCC1, XPO1, KNL1, PPP1CC, NAA50, KIF18A, CTNNB1, RB1, CENPK, RAD21, ITGB3BP, STAG2, NUP160, SFPQ, NDC80, SKA1, SPDL1	INCENP
GO:0000819	sister chromatid segregation	186	9	1.55	1368	2.1e-05	0.43716	0.105	1	The cell cycle process in which sister chromatids are organized and then physically separated and apportioned to two or more sets	0.766748	-0.349564	CENPQ, DSCC1, XPO1, KNL1, ATM, CHAMP1, PPP1CC, NAA50, KIF18A, TOP2A, CTNNB1, RB1, VPS4B, CENPK, CDC27, RAD21, ITGB3BP, STAG2, GEN1, RACGAP1, CHMP2B, NUP160, SFPQ, NDC80, TOP2B, SKA1, SPDL1, BECN1	AURKC, INCENP
GO:0007059	chromosome segregation	260	10	2.16	1117	5.3e-05	0.31073	0.176667	1	The process in which genetic material, in the form of chromosomes, is organized into specific structures and then physically separated and apportioned to two or more sets. In eukaryotes, chromosome segregation begins with the condensation of chromosomes, includes chromosome separation, and ends when chromosomes have completed movement to the spindle poles	0.790678	-0.451632	CENPQ, DSCC1, XPO1, KNL1, ATM, LEMD3, CHAMP1, DDX3X, PPP1CC, NAA50, ESCO2, KIF18A, TOP2A, CTNNB1, BRIP1, RB1, VPS4B, CENPK, CDC27, RAD21, CCNE2, ITGB3BP, STAG2, TOP1, GEN1, RACGAP1, BRCA1, CHMP2B, NUP160, SFPQ, NDC80, TOP2B, SKA1, SPDL1, BECN1	AURKC, SLX4, TOP3B, ABRAXAS2, INCENP
GO:0098813	nuclear chromosome segregation	219	9	1.82	1561	7.7e-05	0.56217	0.1925	1		0.782278	-0.424137	CENPQ, DSCC1, XPO1, KNL1, ATM, LEMD3, CHAMP1, PPP1CC, NAA50, KIF18A, TOP2A, CTNNB1, BRIP1, RB1, VPS4B, CENPK, CDC27, RAD21, CCNE2, ITGB3BP, STAG2, GEN1, RACGAP1, CHMP2B, NUP160, SFPQ, NDC80, TOP2B, SKA1, SPDL1, BECN1	AURKC, SLX4, ABRAXAS2, INCENP
GO:0071840	cellular component organization or bioge...	3975	48	33.07	508	0.00033	0.11747	0.51	1	A process that results in the biosynthesis of constituent macromolecules, assembly, arrangement of constituent parts, or disassembly of a cellular component	1.1793	-1.64353	MIGA1, GDAP1, PRKAR2B, IL1RAP, SLAIN2, SERP1, G3BP2, PRKAA1, PKN2, ASCC3, CRIM1, DENND6A, AGFG1, SH3D19, ATAD2B, TIMM17A, PTPRG, DDX20, PRPF39, CENPQ, CHML, WWTR1, PHLDB2, ADAM9, COBLL1, TGFBR1, DSCC1, GTF2H2, FAM126A, CLIC4, KLF5, PARP11, NMD3, CLOCK, MAP3K1, ARPC1B, XPO1, MZT1, SRGAP2C, PEX11A, STAM, BNIP3L, UHMK1, CDK5R1, DNAAF4, ATF2, CEP126, TRAPPC13, TRNT1, KNL1, ASH1L, NUDT21, NAP1L3, NEK7…	CRYAB, HTRA1, SPP1, PANX2, IGFBP7, OSGIN1, FZD5, CNIH2, HMOX1, AURKC, GRWD1, ITGB4, SEMA6C, LZTS1, CDK11A, STMN3, ADAMTSL4, NECTIN1, CORO1A, RAB4B-EGLN2, EHD3, OMA1, PIF1, IGFBP2, BOC, CRTC1, CHCHD10, PILRB, COL6A2, KIF13B, WASL, SLX4, PPIL2, RIOX1, PLEKHF1, EFNB1, ABCA7, C1QL1, RNF2, RRP7BP, PLTP, TYRO3, PLXNB3, MTREX, MGST1, TBC1D3L, ISL2, MYO7B, CBFA2T2, SEC24B, FLNA, ARID4B, ADAMTS16, RABGAP1…
GO:0071680	response to indole-3-methanol	4	2	0.03	2072	0.00041	1	0.51	1	Any process that results in a change in state or activity of a cell or an organism (in terms of movement, secretion, enzyme production, gene expression, etc.) as a result of an indole-3-methanol stimulus	0.295143	0.295143	CTNNB1, BRCA1, CTNNA1
GO:0071681	cellular response to indole-3-methanol	4	2	0.03	1	0.00041	0.00041	0.51	1	Any process that results in a change in state or activity of a cell (in terms of movement, secretion, enzyme production, gene expression, etc.) as a result of an indole-3-methanol stimulus	0.295143	0.295143	CTNNB1, BRCA1, CTNNA1
GO:0051726	regulation of cell cycle	760	16	6.32	8	0.00041	0.0022	0.51	1	Any process that modulates the rate or extent of progression through the cell cycle	0.997303	-0.640466	LIN9, PRKAA1, PKN2, CUL5, TIPRL, TGFBR1, CLOCK, XPO1, UHMK1, CDK5R1, GIGYF2, ATF2, KNL1, NEK7, CCNG1, PHIP, SKIL, PRKAR1A, HMGN5, ATM, CCNI, CHORDC1, EDN1, CDK1, ZFHX3, DDX3X, DNA2, BIRC6, SKP2, CDK15, FIGNL1, TOPBP1, FOXN3, CDK8, CUL4B, CCNC, PCLAF, ADAM17, CDKN1B, CNOT8, PKD2, SIRT1, TOP2A, RINT1, CTNNB1, BRIP1, RB1, VPS4B, CCP110, TAF1, CCNYL1, ANLN, CDC27, RAD21, CCNE2, MSX2, BORA, ANKRD17, K…	AURKC, CDK11A, ZNF16, E2F8, MNT, LIN37, PTCH1, TMEM8B, TRIM36, MRNIP, GAS2L1, SRC, MED25, ID2, GAS6, CARM1, JUNB, GBF1, PLK3, SIN3A, FLT3LG, CLSPN, BRSK1, XPC
GO:0043281	regulation of cysteine-type endopeptidas...	122	6	1.01	2073	0.00051	1	0.51	1	Any process that modulates the activity of a cysteine-type endopeptidase involved in apoptosis	0.647128	-0.341757	RPS6KA3, KLF4, CARD8, DDX3X, TNFAIP8, REST, FNIP1, CDKN1B, SIRT1, SENP1, EIF2AK3, ARL6IP1, SH3RF1, ARL6IP5, SMAD3, CYR61, F2R, PRDX3	SRC, GAS6, POR
GO:0007049	cell cycle	1283	22	10.67	1862	0.00051	0.82015	0.51	1	The progression of biochemical and morphological phases and events that occur in a cell during successive cell replication or nuclear replication events. Canonically, the cell cycle comprises the replication and segregation of genetic material followed by the division of the cell, but in endocycles or syncytial cells nuclear replication or nuclear division may not be followed by cell division	1.07734	-0.700393	LIN9, PRKAR2B, PRKAA1, PKN2, PPP1CB, CUL5, CENPQ, TIPRL, TGFBR1, DSCC1, CLOCK, XPO1, MZT1, UHMK1, CDK5R1, GIGYF2, ATF2, CEP126, KNL1, NEK7, RPS6KA3, EID1, CCNG1, PHIP, ARF6, SKIL, SASS6, PRKAR1A, HMGN5, ATM, LEMD3, CHAMP1, BACH1, CCNI, MYBL1, CHORDC1, EDN1, CDK1, PTP4A1, ZFHX3, DDX3X, DNA2, BIRC6, USP33, SKP2, CDK15, FIGNL1, PPP1CC, NAA50, TOPBP1, FOXN3, CDK8, CUL4B, CCNC, CD2AP, AJUBA, NPAT, LRR…	AURKC, LZTS1, CDK11A, WASL, SLX4, ZNF16, RNF2, E2F8, FLNA, MNT, LIN37, PTCH1, TMEM8B, TRIM36, MRNIP, GAS2L1, SRC, MED25, FSD1, ID2, SEPT1, GAS6, FBXL15, RTEL1, CARM1, ABRAXAS2, ZFYVE26, JUNB, GBF1, WDR62, PLK3, ALMS1, SIN3A, FLT3LG, INCENP, DMTF1, CLSPN, NEDD1, ARAP1, KCTD11, PARD6A, BRSK1, XPC
GO:0052548	regulation of endopeptidase activity	180	7	1.5	2074	0.00071	1	0.591667	1	Any process that modulates the frequency, rate or extent of endopeptidase activity, the endohydrolysis of peptide bonds within proteins	0.715689	-0.417303	CRIM1, RPS6KA3, KLF4, CARD8, DDX3X, BIRC6, TNFAIP8, REST, FNIP1, CDKN1B, PICALM, SIRT1, TFPI, SENP1, EIF2AK3, ARL6IP1, SH3RF1, ARL6IP5, SMAD3, CYR61, F2R, PRDX3	WFIKKN1, SRC, GAS6, POR
GO:2000116	regulation of cysteine-type endopeptidas...	130	6	1.08	2075	0.00071	1	0.591667	1	Any process that modulates the frequency, rate or extent of cysteine-type endopeptidase activity	0.647128	-0.35725	RPS6KA3, KLF4, CARD8, DDX3X, TNFAIP8, REST, FNIP1, CDKN1B, SIRT1, SENP1, EIF2AK3, ARL6IP1, SH3RF1, ARL6IP5, SMAD3, CYR61, F2R, PRDX3	SRC, GAS6, POR
GO:0034250	positive regulation of cellular amide me...	91	5	0.76	98	0.00093	0.0212	0.591667	1	Any process that activates or increases the frequency, rate or extent of the chemical reactions and pathways involving amides	0.637753	-0.268695	SERP1, UHMK1, RBMS3, DDX3X, PICALM, KHDRBS1, SOX4, CYR61, LARP4, TRMT10C	PLK3
GO:0007021	tubulin complex assembly	6	2	0.05	3	0.001	0.001	0.591667	1	The aggregation and bonding together of alpha- and beta-tubulin to form a tubulin heterodimer	0.165083	0.165083	TBCA, VBP1
GO:1900262	regulation of DNA-directed DNA polymeras...	6	2	0.05	2076	0.001	1	0.591667	1	Any process that modulates the frequency, rate or extent of DNA-directed DNA polymerase activity	0.22418	0.22418	DSCC1, RFC3
GO:1900264	positive regulation of DNA-directed DNA ...	6	2	0.05	4	0.001	0.001	0.591667	1	Any process that activates or increases the frequency, rate or extent of DNA-directed DNA polymerase activity	0.22418	0.22418	DSCC1, RFC3
GO:0016043	cellular component organization	3788	45	31.51	932	0.00108	0.24624	0.591667	1	A process that results in the assembly, arrangement of constituent parts, or disassembly of a cellular component	1.1793	-1.64353	MIGA1, GDAP1, PRKAR2B, IL1RAP, SLAIN2, SERP1, G3BP2, PRKAA1, PKN2, ASCC3, CRIM1, DENND6A, AGFG1, SH3D19, ATAD2B, TIMM17A, PTPRG, DDX20, PRPF39, CENPQ, CHML, WWTR1, PHLDB2, ADAM9, COBLL1, TGFBR1, DSCC1, GTF2H2, FAM126A, CLIC4, KLF5, PARP11, CLOCK, MAP3K1, ARPC1B, XPO1, MZT1, SRGAP2C, PEX11A, STAM, BNIP3L, UHMK1, CDK5R1, DNAAF4, ATF2, CEP126, TRAPPC13, TRNT1, KNL1, ASH1L, NUDT21, NAP1L3, NEK7, RPS6…	CRYAB, HTRA1, SPP1, PANX2, IGFBP7, OSGIN1, FZD5, CNIH2, HMOX1, AURKC, GRWD1, ITGB4, SEMA6C, LZTS1, CDK11A, STMN3, ADAMTSL4, NECTIN1, CORO1A, RAB4B-EGLN2, EHD3, OMA1, PIF1, IGFBP2, BOC, CRTC1, CHCHD10, PILRB, COL6A2, KIF13B, WASL, SLX4, PPIL2, RIOX1, PLEKHF1, EFNB1, ABCA7, C1QL1, RNF2, RRP7BP, PLTP, TYRO3, PLXNB3, MGST1, TBC1D3L, ISL2, MYO7B, CBFA2T2, SEC24B, FLNA, ARID4B, ADAMTS16, RABGAP1L, PTCH…
GO:0032481	positive regulation of type I interferon...	56	4	0.47	5	0.00117	0.00117	0.591667	1	Any process that activates or increases the frequency, rate, or extent of type I interferon production. Type I interferons include the interferon-alpha, beta, delta, episilon, zeta, kappa, tau, and omega gene families	0.486873	-0.241922	POLR3G, DDX3X, CTNNB1, POLR3K, CHUK, POLR2K
GO:0022402	cell cycle process	1006	18	8.37	563	0.00118	0.1298	0.591667	1	The cellular process that ensures successive accurate and complete genome replication and chromosome segregation	1.03313	-0.688508	PRKAR2B, PRKAA1, PKN2, PPP1CB, CUL5, CENPQ, TGFBR1, DSCC1, XPO1, MZT1, UHMK1, CDK5R1, GIGYF2, ATF2, CEP126, KNL1, NEK7, CCNG1, PHIP, SKIL, SASS6, PRKAR1A, HMGN5, ATM, LEMD3, CHAMP1, BACH1, CHORDC1, EDN1, CDK1, ZFHX3, DDX3X, DNA2, BIRC6, USP33, SKP2, PPP1CC, NAA50, TOPBP1, FOXN3, CUL4B, CD2AP, AJUBA, NPAT, LRRCC1, ADAM17, NUP58, CDKN1B, CNOT8, KIF18A, PKD2, TOP2A, RINT1, CTNNB1, BRIP1, YWHAG, RB1,…	AURKC, LZTS1, CDK11A, WASL, SLX4, ZNF16, E2F8, FLNA, MRNIP, GAS2L1, MED25, FSD1, ID2, GAS6, FBXL15, RTEL1, CARM1, ABRAXAS2, ZFYVE26, WDR62, PLK3, ALMS1, SIN3A, INCENP, CLSPN, NEDD1, ARAP1, BRSK1, XPC
GO:0052547	regulation of peptidase activity	197	7	1.64	2077	0.0012	1	0.591667	1	Any process that modulates the frequency, rate or extent of peptidase activity, the hydrolysis of peptide bonds within proteins	0.715689	-0.417303	CRIM1, RPS6KA3, KLF4, CARD8, DDX3X, BIRC6, TNFAIP8, REST, FNIP1, CDKN1B, PICALM, SIRT1, TFPI, SENP1, EIF2AK3, ARL6IP1, SH3RF1, ARL6IP5, SMAD3, CYR61, F2R, PRDX3	WFIKKN1, SRC, GAS6, POR
GO:0003279	cardiac septum development	57	4	0.47	2078	0.00125	1	0.591667	1	The progression of a cardiac septum over time, from its initial formation to the mature structure	0.561567	-0.32488	TGFBR1, RARB, PARVA, HEG1, MSX2, SOX4, CYR61, SMAD4, TBX3, WNT5A	ID2
GO:0070601	centromeric sister chromatid cohesion	7	2	0.06	215	0.0014	0.04825	0.591667	1	The cell cycle process in which the sister chromatids of a replicated chromosome are joined along the length of the centromeric region of the chromosome	0.193231	0.193231	NAA50, CTNNB1
GO:1902589	single-organism organelle organization	1108	19	9.22	1539	0.0014	0.5471	0.591667	1	An organelle organization which involves only one organism	1.10225	-0.747017	MIGA1, GDAP1, PRKAR2B, SLAIN2, AGFG1, CENPQ, WWTR1, PHLDB2, COBLL1, TGFBR1, DSCC1, MAP3K1, ARPC1B, XPO1, MZT1, SRGAP2C, BNIP3L, CDK5R1, DNAAF4, ATF2, CEP126, KNL1, POC1B, ARHGAP18, ARF6, MAP3K2, PRKAR1A, RAB8B, ATM, KIF5B, GMFB, CHAMP1, HOOK3, EDN1, ICK, TBC1D9, CDK1, SSH2, DNA2, PTPDC1, C2CD5, DNAAF2, MYO1B, FIGNL1, PPP1CC, NAA50, CORO2A, RICTOR, PARVA, CD2AP, HIF1A, MARCKS, ARPC5, STX6, GAS2L3,…	FZD5, AURKC, STMN3, CORO1A, EHD3, OMA1, WASL, TBC1D3L, FLNA, ADAMTS16, RABGAP1L, LAMA5, MKLN1, SRC, TMEM175, CLIP3, INF2, ATG2A, KLC1, TMOD1, RTEL1, ATP2C1, AXIN1, GBF1, TSNARE1, ARHGDIA, FBF1, PLK3, PEX16, MCOLN1, ALMS1, FHOD3, INCENP, AC005670.2, TESK2, NEDD1, GAS8, ARAP1, STX1B
GO:0006996	organelle organization	2585	34	21.5	899	0.00142	0.23116	0.591667	1	A process that is carried out at the cellular level which results in the assembly, arrangement of constituent parts, or disassembly of an organelle within a cell. An organelle is an organized structure of distinctive morphology and function. Includes the nucleus, mitochondria, plastids, vacuoles, vesicles, ribosomes and the cytoskeleton. Excludes the plasma membrane	1.16217	-1.14717	MIGA1, GDAP1, PRKAR2B, SLAIN2, G3BP2, PRKAA1, ASCC3, AGFG1, SH3D19, ATAD2B, TIMM17A, CENPQ, WWTR1, PHLDB2, COBLL1, TGFBR1, DSCC1, GTF2H2, CLIC4, PARP11, CLOCK, MAP3K1, ARPC1B, XPO1, MZT1, SRGAP2C, PEX11A, STAM, BNIP3L, CDK5R1, DNAAF4, ATF2, CEP126, TRNT1, KNL1, ASH1L, NAP1L3, NEK7, EID1, POC1B, ARHGAP18, ANP32E, CCNG1, TDG, TMED2, PHIP, ARF6, MAP3K2, SASS6, TNKS2, PRKAR1A, OSBPL8, RAB8B, HMGN5, C…	CRYAB, FZD5, CNIH2, AURKC, GRWD1, CDK11A, STMN3, CORO1A, EHD3, OMA1, PIF1, CHCHD10, WASL, SLX4, RIOX1, PLEKHF1, RNF2, RRP7BP, TBC1D3L, SEC24B, FLNA, ARID4B, ADAMTS16, RABGAP1L, LAMA5, NRF1, GGNBP1, MKLN1, PRELID3A, LRSAM1, SRC, TMEM175, CLIP3, WASHC4, FSD1, INF2, ATG2A, TOP3B, KLC1, TMOD1, ZKSCAN3, RTEL1, RAB31, CARM1, ATP2C1, ABRAXAS2, VPS51, TFEB, AXIN1, GBF1, KMT2B, TSNARE1, WDR62, ARHGDIA, FB…
GO:0003206	cardiac chamber morphogenesis	60	4	0.5	2079	0.00151	1	0.6	1	The process in which a cardiac chamber is generated and organized. A cardiac chamber is an enclosed cavity within the heart	0.60775	-0.358497	TGFBR1, RARB, RBPJ, PARVA, HIF1A, HEG1, MSX2, SOX4, CYR61, ADAMTS1, SMAD4, TBX3, WNT5A	ID2, COL11A1
GO:0045669	positive regulation of osteoblast differ...	28	3	0.23	6	0.00156	0.00156	0.6	1	Any process that activates or increases the frequency, rate or extent of osteoblast differentiation	0.471569	-0.328178	SMAD5, CTNNB1, MSX2, SUCO, CYR61, RUNX2	SMAD1, IL6R, CEBPD, CTNNBIP1
GO:0010952	positive regulation of peptidase activit...	106	5	0.88	2080	0.00183	1	0.660714	1	Any process that increases the frequency, rate or extent of peptidase activity, the hydrolysis of peptide bonds within proteins	0.570488	-0.291324	CARD8, DDX3X, REST, CDKN1B, PICALM, SIRT1, SENP1, EIF2AK3, ARL6IP5, SMAD3, CYR61, F2R
GO:0001886	endothelial cell morphogenesis	8	2	0.07	7	0.00185	0.00185	0.660714	1	The change in form (cell shape and size) that occurs during the differentiation of an endothelial cell	0.0999894	0.0999894	CLIC4, HEG1	COL18A1
GO:0019058	viral life cycle	342	9	2.85	16	0.00201	0.00657	0.690323	1	A set of processes which all viruses follow to ensure survival; includes attachment and entry of the virus particle, decoding of genome information, translation of viral mRNA by host ribosomes, genome replication, and assembly and release of viral particles containing the genome	0.728578	-0.482577	PKN2, XPO1, RAB5A, KPNA3, DDX3X, CHD1, DEK, REST, NUP58, KPNA1, TOP2A, RPL21, VPS4B, THOC7, DDX6, EFNB2, YTHDC2, UBP1, ITGAV, ROCK2, PDCD6IP, GTF2F2, CHMP2B, NUP160, CD55, POLR2K, RPS3A, CD46, RPS25, TRIM32, CCNT2, NUP155, NUCKS1	NECTIN1, TYRO3, ITGB3, LRSAM1, GAS6, ISG15
GO:0071897	DNA biosynthetic process	160	6	1.33	446	0.00208	0.09655	0.690323	1	The cellular DNA metabolic process resulting in the formation of DNA, deoxyribonucleic acid, one of the two main types of nucleic acid, consisting of a long unbranched macromolecule formed from one or two strands of linked deoxyribonucleotides, the 3'-phosphate group of each constituent deoxyribonucleotide being joined in 3',5'-phosphodiester linkage to the 5'-hydroxyl group of the deoxyribose mo…	0.809165	-0.458943	LIN9, DSCC1, NEK7, RMI1, GJA1, TNKS2, ATM, KLF4, DNA2, PCLAF, SIRT1, CTNNB1, BRIP1, POLK, RFC3, PTGES3, REV1, CHRAC1, NBN, POLD3, RPA3, BRCA1	PIF1, SRC, USP43, POLM, GNL3L, PNKP, ISG15
GO:0034645	cellular macromolecule biosynthetic proc...	3097	38	25.76	237	0.00235	0.0494	0.690323	1	The chemical reactions and pathways resulting in the formation of a macromolecule, any molecule of high relative molecular mass, the structure of which essentially comprises the multiple repetition of units derived, actually or conceptually, from molecules of low relative molecular mass, carried out by individual cells	1.15912	-1.24486	UFL1, LIN9, IL1RAP, SMAD5, SERP1, PRKAA1, PKN2, ASCC3, PPP1CB, ATAD2B, GDF6, DDX20, STRN3, UBE2D2, WWTR1, SECISBP2L, QKI, TGFBR1, DSCC1, GTF2H2, KLF5, CLOCK, ZRANB2, HOXA3, ZDHHC20, XPO1, POGLUT1, UHMK1, CDK5R1, GIGYF2, ATF2, AGL, UBE2J1, ASH1L, NUDT21, GALNT7, ZNF618, NEK7, RPS6KA3, PIGB, FUBP3, EID1, RMI1, GJA1, TDG, PHIP, MRPS18C, MAP3K2, RBMS3, ST6GALNAC5, MED13, PHF6, SKIL, NUFIP1, ELAVL2, T…	HTRA1, SPP1, FZD5, HOXB9, HMOX1, GRWD1, MIER3, LZTS1, CDK11A, DYRK1B, ZNF41, ZNF17, B3GNT3, ADAMTSL4, ZNF512B, PIF1, CRTC1, B3GNT9, ZNF777, ZNF219, ZBTB7A, ZNF480, WASL, SLX4, ZNF85, ZNF446, MAN2A2, RIOX1, ZNF16, EFEMP1, MAP3K10, EOGT, ABCA7, RNF2, MAP3K9, ZBTB45, E2F8, ISL2, ZNF213, CBFA2T2, FLNA, ARID4B, MNT, MED26, ZNF414, MZF1, PTCH1, NRF1, YAP1, ZNF142, ZNF329, ZNF200, AC138696.1, ZNF669, ZN…
GO:0006338	chromatin remodeling	115	5	0.96	62	0.00262	0.01413	0.690323	1	Dynamic structural changes to eukaryotic chromatin occurring throughout the cell division cycle. These changes range from the local changes necessary for transcriptional regulation to global changes necessary for chromosome segregation	0.671353	-0.335076	CENPQ, KNL1, ANP32E, CHD1, DEK, CTNNB1, RB1, CENPK, MYSM1, H3F3A, ITGB3BP, CHRAC1, MIS18BP1, TOP1, KAT2B, BPTF, SMARCE1	RIOX1, KMT2B
GO:0008380	RNA splicing	358	9	2.98	560	0.00273	0.12788	0.690323	1	The process of removing sections of the primary RNA transcript to remove sequences not present in the mature form of the RNA and joining the remaining sections to form the mature form of the RNA	0.869781	-0.450477	DDX20, PRPF39, MBNL2, QKI, ZRANB2, PRPF38B, NUDT21, ELAVL2, PSIP1, LSM5, HNRNPA3, PTBP2, THOC7, PNN, CELF1, WTAP, ZNF326, SRSF1, YTHDC1, KHDRBS1, DYRK1A, CWC15, PPP4R2, MAGOHB, RNPC3, TSEN2, TSEN15, PAPOLA, GTF2F2, SNRPE, SFPQ, POLR2K, CWC27, RBM22, NSRP1, PTBP3, ZPR1, PPIL1, PPIG	MTREX, AC009690.3, SRPK3, PRPF40B, WDR62, WDR33
GO:0003151	outflow tract morphogenesis	34	3	0.28	152	0.00275	0.02976	0.690323	1	The process in which the anatomical structures of the outflow tract are generated and organized. The outflow tract is the portion of the heart through which blood flows into the arteries	0.584822	-0.278981	ATF2, RARB, RBPJ, PARVA, HIF1A, CTNNB1, MSX2, SMAD4, TBX3, WNT5A	SEC24B
GO:0007010	cytoskeleton organization	741	14	6.16	796	0.0028	0.19787	0.690323	1	A process that is carried out at the cellular level which results in the assembly, arrangement of constituent parts, or disassembly of cytoskeletal structures	0.989582	-0.963734	SLAIN2, AGFG1, SH3D19, PHLDB2, COBLL1, TGFBR1, CLIC4, MAP3K1, ARPC1B, XPO1, MZT1, SRGAP2C, CDK5R1, DNAAF4, CEP126, NEK7, ARHGAP18, PHIP, ARF6, MAP3K2, SASS6, PRKAR1A, GMFB, HOOK3, CHORDC1, EDN1, CDK1, SLC16A1, SSH2, TUBD1, ATXN7, DNAAF2, MYO1B, USP33, FIGNL1, CORO2A, RICTOR, PARVA, CD2AP, MARCKS, ARPC5, AJUBA, PCLAF, GAS2L3, CDKN1B, KIF18A, ADD3, PKD2, MTPN, MYPN, DPYSL2, CTNNB1, TUBB2A, VPS4B, O…	CRYAB, AURKC, STMN3, CORO1A, WASL, FLNA, LAMA5, MKLN1, SRC, CLIP3, INF2, TMOD1, ATP2C1, ABRAXAS2, AXIN1, WDR62, ARHGDIA, PLK3, MAP2, ALMS1, FHOD3, TESK2, GAS8, ARAP1, AGRN, PARD6A, BRSK1
GO:0003007	heart morphogenesis	117	5	0.97	2081	0.00282	1	0.690323	1	The developmental process in which the heart is generated and organized. The heart is a hollow, muscular organ, which, by contracting rhythmically, keeps up the circulation of the blood	0.6962	-0.460644	TGFBR1, ATF2, TMED2, RARB, RBPJ, PARVA, HIF1A, PKD2, HEG1, CTNNB1, MSX2, SNAI2, PTK2, SOX4, SMAD3, CYR61, ADAMTS1, SMAD4, TBX3, WNT5A	SEC24B, PTCH1, YAP1, ID2, ADAM15, COL11A1
GO:0043604	amide biosynthetic process	585	12	4.87	64	0.00298	0.01547	0.690323	1	The chemical reactions and pathways resulting in the formation of an amide, any derivative of an oxoacid in which an acidic hydroxy group has been replaced by an amino or substituted amino group	0.955125	-0.405479	SERP1, PRKAA1, SGMS1, SECISBP2L, QKI, GTF2H2, UHMK1, GIGYF2, RPS6KA3, MRPS18C, RBMS3, UGCG, SRP9, EEF2K, DDX3X, EEF1E1, CPS1, RPL22L1, IREB2, AJUBA, CNOT8, MTPN, RPL21, MRPL33, DDX6, AGO2, CELF1, GCLC, EIF4G3, DENR, PTCD3, CHAC2, FXR1, EIF2AK3, KHDRBS1, GFM1, ZFP36L2, SOX4, MRPL30, MRPL35, TOB1, SMAD3, CYR61, EIF2S1, LARP4, GUF1, FOXO3, GGCT, RPS3A, SAMD8, TRMT10C, IGF2BP3, RPS25, MRPL47, TNRC6B,…	SMAD1, AASDH
GO:0001885	endothelial cell development	35	3	0.29	795	0.00299	0.19738	0.690323	1	The progression of an endothelial cell over time, from its formation to the mature structure	0.433986	-0.284716	CLIC4, HEG1, CTNNB1, ROCK1, ROCK2	COL18A1
GO:0019985	translesion synthesis	36	3	0.3	503	0.00324	0.11508	0.690323	1	The replication of damaged DNA by synthesis across a lesion in the template strand; a specialized DNA polymerase or replication complex inserts a defined nucleotide across from the lesion which allows DNA synthesis to continue beyond the lesion. This process can be mutagenic depending on the damaged nucleotide and the inserted nucleotide	0.414032	-0.236805	PCLAF, POLK, RFC3, REV1, POLD3, RPA3	USP43, ISG15
GO:0060411	cardiac septum morphogenesis	36	3	0.3	9	0.00324	0.00324	0.690323	1	The process in which the anatomical structure of a cardiac septum is generated and organized. A cardiac septum is a partition that separates parts of the heart	0.544633	-0.312664	TGFBR1, RARB, PARVA, MSX2, SOX4, CYR61, SMAD4, TBX3, WNT5A	ID2
GO:0034248	regulation of cellular amide metabolic p...	299	8	2.49	142	0.00325	0.02597	0.690323	1	Any process that modulates the frequency, rate or extent of the chemical reactions and pathways involving amides	0.893677	-0.424173	SERP1, PRKAA1, SECISBP2L, QKI, UHMK1, GIGYF2, RPS6KA3, RBMS3, SRP9, DDX3X, IREB2, AJUBA, CNOT8, PICALM, MTPN, DDX6, AGO2, CELF1, EIF4G3, PTCD3, FXR1, EIF2AK3, KHDRBS1, ZFP36L2, SOX4, TOB1, SMAD3, CYR61, EIF2S1, LARP4, FOXO3, SAMD8, TRMT10C, IGF2BP3, TNRC6B, PA2G4, CNOT6	ABCA7, SMAD1, PLK3
GO:0019079	viral genome replication	74	4	0.62	102	0.00327	0.02188	0.690323	1	Any process involved directly in viral genome replication, including viral nucleotide metabolism	0.605842	-0.296018	PKN2, RAB5A, DDX3X, DEK, TOP2A, YTHDC2, UBP1, ROCK2, NUCKS1	GAS6, ISG15
GO:0043280	positive regulation of cysteine-type end...	76	4	0.63	10	0.0036	0.0036	0.690323	1	Any process that activates or increases the activity of a cysteine-type endopeptidase involved in the apoptotic process	0.556485	-0.230706	CARD8, DDX3X, REST, CDKN1B, SIRT1, SENP1, EIF2AK3, ARL6IP5, SMAD3, CYR61, F2R
GO:0003281	ventricular septum development	38	3	0.32	11	0.00378	0.00378	0.690323	1	The progression of the ventricular septum over time from its formation to the mature structure	0.472647	-0.318456	TGFBR1, HEG1, SOX4, CYR61, SMAD4, TBX3, WNT5A	ID2
GO:0006412	translation	525	11	4.37	94	0.00383	0.02065	0.690323	1	The cellular metabolic process in which a protein is formed, using the sequence of a mature mRNA molecule to specify the sequence of amino acids in a polypeptide chain. Translation is mediated by the ribosome, and begins with the formation of a ternary complex between aminoacylated initiator methionine tRNA, GTP, and initiation factor 2, which subsequently associates with the small subunit of the…	0.885355	-0.389866	SERP1, SECISBP2L, QKI, GTF2H2, UHMK1, GIGYF2, RPS6KA3, MRPS18C, RBMS3, SRP9, EEF2K, DDX3X, EEF1E1, RPL22L1, IREB2, AJUBA, CNOT8, MTPN, RPL21, MRPL33, DDX6, AGO2, CELF1, EIF4G3, DENR, PTCD3, FXR1, EIF2AK3, KHDRBS1, GFM1, ZFP36L2, SOX4, MRPL30, MRPL35, TOB1, SMAD3, EIF2S1, LARP4, GUF1, FOXO3, RPS3A, TRMT10C, IGF2BP3, RPS25, MRPL47, TNRC6B, TARSL2, PA2G4, CNOT6, ABCE1	SMAD1
GO:0051276	chromosome organization	856	15	7.12	1159	0.00401	0.32576	0.690323	1	A process that is carried out at the cellular level that results in the assembly, arrangement of constituent parts, or disassembly of chromosomes, structures composed of a very long molecule of DNA and associated proteins that carries hereditary information. This term covers covalent modifications at the molecular level as well as spatial relationships among the major components of a chromosome	0.975176	-0.668043	PRKAA1, ASCC3, ATAD2B, CENPQ, DSCC1, GTF2H2, CLOCK, XPO1, ATF2, KNL1, ASH1L, NAP1L3, NEK7, EID1, ANP32E, TDG, TNKS2, HMGN5, ATM, LEMD3, CHAMP1, PRDM2, CDK1, BMI1, ATXN7, DDX3X, DNA2, KMT2C, KAT6A, CHD1, DEK, PPP1CC, NAA50, CUL4B, MIER1, REST, SUZ12, CHD6, KIF18A, TBL1XR1, ASF1A, SIRT1, NSD3, TOP2A, CTNNB1, BRIP1, MTERF1, RB1, VPS4B, GINS4, CENPK, TAF1, MYSM1, RECQL, CDC27, RAD21, CCNE2, RFC3, SUD…	AURKC, GRWD1, PIF1, SLX4, RIOX1, RNF2, ARID4B, SRC, TOP3B, RTEL1, CARM1, KMT2B, TDRD3, GNL3L, KDM5D, PNKP, MTA1, SIN3A, INCENP, SUPT3H, XPC, EPC1
GO:0045778	positive regulation of ossification	39	3	0.32	2082	0.00407	1	0.690323	1	Any process that activates or increases the frequency, rate or extent of bone formation	0.530026	-0.383961	SMAD5, CTNNB1, MSX2, TOB2, SUCO, SMAD3, CYR61, WNT5A, RUNX2	SMAD1, IL6R, CEBPD, CTNNBIP1, ISG15
GO:0009059	macromolecule biosynthetic process	3184	38	26.49	312	0.00409	0.06961	0.690323	1	The chemical reactions and pathways resulting in the formation of a macromolecule, any molecule of high relative molecular mass, the structure of which essentially comprises the multiple repetition of units derived, actually or conceptually, from molecules of low relative molecular mass	1.15912	-1.24486	UFL1, LIN9, IL1RAP, SMAD5, SERP1, PRKAA1, PKN2, ASCC3, PPP1CB, ATAD2B, GDF6, DDX20, STRN3, UBE2D2, WWTR1, SECISBP2L, QKI, TGFBR1, DSCC1, GTF2H2, KLF5, NMD3, CLOCK, ZRANB2, HOXA3, ZDHHC20, XPO1, POGLUT1, UHMK1, CDK5R1, GIGYF2, ATF2, AGL, UBE2J1, ASH1L, NUDT21, GALNT7, ZNF618, NEK7, UGDH, RPS6KA3, PIGB, FUBP3, EID1, RMI1, GJA1, TDG, PHIP, MRPS18C, MAP3K2, RBMS3, ST6GALNAC5, MED13, PHF6, SKIL, NUFIP…	HTRA1, SPP1, FZD5, HOXB9, HMOX1, GRWD1, MIER3, LZTS1, CDK11A, DYRK1B, ZNF41, ZNF17, B3GNT3, ADAMTSL4, ZNF512B, PIF1, CRTC1, B3GNT9, ZNF777, ZNF219, ZBTB7A, ZNF480, WASL, SLX4, ZNF85, ZNF446, MAN2A2, RIOX1, ZNF16, EFEMP1, MAP3K10, EOGT, ABCA7, RNF2, MAP3K9, ZBTB45, E2F8, ISL2, ZNF213, CBFA2T2, FLNA, ARID4B, MNT, MED26, ZNF414, MZF1, PTCH1, ITGB3, NRF1, YAP1, ZNF142, ZNF329, ZNF200, AC138696.1, ZNF…
GO:2001056	positive regulation of cysteine-type end...	81	4	0.67	2083	0.00453	1	0.690323	1	Any process that activates or increases the frequency, rate or extent of cysteine-type endopeptidase activity	0.556485	-0.251195	CARD8, DDX3X, REST, CDKN1B, SIRT1, SENP1, EIF2AK3, ARL6IP5, SMAD3, CYR61, F2R
GO:0006518	peptide metabolic process	616	12	5.12	101	0.00453	0.02165	0.690323	1	The chemical reactions and pathways involving peptides, compounds of two or more amino acids where the alpha carboxyl group of one is bound to the alpha amino group of another	0.911773	-0.506631	SERP1, SECISBP2L, QKI, ERAP1, GTF2H2, UHMK1, GIGYF2, RPS6KA3, CARNMT1, MRPS18C, RBMS3, SRP9, EEF2K, DDX3X, EEF1E1, RPL22L1, IREB2, AJUBA, CNOT8, PICALM, IMMP1L, MTPN, RPL21, MRPL33, DDX6, AGO2, CELF1, GCLC, EIF4G3, DENR, PTCD3, CHAC2, FXR1, EIF2AK3, KHDRBS1, GFM1, ZFP36L2, SOX4, MRPL30, MRPL35, TOB1, PCSK7, SMAD3, EIF2S1, LARP4, GUF1, FOXO3, GGCT, RPS3A, TRMT10C, IGF2BP3, RPS25, MRPL47, TNRC6B, T…	GSTM4, ABCA7, MGST1, SMAD1, GAS6, AASDH, PLK3
GO:0034622	cellular macromolecular complex assembly	699	13	5.82	648	0.00461	0.15281	0.690323	1	The aggregation, arrangement and bonding together of a set of macromolecules to form a complex, carried out at the cellular level	0.996638	-0.640929	SLAIN2, G3BP2, DDX20, PRPF39, CENPQ, COBLL1, GTF2H2, ARPC1B, MZT1, DNAAF4, KNL1, NAP1L3, ARHGAP18, TMED2, ARF6, NUFIP1, ATM, CAND1, GMFB, TMEM33, DDX3X, PSIP1, KAT6A, DNAAF2, TBCA, PDGFC, CUL4B, RICTOR, ARPC5, CDKN1B, PICALM, IMMP1L, MTPN, ASF1A, PTBP2, PIK3C2A, VBP1, RB1, TFAM, CENPK, TAF1, DDX6, AGO2, ATF7IP, ANLN, CELF1, OPA1, CAPZA1, DENR, H3F3A, PTK2, SRSF1, ARFIP1, PTGES3, YTHDC1, TAF9B, IT…	GRWD1, CORO1A, PILRB, WASL, RRP7BP, SEC24B, SMAD1, SRC, CLIP3, MED25, SRPK3, TMOD1, BRF1, AXIN1, FHOD3, NDUFS7, STX1B, SOX12, XPC
GO:0043043	peptide biosynthetic process	539	11	4.48	104	0.00467	0.02415	0.690323	1	The chemical reactions and pathways resulting in the formation of peptides, compounds of 2 or more (but usually less than 100) amino acids where the alpha carboxyl group of one is bound to the alpha amino group of another. This may include the translation of a precursor protein and its subsequent processing into a functional peptide	0.885355	-0.401918	SERP1, SECISBP2L, QKI, GTF2H2, UHMK1, GIGYF2, RPS6KA3, MRPS18C, RBMS3, SRP9, EEF2K, DDX3X, EEF1E1, RPL22L1, IREB2, AJUBA, CNOT8, MTPN, RPL21, MRPL33, DDX6, AGO2, CELF1, GCLC, EIF4G3, DENR, PTCD3, CHAC2, FXR1, EIF2AK3, KHDRBS1, GFM1, ZFP36L2, SOX4, MRPL30, MRPL35, TOB1, SMAD3, EIF2S1, LARP4, GUF1, FOXO3, GGCT, RPS3A, TRMT10C, IGF2BP3, RPS25, MRPL47, TNRC6B, TARSL2, PA2G4, CNOT6, ABCE1	SMAD1, AASDH
GO:0006312	mitotic recombination	41	3	0.34	12	0.00469	0.00469	0.690323	1	The exchange, reciprocal or nonreciprocal, of genetic material between one DNA molecule and a homologous region of DNA that occurs during mitotic cell cycles	0.448735	-0.196594	DNA2, TOP2A, RFC3, POLD3, GEN1, RPA3, TOP2B
GO:0044403	symbiosis, encompassing mutualism throug...	702	13	5.84	1079	0.00478	0.29139	0.690323	1	An interaction between two organisms living together in more or less intimate association. The term host is usually used for the larger (macro) of the two members of a symbiosis. The smaller (micro) member is called the symbiont organism. Microscopic symbionts are often referred to as endosymbionts. The various forms of symbiosis include parasitism, in which the association is disadvantageous or …	0.847569	-0.805611	PKN2, CUL5, TRAM1, XPO1, BNIP3L, ELMOD2, RAB5A, KPNA3, CREBZF, POLR3G, DDX3X, PSIP1, MORC3, CHD1, DEK, REST, NUP58, KPNA1, SIRT1, TOP2A, RPL21, AP1S2, CTNNB1, RB1, VPS4B, THOC7, TAF1, DDX6, ATF7IP, EFNB2, AP1S3, EIF4G3, YTHDC2, POLR3K, CTNND1, IPO7, UBP1, RNGTT, CHUK, ANKRD17, ITGAV, PRMT6, DYRK1A, TOP1, URI1, ROCK2, TAF4, SMAD3, KAT2B, PDCD6IP, GTF2F2, CHMP2B, NUP160, CD55, POLR2K, GBP1, RPS3A, …	HTRA1, NECTIN1, CRTC1, ACTA2, TYRO3, ITGB3, LRSAM1, SRC, GAS6, KLC1, CARM1, GBF1, IKBKG, VRK2, SIN3A, RBCK1, PARD6A, ISG15
GO:0043603	cellular amide metabolic process	704	13	5.86	99	0.00489	0.02139	0.690323	1	The chemical reactions and pathways involving an amide, any derivative of an oxoacid in which an acidic hydroxy group has been replaced by an amino or substituted amino group, as carried out by individual cells	0.971981	-0.507308	SERP1, PRKAA1, SGMS1, SECISBP2L, QKI, ERAP1, GTF2H2, UHMK1, GIGYF2, RPS6KA3, CARNMT1, MRPS18C, RBMS3, UGCG, SRP9, EEF2K, DDX3X, EEF1E1, SLC25A32, CPS1, RPL22L1, IREB2, AJUBA, CNOT8, PICALM, IMMP1L, MTPN, RPL21, MRPL33, DDX6, AGO2, CELF1, GCLC, EIF4G3, SLC46A1, DENR, PTCD3, CHAC2, FXR1, EIF2AK3, KHDRBS1, GFM1, ZFP36L2, SOX4, MRPL30, MRPL35, TOB1, PCSK7, SMAD3, CYR61, EIF2S1, LARP4, GUF1, FOXO3, GG…	GSTM4, ABCA7, MGST1, SMAD1, GAS6, AASDH, PLK3
GO:0044419	interspecies interaction between organis...	704	13	5.86	1083	0.00489	0.29483	0.690323	1	Any process in which an organism has an effect on an organism of a different species	0.847569	-0.805611	PKN2, CUL5, TRAM1, XPO1, BNIP3L, ELMOD2, RAB5A, KPNA3, CREBZF, POLR3G, DDX3X, PSIP1, MORC3, CHD1, DEK, REST, NUP58, KPNA1, SIRT1, TOP2A, RPL21, AP1S2, CTNNB1, RB1, VPS4B, THOC7, TAF1, DDX6, ATF7IP, EFNB2, AP1S3, EIF4G3, YTHDC2, POLR3K, CTNND1, IPO7, UBP1, RNGTT, CHUK, ANKRD17, ITGAV, PRMT6, DYRK1A, TOP1, URI1, ROCK2, TAF4, SMAD3, KAT2B, PDCD6IP, GTF2F2, CHMP2B, NUP160, CD55, POLR2K, GBP1, RPS3A, …	HTRA1, NECTIN1, CRTC1, ACTA2, TYRO3, ITGB3, LRSAM1, SRC, GAS6, KLC1, CARM1, GBF1, IKBKG, VRK2, SIN3A, RBCK1, PARD6A, ISG15
GO:0003205	cardiac chamber development	83	4	0.69	2084	0.00494	1	0.690323	1	The progression of a cardiac chamber over time, from its formation to the mature structure. A cardiac chamber is an enclosed cavity within the heart	0.60775	-0.361753	TGFBR1, RARB, RBPJ, PARVA, HIF1A, HEG1, MSX2, SOX4, CYR61, ADAMTS1, SMAD4, TBX3, WNT5A	ID2, COL11A1
GO:0051346	negative regulation of hydrolase activit...	192	6	1.6	1110	0.00512	0.30413	0.690323	1	Any process that stops or reduces the rate of hydrolase activity, the catalysis of the hydrolysis of various bonds	0.795431	-0.55457	CRIM1, TIPRL, KNL1, RPS6KA3, TMED2, SH3RF2, KLF4, DDX3X, BIRC6, TNFAIP8, FNIP1, PICALM, SIRT1, TFPI, ROCK1, BAG4, ARL6IP1, URI1, ROCK2, SH3RF1, SYTL2, CNN3, NIFK, PRDX3, ABCE1	NEIL1, WDR81, PLXNB3, WFIKKN1, LMTK3, SRC, DLG3, GAS6, POR
GO:0006397	mRNA processing	395	9	3.29	13	0.00523	0.00523	0.690323	1	Any process involved in the conversion of a primary mRNA transcript into one or more mature mRNA(s) prior to translation into polypeptide	0.900989	-0.489664	DDX20, PRPF39, MBNL2, QKI, GTF2H2, ZRANB2, PRPF38B, NUDT21, ELAVL2, PSIP1, LSM5, HNRNPA3, PTBP2, THOC7, PNN, CELF1, WTAP, ZNF326, RNGTT, SRSF1, YTHDC1, KHDRBS1, DYRK1A, CWC15, RNF20, PPP4R2, MAGOHB, PAN3, RNPC3, TSEN2, TSEN15, LSM11, PAPOLA, GTF2F2, CDC73, SNRPE, SFPQ, POLR2K, CWC27, RBM22, NSRP1, PTBP3, ZPR1, PPIL1	CDK11A, MTREX, AC009690.3, SRPK3, PRPF40B, WDR33
GO:0046661	male sex differentiation	86	4	0.72	14	0.0056	0.0056	0.690323	1	The establishment of the sex of a male organism by physical differentiation	0.688291	-0.412034	SMAD5, TGFBR1, LGR4, FNDC3A, HMGCS1, KIF18A, CTNNB1, BRIP1, H3F3A, KLHL26, SMAD4, CTNNA1, TBX3, WNT5A	MGST1, ARID4B, AMH, ADAM15, SCX
GO:0000278	mitotic cell cycle	801	14	6.66	141	0.00565	0.02559	0.690323	1	Progression through the phases of the mitotic cell cycle, the most common eukaryotic cell cycle, which canonically comprises four successive phases called G1, S, G2, and M and includes replication of the genome and the subsequent segregation of chromosomes into daughter cells. In some variant cell cycles nuclear replication or nuclear division may not be followed by cell division, or G1 and G2 ph…	0.967631	-0.677315	PRKAR2B, PKN2, PPP1CB, CUL5, DSCC1, MZT1, GIGYF2, ATF2, CEP126, KNL1, NEK7, CCNG1, PHIP, ATM, CHAMP1, BACH1, MYBL1, EDN1, CDK1, DDX3X, DNA2, BIRC6, SKP2, NAA50, TOPBP1, FOXN3, CDK8, CUL4B, CD2AP, AJUBA, NPAT, LRRCC1, ADAM17, NUP58, CDKN1B, CNOT8, KIF18A, PKD2, SIRT1, TOP2A, RINT1, CTNNB1, YWHAG, RB1, VPS4B, CCP110, PPP1R12A, ANLN, CDC27, RAD21, CCNE2, ARPP19, BORA, ANKRD17, VRK1, FBXW11, ITGB3BP,…	AURKC, LZTS1, CDK11A, WASL, RNF2, E2F8, FLNA, PTCH1, TMEM8B, MRNIP, FSD1, ID2, FBXL15, RTEL1, CARM1, ABRAXAS2, GBF1, WDR62, PLK3, ALMS1, SIN3A, INCENP, CLSPN, NEDD1, XPC
GO:0032479	regulation of type I interferon producti...	87	4	0.72	2085	0.00583	1	0.690323	1	Any process that modulates the frequency, rate, or extent of interferon type I production. Type I interferons include the interferon-alpha, beta, delta, episilon, zeta, kappa, tau, and omega gene families	0.521046	-0.32457	POLR3G, DDX3X, DTX4, CTNNB1, POLR3K, CHUK, POLR2K, TRIM32	ISG15
GO:0032606	type I interferon production	88	4	0.73	2086	0.00607	1	0.690323	1	The appearance of type I interferon due to biosynthesis or secretion following a cellular stimulus, resulting in an increase in its intracellular or extracellular levels. Type I interferons include the interferon-alpha, beta, delta, episilon, zeta, kappa, tau, and omega gene families	0.521046	-0.32457	POLR3G, DDX3X, DTX4, CTNNB1, POLR3K, CHUK, POLR2K, TRIM32	ISG15
GO:0010950	positive regulation of endopeptidase act...	89	4	0.74	2087	0.00632	1	0.690323	1	Any process that increases the frequency, rate or extent of endopeptidase activity, the endohydrolysis of peptide bonds within proteins	0.556485	-0.274099	CARD8, DDX3X, REST, CDKN1B, SIRT1, SENP1, EIF2AK3, ARL6IP5, SMAD3, CYR61, F2R
GO:0006301	postreplication repair	46	3	0.38	742	0.00649	0.18443	0.690323	1	The conversion of DNA-damage induced single-stranded gaps into large molecular weight DNA after replication. Includes pathways that remove replication-blocking lesions in conjunction with DNA replication	0.458411	-0.277934	PCLAF, POLK, RFC3, REV1, POLD3, UBE2N, RPA3, BRCA1	USP43, WDR33, ISG15
GO:0006383	transcription from RNA polymerase III pr...	46	3	0.38	15	0.00649	0.00649	0.690323	1	The synthesis of RNA from a DNA template by RNA polymerase III, originating at an RNAP III promoter	0.431152	-0.290607	POLR3G, ZC3H8, POLR3K, BRCA1, POLR2K	BRF1, SNAPC4
GO:0003156	regulation of animal organ formation	15	2	0.12	484	0.00668	0.10903	0.690323	1	Any process that modulates the rate, frequency or extent of organ formation. Organ formation is the process pertaining to the initial formation of an organ from unspecified parts. The process begins with the specific processes that contribute to the appearance of the discrete structure, such as inductive events, and ends when the structural rudiment of the organ is recognizable, such as a condens…	0.159903	-0.133295	CTNNB1, WNT5A
GO:0051016	barbed-end actin filament capping	15	2	0.12	17	0.00668	0.00668	0.690323	1	The binding of a protein or protein complex to the barbed (or plus) end of an actin filament, thus preventing the addition, exchange or removal of further actin subunits	0.217418	-0.0654091	MTPN, CAPZA1
GO:1902692	regulation of neuroblast proliferation	15	2	0.12	18	0.00668	0.00668	0.690323	1	Any process that modulates the frequency, rate or extent of neuroblast proliferation	0.176708	-0.231913	HIF1A, CTNNB1, CTNNA1	KCTD11
GO:0010557	positive regulation of macromolecule bio...	995	16	8.28	559	0.00677	0.12741	0.690323	1	Any process that increases the rate, frequency or extent of the chemical reactions and pathways resulting in the formation of a macromolecule, any molecule of high relative molecular mass, the structure of which essentially comprises the multiple repetition of units derived, actually or conceptually, from molecules of low relative molecular mass	1.01657	-0.935675	SMAD5, SERP1, ATAD2B, GDF6, WWTR1, TGFBR1, DSCC1, KLF5, NMD3, CLOCK, UHMK1, ATF2, ASH1L, NEK7, RPS6KA3, FUBP3, PHIP, MAP3K2, RBMS3, MED13, NUFIP1, TNKS2, HMGN5, ATM, FOSL2, ARMCX3, CAND1, RNF6, LGR4, RARB, BACH1, MYBL1, FLI1, EDN1, KLF4, PRDM2, CDK1, NR1D2, ATXN7, ZFHX3, DDX3X, DNA2, KAT6A, CHD1, RBPJ, FOXN3, PDGFC, DLX1, CDK8, NFIB, CCNC, TRIM24, HIF1A, REST, NPAT, CHD6, PICALM, PKD2, TBL1XR1, M…	SPP1, FZD5, HOXB9, HMOX1, DYRK1B, CRTC1, E2F8, ARID4B, MZF1, PTCH1, NRF1, YAP1, ZNF567, SMAD1, SRC, MED25, ID2, ZEB1, ZKSCAN3, BRF1, CARM1, JUNB, TFEB, AXIN1, KMT2B, IKBKG, CEBPD, MYO6, PNKP, MEIS3, PIAS2, DBP, SIN3A, FLT3LG, AGRN, MED16, SOX12, SCX, ZBTB7B, SUPT3H, ZFP90, GLI2, GLIS2, EPC1, TCEA2
GO:0010951	negative regulation of endopeptidase act...	92	4	0.77	2088	0.0071	1	0.690323	1	Any process that decreases the frequency, rate or extent of endopeptidase activity, the endohydrolysis of peptide bonds within proteins	0.690272	-0.378755	CRIM1, RPS6KA3, KLF4, DDX3X, BIRC6, TNFAIP8, FNIP1, PICALM, TFPI, ARL6IP1, SH3RF1, PRDX3	WFIKKN1, SRC, GAS6, POR
GO:0045815	positive regulation of gene expression, ...	48	3	0.4	246	0.00731	0.05665	0.690323	1	Any epigenetic process that activates or increases the rate of gene expression	0.57307	-0.25295	ATAD2B, TAF1A, DEK, ASF1A, CTNNB1, H3F3A, KAT2B, POLR2K	KMT2B
GO:0051173	positive regulation of nitrogen compound...	1097	17	9.13	769	0.00748	0.19118	0.690323	1	Any process that activates or increases the frequency, rate or extent of the chemical reactions and pathways involving nitrogen or nitrogenous compounds	1.03973	-0.905881	SMAD5, SERP1, PRKAA1, ATAD2B, GDF6, WWTR1, TGFBR1, DSCC1, KLF5, NMD3, CLOCK, UHMK1, ATF2, ASH1L, NEK7, RPS6KA3, FUBP3, PHIP, MAP3K2, RBMS3, MED13, NUFIP1, TNKS2, HMGN5, ATM, FOSL2, ARMCX3, CAND1, RNF6, LGR4, RARB, BACH1, MYBL1, FLI1, EDN1, KLF4, PRDM2, CDK1, NR1D2, ATXN7, ZFHX3, DDX3X, DNA2, KAT6A, CHD1, RBPJ, FOXN3, PDGFC, DLX1, CDK8, NFIB, CCNC, TRIM24, HIF1A, REST, NPAT, CHD6, CNOT8, RIOK2, PI…	SPP1, FZD5, HOXB9, DYRK1B, CRTC1, SLX4, E2F8, ARID4B, MZF1, PTCH1, NRF1, YAP1, MRNIP, ZNF567, SMAD1, SRC, MED25, ID2, ZEB1, ZKSCAN3, BRF1, RTEL1, CARM1, JUNB, TFEB, AXIN1, KMT2B, IKBKG, CEBPD, PLK3, MYO6, PNKP, MEIS3, PIAS2, DBP, TMEM161A, SIN3A, FLT3LG, AGRN, MED16, SOX12, SCX, ZBTB7B, SUPT3H, ZFP90, GLI2, GLIS2, EPC1, TCEA2
GO:0042276	error-prone translesion synthesis	16	2	0.13	19	0.0076	0.0076	0.690323	1	The conversion of DNA-damage induced single-stranded gaps into large molecular weight DNA after replication by using a specialized DNA polymerase or replication complex to insert a defined nucleotide across the lesion. This process does not remove the replication-blocking lesions and causes an increase in the endogenous mutation level. For example, in E. coli, a low fidelity DNA polymerase, pol V…	0.297536	0.0121618	POLK, RFC3, REV1, RPA3
GO:0043153	entrainment of circadian clock by photop...	16	2	0.13	20	0.0076	0.0076	0.690323	1	The synchronization of a circadian rhythm to photoperiod, the intermittent cycle of light (day) and dark (night)	0.311874	-0.272315	PPP1CB, FBXL3, PPP1CC	CRTC1, ID2, MTA1
GO:0010466	negative regulation of peptidase activit...	94	4	0.78	2089	0.00765	1	0.690323	1	Any process that stops or reduces the rate of peptidase activity, the hydrolysis of peptide bonds within proteins	0.690272	-0.378755	CRIM1, RPS6KA3, KLF4, DDX3X, BIRC6, TNFAIP8, FNIP1, PICALM, TFPI, ARL6IP1, SH3RF1, PRDX3	WFIKKN1, SRC, GAS6, POR
GO:0044271	cellular nitrogen compound biosynthetic ...	3073	36	25.56	509	0.00811	0.11771	0.690323	1	The chemical reactions and pathways resulting in the formation of organic and inorganic nitrogenous compounds	1.15525	-1.24117	UFL1, LIN9, IL1RAP, SMAD5, SERP1, PRKAA1, PKN2, ASCC3, ATAD2B, GDF6, SGMS1, DDX20, STRN3, UBE2D2, WWTR1, DCK, SECISBP2L, QKI, TGFBR1, DSCC1, GTF2H2, KLF5, NMD3, CLOCK, ZRANB2, HOXA3, XPO1, UHMK1, CDK5R1, GIGYF2, ATF2, ASH1L, NUDT21, ZNF618, NEK7, UGDH, RPS6KA3, FUBP3, EID1, RMI1, GJA1, TDG, PHIP, MRPS18C, MAP3K2, RBMS3, MED13, PHF6, SKIL, NUFIP1, ELAVL2, TNKS2, PRKAR1A, HMGN5, ATM, FOSL2, UGCG, A…	HTRA1, SPP1, FZD5, HOXB9, HMOX1, LTB4R2, MIER3, LZTS1, CDK11A, DYRK1B, ZNF41, ZNF17, ZNF512B, PIF1, CRTC1, CHCHD10, ZNF777, ZNF219, ZBTB7A, ZNF480, WASL, ZNF85, ZNF446, RIOX1, ZNF16, EFEMP1, MAP3K10, RNF2, MAP3K9, ZBTB45, E2F8, ISL2, ZNF213, CBFA2T2, FLNA, ARID4B, MNT, MED26, ZNF414, MZF1, PTCH1, IBA57, NRF1, YAP1, ZNF142, ZNF329, ZNF200, AC138696.1, ZNF669, ZNF567, HOXB6, SMAD1, FOXO6, SRC, MED2…
GO:0000375	RNA splicing, via transesterification re...	278	7	2.31	21	0.00813	0.00813	0.690323	1	Splicing of RNA via a series of two transesterification reactions	0.772504	-0.429201	DDX20, PRPF39, MBNL2, NUDT21, ELAVL2, PSIP1, LSM5, HNRNPA3, PTBP2, PNN, CELF1, WTAP, SRSF1, YTHDC1, KHDRBS1, DYRK1A, CWC15, MAGOHB, RNPC3, PAPOLA, GTF2F2, SNRPE, SFPQ, POLR2K, CWC27, RBM22, NSRP1, PPIL1	MTREX, AC009690.3, SRPK3, PRPF40B, WDR33
GO:2000573	positive regulation of DNA biosynthetic ...	50	3	0.42	1099	0.00818	0.30134	0.690323	1	Any process that activates or increases the frequency, rate or extent of DNA biosynthetic process	0.628106	-0.296631	DSCC1, NEK7, TNKS2, ATM, KLF4, CTNNB1, RFC3, PTGES3	SRC, PNKP
GO:1903047	mitotic cell cycle process	750	13	6.24	88	0.00826	0.01797	0.690323	1	A process that is part of the mitotic cell cycle	0.934386	-0.648863	PRKAR2B, PPP1CB, CUL5, DSCC1, MZT1, GIGYF2, ATF2, CEP126, KNL1, CCNG1, PHIP, ATM, CHAMP1, BACH1, EDN1, CDK1, DDX3X, DNA2, BIRC6, SKP2, NAA50, TOPBP1, FOXN3, CUL4B, CD2AP, AJUBA, NPAT, LRRCC1, ADAM17, NUP58, CDKN1B, CNOT8, KIF18A, PKD2, TOP2A, RINT1, YWHAG, RB1, VPS4B, CCP110, PPP1R12A, ANLN, CDC27, RAD21, CCNE2, ARPP19, BORA, ANKRD17, VRK1, FBXW11, ITGB3BP, CEP70, KHDRBS1, STAG2, MIS18BP1, ZFP36L…	AURKC, LZTS1, CDK11A, WASL, FLNA, MRNIP, FSD1, ID2, FBXL15, RTEL1, CARM1, ABRAXAS2, WDR62, PLK3, ALMS1, SIN3A, INCENP, CLSPN, NEDD1, XPC
GO:0000921	septin ring assembly	1	1	0.01	22	0.00832	0.00832	0.690323	1	The aggregation, arrangement and bonding together of septins and associated proteins to form an organized structure resembling a ring at the cell cortex	0.534914	0.534914	ANLN
GO:0002038	positive regulation of L-glutamate trans...	1	1	0.01	23	0.00832	0.00832	0.690323	1	Any process that activates or increases the frequency, rate or extent of L-glutamate transport	0.479222	0.479222	ARL6IP1
GO:0002041	intussusceptive angiogenesis	1	1	0.01	24	0.00832	0.00832	0.690323	1	The formation of new blood vessels as a result of the insertion and extension of lumenal tissue pillars	0.455384	0.455384	CYR61
GO:0003017	lymph circulation	1	1	0.01	25	0.00832	0.00832	0.690323	1	The flow of lymph through the body of an animal	0.564332	0.564332	HEG1
GO:0007403	glial cell fate determination	1	1	0.01	26	0.00832	0.00832	0.690323	1	The cell fate determination process in which a cell becomes capable of differentiating autonomously into a glial cell regardless of its environment; upon determination, the cell fate cannot be reversed	0.563538	0.563538	CTNNB1
GO:0021684	cerebellar granular layer formation	1	1	0.01	2090	0.00832	1	0.690323	1	The process that gives rise to the cerebellar granule layer. This process pertains to the initial formation of a structure from unspecified parts. The granular layer is the innermost layer of the cerebellar cortex. This layer contains densely packed small neurons, mostly granule cells. Some Golgi cells are found at the outer border. Granule neurons send parallel fibers to the upper molecular laye…	0.578614	0.578614	MTPN
GO:0021707	cerebellar granule cell differentiation	1	1	0.01	27	0.00832	0.00832	0.690323	1	The process in which neuroblasts acquire specialized structural and/or functional features that characterize the mature cerebellar granule cell. Differentiation includes the processes involved in commitment of a neuroblast to a granule cell fate. A granule cell is a glutamatergic interneuron found in the cerebellar cortex	0.578614	0.578614	MTPN
GO:0031104	dendrite regeneration	1	1	0.01	28	0.00832	0.00832	0.690323	1	The regrowth of dendrites in response to their loss or damage	0.39737	0.39737
GO:0031106	septin ring organization	1	1	0.01	2091	0.00832	1	0.690323	1	Control of the formation, spatial distribution, and breakdown of the septin ring	0.534914	0.534914	ANLN
GO:0032185	septin cytoskeleton organization	1	1	0.01	2092	0.00832	1	0.690323	1	A process that is carried out at the cellular level which results in the assembly, arrangement of constituent parts, or disassembly of cytoskeletal structures comprising septin complexes and their associated proteins	0.534914	0.534914	ANLN
GO:0035801	adrenal cortex development	1	1	0.01	2093	0.00832	1	0.690323	1	The process whose specific outcome is the progression of the adrenal cortex over time, from its formation to the mature structure. The adrenal cortex is located at the periphery of the adrenal gland and controls glucose and electrolyte metabolism, response to stress and sexual development through the production of different classes of steroid hormones (glucocorticoids, mineralocorticoids and andr…	0.394993	0.394993
GO:0035802	adrenal cortex formation	1	1	0.01	29	0.00832	0.00832	0.690323	1	The process that gives rise to the adrenal cortex. This process pertains to the initial formation of a structure from unspecified parts. The adrenogonadal primordium from which the adrenal cortex is formed derives from a condensation of coelomic epithelial cells (the urogenital ridge; the same structure from which gonads and kidney also originate)	0.394993	0.394993
GO:0044336	canonical Wnt signaling pathway involved...	1	1	0.01	30	0.00832	0.00832	0.690323	1	The series of molecular signals initiated by binding of a Wnt protein to a frizzled family receptor on the surface of the target cell, followed by propagation of the signal via beta-catenin, and ending with a change in transcription of target genes involved in the negative regulation of apoptotic process	0.563538	0.563538	CTNNB1
GO:0045870	positive regulation of single stranded v...	1	1	0.01	31	0.00832	0.00832	0.690323	1	Any process that activates or increases the frequency, rate or extent of retroviral genome replication	0.576001	0.576001	TOP2A
GO:0045976	negative regulation of mitotic cell cycl...	1	1	0.01	32	0.00832	0.00832	0.690323	1	Any process that stops, prevents or reduces the rate or extent of progression through the embryonic mitotic cell cycle	0.563538	0.563538	CTNNB1
GO:0060066	oviduct development	1	1	0.01	33	0.00832	0.00832	0.690323	1	The reproductive developmental process whose specific outcome is the progression of an oviduct over time, from its formation to the mature structure. An oviduct is a tube through which an ova passes from the ovary to the uterus, or from the ovary to the outside of the organism	0.563538	0.563538	CTNNB1
GO:0060423	foregut regionalization	1	1	0.01	2094	0.00832	1	0.690323	1	The pattern specification process that results in the spatial subdivision of an axis or axes along the foregut to define an area or volume in which specific patterns of cell differentiation will take place	0.563538	0.563538	CTNNB1
GO:0060424	lung field specification	1	1	0.01	2095	0.00832	1	0.690323	1	The process that results in the delineation of a specific region of the foregut into the area in which the lung will develop	0.563538	0.563538	CTNNB1
GO:0060492	lung induction	1	1	0.01	34	0.00832	0.00832	0.690323	1	The close range interaction of two or more cells or tissues that causes the cells of the foregut to change their fates and specify the development of the lung	0.563538	0.563538	CTNNB1
GO:0061324	canonical Wnt signaling pathway involved...	1	1	0.01	35	0.00832	0.00832	0.690323	1	The canonical Wnt signaling pathway that contributes to the modulation of the expansion of a population of cardiac outflow tract cells	0.563538	0.563538	CTNNB1
GO:0071962	mitotic sister chromatid cohesion, centr...	1	1	0.01	36	0.00832	0.00832	0.690323	1	The cell cycle process in which centromeres of sister chromatids are joined during mitosis	0.650576	0.650576	NAA50
GO:0072053	renal inner medulla development	1	1	0.01	37	0.00832	0.00832	0.690323	1	The process whose specific outcome is the progression of the renal inner medulla over time, from its formation to the mature structure. The renal inner medulla is unique to mammalian kidneys and is the innermost region of the mammalian kidney	0.563538	0.563538	CTNNB1
GO:0072054	renal outer medulla development	1	1	0.01	38	0.00832	0.00832	0.690323	1	The process whose specific outcome is the progression of the renal outer medulla over time, from its formation to the mature structure. The renal outer medulla is the region of the kidney that lies between the renal cortex and the renal inner medulla	0.563538	0.563538	CTNNB1
GO:0090271	positive regulation of fibroblast growth...	1	1	0.01	39	0.00832	0.00832	0.690323	1	Any process that increases the rate, frequency or extent of the appearance of a fibroblast growth factor due to biosynthesis or secretion following a cellular stimulus, resulting in an increase in its intracellular or extracellular levels	0.564332	0.564332	HEG1
GO:1902959	regulation of aspartic-type endopeptidas...	1	1	0.01	2096	0.00832	1	0.690323	1	Any process that modulates the frequency, rate or extent of aspartic-type endopeptidase activity involved in amyloid precursor protein catabolic process	0.595412	0.595412	PICALM
GO:1902961	positive regulation of aspartic-type end...	1	1	0.01	40	0.00832	0.00832	0.690323	1	Any process that activates or increases the frequency, rate or extent of aspartic-type endopeptidase activity involved in amyloid precursor protein catabolic process	0.595412	0.595412	PICALM
GO:1902962	regulation of metalloendopeptidase activ...	1	1	0.01	2097	0.00832	1	0.690323	1	Any process that modulates the frequency, rate or extent of metalloendopeptidase activity involved in amyloid precursor protein catabolic process	0.595412	0.595412	PICALM
GO:1902963	negative regulation of metalloendopeptid...	1	1	0.01	41	0.00832	0.00832	0.690323	1	Any process that stops, prevents or reduces the frequency, rate or extent of metalloendopeptidase activity involved in amyloid precursor protein catabolic process	0.595412	0.595412	PICALM
GO:1903636	regulation of protein import into mitoch...	1	1	0.01	2098	0.00832	1	0.690323	1		0.38667	0.38667
GO:1903638	positive regulation of protein import in...	1	1	0.01	42	0.00832	0.00832	0.690323	1		0.38667	0.38667
GO:1903645	negative regulation of chaperone-mediate...	1	1	0.01	43	0.00832	0.00832	0.690323	1		0.38667	0.38667
GO:1904499	regulation of chromatin-mediated mainten...	1	1	0.01	2099	0.00832	1	0.690323	1		0.563538	0.563538	CTNNB1
GO:1904501	positive regulation of chromatin-mediate...	1	1	0.01	44	0.00832	0.00832	0.690323	1		0.563538	0.563538	CTNNB1
GO:1904793	regulation of euchromatin binding	1	1	0.01	45	0.00832	0.00832	0.690323	1		0.563538	0.563538	CTNNB1
GO:1905245	regulation of aspartic-type peptidase ac...	1	1	0.01	2100	0.00832	1	0.690323	1		0.595412	0.595412	PICALM
GO:1905247	positive regulation of aspartic-type pep...	1	1	0.01	2101	0.00832	1	0.690323	1		0.595412	0.595412	PICALM
GO:1990809	endoplasmic reticulum tubular network me...	1	1	0.01	46	0.00832	0.00832	0.690323	1		0.479222	0.479222	ARL6IP1
GO:0003209	cardiac atrium morphogenesis	17	2	0.14	47	0.00856	0.00856	0.690323	1	The process in which the cardiac atrium is generated and organized. A cardiac atrium receives blood from a vein and pumps it to a cardiac ventricle	0.277699	-0.131207	HEG1, SOX4, CYR61, WNT5A
GO:0003382	epithelial cell morphogenesis	17	2	0.14	2102	0.00856	1	0.690323	1	The change in form that occurs when an epithelial cell progresses from its initial formation to its mature state	0.333073	-0.146313	CLIC4, HEG1, ROCK1	COL18A1
GO:0009648	photoperiodism	17	2	0.14	2103	0.00856	1	0.690323	1	Any process that results in a change in state or activity of an organism (in terms of movement, secretion, enzyme production, gene expression, etc.) as a result of detection of, or exposure to, a period of light or dark of a given length, measured relative to a particular duration known as the 'critical day length'. The critical day length varies between species	0.407746	-0.272315	PPP1CB, CLOCK, FBXL3, PPP1CC	CRTC1, ID2, MTA1
GO:0039694	viral RNA genome replication	17	2	0.14	536	0.00856	0.12362	0.690323	1	The replication of a viral RNA genome	0.22127	-0.179855	RAB5A, TOP2A, ROCK2
GO:0039703	RNA replication	17	2	0.14	537	0.00856	0.12362	0.690323	1	The cellular metabolic process in which a cell duplicates one or more molecules of RNA	0.22127	-0.179855	RAB5A, TOP2A, ROCK2
GO:0070987	error-free translesion synthesis	17	2	0.14	48	0.00856	0.00856	0.690323	1	The conversion of DNA-damage induced single-stranded gaps into large molecular weight DNA after replication by using a specialized DNA polymerase or replication complex to insert a defined nucleotide across the lesion. This process does not remove the replication-blocking lesions but does not causes an increase in the endogenous mutation level. For S. cerevisiae, RAD30 encodes DNA polymerase eta,…	0.24835	0.0190146	RFC3, RPA3
GO:2000243	positive regulation of reproductive proc...	17	2	0.14	49	0.00856	0.00856	0.690323	1	Any process that activates or increases the frequency, rate or extent of reproductive process	0.314651	-0.00870773	CTNNB1, MSX2, WNT5A
GO:0043154	negative regulation of cysteine-type end...	51	3	0.42	50	0.00864	0.00864	0.6912	1	Any process that stops, prevents, or reduces the frequency, rate or extent of a cysteine-type endopeptidase activity involved in the apoptotic process	0.555622	-0.303392	RPS6KA3, KLF4, DDX3X, TNFAIP8, FNIP1, ARL6IP1, SH3RF1, PRDX3	SRC, GAS6, POR
GO:0034654	nucleobase-containing compound biosynthe...	2642	32	21.98	404	0.00875	0.08988	0.694444	1	The chemical reactions and pathways resulting in the formation of nucleobases, nucleosides, nucleotides and nucleic acids	1.14458	-1.24117	UFL1, LIN9, IL1RAP, SMAD5, PRKAA1, PKN2, ASCC3, ATAD2B, GDF6, DDX20, STRN3, UBE2D2, WWTR1, DCK, TGFBR1, DSCC1, GTF2H2, KLF5, NMD3, CLOCK, ZRANB2, HOXA3, XPO1, CDK5R1, ATF2, ASH1L, NUDT21, ZNF618, NEK7, UGDH, RPS6KA3, FUBP3, EID1, RMI1, GJA1, TDG, PHIP, MAP3K2, MED13, PHF6, SKIL, NUFIP1, ELAVL2, TNKS2, PRKAR1A, HMGN5, ATM, FOSL2, ARMCX3, CAND1, RNF6, LGR4, SLC26A2, RARB, LEMD3, BACH1, CTDSPL2, MYB…	HTRA1, SPP1, FZD5, HOXB9, HMOX1, LTB4R2, MIER3, LZTS1, CDK11A, DYRK1B, ZNF41, ZNF17, ZNF512B, PIF1, CRTC1, CHCHD10, ZNF777, ZNF219, ZBTB7A, ZNF480, WASL, ZNF85, ZNF446, RIOX1, ZNF16, EFEMP1, MAP3K10, RNF2, MAP3K9, ZBTB45, E2F8, ISL2, ZNF213, CBFA2T2, FLNA, ARID4B, MNT, MED26, ZNF414, MZF1, PTCH1, NRF1, YAP1, ZNF142, ZNF329, ZNF200, AC138696.1, ZNF669, ZNF567, HOXB6, SMAD1, FOXO6, SRC, MED25, ID2,…
GO:0016071	mRNA metabolic process	590	11	4.91	1383	0.00908	0.44111	0.714961	1	The chemical reactions and pathways involving mRNA, messenger RNA, which is responsible for carrying the coded genetic 'message', transcribed from DNA, to sites of protein assembly at the ribosomes	0.908503	-0.519669	DDX20, PRPF39, MBNL2, QKI, GTF2H2, ZRANB2, PRPF38B, NUDT21, ELAVL2, ATM, PSIP1, LSM5, HIF1A, HNRNPA3, CNOT8, C5AR1, PTBP2, RPL21, THOC7, DDX6, PNN, AGO2, CELF1, WTAP, POLR3K, ZNF326, RNGTT, SRSF1, YTHDC1, PNRC2, KHDRBS1, DYRK1A, BAG4, ZFP36L2, CWC15, RNF20, TOB1, PPP4R2, MAGOHB, PAN3, RNPC3, TSEN2, TSEN15, LSM11, PAPOLA, GTF2F2, CDC73, SNRPE, SFPQ, POLR2K, RPS3A, CWC27, RPS25, RBM22, NSRP1, PTBP3…	CDK11A, MTREX, FLNA, AC009690.3, SRPK3, PRPF40B, DHX34, HIPK3, WDR33
GO:0051297	centrosome organization	99	4	0.82	51	0.00916	0.00916	0.715625	1	A process that is carried out at the cellular level which results in the assembly, arrangement of constituent parts, or disassembly of a centrosome, a structure comprised of a pair of centrioles and peri-centriolar material from which a microtubule spindle apparatus is organized	0.671245	-0.336854	XPO1, SASS6, CHORDC1, CDK1, SLC16A1, USP33, PCLAF, PKD2, CTNNB1, VPS4B, CCP110, PPP1R12A, GEN1, ROCK2, PDCD6IP, BRCA1, CHMP2B, CETN3, RANBP1	WDR62, PARD6A, BRSK1
GO:0051493	regulation of cytoskeleton organization	286	7	2.38	307	0.00943	0.06826	0.717164	1	Any process that modulates the frequency, rate or extent of the formation, arrangement of constituent parts, or disassembly of cytoskeletal structures	0.899491	-0.540162	SLAIN2, PHLDB2, TGFBR1, CLIC4, ARPC1B, XPO1, CDK5R1, ARHGAP18, ARF6, GMFB, CHORDC1, EDN1, SSH2, RICTOR, CD2AP, ARPC5, CDKN1B, KIF18A, MTPN, MYPN, CTNNB1, VPS4B, ROCK1, CAPZA1, PTK2, ARFIP1, BORA, FCHSD2, BAG4, PRKCE, FER, GEN1, ROCK2, SMAD3, PDCD6IP, SMAD4, BRCA1, CHMP2B, RANBP1, ABI2, SKA1	STMN3, CORO1A, WASL, CLIP3, TMOD1, ARHGDIA, ALMS1, FHOD3, ARAP1
GO:0010628	positive regulation of gene expression	1032	16	8.59	245	0.00955	0.05601	0.717164	1	Any process that increases the frequency, rate or extent of gene expression. Gene expression is the process in which a gene's coding sequence is converted into a mature gene product or products (proteins or RNA). This includes the production of an RNA transcript as well as any processing to produce a mature RNA product or an mRNA (for protein-coding genes) and the translation of that mRNA into pr…	1.03941	-0.921329	SMAD5, SERP1, PRKAA1, ATAD2B, GDF6, WWTR1, QKI, TGFBR1, KLF5, CLOCK, UHMK1, ATF2, ASH1L, RPS6KA3, FUBP3, TMED2, PHIP, MAP3K2, RBMS3, MED13, NUFIP1, HMGN5, FOSL2, ARMCX3, CAND1, RNF6, LGR4, RARB, BACH1, MYBL1, TAF1A, FLI1, EDN1, KLF4, PRDM2, CDK1, NR1D2, ATXN7, ZFHX3, DDX3X, KAT6A, CHD1, DEK, RBPJ, FOXN3, DLX1, CDK8, NFIB, CCNC, TRIM24, HIF1A, REST, NPAT, CHD6, RIOK2, PICALM, PKD2, TBL1XR1, ASF1A,…	SPP1, FZD5, HOXB9, DYRK1B, CSF1, CRTC1, ACTA2, E2F8, ARID4B, MZF1, PTCH1, NRF1, YAP1, ZNF567, SMAD1, SRC, MED25, ID2, ZEB1, AMH, GAS6, ZKSCAN3, BRF1, CARM1, JUNB, TFEB, AXIN1, KMT2B, IKBKG, CEBPD, MYO6, MEIS3, PIAS2, DBP, SIN3A, FLT3LG, CD34, DHX34, AGRN, MED16, SOX12, SCX, ZBTB7B, SUPT3H, ZFP90, GLI2, GLIS2, EPC1, TCEA2
GO:0003230	cardiac atrium development	18	2	0.15	2104	0.00958	1	0.717164	1	The process whose specific outcome is the progression of a cardiac atrium over time, from its formation to the mature structure. A cardiac atrium receives blood from a vein and pumps it to a cardiac ventricle	0.301339	-0.131207	HEG1, SOX4, CYR61, WNT5A
GO:0007063	regulation of sister chromatid cohesion	18	2	0.15	52	0.00958	0.00958	0.717164	1	Any process that modulates the frequency, rate or extent of sister chromatid cohesion	0.333036	-0.00638979	CTNNB1, RB1, RAD21, SFPQ
GO:0045948	positive regulation of translational ini...	18	2	0.15	53	0.00958	0.00958	0.717164	1	Any process that activates or increases the frequency, rate or extent of translational initiation	0.342387	-0.0379354	UHMK1, DDX3X, KHDRBS1
GO:0045446	endothelial cell differentiation	53	3	0.44	1112	0.00961	0.30708	0.717164	1	The process in which a mesodermal, bone marrow or neural crest cell acquires specialized features of an endothelial cell, a thin flattened cell. A layer of such cells lines the inside surfaces of body cavities, blood vessels, and lymph vessels, making up the endothelium	0.521505	-0.396043	CLIC4, RBPJ, HEG1, CTNNB1, ROCK1, ROCK2, SMAD4	LAMA5, ZEB1, COL18A1
GO:2000117	negative regulation of cysteine-type end...	54	3	0.45	2105	0.01011	1	0.748889	1	Any process that stops, prevents, or reduces the frequency, rate or extent of cysteine-type endopeptidase activity	0.555622	-0.303392	RPS6KA3, KLF4, DDX3X, TNFAIP8, FNIP1, ARL6IP1, SH3RF1, PRDX3	SRC, GAS6, POR
GO:0016032	viral process	685	12	5.7	1458	0.01034	0.48604	0.758451	1	A multi-organism process in which a virus is a participant. The other participant is the host. Includes infection of a host cell, replication of the viral genome, and assembly of progeny virus particles. In some cases the viral genetic material may integrate into the host genome and only subsequently, under particular circumstances, 'complete' its life cycle	0.847569	-0.805611	PKN2, CUL5, TRAM1, XPO1, BNIP3L, ELMOD2, RAB5A, KPNA3, CREBZF, POLR3G, DDX3X, PSIP1, MORC3, CHD1, DEK, REST, NUP58, KPNA1, SIRT1, TOP2A, RPL21, AP1S2, RB1, VPS4B, THOC7, TAF1, DDX6, ATF7IP, EFNB2, AP1S3, EIF4G3, YTHDC2, POLR3K, IPO7, UBP1, RNGTT, CHUK, ANKRD17, ITGAV, PRMT6, DYRK1A, TOP1, URI1, ROCK2, TAF4, SMAD3, KAT2B, PDCD6IP, GTF2F2, CHMP2B, NUP160, CD55, POLR2K, GBP1, RPS3A, RANBP1, CD46, AB…	HTRA1, NECTIN1, CRTC1, ACTA2, TYRO3, ITGB3, LRSAM1, SRC, GAS6, KLC1, CARM1, GBF1, IKBKG, VRK2, SIN3A, RBCK1, PARD6A, ISG15
GO:0044764	multi-organism cellular process	687	12	5.72	1463	0.01057	0.48994	0.758451	1	Any process that is carried out at the cellular level which involves another organism of the same or different species	0.847569	-0.805611	PKN2, CUL5, TRAM1, XPO1, BNIP3L, ELMOD2, RAB5A, KPNA3, CREBZF, POLR3G, DDX3X, PSIP1, MORC3, CHD1, DEK, REST, NUP58, KPNA1, SIRT1, TOP2A, RPL21, AP1S2, RB1, VPS4B, THOC7, TAF1, DDX6, ATF7IP, EFNB2, AP1S3, EIF4G3, YTHDC2, POLR3K, IPO7, UBP1, RNGTT, CHUK, ANKRD17, ITGAV, PRMT6, DYRK1A, TOP1, URI1, ROCK2, TAF4, SMAD3, KAT2B, PDCD6IP, GTF2F2, CHMP2B, NUP160, CD55, POLR2K, GBP1, RPS3A, RANBP1, CD46, AB…	HTRA1, NECTIN1, CRTC1, ACTA2, TYRO3, ITGB3, LRSAM1, SRC, GAS6, KLC1, CARM1, GBF1, IKBKG, VRK2, SIN3A, RBCK1, PARD6A, ISG15
GO:0051704	multi-organism process	1232	18	10.25	898	0.01063	0.22977	0.758451	1	A biological process which involves another organism of the same or different species	1.03288	-1.18639	SMAD5, PKN2, AGFG1, CUL5, DDX20, SPIN4, ADAM9, QKI, TGFBR1, ERAP1, CLIC4, PARP11, CLOCK, TRAM1, XPO1, BNIP3L, ELMOD2, UBE2J1, KNL1, ASH1L, RPS6KA3, GJA1, TMED2, SKIL, ATM, ACOX1, LGR4, RAB5A, CCNI, KPNA3, CADM1, CREBZF, EDN1, DUSP10, CDK1, TUBD1, POLR3G, DDX3X, PSIP1, MORC3, FNDC3A, CHD1, DEK, RBPJ, CPS1, REST, ADAM17, NUP58, ACSL4, KPNA1, DSG2, CD24, SIRT1, TFPI, TOP2A, C5AR1, RPL21, AP1S2, CTNN…	HTRA1, SPP1, IGFBP7, FZD5, AURKC, NECTIN1, IGFBP2, CRTC1, WASL, ACTA2, TNFRSF25, RNF2, TYRO3, MGST1, ARID4B, ITGB3, GGNBP1, IL17RC, TRIM36, LRSAM1, AC138696.1, SMAD1, SRC, AMH, GAS6, KLC1, CARM1, SPHK2, TESK1, JUNB, IL6R, GBF1, KMT2B, IKBKG, VRK2, ZFP41, MTA1, SIN3A, TESK2, SBF1, RBCK1, PARD6A, ZNF35, STS, GNB1L, WDR33, ISG15
GO:0007064	mitotic sister chromatid cohesion	19	2	0.16	589	0.01065	0.13797	0.758451	1	The cell cycle process in which the sister chromatids of a replicated chromosome are joined along the entire length of the chromosome, from their formation in S phase through metaphase during a mitotic cell cycle. This cohesion cycle is critical for high fidelity chromosome transmission	0.369464	-0.0599762	DSCC1, NAA50, RB1
GO:0009649	entrainment of circadian clock	19	2	0.16	2106	0.01065	1	0.758451	1	The synchronization of a circadian rhythm to environmental time cues such as light	0.320124	-0.297506	PPP1CB, FBXL3, PPP1CC	CRTC1, ID2, MTA1
GO:0050657	nucleic acid transport	161	5	1.34	54	0.01077	0.01077	0.758451	1	The directed movement of nucleic acids, single or double-stranded polynucleotides involved in the storage, transmission and transfer of genetic information, into, out of or within a cell, or between cells, by means of some agent such as a transporter or pore	0.888599	-0.305736	NXT2, G3BP2, AGFG1, QKI, PARP11, NMD3, XPO1, HNRNPA3, NUP58, RIOK2, THOC7, SRSF1, PHAX, KHDRBS1, SENP2, MAGOHB, NUP160, RANBP1, IGF2BP3, KIF5C, NUP155, ABCE1	WDR33
GO:0050658	RNA transport	161	5	1.34	55	0.01077	0.01077	0.758451	1	The directed movement of RNA, ribonucleic acids, into, out of or within a cell, or between cells, by means of some agent such as a transporter or pore	0.888599	-0.305736	NXT2, G3BP2, AGFG1, QKI, PARP11, NMD3, XPO1, HNRNPA3, NUP58, RIOK2, THOC7, SRSF1, PHAX, KHDRBS1, SENP2, MAGOHB, NUP160, RANBP1, IGF2BP3, KIF5C, NUP155, ABCE1	WDR33
GO:0031023	microtubule organizing center organizati...	104	4	0.87	2107	0.01085	1	0.758741	1	A process that is carried out at the cellular level which results in the assembly, arrangement of constituent parts, or disassembly of a microtubule organizing center, a structure from which microtubules grow	0.671245	-0.336854	XPO1, SASS6, CHORDC1, CDK1, SLC16A1, USP33, PCLAF, PKD2, CTNNB1, VPS4B, CCP110, PPP1R12A, GEN1, ROCK2, PDCD6IP, BRCA1, CHMP2B, CETN3, RANBP1	WDR62, PARD6A, BRSK1
GO:0044772	mitotic cell cycle phase transition	444	9	3.69	56	0.01095	0.01095	0.760417	1	The cell cycle process by which a cell commits to entering the next mitotic cell cycle phase	0.835798	-0.508821	PRKAR2B, PPP1CB, CUL5, GIGYF2, ATM, BACH1, CDK1, DDX3X, SKP2, TOPBP1, FOXN3, CUL4B, AJUBA, NPAT, ADAM17, CDKN1B, CNOT8, PKD2, RINT1, YWHAG, RB1, VPS4B, CCP110, PPP1R12A, ANLN, CDC27, RAD21, CCNE2, ARPP19, BORA, ANKRD17, FBXW11, CEP70, KHDRBS1, ZFP36L2, SOX4, CDKN2B, SENP2, NBN, GEN1, OFD1, RPA3, CDC7, LSM11, PPP6C, CDC73, NDC80, RANBP1, ZPR1, CNOT6	LZTS1, MRNIP, ID2, FBXL15, CARM1, PLK3, ALMS1, SIN3A, CLSPN, NEDD1, XPC
GO:0019438	aromatic compound biosynthetic process	2683	32	22.32	475	0.01114	0.10467	0.765068	1	The chemical reactions and pathways resulting in the formation of aromatic compounds, any substance containing an aromatic carbon ring	1.14458	-1.24117	UFL1, LIN9, IL1RAP, SMAD5, PRKAA1, PKN2, ASCC3, ATAD2B, GDF6, DDX20, STRN3, UBE2D2, WWTR1, DCK, TGFBR1, DSCC1, GTF2H2, KLF5, NMD3, CLOCK, ZRANB2, HOXA3, XPO1, CDK5R1, ATF2, ASH1L, NUDT21, ZNF618, NEK7, UGDH, RPS6KA3, FUBP3, EID1, RMI1, GJA1, TDG, PHIP, MAP3K2, MED13, PHF6, SKIL, NUFIP1, ELAVL2, TNKS2, PRKAR1A, HMGN5, ATM, FOSL2, ARMCX3, CAND1, RNF6, LGR4, SLC26A2, RARB, LEMD3, BACH1, CTDSPL2, MYB…	HTRA1, SPP1, FZD5, HOXB9, HMOX1, LTB4R2, MIER3, LZTS1, CDK11A, DYRK1B, ZNF41, ZNF17, ZNF512B, PIF1, CRTC1, CHCHD10, ZNF777, ZNF219, ZBTB7A, ZNF480, WASL, ZNF85, ZNF446, RIOX1, ZNF16, EFEMP1, MAP3K10, RNF2, MAP3K9, ZBTB45, E2F8, ISL2, ZNF213, CBFA2T2, FLNA, ARID4B, MNT, MED26, ZNF414, MZF1, PTCH1, IBA57, NRF1, YAP1, ZNF142, ZNF329, ZNF200, AC138696.1, ZNF669, ZNF567, HOXB6, SMAD1, FOXO6, SRC, MED2…
GO:0042752	regulation of circadian rhythm	56	3	0.47	1039	0.01117	0.2784	0.765068	1	Any process that modulates the frequency, rate or extent of a circadian rhythm. A circadian rhythm is a biological process in an organism that recurs with a regularity of approximately 24 hours	0.719694	-0.364155	PRKAA1, PPP1CB, FBXL3, NR1D2, ZFHX3, PPP1CC, TOP2A, OPN3, FBXW11, ROCK2, SFPQ	CRTC1, ID2, MTA1, SIN3A
GO:0051236	establishment of RNA localization	163	5	1.36	57	0.01132	0.01132	0.770068	1	The directed movement of RNA to a specific location	0.904169	-0.305736	NXT2, G3BP2, AGFG1, QKI, PARP11, NMD3, XPO1, ATM, HNRNPA3, NUP58, RIOK2, THOC7, SRSF1, PHAX, KHDRBS1, SENP2, MAGOHB, NUP160, RANBP1, IGF2BP3, KIF5C, NUP155, ABCE1	WDR33
GO:0043933	macromolecular complex subunit organizat...	1337	19	11.12	580	0.01141	0.13291	0.770946	1	Any process in which macromolecules aggregate, disaggregate, or are modified, resulting in the formation, disassembly, or alteration of a macromolecular complex	1.06302	-1.19173	IL1RAP, SLAIN2, G3BP2, PRKAA1, DDX20, PRPF39, CENPQ, COBLL1, TGFBR1, GTF2H2, ARPC1B, MZT1, DNAAF4, KNL1, NUDT21, NAP1L3, ARHGAP18, ANP32E, GJA1, TMED2, ARF6, MRPS18C, NUFIP1, ATM, KIF5B, CAND1, GMFB, TMEM33, DNAJC6, KPNA3, CDK1, DDX3X, KCTD9, PSIP1, KAT6A, DNAAF2, TBCA, LOX, PDGFC, CUL4B, RICTOR, CD2AP, MARCKS, ARPC5, P4HA1, COL3A1, AJUBA, NUP58, FNIP1, CDKN1B, KIF18A, PICALM, STXBP3, BET1, IMMP1…	CRYAB, PANX2, FZD5, CNIH2, HMOX1, GRWD1, STMN3, CORO1A, EHD3, CRTC1, PILRB, COL6A2, WASL, ABCA7, RRP7BP, PLTP, MGST1, SEC24B, YAP1, SMAD1, COL1A2, SRC, CLIP3, MED25, SRPK3, KLC1, TMOD1, BRF1, AXIN1, TRAPPC9, AMER1, COL11A1, RABGGTA, FHOD3, AC005670.2, NDUFS7, CTNNBIP1, STX1B, SOX12, KCTD11, SCX, XPC, ME1
GO:0018130	heterocycle biosynthetic process	2689	32	22.37	482	0.01153	0.10697	0.773826	1	The chemical reactions and pathways resulting in the formation of heterocyclic compounds, those with a cyclic molecular structure and at least two different atoms in the ring (or rings)	1.14458	-1.24117	UFL1, LIN9, IL1RAP, SMAD5, PRKAA1, PKN2, ASCC3, ATAD2B, GDF6, DDX20, STRN3, UBE2D2, WWTR1, DCK, TGFBR1, DSCC1, GTF2H2, KLF5, NMD3, CLOCK, ZRANB2, HOXA3, XPO1, CDK5R1, ATF2, ASH1L, NUDT21, ZNF618, NEK7, UGDH, RPS6KA3, FUBP3, EID1, RMI1, GJA1, TDG, PHIP, MAP3K2, MED13, PHF6, SKIL, NUFIP1, ELAVL2, TNKS2, PRKAR1A, HMGN5, ATM, FOSL2, ARMCX3, CAND1, RNF6, LGR4, SLC26A2, RARB, LEMD3, BACH1, CTDSPL2, MYB…	HTRA1, SPP1, FZD5, HOXB9, HMOX1, LTB4R2, MIER3, LZTS1, CDK11A, DYRK1B, ZNF41, ZNF17, ZNF512B, PIF1, CRTC1, CHCHD10, ZNF777, ZNF219, ZBTB7A, ZNF480, WASL, ZNF85, ZNF446, RIOX1, ZNF16, EFEMP1, MAP3K10, RNF2, MAP3K9, PLTP, ZBTB45, E2F8, ISL2, ZNF213, CBFA2T2, FLNA, ARID4B, MNT, MED26, ZNF414, MZF1, PTCH1, IBA57, NRF1, YAP1, ZNF142, ZNF329, ZNF200, AC138696.1, ZNF669, ZNF567, HOXB6, SMAD1, FOXO6, SRC…
GO:0006297	nucleotide-excision repair, DNA gap fill...	20	2	0.17	58	0.01177	0.01177	0.784667	1	Repair of the gap in the DNA helix by DNA polymerase and DNA ligase after the portion of the strand containing the lesion has been removed by pyrimidine-dimer repair enzymes	0.294564	-0.0980578	POLK, RFC3, POLD3, RPA3
GO:0009891	positive regulation of biosynthetic proc...	1057	16	8.79	702	0.0119	0.17251	0.788079	1	Any process that activates or increases the frequency, rate or extent of the chemical reactions and pathways resulting in the formation of substances	1.03973	-0.947925	SMAD5, SERP1, PRKAA1, ATAD2B, GDF6, WWTR1, TGFBR1, DSCC1, KLF5, NMD3, CLOCK, UHMK1, ATF2, ASH1L, NEK7, RPS6KA3, FUBP3, PHIP, MAP3K2, RBMS3, MED13, NUFIP1, TNKS2, HMGN5, ATM, FOSL2, ARMCX3, CAND1, RNF6, LGR4, RARB, BACH1, MYBL1, FLI1, EDN1, KLF4, PRDM2, CDK1, NR1D2, ATXN7, ZFHX3, DDX3X, DNA2, KAT6A, CHD1, RBPJ, FOXN3, PDGFC, DLX1, CDK8, NFIB, CCNC, TRIM24, HIF1A, REST, AJUBA, NPAT, CHD6, PICALM, P…	SPP1, FZD5, HOXB9, HMOX1, DYRK1B, CRTC1, PTH1R, E2F8, ARID4B, MZF1, PTCH1, NRF1, YAP1, ZNF567, SMAD1, SRC, MED25, ID2, ZEB1, ZKSCAN3, BRF1, CARM1, JUNB, TFEB, AXIN1, KMT2B, IKBKG, CEBPD, MYO6, PNKP, MEIS3, PIAS2, DBP, SIN3A, FLT3LG, AGRN, MED16, SOX12, SCX, ZBTB7B, SUPT3H, ZFP90, GLI2, GLIS2, EPC1, TCEA2, POR
GO:0003231	cardiac ventricle development	59	3	0.49	2108	0.01287	1	0.84026	1	The process whose specific outcome is the progression of a cardiac ventricle over time, from its formation to the mature structure. A cardiac ventricle receives blood from a cardiac atrium and pumps it out of the heart	0.541781	-0.361753	TGFBR1, RBPJ, HIF1A, HEG1, SOX4, CYR61, SMAD4, TBX3, WNT5A	ID2, COL11A1
GO:0032728	positive regulation of interferon-beta p...	21	2	0.17	59	0.01294	0.01294	0.84026	1	Any process that activates or increases the frequency, rate, or extent of interferon-beta production	0.371145	-0.0521703	POLR3G, DDX3X
GO:0051693	actin filament capping	21	2	0.17	2109	0.01294	1	0.84026	1	The binding of a protein or protein complex to the end of an actin filament, thus preventing the addition, exchange or removal of further actin subunits	0.243074	-0.161459	MTPN, CAPZA1	TMOD1
GO:0044770	cell cycle phase transition	460	9	3.83	60	0.01358	0.01358	0.849744	1	The cell cycle process by which a cell commits to entering the next cell cycle phase	0.835798	-0.52991	PRKAR2B, PPP1CB, CUL5, GIGYF2, ATM, BACH1, CDK1, DDX3X, SKP2, TOPBP1, FOXN3, CUL4B, AJUBA, NPAT, ADAM17, CDKN1B, CNOT8, PKD2, RINT1, YWHAG, RB1, VPS4B, CCP110, TAF1, PPP1R12A, ANLN, CDC27, RAD21, CCNE2, ARPP19, BORA, ANKRD17, FBXW11, CEP70, KHDRBS1, ZFP36L2, SOX4, CDKN2B, SENP2, NBN, GEN1, OFD1, RPA3, CDC7, LSM11, PPP6C, CDC73, NDC80, RANBP1, ZPR1, CNOT6	LZTS1, ZNF16, MRNIP, ID2, FBXL15, CARM1, PLK3, ALMS1, SIN3A, CLSPN, NEDD1, XPC
GO:0007163	establishment or maintenance of cell pol...	112	4	0.93	61	0.01394	0.01394	0.849744	1	Any cellular process that results in the specification, formation or maintenance of anisotropic intracellular organization or cell growth patterns	0.611903	-0.39974	CLIC4, ARF6, RICTOR, PARVA, ARPC5, ROCK1, PRKCI, PTK2, ROCK2, RAB10, PDCD6IP, NDC80, CTNNA1, SPDL1, WNT5A	DLG3, GBF1, FBF1, BRSK1
GO:0045667	regulation of osteoblast differentiation	61	3	0.51	2110	0.01408	1	0.849744	1	Any process that modulates the frequency, rate or extent of osteoblast differentiation	0.556642	-0.515956	SMAD5, CTNNB1, MSX2, SNAI2, PTK2, SUCO, TOB1, SMAD3, CYR61, SKI, RUNX2	TRPM4, RIOX1, PTCH1, SMAD1, ID2, IL6R, CEBPD, PIAS2, CTNNBIP1
GO:0044085	cellular component biogenesis	1973	25	16.41	474	0.01416	0.10431	0.849744	1	A process that results in the biosynthesis of constituent macromolecules, assembly, and arrangement of constituent parts of a cellular component. Includes biosynthesis of constituent macromolecules, and those macromolecular modifications that are involved in synthesis or assembly of the cellular component	1.11887	-1.22772	PRKAR2B, IL1RAP, SLAIN2, G3BP2, PRKAA1, PKN2, AGFG1, DDX20, PRPF39, CENPQ, WWTR1, PHLDB2, COBLL1, TGFBR1, GTF2H2, KLF5, NMD3, ARPC1B, XPO1, MZT1, SRGAP2C, PEX11A, STAM, DNAAF4, CEP126, KNL1, NUDT21, NAP1L3, NEK7, POC1B, ARHGAP18, GJA1, ERI2, TMED2, ARF6, NUFIP1, SASS6, PRKAR1A, DNER, CDH2, ATM, CAND1, GMFB, TMEM33, SACS, RAB5A, KPNA3, EEF2K, C1D, EDN1, ICK, CDK1, SSH2, DDX3X, KCTD9, DNA2, PTPDC1,…	CRYAB, PANX2, FZD5, CNIH2, HMOX1, AURKC, GRWD1, ITGB4, NECTIN1, CORO1A, EHD3, CRTC1, PILRB, COL6A2, WASL, SLX4, ABCA7, RRP7BP, PLXNB3, MTREX, MGST1, MYO7B, SEC24B, FLNA, ADAMTS16, LAMA5, ITGB3, IBA57, YAP1, LRRC24, LRSAM1, EMG1, SMAD1, COL1A2, SRC, TMEM175, CLIP3, MED25, ATG2A, PLEC, GAS6, SRPK3, TMOD1, BRF1, RTEL1, ABRAXAS2, AXIN1, WDR62, TBL3, FBF1, TRAPPC9, PEX16, GPC1, GNL3L, AMER1, ALMS1, RA…
GO:0009880	embryonic pattern specification	22	2	0.18	63	0.01416	0.01416	0.849744	1	The process that results in the patterns of cell differentiation that will arise in an embryo	0.497269	-0.376976	SMAD5, TMED2, CTNNB1, SMAD3, SMAD4, TBX3, WNT5A	FZD5, EFNB1, PTCH1, SMAD1
GO:0000731	DNA synthesis involved in DNA repair	62	3	0.52	1054	0.01471	0.28442	0.849744	1	Synthesis of DNA that proceeds from the broken 3' single-strand DNA end uses the homologous intact duplex as the template	0.60076	-0.271245	RMI1, ATM, DNA2, PCLAF, SIRT1, BRIP1, POLK, RFC3, REV1, NBN, POLD3, RPA3, BRCA1	USP43, ISG15
GO:0003158	endothelium development	62	3	0.52	1221	0.01471	0.35625	0.849744	1	The process whose specific outcome is the progression of an endothelium over time, from its formation to the mature structure. Endothelium refers to the layer of cells lining blood vessels, lymphatics, the heart, and serous cavities, and is derived from bone marrow or mesoderm. Corneal endothelium is a special case, derived from neural crest cells	0.568185	-0.410064	CLIC4, GJA1, RBPJ, HEG1, CTNNB1, ROCK1, ROCK2, SMAD4	LAMA5, ZEB1, COL18A1, CD34
GO:0000070	mitotic sister chromatid segregation	115	4	0.96	303	0.01523	0.06687	0.849744	1	The cell cycle process in which replicated homologous chromosomes are organized and then physically separated and apportioned to two sets during the mitotic cell cycle. Each replicated chromosome, composed of two sister chromatids, aligns at the cell equator, paired with its homologous partner. One homolog of each morphologic type goes into each of the resulting chromosome sets	0.633098	-0.318277	DSCC1, ATM, CHAMP1, NAA50, KIF18A, RB1, VPS4B, CDC27, RAD21, GEN1, RACGAP1, CHMP2B, NDC80, SPDL1, BECN1	AURKC
GO:0010942	positive regulation of cell death	391	8	3.25	921	0.01548	0.23963	0.849744	1	Any process that increases the rate or frequency of cell death. Cell death is the specific activation or halting of processes within a cell so that its vital functions markedly cease, rather than simply deteriorating gradually over time, which culminates in cell death	0.819146	-0.730423	DDX20, TGFBR1, BNIP3L, CDK5R1, ATF2, SKIL, ATM, RARB, CARD8, DDX3X, EEF1E1, TNFAIP8, REST, FNIP1, CDKN1B, PICALM, SIRT1, TOP2A, CTNNB1, YWHAG, CYP1B1, ZC3H8, SENP1, NET1, PRKCI, MSX2, SUDS3, DNAJA1, EIF2AK3, ITGB3BP, SOX4, ARL6IP5, SMAD3, CYR61, EIF2S1, TRAF6, MAP3K20, ITGA6, FOXO3, SFPQ, CTNNA1, SIAH1, TIAM1, F2R, WNT5A, STK3	OSGIN1, HMOX1, PLEKHG5, ADAMTSL4, PLEKHF1, MAP3K10, MAP3K9, CD274, SRC, CLIP3, COL18A1, NQO1, RBCK1
GO:0006405	RNA export from nucleus	117	4	0.97	65	0.01614	0.01614	0.849744	1	The directed movement of RNA from the nucleus to the cytoplasm	0.660621	-0.294974	AGFG1, NMD3, XPO1, NUP58, RIOK2, THOC7, SRSF1, PHAX, KHDRBS1, MAGOHB, NUP160, RANBP1, NUP155, ABCE1	WDR33
GO:0001880	Mullerian duct regression	2	1	0.02	66	0.01657	0.01657	0.849744	1	The process in which the Mullerian ducts, primordia of the oviducts, uterus and upper vagina, undergo regression in male embryos	0.323441	0.323441	SMAD5	AMH
GO:0002036	regulation of L-glutamate transport	2	1	0.02	2111	0.01657	1	0.849744	1	Any process that modulates the frequency, rate or extent of L-glutamate transport	0.469292	0.469292	ARL6IP1, ARL6IP5
GO:0003278	apoptotic process involved in heart morp...	2	1	0.02	67	0.01657	0.01657	0.849744	1	Any apoptotic process that contributes to the shaping of the heart	0.368065	0.368065	CYR61
GO:0003340	negative regulation of mesenchymal to ep...	2	1	0.02	68	0.01657	0.01657	0.849744	1	Any process that decreases the rate, frequency or extent of the transition where a mesenchymal cell establishes apical/basolateral polarity,forms intercellular adhesive junctions, synthesizes basement membrane components and becomes an epithelial cell that will contribute to the shaping of the metanephros	0.485728	0.485728	CTNNB1, STAT1
GO:0009794	regulation of mitotic cell cycle, embryo...	2	1	0.02	2112	0.01657	1	0.849744	1	Any process that modulates the frequency, rate or extent of replication and segregation of genetic material in the embryo	0.0868059	0.0868059	CTNNB1
GO:0014045	establishment of endothelial blood-brain...	2	1	0.02	69	0.01657	0.01657	0.849744	1	Establishment of the endothelial barrier between the blood and the brain. The endothelial cells in the brain capillaries are packed tightly together preventing the passage of most molecules from the blood into the brain. Only lipid soluble molecules or those that are actively transported can pass through the blood-brain barrier	0.13954	0.13954	CTNNB1
GO:0022009	central nervous system vasculogenesis	2	1	0.02	70	0.01657	0.01657	0.849744	1	The differentiation of endothelial cells from progenitor cells during blood vessel development, and the de novo formation of blood vessels and tubes in the central nervous system. The capillary endothelial cells in the brain are specialized to form the blood-brain barrier	0.13954	0.13954	CTNNB1
GO:0030997	regulation of centriole-centriole cohesi...	2	1	0.02	71	0.01657	0.01657	0.849744	1	Any process that modulates the extent to which the two centrioles within a centrosome remain tightly paired; may be mediated by the assembly and disassembly of a proteinaceous linker	0.439884	0.439884	CTNNB1
GO:0032472	Golgi calcium ion transport	2	1	0.02	72	0.01657	0.01657	0.849744	1	The directed movement of calcium ions (Ca2+) into, out of or within the Golgi apparatus	0.00275042	0.00275042	TMEM165	ATP2C1
GO:0036022	limb joint morphogenesis	2	1	0.02	73	0.01657	0.01657	0.849744	1	The process in which the anatomical structures of a limb joint are generated and organized. A limb joint is a flexible region that separates the rigid sections of a limb to allow movement in a controlled manner	0.267179	0.267179	CTNNB1
GO:0036023	embryonic skeletal limb joint morphogene...	2	1	0.02	74	0.01657	0.01657	0.849744	1	The process, occurring in the embryo, in which the anatomical structures of a skeletal limb joint are generated and organized. A skeletal limb joint is the connecting structure between the bones of a limb	0.267179	0.267179	CTNNB1
GO:0038107	nodal signaling pathway involved in dete...	2	1	0.02	75	0.01657	0.01657	0.849744	1	A series of molecular signals initiated by the binding of a nodal protein to an activin receptor on the surface of a target cell, which contributes to the establishment of an organism's body plan or part of an organism with respect to the left and right halves	0.113122	0.113122
GO:0044334	canonical Wnt signaling pathway involved...	2	1	0.02	76	0.01657	0.01657	0.849744	1	The series of molecular signals initiated by binding of a Wnt protein to a frizzled family receptor on the surface of the target cell, followed by propagation of the signal via beta-catenin, and ending with a change in transcription of target genes involved in the positive regulation of epithelial cell to mesenchymal cell transition	0.414942	0.414942	CTNNB1
GO:0045448	mitotic cell cycle, embryonic	2	1	0.02	2113	0.01657	1	0.849744	1	The eukaryotic cell cycle in which a cell is duplicated without changing ploidy, occurring in the embryo	0.0868059	0.0868059	CTNNB1
GO:0051957	positive regulation of amino acid transp...	2	1	0.02	2114	0.01657	1	0.849744	1	Any process that activates, maintains or increases the frequency, rate or extent of the directed movement of amino acids into, out of or within a cell, or between cells, by means of some agent such as a transporter or pore	0.305255	0.305255	ARL6IP1
GO:0060769	positive regulation of epithelial cell p...	2	1	0.02	77	0.01657	0.01657	0.849744	1	Any process that increases the rate, frequency or extent of epithelial cell proliferation that contributes to the progression of the prostate gland over time	0.222457	0.222457	CTNNB1
GO:0061047	positive regulation of branching involve...	2	1	0.02	2115	0.01657	1	0.849744	1	Any process that modulates the rate, frequency, or extent of the process in which a highly ordered sequence of patterning events generates the branched structures of the lung, consisting of reiterated combinations of bud outgrowth, elongation, and dichotomous subdivision of terminal units	0.0975755	0.0975755	CTNNB1
GO:0070602	regulation of centromeric sister chromat...	2	1	0.02	78	0.01657	0.01657	0.849744	1	Any process that modulates the frequency, rate or extent of sister chromatid cohesion in the centromeric region of a chromosome	0.318217	0.318217	CTNNB1
GO:0071460	cellular response to cell-matrix adhesio...	2	1	0.02	79	0.01657	0.01657	0.849744	1	Any process that results in a change in state or activity of a cell (in terms of movement, secretion, enzyme production, gene expression, etc.) as a result of cell-matrix adhesion	0.2297	0.2297	SKP2
GO:0071651	positive regulation of chemokine (C-C mo...	2	1	0.02	80	0.01657	0.01657	0.849744	1	Any process that activates or increases the frequency, rate, or extent of production of chemokine (C-C motif) ligand 5	0.415577	0.415577	DDX3X
GO:0090158	endoplasmic reticulum membrane organizat...	2	1	0.02	2116	0.01657	1	0.849744	1	A process that is carried out at the cellular level which results in the assembly, arrangement of constituent parts, or disassembly of an endoplasmic reticulum membrane	0.341843	0.341843	ARL6IP1
GO:1900094	regulation of transcription from RNA pol...	2	1	0.02	81	0.01657	0.01657	0.849744	1	Any regulation of transcription from RNA polymerase II promoter that is involved in determination of left/right symmetry	0.113122	0.113122
GO:1900164	nodal signaling pathway involved in dete...	2	1	0.02	82	0.01657	0.01657	0.849744	1	A series of molecular signals initiated by the binding of a nodal protein to an activin receptor on the surface of a target cell, which contributes to the establishment of lateral mesoderm with respect to the left and right halves	0.113122	0.113122
GO:1901963	regulation of cell proliferation involve...	2	1	0.02	2117	0.01657	1	0.849744	1	Any process that modulates the frequency, rate or extent of cell proliferation involved in outflow tract morphogenesis	0.0975755	0.0975755	CTNNB1
GO:1903644	regulation of chaperone-mediated protein...	2	1	0.02	2118	0.01657	1	0.849744	1		0.0685935	0.0685935
GO:1904684	negative regulation of metalloendopeptid...	2	1	0.02	2119	0.01657	1	0.849744	1		0.397477	0.397477	PICALM
GO:1904954	canonical Wnt signaling pathway involved...	2	1	0.02	83	0.01657	0.01657	0.849744	1		0.337786	0.337786	CTNNB1
GO:1990791	dorsal root ganglion development	2	1	0.02	84	0.01657	0.01657	0.849744	1		0.168543	0.168543	CTNNB1
GO:2000017	positive regulation of determination of ...	2	1	0.02	85	0.01657	0.01657	0.849744	1	Any process that activates or increases the frequency, rate or extent of determination of dorsal identity	0.219383	0.219383	CTNNB1
GO:2000697	negative regulation of epithelial cell d...	2	1	0.02	86	0.01657	0.01657	0.849744	1	Any process that stops, prevents or reduces the frequency, rate or extent of epithelial cell differentiation involved in kidney development	0.485728	0.485728	CTNNB1, STAT1
GO:2001045	negative regulation of integrin-mediated...	2	1	0.02	87	0.01657	0.01657	0.849744	1	Any process that stops, prevents or reduces the frequency, rate or extent of integrin-mediated signaling pathway	0.135288	0.135288	CTNNA1
GO:0030835	negative regulation of actin filament de...	24	2	0.2	2120	0.01674	1	0.854082	1	Any process that stops, prevents, or reduces the frequency, rate or extent of actin depolymerization	0.258215	-0.161992	MTPN, CAPZA1	TMOD1
GO:1901362	organic cyclic compound biosynthetic pro...	2757	32	22.94	584	0.01684	0.13539	0.854822	1	The chemical reactions and pathways resulting in the formation of organic cyclic compound	1.14653	-1.28025	UFL1, LIN9, IL1RAP, SMAD5, PRKAA1, PKN2, ASCC3, ATAD2B, ACBD3, GDF6, DDX20, STRN3, UBE2D2, WWTR1, DCK, TGFBR1, DSCC1, GTF2H2, KLF5, NMD3, CLOCK, ZRANB2, HOXA3, XPO1, CDK5R1, ATF2, ASH1L, NUDT21, ZNF618, NEK7, UGDH, RPS6KA3, FUBP3, EID1, RMI1, GJA1, TDG, PHIP, MAP3K2, MED13, PHF6, SKIL, NUFIP1, ELAVL2, TNKS2, PRKAR1A, HMGN5, ATM, FOSL2, ARMCX3, CAND1, RNF6, LGR4, SLC26A2, RARB, LEMD3, BACH1, CTDSP…	HTRA1, SPP1, IGFBP7, FZD5, HOXB9, HMOX1, LTB4R2, MIER3, LZTS1, CDK11A, DYRK1B, ZNF41, ZNF17, ZNF512B, PIF1, CRTC1, CHCHD10, ZNF777, ZNF219, ZBTB7A, ZNF480, WASL, ZNF85, ZNF446, RIOX1, ZNF16, EFEMP1, MAP3K10, RNF2, MAP3K9, PLTP, ZBTB45, E2F8, ISL2, ZNF213, CBFA2T2, FLNA, ARID4B, MNT, MED26, ZNF414, MZF1, PTCH1, IBA57, NRF1, YAP1, ZNF142, ZNF329, ZNF200, AC138696.1, ZNF669, ZNF567, HOXB6, SMAD1, FO…
GO:0007346	regulation of mitotic cell cycle	401	8	3.34	209	0.01776	0.045	0.89697	1	Any process that modulates the rate or extent of progress through the mitotic cell cycle	0.789674	-0.530034	PKN2, GIGYF2, ATF2, NEK7, PHIP, ATM, EDN1, CDK1, DDX3X, TOPBP1, FOXN3, CDK8, CUL4B, ADAM17, CDKN1B, CNOT8, PKD2, SIRT1, TOP2A, RINT1, CTNNB1, RB1, VPS4B, ANLN, CDC27, RAD21, BORA, ANKRD17, ZFP36L2, SOX4, CDKN2B, SENP2, NBN, GEN1, RPA3, SMAD3, CDC7, LSM11, CDC73, CHMP2B, NDC80, RANBP1, TOP2B, CNOT6, DYNLT3, BECN1	CDK11A, PTCH1, TMEM8B, MRNIP, ID2, CARM1, GBF1, PLK3, SIN3A, CLSPN, XPC
GO:0098609	cell-cell adhesion	325	7	2.7	89	0.01803	0.01803	0.905	1	The attachment of one cell to another cell via adhesion molecules	0.81933	-0.650033	DENND6A, ADAM9, CLDN12, CDK5R1, PRKAR1A, CDH2, ITGA4, CADM1, KLF4, DUSP10, FNDC3A, DSC2, RICTOR, PARVA, CD2AP, AJUBA, DSG2, STXBP3, CD24, SOCS5, CTNNB1, GCNT1, CYP1B1, ROCK1, ZC3H8, EFNB2, CTNND1, SNAI2, YES1, MAP3K7, PTK2, CLDN11, CDH12, ITGAV, CD47, PRKG1, FER, GLMN, RAB10, CYR61, TRAF6, NRXN3, CD58, ITGA6, CD55, CDH3, CTNNA1, CD46, PDLIM5, CNN3, WNT5A	NECTIN1, CORO1A, SLC7A11, IGFBP2, EFNB1, TYRO3, PLXNB3, FLNA, ITGB3, CD274, SRC, ZEB1, GAS6, ATP2C1, LAG3, HLX, CD83, CD34, ICAM3, ZBTB7B, SCARF2, GLI2
GO:0006283	transcription-coupled nucleotide-excisio...	67	3	0.56	90	0.0181	0.0181	0.905	1	The nucleotide-excision repair process that carries out preferential repair of DNA lesions on the actively transcribed strand of the DNA duplex. In addition, the transcription-coupled nucleotide-excision repair pathway is required for the recognition and repair of a small subset of lesions that are not recognized by the global genome nucleotide excision repair pathway	0.519208	-0.244119	GTF2H2, CUL4B, POLK, RFC3, POLD3, RPA3, POLR2K
GO:0001819	positive regulation of cytokine producti...	184	5	1.53	2121	0.01829	1	0.90995	1	Any process that activates or increases the frequency, rate or extent of production of a cytokine	0.715625	-0.588176	IL1RAP, ATF2, CADM1, CARD8, POLR3G, DDX3X, HIF1A, ADAM17, C5AR1, HEG1, CTNNB1, CYP1B1, POLR3K, TBC1D23, MAP3K7, CHUK, ANKRD17, EIF2AK3, GLMN, SMAD3, TRAF6, CD58, BRCA1, GPRC5B, POLR2K, CD46, F2R, TRIM32, WNT5A	FZD5, HMOX1, CD274, IL17RC, SRC, IL6R, CD83, CD34
GO:0043241	protein complex disassembly	185	5	1.54	661	0.01868	0.15907	0.923153	1	The disaggregation of a protein complex into its constituent components. Protein complexes may have other associated non-protein prosthetic groups, such as nucleic acids, metal ions or carbohydrate groups	0.586998	-0.494934	MRPS18C, DNAJC6, KIF18A, MTPN, CTNNB1, MRPL33, VPS4B, CAPZA1, PTCD3, MRPL30, MRPL35, CHMP2B, NAPB, MRPL47, ABCE1	FZD5, STMN3, TMOD1, AXIN1, AMER1
GO:0043254	regulation of protein complex assembly	254	6	2.11	561	0.01874	0.12834	0.923153	1	Any process that modulates the frequency, rate or extent of protein complex assembly	0.802441	-0.849545	SLAIN2, GTF2H2, ARPC1B, ARHGAP18, ARF6, CAND1, GMFB, DDX3X, CUL4B, RICTOR, ARPC5, AJUBA, FNIP1, CDKN1B, MTPN, CTNNB1, TAF1, ATF7IP, CAPZA1, ARFIP1, FCHSD2, BAG4, PRKCE, FER, ZNF451, RPA3, GTF2F2, RALB, ABI2	CRYAB, CORO1A, WASL, SRC, CLIP3, MED25, TMOD1, FHOD3, CTNNBIP1, STX1B
GO:0006913	nucleocytoplasmic transport	328	7	2.73	91	0.01886	0.01886	0.923507	1	The directed movement of molecules between the nucleus and the cytoplasm	0.937281	-0.424207	G3BP2, AGFG1, DDX20, WWTR1, TGFBR1, NMD3, XPO1, UHMK1, KPNA3, CTDSPL2, CDK1, PPP1CC, NUP58, KPNA1, RIOK2, PKD2, SIRT1, HEATR3, CTNNB1, THOC7, PPP1R12A, IPO7, SNAI2, SRSF1, FBXW11, PHAX, KHDRBS1, SOX4, TOB1, MAGOHB, SMAD3, SMAD4, NUP160, SNRPE, PBLD, RANBP1, RBM22, NSRP1, F2R, ZPR1, STRADB, NUP155, ABCE1	FLNA, GAS6, TONSL, RBCK1, WDR33
GO:0009611	response to wounding	331	7	2.75	92	0.01973	0.01973	0.923507	1	Any process that results in a change in state or activity of a cell or an organism (in terms of movement, secretion, enzyme production, gene expression, etc.) as a result of a stimulus indicating damage to the organism	0.817366	-0.860175	PRKAR2B, PHLDB2, TGFBR1, GJA1, PRKAR1A, RAB5A, EDN1, KLF4, CDK1, LOX, PDGFC, HIF1A, COL3A1, AJUBA, ADAM17, STXBP3, EPHA4, MTPN, TFPI, FGF2, MSX2, SLC1A3, CAPZA1, H3F3A, DGKH, HPS5, ZFP36L2, PRKCE, PRKG1, SMAD3, CYR61, CDH3, CTNNA1, BPTF, AKAP1, F2R, WNT5A, TENT5A	SPP1, HMOX1, ITGB4, EHD3, SLC7A11, TYRO3, FLNA, ITGB3, COL1A2, SRC, GAS6, ADAM15, DGKZ, CD34
GO:0045935	positive regulation of nucleobase-contai...	1024	15	8.52	699	0.01974	0.1703	0.923507	1	Any cellular process that activates or increases the frequency, rate or extent of the chemical reactions and pathways involving nucleobases, nucleosides, nucleotides and nucleic acids	1.01497	-0.905881	SMAD5, PRKAA1, ATAD2B, GDF6, WWTR1, TGFBR1, DSCC1, KLF5, NMD3, CLOCK, ATF2, ASH1L, NEK7, RPS6KA3, FUBP3, PHIP, MAP3K2, MED13, NUFIP1, TNKS2, HMGN5, ATM, FOSL2, ARMCX3, CAND1, RNF6, LGR4, RARB, BACH1, MYBL1, FLI1, EDN1, KLF4, PRDM2, CDK1, NR1D2, ATXN7, ZFHX3, DDX3X, DNA2, KAT6A, CHD1, RBPJ, FOXN3, PDGFC, DLX1, CDK8, NFIB, CCNC, TRIM24, HIF1A, REST, NPAT, CHD6, CNOT8, RIOK2, PICALM, PKD2, TBL1XR1, …	SPP1, FZD5, HOXB9, DYRK1B, CRTC1, SLX4, E2F8, ARID4B, MZF1, PTCH1, NRF1, YAP1, MRNIP, ZNF567, SMAD1, SRC, MED25, ID2, ZEB1, ZKSCAN3, BRF1, RTEL1, CARM1, JUNB, TFEB, AXIN1, KMT2B, IKBKG, CEBPD, MYO6, PNKP, MEIS3, PIAS2, DBP, TMEM161A, SIN3A, FLT3LG, AGRN, MED16, SOX12, SCX, ZBTB7B, SUPT3H, ZFP90, GLI2, GLIS2, EPC1, TCEA2
GO:0015931	nucleobase-containing compound transport	188	5	1.56	93	0.01988	0.01988	0.923507	1	The directed movement of nucleobases, nucleosides, nucleotides and nucleic acids, into, out of or within a cell, or between cells, by means of some agent such as a transporter or pore	0.955775	-0.344131	NXT2, G3BP2, AGFG1, SLC25A24, QKI, PARP11, NMD3, XPO1, GJA1, SLC25A32, SLC35A3, HNRNPA3, NUP58, RIOK2, THOC7, SRSF1, PHAX, KHDRBS1, SENP2, MAGOHB, SLC35A1, NUP160, SLC35B4, RANBP1, IGF2BP3, KIF5C, NUP155, ABCE1	WDR33
GO:0051169	nuclear transport	335	7	2.79	95	0.02092	0.02092	0.923507	1	The directed movement of substances into, out of, or within the nucleus	0.937281	-0.424207	G3BP2, AGFG1, DDX20, WWTR1, TGFBR1, NMD3, XPO1, UHMK1, KPNA3, CTDSPL2, CDK1, PSIP1, PPP1CC, NUP58, KPNA1, RIOK2, PKD2, SIRT1, HEATR3, CTNNB1, THOC7, PPP1R12A, IPO7, SNAI2, SRSF1, FBXW11, PHAX, KHDRBS1, SOX4, TOB1, MAGOHB, SMAD3, SMAD4, NUP160, SNRPE, PBLD, RANBP1, RBM22, NSRP1, F2R, ZPR1, STRADB, NUP155, ABCE1	FLNA, GAS6, TONSL, RBCK1, WDR33
GO:0007131	reciprocal meiotic recombination	27	2	0.22	96	0.02095	0.02095	0.923507	1	The cell cycle process in which double strand breaks are formed and repaired through a double Holliday junction intermediate. This results in the equal exchange of genetic material between non-sister chromatids in a pair of homologous chromosomes. These reciprocal recombinant products ensure the proper segregation of homologous chromosomes during meiosis I and create genetic diversity	0.39937	-0.157004	ATM, TOP2A, BRIP1, RAD21, TOP2B	SLX4
GO:0035825	reciprocal DNA recombination	27	2	0.22	97	0.02095	0.02095	0.923507	1	A DNA recombination process that results in the equal exchange of genetic material between the recombining DNA molecules	0.39937	-0.157004	ATM, TOP2A, BRIP1, RAD21, TOP2B	SLX4
GO:0006403	RNA localization	192	5	1.6	100	0.02156	0.02156	0.923507	1	A process in which RNA is transported to, or maintained in, a specific location	0.904169	-0.305736	NXT2, G3BP2, AGFG1, QKI, PARP11, NMD3, XPO1, ATM, HNRNPA3, NUP58, RIOK2, THOC7, SRSF1, PHAX, KHDRBS1, SENP2, MAGOHB, NUP160, RANBP1, IGF2BP3, KIF5C, NUP155, ABCE1	WDR33
GO:0044033	multi-organism metabolic process	192	5	1.6	314	0.02156	0.07147	0.923507	1	A metabolic process - chemical reactions and pathways, including anabolism and catabolism, by which living organisms transform chemical substances - which involves more than one organism	0.555742	-0.290287	RAB5A, CHD1, REST, NUP58, TOP2A, RPL21, ROCK2, GTF2F2, NUP160, POLR2K, RPS3A, RPS25, TRIM32, CCNT2, NUP155, NUCKS1
GO:0045070	positive regulation of viral genome repl...	28	2	0.23	799	0.02244	0.19973	0.923507	1	Any process that activates or increases the frequency, rate or extent of viral genome replication	0.436102	-0.133391	PKN2, DDX3X, TOP2A, YTHDC2, NUCKS1
GO:0007098	centrosome cycle	73	3	0.61	103	0.02268	0.02268	0.923507	1	The cell cycle process in which centrosome duplication and separation takes place. The centrosome cycle can operate with a considerable degree of independence from other processes of the cell cycle	0.643621	-0.286073	XPO1, SASS6, CHORDC1, CDK1, USP33, PKD2, CTNNB1, VPS4B, CCP110, GEN1, ROCK2, PDCD6IP, BRCA1, CHMP2B, CETN3, RANBP1	WDR62, BRSK1
GO:0007548	sex differentiation	130	4	1.08	2122	0.02282	1	0.923507	1	The establishment of the sex of an organism by physical differentiation	0.725438	-0.467273	SMAD5, TGFBR1, ATM, LGR4, FNDC3A, HMGCS1, KIF18A, SIRT1, CTNNB1, BRIP1, H3F3A, TAF4, KLHL26, ADAMTS1, SMAD4, FOXO3, CTNNA1, TBX3, WNT5A	TYRO3, MGST1, ARID4B, AMH, KMT2B, ADAM15, SCX
GO:0031328	positive regulation of cellular biosynth...	1044	15	8.69	983	0.02313	0.26416	0.923507	1	Any process that activates or increases the frequency, rate or extent of the chemical reactions and pathways resulting in the formation of substances, carried out by individual cells	1.01657	-0.947925	SMAD5, SERP1, ATAD2B, GDF6, WWTR1, TGFBR1, DSCC1, KLF5, NMD3, CLOCK, UHMK1, ATF2, ASH1L, NEK7, RPS6KA3, FUBP3, PHIP, MAP3K2, RBMS3, MED13, NUFIP1, TNKS2, HMGN5, ATM, FOSL2, ARMCX3, CAND1, RNF6, LGR4, RARB, BACH1, MYBL1, FLI1, EDN1, KLF4, PRDM2, CDK1, NR1D2, ATXN7, ZFHX3, DDX3X, DNA2, KAT6A, CHD1, RBPJ, FOXN3, PDGFC, DLX1, CDK8, NFIB, CCNC, TRIM24, HIF1A, REST, AJUBA, NPAT, CHD6, PICALM, PKD2, TBL…	SPP1, FZD5, HOXB9, HMOX1, DYRK1B, CRTC1, PTH1R, E2F8, ARID4B, MZF1, PTCH1, NRF1, YAP1, ZNF567, SMAD1, SRC, MED25, ID2, ZEB1, ZKSCAN3, BRF1, CARM1, JUNB, TFEB, AXIN1, KMT2B, IKBKG, CEBPD, MYO6, PNKP, MEIS3, PIAS2, DBP, SIN3A, FLT3LG, AGRN, MED16, SOX12, SCX, ZBTB7B, SUPT3H, ZFP90, GLI2, GLIS2, EPC1, TCEA2, POR
GO:0048514	blood vessel morphogenesis	268	6	2.23	306	0.0237	0.06772	0.923507	1	The process in which the anatomical structures of blood vessels are generated and organized. The blood vessel is the vasculature carrying blood	0.843752	-0.668112	QKI, TGFBR1, ERAP1, CLIC4, KLF5, HOXA3, CDH2, EDN1, KLF4, RBPJ, NUS1, LOX, PARVA, HIF1A, COL3A1, PKD2, SIRT1, C5AR1, FGF2, HEG1, CTNNB1, CYP1B1, ROCK1, EFNB2, UBP1, PTK2, EIF2AK3, ITGAV, SOX4, GLMN, ROCK2, CYR61, BRCA1, WNT5A, STAT1	FZD5, HMOX1, SLC12A6, E2F8, SEC24B, LAMA5, ITGB3, YAP1, COL18A1, JUNB, ADAM15, ENPP2, CD34, PRKX, SCG2
GO:0065003	macromolecular complex assembly	1144	16	9.52	947	0.02385	0.24975	0.923507	1	The aggregation, arrangement and bonding together of a set of macromolecules to form a complex	1.05676	-1.14125	IL1RAP, SLAIN2, G3BP2, PRKAA1, DDX20, PRPF39, CENPQ, COBLL1, GTF2H2, ARPC1B, MZT1, DNAAF4, KNL1, NUDT21, NAP1L3, ARHGAP18, GJA1, TMED2, ARF6, NUFIP1, ATM, CAND1, GMFB, TMEM33, KPNA3, CDK1, DDX3X, KCTD9, PSIP1, KAT6A, DNAAF2, TBCA, PDGFC, CUL4B, RICTOR, CD2AP, MARCKS, ARPC5, AJUBA, NUP58, FNIP1, CDKN1B, PICALM, STXBP3, BET1, IMMP1L, ATL2, MTPN, ASF1A, PTBP2, PIK3C2A, VBP1, CTNNB1, RB1, SOD2, TFAM,…	CRYAB, PANX2, CNIH2, HMOX1, GRWD1, CORO1A, EHD3, CRTC1, PILRB, COL6A2, WASL, ABCA7, RRP7BP, MGST1, SEC24B, YAP1, SMAD1, COL1A2, SRC, CLIP3, MED25, SRPK3, TMOD1, BRF1, AXIN1, TRAPPC9, AMER1, RABGGTA, FHOD3, AC005670.2, NDUFS7, CTNNBIP1, STX1B, SOX12, KCTD11, XPC, ME1
GO:0031102	neuron projection regeneration	29	2	0.24	819	0.02398	0.20632	0.923507	1	The regrowth of neuronal processes such as axons or dendrites in response to their loss or damage	0.360601	-0.431606	KLF4, EPHA4, CTNNA1	SPP1
GO:0048645	animal organ formation	29	2	0.24	820	0.02398	0.20632	0.923507	1	The process pertaining to the initial formation of an organ from unspecified parts. The process begins with the specific processes that contribute to the appearance of the discrete structure, such as inductive events, and ends when the structural rudiment of the organ is recognizable, such as a condensation of mesenchymal cells into the organ rudiment. Organs are a natural part or structure in an…	0.433052	-0.228763	HOXA3, RBPJ, CTNNB1, WNT5A	GLI2
GO:2000278	regulation of DNA biosynthetic process	75	3	0.62	1359	0.02434	0.43058	0.923507	1	Any process that modulates the frequency, rate or extent of DNA biosynthetic process	0.674556	-0.403189	DSCC1, NEK7, GJA1, TNKS2, ATM, KLF4, CTNNB1, RFC3, PTGES3	PIF1, SRC, GNL3L, PNKP
GO:0006396	RNA processing	771	12	6.41	1550	0.02435	0.55112	0.923507	1	Any process involved in the conversion of one or more primary RNA transcripts into one or more mature RNA molecules	0.932995	-0.606515	DDX20, PRPF39, MBNL2, QKI, GTF2H2, TRMT13, ZRANB2, PRPF38B, TRNT1, NUDT21, ERI2, NUFIP1, ELAVL2, C1D, PSIP1, INTS2, LSM5, ALKBH8, HNRNPA3, RIOK2, SIRT1, PTBP2, UTP23, RPL21, THOC7, PNN, AGO2, CELF1, WDR43, WTAP, YTHDC2, ZNF326, RNGTT, SRSF1, YTHDC1, KHDRBS1, DYRK1A, TRMT5, CWC15, RNF20, PPP4R2, MAGOHB, PAN3, RNPC3, TSEN2, SMAD3, OSGEP, TSEN15, LSM11, PAPOLA, GTF2F2, CDC73, SNRPE, SFPQ, POLR2K, RP…	CDK11A, LCMT2, WDR4, RRP7BP, MTREX, EMG1, SMAD1, AC009690.3, SRPK3, PRPF40B, DUS3L, WDR62, TBL3, KIAA0391, TRUB2, DHX34, ADAT3, PUSL1, DDX54, WDR33, CTU2
GO:0008283	cell proliferation	1051	15	8.74	313	0.02442	0.07097	0.923507	1	The multiplication or reproduction of cells, resulting in the expansion of a cell population	1.04311	-1.05528	UFL1, PRKAA1, ASCC3, CUL5, DDX20, WWTR1, TGFBR1, BCHE, KLF5, HOXA3, CDK5R1, ATF2, POC1B, GJA1, PHIP, PRKAR1A, HMGN5, CDH2, ATM, FOSL2, LGR4, RARB, HOOK3, EDN1, KLF4, CDK1, BMI1, POLR3G, MORC3, EEF1E1, TES, BIRC6, THAP12, SKP2, RBPJ, FIGNL1, C3orf58, PDGFC, RICTOR, NFIB, TRIM24, HIF1A, SGK3, REST, SUZ12, ADAM17, CDKN1B, CNOT8, PICALM, PKD2, TAX1BP3, CD24, SIRT1, RYK, C5AR1, FGF2, PTBP2, CTNNB1, BR…	HTRA1, IGFBP7, FZD5, HMOX1, DAGLA, MIA-RAB4B, CORO1A, CSF1, TRPM4, IGFBP2, PTH1R, TNFRSF25, ZNF16, EFNB1, PLXNB3, E2F8, FLNA, MNT, PTCH1, LAMA5, FTH1, ITGB3, CD274, YAP1, SMAD1, SRC, DLG3, MED25, ID2, ZEB1, GAS6, CARM1, COL18A1, SPHK2, JUNB, HLX, MXD4, IL6R, SPEG, BRICD5, FLT3LG, RASGRF1, CD34, GAS8, CTNNBIP1, PRKX, KCTD11, SCX, GLI2, SCG2, POR
GO:0048518	positive regulation of biological proces...	2941	33	24.47	1707	0.0245	0.68407	0.923507	1	Any process that activates or increases the frequency, rate or extent of a biological process. Biological processes are regulated by many means; examples include the control of gene expression, protein modification or interaction with a protein or substrate molecule	1.1637	-1.27859	UFL1, PRKAR2B, IL1RAP, SMAD5, SLAIN2, SERP1, PRKAA1, PKN2, DENND6A, SH3D19, ATAD2B, GDF6, DDX20, CENPQ, EDIL3, UBE2D2, WWTR1, DCUN1D4, PHLDB2, ADAM9, QKI, TGFBR1, DSCC1, ERAP1, GTF2H2, KLF5, NMD3, CLOCK, MAP3K1, HOXA3, ARPC1B, GOLT1B, SRGAP2C, POGLUT1, STAM, BNIP3L, UHMK1, CDK5R1, ATF2, ASH1L, SCOC, NEK7, RPS6KA3, FUBP3, FRMPD4, GJA1, TMED2, PHIP, ARF6, MAP3K2, RBMS3, MED13, MAP4K5, SKIL, NUFIP1,…	HTRA1, SPP1, OSGIN1, FZD5, HOXB9, HMOX1, AURKC, PLEKHG5, GPR68, DYRK1B, TNFRSF19, ADAMTSL4, SLC30A3, CORO1A, CSF1, EHD3, LAT2, TRPM4, IGFBP2, BOC, CRTC1, PILRB, PTH1R, WASL, SLX4, ACTA2, ZNF16, PLEKHF1, EFNB1, MAP3K10, ABCA7, MAP3K9, WDR24, PLTP, TYRO3, PLXNB3, E2F8, CBFA2T2, FLNA, ARID4B, MZF1, PTCH1, ITGB3, CD274, NRF1, YAP1, LRRC24, IL17RC, PRELID3A, LRSAM1, MRNIP, ZNF567, SMAD1, FOXO6, SRC, C…
GO:0003140	determination of left/right asymmetry in...	3	1	0.02	105	0.02475	0.02475	0.923507	1	The establishment of the lateral mesoderm with respect to the left and right halves	-0.00290664	-0.00290664
GO:0009629	response to gravity	3	1	0.02	106	0.02475	0.02475	0.923507	1	Any process that results in a change in state or activity of a cell or an organism (in terms of movement, secretion, enzyme production, gene expression, etc.) as a result of a gravitational stimulus	0.0659694	0.0659694
GO:0010908	regulation of heparan sulfate proteoglyc...	3	1	0.02	107	0.02475	0.02475	0.923507	1	Any process that modulates the rate, frequency or extent of heparan sulfate proteoglycan biosynthesis. Heparan sulfate proteoglycan biosynthetic processes are the chemical reactions and pathways resulting in the formation of the heparan sulfate proteoglycan, a glycosaminoglycan with repeat unit consisting of alternating alpha-(1->4)-linked hexuronic acid and glucosamine residues	0.297916	0.297916	CTNNB1
GO:0010909	positive regulation of heparan sulfate p...	3	1	0.02	108	0.02475	0.02475	0.923507	1	Any process that increases the rate, frequency or extent of heparan sulfate proteoglycan biosynthesis. Heparan sulfate proteoglycan biosynthetic processes are the chemical reactions and pathways resulting in the formation of the heparan sulfate proteoglycan, a glycosaminoglycan with repeat unit consisting of alternating alpha-(1->4)-linked hexuronic acid and glucosamine residues	0.297916	0.297916	CTNNB1
GO:0016188	synaptic vesicle maturation	3	1	0.02	109	0.02475	0.02475	0.923507	1	Steps required to form an initiated synaptic vesicle into a fully formed and transmissible synaptic vesicle	0.165787	0.165787	PICALM
GO:0018171	peptidyl-cysteine oxidation	3	1	0.02	110	0.02475	0.02475	0.923507	1	The oxidation of peptidyl-cysteine to peptidyl-L-cysteine sulfinic acid or peptidyl-L-cysteine sulfenic acid	0.255393	0.255393	PRDX3
GO:0021683	cerebellar granular layer morphogenesis	3	1	0.02	2123	0.02475	1	0.923507	1	The process in which the anatomical structure of the cerebellar granular layer is generated and organized. The granular layer is the innermost layer of the cerebellar cortex. This layer contains densely packed small neurons, mostly granule cells. Some Golgi cells are found at the outer border. Granule neurons send parallel fibers to the upper molecular layer, where they synapse with Purkinje cell…	0.333558	0.333558	MTPN
GO:0021781	glial cell fate commitment	3	1	0.02	2124	0.02475	1	0.923507	1	The process in which the developmental fate of a cell becomes restricted such that it will develop into a glial cell	0.305642	0.305642	CTNNB1
GO:0030263	apoptotic chromosome condensation	3	1	0.02	111	0.02475	0.02475	0.923507	1	The compaction of chromatin during apoptosis	0.271567	0.271567	TOP2A
GO:0032241	positive regulation of nucleobase-contai...	3	1	0.02	112	0.02475	0.02475	0.923507	1	Any process that activates or increases the frequency, rate or extent of the directed movement of nucleobases, nucleosides, nucleotides and nucleic acids, into, out of or within a cell, or between cells, by means of some agent such as a transporter or pore	0.489015	0.489015	RIOK2, KHDRBS1
GO:0033591	response to L-ascorbic acid	3	1	0.02	113	0.02475	0.02475	0.923507	1	Any process that results in a change in state or activity of a cell or an organism (in terms of movement, secretion, enzyme production, gene expression, etc.) as a result of an L-ascorbic acid (vitamin C) stimulus	-0.0236457	-0.0236457
GO:0034421	post-translational protein acetylation	3	1	0.02	114	0.02475	0.02475	0.923507	1	The addition of an acetyl group to one or more amino acids in a protein, occurring after the protein has been completely translated and released from the ribosome	0.502764	0.502764	DSCC1, ESCO2
GO:0035360	positive regulation of peroxisome prolif...	3	1	0.02	115	0.02475	0.02475	0.923507	1	Any process that activates or increases the frequency, rate or extent of the peroxisome proliferator activated receptor signaling pathway	-0.0064419	-0.0064419
GO:0042640	anagen	3	1	0.02	116	0.02475	0.02475	0.923507	1	The growth phase of the hair cycle. Lasts, for example, about 3 to 6 years for human scalp hair	0.397649	0.397649	CTNNB1, WNT5A
GO:0046604	positive regulation of mitotic centrosom...	3	1	0.02	117	0.02475	0.02475	0.923507	1	Any process that activates or increases the frequency, rate or extent of centrosome separation	0.109072	0.109072	RANBP1
GO:0046833	positive regulation of RNA export from n...	3	1	0.02	118	0.02475	0.02475	0.923507	1	Any process that activates or increases the frequency, rate or extent of directed movement of RNA from the nucleus into the cytoplasm	0.489015	0.489015	RIOK2, KHDRBS1
GO:0051884	regulation of timing of anagen	3	1	0.02	119	0.02475	0.02475	0.923507	1	Any process that modulates the frequency, rate or extent of anagen, the growth phase of the hair cycle	0.397649	0.397649	CTNNB1, WNT5A
GO:0060431	primary lung bud formation	3	1	0.02	2125	0.02475	1	0.923507	1	The morphogenetic process in which the foregut region specified to become the lung forms the initial left and right buds	0.243361	0.243361	CTNNB1
GO:0060484	lung-associated mesenchyme development	3	1	0.02	120	0.02475	0.02475	0.923507	1	The biological process whose specific outcome is the progression of a lung-associated mesenchyme from an initial condition to its mature state. This process begins with the formation of lung-associated mesenchyme and ends with the mature structure. Lung-associated mesenchyme is the tissue made up of loosely connected mesenchymal cells in the lung	0.105178	0.105178	CTNNB1
GO:0060591	chondroblast differentiation	3	1	0.02	121	0.02475	0.02475	0.923507	1	The process in which a mesenchymal cell, acquires specialized structural and/or functional features of a chondroblast. Differentiation includes the processes involved in commitment of a cell to a chondroblast fate. A chondroblast is a precursor cell to chondrocytes	0.275242	0.275242	FGF2, CYR61
GO:0060710	chorio-allantoic fusion	3	1	0.02	122	0.02475	0.02475	0.923507	1	The cell-cell adhesion process in which the cells of the chorion fuse to the cells of the allantois	0.24102	0.24102	CYR61
GO:0060916	mesenchymal cell proliferation involved ...	3	1	0.02	123	0.02475	0.02475	0.923507	1	The multiplication or reproduction of cells, resulting in the expansion of a mesenchymal cell population that contributes to the progression of the lung over time. A mesenchymal cell is a cell that normally gives rise to other cells that are organized as three-dimensional masses, rather than sheets	0.433279	0.433279	NFIB, CTNNB1
GO:0060971	embryonic heart tube left/right pattern ...	3	1	0.02	124	0.02475	0.02475	0.923507	1	The pattern specification process that results in the subdivision of the left/right axis of the embryonic heart tube in space to define an area or volume in which specific patterns of cell differentiation will take place	0.114934	0.114934
GO:0061046	regulation of branching involved in lung...	3	1	0.02	2126	0.02475	1	0.923507	1	Any process that modulates the rate, frequency, or extent of the process in which a highly ordered sequence of patterning events generates the branched structures of the lung, consisting of reiterated combinations of bud outgrowth, elongation, and dichotomous subdivision of terminal units	0.153402	0.153402	CTNNB1
GO:0061198	fungiform papilla formation	3	1	0.02	125	0.02475	0.02475	0.923507	1	The developmental process pertaining to the initial formation of a spongiform papilla from unspecified parts. The fungiform papilla is a mushroom-shaped papilla of the tongue	0.37956	0.37956	CTNNB1
GO:0061316	canonical Wnt signaling pathway involved...	3	1	0.02	2127	0.02475	1	0.923507	1	The series of molecular signals initiated by binding of a Wnt protein to a frizzled family receptor on the surface of the target cell, followed by propagation of the signal via beta-catenin, and ending with a change in transcription of target genes that contributes to the progression of the heart over time. In this pathway, the activated receptor signals via downstream effectors that result in th…	0.519627	0.519627	RBPJ, CTNNB1
GO:0061325	cell proliferation involved in outflow t...	3	1	0.02	2128	0.02475	1	0.923507	1	The multiplication or reproduction of cells, resulting in the expansion of a cell population that contributes to the shaping of the outflow tract	0.0509571	0.0509571	CTNNB1
GO:0061428	negative regulation of transcription fro...	3	1	0.02	126	0.02475	0.02475	0.923507	1	Any process that decreases the frequency, rate or extent of transcription from an RNA polymerase II promoter as a result of a hypoxia stimulus	0.0949429	0.0949429
GO:0071649	regulation of chemokine (C-C motif) liga...	3	1	0.02	127	0.02475	0.02475	0.923507	1	Any process that modulates the frequency, rate, or extent of production of chemokine (C-C motif) ligand 5	0.221984	0.221984	DDX3X
GO:0072033	renal vesicle formation	3	1	0.02	128	0.02475	0.02475	0.923507	1	The developmental process pertaining to the initial formation of the renal vesicle from condensed mesenchymal cells. The renal vesicle is the primordial structure of the nephron epithelium, and is formed by the condensation of mesenchymal cells	0.197876	0.197876	CTNNB1
GO:0072217	negative regulation of metanephros devel...	3	1	0.02	129	0.02475	0.02475	0.923507	1	Any process that decreases the rate, frequency or extent of metanephros development. Metanephros development is the process whose specific outcome is the progression of the metanephros over time, from its formation to the mature structure. The metanephros is an organ that filters the blood and excretes the end products of body metabolism in the form of urine	0.201023	0.201023	CTNNB1, STAT1
GO:0090269	fibroblast growth factor production	3	1	0.02	2129	0.02475	1	0.923507	1	The appearance of a fibroblast growth factor due to biosynthesis or secretion following a cellular stimulus, resulting in an increase in its intracellular or extracellular levels	0.178254	0.178254	HEG1
GO:0090270	regulation of fibroblast growth factor p...	3	1	0.02	2130	0.02475	1	0.923507	1	Any process that modulates the rate, frequency or extent of the appearance of a fibroblast growth factor due to biosynthesis or secretion following a cellular stimulus, resulting in an increase in its intracellular or extracellular levels	0.178254	0.178254	HEG1
GO:0090521	glomerular visceral epithelial cell migr...	3	1	0.02	130	0.02475	0.02475	0.923507	1	The orderly movement of a podocyte from one site to another, often during the development of a multicellular organism or multicellular structure. A podocyte is a specialized kidney epithelial cell	0.150072	0.150072	ANLN
GO:1902004	positive regulation of beta-amyloid form...	3	1	0.02	131	0.02475	0.02475	0.923507	1	Any process that activates or increases the frequency, rate or extent of beta-amyloid formation	0.145672	0.145672	PICALM
GO:1902730	positive regulation of proteoglycan bios...	3	1	0.02	132	0.02475	0.02475	0.923507	1	Any process that activates or increases the frequency, rate or extent of the chemical reactions and pathways resulting in the formation of proteoglycans, any glycoprotein in which the carbohydrate units are glycosaminoglycans	0.297916	0.297916	CTNNB1
GO:1902993	positive regulation of amyloid precursor...	3	1	0.02	133	0.02475	0.02475	0.923507	1	Any process that activates or increases the frequency, rate or extent of amyloid precursor protein catabolic process	0.145672	0.145672	PICALM
GO:1904683	regulation of metalloendopeptidase activ...	3	1	0.02	2131	0.02475	1	0.923507	1		0.219064	0.219064	PICALM
GO:1904798	positive regulation of core promoter bin...	3	1	0.02	134	0.02475	0.02475	0.923507	1		0.383065	0.383065	KLF4, CTNNB1
GO:1905941	positive regulation of gonad development	3	1	0.02	135	0.02475	0.02475	0.923507	1		0.197741	0.197741
GO:2000015	regulation of determination of dorsal id...	3	1	0.02	136	0.02475	0.02475	0.923507	1	Any process that modulates the frequency, rate or extent of determination of dorsal identity	0.159813	0.159813	CTNNB1
GO:2000018	regulation of male gonad development	3	1	0.02	137	0.02475	0.02475	0.923507	1	Any process that modulates the frequency, rate or extent of male gonad development	0.197741	0.197741
GO:2000020	positive regulation of male gonad develo...	3	1	0.02	138	0.02475	0.02475	0.923507	1	Any process that activates or increases the frequency, rate or extent of male gonad development	0.197741	0.197741
GO:2000286	receptor internalization involved in can...	3	1	0.02	139	0.02475	0.02475	0.923507	1	A receptor internalization process that contributes to canonical Wnt signaling pathway	0.418703	0.418703	RAB5A
GO:0031333	negative regulation of protein complex a...	76	3	0.63	1289	0.02519	0.39234	0.935897	1	Any process that stops, prevents, or reduces the frequency, rate or extent of protein complex assembly	0.437095	-0.719185	DDX3X, MTPN, CAPZA1, ZNF451	CRYAB, SRC, CLIP3, TMOD1, FHOD3, CTNNBIP1
GO:0006417	regulation of translation	272	6	2.26	647	0.02527	0.15041	0.935897	1	Any process that modulates the frequency, rate or extent of the chemical reactions and pathways resulting in the formation of proteins by the translation of mRNA	0.841338	-0.381803	SERP1, SECISBP2L, QKI, UHMK1, GIGYF2, RPS6KA3, RBMS3, SRP9, DDX3X, IREB2, AJUBA, CNOT8, MTPN, DDX6, AGO2, CELF1, EIF4G3, PTCD3, FXR1, EIF2AK3, KHDRBS1, ZFP36L2, SOX4, TOB1, SMAD3, EIF2S1, LARP4, FOXO3, TRMT10C, IGF2BP3, TNRC6B, PA2G4, CNOT6	SMAD1
GO:0007405	neuroblast proliferation	30	2	0.25	2132	0.02555	1	0.935897	1	The expansion of a neuroblast population by cell division. A neuroblast is any cell that will divide and give rise to a neuron	0.391276	-0.383686	HIF1A, CTNNB1, RACGAP1, RAB10, CTNNA1	DAGLA, KCTD11
GO:0008347	glial cell migration	30	2	0.25	140	0.02555	0.02555	0.935897	1	The orderly movement of a glial cell, non-neuronal cells that provide support and nutrition, maintain homeostasis, form myelin, and participate in signal transmission in the nervous system	0.471361	-0.297693	SRGAP2C, CDK5R1, EPHA4, CTNNB1, TIAM1	CSF1
GO:0072091	regulation of stem cell proliferation	30	2	0.25	2133	0.02555	1	0.935897	1	Any process that modulates the frequency, rate or extent of stem cell proliferation. A stem cell is a cell that retains the ability to divide and proliferate throughout life to provide progenitor cells that can differentiate into specialized cells	0.405432	-0.33084	HIF1A, CTNNB1, SNAI2, CTNNA1, TBX3	YAP1, KCTD11
GO:0000082	G1/S transition of mitotic cell cycle	202	5	1.68	143	0.02615	0.02615	0.95438	1	The mitotic cell cycle transition by which a cell in G1 commits to S phase. The process begins with the build up of G1 cyclin-dependent kinase (G1 CDK), resulting in the activation of transcription of G1 cyclins. The process ends with the positive feedback of the G1 cyclins on the G1 CDK which commits the cell to S phase, in which DNA replication is initiated	0.727096	-0.392594	CUL5, GIGYF2, ATM, BACH1, CDK1, DDX3X, SKP2, CUL4B, NPAT, ADAM17, CDKN1B, CNOT8, PKD2, RB1, CCNE2, ANKRD17, SOX4, CDKN2B, SENP2, RPA3, CDC7, LSM11, PPP6C, CDC73, RANBP1, ZPR1, CNOT6	ID2, CARM1, PLK3
GO:0090304	nucleic acid metabolic process	3297	36	27.43	1425	0.02631	0.47096	0.955957	1	Any cellular metabolic process involving nucleic acids	1.14458	-1.245	UFL1, LIN9, IL1RAP, SMAD5, PRKAA1, PKN2, ASCC3, ATAD2B, GDF6, DDX20, PRPF39, STRN3, UBE2D2, WWTR1, MBNL2, QKI, TGFBR1, DSCC1, GTF2H2, KLHL15, TRMT13, KLF5, NMD3, CLOCK, ZRANB2, HOXA3, XPO1, CDK5R1, ATF2, PRPF38B, TRNT1, ASH1L, NUDT21, ZNF618, NEK7, RPS6KA3, FUBP3, EID1, RMI1, GJA1, TDG, ERI2, PHIP, MAP3K2, MED13, PHF6, SKIL, NUFIP1, ELAVL2, TNKS2, PRKAR1A, HMGN5, ATM, FOSL2, ARMCX3, CAND1, RNF6, …	HTRA1, SPP1, FZD5, HOXB9, HMOX1, GRWD1, MIER3, LZTS1, CDK11A, NEIL1, DYRK1B, ZNF41, ZNF17, ZNF512B, PIF1, CRTC1, LCMT2, ZNF777, WDR4, ZNF219, ZBTB7A, ZNF480, WASL, SLX4, ZNF85, ZNF446, RIOX1, ZNF16, EFEMP1, MAP3K10, RNF2, RRP7BP, MAP3K9, MTREX, ZBTB45, E2F8, ISL2, ZNF213, CBFA2T2, FLNA, ARID4B, MNT, MED26, ZNF414, MZF1, PTCH1, HEMK1, NRF1, YAP1, ZNF142, ZNF329, ZNF200, EMG1, AC138696.1, ZNF669, M…
GO:0000377	RNA splicing, via transesterification re...	275	6	2.29	144	0.02648	0.02648	0.955957	1	Splicing of RNA via a series of two transesterification reactions with a bulged adenosine residue from the intron branch point as the initiating nucleophile. When the initial RNA for the splicing reaction is a single molecule (cis splicing), the excised intron is released in a lariat structure	0.772504	-0.429201	DDX20, PRPF39, MBNL2, NUDT21, ELAVL2, PSIP1, LSM5, HNRNPA3, PTBP2, PNN, CELF1, WTAP, SRSF1, YTHDC1, KHDRBS1, DYRK1A, CWC15, MAGOHB, RNPC3, PAPOLA, GTF2F2, SNRPE, SFPQ, POLR2K, CWC27, RBM22, NSRP1, PPIL1	MTREX, AC009690.3, SRPK3, PRPF40B, WDR33
GO:0000398	mRNA splicing, via spliceosome	275	6	2.29	145	0.02648	0.02648	0.955957	1	The joining together of exons from one or more primary transcripts of messenger RNA (mRNA) and the excision of intron sequences, via a spliceosomal mechanism, so that mRNA consisting only of the joined exons is produced	0.772504	-0.429201	DDX20, PRPF39, MBNL2, NUDT21, ELAVL2, PSIP1, LSM5, HNRNPA3, PTBP2, PNN, CELF1, WTAP, SRSF1, YTHDC1, KHDRBS1, DYRK1A, CWC15, MAGOHB, RNPC3, PAPOLA, GTF2F2, SNRPE, SFPQ, POLR2K, CWC27, RBM22, NSRP1, PPIL1	MTREX, AC009690.3, SRPK3, PRPF40B, WDR33
GO:0044249	cellular biosynthetic process	3767	40	31.34	773	0.02686	0.19391	0.962898	1	The chemical reactions and pathways resulting in the formation of substances, carried out by individual cells	1.15912	-1.2637	UFL1, LIN9, IL1RAP, SMAD5, SERP1, PRKAA1, PKN2, ASCC3, PPP1CB, ATAD2B, GDF6, SGMS1, DDX20, STRN3, UBE2D2, WWTR1, PDP1, ETNK1, DCK, SECISBP2L, QKI, TGFBR1, DSCC1, GTF2H2, KLF5, MAT2B, NMD3, CLOCK, ZRANB2, HOXA3, ZDHHC20, XPO1, POGLUT1, UHMK1, CDK5R1, GIGYF2, ATF2, AGL, UBE2J1, ASH1L, NUDT21, GALNT7, ZNF618, NEK7, UGDH, RPS6KA3, PIGB, FUBP3, EID1, RMI1, GJA1, TDG, PHIP, MRPS18C, MAP3K2, RBMS3, ST6G…	HTRA1, SPP1, FZD5, HOXB9, HMOX1, GRWD1, DAGLA, LTB4R2, MIER3, LZTS1, CDK11A, DYRK1B, ZNF41, ZNF17, B3GNT3, ADAMTSL4, ZNF512B, PIF1, CRTC1, CHCHD10, B3GNT9, ZNF777, PTH1R, ZNF219, GSTM4, ZBTB7A, ZNF480, WASL, SLX4, ZNF85, ZNF446, MAN2A2, RIOX1, ZNF16, EFEMP1, MAP3K10, EOGT, ABCA7, RNF2, MAP3K9, PLTP, ZBTB45, E2F8, MGST1, ISL2, ZNF213, CBFA2T2, FLNA, ARID4B, MNT, MED26, ZNF414, MZF1, PTCH1, IBA57, …
GO:0071363	cellular response to growth factor stimu...	353	7	2.94	146	0.02692	0.02692	0.962898	1	Any process that results in a change in state or activity of a cell (in terms of movement, secretion, enzyme production, gene expression, etc.) as a result of a growth factor stimulus	0.848591	-0.755984	SMAD5, GDF6, ADAM9, TGFBR1, SKIL, LEMD3, CTDSPL2, EEF2K, EDN1, KLF4, SHOC2, RBPJ, DLX1, CPS1, HIF1A, COL3A1, ADAM17, SHISA2, SPART, SIRT1, FGF2, CTNNB1, KIDINS220, GCLC, TRIM33, MSX2, SNAI2, YES1, MAP3K7, PTK2, NLK, SHCBP1, BAG4, ZFP36L2, CDKN2B, URI1, PDE8A, PTPRK, ZNF451, TOB1, SMAD3, CYR61, GTF2F2, SMAD4, FOXO3, PBLD, POLR2K, SKI, BPTF, ZFYVE16, ZPR1, WNT5A, RUNX2, BECN1, CPNE3	HTRA1, CORO1A, ITGB3, SMAD1, COL1A2, SRC, ZEB1, GAS6, FBXL15, GPC1, PARD6A, SCX, SLC9A6
GO:0030834	regulation of actin filament depolymeriz...	31	2	0.26	2134	0.02717	1	0.962898	1	Any process that modulates the frequency, rate or extent of the disassembly of actin filaments by the removal of actin monomers from a filament	0.326719	-0.178214	MTPN, CAPZA1	TMOD1
GO:0032648	regulation of interferon-beta production	31	2	0.26	147	0.02717	0.02717	0.962898	1	Any process that modulates the frequency, rate, or extent of interferon-beta production	0.384823	-0.216861	POLR3G, DDX3X
GO:0097306	cellular response to alcohol	31	2	0.26	2135	0.02717	1	0.962898	1	Any process that results in a change in state or activity of a cell (in terms of movement, secretion, enzyme production, gene expression, etc.) as a result of an alcohol stimulus	0.557296	-0.251398	PRKAA1, KLF4, HMGCS1, CTNNB1, ADCY7, PRKCE, BRCA1, CTNNA1	PTCH1
GO:0051254	positive regulation of RNA metabolic pro...	876	13	7.29	411	0.02725	0.09164	0.962898	1	Any process that activates or increases the frequency, rate or extent of the chemical reactions and pathways involving RNA	0.971638	-0.894128	SMAD5, ATAD2B, GDF6, WWTR1, TGFBR1, KLF5, NMD3, CLOCK, ATF2, ASH1L, RPS6KA3, FUBP3, PHIP, MAP3K2, MED13, NUFIP1, HMGN5, FOSL2, ARMCX3, CAND1, RNF6, LGR4, RARB, BACH1, MYBL1, FLI1, EDN1, KLF4, PRDM2, NR1D2, ATXN7, ZFHX3, DDX3X, KAT6A, CHD1, RBPJ, FOXN3, DLX1, CDK8, NFIB, CCNC, TRIM24, HIF1A, REST, NPAT, CHD6, CNOT8, RIOK2, PICALM, PKD2, TBL1XR1, ASF1A, SIRT1, TOP2A, FGF2, CTNNB1, RB1, TFAM, HOXC13…	SPP1, FZD5, HOXB9, DYRK1B, CRTC1, E2F8, ARID4B, MZF1, PTCH1, NRF1, YAP1, ZNF567, SMAD1, SRC, MED25, ID2, ZEB1, ZKSCAN3, BRF1, CARM1, JUNB, TFEB, AXIN1, KMT2B, IKBKG, CEBPD, MYO6, MEIS3, PIAS2, DBP, SIN3A, FLT3LG, AGRN, MED16, SOX12, SCX, ZBTB7B, SUPT3H, ZFP90, GLI2, GLIS2, EPC1, TCEA2
GO:0051091	positive regulation of sequence-specific...	138	4	1.15	148	0.02766	0.02766	0.973944	1	Any process that activates or increases the frequency, rate or extent of activity of a transcription factor, any factor involved in the initiation or regulation of transcription	0.685054	-0.457817	IL1RAP, CLOCK, ATF2, EDN1, MTPN, CTNNB1, TAF1, PRKCI, MAP3K7, CHUK, KRAS, FER, UBE2N, TRAF6, GTF2A2, TRIM32, WNT5A, STK3, PRDX3	CRTC1, AMH, CARM1, IKBKG, TRAPPC9, RBCK1
GO:0045727	positive regulation of translation	79	3	0.66	1290	0.02784	0.39244	0.976842	1	Any process that activates or increases the frequency, rate or extent of the chemical reactions and pathways resulting in the formation of proteins by the translation of mRNA	0.602561	-0.242338	SERP1, UHMK1, RBMS3, DDX3X, KHDRBS1, SOX4, LARP4, TRMT10C
GO:0044702	single organism reproductive process	608	10	5.06	149	0.02819	0.02819	0.984321	1	A biological process that directly contributes to the process of producing new individuals, involving a single organism	0.980679	-1.14532	SMAD5, AGFG1, DDX20, SPIN4, QKI, TGFBR1, CLIC4, PARP11, CLOCK, UBE2J1, KNL1, ASH1L, GJA1, TMED2, SKIL, PRKAR1A, ATM, ACOX1, LGR4, LEMD3, CCNI, CADM1, EDN1, CDK1, TUBD1, FNDC3A, BIRC6, HMGCS1, RBPJ, HIF1A, ACSL4, CDKN1B, KIF18A, DSG2, PKD2, SIRT1, TOP2A, CTNNB1, BRIP1, DDX6, CCNYL1, TSNAX, CELF1, RAD21, SPAG9, CCNE2, MSX2, TOB2, SPA17, IFT81, H3F3A, PTK2, CLDN11, DNAJA1, TTC26, AFF4, ADCY7, STAG2,…	HTRA1, SPP1, IGFBP7, FZD5, AURKC, SLX4, RNF2, TYRO3, E2F8, MGST1, ARID4B, GGNBP1, TRIM36, AC138696.1, SMAD1, SRC, AMH, TESK1, JUNB, TFEB, KMT2B, ADAM15, ZFP41, TESK2, SBF1, SCX, GLI2, ZNF35, WDR33
GO:0033365	protein localization to organelle	697	11	5.8	247	0.02825	0.05679	0.984321	1	A process in which a protein is transported to, or maintained in, a location within an organelle	1.01327	-0.59316	GDAP1, G3BP2, TIMM17A, CENPQ, WWTR1, CCDC14, TGFBR1, NMD3, XPO1, BNIP3L, TRNT1, KNL1, ARF6, TNKS2, OSBPL8, RAB8B, UGCG, CHAMP1, HOOK3, KPNA3, SRP9, TOR1AIP2, CDK1, DDX3X, MORC3, MGARP, CD2AP, SEC63, NUP58, NRAS, ESCO2, KPNA1, PKD2, IMMP1L, SIRT1, HEATR3, RPL21, CTNNB1, YWHAG, RB1, RAD21, RAB3GAP2, PEX3, IPO7, SNAI2, TAF3, FBXW11, DNAJA1, EIF2AK3, TIMM10B, BAG4, RAB10, TOB1, SNX16, SMAD3, SMAD4, O…	FZD5, ABCA7, FLNA, PRELID3A, MRNIP, SRC, GAS6, TSPAN10, CARM1, GBF1, PEX16, GNL3L, TONSL, SIN3A, AC005670.2, NEDD1, RBCK1, PARD6A, GLIS2
GO:0042254	ribosome biogenesis	281	6	2.34	150	0.02904	0.02904	1	1	A cellular process that results in the biosynthesis of constituent macromolecules, assembly, and arrangement of constituent parts of ribosome subunits; includes transport to the sites of protein synthesis	0.684079	-0.445925	NMD3, XPO1, ERI2, C1D, DDX3X, RIOK2, SIRT1, HEATR3, UTP23, RPL21, WDR43, RPS3A, RPS25, RPF1, NOL11, PA2G4, ABCE1, ERI1	RRP7BP, MTREX, EMG1, TBL3, GNL3L
GO:0030036	actin cytoskeleton organization	359	7	2.99	620	0.02916	0.14587	1	1	A process that is carried out at the cellular level which results in the assembly, arrangement of constituent parts, or disassembly of cytoskeletal structures comprising actin filaments and their associated proteins	0.871591	-0.553502	PHLDB2, COBLL1, TGFBR1, MAP3K1, ARPC1B, CDK5R1, ARHGAP18, ARF6, MAP3K2, PRKAR1A, GMFB, EDN1, SSH2, MYO1B, CORO2A, RICTOR, PARVA, CD2AP, MARCKS, ARPC5, GAS2L3, MTPN, MYPN, OPHN1, ROCK1, PRKCI, PLS3, CAPZA1, ARFIP1, KRAS, EPB41L2, FCHSD2, BAG4, PRKCE, PRKG1, FER, RACGAP1, ROCK2, SMAD3, PDCD6IP, SMAD4, EPB41L4A, CTNNA1, ABI2, CNN3, MYOM2, TRIM32, TTC17	CORO1A, WASL, FLNA, MKLN1, SRC, INF2, TMOD1, ATP2C1, ARHGDIA, ALMS1, FHOD3, TESK2, ARAP1
GO:1903902	positive regulation of viral life cycle	81	3	0.67	608	0.02969	0.13979	1	1		0.586453	-0.244622	PKN2, DDX3X, CHD1, TOP2A, VPS4B, YTHDC2, GTF2F2, CHMP2B, POLR2K, NUCKS1
GO:0044843	cell cycle G1/S phase transition	209	5	1.74	151	0.02971	0.02971	1	1	The cell cycle process by which a cell in G1 phase commits to S phase	0.727096	-0.392594	CUL5, GIGYF2, ATM, BACH1, CDK1, DDX3X, SKP2, CUL4B, NPAT, ADAM17, CDKN1B, CNOT8, PKD2, RB1, TAF1, CCNE2, ANKRD17, SOX4, CDKN2B, SENP2, RPA3, CDC7, LSM11, PPP6C, CDC73, RANBP1, ZPR1, CNOT6	ID2, CARM1, PLK3
GO:0045786	negative regulation of cell cycle	442	8	3.68	308	0.02974	0.06889	1	1	Any process that stops, prevents or reduces the rate or extent of progression through the cell cycle	0.927788	-0.50501	PRKAA1, CUL5, TIPRL, TGFBR1, CLOCK, UHMK1, CDK5R1, GIGYF2, ATF2, KNL1, SKIL, PRKAR1A, HMGN5, ATM, CDK1, ZFHX3, DNA2, TOPBP1, FOXN3, CDKN1B, CNOT8, PKD2, TOP2A, RINT1, CTNNB1, BRIP1, RB1, RAD21, CCNE2, KHDRBS1, STAG2, ZFP36L2, SOX4, CDKN2B, NBN, PTPRK, GEN1, SMAD3, KAT2B, MAP3K20, CDC73, BRCA1, BRCC3, NDC80, TOP2B, SPDL1, PA2G4, CNOT6, STRADB	E2F8, MRNIP, GAS2L1, MED25, ID2, GAS6, CARM1, PLK3, CLSPN, BRSK1, XPC
GO:0010467	gene expression	3325	36	27.66	1114	0.03002	0.30893	1	1	The process in which a gene's sequence is converted into a mature gene product or products (proteins or RNA). This includes the production of an RNA transcript as well as any processing to produce a mature RNA product or an mRNA (for protein-coding genes) and the translation of that mRNA into protein. Some protein processing events may be included when they are required to form an active form of …	1.16208	-1.23085	UFL1, LIN9, IL1RAP, SMAD5, SERP1, PRKAA1, PKN2, ASCC3, AGFG1, PPP1CB, ATAD2B, GDF6, DDX20, PRPF39, STRN3, UBE2D2, WWTR1, MBNL2, SECISBP2L, QKI, TGFBR1, GTF2H2, TRMT13, KLF5, CLOCK, ZRANB2, HOXA3, XPO1, UHMK1, CDK5R1, GIGYF2, ATF2, PRPF38B, TRNT1, ASH1L, NUDT21, ZNF618, RPS6KA3, FUBP3, EID1, TDG, ERI2, TMED2, PHIP, MRPS18C, MAP3K2, RBMS3, MED13, PHF6, SKIL, NUFIP1, ELAVL2, PRKAR1A, HMGN5, ATM, FOS…	HTRA1, SPP1, FZD5, HOXB9, HMOX1, MIER3, LZTS1, CDK11A, DYRK1B, ZNF41, ZNF17, ZNF512B, CSF1, OMA1, CRTC1, LCMT2, ZNF777, WDR4, ZNF219, ZBTB7A, ZNF480, WASL, ZNF85, ACTA2, ZNF446, RIOX1, ZNF16, EFEMP1, MAP3K10, RNF2, RRP7BP, MAP3K9, MTREX, ZBTB45, E2F8, ISL2, ZNF213, CBFA2T2, FLNA, ARID4B, MNT, MED26, ZNF414, MZF1, PTCH1, NRF1, YAP1, ZNF142, ZNF329, ZNF200, EMG1, AC138696.1, ZNF669, ZNF567, HOXB6, …
GO:0030042	actin filament depolymerization	33	2	0.27	2136	0.03053	1	1	1	Disassembly of actin filaments by the removal of actin monomers from a filament	0.326719	-0.192127	MTPN, CAPZA1	TMOD1
GO:0030837	negative regulation of actin filament po...	33	2	0.27	2137	0.03053	1	1	1	Any process that stops, prevents, or reduces the frequency, rate or extent of actin polymerization	0.320763	-0.249873	MTPN, CAPZA1	TMOD1, FHOD3
GO:0032608	interferon-beta production	33	2	0.27	153	0.03053	0.03053	1	1	The appearance of interferon-beta due to biosynthesis or secretion following a cellular stimulus, resulting in an increase in its intracellular or extracellular levels	0.384823	-0.221194	POLR3G, DDX3X
GO:0043486	histone exchange	33	2	0.27	154	0.03053	0.03053	1	1	The replacement, within chromatin, of resident histones or histone subunits with alternative, sometimes variant, histones or subunits	0.5586	-0.0631698	CENPQ, KNL1, ANP32E, CENPK, ITGB3BP, MIS18BP1
GO:0007507	heart development	285	6	2.37	1883	0.03083	0.84372	1	1	The process whose specific outcome is the progression of the heart over time, from its formation to the mature structure. The heart is a hollow, muscular organ, which, by contracting rhythmically, keeps up the circulation of the blood	0.773651	-0.529201	TGFBR1, ATF2, GJA1, TMED2, PRKAR1A, ATM, RARB, BICC1, EDN1, CDK1, RBPJ, LOX, C3orf58, PARVA, HIF1A, REST, COL3A1, DSG2, PKD2, FGF2, MYPN, HEG1, CTNNB1, RB1CC1, EFNB2, MSX2, SNAI2, PTK2, SOX4, SENP2, IFT74, SMAD3, CYR61, ADAMTS1, SMAD4, PDLIM5, TBX3, WNT5A, ARMC4, STK3	BORCS8-MEF2B, SEC24B, PTCH1, YAP1, SMAD1, ID2, ADAM15, COL11A1, FHOD3, SCX, GLI2
GO:0017038	protein import	212	5	1.76	419	0.03133	0.09476	1	1	The targeting and directed movement of proteins into a cell or organelle. Not all import involves an initial targeting event	0.816276	-0.426881	G3BP2, TIMM17A, WWTR1, TGFBR1, RAB8B, KPNA3, CDK1, NUP58, KPNA1, PKD2, SIRT1, HEATR3, CTNNB1, PEX3, IPO7, SNAI2, FBXW11, TOB1, SMAD3, SMAD4, PBLD, RANBP1, RBM22, F2R, ZPR1, NUP155	FLNA, GAS6, PEX16, TONSL, RBCK1
GO:0032984	macromolecular complex disassembly	212	5	1.76	839	0.03133	0.21413	1	1	The disaggregation of a macromolecular complex into its constituent components	0.613815	-0.583177	MRPS18C, KIF5B, DNAJC6, KIF18A, MTPN, CTNNB1, MRPL33, VPS4B, CAPZA1, DENR, PTCD3, MRPL30, MRPL35, CHMP2B, NAPB, MRPL47, SMARCE1, ABCE1	FZD5, GRWD1, STMN3, KLC1, TMOD1, AXIN1, AMER1
GO:0000722	telomere maintenance via recombination	34	2	0.28	155	0.03226	0.03226	1	1	Any recombinational process that contributes to the maintenance of proper telomeric length	0.365277	-0.196594	DNA2, RFC3, POLD3, RPA3
GO:0006296	nucleotide-excision repair, DNA incision...	34	2	0.28	156	0.03226	0.03226	1	1	The endonucleolytic cleavage of the damaged strand of DNA 5' to the site of damage. The incision occurs at the junction of single-stranded DNA and double-stranded DNA that is formed when the DNA duplex is unwound. The incision follows the incision formed 3' to the site of damage	0.475211	-0.149019	GTF2H2, CUL4B, POLK, RFC3, POLD3, RPA3
GO:0042769	DNA damage response, detection of DNA da...	34	2	0.28	157	0.03226	0.03226	1	1	The series of events required to receive a stimulus indicating DNA damage has occurred and convert it to a molecular signal	0.461156	-0.137756	USP1, CUL4B, RFC3, DNAJA1, SOX4, POLD3, RPA3	PNKP
GO:0070848	response to growth factor	367	7	3.05	158	0.03233	0.03233	1	1	Any process that results in a change in state or activity of a cell or an organism (in terms of movement, secretion, enzyme production, gene expression, etc.) as a result of a growth factor stimulus	0.848591	-0.755984	SMAD5, GDF6, ADAM9, TGFBR1, SKIL, LEMD3, CTDSPL2, EEF2K, EDN1, KLF4, ZFHX3, SHOC2, RBPJ, DLX1, CPS1, HIF1A, COL3A1, ADAM17, SHISA2, SPART, SIRT1, FGF2, CTNNB1, KIDINS220, GCLC, TRIM33, MSX2, SNAI2, YES1, MAP3K7, PTK2, NLK, SHCBP1, BAG4, ZFP36L2, CDKN2B, URI1, PDE8A, PTPRK, FER, ZNF451, TOB1, SMAD3, CYR61, GTF2F2, SMAD4, FOXO3, PBLD, POLR2K, SKI, BPTF, ZFYVE16, ZPR1, WNT5A, RUNX2, BECN1, CPNE3	HTRA1, CORO1A, ITGB3, SMAD1, COL1A2, SRC, ZEB1, GAS6, FBXL15, GPC1, PARD6A, SCX, SLC9A6
GO:0045861	negative regulation of proteolysis	145	4	1.21	2138	0.03236	1	1	1	Any process that stops, prevents, or reduces the frequency, rate or extent of the hydrolysis of a peptide bond or bonds within a protein	0.697196	-0.403005	CRIM1, RPS6KA3, KLF4, DDX3X, BIRC6, TNFAIP8, FNIP1, PICALM, TFPI, OPHN1, TAF1, SENP1, ARL6IP1, SH3RF1, CD55, CD46, PRDX3	WFIKKN1, SRC, GAS6, POR
GO:0002051	osteoblast fate commitment	4	1	0.03	159	0.03287	0.03287	1	1	The commitment of mesenchymal cells to the specific cell fate of an osteoblast. An osteoblast is a bone-forming cell which secretes an extracellular matrix. Hydroxyapatite crystals are then deposited into the matrix to form bone	0.184065	0.184065	SMAD5, RUNX2	SMAD1
GO:0003266	regulation of secondary heart field card...	4	1	0.03	160	0.03287	0.03287	1	1	Any process that modulates the frequency, rate or extent of cardioblast proliferation in the second heart field. A cardioblast is a cardiac precursor cell. It is a cell that has been committed to a cardiac fate, but will undergo more cell division rather than terminally differentiating. The secondary heart field is the region of the heart that will form the majority of the mesodermal component of…	-0.00544833	-0.00544833	CTNNB1
GO:0003339	regulation of mesenchymal to epithelial ...	4	1	0.03	161	0.03287	0.03287	1	1	Any process that modulates the rate, frequency or extent of the transition where a mesenchymal cell establishes apical/basolateral polarity,forms intercellular adhesive junctions, synthesizes basement membrane components and becomes an epithelial cell that will contribute to the shaping of the metanephros	0.129014	0.129014	CTNNB1, STAT1
GO:0005981	regulation of glycogen catabolic process	4	1	0.03	162	0.03287	0.03287	1	1	Any process that modulates the frequency, rate or extent of the chemical reactions and pathways resulting in the breakdown of glycogen	0.32854	0.32854	PPP1CB, PPP1R3D
GO:0007023	post-chaperonin tubulin folding pathway	4	1	0.03	163	0.03287	0.03287	1	1	Completion of folding of alpha- and beta-tubulin; takes place subsequent to chaperonin-mediated partial folding; mediated by a complex of folding cofactors	0.16375	0.16375	TBCA
GO:0007406	negative regulation of neuroblast prolif...	4	1	0.03	164	0.03287	0.03287	1	1	Any process that stops, prevents, or reduces the frequency, rate or extent of the proliferation of neuroblasts	-0.189688	-0.189688	CTNNA1	KCTD11
GO:0016338	calcium-independent cell-cell adhesion v...	4	1	0.03	165	0.03287	0.03287	1	1	The attachment of one cell to another cell via adhesion molecules that do not require the presence of calcium for the interaction	0.291723	0.291723	CLDN12, CLDN11
GO:0021681	cerebellar granular layer development	4	1	0.03	2139	0.03287	1	1	1	The process whose specific outcome is the progression of the cerebellar granule layer over time, from its formation to the mature structure. The granular layer is the innermost layer of the cerebellar cortex. This layer contains densely packed small neurons, mostly granule cells. Some Golgi cells are found at the outer border. Granule neurons send parallel fibers to the upper molecular layer, whe…	0.240485	0.240485	MTPN
GO:0032780	negative regulation of ATPase activity	4	1	0.03	166	0.03287	0.03287	1	1	Any process that stops or reduces the rate of ATP hydrolysis by an ATPase	0.0922899	0.0922899	CNN3
GO:0032892	positive regulation of organic acid tran...	4	1	0.03	2140	0.03287	1	1	1	Any process that activates or increases the frequency, rate or extent of the directed movement of organic acids into, out of or within a cell, or between cells, by means of some agent such as a transporter or pore	0.342204	0.342204	EDN1, ARL6IP1
GO:0035112	genitalia morphogenesis	4	1	0.03	167	0.03287	0.03287	1	1	The process in which the anatomical structures of genitalia are generated and organized. The genitalia are the organs of reproduction or generation, external and internal	0.14245	0.14245	CTNNB1
GO:0045091	regulation of single stranded viral RNA ...	4	1	0.03	2141	0.03287	1	1	1	Any process that modulates the frequency, rate or extent of single stranded viral RNA replication via double stranded DNA intermediate	-0.0129087	-0.0129087	TOP2A
GO:0045743	positive regulation of fibroblast growth...	4	1	0.03	168	0.03287	0.03287	1	1	Any process that activates or increases the frequency, rate or extent of fibroblast growth factor receptor signaling pathway activity	0.000797259	0.000797259	CTNNB1
GO:0048617	embryonic foregut morphogenesis	4	1	0.03	169	0.03287	0.03287	1	1	The process in which the anatomical structures of the foregut are generated and organized, during the embryonic phase	0.224519	0.224519	CTNNB1, SMAD3
GO:0061197	fungiform papilla morphogenesis	4	1	0.03	170	0.03287	0.03287	1	1	The process in which the anatomical structures of the fungiform papilla are generated and organized. The fungiform papilla is a mushroom-shaped papilla of the tongue	0.268704	0.268704	CTNNB1
GO:0061550	cranial ganglion development	4	1	0.03	171	0.03287	0.03287	1	1	The process whose specific outcome is the progression of a cranial ganglion over time, from its formation to the mature structure	0.0515998	0.0515998	CTNNB1
GO:0071609	chemokine (C-C motif) ligand 5 productio...	4	1	0.03	172	0.03287	0.03287	1	1	The appearance of chemokine (C-C motif) ligand 5 due to biosynthesis or secretion following a cellular stimulus, resulting in an increase in its intracellular or extracellular levels	0.19403	0.19403	DDX3X
GO:0097459	iron ion import into cell	4	1	0.03	173	0.03287	0.03287	1	1	The directed movement of iron ions from outside of a cell into the cytoplasmic compartment. This may occur via transport across the plasma membrane or via endocytosis	0.0643006	0.0643006	PICALM
GO:1903333	negative regulation of protein folding	4	1	0.03	2142	0.03287	1	1	1	Any process that stops, prevents or reduces the frequency, rate or extent of protein folding	0.0507764	0.0507764
GO:1904796	regulation of core promoter binding	4	1	0.03	174	0.03287	0.03287	1	1		0.292017	0.292017	KLF4, CTNNB1
GO:1905049	negative regulation of metallopeptidase ...	4	1	0.03	2143	0.03287	1	1	1		0.189354	0.189354	PICALM
GO:1905939	regulation of gonad development	4	1	0.03	175	0.03287	0.03287	1	1		0.0184103	0.0184103		AMH
GO:2000812	regulation of barbed-end actin filament ...	4	1	0.03	176	0.03287	0.03287	1	1	Any process that modulates the frequency, rate or extent of barbed-end actin filament capping	0.269293	0.269293	MTPN
GO:0097305	response to alcohol	85	3	0.71	1452	0.03358	0.48386	1	1	Any process that results in a change in state or activity of a cell or an organism (in terms of movement, secretion, enzyme production, gene expression, etc.) as a result of an alcohol stimulus	0.65598	-0.351786	PRKAA1, TGFBR1, KLF4, CDK1, HMGCS1, CTNNB1, ADCY7, PRKCE, BRCA1, CTNNA1	PTCH1, NQO1
GO:0009987	cellular process	8168	72	67.95	1271	0.03379	0.38004	1	1	Any process that is carried out at the cellular level, but not necessarily restricted to a single cell. For example, cell communication occurs among more than one cell, but occurs at the cellular level	1.22469	-1.6735	MIGA1, SLC4A7, UFL1, GDAP1, LIN9, PRKAR2B, IL1RAP, SMAD5, SLAIN2, SERP1, G3BP2, PRKAA1, PKN2, ASCC3, CRIM1, DENND6A, AGFG1, PPP1CB, SH3D19, ATAD2B, KCNK1, GDF6, TIMM17A, LRRC40, CUL5, PTPRG, SGMS1, DDX20, PRPF39, STRN3, CENPQ, CHML, UBE2D2, WWTR1, PDP1, SLC25A24, DCUN1D4, ETNK1, DCK, PHLDB2, MBNL2, RASSF3, SECISBP2L, TIPRL, ADAM9, COBLL1, QKI, TGFBR1, DSCC1, BCHE, ERAP1, GTF2H2, PGRMC2, FAM126A, …	CRYAB, HTRA1, SPP1, PANX2, ADAM11, IGFBP7, OSGIN1, FZD5, CNIH2, HOXB9, HMOX1, AURKC, GRWD1, DAGLA, LTB4R2, MIER3, ITGB4, PLEKHG5, SEMA6C, LZTS1, GPR68, CDK11A, NEIL1, GRIN2D, DYRK1B, ZNF41, STMN3, ZNF17, TNFRSF19, B3GNT3, TCN2, ADAMTSL4, SLC9A3, NECTIN1, SLC30A3, CORO1A, ZNF512B, CSF1, ASB16, RAB4B-EGLN2, EHD3, SLC12A6, SLC7A11, KREMEN2, LAT2, OMA1, TRPM4, PIF1, IGFBP2, BOC, TM9SF1, CRTC1, CHCHD1…
GO:0042475	odontogenesis of dentin-containing tooth	35	2	0.29	177	0.03404	0.03404	1	1	The process whose specific outcome is the progression of a dentin-containing tooth over time, from its formation to the mature structure. A dentin-containing tooth is a hard, bony organ borne on the jaw or other bone of a vertebrate, and is composed mainly of dentin, a dense calcified substance, covered by a layer of enamel	0.492475	-0.730546	ATF2, DLX1, CTNNB1, MSX2, TRAF6, ITGA6, CTNNA1, RUNX2	HTRA1, ITGB4, NECTIN1, CSF1, LAMA5, ANKRD11, GLI2
GO:0090329	regulation of DNA-dependent DNA replicat...	35	2	0.29	2144	0.03404	1	1	1	Any process that modulates the rate, frequency, or extent of DNA-dependent DNA replication, the process in which new strands of DNA are synthesized, using parental DNA as a template for the DNA-dependent DNA polymerases that synthesize the new strands	0.462332	-0.256442	DSCC1, RFC3, STAG2, SENP2, NBN, CDC7	E2F8
GO:0010941	regulation of cell death	904	13	7.52	1555	0.03411	0.55543	1	1	Any process that modulates the rate or frequency of cell death. Cell death is the specific activation or halting of processes within a cell so that its vital functions markedly cease, rather than simply deteriorating gradually over time, which culminates in cell death	1.00736	-1.08453	UFL1, PRKAA1, GDF6, DDX20, SLC25A24, RASSF3, TGFBR1, BNIP3L, CDK5R1, ATF2, RPS6KA3, PHIP, SKIL, HMGN5, ATM, RARB, EEF2K, EDN1, KLF4, CDK1, CARD8, DDX3X, EEF1E1, BIRC6, TNFAIP8, SKP2, FIGNL1, DLX1, TRIM24, HIF1A, SGK3, REST, ADAM17, FNIP1, CDKN1B, PICALM, SIRT1, TOP2A, C5AR1, FGF2, CTNNB1, YWHAG, SOD2, VPS4B, CYP1B1, ROCK1, RB1CC1, ZC3H8, SENP1, GCLC, NET1, OPA1, PRKCI, MSX2, SUDS3, SNAI2, PTK2, H…	CRYAB, OSGIN1, HMOX1, PLEKHG5, ADAMTSL4, CORO1A, OMA1, TNFRSF25, ZNF16, PLEKHF1, MAP3K10, MAP3K9, TYRO3, FLNA, MNT, CD274, YAP1, SRC, CLIP3, PELI3, GAS6, COL18A1, SPHK2, JUNB, NQO1, TMEM259, IKBKG, ARHGDIA, PLK3, OXR1, ALX3, MEIS3, RABGGTA, TMEM161A, SIN3A, FLT3LG, CD34, HIPK3, RBCK1, SCX, GLI2, PYCR1, SCG2, POR
GO:1901576	organic substance biosynthetic process	3820	40	31.78	880	0.03412	0.22251	1	1	The chemical reactions and pathways resulting in the formation of an organic substance, any molecular entity containing carbon	1.15912	-1.29206	UFL1, LIN9, IL1RAP, SMAD5, SERP1, PRKAA1, PKN2, ASCC3, PPP1CB, ATAD2B, ACBD3, GDF6, SGMS1, DDX20, STRN3, UBE2D2, WWTR1, PDP1, ETNK1, DCK, SECISBP2L, QKI, TGFBR1, DSCC1, GTF2H2, KLF5, MAT2B, NMD3, CLOCK, ZRANB2, HOXA3, ZDHHC20, XPO1, PPIP5K2, POGLUT1, UHMK1, CDK5R1, GIGYF2, ATF2, AGL, UBE2J1, ASH1L, NUDT21, GALNT7, ZNF618, NEK7, UGDH, RPS6KA3, PIGB, FUBP3, EID1, RMI1, GJA1, TDG, PHIP, MRPS18C, MAP…	HTRA1, SPP1, IGFBP7, FZD5, HOXB9, HMOX1, GRWD1, LTB4R2, MIER3, LZTS1, CDK11A, DYRK1B, ZNF41, ZNF17, B3GNT3, ADAMTSL4, ZNF512B, PIF1, CRTC1, CHCHD10, B3GNT9, LCMT2, ZNF777, PTH1R, ZNF219, GSTM4, ZBTB7A, ZNF480, WASL, SLX4, ZNF85, ZNF446, MAN2A2, RIOX1, ZNF16, EFEMP1, MAP3K10, EOGT, ABCA7, RNF2, MAP3K9, PLTP, ZBTB45, E2F8, MGST1, ISL2, ZNF213, CBFA2T2, FLNA, ARID4B, MNT, MED26, ZNF414, MZF1, PTCH1,…
GO:0043065	positive regulation of apoptotic process	373	7	3.1	1340	0.03486	0.42066	1	1	Any process that activates or increases the frequency, rate or extent of cell death by apoptotic process	0.819146	-0.730423	DDX20, TGFBR1, BNIP3L, CDK5R1, ATF2, SKIL, ATM, RARB, CARD8, DDX3X, EEF1E1, TNFAIP8, REST, FNIP1, CDKN1B, SIRT1, TOP2A, CTNNB1, YWHAG, CYP1B1, ZC3H8, SENP1, NET1, PRKCI, MSX2, SUDS3, DNAJA1, EIF2AK3, ITGB3BP, SOX4, ARL6IP5, SMAD3, CYR61, EIF2S1, TRAF6, MAP3K20, ITGA6, FOXO3, SFPQ, CTNNA1, SIAH1, TIAM1, F2R, WNT5A, STK3	OSGIN1, HMOX1, PLEKHG5, ADAMTSL4, PLEKHF1, MAP3K10, MAP3K9, CD274, SRC, CLIP3, COL18A1, NQO1, RBCK1
GO:0033683	nucleotide-excision repair, DNA incision	36	2	0.3	178	0.03585	0.03585	1	1	A process that results in the endonucleolytic cleavage of the damaged strand of DNA. The incision occurs at the junction of single-stranded DNA and double-stranded DNA that is formed when the DNA duplex is unwound	0.475211	-0.183486	GTF2H2, CUL4B, POLK, RFC3, POLD3, RPA3
GO:0043242	negative regulation of protein complex d...	36	2	0.3	2145	0.03585	1	1	1	Any process that stops, prevents, or reduces the frequency, rate or extent of protein complex disassembly, the disaggregation of a protein complex into its constituent components	0.303065	-0.212469	MTPN, CAPZA1	TMOD1
GO:0044743	protein transmembrane import into intrac...	36	2	0.3	948	0.03585	0.25096	1	1	The directed movement of proteins into an intracellular organelle, across a membrane	0.438254	-0.228143	TIMM17A, RAB8B, PEX3	PEX16
GO:1901880	negative regulation of protein depolymer...	36	2	0.3	2146	0.03585	1	1	1	Any process that stops, prevents or reduces the frequency, rate or extent of protein depolymerization	0.303065	-0.212469	MTPN, CAPZA1	TMOD1
GO:0043068	positive regulation of programmed cell d...	376	7	3.13	1349	0.03618	0.42705	1	1	Any process that activates or increases the frequency, rate or extent of programmed cell death, cell death resulting from activation of endogenous cellular processes	0.819146	-0.730423	DDX20, TGFBR1, BNIP3L, CDK5R1, ATF2, SKIL, ATM, RARB, CARD8, DDX3X, EEF1E1, TNFAIP8, REST, FNIP1, CDKN1B, SIRT1, TOP2A, CTNNB1, YWHAG, CYP1B1, ZC3H8, SENP1, NET1, PRKCI, MSX2, SUDS3, DNAJA1, EIF2AK3, ITGB3BP, SOX4, ARL6IP5, SMAD3, CYR61, EIF2S1, TRAF6, MAP3K20, ITGA6, FOXO3, SFPQ, CTNNA1, SIAH1, TIAM1, F2R, WNT5A, STK3	OSGIN1, HMOX1, PLEKHG5, ADAMTSL4, PLEKHF1, MAP3K10, MAP3K9, CD274, SRC, CLIP3, COL18A1, NQO1, RBCK1
GO:0006259	DNA metabolic process	725	11	6.03	1038	0.03626	0.27816	1	1	Any cellular metabolic process involving deoxyribonucleic acid. This is one of the two main types of nucleic acid, consisting of a long, unbranched macromolecule formed from one, or more commonly, two, strands of linked deoxyribonucleotides	0.916535	-0.640466	LIN9, ASCC3, DSCC1, GTF2H2, KLHL15, NEK7, RMI1, GJA1, TDG, TNKS2, ATM, ATP23, BACH1, KLF4, PARPBP, CDK1, DNA2, DEK, RBPJ, FIGNL1, TOPBP1, PDGFC, USP1, CUL4B, NFIB, PCLAF, ESCO2, KPNA1, ASF1A, SIRT1, TOP2A, CTNNB1, BRIP1, TFAM, GINS4, ATF7IP, RECQL, POLK, RAD21, CCNE2, RFC3, PTGES3, REV1, ANKRD17, CHRAC1, PRMT6, STAG2, TOP1, SENP2, NBN, POLD3, GEN1, KDM1B, PPP4R2, UBE2N, RPA3, CDC7, BRCA1, PMS1, S…	GRWD1, NEIL1, PIF1, SLX4, E2F8, HEMK1, MRNIP, SRC, TOP3B, RTEL1, EXD2, ZFYVE26, USP43, POLM, HELQ, ENDOV, GNL3L, PNKP, TMEM161A, AC022384.1, MTA1, TONSL, SIN3A, CLSPN, DNASE1L2, GLI2, XPC, WDR33, ISG15
GO:0010608	posttranscriptional regulation of gene e...	378	7	3.14	682	0.03707	0.16677	1	1	Any process that modulates the frequency, rate or extent of gene expression after the production of an RNA transcript	0.86736	-0.383611	SERP1, SECISBP2L, QKI, XPO1, UHMK1, GIGYF2, RPS6KA3, RBMS3, SRP9, DDX3X, IREB2, AJUBA, CNOT8, MTPN, DDX6, AGO2, CELF1, EIF4G3, PTCD3, FXR1, EIF2AK3, KHDRBS1, ZFP36L2, SOX4, TOB1, SMAD3, EIF2S1, LARP4, FOXO3, TRMT10C, IGF2BP3, TNRC6B, PA2G4, CNOT6	SMAD1
GO:0035050	embryonic heart tube development	37	2	0.31	179	0.0377	0.0377	1	1	The process whose specific outcome is the progression of the embryonic heart tube over time, from its formation to the mature structure. The heart tube forms as the heart rudiment from the heart field	0.480298	-0.257415	TMED2, HIF1A, PKD2, CTNNB1, SMAD3, TBX3, WNT5A	YAP1
GO:0048678	response to axon injury	37	2	0.31	180	0.0377	0.0377	1	1	Any process that results in a change in state or activity of a cell or an organism (in terms of movement, secretion, enzyme production, gene expression, etc.) as a result of an axon injury stimulus	0.432035	-0.47489	KLF4, CDK1, EPHA4, CTNNA1	SPP1
GO:0061035	regulation of cartilage development	37	2	0.31	181	0.0377	0.0377	1	1	Any process that modulates the rate, frequency, or extent of cartilage development, the process whose specific outcome is the progression of the cartilage over time, from its formation to the mature structure. Cartilage is a connective tissue dominated by extracellular matrix containing collagen type II and large amounts of proteoglycan, particularly chondroitin sulfate	0.584872	-0.43455	GDF6, TGFBR1, RARB, CTNNB1, SNAI2, SMAD3, CYR61, WNT5A, RUNX2	EFEMP1, SMAD1, CARM1, SCX, GLI2, POR
GO:2000177	regulation of neural precursor cell prol...	37	2	0.31	2147	0.0377	1	1	1	Any process that modulates the frequency, rate or extent of neural precursor cell proliferation	0.492703	-0.402872	CDH2, HIF1A, PTBP2, CTNNB1, SHCBP1, FOXO3, CTNNA1, WNT5A	FLNA, ID2, KCTD11, GLI2
GO:0030833	regulation of actin filament polymerizat...	89	3	0.74	1397	0.03771	0.45379	1	1	Any process that modulates the frequency, rate or extent of the assembly of actin filaments by the addition of actin monomers to a filament	0.656586	-0.434298	ARPC1B, ARHGAP18, ARF6, GMFB, RICTOR, ARPC5, MTPN, CAPZA1, ARFIP1, FCHSD2, BAG4, PRKCE, FER, ABI2	CORO1A, WASL, TMOD1, FHOD3
GO:0048524	positive regulation of viral process	89	3	0.74	679	0.03771	0.16262	1	1	Any process that activates or increases the frequency, rate or extent of a multi-organism process in which a virus is a participant	0.596266	-0.255231	PKN2, DDX3X, CHD1, TOP2A, VPS4B, YTHDC2, ANKRD17, GTF2F2, CHMP2B, POLR2K, NUCKS1
GO:0001525	angiogenesis	223	5	1.86	483	0.03773	0.10894	1	1	Blood vessel formation when new vessels emerge from the proliferation of pre-existing blood vessels	0.800864	-0.636399	TGFBR1, ERAP1, CLIC4, KLF5, HOXA3, EDN1, KLF4, RBPJ, NUS1, PARVA, HIF1A, SIRT1, C5AR1, FGF2, CTNNB1, CYP1B1, ROCK1, EFNB2, UBP1, PTK2, EIF2AK3, ITGAV, ROCK2, CYR61, BRCA1, WNT5A, STAT1	FZD5, HMOX1, SLC12A6, E2F8, LAMA5, ITGB3, COL18A1, ADAM15, ENPP2, CD34, PRKX, SCG2
GO:0048608	reproductive structure development	225	5	1.87	499	0.03897	0.11162	1	1	The reproductive developmental process whose specific outcome is the progression of structures that will be used in the process of creating new individuals from one or more parents, from their formation to the mature structures	0.753201	-1.01311	TGFBR1, ASH1L, GJA1, TMED2, ATM, LGR4, FNDC3A, BIRC6, HMGCS1, RBPJ, HIF1A, CDKN1B, KIF18A, PKD2, SIRT1, CTNNB1, BRIP1, H3F3A, PTK2, SENP2, TAF4, CYR61, KLHL26, ADAMTS1, SMAD4, FOXO3, CTNNA1, BPTF, TBX3, WNT5A, STK3, PRDX3	HTRA1, SPP1, FZD5, TYRO3, E2F8, MGST1, ARID4B, SRC, AMH, JUNB, TFEB, KMT2B, ADAM15, SCX, GLI2
GO:0016525	negative regulation of angiogenesis	38	2	0.32	182	0.03958	0.03958	1	1	Any process that stops, prevents, or reduces the frequency, rate or extent of angiogenesis	0.42364	-0.29861	KLF4, CTNNB1, ROCK1, ROCK2, STAT1
GO:0032922	circadian regulation of gene expression	38	2	0.32	183	0.03958	0.03958	1	1	Any process that modulates the frequency, rate or extent of gene expression such that an expression pattern recurs with a regularity of approximately 24 hours	0.641822	-0.285538	PPP1CB, CLOCK, LGR4, ZFHX3, PPP1CC, SIRT1, TOP1, AHR, NCOA2	ID2, MTA1
GO:0043627	response to estrogen	38	2	0.32	184	0.03958	0.03958	1	1	Any process that results in a change in state or activity of a cell or an organism (in terms of movement, secretion, enzyme production, gene expression, etc.) as a result of stimulus by an estrogen, C18 steroid hormones that can stimulate the development of female sexual characteristics	0.492804	-0.344946	ARPC1B, TRIM24, CD24, RGS9, BRCA1, CTNNA1	HMOX1, IGFBP2
GO:0051054	positive regulation of DNA metabolic pro...	155	4	1.29	1722	0.03986	0.69772	1	1	Any process that activates or increases the frequency, rate or extent of the chemical reactions and pathways involving DNA	0.71599	-0.490608	DSCC1, NEK7, TNKS2, ATM, KLF4, CDK1, DNA2, PDGFC, SIRT1, TOP2A, CTNNB1, RFC3, PTGES3, NBN, UBE2N, CDC7, BRCA1, BRCC3	SLX4, E2F8, MRNIP, SRC, RTEL1, PNKP, TMEM161A, GLI2
GO:0098781	ncRNA transcription	91	3	0.76	185	0.03988	0.03988	1	1		0.498344	-0.332492	INTS2, GTF2A1, ZC3H8, RPRD1A, PHAX, GTF2F2, POLR2K, GTF2A2, NOL11, CCNT2, NIFK, TAF8, RPRD1B	BRF1, SNAPC4
GO:0044260	cellular macromolecule metabolic process	5074	50	42.21	1603	0.03992	0.59069	1	1	The chemical reactions and pathways involving macromolecules, any molecule of high relative molecular mass, the structure of which essentially comprises the multiple repetition of units derived, actually or conceptually, from molecules of low relative molecular mass, as carried out by individual cells	1.1725	-1.54543	UFL1, LIN9, PRKAR2B, IL1RAP, SMAD5, SERP1, PRKAA1, PKN2, ASCC3, CRIM1, PPP1CB, SH3D19, ATAD2B, GDF6, CUL5, PTPRG, DDX20, PRPF39, STRN3, CHML, UBE2D2, WWTR1, PDP1, DCUN1D4, MBNL2, SECISBP2L, TIPRL, ADAM9, QKI, TGFBR1, DSCC1, GTF2H2, KLHL15, TRMT13, KLF5, NMD3, CLOCK, MAP3K1, ZRANB2, HOXA3, ZDHHC20, XPO1, RNF11, POGLUT1, STAM, BNIP3L, UHMK1, CDK5R1, GIGYF2, DNAAF4, ATF2, PRPF38B, AGL, UBE2J1, TRNT1…	CRYAB, HTRA1, SPP1, FZD5, HOXB9, HMOX1, AURKC, GRWD1, MIER3, LZTS1, CDK11A, NEIL1, GRIN2D, DYRK1B, ZNF41, ZNF17, TNFRSF19, B3GNT3, ADAMTSL4, ZNF512B, CSF1, ASB16, EHD3, OMA1, TRPM4, PIF1, IGFBP2, CRTC1, B3GNT9, LCMT2, ZNF777, WDR4, PILRB, ZNF219, ZBTB7A, ZNF480, WASL, SLX4, ZNF85, PPIL2, ZNF446, MAN2A2, RIOX1, ZNF16, EFEMP1, MAP3K10, EOGT, ABCA7, RNF2, RRP7BP, MAP3K9, TYRO3, MAN2B1, MTREX, ZBTB45…
GO:0061458	reproductive system development	228	5	1.9	504	0.04089	0.11569	1	1	The progression of the reproductive system over time from its formation to the mature structure. The reproductive system consists of the organs that function in reproduction	0.753201	-1.01311	TGFBR1, ASH1L, GJA1, TMED2, ATM, LGR4, FNDC3A, BIRC6, HMGCS1, RBPJ, HIF1A, CDKN1B, KIF18A, PKD2, SIRT1, CTNNB1, BRIP1, H3F3A, PTK2, SENP2, TAF4, CYR61, KLHL26, ADAMTS1, SMAD4, FOXO3, CTNNA1, BPTF, TBX3, WNT5A, STK3, PRDX3	HTRA1, SPP1, FZD5, TYRO3, E2F8, MGST1, ARID4B, SRC, AMH, JUNB, TFEB, KMT2B, ADAM15, SCX, GLI2
GO:0003263	cardioblast proliferation	5	1	0.04	186	0.04092	0.04092	1	1	The multiplication or reproduction of cardioblasts, resulting in the expansion of the population in the heart field. A cardioblast is a cardiac precursor cell. It is a cell that has been committed to a cardiac fate, but will undergo more cell division rather than terminally differentiating	8.33328e-05	8.33328e-05	CTNNB1
GO:0003264	regulation of cardioblast proliferation	5	1	0.04	187	0.04092	0.04092	1	1	Any process that modulates the frequency, rate or extent of cardioblast proliferation. A cardioblast is a cardiac precursor cell. It is a cell that has been committed to a cardiac fate, but will undergo more cell division rather than terminally differentiating	8.33328e-05	8.33328e-05	CTNNB1
GO:0003306	Wnt signaling pathway involved in heart ...	5	1	0.04	2148	0.04092	1	1	1	The series of molecular signals initiated by binding of Wnt protein to a receptor on the surface of the target cell, resulting a change in cell state that contributes to the progression of the heart over time	0.398117	0.398117	RBPJ, CTNNB1, WNT5A
GO:0007440	foregut morphogenesis	5	1	0.04	188	0.04092	0.04092	1	1	The process in which the anatomical structures of the foregut are generated and organized	0.121065	0.121065	CTNNB1, SMAD3
GO:0016264	gap junction assembly	5	1	0.04	189	0.04092	0.04092	1	1	Assembly of gap junctions, which are found in most animal tissues, and serve as direct connections between the cytoplasms of adjacent cells. They provide open channels through the plasma membrane, allowing ions and small molecules (less than approximately a thousand daltons) to diffuse freely between neighboring cells, but preventing the passage of proteins and nucleic acids	0.352927	0.352927	GJA1, CTNNA1
GO:0018158	protein oxidation	5	1	0.04	190	0.04092	0.04092	1	1	The modification of a protein amino acid by oxidation	0.140788	0.140788	PRDX3
GO:0021533	cell differentiation in hindbrain	5	1	0.04	2149	0.04092	1	1	1	The process in which relatively unspecialized cells acquire specialized structural and/or functional features that characterize the mature cells of the hindbrain. Differentiation includes the processes involved in commitment of a cell to a specific fate	0.104032	0.104032	MTPN
GO:0033690	positive regulation of osteoblast prolif...	5	1	0.04	191	0.04092	0.04092	1	1	Any process that activates or increases the rate or extent of osteoblast proliferation	0.0750513	0.0750513	ITGAV, CYR61
GO:0038092	nodal signaling pathway	5	1	0.04	192	0.04092	0.04092	1	1	A series of molecular signals initiated by the binding of a nodal protein to an activin receptor on the surface of a target cell, and ending with regulation of a downstream cellular process, e.g. transcription	0.163295	0.163295	SMAD3
GO:0042791	5S class rRNA transcription from RNA pol...	5	1	0.04	193	0.04092	0.04092	1	1	The synthesis of 5S ribosomal RNA (rRNA), or an equivalent rRNA, from a DNA template by RNA polymerase III (Pol III), originating at a type 1 RNA polymerase III promoter	0.0391055	0.0391055
GO:0042797	tRNA transcription from RNA polymerase I...	5	1	0.04	194	0.04092	0.04092	1	1	The synthesis of transfer RNA (tRNA) from a DNA template by RNA Polymerase III (Pol III), originating at a Pol III promoter	0.0391055	0.0391055
GO:0043587	tongue morphogenesis	5	1	0.04	195	0.04092	0.04092	1	1	The process in which the anatomical structures of the tongue are generated and organized. The tongue is the movable, muscular organ on the floor of the mouth of most vertebrates, in man other mammals is the principal organ of taste, aids in the prehension of food, in swallowing, and in modifying the voice as in speech	0.324933	0.324933	CTNNB1, HOXC13
GO:0044340	canonical Wnt signaling pathway involved...	5	1	0.04	2150	0.04092	1	1	1	The series of molecular signals initiated by binding of a Wnt protein to a frizzled family receptor on the surface of the target cell, followed by propagation of the signal via beta-catenin, and ending with a change in transcription of target genes that contributes to modulating the rate or frequency of cell proliferation	0.160276	0.160276	CTNNB1
GO:0045040	protein import into mitochondrial outer ...	5	1	0.04	2151	0.04092	1	1	1	The process comprising the insertion of proteins from outside the organelle into the mitochondrial outer membrane, mediated by large outer membrane translocase complexes	0.160394	0.160394
GO:0048263	determination of dorsal identity	5	1	0.04	196	0.04092	0.04092	1	1	Determination of the identity of part of an organism or organ where those parts are of the type that occur in the dorsal region. Identity is considered to be the aggregate of characteristics by which a structure is recognized	0.0119726	0.0119726	CTNNB1
GO:0051036	regulation of endosome size	5	1	0.04	197	0.04092	0.04092	1	1	Any process that modulates the volume of an endosome, a membrane-bounded organelle that carries materials newly ingested by endocytosis	0.178102	0.178102	RAB5A, ALS2
GO:0051955	regulation of amino acid transport	5	1	0.04	2152	0.04092	1	1	1	Any process that modulates the frequency, rate or extent of the directed movement of amino acids into, out of or within a cell, or between cells, by means of some agent such as a transporter or pore	0.302726	0.302726	ARL6IP1, STK39, ARL6IP5
GO:0060440	trachea formation	5	1	0.04	198	0.04092	0.04092	1	1	The process pertaining to the initial formation of a trachea from unspecified parts. The process begins with the specific processes that contribute to the appearance of the discrete structure and ends when the trachea is recognizable. The trachea is the portion of the airway that attaches to the bronchi as it branches	0.0193215	0.0193215	CTNNB1
GO:0060789	hair follicle placode formation	5	1	0.04	199	0.04092	0.04092	1	1	The developmental process in which a hair placode forms. An hair follicle placode is a thickening of the ectoderm that will give rise to the hair follicle bud	0.290495	0.290495	CTNNB1
GO:0061196	fungiform papilla development	5	1	0.04	200	0.04092	0.04092	1	1	The progression of the fungiform papilla over time, from its formation to the mature structure. The fungiform papilla is a mushroom-shaped papilla of the tongue	0.258199	0.258199	CTNNB1
GO:0061549	sympathetic ganglion development	5	1	0.04	201	0.04092	0.04092	1	1	The process whose specific outcome is the progression of a sympathetic ganglion over time, from its formation to the mature structure	-0.0286456	-0.0286456	CTNNB1
GO:0071787	endoplasmic reticulum tubular network fo...	5	1	0.04	202	0.04092	0.04092	1	1	The aggregation, arrangement and bonding together of a set of components to form the endoplasmic reticulum (ER) tubular network. The ER tubular network is the ER part that comprises the membranes with high curvature in cross-section	0.197349	0.197349	ARL6IP1
GO:1902992	negative regulation of amyloid precursor...	5	1	0.04	2153	0.04092	1	1	1	Any process that stops, prevents or reduces the frequency, rate or extent of amyloid precursor protein catabolic process	-0.0967395	-0.0967395	PICALM	ABCA7
GO:2000647	negative regulation of stem cell prolife...	5	1	0.04	203	0.04092	0.04092	1	1	Any process that stops, prevents or reduces the frequency, rate or extent of stem cell proliferation	-0.0495531	-0.0495531	SNAI2, CTNNA1	KCTD11
GO:0009058	biosynthetic process	3862	40	32.13	934	0.04094	0.24674	1	1	The chemical reactions and pathways resulting in the formation of substances; typically the energy-requiring part of metabolism in which simpler substances are transformed into more complex ones	1.15912	-1.30011	UFL1, LIN9, IL1RAP, SMAD5, SERP1, PRKAA1, PKN2, ASCC3, PPP1CB, ATAD2B, ACBD3, GDF6, SGMS1, DDX20, STRN3, UBE2D2, WWTR1, PDP1, ETNK1, DCK, SECISBP2L, QKI, TGFBR1, DSCC1, GTF2H2, KLF5, MAT2B, NMD3, CLOCK, ZRANB2, HOXA3, ZDHHC20, XPO1, PPIP5K2, POGLUT1, UHMK1, CDK5R1, GIGYF2, ATF2, AGL, UBE2J1, ASH1L, NUDT21, GALNT7, ZNF618, NEK7, UGDH, RPS6KA3, PIGB, FUBP3, EID1, RMI1, GJA1, TDG, PHIP, MRPS18C, MAP…	HTRA1, SPP1, IGFBP7, FZD5, HOXB9, HMOX1, GRWD1, DAGLA, LTB4R2, MIER3, LZTS1, CDK11A, DYRK1B, ZNF41, ZNF17, B3GNT3, ADAMTSL4, ZNF512B, PIF1, CRTC1, CHCHD10, B3GNT9, LCMT2, ZNF777, PTH1R, ZNF219, GSTM4, ZBTB7A, ZNF480, WASL, SLX4, ZNF85, ZNF446, MAN2A2, RIOX1, ZNF16, EFEMP1, MAP3K10, EOGT, ABCA7, RNF2, MAP3K9, PLTP, ZBTB45, E2F8, MGST1, ISL2, ZNF213, CBFA2T2, FLNA, ARID4B, MNT, MED26, ZNF414, MZF1,…
GO:0000003	reproduction	649	10	5.4	1032	0.04143	0.27427	1	1	The production of new individuals that contain some portion of genetic material inherited from one or more parent organisms	0.980679	-1.16973	SMAD5, AGFG1, DDX20, SPIN4, QKI, TGFBR1, CLIC4, PARP11, CLOCK, UBE2J1, KNL1, ASH1L, GJA1, TMED2, SKIL, PRKAR1A, ATM, ACOX1, LGR4, LEMD3, CCNI, CADM1, EDN1, CDK1, TUBD1, FNDC3A, BIRC6, HMGCS1, RBPJ, HIF1A, ACSL4, CDKN1B, KIF18A, DSG2, PKD2, SIRT1, TOP2A, CTNNB1, BRIP1, DDX6, CCNYL1, TSNAX, CELF1, SLC38A2, RAD21, SPAG9, CCNE2, MSX2, TOB2, SPA17, IFT81, H3F3A, PTK2, CLDN11, DNAJA1, TTC26, KRAS, AFF4…	HTRA1, SPP1, IGFBP7, FZD5, AURKC, CSF1, IGFBP2, SLX4, RNF2, TYRO3, E2F8, MGST1, ARID4B, GGNBP1, TRIM36, AC138696.1, SMAD1, SRC, AMH, SPHK2, TESK1, JUNB, TFEB, KMT2B, ADAM15, ZFP41, TESK2, SBF1, SCX, GLI2, ZNF35, STS, WDR33
GO:0022414	reproductive process	649	10	5.4	1033	0.04143	0.27427	1	1	A biological process that directly contributes to the process of producing new individuals by one or two organisms. The new individuals inherit some proportion of their genetic material from the parent or parents	0.980679	-1.16973	SMAD5, AGFG1, DDX20, SPIN4, QKI, TGFBR1, CLIC4, PARP11, CLOCK, UBE2J1, KNL1, ASH1L, GJA1, TMED2, SKIL, PRKAR1A, ATM, ACOX1, LGR4, LEMD3, CCNI, CADM1, EDN1, CDK1, TUBD1, FNDC3A, BIRC6, HMGCS1, RBPJ, HIF1A, ACSL4, CDKN1B, KIF18A, DSG2, PKD2, SIRT1, TOP2A, CTNNB1, BRIP1, DDX6, CCNYL1, TSNAX, CELF1, SLC38A2, RAD21, SPAG9, CCNE2, MSX2, TOB2, SPA17, IFT81, H3F3A, PTK2, CLDN11, DNAJA1, TTC26, KRAS, AFF4…	HTRA1, SPP1, IGFBP7, FZD5, AURKC, CSF1, IGFBP2, SLX4, RNF2, TYRO3, E2F8, MGST1, ARID4B, GGNBP1, TRIM36, AC138696.1, SMAD1, SRC, AMH, SPHK2, TESK1, JUNB, TFEB, KMT2B, ADAM15, ZFP41, TESK2, SBF1, SCX, GLI2, ZNF35, STS, WDR33
GO:0009798	axis specification	39	2	0.32	204	0.0415	0.0415	1	1	The establishment, maintenance and elaboration of a pattern along a line or around a point	0.457024	-0.415823	TMED2, CTNNB1, SENP2, SMAD4, SKI, TBX3, WNT5A	FZD5, RNF2, PTCH1
GO:2000181	negative regulation of blood vessel morp...	39	2	0.32	205	0.0415	0.0415	1	1	Any process that stops, prevents, or reduces the frequency, rate or extent of blood vessel morphogenesis	0.433781	-0.29861	KLF4, CTNNB1, ROCK1, ROCK2, STAT1
GO:0042981	regulation of apoptotic process	837	12	6.96	1662	0.04229	0.64485	1	1	Any process that modulates the occurrence or rate of cell death by apoptotic process	0.986354	-1.08453	UFL1, PRKAA1, GDF6, DDX20, RASSF3, TGFBR1, BNIP3L, CDK5R1, ATF2, RPS6KA3, PHIP, SKIL, HMGN5, ATM, RARB, EEF2K, EDN1, KLF4, CDK1, CARD8, DDX3X, EEF1E1, BIRC6, TNFAIP8, SKP2, FIGNL1, DLX1, TRIM24, HIF1A, SGK3, REST, ADAM17, FNIP1, CDKN1B, SIRT1, TOP2A, C5AR1, CTNNB1, YWHAG, SOD2, CYP1B1, ROCK1, RB1CC1, ZC3H8, SENP1, GCLC, NET1, OPA1, PRKCI, MSX2, SUDS3, SNAI2, PTK2, HIGD1A, DNAJA1, EIF2AK3, TAF9B, …	CRYAB, OSGIN1, HMOX1, PLEKHG5, ADAMTSL4, CORO1A, OMA1, TNFRSF25, ZNF16, PLEKHF1, MAP3K10, MAP3K9, TYRO3, FLNA, MNT, CD274, YAP1, SRC, CLIP3, PELI3, GAS6, COL18A1, SPHK2, NQO1, ARHGDIA, PLK3, OXR1, ALX3, MEIS3, RABGGTA, TMEM161A, SIN3A, FLT3LG, HIPK3, RBCK1, SCX, GLI2, SCG2, POR
GO:0051336	regulation of hydrolase activity	744	11	6.19	1735	0.04255	0.70719	1	1	Any process that modulates the frequency, rate or extent of hydrolase activity, the catalysis of the hydrolysis of various bonds, e.g. C-O, C-N, C-C, phosphoric anhydride bonds, etc. Hydrolase is the systematic name for any enzyme of EC class 3	0.966611	-0.685964	CRIM1, DENND6A, AGFG1, CHML, TIPRL, ARHGAP12, SRGAP2C, ELMOD2, TRAPPC13, KNL1, FAM13B, RPS6KA3, DENND5B, ARHGAP18, TDG, TMED2, TOR1AIP2, SH3RF2, KLF4, TBC1D9, CARD8, RALGPS2, DDX3X, RASA2, BIRC6, TNFAIP8, PPP1R2, RICTOR, REST, AJUBA, PSPN, FNIP1, CDKN1B, PICALM, EPHA4, TAX1BP3, SIRT1, TFPI, C5AR1, FGF2, OPHN1, ROCK1, PPP1R12A, SIPA1L2, SENP1, NET1, RAB3GAP2, IRS1, PTK2, RGS9, DNAJA1, EIF2AK3, BAG…	PLEKHG5, NEIL1, GRIN2D, STMN3, WDR81, PLXNB3, TBC1D3L, DEPDC5, RABGAP1L, WFIKKN1, LMTK3, SRC, DLG3, RGS3, RALGDS, GAS6, AXIN1, GBF1, ARHGDIA, TRAPPC9, ARHGAP45, RASGRF1, ARAP1, AGRN, SBF1, MYO9A, SRGAP1, VPS9D1, POR
GO:0010604	positive regulation of macromolecule met...	1743	21	14.5	1685	0.04294	0.66685	1	1	Any process that increases the frequency, rate or extent of the chemical reactions and pathways involving macromolecules, any molecule of high relative molecular mass, the structure of which essentially comprises the multiple repetition of units derived, actually or conceptually, from molecules of low relative molecular mass	1.09303	-0.992248	PRKAR2B, SMAD5, SERP1, PRKAA1, SH3D19, ATAD2B, GDF6, WWTR1, DCUN1D4, ADAM9, QKI, TGFBR1, DSCC1, KLF5, NMD3, CLOCK, MAP3K1, UHMK1, CDK5R1, ATF2, ASH1L, NEK7, RPS6KA3, FUBP3, GJA1, TMED2, PHIP, MAP3K2, RBMS3, MED13, MAP4K5, NUFIP1, TNKS2, PRKAR1A, OSBPL8, HMGN5, CDH2, ATM, FOSL2, ARMCX3, CAND1, RNF6, LGR4, MAP4K3, RARB, BACH1, MYBL1, TAF1A, FLI1, EDN1, KLF4, PRDM2, CDK1, CARD8, BMI1, NR1D2, ATXN7, …	SPP1, FZD5, HOXB9, HMOX1, DYRK1B, TNFRSF19, CSF1, CRTC1, PILRB, SLX4, ACTA2, MAP3K10, ABCA7, MAP3K9, E2F8, ARID4B, MZF1, PTCH1, ITGB3, NRF1, YAP1, MRNIP, ZNF567, SMAD1, SRC, CLIP3, MED25, ID2, ZEB1, AMH, GAS6, ZKSCAN3, BRF1, RTEL1, CARM1, JUNB, TMEM259, TFEB, AXIN1, IL6R, KMT2B, IKBKG, CEBPD, PLK3, ENPP2, CAMKK1, MYO6, PNKP, AMER1, MEIS3, PIAS2, DBP, TMEM161A, MTA1, SIN3A, FLT3LG, CLSPN, CD34, DH…
GO:0043624	cellular protein complex disassembly	159	4	1.32	1160	0.04311	0.32618	1	1	The disaggregation of a protein complex into its constituent components, occurring at the level of an individual cell. Protein complexes may have other associated non-protein prosthetic groups, such as nucleic acids, metal ions or carbohydrate groups	0.577556	-0.360625	MRPS18C, DNAJC6, KIF18A, MTPN, MRPL33, VPS4B, CAPZA1, PTCD3, MRPL30, MRPL35, NAPB, MRPL47, ABCE1	STMN3, TMOD1
GO:0051168	nuclear export	159	4	1.32	206	0.04311	0.04311	1	1	The directed movement of substances out of the nucleus	0.722151	-0.354886	AGFG1, NMD3, XPO1, UHMK1, CTDSPL2, NUP58, RIOK2, THOC7, SRSF1, PHAX, KHDRBS1, SOX4, MAGOHB, NUP160, RANBP1, STRADB, NUP155, ABCE1	GAS6, WDR33
GO:0030029	actin filament-based process	392	7	3.26	765	0.04375	0.18985	1	1	Any cellular process that depends upon or alters the actin cytoskeleton, that part of the cytoskeleton comprising actin filaments and their associated proteins	0.874698	-0.581074	PHLDB2, COBLL1, TGFBR1, MAP3K1, ARPC1B, CDK5R1, ARHGAP18, GJA1, ARF6, MAP3K2, PRKAR1A, GMFB, EDN1, SSH2, MYO1B, DSC2, CORO2A, RICTOR, PARVA, CD2AP, MARCKS, ARPC5, GAS2L3, DSG2, MTPN, MYPN, MYO5A, OPHN1, ROCK1, PRKCI, PLS3, CAPZA1, ARFIP1, KRAS, EPB41L2, FCHSD2, BAG4, PRKCE, PRKG1, FER, RACGAP1, ROCK2, SMAD3, PDCD6IP, SMAD4, EPB41L4A, CTNNA1, ABI2, CNN3, MYOM2, TRIM32, TTC17, NUP155	CORO1A, TRPM4, WASL, FLNA, MKLN1, SRC, INF2, TMOD1, ATP2C1, ARHGDIA, SCN1B, MYO6, ALMS1, FHOD3, TESK2, ARAP1
GO:0022613	ribonucleoprotein complex biogenesis	393	7	3.27	207	0.04425	0.04425	1	1	A cellular process that results in the biosynthesis of constituent macromolecules, assembly, and arrangement of constituent parts of a complex containing RNA and proteins. Includes the biosynthesis of the constituent RNA and protein molecules, and those macromolecular modifications that are involved in synthesis or assembly of the ribonucleoprotein complex	0.873121	-0.462724	G3BP2, DDX20, PRPF39, NMD3, XPO1, ERI2, NUFIP1, ATM, C1D, DDX3X, PSIP1, RIOK2, SIRT1, PTBP2, HEATR3, UTP23, RPL21, DDX6, AGO2, CELF1, WDR43, DENR, SRSF1, PTGES3, YTHDC1, PAN3, CDC73, SNRPE, RPS3A, RPS25, RBM22, RPF1, NOL11, PA2G4, CNOT6, ABCE1, ERI1	RRP7BP, MTREX, EMG1, SRPK3, TBL3, GNL3L
GO:0051216	cartilage development	95	3	0.79	208	0.04439	0.04439	1	1	The process whose specific outcome is the progression of a cartilage element over time, from its formation to the mature structure. Cartilage elements are skeletal elements that consist of connective tissue dominated by extracellular matrix containing collagen type II and large amounts of proteoglycan, particularly chondroitin sulfate	0.792604	-0.494058	SMAD5, GDF6, TGFBR1, HOXA3, RARB, EDN1, NFIB, HIF1A, FGF2, CTNNB1, MSX2, SNAI2, EIF2AK3, SMAD3, CYR61, WNT5A, RUNX2	PTH1R, EFEMP1, SMAD1, ZEB1, CARM1, COL11A1, SCX, GLI2, POR
GO:0031623	receptor internalization	41	2	0.34	210	0.04544	0.04544	1	1	A receptor-mediated endocytosis process that results in the movement of receptors from the plasma membrane to the inside of the cell. The process begins when cell surface receptors are monoubiquitinated following ligand-induced activation. Receptors are subsequently taken up into endocytic vesicles from where they are either targeted to the lysosome or vacuole for degradation or recycled back to …	0.472548	-0.257553	GTF2H2, RAB5A, PICALM	RAB31
GO:0032272	negative regulation of protein polymeriz...	41	2	0.34	2154	0.04544	1	1	1	Any process that stops, prevents, or reduces the frequency, rate or extent of the process of creating protein polymers	0.328212	-0.31132	MTPN, CAPZA1	CLIP3, TMOD1, FHOD3
GO:1901343	negative regulation of vasculature devel...	41	2	0.34	211	0.04544	0.04544	1	1	Any process that stops, prevents or reduces the frequency, rate or extent of vasculature development	0.433781	-0.318011	KLF4, CTNNB1, ROCK1, ROCK2, STAT1
GO:0030278	regulation of ossification	96	3	0.8	2155	0.04556	1	1	1	Any process that modulates the frequency, rate or extent of bone formation	0.602181	-0.58221	SMAD5, RBPJ, HIF1A, CTNNB1, MSX2, TOB2, SNAI2, PTK2, SUCO, TOB1, SMAD3, CYR61, SKI, WNT5A, RUNX2	CSF1, KREMEN2, TRPM4, RIOX1, PTCH1, SMAD1, ID2, IL6R, CEBPD, PIAS2, CTNNBIP1, ANKH, ISG15
GO:0030324	lung development	96	3	0.8	739	0.04556	0.18311	1	1	The process whose specific outcome is the progression of the lung over time, from its formation to the mature structure. In all air-breathing vertebrates the lungs are developed from the ventral wall of the oesophagus as a pouch which divides into two sacs. In amphibians and many reptiles the lungs retain very nearly this primitive sac-like character, but in the higher forms the connection with t…	0.539314	-0.412466	RBPJ, LOX, NFIB, CRISPLD2, HEG1, CTNNB1, KRAS, WNT5A	SEC24B, LAMA5, YAP1, GLI2
GO:0043067	regulation of programmed cell death	848	12	7.05	1673	0.04601	0.65849	1	1	Any process that modulates the frequency, rate or extent of programmed cell death, cell death resulting from activation of endogenous cellular processes	0.986354	-1.08453	UFL1, PRKAA1, GDF6, DDX20, RASSF3, TGFBR1, BNIP3L, CDK5R1, ATF2, RPS6KA3, PHIP, SKIL, HMGN5, ATM, RARB, EEF2K, EDN1, KLF4, CDK1, CARD8, DDX3X, EEF1E1, BIRC6, TNFAIP8, SKP2, FIGNL1, DLX1, TRIM24, HIF1A, SGK3, REST, ADAM17, FNIP1, CDKN1B, SIRT1, TOP2A, C5AR1, CTNNB1, YWHAG, SOD2, CYP1B1, ROCK1, RB1CC1, ZC3H8, SENP1, GCLC, NET1, OPA1, PRKCI, MSX2, SUDS3, SNAI2, PTK2, HIGD1A, DNAJA1, EIF2AK3, TAF9B, …	CRYAB, OSGIN1, HMOX1, PLEKHG5, ADAMTSL4, CORO1A, OMA1, TNFRSF25, ZNF16, PLEKHF1, MAP3K10, MAP3K9, TYRO3, FLNA, MNT, CD274, YAP1, SRC, CLIP3, PELI3, GAS6, COL18A1, SPHK2, NQO1, ARHGDIA, PLK3, OXR1, ALX3, MEIS3, RABGGTA, TMEM161A, SIN3A, FLT3LG, HIPK3, RBCK1, SCX, GLI2, SCG2, POR
GO:0006353	DNA-templated transcription, termination	97	3	0.81	212	0.04674	0.04674	1	1	The cellular process that completes DNA-templated transcription; the formation of phosphodiester bonds ceases, the RNA-DNA hybrid dissociates, and RNA polymerase releases the DNA	0.591088	-0.241579	GTF2H2, NUDT21, TAF1A, MTERF1, THOC7, SRSF1, MAGOHB, LSM11, PAPOLA, SNRPE, POLR2K	WDR33
GO:0003006	developmental process involved in reprod...	316	6	2.63	1542	0.04718	0.5492	1	1	A developmental process in which a progressive change in the state of some part of an organism specifically contributes to its ability to form offspring	0.932549	-1.08863	SMAD5, AGFG1, DDX20, QKI, TGFBR1, UBE2J1, KNL1, ASH1L, GJA1, TMED2, ATM, LGR4, FNDC3A, BIRC6, HMGCS1, RBPJ, HIF1A, CDKN1B, KIF18A, PKD2, SIRT1, CTNNB1, BRIP1, CELF1, H3F3A, PTK2, TTC26, AFF4, SENP2, TAF4, CYR61, KLHL26, ADAMTS1, SMAD4, FOXO3, CTNNA1, BPTF, TBX3, WNT5A, STK3, PRDX3	HTRA1, SPP1, FZD5, AURKC, CSF1, RNF2, TYRO3, E2F8, MGST1, ARID4B, SRC, AMH, JUNB, TFEB, KMT2B, ADAM15, SCX, GLI2
GO:0046605	regulation of centrosome cycle	42	2	0.35	213	0.04746	0.04746	1	1	Any process that modulates the frequency, rate or extent of the centrosome cycle, the processes of centrosome duplication and separation	0.517319	-0.141937	XPO1, CHORDC1, VPS4B, GEN1, ROCK2, PDCD6IP, BRCA1, CHMP2B, RANBP1
GO:0001568	blood vessel development	317	6	2.64	506	0.04779	0.1171	1	1	The process whose specific outcome is the progression of a blood vessel over time, from its formation to the mature structure. The blood vessel is the vasculature carrying blood	0.857073	-0.689981	QKI, TGFBR1, ERAP1, CLIC4, KLF5, HOXA3, TMED2, CDH2, EDN1, KLF4, RBPJ, NUS1, LOX, PARVA, HIF1A, COL3A1, FLVCR1, PKD2, SIRT1, C5AR1, FGF2, HEG1, CTNNB1, CYP1B1, ROCK1, EFNB2, UBP1, PTK2, ANKRD17, EIF2AK3, ITGAV, SOX4, GLMN, AHR, ROCK2, CYR61, BRCA1, TBX3, WNT5A, STAT1	FZD5, HMOX1, SLC12A6, ACTA2, E2F8, SEC24B, LAMA5, ITGB3, YAP1, COL1A2, COL18A1, SPHK2, JUNB, ADAM15, ENPP2, CD34, PRKX, SCG2
GO:0035295	tube development	317	6	2.64	507	0.04779	0.1171	1	1	The process whose specific outcome is the progression of a tube over time, from its initial formation to a mature structure. Epithelial and endothelial tubes transport gases, liquids and cells from one site to another and form the basic structure of many organs and tissues including lung and trachea, kidney, the mammary gland, the vascular system and the gastrointestinal and urinary-genital tracts	0.840344	-0.617261	SMAD5, WWTR1, CLIC4, KLF5, TMED2, LGR4, CLMP, RARB, EDN1, RBPJ, LOX, PDGFC, CPS1, NFIB, HIF1A, CRISPLD2, COL3A1, KIF18A, PKD2, EPHA4, CD24, FGF2, HEG1, CTNNB1, BRIP1, RB1, EFNB2, MSX2, KRAS, SOX4, GLMN, HOXB7, SMAD3, TRAF6, ZEB2, SMAD4, ITGA6, SKI, TBX3, WNT5A, STAT1, STK3	ITGB4, CSF1, CBFA2T2, SEC24B, ADAMTS16, PTCH1, LAMA5, ITGB3, YAP1, SMAD1, SRC, ID2, ZEB1, HLX, VPS52, CTNNBIP1, PRKX, GLI2
GO:0006613	cotranslational protein targeting to mem...	98	3	0.82	214	0.04793	0.04793	1	1	The targeting of proteins to a membrane that occurs during translation. The transport of most secretory proteins, particularly those with more than 100 amino acids, into the endoplasmic reticulum lumen occurs in this manner, as does the import of some proteins into mitochondria	0.517552	-0.234904	TRAM1, SRP9, SEC63, RPL21, ARL6IP1, RPS3A, RPS25
GO:0030041	actin filament polymerization	98	3	0.82	1466	0.04793	0.4927	1	1	Assembly of actin filaments by the addition of actin monomers to a filament	0.704375	-0.440227	COBLL1, ARPC1B, ARHGAP18, ARF6, GMFB, RICTOR, ARPC5, MTPN, CAPZA1, ARFIP1, FCHSD2, BAG4, PRKCE, FER, ABI2, TTC17	CORO1A, WASL, TMOD1, FHOD3
GO:0031099	regeneration	98	3	0.82	764	0.04793	0.18903	1	1	The regrowth of a lost or destroyed body part, such as an organ or tissue	0.531323	-0.641922	KLF4, CDK1, EPHA4, MTPN, C5AR1, PRPS2, SRSF1, CTNNA1	SPP1, HMOX1, GAS6, ADAM15
GO:0048534	hematopoietic or lymphoid organ developm...	401	7	3.34	216	0.04842	0.04842	1	1	The process whose specific outcome is the progression of any organ involved in hematopoiesis (also known as hemopoiesis) or lymphoid cell activation over time, from its formation to the mature structure. Such development includes differentiation of resident cell types (stromal cells) and of migratory cell types dependent on the unique microenvironment afforded by the organ for their proper differ…	0.79582	-0.650042	SMAD5, TGFBR1, HOXA3, ATM, ITGA4, FLI1, KLF4, DUSP10, BMI1, KAT6A, RBPJ, FST, ZNF160, OSTM1, HIF1A, REST, ADAM17, ESCO2, FNIP1, FLVCR1, PICALM, RTKN2, SOCS5, SIRT1, TOP2A, ZNF675, CTNNB1, RB1, ZC3H8, SNRK, ANLN, SENP1, TOB2, AGPAT5, ZFP36L2, SOX4, CDKN2B, HOXB7, JARID2, TRAF6, CDC73, FOXO3, ETV6, PGM3, CD46, PTBP3, KLF6, WNT5A, RUNX2, CBFB, STK3, PRDX3, ZBTB24	FZD5, GPR68, CSF1, ZNF16, TYRO3, SRC, ID2, ZEB1, GAS6, JUNB, POLM, HLX, CD83, CEBPD, SIN3A, FLT3LG, CD34, CTNNBIP1, PRKX, ZBTB7B, GLI2, PIR, ISG15
GO:0043066	negative regulation of apoptotic process	488	8	4.06	1399	0.04884	0.45512	1	1	Any process that stops, prevents, or reduces the frequency, rate or extent of cell death by apoptotic process	0.875533	-0.945246	UFL1, PRKAA1, TGFBR1, BNIP3L, RPS6KA3, PHIP, HMGN5, RARB, EEF2K, EDN1, KLF4, CDK1, DDX3X, BIRC6, TNFAIP8, FIGNL1, DLX1, HIF1A, FNIP1, CDKN1B, SIRT1, C5AR1, CTNNB1, SOD2, ROCK1, RB1CC1, GCLC, OPA1, PRKCI, MSX2, SNAI2, PTK2, HIGD1A, DNAJA1, TAF9B, KRAS, ITGAV, BAG4, ARL6IP1, URI1, SH3RF1, SMAD3, CYR61, TRAF6, CDC73, ITGA6, BRCA1, RPS3A, CTNNA1, TBX3, F2R, ZPR1, TRIM32, WNT5A, PA2G4, BECN1, STRADB, …	CRYAB, HMOX1, CORO1A, ZNF16, TYRO3, FLNA, MNT, YAP1, SRC, PELI3, GAS6, SPHK2, NQO1, ARHGDIA, PLK3, OXR1, MEIS3, TMEM161A, SIN3A, FLT3LG, HIPK3, SCX, GLI2, SCG2, POR
GO:0000056	ribosomal small subunit export from nucl...	6	1	0.05	217	0.0489	0.0489	1	1	The directed movement of a ribosomal small subunit from the nucleus into the cytoplasm	0.258368	0.258368	XPO1, RIOK2
GO:0007008	outer mitochondrial membrane organizatio...	6	1	0.05	2156	0.0489	1	1	1	A process that is carried out at the cellular level which results in the assembly, arrangement of constituent parts, or disassembly of the mitochondrial outer membrane	0.176087	0.176087
GO:0009304	tRNA transcription	6	1	0.05	218	0.0489	0.0489	1	1	The synthesis of transfer RNA (tRNA) from a DNA template	-0.0511939	-0.0511939		BRF1
GO:0021697	cerebellar cortex formation	6	1	0.05	2157	0.0489	1	1	1	The process that gives rise to the cerebellar cortex. This process pertains to the initial formation of a structure from unspecified parts. The cerebellar cortex is a thin mantle of gray matter that covers the surface of each cerebral hemisphere. It has a characteristic morphology with convolutions (gyri) and crevices (sulci) that have specific functions. Six layers of nerve cells and the nerve p…	0.0338313	0.0338313	MTPN
GO:0030325	adrenal gland development	6	1	0.05	2158	0.0489	1	1	1	The process whose specific outcome is the progression of the adrenal gland over time, from its formation to the mature structure. This gland can either be a discrete structure located bilaterally above each kidney, or a cluster of cells in the head kidney that perform the functions of the adrenal gland. In either case, this organ consists of two cells types, aminergic chromaffin cells and steroid…	-0.122778	-0.122778
GO:0033234	negative regulation of protein sumoylati...	6	1	0.05	219	0.0489	0.0489	1	1	Any process that stops, prevents, or reduces the frequency, rate or extent of the addition of SUMO groups to a protein	0.07398	0.07398	CTNNB1	GNL3L
GO:0035358	regulation of peroxisome proliferator ac...	6	1	0.05	220	0.0489	0.0489	1	1	Any process that modulates the frequency, rate or extent of the peroxisome proliferator activated receptor signaling pathway	0.158112	0.158112	SIRT1
GO:0039692	single stranded viral RNA replication vi...	6	1	0.05	2159	0.0489	1	1	1	A viral genome replication where the template is single-stranded RNA (ssRNA), and which proceeds via a double stranded DNA (dsDNA) intermediate molecule. Viral genomic RNA is first reverse transcribed into dsDNA, which integrates into the host chromosomal DNA, where it is transcribed by host RNA polymerase II	-0.0261374	-0.0261374	TOP2A
GO:0042256	mature ribosome assembly	6	1	0.05	221	0.0489	0.0489	1	1	The aggregation, arrangement and bonding together of the large and small ribosomal subunits into a functional ribosome	0.0877284	0.0877284	DDX3X
GO:0044851	hair cycle phase	6	1	0.05	222	0.0489	0.0489	1	1	The cyclical periods of growth (anagen), regression (catagen), quiescence (telogen), and shedding (exogen) in the life of a hair; one of the collection or mass of filaments growing from the skin of an animal, and forming a covering for a part of the head or for any part or the whole of the body	0.40488	0.40488	CTNNB1, MSX2, CDH3, WNT5A
GO:0045603	positive regulation of endothelial cell ...	6	1	0.05	223	0.0489	0.0489	1	1	Any process that activates or increases the frequency, rate or extent of endothelial cell differentiation	0.0205051	0.0205051	CTNNB1
GO:0048262	determination of dorsal/ventral asymmetr...	6	1	0.05	224	0.0489	0.0489	1	1	Determination of asymmetry from the dorsal to the ventral side; as, the dorsoventral axis	-0.0306093	-0.0306093	CTNNB1
GO:0048368	lateral mesoderm development	6	1	0.05	225	0.0489	0.0489	1	1	The process whose specific outcome is the progression of the lateral mesoderm over time, from its formation to the mature structure	-0.106338	-0.106338		YAP1
GO:0048819	regulation of hair follicle maturation	6	1	0.05	226	0.0489	0.0489	1	1	Any process that modulates the frequency, rate or extent of hair follicle maturation	0.40488	0.40488	CTNNB1, MSX2, CDH3, WNT5A
GO:0051176	positive regulation of sulfur metabolic ...	6	1	0.05	227	0.0489	0.0489	1	1	Any process that activates or increases the frequency, rate or extent of the chemical reactions and pathways involving sulfur or compounds containing sulfur	0.135727	0.135727	CTNNB1
GO:0060033	anatomical structure regression	6	1	0.05	228	0.0489	0.0489	1	1	The developmental process in which an anatomical stucture is destroyed as a part of its normal progression	-0.0663581	-0.0663581	SMAD5	AMH, GLI2
GO:0060439	trachea morphogenesis	6	1	0.05	229	0.0489	0.0489	1	1	The process in which a trachea is generated and organized. The trachea is the portion of the airway that attaches to the bronchi as it branches	0.0494017	0.0494017	CTNNB1
GO:0060856	establishment of blood-brain barrier	6	1	0.05	230	0.0489	0.0489	1	1	Establishment of the barrier between the blood and the brain. The cells in the brain are packed tightly together preventing the passage of most molecules from the blood into the brain. Only lipid soluble molecules or those that are actively transported can pass through the blood-brain barrier	0.00166676	0.00166676	CTNNB1
GO:0071670	smooth muscle cell chemotaxis	6	1	0.05	231	0.0489	0.0489	1	1	The directed movement of a smooth muscle cell in response to an external stimulus	0.111346	0.111346	PARVA
GO:0090185	negative regulation of kidney developmen...	6	1	0.05	232	0.0489	0.0489	1	1	Any process that decreases the rate, frequency or extent of kidney development. Kidney development is the process whose specific outcome is the progression of the kidney over time, from its formation to the mature structure. The kidney is an organ that filters the blood and excretes the end products of body metabolism in the form of urine	0.0982119	0.0982119	CTNNB1, STAT1
GO:1902003	regulation of beta-amyloid formation	6	1	0.05	233	0.0489	0.0489	1	1	Any process that modulates the frequency, rate or extent of beta-amyloid formation	-0.0282013	-0.0282013	PICALM	ABCA7
GO:1902916	positive regulation of protein polyubiqu...	6	1	0.05	234	0.0489	0.0489	1	1	Any process that activates or increases the frequency, rate or extent of protein polyubiquitination	0.236647	0.236647	SKP2
GO:1903332	regulation of protein folding	6	1	0.05	2160	0.0489	1	1	1	Any process that modulates the frequency, rate or extent of protein folding	0.020384	0.020384
GO:1990403	embryonic brain development	6	1	0.05	235	0.0489	0.0489	1	1	The process occurring during the embryonic phase whose specific outcome is the progression of the brain over time, from its formation to the mature structure	0.0741911	0.0741911	CTNNB1
GO:2000601	positive regulation of Arp2/3 complex-me...	6	1	0.05	236	0.0489	0.0489	1	1	Any process that activates or increases the frequency, rate or extent of Arp2/3 complex-mediated actin nucleation	0.0663996	0.0663996	ABI2	WASL
GO:0043623	cellular protein complex assembly	402	7	3.34	1850	0.04896	0.80137	1	1	The aggregation, arrangement and bonding together of a set of components to form a protein complex, occurring at the level of an individual cell	0.853022	-0.568886	SLAIN2, COBLL1, ARPC1B, MZT1, DNAAF4, ARHGAP18, ARF6, CAND1, GMFB, TMEM33, DNAAF2, TBCA, PDGFC, RICTOR, ARPC5, CDKN1B, PICALM, IMMP1L, MTPN, PIK3C2A, VBP1, TFAM, ANLN, OPA1, CAPZA1, PTK2, ARFIP1, PTGES3, FCHSD2, BAG4, PRKCE, FER, SMAD3, COX11, SMAD4, RALB, NIN, VAMP7, ABI2, NDUFAF2, MYOM2, RANBP9, TTC17, ARMC4, NDUFAF7	CORO1A, PILRB, WASL, SMAD1, SRC, CLIP3, MED25, TMOD1, AXIN1, FHOD3, NDUFS7, STX1B
GO:0030323	respiratory tube development	99	3	0.82	770	0.04915	0.192	1	1	The process whose specific outcome is the progression of the respiratory tube over time, from its formation to the mature structure. The respiratory tube is assumed to mean any tube in the respiratory tract	0.539314	-0.412466	RBPJ, LOX, NFIB, CRISPLD2, HEG1, CTNNB1, KRAS, WNT5A	SEC24B, LAMA5, YAP1, GLI2

## Sheet: top 250 upreg
GO id	Term	Genes in genome (background)	Genes in top-250 upreg	Expected genes in top-250 upreg	Rank in P.Fisher.elim	P.Fisher	P.Fisher.elim	FDR.Fisher	FDR.Fisher.elim	Description	Avg.LogFC for top-10 upreg	Avg.LogFC for top-10 downreg	Upreg genes (LogFC > 0.4)	Downreg genes (LogFC < -0.4)
GO:0007010	cytoskeleton organization	741	41	18.83	21	1.3e-06	0.00364	0.01	0.985882	A process that is carried out at the cellular level which results in the assembly, arrangement of constituent parts, or disassembly of cytoskeletal structures	0.989582	-0.963734	SLAIN2, AGFG1, SH3D19, PHLDB2, COBLL1, TGFBR1, CLIC4, MAP3K1, ARPC1B, XPO1, MZT1, SRGAP2C, CDK5R1, DNAAF4, CEP126, NEK7, ARHGAP18, PHIP, ARF6, MAP3K2, SASS6, PRKAR1A, GMFB, HOOK3, CHORDC1, EDN1, CDK1, SLC16A1, SSH2, TUBD1, ATXN7, DNAAF2, MYO1B, USP33, FIGNL1, CORO2A, RICTOR, PARVA, CD2AP, MARCKS, ARPC5, AJUBA, PCLAF, GAS2L3, CDKN1B, KIF18A, ADD3, PKD2, MTPN, MYPN, DPYSL2, CTNNB1, TUBB2A, VPS4B, O…	CRYAB, AURKC, STMN3, CORO1A, WASL, FLNA, LAMA5, MKLN1, SRC, CLIP3, INF2, TMOD1, ATP2C1, ABRAXAS2, AXIN1, WDR62, ARHGDIA, PLK3, MAP2, ALMS1, FHOD3, TESK2, GAS8, ARAP1, AGRN, PARD6A, BRSK1
GO:0034248	regulation of cellular amide metabolic p...	299	23	7.6	814	2e-06	0.09656	0.01	1	Any process that modulates the frequency, rate or extent of the chemical reactions and pathways involving amides	0.893677	-0.424173	SERP1, PRKAA1, SECISBP2L, QKI, UHMK1, GIGYF2, RPS6KA3, RBMS3, SRP9, DDX3X, IREB2, AJUBA, CNOT8, PICALM, MTPN, DDX6, AGO2, CELF1, EIF4G3, PTCD3, FXR1, EIF2AK3, KHDRBS1, ZFP36L2, SOX4, TOB1, SMAD3, CYR61, EIF2S1, LARP4, FOXO3, SAMD8, TRMT10C, IGF2BP3, TNRC6B, PA2G4, CNOT6	ABCA7, SMAD1, PLK3
GO:0034249	negative regulation of cellular amide me...	128	14	3.25	4004	4.2e-06	1	0.014	1	Any process that stops, prevents, or reduces the frequency, rate or extent of the chemical reactions and pathways involving amides	0.725275	-0.404802	PRKAA1, QKI, GIGYF2, SRP9, DDX3X, IREB2, AJUBA, CNOT8, AGO2, CELF1, FXR1, EIF2AK3, ZFP36L2, TOB1, SMAD3, EIF2S1, IGF2BP3, TNRC6B, CNOT6	ABCA7, SMAD1
GO:0022402	cell cycle process	1006	48	25.57	144	9.6e-06	0.02367	0.024	0.985882	The cellular process that ensures successive accurate and complete genome replication and chromosome segregation	1.03313	-0.688508	PRKAR2B, PRKAA1, PKN2, PPP1CB, CUL5, CENPQ, TGFBR1, DSCC1, XPO1, MZT1, UHMK1, CDK5R1, GIGYF2, ATF2, CEP126, KNL1, NEK7, CCNG1, PHIP, SKIL, SASS6, PRKAR1A, HMGN5, ATM, LEMD3, CHAMP1, BACH1, CHORDC1, EDN1, CDK1, ZFHX3, DDX3X, DNA2, BIRC6, USP33, SKP2, PPP1CC, NAA50, TOPBP1, FOXN3, CUL4B, CD2AP, AJUBA, NPAT, LRRCC1, ADAM17, NUP58, CDKN1B, CNOT8, KIF18A, PKD2, TOP2A, RINT1, CTNNB1, BRIP1, YWHAG, RB1,…	AURKC, LZTS1, CDK11A, WASL, SLX4, ZNF16, E2F8, FLNA, MRNIP, GAS2L1, MED25, FSD1, ID2, GAS6, FBXL15, RTEL1, CARM1, ABRAXAS2, ZFYVE26, WDR62, PLK3, ALMS1, SIN3A, INCENP, CLSPN, NEDD1, ARAP1, BRSK1, XPC
GO:0007049	cell cycle	1283	56	32.61	3057	2.1e-05	0.55489	0.04	1	The progression of biochemical and morphological phases and events that occur in a cell during successive cell replication or nuclear replication events. Canonically, the cell cycle comprises the replication and segregation of genetic material followed by the division of the cell, but in endocycles or syncytial cells nuclear replication or nuclear division may not be followed by cell division	1.07734	-0.700393	LIN9, PRKAR2B, PRKAA1, PKN2, PPP1CB, CUL5, CENPQ, TIPRL, TGFBR1, DSCC1, CLOCK, XPO1, MZT1, UHMK1, CDK5R1, GIGYF2, ATF2, CEP126, KNL1, NEK7, RPS6KA3, EID1, CCNG1, PHIP, ARF6, SKIL, SASS6, PRKAR1A, HMGN5, ATM, LEMD3, CHAMP1, BACH1, CCNI, MYBL1, CHORDC1, EDN1, CDK1, PTP4A1, ZFHX3, DDX3X, DNA2, BIRC6, USP33, SKP2, CDK15, FIGNL1, PPP1CC, NAA50, TOPBP1, FOXN3, CDK8, CUL4B, CCNC, CD2AP, AJUBA, NPAT, LRR…	AURKC, LZTS1, CDK11A, WASL, SLX4, ZNF16, RNF2, E2F8, FLNA, MNT, LIN37, PTCH1, TMEM8B, TRIM36, MRNIP, GAS2L1, SRC, MED25, FSD1, ID2, SEPT1, GAS6, FBXL15, RTEL1, CARM1, ABRAXAS2, ZFYVE26, JUNB, GBF1, WDR62, PLK3, ALMS1, SIN3A, FLT3LG, INCENP, DMTF1, CLSPN, NEDD1, ARAP1, KCTD11, PARD6A, BRSK1, XPC
GO:0043604	amide biosynthetic process	585	32	14.87	937	2.9e-05	0.11541	0.04	1	The chemical reactions and pathways resulting in the formation of an amide, any derivative of an oxoacid in which an acidic hydroxy group has been replaced by an amino or substituted amino group	0.955125	-0.405479	SERP1, PRKAA1, SGMS1, SECISBP2L, QKI, GTF2H2, UHMK1, GIGYF2, RPS6KA3, MRPS18C, RBMS3, UGCG, SRP9, EEF2K, DDX3X, EEF1E1, CPS1, RPL22L1, IREB2, AJUBA, CNOT8, MTPN, RPL21, MRPL33, DDX6, AGO2, CELF1, GCLC, EIF4G3, DENR, PTCD3, CHAC2, FXR1, EIF2AK3, KHDRBS1, GFM1, ZFP36L2, SOX4, MRPL30, MRPL35, TOB1, SMAD3, CYR61, EIF2S1, LARP4, GUF1, FOXO3, GGCT, RPS3A, SAMD8, TRMT10C, IGF2BP3, RPS25, MRPL47, TNRC6B,…	SMAD1, AASDH
GO:0060341	regulation of cellular localization	532	30	13.52	323	3e-05	0.03934	0.04	0.985882	Any process that modulates the frequency, rate or extent of a process in which a cell, a substance, or a cellular entity is transported to, or maintained in a specific location within or in the membrane of a cell	0.936932	-1.07659	G3BP2, CENPQ, WWTR1, TGFBR1, NMD3, XPO1, BNIP3L, UHMK1, CDK5R1, UBE2J1, ERLEC1, ARF6, CDH2, UGCG, KIF5B, RAB5A, CTDSPL2, TRPC1, CDK1, C2CD5, NUS1, PPP1CC, CD2AP, HIF1A, STX6, NUP58, RIOK2, PKD2, TAX1BP3, SIRT1, RINT1, CTNNB1, YWHAG, RB1, MYO5A, PPP1R12A, CCNE2, PRKCI, SNAI2, FBXW11, DNAJA1, EIF2AK3, KHDRBS1, BAG4, PRKCE, SOX4, FER, SMAD3, HMGN3, SMAD4, OSCP1, CDH3, PBLD, GBP1, NDC80, CRIPT, RALB,…	CRYAB, FZD5, CNIH2, HMOX1, GPR68, CORO1A, TRPM4, SEC24B, FLNA, PRELID3A, SRC, CLIP3, GAS6, GBF1, SLC30A1, PLK3, GNL3L, LYPLA1, TONSL, SIN3A, STX1B, RBCK1, PARD6A, GLIS2
GO:0034332	adherens junction organization	80	10	2.03	5	3.2e-05	0.00106	0.04	0.985882	A process that is carried out at the cellular level which results in the assembly, arrangement of constituent parts, or disassembly of an adherens junction. An adherens junction is a cell junction at which the cytoplasmic face of the plasma membrane is attached to actin filaments	0.647084	-0.439539	PHLDB2, RAB8B, CDH2, CADM1, AJUBA, CTNNB1, ROCK1, CTNND1, PTK2, CDH12, PTPRK, ROCK2, SMAD3, CDH3, CTNNA1	NECTIN1, LAMA5, SRC, TESK2
GO:0098813	nuclear chromosome segregation	219	17	5.57	507	4e-05	0.05071	0.043	0.985882		0.782278	-0.424137	CENPQ, DSCC1, XPO1, KNL1, ATM, LEMD3, CHAMP1, PPP1CC, NAA50, KIF18A, TOP2A, CTNNB1, BRIP1, RB1, VPS4B, CENPK, CDC27, RAD21, CCNE2, ITGB3BP, STAG2, GEN1, RACGAP1, CHMP2B, NUP160, SFPQ, NDC80, TOP2B, SKA1, SPDL1, BECN1	AURKC, SLX4, ABRAXAS2, INCENP
GO:0017148	negative regulation of translation	118	12	3	11	4.3e-05	0.00205	0.043	0.985882	Any process that stops, prevents, or reduces the frequency, rate or extent of the chemical reactions and pathways resulting in the formation of proteins by the translation of mRNA	0.661156	-0.374424	QKI, GIGYF2, SRP9, DDX3X, IREB2, AJUBA, CNOT8, AGO2, CELF1, FXR1, EIF2AK3, ZFP36L2, TOB1, SMAD3, EIF2S1, IGF2BP3, TNRC6B, CNOT6	SMAD1
GO:0000278	mitotic cell cycle	801	39	20.36	1735	5e-05	0.22783	0.045	1	Progression through the phases of the mitotic cell cycle, the most common eukaryotic cell cycle, which canonically comprises four successive phases called G1, S, G2, and M and includes replication of the genome and the subsequent segregation of chromosomes into daughter cells. In some variant cell cycles nuclear replication or nuclear division may not be followed by cell division, or G1 and G2 ph…	0.967631	-0.677315	PRKAR2B, PKN2, PPP1CB, CUL5, DSCC1, MZT1, GIGYF2, ATF2, CEP126, KNL1, NEK7, CCNG1, PHIP, ATM, CHAMP1, BACH1, MYBL1, EDN1, CDK1, DDX3X, DNA2, BIRC6, SKP2, NAA50, TOPBP1, FOXN3, CDK8, CUL4B, CD2AP, AJUBA, NPAT, LRRCC1, ADAM17, NUP58, CDKN1B, CNOT8, KIF18A, PKD2, SIRT1, TOP2A, RINT1, CTNNB1, YWHAG, RB1, VPS4B, CCP110, PPP1R12A, ANLN, CDC27, RAD21, CCNE2, ARPP19, BORA, ANKRD17, VRK1, FBXW11, ITGB3BP,…	AURKC, LZTS1, CDK11A, WASL, RNF2, E2F8, FLNA, PTCH1, TMEM8B, MRNIP, FSD1, ID2, FBXL15, RTEL1, CARM1, ABRAXAS2, GBF1, WDR62, PLK3, ALMS1, SIN3A, INCENP, CLSPN, NEDD1, XPC
GO:0071840	cellular component organization or bioge...	3975	130	101.02	1835	5.4e-05	0.24737	0.045	1	A process that results in the biosynthesis of constituent macromolecules, assembly, arrangement of constituent parts, or disassembly of a cellular component	1.1793	-1.64353	MIGA1, GDAP1, PRKAR2B, IL1RAP, SLAIN2, SERP1, G3BP2, PRKAA1, PKN2, ASCC3, CRIM1, DENND6A, AGFG1, SH3D19, ATAD2B, TIMM17A, PTPRG, DDX20, PRPF39, CENPQ, CHML, WWTR1, PHLDB2, ADAM9, COBLL1, TGFBR1, DSCC1, GTF2H2, FAM126A, CLIC4, KLF5, PARP11, NMD3, CLOCK, MAP3K1, ARPC1B, XPO1, MZT1, SRGAP2C, PEX11A, STAM, BNIP3L, UHMK1, CDK5R1, DNAAF4, ATF2, CEP126, TRAPPC13, TRNT1, KNL1, ASH1L, NUDT21, NAP1L3, NEK7…	CRYAB, HTRA1, SPP1, PANX2, IGFBP7, OSGIN1, FZD5, CNIH2, HMOX1, AURKC, GRWD1, ITGB4, SEMA6C, LZTS1, CDK11A, STMN3, ADAMTSL4, NECTIN1, CORO1A, RAB4B-EGLN2, EHD3, OMA1, PIF1, IGFBP2, BOC, CRTC1, CHCHD10, PILRB, COL6A2, KIF13B, WASL, SLX4, PPIL2, RIOX1, PLEKHF1, EFNB1, ABCA7, C1QL1, RNF2, RRP7BP, PLTP, TYRO3, PLXNB3, MTREX, MGST1, TBC1D3L, ISL2, MYO7B, CBFA2T2, SEC24B, FLNA, ARID4B, ADAMTS16, RABGAP1…
GO:0006417	regulation of translation	272	19	6.91	1845	6.1e-05	0.25071	0.0469231	1	Any process that modulates the frequency, rate or extent of the chemical reactions and pathways resulting in the formation of proteins by the translation of mRNA	0.841338	-0.381803	SERP1, SECISBP2L, QKI, UHMK1, GIGYF2, RPS6KA3, RBMS3, SRP9, DDX3X, IREB2, AJUBA, CNOT8, MTPN, DDX6, AGO2, CELF1, EIF4G3, PTCD3, FXR1, EIF2AK3, KHDRBS1, ZFP36L2, SOX4, TOB1, SMAD3, EIF2S1, LARP4, FOXO3, TRMT10C, IGF2BP3, TNRC6B, PA2G4, CNOT6	SMAD1
GO:0034622	cellular macromolecular complex assembly	699	35	17.76	72	7.4e-05	0.01112	0.05	0.985882	The aggregation, arrangement and bonding together of a set of macromolecules to form a complex, carried out at the cellular level	0.996638	-0.640929	SLAIN2, G3BP2, DDX20, PRPF39, CENPQ, COBLL1, GTF2H2, ARPC1B, MZT1, DNAAF4, KNL1, NAP1L3, ARHGAP18, TMED2, ARF6, NUFIP1, ATM, CAND1, GMFB, TMEM33, DDX3X, PSIP1, KAT6A, DNAAF2, TBCA, PDGFC, CUL4B, RICTOR, ARPC5, CDKN1B, PICALM, IMMP1L, MTPN, ASF1A, PTBP2, PIK3C2A, VBP1, RB1, TFAM, CENPK, TAF1, DDX6, AGO2, ATF7IP, ANLN, CELF1, OPA1, CAPZA1, DENR, H3F3A, PTK2, SRSF1, ARFIP1, PTGES3, YTHDC1, TAF9B, IT…	GRWD1, CORO1A, PILRB, WASL, RRP7BP, SEC24B, SMAD1, SRC, CLIP3, MED25, SRPK3, TMOD1, BRF1, AXIN1, FHOD3, NDUFS7, STX1B, SOX12, XPC
GO:0000819	sister chromatid segregation	186	15	4.73	935	7.5e-05	0.11521	0.05	1	The cell cycle process in which sister chromatids are organized and then physically separated and apportioned to two or more sets	0.766748	-0.349564	CENPQ, DSCC1, XPO1, KNL1, ATM, CHAMP1, PPP1CC, NAA50, KIF18A, TOP2A, CTNNB1, RB1, VPS4B, CENPK, CDC27, RAD21, ITGB3BP, STAG2, GEN1, RACGAP1, CHMP2B, NUP160, SFPQ, NDC80, TOP2B, SKA1, SPDL1, BECN1	AURKC, INCENP
GO:0051726	regulation of cell cycle	760	37	19.31	52	8.1e-05	0.00821	0.050625	0.985882	Any process that modulates the rate or extent of progression through the cell cycle	0.997303	-0.640466	LIN9, PRKAA1, PKN2, CUL5, TIPRL, TGFBR1, CLOCK, XPO1, UHMK1, CDK5R1, GIGYF2, ATF2, KNL1, NEK7, CCNG1, PHIP, SKIL, PRKAR1A, HMGN5, ATM, CCNI, CHORDC1, EDN1, CDK1, ZFHX3, DDX3X, DNA2, BIRC6, SKP2, CDK15, FIGNL1, TOPBP1, FOXN3, CDK8, CUL4B, CCNC, PCLAF, ADAM17, CDKN1B, CNOT8, PKD2, SIRT1, TOP2A, RINT1, CTNNB1, BRIP1, RB1, VPS4B, CCP110, TAF1, CCNYL1, ANLN, CDC27, RAD21, CCNE2, MSX2, BORA, ANKRD17, K…	AURKC, CDK11A, ZNF16, E2F8, MNT, LIN37, PTCH1, TMEM8B, TRIM36, MRNIP, GAS2L1, SRC, MED25, ID2, GAS6, CARM1, JUNB, GBF1, PLK3, SIN3A, FLT3LG, CLSPN, BRSK1, XPC
GO:0006996	organelle organization	2585	92	65.69	1776	9.4e-05	0.24281	0.0552941	1	A process that is carried out at the cellular level which results in the assembly, arrangement of constituent parts, or disassembly of an organelle within a cell. An organelle is an organized structure of distinctive morphology and function. Includes the nucleus, mitochondria, plastids, vacuoles, vesicles, ribosomes and the cytoskeleton. Excludes the plasma membrane	1.16217	-1.14717	MIGA1, GDAP1, PRKAR2B, SLAIN2, G3BP2, PRKAA1, ASCC3, AGFG1, SH3D19, ATAD2B, TIMM17A, CENPQ, WWTR1, PHLDB2, COBLL1, TGFBR1, DSCC1, GTF2H2, CLIC4, PARP11, CLOCK, MAP3K1, ARPC1B, XPO1, MZT1, SRGAP2C, PEX11A, STAM, BNIP3L, CDK5R1, DNAAF4, ATF2, CEP126, TRNT1, KNL1, ASH1L, NAP1L3, NEK7, EID1, POC1B, ARHGAP18, ANP32E, CCNG1, TDG, TMED2, PHIP, ARF6, MAP3K2, SASS6, TNKS2, PRKAR1A, OSBPL8, RAB8B, HMGN5, C…	CRYAB, FZD5, CNIH2, AURKC, GRWD1, CDK11A, STMN3, CORO1A, EHD3, OMA1, PIF1, CHCHD10, WASL, SLX4, RIOX1, PLEKHF1, RNF2, RRP7BP, TBC1D3L, SEC24B, FLNA, ARID4B, ADAMTS16, RABGAP1L, LAMA5, NRF1, GGNBP1, MKLN1, PRELID3A, LRSAM1, SRC, TMEM175, CLIP3, WASHC4, FSD1, INF2, ATG2A, TOP3B, KLC1, TMOD1, ZKSCAN3, RTEL1, RAB31, CARM1, ATP2C1, ABRAXAS2, VPS51, TFEB, AXIN1, GBF1, KMT2B, TSNARE1, WDR62, ARHGDIA, FB…
GO:0007062	sister chromatid cohesion	110	11	2.8	1	0.0001	0.0001	0.0555556	0.985882	The cell cycle process in which the sister chromatids of a replicated chromosome are associated with each other	0.727734	-0.232764	CENPQ, DSCC1, XPO1, KNL1, PPP1CC, NAA50, KIF18A, CTNNB1, RB1, CENPK, RAD21, ITGB3BP, STAG2, NUP160, SFPQ, NDC80, SKA1, SPDL1	INCENP
GO:0007059	chromosome segregation	260	18	6.61	749	0.00011	0.07493	0.0578947	0.985882	The process in which genetic material, in the form of chromosomes, is organized into specific structures and then physically separated and apportioned to two or more sets. In eukaryotes, chromosome segregation begins with the condensation of chromosomes, includes chromosome separation, and ends when chromosomes have completed movement to the spindle poles	0.790678	-0.451632	CENPQ, DSCC1, XPO1, KNL1, ATM, LEMD3, CHAMP1, DDX3X, PPP1CC, NAA50, ESCO2, KIF18A, TOP2A, CTNNB1, BRIP1, RB1, VPS4B, CENPK, CDC27, RAD21, CCNE2, ITGB3BP, STAG2, TOP1, GEN1, RACGAP1, BRCA1, CHMP2B, NUP160, SFPQ, NDC80, TOP2B, SKA1, SPDL1, BECN1	AURKC, SLX4, TOP3B, ABRAXAS2, INCENP
GO:0051493	regulation of cytoskeleton organization	286	19	7.27	257	0.00012	0.02768	0.06	0.985882	Any process that modulates the frequency, rate or extent of the formation, arrangement of constituent parts, or disassembly of cytoskeletal structures	0.899491	-0.540162	SLAIN2, PHLDB2, TGFBR1, CLIC4, ARPC1B, XPO1, CDK5R1, ARHGAP18, ARF6, GMFB, CHORDC1, EDN1, SSH2, RICTOR, CD2AP, ARPC5, CDKN1B, KIF18A, MTPN, MYPN, CTNNB1, VPS4B, ROCK1, CAPZA1, PTK2, ARFIP1, BORA, FCHSD2, BAG4, PRKCE, FER, GEN1, ROCK2, SMAD3, PDCD6IP, SMAD4, BRCA1, CHMP2B, RANBP1, ABI2, SKA1	STMN3, CORO1A, WASL, CLIP3, TMOD1, ARHGDIA, ALMS1, FHOD3, ARAP1
GO:0043933	macromolecular complex subunit organizat...	1337	55	33.98	96	0.00013	0.01465	0.0608696	0.985882	Any process in which macromolecules aggregate, disaggregate, or are modified, resulting in the formation, disassembly, or alteration of a macromolecular complex	1.06302	-1.19173	IL1RAP, SLAIN2, G3BP2, PRKAA1, DDX20, PRPF39, CENPQ, COBLL1, TGFBR1, GTF2H2, ARPC1B, MZT1, DNAAF4, KNL1, NUDT21, NAP1L3, ARHGAP18, ANP32E, GJA1, TMED2, ARF6, MRPS18C, NUFIP1, ATM, KIF5B, CAND1, GMFB, TMEM33, DNAJC6, KPNA3, CDK1, DDX3X, KCTD9, PSIP1, KAT6A, DNAAF2, TBCA, LOX, PDGFC, CUL4B, RICTOR, CD2AP, MARCKS, ARPC5, P4HA1, COL3A1, AJUBA, NUP58, FNIP1, CDKN1B, KIF18A, PICALM, STXBP3, BET1, IMMP1…	CRYAB, PANX2, FZD5, CNIH2, HMOX1, GRWD1, STMN3, CORO1A, EHD3, CRTC1, PILRB, COL6A2, WASL, ABCA7, RRP7BP, PLTP, MGST1, SEC24B, YAP1, SMAD1, COL1A2, SRC, CLIP3, MED25, SRPK3, KLC1, TMOD1, BRF1, AXIN1, TRAPPC9, AMER1, COL11A1, RABGGTA, FHOD3, AC005670.2, NDUFS7, CTNNBIP1, STX1B, SOX12, KCTD11, SCX, XPC, ME1
GO:1903047	mitotic cell cycle process	750	36	19.06	295	0.00014	0.03582	0.0608696	0.985882	A process that is part of the mitotic cell cycle	0.934386	-0.648863	PRKAR2B, PPP1CB, CUL5, DSCC1, MZT1, GIGYF2, ATF2, CEP126, KNL1, CCNG1, PHIP, ATM, CHAMP1, BACH1, EDN1, CDK1, DDX3X, DNA2, BIRC6, SKP2, NAA50, TOPBP1, FOXN3, CUL4B, CD2AP, AJUBA, NPAT, LRRCC1, ADAM17, NUP58, CDKN1B, CNOT8, KIF18A, PKD2, TOP2A, RINT1, YWHAG, RB1, VPS4B, CCP110, PPP1R12A, ANLN, CDC27, RAD21, CCNE2, ARPP19, BORA, ANKRD17, VRK1, FBXW11, ITGB3BP, CEP70, KHDRBS1, STAG2, MIS18BP1, ZFP36L…	AURKC, LZTS1, CDK11A, WASL, FLNA, MRNIP, FSD1, ID2, FBXL15, RTEL1, CARM1, ABRAXAS2, WDR62, PLK3, ALMS1, SIN3A, INCENP, CLSPN, NEDD1, XPC
GO:0046822	regulation of nucleocytoplasmic transpor...	133	12	3.38	8	0.00014	0.0016	0.0608696	0.985882	Any process that modulates the frequency, rate or extent of the directed movement of substances between the nucleus and the cytoplasm	0.812924	-0.419609	G3BP2, WWTR1, TGFBR1, XPO1, UHMK1, CTDSPL2, CDK1, PPP1CC, NUP58, RIOK2, PKD2, SIRT1, PPP1R12A, SNAI2, FBXW11, KHDRBS1, SOX4, SMAD3, SMAD4, PBLD, ZPR1	FLNA, GAS6, TONSL, RBCK1
GO:0006412	translation	525	28	13.34	810	0.00015	0.0944	0.0625	1	The cellular metabolic process in which a protein is formed, using the sequence of a mature mRNA molecule to specify the sequence of amino acids in a polypeptide chain. Translation is mediated by the ribosome, and begins with the formation of a ternary complex between aminoacylated initiator methionine tRNA, GTP, and initiation factor 2, which subsequently associates with the small subunit of the…	0.885355	-0.389866	SERP1, SECISBP2L, QKI, GTF2H2, UHMK1, GIGYF2, RPS6KA3, MRPS18C, RBMS3, SRP9, EEF2K, DDX3X, EEF1E1, RPL22L1, IREB2, AJUBA, CNOT8, MTPN, RPL21, MRPL33, DDX6, AGO2, CELF1, EIF4G3, DENR, PTCD3, FXR1, EIF2AK3, KHDRBS1, GFM1, ZFP36L2, SOX4, MRPL30, MRPL35, TOB1, SMAD3, EIF2S1, LARP4, GUF1, FOXO3, RPS3A, TRMT10C, IGF2BP3, RPS25, MRPL47, TNRC6B, TARSL2, PA2G4, CNOT6, ABCE1	SMAD1
GO:0032268	regulation of cellular protein metabolic...	1448	58	36.8	1247	0.00017	0.16438	0.0678571	1	Any process that modulates the frequency, rate or extent of the chemical reactions and pathways involving a protein, occurring at the level of an individual cell	1.11125	-0.685928	UFL1, PRKAR2B, SERP1, PRKAA1, CRIM1, SH3D19, GDF6, WWTR1, DCUN1D4, SECISBP2L, TIPRL, ADAM9, QKI, TGFBR1, MAP3K1, UHMK1, CDK5R1, GIGYF2, DNAAF4, ASH1L, RPS6KA3, EID1, RNF149, CCNG1, PHIP, MAP3K2, RBMS3, MAP4K5, PRKAR1A, OSBPL8, CDH2, ATM, IBTK, MAP4K3, GMFB, SRP9, CHORDC1, PM20D2, EEF2K, EDN1, KLF4, DUSP10, CDK1, CARD8, BMI1, DDX3X, BIRC6, TNFAIP8, SKP2, PPP1R2, NDFIP2, PDGFC, RICTOR, CCNC, REST, …	FZD5, TNFRSF19, CSF1, PILRB, MAP3K10, ABCA7, MAP3K9, WFIKKN1, ITGB3, MRNIP, SMAD1, SRC, CLIP3, RGS3, GAS6, SPRY4, AXIN1, IL6R, KMT2B, IKBKG, PLK3, ENPP2, CAMKK1, GNL3L, OXR1, AMER1, VRK2, MTA1, SIN3A, FLT3LG, CLSPN, HIPK3, PARD6A, ISG15, POR
GO:0045216	cell-cell junction organization	137	12	3.48	2556	0.00018	0.40902	0.0678571	1	A process that is carried out at the cellular level which results in the assembly, arrangement of constituent parts, or disassembly of a cell-cell junction. A cell-cell junction is a specialized region of connection between two cells	0.788621	-0.539811	PKN2, PHLDB2, TGFBR1, GJA1, RAB8B, CDH2, CADM1, AJUBA, DSG2, HEG1, CTNNB1, ROCK1, CTNND1, PRKCI, SNAI2, PTK2, CDH12, PTPRK, ROCK2, SMAD3, PDCD6IP, CDH3, CTNNA1, GNPAT	FZD5, NECTIN1, LAMA5, SRC, FBF1, TESK2, PARD6A
GO:0051246	regulation of protein metabolic process	1552	61	39.44	1171	0.00019	0.14541	0.0678571	1	Any process that modulates the frequency, rate or extent of the chemical reactions and pathways involving a protein	1.11125	-1.0423	UFL1, PRKAR2B, SERP1, PRKAA1, CRIM1, SH3D19, GDF6, WWTR1, DCUN1D4, SECISBP2L, TIPRL, ADAM9, QKI, TGFBR1, MAP3K1, XPO1, UHMK1, CDK5R1, GIGYF2, DNAAF4, UBE2J1, ASH1L, RPS6KA3, EID1, RNF149, CCNG1, GJA1, ERLEC1, PHIP, MAP3K2, RBMS3, MAP4K5, PRKAR1A, OSBPL8, CDH2, ATM, IBTK, MAP4K3, GMFB, SRP9, CHORDC1, PM20D2, EEF2K, EDN1, KLF4, DUSP10, CDK1, CARD8, BMI1, DDX3X, BIRC6, TNFAIP8, SKP2, PPP1R2, NDFIP2,…	CRYAB, FZD5, HMOX1, TNFRSF19, CSF1, PILRB, MAP3K10, ABCA7, MAP3K9, FLNA, WFIKKN1, ITGB3, MRNIP, SMAD1, SRC, CLIP3, RGS3, GAS6, SPRY4, LAG3, TMEM259, AXIN1, IL6R, KMT2B, IKBKG, PLK3, ENPP2, CAMKK1, GNL3L, OXR1, AMER1, VRK2, MTA1, SIN3A, FLT3LG, CLSPN, HIPK3, PARD6A, ISG15, POR
GO:0043603	cellular amide metabolic process	704	34	17.89	1493	0.00019	0.19486	0.0678571	1	The chemical reactions and pathways involving an amide, any derivative of an oxoacid in which an acidic hydroxy group has been replaced by an amino or substituted amino group, as carried out by individual cells	0.971981	-0.507308	SERP1, PRKAA1, SGMS1, SECISBP2L, QKI, ERAP1, GTF2H2, UHMK1, GIGYF2, RPS6KA3, CARNMT1, MRPS18C, RBMS3, UGCG, SRP9, EEF2K, DDX3X, EEF1E1, SLC25A32, CPS1, RPL22L1, IREB2, AJUBA, CNOT8, PICALM, IMMP1L, MTPN, RPL21, MRPL33, DDX6, AGO2, CELF1, GCLC, EIF4G3, SLC46A1, DENR, PTCD3, CHAC2, FXR1, EIF2AK3, KHDRBS1, GFM1, ZFP36L2, SOX4, MRPL30, MRPL35, TOB1, PCSK7, SMAD3, CYR61, EIF2S1, LARP4, GUF1, FOXO3, GG…	GSTM4, ABCA7, MGST1, SMAD1, GAS6, AASDH, PLK3
GO:0032386	regulation of intracellular transport	323	20	8.21	2980	0.0002	0.52753	0.0689655	1	Any process that modulates the frequency, rate or extent of the directed movement of substances within cells	0.895993	-0.999177	G3BP2, WWTR1, TGFBR1, XPO1, BNIP3L, UHMK1, CDK5R1, UBE2J1, ERLEC1, UGCG, KIF5B, RAB5A, CTDSPL2, CDK1, C2CD5, NUS1, PPP1CC, NUP58, RIOK2, PKD2, SIRT1, RINT1, PPP1R12A, SNAI2, FBXW11, KHDRBS1, BAG4, SOX4, FER, SMAD3, SMAD4, OSCP1, CDH3, PBLD, VAMP7, RBM22, ZPR1	CRYAB, FZD5, CNIH2, HMOX1, SEC24B, FLNA, PRELID3A, SRC, GAS6, PLK3, TONSL, STX1B, RBCK1
GO:1903827	regulation of cellular protein localizat...	402	23	10.22	108	0.00022	0.01669	0.0733333	0.985882		0.936932	-0.563027	G3BP2, CENPQ, WWTR1, TGFBR1, NMD3, XPO1, BNIP3L, UHMK1, CDK5R1, UBE2J1, ERLEC1, ARF6, CDH2, UGCG, KIF5B, CTDSPL2, CDK1, C2CD5, CD2AP, STX6, NUP58, RIOK2, PKD2, TAX1BP3, SIRT1, CTNNB1, YWHAG, RB1, CCNE2, PRKCI, SNAI2, FBXW11, DNAJA1, EIF2AK3, BAG4, PRKCE, SOX4, SMAD3, SMAD4, OSCP1, PBLD, GBP1, NDC80, CRIPT, RALB, VAMP7, RBM22, ZPR1, WNT5A	FZD5, FLNA, PRELID3A, SRC, CLIP3, GAS6, GBF1, PLK3, GNL3L, LYPLA1, TONSL, SIN3A, RBCK1, PARD6A, GLIS2
GO:0043043	peptide biosynthetic process	539	28	13.7	939	0.00023	0.11627	0.0741935	1	The chemical reactions and pathways resulting in the formation of peptides, compounds of 2 or more (but usually less than 100) amino acids where the alpha carboxyl group of one is bound to the alpha amino group of another. This may include the translation of a precursor protein and its subsequent processing into a functional peptide	0.885355	-0.401918	SERP1, SECISBP2L, QKI, GTF2H2, UHMK1, GIGYF2, RPS6KA3, MRPS18C, RBMS3, SRP9, EEF2K, DDX3X, EEF1E1, RPL22L1, IREB2, AJUBA, CNOT8, MTPN, RPL21, MRPL33, DDX6, AGO2, CELF1, GCLC, EIF4G3, DENR, PTCD3, CHAC2, FXR1, EIF2AK3, KHDRBS1, GFM1, ZFP36L2, SOX4, MRPL30, MRPL35, TOB1, SMAD3, EIF2S1, LARP4, GUF1, FOXO3, GGCT, RPS3A, TRMT10C, IGF2BP3, RPS25, MRPL47, TNRC6B, TARSL2, PA2G4, CNOT6, ABCE1	SMAD1, AASDH
GO:0010608	posttranscriptional regulation of gene e...	378	22	9.61	1779	0.00024	0.24505	0.075	1	Any process that modulates the frequency, rate or extent of gene expression after the production of an RNA transcript	0.86736	-0.383611	SERP1, SECISBP2L, QKI, XPO1, UHMK1, GIGYF2, RPS6KA3, RBMS3, SRP9, DDX3X, IREB2, AJUBA, CNOT8, MTPN, DDX6, AGO2, CELF1, EIF4G3, PTCD3, FXR1, EIF2AK3, KHDRBS1, ZFP36L2, SOX4, TOB1, SMAD3, EIF2S1, LARP4, FOXO3, TRMT10C, IGF2BP3, TNRC6B, PA2G4, CNOT6	SMAD1
GO:0016043	cellular component organization	3788	122	96.26	2625	0.00029	0.42369	0.0878788	1	A process that results in the assembly, arrangement of constituent parts, or disassembly of a cellular component	1.1793	-1.64353	MIGA1, GDAP1, PRKAR2B, IL1RAP, SLAIN2, SERP1, G3BP2, PRKAA1, PKN2, ASCC3, CRIM1, DENND6A, AGFG1, SH3D19, ATAD2B, TIMM17A, PTPRG, DDX20, PRPF39, CENPQ, CHML, WWTR1, PHLDB2, ADAM9, COBLL1, TGFBR1, DSCC1, GTF2H2, FAM126A, CLIC4, KLF5, PARP11, CLOCK, MAP3K1, ARPC1B, XPO1, MZT1, SRGAP2C, PEX11A, STAM, BNIP3L, UHMK1, CDK5R1, DNAAF4, ATF2, CEP126, TRAPPC13, TRNT1, KNL1, ASH1L, NUDT21, NAP1L3, NEK7, RPS6…	CRYAB, HTRA1, SPP1, PANX2, IGFBP7, OSGIN1, FZD5, CNIH2, HMOX1, AURKC, GRWD1, ITGB4, SEMA6C, LZTS1, CDK11A, STMN3, ADAMTSL4, NECTIN1, CORO1A, RAB4B-EGLN2, EHD3, OMA1, PIF1, IGFBP2, BOC, CRTC1, CHCHD10, PILRB, COL6A2, KIF13B, WASL, SLX4, PPIL2, RIOX1, PLEKHF1, EFNB1, ABCA7, C1QL1, RNF2, RRP7BP, PLTP, TYRO3, PLXNB3, MGST1, TBC1D3L, ISL2, MYO7B, CBFA2T2, SEC24B, FLNA, ARID4B, ADAMTS16, RABGAP1L, PTCH…
GO:0051169	nuclear transport	335	20	8.51	1650	0.00033	0.21726	0.0942857	1	The directed movement of substances into, out of, or within the nucleus	0.937281	-0.424207	G3BP2, AGFG1, DDX20, WWTR1, TGFBR1, NMD3, XPO1, UHMK1, KPNA3, CTDSPL2, CDK1, PSIP1, PPP1CC, NUP58, KPNA1, RIOK2, PKD2, SIRT1, HEATR3, CTNNB1, THOC7, PPP1R12A, IPO7, SNAI2, SRSF1, FBXW11, PHAX, KHDRBS1, SOX4, TOB1, MAGOHB, SMAD3, SMAD4, NUP160, SNRPE, PBLD, RANBP1, RBM22, NSRP1, F2R, ZPR1, STRADB, NUP155, ABCE1	FLNA, GAS6, TONSL, RBCK1, WDR33
GO:0045292	mRNA cis splicing, via spliceosome	14	4	0.36	122	0.00033	0.02025	0.0942857	0.985882	The joining together, after removal of an intervening sequence composed of one or more introns, of two segments of the same RNA molecule via spliceosomal catalysis to produce an mRNA composed only of exon sequences that all came from the same primary transcript	0.334899	-0.00485437	PRPF39, PSIP1, SRSF1, RBM22
GO:0006518	peptide metabolic process	616	30	15.65	1042	0.00041	0.12583	0.113889	1	The chemical reactions and pathways involving peptides, compounds of two or more amino acids where the alpha carboxyl group of one is bound to the alpha amino group of another	0.911773	-0.506631	SERP1, SECISBP2L, QKI, ERAP1, GTF2H2, UHMK1, GIGYF2, RPS6KA3, CARNMT1, MRPS18C, RBMS3, SRP9, EEF2K, DDX3X, EEF1E1, RPL22L1, IREB2, AJUBA, CNOT8, PICALM, IMMP1L, MTPN, RPL21, MRPL33, DDX6, AGO2, CELF1, GCLC, EIF4G3, DENR, PTCD3, CHAC2, FXR1, EIF2AK3, KHDRBS1, GFM1, ZFP36L2, SOX4, MRPL30, MRPL35, TOB1, PCSK7, SMAD3, EIF2S1, LARP4, GUF1, FOXO3, GGCT, RPS3A, TRMT10C, IGF2BP3, RPS25, MRPL47, TNRC6B, T…	GSTM4, ABCA7, MGST1, SMAD1, GAS6, AASDH, PLK3
GO:0032269	negative regulation of cellular protein ...	647	31	16.44	1053	0.00043	0.13122	0.116216	1	Any process that stops, prevents, or reduces the frequency, rate or extent of the chemical reactions and pathways involving a protein, occurring at the level of an individual cell	0.988787	-0.491995	UFL1, PRKAR2B, CRIM1, WWTR1, TIPRL, QKI, GIGYF2, ASH1L, RPS6KA3, RNF149, PRKAR1A, IBTK, GMFB, SRP9, CHORDC1, EDN1, KLF4, DUSP10, CDK1, DDX3X, BIRC6, TNFAIP8, IREB2, AJUBA, FNIP1, CDKN1B, CNOT8, PICALM, SOCS5, SIRT1, TFPI, ZNF675, CTNNB1, YWHAG, RB1, OPHN1, TAF1, ROCK1, AGO2, SENP1, CELF1, GCLC, CDC27, ARPP19, DNAJA1, FXR1, EIF2AK3, ZFP36L2, ARL6IP1, PRKCE, SOX4, CDKN2B, SENP2, GLMN, ROCK2, ZNF451…	WFIKKN1, SMAD1, SRC, RGS3, GAS6, SPRY4, GNL3L, OXR1, SIN3A, HIPK3, PARD6A, ISG15, POR
GO:0034333	adherens junction assembly	55	7	1.4	100	0.00045	0.01601	0.118421	0.985882	The aggregation, arrangement and bonding together of a set of components to form an adherens junction. An adherens junction is a cell junction at which the cytoplasmic face of the plasma membrane is attached to actin filaments	0.532533	-0.381394	PHLDB2, AJUBA, CTNNB1, ROCK1, PTK2, PTPRK, ROCK2, SMAD3	LAMA5, SRC, TESK2
GO:0065003	macromolecular complex assembly	1144	47	29.07	390	0.00048	0.04885	0.123077	0.985882	The aggregation, arrangement and bonding together of a set of macromolecules to form a complex	1.05676	-1.14125	IL1RAP, SLAIN2, G3BP2, PRKAA1, DDX20, PRPF39, CENPQ, COBLL1, GTF2H2, ARPC1B, MZT1, DNAAF4, KNL1, NUDT21, NAP1L3, ARHGAP18, GJA1, TMED2, ARF6, NUFIP1, ATM, CAND1, GMFB, TMEM33, KPNA3, CDK1, DDX3X, KCTD9, PSIP1, KAT6A, DNAAF2, TBCA, PDGFC, CUL4B, RICTOR, CD2AP, MARCKS, ARPC5, AJUBA, NUP58, FNIP1, CDKN1B, PICALM, STXBP3, BET1, IMMP1L, ATL2, MTPN, ASF1A, PTBP2, PIK3C2A, VBP1, CTNNB1, RB1, SOD2, TFAM,…	CRYAB, PANX2, CNIH2, HMOX1, GRWD1, CORO1A, EHD3, CRTC1, PILRB, COL6A2, WASL, ABCA7, RRP7BP, MGST1, SEC24B, YAP1, SMAD1, COL1A2, SRC, CLIP3, MED25, SRPK3, TMOD1, BRF1, AXIN1, TRAPPC9, AMER1, RABGGTA, FHOD3, AC005670.2, NDUFS7, CTNNBIP1, STX1B, SOX12, KCTD11, XPC, ME1
GO:0042752	regulation of circadian rhythm	56	7	1.42	112	0.0005	0.01745	0.125	0.985882	Any process that modulates the frequency, rate or extent of a circadian rhythm. A circadian rhythm is a biological process in an organism that recurs with a regularity of approximately 24 hours	0.719694	-0.364155	PRKAA1, PPP1CB, FBXL3, NR1D2, ZFHX3, PPP1CC, TOP2A, OPN3, FBXW11, ROCK2, SFPQ	CRTC1, ID2, MTA1, SIN3A
GO:0051248	negative regulation of protein metabolic...	686	32	17.43	1069	0.00055	0.1353	0.134146	1	Any process that stops, prevents, or reduces the frequency, rate or extent of chemical reactions and pathways involving a protein	0.991359	-0.863672	UFL1, PRKAR2B, CRIM1, WWTR1, TIPRL, QKI, GIGYF2, UBE2J1, ASH1L, RPS6KA3, RNF149, ERLEC1, PRKAR1A, IBTK, GMFB, SRP9, CHORDC1, EDN1, KLF4, DUSP10, CDK1, DDX3X, BIRC6, TNFAIP8, IREB2, AJUBA, FNIP1, CDKN1B, CNOT8, PICALM, SOCS5, SIRT1, TFPI, ZNF675, CTNNB1, YWHAG, RB1, OPHN1, TAF1, ROCK1, AGO2, SENP1, CELF1, GCLC, CDC27, ARPP19, DNAJA1, FXR1, EIF2AK3, ITGAV, ZFP36L2, ARL6IP1, PRKCE, SOX4, CDKN2B, SEN…	CRYAB, ABCA7, FLNA, WFIKKN1, ITGB3, SMAD1, SRC, RGS3, GAS6, SPRY4, LAG3, GNL3L, OXR1, SIN3A, HIPK3, PARD6A, ISG15, POR
GO:0031032	actomyosin structure organization	94	9	2.39	142	0.00061	0.02304	0.139216	0.985882	A process that is carried out at the cellular level which results in the assembly, arrangement of constituent parts, or disassembly of cytoskeletal structures containing both actin and myosin or paramyosin. The myosin may be organized into filaments	0.644578	-0.398346	PHLDB2, TGFBR1, PRKAR1A, EDN1, MYPN, ROCK1, EPB41L2, BAG4, RACGAP1, ROCK2, SMAD3, PDCD6IP, SMAD4, EPB41L4A, CNN3, MYOM2	SRC, TMOD1, ALMS1, FHOD3, ARAP1
GO:0006679	glucosylceramide biosynthetic process	2	2	0.05	2	0.00064	0.00064	0.139216	0.985882	The chemical reactions and pathways resulting in the formation of glucosylceramides, any compound formed by the replacement of the glycosidic hydroxyl group of a cyclic form of glucose by a ceramide group	0.943716	0.943716	PRKAA1, UGCG
GO:0046476	glycosylceramide biosynthetic process	2	2	0.05	4005	0.00064	1	0.139216	1	The chemical reactions and pathways resulting in the formation of glycosylceramides, any compound formed by the replacement of the glycosidic hydroxyl group of a cyclic form of a monosaccharide (or derivative) by a ceramide group	0.943716	0.943716	PRKAA1, UGCG
GO:0043280	positive regulation of cysteine-type end...	76	8	1.93	3	0.00065	0.00065	0.139216	0.985882	Any process that activates or increases the activity of a cysteine-type endopeptidase involved in the apoptotic process	0.556485	-0.230706	CARD8, DDX3X, REST, CDKN1B, SIRT1, SENP1, EIF2AK3, ARL6IP5, SMAD3, CYR61, F2R
GO:0052548	regulation of endopeptidase activity	180	13	4.57	930	0.00066	0.1147	0.139216	1	Any process that modulates the frequency, rate or extent of endopeptidase activity, the endohydrolysis of peptide bonds within proteins	0.715689	-0.417303	CRIM1, RPS6KA3, KLF4, CARD8, DDX3X, BIRC6, TNFAIP8, REST, FNIP1, CDKN1B, PICALM, SIRT1, TFPI, SENP1, EIF2AK3, ARL6IP1, SH3RF1, ARL6IP5, SMAD3, CYR61, F2R, PRDX3	WFIKKN1, SRC, GAS6, POR
GO:0006928	movement of cell or subcellular componen...	938	40	23.84	73	0.00067	0.01142	0.139216	0.985882	The directed, self-propelled movement of a cellular component without the involvement of an external agent such as a transporter or a pore	0.950485	-0.871352	PKN2, PTPRG, PHLDB2, ADAM9, TGFBR1, CLIC4, ARPC1B, SRGAP2C, CDK5R1, DNAAF4, ASH1L, ARHGAP18, GJA1, ARF6, OSBPL8, DNER, CDH2, KIF5B, ITGA4, EDN1, KLF4, ICK, CDK1, SLC16A1, PTP4A1, DNAAF2, MYO1B, USP33, DSC2, PDGFC, NFIB, MGARP, PARVA, CD2AP, HIF1A, SGK3, ARPC5, COL3A1, AJUBA, ADAM17, PSPN, NRAS, CDKN1B, KIF18A, DSG2, EPHA4, CD24, RYK, AP3S1, C5AR1, FGF2, MYPN, DPYSL2, CTNNB1, MYO5A, SOD2, GCNT1, O…	CNIH2, HOXB9, HMOX1, LTB4R2, ITGB4, PLEKHG5, SEMA6C, NECTIN1, CORO1A, CSF1, SLC7A11, TRPM4, BOC, KIF13B, WASL, PPIL2, KIF21B, EFNB1, PLTP, TYRO3, PLXNB3, ISL2, FLNA, LAMA5, ITGB3, CD274, IL17RC, COL1A2, SRC, PLXNA1, GAS6, KLC1, TMOD1, COL18A1, IL6R, GBF1, ADAM15, ARHGDIA, SCN1B, GPC1, DGKZ, ENPP2, MYO6, CD34, GAS8, ARAP1, PRKX, GLI2, SRGAP1, SEMA4F, SCG2
GO:0006913	nucleocytoplasmic transport	328	19	8.34	2232	0.00067	0.33287	0.139216	1	The directed movement of molecules between the nucleus and the cytoplasm	0.937281	-0.424207	G3BP2, AGFG1, DDX20, WWTR1, TGFBR1, NMD3, XPO1, UHMK1, KPNA3, CTDSPL2, CDK1, PPP1CC, NUP58, KPNA1, RIOK2, PKD2, SIRT1, HEATR3, CTNNB1, THOC7, PPP1R12A, IPO7, SNAI2, SRSF1, FBXW11, PHAX, KHDRBS1, SOX4, TOB1, MAGOHB, SMAD3, SMAD4, NUP160, SNRPE, PBLD, RANBP1, RBM22, NSRP1, F2R, ZPR1, STRADB, NUP155, ABCE1	FLNA, GAS6, TONSL, RBCK1, WDR33
GO:0044087	regulation of cellular component biogene...	520	26	13.21	2116	0.00069	0.30368	0.139216	1	Any process that modulates the frequency, rate or extent of cellular component biogenesis, a process that results in the biosynthesis of constituent macromolecules, assembly, and arrangement of constituent parts of a cellular component	0.993725	-0.995968	IL1RAP, SLAIN2, PRKAA1, PHLDB2, TGFBR1, GTF2H2, KLF5, ARPC1B, SRGAP2C, STAM, ARHGAP18, GJA1, ARF6, ATM, CAND1, GMFB, SACS, RAB5A, EEF2K, EDN1, SSH2, DDX3X, CUL4B, RICTOR, ATP8B1, ARPC5, REST, AJUBA, FNIP1, CDKN1B, RIOK2, MTPN, CTNNB1, RB1, VPS4B, CCP110, TAF1, ROCK1, ATF7IP, WDR43, RAB3GAP2, CAPZA1, SNAI2, H3F3A, PTK2, ARFIP1, FCHSD2, BAG4, PRKCE, FER, ROCK2, ZNF451, PAN3, RPA3, SMAD3, CYR61, PDC…	CRYAB, FZD5, NECTIN1, CORO1A, WASL, SLX4, PLXNB3, SEC24B, ADAMTS16, LRRC24, LRSAM1, SRC, CLIP3, MED25, TMOD1, RTEL1, ALMS1, FHOD3, ARAP1, AGRN, CTNNBIP1, STX1B
GO:0000226	microtubule cytoskeleton organization	329	19	8.36	249	0.0007	0.02565	0.139216	0.985882	A process that is carried out at the cellular level which results in the assembly, arrangement of constituent parts, or disassembly of cytoskeletal structures comprising microtubules and their associated proteins	0.889508	-0.888675	SLAIN2, PHLDB2, XPO1, MZT1, SRGAP2C, CDK5R1, DNAAF4, CEP126, NEK7, SASS6, HOOK3, CHORDC1, CDK1, SLC16A1, ATXN7, DNAAF2, USP33, FIGNL1, PCLAF, GAS2L3, CDKN1B, KIF18A, PKD2, CTNNB1, VPS4B, CCP110, PPP1R12A, PTK2, BORA, FER, GEN1, RACGAP1, ROCK2, RNF19A, DYNC1LI2, PDCD6IP, BRCA1, CHMP2B, NDC80, CETN3, CRIPT, RANBP1, NIN, FOPNL, SKA1, RANBP9, SPDL1, ZPR1, ARMC4	CRYAB, AURKC, STMN3, FLNA, CLIP3, ABRAXAS2, AXIN1, WDR62, PLK3, MAP2, GAS8, PARD6A, BRSK1
GO:0000375	RNA splicing, via transesterification re...	278	17	7.06	610	0.00071	0.0713	0.139216	0.985882	Splicing of RNA via a series of two transesterification reactions	0.772504	-0.429201	DDX20, PRPF39, MBNL2, NUDT21, ELAVL2, PSIP1, LSM5, HNRNPA3, PTBP2, PNN, CELF1, WTAP, SRSF1, YTHDC1, KHDRBS1, DYRK1A, CWC15, MAGOHB, RNPC3, PAPOLA, GTF2F2, SNRPE, SFPQ, POLR2K, CWC27, RBM22, NSRP1, PPIL1	MTREX, AC009690.3, SRPK3, PRPF40B, WDR33
GO:0003007	heart morphogenesis	117	10	2.97	4	0.00076	0.00076	0.142593	0.985882	The developmental process in which the heart is generated and organized. The heart is a hollow, muscular organ, which, by contracting rhythmically, keeps up the circulation of the blood	0.6962	-0.460644	TGFBR1, ATF2, TMED2, RARB, RBPJ, PARVA, HIF1A, PKD2, HEG1, CTNNB1, MSX2, SNAI2, PTK2, SOX4, SMAD3, CYR61, ADAMTS1, SMAD4, TBX3, WNT5A	SEC24B, PTCH1, YAP1, ID2, ADAM15, COL11A1
GO:0051495	positive regulation of cytoskeleton orga...	117	10	2.97	140	0.00076	0.02275	0.142593	0.985882	Any process that activates or increases the frequency, rate or extent of the formation, arrangement of constituent parts, or disassembly of cytoskeletal structures	0.765265	-0.401897	SLAIN2, TGFBR1, ARPC1B, ARF6, GMFB, EDN1, RICTOR, ARPC5, CDKN1B, VPS4B, ARFIP1, BAG4, PRKCE, FER, ROCK2, SMAD3, RANBP1, ABI2	CORO1A, WASL
GO:0008380	RNA splicing	358	20	9.1	1165	0.00077	0.14362	0.142593	1	The process of removing sections of the primary RNA transcript to remove sequences not present in the mature form of the RNA and joining the remaining sections to form the mature form of the RNA	0.869781	-0.450477	DDX20, PRPF39, MBNL2, QKI, ZRANB2, PRPF38B, NUDT21, ELAVL2, PSIP1, LSM5, HNRNPA3, PTBP2, THOC7, PNN, CELF1, WTAP, ZNF326, SRSF1, YTHDC1, KHDRBS1, DYRK1A, CWC15, PPP4R2, MAGOHB, RNPC3, TSEN2, TSEN15, PAPOLA, GTF2F2, SNRPE, SFPQ, POLR2K, CWC27, RBM22, NSRP1, PTBP3, ZPR1, PPIL1, PPIG	MTREX, AC009690.3, SRPK3, PRPF40B, WDR62, WDR33
GO:0007017	microtubule-based process	470	24	11.94	121	0.00083	0.01986	0.150909	0.985882	Any cellular process that depends upon or alters the microtubule cytoskeleton, that part of the cytoskeleton comprising microtubules and their associated proteins	0.889508	-0.991156	SLAIN2, PHLDB2, XPO1, MZT1, SRGAP2C, CDK5R1, DNAAF4, CEP126, NEK7, SASS6, KIF5B, HOOK3, CHORDC1, ICK, CDK1, SLC16A1, TUBD1, ATXN7, DNAAF2, USP33, FIGNL1, MGARP, HIF1A, PCLAF, GAS2L3, CDKN1B, KIF18A, PKD2, AP3S1, VBP1, CTNNB1, TUBB2A, VPS4B, CCP110, PPP1R12A, OPA1, SPA17, IFT81, PTK2, BORA, TTC26, FER, GEN1, RACGAP1, ROCK2, OFD1, CLUAP1, IFT74, RNF19A, DYNC1LI2, PDCD6IP, BRCA1, CHMP2B, NDC80, CETN…	CRYAB, CNIH2, AURKC, STMN3, KIF13B, KIF21B, FLNA, CLIP3, KLC1, ABRAXAS2, AXIN1, WDR62, PLK3, MAP2, GAS8, PARD6A, BRSK1
GO:0034330	cell junction organization	163	12	4.14	3211	0.00089	0.60763	0.156897	1	A process that is carried out at the cellular level which results in the assembly, arrangement of constituent parts, or disassembly of a cell junction. A cell junction is a specialized region of connection between two cells or between a cell and the extracellular matrix	0.788621	-0.638837	PKN2, PHLDB2, TGFBR1, GJA1, RAB8B, CDH2, CADM1, AJUBA, DSG2, HEG1, CTNNB1, ROCK1, CTNND1, PRKCI, SNAI2, PTK2, CDH12, PTPRK, ROCK2, SMAD3, PDCD6IP, LAMC2, ITGA6, CDH3, CTNNA1, LAMA3, GNPAT	FZD5, ITGB4, NECTIN1, FLNA, LAMA5, ITGB3, SRC, PLEC, FBF1, TESK2, PARD6A
GO:0051297	centrosome organization	99	9	2.52	1070	0.0009	0.13532	0.156897	1	A process that is carried out at the cellular level which results in the assembly, arrangement of constituent parts, or disassembly of a centrosome, a structure comprised of a pair of centrioles and peri-centriolar material from which a microtubule spindle apparatus is organized	0.671245	-0.336854	XPO1, SASS6, CHORDC1, CDK1, SLC16A1, USP33, PCLAF, PKD2, CTNNB1, VPS4B, CCP110, PPP1R12A, GEN1, ROCK2, PDCD6IP, BRCA1, CHMP2B, CETN3, RANBP1	WDR62, PARD6A, BRSK1
GO:0007015	actin filament organization	210	14	5.34	1653	0.00091	0.22097	0.156897	1	A process that is carried out at the cellular level which results in the assembly, arrangement of constituent parts, or disassembly of cytoskeletal structures comprising actin filaments. Includes processes that control the spatial distribution of actin filaments, such as organizing filaments into meshworks, bundles, or other structures, as by cross-linking	0.813493	-0.512192	PHLDB2, COBLL1, TGFBR1, ARPC1B, ARHGAP18, ARF6, GMFB, SSH2, MYO1B, RICTOR, MARCKS, ARPC5, MTPN, ROCK1, PRKCI, PLS3, CAPZA1, ARFIP1, FCHSD2, BAG4, PRKCE, FER, ROCK2, SMAD3, CTNNA1, ABI2, MYOM2, TTC17	CORO1A, WASL, FLNA, SRC, TMOD1, ALMS1, FHOD3, ARAP1
GO:2001056	positive regulation of cysteine-type end...	81	8	2.06	4006	0.001	1	0.169492	1	Any process that activates or increases the frequency, rate or extent of cysteine-type endopeptidase activity	0.556485	-0.251195	CARD8, DDX3X, REST, CDKN1B, SIRT1, SENP1, EIF2AK3, ARL6IP5, SMAD3, CYR61, F2R
GO:0043281	regulation of cysteine-type endopeptidas...	122	10	3.1	2150	0.00106	0.31518	0.17377	1	Any process that modulates the activity of a cysteine-type endopeptidase involved in apoptosis	0.647128	-0.341757	RPS6KA3, KLF4, CARD8, DDX3X, TNFAIP8, REST, FNIP1, CDKN1B, SIRT1, SENP1, EIF2AK3, ARL6IP1, SH3RF1, ARL6IP5, SMAD3, CYR61, F2R, PRDX3	SRC, GAS6, POR
GO:0048518	positive regulation of biological proces...	2941	97	74.74	2931	0.00106	0.51488	0.17377	1	Any process that activates or increases the frequency, rate or extent of a biological process. Biological processes are regulated by many means; examples include the control of gene expression, protein modification or interaction with a protein or substrate molecule	1.1637	-1.27859	UFL1, PRKAR2B, IL1RAP, SMAD5, SLAIN2, SERP1, PRKAA1, PKN2, DENND6A, SH3D19, ATAD2B, GDF6, DDX20, CENPQ, EDIL3, UBE2D2, WWTR1, DCUN1D4, PHLDB2, ADAM9, QKI, TGFBR1, DSCC1, ERAP1, GTF2H2, KLF5, NMD3, CLOCK, MAP3K1, HOXA3, ARPC1B, GOLT1B, SRGAP2C, POGLUT1, STAM, BNIP3L, UHMK1, CDK5R1, ATF2, ASH1L, SCOC, NEK7, RPS6KA3, FUBP3, FRMPD4, GJA1, TMED2, PHIP, ARF6, MAP3K2, RBMS3, MED13, MAP4K5, SKIL, NUFIP1,…	HTRA1, SPP1, OSGIN1, FZD5, HOXB9, HMOX1, AURKC, PLEKHG5, GPR68, DYRK1B, TNFRSF19, ADAMTSL4, SLC30A3, CORO1A, CSF1, EHD3, LAT2, TRPM4, IGFBP2, BOC, CRTC1, PILRB, PTH1R, WASL, SLX4, ACTA2, ZNF16, PLEKHF1, EFNB1, MAP3K10, ABCA7, MAP3K9, WDR24, PLTP, TYRO3, PLXNB3, E2F8, CBFA2T2, FLNA, ARID4B, MZF1, PTCH1, ITGB3, CD274, NRF1, YAP1, LRRC24, IL17RC, PRELID3A, LRSAM1, MRNIP, ZNF567, SMAD1, FOXO6, SRC, C…
GO:0007045	cell-substrate adherens junction assembl...	47	6	1.19	342	0.00113	0.04193	0.175385	0.985882	The aggregation, arrangement, and bonding together of a set of components to form a cell-substrate adherens junction	0.509836	-0.373761	PHLDB2, AJUBA, ROCK1, PTK2, PTPRK, ROCK2, SMAD3	LAMA5, SRC, TESK2
GO:0048041	focal adhesion assembly	47	6	1.19	343	0.00113	0.04193	0.175385	0.985882	The aggregation and bonding together of a set of components to form a focal adhesion, a complex of intracellular signaling and structural proteins that provides a structural link between the internal actin cytoskeleton and the ECM, and also function as a locus of signal transduction activity	0.509836	-0.373761	PHLDB2, AJUBA, ROCK1, PTK2, PTPRK, ROCK2, SMAD3	LAMA5, SRC, TESK2
GO:0051149	positive regulation of muscle cell diffe...	47	6	1.19	6	0.00113	0.00113	0.175385	0.985882	Any process that activates or increases the frequency, rate or extent of muscle cell differentiation	0.552903	-0.370006	CDH2, EDN1, RBPJ, SIRT1, CTNNB1, EFNB2, SPAG9, CTNNA1, TRIM32	BOC, FLT3LG
GO:0050790	regulation of catalytic activity	1388	53	35.27	811	0.00114	0.09517	0.175385	1	Any process that modulates the activity of an enzyme	1.07288	-0.811726	PRKAR2B, PRKAA1, CRIM1, DENND6A, AGFG1, CHML, WWTR1, DCUN1D4, TIPRL, ADAM9, TGFBR1, DSCC1, ARHGAP12, MAT2B, MAP3K1, SRGAP2C, CDK5R1, ELMOD2, TRAPPC13, KNL1, FAM13B, NEK7, RPS6KA3, DENND5B, ARHGAP18, ANP32E, CCNG1, TDG, TMED2, MAP3K2, MAP4K5, PRKAR1A, OSBPL8, CAND1, IBTK, MAP4K3, GMFB, CHORDC1, TOR1AIP2, SH3RF2, EDN1, KLF4, DUSP10, TBC1D9, CDK1, CARD8, BMI1, RALGPS2, DDX3X, RASA2, SHOC2, BIRC6, TN…	FZD5, LTB4R2, PLEKHG5, NEIL1, GRIN2D, STMN3, CSF1, PIF1, CHCHD10, PILRB, WASL, SLX4, WDR81, ZNF16, MAP3K10, MAP3K9, PLXNB3, TBC1D3L, DEPDC5, RABGAP1L, WFIKKN1, ITGB3, LMTK3, MRNIP, SRC, DLG3, NOXA1, RGS3, RALGDS, GAS6, NQO1, PINLYP, AXIN1, GBF1, IKBKG, ARHGDIA, TRAPPC9, CAMKK1, PNKP, LYPLA1, ARHGAP45, RASGRF1, CLSPN, PPP1R16A, HIPK3, ARAP1, AGRN, SBF1, MYO9A, SRGAP1, VPS9D1, APBA3, POR
GO:0044085	cellular component biogenesis	1973	70	50.14	898	0.00118	0.10153	0.178788	1	A process that results in the biosynthesis of constituent macromolecules, assembly, and arrangement of constituent parts of a cellular component. Includes biosynthesis of constituent macromolecules, and those macromolecular modifications that are involved in synthesis or assembly of the cellular component	1.11887	-1.22772	PRKAR2B, IL1RAP, SLAIN2, G3BP2, PRKAA1, PKN2, AGFG1, DDX20, PRPF39, CENPQ, WWTR1, PHLDB2, COBLL1, TGFBR1, GTF2H2, KLF5, NMD3, ARPC1B, XPO1, MZT1, SRGAP2C, PEX11A, STAM, DNAAF4, CEP126, KNL1, NUDT21, NAP1L3, NEK7, POC1B, ARHGAP18, GJA1, ERI2, TMED2, ARF6, NUFIP1, SASS6, PRKAR1A, DNER, CDH2, ATM, CAND1, GMFB, TMEM33, SACS, RAB5A, KPNA3, EEF2K, C1D, EDN1, ICK, CDK1, SSH2, DDX3X, KCTD9, DNA2, PTPDC1,…	CRYAB, PANX2, FZD5, CNIH2, HMOX1, AURKC, GRWD1, ITGB4, NECTIN1, CORO1A, EHD3, CRTC1, PILRB, COL6A2, WASL, SLX4, ABCA7, RRP7BP, PLXNB3, MTREX, MGST1, MYO7B, SEC24B, FLNA, ADAMTS16, LAMA5, ITGB3, IBA57, YAP1, LRRC24, LRSAM1, EMG1, SMAD1, COL1A2, SRC, TMEM175, CLIP3, MED25, ATG2A, PLEC, GAS6, SRPK3, TMOD1, BRF1, RTEL1, ABRAXAS2, AXIN1, WDR62, TBL3, FBF1, TRAPPC9, PEX16, GPC1, GNL3L, AMER1, ALMS1, RA…
GO:0048261	negative regulation of receptor-mediated...	9	3	0.23	7	0.00121	0.00121	0.180597	0.985882	Any process that stops, prevents, or reduces the frequency, rate or extent of receptor mediated endocytosis, the uptake of external materials by cells, utilizing receptors to ensure specificity of transport	0.193221	0.193221	ARF6, PICALM
GO:0035194	posttranscriptional gene silencing by RN...	48	6	1.22	396	0.00127	0.04933	0.181429	0.985882	Any process of posttranscriptional gene inactivation (silencing) mediated by small RNA molecules that may trigger mRNA degradation or negatively regulate translation	0.471391	-0.312655	AJUBA, CNOT8, AGO2, CELF1, FXR1, SMAD3, TNRC6B, CNOT6	SMAD1
GO:0031023	microtubule organizing center organizati...	104	9	2.64	1379	0.00127	0.17905	0.181429	1	A process that is carried out at the cellular level which results in the assembly, arrangement of constituent parts, or disassembly of a microtubule organizing center, a structure from which microtubules grow	0.671245	-0.336854	XPO1, SASS6, CHORDC1, CDK1, SLC16A1, USP33, PCLAF, PKD2, CTNNB1, VPS4B, CCP110, PPP1R12A, GEN1, ROCK2, PDCD6IP, BRCA1, CHMP2B, CETN3, RANBP1	WDR62, PARD6A, BRSK1
GO:1902905	positive regulation of supramolecular fi...	104	9	2.64	324	0.00127	0.03948	0.181429	0.985882	Any process that activates or increases the frequency, rate or extent of fibril organization	0.760309	-0.401897	SLAIN2, TGFBR1, ARPC1B, ARF6, GMFB, EDN1, RICTOR, ARPC5, CDKN1B, ARFIP1, BAG4, PRKCE, FER, SMAD3, ABI2	CORO1A, WASL
GO:0007346	regulation of mitotic cell cycle	401	21	10.19	33	0.0013	0.00509	0.183099	0.985882	Any process that modulates the rate or extent of progress through the mitotic cell cycle	0.789674	-0.530034	PKN2, GIGYF2, ATF2, NEK7, PHIP, ATM, EDN1, CDK1, DDX3X, TOPBP1, FOXN3, CDK8, CUL4B, ADAM17, CDKN1B, CNOT8, PKD2, SIRT1, TOP2A, RINT1, CTNNB1, RB1, VPS4B, ANLN, CDC27, RAD21, BORA, ANKRD17, ZFP36L2, SOX4, CDKN2B, SENP2, NBN, GEN1, RPA3, SMAD3, CDC7, LSM11, CDC73, CHMP2B, NDC80, RANBP1, TOP2B, CNOT6, DYNLT3, BECN1	CDK11A, PTCH1, TMEM8B, MRNIP, ID2, CARM1, GBF1, PLK3, SIN3A, CLSPN, XPC
GO:0016441	posttranscriptional gene silencing	49	6	1.25	625	0.00141	0.07308	0.193151	0.985882	The inactivation of gene expression by a posttranscriptional mechanism	0.528092	-0.312655	GIGYF2, AJUBA, CNOT8, AGO2, CELF1, FXR1, SMAD3, TNRC6B, CNOT6	SMAD1
GO:1901888	regulation of cell junction assembly	49	6	1.25	394	0.00141	0.04908	0.193151	0.985882	Any process that modulates the frequency, rate or extent of cell junction assembly	0.531393	-0.415852	PHLDB2, GJA1, ROCK1, SNAI2, PTK2, ROCK2, SMAD3	FZD5, SRC
GO:0010952	positive regulation of peptidase activit...	106	9	2.69	2983	0.00146	0.5286	0.197297	1	Any process that increases the frequency, rate or extent of peptidase activity, the hydrolysis of peptide bonds within proteins	0.570488	-0.291324	CARD8, DDX3X, REST, CDKN1B, PICALM, SIRT1, SENP1, EIF2AK3, ARL6IP5, SMAD3, CYR61, F2R
GO:0052547	regulation of peptidase activity	197	13	5.01	1380	0.00151	0.17979	0.198718	1	Any process that modulates the frequency, rate or extent of peptidase activity, the hydrolysis of peptide bonds within proteins	0.715689	-0.417303	CRIM1, RPS6KA3, KLF4, CARD8, DDX3X, BIRC6, TNFAIP8, REST, FNIP1, CDKN1B, PICALM, SIRT1, TFPI, SENP1, EIF2AK3, ARL6IP1, SH3RF1, ARL6IP5, SMAD3, CYR61, F2R, PRDX3	WFIKKN1, SRC, GAS6, POR
GO:0051893	regulation of focal adhesion assembly	34	5	0.86	626	0.00155	0.07383	0.198718	0.985882	Any process that modulates the frequency, rate or extent of focal adhesion formation, the establishment and maturation of focal adhesions	0.464325	-0.27416	PHLDB2, ROCK1, PTK2, ROCK2, SMAD3	SRC
GO:0090109	regulation of cell-substrate junction as...	34	5	0.86	627	0.00155	0.07383	0.198718	0.985882	Any process that modulates the rate, frequency, or extent of cell-substrate junction assembly. Cell-substrate junction assembly is the aggregation, arrangement and bonding together of a set of components to form a junction between a cell and its substrate	0.464325	-0.27416	PHLDB2, ROCK1, PTK2, ROCK2, SMAD3	SRC
GO:0098609	cell-cell adhesion	325	18	8.26	250	0.00155	0.02573	0.198718	0.985882	The attachment of one cell to another cell via adhesion molecules	0.81933	-0.650033	DENND6A, ADAM9, CLDN12, CDK5R1, PRKAR1A, CDH2, ITGA4, CADM1, KLF4, DUSP10, FNDC3A, DSC2, RICTOR, PARVA, CD2AP, AJUBA, DSG2, STXBP3, CD24, SOCS5, CTNNB1, GCNT1, CYP1B1, ROCK1, ZC3H8, EFNB2, CTNND1, SNAI2, YES1, MAP3K7, PTK2, CLDN11, CDH12, ITGAV, CD47, PRKG1, FER, GLMN, RAB10, CYR61, TRAF6, NRXN3, CD58, ITGA6, CD55, CDH3, CTNNA1, CD46, PDLIM5, CNN3, WNT5A	NECTIN1, CORO1A, SLC7A11, IGFBP2, EFNB1, TYRO3, PLXNB3, FLNA, ITGB3, CD274, SRC, ZEB1, GAS6, ATP2C1, LAG3, HLX, CD83, CD34, ICAM3, ZBTB7B, SCARF2, GLI2
GO:0071826	ribonucleoprotein complex subunit organi...	175	12	4.45	71	0.00165	0.01074	0.208537	0.985882	Any process in which macromolecules aggregate, disaggregate, or are modified, resulting in the formation, disassembly, or alteration of a ribonucleoprotein complex	0.797897	-0.35892	G3BP2, DDX20, PRPF39, NUFIP1, ATM, KIF5B, DDX3X, PSIP1, PTBP2, DDX6, AGO2, CELF1, DENR, SRSF1, PTGES3, YTHDC1, PAN3, CDC73, SNRPE, RBM22, RPF1, CNOT6	RRP7BP, SRPK3, KLC1
GO:0000377	RNA splicing, via transesterification re...	275	16	6.99	4007	0.0017	1	0.208537	1	Splicing of RNA via a series of two transesterification reactions with a bulged adenosine residue from the intron branch point as the initiating nucleophile. When the initial RNA for the splicing reaction is a single molecule (cis splicing), the excised intron is released in a lariat structure	0.772504	-0.429201	DDX20, PRPF39, MBNL2, NUDT21, ELAVL2, PSIP1, LSM5, HNRNPA3, PTBP2, PNN, CELF1, WTAP, SRSF1, YTHDC1, KHDRBS1, DYRK1A, CWC15, MAGOHB, RNPC3, PAPOLA, GTF2F2, SNRPE, SFPQ, POLR2K, CWC27, RBM22, NSRP1, PPIL1	MTREX, AC009690.3, SRPK3, PRPF40B, WDR33
GO:0000398	mRNA splicing, via spliceosome	275	16	6.99	53	0.0017	0.00829	0.208537	0.985882	The joining together of exons from one or more primary transcripts of messenger RNA (mRNA) and the excision of intron sequences, via a spliceosomal mechanism, so that mRNA consisting only of the joined exons is produced	0.772504	-0.429201	DDX20, PRPF39, MBNL2, NUDT21, ELAVL2, PSIP1, LSM5, HNRNPA3, PTBP2, PNN, CELF1, WTAP, SRSF1, YTHDC1, KHDRBS1, DYRK1A, CWC15, MAGOHB, RNPC3, PAPOLA, GTF2F2, SNRPE, SFPQ, POLR2K, CWC27, RBM22, NSRP1, PPIL1	MTREX, AC009690.3, SRPK3, PRPF40B, WDR33
GO:2000116	regulation of cysteine-type endopeptidas...	130	10	3.3	2475	0.00171	0.38721	0.208537	1	Any process that modulates the frequency, rate or extent of cysteine-type endopeptidase activity	0.647128	-0.35725	RPS6KA3, KLF4, CARD8, DDX3X, TNFAIP8, REST, FNIP1, CDKN1B, SIRT1, SENP1, EIF2AK3, ARL6IP1, SH3RF1, ARL6IP5, SMAD3, CYR61, F2R, PRDX3	SRC, GAS6, POR
GO:0032880	regulation of protein localization	585	27	14.87	774	0.0018	0.07824	0.210638	1	Any process that modulates the frequency, rate or extent of any process in which a protein is transported to, or maintained in, a specific location	1.05962	-0.671064	UFL1, IL1RAP, SERP1, G3BP2, CENPQ, WWTR1, ADAM9, TGFBR1, NMD3, CLOCK, XPO1, BNIP3L, UHMK1, CDK5R1, UBE2J1, GJA1, ERLEC1, ARF6, CDH2, UGCG, KIF5B, LGR4, CADM1, CTDSPL2, CDK1, SLC16A1, CARD8, C2CD5, NDFIP2, CD2AP, HIF1A, MARCKS, REST, STX6, NUP58, RIOK2, PICALM, PKD2, TAX1BP3, SIRT1, CTNNB1, YWHAG, RB1, CCNE2, PRKCI, SNAI2, IRS1, CHUK, ARFIP1, BORA, FBXW11, DNAJA1, EIF2AK3, EXOC1, BAG4, PRKCE, SOX4…	FZD5, GPR68, TRPM4, WASL, FLNA, RABGAP1L, PTCH1, CD274, IL17RC, PRELID3A, SRC, CLIP3, GAS6, GBF1, PLK3, GNL3L, LYPLA1, TONSL, SIN3A, CD34, RBCK1, PARD6A, GLIS2
GO:0034329	cell junction assembly	131	10	3.33	248	0.00181	0.02555	0.210638	0.985882	A cellular process that results in the aggregation, arrangement and bonding together of a set of components to form a cell junction	0.674514	-0.605123	PKN2, PHLDB2, GJA1, AJUBA, HEG1, CTNNB1, ROCK1, PRKCI, SNAI2, PTK2, PTPRK, ROCK2, SMAD3, PDCD6IP, LAMC2, ITGA6, CTNNA1, LAMA3, GNPAT	FZD5, ITGB4, FLNA, LAMA5, ITGB3, SRC, PLEC, FBF1, TESK2, PARD6A
GO:0010950	positive regulation of endopeptidase act...	89	8	2.26	4008	0.00185	1	0.210638	1	Any process that increases the frequency, rate or extent of endopeptidase activity, the endohydrolysis of peptide bonds within proteins	0.556485	-0.274099	CARD8, DDX3X, REST, CDKN1B, SIRT1, SENP1, EIF2AK3, ARL6IP5, SMAD3, CYR61, F2R
GO:0032879	regulation of localization	1284	49	32.63	2342	0.00186	0.35743	0.210638	1	Any process that modulates the frequency, rate or extent of any process in which a cell, a substance, or a cellular entity is transported to, or maintained in, a specific location	1.11623	-1.30731	UFL1, IL1RAP, SERP1, G3BP2, PRKAA1, PKN2, PTPRG, CENPQ, WWTR1, PHLDB2, ADAM9, TGFBR1, CLIC4, NMD3, CLOCK, XPO1, SRGAP2C, STAM, BNIP3L, UHMK1, CDK5R1, UBE2J1, ARHGAP18, GJA1, ERLEC1, ARF6, OSBPL8, RAB8B, CDH2, UGCG, KIF5B, LGR4, IBTK, DNAJC6, RAB5A, ITGA4, CADM1, CTDSPL2, EEF2K, TRPC1, EDN1, KLF4, TBC1D9, CDK1, SLC16A1, CARD8, PTP4A1, C2CD5, DSC2, NUS1, PPP1CC, NDFIP2, PDGFC, SLC30A7, CD2AP, HIF1A…	CRYAB, SPP1, FZD5, CNIH2, HMOX1, GPR68, GRIN2D, SLC30A3, CORO1A, CSF1, RAB4B-EGLN2, EHD3, TRPM4, WASL, ABCA7, PLTP, PLXNB3, TBC1D3L, SEC24B, FLNA, RABGAP1L, PTCH1, LAMA5, ITGB3, CD274, IL17RC, PRELID3A, LRSAM1, SRC, CLIP3, PLXNA1, GAS6, COL18A1, IL6R, GBF1, SLC30A1, ADAM15, PLK3, SCN1B, ENPP2, MYO6, GNL3L, MCOLN1, LYPLA1, TONSL, SIN3A, RASGRF1, CD34, ARAP1, STX1B, PRKX, RBCK1, PARD6A, GLIS2, SRGA…
GO:0000082	G1/S transition of mitotic cell cycle	202	13	5.13	70	0.0019	0.01066	0.210638	0.985882	The mitotic cell cycle transition by which a cell in G1 commits to S phase. The process begins with the build up of G1 cyclin-dependent kinase (G1 CDK), resulting in the activation of transcription of G1 cyclins. The process ends with the positive feedback of the G1 cyclins on the G1 CDK which commits the cell to S phase, in which DNA replication is initiated	0.727096	-0.392594	CUL5, GIGYF2, ATM, BACH1, CDK1, DDX3X, SKP2, CUL4B, NPAT, ADAM17, CDKN1B, CNOT8, PKD2, RB1, CCNE2, ANKRD17, SOX4, CDKN2B, SENP2, RPA3, CDC7, LSM11, PPP6C, CDC73, RANBP1, ZPR1, CNOT6	ID2, CARM1, PLK3
GO:0032241	positive regulation of nucleobase-contai...	3	2	0.08	4009	0.0019	1	0.210638	1	Any process that activates or increases the frequency, rate or extent of the directed movement of nucleobases, nucleosides, nucleotides and nucleic acids, into, out of or within a cell, or between cells, by means of some agent such as a transporter or pore	0.489015	0.489015	RIOK2, KHDRBS1
GO:0046833	positive regulation of RNA export from n...	3	2	0.08	9	0.0019	0.0019	0.210638	0.985882	Any process that activates or increases the frequency, rate or extent of directed movement of RNA from the nucleus into the cytoplasm	0.489015	0.489015	RIOK2, KHDRBS1
GO:0002433	immune response-regulating cell surface ...	52	6	1.32	4010	0.00193	1	0.210638	1	An immune response-regulating cell surface receptor signaling pathway that contributes to the endocytic engulfment of external particulate material by phagocytes	0.488726	-0.32822	ARPC1B, ARPC5, YES1, PTK2, PRKCE	WASL, SRC
GO:0038096	Fc-gamma receptor signaling pathway invo...	52	6	1.32	10	0.00193	0.00193	0.210638	0.985882	An Fc-gamma receptor signaling pathway that contributes to the endocytic engulfment of external particulate material by phagocytes	0.488726	-0.32822	ARPC1B, ARPC5, YES1, PTK2, PRKCE	WASL, SRC
GO:0030036	actin cytoskeleton organization	359	19	9.12	1202	0.00195	0.15484	0.210638	1	A process that is carried out at the cellular level which results in the assembly, arrangement of constituent parts, or disassembly of cytoskeletal structures comprising actin filaments and their associated proteins	0.871591	-0.553502	PHLDB2, COBLL1, TGFBR1, MAP3K1, ARPC1B, CDK5R1, ARHGAP18, ARF6, MAP3K2, PRKAR1A, GMFB, EDN1, SSH2, MYO1B, CORO2A, RICTOR, PARVA, CD2AP, MARCKS, ARPC5, GAS2L3, MTPN, MYPN, OPHN1, ROCK1, PRKCI, PLS3, CAPZA1, ARFIP1, KRAS, EPB41L2, FCHSD2, BAG4, PRKCE, PRKG1, FER, RACGAP1, ROCK2, SMAD3, PDCD6IP, SMAD4, EPB41L4A, CTNNA1, ABI2, CNN3, MYOM2, TRIM32, TTC17	CORO1A, WASL, FLNA, MKLN1, SRC, INF2, TMOD1, ATP2C1, ARHGDIA, ALMS1, FHOD3, TESK2, ARAP1
GO:0097435	supramolecular fiber organization	332	18	8.44	1349	0.00196	0.17452	0.210638	1	A process that is carried out at the cellular level which results in the assembly, arrangement of constituent parts, or disassembly of fibrils, insoluble fibrous aggregates consisting of polysaccharides and/or proteins	0.938753	-0.908378	SLAIN2, AGFG1, PHLDB2, COBLL1, TGFBR1, ARPC1B, MZT1, CEP126, ARHGAP18, ARF6, PRKAR1A, GMFB, HOOK3, EDN1, SSH2, MYO1B, FIGNL1, LOX, RICTOR, MARCKS, ARPC5, P4HA1, COL3A1, CDKN1B, KIF18A, MTPN, MYPN, CYP1B1, ROCK1, PRKCI, PLS3, CAPZA1, ARFIP1, FCHSD2, BAG4, PRKCE, FER, COL5A2, ROCK2, SMAD3, SMAD4, CTNNA1, CRIPT, NIN, ABI2, MYOM2, RANBP9, TTC17	CRYAB, STMN3, CORO1A, WASL, FLNA, COL1A2, SRC, CLIP3, TMOD1, AXIN1, PLK3, COL11A1, ALMS1, FHOD3, ARAP1, SCX
GO:0007155	cell adhesion	589	27	14.97	905	0.00198	0.10438	0.210638	1	The attachment of a cell, either to another cell or to an underlying substrate such as the extracellular matrix, via cell adhesion molecules	0.966394	-0.959336	PKN2, DENND6A, PPP1CB, EDIL3, PHLDB2, ADAM9, CLDN12, CDK5R1, ARF6, PRKAR1A, CDH2, ITGA4, CADM1, KLF4, DUSP10, FNDC3A, DSC2, VCAN, RICTOR, PARVA, CD2AP, COL3A1, AJUBA, ADAM17, DSG2, STXBP3, EPHA4, CD24, SOCS5, CTNNB1, UTRN, GCNT1, CYP1B1, PNN, ROCK1, ZC3H8, PPP1R12A, EFNB2, NET1, CTNND1, SNAI2, YES1, MAP3K7, PTK2, CLDN11, ITGB3BP, CDH12, ITGAV, TIMM10B, CD47, BAG4, PRKCE, PRKG1, PTPRK, FER, GLMN, …	SPP1, IGFBP7, ITGB4, NECTIN1, CORO1A, CSF1, SLC7A11, IGFBP2, BOC, COL6A2, EFNB1, TYRO3, PLXNB3, FLNA, LAMA5, ITGB3, CD274, TMEM8B, MKLN1, SRC, ZEB1, GAS6, ATP2C1, COL18A1, LRFN3, LAG3, HLX, CD83, ADAM15, ARHGDIA, SCN1B, TESK2, CD34, ICAM3, PRKX, ZBTB7B, SCARF2, GLI2
GO:0016071	mRNA metabolic process	590	27	14.99	2495	0.00203	0.39821	0.2125	1	The chemical reactions and pathways involving mRNA, messenger RNA, which is responsible for carrying the coded genetic 'message', transcribed from DNA, to sites of protein assembly at the ribosomes	0.908503	-0.519669	DDX20, PRPF39, MBNL2, QKI, GTF2H2, ZRANB2, PRPF38B, NUDT21, ELAVL2, ATM, PSIP1, LSM5, HIF1A, HNRNPA3, CNOT8, C5AR1, PTBP2, RPL21, THOC7, DDX6, PNN, AGO2, CELF1, WTAP, POLR3K, ZNF326, RNGTT, SRSF1, YTHDC1, PNRC2, KHDRBS1, DYRK1A, BAG4, ZFP36L2, CWC15, RNF20, TOB1, PPP4R2, MAGOHB, PAN3, RNPC3, TSEN2, TSEN15, LSM11, PAPOLA, GTF2F2, CDC73, SNRPE, SFPQ, POLR2K, RPS3A, CWC27, RPS25, RBM22, NSRP1, PTBP3…	CDK11A, MTREX, FLNA, AC009690.3, SRPK3, PRPF40B, DHX34, HIPK3, WDR33
GO:0043254	regulation of protein complex assembly	254	15	6.45	1780	0.00204	0.24658	0.2125	1	Any process that modulates the frequency, rate or extent of protein complex assembly	0.802441	-0.849545	SLAIN2, GTF2H2, ARPC1B, ARHGAP18, ARF6, CAND1, GMFB, DDX3X, CUL4B, RICTOR, ARPC5, AJUBA, FNIP1, CDKN1B, MTPN, CTNNB1, TAF1, ATF7IP, CAPZA1, ARFIP1, FCHSD2, BAG4, PRKCE, FER, ZNF451, RPA3, GTF2F2, RALB, ABI2	CRYAB, CORO1A, WASL, SRC, CLIP3, MED25, TMOD1, FHOD3, CTNNBIP1, STX1B
GO:0038094	Fc-gamma receptor signaling pathway	53	6	1.35	4011	0.00213	1	0.216981	1	A series of molecular signals initiated by the binding of the Fc portion of immunoglobulin G (IgG) to an Fc-gamma receptor on the surface of a signal-receiving cell, and ending with regulation of a downstream cellular process, e.g. transcription. The Fc portion of an immunoglobulin is its C-terminal constant region	0.488726	-0.32822	ARPC1B, ARPC5, YES1, PTK2, PRKCE	WASL, SRC
GO:0007163	establishment or maintenance of cell pol...	112	9	2.85	12	0.00214	0.00214	0.216981	0.985882	Any cellular process that results in the specification, formation or maintenance of anisotropic intracellular organization or cell growth patterns	0.611903	-0.39974	CLIC4, ARF6, RICTOR, PARVA, ARPC5, ROCK1, PRKCI, PTK2, ROCK2, RAB10, PDCD6IP, NDC80, CTNNA1, SPDL1, WNT5A	DLG3, GBF1, FBF1, BRSK1
GO:0022610	biological adhesion	593	27	15.07	920	0.00218	0.10989	0.216981	1	The attachment of a cell or organism to a substrate or other organism	0.966394	-0.959336	PKN2, DENND6A, PPP1CB, EDIL3, PHLDB2, ADAM9, CLDN12, CDK5R1, ARF6, PRKAR1A, CDH2, ITGA4, CADM1, KLF4, DUSP10, FNDC3A, DSC2, VCAN, RICTOR, PARVA, CD2AP, COL3A1, AJUBA, ADAM17, DSG2, STXBP3, EPHA4, CD24, SOCS5, CTNNB1, UTRN, GCNT1, CYP1B1, PNN, ROCK1, ZC3H8, PPP1R12A, EFNB2, NET1, CTNND1, SNAI2, YES1, MAP3K7, PTK2, CLDN11, ITGB3BP, CDH12, ITGAV, TIMM10B, CD47, BAG4, PRKCE, PRKG1, PTPRK, FER, GLMN, …	SPP1, IGFBP7, ITGB4, NECTIN1, CORO1A, CSF1, SLC7A11, IGFBP2, BOC, COL6A2, EFNB1, TYRO3, PLXNB3, FLNA, LAMA5, ITGB3, CD274, TMEM8B, MKLN1, SRC, ZEB1, GAS6, ATP2C1, COL18A1, LRFN3, LAG3, HLX, CD83, ADAM15, ARHGDIA, SCN1B, TESK2, CD34, ICAM3, PRKX, ZBTB7B, SCARF2, GLI2
GO:0031589	cell-substrate adhesion	181	12	4.6	513	0.0022	0.05379	0.216981	0.985882	The attachment of a cell to the underlying substrate via adhesion molecules	0.725645	-0.633979	EDIL3, PHLDB2, ADAM9, ITGA4, PARVA, COL3A1, AJUBA, CTNNB1, UTRN, ROCK1, NET1, PTK2, ITGAV, TIMM10B, PRKCE, PTPRK, FER, ROCK2, SMAD3, CYR61, ITGA6, GBP1, TIAM1, DOCK5	ITGB4, CORO1A, CSF1, TYRO3, FLNA, LAMA5, ITGB3, TMEM8B, MKLN1, SRC, GAS6, ADAM15, TESK2, CD34, PRKX
GO:0032956	regulation of actin cytoskeleton organiz...	181	12	4.6	2904	0.0022	0.50922	0.216981	1	Any process that modulates the frequency, rate or extent of the formation, arrangement of constituent parts, or disassembly of cytoskeletal structures comprising actin filaments and their associated proteins	0.80614	-0.481539	PHLDB2, TGFBR1, ARPC1B, CDK5R1, ARHGAP18, ARF6, GMFB, EDN1, SSH2, RICTOR, CD2AP, ARPC5, MTPN, ROCK1, CAPZA1, ARFIP1, FCHSD2, BAG4, PRKCE, FER, ROCK2, SMAD3, SMAD4, ABI2	CORO1A, WASL, TMOD1, ARHGDIA, ALMS1, FHOD3, ARAP1
GO:0010942	positive regulation of cell death	391	20	9.94	2873	0.00223	0.49912	0.216981	1	Any process that increases the rate or frequency of cell death. Cell death is the specific activation or halting of processes within a cell so that its vital functions markedly cease, rather than simply deteriorating gradually over time, which culminates in cell death	0.819146	-0.730423	DDX20, TGFBR1, BNIP3L, CDK5R1, ATF2, SKIL, ATM, RARB, CARD8, DDX3X, EEF1E1, TNFAIP8, REST, FNIP1, CDKN1B, PICALM, SIRT1, TOP2A, CTNNB1, YWHAG, CYP1B1, ZC3H8, SENP1, NET1, PRKCI, MSX2, SUDS3, DNAJA1, EIF2AK3, ITGB3BP, SOX4, ARL6IP5, SMAD3, CYR61, EIF2S1, TRAF6, MAP3K20, ITGA6, FOXO3, SFPQ, CTNNA1, SIAH1, TIAM1, F2R, WNT5A, STK3	OSGIN1, HMOX1, PLEKHG5, ADAMTSL4, PLEKHF1, MAP3K10, MAP3K9, CD274, SRC, CLIP3, COL18A1, NQO1, RBCK1
GO:1903391	regulation of adherens junction organiza...	37	5	0.94	813	0.00228	0.09654	0.216981	1	Any process that modulates the frequency, rate or extent of adherens junction organization	0.464325	-0.302872	PHLDB2, ROCK1, PTK2, ROCK2, SMAD3	SRC
GO:0010592	positive regulation of lamellipodium ass...	11	3	0.28	13	0.0023	0.0023	0.216981	0.985882	Any process that increases the rate, frequency or extent of the formation of a lamellipodium, a thin sheetlike extension of the surface of a migrating cell	0.122384	0.0571552
GO:0045730	respiratory burst	11	3	0.28	951	0.0023	0.11984	0.216981	1	A phase of elevated metabolic activity, during which oxygen consumption increases; this leads to the production, by an NADH dependent system, of hydrogen peroxide (H2O2), superoxide anions and hydroxyl radicals	0.156392	0.0351126	DUSP10, CD24, CD55	NOXA1
GO:1902903	regulation of supramolecular fiber organ...	182	12	4.63	2935	0.0023	0.51693	0.216981	1	Any process that modulates the frequency, rate or extent of fibril organization	0.836048	-0.818603	SLAIN2, PHLDB2, TGFBR1, ARPC1B, ARHGAP18, ARF6, GMFB, EDN1, SSH2, RICTOR, ARPC5, CDKN1B, MTPN, ROCK1, CAPZA1, ARFIP1, FCHSD2, BAG4, PRKCE, FER, ROCK2, SMAD3, SMAD4, ABI2	CRYAB, CORO1A, WASL, CLIP3, TMOD1, ALMS1, FHOD3, ARAP1
GO:0002431	Fc receptor mediated stimulatory signali...	54	6	1.37	4012	0.00235	1	0.219626	1	A series of molecular signals generated as a consequence of a the binding of the Fc portion of an immunoglobulin by an Fc receptor capable of activating or perpetuating an immune response. The Fc portion of an immunoglobulin is its C-terminal constant region	0.488726	-0.32822	ARPC1B, ARPC5, YES1, PTK2, PRKCE	WASL, SRC
GO:0007098	centrosome cycle	73	7	1.86	14	0.00245	0.00245	0.226852	0.985882	The cell cycle process in which centrosome duplication and separation takes place. The centrosome cycle can operate with a considerable degree of independence from other processes of the cell cycle	0.643621	-0.286073	XPO1, SASS6, CHORDC1, CDK1, USP33, PKD2, CTNNB1, VPS4B, CCP110, GEN1, ROCK2, PDCD6IP, BRCA1, CHMP2B, CETN3, RANBP1	WDR62, BRSK1
GO:0006397	mRNA processing	395	20	10.04	2234	0.00251	0.33498	0.229091	1	Any process involved in the conversion of a primary mRNA transcript into one or more mature mRNA(s) prior to translation into polypeptide	0.900989	-0.489664	DDX20, PRPF39, MBNL2, QKI, GTF2H2, ZRANB2, PRPF38B, NUDT21, ELAVL2, PSIP1, LSM5, HNRNPA3, PTBP2, THOC7, PNN, CELF1, WTAP, ZNF326, RNGTT, SRSF1, YTHDC1, KHDRBS1, DYRK1A, CWC15, RNF20, PPP4R2, MAGOHB, PAN3, RNPC3, TSEN2, TSEN15, LSM11, PAPOLA, GTF2F2, CDC73, SNRPE, SFPQ, POLR2K, CWC27, RBM22, NSRP1, PTBP3, ZPR1, PPIL1	CDK11A, MTREX, AC009690.3, SRPK3, PRPF40B, WDR33
GO:0051179	localization	3391	107	86.18	1052	0.00252	0.12936	0.229091	1	Any process in which a cell, a substance, or a cellular entity, such as a protein complex or organelle, is transported to or maintained in a specific location	1.21309	-1.4097	ABCB10, SLC4A7, UFL1, GDAP1, IL1RAP, SERP1, NXT2, G3BP2, PRKAA1, PKN2, CCDC91, PLEKHF2, AGFG1, KCNK1, ACBD3, TMED7, TIMM17A, CUL5, PTPRG, DDX20, CENPQ, CHML, WWTR1, SLC25A24, CCDC14, PHLDB2, ADAM9, QKI, TGFBR1, GTF2H2, FAM126A, CLIC4, PARP11, NMD3, YPEL5, CLOCK, ARPC1B, GOLT1B, SLCO1B3, TRAM1, CACHD1, XPO1, MZT1, MFSD14A, SRGAP2C, STAM, BNIP3L, UHMK1, CDK5R1, SLC5A3, DNAAF4, ATF2, AGL, UBE2J1, TR…	CRYAB, SPP1, PANX2, FZD5, CNIH2, HOXB9, HMOX1, LTB4R2, ITGB4, PLEKHG5, GPR68, SCART1, GRIN2D, TCN2, SLC9A3, NECTIN1, SLC30A3, CORO1A, CSF1, RAB4B-EGLN2, EHD3, SLC12A6, SLC7A11, AP5B1, LAT2, TRPM4, KIF13B, WASL, PPIL2, SLC22A18, CHIC1, PLEKHF1, EFNB1, SLC6A9, ABCA7, DPP7, PLTP, TYRO3, PLXNB3, MAN2B1, SLC26A10, MGST1, TBC1D3L, SEC24B, ATP1A3, FLNA, SIL1, RABGAP1L, CALHM2, PTCH1, LAMA5, FTH1, ITGB3,…
GO:0044843	cell cycle G1/S phase transition	209	13	5.31	89	0.00256	0.01361	0.230357	0.985882	The cell cycle process by which a cell in G1 phase commits to S phase	0.727096	-0.392594	CUL5, GIGYF2, ATM, BACH1, CDK1, DDX3X, SKP2, CUL4B, NPAT, ADAM17, CDKN1B, CNOT8, PKD2, RB1, TAF1, CCNE2, ANKRD17, SOX4, CDKN2B, SENP2, RPA3, CDC7, LSM11, PPP6C, CDC73, RANBP1, ZPR1, CNOT6	ID2, CARM1, PLK3
GO:0044093	positive regulation of molecular functio...	1138	44	28.92	1617	0.00258	0.20891	0.230357	1	Any process that activates or increases the rate or extent of a molecular function, an elemental biological activity occurring at the molecular level, such as catalysis or binding	1.06978	-0.758424	PRKAR2B, IL1RAP, PRKAA1, DENND6A, AGFG1, CHML, DCUN1D4, ADAM9, TGFBR1, DSCC1, ARHGAP12, CLOCK, MAP3K1, SRGAP2C, CDK5R1, ATF2, ELMOD2, TRAPPC13, FAM13B, NEK7, DENND5B, ARHGAP18, MAP3K2, MAP4K5, PRKAR1A, OSBPL8, KIF5B, MAP4K3, GMFB, TOR1AIP2, EDN1, KLF4, TBC1D9, CDK1, CARD8, BMI1, RALGPS2, DDX3X, RASA2, USP33, PDGFC, RICTOR, CCNC, HIF1A, SGK3, REST, AJUBA, ADAM17, PSPN, FNIP1, CDKN1B, PICALM, PKD2,…	FZD5, PLEKHG5, GRIN2D, CSF1, EHD3, CRTC1, PILRB, SLX4, ZNF16, MAP3K10, MAP3K9, TBC1D3L, DEPDC5, RABGAP1L, ITGB3, MRNIP, SRC, MED25, NOXA1, RGS3, AMH, RALGDS, GAS6, CARM1, AXIN1, GBF1, IKBKG, ARHGDIA, TRAPPC9, CAMKK1, GNL3L, PNKP, RFNG, ARHGAP45, RASGRF1, CLSPN, ARAP1, AGRN, SBF1, MED16, RBCK1, MYO9A, SRGAP1, VPS9D1, POR
GO:0009605	response to external stimulus	945	38	24.02	1345	0.00269	0.1728	0.237719	1	Any process that results in a change in state or activity of a cell or an organism (in terms of movement, secretion, enzyme production, gene expression, etc.) as a result of an external stimulus	1.00257	-1.23431	GDAP1, PRKAA1, PPP1CB, PHLDB2, ADAM9, BCHE, ERAP1, CLOCK, MAP3K1, BNIP3L, CDK5R1, ELMOD2, AGL, ASH1L, FBXL3, RPS6KA3, DENND5B, RMI1, GJA1, MAP3K2, LRP11, KIF5B, CREBZF, EDN1, KLF4, DUSP10, SLC16A1, NR1D2, POLR3G, DDX3X, USP33, HMGCS1, DSC2, SKP2, RBPJ, PPP1CC, CPS1, RICTOR, NFIB, TRIM24, PARVA, COL3A1, ADAM17, PSPN, NRAS, ACSL4, FNIP1, PKD2, EPHA4, TBL1XR1, MTPN, CD24, SOCS5, SIRT1, TFPI, RYK, C5…	HTRA1, SPP1, FZD5, HOXB9, HMOX1, LTB4R2, PLEKHG5, SEMA6C, GRIN2D, NECTIN1, CORO1A, CSF1, OMA1, TRPM4, IGFBP2, BOC, CRTC1, WASL, ACTA2, TNFRSF25, EFNB1, WDR24, TYRO3, PLXNB3, MGST1, ISL2, DEPDC5, PTCH1, ITGB3, IL17RC, LRSAM1, GAS2L1, SRC, ID2, PLXNA1, GAS6, JUNB, NQO1, IL6R, GBF1, IKBKG, SCN1B, GPC1, ENPP2, COL11A1, ANKRD23, MTA1, SIN3A, CD34, SCX, GLI2, XPC, CMTM1, SEMA4F, SCG2, ISG15, POR
GO:0019058	viral life cycle	342	18	8.69	109	0.00271	0.01686	0.237719	0.985882	A set of processes which all viruses follow to ensure survival; includes attachment and entry of the virus particle, decoding of genome information, translation of viral mRNA by host ribosomes, genome replication, and assembly and release of viral particles containing the genome	0.728578	-0.482577	PKN2, XPO1, RAB5A, KPNA3, DDX3X, CHD1, DEK, REST, NUP58, KPNA1, TOP2A, RPL21, VPS4B, THOC7, DDX6, EFNB2, YTHDC2, UBP1, ITGAV, ROCK2, PDCD6IP, GTF2F2, CHMP2B, NUP160, CD55, POLR2K, RPS3A, CD46, RPS25, TRIM32, CCNT2, NUP155, NUCKS1	NECTIN1, TYRO3, ITGB3, LRSAM1, GAS6, ISG15
GO:0040011	locomotion	788	33	20.03	354	0.00278	0.04375	0.2408	0.985882	Self-propelled movement of a cell or organism from one location to another	0.943347	-0.842533	PKN2, PTPRG, PHLDB2, ADAM9, TGFBR1, CLIC4, SRGAP2C, CDK5R1, DNAAF4, ASH1L, ARHGAP18, OSBPL8, DNER, CDH2, KIF5B, ITGA4, EDN1, KLF4, CDK1, SLC16A1, PTP4A1, DNAAF2, USP33, PDGFC, NFIB, PARVA, CD2AP, HIF1A, SGK3, ARPC5, COL3A1, AJUBA, ADAM17, PSPN, NRAS, EPHA4, CD24, RYK, C5AR1, FGF2, MYPN, DPYSL2, CTNNB1, MYO5A, SOD2, VPS4B, GCNT1, OPHN1, CYP1B1, ROCK1, MYSM1, CCNYL1, EXT1, ANLN, EFNB2, NET1, SPAG9,…	HOXB9, HMOX1, LTB4R2, ITGB4, PLEKHG5, SEMA6C, NECTIN1, CORO1A, CSF1, SLC7A11, TRPM4, BOC, WASL, PPIL2, EFNB1, PLTP, TYRO3, PLXNB3, ISL2, FLNA, LAMA5, ITGB3, CD274, IL17RC, COL1A2, SRC, ID2, PLXNA1, GAS6, COL18A1, IL6R, GBF1, ADAM15, SCN1B, GPC1, DGKZ, ENPP2, CD34, GAS8, PRKX, GLI2, CMTM1, SRGAP1, SEMA4F, SCG2
GO:0006935	chemotaxis	237	14	6.02	1476	0.00285	0.18808	0.2408	1	The directed movement of a motile cell or organism, or the directed growth of a cell guided by a specific chemical concentration gradient. Movement may be towards a higher concentration (positive chemotaxis) or towards a lower concentration (negative chemotaxis)	0.664194	-0.790222	CDK5R1, KIF5B, EDN1, USP33, NFIB, PARVA, ADAM17, PSPN, NRAS, EPHA4, RYK, C5AR1, FGF2, DPYSL2, OPHN1, EXT1, EFNB2, PTK2, KRAS, ITGAV, FER, SMAD3, CYR61, NRXN3, SMAD4, SIAH1, RANBP9, TIAM1, WNT5A, KIF5C	HOXB9, LTB4R2, PLEKHG5, SEMA6C, NECTIN1, CORO1A, CSF1, TRPM4, BOC, EFNB1, PLXNB3, ISL2, ITGB3, IL17RC, SRC, PLXNA1, GAS6, IL6R, GBF1, SCN1B, GPC1, ENPP2, GLI2, CMTM1, SEMA4F, SCG2
GO:0007067	mitotic nuclear division	372	19	9.45	15	0.00291	0.00291	0.2408	0.985882	A cell cycle process comprising the steps by which the nucleus of a eukaryotic cell divides; the process involves condensation of chromosomal DNA into a highly compacted form. Canonically, mitosis produces two daughter nuclei whose chromosome complement is identical to that of the mother cell	0.795863	-0.578227	DSCC1, MZT1, CEP126, KNL1, CCNG1, PHIP, ATM, CHAMP1, EDN1, CDK1, BIRC6, NAA50, CD2AP, LRRCC1, CDKN1B, KIF18A, RB1, VPS4B, PPP1R12A, ANLN, CDC27, RAD21, ARPP19, BORA, VRK1, ITGB3BP, STAG2, MIS18BP1, GEN1, RACGAP1, CHMP2B, BRCC3, NDC80, CETN3, RANBP1, SKA1, SPDL1, DYNLT3, BECN1	AURKC, CDK11A, WASL, FLNA, FSD1, ABRAXAS2, WDR62, INCENP, NEDD1
GO:0044089	positive regulation of cellular componen...	290	16	7.37	2835	0.00291	0.48823	0.2408	1	Any process that activates or increases the frequency, rate or extent of cellular component biogenesis, a process that results in the biosynthesis of constituent macromolecules, assembly, and arrangement of constituent parts of a cellular component	0.928445	-0.552035	IL1RAP, SLAIN2, PHLDB2, TGFBR1, GTF2H2, ARPC1B, STAM, ARF6, ATM, CAND1, GMFB, EEF2K, EDN1, CUL4B, RICTOR, ARPC5, AJUBA, FNIP1, CDKN1B, RIOK2, CTNNB1, VPS4B, CCP110, TAF1, ROCK1, WDR43, RAB3GAP2, ARFIP1, BAG4, PRKCE, FER, PAN3, RPA3, SMAD3, PDCD6IP, NRXN3, GTF2F2, RALB, ABI2, CNOT6, BECN1	CORO1A, WASL, SLX4, LRRC24, LRSAM1, SRC, MED25, ARAP1, AGRN
GO:0051301	cell division	429	21	10.9	16	0.00294	0.00294	0.2408	0.985882	The process resulting in division and partitioning of components of a cell to form more cells; may or may not be accompanied by the physical separation of a cell into distinct, individually membrane-bounded daughter cells	0.85086	-0.594194	PKN2, PPP1CB, WWTR1, KNL1, NEK7, CCNG1, ARF6, CDK1, BIRC6, PPP1CC, PDGFC, CD2AP, LRRCC1, SPART, TOP2A, FGF2, BRIP1, RB1, VPS4B, CCP110, ANLN, RAD21, CCNE2, ARPP19, BORA, VRK1, ITGB3BP, SEPT10, STAG2, MIS18BP1, ZFP36L2, PRKCE, TOP1, RACGAP1, ROCK2, RAB10, CDC7, PDCD6IP, CHMP2B, BRCC3, NDC80, CETN3, RALB, MITD1, SKA1, SPDL1, CCNT2, DYNLT3, BECN1	AURKC, WASL, ZNF16, E2F8, PTCH1, FSD1, SEPT1, ABRAXAS2, ZFYVE26, PLK3, INCENP, NEDD1, PARD6A
GO:0042330	taxis	238	14	6.05	1486	0.00296	0.19235	0.2408	1	The directed movement of a motile cell or organism in response to an external stimulus	0.664194	-0.790222	CDK5R1, KIF5B, EDN1, USP33, NFIB, PARVA, ADAM17, PSPN, NRAS, EPHA4, RYK, C5AR1, FGF2, DPYSL2, OPHN1, EXT1, EFNB2, PTK2, KRAS, ITGAV, FER, SMAD3, CYR61, NRXN3, SMAD4, SIAH1, RANBP9, TIAM1, WNT5A, KIF5C	HOXB9, LTB4R2, PLEKHG5, SEMA6C, NECTIN1, CORO1A, CSF1, TRPM4, BOC, EFNB1, PLXNB3, ISL2, ITGB3, IL17RC, SRC, ID2, PLXNA1, GAS6, IL6R, GBF1, SCN1B, GPC1, ENPP2, GLI2, CMTM1, SEMA4F, SCG2
GO:0043065	positive regulation of apoptotic process	373	19	9.48	947	0.003	0.11795	0.2408	1	Any process that activates or increases the frequency, rate or extent of cell death by apoptotic process	0.819146	-0.730423	DDX20, TGFBR1, BNIP3L, CDK5R1, ATF2, SKIL, ATM, RARB, CARD8, DDX3X, EEF1E1, TNFAIP8, REST, FNIP1, CDKN1B, SIRT1, TOP2A, CTNNB1, YWHAG, CYP1B1, ZC3H8, SENP1, NET1, PRKCI, MSX2, SUDS3, DNAJA1, EIF2AK3, ITGB3BP, SOX4, ARL6IP5, SMAD3, CYR61, EIF2S1, TRAF6, MAP3K20, ITGA6, FOXO3, SFPQ, CTNNA1, SIAH1, TIAM1, F2R, WNT5A, STK3	OSGIN1, HMOX1, PLEKHG5, ADAMTSL4, PLEKHF1, MAP3K10, MAP3K9, CD274, SRC, CLIP3, COL18A1, NQO1, RBCK1
GO:0090153	regulation of sphingolipid biosynthetic ...	12	3	0.3	1392	0.00301	0.18473	0.2408	1	Any process that modulates the rate, frequency or extent of sphingolipid biosynthesis. Sphingolipid biosynthesis is the chemical reactions and pathways resulting in the formation of sphingolipids, any of a class of lipids containing the long-chain amine diol sphingosine or a closely related base (a sphingoid)	0.243256	0.0467464	PRKAA1, CYR61, SAMD8
GO:1905038	regulation of membrane lipid metabolic p...	12	3	0.3	1393	0.00301	0.18473	0.2408	1		0.243256	0.0467464	PRKAA1, CYR61, SAMD8
GO:2000303	regulation of ceramide biosynthetic proc...	12	3	0.3	1394	0.00301	0.18473	0.2408	1	Any process that modulates the frequency, rate or extent of a ceramide biosynthetic process	0.243256	0.0467464	PRKAA1, CYR61, SAMD8
GO:2000811	negative regulation of anoikis	12	3	0.3	17	0.00301	0.00301	0.2408	0.985882	Any process that stops, prevents or reduces the frequency, rate or extent of anoikis	0.205721	0.0207645	SNAI2, PTK2	SRC
GO:0044702	single organism reproductive process	608	27	15.45	18	0.0031	0.0031	0.246032	0.985882	A biological process that directly contributes to the process of producing new individuals, involving a single organism	0.980679	-1.14532	SMAD5, AGFG1, DDX20, SPIN4, QKI, TGFBR1, CLIC4, PARP11, CLOCK, UBE2J1, KNL1, ASH1L, GJA1, TMED2, SKIL, PRKAR1A, ATM, ACOX1, LGR4, LEMD3, CCNI, CADM1, EDN1, CDK1, TUBD1, FNDC3A, BIRC6, HMGCS1, RBPJ, HIF1A, ACSL4, CDKN1B, KIF18A, DSG2, PKD2, SIRT1, TOP2A, CTNNB1, BRIP1, DDX6, CCNYL1, TSNAX, CELF1, RAD21, SPAG9, CCNE2, MSX2, TOB2, SPA17, IFT81, H3F3A, PTK2, CLDN11, DNAJA1, TTC26, AFF4, ADCY7, STAG2,…	HTRA1, SPP1, IGFBP7, FZD5, AURKC, SLX4, RNF2, TYRO3, E2F8, MGST1, ARID4B, GGNBP1, TRIM36, AC138696.1, SMAD1, SRC, AMH, TESK1, JUNB, TFEB, KMT2B, ADAM15, ZFP41, TESK2, SBF1, SCX, GLI2, ZNF35, WDR33
GO:0043068	positive regulation of programmed cell d...	376	19	9.56	1039	0.00327	0.12401	0.25748	1	Any process that activates or increases the frequency, rate or extent of programmed cell death, cell death resulting from activation of endogenous cellular processes	0.819146	-0.730423	DDX20, TGFBR1, BNIP3L, CDK5R1, ATF2, SKIL, ATM, RARB, CARD8, DDX3X, EEF1E1, TNFAIP8, REST, FNIP1, CDKN1B, SIRT1, TOP2A, CTNNB1, YWHAG, CYP1B1, ZC3H8, SENP1, NET1, PRKCI, MSX2, SUDS3, DNAJA1, EIF2AK3, ITGB3BP, SOX4, ARL6IP5, SMAD3, CYR61, EIF2S1, TRAF6, MAP3K20, ITGA6, FOXO3, SFPQ, CTNNA1, SIAH1, TIAM1, F2R, WNT5A, STK3	OSGIN1, HMOX1, PLEKHG5, ADAMTSL4, PLEKHF1, MAP3K10, MAP3K9, CD274, SRC, CLIP3, COL18A1, NQO1, RBCK1
GO:0022618	ribonucleoprotein complex assembly	166	11	4.22	124	0.00334	0.02046	0.260937	0.985882	The aggregation, arrangement and bonding together of proteins and RNA molecules to form a ribonucleoprotein complex	0.777871	-0.32839	G3BP2, DDX20, PRPF39, NUFIP1, ATM, DDX3X, PSIP1, PTBP2, DDX6, AGO2, CELF1, DENR, SRSF1, PTGES3, YTHDC1, PAN3, CDC73, SNRPE, RBM22, RPF1, CNOT6	RRP7BP, SRPK3
GO:0048514	blood vessel morphogenesis	268	15	6.81	19	0.00341	0.00341	0.262595	0.985882	The process in which the anatomical structures of blood vessels are generated and organized. The blood vessel is the vasculature carrying blood	0.843752	-0.668112	QKI, TGFBR1, ERAP1, CLIC4, KLF5, HOXA3, CDH2, EDN1, KLF4, RBPJ, NUS1, LOX, PARVA, HIF1A, COL3A1, PKD2, SIRT1, C5AR1, FGF2, HEG1, CTNNB1, CYP1B1, ROCK1, EFNB2, UBP1, PTK2, EIF2AK3, ITGAV, SOX4, GLMN, ROCK2, CYR61, BRCA1, WNT5A, STAT1	FZD5, HMOX1, SLC12A6, E2F8, SEC24B, LAMA5, ITGB3, YAP1, COL18A1, JUNB, ADAM15, ENPP2, CD34, PRKX, SCG2
GO:0033157	regulation of intracellular protein tran...	242	14	6.15	20	0.00344	0.00344	0.262595	0.985882	Any process that modulates the frequency, rate or extent of the directed movement of proteins within cells	0.895993	-0.52084	G3BP2, WWTR1, TGFBR1, XPO1, BNIP3L, UHMK1, CDK5R1, UBE2J1, ERLEC1, UGCG, KIF5B, CTDSPL2, CDK1, C2CD5, NUP58, RIOK2, PKD2, SIRT1, SNAI2, FBXW11, BAG4, SOX4, SMAD3, SMAD4, OSCP1, PBLD, VAMP7, RBM22, ZPR1	FZD5, FLNA, PRELID3A, GAS6, PLK3, TONSL, RBCK1
GO:0048522	positive regulation of cellular process	2706	88	68.77	3360	0.00344	0.6616	0.262595	1	Any process that activates or increases the frequency, rate or extent of a cellular process, any of those that are carried out at the cellular level, but are not necessarily restricted to a single cell. For example, cell communication occurs among more than one cell, but occurs at the cellular level	1.16008	-1.27859	UFL1, PRKAR2B, IL1RAP, SMAD5, SLAIN2, SERP1, PRKAA1, PKN2, SH3D19, ATAD2B, GDF6, DDX20, WWTR1, DCUN1D4, PHLDB2, ADAM9, TGFBR1, DSCC1, GTF2H2, KLF5, NMD3, CLOCK, MAP3K1, HOXA3, ARPC1B, GOLT1B, SRGAP2C, POGLUT1, STAM, BNIP3L, UHMK1, CDK5R1, ATF2, ASH1L, SCOC, NEK7, RPS6KA3, FUBP3, FRMPD4, GJA1, PHIP, ARF6, MAP3K2, RBMS3, MED13, MAP4K5, SKIL, NUFIP1, RAB12, TNKS2, PRKAR1A, OSBPL8, RAB8B, HMGN5, CDH2…	HTRA1, SPP1, OSGIN1, FZD5, HOXB9, HMOX1, AURKC, PLEKHG5, GPR68, DYRK1B, TNFRSF19, ADAMTSL4, CORO1A, CSF1, TRPM4, IGFBP2, BOC, CRTC1, PILRB, PTH1R, WASL, SLX4, ZNF16, PLEKHF1, EFNB1, MAP3K10, ABCA7, MAP3K9, WDR24, PLXNB3, E2F8, CBFA2T2, FLNA, ARID4B, MZF1, PTCH1, ITGB3, CD274, NRF1, YAP1, LRRC24, IL17RC, PRELID3A, LRSAM1, MRNIP, ZNF567, SMAD1, FOXO6, SRC, CLIP3, MED25, ID2, ZEB1, GAS6, ZKSCAN3, FB…
GO:0048870	cell motility	675	29	17.15	66	0.00353	0.01014	0.262676	0.985882	Any process involved in the controlled self-propelled movement of a cell that results in translocation of the cell from one place to another	0.943347	-0.821125	PKN2, PTPRG, PHLDB2, ADAM9, TGFBR1, CLIC4, SRGAP2C, CDK5R1, DNAAF4, ASH1L, ARHGAP18, OSBPL8, DNER, CDH2, ITGA4, EDN1, KLF4, CDK1, SLC16A1, PTP4A1, DNAAF2, USP33, PDGFC, PARVA, CD2AP, HIF1A, SGK3, ARPC5, COL3A1, AJUBA, ADAM17, NRAS, EPHA4, CD24, C5AR1, FGF2, MYPN, CTNNB1, SOD2, GCNT1, OPHN1, CYP1B1, ROCK1, MYSM1, CCNYL1, ANLN, EFNB2, NET1, SPAG9, PRKCI, MSX2, SNAI2, YES1, PTK2, DNAJA1, KRAS, ITGAV…	HOXB9, HMOX1, LTB4R2, ITGB4, PLEKHG5, CORO1A, CSF1, SLC7A11, TRPM4, WASL, PPIL2, EFNB1, PLTP, TYRO3, PLXNB3, FLNA, LAMA5, ITGB3, CD274, IL17RC, COL1A2, SRC, PLXNA1, GAS6, COL18A1, IL6R, GBF1, ADAM15, GPC1, DGKZ, ENPP2, CD34, GAS8, PRKX, SRGAP1, SCG2
GO:0051674	localization of cell	675	29	17.15	67	0.00353	0.01014	0.262676	0.985882	Any process in which a cell is transported to, and/or maintained in, a specific location	0.943347	-0.821125	PKN2, PTPRG, PHLDB2, ADAM9, TGFBR1, CLIC4, SRGAP2C, CDK5R1, DNAAF4, ASH1L, ARHGAP18, OSBPL8, DNER, CDH2, ITGA4, EDN1, KLF4, CDK1, SLC16A1, PTP4A1, DNAAF2, USP33, PDGFC, PARVA, CD2AP, HIF1A, SGK3, ARPC5, COL3A1, AJUBA, ADAM17, NRAS, EPHA4, CD24, C5AR1, FGF2, MYPN, CTNNB1, SOD2, GCNT1, OPHN1, CYP1B1, ROCK1, MYSM1, CCNYL1, ANLN, EFNB2, NET1, SPAG9, PRKCI, MSX2, SNAI2, YES1, PTK2, DNAJA1, KRAS, ITGAV…	HOXB9, HMOX1, LTB4R2, ITGB4, PLEKHG5, CORO1A, CSF1, SLC7A11, TRPM4, WASL, PPIL2, EFNB1, PLTP, TYRO3, PLXNB3, FLNA, LAMA5, ITGB3, CD274, IL17RC, COL1A2, SRC, PLXNA1, GAS6, COL18A1, IL6R, GBF1, ADAM15, GPC1, DGKZ, ENPP2, CD34, GAS8, PRKX, SRGAP1, SCG2
GO:0045787	positive regulation of cell cycle	243	14	6.18	2568	0.00357	0.41042	0.262676	1	Any process that activates or increases the rate or extent of progression through the cell cycle	0.763123	-0.560791	PKN2, CDK5R1, PHIP, HMGN5, ATM, EDN1, CDK1, DDX3X, CUL4B, CCNC, ADAM17, CDKN1B, CNOT8, PKD2, RB1, VPS4B, RAD21, MSX2, ANKRD17, PRKCE, SOX4, GEN1, RACGAP1, ROCK2, CDC7, LSM11, BRCA1, SFPQ, NDC80, RANBP1, TBX3, TRIM32, WNT5A, CCNT2, CNOT6, BECN1	AURKC, ZNF16, E2F8, SRC, MED25, ID2, CARM1, PLK3, SIN3A, FLT3LG
GO:0032892	positive regulation of organic acid tran...	4	2	0.1	22	0.00373	0.00373	0.262676	0.985882	Any process that activates or increases the frequency, rate or extent of the directed movement of organic acids into, out of or within a cell, or between cells, by means of some agent such as a transporter or pore	0.342204	0.342204	EDN1, ARL6IP1
GO:0048617	embryonic foregut morphogenesis	4	2	0.1	23	0.00373	0.00373	0.262676	0.985882	The process in which the anatomical structures of the foregut are generated and organized, during the embryonic phase	0.224519	0.224519	CTNNB1, SMAD3
GO:0071624	positive regulation of granulocyte chemo...	4	2	0.1	4013	0.00373	1	0.262676	1	Any process that increases the rate, frequency or extent of granulocyte chemotaxis. Granulocyte chemotaxis is the movement of a granulocyte in response to an external stimulus	0.437595	0.437595	EDN1, C5AR1
GO:0071680	response to indole-3-methanol	4	2	0.1	4014	0.00373	1	0.262676	1	Any process that results in a change in state or activity of a cell or an organism (in terms of movement, secretion, enzyme production, gene expression, etc.) as a result of an indole-3-methanol stimulus	0.295143	0.295143	CTNNB1, BRCA1, CTNNA1
GO:0071681	cellular response to indole-3-methanol	4	2	0.1	24	0.00373	0.00373	0.262676	0.985882	Any process that results in a change in state or activity of a cell (in terms of movement, secretion, enzyme production, gene expression, etc.) as a result of an indole-3-methanol stimulus	0.295143	0.295143	CTNNB1, BRCA1, CTNNA1
GO:0090023	positive regulation of neutrophil chemot...	4	2	0.1	25	0.00373	0.00373	0.262676	0.985882	Any process that increases the frequency, rate, or extent of neutrophil chemotaxis. Neutrophil chemotaxis is the directed movement of a neutrophil cell, the most numerous polymorphonuclear leukocyte found in the blood, in response to an external stimulus, usually an infection or wounding	0.437595	0.437595	EDN1, C5AR1
GO:0090155	negative regulation of sphingolipid bios...	4	2	0.1	4015	0.00373	1	0.262676	1	Any process that decreases the rate, frequency or extent of sphingolipid biosynthesis. Sphingolipid biosynthesis is the chemical reactions and pathways resulting in the formation of sphingolipids, any of a class of lipids containing the long-chain amine diol sphingosine or a closely related base (a sphingoid)	0.311176	0.311176	PRKAA1
GO:1900060	negative regulation of ceramide biosynth...	4	2	0.1	26	0.00373	0.00373	0.262676	0.985882	Any process that stops, prevents or reduces the frequency, rate or extent of a ceramide biosynthetic process	0.311176	0.311176	PRKAA1
GO:0000280	nuclear division	438	21	11.13	2814	0.00376	0.47894	0.262937	1	The division of a cell nucleus into two nuclei, with DNA and other nuclear contents distributed between the daughter nuclei	0.806634	-0.607393	DSCC1, MZT1, CEP126, KNL1, CCNG1, PHIP, PRKAR1A, ATM, LEMD3, CHAMP1, EDN1, CDK1, BIRC6, NAA50, CD2AP, LRRCC1, CDKN1B, KIF18A, TOP2A, BRIP1, RB1, VPS4B, PPP1R12A, ANLN, CDC27, RAD21, CCNE2, MSX2, ARPP19, BORA, VRK1, ITGB3BP, STAG2, MIS18BP1, GEN1, RACGAP1, CHMP2B, BRCC3, NDC80, CETN3, RANBP1, TOP2B, SKA1, SPDL1, WNT5A, DYNLT3, BECN1	AURKC, CDK11A, WASL, SLX4, FLNA, FSD1, ABRAXAS2, WDR62, INCENP, NEDD1
GO:0035411	catenin import into nucleus	13	3	0.33	27	0.00384	0.00384	0.264189	0.985882	The directed movement of a catenin protein from the cytoplasm into the nucleus	0.338621	0.0738459	WWTR1, CTNNB1, SNAI2, SMAD3
GO:0031047	gene silencing by RNA	100	8	2.54	1193	0.00384	0.15175	0.264189	1	Any process in which RNA molecules inactivate expression of target genes	0.533089	-0.366039	AJUBA, NUP58, CNOT8, AGO2, TSNAX, CELF1, H3F3A, FXR1, SMAD3, NUP160, POLR2K, TNRC6B, CNOT6, NUP155, ERI1	SMAD1
GO:0000003	reproduction	649	28	16.49	3280	0.00391	0.63154	0.264189	1	The production of new individuals that contain some portion of genetic material inherited from one or more parent organisms	0.980679	-1.16973	SMAD5, AGFG1, DDX20, SPIN4, QKI, TGFBR1, CLIC4, PARP11, CLOCK, UBE2J1, KNL1, ASH1L, GJA1, TMED2, SKIL, PRKAR1A, ATM, ACOX1, LGR4, LEMD3, CCNI, CADM1, EDN1, CDK1, TUBD1, FNDC3A, BIRC6, HMGCS1, RBPJ, HIF1A, ACSL4, CDKN1B, KIF18A, DSG2, PKD2, SIRT1, TOP2A, CTNNB1, BRIP1, DDX6, CCNYL1, TSNAX, CELF1, SLC38A2, RAD21, SPAG9, CCNE2, MSX2, TOB2, SPA17, IFT81, H3F3A, PTK2, CLDN11, DNAJA1, TTC26, KRAS, AFF4…	HTRA1, SPP1, IGFBP7, FZD5, AURKC, CSF1, IGFBP2, SLX4, RNF2, TYRO3, E2F8, MGST1, ARID4B, GGNBP1, TRIM36, AC138696.1, SMAD1, SRC, AMH, SPHK2, TESK1, JUNB, TFEB, KMT2B, ADAM15, ZFP41, TESK2, SBF1, SCX, GLI2, ZNF35, STS, WDR33
GO:0022414	reproductive process	649	28	16.49	3281	0.00391	0.63154	0.264189	1	A biological process that directly contributes to the process of producing new individuals by one or two organisms. The new individuals inherit some proportion of their genetic material from the parent or parents	0.980679	-1.16973	SMAD5, AGFG1, DDX20, SPIN4, QKI, TGFBR1, CLIC4, PARP11, CLOCK, UBE2J1, KNL1, ASH1L, GJA1, TMED2, SKIL, PRKAR1A, ATM, ACOX1, LGR4, LEMD3, CCNI, CADM1, EDN1, CDK1, TUBD1, FNDC3A, BIRC6, HMGCS1, RBPJ, HIF1A, ACSL4, CDKN1B, KIF18A, DSG2, PKD2, SIRT1, TOP2A, CTNNB1, BRIP1, DDX6, CCNYL1, TSNAX, CELF1, SLC38A2, RAD21, SPAG9, CCNE2, MSX2, TOB2, SPA17, IFT81, H3F3A, PTK2, CLDN11, DNAJA1, TTC26, KRAS, AFF4…	HTRA1, SPP1, IGFBP7, FZD5, AURKC, CSF1, IGFBP2, SLX4, RNF2, TYRO3, E2F8, MGST1, ARID4B, GGNBP1, TRIM36, AC138696.1, SMAD1, SRC, AMH, SPHK2, TESK1, JUNB, TFEB, KMT2B, ADAM15, ZFP41, TESK2, SBF1, SCX, GLI2, ZNF35, STS, WDR33
GO:0045806	negative regulation of endocytosis	26	4	0.66	2309	0.00391	0.35111	0.264189	1	Any process that stops, prevents, or reduces the frequency, rate or extent of endocytosis	0.33279	-0.287315	ARF6, PICALM	LRSAM1, STX1B
GO:0007044	cell-substrate junction assembly	61	6	1.55	902	0.00436	0.10297	0.290667	1	The aggregation, arrangement and bonding together of a set of components to form a junction between a cell and its substrate	0.538488	-0.490361	PHLDB2, AJUBA, ROCK1, PTK2, PTPRK, ROCK2, SMAD3, LAMC2, ITGA6, LAMA3	ITGB4, LAMA5, ITGB3, SRC, PLEC, TESK2
GO:0045667	regulation of osteoblast differentiation	61	6	1.55	28	0.00436	0.00436	0.290667	0.985882	Any process that modulates the frequency, rate or extent of osteoblast differentiation	0.556642	-0.515956	SMAD5, CTNNB1, MSX2, SNAI2, PTK2, SUCO, TOB1, SMAD3, CYR61, SKI, RUNX2	TRPM4, RIOX1, PTCH1, SMAD1, ID2, IL6R, CEBPD, PIAS2, CTNNBIP1
GO:0044772	mitotic cell cycle phase transition	444	21	11.28	95	0.00439	0.01454	0.290728	0.985882	The cell cycle process by which a cell commits to entering the next mitotic cell cycle phase	0.835798	-0.508821	PRKAR2B, PPP1CB, CUL5, GIGYF2, ATM, BACH1, CDK1, DDX3X, SKP2, TOPBP1, FOXN3, CUL4B, AJUBA, NPAT, ADAM17, CDKN1B, CNOT8, PKD2, RINT1, YWHAG, RB1, VPS4B, CCP110, PPP1R12A, ANLN, CDC27, RAD21, CCNE2, ARPP19, BORA, ANKRD17, FBXW11, CEP70, KHDRBS1, ZFP36L2, SOX4, CDKN2B, SENP2, NBN, GEN1, OFD1, RPA3, CDC7, LSM11, PPP6C, CDC73, NDC80, RANBP1, ZPR1, CNOT6	LZTS1, MRNIP, ID2, FBXL15, CARM1, PLK3, ALMS1, SIN3A, CLSPN, NEDD1, XPC
GO:0045428	regulation of nitric oxide biosynthetic ...	27	4	0.69	29	0.0045	0.0045	0.295425	0.985882	Any process that modulates the frequency, rate or extent of the chemical reactions and pathways resulting in the formation of nitric oxide	0.394401	-0.199142	EDN1, KLF4, PKD2, SMAD3	CD34
GO:0009611	response to wounding	331	17	8.41	1376	0.00452	0.17655	0.295425	1	Any process that results in a change in state or activity of a cell or an organism (in terms of movement, secretion, enzyme production, gene expression, etc.) as a result of a stimulus indicating damage to the organism	0.817366	-0.860175	PRKAR2B, PHLDB2, TGFBR1, GJA1, PRKAR1A, RAB5A, EDN1, KLF4, CDK1, LOX, PDGFC, HIF1A, COL3A1, AJUBA, ADAM17, STXBP3, EPHA4, MTPN, TFPI, FGF2, MSX2, SLC1A3, CAPZA1, H3F3A, DGKH, HPS5, ZFP36L2, PRKCE, PRKG1, SMAD3, CYR61, CDH3, CTNNA1, BPTF, AKAP1, F2R, WNT5A, TENT5A	SPP1, HMOX1, ITGB4, EHD3, SLC7A11, TYRO3, FLNA, ITGB3, COL1A2, SRC, GAS6, ADAM15, DGKZ, CD34
GO:1902589	single-organism organelle organization	1108	42	28.16	2981	0.0047	0.52785	0.303205	1	An organelle organization which involves only one organism	1.10225	-0.747017	MIGA1, GDAP1, PRKAR2B, SLAIN2, AGFG1, CENPQ, WWTR1, PHLDB2, COBLL1, TGFBR1, DSCC1, MAP3K1, ARPC1B, XPO1, MZT1, SRGAP2C, BNIP3L, CDK5R1, DNAAF4, ATF2, CEP126, KNL1, POC1B, ARHGAP18, ARF6, MAP3K2, PRKAR1A, RAB8B, ATM, KIF5B, GMFB, CHAMP1, HOOK3, EDN1, ICK, TBC1D9, CDK1, SSH2, DNA2, PTPDC1, C2CD5, DNAAF2, MYO1B, FIGNL1, PPP1CC, NAA50, CORO2A, RICTOR, PARVA, CD2AP, HIF1A, MARCKS, ARPC5, STX6, GAS2L3,…	FZD5, AURKC, STMN3, CORO1A, EHD3, OMA1, WASL, TBC1D3L, FLNA, ADAMTS16, RABGAP1L, LAMA5, MKLN1, SRC, TMEM175, CLIP3, INF2, ATG2A, KLC1, TMOD1, RTEL1, ATP2C1, AXIN1, GBF1, TSNARE1, ARHGDIA, FBF1, PLK3, PEX16, MCOLN1, ALMS1, FHOD3, INCENP, AC005670.2, TESK2, NEDD1, GAS8, ARAP1, STX1B
GO:0006369	termination of RNA polymerase II transcr...	62	6	1.58	30	0.00473	0.00473	0.303205	0.985882	The process in which the synthesis of an RNA molecule by RNA polymerase II using a DNA template is completed	0.47349	-0.186288	NUDT21, THOC7, SRSF1, MAGOHB, LSM11, PAPOLA, SNRPE	WDR33
GO:0006446	regulation of translational initiation	62	6	1.58	876	0.00473	0.09788	0.303205	1	Any process that modulates the frequency, rate or extent of translational initiation	0.508859	-0.23485	UHMK1, DDX3X, AGO2, EIF4G3, EIF2AK3, KHDRBS1, EIF2S1
GO:0001709	cell fate determination	14	3	0.36	31	0.00479	0.00479	0.305096	0.985882	A process involved in cell fate commitment. Once determination has taken place, a cell becomes committed to differentiate down a particular pathway regardless of its environment	0.303037	0.000864612	KLF4, CTNNB1	PTCH1
GO:0051641	cellular localization	1761	61	44.75	1227	0.00488	0.15963	0.308861	1	A localization process that takes place at the cellular level; as a result of a cellular localization process, a substance or cellular entity, such as a protein complex or organelle, is transported to, and/or maintained in, a specific location within or in the membrane of a cell	1.07881	-1.11789	GDAP1, G3BP2, AGFG1, TMED7, TIMM17A, DDX20, CENPQ, CHML, WWTR1, CCDC14, TGFBR1, FAM126A, NMD3, TRAM1, XPO1, MZT1, STAM, BNIP3L, UHMK1, CDK5R1, UBE2J1, TRNT1, KNL1, ERLEC1, TMED2, ARF6, RAB12, TNKS2, OSBPL8, RAB8B, CDH2, ATM, UGCG, KIF5B, ARMCX3, IBTK, TMEM33, DNAJC6, LEMD3, CHAMP1, RAB5A, ITGA4, HOOK3, KPNA3, CTDSPL2, SRP9, TRPC1, TOR1AIP2, ICK, TBC1D9, CDK1, DDX3X, PSIP1, C2CD5, MORC3, NUS1, PPP…	CRYAB, FZD5, CNIH2, HMOX1, GPR68, CORO1A, EHD3, LAT2, TRPM4, KIF13B, WASL, PPIL2, PLEKHF1, SLC6A9, ABCA7, TBC1D3L, SEC24B, FLNA, SIL1, RABGAP1L, PTCH1, LAMA5, FTH1, PRELID3A, EFR3B, MRNIP, SRC, DLG3, CLIP3, MPPE1, GAS6, KLC1, TSPAN10, RAB31, CARM1, VPS51, GBF1, SLC30A1, IKBKG, TSNARE1, PLK3, TRAPPC9, PEX16, VPS52, MYO6, GNL3L, MCOLN1, LYPLA1, CPT1B, TONSL, SIN3A, AC005670.2, NEDD1, GAS8, AGRN, ST…
GO:0032970	regulation of actin filament-based proce...	200	12	5.08	3303	0.00495	0.64155	0.311321	1	Any process that modulates the frequency, rate or extent of any cellular process that depends upon or alters the actin cytoskeleton	0.808498	-0.537221	PHLDB2, TGFBR1, ARPC1B, CDK5R1, ARHGAP18, ARF6, GMFB, EDN1, SSH2, DSC2, RICTOR, CD2AP, ARPC5, DSG2, MTPN, ROCK1, CAPZA1, ARFIP1, FCHSD2, BAG4, PRKCE, FER, ROCK2, SMAD3, SMAD4, ABI2	CORO1A, TRPM4, WASL, FLNA, TMOD1, ARHGDIA, ALMS1, FHOD3, ARAP1
GO:0070887	cellular response to chemical stimulus	1450	52	36.85	333	0.005	0.04053	0.3125	0.985882	Any process that results in a change in state or activity of a cell (in terms of movement, secretion, enzyme production, gene expression, etc.) as a result of a chemical stimulus	1.15071	-1.22114	UFL1, GDAP1, PRKAR2B, IL1RAP, SMAD5, SERP1, PRKAA1, GDF6, STRN3, UBE2D2, SLC25A24, ADAM9, TGFBR1, PGRMC2, KLHL15, CLIC4, KLF5, CLOCK, BNIP3L, CDK5R1, DNAAF4, RNF149, PHIP, MED13, SKIL, PRKAR1A, OSBPL8, KIF5B, RNF6, RARB, TMEM33, LEMD3, ITGA4, BACH1, CTDSPL2, EEF2K, EDN1, KLF4, CDK1, SLC16A1, NR1D2, DDX3X, C2CD5, SHOC2, HMGCS1, SKP2, RBPJ, PDGFC, DLX1, CPS1, TRIM24, MGARP, PARVA, GNB4, HIF1A, SEC6…	HTRA1, SPP1, IGFBP7, HOXB9, HMOX1, PLEKHG5, GPR68, TNFRSF19, CORO1A, CSF1, TRPM4, IGFBP2, GSTM4, TNFRSF25, ZNF16, PLXNB3, MGST1, ATP1A3, PDE4A, PTCH1, ITGB3, YAP1, IL17RC, SMAD1, GAS2L1, COL1A2, SRC, CLIP3, PELI3, ID2, ZEB1, GAS6, FBXL15, RAB31, CARM1, JUNB, NDOR1, NQO1, IL6R, GBF1, IKBKG, PLK3, GPC1, KDM5D, OXR1, PIAS2, VRK2, TMEM161A, AC022384.1, SIN3A, AC005670.2, MT2A, CD34, AGRN, MED16, RBCK…
GO:0033043	regulation of organelle organization	819	33	20.81	895	0.00507	0.10058	0.312963	1	Any process that modulates the frequency, rate or extent of a process involved in the formation, arrangement of constituent parts, or disassembly of an organelle	0.947168	-0.734077	SLAIN2, ATAD2B, PHLDB2, TGFBR1, CLIC4, ARPC1B, XPO1, STAM, BNIP3L, CDK5R1, NEK7, EID1, ARHGAP18, PHIP, ARF6, TNKS2, PRKAR1A, CDH2, ATM, UGCG, KIF5B, GMFB, TMEM33, RAB5A, CHORDC1, EDN1, TBC1D9, SSH2, C2CD5, RICTOR, MGARP, MIER1, CD2AP, HIF1A, ARPC5, CDKN1B, KIF18A, MTPN, ASF1A, SIRT1, MYPN, CTNNB1, YWHAG, RB1, VPS4B, CCP110, ROCK1, ANLN, CDC27, RAD21, OPA1, RAB3GAP2, MSX2, CAPZA1, SNAI2, RTF1, H3F…	FZD5, STMN3, CORO1A, EHD3, OMA1, PIF1, WASL, SLX4, TBC1D3L, SEC24B, ADAMTS16, RABGAP1L, PRELID3A, LRSAM1, SRC, CLIP3, INF2, TMOD1, RTEL1, KMT2B, ARHGDIA, GNL3L, PNKP, ALMS1, FHOD3, SIN3A, ARAP1
GO:0031334	positive regulation of protein complex a...	151	10	3.84	32	0.00507	0.00507	0.312963	0.985882	Any process that activates or increases the frequency, rate or extent of protein complex assembly	0.77821	-0.452536	SLAIN2, GTF2H2, ARPC1B, ARF6, CAND1, GMFB, CUL4B, RICTOR, ARPC5, AJUBA, FNIP1, CDKN1B, CTNNB1, TAF1, ARFIP1, BAG4, PRKCE, FER, RPA3, GTF2F2, ABI2	CORO1A, WASL, SRC, MED25
GO:0030029	actin filament-based process	392	19	9.96	1860	0.00514	0.25173	0.314024	1	Any cellular process that depends upon or alters the actin cytoskeleton, that part of the cytoskeleton comprising actin filaments and their associated proteins	0.874698	-0.581074	PHLDB2, COBLL1, TGFBR1, MAP3K1, ARPC1B, CDK5R1, ARHGAP18, GJA1, ARF6, MAP3K2, PRKAR1A, GMFB, EDN1, SSH2, MYO1B, DSC2, CORO2A, RICTOR, PARVA, CD2AP, MARCKS, ARPC5, GAS2L3, DSG2, MTPN, MYPN, MYO5A, OPHN1, ROCK1, PRKCI, PLS3, CAPZA1, ARFIP1, KRAS, EPB41L2, FCHSD2, BAG4, PRKCE, PRKG1, FER, RACGAP1, ROCK2, SMAD3, PDCD6IP, SMAD4, EPB41L4A, CTNNA1, ABI2, CNN3, MYOM2, TRIM32, TTC17, NUP155	CORO1A, TRPM4, WASL, FLNA, MKLN1, SRC, INF2, TMOD1, ATP2C1, ARHGDIA, SCN1B, MYO6, ALMS1, FHOD3, TESK2, ARAP1
GO:0071277	cellular response to calcium ion	28	4	0.71	34	0.00515	0.00515	0.314024	0.985882	Any process that results in a change in state or activity of a cell (in terms of movement, secretion, enzyme production, gene expression, etc.) as a result of a calcium ion stimulus	0.57627	-0.222397	SLC25A24, CLIC4, EEF2K, EDN1, PKD2, WNT5A, CPNE3	JUNB
GO:0022613	ribonucleoprotein complex biogenesis	393	19	9.99	118	0.00528	0.01858	0.32	0.985882	A cellular process that results in the biosynthesis of constituent macromolecules, assembly, and arrangement of constituent parts of a complex containing RNA and proteins. Includes the biosynthesis of the constituent RNA and protein molecules, and those macromolecular modifications that are involved in synthesis or assembly of the ribonucleoprotein complex	0.873121	-0.462724	G3BP2, DDX20, PRPF39, NMD3, XPO1, ERI2, NUFIP1, ATM, C1D, DDX3X, PSIP1, RIOK2, SIRT1, PTBP2, HEATR3, UTP23, RPL21, DDX6, AGO2, CELF1, WDR43, DENR, SRSF1, PTGES3, YTHDC1, PAN3, CDC73, SNRPE, RPS3A, RPS25, RBM22, RPF1, NOL11, PA2G4, CNOT6, ABCE1, ERI1	RRP7BP, MTREX, EMG1, SRPK3, TBL3, GNL3L
GO:0051017	actin filament bundle assembly	84	7	2.13	1225	0.00538	0.15861	0.324096	1	The assembly of actin filament bundles; actin filaments are on the same axis but may be oriented with the same or opposite polarities and may be packed with different levels of tightness	0.610621	-0.372385	PHLDB2, TGFBR1, MYO1B, MARCKS, ROCK1, PLS3, BAG4, ROCK2, SMAD3	SRC, ALMS1, ARAP1
GO:0010811	positive regulation of cell-substrate ad...	64	6	1.63	950	0.00553	0.11901	0.325532	1	Any process that increases the frequency, rate or extent of cell-substrate adhesion. Cell-substrate adhesion is the attachment of a cell to the underlying substrate via adhesion molecules	0.529661	-0.380217	EDIL3, UTRN, ROCK1, NET1, PRKCE, SMAD3, CYR61, ITGA6, DOCK5	CSF1, FLNA
GO:0022607	cellular component assembly	1738	60	44.17	1533	0.00572	0.20615	0.325532	1	The aggregation, arrangement and bonding together of a cellular component	1.11887	-1.22772	PRKAR2B, IL1RAP, SLAIN2, G3BP2, PRKAA1, PKN2, AGFG1, DDX20, PRPF39, CENPQ, WWTR1, PHLDB2, COBLL1, TGFBR1, GTF2H2, KLF5, ARPC1B, MZT1, SRGAP2C, STAM, DNAAF4, CEP126, KNL1, NUDT21, NAP1L3, NEK7, POC1B, ARHGAP18, GJA1, TMED2, ARF6, NUFIP1, SASS6, PRKAR1A, DNER, CDH2, ATM, CAND1, GMFB, TMEM33, SACS, RAB5A, KPNA3, EEF2K, EDN1, ICK, CDK1, SSH2, DDX3X, KCTD9, DNA2, PTPDC1, PSIP1, KAT6A, DNAAF2, MYO1B, T…	CRYAB, PANX2, FZD5, CNIH2, HMOX1, AURKC, GRWD1, ITGB4, NECTIN1, CORO1A, EHD3, CRTC1, PILRB, COL6A2, WASL, SLX4, ABCA7, RRP7BP, PLXNB3, MGST1, MYO7B, SEC24B, FLNA, ADAMTS16, LAMA5, ITGB3, IBA57, YAP1, LRRC24, LRSAM1, SMAD1, COL1A2, SRC, TMEM175, CLIP3, MED25, ATG2A, PLEC, GAS6, SRPK3, TMOD1, BRF1, RTEL1, ABRAXAS2, AXIN1, WDR62, FBF1, TRAPPC9, GPC1, AMER1, ALMS1, RABGGTA, FHOD3, AC005670.2, TESK2, …
GO:0072593	reactive oxygen species metabolic proces...	130	9	3.3	938	0.0058	0.11583	0.325532	1	The chemical reactions and pathways involving a reactive oxygen species, any molecules or ions formed by the incomplete one-electron reduction of oxygen. They contribute to the microbicidal activity of phagocytes, regulation of signal transduction and gene expression, and the oxidative damage to biopolymers	0.578702	-0.739672	EDN1, KLF4, CPS1, HIF1A, PKD2, SOD2, CYP1B1, RFK, SMAD3, CYR61, BRCA1, FOXO3, NDUFAF2, BECN1, PRDX3	CRYAB, NOXA1, NQO1, GBF1, CD34, POR
GO:0016458	gene silencing	154	10	3.91	1065	0.00582	0.13298	0.325532	1	Any transcriptional or post-transcriptional process carried out at the cellular level that results in long-term gene inactivation	0.661647	-0.399634	ATAD2B, GIGYF2, MIER1, AJUBA, NUP58, CNOT8, ASF1A, SIRT1, AGO2, TSNAX, CELF1, H3F3A, FXR1, SMAD3, NUP160, POLR2K, TNRC6B, CNOT6, NUP155, ERI1	SMAD1, KMT2B, SIN3A
GO:0051496	positive regulation of stress fiber asse...	29	4	0.74	35	0.00585	0.00585	0.325532	0.985882	Any process that activates or increases the frequency, rate or extent of the assembly of a stress fiber, a bundle of microfilaments and other proteins found in fibroblasts	0.381475	-0.164014	TGFBR1, BAG4, SMAD3
GO:0044267	cellular protein metabolic process	3053	96	77.59	1509	0.00587	0.20138	0.325532	1	The chemical reactions and pathways involving a specific protein, rather than of proteins in general, occurring at the level of an individual cell. Includes cellular protein modification	1.14767	-1.12264	UFL1, PRKAR2B, SMAD5, SERP1, PRKAA1, PKN2, CRIM1, PPP1CB, SH3D19, GDF6, CUL5, PTPRG, CHML, UBE2D2, WWTR1, PDP1, DCUN1D4, SECISBP2L, TIPRL, ADAM9, QKI, TGFBR1, DSCC1, GTF2H2, KLHL15, CLOCK, MAP3K1, ZDHHC20, RNF11, POGLUT1, STAM, BNIP3L, UHMK1, CDK5R1, GIGYF2, DNAAF4, ATF2, UBE2J1, ASH1L, GALNT7, FBXL3, NEK7, RPS6KA3, PIGB, EID1, RNF149, CCNG1, ERLEC1, PHIP, MRPS18C, MAP3K2, RBMS3, ST6GALNAC5, MAP4…	CRYAB, FZD5, AURKC, CDK11A, GRIN2D, DYRK1B, TNFRSF19, B3GNT3, ADAMTSL4, CSF1, ASB16, OMA1, TRPM4, IGFBP2, B3GNT9, PILRB, PPIL2, MAN2A2, RIOX1, EFEMP1, MAP3K10, EOGT, ABCA7, RNF2, MAP3K9, TYRO3, MAN2B1, ARID4B, WFIKKN1, HEMK1, ITGB3, TRIM36, LMTK3, LRSAM1, MRNIP, SMAD1, DTX2, SRC, CLIP3, LYPLAL1, PELI3, MPPE1, RGS3, GAS6, SRPK3, FBXL15, FBXL8, SBK2, CARM1, TESK1, ABRAXAS2, MAN2C1, SPRY4, USP43, KL…
GO:0071822	protein complex subunit organization	1056	40	26.84	1201	0.00591	0.15345	0.325532	1	Any process in which macromolecules aggregate, disaggregate, or are modified, resulting in the formation, disassembly, or alteration of a protein complex	0.97977	-1.1675	IL1RAP, SLAIN2, PRKAA1, COBLL1, TGFBR1, GTF2H2, ARPC1B, MZT1, DNAAF4, NUDT21, ARHGAP18, GJA1, TMED2, ARF6, MRPS18C, NUFIP1, CAND1, GMFB, TMEM33, DNAJC6, KPNA3, CDK1, DDX3X, KCTD9, DNAAF2, TBCA, LOX, PDGFC, CUL4B, RICTOR, CD2AP, MARCKS, ARPC5, P4HA1, COL3A1, AJUBA, NUP58, FNIP1, CDKN1B, KIF18A, PICALM, STXBP3, BET1, IMMP1L, ATL2, MTPN, PIK3C2A, VBP1, CTNNB1, MRPL33, SOD2, VPS4B, TFAM, CYP1B1, TAF1…	CRYAB, PANX2, FZD5, CNIH2, HMOX1, STMN3, CORO1A, EHD3, CRTC1, PILRB, COL6A2, WASL, MGST1, SEC24B, YAP1, SMAD1, COL1A2, SRC, CLIP3, MED25, TMOD1, AXIN1, TRAPPC9, AMER1, COL11A1, RABGGTA, FHOD3, AC005670.2, NDUFS7, CTNNBIP1, STX1B, KCTD11, SCX, ME1
GO:0035195	gene silencing by miRNA	46	5	1.17	36	0.00595	0.00595	0.325532	0.985882	Downregulation of gene expression through the action of microRNAs (miRNAs), endogenous 21-24 nucleotide small RNAs processed from stem-loop RNA precursors (pre-miRNAs). Once incorporated into a RNA-induced silencing complex (RISC), miRNAs can downregulate gene expression by either of two posttranscriptional mechanisms: mRNA cleavage or translational repression	0.442717	-0.312655	AJUBA, CNOT8, AGO2, FXR1, SMAD3, TNRC6B, CNOT6	SMAD1
GO:0007507	heart development	285	15	7.24	2492	0.00602	0.39766	0.325532	1	The process whose specific outcome is the progression of the heart over time, from its formation to the mature structure. The heart is a hollow, muscular organ, which, by contracting rhythmically, keeps up the circulation of the blood	0.773651	-0.529201	TGFBR1, ATF2, GJA1, TMED2, PRKAR1A, ATM, RARB, BICC1, EDN1, CDK1, RBPJ, LOX, C3orf58, PARVA, HIF1A, REST, COL3A1, DSG2, PKD2, FGF2, MYPN, HEG1, CTNNB1, RB1CC1, EFNB2, MSX2, SNAI2, PTK2, SOX4, SENP2, IFT74, SMAD3, CYR61, ADAMTS1, SMAD4, PDLIM5, TBX3, WNT5A, ARMC4, STK3	BORCS8-MEF2B, SEC24B, PTCH1, YAP1, SMAD1, ID2, ADAM15, COL11A1, FHOD3, SCX, GLI2
GO:0065009	regulation of molecular function	1708	59	43.41	1384	0.00611	0.18104	0.325532	1	Any process that modulates the frequency, rate or extent of a molecular function, an elemental biological activity occurring at the molecular level, such as catalysis or binding	1.12573	-0.873168	UFL1, PRKAR2B, IL1RAP, PRKAA1, CRIM1, DENND6A, AGFG1, CHML, WWTR1, DCUN1D4, TIPRL, ADAM9, TGFBR1, DSCC1, ARHGAP12, MAT2B, CLOCK, MAP3K1, SRGAP2C, CDK5R1, ATF2, ELMOD2, TRAPPC13, KNL1, FAM13B, NEK7, RPS6KA3, DENND5B, ARHGAP18, ANP32E, CCNG1, GJA1, TDG, TMED2, MAP3K2, MED13, MAP4K5, PRKAR1A, OSBPL8, KIF5B, CAND1, IBTK, MAP4K3, GMFB, ITGA4, CHORDC1, CREBZF, TOR1AIP2, SH3RF2, EDN1, KLF4, DUSP10, TBC1…	FZD5, CNIH2, HMOX1, LTB4R2, PLEKHG5, NEIL1, GRIN2D, STMN3, CSF1, EHD3, PIF1, CRTC1, CHCHD10, PILRB, WASL, SLX4, WDR81, ZNF16, MAP3K10, RNF2, MAP3K9, PLXNB3, TBC1D3L, FLNA, DEPDC5, RABGAP1L, WFIKKN1, PTCH1, ITGB3, LMTK3, MRNIP, SRC, DLG3, MED25, ID2, NOXA1, RGS3, AMH, RALGDS, GAS6, CARM1, NQO1, PINLYP, AXIN1, GBF1, SLC30A1, IKBKG, ADAM15, ARHGDIA, TRAPPC9, SCN1B, CAMKK1, GNL3L, PNKP, RFNG, LYPLA1,…
GO:0000395	mRNA 5'-splice site recognition	5	2	0.13	37	0.00611	0.00611	0.325532	0.985882	Recognition of the intron 5'-splice site by components of the assembling spliceosome	0.407301	0.407301	PRPF39, PSIP1, SRSF1
GO:0002921	negative regulation of humoral immune re...	5	2	0.13	4016	0.00611	1	0.325532	1	Any process that stops, prevents, or reduces the frequency, rate, or extent of a humoral immune response	0.158176	0.158176	CD55, CD46
GO:0007440	foregut morphogenesis	5	2	0.13	4017	0.00611	1	0.325532	1	The process in which the anatomical structures of the foregut are generated and organized	0.121065	0.121065	CTNNB1, SMAD3
GO:0038092	nodal signaling pathway	5	2	0.13	38	0.00611	0.00611	0.325532	0.985882	A series of molecular signals initiated by the binding of a nodal protein to an activin receptor on the surface of a target cell, and ending with regulation of a downstream cellular process, e.g. transcription	0.163295	0.163295	SMAD3
GO:0045591	positive regulation of regulatory T cell...	5	2	0.13	39	0.00611	0.00611	0.325532	0.985882	Any process that activates or increases the frequency, rate or extent of differentiation of regulatory T cells	0.151002	0.151002	DUSP10, CD46
GO:0045916	negative regulation of complement activa...	5	2	0.13	40	0.00611	0.00611	0.325532	0.985882	Any process that stops, prevents, or reduces the frequency, rate or extent of complement activation	0.158176	0.158176	CD55, CD46
GO:0060789	hair follicle placode formation	5	2	0.13	41	0.00611	0.00611	0.325532	0.985882	The developmental process in which a hair placode forms. An hair follicle placode is a thickening of the ectoderm that will give rise to the hair follicle bud	0.290495	0.290495	CTNNB1
GO:1902624	positive regulation of neutrophil migrat...	5	2	0.13	4018	0.00611	1	0.325532	1	Any process that activates or increases the frequency, rate or extent of neutrophil migration	0.315839	0.315839	EDN1, C5AR1
GO:2000258	negative regulation of protein activatio...	5	2	0.13	4019	0.00611	1	0.325532	1	Any process that stops, prevents or reduces the frequency, rate or extent of protein activation cascade	0.158176	0.158176	CD55, CD46
GO:2000647	negative regulation of stem cell prolife...	5	2	0.13	42	0.00611	0.00611	0.325532	0.985882	Any process that stops, prevents or reduces the frequency, rate or extent of stem cell proliferation	-0.0495531	-0.0495531	SNAI2, CTNNA1	KCTD11
GO:0061572	actin filament bundle organization	86	7	2.19	1342	0.00611	0.17085	0.325532	1	A process that results in the assembly, arrangement of constituent parts, or disassembly of an actin filament bundle	0.610621	-0.372385	PHLDB2, TGFBR1, MYO1B, MARCKS, ROCK1, PLS3, BAG4, ROCK2, SMAD3	SRC, ALMS1, ARAP1
GO:0010810	regulation of cell-substrate adhesion	108	8	2.74	1612	0.00612	0.2079	0.325532	1	Any process that modulates the frequency, rate or extent of cell-substrate adhesion. Cell-substrate adhesion is the attachment of a cell to the underlying substrate via adhesion molecules	0.603104	-0.45439	EDIL3, PHLDB2, UTRN, ROCK1, NET1, PTK2, PRKCE, ROCK2, SMAD3, CYR61, ITGA6, GBP1, DOCK5	CSF1, FLNA, SRC, ADAM15
GO:0006810	transport	2759	88	70.11	2131	0.00621	0.31103	0.328571	1	The directed movement of substances (such as macromolecules, small molecules, ions) into, out of or within a cell, or between cells, or within a multicellular organism by means of some agent such as a transporter or pore	1.19433	-1.36793	ABCB10, SLC4A7, GDAP1, IL1RAP, SERP1, NXT2, G3BP2, PRKAA1, CCDC91, PLEKHF2, AGFG1, KCNK1, ACBD3, TMED7, TIMM17A, CUL5, DDX20, CHML, WWTR1, SLC25A24, ADAM9, QKI, TGFBR1, GTF2H2, CLIC4, PARP11, NMD3, YPEL5, CLOCK, ARPC1B, GOLT1B, SLCO1B3, TRAM1, CACHD1, XPO1, MFSD14A, STAM, BNIP3L, UHMK1, CDK5R1, SLC5A3, ATF2, AGL, UBE2J1, TRNT1, DENND5B, GJA1, ERLEC1, TMED2, ARF6, RAB12, AFTPH, OSBPL8, RAB8B, DNER…	CRYAB, SPP1, PANX2, FZD5, CNIH2, HMOX1, GPR68, SCART1, GRIN2D, TCN2, SLC9A3, NECTIN1, SLC30A3, CORO1A, RAB4B-EGLN2, EHD3, SLC12A6, SLC7A11, AP5B1, LAT2, TRPM4, KIF13B, WASL, SLC22A18, CHIC1, SLC6A9, ABCA7, DPP7, PLTP, TYRO3, MAN2B1, SLC26A10, MGST1, TBC1D3L, SEC24B, ATP1A3, FLNA, SIL1, RABGAP1L, CALHM2, PTCH1, FTH1, ITGB3, CD274, SLC16A13, IL17RC, ATAD3B, PRELID3A, LRSAM1, SRC, DLG3, TMEM175, CLI…
GO:0045785	positive regulation of cell adhesion	181	11	4.6	1618	0.00639	0.20892	0.336316	1	Any process that activates or increases the frequency, rate or extent of cell adhesion	0.743269	-0.587296	DENND6A, EDIL3, ADAM9, ITGA4, DUSP10, RICTOR, CD24, SOCS5, UTRN, ROCK1, EFNB2, NET1, YES1, MAP3K7, ITGAV, CD47, BAG4, PRKCE, IFT74, SMAD3, CYR61, TRAF6, ITGA6, CD55, CD46, WNT5A, DOCK5	CORO1A, CSF1, IGFBP2, EFNB1, FLNA, CD274, SRC, HLX, CD83, GLI2
GO:0016202	regulation of striated muscle tissue dev...	66	6	1.68	43	0.00643	0.00643	0.336649	0.985882	Any process that modulates the frequency, rate or extent of striated muscle development	0.733944	-0.339525	PRKAA1, TGFBR1, GJA1, EDN1, CDK1, NR1D2, RBPJ, MTPN, FGF2, CTNNB1, EFNB2, MKL2, SMAD3, SMAD4	GPC1
GO:0009628	response to abiotic stimulus	705	29	17.92	143	0.00648	0.02345	0.3375	0.985882	Any process that results in a change in state or activity of a cell or an organism (in terms of movement, secretion, enzyme production, gene expression, etc.) as a result of an abiotic (non-living) stimulus	0.936127	-1.05476	PRKAA1, PPP1CB, UBE2D2, GTF2H2, CLOCK, MAP3K1, BNIP3L, ATF2, FBXL3, DENND5B, GJA1, MAP3K2, LRP11, ATM, MAP4K3, BACH1, CHORDC1, EEF2K, EDN1, DDX3X, PSIP1, HMGCS1, ADSS, RBPJ, FIGNL1, PPP1CC, TOPBP1, USP1, CUL4B, MGARP, HIF1A, REST, COL3A1, AJUBA, PCLAF, ADAM17, NUP58, CDKN1B, PKD2, MTPN, CD24, SIRT1, OPN3, BRIP1, TAF1, RWDD3, SLC38A2, GCLC, NET1, SLC1A3, SNAI2, SLC12A2, PTGES3, HIGD1A, REV1, DNAJA…	CRYAB, IGFBP7, HMOX1, GPR68, SLC12A6, IGFBP2, CRTC1, ATP1A3, PTCH1, YAP1, MRNIP, SRC, ID2, COL18A1, JUNB, CLPB, PLK3, PNKP, COL11A1, ANKRD23, TMEM161A, MTA1, CD34, SCX, BRSK1, GLI2, XPC
GO:0044770	cell cycle phase transition	460	21	11.69	123	0.00655	0.02042	0.339378	0.985882	The cell cycle process by which a cell commits to entering the next cell cycle phase	0.835798	-0.52991	PRKAR2B, PPP1CB, CUL5, GIGYF2, ATM, BACH1, CDK1, DDX3X, SKP2, TOPBP1, FOXN3, CUL4B, AJUBA, NPAT, ADAM17, CDKN1B, CNOT8, PKD2, RINT1, YWHAG, RB1, VPS4B, CCP110, TAF1, PPP1R12A, ANLN, CDC27, RAD21, CCNE2, ARPP19, BORA, ANKRD17, FBXW11, CEP70, KHDRBS1, ZFP36L2, SOX4, CDKN2B, SENP2, NBN, GEN1, OFD1, RPA3, CDC7, LSM11, PPP6C, CDC73, NDC80, RANBP1, ZPR1, CNOT6	LZTS1, ZNF16, MRNIP, ID2, FBXL15, CARM1, PLK3, ALMS1, SIN3A, CLSPN, NEDD1, XPC
GO:0090068	positive regulation of cell cycle proces...	182	11	4.63	44	0.00665	0.00665	0.342784	0.985882	Any process that increases the rate, frequency or extent of a cellular process that is involved in the progression of biochemical and morphological phases and events that occur in a cell during successive cell replication or nuclear replication events	0.743234	-0.53943	PKN2, CDK5R1, PHIP, ATM, EDN1, CDK1, DDX3X, CUL4B, CDKN1B, CNOT8, PKD2, RB1, VPS4B, RAD21, MSX2, ANKRD17, PRKCE, SOX4, GEN1, RACGAP1, ROCK2, CDC7, LSM11, BRCA1, SFPQ, NDC80, RANBP1, WNT5A, CNOT6, BECN1	AURKC, ZNF16, E2F8, MED25, ID2, CARM1, PLK3, SIN3A
GO:0043623	cellular protein complex assembly	402	19	10.22	1675	0.00669	0.22635	0.343077	1	The aggregation, arrangement and bonding together of a set of components to form a protein complex, occurring at the level of an individual cell	0.853022	-0.568886	SLAIN2, COBLL1, ARPC1B, MZT1, DNAAF4, ARHGAP18, ARF6, CAND1, GMFB, TMEM33, DNAAF2, TBCA, PDGFC, RICTOR, ARPC5, CDKN1B, PICALM, IMMP1L, MTPN, PIK3C2A, VBP1, TFAM, ANLN, OPA1, CAPZA1, PTK2, ARFIP1, PTGES3, FCHSD2, BAG4, PRKCE, FER, SMAD3, COX11, SMAD4, RALB, NIN, VAMP7, ABI2, NDUFAF2, MYOM2, RANBP9, TTC17, ARMC4, NDUFAF7	CORO1A, PILRB, WASL, SMAD1, SRC, CLIP3, MED25, TMOD1, AXIN1, FHOD3, NDUFS7, STX1B
GO:0051704	multi-organism process	1232	45	31.31	116	0.00673	0.01796	0.343367	0.985882	A biological process which involves another organism of the same or different species	1.03288	-1.18639	SMAD5, PKN2, AGFG1, CUL5, DDX20, SPIN4, ADAM9, QKI, TGFBR1, ERAP1, CLIC4, PARP11, CLOCK, TRAM1, XPO1, BNIP3L, ELMOD2, UBE2J1, KNL1, ASH1L, RPS6KA3, GJA1, TMED2, SKIL, ATM, ACOX1, LGR4, RAB5A, CCNI, KPNA3, CADM1, CREBZF, EDN1, DUSP10, CDK1, TUBD1, POLR3G, DDX3X, PSIP1, MORC3, FNDC3A, CHD1, DEK, RBPJ, CPS1, REST, ADAM17, NUP58, ACSL4, KPNA1, DSG2, CD24, SIRT1, TFPI, TOP2A, C5AR1, RPL21, AP1S2, CTNN…	HTRA1, SPP1, IGFBP7, FZD5, AURKC, NECTIN1, IGFBP2, CRTC1, WASL, ACTA2, TNFRSF25, RNF2, TYRO3, MGST1, ARID4B, ITGB3, GGNBP1, IL17RC, TRIM36, LRSAM1, AC138696.1, SMAD1, SRC, AMH, GAS6, KLC1, CARM1, SPHK2, TESK1, JUNB, IL6R, GBF1, KMT2B, IKBKG, VRK2, ZFP41, MTA1, SIN3A, TESK2, SBF1, RBCK1, PARD6A, ZNF35, STS, GNB1L, WDR33, ISG15
GO:0048634	regulation of muscle organ development	67	6	1.7	4020	0.00691	1	0.34899	1	Any process that modulates the frequency, rate or extent of muscle development	0.733944	-0.339525	PRKAA1, TGFBR1, GJA1, EDN1, CDK1, NR1D2, RBPJ, MTPN, FGF2, CTNNB1, EFNB2, MKL2, SMAD3, SMAD4	GPC1
GO:1901861	regulation of muscle tissue development	67	6	1.7	4021	0.00691	1	0.34899	1	Any process that modulates the frequency, rate or extent of muscle tissue development	0.733944	-0.339525	PRKAA1, TGFBR1, GJA1, EDN1, CDK1, NR1D2, RBPJ, MTPN, FGF2, CTNNB1, EFNB2, MKL2, SMAD3, SMAD4	GPC1
GO:0043153	entrainment of circadian clock by photop...	16	3	0.41	45	0.0071	0.0071	0.351485	0.985882	The synchronization of a circadian rhythm to photoperiod, the intermittent cycle of light (day) and dark (night)	0.311874	-0.272315	PPP1CB, FBXL3, PPP1CC	CRTC1, ID2, MTA1
GO:0043552	positive regulation of phosphatidylinosi...	16	3	0.41	46	0.0071	0.0071	0.351485	0.985882	Any process that activates or increases the frequency, rate or extent of phosphatidylinositol 3-kinase activity	0.310872	-0.118527	FGF2, IRS1, PTK2	SRC
GO:0051894	positive regulation of focal adhesion as...	16	3	0.41	47	0.0071	0.0071	0.351485	0.985882	Any process that activates or increases the frequency, rate or extent of focal adhesion assembly, the establishment and maturation of focal adhesions	0.301433	-0.00303143	ROCK1, SMAD3
GO:0072376	protein activation cascade	16	3	0.41	1778	0.0071	0.2449	0.351485	1	A response to a stimulus that consists of a sequential series of modifications to a set of proteins where the product of one reaction acts catalytically in the following reaction. The magnitude of the response is typically amplified at each successive step in the cascade. Modifications typically include proteolysis or covalent modification, and may also include binding events	0.31127	-0.0307285	TFPI, C5AR1, CD55, CD46
GO:0007411	axon guidance	111	8	2.82	48	0.00719	0.00719	0.352451	0.985882	The chemotaxis process that directs the migration of an axon growth cone to a specific target site in response to a combination of attractive and repulsive cues	0.639338	-0.591759	CDK5R1, KIF5B, USP33, NFIB, PSPN, NRAS, EPHA4, RYK, DPYSL2, OPHN1, EXT1, PTK2, KRAS, NRXN3, SMAD4, SIAH1, RANBP9, WNT5A, KIF5C	SEMA6C, NECTIN1, BOC, EFNB1, ISL2, SRC, PLXNA1, SCN1B, GPC1, GLI2, SEMA4F
GO:0097485	neuron projection guidance	111	8	2.82	4022	0.00719	1	0.352451	1	The process in which the migration of a neuron projection is directed to a specific target site in response to a combination of attractive and repulsive cues	0.639338	-0.591759	CDK5R1, KIF5B, USP33, NFIB, PSPN, NRAS, EPHA4, RYK, DPYSL2, OPHN1, EXT1, PTK2, KRAS, NRXN3, SMAD4, SIAH1, RANBP9, WNT5A, KIF5C	SEMA6C, NECTIN1, BOC, EFNB1, ISL2, SRC, PLXNA1, SCN1B, GPC1, GLI2, SEMA4F
GO:0051168	nuclear export	159	10	4.04	347	0.00725	0.04337	0.353659	0.985882	The directed movement of substances out of the nucleus	0.722151	-0.354886	AGFG1, NMD3, XPO1, UHMK1, CTDSPL2, NUP58, RIOK2, THOC7, SRSF1, PHAX, KHDRBS1, SOX4, MAGOHB, NUP160, RANBP1, STRADB, NUP155, ABCE1	GAS6, WDR33
GO:0030833	regulation of actin filament polymerizat...	89	7	2.26	49	0.00736	0.00736	0.355714	0.985882	Any process that modulates the frequency, rate or extent of the assembly of actin filaments by the addition of actin monomers to a filament	0.656586	-0.434298	ARPC1B, ARHGAP18, ARF6, GMFB, RICTOR, ARPC5, MTPN, CAPZA1, ARFIP1, FCHSD2, BAG4, PRKCE, FER, ABI2	CORO1A, WASL, TMOD1, FHOD3
GO:0051234	establishment of localization	2850	90	72.43	2158	0.00738	0.31831	0.355714	1	The directed movement of a cell, substance or cellular entity, such as a protein complex or organelle, to a specific location	1.19433	-1.36793	ABCB10, SLC4A7, GDAP1, IL1RAP, SERP1, NXT2, G3BP2, PRKAA1, CCDC91, PLEKHF2, AGFG1, KCNK1, ACBD3, TMED7, TIMM17A, CUL5, DDX20, CENPQ, CHML, WWTR1, SLC25A24, PHLDB2, ADAM9, QKI, TGFBR1, GTF2H2, FAM126A, CLIC4, PARP11, NMD3, YPEL5, CLOCK, ARPC1B, GOLT1B, SLCO1B3, TRAM1, CACHD1, XPO1, MFSD14A, STAM, BNIP3L, UHMK1, CDK5R1, SLC5A3, ATF2, AGL, UBE2J1, TRNT1, DENND5B, GJA1, ERLEC1, TMED2, ARF6, RAB12, AF…	CRYAB, SPP1, PANX2, FZD5, CNIH2, HMOX1, GPR68, SCART1, GRIN2D, TCN2, SLC9A3, NECTIN1, SLC30A3, CORO1A, RAB4B-EGLN2, EHD3, SLC12A6, SLC7A11, AP5B1, LAT2, TRPM4, KIF13B, WASL, SLC22A18, CHIC1, SLC6A9, ABCA7, DPP7, PLTP, TYRO3, MAN2B1, SLC26A10, MGST1, TBC1D3L, SEC24B, ATP1A3, FLNA, SIL1, RABGAP1L, CALHM2, PTCH1, LAMA5, FTH1, ITGB3, CD274, SLC16A13, IL17RC, ATAD3B, PRELID3A, LRSAM1, EFR3B, SRC, DLG3…
GO:0043928	exonucleolytic nuclear-transcribed mRNA ...	31	4	0.79	50	0.00746	0.00746	0.355714	0.985882	The chemical reactions and pathways resulting in the breakdown of the transcript body of a nuclear-transcribed mRNA that occurs when the ends are not protected by the 3'-poly(A) tail	0.370977	-0.187515	LSM5, CNOT8, DDX6, CNOT6
GO:0046513	ceramide biosynthetic process	31	4	0.79	2823	0.00746	0.48392	0.355714	1	The chemical reactions and pathways resulting in the formation of ceramides, any N-acylated sphingoid	0.505374	-0.191094	PRKAA1, SGMS1, UGCG, CYR61, SAMD8
GO:0030155	regulation of cell adhesion	320	16	8.13	1673	0.00747	0.22606	0.355714	1	Any process that modulates the frequency, rate or extent of attachment of a cell to another cell or to the extracellular matrix	0.873925	-0.62136	DENND6A, PPP1CB, EDIL3, PHLDB2, ADAM9, PRKAR1A, ITGA4, KLF4, DUSP10, RICTOR, CD24, SOCS5, CTNNB1, UTRN, CYP1B1, ROCK1, ZC3H8, PPP1R12A, EFNB2, NET1, SNAI2, YES1, MAP3K7, PTK2, ITGAV, CD47, BAG4, PRKCE, PRKG1, GLMN, ROCK2, IFT74, SMAD3, CYR61, TRAF6, ITGA6, CD55, GBP1, CD46, LAMA3, WNT5A, DOCK5	CORO1A, CSF1, IGFBP2, EFNB1, PLXNB3, FLNA, LAMA5, CD274, SRC, ZEB1, LAG3, HLX, CD83, ADAM15, ARHGDIA, PRKX, ZBTB7B, GLI2
[truncated: 493 more rows]

## Sheet: top 500 upreg
GO id	Term	Genes in genome (background)	Genes in top-500 upreg	Expected genes in top-500 upreg	Rank in P.Fisher.elim	P.Fisher	P.Fisher.elim	FDR.Fisher	FDR.Fisher.elim	Description	Avg.LogFC for top-10 upreg	Avg.LogFC for top-10 downreg	Upreg genes (LogFC > 0.4)	Downreg genes (LogFC < -0.4)
[truncated: 707 more rows]

[truncated: 6 more sheets: top 1000 upreg, top 40 downreg, top 80 downreg, top 250 downreg, top 500 downreg, top 1000 downreg]
