# Supplementary material for: Effects of Siberian fir terpenes extract Abisil on antioxidant activity, autophagy, transcriptome and proteome of human fibroblasts
Source: Aging (Albany NY). 2021 Aug 24;13(16):20050–80. doi: 10.18632/aging.203448 (PMC8436938; doi:10.18632/aging.203448)
Supplement: Supplementary Table 8 [file aging-13-203448-s009.xlsx]

## Sheet: top 40 upreg
Supplementary Table 8. The results of Gene Ontology (biological processes) enrichment analysis for top 80, 250, 500 and 1000 up- or downregulated genes, the expression of which gradually increases/decreases with the increase of drug concentration (0 µg/ml - 5 µg/ml - 50 µg/ml).
GO id	Term	Genes in genome (background)	Genes in top-40 upreg	Expected genes in top-40 upreg	Rank in P.Fisher.elim	P.Fisher	P.Fisher.elim	FDR.Fisher	FDR.Fisher.elim	Description	Avg.LogFC for top-10 upreg	Avg.LogFC for top-10 downreg	Upreg genes (LogFC > 0.4)	Downreg genes (LogFC < -0.4)
GO:0006614	SRP-dependent cotranslational protein ta...	93	4	0.33	1	0.00032	0.00032	1	1	The targeting of proteins to a membrane that occurs during translation and is dependent upon two key components, the signal-recognition particle (SRP) and the SRP receptor. SRP is a cytosolic particle that transiently binds to the endoplasmic reticulum (ER) signal sequence in a nascent protein, to the large ribosomal unit, and to the SRP receptor in the ER membrane	0.614268	-0.820599	RPSA, RPL31, RPS10, RPS21, RPS19, RPL41, RPL21, RPS29, RPS8, RPL10, RPS12, RPL35A, RPL37A, RPS27A, RPS23, RPL34, RPLP2	SRP19, RPL39, RPL15, RPL36A, SRP72, SRP54, SRP14, RPL17-C18orf32, RPL17, RPL9, SRP9
GO:0006613	cotranslational protein targeting to mem...	98	4	0.35	991	0.00039	1	1	1	The targeting of proteins to a membrane that occurs during translation. The transport of most secretory proteins, particularly those with more than 100 amino acids, into the endoplasmic reticulum lumen occurs in this manner, as does the import of some proteins into mitochondria	0.614268	-0.820599	RPSA, RPL31, RPS10, RPS21, RPS19, RPL41, RPL21, RPS29, RPS8, RPL10, RPS12, RPL35A, RPL37A, RPS27A, RPS23, RPL34, RPLP2	SRP19, RPL39, RPL15, RPL36A, SRP72, SRP54, SRP14, RPL17-C18orf32, RPL17, RPL9, SRP9
GO:0045047	protein targeting to ER	102	4	0.37	992	0.00045	1	1	1	The process of directing proteins towards the endoplasmic reticulum (ER) using signals contained within the protein. One common mechanism uses a 16- to 30-residue signal sequence, typically located at the N-terminus of the protein and containing positively charged amino acids followed by a continuous stretch of hydrophobic residues, which directs the ribosome to the ER membrane and initiates tran…	0.614268	-0.823249	RPSA, RPL31, RPS10, RPS21, RPS19, RPL41, RPL21, RPS29, RPS8, RPL10, RPS12, RPL35A, RPL37A, RPS27A, RPS23, RPL34, RPLP2	SRP19, RPL39, RPL15, RPL36A, SRP72, SRP54, SRP14, SPCS2, RPL17-C18orf32, RPL17, RPL9, SRP9
GO:0072599	establishment of protein localization to...	105	4	0.38	993	0.0005	1	1	1	The directed movement of a protein to a specific location in the endoplasmic reticulum	0.614268	-0.830397	RPSA, RPL31, RPS10, RPS21, RPS19, RPL41, RPL21, RPS29, RPS8, RPL10, RPS12, RPL35A, RPL37A, RPS27A, RPS23, RPL34, RAB3GAP2, RPLP2, RAB3GAP1	SRP19, RPL39, RPL15, RPL36A, SRP72, SRP54, SRP14, RAB10, SPCS2, RPL17-C18orf32, RPL17, RPL9, SRP9
GO:0000184	nuclear-transcribed mRNA catabolic proce...	119	4	0.43	2	0.0008	0.0008	1	1	The nonsense-mediated decay pathway for nuclear-transcribed mRNAs degrades mRNAs in which an amino-acid codon has changed to a nonsense codon; this prevents the translation of such mRNAs into truncated, and potentially harmful, proteins	0.614268	-0.94935	RPSA, RPL31, RPS10, RPS21, RPS19, RPL41, RPL21, RPS29, RPS8, RPL10, RPS12, RPL35A, RPL37A, RPS27A, RPS23, RPL34, RPLP2	RPL39, GSPT1, EIF3E, GSPT2, RPL15, UPF2, PPP2R2A, RPL36A, PNRC2, RPL17-C18orf32, RPL17, RPL9, PABPC1, SMG8
GO:0070972	protein localization to endoplasmic reti...	121	4	0.43	994	0.00086	1	1	1	A process in which a protein is transported to, or maintained in, a location within the endoplasmic reticulum	0.614268	-0.924961	RPSA, RPL31, RPS10, RPS21, RPS19, RPL41, RPL21, RPS29, RPS8, RPL10, RPS12, RPL35A, RPL37A, RPS27A, UBAC2, RPS23, RPL34, RAB3GAP2, HSPA5, RPLP2, KDELR2, RAB3GAP1	SRP19, RPL39, RPL15, KDELR3, RTN4, VAPA, RPL36A, SRP72, SRP54, SRP14, RAB10, SPCS2, RPL17-C18orf32, RPL17, RPL9, SRP9
GO:0000028	ribosomal small subunit assembly	13	2	0.05	3	0.00095	0.00095	1	1	The aggregation, arrangement and bonding together of constituent RNAs and proteins to form the small ribosomal subunit	0.352596	0.0788261	RPSA, RPS10, RPS19, RPS27L	RRP7BP
GO:0042274	ribosomal small subunit biogenesis	59	3	0.21	240	0.00118	0.1408	1	1	A cellular process that results in the biosynthesis of constituent macromolecules, assembly, and arrangement of constituent parts of a small ribosomal subunit; includes transport to the sites of protein synthesis	0.549725	-0.635635	RPSA, RPS10, RPS21, RPS19, RPS8, FCF1, UTP11, RIOK2, RPS27L	MPHOSPH10, UTP3, HEATR1, MRPS9, UTP4, NOL11, LTV1, RRP7BP
GO:0042276	error-prone translesion synthesis	15	2	0.05	4	0.00127	0.00127	1	1	The conversion of DNA-damage induced single-stranded gaps into large molecular weight DNA after replication by using a specialized DNA polymerase or replication complex to insert a defined nucleotide across the lesion. This process does not remove the replication-blocking lesions and causes an increase in the endogenous mutation level. For example, in E. coli, a low fidelity DNA polymerase, pol V…	0.295254	-0.376784	UBC, RPA3, RFC1, RPS27A	POLE2, PCNA, RFC4
GO:0070987	error-free translesion synthesis	17	2	0.06	5	0.00163	0.00163	1	1	The conversion of DNA-damage induced single-stranded gaps into large molecular weight DNA after replication by using a specialized DNA polymerase or replication complex to insert a defined nucleotide across the lesion. This process does not remove the replication-blocking lesions but does not causes an increase in the endogenous mutation level. For S. cerevisiae, RAD30 encodes DNA polymerase eta,…	0.380133	-0.180892	UBC, RPA3, RFC1, RPS27A	PCNA, RFC4
GO:0006612	protein targeting to membrane	153	4	0.55	995	0.00204	1	1	1	The process of directing proteins towards a membrane, usually using signals contained within the protein	0.629271	-0.94865	RPSA, RPL31, RAB8B, RPS10, RPS21, RPS19, RPL41, RPL21, RPS29, RPS8, RPL10, RPS12, RPL35A, RPL37A, MIEF1, RPS27A, RPS23, RPL34, MIEF2, PEX5, ATG4B, RPLP2, PACS2	SRP19, RPL39, RPL15, PEX3, NUP54, PRNP, SDCBP, GOLGA7, MFF, RPL36A, SRP72, SRP54, SRP14, RPL17-C18orf32, RPL17, RPL9, SRP9, ATG4A, MTCL1
GO:0006297	nucleotide-excision repair, DNA gap fill...	19	2	0.07	6	0.00205	0.00205	1	1	Repair of the gap in the DNA helix by DNA polymerase and DNA ligase after the portion of the strand containing the lesion has been removed by pyrimidine-dimer repair enzymes	0.381296	-0.258136	UBC, RPA3, RFC1, RPS27A	PCNA, RFC4
GO:0031145	anaphase-promoting complex-dependent cat...	74	3	0.27	7	0.00227	0.00227	1	1	The chemical reactions and pathways resulting in the breakdown of a protein or peptide by hydrolysis of its peptide bonds, initiated by the covalent attachment of ubiquitin, with ubiquitin-protein ligation catalyzed by the anaphase-promoting complex, and mediated by the proteasome	0.685153	-0.898515	SKP2, PSMA6, ANAPC7, UBC, CDK1, FBXO31, ANAPC11, ANAPC2, RPS27A	PSMD5, PSMD12, PSMA1, ANAPC10, PSMC6, CDC23, PSMA4, PSMD14, PSMD6, UBE2E1, CDC27, PSMD7
GO:0019083	viral transcription	163	4	0.58	8	0.00257	0.00257	1	1	The process by which a viral genome, or part of a viral genome, is transcribed within the host cell	0.636423	-0.935306	RPSA, CDK9, RPL31, RPS10, RPS21, RPS19, RPL41, RPL21, RPS29, RPS8, RPL10, RPS12, RPL35A, TFAP4, RPL37A, TRIM32, RPS27A, JUN, RPS23, RPL34, POM121C, RPLP2, RAE1, CTDP1	RPL39, GTF2B, RPL15, NUP35, TRIM13, NUPL2, NUP54, GTF2F2, NUP37, NUP205, RPL36A, NUP88, ZNF639, RPL17-C18orf32, RPL17, RPL9, HMGA2, POLR2A, TRIM21, NUP43, CCNT1, SP1
GO:0019080	viral gene expression	174	4	0.62	996	0.00326	1	1	1	A process by which a viral gene is converted into a mature gene product or products (proteins or RNA). This includes viral transcription, processing to produce a mature RNA product, and viral translation	0.636423	-0.935306	RPSA, CDK9, RPL31, RPS10, RPS21, RPS19, RPL41, RPL21, RPS29, RPS8, RPL10, RPS12, RPL35A, TFAP4, PTBP1, RPL37A, TRIM32, RPS27A, JUN, RPS23, RPL34, POM121C, EIF2AK4, RPLP2, RAE1, CTDP1	RPL39, GTF2B, RPL15, NUP35, TRIM13, NUPL2, NUP54, GTF2F2, NUP37, NUP205, RPL36A, NUP88, SSB, ZNF639, RPL17-C18orf32, RPL17, RPL9, HMGA2, POLR2A, TRIM21, NUP43, CCNT1, SP1
GO:0006413	translational initiation	177	4	0.63	9	0.00346	0.00346	1	1	The process preceding formation of the peptide bond between the first two amino acids of a protein. This includes the formation of a complex of the ribosome, mRNA, and an initiation complex that contains the first aminoacyl-tRNA	0.635395	-1.10929	RPSA, EIF2B1, RPL31, RPS10, RPS21, RPS19, RPL41, RPL21, DNAJC3, RPS29, RPS8, RPL10, RPS12, RPL35A, EIF1AX, PTBP1, RPL37A, RPS27A, RPS23, RPL34, EIF2AK4, AGO2, EIF2S2, RPLP2, EIF4G3, YTHDF1	RPL39, EIF3M, EIF3E, PAIP1, RPL15, EIF2AK2, NCK1, EIF2A, PPP1R15B, NPM1, EIF1B, EIF3J, EIF3H, MTIF3, RPL36A, ALKBH1, FMR1, YAE1D1, SSB, EIF4B, EIF4E, C8orf88, RPS6KB1, RPL17-C18orf32, EIF4H, RPL17, RPL9, GLE1, MTFMT, ABCE1, EIF5, EIF4A2, PABPC1, DHX29, EIF2B2
GO:0002041	intussusceptive angiogenesis	1	1	0	10	0.00358	0.00358	1	1	The formation of new blood vessels as a result of the insertion and extension of lumenal tissue pillars	0.782856	0.782856	CYR61
GO:0006253	dCTP catabolic process	1	1	0	11	0.00358	0.00358	1	1	The chemical reactions and pathways resulting in the breakdown of dCTP, deoxycytidine triphosphate	0.671166	0.671166	DCTPP1
GO:0009149	pyrimidine nucleoside triphosphate catab...	1	1	0	997	0.00358	1	1	1	The chemical reactions and pathways resulting in the breakdown of pyrimidine nucleoside triphosphate, a compound consisting of a pyrimidine base linked to a ribose or deoxyribose sugar esterified with triphosphate on the sugar	0.671166	0.671166	DCTPP1
GO:0009213	pyrimidine deoxyribonucleoside triphosph...	1	1	0	998	0.00358	1	1	1	The chemical reactions and pathways resulting in the breakdown of pyrimidine deoxyribonucleoside triphosphate, a compound consisting of a pyrimidine base linked to a deoxyribose sugar esterified with triphosphate on the sugar	0.671166	0.671166	DCTPP1
GO:0035105	sterol regulatory element binding protei...	1	1	0	12	0.00358	0.00358	1	1	The transfer of a sterol regulatory element binding protein (SREBP) into the nucleus, across the nuclear membrane, in response to altered levels of one or more lipids. SREBPs are transcription factors that bind sterol regulatory elements (SREs), DNA motifs found in the promoters of target genes	0.522082	0.522082	LMNA
GO:0046065	dCTP metabolic process	1	1	0	999	0.00358	1	1	1	The chemical reactions and pathways involving dCTP, deoxycytidine triphosphate	0.671166	0.671166	DCTPP1
GO:0043604	amide biosynthetic process	580	7	2.08	764	0.00375	0.67641	1	1	The chemical reactions and pathways resulting in the formation of an amide, any derivative of an oxoacid in which an acidic hydroxy group has been replaced by an amino or substituted amino group	0.839603	-1.27627	CERS2, MEX3D, GTF2H3, SECISBP2L, PRKAA1, MTPN, CYR61, RPSA, EIF2B1, RPL31, DEGS1, IGFBP5, TNRC6B, SERP1, RPS10, DDX6, LARP4, RPS21, NAGS, MRPL54, GGT7, RPS19, RPL41, FOXO3, MRPS21, ST3GAL5, RPL21, DAPK3, DNAJC3, UQCC2, RPS29, RPS8, RPL10, RPS12, RPL35A, RPL22L1, EIF1AX, PTBP1, SARS2, RPL37A, RPS27A, MTHFD2, GTF2H2, TIA1, RPS23, RPS27L, RPL34, ORMDL3, EIF2AK4, AGO2, EIF2S2, RPLP2, CHCHD1, TRMT10C,…	RPL39, MRPS30, EIF3M, GSPT1, EIF3E, NFE2L2, PAIP1, AASDH, GSPT2, RPL15, MRPL3, EIF2AK2, MRPL1, NCK1, IARS, FAM129A, EIF2A, PPP1R15B, ARG2, NPM1, GCH1, IREB2, PUM2, EIF1B, EEF1E1, C12orf65, RARS, CAPRIN1, EIF3J, DARS2, EGFR, EIF3H, DDX5, HNRNPR, RMND1, MTIF3, RPL36A, ALKBH1, GARS, MRPS9, WARS2, TNRC6A, FMR1, YAE1D1, SSB, PRKRA, MALSU1, SPTSSA, DND1, RGS2, EIF4B, EIF4E, MRPS27, GGCT, TARS, C8orf88,…
GO:0034655	nucleobase-containing compound catabolic...	297	5	1.06	1000	0.00376	1	1	1	The chemical reactions and pathways resulting in the breakdown of nucleobases, nucleosides, nucleotides and nucleic acids	0.757411	-1.26601	EXOSC6, PNPT1, PDE8A, RPSA, POP1, RPL31, DNA2, TNRC6B, DCTPP1, RPS10, DDX6, RPS21, RPS19, ZHX2, RPL41, LSM5, EDC3, RPL21, RPS29, RPS8, RPL10, SAMHD1, RPS12, RPL35A, THRAP3, RPL37A, PDE7A, DPYD, RPS27A, NUDT18, ITPA, RPS23, RPL34, XDH, AGO2, KPNA1, RPLP2, CASP3, NEIL2, NT5C3A	RPL39, MTREX, GSPT1, RNASEH2B, EIF3E, TENT2, DIS3, PAIP1, GSPT2, RPL15, TATDN1, UPF2, TTC37, EXOSC3, DDX5, LSM1, HNRNPR, PPP2R2A, RPL36A, FMR1, ZC3HAV1, SSB, UNG, PATL1, EIF4B, EIF4E, SETMAR, PNRC2, CNOT2, RPL17-C18orf32, HPRT1, RC3H1, ERN1, NT5E, RPL17, RPL9, CNOT1, SUPV3L1, MBD4, NUDT12, EXOSC9, HBS1L, EIF4A2, PABPC1, DEDD2, OGG1, ZFP36L1, SMPDL3A, HNRNPD, SMG8, EGLN1, APOBEC3C
GO:0006294	nucleotide-excision repair, preincision ...	26	2	0.09	13	0.00383	0.00383	1	1	The aggregation, arrangement and bonding together of proteins on DNA to form the multiprotein complex involved in damage recognition, DNA helix unwinding, and endonucleolytic cleavage at the site of DNA damage. This assembly occurs before the phosphodiester backbone of the damaged strand is cleaved 3' and 5' of the site of DNA damage	0.484254	-0.50394	GTF2H3, UBC, RPA3, RPS27A, GTF2H2	CETN2, MNAT1, GTF2H1, CCNH
GO:0000956	nuclear-transcribed mRNA catabolic proce...	189	4	0.68	1001	0.00438	1	1	1	The chemical reactions and pathways resulting in the breakdown of nuclear-transcribed mRNAs in eukaryotic cells	0.686534	-1.13402	EXOSC6, RPSA, RPL31, TNRC6B, RPS10, DDX6, RPS21, RPS19, RPL41, LSM5, EDC3, RPL21, RPS29, RPS8, RPL10, RPS12, RPL35A, THRAP3, RPL37A, RPS27A, RPS23, RPL34, AGO2, RPLP2	RPL39, GSPT1, EIF3E, TENT2, DIS3, PAIP1, GSPT2, RPL15, UPF2, TTC37, EXOSC3, DDX5, LSM1, PPP2R2A, RPL36A, SSB, PATL1, EIF4B, EIF4E, PNRC2, CNOT2, RPL17-C18orf32, RC3H1, RPL17, RPL9, CNOT1, EXOSC9, HBS1L, EIF4A2, PABPC1, ZFP36L1, SMG8
GO:0044033	multi-organism metabolic process	192	4	0.69	1002	0.00463	1	1	1	A metabolic process - chemical reactions and pathways, including anabolism and catabolism, by which living organisms transform chemical substances - which involves more than one organism	0.639355	-0.977978	RPSA, CDK9, RPL31, RPS10, RPS21, RPS19, RPL41, TOP2A, RPL21, RPS29, RPS8, RPL10, RPS12, RPL35A, TFAP4, MAP2K3, PTBP1, RPL37A, TRIM32, RPS27A, JUN, RPS23, RPL34, POM121C, EIF2AK4, RPLP2, RAE1, MAP2K1, CTDP1	RPL39, MAP2K4, GTF2B, RPL15, NUP35, TRIM13, NUPL2, NUP54, GTF2F2, NUP37, ATG5, NUP205, RPL36A, NUP88, FMR1, SSB, ZNF639, RPL17-C18orf32, RPL17, RPL9, HMGA2, POLR2A, TRIM21, NUP43, CCNT1, SP1
GO:0046700	heterocycle catabolic process	314	5	1.13	1003	0.00477	1	1	1	The chemical reactions and pathways resulting in the breakdown of heterocyclic compounds, those with a cyclic molecular structure and at least two different atoms in the ring (or rings)	0.779953	-1.26601	EXOSC6, PNPT1, FTCD, PDE8A, RPSA, POP1, RPL31, DNA2, TNRC6B, DCTPP1, RPS10, DDX6, RPS21, RPS19, ZHX2, RPL41, LSM5, EDC3, RPL21, RPS29, RPS8, RPL10, SAMHD1, RPS12, RPL35A, THRAP3, RPL37A, PDE7A, DPYD, RPS27A, NUDT18, ITPA, CARNMT1, RPS23, RPL34, XDH, AGO2, KPNA1, RPLP2, CASP3, NEIL2, NT5C3A	RPL39, MTREX, GSPT1, RNASEH2B, EIF3E, TENT2, DIS3, PAIP1, GSPT2, RPL15, TATDN1, HNMT, UPF2, TTC37, EXOSC3, DDX5, LSM1, HNRNPR, PPP2R2A, RPL36A, FMR1, ZC3HAV1, SSB, UNG, PATL1, EIF4B, EIF4E, SETMAR, PNRC2, CNOT2, RPL17-C18orf32, HPRT1, RC3H1, ERN1, NT5E, RPL17, RPL9, CNOT1, SUPV3L1, MBD4, NUDT12, EXOSC9, HBS1L, EIF4A2, PABPC1, DEDD2, OGG1, ZFP36L1, SMPDL3A, HNRNPD, SMG8, EGLN1, APOBEC3C
GO:0044270	cellular nitrogen compound catabolic pro...	315	5	1.13	1004	0.00483	1	1	1	The chemical reactions and pathways resulting in the breakdown of organic and inorganic nitrogenous compounds	0.779953	-1.26601	EXOSC6, PNPT1, FTCD, PDE8A, RPSA, POP1, RPL31, DNA2, TNRC6B, DCTPP1, RPS10, DDX6, RPS21, RPS19, ZHX2, RPL41, LSM5, EDC3, RPL21, RPS29, RPS8, RPL10, SAMHD1, RPS12, RPL35A, THRAP3, TST, RPL37A, PDE7A, DPYD, RPS27A, NUDT18, ITPA, CARNMT1, RPS23, RPL34, XDH, AGO2, KPNA1, RPLP2, CASP3, NEIL2, NT5C3A	RPL39, MTREX, GSPT1, RNASEH2B, EIF3E, TENT2, DIS3, PAIP1, GSPT2, RPL15, TATDN1, HNMT, UPF2, TTC37, EXOSC3, DDX5, LSM1, HNRNPR, PPP2R2A, RPL36A, FMR1, ZC3HAV1, SSB, UNG, PATL1, EIF4B, EIF4E, SETMAR, PNRC2, CNOT2, RPL17-C18orf32, HPRT1, RC3H1, ERN1, NT5E, RPL17, RPL9, CNOT1, SUPV3L1, MBD4, NUDT12, EXOSC9, HBS1L, EIF4A2, PABPC1, DEDD2, OGG1, ZFP36L1, SMPDL3A, HNRNPD, SMG8, EGLN1, APOBEC3C
GO:0019439	aromatic compound catabolic process	322	5	1.15	1005	0.00531	1	1	1	The chemical reactions and pathways resulting in the breakdown of aromatic compounds, any substance containing an aromatic carbon ring	0.779953	-1.26601	EXOSC6, PNPT1, FTCD, PDE8A, RPSA, POP1, RPL31, DNA2, TNRC6B, DCTPP1, RPS10, DDX6, RPS21, RPS19, ZHX2, RPL41, LSM5, EDC3, RPL21, RPS29, RPS8, RPL10, SAMHD1, RPS12, RPL35A, THRAP3, RPL37A, PDE7A, DPYD, RPS27A, NUDT18, ITPA, CARNMT1, RPS23, RPL34, XDH, AGO2, KPNA1, RPLP2, CASP3, NEIL2, NT5C3A	RPL39, MTREX, GSPT1, RNASEH2B, EIF3E, TENT2, DIS3, PAIP1, GSPT2, RPL15, TATDN1, HNMT, UPF2, TTC37, EXOSC3, DDX5, LSM1, HNRNPR, PPP2R2A, RPL36A, FMR1, ZC3HAV1, SSB, UNG, PATL1, EIF4B, EIF4E, SETMAR, PNRC2, CNOT2, RPL17-C18orf32, HPRT1, RC3H1, ERN1, NT5E, RPL17, RPL9, CNOT1, SUPV3L1, MBD4, NUDT12, EXOSC9, HBS1L, EIF4A2, PABPC1, DEDD2, OGG1, ZFP36L1, SMPDL3A, HNRNPD, SMG8, EGLN1, APOBEC3C, PON2
GO:0046513	ceramide biosynthetic process	31	2	0.11	14	0.00542	0.00542	1	1	The chemical reactions and pathways resulting in the formation of ceramides, any N-acylated sphingoid	0.572376	-0.356543	CERS2, PRKAA1, CYR61, DEGS1, ST3GAL5, ORMDL3	SPTSSA, AGK, SAMD8
GO:0006402	mRNA catabolic process	204	4	0.73	1006	0.00574	1	1	1	The chemical reactions and pathways resulting in the breakdown of mRNA, messenger RNA, which is responsible for carrying the coded genetic 'message', transcribed from DNA, to sites of protein assembly at the ribosomes	0.717965	-1.13402	EXOSC6, PNPT1, RPSA, RPL31, TNRC6B, RPS10, DDX6, RPS21, RPS19, ZHX2, RPL41, LSM5, EDC3, RPL21, RPS29, RPS8, RPL10, RPS12, RPL35A, THRAP3, RPL37A, RPS27A, RPS23, RPL34, AGO2, RPLP2	RPL39, GSPT1, EIF3E, TENT2, DIS3, PAIP1, GSPT2, RPL15, UPF2, TTC37, EXOSC3, DDX5, LSM1, HNRNPR, PPP2R2A, RPL36A, FMR1, ZC3HAV1, SSB, PATL1, EIF4B, EIF4E, PNRC2, CNOT2, RPL17-C18orf32, RC3H1, ERN1, RPL17, RPL9, CNOT1, SUPV3L1, EXOSC9, HBS1L, EIF4A2, PABPC1, ZFP36L1, SMG8
GO:0000462	maturation of SSU-rRNA from tricistronic...	32	2	0.11	187	0.00577	0.09916	1	1	Any process involved in the maturation of a precursor Small SubUnit (SSU) ribosomal RNA (rRNA) molecule into a mature SSU-rRNA molecule from the pre-rRNA molecule originally produced as a tricistronic rRNA transcript that contains the Small Subunit (SSU) rRNA, 5.8S rRNA, and the Large Subunit (LSU) in that order from 5' to 3' along the primary transcript	0.452419	-0.454065	RPSA, RPS21, RPS19, RPS8, FCF1	UTP3, HEATR1, MRPS9
GO:1901361	organic cyclic compound catabolic proces...	329	5	1.18	1007	0.00581	1	1	1	The chemical reactions and pathways resulting in the breakdown of organic cyclic compound	0.779953	-1.26601	EXOSC6, PNPT1, FTCD, PDE8A, RPSA, POP1, RPL31, DNA2, TNRC6B, DCTPP1, RPS10, DDX6, RPS21, RPS19, ZHX2, RPL41, LSM5, EDC3, RPL21, RPS29, RPS8, RPL10, SAMHD1, RPS12, RPL35A, THRAP3, RPL37A, PDE7A, DPYD, RPS27A, NUDT18, ITPA, CARNMT1, RPS23, RPL34, SNX17, XDH, AGO2, KPNA1, RPLP2, CASP3, NEIL2, NT5C3A	RPL39, MTREX, GSPT1, RNASEH2B, EIF3E, TENT2, DIS3, PAIP1, GSPT2, RPL15, SPP1, TATDN1, HNMT, UPF2, YWHAH, TTC37, EXOSC3, DDX5, LSM1, HNRNPR, PPP2R2A, RPL36A, FMR1, ZC3HAV1, SSB, HSD17B11, UNG, PATL1, EIF4B, EIF4E, SETMAR, PNRC2, CNOT2, RPL17-C18orf32, HPRT1, RC3H1, ERN1, NT5E, RPL17, RPL9, CNOT1, SUPV3L1, MBD4, NUDT12, EXOSC9, HBS1L, EIF4A2, PABPC1, DEDD2, OGG1, ZFP36L1, SMPDL3A, HNRNPD, SMG8, EGL…
GO:0006296	nucleotide-excision repair, DNA incision...	33	2	0.12	15	0.00612	0.00612	1	1	The endonucleolytic cleavage of the damaged strand of DNA 5' to the site of damage. The incision occurs at the junction of single-stranded DNA and double-stranded DNA that is formed when the DNA duplex is unwound. The incision follows the incision formed 3' to the site of damage	0.515623	-0.402164	GTF2H3, UBC, RPA3, RFC1, RPS27A, GTF2H2	PCNA, RFC4, GTF2H1
GO:0042769	DNA damage response, detection of DNA da...	34	2	0.12	16	0.00649	0.00649	1	1	The series of events required to receive a stimulus indicating DNA damage has occurred and convert it to a molecular signal	0.442146	-0.539014	UBC, RPA3, RFC1, RPS27A	PCNA, RFC4, DNAJA1, MRPS9, DTL, HMGA2
GO:0019058	viral life cycle	340	5	1.22	571	0.00667	0.43444	1	1	A set of processes which all viruses follow to ensure survival; includes attachment and entry of the virus particle, decoding of genome information, translation of viral mRNA by host ribosomes, genome replication, and assembly and release of viral particles containing the genome	0.691636	-1.19147	RPSA, CDK9, UBC, RPL31, CCNK, TRIM5, RPS10, DDX6, RPS21, RPS19, LDLR, RPL41, TOP2A, TAP2, RPL21, RPS29, RPS8, RPL10, RPS12, RPL35A, TFAP4, NOTCH1, TAP1, PTBP1, RPL37A, MAVS, P4HB, TRIM32, SIVA1, RPS27A, CHMP1A, JUN, RPS23, RPL34, CHMP7, POM121C, EIF2AK4, KPNA1, RPLP2, RAE1, TNIP1, CTDP1	ITGB1, RPL39, XPR1, GTF2B, RPL15, EIF2AK2, VPS37A, VTA1, SNX3, NUP35, TRIM13, NUPL2, NUP54, GTF2F2, AC068234.1, WWP1, KPNA3, CHMP2B, OAS3, FAM111A, NUP37, ATG5, DDX5, VAPA, NUP205, RPL36A, RAB1A, NUP88, FMR1, DERL1, ZC3HAV1, SRPK1, SSB, ZNF639, CHMP3, HACD3, RPL17-C18orf32, YTHDC2, RPL17, RPL9, AXL, KPNA4, THOC2, HSPA8, PDCD6IP, HMGA2, POLR2A, PABPC1, SRPK2, RAB7A, TRIM21, PPIA, PPID, APOBEC3C, N…
GO:0019985	translesion synthesis	35	2	0.13	1008	0.00687	1	1	1	The replication of damaged DNA by synthesis across a lesion in the template strand; a specialized DNA polymerase or replication complex inserts a defined nucleotide across from the lesion which allows DNA synthesis to continue beyond the lesion. This process can be mutagenic depending on the damaged nucleotide and the inserted nucleotide	0.440005	-0.670774	UBC, RPA3, RFC1, RPS27A	POLE2, ZBTB1, PCNA, RFC4, DTL, PRIMPOL
GO:0033683	nucleotide-excision repair, DNA incision	35	2	0.13	1009	0.00687	1	1	1	A process that results in the endonucleolytic cleavage of the damaged strand of DNA. The incision occurs at the junction of single-stranded DNA and double-stranded DNA that is formed when the DNA duplex is unwound	0.515623	-0.448909	GTF2H3, UBC, RPA3, RFC1, RPS27A, GTF2H2	PCNA, RFC4, GTF2H1, OGG1
GO:0000461	endonucleolytic cleavage to generate mat...	2	1	0.01	17	0.00716	0.00716	1	1	Endonucleolytic cleavage at the 3'-end of the SSU-rRNA from an originally tricistronic rRNA transcript that contained the Small Subunit (SSU) rRNA, the 5.8S rRNA, and the Large Subunit (LSU) rRNA in that order from 5' to 3' along the primary transcript, to produce the mature end of the SSU-rRNA	0.710268	0.710268	RPSA, RPS21
GO:0003278	apoptotic process involved in heart morp...	2	1	0.01	18	0.00716	0.00716	1	1	Any apoptotic process that contributes to the shaping of the heart	0.215168	0.215168	CYR61
GO:0006407	rRNA export from nucleus	2	1	0.01	19	0.00716	0.00716	1	1	The directed movement of rRNA from the nucleus to the cytoplasm; the rRNA is usually in the form of ribonucleoproteins	0.195538	0.195538	RPSA
GO:0010609	mRNA localization resulting in posttrans...	2	1	0.01	20	0.00716	0.00716	1	1	Any process that modulates the frequency, rate or extent of gene expression after the production of a mRNA transcript by its transport into, or maintainance in, a specific location within the cell	0.412017	0.412017	MEX3D
GO:0033132	negative regulation of glucokinase activ...	2	1	0.01	21	0.00716	0.00716	1	1	Any process that stops, prevents, or reduces the frequency, rate or extent of glucokinase activity, the catalysis of the transfer of a phosphate group, usually from ATP, to a glucose molecule	0.228767	0.228767	MIDN
GO:0071460	cellular response to cell-matrix adhesio...	2	1	0.01	22	0.00716	0.00716	1	1	Any process that results in a change in state or activity of a cell (in terms of movement, secretion, enzyme production, gene expression, etc.) as a result of cell-matrix adhesion	0.60482	0.60482	SKP2
GO:1903300	negative regulation of hexokinase activi...	2	1	0.01	1010	0.00716	1	1	1	Any process that stops, prevents or reduces the frequency, rate or extent of hexokinase activity	0.228767	0.228767	MIDN
GO:0000209	protein polyubiquitination	221	4	0.79	23	0.00759	0.00759	1	1	Addition of multiple ubiquitin groups to a protein, forming a ubiquitin chain	0.887504	-1.09553	UNKL, RNF6, SKP2, PSMA6, ANAPC7, UBC, BRCA1, TRIM5, RNF166, RC3H2, LNPEP, CBL, FBXL19, XIAP, FBXO31, ANAPC11, ANAPC2, UBR2, AMFR, DTX3L, BFAR, TRIM32, SIAH1, RPS27A, RNF114	PSMD5, UBE2D3, PSMD12, PSMA1, ANAPC10, UBE2N, SMURF2, NPEPPS, PSMC6, TRIM36, TOPORS, CDC23, PSMA4, UBE3A, UBE2Q2, FBXL5, CBFB, KLHL20, UBE2A, ANAPC13, HERC6, HACE1, RNF20, DTL, PSMD14, RNF14, UBE2E2, ARIH1, TRIP12, PSMD6, C18orf25, UBE2E1, CDC27, RBBP6, TRIM21, PSMD7, UBE2E3, HLTF, FBXW8
GO:0006401	RNA catabolic process	225	4	0.81	1011	0.00808	1	1	1	The chemical reactions and pathways resulting in the breakdown of RNA, ribonucleic acid, one of the two main type of nucleic acid, consisting of a long, unbranched macromolecule formed from ribonucleotides joined in 3',5'-phosphodiester linkage	0.742402	-1.26601	EXOSC6, PNPT1, RPSA, POP1, RPL31, DNA2, TNRC6B, RPS10, DDX6, RPS21, RPS19, ZHX2, RPL41, LSM5, EDC3, RPL21, RPS29, RPS8, RPL10, RPS12, RPL35A, THRAP3, RPL37A, RPS27A, RPS23, RPL34, AGO2, RPLP2	RPL39, MTREX, GSPT1, RNASEH2B, EIF3E, TENT2, DIS3, PAIP1, GSPT2, RPL15, UPF2, TTC37, EXOSC3, DDX5, LSM1, HNRNPR, PPP2R2A, RPL36A, FMR1, ZC3HAV1, SSB, PATL1, EIF4B, EIF4E, PNRC2, CNOT2, RPL17-C18orf32, RC3H1, ERN1, RPL17, RPL9, CNOT1, SUPV3L1, EXOSC9, HBS1L, EIF4A2, PABPC1, DEDD2, ZFP36L1, HNRNPD, SMG8
GO:0036297	interstrand cross-link repair	39	2	0.14	24	0.00848	0.00848	1	1	Removal of a DNA interstrand crosslink (a covalent attachment of DNA bases on opposite strands of the DNA) and restoration of the DNA. DNA interstrand crosslinks occur when both strands of duplex DNA are covalently tethered together (e.g. by an exogenous or endogenous agent), thus preventing the strand unwinding necessary for essential DNA functions such as transcription and replication	0.479132	-0.403948	UBC, RPA3, DCLRE1B, RPS27A, FAAP24	DCLRE1C, FANCB, FANCL, SLX4
GO:0045778	positive regulation of ossification	39	2	0.14	25	0.00848	0.00848	1	1	Any process that activates or increases the frequency, rate or extent of bone formation	0.535034	-0.395942	TOB2, SMAD5, CYR61, PKDCC, WNT10B, SMAD3, TGFB1	TFAP2A, BMP4, SMAD1, WNT5A
GO:0006364	rRNA processing	231	4	0.83	91	0.00885	0.044	1	1	Any process involved in the conversion of a primary ribosomal RNA (rRNA) transcript into one or more mature rRNA molecules	0.714601	-1.1431	C1D, EXOSC6, RPSA, RPL31, RPS10, NSUN5P1, RPS21, RPS19, RPL41, RPL21, DHX37, RPS29, RPS8, RPL10, RPS12, RPL35A, FCF1, UTP11, RPL37A, NSUN5, RIOK2, RPS27A, NPM3, RRNAD1, RPS23, RPL34, RPLP2	RPL39, MTREX, RPF1, DIS3, MPHOSPH10, UTP3, RPL15, MRPL1, WDR75, DDX21, NOP58, SBDS, RRP15, HEATR1, EXOSC3, TRMT61B, RPL36A, THUMPD1, MRPS9, MAK16, UTP4, RPL17-C18orf32, FRG1, RPL17, RPL9, IMP4, NOL11, UTP15, EXOSC9, LTV1, RRP7BP
GO:0006120	mitochondrial electron transport, NADH t...	42	2	0.15	26	0.00979	0.00979	1	1	The transfer of electrons from NADH to ubiquinone that occurs during oxidative phosphorylation, mediated by the multisubunit enzyme known as complex I	0.462331	-0.389178	NDUFA11, NDUFA2, NDUFB2, NDUFB6, NDUFA9	NDUFS1, NDUFA12, NDUFB1, NDUFA6
GO:0043603	cellular amide metabolic process	697	7	2.5	830	0.01017	0.77551	1	1	The chemical reactions and pathways involving an amide, any derivative of an oxoacid in which an acidic hydroxy group has been replaced by an amino or substituted amino group, as carried out by individual cells	0.882926	-1.27832	CERS2, SLC25A32, MEX3D, GTF2H3, FTCD, SECISBP2L, PRKAA1, MTHFR, MTPN, CYR61, RPSA, EIF2B1, RPL31, DEGS1, IGFBP5, TNRC6B, SLC46A1, SERP1, RPS10, DDX6, LARP4, RPS21, NAGS, MRPL54, LNPEP, GGT7, RPS19, RPL41, SLC19A1, FOXO3, MRPS21, ST3GAL5, RPL21, DAPK3, DNAJC3, UQCC2, RPS29, RPS8, RPL10, RPS12, RPL35A, BTD, HLCS, RPL22L1, EIF1AX, PTBP1, SARS2, RPL37A, PCSK7, RPS27A, MTHFD2, STAT5B, CARNMT1, GTF2H2,…	RPL39, MRPS30, EIF3M, GSPT1, EIF3E, NFE2L2, PAIP1, AASDH, CPE, GSPT2, RPL15, HSP90AA1, MRPL3, EIF2AK2, CPA3, MRPL1, NCK1, IARS, FAM129A, EIF2A, PPP1R15B, ARG2, NPEPPS, NPM1, GCH1, IREB2, PUM2, EIF1B, EEF1E1, C12orf65, RARS, ATP6AP2, CAPRIN1, EIF3J, ALDH5A1, DARS2, EGFR, EIF3H, DDX5, HNRNPR, RMND1, MTIF3, RPL36A, ALKBH1, GARS, MCCC2, MRPS9, WARS2, TNRC6A, LAMP2, FMR1, YAE1D1, SSB, PRKRA, MALSU1, S…
GO:0006301	postreplication repair	44	2	0.16	1012	0.01071	1	1	1	The conversion of DNA-damage induced single-stranded gaps into large molecular weight DNA after replication. Includes pathways that remove replication-blocking lesions in conjunction with DNA replication	0.49113	-0.867675	UBC, RPA3, BRCA1, RFC1, RPS27A	POLE2, ZBTB1, PCNA, UBE2N, MSH2, RFC4, UBE2A, DTL, PRIMPOL, HLTF
GO:0030951	establishment or maintenance of microtub...	3	1	0.01	27	0.01071	0.01071	1	1	Any cellular process that results in the specification, formation or maintenance of polarized microtubule-based cytoskeletal structures	0.123733	0.123733	LMNA
GO:0060591	chondroblast differentiation	3	1	0.01	28	0.01071	0.01071	1	1	The process in which a mesenchymal cell, acquires specialized structural and/or functional features of a chondroblast. Differentiation includes the processes involved in commitment of a cell to a chondroblast fate. A chondroblast is a precursor cell to chondrocytes	0.269323	0.269323	CYR61
GO:0060710	chorio-allantoic fusion	3	1	0.01	29	0.01071	0.01071	1	1	The cell-cell adhesion process in which the cells of the chorion fuse to the cells of the allantois	-0.00864474	-0.00864474	CYR61	ZFP36L1
GO:0030490	maturation of SSU-rRNA	45	2	0.16	235	0.01118	0.13911	1	1	Any process involved in the maturation of a precursor Small SubUnit (SSU) ribosomal RNA (rRNA) molecule into a mature SSU-rRNA molecule	0.478138	-0.604996	RPSA, RPS21, RPS19, RPS8, FCF1, RIOK2	MPHOSPH10, UTP3, HEATR1, MRPS9, UTP4, NOL11
GO:0042255	ribosome assembly	46	2	0.16	1013	0.01166	1	1	1	The aggregation, arrangement and bonding together of the mature ribosome and of its subunits	0.50176	-0.713186	RPSA, RPS10, RPS19, RPL10, NOP53, DDX28, RPS27L	RPF1, BRIX1, EIF2A, NPM1, SBDS, MTERF3, FASTKD2, RRP7BP
GO:0006672	ceramide metabolic process	48	2	0.17	1014	0.01266	1	1	1	The chemical reactions and pathways involving ceramides, any N-acylated sphingoid	0.583062	-0.411171	CERS2, PRKAA1, CYR61, DEGS1, ST3GAL5, ORMDL3	ALDH5A1, SPTSSA, AGK, SAMD8
GO:0016072	rRNA metabolic process	257	4	0.92	106	0.01274	0.05731	1	1	The chemical reactions and pathways involving rRNA, ribosomal RNA, a structural constituent of ribosomes	0.714601	-1.1431	C1D, EXOSC6, RPSA, RPL31, RPS10, NSUN5P1, RPS21, RPS19, RPL41, RPL21, DHX37, RPS29, RPS8, RPL10, RNASEK, RPS12, RPL35A, FCF1, UTP11, RPL37A, NSUN5, RIOK2, RPS27A, NPM3, RRNAD1, RPS23, RPL34, RPLP2, CD3EAP	RPL39, MTREX, RPF1, DIS3, MPHOSPH10, UTP3, RPL15, MRPL1, WDR75, DDX21, NOP58, SBDS, RRP15, HEATR1, NIFK, EXOSC3, TRMT61B, RPL36A, THUMPD1, MRPS9, MAK16, UTP4, RPL17-C18orf32, FRG1, RPL17, RPL9, IMP4, NOL11, UTP15, EXOSC9, DEDD2, LTV1, RRP7BP
GO:0007292	female gamete generation	50	2	0.18	30	0.01368	0.01368	1	1	Generation of the female gamete; specialised haploid cells produced by meiosis and along with a male gamete takes part in sexual reproduction	0.669588	-0.431874	ADAMTS1, H3F3A, TOB2, REC8, FOXO3, ZGLP1, BRCA2	FMN2, ASPM, FOSL1, SRC
GO:0031398	positive regulation of protein ubiquitin...	143	3	0.51	31	0.01418	0.01418	1	1	Any process that activates or increases the frequency, rate or extent of the addition of ubiquitin groups to a protein	0.77382	-1.08799	SKP2, PSMA6, ANAPC7, CDK9, NDFIP2, UBC, BRCA1, XIAP, CDK1, ANAPC11, ANAPC2, CCDC22, BMI1, SPHK1, RASSF5, NDFIP1, RPS27A, GORASP1, HSPA5	PSMD5, ARRDC3, PSMD12, PSMA1, ANAPC10, DCUN1D5, UBE2N, PSMC6, TOPORS, CDC23, PSMA4, UBE3A, RAB1A, DERL1, DCUN1D4, FKBP1A, RNF20, PSMD14, PSMD6, UBE2E1, CDC27, RIPK2, PTTG1IP, PSMD7
GO:0033131	regulation of glucokinase activity	4	1	0.01	1015	0.01426	1	1	1	Any process that modulates the frequency, rate or extent of glucokinase activity, the catalysis of the transfer of a phosphate group, usually from ATP, to a glucose molecule	0.0615959	0.0615959	MIDN	DUSP12
GO:0042262	DNA protection	4	1	0.01	32	0.01426	0.01426	1	1	Any process in which DNA is protected from damage by, for example, oxidative stress	0.0722658	0.0722658	DCTPP1
GO:1903299	regulation of hexokinase activity	4	1	0.01	1016	0.01426	1	1	1	Any process that modulates the frequency, rate or extent of hexokinase activity	0.0615959	0.0615959	MIDN	DUSP12
GO:0044265	cellular macromolecule catabolic process	746	7	2.67	1017	0.01449	1	1	1	The chemical reactions and pathways resulting in the breakdown of a macromolecule, any large molecule including proteins, nucleic acids and carbohydrates, as carried out by individual cells	0.942935	-1.46246	RNF6, SKP2, PSMA6, KIF14, EXOSC6, PNPT1, ANAPC7, RPSA, SOCS4, UBXN2A, UBC, RNF11, POP1, RPL31, DNA2, TNRC6B, RPS10, DDX6, RPS21, RNF166, GSK3B, SUFU, POMT2, RAB12, CBL, RPS19, ZHX2, RPL41, FBXL19, EDEM1, LSM5, CDK1, EDC3, RPL21, DNAJC3, FBXO31, UQCC2, RPS29, ANAPC11, ERLEC1, RPS8, RPL10, ANAPC2, RPS12, RPL35A, USP37, UBR2, AMFR, CCDC22, THRAP3, CHEK2, RPL37A, RDX, BFAR, SOCS6, YME1L1, TRIM32, SIA…	PSMD5, OMA1, PPT1, UBE2D3, RPL39, MTREX, GSPT1, RNASEH2B, UCHL5, PSMD12, USP25, EIF3E, NFE2L2, TENT2, DIS3, PAIP1, HPSE, GSPT2, RPL15, TMTC3, TMF1, USP14, TATDN1, PSMA1, ANAPC10, VPS37A, UBE2N, VPS36, BNIP3L, SMURF2, SUMO1, TAF9, TRIM13, PSMC6, ZMPSTE24, CRBN, TOPORS, CDC23, WWP1, SDCBP, UPF2, PPP2R5C, OPHN1, PSMA4, UBE3A, BBS7, TTC37, EXOSC3, FBXL5, DDX5, KLHL20, LSM1, HNRNPR, UBE2A, NGLY1, PPP2…
GO:0030148	sphingolipid biosynthetic process	53	2	0.19	1018	0.01529	1	1	1	The chemical reactions and pathways resulting in the formation of sphingolipids, any of a class of lipids containing the long-chain amine diol sphingosine or a closely related base (a sphingoid)	0.622231	-0.564092	CERS2, PRKAA1, CYR61, DEGS1, ST3GAL5, SPHK1, CSNK1G2, ORMDL3, ALDH3A2, A4GALT	PRKD3, VAPA, PLPP1, SPTSSA, CERKL, HACD2, AGK, SAMD8
GO:0010257	NADH dehydrogenase complex assembly	54	2	0.19	33	0.01584	0.01584	1	1	The aggregation, arrangement and bonding together of a set of components to form an NADH dehydrogenase complex	0.491962	-0.459899	NDUFA11, NDUFA2, NDUFB2, NDUFB6, NDUFA9, NDUFAF4, TAZ	NDUFS1, NDUFA12, NDUFAF6, NUBPL, NDUFB1, NDUFA6
GO:0032981	mitochondrial respiratory chain complex ...	54	2	0.19	34	0.01584	0.01584	1	1	The aggregation, arrangement and bonding together of a set of components to form mitochondrial respiratory chain complex I	0.491962	-0.459899	NDUFA11, NDUFA2, NDUFB2, NDUFB6, NDUFA9, NDUFAF4, TAZ	NDUFS1, NDUFA12, NDUFAF6, NUBPL, NDUFB1, NDUFA6
GO:0097031	mitochondrial respiratory chain complex ...	54	2	0.19	35	0.01584	0.01584	1	1	The biogenesis of a mitochondrial respiratory chain complex I, a protein complex located in the mitochondrial inner membrane that forms part of the mitochondrial respiratory chain. Includes the synthesis of constituent proteins and their aggregation, arrangement and bonding together	0.491962	-0.459899	NDUFA11, NDUFA2, NDUFB2, NDUFB6, NDUFA9, NDUFAF4, TAZ	NDUFS1, NDUFA12, NDUFAF6, NUBPL, NDUFB1, NDUFA6
GO:0042254	ribosome biogenesis	281	4	1.01	339	0.01719	0.22435	1	1	A cellular process that results in the biosynthesis of constituent macromolecules, assembly, and arrangement of constituent parts of ribosome subunits; includes transport to the sites of protein synthesis	0.723323	-1.17085	C1D, EXOSC6, RPSA, RPL31, RPS10, NSUN5P1, RPS21, ZNF593, RPS19, RPL41, RPL21, DHX37, RPS29, RPS8, RPL10, RPS12, RPL35A, FCF1, UTP11, RPL37A, NOP53, NSUN5, RIOK2, RPS27A, DDX28, NPM3, RRNAD1, RPS23, URB2, RPS27L, RPL34, RPLP2	RPL39, MTREX, RPF1, BRIX1, DIS3, MPHOSPH10, UTP3, RPL15, MRPL1, WDR75, DDX21, EIF2A, NPM1, NOP58, SBDS, RRP15, HEATR1, EXOSC3, MTERF3, TRMT61B, RPL36A, THUMPD1, MRPS9, NUP88, YAE1D1, SDAD1, MALSU1, MAK16, UTP4, RPL17-C18orf32, FRG1, RPL17, RPL9, IMP4, NOL11, ZNHIT6, UTP15, RIOX2, ABCE1, EXOSC9, FASTKD2, LTV1, GNL3L, RRP7BP
GO:0055114	oxidation-reduction process	596	6	2.14	205	0.01747	0.1128	1	1	A metabolic process that results in the removal or addition of one or more electrons to or from a substance, with or without the concomitant removal or addition of a proton or protons	1.0145	-1.0921	TMX1, EGLN2, PPP1R3D, SOD2, PNPT1, D2HGDH, UQCRHL, PRKAA1, MTHFR, NDUFA11, UBC, DEGS1, NDUFA2, CYB5B, NDUFB2, MECP2, PECR, PFKFB4, PYGB, CYB561D1, GSK3B, NUDT19, CDK1, LBR, ACAD8, KDM1B, NDUFB6, RDH5, NDUFA9, HIF1A, UQCRQ, CPOX, SCCPDH, HIGD2A, STK40, STBD1, COX10, DOHH, ALKBH7, DPYD, HMGCR, P4HB, RPS27A, PYROXD2, MTHFD2, GFOD1, AKR1C3, ABCD1, IRS1, HSD17B1, AAED1, IMPDH1, XDH, CYB561D2, ALDH3A2,…	UGP2, HIGD1A, GPD2, ABCC4, NBPF9, UQCRB, KDM5A, TXNL1, ERO1A, SQLE, FASTKD3, ALKBH8, NDUFS1, ABCD3, OXR1, CALM2, ALDH5A1, AP003108.2, ACADSB, JMJD1C, CYP20A1, SCP2, KDM5D, NBPF20, ALKBH1, ACADM, PMPCB, PLOD2, IDH3A, GFPT1, NDUFA12, ALDH9A1, KDM3A, HSD17B11, ME2, GYG1, MICAL2, PPP1R3E, ADIPOR1, GDI2, PDHB, MGST1, CRYZL1, NOA1, RRM2B, AUH, RDH11, PEX2, TMX3, ETFDH, NBPF1, MTO1, CYP27C1, ASPH, GAPDH…
GO:0001542	ovulation from ovarian follicle	5	1	0.02	36	0.0178	0.0178	1	1	The process leading to the rupture of the follicle, releasing the centrally located oocyte into the oviduct. An example of this is found in Mus musculus	0.336921	0.336921	ADAMTS1, FOXO3
GO:0009211	pyrimidine deoxyribonucleoside triphosph...	5	1	0.02	1019	0.0178	1	1	1	The chemical reactions and pathways involving pyrimidine deoxyribonucleoside triphosphate, a compound consisting of a pyrimidine base linked to a deoxyribose sugar esterified with triphosphate on the sugar	0.00818775	0.00818775	DCTPP1	TBPL1
GO:0033690	positive regulation of osteoblast prolif...	5	1	0.02	37	0.0178	0.0178	1	1	Any process that activates or increases the rate or extent of osteoblast proliferation	0.0205825	0.0205825	CYR61	HPSE
GO:0051029	rRNA transport	5	1	0.02	1020	0.0178	1	1	1	The directed movement of rRNA, ribosomal ribonucleic acid, into, out of or within a cell, or between cells, by means of some agent such as a transporter or pore	0.330451	0.330451	PNPT1, RPSA, TST
GO:1903322	positive regulation of protein modificat...	157	3	0.56	38	0.01818	0.01818	1	1	Any process that activates or increases the frequency, rate or extent of protein modification by small protein conjugation or removal	0.77382	-1.08799	SKP2, PSMA6, ANAPC7, CDK9, NDFIP2, UBC, BRCA1, XIAP, CDK1, ANAPC11, ANAPC2, CCDC22, BMI1, SPHK1, RASSF5, NDFIP1, RPS27A, GORASP1, HSPA5	PSMD5, ARRDC3, PSMD12, PSMA1, ANAPC10, DCUN1D5, UBE2N, PSMC6, TOPORS, CDC23, PSMA4, UBE3A, RAB1A, DERL1, DCUN1D4, FKBP1A, RNF20, PSMD14, PSMD6, UBE2E1, CDC27, RIPK2, PTTG1IP, PSMD7
GO:0042127	regulation of cell proliferation	781	7	2.8	39	0.0183	0.0183	1	1	Any process that modulates the frequency, rate or extent of cell proliferation	1.09055	-1.33822	ADAMTS1, FOSL2, SKP2, FGFR3, CERS2, KIF14, TAX1BP3, SOD2, TOB2, TIAM1, BIRC6, PRKAA1, CYR61, AHR, RPA3, CCAR1, BRCA1, TBX2, IGFBP5, EGR1, SMAD4, KRAS, ATOH8, PLXNB1, MECP2, MDM4, CDCA7L, COPS9, KISS1, CDH2, JARID2, PBRM1, RNF10, TGFBR1, GATA2, FOXO3, XIAP, FOXM1, CDK1, HILPDA, ATAD5, CASK, SLC35F6, FLCN, ZNF703, MAGED1, S1PR2, ROMO1, FAM129B, PTPRJ, LMNA, TFAP4, IFT122, NOTCH1, S100A13, HIF1A, TS…	ITGB1, MTBP, RNASEH2B, NRK, NOV, PDCD10, CREB1, MARCH7, HPSE, ABCC4, GPAM, GNG5, SYF2, LYN, STAT1, EIF2AK2, AKIRIN2, NAP1L1, KRIT1, RTN4, IFT74, NCK1, NPM1, NAMPT, EEF1E1, PRNP, PDGFRA, TOPORS, AC068234.1, SDCBP, CIP2A, STRAP, PPP2R5C, C18orf54, MNAT1, EGFR, NKX3-1, IQGAP3, SH3BP4, UBE2A, TFAP2A, LGALS3, AGTR1, PLPP1, GREM1, RBBP9, CTF1, TTK, ISL1, HIST1H2AC, BCHE, KIFAP3, PLAC8, AREG, JAK1, ADAM…
GO:0003206	cardiac chamber morphogenesis	60	2	0.22	40	0.01934	0.01934	1	1	The process in which a cardiac chamber is generated and organized. A cardiac chamber is an enclosed cavity within the heart	0.657182	-0.768272	ADAMTS1, CYR61, TBX2, SMAD4, TGFBR1, NOTCH1, HIF1A, TBX3, TGFB1	DVL3, COL11A1, CPE, ISL1, FKBP1A, NOTCH2, MED1, ID2, BMP4, SEMA3C, WNT5A, EGLN1, RARB, RBPJ, PKP2
GO:0000731	DNA synthesis involved in DNA repair	61	2	0.22	1021	0.01995	1	1	1	Synthesis of DNA that proceeds from the broken 3' single-strand DNA end uses the homologous intact duplex as the template	0.577547	-0.75364	UBC, RPA3, BRCA1, RMI1, DNA2, RFC1, RPS27A, BRCA2	POLE2, ZBTB1, PCNA, RFC4, RBBP8, DTL, PRIMPOL, EXO1
GO:0009204	deoxyribonucleoside triphosphate catabol...	6	1	0.02	1022	0.02132	1	1	1	The chemical reactions and pathways resulting in the breakdown of a deoxyribonucleoside triphosphate, a compound consisting of a nucleobase linked to a deoxyribose sugar esterified with triphosphate on the sugar	0.166692	0.166692	DCTPP1, SAMHD1
GO:0010992	ubiquitin homeostasis	6	1	0.02	41	0.02132	0.02132	1	1	Any process involved in the maintenance of an internal steady state of ubiquitin monomers and free ubiquitin chains at the level of the cell	0.0706766	0.0706766	UBC
GO:0030952	establishment or maintenance of cytoskel...	6	1	0.02	42	0.02132	0.02132	1	1	Any cellular process that results in the specification, formation or maintenance of polarized cytoskeletal structures	0.303431	0.303431	ARHGAP35, LMNA, RICTOR
GO:0032933	SREBP signaling pathway	6	1	0.02	1023	0.02132	1	1	1	A series of molecular signals from the endoplasmic reticulum to the nucleus generated as a consequence of decreased levels of one or more sterols (and in some yeast, changes in oxygen levels) and which proceeds through activation of a sterol response element binding transcription factor (SREBP) to result in up-regulation of target gene transcription	-0.094687	-0.094687	LMNA	EIF2A
GO:0071501	cellular response to sterol depletion	6	1	0.02	1024	0.02132	1	1	1	Any process that results in a change in state or activity of a cell (in terms of movement, secretion, enzyme production, gene expression, etc.) as a result of a stimulus indicating deprivation of sterols. Sterols are a group of steroids characterized by the presence of one or more hydroxyl groups and a hydrocarbon side-chain in the molecule	-0.094687	-0.094687	LMNA	EIF2A
GO:1902916	positive regulation of protein polyubiqu...	6	1	0.02	43	0.02132	0.02132	1	1	Any process that activates or increases the frequency, rate or extent of protein polyubiquitination	0.14054	0.14054	SKP2, XIAP
GO:0090150	establishment of protein localization to...	302	4	1.08	1025	0.0218	1	1	1	The directed movement of a protein to a specific location in a membrane	0.772175	-1.29316	FAM126A, RPSA, RPL31, RAB26, RAB8B, RPS10, RPS21, CDH2, EFR3A, RPS19, RPL41, RPL21, RPS29, RPS8, RPL10, RPS12, RPL35A, TOMM7, PPP2R5A, SCRIB, ARHGAP44, ARF6, RPL37A, RER1, PPP3R1, MIEF1, RDX, PKDCC, MPP5, CNST, RPS27A, EZR, RPS23, RPL34, MIEF2, KIF13A, PEX5, YWHAG, RAB3GAP2, ATG4B, RPLP2, PACS2, TSPAN14, RAB3GAP1	ITGB1, SRP19, RPL39, LYPLA1, PIK3R1, RHOQ, RPL15, YWHAZ, HSP90AA1, TMEM59, PEX3, NUP54, RAB11A, PRNP, SDCBP, CALM2, YWHAH, BLZF1, EGFR, VAMP3, GOLGA7, MFF, RPL36A, SRP72, MAPK8, SRP54, SRP14, HSPA4, RAB10, RPL17-C18orf32, RPL17, RPL9, SRP9, ATG4A, MTCL1, RAB8A, RAB31, PKP2
GO:0006283	transcription-coupled nucleotide-excisio...	66	2	0.24	44	0.02313	0.02313	1	1	The nucleotide-excision repair process that carries out preferential repair of DNA lesions on the actively transcribed strand of the DNA duplex. In addition, the transcription-coupled nucleotide-excision repair pathway is required for the recognition and repair of a small subset of lesions that are not recognized by the global genome nucleotide excision repair pathway	0.53701	-0.706546	GTF2H3, UBC, RPA3, AQR, RFC1, RPS27A, GTF2H2	PCNA, COPS2, MNAT1, RFC4, GTF2H1, CCNH, TCEA1, COPS8, POLR2A
GO:0051436	negative regulation of ubiquitin-protein...	68	2	0.24	45	0.02445	0.02445	1	1	Any process that stops, prevents, or reduces the frequency, rate or extent of ubiquitin ligase activity that contributes to the mitotic cell cycle	0.588062	-0.898515	PSMA6, ANAPC7, UBC, CDK1, ANAPC11, ANAPC2, RPS27A	PSMD5, PSMD12, PSMA1, ANAPC10, PSMC6, CDC23, PSMA4, PSMD14, PSMD6, UBE2E1, CDC27, PSMD7
GO:0006991	response to sterol depletion	7	1	0.03	1026	0.02483	1	1	1	Any process that results in a change in state or activity of a cell or an organism (in terms of movement, secretion, enzyme production, gene expression, etc.) as a result of a stimulus indicating deprivation of sterols. Sterols are a group of steroids characterized by the presence of one or more hydroxyl groups and a hydrocarbon side-chain in the molecule	-0.229035	-0.229035	LMNA	LYN, EIF2A
GO:0060347	heart trabecula formation	7	1	0.03	46	0.02483	0.02483	1	1	The process of creating a trabecula in the heart. A trabecula is a tissue element in the form of a small beam, strut or rod	0.129728	0.129728	ADAMTS1	FKBP1A, EGLN1
GO:0060713	labyrinthine layer morphogenesis	7	1	0.03	47	0.02483	0.02483	1	1	The process in which the labyrinthine layer of the placenta is generated and organized	-0.00072395	-0.00072395	CYR61	ZFP36L1, NCOA1
GO:0072201	negative regulation of mesenchymal cell ...	7	1	0.03	48	0.02483	0.02483	1	1	Any process that decreases the frequency, rate or extent of mesenchymal cell proliferation. A mesenchymal cell is a cell that normally gives rise to other cells that are organized as three-dimensional masses, rather than sheets	0.0725197	0.0725197	LMNA, NFIB	BMP4, WNT5A
GO:0090154	positive regulation of sphingolipid bios...	7	1	0.03	49	0.02483	0.02483	1	1	Any process that increases the rate, frequency or extent of sphingolipid biosynthesis. Sphingolipid biosynthesis is the chemical reactions and pathways resulting in the formation of sphingolipids, any of a class of lipids containing the long-chain amine diol sphingosine or a closely related base (a sphingoid)	0.144131	0.144131	CYR61
GO:2000009	negative regulation of protein localizat...	7	1	0.03	50	0.02483	0.02483	1	1	Any process that stops, prevents, or reduces the frequency, rate or extent of protein localization to the cell surface	0.120412	0.120412	TAX1BP3, LEPROT	LEPROTL1
GO:2000304	positive regulation of ceramide biosynth...	7	1	0.03	51	0.02483	0.02483	1	1	Any process that activates or increases the frequency, rate or extent of ceramide biosynthetic process	0.144131	0.144131	CYR61
GO:1901564	organonitrogen compound metabolic proces...	1445	10	5.18	924	0.025	0.96588	1	1	The chemical reactions and pathways involving organonitrogen compound	1.06725	-1.51948	SPNS2, CERS2, PSMA6, GPC2, EGLN2, SLC25A32, MEX3D, GTF2H3, ADSS, FTCD, MBOAT2, THTPA, SECISBP2L, UQCRHL, PRKAA1, MTHFR, MTPN, CYR61, ARSI, PDE8A, RPSA, NDUFA11, PSPH, FIGNL1, CSGALNACT2, MC1R, PXYLP1, EIF2B1, MRAP, ST3GAL2, RPL31, DEGS1, RFK, SLC22A5, IGFBP5, TNRC6B, NDUFA2, DCTPP1, BPNT1, SLC46A1, SERP1, UMPS, RPS10, DDX6, NDUFB2, LARP4, RPS21, MECP2, NAGS, OSBPL8, MRPL54, PFKFB4, PDXK, LNPEP, G…	PSMD5, EXTL2, PPCS, PPT1, ATP5F1EP2, RPL39, MRPS30, EIF3M, GSPT1, MMADHC, LINC02210-CRHR1, PSMD12, EIF3E, NFE2L2, AZIN1, PAIP1, HPSE, AASDH, RHOQ, PRKD3, CPE, ADNP, GSPT2, RPL15, SLC22A4, UQCRB, HSP90AA1, MRPL3, EIF2AK2, DNM1L, HMMR, PSMA1, CPA3, MRPL1, LUM, CSNK2A2, MSH2, ERO1A, NCK1, IARS, FAM129A, EIF2A, PPP1R15B, ARG2, NPEPPS, NPM1, GCH1, IREB2, PUM2, PSMC6, EIF1B, NAMPT, EEF1E1, C12orf65, ND…
GO:0051439	regulation of ubiquitin-protein ligase a...	69	2	0.25	52	0.02513	0.02513	1	1	A cell cycle process that modulates the frequency, rate or extent of ubiquitin ligase activity that contributes to the mitotic cell cycle	0.588062	-0.898515	PSMA6, ANAPC7, UBC, CDK1, ANAPC11, ANAPC2, RPS27A	PSMD5, PSMD12, PSMA1, ANAPC10, PSMC6, CDC23, PSMA4, PSMD14, PSMD6, UBE2E1, CDC27, PSMD7
GO:0030522	intracellular receptor signaling pathway	179	3	0.64	53	0.02562	0.02562	1	1	Any series of molecular signals initiated by a ligand binding to an receptor located within a cell	0.856632	-0.900828	RNF6, SKP2, EGLN2, RXRB, CHUK, AHR, NCOA3, UBC, BRCA1, THRA, NR1D2, XIAP, THRAP3, VDR, MAVS, RPS27A, CYLD, AKR1C3, IRAK2, ERBIN, IKBKG, TRIM68	THRB, UBE2N, NCOA4, MED4, PUM2, NR2C1, PIAS2, TAB2, YWHAH, UBE3A, UBA5, NKX3-1, DDX5, KDM5D, PLPP1, DNAJA1, NR2F1, ISL1, KDM3A, MED12, NOTCH2, DDX17, RNF14, MED1, MED17, CNOT2, CNOT1, PUM1, PDK3, RIPK2, NCOA1, RARB, SRC
GO:0051437	positive regulation of ubiquitin-protein...	72	2	0.26	54	0.0272	0.0272	1	1	Any process that activates, maintains or increases the rate of ubiquitin ligase activity that contributes to the mitotic cell cycle	0.588062	-0.898515	PSMA6, ANAPC7, UBC, CDK1, ANAPC11, ANAPC2, RPS27A	PSMD5, PSMD12, PSMA1, ANAPC10, PSMC6, CDC23, PSMA4, PSMD14, PSMD6, UBE2E1, CDC27, PSMD7
GO:0006605	protein targeting	486	5	1.74	1027	0.02776	1	1	1	The process of targeting specific proteins to particular membrane-bounded subcellular organelles. Usually requires an organelle specific protein sequence motif	0.726523	-1.22963	IPO4, RPSA, DNAJC19, RPL31, SMAD4, RAB8B, RPS10, KPNA6, TNPO2, RPS21, TOMM5, GSK3B, SUFU, TOMM40L, THRA, RPS19, RPL41, TGFBR1, UBL5, CDK1, DNLZ, RPL21, NLRP3, NFKBIE, RPS29, RPS8, RPL10, LEPROT, RPS12, RPL35A, IPO7, TOMM7, LMNA, CCDC22, VTI1A, RPL37A, SPHK1, TSPO, PPP3R1, MIEF1, MAVS, NAGPA, RPS27A, CYLD, IPO11, AKR1C3, JUN, RPS23, RPL34, ERBIN, MIEF2, POM121C, PEX5, YWHAG, ATG4B, KPNA1, RPLP2, P…	UBE2D3, SRP19, RPL39, TNPO1, NOV, PIK3R1, RPL15, YWHAZ, HSP90AA1, CSNK2A2, VPS36, BNIP3L, WDR75, TOMM20, PEX3, NCOA4, NPEPPS, NUP35, AP3B1, AP3M1, NUP54, PRNP, HNMT, SDCBP, KPNA3, ZFAND6, EGFR, GOLGA7, MFF, SH3GLB1, RPL36A, SRP72, GREM1, RAB6A, NUP88, LAMP2, SRP54, SRP14, SYNJ2BP, HSPA4, ZFYVE16, PEX1, MED1, SPCS2, RPL17-C18orf32, RANBP6, RPL17, CEP57, RPL9, PEX2, BMP4, KPNA4, SRP9, ATG4A, NF1, H…
GO:1904667	negative regulation of ubiquitin protein...	73	2	0.26	55	0.0279	0.0279	1	1		0.588062	-0.898515	PSMA6, ANAPC7, UBC, CDK1, ANAPC11, ANAPC2, RPS27A	PSMD5, PSMD12, PSMA1, ANAPC10, PSMC6, CDC23, PSMA4, PSMD14, PSMD6, UBE2E1, CDC27, PSMD7
GO:0072594	establishment of protein localization to...	487	5	1.75	1028	0.02798	1	1	1	The directed movement of a protein to a specific location on or in an organelle. Encompasses establishment of localization in the membrane or lumen of a membrane-bounded organelle	0.734117	-1.22963	IPO4, RPSA, NRAS, DNAJC19, RPL31, SMAD4, RAB8B, RPS10, KPNA6, TNPO2, RPS21, TOMM5, GSK3B, SUFU, TOMM40L, THRA, AP3D1, RPS19, RPL41, TGFBR1, UBL5, CDK1, WRAP53, DNLZ, RPL21, NLRP3, NFKBIE, RPS29, RPS8, RPL10, LEPROT, RPS12, RPL35A, IPO7, TOMM7, LMNA, IFT122, SCRIB, CCDC22, VTI1A, RPL37A, SPHK1, TSPO, PPP3R1, TSPAN17, MAVS, NAGPA, RPS27A, MAPT, CYLD, IPO11, AKR1C3, JUN, RPS23, RPL34, BRCA2, POM121C…	UBE2D3, SRP19, RPL39, TNPO1, NOV, PIK3R1, RPL15, YWHAZ, HSP90AA1, CSNK2A2, VPS36, BNIP3L, WDR75, TOMM20, PEX3, NCOA4, NPEPPS, NUP35, AP3B1, AP3M1, NUP54, RAB11A, HNMT, HSPH1, CALM2, KPNA3, YWHAH, ZFAND6, EGFR, TCP1, MFF, SH3GLB1, RPL36A, SRP72, MAPK8, DNAJA1, GREM1, RAB6A, NUP88, LAMP2, SRP54, SRP14, HSPA4, ZFYVE16, PEX1, RAB10, MED1, SPCS2, RPL17-C18orf32, RANBP6, RPL17, CEP57, RPL9, PEX2, BMP4,…
GO:0000447	endonucleolytic cleavage in ITS1 to sepa...	8	1	0.03	56	0.02832	0.02832	1	1	Endonucleolytic cleavage between the SSU-rRNA and the 5.8S rRNA of an rRNA molecule originally produced as a tricistronic rRNA transcript that contained the Small SubUnit (SSU) rRNA, the 5.8S rRNA, and the Large SubUnit (LSU) rRNA, in that order, from 5' to 3' along the primary transcript	0.314969	0.314969	RPSA, RPS21, FCF1
GO:0030728	ovulation	8	1	0.03	57	0.02832	0.02832	1	1	The release of a mature ovum/oocyte from an ovary	0.2433	0.2433	ADAMTS1, FOXO3
GO:0033148	positive regulation of intracellular est...	8	1	0.03	58	0.02832	0.02832	1	1	Any process that activates or increases the frequency, rate or extent of the activity of an intracellular estrogen receptor signaling pathway	0.0174935	0.0174935	SKP2	DDX5, DDX17, MED1
GO:0055015	ventricular cardiac muscle cell developm...	8	1	0.03	59	0.02832	0.02832	1	1	The process whose specific outcome is the progression of a ventricular cardiac muscle cell over time, from its formation to the mature state. Cardiac muscle cells are striated muscle cells that are responsible for heart contraction. The ventricle is the part of the heart that pumps blood out of the organ	0.0157364	0.0157364	CDK1, LMNA	ATG5, MYH10
GO:0030260	entry into host cell	76	2	0.27	60	0.03006	0.03006	1	1	The invasion by an organism of a cell of its host organism. The host is defined as the larger of the organisms involved in a symbiotic interaction	0.545497	-0.908368	RPSA, UBC, TRIM5, CBL, LDLR, P4HB, SIVA1, RPS27A	ITGB1, XPR1, SNX3, AC068234.1, WWP1, KPNA3, CBLL1, ZNF639, FUCA2, AXL, MET, TRIM21, PPIA, SCARB2, SRC
GO:0042775	mitochondrial ATP synthesis coupled elec...	76	2	0.27	1029	0.03006	1	1	1	The transfer of electrons through a series of electron donors and acceptors, generating energy that is ultimately used for synthesis of ATP, as it occurs in the mitochondrial inner membrane or chloroplast thylakoid membrane	0.616662	-0.587	UQCRHL, NDUFA11, NDUFA2, NDUFB2, MECP2, CDK1, NDUFB6, NDUFA9, UQCRQ, COX10, TAZ	UQCRB, NDUFS1, AP003108.2, PMPCB, NDUFA12, NDUFB1, NDUFA6
GO:0044409	entry into host	76	2	0.27	61	0.03006	0.03006	1	1	Penetration by an organism into the body, tissues, or cells of the host organism. The host is defined as the larger of the organisms involved in a symbiotic interaction	0.545497	-0.908368	RPSA, UBC, TRIM5, CBL, LDLR, P4HB, SIVA1, RPS27A	ITGB1, XPR1, SNX3, AC068234.1, WWP1, KPNA3, CBLL1, ZNF639, FUCA2, AXL, MET, TRIM21, PPIA, SCARB2, SRC
GO:0051806	entry into cell of other organism involv...	76	2	0.27	62	0.03006	0.03006	1	1	The invasion by an organism of a cell of a second organism, where the two organisms are in a symbiotic interaction	0.545497	-0.908368	RPSA, UBC, TRIM5, CBL, LDLR, P4HB, SIVA1, RPS27A	ITGB1, XPR1, SNX3, AC068234.1, WWP1, KPNA3, CBLL1, ZNF639, FUCA2, AXL, MET, TRIM21, PPIA, SCARB2, SRC
GO:0051828	entry into other organism involved in sy...	76	2	0.27	63	0.03006	0.03006	1	1	Penetration by an organism into the body, tissues, or cells of a second organism, where the two organisms are in a symbiotic interaction	0.545497	-0.908368	RPSA, UBC, TRIM5, CBL, LDLR, P4HB, SIVA1, RPS27A	ITGB1, XPR1, SNX3, AC068234.1, WWP1, KPNA3, CBLL1, ZNF639, FUCA2, AXL, MET, TRIM21, PPIA, SCARB2, SRC
GO:0042773	ATP synthesis coupled electron transport	77	2	0.28	1030	0.03079	1	1	1	The transfer of electrons through a series of electron donors and acceptors, generating energy that is ultimately used for synthesis of ATP	0.616662	-0.587	UQCRHL, NDUFA11, NDUFA2, NDUFB2, MECP2, CDK1, NDUFB6, NDUFA9, UQCRQ, COX10, TAZ	UQCRB, NDUFS1, AP003108.2, PMPCB, NDUFA12, NDUFB1, NDUFA6
GO:1904668	positive regulation of ubiquitin protein...	77	2	0.28	64	0.03079	0.03079	1	1		0.594875	-0.916743	PSMA6, ANAPC7, UBC, CDK1, ANAPC11, ANAPC2, RPS27A, GORASP1	PSMD5, PSMD12, PSMA1, ANAPC10, PSMC6, CDC23, PSMA4, RAB1A, PSMD14, PSMD6, UBE2E1, CDC27, PSMD7
GO:0007084	mitotic nuclear envelope reassembly	9	1	0.03	65	0.03181	0.03181	1	1	The cell cycle process that results in reformation of the nuclear envelope during mitotic cell division	0.118167	0.118167	LMNA	PPP2R2A
GO:0009143	nucleoside triphosphate catabolic proces...	9	1	0.03	1031	0.03181	1	1	1	The chemical reactions and pathways resulting in the breakdown of a nucleoside triphosphate, a compound consisting of a nucleobase linked to a deoxyribose or ribose sugar esterified with triphosphate on the sugar	0.11893	0.11893	DCTPP1, SAMHD1, ITPA	SMPDL3A
GO:0060413	atrial septum morphogenesis	9	1	0.03	66	0.03181	0.03181	1	1	The developmental process in which atrial septum is generated and organized. The atrial septum separates the upper chambers (the atria) of the heart from one another	-0.106952	-0.106952	CYR61	ISL1, NOTCH2
GO:0060669	embryonic placenta morphogenesis	9	1	0.03	67	0.03181	0.03181	1	1	The process in which the embryonic placenta is generated and organized	0.0241639	0.0241639	CYR61	ZFP36L1, NCOA1
GO:0090343	positive regulation of cell aging	9	1	0.03	68	0.03181	0.03181	1	1	Any process that increases the rate, frequency, or extent of cell aging. Cell aging is the progression of the cell from its inception to the end of its lifespan	-0.00129789	-0.00129789	KRAS, LMNA	EEF1E1, HMGA2
GO:1902914	regulation of protein polyubiquitination	9	1	0.03	69	0.03181	0.03181	1	1	Any process that modulates the frequency, rate or extent of protein polyubiquitination	0.0348175	0.0348175	SKP2, XIAP	TRIP12
GO:0051444	negative regulation of ubiquitin-protein...	79	2	0.28	70	0.03228	0.03228	1	1	Any process that stops, prevents, or reduces the frequency, rate or extent of ubiquitin transferase activity	0.588062	-0.898515	PSMA6, ANAPC7, UBC, CDK1, ANAPC11, ANAPC2, RPS27A	PSMD5, PSMD12, PSMA1, ANAPC10, PSMC6, CDC23, PSMA4, PSMD14, PSMD6, UBE2E1, CDC27, PSMD7
GO:2000060	positive regulation of protein ubiquitin...	79	2	0.28	71	0.03228	0.03228	1	1	Any process that activates or increases the frequency, rate or extent of protein ubiquitination involved in ubiquitin-dependent protein catabolic process	0.601813	-0.898515	PSMA6, ANAPC7, UBC, CDK1, ANAPC11, ANAPC2, CCDC22, RPS27A	PSMD5, PSMD12, PSMA1, ANAPC10, PSMC6, CDC23, PSMA4, PSMD14, PSMD6, UBE2E1, CDC27, PSMD7
GO:0015980	energy derivation by oxidation of organi...	196	3	0.7	540	0.03233	0.40808	1	1	The chemical reactions and pathways by which a cell derives energy from organic compounds; results in the oxidation of the compounds from which energy is released	0.765855	-0.834576	PPP1R3D, PNPT1, D2HGDH, UQCRHL, NDUFA11, UBC, NDUFA2, NDUFB2, MECP2, PYGB, GSK3B, CDK1, NDUFB6, NDUFA9, HIF1A, UQCRQ, STK40, STBD1, COX10, RPS27A, IRS1, PPP1CB, TAZ	UGP2, UQCRB, FASTKD3, NDUFS1, CALM2, ALDH5A1, AP003108.2, PMPCB, IDH3A, GFPT1, NDUFA12, GYG1, PPP1R3E, PDHB, NOA1, ETFDH, NNT, NDUFB1, FASTKD2, SLC25A13, PPP1CC, NDUFA6, PANK2
GO:0000082	G1/S transition of mitotic cell cycle	198	3	0.71	72	0.03318	0.03318	1	1	The mitotic cell cycle transition by which a cell in G1 commits to S phase. The process begins with the build up of G1 cyclin-dependent kinase (G1 CDK), resulting in the activation of transcription of G1 cyclins. The process ends with the positive feedback of the G1 cyclins on the G1 CDK which commits the cell to S phase, in which DNA replication is initiated	0.789296	-1.20913	SKP2, KIF14, NPAT, UBC, RPA3, GFI1, PIDD1, MDM4, CDK1, FBXO31, USP37, MUC1, CHEK2, RDX, RBL2, RPS27A, RPS27L, MCM2	ITGB1, POLE2, MTBP, GSPT1, PRIM1, PCNA, NPM1, ZNF655, MNAT1, PLRG1, DBF4, EGFR, ORC5, IQGAP3, CCNH, LATS2, RBBP8, CDC7, EIF4E, CASP2, UBE2E2, RPS6KB1, CDK6, ID2, CNOT2, CUL2, CNOT1, TRIAP1, CDKN2B, POLA1, CUL5
GO:0034622	cellular macromolecular complex assembly	691	6	2.48	719	0.03346	0.61716	1	1	The aggregation, arrangement and bonding together of a set of macromolecules to form a complex, carried out at the cellular level	0.997916	-1.3972	KAT6A, MZT1, ARHGAP18, IPO4, H3F3A, SNAP29, GTF2H3, SLAIN2, VILL, TAF9B, FCHSD2, MTPN, RPSA, NDUFA11, ARPC1B, TAF4, PRKCE, SPIRE2, UBC, MYOM2, RPA3, ARFIP1, HIST1H2BJ, PET100, SMAD4, NDUFA2, ARMC4, BIN1, KNL1, RPS10, WASF3, DDX6, NDUFB2, MECP2, KAT6B, PREX1, THRA, RPS19, EDC3, NLRP3, UQCC2, COX14, RPL10, OPA1, NDUFB6, MIS18BP1, HJURP, CTTN, H1FX, NDUFA9, ACTR2, SNAP23, RICTOR, ARF6, GEMIN8, COX10…	PSMD5, CETN2, HAT1, SLU7, SRP19, RPF1, BRIX1, CREB1, PFN2, ARPC5, GTF2B, ITGB3BP, UQCRB, HSP90AA1, CENPQ, PTGES3, EIF2AK2, DNM1L, RASA1, NAP1L1, RTN4, NCK1, TOMM20, EIF2A, NPM1, TAF9, PUM2, PSMC6, SEC24B, NDUFS1, CAPZA2, SBDS, PSMG1, ATPAF1, TMOD1, STRAP, CENPI, MNAT1, PSMG2, CAPZA1, TCP1, GTF2H1, AP003108.2, VAMP3, DNAAF5, CCNH, MTERF3, NUP205, SENP6, GREM1, RAB1A, SET, ACTR3, SRP54, FGF13, EXOC…
GO:0034470	ncRNA processing	346	4	1.24	208	0.03377	0.11515	1	1	Any process that results in the conversion of one or more primary non-coding RNA (ncRNA) transcripts into one or more mature ncRNA molecules	0.803868	-1.2031	C1D, EXOSC6, OSGEP, TRUB1, RPSA, POP1, RPL31, RPS10, NSUN5P1, RPS21, INTS2, RPS19, LAGE3, RPL41, RPL21, DHX37, RPS29, RPS8, RPL10, RPS12, RPL35A, FCF1, UTP11, RPL37A, NSUN5, TRMT10A, RIOK2, RPS27A, NPM3, RRNAD1, CTU1, RPS23, RPL34, GTPBP3, AGO2, RPLP2, TRMT10C, SMAD3, NSUN6, TSEN54	RPL39, MTREX, RPF1, INTS8, DIS3, MPHOSPH10, INTS7, INTS6, UTP3, RPL15, MRPL1, WDR75, DDX21, TSEN15, NOP58, PUS7L, ALKBH8, SBDS, RRP15, HEATR1, LCMT2, RTRAF, EXOSC3, TRMT11, TRMT61B, RPL36A, THUMPD1, ALKBH1, MRPS9, SSB, PRKRA, MAK16, INTS12, UTP4, KIAA0391, RPL17-C18orf32, OSGEPL1, FRG1, RPL17, RPL9, IMP4, SMAD2, NOL11, MTO1, MTFMT, UTP15, EXOSC9, LTV1, PUS3, SMAD1, PUS7, RRP7BP
GO:0051606	detection of stimulus	81	2	0.29	1032	0.0338	1	1	1	The series of events in which a stimulus is received by a cell or organism and converted into a molecular signal	0.484889	-0.820559	UBC, RPA3, NLRP3, RFC1, RPS27A, DENND5B	COL11A1, PCNA, LY96, CALM2, CADM1, RFC4, DNAJA1, MRPS9, CCDC66, DTL, RDH11, FNTA, HMGA2
GO:0033108	mitochondrial respiratory chain complex ...	82	2	0.29	73	0.03456	0.03456	1	1	The aggregation, arrangement and bonding together of a set of components to form a mitochondrial respiratory chain complex	0.575066	-0.605119	NDUFA11, PET100, NDUFA2, NDUFB2, UQCC2, COX14, NDUFB6, NDUFA9, NDUFAF4, TAZ	UQCRB, NDUFS1, AP003108.2, NDUFA12, NDUFAF6, SDHAF3, NUBPL, NDUFB1, NDUFA6
GO:0009057	macromolecule catabolic process	890	7	3.19	1033	0.03474	1	1	1	The chemical reactions and pathways resulting in the breakdown of a macromolecule, any molecule of high relative molecular mass, the structure of which essentially comprises the multiple repetition of units derived, actually or conceptually, from molecules of low relative molecular mass	1.02636	-1.48036	RNF6, SKP2, PSMA6, KIF14, GPC2, EGLN2, PPP1R3D, EXOSC6, ADAM9, PNPT1, ANAPC7, RPSA, SOCS4, UBXN2A, UBC, RNF11, POP1, RPL31, DNA2, TNRC6B, PTPN3, RPS10, DDX6, RPS21, RNF166, MDM4, PYGB, GSK3B, SUFU, POMT2, LNPEP, RAB12, CBL, RPS19, LDLR, ZHX2, RPL41, FBXL19, EDEM1, LSM5, CDK1, EDC3, RPL21, DNAJC3, FBXO31, UQCC2, RPS29, ANAPC11, ERLEC1, RPS8, RPL10, ANAPC2, RPS12, RPL35A, USP37, UBR2, AMFR, CCDC22,…	PSMD5, OMA1, PPT1, UBE2D3, RPL39, LYPLA1, MTREX, GSPT1, RNASEH2B, UCHL5, PSMD12, USP25, EIF3E, NFE2L2, TENT2, AZIN1, DIS3, PAIP1, HPSE, GSPT2, RPL15, TMTC3, HSP90AA1, FMN2, TMF1, USP14, TATDN1, HMMR, PSMA1, ANAPC10, VPS37A, LUM, UBE2N, VPS36, BNIP3L, LYPLAL1, SMURF2, SNX3, SUMO1, TAF9, TRIM13, PSMC6, ZMPSTE24, CRBN, TOPORS, CDC23, WWP1, SDCBP, CALM2, UPF2, PPP2R5C, OPHN1, PSMA4, UBE3A, EGFR, BBS7…
GO:0003283	atrial septum development	10	1	0.04	74	0.03528	0.03528	1	1	The progression of the atrial septum over time, from its initial formation to the mature structure	-0.116089	-0.116089	CYR61	ISL1, NOTCH2
GO:0009223	pyrimidine deoxyribonucleotide catabolic...	10	1	0.04	1034	0.03528	1	1	1	The chemical reactions and pathways resulting in the breakdown of a pyrimidine deoxyribonucleotide, a compound consisting of nucleoside (a pyrimidine base linked to a deoxyribose sugar) esterified with a phosphate group at either the 3' or 5'-hydroxyl group of the sugar	0.00773359	0.00773359	DCTPP1, NEIL2	UNG, MBD4, OGG1
GO:0031125	rRNA 3'-end processing	10	1	0.04	1035	0.03528	1	1	1	Any process involved in forming the mature 3' end of an rRNA molecule	0.180209	0.180209	EXOSC6, RPSA, RPS21	EXOSC3
GO:0060561	apoptotic process involved in morphogene...	10	1	0.04	1036	0.03528	1	1	1	Any apoptotic process that contributes to the shaping of an anatomical structure	0.192558	0.192558	CYR61, SCRIB, NOTCH1, VDR, BAK1
GO:0003205	cardiac chamber development	83	2	0.3	75	0.03534	0.03534	1	1	The progression of a cardiac chamber over time, from its formation to the mature structure. A cardiac chamber is an enclosed cavity within the heart	0.796507	-0.78326	ADAMTS1, TMEM65, CYR61, LTBP1, TBX2, SMAD4, DCTN5, SUFU, TGFBR1, NOTCH1, HIF1A, TBX3, SNX17, TGFB1	DVL3, COL11A1, CPE, ISL1, LMO4, FKBP1A, NOTCH2, MED1, ID2, BMP4, SEMA3C, WNT5A, EGLN1, RARB, MYH10, RBPJ, PKP2
GO:0046467	membrane lipid biosynthetic process	83	2	0.3	1037	0.03534	1	1	1	The chemical reactions and pathways resulting in the formation of membrane lipids, any lipid found in or associated with a biological membrane	0.633028	-0.652387	CERS2, PRKAA1, CYR61, DEGS1, ST3GAL5, PIGW, SPHK1, CSNK1G2, ORMDL3, ALDH3A2, A4GALT	PRKD3, PIGC, VAPA, PLPP1, DPM1, SPTSSA, PIGP, PIGU, CERKL, HACD2, PIGS, AGK, SAMD8
GO:1904666	regulation of ubiquitin protein ligase a...	83	2	0.3	76	0.03534	0.03534	1	1		0.594875	-0.916743	PSMA6, ANAPC7, UBC, CDK1, ANAPC11, ANAPC2, RPS27A, GORASP1	PSMD5, PSMD12, PSMA1, ANAPC10, PSMC6, CDC23, PSMA4, RAB1A, PSMD14, PSMD6, UBE2E1, CDC27, PSMD7
GO:0006412	translation	520	5	1.86	761	0.03578	0.6729	1	1	The cellular metabolic process in which a protein is formed, using the sequence of a mature mRNA molecule to specify the sequence of amino acids in a polypeptide chain. Translation is mediated by the ribosome, and begins with the formation of a ternary complex between aminoacylated initiator methionine tRNA, GTP, and initiation factor 2, which subsequently associates with the small subunit of the…	0.77609	-1.24102	MEX3D, GTF2H3, SECISBP2L, MTPN, RPSA, EIF2B1, RPL31, IGFBP5, TNRC6B, SERP1, RPS10, DDX6, LARP4, RPS21, MRPL54, RPS19, RPL41, FOXO3, MRPS21, RPL21, DAPK3, DNAJC3, UQCC2, RPS29, RPS8, RPL10, RPS12, RPL35A, RPL22L1, EIF1AX, PTBP1, SARS2, RPL37A, RPS27A, GTF2H2, TIA1, RPS23, RPS27L, RPL34, EIF2AK4, AGO2, EIF2S2, RPLP2, CHCHD1, TRMT10C, EIF4G3, SMAD3, MRPL44, CELF1, YTHDF1, TGFB1, MRPL46, MAP2K1, TNIP1	RPL39, MRPS30, EIF3M, GSPT1, EIF3E, PAIP1, GSPT2, RPL15, MRPL3, EIF2AK2, MRPL1, NCK1, IARS, FAM129A, EIF2A, PPP1R15B, NPM1, IREB2, PUM2, EIF1B, EEF1E1, C12orf65, RARS, CAPRIN1, EIF3J, DARS2, EGFR, EIF3H, DDX5, HNRNPR, RMND1, MTIF3, RPL36A, ALKBH1, GARS, MRPS9, WARS2, TNRC6A, FMR1, YAE1D1, SSB, PRKRA, MALSU1, DND1, RGS2, EIF4B, EIF4E, MRPS27, TARS, C8orf88, RPS6KB1, AC079447.1, CNOT2, RPL17-C18orf…
GO:0001503	ossification	204	3	0.73	564	0.03579	0.42993	1	1	The formation of bone or of a bony substance, or the conversion of fibrous tissue or of cartilage into bone or a bony substance	0.837811	-0.913579	FGFR3, H3F3A, TOB2, SMAD5, KREMEN1, CYR61, FIGNL1, RASSF2, IGFBP5, OSTF1, PLXNB1, MEF2D, LGR4, SUFU, THRA, SBNO2, SEMA7A, NOTCH1, HIF1A, RUNX1, PKDCC, TWIST2, WNT10B, SMAD3, TGFB1	COL11A1, MINPP1, SPP1, DDX21, IARS, SBDS, DHX36, PIAS2, EGFR, CBFB, DDX5, TFAP2A, GREM1, COL5A2, AREG, SP3, RBMX, CDK6, TXLNG, DKK1, ID2, TPM4, DNAJC13, BMP4, IMPAD1, HNRNPC, NAB1, NF1, TWSG1, RRAS2, SMAD1, WNT5A, RBPJ
GO:0031396	regulation of protein ubiquitination	204	3	0.73	77	0.03579	0.03579	1	1	Any process that modulates the frequency, rate or extent of the addition of ubiquitin groups to a protein	0.818274	-1.11209	SKP2, PSMA6, ANAPC7, PRKCE, CDK9, NDFIP2, UBXN2A, UBC, BRCA1, SUFU, TGFBR1, XIAP, CDK1, ANAPC11, ANAPC2, CCDC22, BMI1, SPHK1, TSPO, RASSF5, NDFIP1, RPS27A, GORASP1, HSPA5	PSMD5, ARRDC3, PSMD12, HSP90AA1, PSMA1, ANAPC10, DCUN1D5, UBE2N, PSMC6, TOPORS, CDC23, PSMA4, UBE3A, ATG5, DNAJA1, RAB1A, DERL1, DCUN1D4, GLMN, FKBP1A, RNF20, PSMD14, TRIP12, PSMD6, UBE2E1, CDC27, RIPK2, GNL3L, PTTG1IP, PSMD7
GO:0090305	nucleic acid phosphodiester bond hydroly...	204	3	0.73	1038	0.03579	1	1	1	The nucleic acid metabolic process in which the phosphodiester bonds between nucleotides are cleaved by hydrolysis	0.789116	-0.994129	POLR3K, GTF2H3, PNPT1, RPSA, UBC, RPA3, POP1, GEN1, DNA2, DCLRE1B, RPS21, EDC3, RNASEK, FCF1, RFC1, APEX2, RPS27A, REXO5, GTF2H2, AGO2, KPNA1, MRPL44, CASP3, TSEN54	RNASEH2B, DIS3, PCNA, DCLRE1C, TATDN1, MRPL1, TSEN15, REXO2, TSN, PCF11, RFC4, GTF2H1, EXOSC3, EXD2, RBBP8, TDP2, EXOG, SETMAR, FIP1L1, ENPP2, KIAA0391, PNRC2, LACTB2, CNOT2, ERN1, CNOT1, EXOSC9, EXO1, OGG1, POLA1
GO:0044843	cell cycle G1/S phase transition	205	3	0.73	78	0.03623	0.03623	1	1	The cell cycle process by which a cell in G1 phase commits to S phase	0.789296	-1.20913	SKP2, KIF14, NPAT, UBC, RPA3, GFI1, PIDD1, MDM4, CDK1, FBXO31, USP37, MUC1, CHEK2, RDX, RBL2, RPS27A, RPS27L, MCM2	ITGB1, POLE2, MTBP, GSPT1, PRIM1, PCNA, NPM1, ZNF655, MNAT1, PLRG1, DBF4, EGFR, ORC5, IQGAP3, CCNH, LATS2, RBBP8, ATP2B4, CDC7, EIF4E, CASP2, UBE2E2, RPS6KB1, CDK6, ID2, CNOT2, CUL2, CNOT1, TRIAP1, CDKN2B, POLA1, CUL5
GO:0009141	nucleoside triphosphate metabolic proces...	209	3	0.75	1039	0.03804	1	1	1	The chemical reactions and pathways involving a nucleoside triphosphate, a compound consisting of a nucleobase linked to a deoxyribose or ribose sugar esterified with triphosphate on the sugar	0.69927	-0.925725	UQCRHL, PRKAA1, NDUFA11, FIGNL1, NDUFA2, DCTPP1, NDUFB2, MECP2, PFKFB4, NME3, CDK1, UQCC2, PARG, FLCN, SAMHD1, NDUFB6, NDUFA9, HIF1A, UQCRQ, COX10, TSPO, ITPA, UCK1, IMPDH1, SIRT6, TGFB1, TAZ	ATP5F1EP2, RHOQ, UQCRB, DNM1L, MSH2, NDUFS1, AP003108.2, ATP5F1C, MOCS2, MBIP, PMPCB, NDUFA12, AK3, CMPK1, TBPL1, RRM2B, BPGM, CTPS1, NFS1, GAPDH, HSPA8, NDUFB1, SLC25A13, SMPDL3A, NDUFA6, AK9
GO:0003181	atrioventricular valve morphogenesis	11	1	0.04	79	0.03875	0.03875	1	1	The process in which the structure of the atrioventricular valve is generated and organized	0.254053	0.140515	CYR61, SMAD4, NOTCH1, EFNA1
GO:0006244	pyrimidine nucleotide catabolic process	11	1	0.04	1040	0.03875	1	1	1	The chemical reactions and pathways resulting in the breakdown of a pyrimidine nucleotide, a compound consisting of nucleoside (a pyrimidine base linked to a deoxyribose or ribose sugar) esterified with a phosphate group at either the 3' or 5'-hydroxyl group of the sugar	0.0826308	-0.0443171	DCTPP1, NEIL2	UNG, MBD4, OGG1
GO:0045671	negative regulation of osteoclast differ...	11	1	0.04	80	0.03875	0.03875	1	1	Any process that stops, prevents, or reduces the frequency, rate or extent of osteoclast differentiation	-0.19734	-0.455764	TOB2	ZNF675, LRRC17, PIK3R1, NF1, UBASH3B
GO:0060716	labyrinthine layer blood vessel developm...	11	1	0.04	81	0.03875	0.03875	1	1	The process whose specific outcome is the progression of a blood vessel of the labyrinthine layer of the placenta over time, from its formation to the mature structure. The embryonic vessels grow through the layer to come in close contact with the maternal blood supply	0.13506	0.0154747	CYR61, PLCD1	FBXW8, RBPJ
GO:0043043	peptide biosynthetic process	534	5	1.91	770	0.03946	0.6878	1	1	The chemical reactions and pathways resulting in the formation of peptides, compounds of 2 or more (but usually less than 100) amino acids where the alpha carboxyl group of one is bound to the alpha amino group of another. This may include the translation of a precursor protein and its subsequent processing into a functional peptide	0.77609	-1.27627	MEX3D, GTF2H3, SECISBP2L, MTPN, RPSA, EIF2B1, RPL31, IGFBP5, TNRC6B, SERP1, RPS10, DDX6, LARP4, RPS21, MRPL54, GGT7, RPS19, RPL41, FOXO3, MRPS21, RPL21, DAPK3, DNAJC3, UQCC2, RPS29, RPS8, RPL10, RPS12, RPL35A, RPL22L1, EIF1AX, PTBP1, SARS2, RPL37A, RPS27A, GTF2H2, TIA1, RPS23, RPS27L, RPL34, EIF2AK4, AGO2, EIF2S2, RPLP2, CHCHD1, TRMT10C, EIF4G3, SMAD3, MRPL44, CELF1, YTHDF1, TGFB1, MRPL46, MAP2K1…	RPL39, MRPS30, EIF3M, GSPT1, EIF3E, NFE2L2, PAIP1, AASDH, GSPT2, RPL15, MRPL3, EIF2AK2, MRPL1, NCK1, IARS, FAM129A, EIF2A, PPP1R15B, NPM1, IREB2, PUM2, EIF1B, EEF1E1, C12orf65, RARS, CAPRIN1, EIF3J, DARS2, EGFR, EIF3H, DDX5, HNRNPR, RMND1, MTIF3, RPL36A, ALKBH1, GARS, MRPS9, WARS2, TNRC6A, FMR1, YAE1D1, SSB, PRKRA, MALSU1, DND1, RGS2, EIF4B, EIF4E, MRPS27, GGCT, TARS, C8orf88, RPS6KB1, AC079447.1…
GO:0008285	negative regulation of cell proliferatio...	364	4	1.3	82	0.03959	0.03959	1	1	Any process that stops, prevents or reduces the rate or extent of cell proliferation	0.884048	-1.13815	ADAMTS1, CERS2, TAX1BP3, SOD2, TOB2, IGFBP5, SMAD4, ATOH8, PLXNB1, MDM4, KISS1, JARID2, PBRM1, RNF10, TGFBR1, GATA2, CASK, FLCN, MAGED1, FAM129B, PTPRJ, LMNA, TFAP4, IFT122, NOTCH1, TSPO, RASSF5, NDFIP1, VDR, TRIM32, CTSV, ING4, JUN, NFIB, BRCA2, WNT10B, XDH, WDR77, BAK1, RAPGEF1, SMAD3, SIRT6, CASP3, RBM5, TGFB1, BAP1, HRAS, F2R, MAP2K1	MTBP, NRK, NOV, PDCD10, MARCH7, LYN, STAT1, EIF2AK2, KRIT1, IFT74, NPM1, EEF1E1, PRNP, STRAP, PPP2R5C, C18orf54, NKX3-1, SH3BP4, TFAP2A, PLPP1, GREM1, HIST1H2AC, BCHE, KIFAP3, SYNJ2BP, SKAP2, PRKRA, GLMN, COPS8, NOTCH2, RBBP4, MED1, CDK6, ID2, RC3H1, VEGFC, ZEB1, RAPGEF2, CUL2, STK3, PEX2, SMAD2, BMP4, PTPRK, ASPH, SERPINF1, CDKN2B, NF1, SPRY2, GAS8, TWSG1, ROBO1, GJA1, SMAD1, KAT2B, WNT5A, FOSL1…
GO:0022900	electron transport chain	89	2	0.32	1041	0.04013	1	1	1	A process in which a series of electron carriers operate together to transfer electrons from donors to any of several different terminal electron acceptors to generate a transmembrane electrochemical gradient	0.654006	-0.646803	D2HGDH, UQCRHL, NDUFA11, NDUFA2, NDUFB2, MECP2, CDK1, NDUFB6, NDUFA9, UQCRQ, COX10, TAZ	UQCRB, NDUFS1, ALDH5A1, AP003108.2, PMPCB, NDUFA12, ETFDH, NDUFB1, SLC25A13, NDUFA6
GO:0022904	respiratory electron transport chain	89	2	0.32	1042	0.04013	1	1	1	A process in which a series of electron carriers operate together to transfer electrons from donors such as NADH and FADH2 to any of several different terminal electron acceptors to generate a transmembrane electrochemical gradient	0.654006	-0.646803	D2HGDH, UQCRHL, NDUFA11, NDUFA2, NDUFB2, MECP2, CDK1, NDUFB6, NDUFA9, UQCRQ, COX10, TAZ	UQCRB, NDUFS1, ALDH5A1, AP003108.2, PMPCB, NDUFA12, ETFDH, NDUFB1, SLC25A13, NDUFA6
GO:0034976	response to endoplasmic reticulum stress	214	3	0.77	83	0.04037	0.04037	1	1	Any process that results in a change in state or activity of a cell (in terms of movement, secretion, enzyme production, gene expression, etc.) as a result of a stress acting at the endoplasmic reticulum. ER stress usually results from the accumulation of unfolded or misfolded proteins in the ER lumen	0.755566	-1.09923	TMX1, SELENOK, SERP1, GSK3B, POMT2, EDEM1, FKBP14, DNAJC3, ERLEC1, OPA1, LMNA, ATF3, AMFR, BFAR, P4HB, UBAC2, ERP29, JUN, EIF2AK4, BAK1, HSPA5, TMEM67	SEC31A, USP25, NFE2L2, PIK3R1, MBTPS2, TMTC3, EIF2AK2, USP14, KDELR3, ERO1A, NCK1, FAM129A, PPP1R15B, SEC61A2, TRIM13, PSMC6, STC2, UBA5, NRBF2, GFPT1, JKAMP, DERL1, TBL2, SERINC3, SHC1, TPP1, ERN1, TMX3, TMEM33, DNAJC10, ATF6B, PDIA6, TXNDC12, PPP2CB
GO:0006119	oxidative phosphorylation	90	2	0.32	1043	0.04096	1	1	1	The phosphorylation of ADP to ATP that accompanies the oxidation of a metabolite through the operation of the respiratory chain. Oxidation of compounds establishes a proton gradient across the membrane, providing the energy for ATP synthesis	0.621902	-0.680391	UQCRHL, NDUFA11, NDUFA2, NDUFB2, MECP2, CDK1, UQCC2, NDUFB6, NDUFA9, UQCRQ, COX10, TAZ	UQCRB, MSH2, NDUFS1, AP003108.2, ATP5F1C, PMPCB, NDUFA12, NDUFB1, NDUFA6
GO:0051443	positive regulation of ubiquitin-protein...	91	2	0.33	84	0.04178	0.04178	1	1	Any process that activates, maintains or increases the rate of ubiquitin transferase activity	0.607931	-1.08799	PSMA6, ANAPC7, UBC, CDK1, ANAPC11, ANAPC2, BMI1, RPS27A, GORASP1	PSMD5, ARRDC3, PSMD12, PSMA1, ANAPC10, DCUN1D5, UBE2N, PSMC6, TOPORS, CDC23, PSMA4, RAB1A, DCUN1D4, PSMD14, PSMD6, UBE2E1, CDC27, PSMD7
GO:2000058	regulation of protein ubiquitination inv...	91	2	0.33	85	0.04178	0.04178	1	1	Any process that modulates the frequency, rate or extent of protein ubiquitination involved in ubiquitin-dependent protein catabolic process	0.626282	-0.92575	PSMA6, ANAPC7, UBC, SUFU, CDK1, ANAPC11, ANAPC2, CCDC22, RPS27A	PSMD5, PSMD12, PSMA1, ANAPC10, PSMC6, CDC23, PSMA4, UBE3A, PSMD14, PSMD6, UBE2E1, CDC27, PSMD7
GO:0000478	endonucleolytic cleavage involved in rRN...	12	1	0.04	1044	0.04219	1	1	1	Any endonucleolytic cleavage involved in the conversion of a primary ribosomal RNA (rRNA) transcript into a mature rRNA molecule. Some endonucleolytic cleavages produce the mature end, while others are a step in the process of generating the mature end from the pre-rRNA	0.295107	0.108062	RPSA, RPS21, FCF1
GO:0000479	endonucleolytic cleavage of tricistronic...	12	1	0.04	1045	0.04219	1	1	1	Endonucleolytic cleavage of a pre-rRNA molecule originally produced as a tricistronic rRNA transcript that contains the Small SubUnit (SSU) rRNA, the 5.8S rRNA, and the Large SubUnit (LSU) rRNA, in that order, from 5' to 3' along the primary transcript. Primary ribosomal RNA transcripts with three genes, in this order, are produced in the nuclei of many eukaryotic species, including S. cerevisiae	0.295107	0.108062	RPSA, RPS21, FCF1
GO:0003171	atrioventricular valve development	12	1	0.04	86	0.04219	0.04219	1	1	The progression of the atrioventricular valve over time, from its formation to the mature structure	0.278594	0.0692306	CYR61, SMAD4, NOTCH1, EFNA1
GO:0008298	intracellular mRNA localization	12	1	0.04	1046	0.04219	1	1	1	Any process in which mRNA is transported to, or maintained in, a specific location within the cell	-0.00619753	-0.243539	MEX3D	EXOSC3, ZFP36L1
GO:0055012	ventricular cardiac muscle cell differen...	12	1	0.04	87	0.04219	0.04219	1	1	The process in which a relatively unspecialized cell acquires specialized features of a ventricular cardiac muscle cell. Cardiac muscle cells are striated muscle cells that are responsible for heart contraction. The ventricle is the part of the heart that pumps blood out of the organ	0.09774	-0.124695	CDK1, LMNA	ATG5, RARB, MYH10
GO:0090153	regulation of sphingolipid biosynthetic ...	12	1	0.04	88	0.04219	0.04219	1	1	Any process that modulates the rate, frequency or extent of sphingolipid biosynthesis. Sphingolipid biosynthesis is the chemical reactions and pathways resulting in the formation of sphingolipids, any of a class of lipids containing the long-chain amine diol sphingosine or a closely related base (a sphingoid)	0.203855	-0.0304987	PRKAA1, CYR61, ORMDL3	SAMD8
GO:1902742	apoptotic process involved in developmen...	12	1	0.04	1047	0.04219	1	1	1	Any apoptotic process that is involved in anatomical structure development	0.297183	0.0949681	CYR61, SCRIB, NOTCH1, VDR, BAK1
GO:1905038	regulation of membrane lipid metabolic p...	12	1	0.04	89	0.04219	0.04219	1	1		0.203855	-0.0304987	PRKAA1, CYR61, ORMDL3	SAMD8
GO:2000303	regulation of ceramide biosynthetic proc...	12	1	0.04	90	0.04219	0.04219	1	1	Any process that modulates the frequency, rate or extent of a ceramide biosynthetic process	0.203855	-0.0304987	PRKAA1, CYR61, ORMDL3	SAMD8
GO:0006665	sphingolipid metabolic process	92	2	0.33	1048	0.04262	1	1	1	The chemical reactions and pathways involving sphingolipids, any of a class of lipids containing the long-chain amine diol sphingosine or a closely related base (a sphingoid)	0.797285	-0.782661	SPNS2, CERS2, PRKAA1, CYR61, ARSI, DEGS1, ST3GAL5, SPHK1, CSNK1G2, ORMDL3, ALDH3A2, A4GALT	PPT1, PRKD3, ARSK, ALDH5A1, VAPA, PLPP1, SPTSSA, SERINC3, CTSA, CERKL, HACD2, AGK, SAMD8
GO:1903320	regulation of protein modification by sm...	222	3	0.8	92	0.04424	0.04424	1	1	Any process that modulates the frequency, rate or extent of protein modification by small protein conjugation or removal	0.832459	-1.11209	SKP2, PSMA6, ANAPC7, PRKCE, CDK9, HMG20A, NDFIP2, UBXN2A, UBC, BRCA1, EGR1, SUFU, TGFBR1, XIAP, CDK1, ANAPC11, ANAPC2, CCDC22, BMI1, SPHK1, TSPO, RASSF5, NDFIP1, RPS27A, GORASP1, HSPA5	PSMD5, ARRDC3, PSMD12, HSP90AA1, PSMA1, ANAPC10, DCUN1D5, UBE2N, PSMC6, TOPORS, CDC23, PSMA4, UBE3A, ATG5, DNAJA1, RAB1A, DERL1, DCUN1D4, GLMN, FKBP1A, RNF20, PSMD14, TRIP12, PSMD6, UBE2E1, CDC27, RIPK2, GNL3L, PTTG1IP, TRIM21, PSMD7, HMG20B
GO:0030278	regulation of ossification	94	2	0.34	1049	0.04431	1	1	1	Any process that modulates the frequency, rate or extent of bone formation	0.690815	-0.613783	TOB2, SMAD5, KREMEN1, CYR61, RASSF2, IGFBP5, SUFU, NOTCH1, HIF1A, PKDCC, TWIST2, WNT10B, SMAD3, TGFB1	PIAS2, DDX5, TFAP2A, GREM1, AREG, CDK6, TXLNG, DKK1, ID2, BMP4, TWSG1, SMAD1, WNT5A, RBPJ
GO:0072657	protein localization to membrane	380	4	1.36	1050	0.04523	1	1	1	A process in which a protein is transported to, or maintained in, a specific location in a membrane	0.857377	-1.30657	FAM126A, TIAM1, TUB, LIN7C, RPSA, PRKCE, RPL31, MYO5A, RAB26, RAB8B, RPS10, RPS21, CDH2, EFR3A, AP3D1, RPS19, RPL41, RPL21, RPS29, RPS8, RPL10, RPS12, RPL35A, PIGW, TOMM7, PPP2R5A, IFT122, SCRIB, ARHGAP44, ARF6, RPL37A, RER1, PPP3R1, MIEF1, RDX, PKDCC, MPP5, CNST, RAMP1, RPS27A, EZR, RPS23, RPL34, MIEF2, KIF13A, PEX5, YWHAG, RAB3GAP2, ATG4B, RPLP2, PACS2, TGFB1, TSPAN14, RAB3GAP1	ITGB1, SRP19, RPL39, LYPLA1, PIK3R1, RHOQ, CPE, RPL15, YWHAZ, HSP90AA1, TMEM59, PEX3, NUP54, RAB11A, EPB41L3, PRNP, SDCBP, CALM2, YWHAH, BLZF1, EGFR, VAMP3, BBIP1, GOLGA7, MFF, SH3GLB1, RPL36A, SRP72, MAPK8, SRP54, FGF13, SRP14, HSPA4, RAB10, RPL17-C18orf32, RAPGEF2, RPL17, RPL9, SRP9, FNTA, ATG4A, MTCL1, RAB8A, RAB31, PDZD11, EMP2, PKP2
GO:0033145	positive regulation of intracellular ste...	13	1	0.05	93	0.04563	0.04563	1	1	Any process that activates or increases the frequency, rate or extent of the activity of any intracellular steroid hormone receptor signaling pathway	0.238294	-0.130617	SKP2	DDX5, DDX17, MED1
GO:0033688	regulation of osteoblast proliferation	13	1	0.05	94	0.04563	0.04563	1	1	Any process that modulates the frequency, rate or extent of osteoblast proliferation	0.217405	-0.250411	CYR61, PLXNB1, SMAD3	HPSE, EIF2AK2, GREM1
GO:0061157	mRNA destabilization	13	1	0.05	95	0.04563	0.04563	1	1	Any process that decreases the stability of an mRNA molecule, making it more vulnerable to degradative processes. Messenger RNA is the intermediate molecule between DNA and protein. It includes UTR and coding sequences. It does not contain introns	0.0891525	-0.24773	MEX3D	HNRNPR, RC3H1, PUM1, ZFP36L1, HNRNPD
GO:0090201	negative regulation of release of cytoch...	13	1	0.05	96	0.04563	0.04563	1	1	Any process that decreases the rate, frequency or extent of release of cytochrome c from mitochondria, the process in which cytochrome c is enabled to move from the mitochondrial intermembrane space into the cytosol, which is an early step in apoptosis and leads to caspase activation	0.201017	-0.0518707	OPA1, LMNA	TRIAP1
GO:1901566	organonitrogen compound biosynthetic pro...	954	7	3.42	895	0.04807	0.90137	1	1	The chemical reactions and pathways resulting in the formation of organonitrogen compound	0.886106	-1.43723	CERS2, GPC2, MEX3D, GTF2H3, ADSS, SECISBP2L, PRKAA1, MTPN, CYR61, RPSA, PSPH, CSGALNACT2, MC1R, PXYLP1, EIF2B1, MRAP, ST3GAL2, RPL31, DEGS1, RFK, IGFBP5, TNRC6B, SERP1, UMPS, RPS10, DDX6, LARP4, RPS21, NAGS, MRPL54, PDXK, GGT7, NME3, RPS19, GPT2, RPL41, FOXO3, DCK, MRPS21, ST3GAL5, RPL21, DAPK3, DNAJC3, UQCC2, RPS29, RPS8, FLCN, RPL10, RPS12, RPL35A, RPL22L1, EIF1AX, CPOX, PTBP1, SARS2, RPL37A, C…	EXTL2, PPCS, ATP5F1EP2, RPL39, MRPS30, EIF3M, GSPT1, LINC02210-CRHR1, EIF3E, NFE2L2, AZIN1, PAIP1, AASDH, PRKD3, ADNP, GSPT2, RPL15, MRPL3, EIF2AK2, MRPL1, LUM, CSNK2A2, NCK1, IARS, FAM129A, EIF2A, PPP1R15B, ARG2, NPM1, GCH1, IREB2, PUM2, EIF1B, NAMPT, EEF1E1, C12orf65, RARS, ESD, CAPRIN1, EIF3J, CALM2, HS2ST1, LCMT2, DARS2, SLC35B3, EGFR, EIF3H, ATP5F1C, MOCS2, DDX5, VAPA, HNRNPR, RMND1, MTIF3, …
GO:0022613	ribonucleoprotein complex biogenesis	390	4	1.4	495	0.04897	0.3609	1	1	A cellular process that results in the biosynthesis of constituent macromolecules, assembly, and arrangement of constituent parts of a complex containing RNA and proteins. Includes the biosynthesis of the constituent RNA and protein molecules, and those macromolecular modifications that are involved in synthesis or assembly of the ribonucleoprotein complex	0.730922	-1.24407	C1D, EXOSC6, RPSA, RPL31, RPS10, DDX6, NSUN5P1, RPS21, ZNF593, RPS19, RPL41, EDC3, RPL21, DHX37, RPS29, RPS8, RPL10, RPS12, RPL35A, FCF1, UTP11, RPL37A, GEMIN8, NOP53, NSUN5, RIOK2, SNRPB, RPS27A, DDX28, NPM3, RRNAD1, RPS23, URB2, RPS27L, RPL34, WDR77, AGO2, RPLP2, TGS1, RBM5, CELF1, GEMIN7	SLU7, RPL39, MTREX, RPF1, BRIX1, DIS3, MPHOSPH10, UTP3, RPL15, HSP90AA1, PTGES3, MRPL1, WDR75, DDX21, EIF2A, NPM1, NOP58, TAF9, PUM2, SBDS, RRP15, HEATR1, STRAP, EXOSC3, MTERF3, TRMT61B, RPL36A, THUMPD1, MRPS9, NUP88, YAE1D1, SDAD1, SRPK1, MALSU1, MAK16, PATL1, EIF4B, UTP4, RBMX, CNOT2, RPL17-C18orf32, RC3H1, FRG1, EIF4H, RPL17, RPL9, IMP4, CNOT1, NOL11, ZNHIT6, UTP15, RIOX2, ABCE1, EXOSC9, EIF5,…
GO:0050779	RNA destabilization	14	1	0.05	97	0.04906	0.04906	1	1	Any process that decreases the stability of an RNA molecule, making it more vulnerable to degradative processes	0.134917	-0.273907	MEX3D	HNRNPR, RC3H1, PUM1, ZFP36L1, HNRNPD
GO:0060343	trabecula formation	14	1	0.05	98	0.04906	0.04906	1	1	The process of creating a trabecula in an organ. A trabecula is a small, often microscopic, tissue element in the form of a small beam, strut or rod, which generally has a mechanical function. Trabecula are usually but not necessarily, composed of dense collagenous tissue	0.279235	-0.173245	ADAMTS1, WNT10B	GREM1, FKBP1A, EGLN1
GO:0071428	rRNA-containing ribonucleoprotein comple...	14	1	0.05	1051	0.04906	1	1	1	The directed movement of a ribonucleoprotein complex that contains ribosomal RNA from the nucleus to the cytoplasm	0.252146	-0.193872	RPSA, ZNF593, RIOK2	NUP88, SDAD1, ABCE1, LTV1
GO:0006289	nucleotide-excision repair	100	2	0.36	1052	0.04952	1	1	1	A DNA repair process in which a small region of the strand surrounding the damage is removed from the DNA helix as an oligonucleotide. The small gap left in the DNA helix is filled in by the sequential action of DNA polymerase and DNA ligase. Nucleotide excision repair recognizes a wide range of substrates, including damage caused by UV irradiation (pyrimidine dimers and 6-4 photoproducts) and ch…	0.567421	-0.921185	GTF2H3, UBC, RPA3, AQR, RFC1, RPS27A, GTF2H2, HUS1, BRCA2, NEIL2	CETN2, PCNA, UBE2N, COPS2, SUMO1, MNAT1, RFC4, GTF2H1, CCNH, TCEA1, SUMO2, RBBP8, RAD52, COPS8, SLC30A9, POLR2A, OGG1, SLX4

## Sheet: top 80 upreg
GO id	Term	Genes in genome (background)	Genes in top-80 upreg	Expected genes in top-80 upreg	Rank in P.Fisher.elim	P.Fisher	P.Fisher.elim	FDR.Fisher	FDR.Fisher.elim	Description	Avg.LogFC for top-10 upreg	Avg.LogFC for top-10 downreg	Upreg genes (LogFC > 0.4)	Downreg genes (LogFC < -0.4)
GO:0000461	endonucleolytic cleavage to generate mat...	2	2	0.01	1	5.4e-05	5.4e-05	0.54	0.54	Endonucleolytic cleavage at the 3'-end of the SSU-rRNA from an originally tricistronic rRNA transcript that contained the Small Subunit (SSU) rRNA, the 5.8S rRNA, and the Large Subunit (LSU) rRNA in that order from 5' to 3' along the primary transcript, to produce the mature end of the SSU-rRNA	0.710268	0.710268	RPSA, RPS21
GO:0006614	SRP-dependent cotranslational protein ta...	93	5	0.69	2	0.0006	0.0006	1	1	The targeting of proteins to a membrane that occurs during translation and is dependent upon two key components, the signal-recognition particle (SRP) and the SRP receptor. SRP is a cytosolic particle that transiently binds to the endoplasmic reticulum (ER) signal sequence in a nascent protein, to the large ribosomal unit, and to the SRP receptor in the ER membrane	0.614268	-0.820599	RPSA, RPL31, RPS10, RPS21, RPS19, RPL41, RPL21, RPS29, RPS8, RPL10, RPS12, RPL35A, RPL37A, RPS27A, RPS23, RPL34, RPLP2	SRP19, RPL39, RPL15, RPL36A, SRP72, SRP54, SRP14, RPL17-C18orf32, RPL17, RPL9, SRP9
GO:0006613	cotranslational protein targeting to mem...	98	5	0.73	1755	0.00076	1	1	1	The targeting of proteins to a membrane that occurs during translation. The transport of most secretory proteins, particularly those with more than 100 amino acids, into the endoplasmic reticulum lumen occurs in this manner, as does the import of some proteins into mitochondria	0.614268	-0.820599	RPSA, RPL31, RPS10, RPS21, RPS19, RPL41, RPL21, RPS29, RPS8, RPL10, RPS12, RPL35A, RPL37A, RPS27A, RPS23, RPL34, RPLP2	SRP19, RPL39, RPL15, RPL36A, SRP72, SRP54, SRP14, RPL17-C18orf32, RPL17, RPL9, SRP9
GO:0030952	establishment or maintenance of cytoskel...	6	2	0.04	3	0.00079	0.00079	1	1	Any cellular process that results in the specification, formation or maintenance of polarized cytoskeletal structures	0.303431	0.303431	ARHGAP35, LMNA, RICTOR
GO:0045047	protein targeting to ER	102	5	0.75	1756	0.00091	1	1	1	The process of directing proteins towards the endoplasmic reticulum (ER) using signals contained within the protein. One common mechanism uses a 16- to 30-residue signal sequence, typically located at the N-terminus of the protein and containing positively charged amino acids followed by a continuous stretch of hydrophobic residues, which directs the ribosome to the ER membrane and initiates tran…	0.614268	-0.823249	RPSA, RPL31, RPS10, RPS21, RPS19, RPL41, RPL21, RPS29, RPS8, RPL10, RPS12, RPL35A, RPL37A, RPS27A, RPS23, RPL34, RPLP2	SRP19, RPL39, RPL15, RPL36A, SRP72, SRP54, SRP14, SPCS2, RPL17-C18orf32, RPL17, RPL9, SRP9
GO:0042274	ribosomal small subunit biogenesis	59	4	0.44	747	0.00091	0.24214	1	1	A cellular process that results in the biosynthesis of constituent macromolecules, assembly, and arrangement of constituent parts of a small ribosomal subunit; includes transport to the sites of protein synthesis	0.549725	-0.635635	RPSA, RPS10, RPS21, RPS19, RPS8, FCF1, UTP11, RIOK2, RPS27L	MPHOSPH10, UTP3, HEATR1, MRPS9, UTP4, NOL11, LTV1, RRP7BP
GO:0072599	establishment of protein localization to...	105	5	0.78	1757	0.00103	1	1	1	The directed movement of a protein to a specific location in the endoplasmic reticulum	0.614268	-0.830397	RPSA, RPL31, RPS10, RPS21, RPS19, RPL41, RPL21, RPS29, RPS8, RPL10, RPS12, RPL35A, RPL37A, RPS27A, RPS23, RPL34, RAB3GAP2, RPLP2, RAB3GAP1	SRP19, RPL39, RPL15, RPL36A, SRP72, SRP54, SRP14, RAB10, SPCS2, RPL17-C18orf32, RPL17, RPL9, SRP9
GO:0000447	endonucleolytic cleavage in ITS1 to sepa...	8	2	0.06	4	0.00147	0.00147	1	1	Endonucleolytic cleavage between the SSU-rRNA and the 5.8S rRNA of an rRNA molecule originally produced as a tricistronic rRNA transcript that contained the Small SubUnit (SSU) rRNA, the 5.8S rRNA, and the Large SubUnit (LSU) rRNA, in that order, from 5' to 3' along the primary transcript	0.314969	0.314969	RPSA, RPS21, FCF1
GO:0046513	ceramide biosynthetic process	31	3	0.23	5	0.0015	0.0015	1	1	The chemical reactions and pathways resulting in the formation of ceramides, any N-acylated sphingoid	0.572376	-0.356543	CERS2, PRKAA1, CYR61, DEGS1, ST3GAL5, ORMDL3	SPTSSA, AGK, SAMD8
GO:0000462	maturation of SSU-rRNA from tricistronic...	32	3	0.24	537	0.00164	0.15889	1	1	Any process involved in the maturation of a precursor Small SubUnit (SSU) ribosomal RNA (rRNA) molecule into a mature SSU-rRNA molecule from the pre-rRNA molecule originally produced as a tricistronic rRNA transcript that contains the Small Subunit (SSU) rRNA, 5.8S rRNA, and the Large Subunit (LSU) in that order from 5' to 3' along the primary transcript	0.452419	-0.454065	RPSA, RPS21, RPS19, RPS8, FCF1	UTP3, HEATR1, MRPS9
GO:0019080	viral gene expression	174	6	1.29	261	0.00173	0.07391	1	1	A process by which a viral gene is converted into a mature gene product or products (proteins or RNA). This includes viral transcription, processing to produce a mature RNA product, and viral translation	0.636423	-0.935306	RPSA, CDK9, RPL31, RPS10, RPS21, RPS19, RPL41, RPL21, RPS29, RPS8, RPL10, RPS12, RPL35A, TFAP4, PTBP1, RPL37A, TRIM32, RPS27A, JUN, RPS23, RPL34, POM121C, EIF2AK4, RPLP2, RAE1, CTDP1	RPL39, GTF2B, RPL15, NUP35, TRIM13, NUPL2, NUP54, GTF2F2, NUP37, NUP205, RPL36A, NUP88, SSB, ZNF639, RPL17-C18orf32, RPL17, RPL9, HMGA2, POLR2A, TRIM21, NUP43, CCNT1, SP1
GO:0045739	positive regulation of DNA repair	33	3	0.24	6	0.0018	0.0018	1	1	Any process that activates or increases the frequency, rate or extent of DNA repair	0.356221	-0.642664	BRCA1, BABAM1, FOXM1, FAM168A	PCNA, UBE2N, ABRAXAS1, EGFR, EYA4, SETMAR, SLF1, BRCC3
GO:0000184	nuclear-transcribed mRNA catabolic proce...	119	5	0.88	7	0.00181	0.00181	1	1	The nonsense-mediated decay pathway for nuclear-transcribed mRNAs degrades mRNAs in which an amino-acid codon has changed to a nonsense codon; this prevents the translation of such mRNAs into truncated, and potentially harmful, proteins	0.614268	-0.94935	RPSA, RPL31, RPS10, RPS21, RPS19, RPL41, RPL21, RPS29, RPS8, RPL10, RPS12, RPL35A, RPL37A, RPS27A, RPS23, RPL34, RPLP2	RPL39, GSPT1, EIF3E, GSPT2, RPL15, UPF2, PPP2R2A, RPL36A, PNRC2, RPL17-C18orf32, RPL17, RPL9, PABPC1, SMG8
GO:0010629	negative regulation of gene expression	1086	17	8.04	126	0.00181	0.03072	1	1	Any process that decreases the frequency, rate or extent of gene expression. Gene expression is the process in which a gene's coding sequence is converted into a mature gene product or products (proteins or RNA). This includes the production of an RNA transcript as well as any processing to produce a mature RNA product or an mRNA (for protein-coding genes) and the translation of that mRNA into pr…	1.07857	-1.5208	LRP8, KAT6A, SKIL, KLF12, H3F3A, C1D, EXOSC6, CNPY2, MEX3D, ZBTB18, TSNAX, PNPT1, ARHGAP35, CREBZF, TAF9B, KLF16, RPSA, AHR, CDK9, HMG20A, HES6, NDFIP2, UBC, BAHD1, BRCA1, GFI1, RPL31, TBX2, GON4L, RTF1, IGFBP5, EGR1, SMAD4, TNRC6B, PPM1F, RPS10, DDX6, ATOH8, RPS21, MECP2, CBX6, MDM4, SUV39H2, KAT6B, TSC22D3, LGR4, SUFU, THRA, SCMH1, SUPT6H, TNRC18, JARID2, FNIP1, SBNO2, RPS19, LDLR, ZHX2, RPL41,…	FAM220A, ZNF675, HAT1, THRB, UBE2D3, RPL39, EPC1, GSPT1, RNASEH2B, RNF2, EIF3E, PDCD10, TENT2, CREB1, SIN3A, DIS3, PAIP1, DYRK1A, ADNP, ZMYND11, ZNF224, GSPT2, RPL15, ZBTB1, BAZ2A, IRF2, TMF1, NFIL3, KDM5A, STAT1, EIF2AK2, AKIRIN2, ZNF567, BTAF1, EED, COPS2, TMEM59, PTBP3, GLIS3, IKZF4, NCK1, SMURF2, UBA3, SUMO1, NUP35, RBAK, ZBTB33, TRIM13, NUPL2, IREB2, PUM2, AEBP2, NUP54, PRNP, TSN, BASP1, NR2…
GO:0006413	translational initiation	177	6	1.31	8	0.00189	0.00189	1	1	The process preceding formation of the peptide bond between the first two amino acids of a protein. This includes the formation of a complex of the ribosome, mRNA, and an initiation complex that contains the first aminoacyl-tRNA	0.635395	-1.10929	RPSA, EIF2B1, RPL31, RPS10, RPS21, RPS19, RPL41, RPL21, DNAJC3, RPS29, RPS8, RPL10, RPS12, RPL35A, EIF1AX, PTBP1, RPL37A, RPS27A, RPS23, RPL34, EIF2AK4, AGO2, EIF2S2, RPLP2, EIF4G3, YTHDF1	RPL39, EIF3M, EIF3E, PAIP1, RPL15, EIF2AK2, NCK1, EIF2A, PPP1R15B, NPM1, EIF1B, EIF3J, EIF3H, MTIF3, RPL36A, ALKBH1, FMR1, YAE1D1, SSB, EIF4B, EIF4E, C8orf88, RPS6KB1, RPL17-C18orf32, EIF4H, RPL17, RPL9, GLE1, MTFMT, ABCE1, EIF5, EIF4A2, PABPC1, DHX29, EIF2B2
GO:0070972	protein localization to endoplasmic reti...	121	5	0.9	1758	0.00195	1	1	1	A process in which a protein is transported to, or maintained in, a location within the endoplasmic reticulum	0.614268	-0.924961	RPSA, RPL31, RPS10, RPS21, RPS19, RPL41, RPL21, RPS29, RPS8, RPL10, RPS12, RPL35A, RPL37A, RPS27A, UBAC2, RPS23, RPL34, RAB3GAP2, HSPA5, RPLP2, KDELR2, RAB3GAP1	SRP19, RPL39, RPL15, KDELR3, RTN4, VAPA, RPL36A, SRP72, SRP54, SRP14, RAB10, SPCS2, RPL17-C18orf32, RPL17, RPL9, SRP9
GO:0031125	rRNA 3'-end processing	10	2	0.07	1759	0.00233	1	1	1	Any process involved in forming the mature 3' end of an rRNA molecule	0.180209	0.180209	EXOSC6, RPSA, RPS21	EXOSC3
GO:0042775	mitochondrial ATP synthesis coupled elec...	76	4	0.56	260	0.00235	0.07289	1	1	The transfer of electrons through a series of electron donors and acceptors, generating energy that is ultimately used for synthesis of ATP, as it occurs in the mitochondrial inner membrane or chloroplast thylakoid membrane	0.616662	-0.587	UQCRHL, NDUFA11, NDUFA2, NDUFB2, MECP2, CDK1, NDUFB6, NDUFA9, UQCRQ, COX10, TAZ	UQCRB, NDUFS1, AP003108.2, PMPCB, NDUFA12, NDUFB1, NDUFA6
GO:0042773	ATP synthesis coupled electron transport	77	4	0.57	263	0.00246	0.07494	1	1	The transfer of electrons through a series of electron donors and acceptors, generating energy that is ultimately used for synthesis of ATP	0.616662	-0.587	UQCRHL, NDUFA11, NDUFA2, NDUFB2, MECP2, CDK1, NDUFB6, NDUFA9, UQCRQ, COX10, TAZ	UQCRB, NDUFS1, AP003108.2, PMPCB, NDUFA12, NDUFB1, NDUFA6
GO:0044033	multi-organism metabolic process	192	6	1.42	596	0.00285	0.18343	1	1	A metabolic process - chemical reactions and pathways, including anabolism and catabolism, by which living organisms transform chemical substances - which involves more than one organism	0.639355	-0.977978	RPSA, CDK9, RPL31, RPS10, RPS21, RPS19, RPL41, TOP2A, RPL21, RPS29, RPS8, RPL10, RPS12, RPL35A, TFAP4, MAP2K3, PTBP1, RPL37A, TRIM32, RPS27A, JUN, RPS23, RPL34, POM121C, EIF2AK4, RPLP2, RAE1, MAP2K1, CTDP1	RPL39, MAP2K4, GTF2B, RPL15, NUP35, TRIM13, NUPL2, NUP54, GTF2F2, NUP37, ATG5, NUP205, RPL36A, NUP88, FMR1, SSB, ZNF639, RPL17-C18orf32, RPL17, RPL9, HMGA2, POLR2A, TRIM21, NUP43, CCNT1, SP1
GO:0008283	cell proliferation	1034	16	7.65	700	0.00287	0.22504	1	1	The multiplication or reproduction of cells, resulting in the expansion of a cell population	1.13212	-1.33822	ADAMTS1, AL928654.3, FOSL2, SKP2, FGFR3, CERS2, KIF14, H3F3A, TAX1BP3, SOD2, TOB2, TIAM1, BIRC6, PRKAA1, CYR61, AHR, CDK9, FIGNL1, RPA3, CCAR1, BRCA1, TBX2, TAF8, IGFBP5, EGR1, SMAD4, KRAS, BIN1, ATOH8, POLR3G, GINS1, PLXNB1, MECP2, RC3H2, MDM4, CDCA7L, TENM4, PRG4, COPS9, KISS1, CDH2, LGR4, PDXK, JARID2, PBRM1, RNF10, TGFBR1, GATA2, FOXO3, XIAP, FOXM1, PLCL2, CDK1, HILPDA, ATAD5, CASK, SLC35F6, …	ITGB1, MTBP, RNASEH2B, NRK, NOV, PDCD10, CREB1, MARCH7, HPSE, ABCC4, ZMYND11, GPAM, GNG5, BUB1, PCNA, LIPA, SYF2, IRF2, LYN, RASGRF1, STAT1, EIF2AK2, AKIRIN2, NAP1L1, COPS2, KRIT1, RTN4, IFT74, NCK1, USPL1, NPM1, NAMPT, EEF1E1, PRNP, PDGFRA, TOPORS, SBDS, PSMG1, AC068234.1, SDCBP, PAK1IP1, CIP2A, STRAP, PPP2R5C, C18orf54, MNAT1, BLZF1, EGFR, NKX3-1, TBCK, BTN3A1, MAP3K20, IQGAP3, C3orf58, SH3BP4,…
GO:0000478	endonucleolytic cleavage involved in rRN...	12	2	0.09	1760	0.00339	1	1	1	Any endonucleolytic cleavage involved in the conversion of a primary ribosomal RNA (rRNA) transcript into a mature rRNA molecule. Some endonucleolytic cleavages produce the mature end, while others are a step in the process of generating the mature end from the pre-rRNA	0.295107	0.108062	RPSA, RPS21, FCF1
GO:0000479	endonucleolytic cleavage of tricistronic...	12	2	0.09	1761	0.00339	1	1	1	Endonucleolytic cleavage of a pre-rRNA molecule originally produced as a tricistronic rRNA transcript that contains the Small SubUnit (SSU) rRNA, the 5.8S rRNA, and the Large SubUnit (LSU) rRNA, in that order, from 5' to 3' along the primary transcript. Primary ribosomal RNA transcripts with three genes, in this order, are produced in the nuclei of many eukaryotic species, including S. cerevisiae	0.295107	0.108062	RPSA, RPS21, FCF1
GO:1901796	regulation of signal transduction by p53...	138	5	1.02	9	0.00345	0.00345	1	1	Any process that modulates the frequency, rate or extent of signal transduction by p53 class mediator	0.789282	-0.869731	KAT6A, TAF9B, PRKAA1, TAF4, UBC, RPA3, BRCA1, RMI1, DNA2, MDM4, MUC1, CHEK2, HIPK1, RPS27A, HUS1	TAF5, DYRK1A, CSNK2A2, TAF9, EEF1E1, TOPBP1, PRKAB2, MEAF6, RFC4, DDX5, RBBP8, RBBP4, HDAC2, RRM2B, TRIAP1, NUAK1, EXO1, PTTG1IP
GO:0000028	ribosomal small subunit assembly	13	2	0.1	10	0.00399	0.00399	1	1	The aggregation, arrangement and bonding together of constituent RNAs and proteins to form the small ribosomal subunit	0.352596	0.0788261	RPSA, RPS10, RPS19, RPS27L	RRP7BP
GO:0006301	postreplication repair	44	3	0.33	538	0.00412	0.15909	1	1	The conversion of DNA-damage induced single-stranded gaps into large molecular weight DNA after replication. Includes pathways that remove replication-blocking lesions in conjunction with DNA replication	0.49113	-0.867675	UBC, RPA3, BRCA1, RFC1, RPS27A	POLE2, ZBTB1, PCNA, UBE2N, MSH2, RFC4, UBE2A, DTL, PRIMPOL, HLTF
GO:0042127	regulation of cell proliferation	781	13	5.78	34	0.00413	0.00964	1	1	Any process that modulates the frequency, rate or extent of cell proliferation	1.09055	-1.33822	ADAMTS1, FOSL2, SKP2, FGFR3, CERS2, KIF14, TAX1BP3, SOD2, TOB2, TIAM1, BIRC6, PRKAA1, CYR61, AHR, RPA3, CCAR1, BRCA1, TBX2, IGFBP5, EGR1, SMAD4, KRAS, ATOH8, PLXNB1, MECP2, MDM4, CDCA7L, COPS9, KISS1, CDH2, JARID2, PBRM1, RNF10, TGFBR1, GATA2, FOXO3, XIAP, FOXM1, CDK1, HILPDA, ATAD5, CASK, SLC35F6, FLCN, ZNF703, MAGED1, S1PR2, ROMO1, FAM129B, PTPRJ, LMNA, TFAP4, IFT122, NOTCH1, S100A13, HIF1A, TS…	ITGB1, MTBP, RNASEH2B, NRK, NOV, PDCD10, CREB1, MARCH7, HPSE, ABCC4, GPAM, GNG5, SYF2, LYN, STAT1, EIF2AK2, AKIRIN2, NAP1L1, KRIT1, RTN4, IFT74, NCK1, NPM1, NAMPT, EEF1E1, PRNP, PDGFRA, TOPORS, AC068234.1, SDCBP, CIP2A, STRAP, PPP2R5C, C18orf54, MNAT1, EGFR, NKX3-1, IQGAP3, SH3BP4, UBE2A, TFAP2A, LGALS3, AGTR1, PLPP1, GREM1, RBBP9, CTF1, TTK, ISL1, HIST1H2AC, BCHE, KIFAP3, PLAC8, AREG, JAK1, ADAM…
GO:0022900	electron transport chain	89	4	0.66	357	0.00416	0.10091	1	1	A process in which a series of electron carriers operate together to transfer electrons from donors to any of several different terminal electron acceptors to generate a transmembrane electrochemical gradient	0.654006	-0.646803	D2HGDH, UQCRHL, NDUFA11, NDUFA2, NDUFB2, MECP2, CDK1, NDUFB6, NDUFA9, UQCRQ, COX10, TAZ	UQCRB, NDUFS1, ALDH5A1, AP003108.2, PMPCB, NDUFA12, ETFDH, NDUFB1, SLC25A13, NDUFA6
GO:0022904	respiratory electron transport chain	89	4	0.66	358	0.00416	0.10091	1	1	A process in which a series of electron carriers operate together to transfer electrons from donors such as NADH and FADH2 to any of several different terminal electron acceptors to generate a transmembrane electrochemical gradient	0.654006	-0.646803	D2HGDH, UQCRHL, NDUFA11, NDUFA2, NDUFB2, MECP2, CDK1, NDUFB6, NDUFA9, UQCRQ, COX10, TAZ	UQCRB, NDUFS1, ALDH5A1, AP003108.2, PMPCB, NDUFA12, ETFDH, NDUFB1, SLC25A13, NDUFA6
GO:0072331	signal transduction by p53 class mediato...	209	6	1.55	1762	0.00433	1	1	1	An intracellular signaling process that is induced by the cell cycle regulator phosphoprotein p53 or an equivalent protein	0.798067	-0.944549	KAT6A, TAF9B, PRKAA1, TAF4, UBC, RPA3, BRCA1, PIDD1, RMI1, DNA2, MDM4, FOXO3, FOXM1, CDK1, TFAP4, MUC1, CHEK2, RBL2, HIPK1, RPS27A, ING4, RPS27L, HUS1, BRCA2	TAF5, DYRK1A, PCNA, CSNK2A2, MSH2, NPM1, TAF9, EEF1E1, TOPORS, TOPBP1, PRKAB2, MEAF6, RFC4, DDX5, RBBP8, KRCC1, CASP2, RBBP4, CNOT2, HDAC2, RRM2B, CNOT1, TRIAP1, NUAK1, EXO1, PTTG1IP
GO:0006119	oxidative phosphorylation	90	4	0.67	362	0.00433	0.10317	1	1	The phosphorylation of ADP to ATP that accompanies the oxidation of a metabolite through the operation of the respiratory chain. Oxidation of compounds establishes a proton gradient across the membrane, providing the energy for ATP synthesis	0.621902	-0.680391	UQCRHL, NDUFA11, NDUFA2, NDUFB2, MECP2, CDK1, UQCC2, NDUFB6, NDUFA9, UQCRQ, COX10, TAZ	UQCRB, MSH2, NDUFS1, AP003108.2, ATP5F1C, PMPCB, NDUFA12, NDUFB1, NDUFA6
GO:0065004	protein-DNA complex assembly	146	5	1.08	11	0.00438	0.00438	1	1	The aggregation, arrangement and bonding together of proteins and DNA molecules to form a protein-DNA complex	0.867937	-1.12669	KAT6A, IPO4, H3F3A, GTF2H3, TAF9B, TAF4, UBC, RPA3, HIST1H2BJ, KNL1, KAT6B, THRA, MIS18BP1, HJURP, H1FX, TSPYL4, RPS27A, GTF2H2, WNT10B, MCM2, SPTY2D1	CETN2, HAT1, CREB1, GTF2B, ITGB3BP, CENPQ, NAP1L1, NPM1, TAF9, PSMC6, CENPI, MNAT1, GTF2H1, CCNH, SENP6, SET, GMNN, HIST2H2BE, RAD52, RBBP4, HIST1H2BC, CENPK, CENPU
GO:0030490	maturation of SSU-rRNA	45	3	0.33	722	0.00439	0.2343	1	1	Any process involved in the maturation of a precursor Small SubUnit (SSU) ribosomal RNA (rRNA) molecule into a mature SSU-rRNA molecule	0.478138	-0.604996	RPSA, RPS21, RPS19, RPS8, FCF1, RIOK2	MPHOSPH10, UTP3, HEATR1, MRPS9, UTP4, NOL11
GO:0006122	mitochondrial electron transport, ubiqui...	14	2	0.1	12	0.00463	0.00463	1	1	The transfer of electrons from ubiquinol to cytochrome c that occurs during oxidative phosphorylation, mediated by the multisubunit enzyme known as complex III	0.276963	-0.185124	UQCRHL, MECP2, UQCRQ	UQCRB, PMPCB
GO:0006978	DNA damage response, signal transduction...	14	2	0.1	13	0.00463	0.00463	1	1	A cascade of processes induced by the cell cycle regulator phosphoprotein p53, or an equivalent protein, resulting in the induction of the transcription of p21 (also known as WAF1, CIP1 and SDI1) or any equivalent protein, in response to the detection of DNA damage	0.413794	0.144317	BRCA1, FOXM1, TFAP4, MUC1, CHEK2, ING4, BRCA2
GO:0006665	sphingolipid metabolic process	92	4	0.68	959	0.00468	0.35259	1	1	The chemical reactions and pathways involving sphingolipids, any of a class of lipids containing the long-chain amine diol sphingosine or a closely related base (a sphingoid)	0.797285	-0.782661	SPNS2, CERS2, PRKAA1, CYR61, ARSI, DEGS1, ST3GAL5, SPHK1, CSNK1G2, ORMDL3, ALDH3A2, A4GALT	PPT1, PRKD3, ARSK, ALDH5A1, VAPA, PLPP1, SPTSSA, SERINC3, CTSA, CERKL, HACD2, AGK, SAMD8
GO:0006672	ceramide metabolic process	48	3	0.36	1763	0.00527	1	1	1	The chemical reactions and pathways involving ceramides, any N-acylated sphingoid	0.583062	-0.411171	CERS2, PRKAA1, CYR61, DEGS1, ST3GAL5, ORMDL3	ALDH5A1, SPTSSA, AGK, SAMD8
GO:0042276	error-prone translesion synthesis	15	2	0.11	14	0.00532	0.00532	1	1	The conversion of DNA-damage induced single-stranded gaps into large molecular weight DNA after replication by using a specialized DNA polymerase or replication complex to insert a defined nucleotide across the lesion. This process does not remove the replication-blocking lesions and causes an increase in the endogenous mutation level. For example, in E. coli, a low fidelity DNA polymerase, pol V…	0.295254	-0.376784	UBC, RPA3, RFC1, RPS27A	POLE2, PCNA, RFC4
GO:0042772	DNA damage response, signal transduction...	15	2	0.11	1764	0.00532	1	1	1	A cascade of processes initiated in response to the detection of DNA damage, and resulting in the induction of transcription	0.431183	0.109696	BRCA1, FOXM1, TFAP4, MUC1, CHEK2, ING4, BRCA2
GO:0006612	protein targeting to membrane	153	5	1.13	1765	0.00534	1	1	1	The process of directing proteins towards a membrane, usually using signals contained within the protein	0.629271	-0.94865	RPSA, RPL31, RAB8B, RPS10, RPS21, RPS19, RPL41, RPL21, RPS29, RPS8, RPL10, RPS12, RPL35A, RPL37A, MIEF1, RPS27A, RPS23, RPL34, MIEF2, PEX5, ATG4B, RPLP2, PACS2	SRP19, RPL39, RPL15, PEX3, NUP54, PRNP, SDCBP, GOLGA7, MFF, RPL36A, SRP72, SRP54, SRP14, RPL17-C18orf32, RPL17, RPL9, SRP9, ATG4A, MTCL1
GO:0007292	female gamete generation	50	3	0.37	15	0.00591	0.00591	1	1	Generation of the female gamete; specialised haploid cells produced by meiosis and along with a male gamete takes part in sexual reproduction	0.669588	-0.431874	ADAMTS1, H3F3A, TOB2, REC8, FOXO3, ZGLP1, BRCA2	FMN2, ASPM, FOSL1, SRC
GO:0000466	maturation of 5.8S rRNA from tricistroni...	16	2	0.12	1766	0.00605	1	1	1	Any process involved in the maturation of an rRNA molecule originally produced as part of a tricistronic rRNA transcript that contained the Small SubUnit (SSU) rRNA, the 5.8S rRNA, and the Large SubUnit (LSU) rRNA, in that order, from 5' to 3' along the primary transcript	0.324221	-0.0784679	RPSA, RPS21, FCF1	EXOSC3
GO:0051403	stress-activated MAPK cascade	160	5	1.18	16	0.00644	0.00644	1	1	A series of molecular signals in which a stress-activated MAP kinase cascade relays one or more of the signals; MAP kinase cascades involve at least three protein kinase activities and culminate in the phosphorylation and activation of a MAP kinase	0.71681	-1.14181	SH3RF1, CARD9, TIAM1, CHUK, UBC, RASSF2, DUSP10, FOXM1, CRKL, HMGCR, RPS27A, EZR, IRAK2, XDH, IKBKG, EDN1, RAPGEF1, HRAS, MAP2K1	ZNF675, DVL3, NRK, PDCD10, MAP2K4, ZMYND11, EIF2AK2, UBE2N, SDCBP, HSPH1, TAB2, ARL6IP5, EGFR, AIDA, HIPK3, MAP3K20, MAPK8, DNAJA1, GPS2, HACD3, ERN1, STK3, TAOK3, PHLPP1, RIPK2, ZFP36L1, NFKB1, WNT5A, MAP3K9
GO:0070987	error-free translesion synthesis	17	2	0.13	17	0.00682	0.00682	1	1	The conversion of DNA-damage induced single-stranded gaps into large molecular weight DNA after replication by using a specialized DNA polymerase or replication complex to insert a defined nucleotide across the lesion. This process does not remove the replication-blocking lesions but does not causes an increase in the endogenous mutation level. For S. cerevisiae, RAD30 encodes DNA polymerase eta,…	0.380133	-0.180892	UBC, RPA3, RFC1, RPS27A	PCNA, RFC4
GO:0030148	sphingolipid biosynthetic process	53	3	0.39	1767	0.00695	1	1	1	The chemical reactions and pathways resulting in the formation of sphingolipids, any of a class of lipids containing the long-chain amine diol sphingosine or a closely related base (a sphingoid)	0.622231	-0.564092	CERS2, PRKAA1, CYR61, DEGS1, ST3GAL5, SPHK1, CSNK1G2, ORMDL3, ALDH3A2, A4GALT	PRKD3, VAPA, PLPP1, SPTSSA, CERKL, HACD2, AGK, SAMD8
GO:0019083	viral transcription	163	5	1.21	18	0.00696	0.00696	1	1	The process by which a viral genome, or part of a viral genome, is transcribed within the host cell	0.636423	-0.935306	RPSA, CDK9, RPL31, RPS10, RPS21, RPS19, RPL41, RPL21, RPS29, RPS8, RPL10, RPS12, RPL35A, TFAP4, RPL37A, TRIM32, RPS27A, JUN, RPS23, RPL34, POM121C, RPLP2, RAE1, CTDP1	RPL39, GTF2B, RPL15, NUP35, TRIM13, NUPL2, NUP54, GTF2F2, NUP37, NUP205, RPL36A, NUP88, ZNF639, RPL17-C18orf32, RPL17, RPL9, HMGA2, POLR2A, TRIM21, NUP43, CCNT1, SP1
GO:0051253	negative regulation of RNA metabolic pro...	738	12	5.46	19	0.00714	0.00714	1	1	Any process that stops, prevents, or reduces the frequency, rate or extent of the chemical reactions and pathways involving RNA	1.07575	-1.43948	LRP8, KAT6A, SKIL, KLF12, NPAT, H3F3A, C1D, TOB2, ZBTB18, CDYL, ARHGAP35, CREBZF, TAF9B, KLF16, AHR, CDK9, HMG20A, HES6, UBC, BAHD1, CCAR1, BRCA1, GFI1, TBX2, GON4L, RTF1, EGR1, SMAD4, PPM1F, ATOH8, MECP2, CBX6, MDM4, SUV39H2, KAT6B, TSC22D3, LGR4, SUFU, THRA, SCMH1, SUPT6H, TNRC18, JARID2, FNIP1, SBNO2, ZHX2, MPHOSPH8, NKX3-2, NR1D2, GATA2, FOXO3, FOXM1, FLCN, RPL10, ZNF703, MAGED1, ZFHX3, POU2F…	FAM220A, ZNF675, HAT1, THRB, UBE2D3, EPC1, RNF2, CREB1, SIN3A, DYRK1A, ZMYND11, ZNF224, ZBTB1, BAZ2A, IRF2, NFIL3, KDM5A, STAT1, AKIRIN2, ZNF567, BTAF1, EED, COPS2, PTBP3, GLIS3, IKZF4, NCK1, SMURF2, UBA3, SUMO1, RBAK, ZBTB33, TRIM13, ZNF85, AEBP2, BASP1, NR2C1, WWP1, STRAP, CHCHD3, NKX3-1, NFE2L3, DR1, DDX5, ZBTB38, MTERF3, ZNF189, CGGBP1, TFAP2A, ZNF93, BPTF, NR2F1, GREM1, SET, ISL1, USP47, HIS…
GO:0031098	stress-activated protein kinase signalin...	164	5	1.21	1768	0.00714	1	1	1	A series of molecular signals in which a stress-activated protein kinase (SAPK) cascade relays one or more of the signals	0.71681	-1.16627	SH3RF1, CARD9, TIAM1, CHUK, UBC, RASSF2, DUSP10, FOXM1, CRKL, HMGCR, RPS27A, EZR, IRAK2, XDH, IKBKG, EDN1, RAPGEF1, HRAS, MAP2K1	ZNF675, DVL3, NRK, PDCD10, MAP2K4, ZMYND11, LYN, EIF2AK2, UBE2N, SDCBP, HSPH1, TAB2, ARL6IP5, EGFR, AIDA, HIPK3, MAP3K20, MAPK8, DNAJA1, GPS2, HACD3, KAT7, ERN1, STK3, TAOK3, PHLPP1, RIPK2, ZFP36L1, NFKB1, WNT5A, MAP3K9
GO:0010605	negative regulation of macromolecule met...	1560	20	11.54	1621	0.00715	0.81785	1	1	Any process that decreases the frequency, rate or extent of the chemical reactions and pathways involving macromolecules, any molecule of high relative molecular mass, the structure of which essentially comprises the multiple repetition of units derived, actually or conceptually, from molecules of low relative molecular mass	1.10152	-1.57241	LRP8, KAT6A, SKIL, KLF12, PSMA6, NPAT, H3F3A, C1D, EXOSC6, SH3RF1, CNPY2, MEX3D, SOCS7, TOB2, ZBTB18, CDYL, TSNAX, PNPT1, ARHGAP35, BIRC6, CREBZF, ANAPC7, TAF9B, WFDC3, KLF16, RPSA, AHR, PRKCE, CDK9, HMG20A, HES6, SOCS4, NDFIP2, UBC, BAHD1, CCAR1, BRCA1, GFI1, RPL31, TBX2, GON4L, RTF1, RASSF2, IGFBP5, EGR1, SMAD4, TNRC6B, PPM1F, PRKAR1B, PTPN3, RPS10, DDX6, ATOH8, RPS21, MECP2, CBX6, PARPBP, MDM4…	FAM220A, PSMD5, ZNF675, HAT1, THRB, UBE2D3, TERF2IP, RPL39, EPC1, GSPT1, RNASEH2B, RNF2, UCHL5, PSMD12, USP25, EIF3E, PDCD10, TENT2, AZIN1, CREB1, SIN3A, DIS3, PAIP1, ITM2B, DYRK1A, ADNP, ZMYND11, ZNF224, GSPT2, RPL15, ZBTB1, BAZ2A, IRF2, FMN2, LYN, TMF1, NFIL3, KDM5A, STAT1, EIF2AK2, AKIRIN2, USP14, ZNF567, PSMA1, ANAPC10, BTAF1, EED, COPS2, TMEM59, PTBP3, GLIS3, MSH2, IKZF4, NCK1, FAM129A, PPP1…
GO:0043966	histone H3 acetylation	54	3	0.4	20	0.00733	0.00733	1	1	The modification of histone H3 by the addition of an acetyl group	0.698542	-0.772136	KAT6A, TAF9B, BRCA1, SMAD4, ELP3, JADE2, KAT6B, BRD1, WDR5, ING4, BRCA2, ZNF451	SUPT3H, SIN3A, TAF9, MEAF6, DR1, ELP4, MBIP, KAT7, LDB1, KAT2B
GO:0002041	intussusceptive angiogenesis	1	1	0.01	21	0.0074	0.0074	1	1	The formation of new blood vessels as a result of the insertion and extension of lumenal tissue pillars	0.782856	0.782856	CYR61
GO:0006253	dCTP catabolic process	1	1	0.01	22	0.0074	0.0074	1	1	The chemical reactions and pathways resulting in the breakdown of dCTP, deoxycytidine triphosphate	0.671166	0.671166	DCTPP1
GO:0009149	pyrimidine nucleoside triphosphate catab...	1	1	0.01	1769	0.0074	1	1	1	The chemical reactions and pathways resulting in the breakdown of pyrimidine nucleoside triphosphate, a compound consisting of a pyrimidine base linked to a ribose or deoxyribose sugar esterified with triphosphate on the sugar	0.671166	0.671166	DCTPP1
GO:0009213	pyrimidine deoxyribonucleoside triphosph...	1	1	0.01	1770	0.0074	1	1	1	The chemical reactions and pathways resulting in the breakdown of pyrimidine deoxyribonucleoside triphosphate, a compound consisting of a pyrimidine base linked to a deoxyribose sugar esterified with triphosphate on the sugar	0.671166	0.671166	DCTPP1
GO:0014011	Schwann cell proliferation involved in a...	1	1	0.01	1771	0.0074	1	1	1	The multiplication or reproduction of Schwann cells by cell division, resulting in the expansion of their population in response to an axonal lesion. The newly generated Schwann cells support subsequent axon regeneration in the peripheral nervous system	1.10585	1.10585	CERS2
GO:0014809	regulation of skeletal muscle contractio...	1	1	0.01	1772	0.0074	1	1	1	Any process that modulates the frequency, rate or extent of skeletal muscle contraction via the regulation of the release of sequestered calcium ion by sarcoplasmic reticulum into cytosol. The sarcoplasmic reticulum is the endoplasmic reticulum of striated muscle, specialised for the sequestration of calcium ions that are released upon receipt of a signal relayed by the T tubules from the neuromu…	0.431023	0.431023	GSTO1
GO:0014810	positive regulation of skeletal muscle c...	1	1	0.01	23	0.0074	0.0074	1	1	Any process that activates, maintains or increases the frequency, rate or extent of skeletal muscle contraction via the regulation of the release of sequestered calcium ion by sarcoplasmic reticulum into cytosol. The sarcoplasmic reticulum is the endoplasmic reticulum of striated muscle, specialised for the sequestration of calcium ions that are released upon receipt of a signal relayed by the T …	0.431023	0.431023	GSTO1
GO:0021541	ammon gyrus development	1	1	0.01	24	0.0074	0.0074	1	1	The process whose specific outcome is the progression of the ammon gyrus over time, from its formation to the mature structure. The ammon gyrus, often subdivided into the CA1 and CA3 regions, is one of the two interlocking gyri of the hippocampus that is rich in large pyramidal neurons	1.44032	1.44032	LRP8
GO:0030309	poly-N-acetyllactosamine metabolic proce...	1	1	0.01	1773	0.0074	1	1	1	The chemical reactions and pathways involving poly-N-acetyllactosamine, a carbohydrate composed of N-acetyllactosamine repeats (Gal-beta-1,4-GlcNAc-beta-1,3)n	0.482527	0.482527	B4GAT1
GO:0030311	poly-N-acetyllactosamine biosynthetic pr...	1	1	0.01	25	0.0074	0.0074	1	1	The chemical reactions and pathways resulting in the formation of poly-N-acetyllactosamine, a carbohydrate composed of N-acetyllactosamine repeats (Gal-beta-1,4-GlcNAc-beta-1,3)n	0.482527	0.482527	B4GAT1
GO:0035105	sterol regulatory element binding protei...	1	1	0.01	26	0.0074	0.0074	1	1	The transfer of a sterol regulatory element binding protein (SREBP) into the nucleus, across the nuclear membrane, in response to altered levels of one or more lipids. SREBPs are transcription factors that bind sterol regulatory elements (SREs), DNA motifs found in the promoters of target genes	0.522082	0.522082	LMNA
GO:0046065	dCTP metabolic process	1	1	0.01	1774	0.0074	1	1	1	The chemical reactions and pathways involving dCTP, deoxycytidine triphosphate	0.671166	0.671166	DCTPP1
GO:0060112	generation of ovulation cycle rhythm	1	1	0.01	27	0.0074	0.0074	1	1	The process which controls the timing of the type of sexual cycle seen in female mammals	0.6235	0.6235	KISS1
GO:0070510	regulation of histone H4-K20 methylation	1	1	0.01	1775	0.0074	1	1	1	Any process that modulates the frequency, rate or extent of the covalent addition of a methyl group to the lysine at position 20 of histone H4	0.728544	0.728544	BRCA1
GO:0070512	positive regulation of histone H4-K20 me...	1	1	0.01	28	0.0074	0.0074	1	1	Any process that activates or increases the frequency, rate or extent of the covalent addition of a methyl group to the lysine at position 20 of histone H4	0.728544	0.728544	BRCA1
GO:1900148	negative regulation of Schwann cell migr...	1	1	0.01	29	0.0074	0.0074	1	1	Any process that stops, prevents or reduces the frequency, rate or extent of Schwann cell migration	1.10585	1.10585	CERS2
GO:1902296	DNA strand elongation involved in cell c...	1	1	0.01	1776	0.0074	1	1	1	Any DNA strand elongation that is involved in cell cycle DNA replication	0.649254	0.649254	GINS1
GO:1902319	DNA strand elongation involved in nuclea...	1	1	0.01	1777	0.0074	1	1	1	Any DNA strand elongation that is involved in nuclear cell cycle DNA replication	0.649254	0.649254	GINS1
GO:1902983	DNA strand elongation involved in mitoti...	1	1	0.01	30	0.0074	0.0074	1	1	Any DNA strand elongation involved in mitotic cell cycle DNA replication	0.649254	0.649254	GINS1
GO:1905044	regulation of Schwann cell proliferation...	1	1	0.01	1778	0.0074	1	1	1		1.10585	1.10585	CERS2
GO:1905045	negative regulation of Schwann cell prol...	1	1	0.01	31	0.0074	0.0074	1	1		1.10585	1.10585	CERS2
GO:2000620	positive regulation of histone H4-K16 ac...	1	1	0.01	32	0.0074	0.0074	1	1	Any process that activates or increases the frequency, rate or extent of histone H4-K16 acetylation	0.728544	0.728544	BRCA1
GO:0009892	negative regulation of metabolic process	1677	21	12.41	1577	0.00747	0.75299	1	1	Any process that stops, prevents, or reduces the frequency, rate or extent of the chemical reactions and pathways within a cell or an organism	1.10152	-1.58045	LRP8, KAT6A, SKIL, KLF12, PSMA6, NPAT, H3F3A, C1D, EXOSC6, SH3RF1, CNPY2, MEX3D, SOCS7, TOB2, ZBTB18, CDYL, SH3RF2, TSNAX, PNPT1, ARHGAP35, BIRC6, CREBZF, ANAPC7, TAF9B, WFDC3, PRKAA1, KLF16, ATXN7, RPSA, AHR, PRKCE, CDK9, HMG20A, HES6, SOCS4, NDFIP2, UBC, BAHD1, CCAR1, BRCA1, GFI1, RPL31, TBX2, GON4L, RTF1, RASSF2, IGFBP5, EGR1, SMAD4, TNRC6B, PPM1F, PRKAR1B, PTPN3, KNL1, RPS10, DDX6, ATOH8, RPS…	FAM220A, PSMD5, ZNF675, HAT1, THRB, UBE2D3, TERF2IP, RPL39, ARRDC3, EPC1, GSPT1, RNASEH2B, RNF2, UCHL5, PSMD12, USP25, EIF3E, PDCD10, TENT2, AZIN1, CREB1, SIN3A, DIS3, MPHOSPH10, PAIP1, ITM2B, DYRK1A, ADNP, ZMYND11, ZNF224, GSPT2, RPL15, ZBTB1, BAZ2A, IRF2, FMN2, LYN, TMF1, NFIL3, KDM5A, STAT1, EIF2AK2, AKIRIN2, USP14, ZNF567, PSMA1, ANAPC10, BTAF1, EED, COPS2, TMEM59, PTBP3, GLIS3, MSH2, IKZF4, …
GO:0043628	ncRNA 3'-end processing	18	2	0.13	1779	0.00764	1	1	1	Any process involved in forming the mature 3' end of a non-coding RNA molecule	0.31194	-0.266342	EXOSC6, RPSA, RPS21	INTS7, EXOSC3, SSB
GO:0071824	protein-DNA complex subunit organization	169	5	1.25	1780	0.00808	1	1	1	Any process in which macromolecules aggregate, disaggregate, or are modified, resulting in the formation, disassembly, or alteration of a protein-DNA complex	0.867937	-1.12669	KAT6A, IPO4, H3F3A, GTF2H3, TAF9B, TAF4, UBC, RPA3, HIST1H2BJ, KNL1, KAT6B, THRA, SUPT6H, MIS18BP1, HJURP, H1FX, TSPYL4, RPS27A, GTF2H2, WNT10B, MCM2, SPTY2D1	CETN2, HAT1, CREB1, GTF2B, ITGB3BP, CENPQ, NAP1L1, NPM1, TAF9, PSMC6, CENPI, MNAT1, GTF2H1, CCNH, SENP6, SET, GMNN, HIST2H2BE, RAD52, RBBP4, HIST1H2BC, CENPK, CENPU
GO:0006297	nucleotide-excision repair, DNA gap fill...	19	2	0.14	33	0.0085	0.0085	1	1	Repair of the gap in the DNA helix by DNA polymerase and DNA ligase after the portion of the strand containing the lesion has been removed by pyrimidine-dimer repair enzymes	0.381296	-0.258136	UBC, RPA3, RFC1, RPS27A	PCNA, RFC4
GO:0048519	negative regulation of biological proces...	2764	30	20.45	1343	0.00874	0.56511	1	1	Any process that stops, prevents, or reduces the frequency, rate or extent of a biological process. Biological processes are regulated by many means; examples include the control of gene expression, protein modification or interaction with a protein or substrate molecule	1.20164	-1.65927	ADAMTS1, LRP8, KAT6A, RNF6, FGFR3, SKIL, KLF12, CERS2, PSMA6, KIF14, NPAT, H3F3A, VPS13C, TAX1BP3, C1D, EXOSC6, SOD2, SH3RF1, CNPY2, MEX3D, SOCS7, TOB2, ZBTB18, CDYL, SH3RF2, TSNAX, PNPT1, ARHGAP35, BIRC6, CREBZF, ANAPC7, VILL, TAF9B, WFDC3, PRKAA1, KLF16, MTPN, KREMEN1, ATXN7, CYR61, PDE8A, RPSA, AHR, TIE1, PRKCE, CDK9, HMG20A, HES6, FIGNL1, SOCS4, NDFIP2, UBC, MC1R, BAHD1, CCAR1, LTBP1, BRCA1, …	ITGB1, FAM220A, PSMD5, ZNF675, HAT1, OMA1, PPT1, THRB, UBE2D3, TERF2IP, RPL39, ARRDC3, MTBP, DVL3, LYPLA1, EPC1, GSPT1, RNASEH2B, RNF2, LINC02210-CRHR1, NRK, UCHL5, PSMD12, USP25, NOV, EIF3E, HIGD1A, NFE2L2, PDCD10, TENT2, AZIN1, PTPN12, SNX13, CREB1, SIN3A, DIS3, MARCH7, MPHOSPH10, LRRC17, PAIP1, PFN2, PIK3R1, RHOQ, ITM2B, MAP2K4, INTS7, DYRK1A, ADNP, ZMYND11, GPAM, ZNF224, GSPT2, RPL15, ZBTB1, …
GO:2001022	positive regulation of response to DNA d...	59	3	0.44	1781	0.00935	1	1	1	Any process that activates or increases the frequency, rate or extent of response to DNA damage stimulus	0.515411	-0.765322	SKIL, BRCA1, BABAM1, FOXM1, FAM168A	PCNA, UBE2N, EEF1E1, ABRAXAS1, EGFR, NKX3-1, DDX5, EYA4, FMR1, SETMAR, SLF1, BCLAF1, HMGA2, BRCC3
GO:0043604	amide biosynthetic process	580	10	4.29	1687	0.00962	0.91682	1	1	The chemical reactions and pathways resulting in the formation of an amide, any derivative of an oxoacid in which an acidic hydroxy group has been replaced by an amino or substituted amino group	0.839603	-1.27627	CERS2, MEX3D, GTF2H3, SECISBP2L, PRKAA1, MTPN, CYR61, RPSA, EIF2B1, RPL31, DEGS1, IGFBP5, TNRC6B, SERP1, RPS10, DDX6, LARP4, RPS21, NAGS, MRPL54, GGT7, RPS19, RPL41, FOXO3, MRPS21, ST3GAL5, RPL21, DAPK3, DNAJC3, UQCC2, RPS29, RPS8, RPL10, RPS12, RPL35A, RPL22L1, EIF1AX, PTBP1, SARS2, RPL37A, RPS27A, MTHFD2, GTF2H2, TIA1, RPS23, RPS27L, RPL34, ORMDL3, EIF2AK4, AGO2, EIF2S2, RPLP2, CHCHD1, TRMT10C,…	RPL39, MRPS30, EIF3M, GSPT1, EIF3E, NFE2L2, PAIP1, AASDH, GSPT2, RPL15, MRPL3, EIF2AK2, MRPL1, NCK1, IARS, FAM129A, EIF2A, PPP1R15B, ARG2, NPM1, GCH1, IREB2, PUM2, EIF1B, EEF1E1, C12orf65, RARS, CAPRIN1, EIF3J, DARS2, EGFR, EIF3H, DDX5, HNRNPR, RMND1, MTIF3, RPL36A, ALKBH1, GARS, MRPS9, WARS2, TNRC6A, FMR1, YAE1D1, SSB, PRKRA, MALSU1, SPTSSA, DND1, RGS2, EIF4B, EIF4E, MRPS27, GGCT, TARS, C8orf88,…
GO:0000731	DNA synthesis involved in DNA repair	61	3	0.45	774	0.01025	0.25644	1	1	Synthesis of DNA that proceeds from the broken 3' single-strand DNA end uses the homologous intact duplex as the template	0.577547	-0.75364	UBC, RPA3, BRCA1, RMI1, DNA2, RFC1, RPS27A, BRCA2	POLE2, ZBTB1, PCNA, RFC4, RBBP8, DTL, PRIMPOL, EXO1
GO:0000469	cleavage involved in rRNA processing	21	2	0.16	1782	0.01034	1	1	1	Any phosphodiester bond hydrolysis involved in the conversion of a primary ribosomal RNA (rRNA) transcript into a mature rRNA molecule	0.366756	-0.251309	RPSA, RPS21, FCF1	MRPL1, EXOSC3
GO:0033146	regulation of intracellular estrogen rec...	21	2	0.16	35	0.01034	0.01034	1	1	Any process that modulates the frequency, rate or extent of the activity of an intracellular estrogen receptor signaling pathway	0.276558	-0.538781	SKP2, BRCA1	UBA5, DDX5, ISL1, DDX17, MED1, CNOT2, CNOT1, SRC
GO:0044319	wound healing, spreading of cells	21	2	0.16	36	0.01034	0.01034	1	1	The migration of a cell along or through a wound gap that contributes to the reestablishment of a continuous surface	0.337495	-0.290128	ARHGAP35, CYR61	PDCD10, TMEFF2
GO:0090505	epiboly involved in wound healing	21	2	0.16	37	0.01034	0.01034	1	1	The expansion of one cell sheet over other cells involved in wound healing	0.337495	-0.290128	ARHGAP35, CYR61	PDCD10, TMEFF2
GO:2001237	negative regulation of extrinsic apoptot...	62	3	0.46	38	0.01071	0.01071	1	1	Any process that stops, prevents or reduces the frequency, rate or extent of extrinsic apoptotic signaling pathway	0.583897	-0.591099	SH3RF1, BIRC6, BRCA1, TGFBR1, LMNA, CTTN, HTT, TRADD	ZMYND11, LGALS3, EYA4, PHIP, YAP1, RPS6KB1, STRADB, BMP4, SRC
GO:0043408	regulation of MAPK cascade	334	7	2.47	39	0.01129	0.01129	1	1	Any process that modulates the frequency, rate or extent of signal transduction mediated by the MAP kinase (MAPK) cascade	0.872297	-1.19174	FGFR3, SH3RF1, CARD9, ADAM9, TIAM1, PRKAA1, CYR61, PDE8A, PRKCE, UBC, RASSF2, SMAD4, KRAS, TRIM5, AKAP13, KISS1, CDH2, DUSP10, MADD, TGFBR1, FOXM1, CDK1, FLCN, SEMA7A, MAGED1, S1PR2, PTPRJ, ASH1L, ATF3, MAP2K3, CRKL, MAP3K15, STK40, EFNA1, APIP, HMGCR, RPS27A, EZR, ERP29, IRAK2, JUN, XDH, IKBKG, EDN1, TIMP3, CSPG4, RAPGEF1, RANBP9, PDGFRB, TGFB1, HRAS, F2R, MAP2K1, TNIP1	ZNF675, DVL3, NRK, PDCD10, MAP2K4, ZMYND11, VRK2, LYN, EIF2AK2, UBE2N, PDGFRA, ATP6AP2, SDCBP, HSPH1, TAB2, ARL6IP5, EGFR, AIDA, HIPK3, MAP3K20, IQGAP3, RAP1B, LAMTOR3, DNAJA1, MBIP, GPS2, SYNJ2BP, IQGAP1, RGS2, PIK3CB, SHC1, HACD3, ERN1, RAPGEF2, STK3, NPTN, BMP4, TAOK3, RYK, NF1, SPRY2, PHLPP1, RIPK2, WNT5A, MAP3K9, SPRY4, SRC
GO:0090504	epiboly	22	2	0.16	40	0.01132	0.01132	1	1	The expansion of one cell sheet over other cells or yolk	0.350612	-0.290128	ARHGAP35, CYR61	PDCD10, TMEFF2
GO:1902531	regulation of intracellular signal trans...	984	14	7.28	434	0.01141	0.12706	1	1	Any process that modulates the frequency, rate or extent of intracellular signal transduction	1.04343	-1.4652	KAT6A, FGFR3, SKIL, ARHGAP18, KIF14, SOD2, SH3RF1, CARD9, SOCS7, ADAM9, ARHGAP35, TIAM1, TAF9B, PRKAA1, CHUK, CYR61, PDE8A, TAF4, EPS8L1, PRKCE, FIGNL1, SOCS4, NDFIP2, UBC, MC1R, RPA3, TRIO, BRCA1, RCAN3, SHOC2, MYO5A, RMI1, RASSF2, IGFBP5, SMAD4, DNA2, KRAS, LAMTOR4, TRIM5, AKAP13, PLXNB1, RC3H2, MDM4, OSBPL8, KISS1, CDH2, S100A4, VAV2, GSK3B, RHOBTB2, PREX1, FNIP1, CBL, DUSP10, MADD, DENND1A, T…	ITGB1, ATP2C1, ZNF675, TERF2IP, DVL3, NRK, NOV, NFE2L2, PDCD10, HPSE, TAF5, PIK3R1, RHOQ, MAP2K4, DYRK1A, ZMYND11, VRK2, LYN, RASGRF1, STAT1, EIF2AK2, DNM1L, RASA1, ARHGAP5, UBE2N, CSNK2A2, RTN4, NCK1, TAF9, TRIM13, GPRC5B, PUM2, COL3A1, EEF1E1, PRNP, PDGFRA, ATP6AP2, TOPBP1, SDCBP, HSPH1, TAB2, CALM2, PPP2R5C, DEPDC7, DNMBP, OPHN1, ARL6IP5, PRKAB2, MEAF6, ZFAND6, UBE3A, RFC4, IVNS1ABP, EGFR, AID…
GO:0055114	oxidation-reduction process	596	10	4.41	184	0.01153	0.05519	1	1	A metabolic process that results in the removal or addition of one or more electrons to or from a substance, with or without the concomitant removal or addition of a proton or protons	1.0145	-1.0921	TMX1, EGLN2, PPP1R3D, SOD2, PNPT1, D2HGDH, UQCRHL, PRKAA1, MTHFR, NDUFA11, UBC, DEGS1, NDUFA2, CYB5B, NDUFB2, MECP2, PECR, PFKFB4, PYGB, CYB561D1, GSK3B, NUDT19, CDK1, LBR, ACAD8, KDM1B, NDUFB6, RDH5, NDUFA9, HIF1A, UQCRQ, CPOX, SCCPDH, HIGD2A, STK40, STBD1, COX10, DOHH, ALKBH7, DPYD, HMGCR, P4HB, RPS27A, PYROXD2, MTHFD2, GFOD1, AKR1C3, ABCD1, IRS1, HSD17B1, AAED1, IMPDH1, XDH, CYB561D2, ALDH3A2,…	UGP2, HIGD1A, GPD2, ABCC4, NBPF9, UQCRB, KDM5A, TXNL1, ERO1A, SQLE, FASTKD3, ALKBH8, NDUFS1, ABCD3, OXR1, CALM2, ALDH5A1, AP003108.2, ACADSB, JMJD1C, CYP20A1, SCP2, KDM5D, NBPF20, ALKBH1, ACADM, PMPCB, PLOD2, IDH3A, GFPT1, NDUFA12, ALDH9A1, KDM3A, HSD17B11, ME2, GYG1, MICAL2, PPP1R3E, ADIPOR1, GDI2, PDHB, MGST1, CRYZL1, NOA1, RRM2B, AUH, RDH11, PEX2, TMX3, ETFDH, NBPF1, MTO1, CYP27C1, ASPH, GAPDH…
GO:1903507	negative regulation of nucleic acid-temp...	692	11	5.12	41	0.01183	0.01183	1	1	Any process that stops, prevents or reduces the frequency, rate or extent of nucleic acid-templated transcription	1.07575	-1.43848	LRP8, KAT6A, SKIL, KLF12, NPAT, H3F3A, C1D, TOB2, ZBTB18, CDYL, ARHGAP35, CREBZF, TAF9B, KLF16, AHR, HMG20A, HES6, UBC, BAHD1, CCAR1, BRCA1, GFI1, TBX2, GON4L, RTF1, EGR1, SMAD4, PPM1F, ATOH8, MECP2, CBX6, MDM4, SUV39H2, KAT6B, TSC22D3, LGR4, SUFU, THRA, SCMH1, SUPT6H, TNRC18, JARID2, FNIP1, SBNO2, ZHX2, MPHOSPH8, NKX3-2, NR1D2, GATA2, FOXO3, FOXM1, FLCN, RPL10, ZNF703, MAGED1, ZFHX3, POU2F1, FAM…	FAM220A, ZNF675, HAT1, THRB, UBE2D3, EPC1, RNF2, CREB1, SIN3A, ZMYND11, ZNF224, ZBTB1, BAZ2A, IRF2, NFIL3, KDM5A, STAT1, AKIRIN2, ZNF567, BTAF1, EED, COPS2, GLIS3, IKZF4, NCK1, SMURF2, UBA3, SUMO1, RBAK, ZBTB33, ZNF85, AEBP2, BASP1, NR2C1, WWP1, STRAP, CHCHD3, NKX3-1, NFE2L3, DR1, DDX5, ZBTB38, MTERF3, ZNF189, CGGBP1, TFAP2A, ZNF93, BPTF, NR2F1, GREM1, SET, ISL1, USP47, HIST1H2AC, GPS2, RBBP8, ME…
GO:0006282	regulation of DNA repair	65	3	0.48	1783	0.01218	1	1	1	Any process that modulates the frequency, rate or extent of DNA repair	0.635397	-0.794967	PPP4R2, CDK9, FIGNL1, BRCA1, PARPBP, BABAM1, FOXM1, FAM168A, SIRT6	TERF2IP, PCNA, UBE2N, ABRAXAS1, EGFR, EYA4, RAD52, SETMAR, TRIP12, SLF1, HMGA2, OGG1, BRCC3
GO:0019058	viral life cycle	340	7	2.52	950	0.01237	0.34949	1	1	A set of processes which all viruses follow to ensure survival; includes attachment and entry of the virus particle, decoding of genome information, translation of viral mRNA by host ribosomes, genome replication, and assembly and release of viral particles containing the genome	0.691636	-1.19147	RPSA, CDK9, UBC, RPL31, CCNK, TRIM5, RPS10, DDX6, RPS21, RPS19, LDLR, RPL41, TOP2A, TAP2, RPL21, RPS29, RPS8, RPL10, RPS12, RPL35A, TFAP4, NOTCH1, TAP1, PTBP1, RPL37A, MAVS, P4HB, TRIM32, SIVA1, RPS27A, CHMP1A, JUN, RPS23, RPL34, CHMP7, POM121C, EIF2AK4, KPNA1, RPLP2, RAE1, TNIP1, CTDP1	ITGB1, RPL39, XPR1, GTF2B, RPL15, EIF2AK2, VPS37A, VTA1, SNX3, NUP35, TRIM13, NUPL2, NUP54, GTF2F2, AC068234.1, WWP1, KPNA3, CHMP2B, OAS3, FAM111A, NUP37, ATG5, DDX5, VAPA, NUP205, RPL36A, RAB1A, NUP88, FMR1, DERL1, ZC3HAV1, SRPK1, SSB, ZNF639, CHMP3, HACD3, RPL17-C18orf32, YTHDC2, RPL17, RPL9, AXL, KPNA4, THOC2, HSPA8, PDCD6IP, HMGA2, POLR2A, PABPC1, SRPK2, RAB7A, TRIM21, PPIA, PPID, APOBEC3C, N…
GO:0000956	nuclear-transcribed mRNA catabolic proce...	189	5	1.4	1784	0.01272	1	1	1	The chemical reactions and pathways resulting in the breakdown of nuclear-transcribed mRNAs in eukaryotic cells	0.686534	-1.13402	EXOSC6, RPSA, RPL31, TNRC6B, RPS10, DDX6, RPS21, RPS19, RPL41, LSM5, EDC3, RPL21, RPS29, RPS8, RPL10, RPS12, RPL35A, THRAP3, RPL37A, RPS27A, RPS23, RPL34, AGO2, RPLP2	RPL39, GSPT1, EIF3E, TENT2, DIS3, PAIP1, GSPT2, RPL15, UPF2, TTC37, EXOSC3, DDX5, LSM1, PPP2R2A, RPL36A, SSB, PATL1, EIF4B, EIF4E, PNRC2, CNOT2, RPL17-C18orf32, RC3H1, RPL17, RPL9, CNOT1, EXOSC9, HBS1L, EIF4A2, PABPC1, ZFP36L1, SMG8
GO:1902679	negative regulation of RNA biosynthetic ...	700	11	5.18	42	0.01282	0.01282	1	1	Any process that stops, prevents or reduces the frequency, rate or extent of RNA biosynthetic process	1.07575	-1.43848	LRP8, KAT6A, SKIL, KLF12, NPAT, H3F3A, C1D, TOB2, ZBTB18, CDYL, ARHGAP35, CREBZF, TAF9B, KLF16, AHR, HMG20A, HES6, UBC, BAHD1, CCAR1, BRCA1, GFI1, TBX2, GON4L, RTF1, EGR1, SMAD4, PPM1F, ATOH8, MECP2, CBX6, MDM4, SUV39H2, KAT6B, TSC22D3, LGR4, SUFU, THRA, SCMH1, SUPT6H, TNRC18, JARID2, FNIP1, SBNO2, ZHX2, MPHOSPH8, NKX3-2, NR1D2, GATA2, FOXO3, FOXM1, FLCN, RPL10, ZNF703, MAGED1, ZFHX3, POU2F1, FAM…	FAM220A, ZNF675, HAT1, THRB, UBE2D3, EPC1, RNF2, CREB1, SIN3A, ZMYND11, ZNF224, ZBTB1, BAZ2A, IRF2, NFIL3, KDM5A, STAT1, AKIRIN2, ZNF567, BTAF1, EED, COPS2, GLIS3, IKZF4, NCK1, SMURF2, UBA3, SUMO1, RBAK, ZBTB33, TRIM13, ZNF85, AEBP2, BASP1, NR2C1, WWP1, STRAP, CHCHD3, NKX3-1, NFE2L3, DR1, DDX5, ZBTB38, MTERF3, ZNF189, CGGBP1, TFAP2A, ZNF93, BPTF, NR2F1, GREM1, SET, ISL1, USP47, HIST1H2AC, GPS2, R…
GO:0080135	regulation of cellular response to stres...	435	8	3.22	865	0.01432	0.30503	1	1	Any process that modulates the frequency, rate or extent of a cellular response to stress. Cellular response to stress is a change in state or activity of a cell (in terms of movement, secretion, enzyme production, gene expression, etc.) as a result of a stimulus indicating the organism is under stress. The stress is usually, but not necessarily, exogenous (e.g. temperature, humidity, ionizing ra…	0.968817	-1.33056	SKIL, CERS2, VPS13C, PPP4R2, SOD2, SH3RF1, CARD9, PNPT1, TIAM1, TAF9B, PDE8A, CDK9, FIGNL1, RPA3, BRCA1, RASSF2, KRAS, PARPBP, BABAM1, GSK3B, ARMT1, CHORDC1, DUSP10, EDEM1, FOXO3, FOXM1, DNAJC3, ERLEC1, OPA1, FAM168A, HIF1A, MUC1, CHEK2, SZT2, HMGCR, BFAR, P4HB, TRIM32, MAPT, EZR, UBAC2, ERP29, POM121C, XDH, EDN1, EIF2AK4, BAK1, HSPA5, RAPGEF1, SIRT6, RAE1, HRAS, RINT1, MAP2K1	ZNF675, TERF2IP, DVL3, RNASEH2B, NRK, USP25, NFE2L2, PDCD10, PIK3R1, MAP2K4, DYRK1A, ZMYND11, PCNA, HSP90AA1, LYN, SPP1, PTGES3, EIF2AK2, USP14, UBE2N, NCK1, PPP1R15B, NPM1, NUP35, TAF9, NUPL2, GCH1, NUP54, EEF1E1, OXR1, SDCBP, HSPH1, ARL6IP5, ABRAXAS1, EGFR, AIDA, NUP37, NKX3-1, HIPK3, MAP3K20, DDX5, FUT8, NUP205, TPT1, DNAJA1, DNAJC2, MBIP, EYA4, USP47, NUP88, GPS2, FMR1, RAD52, SERINC3, SETMAR…
GO:0010648	negative regulation of cell communicatio...	712	11	5.27	43	0.01443	0.01443	1	1	Any process that decreases the frequency, rate or extent of cell communication. Cell communication is the process that mediates interactions between a cell and its surroundings. Encompasses interactions such as signaling or attachment between one cell and another cell, between a cell and an extracellular matrix, or between a cell and any other aspect of its environment	0.946595	-1.42229	SKIL, PSMA6, TAX1BP3, SOD2, SH3RF1, SOCS7, ARHGAP35, BIRC6, TAF9B, PRKAA1, KREMEN1, ATXN7, FIGNL1, SOCS4, UBC, LTBP1, BRCA1, RASSF2, IGFBP5, EGR1, SMAD4, PALM3, PTPN3, MIDN, CDH2, GSK3B, LGR4, SUFU, LEMD3, PREX1, FNIP1, CBL, DUSP10, TGFBR1, GATA2, FOXO3, FOXM1, STAM, PLCL2, SYT11, RAB11FIP5, NLRP3, SLC35F6, FLCN, OPA1, LEPROT, S1PR2, FAM129B, PTPRJ, UBR2, ASH1L, LMNA, NPHP4, IFT122, NOTCH1, CTTN,…	ITGB1, PSMD5, ZNF675, DVL3, PSMD12, NOV, NFE2L2, PTPN12, SNX13, DYRK1A, ADNP, ZMYND11, PRKACB, LYN, LY96, STAT1, LPXN, PSMA1, RASA1, NCK1, PPP1R15B, SMURF2, TAF9, PSMC6, PRNP, PDGFRA, BICC1, PIAS2, HSPH1, CALM2, PAK1IP1, STRAP, PSMA4, IVNS1ABP, EGFR, AIDA, AP003108.2, GRB14, NKX3-1, HIPK3, SH3BP4, TPT1, LATS2, LGALS3, RAP1B, DNAJA1, GREM1, MBIP, LMBRD1, MEIS3, EYA4, ISL1, USP47, BCHE, GPS2, FMR1,…
GO:0015980	energy derivation by oxidation of organi...	196	5	1.45	476	0.01469	0.14209	1	1	The chemical reactions and pathways by which a cell derives energy from organic compounds; results in the oxidation of the compounds from which energy is released	0.765855	-0.834576	PPP1R3D, PNPT1, D2HGDH, UQCRHL, NDUFA11, UBC, NDUFA2, NDUFB2, MECP2, PYGB, GSK3B, CDK1, NDUFB6, NDUFA9, HIF1A, UQCRQ, STK40, STBD1, COX10, RPS27A, IRS1, PPP1CB, TAZ	UGP2, UQCRB, FASTKD3, NDUFS1, CALM2, ALDH5A1, AP003108.2, PMPCB, IDH3A, GFPT1, NDUFA12, GYG1, PPP1R3E, PDHB, NOA1, ETFDH, NNT, NDUFB1, FASTKD2, SLC25A13, PPP1CC, NDUFA6, PANK2
GO:0023057	negative regulation of signaling	714	11	5.28	44	0.01471	0.01471	1	1	Any process that stops, prevents, or reduces the frequency, rate or extent of a signaling process	0.946595	-1.42229	SKIL, PSMA6, TAX1BP3, SOD2, SH3RF1, SOCS7, ARHGAP35, BIRC6, TAF9B, PRKAA1, KREMEN1, ATXN7, FIGNL1, SOCS4, UBC, LTBP1, BRCA1, RASSF2, IGFBP5, EGR1, SMAD4, PALM3, PTPN3, MIDN, CDH2, GSK3B, LGR4, SUFU, LEMD3, PREX1, FNIP1, CBL, DUSP10, TGFBR1, GATA2, FOXO3, FOXM1, STAM, PLCL2, SYT11, RAB11FIP5, NLRP3, SLC35F6, FLCN, OPA1, LEPROT, S1PR2, FAM129B, PTPRJ, UBR2, ASH1L, LMNA, NPHP4, IFT122, NOTCH1, CTTN,…	ITGB1, PSMD5, ZNF675, DVL3, PSMD12, NOV, NFE2L2, PTPN12, SNX13, DYRK1A, ADNP, ZMYND11, PRKACB, LYN, LY96, STAT1, LPXN, PSMA1, RASA1, NCK1, PPP1R15B, SMURF2, TAF9, PSMC6, PRNP, PDGFRA, BICC1, PIAS2, HSPH1, CALM2, PAK1IP1, STRAP, PSMA4, IVNS1ABP, EGFR, AIDA, AP003108.2, GRB14, NKX3-1, HIPK3, SH3BP4, TPT1, LATS2, LGALS3, RAP1B, DNAJA1, GREM1, MBIP, LMBRD1, MEIS3, EYA4, ISL1, USP47, BCHE, GPS2, FMR1,…
GO:0001951	intestinal D-glucose absorption	2	1	0.01	45	0.01474	0.01474	1	1	Uptake of D-glucose into the blood by absorption from the small intestine	0.0368417	0.0368417	EZR
GO:0003278	apoptotic process involved in heart morp...	2	1	0.01	46	0.01474	0.01474	1	1	Any apoptotic process that contributes to the shaping of the heart	0.215168	0.215168	CYR61
GO:0006407	rRNA export from nucleus	2	1	0.01	47	0.01474	0.01474	1	1	The directed movement of rRNA from the nucleus to the cytoplasm; the rRNA is usually in the form of ribonucleoproteins	0.195538	0.195538	RPSA
GO:0010609	mRNA localization resulting in posttrans...	2	1	0.01	48	0.01474	0.01474	1	1	Any process that modulates the frequency, rate or extent of gene expression after the production of a mRNA transcript by its transport into, or maintainance in, a specific location within the cell	0.412017	0.412017	MEX3D
GO:0014722	regulation of skeletal muscle contractio...	2	1	0.01	1785	0.01474	1	1	1	Any process that modulates the frequency, rate or extent of skeletal muscle contraction by changing the calcium ion signals that trigger contraction	0.227817	0.227817	GSTO1
GO:0014819	regulation of skeletal muscle contractio...	2	1	0.01	1786	0.01474	1	1	1	Any process that modulates the frequency, rate or extent of skeletal muscle contraction	0.227817	0.227817	GSTO1
GO:0021539	subthalamus development	2	1	0.01	49	0.01474	0.01474	1	1	The process whose specific outcome is the progression of the subthalamus over time, from its formation to the mature structure. The subthalamus is the anterior part of the diencephalon that lies between the thalamus, hypothalamus, and tegmentum of the mesencephalon, including subthalamic nucleus, zona incerta, the fields of Forel, and the nucleus of ansa lenticularis	0.24304	0.24304	UQCRQ
GO:0032276	regulation of gonadotropin secretion	2	1	0.01	50	0.01474	0.01474	1	1	Any process that modulates the frequency, rate or extent of the regulated release of a gonadotropin	0.656962	0.656962	SMAD4, KISS1
GO:0032278	positive regulation of gonadotropin secr...	2	1	0.01	51	0.01474	0.01474	1	1	Any process that activates or increases the frequency, rate or extent of the regulated release of a gonadotropin	0.656962	0.656962	SMAD4, KISS1
GO:0033132	negative regulation of glucokinase activ...	2	1	0.01	52	0.01474	0.01474	1	1	Any process that stops, prevents, or reduces the frequency, rate or extent of glucokinase activity, the catalysis of the transfer of a phosphate group, usually from ATP, to a glucose molecule	0.228767	0.228767	MIDN
GO:0033684	regulation of luteinizing hormone secret...	2	1	0.01	53	0.01474	0.01474	1	1	Any process that modulates the frequency, rate or extent of the regulated release of luteinizing hormone	0.656962	0.656962	SMAD4, KISS1
GO:0033686	positive regulation of luteinizing hormo...	2	1	0.01	54	0.01474	0.01474	1	1	Any process that activates or increases the frequency, rate or extent of the regulated release of luteinizing hormone	0.656962	0.656962	SMAD4, KISS1
GO:0036135	Schwann cell migration	2	1	0.01	1787	0.01474	1	1	1	The orderly movement of a Schwann cell from one site to another. A Schwann cell is a glial cell that ensheathes axons of neuron in the peripheral nervous system and is necessary for their maintainance and function	0.99079	0.99079	CERS2, TIAM1
GO:0071460	cellular response to cell-matrix adhesio...	2	1	0.01	55	0.01474	0.01474	1	1	Any process that results in a change in state or activity of a cell (in terms of movement, secretion, enzyme production, gene expression, etc.) as a result of cell-matrix adhesion	0.60482	0.60482	SKP2
GO:0072697	protein localization to cell cortex	2	1	0.01	56	0.01474	0.01474	1	1	A process in which a protein is transported to, or maintained in, the cell cortex	0.264684	0.264684	EZR
GO:0106001	intestinal hexose absorption	2	1	0.01	57	0.01474	0.01474	1	1		0.0368417	0.0368417	EZR
GO:1900147	regulation of Schwann cell migration	2	1	0.01	1788	0.01474	1	1	1	Any process that modulates the frequency, rate or extent of Schwann cell migration	0.99079	0.99079	CERS2, TIAM1
GO:1902340	negative regulation of chromosome conden...	2	1	0.01	58	0.01474	0.01474	1	1	Any process that stops, prevents or reduces the frequency, rate or extent of chromosome condensation	0.475672	0.475672	H3F3A
GO:1902896	terminal web assembly	2	1	0.01	59	0.01474	0.01474	1	1	The aggregation, arrangement and bonding together of a set of components to form a terminal web	0.0368417	0.0368417	EZR
GO:1903300	negative regulation of hexokinase activi...	2	1	0.01	60	0.01474	0.01474	1	1	Any process that stops, prevents or reduces the frequency, rate or extent of hexokinase activity	0.228767	0.228767	MIDN
GO:1903976	negative regulation of glial cell migrat...	2	1	0.01	1789	0.01474	1	1	1		0.48611	0.48611	CERS2
GO:1901564	organonitrogen compound metabolic proces...	1445	18	10.69	1669	0.01495	0.88016	1	1	The chemical reactions and pathways involving organonitrogen compound	1.06725	-1.51948	SPNS2, CERS2, PSMA6, GPC2, EGLN2, SLC25A32, MEX3D, GTF2H3, ADSS, FTCD, MBOAT2, THTPA, SECISBP2L, UQCRHL, PRKAA1, MTHFR, MTPN, CYR61, ARSI, PDE8A, RPSA, NDUFA11, PSPH, FIGNL1, CSGALNACT2, MC1R, PXYLP1, EIF2B1, MRAP, ST3GAL2, RPL31, DEGS1, RFK, SLC22A5, IGFBP5, TNRC6B, NDUFA2, DCTPP1, BPNT1, SLC46A1, SERP1, UMPS, RPS10, DDX6, NDUFB2, LARP4, RPS21, MECP2, NAGS, OSBPL8, MRPL54, PFKFB4, PDXK, LNPEP, G…	PSMD5, EXTL2, PPCS, PPT1, ATP5F1EP2, RPL39, MRPS30, EIF3M, GSPT1, MMADHC, LINC02210-CRHR1, PSMD12, EIF3E, NFE2L2, AZIN1, PAIP1, HPSE, AASDH, RHOQ, PRKD3, CPE, ADNP, GSPT2, RPL15, SLC22A4, UQCRB, HSP90AA1, MRPL3, EIF2AK2, DNM1L, HMMR, PSMA1, CPA3, MRPL1, LUM, CSNK2A2, MSH2, ERO1A, NCK1, IARS, FAM129A, EIF2A, PPP1R15B, ARG2, NPEPPS, NPM1, GCH1, IREB2, PUM2, PSMC6, EIF1B, NAMPT, EEF1E1, C12orf65, ND…
GO:0006643	membrane lipid metabolic process	129	4	0.95	1249	0.01506	0.50342	1	1	The chemical reactions and pathways involving membrane lipids, any lipid found in or associated with a biological membrane	0.814611	-0.813702	SPNS2, CERS2, PRKAA1, CYR61, ARSI, DEGS1, POGLUT1, ST3GAL5, PIGW, SPHK1, CSNK1G2, ORMDL3, ALDH3A2, A4GALT	PPT1, PRKD3, ARSK, ALDH5A1, PIGC, VAPA, PLPP1, DPM1, SPTSSA, SERINC3, PIGP, CTSA, PIGU, CERKL, HACD2, PIGS, AGK, SAMD8
GO:0000460	maturation of 5.8S rRNA	26	2	0.19	1790	0.01562	1	1	1	Any process involved in the maturation of a precursor 5.8S ribosomal RNA (rRNA) molecule into a mature 5.8S rRNA molecule	0.426168	-0.589101	C1D, RPSA, RPS21, FCF1	MTREX, RPF1, RRP15, EXOSC3, MAK16
GO:0006294	nucleotide-excision repair, preincision ...	26	2	0.19	61	0.01562	0.01562	1	1	The aggregation, arrangement and bonding together of proteins on DNA to form the multiprotein complex involved in damage recognition, DNA helix unwinding, and endonucleolytic cleavage at the site of DNA damage. This assembly occurs before the phosphodiester backbone of the damaged strand is cleaved 3' and 5' of the site of DNA damage	0.484254	-0.50394	GTF2H3, UBC, RPA3, RPS27A, GTF2H2	CETN2, MNAT1, GTF2H1, CCNH
GO:0010646	regulation of cell communication	1677	20	12.41	353	0.01575	0.09992	1	1	Any process that modulates the frequency, rate or extent of cell communication. Cell communication is the process that mediates interactions between a cell and its surroundings. Encompasses interactions such as signaling or attachment between one cell and another cell, between a cell and an extracellular matrix, or between a cell and any other aspect of its environment	1.15273	-1.55699	LRP8, KAT6A, RNF6, SKP2, FGFR3, SKIL, ARHGAP18, PSMA6, KIF14, TAX1BP3, SOD2, SH3RF1, CARD9, SOCS7, ADAM9, ARHGAP35, TIAM1, BIRC6, TAF9B, PRKAA1, CHUK, KREMEN1, ATXN7, CYR61, PDE8A, TAF4, EPS8L1, PRKCE, FIGNL1, SOCS4, NDFIP2, IFNGR2, NCOA3, UBC, MC1R, RPA3, TRIO, LTBP1, BRCA1, RCAN3, GFI1, PIDD1, SHOC2, MYO5A, RMI1, RASSF2, IGFBP5, EGR1, SMAD4, DNA2, RAB8B, PALM3, KRAS, PTPN3, LAMTOR4, TRIM5, SERP…	ITGB1, PSMD5, ATP2C1, ZNF675, TERF2IP, ARRDC3, DVL3, LINC02210-CRHR1, NRK, PSMD12, NOV, NFE2L2, PDCD10, SLC9A6, PTPN12, SNX13, CREB1, HPSE, PFN2, TAF5, PIK3R1, RHOQ, MAP2K4, DYRK1A, ADNP, SH3BGRL, ZMYND11, PRKACB, YWHAZ, VRK2, LYN, LY96, RASGRF1, STAT1, EIF2AK2, LPXN, DNM1L, PSMA1, RASA1, ARHGAP5, UBE2N, CSNK2A2, RTN4, NCK1, SPPL2A, EIF2A, PPP1R15B, SMURF2, SNX3, SUMO1, TAF9, TRIM13, GPRC5B, PUM2…
GO:0045934	negative regulation of nucleobase-contai...	822	12	6.08	1791	0.0161	1	1	1	Any cellular process that stops, prevents, or reduces the frequency, rate or extent of the chemical reactions and pathways involving nucleobases, nucleosides, nucleotides and nucleic acids	1.07575	-1.47893	LRP8, KAT6A, SKIL, KLF12, NPAT, H3F3A, C1D, TOB2, ZBTB18, CDYL, ARHGAP35, CREBZF, TAF9B, KLF16, AHR, CDK9, HMG20A, HES6, UBC, BAHD1, CCAR1, BRCA1, GFI1, TBX2, GON4L, RTF1, EGR1, SMAD4, PPM1F, ATOH8, MECP2, CBX6, PARPBP, MDM4, SUV39H2, KAT6B, TSC22D3, LGR4, SUFU, THRA, SCMH1, SUPT6H, TNRC18, JARID2, FNIP1, SBNO2, ZHX2, MPHOSPH8, NKX3-2, NR1D2, GATA2, FOXO3, FOXM1, FLCN, RPL10, ZNF703, MAGED1, ZFHX…	FAM220A, ZNF675, HAT1, THRB, UBE2D3, TERF2IP, EPC1, RNF2, CREB1, SIN3A, DYRK1A, ZMYND11, ZNF224, ZBTB1, BAZ2A, IRF2, NFIL3, KDM5A, STAT1, AKIRIN2, ZNF567, BTAF1, EED, COPS2, PTBP3, GLIS3, MSH2, IKZF4, NCK1, SMURF2, UBA3, SUMO1, RBAK, ZBTB33, TRIM13, ZNF85, AEBP2, BASP1, NR2C1, WWP1, STRAP, CHCHD3, NKX3-1, MSH6, NFE2L3, DR1, DDX5, ZBTB38, MTERF3, ZNF189, CGGBP1, TFAP2A, ZNF93, BPTF, DNAJC2, NR2F1,…
GO:2001020	regulation of response to DNA damage sti...	133	4	0.98	1258	0.01668	0.51059	1	1	Any process that modulates the frequency, rate or extent of response to DNA damage stimulus	0.761654	-0.993392	SKIL, PPP4R2, TAF9B, CDK9, FIGNL1, BRCA1, PARPBP, BABAM1, ARMT1, FOXM1, FAM168A, MUC1, CHEK2, TRIM32, MAPT, SIRT6, RINT1	TERF2IP, RNASEH2B, DYRK1A, PCNA, UBE2N, TAF9, EEF1E1, ABRAXAS1, EGFR, NKX3-1, DDX5, TPT1, EYA4, USP47, FMR1, RAD52, SETMAR, TRIP12, SLF1, TRIAP1, BCLAF1, HMGA2, OGG1, PTTG1IP, BRCC3
GO:0051172	negative regulation of nitrogen compound...	930	13	6.88	1542	0.01707	0.72242	1	1	Any process that stops, prevents, or reduces the frequency, rate or extent of the chemical reactions and pathways involving nitrogen or nitrogenous compounds	1.07984	-1.48832	LRP8, KAT6A, SKIL, KLF12, NPAT, H3F3A, C1D, MEX3D, TOB2, ZBTB18, CDYL, ARHGAP35, CREBZF, TAF9B, PRKAA1, KLF16, AHR, CDK9, HMG20A, HES6, UBC, BAHD1, CCAR1, BRCA1, GFI1, TBX2, GON4L, RTF1, IGFBP5, EGR1, SMAD4, TNRC6B, PPM1F, ATOH8, MECP2, CBX6, PARPBP, MDM4, SUV39H2, KAT6B, TSC22D3, LGR4, SUFU, THRA, SCMH1, SUPT6H, TNRC18, JARID2, FNIP1, SBNO2, ZHX2, MPHOSPH8, NKX3-2, NR1D2, GATA2, FOXO3, FOXM1, DA…	FAM220A, ZNF675, HAT1, THRB, UBE2D3, TERF2IP, EPC1, RNF2, EIF3E, CREB1, SIN3A, DYRK1A, ZMYND11, ZNF224, ZBTB1, BAZ2A, IRF2, NFIL3, KDM5A, STAT1, EIF2AK2, AKIRIN2, ZNF567, BTAF1, EED, COPS2, PTBP3, GLIS3, MSH2, IKZF4, NCK1, SMURF2, UBA3, SUMO1, RBAK, ZBTB33, TRIM13, ZNF85, IREB2, PUM2, AEBP2, BASP1, NR2C1, CAPRIN1, WWP1, STRAP, EGFR, CHCHD3, NKX3-1, MSH6, NFE2L3, DR1, DDX5, ZBTB38, MTERF3, ZNF189,…
GO:0006402	mRNA catabolic process	204	5	1.51	1792	0.0172	1	1	1	The chemical reactions and pathways resulting in the breakdown of mRNA, messenger RNA, which is responsible for carrying the coded genetic 'message', transcribed from DNA, to sites of protein assembly at the ribosomes	0.717965	-1.13402	EXOSC6, PNPT1, RPSA, RPL31, TNRC6B, RPS10, DDX6, RPS21, RPS19, ZHX2, RPL41, LSM5, EDC3, RPL21, RPS29, RPS8, RPL10, RPS12, RPL35A, THRAP3, RPL37A, RPS27A, RPS23, RPL34, AGO2, RPLP2	RPL39, GSPT1, EIF3E, TENT2, DIS3, PAIP1, GSPT2, RPL15, UPF2, TTC37, EXOSC3, DDX5, LSM1, HNRNPR, PPP2R2A, RPL36A, FMR1, ZC3HAV1, SSB, PATL1, EIF4B, EIF4E, PNRC2, CNOT2, RPL17-C18orf32, RC3H1, ERN1, RPL17, RPL9, CNOT1, SUPV3L1, EXOSC9, HBS1L, EIF4A2, PABPC1, ZFP36L1, SMG8
GO:0007265	Ras protein signal transduction	204	5	1.51	62	0.0172	0.0172	1	1	A series of molecular signals within the cell that are mediated by a member of the Ras superfamily of proteins switching to a GTP-bound active state	0.819697	-0.97734	KIF14, TAX1BP3, ARHGAP35, TIAM1, CHUK, EPS8L1, TRIO, NRAS, SHOC2, KRAS, AKAP13, VAV2, PREX1, MADD, DENND1A, FOXM1, PLEKHG3, GPR4, FLCN, CRKL, RASSF1, ARHGAP44, ARF6, RDX, PLEKHG4, GPR17, JUN, DENND4B, RAPGEF1, PDGFRB, HRAS, F2R, ARFGEF2	ITGB1, RASGRF1, DOK3, RASA1, ARHGAP5, COL3A1, DNMBP, IQGAP3, SOS2, ARHGEF12, AGTR1, RAP1B, GNA13, SYNJ2BP, NOTCH2, HACE1, F2RL2, SHC1, HACD3, CTNNAL1, RAPGEF2, CDC42EP3, CYFIP1, MET, NF1, SPRY2, STAMBP, EPS8, ROBO1, NCKAP1, RRAS2, PLEKHG5, ECT2, PSD3, PPP2CB, ARHGEF26, PLEKHG7
GO:0090305	nucleic acid phosphodiester bond hydroly...	204	5	1.51	558	0.0172	0.16578	1	1	The nucleic acid metabolic process in which the phosphodiester bonds between nucleotides are cleaved by hydrolysis	0.789116	-0.994129	POLR3K, GTF2H3, PNPT1, RPSA, UBC, RPA3, POP1, GEN1, DNA2, DCLRE1B, RPS21, EDC3, RNASEK, FCF1, RFC1, APEX2, RPS27A, REXO5, GTF2H2, AGO2, KPNA1, MRPL44, CASP3, TSEN54	RNASEH2B, DIS3, PCNA, DCLRE1C, TATDN1, MRPL1, TSEN15, REXO2, TSN, PCF11, RFC4, GTF2H1, EXOSC3, EXD2, RBBP8, TDP2, EXOG, SETMAR, FIP1L1, ENPP2, KIAA0391, PNRC2, LACTB2, CNOT2, ERN1, CNOT1, EXOSC9, EXO1, OGG1, POLA1
GO:0007569	cell aging	74	3	0.55	63	0.01725	0.01725	1	1	An aging process that has as participant a cell after a cell has stopped dividing. Cell aging may occur when a cell has temporarily stopped dividing through cell cycle arrest (GO:0007050) or when a cell has permanently stopped dividing, in which case it is undergoing cellular senescence (GO:0090398). May precede cell death (GO:0008219) and succeed cell maturation (GO:0048469)	0.676941	-0.614424	KAT6A, PNPT1, TBX2, KRAS, FOXM1, CDK1, OPA1, ROMO1, LMNA, TBX3, CHEK2, BRCA2, HRAS, MAP2K1	SMC6, NPM1, EEF1E1, CDK6, ID2, NUAK1, HMGA2
GO:0031145	anaphase-promoting complex-dependent cat...	74	3	0.55	64	0.01725	0.01725	1	1	The chemical reactions and pathways resulting in the breakdown of a protein or peptide by hydrolysis of its peptide bonds, initiated by the covalent attachment of ubiquitin, with ubiquitin-protein ligation catalyzed by the anaphase-promoting complex, and mediated by the proteasome	0.685153	-0.898515	SKP2, PSMA6, ANAPC7, UBC, CDK1, FBXO31, ANAPC11, ANAPC2, RPS27A	PSMD5, PSMD12, PSMA1, ANAPC10, PSMC6, CDC23, PSMA4, PSMD14, PSMD6, UBE2E1, CDC27, PSMD7
GO:0008285	negative regulation of cell proliferatio...	364	7	2.69	163	0.01743	0.04785	1	1	Any process that stops, prevents or reduces the rate or extent of cell proliferation	0.884048	-1.13815	ADAMTS1, CERS2, TAX1BP3, SOD2, TOB2, IGFBP5, SMAD4, ATOH8, PLXNB1, MDM4, KISS1, JARID2, PBRM1, RNF10, TGFBR1, GATA2, CASK, FLCN, MAGED1, FAM129B, PTPRJ, LMNA, TFAP4, IFT122, NOTCH1, TSPO, RASSF5, NDFIP1, VDR, TRIM32, CTSV, ING4, JUN, NFIB, BRCA2, WNT10B, XDH, WDR77, BAK1, RAPGEF1, SMAD3, SIRT6, CASP3, RBM5, TGFB1, BAP1, HRAS, F2R, MAP2K1	MTBP, NRK, NOV, PDCD10, MARCH7, LYN, STAT1, EIF2AK2, KRIT1, IFT74, NPM1, EEF1E1, PRNP, STRAP, PPP2R5C, C18orf54, NKX3-1, SH3BP4, TFAP2A, PLPP1, GREM1, HIST1H2AC, BCHE, KIFAP3, SYNJ2BP, SKAP2, PRKRA, GLMN, COPS8, NOTCH2, RBBP4, MED1, CDK6, ID2, RC3H1, VEGFC, ZEB1, RAPGEF2, CUL2, STK3, PEX2, SMAD2, BMP4, PTPRK, ASPH, SERPINF1, CDKN2B, NF1, SPRY2, GAS8, TWSG1, ROBO1, GJA1, SMAD1, KAT2B, WNT5A, FOSL1…
GO:0090342	regulation of cell aging	28	2	0.21	65	0.018	0.018	1	1	Any process that modulates the rate, frequency, or extent of cell aging. Cell aging is the progression of the cell from its inception to the end of its lifespan	0.382011	-0.377212	PNPT1, KRAS, FOXM1, LMNA	EEF1E1, CDK6, NUAK1, HMGA2
GO:0023051	regulation of signaling	1702	20	12.59	386	0.01838	0.11112	1	1	Any process that modulates the frequency, rate or extent of a signaling process	1.17437	-1.55699	LRP8, KAT6A, TMEM65, RNF6, SKP2, FGFR3, SKIL, ARHGAP18, PSMA6, KIF14, TAX1BP3, SOD2, SH3RF1, CARD9, SOCS7, ADAM9, ARHGAP35, TIAM1, BIRC6, TAF9B, PRKAA1, CHUK, KREMEN1, ATXN7, CYR61, PDE8A, TAF4, EPS8L1, PRKCE, FIGNL1, SOCS4, NDFIP2, IFNGR2, NCOA3, UBC, MC1R, RPA3, TRIO, CAMLG, LTBP1, BRCA1, RCAN3, GFI1, PIDD1, SHOC2, MYO5A, RMI1, RASSF2, IGFBP5, EGR1, SMAD4, DNA2, RAB8B, PALM3, KRAS, PTPN3, LAMTO…	ITGB1, PSMD5, ATP2C1, ZNF675, TERF2IP, ARRDC3, DVL3, LINC02210-CRHR1, NRK, PSMD12, NOV, NFE2L2, PDCD10, SLC9A6, PTPN12, SNX13, CREB1, HPSE, PFN2, TAF5, PIK3R1, RHOQ, MAP2K4, DYRK1A, ADNP, SH3BGRL, ZMYND11, PRKACB, YWHAZ, VRK2, LYN, LY96, RASGRF1, STAT1, EIF2AK2, LPXN, DNM1L, PSMA1, RASA1, ARHGAP5, UBE2N, CSNK2A2, RTN4, NCK1, SPPL2A, EIF2A, PPP1R15B, SMURF2, SNX3, SUMO1, TAF9, TRIM13, GPRC5B, PUM2…
GO:0009141	nucleoside triphosphate metabolic proces...	209	5	1.55	1057	0.0189	0.39983	1	1	The chemical reactions and pathways involving a nucleoside triphosphate, a compound consisting of a nucleobase linked to a deoxyribose or ribose sugar esterified with triphosphate on the sugar	0.69927	-0.925725	UQCRHL, PRKAA1, NDUFA11, FIGNL1, NDUFA2, DCTPP1, NDUFB2, MECP2, PFKFB4, NME3, CDK1, UQCC2, PARG, FLCN, SAMHD1, NDUFB6, NDUFA9, HIF1A, UQCRQ, COX10, TSPO, ITPA, UCK1, IMPDH1, SIRT6, TGFB1, TAZ	ATP5F1EP2, RHOQ, UQCRB, DNM1L, MSH2, NDUFS1, AP003108.2, ATP5F1C, MOCS2, MBIP, PMPCB, NDUFA12, AK3, CMPK1, TBPL1, RRM2B, BPGM, CTPS1, NFS1, GAPDH, HSPA8, NDUFB1, SLC25A13, SMPDL3A, NDUFA6, AK9
GO:2001234	negative regulation of apoptotic signali...	139	4	1.03	66	0.01929	0.01929	1	1	Any process that stops, prevents or reduces the frequency, rate or extent of apoptotic signaling pathway	0.727214	-0.810058	SOD2, SH3RF1, BIRC6, TAF9B, FIGNL1, BRCA1, TGFBR1, SLC35F6, OPA1, LMNA, CTTN, HIF1A, MUC1, HTT, TRIM32, TRADD	NFE2L2, ZMYND11, TAF9, HSPH1, IVNS1ABP, TPT1, LGALS3, DNAJA1, MEIS3, EYA4, USP47, PHIP, YAP1, RPS6KB1, NONO, RRM2B, STRADB, BMP4, TRIAP1, PTTG1IP, TXNDC12, SRC
GO:0032873	negative regulation of stress-activated ...	30	2	0.22	67	0.02052	0.02052	1	1	Any process that stops, prevents, or reduces the frequency, rate or extent of signal transduction mediated by the stress-activated MAPK cascade	0.26871	-0.746745	DUSP10, FOXM1, EZR	ZNF675, ZMYND11, HSPH1, AIDA, HIPK3, DNAJA1, GPS2, TAOK3
GO:0070303	negative regulation of stress-activated ...	30	2	0.22	68	0.02052	0.02052	1	1	Any process that stops, prevents, or reduces the frequency, rate or extent of signaling via the stress-activated protein kinase signaling cascade	0.26871	-0.746745	DUSP10, FOXM1, EZR	ZNF675, ZMYND11, HSPH1, AIDA, HIPK3, DNAJA1, GPS2, TAOK3
GO:0097306	cellular response to alcohol	30	2	0.22	69	0.02052	0.02052	1	1	Any process that results in a change in state or activity of a cell (in terms of movement, secretion, enzyme production, gene expression, etc.) as a result of an alcohol stimulus	0.593653	-0.0827933	LRP8, PRKAA1, PRKCE, BRCA1, HMGCS1, AKAP8
GO:0031398	positive regulation of protein ubiquitin...	143	4	1.06	70	0.02117	0.02117	1	1	Any process that activates or increases the frequency, rate or extent of the addition of ubiquitin groups to a protein	0.77382	-1.08799	SKP2, PSMA6, ANAPC7, CDK9, NDFIP2, UBC, BRCA1, XIAP, CDK1, ANAPC11, ANAPC2, CCDC22, BMI1, SPHK1, RASSF5, NDFIP1, RPS27A, GORASP1, HSPA5	PSMD5, ARRDC3, PSMD12, PSMA1, ANAPC10, DCUN1D5, UBE2N, PSMC6, TOPORS, CDC23, PSMA4, UBE3A, RAB1A, DERL1, DCUN1D4, FKBP1A, RNF20, PSMD14, PSMD6, UBE2E1, CDC27, RIPK2, PTTG1IP, PSMD7
GO:0030520	intracellular estrogen receptor signalin...	31	2	0.23	71	0.02183	0.02183	1	1	Any series of molecular signals generated as a consequence of an intracellular estrogen receptor binding to one of its physiological ligands. The pathway begins with receptor-ligand binding, and ends with regulation of a downstream cellular process (e.g. transcription)	0.414011	-0.538781	SKP2, EGLN2, BRCA1	UBA5, DDX5, ISL1, DDX17, MED1, CNOT2, CNOT1, SRC
GO:0007185	transmembrane receptor protein tyrosine ...	3	1	0.02	72	0.02204	0.02204	1	1	A series of molecular signals initiated by the binding of an extracellular ligand to a receptor on the surface of the target cell where the receptor possesses protein tyrosine phosphatase activity, and ending with regulation of a downstream cellular process, e.g. transcription	0.379414	0.379414	TRIO
GO:0014012	peripheral nervous system axon regenerat...	3	1	0.02	1793	0.02204	1	1	1	The regrowth of axons outside the central nervous system (outside the brain and spinal cord) following an axonal injury	0.553141	0.553141	CERS2, TSPO
GO:0021548	pons development	3	1	0.02	73	0.02204	0.02204	1	1	The process whose specific outcome is the progression of the pons over time, from its formation to the mature structure. The pons lies above the medulla and next to the cerebellum. The pons conveys information about movement from the cerebral hemisphere to the cerebellum	0.0597646	0.0597646	SCRIB, UQCRQ	SEC24B
GO:0022614	membrane to membrane docking	3	1	0.02	74	0.02204	0.02204	1	1	The initial attachment of a membrane to a target membrane, mediated by proteins protruding from the two membranes. Docking requires only that the membranes come close enough for the proteins to interact and adhere	0.0718314	0.0718314	EZR
GO:0030950	establishment or maintenance of actin cy...	3	1	0.02	75	0.02204	0.02204	1	1	Any cellular process that results in the specification, formation or maintenance of polarized actin-based cytoskeletal structures	0.48313	0.48313	ARHGAP35, RICTOR
GO:0030951	establishment or maintenance of microtub...	3	1	0.02	76	0.02204	0.02204	1	1	Any cellular process that results in the specification, formation or maintenance of polarized microtubule-based cytoskeletal structures	0.123733	0.123733	LMNA
GO:0031509	telomeric heterochromatin assembly	3	1	0.02	77	0.02204	0.02204	1	1	The assembly of chromatin into heterochromatin at the telomere	0.456488	0.456488	H3F3A, SIRT6
GO:0032532	regulation of microvillus length	3	1	0.02	78	0.02204	0.02204	1	1	A process that modulates the length of a microvillus	0.0847948	0.0847948	EZR
GO:0032536	regulation of cell projection size	3	1	0.02	79	0.02204	0.02204	1	1	A process that modulates the size of a cell projection	0.0847948	0.0847948	EZR
GO:0038026	reelin-mediated signaling pathway	3	1	0.02	80	0.02204	0.02204	1	1	A series of molecular signals initiated by the binding of reelin (a secreted glycoprotein) to a receptor on the surface of a target cell, and ending with regulation of a downstream cellular process, e.g. transcription	0.389512	0.389512	LRP8	VLDLR
GO:0043622	cortical microtubule organization	3	1	0.02	81	0.02204	0.02204	1	1	A process that is carried out at the cellular level which results in the assembly, arrangement of constituent parts, or disassembly of structures formed of microtubules and associated proteins in the cell cortex, i.e. just beneath the plasma membrane of a cell	0.101147	0.101147	EZR
GO:0060591	chondroblast differentiation	3	1	0.02	82	0.02204	0.02204	1	1	The process in which a mesenchymal cell, acquires specialized structural and/or functional features of a chondroblast. Differentiation includes the processes involved in commitment of a cell to a chondroblast fate. A chondroblast is a precursor cell to chondrocytes	0.269323	0.269323	CYR61
GO:0060710	chorio-allantoic fusion	3	1	0.02	83	0.02204	0.02204	1	1	The cell-cell adhesion process in which the cells of the chorion fuse to the cells of the allantois	-0.00864474	-0.00864474	CYR61	ZFP36L1
GO:1902965	regulation of protein localization to ea...	3	1	0.02	84	0.02204	0.02204	1	1	Any process that modulates the frequency, rate or extent of protein localization to early endosome	0.25522	0.25522	RDX, EZR
GO:1902966	positive regulation of protein localizat...	3	1	0.02	85	0.02204	0.02204	1	1	Any process that activates or increases the frequency, rate or extent of protein localization to early endosome	0.25522	0.25522	RDX, EZR
GO:1903753	negative regulation of p38MAPK cascade	3	1	0.02	86	0.02204	0.02204	1	1		-0.0924442	-0.0924442	EZR	HSPH1
GO:1905666	regulation of protein localization to en...	3	1	0.02	87	0.02204	0.02204	1	1		0.25522	0.25522	RDX, EZR
GO:1905668	positive regulation of protein localizat...	3	1	0.02	88	0.02204	0.02204	1	1		0.25522	0.25522	RDX, EZR
GO:0034655	nucleobase-containing compound catabolic...	297	6	2.2	1794	0.02204	1	1	1	The chemical reactions and pathways resulting in the breakdown of nucleobases, nucleosides, nucleotides and nucleic acids	0.757411	-1.26601	EXOSC6, PNPT1, PDE8A, RPSA, POP1, RPL31, DNA2, TNRC6B, DCTPP1, RPS10, DDX6, RPS21, RPS19, ZHX2, RPL41, LSM5, EDC3, RPL21, RPS29, RPS8, RPL10, SAMHD1, RPS12, RPL35A, THRAP3, RPL37A, PDE7A, DPYD, RPS27A, NUDT18, ITPA, RPS23, RPL34, XDH, AGO2, KPNA1, RPLP2, CASP3, NEIL2, NT5C3A	RPL39, MTREX, GSPT1, RNASEH2B, EIF3E, TENT2, DIS3, PAIP1, GSPT2, RPL15, TATDN1, UPF2, TTC37, EXOSC3, DDX5, LSM1, HNRNPR, PPP2R2A, RPL36A, FMR1, ZC3HAV1, SSB, UNG, PATL1, EIF4B, EIF4E, SETMAR, PNRC2, CNOT2, RPL17-C18orf32, HPRT1, RC3H1, ERN1, NT5E, RPL17, RPL9, CNOT1, SUPV3L1, MBD4, NUDT12, EXOSC9, HBS1L, EIF4A2, PABPC1, DEDD2, OGG1, ZFP36L1, SMPDL3A, HNRNPD, SMG8, EGLN1, APOBEC3C
GO:0045333	cellular respiration	145	4	1.07	746	0.02215	0.24208	1	1	The enzymatic release of energy from inorganic and organic compounds (especially carbohydrates and fats) which either requires oxygen (aerobic respiration) or does not (anaerobic respiration)	0.691701	-0.723331	PNPT1, D2HGDH, UQCRHL, NDUFA11, NDUFA2, NDUFB2, MECP2, CDK1, NDUFB6, NDUFA9, HIF1A, UQCRQ, COX10, TAZ	UQCRB, FASTKD3, NDUFS1, ALDH5A1, AP003108.2, PMPCB, IDH3A, NDUFA12, PDHB, NOA1, ETFDH, NNT, NDUFB1, FASTKD2, SLC25A13, NDUFA6, PANK2
GO:0010558	negative regulation of macromolecule bio...	861	12	6.37	89	0.02244	0.02244	1	1	Any process that decreases the rate, frequency or extent of the chemical reactions and pathways resulting in the formation of a macromolecule, any molecule of high relative molecular mass, the structure of which essentially comprises the multiple repetition of units derived, actually or conceptually, from molecules of low relative molecular mass	1.07984	-1.45612	LRP8, KAT6A, SKIL, KLF12, NPAT, H3F3A, C1D, MEX3D, TOB2, ZBTB18, CDYL, ARHGAP35, CREBZF, TAF9B, KLF16, AHR, HMG20A, HES6, UBC, BAHD1, CCAR1, BRCA1, GFI1, TBX2, GON4L, RTF1, IGFBP5, EGR1, SMAD4, TNRC6B, PPM1F, ATOH8, MECP2, CBX6, MDM4, SUV39H2, KAT6B, TSC22D3, GSK3B, LGR4, SUFU, THRA, SCMH1, SUPT6H, TNRC18, JARID2, FNIP1, SBNO2, ZHX2, MPHOSPH8, NKX3-2, NR1D2, GATA2, FOXO3, FOXM1, DAPK3, FLCN, RPL1…	FAM220A, ZNF675, HAT1, THRB, UBE2D3, EPC1, RNF2, EIF3E, CREB1, SIN3A, ITM2B, ZMYND11, ZNF224, ZBTB1, BAZ2A, IRF2, NFIL3, KDM5A, STAT1, EIF2AK2, AKIRIN2, ZNF567, BTAF1, EED, COPS2, TMEM59, GLIS3, IKZF4, NCK1, SMURF2, UBA3, SUMO1, RBAK, ZBTB33, TRIM13, ZNF85, IREB2, PUM2, AEBP2, BASP1, AC068234.1, NR2C1, CAPRIN1, WWP1, STRAP, EGFR, CHCHD3, NKX3-1, NFE2L3, DR1, DDX5, ZBTB38, MTERF3, ZNF189, CGGBP1, …
GO:0033108	mitochondrial respiratory chain complex ...	82	3	0.61	90	0.02261	0.02261	1	1	The aggregation, arrangement and bonding together of a set of components to form a mitochondrial respiratory chain complex	0.575066	-0.605119	NDUFA11, PET100, NDUFA2, NDUFB2, UQCC2, COX14, NDUFB6, NDUFA9, NDUFAF4, TAZ	UQCRB, NDUFS1, AP003108.2, NDUFA12, NDUFAF6, SDHAF3, NUBPL, NDUFB1, NDUFA6
GO:0046467	membrane lipid biosynthetic process	83	3	0.61	1795	0.02333	1	1	1	The chemical reactions and pathways resulting in the formation of membrane lipids, any lipid found in or associated with a biological membrane	0.633028	-0.652387	CERS2, PRKAA1, CYR61, DEGS1, ST3GAL5, PIGW, SPHK1, CSNK1G2, ORMDL3, ALDH3A2, A4GALT	PRKD3, PIGC, VAPA, PLPP1, DPM1, SPTSSA, PIGP, PIGU, CERKL, HACD2, PIGS, AGK, SAMD8
GO:0000209	protein polyubiquitination	221	5	1.64	91	0.02342	0.02342	1	1	Addition of multiple ubiquitin groups to a protein, forming a ubiquitin chain	0.887504	-1.09553	UNKL, RNF6, SKP2, PSMA6, ANAPC7, UBC, BRCA1, TRIM5, RNF166, RC3H2, LNPEP, CBL, FBXL19, XIAP, FBXO31, ANAPC11, ANAPC2, UBR2, AMFR, DTX3L, BFAR, TRIM32, SIAH1, RPS27A, RNF114	PSMD5, UBE2D3, PSMD12, PSMA1, ANAPC10, UBE2N, SMURF2, NPEPPS, PSMC6, TRIM36, TOPORS, CDC23, PSMA4, UBE3A, UBE2Q2, FBXL5, CBFB, KLHL20, UBE2A, ANAPC13, HERC6, HACE1, RNF20, DTL, PSMD14, RNF14, UBE2E2, ARIH1, TRIP12, PSMD6, C18orf25, UBE2E1, CDC27, RBBP6, TRIM21, PSMD7, UBE2E3, HLTF, FBXW8
GO:0016579	protein deubiquitination	221	5	1.64	92	0.02342	0.02342	1	1	The removal of one or more ubiquitin groups from a protein	0.802112	-1.18958	SKP2, PSMA6, TAF9B, ATXN7, UBC, BRCA1, MINDY1, SMAD4, RNF135, MDM4, BABAM1, CCP110, TGFBR1, STAM, NLRP3, KDM1B, USP37, HIF1A, USP53, MAVS, FOXK2, OTUD4, RPS27A, USP3, CYLD, IKBKG, SMAD3, ATXN7L3, STAM2, BAP1, SHMT2, TNIP1	PSMD5, SUPT3H, UCHL5, PSMD12, USP25, ABRAXAS2, USP14, PSMA1, TOMM20, SMURF2, SNX3, PSMC6, ABRAXAS1, PSMA4, USP47, PSMD14, USP48, CLSPN, USP16, PSMD6, SMAD2, ZRANB1, STAMBP, RIPK2, MINDY3, SMAD1, KAT2B, TRIM21, UCHL3, BRCC3, PSMD7, ACTL6A, BECN1
GO:0090150	establishment of protein localization to...	302	6	2.23	1585	0.0237	0.76868	1	1	The directed movement of a protein to a specific location in a membrane	0.772175	-1.29316	FAM126A, RPSA, RPL31, RAB26, RAB8B, RPS10, RPS21, CDH2, EFR3A, RPS19, RPL41, RPL21, RPS29, RPS8, RPL10, RPS12, RPL35A, TOMM7, PPP2R5A, SCRIB, ARHGAP44, ARF6, RPL37A, RER1, PPP3R1, MIEF1, RDX, PKDCC, MPP5, CNST, RPS27A, EZR, RPS23, RPL34, MIEF2, KIF13A, PEX5, YWHAG, RAB3GAP2, ATG4B, RPLP2, PACS2, TSPAN14, RAB3GAP1	ITGB1, SRP19, RPL39, LYPLA1, PIK3R1, RHOQ, RPL15, YWHAZ, HSP90AA1, TMEM59, PEX3, NUP54, RAB11A, PRNP, SDCBP, CALM2, YWHAH, BLZF1, EGFR, VAMP3, GOLGA7, MFF, RPL36A, SRP72, MAPK8, SRP54, SRP14, HSPA4, RAB10, RPL17-C18orf32, RPL17, RPL9, SRP9, ATG4A, MTCL1, RAB8A, RAB31, PKP2
GO:0045892	negative regulation of transcription, DN...	668	10	4.94	93	0.02389	0.02389	1	1	Any process that stops, prevents, or reduces the frequency, rate or extent of cellular DNA-templated transcription	1.04441	-1.43848	LRP8, KAT6A, SKIL, KLF12, H3F3A, C1D, ZBTB18, ARHGAP35, CREBZF, TAF9B, KLF16, AHR, HMG20A, HES6, UBC, BAHD1, BRCA1, GFI1, TBX2, GON4L, RTF1, EGR1, SMAD4, PPM1F, ATOH8, MECP2, CBX6, MDM4, SUV39H2, KAT6B, TSC22D3, LGR4, SUFU, THRA, SCMH1, SUPT6H, TNRC18, JARID2, FNIP1, SBNO2, ZHX2, MPHOSPH8, NKX3-2, NR1D2, GATA2, FOXO3, FOXM1, FLCN, RPL10, ZNF703, MAGED1, ZFHX3, POU2F1, FAM129B, UBR2, TCERG1, RBL1,…	FAM220A, ZNF675, HAT1, THRB, UBE2D3, EPC1, RNF2, CREB1, SIN3A, ZMYND11, ZNF224, ZBTB1, BAZ2A, IRF2, NFIL3, KDM5A, STAT1, AKIRIN2, ZNF567, BTAF1, EED, COPS2, GLIS3, IKZF4, NCK1, SMURF2, UBA3, SUMO1, RBAK, ZBTB33, AEBP2, BASP1, NR2C1, WWP1, STRAP, CHCHD3, NKX3-1, NFE2L3, DR1, DDX5, ZBTB38, MTERF3, ZNF189, CGGBP1, TFAP2A, ZNF93, BPTF, NR2F1, GREM1, SET, ISL1, USP47, HIST1H2AC, GPS2, RBBP8, MEIS2, TR…
GO:0071156	regulation of cell cycle arrest	84	3	0.62	94	0.02407	0.02407	1	1	Any process that modulates the rate, frequency, or extent of cell cycle arrest, the process in which the cell cycle is halted during one of the normal phases	0.661208	-0.605095	CDK9, UBC, BRCA1, PIDD1, CCNK, BIN1, MDM4, FOXM1, CDK1, TFAP4, MUC1, CHEK2, RBL2, RPS27A, TGFB1	PCNA, NPM1, SETMAR, CASP2, ID2, CNOT2, CNOT1, TRIAP1, HMGA2, MED25
GO:0006296	nucleotide-excision repair, DNA incision...	33	2	0.24	95	0.02456	0.02456	1	1	The endonucleolytic cleavage of the damaged strand of DNA 5' to the site of damage. The incision occurs at the junction of single-stranded DNA and double-stranded DNA that is formed when the DNA duplex is unwound. The incision follows the incision formed 3' to the site of damage	0.515623	-0.402164	GTF2H3, UBC, RPA3, RFC1, RPS27A, GTF2H2	PCNA, RFC4, GTF2H1
GO:0006805	xenobiotic metabolic process	33	2	0.24	96	0.02456	0.02456	1	1	The chemical reactions and pathways involving a xenobiotic compound, a compound foreign to living organisms. Used of chemical compounds, e.g. a xenobiotic chemical, such as a pesticide	0.349366	-0.448573	AHR, CYB5B, GSTO1	PTGES3, GSTM4, MGST1, CMBL, ACSL1
GO:0031572	G2 DNA damage checkpoint	33	2	0.24	97	0.02456	0.02456	1	1	A cell cycle checkpoint that detects and negatively regulates progression from G2 to M phase in the cell cycle in response to DNA damage	0.421418	-0.611804	BRCA1, BABAM1, CDK1, FOXN3, RINT1	SYF2, TOPBP1, ABRAXAS1, RBBP8, DTL, CLSPN, TAOK3, HMGA2, BRCC3
GO:0033692	cellular polysaccharide biosynthetic pro...	33	2	0.24	660	0.02456	0.20893	1	1	The chemical reactions and pathways resulting in the formation of polysaccharides, polymers of many (typically more than 10) monosaccharide residues linked glycosidically, occurring at the level of an individual cell	0.558783	-0.420188	PPP1R3D, CSGALNACT2, UBC, GSK3B, B4GAT1, RPS27A, IRS1, PPP1CB	UGP2, GYG1, HAS2
GO:0006401	RNA catabolic process	225	5	1.66	1796	0.02507	1	1	1	The chemical reactions and pathways resulting in the breakdown of RNA, ribonucleic acid, one of the two main type of nucleic acid, consisting of a long, unbranched macromolecule formed from ribonucleotides joined in 3',5'-phosphodiester linkage	0.742402	-1.26601	EXOSC6, PNPT1, RPSA, POP1, RPL31, DNA2, TNRC6B, RPS10, DDX6, RPS21, RPS19, ZHX2, RPL41, LSM5, EDC3, RPL21, RPS29, RPS8, RPL10, RPS12, RPL35A, THRAP3, RPL37A, RPS27A, RPS23, RPL34, AGO2, RPLP2	RPL39, MTREX, GSPT1, RNASEH2B, EIF3E, TENT2, DIS3, PAIP1, GSPT2, RPL15, UPF2, TTC37, EXOSC3, DDX5, LSM1, HNRNPR, PPP2R2A, RPL36A, FMR1, ZC3HAV1, SSB, PATL1, EIF4B, EIF4E, PNRC2, CNOT2, RPL17-C18orf32, RC3H1, ERN1, RPL17, RPL9, CNOT1, SUPV3L1, EXOSC9, HBS1L, EIF4A2, PABPC1, DEDD2, ZFP36L1, HNRNPD, SMG8
GO:0009968	negative regulation of signal transducti...	674	10	4.99	98	0.02524	0.02524	1	1	Any process that stops, prevents, or reduces the frequency, rate or extent of signal transduction	0.946595	-1.42229	SKIL, PSMA6, TAX1BP3, SOD2, SH3RF1, SOCS7, ARHGAP35, BIRC6, TAF9B, PRKAA1, KREMEN1, ATXN7, FIGNL1, SOCS4, UBC, LTBP1, BRCA1, RASSF2, IGFBP5, EGR1, SMAD4, PALM3, PTPN3, CDH2, GSK3B, LGR4, SUFU, LEMD3, PREX1, FNIP1, CBL, DUSP10, TGFBR1, GATA2, FOXO3, FOXM1, STAM, PLCL2, NLRP3, SLC35F6, FLCN, OPA1, LEPROT, S1PR2, FAM129B, PTPRJ, UBR2, ASH1L, LMNA, NPHP4, IFT122, NOTCH1, CTTN, TLE1, HIF1A, ATF3, MUC1…	ITGB1, PSMD5, ZNF675, DVL3, PSMD12, NOV, NFE2L2, PTPN12, SNX13, DYRK1A, ZMYND11, PRKACB, LYN, LY96, STAT1, LPXN, PSMA1, RASA1, NCK1, PPP1R15B, SMURF2, TAF9, PSMC6, PRNP, PDGFRA, BICC1, PIAS2, HSPH1, CALM2, PAK1IP1, STRAP, PSMA4, IVNS1ABP, EGFR, AIDA, AP003108.2, GRB14, NKX3-1, HIPK3, SH3BP4, TPT1, LATS2, LGALS3, DNAJA1, GREM1, MBIP, LMBRD1, MEIS3, EYA4, ISL1, USP47, GPS2, SCYL2, TRIM33, ATP2B4, S…
GO:0021954	central nervous system neuron developmen...	34	2	0.25	99	0.02597	0.02597	1	1	The process whose specific outcome is the progression of a neuron whose cell body is located in the central nervous system, from initial commitment of the cell to a neuronal fate, to the fully functional differentiated neuron	0.428446	-0.394612	ARHGAP35, GATA2, UQCRQ, SZT2, NFIB	HPRT1, RAPGEF2, ROBO1, FBXO45, WNT5A
GO:0042769	DNA damage response, detection of DNA da...	34	2	0.25	100	0.02597	0.02597	1	1	The series of events required to receive a stimulus indicating DNA damage has occurred and convert it to a molecular signal	0.442146	-0.539014	UBC, RPA3, RFC1, RPS27A	PCNA, RFC4, DNAJA1, MRPS9, DTL, HMGA2
GO:0023052	signaling	2861	29	21.17	952	0.02726	0.35004	1	1	The entirety of a process in which information is transmitted within a biological system. This process begins with an active signal and ends when a cellular response has been triggered	1.40242	-1.67632	SPNS2, FAM126A, ADAMTS1, AKAP10, LRP8, KAT6A, LRRC40, AL928654.3, TMEM65, RNF6, INPP4B, SKP2, FGFR3, SKIL, ARHGAP18, PSMA6, KIF14, GPC2, EGLN2, TAX1BP3, SNAP29, SOD2, SH3RF1, CNPY2, CARD9, SOCS7, TOB2, TSPAN9, ADAM9, POFUT1, ARHGAP35, TIAM1, SMAD5, BIRC6, SYTL3, RXRB, SLC12A2, TAF9B, FCHSD2, PRKAA1, KLF16, CHUK, LIN7C, KREMEN1, DTX4, ATXN7, DOCK1, CYR61, PDE8A, AHR, ARPC1B, TAF4, EPS8L1, TIE1, PR…	ITGB1, GEM, PSMD5, ATP2C1, ZNF675, ASB3, PPT1, THRB, UBE2D3, TERF2IP, ARRDC3, XPR1, DVL3, PLPP5, LINC02210-CRHR1, SNRK, NRK, SEC31A, PSMD12, NOV, NFE2L2, PDCD10, SLC9A6, PTPN12, SNX13, CREB1, HPSE, PFN2, TAF5, ARPC5, KIAA0586, PIK3R1, RHOQ, MAP2K4, PRKD3, INTS6, DYRK1A, DST, CPE, ADNP, SH3BGRL, ZMYND11, ITGB3BP, ASB14, MBTPS2, GNG5, PCNA, PRKACB, YWHAZ, VRK2, HSP90AA1, IRF2, FMN2, LYN, TMF1, LY96…
GO:0031327	negative regulation of cellular biosynth...	886	12	6.56	101	0.02739	0.02739	1	1	Any process that stops, prevents, or reduces the frequency, rate or extent of the chemical reactions and pathways resulting in the formation of substances, carried out by individual cells	1.07984	-1.45612	LRP8, KAT6A, SKIL, KLF12, NPAT, H3F3A, C1D, MEX3D, TOB2, ZBTB18, CDYL, ARHGAP35, CREBZF, TAF9B, PRKAA1, KLF16, AHR, HMG20A, HES6, UBC, BAHD1, CCAR1, BRCA1, GFI1, TBX2, GON4L, RTF1, IGFBP5, EGR1, SMAD4, TNRC6B, PPM1F, ATOH8, MECP2, CBX6, MDM4, SUV39H2, KAT6B, TSC22D3, GSK3B, LGR4, SUFU, THRA, SCMH1, SUPT6H, TNRC18, JARID2, FNIP1, SBNO2, ZHX2, MPHOSPH8, NKX3-2, NR1D2, GATA2, FOXO3, FOXM1, DAPK3, FL…	FAM220A, ZNF675, HAT1, THRB, UBE2D3, EPC1, RNF2, EIF3E, CREB1, SIN3A, ITM2B, ZMYND11, ZNF224, ZBTB1, BAZ2A, IRF2, NFIL3, KDM5A, STAT1, EIF2AK2, AKIRIN2, ZNF567, BTAF1, EED, COPS2, TMEM59, GLIS3, IKZF4, NCK1, SMURF2, UBA3, SUMO1, RBAK, ZBTB33, TRIM13, ZNF85, IREB2, PUM2, AEBP2, BASP1, NR2C1, CAPRIN1, WWP1, STRAP, EGFR, CHCHD3, NKX3-1, NFE2L3, DR1, DDX5, ZBTB38, MTERF3, ZNF189, CGGBP1, HNRNPR, TFAP…
GO:0019985	translesion synthesis	35	2	0.26	1797	0.02741	1	1	1	The replication of damaged DNA by synthesis across a lesion in the template strand; a specialized DNA polymerase or replication complex inserts a defined nucleotide across from the lesion which allows DNA synthesis to continue beyond the lesion. This process can be mutagenic depending on the damaged nucleotide and the inserted nucleotide	0.440005	-0.670774	UBC, RPA3, RFC1, RPS27A	POLE2, ZBTB1, PCNA, RFC4, DTL, PRIMPOL
GO:0033683	nucleotide-excision repair, DNA incision	35	2	0.26	102	0.02741	0.02741	1	1	A process that results in the endonucleolytic cleavage of the damaged strand of DNA. The incision occurs at the junction of single-stranded DNA and double-stranded DNA that is formed when the DNA duplex is unwound	0.515623	-0.448909	GTF2H3, UBC, RPA3, RFC1, RPS27A, GTF2H2	PCNA, RFC4, GTF2H1, OGG1
GO:0006364	rRNA processing	231	5	1.71	686	0.02769	0.21483	1	1	Any process involved in the conversion of a primary ribosomal RNA (rRNA) transcript into one or more mature rRNA molecules	0.714601	-1.1431	C1D, EXOSC6, RPSA, RPL31, RPS10, NSUN5P1, RPS21, RPS19, RPL41, RPL21, DHX37, RPS29, RPS8, RPL10, RPS12, RPL35A, FCF1, UTP11, RPL37A, NSUN5, RIOK2, RPS27A, NPM3, RRNAD1, RPS23, RPL34, RPLP2	RPL39, MTREX, RPF1, DIS3, MPHOSPH10, UTP3, RPL15, MRPL1, WDR75, DDX21, NOP58, SBDS, RRP15, HEATR1, EXOSC3, TRMT61B, RPL36A, THUMPD1, MRPS9, MAK16, UTP4, RPL17-C18orf32, FRG1, RPL17, RPL9, IMP4, NOL11, UTP15, EXOSC9, LTV1, RRP7BP
GO:0046700	heterocycle catabolic process	314	6	2.32	1798	0.02802	1	1	1	The chemical reactions and pathways resulting in the breakdown of heterocyclic compounds, those with a cyclic molecular structure and at least two different atoms in the ring (or rings)	0.779953	-1.26601	EXOSC6, PNPT1, FTCD, PDE8A, RPSA, POP1, RPL31, DNA2, TNRC6B, DCTPP1, RPS10, DDX6, RPS21, RPS19, ZHX2, RPL41, LSM5, EDC3, RPL21, RPS29, RPS8, RPL10, SAMHD1, RPS12, RPL35A, THRAP3, RPL37A, PDE7A, DPYD, RPS27A, NUDT18, ITPA, CARNMT1, RPS23, RPL34, XDH, AGO2, KPNA1, RPLP2, CASP3, NEIL2, NT5C3A	RPL39, MTREX, GSPT1, RNASEH2B, EIF3E, TENT2, DIS3, PAIP1, GSPT2, RPL15, TATDN1, HNMT, UPF2, TTC37, EXOSC3, DDX5, LSM1, HNRNPR, PPP2R2A, RPL36A, FMR1, ZC3HAV1, SSB, UNG, PATL1, EIF4B, EIF4E, SETMAR, PNRC2, CNOT2, RPL17-C18orf32, HPRT1, RC3H1, ERN1, NT5E, RPL17, RPL9, CNOT1, SUPV3L1, MBD4, NUDT12, EXOSC9, HBS1L, EIF4A2, PABPC1, DEDD2, OGG1, ZFP36L1, SMPDL3A, HNRNPD, SMG8, EGLN1, APOBEC3C
GO:0006302	double-strand break repair	156	4	1.15	103	0.02804	0.02804	1	1	The repair of double-strand breaks in DNA via homologous and nonhomologous mechanisms to reform a continuous DNA helix	0.725629	-0.991685	PPP4R2, FIGNL1, RPA3, BRCA1, ESCO2, GEN1, DNA2, DCLRE1B, REC8, PARPBP, BABAM1, FOXM1, CHEK2, DTX3L, HUS1, BRCA2, SIRT6	TERF2IP, SMC6, DCLRE1C, HELQ, UBE2N, MSH2, SUMO1, ZFYVE26, ABRAXAS1, EXD2, MND1, RBBP8, TDP2, RAD52, CDC7, SETMAR, PSMD14, TRIP12, SLF1, SMARCAD1, POLM, HMGA2, OGG1, SLX4, ATP23, POLA1, BRCC3
GO:0045944	positive regulation of transcription fro...	588	9	4.35	211	0.02809	0.0617	1	1	Any process that activates or increases the frequency, rate or extent of transcription from an RNA polymerase II promoter	0.948831	-1.23844	KLF6, FOSL2, KLF12, HOXC13, SMAD5, RXRB, TAF9B, CHUK, ATXN7, CYR61, AHR, TAF4, CDK9, NCOA3, UBC, MC1R, CHD6, BRCA1, RTF1, CDK8, CCNK, EGR1, SMAD4, KPNA6, ZNF593, TEF, MEF2D, KAT6B, GSK3B, THRA, SUPT6H, RNF10, GATA2, FOXO3, FOXM1, TOP2A, CASK, NLRP3, FLCN, POU2F1, AAMDC, ASH1L, LMNA, RBL1, TFAP4, NOTCH1, HIF1A, ATF3, MUC1, THRAP3, RUNX1, WDR5, PPP3R1, VDR, MAVS, FOXK2, HHEX, RPS27A, STAT5B, PITX1,…	THRB, EPC1, NFE2L2, MED21, YEATS4, CREB1, SIN3A, E2F5, PIK3R1, RHOQ, MBTPS2, IRF2, STAT1, AKIRIN2, ZNF567, LUM, RLF, GLIS3, IFT74, IKZF4, NCK1, EIF2A, NPM1, TAF9, PSMC6, TCF12, NAMPT, GTF2F2, DHX36, PIAS2, HSPH1, MKL2, ARID4B, PCGF5, MNAT1, UBE3A, EGFR, RTRAF, GTF2H1, NKX3-1, CKAP2, CBFB, CCNH, DDX5, ZBTB38, TFAP2A, CEBPZ, NR2F1, GREM1, MEIS3, ISL1, SUMO2, PLAC8, CAMTA2, MEIS2, ARF4, SP3, NCOA7, …
GO:0044270	cellular nitrogen compound catabolic pro...	315	6	2.33	1799	0.0284	1	1	1	The chemical reactions and pathways resulting in the breakdown of organic and inorganic nitrogenous compounds	0.779953	-1.26601	EXOSC6, PNPT1, FTCD, PDE8A, RPSA, POP1, RPL31, DNA2, TNRC6B, DCTPP1, RPS10, DDX6, RPS21, RPS19, ZHX2, RPL41, LSM5, EDC3, RPL21, RPS29, RPS8, RPL10, SAMHD1, RPS12, RPL35A, THRAP3, TST, RPL37A, PDE7A, DPYD, RPS27A, NUDT18, ITPA, CARNMT1, RPS23, RPL34, XDH, AGO2, KPNA1, RPLP2, CASP3, NEIL2, NT5C3A	RPL39, MTREX, GSPT1, RNASEH2B, EIF3E, TENT2, DIS3, PAIP1, GSPT2, RPL15, TATDN1, HNMT, UPF2, TTC37, EXOSC3, DDX5, LSM1, HNRNPR, PPP2R2A, RPL36A, FMR1, ZC3HAV1, SSB, UNG, PATL1, EIF4B, EIF4E, SETMAR, PNRC2, CNOT2, RPL17-C18orf32, HPRT1, RC3H1, ERN1, NT5E, RPL17, RPL9, CNOT1, SUPV3L1, MBD4, NUDT12, EXOSC9, HBS1L, EIF4A2, PABPC1, DEDD2, OGG1, ZFP36L1, SMPDL3A, HNRNPD, SMG8, EGLN1, APOBEC3C
GO:1903322	positive regulation of protein modificat...	157	4	1.16	104	0.02862	0.02862	1	1	Any process that activates or increases the frequency, rate or extent of protein modification by small protein conjugation or removal	0.77382	-1.08799	SKP2, PSMA6, ANAPC7, CDK9, NDFIP2, UBC, BRCA1, XIAP, CDK1, ANAPC11, ANAPC2, CCDC22, BMI1, SPHK1, RASSF5, NDFIP1, RPS27A, GORASP1, HSPA5	PSMD5, ARRDC3, PSMD12, PSMA1, ANAPC10, DCUN1D5, UBE2N, PSMC6, TOPORS, CDC23, PSMA4, UBE3A, RAB1A, DERL1, DCUN1D4, FKBP1A, RNF20, PSMD14, PSMD6, UBE2E1, CDC27, RIPK2, PTTG1IP, PSMD7
GO:0007154	cell communication	2872	29	21.25	975	0.02869	0.35788	1	1	Any process that mediates interactions between a cell and its surroundings. Encompasses interactions such as signaling or attachment between one cell and another cell, between a cell and an extracellular matrix, or between a cell and any other aspect of its environment	1.3983	-1.67632	SPNS2, FAM126A, ADAMTS1, AKAP10, LRP8, KAT6A, LRRC40, AL928654.3, RNF6, INPP4B, SKP2, FGFR3, SKIL, ARHGAP18, PSMA6, KIF14, GPC2, EGLN2, TAX1BP3, SNAP29, SOD2, SH3RF1, CNPY2, CARD9, SOCS7, TSPAN9, ADAM9, POFUT1, ARHGAP35, TIAM1, SMAD5, BIRC6, SYTL3, RXRB, SLC12A2, TAF9B, FCHSD2, PRKAA1, KLF16, CHUK, LIN7C, KREMEN1, DTX4, ATXN7, DOCK1, CYR61, PDE8A, AHR, ARPC1B, TAF4, EPS8L1, TIE1, PRKCE, LIMK2, FI…	ITGB1, GEM, PSMD5, ATP2C1, ZNF675, ASB3, PPT1, THRB, UBE2D3, TERF2IP, ARRDC3, XPR1, DVL3, PLPP5, LINC02210-CRHR1, SNRK, NRK, SEC31A, PSMD12, NOV, NFE2L2, PDCD10, SLC9A6, PTPN12, SNX13, CREB1, HPSE, PFN2, TAF5, ARPC5, KIAA0586, PIK3R1, RHOQ, MAP2K4, PRKD3, INTS6, DYRK1A, DST, CPE, ADNP, SH3BGRL, ZMYND11, ITGB3BP, ASB14, MBTPS2, GNG5, PCNA, PRKACB, YWHAZ, VRK2, HSP90AA1, IRF2, FMN2, LYN, TMF1, LY96…
GO:0030330	DNA damage response, signal transduction...	90	3	0.67	1095	0.02877	0.42305	1	1	A cascade of processes induced by the cell cycle regulator phosphoprotein p53, or an equivalent protein, in response to the detection of DNA damage	0.606076	-0.714338	UBC, BRCA1, PIDD1, MDM4, FOXO3, FOXM1, CDK1, TFAP4, MUC1, CHEK2, RBL2, RPS27A, ING4, BRCA2	DYRK1A, PCNA, NPM1, EEF1E1, DDX5, CASP2, CNOT2, CNOT1, TRIAP1, PTTG1IP
GO:0002011	morphogenesis of an epithelial sheet	36	2	0.27	105	0.02889	0.02889	1	1	The process in which the anatomical structures of an epithelial sheet are generated and organized. An epithelial sheet is a flat surface consisting of closely packed epithelial cells	0.503109	-0.360788	ARHGAP35, LIN7C, CYR61, NOTCH1, MPP5	PDCD10, TMEFF2, WNT5A
GO:0071466	cellular response to xenobiotic stimulus	36	2	0.27	106	0.02889	0.02889	1	1	Any process that results in a change in state or activity of a cell (in terms of movement, secretion, enzyme production, gene expression, etc.) as a result of a xenobiotic compound stimulus. Xenobiotic compounds are compounds foreign to living organisms	0.365497	-0.448573	AHR, CYB5B, GSTO1	PTGES3, GSTM4, MGST1, CMBL, ACSL1
GO:0010624	regulation of Schwann cell proliferation	4	1	0.03	1800	0.02927	1	1	1	Any process that modulates the frequency or rate of multiplication or reproduction of Schwann cells, resulting in the expansion of their population. Schwann cells are a type of glial cell in the peripheral nervous system	0.541235	0.541235	CERS2, RNF10
GO:0010626	negative regulation of Schwann cell prol...	4	1	0.03	1801	0.02927	1	1	1	Any process that decreases the frequency or extent of the multiplication or reproduction of Schwann cells, resulting in the expansion of their population. Schwann cells are a type of glial cell in the peripheral nervous system	0.541235	0.541235	CERS2, RNF10
GO:0021859	pyramidal neuron differentiation	4	1	0.03	107	0.02927	0.02927	1	1	The process in which a neuroblast or one of its progeny commits to a pyramidal neuron fate, migrates from the ventricular zone to the appropriate layer in the cortex and develops into a mature neuron	0.227375	0.227375	UQCRQ
GO:0021860	pyramidal neuron development	4	1	0.03	108	0.02927	0.02927	1	1	The progression of a pyramidal neuron from its initial formation to its mature state	0.227375	0.227375	UQCRQ
GO:0031508	pericentric heterochromatin assembly	4	1	0.03	109	0.02927	0.02927	1	1	The assembly of chromatin into heterochromatin that is located adjacent to the CENP-A rich centromere 'central core' and characterized by the modified histone H3K9me3	0.198369	0.198369	H3F3A
GO:0032275	luteinizing hormone secretion	4	1	0.03	110	0.02927	0.02927	1	1	The regulated release of luteinizing hormone, a gonadotropic glycoprotein hormone secreted by the anterior pituitary	0.19589	0.19589	SMAD4, KISS1, TBX3	TMF1
GO:0033131	regulation of glucokinase activity	4	1	0.03	111	0.02927	0.02927	1	1	Any process that modulates the frequency, rate or extent of glucokinase activity, the catalysis of the transfer of a phosphate group, usually from ATP, to a glucose molecule	0.0615959	0.0615959	MIDN	DUSP12
GO:0042262	DNA protection	4	1	0.03	112	0.02927	0.02927	1	1	Any process in which DNA is protected from damage by, for example, oxidative stress	0.0722658	0.0722658	DCTPP1
GO:0043116	negative regulation of vascular permeabi...	4	1	0.03	113	0.02927	0.02927	1	1	Any process that reduces the extent to which blood vessels can be pervaded by fluid	0.401895	0.401895	ARHGAP35, PTPRJ
GO:0051572	negative regulation of histone H3-K4 met...	4	1	0.03	114	0.02927	0.02927	1	1	Any process that stops, prevents, or reduces the frequency, rate or extent of the covalent addition of a methyl group to the lysine at position 4 of histone H3	0.288533	0.288533	BRCA1
GO:0051660	establishment of centrosome localization	4	1	0.03	115	0.02927	0.02927	1	1	The directed movement of the centrosome to a specific location	0.0776642	0.0776642	EZR
GO:0060017	parathyroid gland development	4	1	0.03	116	0.02927	0.02927	1	1	The process whose specific outcome is the progression of the parathyroid gland over time, from its formation to the mature structure. The parathyroid gland is an organ specialised for secretion of parathyroid hormone	0.226785	0.226785	TGFBR1, CRKL
GO:0060124	positive regulation of growth hormone se...	4	1	0.03	117	0.02927	0.02927	1	1	Any process that increases the frequency, rate or extent of the regulated release of growth hormone from a cell	0.412767	0.412767	SERP1, KISS1
GO:0060623	regulation of chromosome condensation	4	1	0.03	118	0.02927	0.02927	1	1	Any process that modulates the rate, frequency, or extent of chromosome condensation, the progressive compaction of dispersed interphase chromatin into threadlike chromosomes prior to mitotic or meiotic nuclear division, or during apoptosis, in eukaryotic cells	0.0754384	0.0754384	H3F3A
GO:0071680	response to indole-3-methanol	4	1	0.03	119	0.02927	0.02927	1	1	Any process that results in a change in state or activity of a cell or an organism (in terms of movement, secretion, enzyme production, gene expression, etc.) as a result of an indole-3-methanol stimulus	0.415358	0.415358	BRCA1
GO:0071681	cellular response to indole-3-methanol	4	1	0.03	120	0.02927	0.02927	1	1	Any process that results in a change in state or activity of a cell (in terms of movement, secretion, enzyme production, gene expression, etc.) as a result of an indole-3-methanol stimulus	0.415358	0.415358	BRCA1
GO:1900041	negative regulation of interleukin-2 sec...	4	1	0.03	121	0.02927	0.02927	1	1	Any process that stops, prevents or reduces the frequency, rate or extent of interleukin-2 secretion	0.0703286	0.0703286	EZR
GO:1903299	regulation of hexokinase activity	4	1	0.03	122	0.02927	0.02927	1	1	Any process that modulates the frequency, rate or extent of hexokinase activity	0.0615959	0.0615959	MIDN	DUSP12
GO:1903975	regulation of glial cell migration	4	1	0.03	1802	0.02927	1	1	1		0.451558	0.451558	CERS2, TIAM1
GO:2000618	regulation of histone H4-K16 acetylation	4	1	0.03	1803	0.02927	1	1	1	Any process that modulates the frequency, rate or extent of histone H4-K16 acetylation	-0.0268822	-0.0268822	BRCA1	ATG5
GO:0034622	cellular macromolecular complex assembly	691	10	5.11	1521	0.02938	0.70218	1	1	The aggregation, arrangement and bonding together of a set of macromolecules to form a complex, carried out at the cellular level	0.997916	-1.3972	KAT6A, MZT1, ARHGAP18, IPO4, H3F3A, SNAP29, GTF2H3, SLAIN2, VILL, TAF9B, FCHSD2, MTPN, RPSA, NDUFA11, ARPC1B, TAF4, PRKCE, SPIRE2, UBC, MYOM2, RPA3, ARFIP1, HIST1H2BJ, PET100, SMAD4, NDUFA2, ARMC4, BIN1, KNL1, RPS10, WASF3, DDX6, NDUFB2, MECP2, KAT6B, PREX1, THRA, RPS19, EDC3, NLRP3, UQCC2, COX14, RPL10, OPA1, NDUFB6, MIS18BP1, HJURP, CTTN, H1FX, NDUFA9, ACTR2, SNAP23, RICTOR, ARF6, GEMIN8, COX10…	PSMD5, CETN2, HAT1, SLU7, SRP19, RPF1, BRIX1, CREB1, PFN2, ARPC5, GTF2B, ITGB3BP, UQCRB, HSP90AA1, CENPQ, PTGES3, EIF2AK2, DNM1L, RASA1, NAP1L1, RTN4, NCK1, TOMM20, EIF2A, NPM1, TAF9, PUM2, PSMC6, SEC24B, NDUFS1, CAPZA2, SBDS, PSMG1, ATPAF1, TMOD1, STRAP, CENPI, MNAT1, PSMG2, CAPZA1, TCP1, GTF2H1, AP003108.2, VAMP3, DNAAF5, CCNH, MTERF3, NUP205, SENP6, GREM1, RAB1A, SET, ACTR3, SRP54, FGF13, EXOC…
GO:0044710	single-organism metabolic process	2383	25	17.63	1396	0.02978	0.60359	1	1	A metabolic process - chemical reactions and pathways, including anabolism and catabolism, by which living organisms transform chemical substances - which involves a single organism	1.37705	-1.63981	TMX1, SPNS2, FAM126A, LRP8, INPP4B, FGFR3, CERS2, PSMA6, GPC2, EGLN2, VPS13C, IPPK, PPP1R3D, SLC25A32, EXOSC6, SOD2, SH3RF1, CARD9, LPGAT1, ADAM9, ADSS, PNPT1, FTCD, PI4K2B, POFUT1, TIAM1, D2HGDH, PNPLA7, MBOAT2, THTPA, UQCRHL, PRKAA1, MTHFR, CHUK, ACBD5, CYR61, ARSI, PDE8A, SLC5A3, NDUFA11, PRKCE, PSPH, MTMR1, FIGNL1, CSGALNACT2, UBC, UBIAD1, MC1R, PXYLP1, MRAP, BRCA1, NRAS, ST3GAL2, GFI1, DEGS1…	ITGB1, PSMD5, EXTL2, ZNF675, ELOVL7, OMA1, PPCS, PPT1, ATP5F1EP2, ARRDC3, DVL3, LYPLA1, PLPP5, UGP2, MMADHC, RNASEH2B, LINC02210-CRHR1, NRK, PSMD12, USP25, COL11A1, HIGD1A, NFE2L2, PDCD10, AZIN1, CREB1, SIN3A, GPD2, HPSE, AASDH, MINPP1, ABCC4, PIK3R1, RHOQ, MAP2K4, PGM3, PRKD3, NBPF9, ADNP, ZMYND11, GPAM, MBTPS2, SLC22A4, PCNA, LIPA, UQCRB, VRK2, LYN, SPP1, PTGES3, RASGRF1, KDM5A, ENTPD7, EIF2AK2…
GO:0051240	positive regulation of multicellular org...	694	10	5.13	212	0.03015	0.06233	1	1	Any process that activates or increases the frequency, rate or extent of an organismal process, any of the processes pertinent to the function of an organism above the cellular level; includes the integrated processes of tissues and organs	1.00521	-1.14728	LRP8, SKIL, POLR3K, EXOSC6, CARD9, TOB2, ADAM9, ARHGAP35, TIAM1, SMAD5, PRKAA1, CHUK, MTPN, DOCK1, CYR61, PRKCE, CDK9, NCOA3, BRCA1, TBX2, TRPV2, SLC22A5, EGR1, SMAD4, RAB8B, PPM1F, BIN1, SERP1, WASF3, ATOH8, POLR3G, PLXNB1, MECP2, RNF135, TENM4, KISS1, GSK3B, LGR4, AP3D1, RPS19, RNF10, DUSP10, TGFBR1, GATA2, FOXO3, CDK1, HILPDA, ATAD5, FBXO31, NLRP3, SEMA7A, ZNF703, MAGED1, OPA1, ANAPC2, FAM129B…	CD58, NFE2L2, CREB1, HPSE, PIK3R1, ADNP, GPAM, ZBTB1, LYN, TMF1, LY96, SPP1, PPP2R3C, EIF2AK2, AKIRIN2, DNM1L, LUM, MSH2, RTN4, NCK1, SMURF2, SNX3, MAN2A1, ATP11C, AP3B1, GPRC5B, GCH1, PUM2, TCF12, RAB11A, BASP1, ATP6AP2, TBC1D23, AC068234.1, DHX36, CAPRIN1, SDCBP, MKL2, CADM1, SLC1A1, EGFR, NKX3-1, ATG5, MSH6, EXOSC3, IQGAP3, SNX4, TFAP2A, GREM1, SMAP1, ISL1, FMR1, OXTR, JAK1, ZC3HAV1, IQGAP1, G…
GO:0009890	negative regulation of biosynthetic proc...	899	12	6.65	123	0.03027	0.03027	1	1	Any process that stops, prevents, or reduces the rate of the chemical reactions and pathways resulting in the formation of substances	1.07984	-1.45612	LRP8, KAT6A, SKIL, KLF12, NPAT, H3F3A, C1D, MEX3D, TOB2, ZBTB18, CDYL, ARHGAP35, CREBZF, TAF9B, PRKAA1, KLF16, AHR, HMG20A, HES6, UBC, BAHD1, CCAR1, BRCA1, GFI1, TBX2, GON4L, RTF1, IGFBP5, EGR1, SMAD4, TNRC6B, PPM1F, ATOH8, MECP2, CBX6, MDM4, SUV39H2, KAT6B, TSC22D3, GSK3B, LGR4, SUFU, THRA, SCMH1, SUPT6H, TNRC18, JARID2, FNIP1, SBNO2, ZHX2, MPHOSPH8, NKX3-2, NR1D2, GATA2, FOXO3, FOXM1, DAPK3, FL…	FAM220A, ZNF675, HAT1, THRB, UBE2D3, EPC1, RNF2, EIF3E, CREB1, SIN3A, ITM2B, ZMYND11, ZNF224, ZBTB1, BAZ2A, IRF2, NFIL3, KDM5A, STAT1, EIF2AK2, AKIRIN2, ZNF567, BTAF1, EED, COPS2, TMEM59, GLIS3, IKZF4, NCK1, SMURF2, UBA3, SUMO1, RBAK, ZBTB33, TRIM13, ZNF85, IREB2, PUM2, AEBP2, BASP1, AC068234.1, NR2C1, CAPRIN1, WWP1, STRAP, EGFR, CHCHD3, NKX3-1, NFE2L3, DR1, DDX5, ZBTB38, MTERF3, ZNF189, CGGBP1, …
GO:0022602	ovulation cycle process	37	2	0.27	717	0.0304	0.23181	1	1	A process involved in the sexual cycle seen in females, often with physiologic changes in the endometrium that recur at regular intervals during the reproductive years	0.607992	-0.39792	ADAMTS1, TAF4, SMAD4, KISS1, FOXO3, STAT5B	PDGFRA, UBE3A, CASP2, EIF2B2
GO:0060135	maternal process involved in female preg...	37	2	0.27	124	0.0304	0.0304	1	1	A reproductive process occurring in the mother that allows an embryo or fetus to develop within it	0.488033	-0.488936	KPNA6, DSG2, KISS1, APOL2, ASH1L, VDR, CTSV	SPP1, STC2, UBE2A, MED1, GJA1
GO:0009966	regulation of signal transduction	1558	18	11.53	577	0.03041	0.17417	1	1	Any process that modulates the frequency, rate or extent of signal transduction	1.10546	-1.55136	KAT6A, RNF6, SKP2, FGFR3, SKIL, ARHGAP18, PSMA6, KIF14, TAX1BP3, SOD2, SH3RF1, CARD9, SOCS7, ADAM9, ARHGAP35, TIAM1, BIRC6, TAF9B, PRKAA1, CHUK, KREMEN1, ATXN7, CYR61, PDE8A, TAF4, EPS8L1, PRKCE, FIGNL1, SOCS4, NDFIP2, IFNGR2, NCOA3, UBC, MC1R, RPA3, TRIO, LTBP1, BRCA1, RCAN3, GFI1, PIDD1, SHOC2, MYO5A, RMI1, RASSF2, IGFBP5, EGR1, SMAD4, DNA2, PALM3, KRAS, PTPN3, LAMTOR4, TRIM5, AKAP13, SHF, PLXN…	ITGB1, PSMD5, ATP2C1, ZNF675, TERF2IP, ARRDC3, DVL3, NRK, PSMD12, NOV, NFE2L2, PDCD10, SLC9A6, PTPN12, SNX13, HPSE, TAF5, PIK3R1, RHOQ, MAP2K4, DYRK1A, SH3BGRL, ZMYND11, PRKACB, YWHAZ, VRK2, LYN, LY96, RASGRF1, STAT1, EIF2AK2, LPXN, DNM1L, PSMA1, RASA1, ARHGAP5, UBE2N, CSNK2A2, RTN4, NCK1, SPPL2A, EIF2A, PPP1R15B, SMURF2, SNX3, SUMO1, TAF9, TRIM13, GPRC5B, PUM2, PSMC6, COL3A1, EEF1E1, PRNP, PDGFR…
GO:0070646	protein modification by small protein re...	237	5	1.75	125	0.03048	0.03048	1	1	A protein modification process in which one or more covalently attached groups of a small protein, such as ubiquitin or a ubiquitin-like protein, are removed from a target protein	0.802112	-1.19442	SKP2, PSMA6, TAF9B, ATXN7, UBC, BRCA1, MINDY1, SMAD4, RNF135, MDM4, BABAM1, CCP110, TGFBR1, STAM, NLRP3, KDM1B, USP37, HIF1A, USP53, MAVS, FOXK2, OTUD4, RPS27A, USP3, CYLD, IKBKG, SMAD3, ATXN7L3, STAM2, BAP1, SHMT2, TNIP1	PSMD5, SUPT3H, UCHL5, PSMD12, USP25, ABRAXAS2, USP14, PSMA1, COPS2, TOMM20, USPL1, SMURF2, SNX3, PSMC6, ABRAXAS1, PSMA4, SENP6, USP47, COPS8, PSMD14, USP48, CLSPN, USP16, PSMD6, SMAD2, ZRANB1, STAMBP, RIPK2, MINDY3, SMAD1, KAT2B, TRIM21, UCHL3, BRCC3, PSMD7, ACTL6A, BECN1
GO:0043603	cellular amide metabolic process	697	10	5.16	1719	0.03094	0.96285	1	1	The chemical reactions and pathways involving an amide, any derivative of an oxoacid in which an acidic hydroxy group has been replaced by an amino or substituted amino group, as carried out by individual cells	0.882926	-1.27832	CERS2, SLC25A32, MEX3D, GTF2H3, FTCD, SECISBP2L, PRKAA1, MTHFR, MTPN, CYR61, RPSA, EIF2B1, RPL31, DEGS1, IGFBP5, TNRC6B, SLC46A1, SERP1, RPS10, DDX6, LARP4, RPS21, NAGS, MRPL54, LNPEP, GGT7, RPS19, RPL41, SLC19A1, FOXO3, MRPS21, ST3GAL5, RPL21, DAPK3, DNAJC3, UQCC2, RPS29, RPS8, RPL10, RPS12, RPL35A, BTD, HLCS, RPL22L1, EIF1AX, PTBP1, SARS2, RPL37A, PCSK7, RPS27A, MTHFD2, STAT5B, CARNMT1, GTF2H2,…	RPL39, MRPS30, EIF3M, GSPT1, EIF3E, NFE2L2, PAIP1, AASDH, CPE, GSPT2, RPL15, HSP90AA1, MRPL3, EIF2AK2, CPA3, MRPL1, NCK1, IARS, FAM129A, EIF2A, PPP1R15B, ARG2, NPEPPS, NPM1, GCH1, IREB2, PUM2, EIF1B, EEF1E1, C12orf65, RARS, ATP6AP2, CAPRIN1, EIF3J, ALDH5A1, DARS2, EGFR, EIF3H, DDX5, HNRNPR, RMND1, MTIF3, RPL36A, ALKBH1, GARS, MCCC2, MRPS9, WARS2, TNRC6A, LAMP2, FMR1, YAE1D1, SSB, PRKRA, MALSU1, S…
GO:0019439	aromatic compound catabolic process	322	6	2.38	1804	0.03117	1	1	1	The chemical reactions and pathways resulting in the breakdown of aromatic compounds, any substance containing an aromatic carbon ring	0.779953	-1.26601	EXOSC6, PNPT1, FTCD, PDE8A, RPSA, POP1, RPL31, DNA2, TNRC6B, DCTPP1, RPS10, DDX6, RPS21, RPS19, ZHX2, RPL41, LSM5, EDC3, RPL21, RPS29, RPS8, RPL10, SAMHD1, RPS12, RPL35A, THRAP3, RPL37A, PDE7A, DPYD, RPS27A, NUDT18, ITPA, CARNMT1, RPS23, RPL34, XDH, AGO2, KPNA1, RPLP2, CASP3, NEIL2, NT5C3A	RPL39, MTREX, GSPT1, RNASEH2B, EIF3E, TENT2, DIS3, PAIP1, GSPT2, RPL15, TATDN1, HNMT, UPF2, TTC37, EXOSC3, DDX5, LSM1, HNRNPR, PPP2R2A, RPL36A, FMR1, ZC3HAV1, SSB, UNG, PATL1, EIF4B, EIF4E, SETMAR, PNRC2, CNOT2, RPL17-C18orf32, HPRT1, RC3H1, ERN1, NT5E, RPL17, RPL9, CNOT1, SUPV3L1, MBD4, NUDT12, EXOSC9, HBS1L, EIF4A2, PABPC1, DEDD2, OGG1, ZFP36L1, SMPDL3A, HNRNPD, SMG8, EGLN1, APOBEC3C, PON2
GO:0048585	negative regulation of response to stimu...	803	11	5.94	213	0.03212	0.06309	1	1	Any process that stops, prevents, or reduces the frequency, rate or extent of a response to a stimulus. Response to stimulus is a change in state or activity of a cell or an organism (in terms of movement, secretion, enzyme production, gene expression, etc.) as a result of a stimulus	0.994561	-1.43972	SKIL, CERS2, PSMA6, VPS13C, TAX1BP3, SOD2, SH3RF1, SOCS7, ARHGAP35, BIRC6, TAF9B, PRKAA1, KREMEN1, ATXN7, PDE8A, FIGNL1, SOCS4, UBC, LTBP1, BRCA1, RASSF2, IGFBP5, EGR1, SMAD4, PALM3, PTPN3, PARPBP, CDH2, GSK3B, LGR4, SUFU, LEMD3, PREX1, FNIP1, CBL, RPS19, DUSP10, TGFBR1, GATA2, FOXO3, FOXM1, STAM, PLCL2, DNAJC3, CASK, NLRP3, SLC35F6, ERLEC1, FLCN, OPA1, LEPROT, S1PR2, FAM129B, PTPRJ, UBR2, ASH1L,…	ITGB1, PSMD5, ZNF675, DVL3, PSMD12, USP25, NOV, NFE2L2, PTPN12, SNX13, DYRK1A, ZMYND11, PRKACB, LYN, LY96, SPP1, STAT1, EIF2AK2, USP14, LPXN, PSMA1, RASA1, SPX, NCK1, PPP1R15B, SMURF2, TAF9, PSMC6, COL3A1, PRNP, PDGFRA, BICC1, OXR1, PIAS2, HSPH1, CALM2, PAK1IP1, STRAP, PSMA4, IVNS1ABP, EGFR, AIDA, AP003108.2, GRB14, NKX3-1, HIPK3, SH3BP4, TPT1, LATS2, LGALS3, DNAJA1, GREM1, MBIP, LMBRD1, MEIS3, E…
GO:0007565	female pregnancy	94	3	0.7	127	0.03216	0.03216	1	1	The set of physiological processes that allow an embryo or foetus to develop within the body of a female animal. It covers the time from fertilization of a female ovum by a male spermatozoon until birth	0.670394	-0.790304	H3F3A, IGFBP5, KRAS, UMPS, KPNA6, DSG2, KISS1, LNPEP, APOL2, ASH1L, VDR, CTSV, STAT5B, TGFB1	LINC02210-CRHR1, SPP1, SMURF2, NAMPT, STC2, UBE2A, OXTR, SP3, MED1, PSG5, PSG1, UPRT, GJA1, FOSL1, EMP2
GO:0010628	positive regulation of gene expression	1017	13	7.52	209	0.03308	0.06048	1	1	Any process that increases the frequency, rate or extent of gene expression. Gene expression is the process in which a gene's coding sequence is converted into a mature gene product or products (proteins or RNA). This includes the production of an RNA transcript as well as any processing to produce a mature RNA product or an mRNA (for protein-coding genes) and the translation of that mRNA into pr…	1.07688	-1.31649	KLF6, KAT6A, FOSL2, RNF6, KLF12, NPAT, H3F3A, HOXC13, SMAD5, RXRB, TAF9B, PRKAA1, CHUK, ATXN7, CYR61, AHR, TAF4, CDK9, NCOA3, UBC, MC1R, CHD6, BRCA1, RTF1, TAF8, CDK8, CCNK, EGR1, SMAD4, PPM1F, KRAS, SERP1, KPNA6, ATOH8, LARP4, MECP2, ZNF593, TEF, MEF2D, KAT6B, GSK3B, LGR4, THRA, SUPT6H, RNF10, LDLR, TGFBR1, NR1D2, GATA2, TAF15, FOXO3, FOXM1, TOP2A, CDK1, DNAJC3, CASK, NLRP3, UQCC2, FLCN, NAT14, …	THRB, DVL3, EPC1, SUPT3H, EIF3E, NFE2L2, PDCD10, MED21, YEATS4, CREB1, SIN3A, PAIP1, E2F5, PIK3R1, RHOQ, GTF2B, MBTPS2, IRF2, SPP1, NFIL3, KDM5A, STAT1, AKIRIN2, ANKRD49, ZNF567, LUM, RLF, GLIS3, IFT74, IKZF4, NCK1, WDR75, DDX21, FAM129A, EIF2A, NCOA4, NPM1, TAF9, TAF1D, MED4, PSMC6, TCF12, NAMPT, TOPORS, GTF2F2, DHX36, PIAS2, HSPH1, MKL2, ARID4B, HEATR1, PCGF5, MNAT1, YWHAH, NFYB, UBE3A, EGFR, R…
GO:0000271	polysaccharide biosynthetic process	39	2	0.29	748	0.0335	0.24301	1	1	The chemical reactions and pathways resulting in the formation of a polysaccharide, a polymer of many (typically more than 10) monosaccharide residues linked glycosidically	0.567344	-0.459814	PPP1R3D, CSGALNACT2, UBC, GSK3B, B4GAT1, RPS27A, IRS1, PPP1CB, TGFB1	UGP2, GYG1, HAS2, NFKB1
GO:0036297	interstrand cross-link repair	39	2	0.29	128	0.0335	0.0335	1	1	Removal of a DNA interstrand crosslink (a covalent attachment of DNA bases on opposite strands of the DNA) and restoration of the DNA. DNA interstrand crosslinks occur when both strands of duplex DNA are covalently tethered together (e.g. by an exogenous or endogenous agent), thus preventing the strand unwinding necessary for essential DNA functions such as transcription and replication	0.479132	-0.403948	UBC, RPA3, DCLRE1B, RPS27A, FAAP24	DCLRE1C, FANCB, FANCL, SLX4
GO:0045778	positive regulation of ossification	39	2	0.29	129	0.0335	0.0335	1	1	Any process that activates or increases the frequency, rate or extent of bone formation	0.535034	-0.395942	TOB2, SMAD5, CYR61, PKDCC, WNT10B, SMAD3, TGFB1	TFAP2A, BMP4, SMAD1, WNT5A
GO:0045893	positive regulation of transcription, DN...	809	11	5.99	229	0.03368	0.0657	1	1	Any process that activates or increases the frequency, rate or extent of cellular DNA-templated transcription	1.05779	-1.29818	KLF6, KAT6A, FOSL2, RNF6, KLF12, NPAT, HOXC13, SMAD5, RXRB, TAF9B, CHUK, ATXN7, CYR61, AHR, TAF4, CDK9, NCOA3, UBC, MC1R, CHD6, BRCA1, RTF1, TAF8, CDK8, CCNK, EGR1, SMAD4, KPNA6, ATOH8, MECP2, ZNF593, TEF, MEF2D, KAT6B, GSK3B, LGR4, THRA, SUPT6H, RNF10, TGFBR1, NR1D2, GATA2, TAF15, FOXO3, FOXM1, TOP2A, CASK, NLRP3, FLCN, NAT14, MAGED1, ZFHX3, POU2F1, AAMDC, FAM129B, ASH1L, LMNA, RBL1, TFAP4, NOTC…	THRB, DVL3, EPC1, SUPT3H, NFE2L2, MED21, YEATS4, CREB1, SIN3A, E2F5, PIK3R1, RHOQ, MBTPS2, IRF2, SPP1, KDM5A, STAT1, AKIRIN2, ANKRD49, ZNF567, LUM, RLF, GLIS3, IFT74, IKZF4, NCK1, WDR75, EIF2A, NCOA4, NPM1, TAF9, MED4, PSMC6, TCF12, NAMPT, TOPORS, GTF2F2, DHX36, PIAS2, HSPH1, MKL2, ARID4B, HEATR1, PCGF5, MNAT1, YWHAH, NFYB, UBE3A, EGFR, RTRAF, GTF2H1, NKX3-1, CKAP2, CHURC1, NFE2L3, CBFB, CCNH, DD…
GO:1903508	positive regulation of nucleic acid-temp...	809	11	5.99	230	0.03368	0.0657	1	1	Any process that activates or increases the frequency, rate or extent of nucleic acid-templated transcription	1.05779	-1.29818	KLF6, KAT6A, FOSL2, RNF6, KLF12, NPAT, HOXC13, SMAD5, RXRB, TAF9B, CHUK, ATXN7, CYR61, AHR, TAF4, CDK9, NCOA3, UBC, MC1R, CHD6, BRCA1, RTF1, TAF8, CDK8, CCNK, EGR1, SMAD4, KPNA6, ATOH8, MECP2, ZNF593, TEF, MEF2D, KAT6B, GSK3B, LGR4, THRA, SUPT6H, RNF10, TGFBR1, NR1D2, GATA2, TAF15, FOXO3, FOXM1, TOP2A, CASK, NLRP3, FLCN, NAT14, MAGED1, ZFHX3, POU2F1, AAMDC, FAM129B, ASH1L, LMNA, RBL1, TFAP4, NOTC…	THRB, DVL3, EPC1, SUPT3H, NFE2L2, MED21, YEATS4, CREB1, SIN3A, E2F5, PIK3R1, RHOQ, MBTPS2, IRF2, SPP1, KDM5A, STAT1, AKIRIN2, ANKRD49, ZNF567, LUM, RLF, GLIS3, IFT74, IKZF4, NCK1, WDR75, EIF2A, NCOA4, NPM1, TAF9, MED4, PSMC6, TCF12, NAMPT, TOPORS, GTF2F2, DHX36, PIAS2, HSPH1, MKL2, ARID4B, HEATR1, PCGF5, MNAT1, YWHAH, NFYB, UBE3A, EGFR, RTRAF, GTF2H1, NKX3-1, CKAP2, CHURC1, NFE2L3, CBFB, CCNH, DD…
GO:1901361	organic cyclic compound catabolic proces...	329	6	2.43	1805	0.03412	1	1	1	The chemical reactions and pathways resulting in the breakdown of organic cyclic compound	0.779953	-1.26601	EXOSC6, PNPT1, FTCD, PDE8A, RPSA, POP1, RPL31, DNA2, TNRC6B, DCTPP1, RPS10, DDX6, RPS21, RPS19, ZHX2, RPL41, LSM5, EDC3, RPL21, RPS29, RPS8, RPL10, SAMHD1, RPS12, RPL35A, THRAP3, RPL37A, PDE7A, DPYD, RPS27A, NUDT18, ITPA, CARNMT1, RPS23, RPL34, SNX17, XDH, AGO2, KPNA1, RPLP2, CASP3, NEIL2, NT5C3A	RPL39, MTREX, GSPT1, RNASEH2B, EIF3E, TENT2, DIS3, PAIP1, GSPT2, RPL15, SPP1, TATDN1, HNMT, UPF2, YWHAH, TTC37, EXOSC3, DDX5, LSM1, HNRNPR, PPP2R2A, RPL36A, FMR1, ZC3HAV1, SSB, HSD17B11, UNG, PATL1, EIF4B, EIF4E, SETMAR, PNRC2, CNOT2, RPL17-C18orf32, HPRT1, RC3H1, ERN1, NT5E, RPL17, RPL9, CNOT1, SUPV3L1, MBD4, NUDT12, EXOSC9, HBS1L, EIF4A2, PABPC1, DEDD2, OGG1, ZFP36L1, SMPDL3A, HNRNPD, SMG8, EGL…
GO:0009410	response to xenobiotic stimulus	40	2	0.3	130	0.0351	0.0351	1	1	Any process that results in a change in state or activity of a cell or an organism (in terms of movement, secretion, enzyme production, gene expression, etc.) as a result of a xenobiotic compound stimulus. Xenobiotic compounds are compounds foreign to living organisms	0.381888	-0.448573	AHR, CYB5B, GSTO1	PTGES3, GSTM4, MGST1, CMBL, ACSL1
GO:0006091	generation of precursor metabolites and ...	247	5	1.83	721	0.0355	0.23406	1	1	The chemical reactions and pathways resulting in the formation of precursor metabolites, substances from which energy is derived, and any process involved in the liberation of energy from these substances	0.80267	-0.873671	PPP1R3D, PNPT1, D2HGDH, THTPA, UQCRHL, PRKAA1, NDUFA11, UBC, NDUFA2, NDUFB2, MECP2, PFKFB4, PYGB, GSK3B, CDK1, UQCC2, NDUFB6, NDUFA9, HIF1A, UQCRQ, STK40, STBD1, COX10, RPS27A, IRS1, PPP1CB, SIRT6, TAZ	UGP2, UQCRB, MSH2, FASTKD3, NDUFS1, CALM2, ALDH5A1, AP003108.2, ATP5F1C, PMPCB, IDH3A, GFPT1, NDUFA12, GYG1, PPP1R3E, PDHB, NOA1, ETFDH, BPGM, GAPDH, NNT, NDUFB1, FASTKD2, SLC25A13, PPP1CC, NDUFA6, PANK2, AK9
GO:0021543	pallium development	98	3	0.73	521	0.03574	0.15711	1	1	The process whose specific outcome is the progression of the pallium over time, from its formation to the mature structure. The pallium is the roof region of the telencephalon	0.72622	-0.763893	LRP8, KIF14, SOCS7, CDH2, GSK3B, SRGAP2, HIF1A, TACC2, UQCRQ, TACC1, SUN2, CASP3	TENT2, CSNK2A2, RTN4, COL3A1, EGFR, FGF13, ATP2B4, NDE1, SYNE2, CDK6, ASPM, NF1, ROBO1, FBXO45, CEP120, NCOA1, TRA2B
GO:0090501	RNA phosphodiester bond hydrolysis	98	3	0.73	1199	0.03574	0.47868	1	1	The RNA metabolic process in which the phosphodiester bonds between ribonucleotides are cleaved by hydrolysis	0.654222	-0.809886	POLR3K, PNPT1, RPSA, POP1, RPS21, EDC3, RNASEK, FCF1, AGO2, MRPL44, TSEN54	RNASEH2B, DIS3, MRPL1, TSEN15, PCF11, EXOSC3, FIP1L1, KIAA0391, LACTB2, CNOT2, ERN1, CNOT1, EXOSC9, EXO1
GO:2000113	negative regulation of cellular macromol...	818	11	6.05	131	0.03611	0.03611	1	1	Any process that stops, prevents, or reduces the frequency, rate or extent of cellular macromolecule biosynthetic process	1.05741	-1.45612	LRP8, KAT6A, SKIL, KLF12, H3F3A, C1D, MEX3D, ZBTB18, ARHGAP35, CREBZF, TAF9B, KLF16, AHR, HMG20A, HES6, UBC, BAHD1, BRCA1, GFI1, TBX2, GON4L, RTF1, IGFBP5, EGR1, SMAD4, TNRC6B, PPM1F, ATOH8, MECP2, CBX6, MDM4, SUV39H2, KAT6B, TSC22D3, GSK3B, LGR4, SUFU, THRA, SCMH1, SUPT6H, TNRC18, JARID2, FNIP1, SBNO2, ZHX2, MPHOSPH8, NKX3-2, NR1D2, GATA2, FOXO3, FOXM1, DAPK3, FLCN, RPL10, ZNF703, MAGED1, ZFHX3,…	FAM220A, ZNF675, HAT1, THRB, UBE2D3, EPC1, RNF2, EIF3E, CREB1, SIN3A, ITM2B, ZMYND11, ZNF224, ZBTB1, BAZ2A, IRF2, NFIL3, KDM5A, STAT1, EIF2AK2, AKIRIN2, ZNF567, BTAF1, EED, COPS2, TMEM59, GLIS3, IKZF4, NCK1, SMURF2, UBA3, SUMO1, RBAK, ZBTB33, IREB2, PUM2, AEBP2, BASP1, NR2C1, CAPRIN1, WWP1, STRAP, EGFR, CHCHD3, NKX3-1, NFE2L3, DR1, DDX5, ZBTB38, MTERF3, ZNF189, CGGBP1, HNRNPR, TFAP2A, ZNF93, BPTF…
GO:0001542	ovulation from ovarian follicle	5	1	0.04	132	0.03646	0.03646	1	1	The process leading to the rupture of the follicle, releasing the centrally located oocyte into the oviduct. An example of this is found in Mus musculus	0.336921	0.336921	ADAMTS1, FOXO3
GO:0009211	pyrimidine deoxyribonucleoside triphosph...	5	1	0.04	1806	0.03646	1	1	1	The chemical reactions and pathways involving pyrimidine deoxyribonucleoside triphosphate, a compound consisting of a pyrimidine base linked to a deoxyribose sugar esterified with triphosphate on the sugar	0.00818775	0.00818775	DCTPP1	TBPL1
GO:0014010	Schwann cell proliferation	5	1	0.04	1807	0.03646	1	1	1	The multiplication or reproduction of Schwann cells, resulting in the expansion of their population. Schwann cells are a type of glial cell in the peripheral nervous system	0.448453	0.448453	CERS2, RNF10
GO:0032274	gonadotropin secretion	5	1	0.04	133	0.03646	0.03646	1	1	The regulated release of a gonadotropin, any hormone that stimulates the gonads, especially follicle-stimulating hormone and luteinizing hormone	0.261373	0.261373	SMAD4, KISS1, FAM129B, TBX3	TMF1
GO:0033690	positive regulation of osteoblast prolif...	5	1	0.04	134	0.03646	0.03646	1	1	Any process that activates or increases the rate or extent of osteoblast proliferation	0.0205825	0.0205825	CYR61	HPSE
GO:0048681	negative regulation of axon regeneration	5	1	0.04	1808	0.03646	1	1	1	Any process that stops, prevents, or reduces the frequency, rate or extent of axon regeneration	-0.0206573	-0.0206573	CERS2	SPP1
GO:0051029	rRNA transport	5	1	0.04	135	0.03646	0.03646	1	1	The directed movement of rRNA, ribosomal ribonucleic acid, into, out of or within a cell, or between cells, by means of some agent such as a transporter or pore	0.330451	0.330451	PNPT1, RPSA, TST
GO:0060123	regulation of growth hormone secretion	5	1	0.04	136	0.03646	0.03646	1	1	Any process that modulates the frequency, rate or extent of the regulated release of growth hormone from a cell	0.339744	0.339744	SERP1, KISS1
GO:0060316	positive regulation of ryanodine-sensiti...	5	1	0.04	137	0.03646	0.03646	1	1	Any process that increases the activity of a ryanodine-sensitive calcium-release channel. The ryanodine-sensitive calcium-release channel catalyzes the transmembrane transfer of a calcium ion by a channel that opens when a ryanodine class ligand has been bound by the channel complex or one of its constituent parts	-0.0297825	-0.0297825	GSTO1	CALM2
GO:0070571	negative regulation of neuron projection...	5	1	0.04	1809	0.03646	1	1	1	Any process that stops, prevents, or reduces the frequency, rate or extent of neuron projection regeneration, the regrowth of neuronal processes such as axons or dendrites following their loss or damage	-0.0206573	-0.0206573	CERS2	SPP1
GO:0090240	positive regulation of histone H4 acetyl...	5	1	0.04	1810	0.03646	1	1	1	Any process that increases the rate, frequency, or extent of histone H4 acetylation, the modification of histone H4 by the addition of an acetyl group	0.127715	0.127715	BRCA1, MUC1	KAT7
GO:1902946	protein localization to early endosome	5	1	0.04	138	0.03646	0.03646	1	1	A process in which a protein is transported to, or maintained in, a location within an early endosome	0.177277	0.177277	SCRIB, RDX, EZR
GO:2000617	positive regulation of histone H3-K9 ace...	5	1	0.04	139	0.03646	0.03646	1	1	Any process that activates or increases the frequency, rate or extent of histone H3-K9 acetylation	0.208745	0.208745	BRCA1, SMAD4
GO:0007165	signal transduction	2679	27	19.82	1130	0.03743	0.44413	1	1	The cellular process in which a signal is conveyed to trigger a change in the activity or state of a cell. Signal transduction begins with reception of a signal (e.g. a ligand binding to a receptor or receptor activation by a stimulus such as light), or for signal transduction in the absence of ligand, signal-withdrawal or the activity of a constitutively active receptor. Signal transduction ends…	1.3983	-1.66948	SPNS2, FAM126A, ADAMTS1, AKAP10, LRP8, KAT6A, LRRC40, AL928654.3, RNF6, INPP4B, SKP2, FGFR3, SKIL, ARHGAP18, PSMA6, KIF14, GPC2, EGLN2, TAX1BP3, SOD2, SH3RF1, CNPY2, CARD9, SOCS7, TSPAN9, ADAM9, POFUT1, ARHGAP35, TIAM1, SMAD5, BIRC6, RXRB, SLC12A2, TAF9B, PRKAA1, KLF16, CHUK, KREMEN1, DTX4, ATXN7, DOCK1, CYR61, PDE8A, AHR, ARPC1B, TAF4, EPS8L1, TIE1, PRKCE, LIMK2, FIGNL1, SOCS4, NDFIP2, IFNGR2, N…	ITGB1, GEM, PSMD5, ATP2C1, ZNF675, ASB3, THRB, UBE2D3, TERF2IP, ARRDC3, XPR1, DVL3, PLPP5, LINC02210-CRHR1, SNRK, NRK, SEC31A, PSMD12, NOV, NFE2L2, PDCD10, SLC9A6, PTPN12, SNX13, CREB1, HPSE, TAF5, ARPC5, KIAA0586, PIK3R1, RHOQ, MAP2K4, PRKD3, INTS6, DYRK1A, DST, CPE, SH3BGRL, ZMYND11, ITGB3BP, ASB14, MBTPS2, GNG5, PCNA, PRKACB, YWHAZ, VRK2, HSP90AA1, IRF2, FMN2, LYN, LY96, PTGES3, RASGRF1, STAT1…
GO:0007266	Rho protein signal transduction	100	3	0.74	140	0.03761	0.03761	1	1	A series of molecular signals within the cell that are mediated by a member of the Rho family of proteins switching to a GTP-bound active state	0.746898	-0.904561	TAX1BP3, ARHGAP35, TIAM1, CHUK, EPS8L1, TRIO, AKAP13, VAV2, PREX1, PLEKHG3, GPR4, FLCN, PLEKHG4, GPR17, PDGFRB, F2R	ITGB1, RASGRF1, ARHGAP5, COL3A1, DNMBP, SOS2, ARHGEF12, AGTR1, GNA13, SYNJ2BP, F2RL2, HACD3, CTNNAL1, CDC42EP3, MET, ROBO1, PLEKHG5, ECT2, ARHGEF26, PLEKHG7
GO:2001236	regulation of extrinsic apoptotic signal...	100	3	0.74	141	0.03761	0.03761	1	1	Any process that modulates the frequency, rate or extent of extrinsic apoptotic signaling pathway	0.72358	-0.61021	SKIL, SH3RF1, BIRC6, BRCA1, PIDD1, PAK2, MADD, TGFBR1, DAPK3, LMNA, CTTN, ATF3, HTT, CYLD, TRADD, TIMP3, ITM2C	ZMYND11, LGALS3, EYA4, PHIP, YAP1, RPS6KB1, STK3, STRADB, BMP4, NF1, DEDD2, SRC
GO:0046034	ATP metabolic process	172	4	1.27	884	0.03813	0.31411	1	1	The chemical reactions and pathways involving ATP, adenosine triphosphate, a universally important coenzyme and enzyme regulator	0.684307	-0.852972	UQCRHL, PRKAA1, NDUFA11, FIGNL1, NDUFA2, NDUFB2, MECP2, PFKFB4, CDK1, UQCC2, PARG, FLCN, NDUFB6, NDUFA9, HIF1A, UQCRQ, COX10, TSPO, SIRT6, TGFB1, TAZ	ATP5F1EP2, UQCRB, DNM1L, MSH2, NDUFS1, AP003108.2, ATP5F1C, PMPCB, NDUFA12, BPGM, GAPDH, HSPA8, NDUFB1, SLC25A13, NDUFA6, AK9
GO:0044723	single-organism carbohydrate metabolic p...	252	5	1.86	381	0.0382	0.10973	1	1	The chemical reactions and pathways involving carbohydrates, occurring within a single organism	0.811239	-0.923299	IPPK, PPP1R3D, POFUT1, PRKAA1, SLC5A3, PRKCE, CSGALNACT2, UBC, ST3GAL2, IGFBP5, SERP1, MECP2, MIDN, PFKFB4, PYGB, GSK3B, ST3GAL5, HRH1, RPIA, HIF1A, ATF3, STK40, STBD1, WDR5, B4GAT1, RPS27A, IRS1, HECTD4, SLC35B4, MANBA, GSTO1, SLC25A10, PPP1CB, SIRT6, TGFB1	OMA1, UGP2, GPD2, MAN2A1, CALM2, ALDH5A1, CTBS, FUT8, GK, ARPP19, GYG1, PPP1R3E, ADIPOR1, FUCA2, PDHB, HAS2, SDHAF3, IMPAD1, BPGM, GAPDH, DUSP12, IMPA1, PDK3, SLC25A13, MAN2A2, NFKB1, PPP1CC, KAT2B, SRC
GO:0006120	mitochondrial electron transport, NADH t...	42	2	0.31	142	0.03839	0.03839	1	1	The transfer of electrons from NADH to ubiquinone that occurs during oxidative phosphorylation, mediated by the multisubunit enzyme known as complex I	0.462331	-0.389178	NDUFA11, NDUFA2, NDUFB2, NDUFB6, NDUFA9	NDUFS1, NDUFA12, NDUFB1, NDUFA6
GO:0034637	cellular carbohydrate biosynthetic proce...	42	2	0.31	784	0.03839	0.25951	1	1	The chemical reactions and pathways resulting in the formation of carbohydrates, any of a group of organic compounds based of the general formula Cx(H2O)y, carried out by individual cells	0.558783	-0.500593	PPP1R3D, CSGALNACT2, UBC, GSK3B, B4GAT1, RPS27A, IRS1, PPP1CB	UGP2, GYG1, HAS2, IMPAD1, IMPA1
GO:1902680	positive regulation of RNA biosynthetic ...	829	11	6.13	262	0.03926	0.07491	1	1	Any process that activates or increases the frequency, rate or extent of RNA biosynthetic process	1.05779	-1.29818	KLF6, KAT6A, FOSL2, RNF6, KLF12, NPAT, HOXC13, SMAD5, RXRB, TAF9B, CHUK, ATXN7, CYR61, AHR, TAF4, CDK9, NCOA3, UBC, MC1R, CHD6, BRCA1, RTF1, TAF8, CDK8, CCNK, EGR1, SMAD4, KPNA6, ATOH8, MECP2, ZNF593, TEF, MEF2D, KAT6B, GSK3B, LGR4, THRA, SUPT6H, RNF10, TGFBR1, NR1D2, GATA2, TAF15, FOXO3, FOXM1, TOP2A, CASK, NLRP3, FLCN, NAT14, MAGED1, ZFHX3, POU2F1, AAMDC, FAM129B, ASH1L, LMNA, RBL1, TFAP4, NOTC…	THRB, DVL3, EPC1, SUPT3H, NFE2L2, MED21, YEATS4, CREB1, SIN3A, E2F5, PIK3R1, RHOQ, GTF2B, MBTPS2, IRF2, SPP1, KDM5A, STAT1, AKIRIN2, ANKRD49, ZNF567, LUM, RLF, GLIS3, IFT74, IKZF4, NCK1, WDR75, EIF2A, NCOA4, NPM1, TAF9, MED4, PSMC6, TCF12, NAMPT, TOPORS, GTF2F2, DHX36, PIAS2, HSPH1, MKL2, ARID4B, HEATR1, PCGF5, MNAT1, YWHAH, NFYB, UBE3A, EGFR, RTRAF, GTF2H1, NKX3-1, CKAP2, CHURC1, NFE2L3, CBFB, C…
GO:0010604	positive regulation of macromolecule met...	1720	19	12.73	593	0.03935	0.18194	1	1	Any process that increases the frequency, rate or extent of the chemical reactions and pathways involving macromolecules, any molecule of high relative molecular mass, the structure of which essentially comprises the multiple repetition of units derived, actually or conceptually, from molecules of low relative molecular mass	1.19303	-1.43921	LRP8, KLF6, KAT6A, FOSL2, RNF6, SKP2, FGFR3, KLF12, PSMA6, KIF14, NPAT, EGLN2, H3F3A, EXOSC6, HOXC13, CNPY2, CARD9, ADAM9, PNPT1, DSCC1, TIAM1, SMAD5, ANAPC7, RXRB, TAF9B, PRKAA1, CHUK, MTPN, ATXN7, CYR61, PDE8A, AHR, TAF4, PRKCE, CDK9, SOCS4, NDFIP2, NCOA3, UBC, MC1R, PXYLP1, CHD6, BRCA1, PIDD1, RTF1, TAF8, CDK8, CCNK, RASSF2, EGR1, SMAD4, DNA2, TNRC6B, PPM1F, KRAS, PRKAR1B, TRIM5, SERP1, PCOLCE…	PSMD5, THRB, TERF2IP, ARRDC3, DVL3, EPC1, SUPT3H, NRK, PSMD12, EIF3E, NFE2L2, PDCD10, MED21, YEATS4, CREB1, SIN3A, PAIP1, E2F5, PFN2, PIK3R1, RHOQ, MAP2K4, DYRK1A, ADNP, GTF2B, MBTPS2, PCNA, TMTC3, PRKACB, HSP90AA1, IRF2, LYN, SPP1, PTGES3, NFIL3, KDM5A, STAT1, PPP2R3C, EIF2AK2, AKIRIN2, ANKRD49, ZNF567, PSMA1, ANAPC10, EED, DCUN1D5, LUM, RLF, UBE2N, GLIS3, MSH2, IFT74, IKZF4, NCK1, WDR75, DDX21,…
GO:0042770	signal transduction in response to DNA d...	103	3	0.76	1191	0.0405	0.47511	1	1	A cascade of processes induced by the detection of DNA damage within a cell	0.606076	-0.726234	UBC, BRCA1, PIDD1, MDM4, FOXO3, FOXM1, CDK1, TFAP4, MUC1, CHEK2, RBL2, RPS27A, ING4, BRCA2, RINT1	DYRK1A, PCNA, NPM1, EEF1E1, DDX5, CASP2, CEP63, CNOT2, CNOT1, TRIAP1, PTTG1IP
GO:0016072	rRNA metabolic process	257	5	1.9	794	0.04102	0.26464	1	1	The chemical reactions and pathways involving rRNA, ribosomal RNA, a structural constituent of ribosomes	0.714601	-1.1431	C1D, EXOSC6, RPSA, RPL31, RPS10, NSUN5P1, RPS21, RPS19, RPL41, RPL21, DHX37, RPS29, RPS8, RPL10, RNASEK, RPS12, RPL35A, FCF1, UTP11, RPL37A, NSUN5, RIOK2, RPS27A, NPM3, RRNAD1, RPS23, RPL34, RPLP2, CD3EAP	RPL39, MTREX, RPF1, DIS3, MPHOSPH10, UTP3, RPL15, MRPL1, WDR75, DDX21, NOP58, SBDS, RRP15, HEATR1, NIFK, EXOSC3, TRMT61B, RPL36A, THUMPD1, MRPS9, MAK16, UTP4, RPL17-C18orf32, FRG1, RPL17, RPL9, IMP4, NOL11, UTP15, EXOSC9, DEDD2, LTV1, RRP7BP
GO:0044706	multi-multicellular organism process	104	3	0.77	143	0.04149	0.04149	1	1	A multicellular organism process which involves another multicellular organism of the same or different species	0.670394	-0.868819	H3F3A, IGFBP5, KRAS, UMPS, KPNA6, DSG2, KISS1, LNPEP, APOL2, ASH1L, VDR, CTSV, STAT5B, EDN1, TGFB1	LINC02210-CRHR1, NRK, SPP1, SMURF2, NAMPT, STC2, UBE2A, OXTR, SP3, MED1, PSG5, PSG1, UPRT, GJA1, FOSL1, EMP2
GO:0030900	forebrain development	177	4	1.31	457	0.04167	0.13644	1	1	The process whose specific outcome is the progression of the forebrain over time, from its formation to the mature structure. The forebrain is the anterior of the three primary divisions of the developing chordate brain or the corresponding part of the adult brain (in vertebrates, includes especially the cerebral hemispheres, the thalamus, and the hypothalamus and especially in higher vertebrates…	0.788697	-0.958206	LRP8, KIF14, SOCS7, ARHGAP35, KRAS, CDH2, GSK3B, GATA2, SRGAP2, SEMA7A, NOTCH1, HIF1A, TACC2, UQCRQ, TACC1, TBX3, GSX2, SZT2, HHEX, SUN2, PITX1, NFIB, GDPD5, CASP3, RAB3GAP1	UCHL5, TENT2, CREB1, ARPC5, CSNK2A2, RTN4, COL3A1, EGFR, ISL1, OXTR, FGF13, ATP2B4, NDE1, SYNE2, CDK6, DKK1, ID2, ASPM, HPRT1, RAPGEF2, BMP4, AXL, PCM1, RYK, NF1, TWSG1, ROBO1, GNAO1, FBXO45, CEP120, WNT5A, NCOA1, RARB, MYH10, TRA2B, RBPJ, APP, SRC
GO:0030522	intracellular receptor signaling pathway	179	4	1.32	144	0.04313	0.04313	1	1	Any series of molecular signals initiated by a ligand binding to an receptor located within a cell	0.856632	-0.900828	RNF6, SKP2, EGLN2, RXRB, CHUK, AHR, NCOA3, UBC, BRCA1, THRA, NR1D2, XIAP, THRAP3, VDR, MAVS, RPS27A, CYLD, AKR1C3, IRAK2, ERBIN, IKBKG, TRIM68	THRB, UBE2N, NCOA4, MED4, PUM2, NR2C1, PIAS2, TAB2, YWHAH, UBE3A, UBA5, NKX3-1, DDX5, KDM5D, PLPP1, DNAJA1, NR2F1, ISL1, KDM3A, MED12, NOTCH2, DDX17, RNF14, MED1, MED17, CNOT2, CNOT1, PUM1, PDK3, RIPK2, NCOA1, RARB, SRC
GO:0006004	fucose metabolic process	6	1	0.04	145	0.04359	0.04359	1	1	The chemical reactions and pathways involving fucose, or 6-deoxygalactose, which has two enantiomers, D-fucose and L-fucose	-0.0789189	-0.0789189	POFUT1	FUT8, FUCA2
GO:0009048	dosage compensation by inactivation of X...	6	1	0.04	146	0.04359	0.04359	1	1	Compensating for the two-fold variation in X-chromosome:autosome ratios between sexes by a global inactivation of all, or most of, the genes on one of the X-chromosomes in the XX sex	0.0994328	0.0994328	BRCA1
GO:0009204	deoxyribonucleoside triphosphate catabol...	6	1	0.04	1811	0.04359	1	1	1	The chemical reactions and pathways resulting in the breakdown of a deoxyribonucleoside triphosphate, a compound consisting of a nucleobase linked to a deoxyribose sugar esterified with triphosphate on the sugar	0.166692	0.166692	DCTPP1, SAMHD1
GO:0010992	ubiquitin homeostasis	6	1	0.04	147	0.04359	0.04359	1	1	Any process involved in the maintenance of an internal steady state of ubiquitin monomers and free ubiquitin chains at the level of the cell	0.0706766	0.0706766	UBC
GO:0021794	thalamus development	6	1	0.04	148	0.04359	0.04359	1	1	The process in which the thalamus changes over time, from its initial formation to its mature state	0.154177	0.154177	UQCRQ
GO:0030953	astral microtubule organization	6	1	0.04	149	0.04359	0.04359	1	1	A process that is carried out at the cellular level which results in the assembly, arrangement of constituent parts, or disassembly of astral microtubules, any of the spindle microtubules that radiate in all directions from the spindle poles	-0.139137	-0.139137	EZR	RAB11A, CEP120
GO:0032933	SREBP signaling pathway	6	1	0.04	1812	0.04359	1	1	1	A series of molecular signals from the endoplasmic reticulum to the nucleus generated as a consequence of decreased levels of one or more sterols (and in some yeast, changes in oxygen levels) and which proceeds through activation of a sterol response element binding transcription factor (SREBP) to result in up-regulation of target gene transcription	-0.094687	-0.094687	LMNA	EIF2A
GO:0042178	xenobiotic catabolic process	6	1	0.04	150	0.04359	0.04359	1	1	The chemical reactions and pathways resulting in the breakdown of a xenobiotic compound, a compound foreign to living organisms. Used of chemical compounds, e.g. a xenobiotic chemical, such as a pesticide	-0.138242	-0.138242	GSTO1	GSTM4, ACSL1
GO:0045603	positive regulation of endothelial cell ...	6	1	0.04	151	0.04359	0.04359	1	1	Any process that activates or increases the frequency, rate or extent of endothelial cell differentiation	0.296752	0.296752	ATOH8, S1PR2, NOTCH1	BMP4
GO:0045989	positive regulation of striated muscle c...	6	1	0.04	1813	0.04359	1	1	1	Any process that activates or increases the frequency, rate or extent of striated muscle contraction	-0.00341002	-0.00341002	GSTO1	RGS2
GO:0046600	negative regulation of centriole replica...	6	1	0.04	152	0.04359	0.04359	1	1	Any process that stops, prevents, or reduces the frequency, rate or extent of centriole replication	-0.00201606	-0.00201606	BRCA1	MDM1
GO:0051574	positive regulation of histone H3-K9 met...	6	1	0.04	153	0.04359	0.04359	1	1	Any process that activates or increases the frequency, rate or extent of the covalent addition of a methyl group to the lysine at position 9 of histone H3	0.287995	0.287995	BRCA1, MECP2, JARID2
GO:0071501	cellular response to sterol depletion	6	1	0.04	1814	0.04359	1	1	1	Any process that results in a change in state or activity of a cell (in terms of movement, secretion, enzyme production, gene expression, etc.) as a result of a stimulus indicating deprivation of sterols. Sterols are a group of steroids characterized by the presence of one or more hydroxyl groups and a hydrocarbon side-chain in the molecule	-0.094687	-0.094687	LMNA	EIF2A
GO:0085020	protein K6-linked ubiquitination	6	1	0.04	154	0.04359	0.04359	1	1	A protein ubiquitination process in which a polymer of ubiquitin, formed by linkages between lysine residues at position 6 of the ubiquitin monomers, is added to a protein. K6-linked ubiquitination is involved in DNA repair	0.441649	0.441649	RNF6, BRCA1
GO:0090230	regulation of centromere complex assembl...	6	1	0.04	155	0.04359	0.04359	1	1	Any process that modulates the rate, frequency, or extent of centromere complex assembly, the aggregation, arrangement and bonding together of proteins and centromeric DNA molecules to form a centromeric protein-DNA complex	0.0380355	0.0380355	H3F3A	SENP6
GO:1900040	regulation of interleukin-2 secretion	6	1	0.04	156	0.04359	0.04359	1	1	Any process that modulates the frequency, rate or extent of interleukin-2 secretion	0.0214071	0.0214071	EZR
GO:1902916	positive regulation of protein polyubiqu...	6	1	0.04	157	0.04359	0.04359	1	1	Any process that activates or increases the frequency, rate or extent of protein polyubiquitination	0.14054	0.14054	SKP2, XIAP
GO:0048523	negative regulation of cellular process	2465	25	18.24	1302	0.04379	0.54248	1	1	Any process that stops, prevents, or reduces the frequency, rate or extent of a cellular process, any of those that are carried out at the cellular level, but are not necessarily restricted to a single cell. For example, cell communication occurs among more than one cell, but occurs at the cellular level	1.18927	-1.65927	ADAMTS1, LRP8, KAT6A, RNF6, SKIL, KLF12, CERS2, PSMA6, KIF14, NPAT, H3F3A, VPS13C, TAX1BP3, C1D, SOD2, SH3RF1, MEX3D, SOCS7, TOB2, ZBTB18, CDYL, SH3RF2, PNPT1, ARHGAP35, BIRC6, CREBZF, ANAPC7, VILL, TAF9B, WFDC3, PRKAA1, KLF16, MTPN, KREMEN1, ATXN7, CYR61, PDE8A, AHR, TIE1, PRKCE, CDK9, HMG20A, HES6, FIGNL1, SOCS4, UBC, BAHD1, CCAR1, LTBP1, BRCA1, GFI1, PIDD1, TBX2, GON4L, RTF1, MYO5A, CCNK, RASS…	ITGB1, FAM220A, PSMD5, ZNF675, HAT1, OMA1, PPT1, THRB, UBE2D3, TERF2IP, MTBP, DVL3, LYPLA1, EPC1, RNASEH2B, RNF2, NRK, UCHL5, PSMD12, USP25, NOV, EIF3E, HIGD1A, NFE2L2, PDCD10, PTPN12, SNX13, CREB1, SIN3A, MARCH7, MPHOSPH10, LRRC17, PFN2, PIK3R1, RHOQ, ITM2B, MAP2K4, INTS7, DYRK1A, ADNP, ZMYND11, GPAM, ZNF224, ZBTB1, BUB1, PCNA, BAZ2A, PRKACB, YWHAZ, SYF2, IRF2, FMN2, LYN, TMF1, LY96, SPP1, NFIL3…
GO:1901566	organonitrogen compound biosynthetic pro...	954	12	7.06	1715	0.04493	0.95805	1	1	The chemical reactions and pathways resulting in the formation of organonitrogen compound	0.886106	-1.43723	CERS2, GPC2, MEX3D, GTF2H3, ADSS, SECISBP2L, PRKAA1, MTPN, CYR61, RPSA, PSPH, CSGALNACT2, MC1R, PXYLP1, EIF2B1, MRAP, ST3GAL2, RPL31, DEGS1, RFK, IGFBP5, TNRC6B, SERP1, UMPS, RPS10, DDX6, LARP4, RPS21, NAGS, MRPL54, PDXK, GGT7, NME3, RPS19, GPT2, RPL41, FOXO3, DCK, MRPS21, ST3GAL5, RPL21, DAPK3, DNAJC3, UQCC2, RPS29, RPS8, FLCN, RPL10, RPS12, RPL35A, RPL22L1, EIF1AX, CPOX, PTBP1, SARS2, RPL37A, C…	EXTL2, PPCS, ATP5F1EP2, RPL39, MRPS30, EIF3M, GSPT1, LINC02210-CRHR1, EIF3E, NFE2L2, AZIN1, PAIP1, AASDH, PRKD3, ADNP, GSPT2, RPL15, MRPL3, EIF2AK2, MRPL1, LUM, CSNK2A2, NCK1, IARS, FAM129A, EIF2A, PPP1R15B, ARG2, NPM1, GCH1, IREB2, PUM2, EIF1B, NAMPT, EEF1E1, C12orf65, RARS, ESD, CAPRIN1, EIF3J, CALM2, HS2ST1, LCMT2, DARS2, SLC35B3, EGFR, EIF3H, ATP5F1C, MOCS2, DDX5, VAPA, HNRNPR, RMND1, MTIF3, …
GO:0000165	MAPK cascade	445	7	3.29	1383	0.04517	0.5942	1	1	An intracellular protein kinase cascade containing at least a MAPK, a MAPKK and a MAP3K. The cascade can also contain two additional tiers: the upstream MAP4K and the downstream MAP Kinase-activated kinase (MAPKAPK). The kinases in each tier phosphorylate and activate the kinases in the downstream tier to transmit a signal within a cell	0.90995	-1.29793	FGFR3, PSMA6, SH3RF1, CARD9, ADAM9, TIAM1, PRKAA1, CHUK, CYR61, PDE8A, PRKCE, UBC, NRAS, RASSF2, SMAD4, KRAS, TRIM5, AKAP13, MEF2D, KISS1, CDH2, DUSP10, MADD, TGFBR1, FOXM1, CDK1, MARK3, FLCN, SEMA7A, MAGED1, S1PR2, PTPRJ, ASH1L, ATF3, MAP2K3, CRKL, MAP3K15, STK40, EFNA1, APIP, HMGCR, RPS27A, EZR, IRS1, ERP29, IRAK2, JUN, XDH, IKBKG, EDN1, TIMP3, CSPG4, RAPGEF1, RANBP9, PDGFRB, TGFB1, HRAS, F2R, …	PSMD5, ZNF675, DVL3, NRK, PSMD12, PDCD10, MAP2K4, ZMYND11, VRK2, LYN, RASGRF1, EIF2AK2, PSMA1, RASA1, UBE2N, PSMC6, PDGFRA, ATP6AP2, SDCBP, HSPH1, TAB2, CALM2, ARL6IP5, PSMA4, EGFR, AIDA, HIPK3, MAP3K20, IQGAP3, RAP1B, LAMTOR3, MAPK8, DNAJA1, MBIP, GPS2, OXTR, FGF13, JAK1, SYNJ2BP, GRIN2D, IQGAP1, RGS2, PSMD14, PIK3CB, SHC1, MED1, HACD3, ERN1, RAPGEF2, PSMD6, STK3, NPTN, BMP4, AKAP9, MET, TAOK3, …
GO:0006383	transcription from RNA polymerase III pr...	46	2	0.34	158	0.04529	0.04529	1	1	The synthesis of RNA from a DNA template by RNA polymerase III, originating at an RNAP III promoter	0.508041	-0.301604	POLR3K, BRCA1, POLR3G, SNAPC1, ELL	IVNS1ABP
GO:0021766	hippocampus development	46	2	0.34	823	0.04529	0.28095	1	1	The progression of the hippocampus over time from its initial formation until its mature state	0.57691	-0.518431	LRP8, KIF14, GSK3B, UQCRQ, CASP3	TENT2, FGF13, ATP2B4, CDK6, NCOA1
GO:0042255	ribosome assembly	46	2	0.34	1815	0.04529	1	1	1	The aggregation, arrangement and bonding together of the mature ribosome and of its subunits	0.50176	-0.713186	RPSA, RPS10, RPS19, RPL10, NOP53, DDX28, RPS27L	RPF1, BRIX1, EIF2A, NPM1, SBDS, MTERF3, FASTKD2, RRP7BP
GO:0071103	DNA conformation change	182	4	1.35	159	0.04538	0.04538	1	1	A cellular process that results in a change in the spatial configuration of a DNA molecule. A conformation change can bend DNA, or alter the, twist, writhe, or linking number of a DNA molecule	0.842676	-1.04578	KAT6A, IPO4, H3F3A, GTF2H3, UBC, BAHD1, HIST1H2BJ, DNA2, KNL1, GINS1, KAT6B, TNRC18, TOP2A, CDK1, MIS18BP1, ASH1L, HJURP, H1FX, TSPYL4, HHEX, RPS27A, CHMP1A, GTF2H2, PHF13, MCM2, SPTY2D1, SIRT6, AKAP8, TWNK	CETN2, HAT1, ITGB3BP, CENPQ, NAP1L1, NUSAP1, NPM1, CENPI, SMC4, GTF2H1, SET, SRPK1, HIST2H2BE, RBBP4, SUPV3L1, HMGB3, HMGA2, HIST1H2BC, CENPK, CENPU
GO:0016310	phosphorylation	1288	15	9.53	1201	0.04585	0.47933	1	1	The process of introducing a phosphate group into a molecule, usually with the formation of a phosphoric ester, a phosphoric anhydride or a phosphoric amide	1.11999	-1.38262	FAM126A, LRP8, FGFR3, PSMA6, KIF14, IPPK, SH3RF1, CARD9, SOCS7, ADAM9, GTF2H3, PI4K2B, TIAM1, SMAD5, BIRC6, CDK19, UQCRHL, PRKAA1, CHUK, ATXN7, CYR61, PDE8A, NDUFA11, TIE1, PRKCE, CDK9, LIMK2, SOCS4, UBC, TRIO, NRAS, CDC42BPB, RFK, CDK8, CCNK, RASSF2, SMAD4, TTBK2, NDUFA2, PPM1F, KRAS, PRKAR1B, BPNT1, TRIM5, ELP3, AKAP13, NDUFB2, MECP2, ETNK2, OSBPL8, MEF2D, KISS1, MIDN, PFKFB4, CDH2, ADCK5, VAV2…	PSMD5, ZNF675, TERF2IP, DVL3, SNRK, NRK, PSMD12, PDCD10, CREB1, CCNG1, PFN2, PIK3R1, MAP2K4, PRKD3, DYRK1A, ADNP, ZMYND11, BUB1, PRKACB, UQCRB, VRK2, HSP90AA1, LYN, PTGES3, RASGRF1, PPP2R3C, EIF2AK2, PSMA1, RASA1, UBE2N, CSNK2A2, MSH2, NCK1, FAM129A, EIF2A, PPP1R15B, NPM1, FASTKD3, GPRC5B, PSMC6, PRNP, NDUFS1, PDGFRA, ATP6AP2, AC068234.1, RPS6KC1, SDCBP, HSPH1, TAB2, CALM2, STRAP, ARL6IP5, MNAT1,…
GO:0044700	single organism signaling	2852	28	21.1	1153	0.04601	0.45756	1	1	A signaling process occurring within a single organism	1.40242	-1.67632	SPNS2, FAM126A, ADAMTS1, AKAP10, LRP8, KAT6A, LRRC40, AL928654.3, TMEM65, RNF6, INPP4B, SKP2, FGFR3, SKIL, ARHGAP18, PSMA6, KIF14, GPC2, EGLN2, TAX1BP3, SNAP29, SOD2, SH3RF1, CNPY2, CARD9, SOCS7, TSPAN9, ADAM9, POFUT1, ARHGAP35, TIAM1, SMAD5, BIRC6, SYTL3, RXRB, SLC12A2, TAF9B, FCHSD2, PRKAA1, KLF16, CHUK, LIN7C, KREMEN1, DTX4, ATXN7, DOCK1, CYR61, PDE8A, AHR, ARPC1B, TAF4, EPS8L1, TIE1, PRKCE, L…	ITGB1, GEM, PSMD5, ATP2C1, ZNF675, ASB3, PPT1, THRB, UBE2D3, TERF2IP, ARRDC3, XPR1, DVL3, PLPP5, LINC02210-CRHR1, SNRK, NRK, SEC31A, PSMD12, NOV, NFE2L2, PDCD10, SLC9A6, PTPN12, SNX13, CREB1, HPSE, PFN2, TAF5, ARPC5, KIAA0586, PIK3R1, RHOQ, MAP2K4, PRKD3, INTS6, DYRK1A, DST, CPE, ADNP, SH3BGRL, ZMYND11, ITGB3BP, ASB14, MBTPS2, GNG5, PCNA, PRKACB, YWHAZ, VRK2, HSP90AA1, IRF2, FMN2, LYN, TMF1, LY96…
GO:0007411	axon guidance	109	3	0.81	160	0.04661	0.04661	1	1	The chemotaxis process that directs the migration of an axon growth cone to a specific target site in response to a combination of attractive and repulsive cues	0.60163	-0.738213	ARHGAP35, NRAS, SMAD4, KRAS, LAMA2, FAM129B, GAB2, NEO1, B4GAT1, SIAH1, EZR, CELSR3, NFIB, RANBP9, HRAS	CREB1, PIK3R1, ENAH, OPHN1, ISL1, RPS6KA5, PIK3CB, SHC1, MATN2, RYK, ISL2, ROBO1, SEMA3C, WNT5A, MYH10, CHN1, APP, SRC
GO:0097485	neuron projection guidance	109	3	0.81	161	0.04661	0.04661	1	1	The process in which the migration of a neuron projection is directed to a specific target site in response to a combination of attractive and repulsive cues	0.60163	-0.738213	ARHGAP35, NRAS, SMAD4, KRAS, LAMA2, FAM129B, GAB2, NEO1, B4GAT1, SIAH1, EZR, CELSR3, NFIB, RANBP9, HRAS	CREB1, PIK3R1, ENAH, OPHN1, ISL1, RPS6KA5, PIK3CB, SHC1, MATN2, RYK, ISL2, ROBO1, SEMA3C, WNT5A, MYH10, CHN1, APP, SRC
GO:1902115	regulation of organelle assembly	109	3	0.81	162	0.04661	0.04661	1	1	Any process that modulates the frequency, rate or extent of organelle assembly	0.650214	-0.707313	ARHGAP35, BRCA1, SMAD4, AKAP13, TBC1D14, STX18, CEP135, CCP110, STAM, SEPT9, RDX, HTT, CROCC, CHMP1A, EZR, MAP4, CYLD, RAB3GAP2, EDN1, RAB3GAP1	NPM1, SDCBP, CHMP2B, ATG5, SENP6, SH3GLB1, SCFD1, MDM1, CCSAP, DYNC2LI1, SYNE2, CNOT2, CNOT1, PDCD6IP, VPS11, CEP120, BECN1, SRC
GO:0009205	purine ribonucleoside triphosphate metab...	187	4	1.38	961	0.04927	0.35366	1	1	The chemical reactions and pathways involving purine ribonucleoside triphosphate, a compound consisting of a purine base linked to a ribose sugar esterified with triphosphate on the sugar	0.6889	-0.925725	UQCRHL, PRKAA1, NDUFA11, FIGNL1, NDUFA2, NDUFB2, MECP2, PFKFB4, NME3, CDK1, UQCC2, PARG, FLCN, NDUFB6, NDUFA9, HIF1A, UQCRQ, COX10, TSPO, ITPA, IMPDH1, SIRT6, TGFB1, TAZ	ATP5F1EP2, RHOQ, UQCRB, DNM1L, MSH2, NDUFS1, AP003108.2, ATP5F1C, MOCS2, MBIP, PMPCB, NDUFA12, AK3, BPGM, NFS1, GAPDH, HSPA8, NDUFB1, SLC25A13, NDUFA6, AK9

## Sheet: top 250 upreg
GO id	Term	Genes in genome (background)	Genes in top-250 upreg	Expected genes in top-250 upreg	Rank in P.Fisher.elim	P.Fisher	P.Fisher.elim	FDR.Fisher	FDR.Fisher.elim	Description	Avg.LogFC for top-10 upreg	Avg.LogFC for top-10 downreg	Upreg genes (LogFC > 0.4)	Downreg genes (LogFC < -0.4)
GO:0006614	SRP-dependent cotranslational protein ta...	93	14	2.2	1	3.2e-08	3.2e-08	0.000257143	0.00032	The targeting of proteins to a membrane that occurs during translation and is dependent upon two key components, the signal-recognition particle (SRP) and the SRP receptor. SRP is a cytosolic particle that transiently binds to the endoplasmic reticulum (ER) signal sequence in a nascent protein, to the large ribosomal unit, and to the SRP receptor in the ER membrane	0.614268	-0.820599	RPSA, RPL31, RPS10, RPS21, RPS19, RPL41, RPL21, RPS29, RPS8, RPL10, RPS12, RPL35A, RPL37A, RPS27A, RPS23, RPL34, RPLP2	SRP19, RPL39, RPL15, RPL36A, SRP72, SRP54, SRP14, RPL17-C18orf32, RPL17, RPL9, SRP9
GO:0006613	cotranslational protein targeting to mem...	98	14	2.32	3292	6.4e-08	1	0.000257143	1	The targeting of proteins to a membrane that occurs during translation. The transport of most secretory proteins, particularly those with more than 100 amino acids, into the endoplasmic reticulum lumen occurs in this manner, as does the import of some proteins into mitochondria	0.614268	-0.820599	RPSA, RPL31, RPS10, RPS21, RPS19, RPL41, RPL21, RPS29, RPS8, RPL10, RPS12, RPL35A, RPL37A, RPS27A, RPS23, RPL34, RPLP2	SRP19, RPL39, RPL15, RPL36A, SRP72, SRP54, SRP14, RPL17-C18orf32, RPL17, RPL9, SRP9
GO:0045047	protein targeting to ER	102	14	2.42	3293	1.1e-07	1	0.000257143	1	The process of directing proteins towards the endoplasmic reticulum (ER) using signals contained within the protein. One common mechanism uses a 16- to 30-residue signal sequence, typically located at the N-terminus of the protein and containing positively charged amino acids followed by a continuous stretch of hydrophobic residues, which directs the ribosome to the ER membrane and initiates tran…	0.614268	-0.823249	RPSA, RPL31, RPS10, RPS21, RPS19, RPL41, RPL21, RPS29, RPS8, RPL10, RPS12, RPL35A, RPL37A, RPS27A, RPS23, RPL34, RPLP2	SRP19, RPL39, RPL15, RPL36A, SRP72, SRP54, SRP14, SPCS2, RPL17-C18orf32, RPL17, RPL9, SRP9
GO:0000184	nuclear-transcribed mRNA catabolic proce...	119	15	2.82	2	1.2e-07	1.2e-07	0.000257143	0.0006	The nonsense-mediated decay pathway for nuclear-transcribed mRNAs degrades mRNAs in which an amino-acid codon has changed to a nonsense codon; this prevents the translation of such mRNAs into truncated, and potentially harmful, proteins	0.614268	-0.94935	RPSA, RPL31, RPS10, RPS21, RPS19, RPL41, RPL21, RPS29, RPS8, RPL10, RPS12, RPL35A, RPL37A, RPS27A, RPS23, RPL34, RPLP2	RPL39, GSPT1, EIF3E, GSPT2, RPL15, UPF2, PPP2R2A, RPL36A, PNRC2, RPL17-C18orf32, RPL17, RPL9, PABPC1, SMG8
GO:0070972	protein localization to endoplasmic reti...	121	15	2.87	2079	1.5e-07	0.46904	0.000257143	1	A process in which a protein is transported to, or maintained in, a location within the endoplasmic reticulum	0.614268	-0.924961	RPSA, RPL31, RPS10, RPS21, RPS19, RPL41, RPL21, RPS29, RPS8, RPL10, RPS12, RPL35A, RPL37A, RPS27A, UBAC2, RPS23, RPL34, RAB3GAP2, HSPA5, RPLP2, KDELR2, RAB3GAP1	SRP19, RPL39, RPL15, KDELR3, RTN4, VAPA, RPL36A, SRP72, SRP54, SRP14, RAB10, SPCS2, RPL17-C18orf32, RPL17, RPL9, SRP9
GO:0072599	establishment of protein localization to...	105	14	2.49	3294	1.6e-07	1	0.000257143	1	The directed movement of a protein to a specific location in the endoplasmic reticulum	0.614268	-0.830397	RPSA, RPL31, RPS10, RPS21, RPS19, RPL41, RPL21, RPS29, RPS8, RPL10, RPS12, RPL35A, RPL37A, RPS27A, RPS23, RPL34, RAB3GAP2, RPLP2, RAB3GAP1	SRP19, RPL39, RPL15, RPL36A, SRP72, SRP54, SRP14, RAB10, SPCS2, RPL17-C18orf32, RPL17, RPL9, SRP9
GO:0006413	translational initiation	177	18	4.19	3	1.8e-07	1.8e-07	0.000257143	0.0006	The process preceding formation of the peptide bond between the first two amino acids of a protein. This includes the formation of a complex of the ribosome, mRNA, and an initiation complex that contains the first aminoacyl-tRNA	0.635395	-1.10929	RPSA, EIF2B1, RPL31, RPS10, RPS21, RPS19, RPL41, RPL21, DNAJC3, RPS29, RPS8, RPL10, RPS12, RPL35A, EIF1AX, PTBP1, RPL37A, RPS27A, RPS23, RPL34, EIF2AK4, AGO2, EIF2S2, RPLP2, EIF4G3, YTHDF1	RPL39, EIF3M, EIF3E, PAIP1, RPL15, EIF2AK2, NCK1, EIF2A, PPP1R15B, NPM1, EIF1B, EIF3J, EIF3H, MTIF3, RPL36A, ALKBH1, FMR1, YAE1D1, SSB, EIF4B, EIF4E, C8orf88, RPS6KB1, RPL17-C18orf32, EIF4H, RPL17, RPL9, GLE1, MTFMT, ABCE1, EIF5, EIF4A2, PABPC1, DHX29, EIF2B2
GO:0006612	protein targeting to membrane	153	15	3.63	2830	3.1e-06	0.74313	0.00377778	1	The process of directing proteins towards a membrane, usually using signals contained within the protein	0.629271	-0.94865	RPSA, RPL31, RAB8B, RPS10, RPS21, RPS19, RPL41, RPL21, RPS29, RPS8, RPL10, RPS12, RPL35A, RPL37A, MIEF1, RPS27A, RPS23, RPL34, MIEF2, PEX5, ATG4B, RPLP2, PACS2	SRP19, RPL39, RPL15, PEX3, NUP54, PRNP, SDCBP, GOLGA7, MFF, RPL36A, SRP72, SRP54, SRP14, RPL17-C18orf32, RPL17, RPL9, SRP9, ATG4A, MTCL1
GO:0019080	viral gene expression	174	16	4.12	159	3.4e-06	0.02425	0.00377778	1	A process by which a viral gene is converted into a mature gene product or products (proteins or RNA). This includes viral transcription, processing to produce a mature RNA product, and viral translation	0.636423	-0.935306	RPSA, CDK9, RPL31, RPS10, RPS21, RPS19, RPL41, RPL21, RPS29, RPS8, RPL10, RPS12, RPL35A, TFAP4, PTBP1, RPL37A, TRIM32, RPS27A, JUN, RPS23, RPL34, POM121C, EIF2AK4, RPLP2, RAE1, CTDP1	RPL39, GTF2B, RPL15, NUP35, TRIM13, NUPL2, NUP54, GTF2F2, NUP37, NUP205, RPL36A, NUP88, SSB, ZNF639, RPL17-C18orf32, RPL17, RPL9, HMGA2, POLR2A, TRIM21, NUP43, CCNT1, SP1
GO:0006402	mRNA catabolic process	204	17	4.83	2387	6.4e-06	0.56841	0.0064	1	The chemical reactions and pathways resulting in the breakdown of mRNA, messenger RNA, which is responsible for carrying the coded genetic 'message', transcribed from DNA, to sites of protein assembly at the ribosomes	0.717965	-1.13402	EXOSC6, PNPT1, RPSA, RPL31, TNRC6B, RPS10, DDX6, RPS21, RPS19, ZHX2, RPL41, LSM5, EDC3, RPL21, RPS29, RPS8, RPL10, RPS12, RPL35A, THRAP3, RPL37A, RPS27A, RPS23, RPL34, AGO2, RPLP2	RPL39, GSPT1, EIF3E, TENT2, DIS3, PAIP1, GSPT2, RPL15, UPF2, TTC37, EXOSC3, DDX5, LSM1, HNRNPR, PPP2R2A, RPL36A, FMR1, ZC3HAV1, SSB, PATL1, EIF4B, EIF4E, PNRC2, CNOT2, RPL17-C18orf32, RC3H1, ERN1, RPL17, RPL9, CNOT1, SUPV3L1, EXOSC9, HBS1L, EIF4A2, PABPC1, ZFP36L1, SMG8
GO:0000956	nuclear-transcribed mRNA catabolic proce...	189	16	4.48	2950	9.8e-06	0.79467	0.00890909	1	The chemical reactions and pathways resulting in the breakdown of nuclear-transcribed mRNAs in eukaryotic cells	0.686534	-1.13402	EXOSC6, RPSA, RPL31, TNRC6B, RPS10, DDX6, RPS21, RPS19, RPL41, LSM5, EDC3, RPL21, RPS29, RPS8, RPL10, RPS12, RPL35A, THRAP3, RPL37A, RPS27A, RPS23, RPL34, AGO2, RPLP2	RPL39, GSPT1, EIF3E, TENT2, DIS3, PAIP1, GSPT2, RPL15, UPF2, TTC37, EXOSC3, DDX5, LSM1, PPP2R2A, RPL36A, SSB, PATL1, EIF4B, EIF4E, PNRC2, CNOT2, RPL17-C18orf32, RC3H1, RPL17, RPL9, CNOT1, EXOSC9, HBS1L, EIF4A2, PABPC1, ZFP36L1, SMG8
GO:0044033	multi-organism metabolic process	192	16	4.55	751	1.2e-05	0.13793	0.01	1	A metabolic process - chemical reactions and pathways, including anabolism and catabolism, by which living organisms transform chemical substances - which involves more than one organism	0.639355	-0.977978	RPSA, CDK9, RPL31, RPS10, RPS21, RPS19, RPL41, TOP2A, RPL21, RPS29, RPS8, RPL10, RPS12, RPL35A, TFAP4, MAP2K3, PTBP1, RPL37A, TRIM32, RPS27A, JUN, RPS23, RPL34, POM121C, EIF2AK4, RPLP2, RAE1, MAP2K1, CTDP1	RPL39, MAP2K4, GTF2B, RPL15, NUP35, TRIM13, NUPL2, NUP54, GTF2F2, NUP37, ATG5, NUP205, RPL36A, NUP88, FMR1, SSB, ZNF639, RPL17-C18orf32, RPL17, RPL9, HMGA2, POLR2A, TRIM21, NUP43, CCNT1, SP1
GO:0006401	RNA catabolic process	225	17	5.33	2711	2.3e-05	0.68822	0.0176923	1	The chemical reactions and pathways resulting in the breakdown of RNA, ribonucleic acid, one of the two main type of nucleic acid, consisting of a long, unbranched macromolecule formed from ribonucleotides joined in 3',5'-phosphodiester linkage	0.742402	-1.26601	EXOSC6, PNPT1, RPSA, POP1, RPL31, DNA2, TNRC6B, RPS10, DDX6, RPS21, RPS19, ZHX2, RPL41, LSM5, EDC3, RPL21, RPS29, RPS8, RPL10, RPS12, RPL35A, THRAP3, RPL37A, RPS27A, RPS23, RPL34, AGO2, RPLP2	RPL39, MTREX, GSPT1, RNASEH2B, EIF3E, TENT2, DIS3, PAIP1, GSPT2, RPL15, UPF2, TTC37, EXOSC3, DDX5, LSM1, HNRNPR, PPP2R2A, RPL36A, FMR1, ZC3HAV1, SSB, PATL1, EIF4B, EIF4E, PNRC2, CNOT2, RPL17-C18orf32, RC3H1, ERN1, RPL17, RPL9, CNOT1, SUPV3L1, EXOSC9, HBS1L, EIF4A2, PABPC1, DEDD2, ZFP36L1, HNRNPD, SMG8
GO:0019083	viral transcription	163	14	3.86	4	3.1e-05	3.1e-05	0.02	0.0775	The process by which a viral genome, or part of a viral genome, is transcribed within the host cell	0.636423	-0.935306	RPSA, CDK9, RPL31, RPS10, RPS21, RPS19, RPL41, RPL21, RPS29, RPS8, RPL10, RPS12, RPL35A, TFAP4, RPL37A, TRIM32, RPS27A, JUN, RPS23, RPL34, POM121C, RPLP2, RAE1, CTDP1	RPL39, GTF2B, RPL15, NUP35, TRIM13, NUPL2, NUP54, GTF2F2, NUP37, NUP205, RPL36A, NUP88, ZNF639, RPL17-C18orf32, RPL17, RPL9, HMGA2, POLR2A, TRIM21, NUP43, CCNT1, SP1
GO:0072657	protein localization to membrane	380	23	9.01	951	3.1e-05	0.19204	0.02	1	A process in which a protein is transported to, or maintained in, a specific location in a membrane	0.857377	-1.30657	FAM126A, TIAM1, TUB, LIN7C, RPSA, PRKCE, RPL31, MYO5A, RAB26, RAB8B, RPS10, RPS21, CDH2, EFR3A, AP3D1, RPS19, RPL41, RPL21, RPS29, RPS8, RPL10, RPS12, RPL35A, PIGW, TOMM7, PPP2R5A, IFT122, SCRIB, ARHGAP44, ARF6, RPL37A, RER1, PPP3R1, MIEF1, RDX, PKDCC, MPP5, CNST, RAMP1, RPS27A, EZR, RPS23, RPL34, MIEF2, KIF13A, PEX5, YWHAG, RAB3GAP2, ATG4B, RPLP2, PACS2, TGFB1, TSPAN14, RAB3GAP1	ITGB1, SRP19, RPL39, LYPLA1, PIK3R1, RHOQ, CPE, RPL15, YWHAZ, HSP90AA1, TMEM59, PEX3, NUP54, RAB11A, EPB41L3, PRNP, SDCBP, CALM2, YWHAH, BLZF1, EGFR, VAMP3, BBIP1, GOLGA7, MFF, SH3GLB1, RPL36A, SRP72, MAPK8, SRP54, FGF13, SRP14, HSPA4, RAB10, RPL17-C18orf32, RAPGEF2, RPL17, RPL9, SRP9, FNTA, ATG4A, MTCL1, RAB8A, RAB31, PDZD11, EMP2, PKP2
GO:0006364	rRNA processing	231	17	5.47	5	3.2e-05	0.00031	0.02	0.566667	Any process involved in the conversion of a primary ribosomal RNA (rRNA) transcript into one or more mature rRNA molecules	0.714601	-1.1431	C1D, EXOSC6, RPSA, RPL31, RPS10, NSUN5P1, RPS21, RPS19, RPL41, RPL21, DHX37, RPS29, RPS8, RPL10, RPS12, RPL35A, FCF1, UTP11, RPL37A, NSUN5, RIOK2, RPS27A, NPM3, RRNAD1, RPS23, RPL34, RPLP2	RPL39, MTREX, RPF1, DIS3, MPHOSPH10, UTP3, RPL15, MRPL1, WDR75, DDX21, NOP58, SBDS, RRP15, HEATR1, EXOSC3, TRMT61B, RPL36A, THUMPD1, MRPS9, MAK16, UTP4, RPL17-C18orf32, FRG1, RPL17, RPL9, IMP4, NOL11, UTP15, EXOSC9, LTV1, RRP7BP
GO:0043604	amide biosynthetic process	580	30	13.75	921	3.9e-05	0.17964	0.0229412	1	The chemical reactions and pathways resulting in the formation of an amide, any derivative of an oxoacid in which an acidic hydroxy group has been replaced by an amino or substituted amino group	0.839603	-1.27627	CERS2, MEX3D, GTF2H3, SECISBP2L, PRKAA1, MTPN, CYR61, RPSA, EIF2B1, RPL31, DEGS1, IGFBP5, TNRC6B, SERP1, RPS10, DDX6, LARP4, RPS21, NAGS, MRPL54, GGT7, RPS19, RPL41, FOXO3, MRPS21, ST3GAL5, RPL21, DAPK3, DNAJC3, UQCC2, RPS29, RPS8, RPL10, RPS12, RPL35A, RPL22L1, EIF1AX, PTBP1, SARS2, RPL37A, RPS27A, MTHFD2, GTF2H2, TIA1, RPS23, RPS27L, RPL34, ORMDL3, EIF2AK4, AGO2, EIF2S2, RPLP2, CHCHD1, TRMT10C,…	RPL39, MRPS30, EIF3M, GSPT1, EIF3E, NFE2L2, PAIP1, AASDH, GSPT2, RPL15, MRPL3, EIF2AK2, MRPL1, NCK1, IARS, FAM129A, EIF2A, PPP1R15B, ARG2, NPM1, GCH1, IREB2, PUM2, EIF1B, EEF1E1, C12orf65, RARS, CAPRIN1, EIF3J, DARS2, EGFR, EIF3H, DDX5, HNRNPR, RMND1, MTIF3, RPL36A, ALKBH1, GARS, MRPS9, WARS2, TNRC6A, FMR1, YAE1D1, SSB, PRKRA, MALSU1, SPTSSA, DND1, RGS2, EIF4B, EIF4E, MRPS27, GGCT, TARS, C8orf88,…
GO:0019058	viral life cycle	340	21	8.06	567	5.3e-05	0.10436	0.0294444	1	A set of processes which all viruses follow to ensure survival; includes attachment and entry of the virus particle, decoding of genome information, translation of viral mRNA by host ribosomes, genome replication, and assembly and release of viral particles containing the genome	0.691636	-1.19147	RPSA, CDK9, UBC, RPL31, CCNK, TRIM5, RPS10, DDX6, RPS21, RPS19, LDLR, RPL41, TOP2A, TAP2, RPL21, RPS29, RPS8, RPL10, RPS12, RPL35A, TFAP4, NOTCH1, TAP1, PTBP1, RPL37A, MAVS, P4HB, TRIM32, SIVA1, RPS27A, CHMP1A, JUN, RPS23, RPL34, CHMP7, POM121C, EIF2AK4, KPNA1, RPLP2, RAE1, TNIP1, CTDP1	ITGB1, RPL39, XPR1, GTF2B, RPL15, EIF2AK2, VPS37A, VTA1, SNX3, NUP35, TRIM13, NUPL2, NUP54, GTF2F2, AC068234.1, WWP1, KPNA3, CHMP2B, OAS3, FAM111A, NUP37, ATG5, DDX5, VAPA, NUP205, RPL36A, RAB1A, NUP88, FMR1, DERL1, ZC3HAV1, SRPK1, SSB, ZNF639, CHMP3, HACD3, RPL17-C18orf32, YTHDC2, RPL17, RPL9, AXL, KPNA4, THOC2, HSPA8, PDCD6IP, HMGA2, POLR2A, PABPC1, SRPK2, RAB7A, TRIM21, PPIA, PPID, APOBEC3C, N…
GO:0034655	nucleobase-containing compound catabolic...	297	19	7.04	2381	7.6e-05	0.56366	0.04	1	The chemical reactions and pathways resulting in the breakdown of nucleobases, nucleosides, nucleotides and nucleic acids	0.757411	-1.26601	EXOSC6, PNPT1, PDE8A, RPSA, POP1, RPL31, DNA2, TNRC6B, DCTPP1, RPS10, DDX6, RPS21, RPS19, ZHX2, RPL41, LSM5, EDC3, RPL21, RPS29, RPS8, RPL10, SAMHD1, RPS12, RPL35A, THRAP3, RPL37A, PDE7A, DPYD, RPS27A, NUDT18, ITPA, RPS23, RPL34, XDH, AGO2, KPNA1, RPLP2, CASP3, NEIL2, NT5C3A	RPL39, MTREX, GSPT1, RNASEH2B, EIF3E, TENT2, DIS3, PAIP1, GSPT2, RPL15, TATDN1, UPF2, TTC37, EXOSC3, DDX5, LSM1, HNRNPR, PPP2R2A, RPL36A, FMR1, ZC3HAV1, SSB, UNG, PATL1, EIF4B, EIF4E, SETMAR, PNRC2, CNOT2, RPL17-C18orf32, HPRT1, RC3H1, ERN1, NT5E, RPL17, RPL9, CNOT1, SUPV3L1, MBD4, NUDT12, EXOSC9, HBS1L, EIF4A2, PABPC1, DEDD2, OGG1, ZFP36L1, SMPDL3A, HNRNPD, SMG8, EGLN1, APOBEC3C
GO:0006412	translation	520	27	12.32	1595	9.2e-05	0.34567	0.046	1	The cellular metabolic process in which a protein is formed, using the sequence of a mature mRNA molecule to specify the sequence of amino acids in a polypeptide chain. Translation is mediated by the ribosome, and begins with the formation of a ternary complex between aminoacylated initiator methionine tRNA, GTP, and initiation factor 2, which subsequently associates with the small subunit of the…	0.77609	-1.24102	MEX3D, GTF2H3, SECISBP2L, MTPN, RPSA, EIF2B1, RPL31, IGFBP5, TNRC6B, SERP1, RPS10, DDX6, LARP4, RPS21, MRPL54, RPS19, RPL41, FOXO3, MRPS21, RPL21, DAPK3, DNAJC3, UQCC2, RPS29, RPS8, RPL10, RPS12, RPL35A, RPL22L1, EIF1AX, PTBP1, SARS2, RPL37A, RPS27A, GTF2H2, TIA1, RPS23, RPS27L, RPL34, EIF2AK4, AGO2, EIF2S2, RPLP2, CHCHD1, TRMT10C, EIF4G3, SMAD3, MRPL44, CELF1, YTHDF1, TGFB1, MRPL46, MAP2K1, TNIP1	RPL39, MRPS30, EIF3M, GSPT1, EIF3E, PAIP1, GSPT2, RPL15, MRPL3, EIF2AK2, MRPL1, NCK1, IARS, FAM129A, EIF2A, PPP1R15B, NPM1, IREB2, PUM2, EIF1B, EEF1E1, C12orf65, RARS, CAPRIN1, EIF3J, DARS2, EGFR, EIF3H, DDX5, HNRNPR, RMND1, MTIF3, RPL36A, ALKBH1, GARS, MRPS9, WARS2, TNRC6A, FMR1, YAE1D1, SSB, PRKRA, MALSU1, DND1, RGS2, EIF4B, EIF4E, MRPS27, TARS, C8orf88, RPS6KB1, AC079447.1, CNOT2, RPL17-C18orf…
GO:0016072	rRNA metabolic process	257	17	6.09	3295	0.00012	1	0.0571429	1	The chemical reactions and pathways involving rRNA, ribosomal RNA, a structural constituent of ribosomes	0.714601	-1.1431	C1D, EXOSC6, RPSA, RPL31, RPS10, NSUN5P1, RPS21, RPS19, RPL41, RPL21, DHX37, RPS29, RPS8, RPL10, RNASEK, RPS12, RPL35A, FCF1, UTP11, RPL37A, NSUN5, RIOK2, RPS27A, NPM3, RRNAD1, RPS23, RPL34, RPLP2, CD3EAP	RPL39, MTREX, RPF1, DIS3, MPHOSPH10, UTP3, RPL15, MRPL1, WDR75, DDX21, NOP58, SBDS, RRP15, HEATR1, NIFK, EXOSC3, TRMT61B, RPL36A, THUMPD1, MRPS9, MAK16, UTP4, RPL17-C18orf32, FRG1, RPL17, RPL9, IMP4, NOL11, UTP15, EXOSC9, DEDD2, LTV1, RRP7BP
GO:0043043	peptide biosynthetic process	534	27	12.66	1768	0.00014	0.38992	0.0636364	1	The chemical reactions and pathways resulting in the formation of peptides, compounds of 2 or more (but usually less than 100) amino acids where the alpha carboxyl group of one is bound to the alpha amino group of another. This may include the translation of a precursor protein and its subsequent processing into a functional peptide	0.77609	-1.27627	MEX3D, GTF2H3, SECISBP2L, MTPN, RPSA, EIF2B1, RPL31, IGFBP5, TNRC6B, SERP1, RPS10, DDX6, LARP4, RPS21, MRPL54, GGT7, RPS19, RPL41, FOXO3, MRPS21, RPL21, DAPK3, DNAJC3, UQCC2, RPS29, RPS8, RPL10, RPS12, RPL35A, RPL22L1, EIF1AX, PTBP1, SARS2, RPL37A, RPS27A, GTF2H2, TIA1, RPS23, RPS27L, RPL34, EIF2AK4, AGO2, EIF2S2, RPLP2, CHCHD1, TRMT10C, EIF4G3, SMAD3, MRPL44, CELF1, YTHDF1, TGFB1, MRPL46, MAP2K1…	RPL39, MRPS30, EIF3M, GSPT1, EIF3E, NFE2L2, PAIP1, AASDH, GSPT2, RPL15, MRPL3, EIF2AK2, MRPL1, NCK1, IARS, FAM129A, EIF2A, PPP1R15B, NPM1, IREB2, PUM2, EIF1B, EEF1E1, C12orf65, RARS, CAPRIN1, EIF3J, DARS2, EGFR, EIF3H, DDX5, HNRNPR, RMND1, MTIF3, RPL36A, ALKBH1, GARS, MRPS9, WARS2, TNRC6A, FMR1, YAE1D1, SSB, PRKRA, MALSU1, DND1, RGS2, EIF4B, EIF4E, MRPS27, GGCT, TARS, C8orf88, RPS6KB1, AC079447.1…
GO:0046700	heterocycle catabolic process	314	19	7.44	2571	0.00016	0.63595	0.0695652	1	The chemical reactions and pathways resulting in the breakdown of heterocyclic compounds, those with a cyclic molecular structure and at least two different atoms in the ring (or rings)	0.779953	-1.26601	EXOSC6, PNPT1, FTCD, PDE8A, RPSA, POP1, RPL31, DNA2, TNRC6B, DCTPP1, RPS10, DDX6, RPS21, RPS19, ZHX2, RPL41, LSM5, EDC3, RPL21, RPS29, RPS8, RPL10, SAMHD1, RPS12, RPL35A, THRAP3, RPL37A, PDE7A, DPYD, RPS27A, NUDT18, ITPA, CARNMT1, RPS23, RPL34, XDH, AGO2, KPNA1, RPLP2, CASP3, NEIL2, NT5C3A	RPL39, MTREX, GSPT1, RNASEH2B, EIF3E, TENT2, DIS3, PAIP1, GSPT2, RPL15, TATDN1, HNMT, UPF2, TTC37, EXOSC3, DDX5, LSM1, HNRNPR, PPP2R2A, RPL36A, FMR1, ZC3HAV1, SSB, UNG, PATL1, EIF4B, EIF4E, SETMAR, PNRC2, CNOT2, RPL17-C18orf32, HPRT1, RC3H1, ERN1, NT5E, RPL17, RPL9, CNOT1, SUPV3L1, MBD4, NUDT12, EXOSC9, HBS1L, EIF4A2, PABPC1, DEDD2, OGG1, ZFP36L1, SMPDL3A, HNRNPD, SMG8, EGLN1, APOBEC3C
GO:0044270	cellular nitrogen compound catabolic pro...	315	19	7.47	2577	0.00017	0.63995	0.0708333	1	The chemical reactions and pathways resulting in the breakdown of organic and inorganic nitrogenous compounds	0.779953	-1.26601	EXOSC6, PNPT1, FTCD, PDE8A, RPSA, POP1, RPL31, DNA2, TNRC6B, DCTPP1, RPS10, DDX6, RPS21, RPS19, ZHX2, RPL41, LSM5, EDC3, RPL21, RPS29, RPS8, RPL10, SAMHD1, RPS12, RPL35A, THRAP3, TST, RPL37A, PDE7A, DPYD, RPS27A, NUDT18, ITPA, CARNMT1, RPS23, RPL34, XDH, AGO2, KPNA1, RPLP2, CASP3, NEIL2, NT5C3A	RPL39, MTREX, GSPT1, RNASEH2B, EIF3E, TENT2, DIS3, PAIP1, GSPT2, RPL15, TATDN1, HNMT, UPF2, TTC37, EXOSC3, DDX5, LSM1, HNRNPR, PPP2R2A, RPL36A, FMR1, ZC3HAV1, SSB, UNG, PATL1, EIF4B, EIF4E, SETMAR, PNRC2, CNOT2, RPL17-C18orf32, HPRT1, RC3H1, ERN1, NT5E, RPL17, RPL9, CNOT1, SUPV3L1, MBD4, NUDT12, EXOSC9, HBS1L, EIF4A2, PABPC1, DEDD2, OGG1, ZFP36L1, SMPDL3A, HNRNPD, SMG8, EGLN1, APOBEC3C
GO:0010629	negative regulation of gene expression	1086	44	25.74	325	0.00021	0.05783	0.084	1	Any process that decreases the frequency, rate or extent of gene expression. Gene expression is the process in which a gene's coding sequence is converted into a mature gene product or products (proteins or RNA). This includes the production of an RNA transcript as well as any processing to produce a mature RNA product or an mRNA (for protein-coding genes) and the translation of that mRNA into pr…	1.07857	-1.5208	LRP8, KAT6A, SKIL, KLF12, H3F3A, C1D, EXOSC6, CNPY2, MEX3D, ZBTB18, TSNAX, PNPT1, ARHGAP35, CREBZF, TAF9B, KLF16, RPSA, AHR, CDK9, HMG20A, HES6, NDFIP2, UBC, BAHD1, BRCA1, GFI1, RPL31, TBX2, GON4L, RTF1, IGFBP5, EGR1, SMAD4, TNRC6B, PPM1F, RPS10, DDX6, ATOH8, RPS21, MECP2, CBX6, MDM4, SUV39H2, KAT6B, TSC22D3, LGR4, SUFU, THRA, SCMH1, SUPT6H, TNRC18, JARID2, FNIP1, SBNO2, RPS19, LDLR, ZHX2, RPL41,…	FAM220A, ZNF675, HAT1, THRB, UBE2D3, RPL39, EPC1, GSPT1, RNASEH2B, RNF2, EIF3E, PDCD10, TENT2, CREB1, SIN3A, DIS3, PAIP1, DYRK1A, ADNP, ZMYND11, ZNF224, GSPT2, RPL15, ZBTB1, BAZ2A, IRF2, TMF1, NFIL3, KDM5A, STAT1, EIF2AK2, AKIRIN2, ZNF567, BTAF1, EED, COPS2, TMEM59, PTBP3, GLIS3, IKZF4, NCK1, SMURF2, UBA3, SUMO1, NUP35, RBAK, ZBTB33, TRIM13, NUPL2, IREB2, PUM2, AEBP2, NUP54, PRNP, TSN, BASP1, NR2…
GO:0019439	aromatic compound catabolic process	322	19	7.63	2649	0.00022	0.66719	0.0846154	1	The chemical reactions and pathways resulting in the breakdown of aromatic compounds, any substance containing an aromatic carbon ring	0.779953	-1.26601	EXOSC6, PNPT1, FTCD, PDE8A, RPSA, POP1, RPL31, DNA2, TNRC6B, DCTPP1, RPS10, DDX6, RPS21, RPS19, ZHX2, RPL41, LSM5, EDC3, RPL21, RPS29, RPS8, RPL10, SAMHD1, RPS12, RPL35A, THRAP3, RPL37A, PDE7A, DPYD, RPS27A, NUDT18, ITPA, CARNMT1, RPS23, RPL34, XDH, AGO2, KPNA1, RPLP2, CASP3, NEIL2, NT5C3A	RPL39, MTREX, GSPT1, RNASEH2B, EIF3E, TENT2, DIS3, PAIP1, GSPT2, RPL15, TATDN1, HNMT, UPF2, TTC37, EXOSC3, DDX5, LSM1, HNRNPR, PPP2R2A, RPL36A, FMR1, ZC3HAV1, SSB, UNG, PATL1, EIF4B, EIF4E, SETMAR, PNRC2, CNOT2, RPL17-C18orf32, HPRT1, RC3H1, ERN1, NT5E, RPL17, RPL9, CNOT1, SUPV3L1, MBD4, NUDT12, EXOSC9, HBS1L, EIF4A2, PABPC1, DEDD2, OGG1, ZFP36L1, SMPDL3A, HNRNPD, SMG8, EGLN1, APOBEC3C, PON2
GO:0090150	establishment of protein localization to...	302	18	7.16	2713	0.00029	0.69105	0.103571	1	The directed movement of a protein to a specific location in a membrane	0.772175	-1.29316	FAM126A, RPSA, RPL31, RAB26, RAB8B, RPS10, RPS21, CDH2, EFR3A, RPS19, RPL41, RPL21, RPS29, RPS8, RPL10, RPS12, RPL35A, TOMM7, PPP2R5A, SCRIB, ARHGAP44, ARF6, RPL37A, RER1, PPP3R1, MIEF1, RDX, PKDCC, MPP5, CNST, RPS27A, EZR, RPS23, RPL34, MIEF2, KIF13A, PEX5, YWHAG, RAB3GAP2, ATG4B, RPLP2, PACS2, TSPAN14, RAB3GAP1	ITGB1, SRP19, RPL39, LYPLA1, PIK3R1, RHOQ, RPL15, YWHAZ, HSP90AA1, TMEM59, PEX3, NUP54, RAB11A, PRNP, SDCBP, CALM2, YWHAH, BLZF1, EGFR, VAMP3, GOLGA7, MFF, RPL36A, SRP72, MAPK8, SRP54, SRP14, HSPA4, RAB10, RPL17-C18orf32, RPL17, RPL9, SRP9, ATG4A, MTCL1, RAB8A, RAB31, PKP2
GO:1901361	organic cyclic compound catabolic proces...	329	19	7.8	2723	0.00029	0.69299	0.103571	1	The chemical reactions and pathways resulting in the breakdown of organic cyclic compound	0.779953	-1.26601	EXOSC6, PNPT1, FTCD, PDE8A, RPSA, POP1, RPL31, DNA2, TNRC6B, DCTPP1, RPS10, DDX6, RPS21, RPS19, ZHX2, RPL41, LSM5, EDC3, RPL21, RPS29, RPS8, RPL10, SAMHD1, RPS12, RPL35A, THRAP3, RPL37A, PDE7A, DPYD, RPS27A, NUDT18, ITPA, CARNMT1, RPS23, RPL34, SNX17, XDH, AGO2, KPNA1, RPLP2, CASP3, NEIL2, NT5C3A	RPL39, MTREX, GSPT1, RNASEH2B, EIF3E, TENT2, DIS3, PAIP1, GSPT2, RPL15, SPP1, TATDN1, HNMT, UPF2, YWHAH, TTC37, EXOSC3, DDX5, LSM1, HNRNPR, PPP2R2A, RPL36A, FMR1, ZC3HAV1, SSB, HSD17B11, UNG, PATL1, EIF4B, EIF4E, SETMAR, PNRC2, CNOT2, RPL17-C18orf32, HPRT1, RC3H1, ERN1, NT5E, RPL17, RPL9, CNOT1, SUPV3L1, MBD4, NUDT12, EXOSC9, HBS1L, EIF4A2, PABPC1, DEDD2, OGG1, ZFP36L1, SMPDL3A, HNRNPD, SMG8, EGL…
GO:0042276	error-prone translesion synthesis	15	4	0.36	6	0.00034	0.00034	0.116129	0.566667	The conversion of DNA-damage induced single-stranded gaps into large molecular weight DNA after replication by using a specialized DNA polymerase or replication complex to insert a defined nucleotide across the lesion. This process does not remove the replication-blocking lesions and causes an increase in the endogenous mutation level. For example, in E. coli, a low fidelity DNA polymerase, pol V…	0.295254	-0.376784	UBC, RPA3, RFC1, RPS27A	POLE2, PCNA, RFC4
GO:0043408	regulation of MAPK cascade	334	19	7.92	1179	0.00035	0.23861	0.116129	1	Any process that modulates the frequency, rate or extent of signal transduction mediated by the MAP kinase (MAPK) cascade	0.872297	-1.19174	FGFR3, SH3RF1, CARD9, ADAM9, TIAM1, PRKAA1, CYR61, PDE8A, PRKCE, UBC, RASSF2, SMAD4, KRAS, TRIM5, AKAP13, KISS1, CDH2, DUSP10, MADD, TGFBR1, FOXM1, CDK1, FLCN, SEMA7A, MAGED1, S1PR2, PTPRJ, ASH1L, ATF3, MAP2K3, CRKL, MAP3K15, STK40, EFNA1, APIP, HMGCR, RPS27A, EZR, ERP29, IRAK2, JUN, XDH, IKBKG, EDN1, TIMP3, CSPG4, RAPGEF1, RANBP9, PDGFRB, TGFB1, HRAS, F2R, MAP2K1, TNIP1	ZNF675, DVL3, NRK, PDCD10, MAP2K4, ZMYND11, VRK2, LYN, EIF2AK2, UBE2N, PDGFRA, ATP6AP2, SDCBP, HSPH1, TAB2, ARL6IP5, EGFR, AIDA, HIPK3, MAP3K20, IQGAP3, RAP1B, LAMTOR3, DNAJA1, MBIP, GPS2, SYNJ2BP, IQGAP1, RGS2, PIK3CB, SHC1, HACD3, ERN1, RAPGEF2, STK3, NPTN, BMP4, TAOK3, RYK, NF1, SPRY2, PHLPP1, RIPK2, WNT5A, MAP3K9, SPRY4, SRC
GO:0042254	ribosome biogenesis	281	17	6.66	3296	0.00036	1	0.116129	1	A cellular process that results in the biosynthesis of constituent macromolecules, assembly, and arrangement of constituent parts of ribosome subunits; includes transport to the sites of protein synthesis	0.723323	-1.17085	C1D, EXOSC6, RPSA, RPL31, RPS10, NSUN5P1, RPS21, ZNF593, RPS19, RPL41, RPL21, DHX37, RPS29, RPS8, RPL10, RPS12, RPL35A, FCF1, UTP11, RPL37A, NOP53, NSUN5, RIOK2, RPS27A, DDX28, NPM3, RRNAD1, RPS23, URB2, RPS27L, RPL34, RPLP2	RPL39, MTREX, RPF1, BRIX1, DIS3, MPHOSPH10, UTP3, RPL15, MRPL1, WDR75, DDX21, EIF2A, NPM1, NOP58, SBDS, RRP15, HEATR1, EXOSC3, MTERF3, TRMT61B, RPL36A, THUMPD1, MRPS9, NUP88, YAE1D1, SDAD1, MALSU1, MAK16, UTP4, RPL17-C18orf32, FRG1, RPL17, RPL9, IMP4, NOL11, ZNHIT6, UTP15, RIOX2, ABCE1, EXOSC9, FASTKD2, LTV1, GNL3L, RRP7BP
GO:0043603	cellular amide metabolic process	697	31	16.52	1664	0.00045	0.36168	0.140625	1	The chemical reactions and pathways involving an amide, any derivative of an oxoacid in which an acidic hydroxy group has been replaced by an amino or substituted amino group, as carried out by individual cells	0.882926	-1.27832	CERS2, SLC25A32, MEX3D, GTF2H3, FTCD, SECISBP2L, PRKAA1, MTHFR, MTPN, CYR61, RPSA, EIF2B1, RPL31, DEGS1, IGFBP5, TNRC6B, SLC46A1, SERP1, RPS10, DDX6, LARP4, RPS21, NAGS, MRPL54, LNPEP, GGT7, RPS19, RPL41, SLC19A1, FOXO3, MRPS21, ST3GAL5, RPL21, DAPK3, DNAJC3, UQCC2, RPS29, RPS8, RPL10, RPS12, RPL35A, BTD, HLCS, RPL22L1, EIF1AX, PTBP1, SARS2, RPL37A, PCSK7, RPS27A, MTHFD2, STAT5B, CARNMT1, GTF2H2,…	RPL39, MRPS30, EIF3M, GSPT1, EIF3E, NFE2L2, PAIP1, AASDH, CPE, GSPT2, RPL15, HSP90AA1, MRPL3, EIF2AK2, CPA3, MRPL1, NCK1, IARS, FAM129A, EIF2A, PPP1R15B, ARG2, NPEPPS, NPM1, GCH1, IREB2, PUM2, EIF1B, EEF1E1, C12orf65, RARS, ATP6AP2, CAPRIN1, EIF3J, ALDH5A1, DARS2, EGFR, EIF3H, DDX5, HNRNPR, RMND1, MTIF3, RPL36A, ALKBH1, GARS, MCCC2, MRPS9, WARS2, TNRC6A, LAMP2, FMR1, YAE1D1, SSB, PRKRA, MALSU1, S…
GO:0006518	peptide metabolic process	609	28	14.43	2123	0.00052	0.48515	0.1475	1	The chemical reactions and pathways involving peptides, compounds of two or more amino acids where the alpha carboxyl group of one is bound to the alpha amino group of another	0.77609	-1.27832	MEX3D, GTF2H3, SECISBP2L, MTPN, RPSA, EIF2B1, RPL31, IGFBP5, TNRC6B, SERP1, RPS10, DDX6, LARP4, RPS21, MRPL54, LNPEP, GGT7, RPS19, RPL41, FOXO3, MRPS21, RPL21, DAPK3, DNAJC3, UQCC2, RPS29, RPS8, RPL10, RPS12, RPL35A, RPL22L1, EIF1AX, PTBP1, SARS2, RPL37A, PCSK7, RPS27A, CARNMT1, GTF2H2, TIA1, RPS23, RPS27L, RPL34, EIF2AK4, AGO2, EIF2S2, RPLP2, CHCHD1, TRMT10C, EIF4G3, SMAD3, MRPL44, CELF1, YTHDF1…	RPL39, MRPS30, EIF3M, GSPT1, EIF3E, NFE2L2, PAIP1, AASDH, CPE, GSPT2, RPL15, HSP90AA1, MRPL3, EIF2AK2, CPA3, MRPL1, NCK1, IARS, FAM129A, EIF2A, PPP1R15B, NPEPPS, NPM1, IREB2, PUM2, EIF1B, EEF1E1, C12orf65, RARS, ATP6AP2, CAPRIN1, EIF3J, ALDH5A1, DARS2, EGFR, EIF3H, DDX5, HNRNPR, RMND1, MTIF3, RPL36A, ALKBH1, GARS, MRPS9, WARS2, TNRC6A, LAMP2, FMR1, YAE1D1, SSB, PRKRA, MALSU1, DND1, PROS1, RGS2, E…
GO:0000461	endonucleolytic cleavage to generate mat...	2	2	0.05	7	0.00056	0.00056	0.1475	0.58	Endonucleolytic cleavage at the 3'-end of the SSU-rRNA from an originally tricistronic rRNA transcript that contained the Small Subunit (SSU) rRNA, the 5.8S rRNA, and the Large Subunit (LSU) rRNA in that order from 5' to 3' along the primary transcript, to produce the mature end of the SSU-rRNA	0.710268	0.710268	RPSA, RPS21
GO:0036135	Schwann cell migration	2	2	0.05	3297	0.00056	1	0.1475	1	The orderly movement of a Schwann cell from one site to another. A Schwann cell is a glial cell that ensheathes axons of neuron in the peripheral nervous system and is necessary for their maintainance and function	0.99079	0.99079	CERS2, TIAM1
GO:1900147	regulation of Schwann cell migration	2	2	0.05	8	0.00056	0.00056	0.1475	0.58	Any process that modulates the frequency, rate or extent of Schwann cell migration	0.99079	0.99079	CERS2, TIAM1
GO:0070987	error-free translesion synthesis	17	4	0.4	9	0.00057	0.00057	0.1475	0.58	The conversion of DNA-damage induced single-stranded gaps into large molecular weight DNA after replication by using a specialized DNA polymerase or replication complex to insert a defined nucleotide across the lesion. This process does not remove the replication-blocking lesions but does not causes an increase in the endogenous mutation level. For S. cerevisiae, RAD30 encodes DNA polymerase eta,…	0.380133	-0.180892	UBC, RPA3, RFC1, RPS27A	PCNA, RFC4
GO:0051092	positive regulation of NF-kappaB transcr...	80	8	1.9	10	0.00058	0.00058	0.1475	0.58	Any process that activates or increases the frequency, rate or extent of activity of the transcription factor NF-kappaB	0.703124	-0.830644	PSMA6, CHUK, MTPN, UBC, PIDD1, KRAS, TRIM5, NLRP3, LRRFIP1, SPHK1, TRIM32, RPS27A, IRAK2, TRADD, IKBKG, TGFB1	TERF2IP, EIF2AK2, UBE2N, NPM1, TRIM13, TAB2, GREM1, MTDH, RPS6KA5, RIPK2, NFKB1, WNT5A
GO:0010605	negative regulation of macromolecule met...	1560	56	36.97	304	0.00058	0.0531	0.1475	1	Any process that decreases the frequency, rate or extent of the chemical reactions and pathways involving macromolecules, any molecule of high relative molecular mass, the structure of which essentially comprises the multiple repetition of units derived, actually or conceptually, from molecules of low relative molecular mass	1.10152	-1.57241	LRP8, KAT6A, SKIL, KLF12, PSMA6, NPAT, H3F3A, C1D, EXOSC6, SH3RF1, CNPY2, MEX3D, SOCS7, TOB2, ZBTB18, CDYL, TSNAX, PNPT1, ARHGAP35, BIRC6, CREBZF, ANAPC7, TAF9B, WFDC3, KLF16, RPSA, AHR, PRKCE, CDK9, HMG20A, HES6, SOCS4, NDFIP2, UBC, BAHD1, CCAR1, BRCA1, GFI1, RPL31, TBX2, GON4L, RTF1, RASSF2, IGFBP5, EGR1, SMAD4, TNRC6B, PPM1F, PRKAR1B, PTPN3, RPS10, DDX6, ATOH8, RPS21, MECP2, CBX6, PARPBP, MDM4…	FAM220A, PSMD5, ZNF675, HAT1, THRB, UBE2D3, TERF2IP, RPL39, EPC1, GSPT1, RNASEH2B, RNF2, UCHL5, PSMD12, USP25, EIF3E, PDCD10, TENT2, AZIN1, CREB1, SIN3A, DIS3, PAIP1, ITM2B, DYRK1A, ADNP, ZMYND11, ZNF224, GSPT2, RPL15, ZBTB1, BAZ2A, IRF2, FMN2, LYN, TMF1, NFIL3, KDM5A, STAT1, EIF2AK2, AKIRIN2, USP14, ZNF567, PSMA1, ANAPC10, BTAF1, EED, COPS2, TMEM59, PTBP3, GLIS3, MSH2, IKZF4, NCK1, FAM129A, PPP1…
GO:0023014	signal transduction by protein phosphory...	463	23	10.97	916	0.00059	0.17683	0.1475	1	A process in which the transfer of one or more phosphate groups to a substrate transmits a signal to the phosphorylated substrate	0.90995	-1.29793	FGFR3, PSMA6, SH3RF1, CARD9, ADAM9, TIAM1, PRKAA1, CHUK, CYR61, PDE8A, PRKCE, UBC, NRAS, RASSF2, SMAD4, KRAS, TRIM5, AKAP13, MEF2D, KISS1, CDH2, PAK2, DUSP10, MADD, STK10, TGFBR1, FOXM1, CDK1, MARK3, FLCN, SEMA7A, MAGED1, S1PR2, PTPRJ, ASH1L, ATF3, MAP2K3, CRKL, MAP3K15, STK40, EFNA1, APIP, HMGCR, RPS27A, EZR, IRS1, ERP29, IRAK2, JUN, XDH, IKBKG, EDN1, TIMP3, CSPG4, RAPGEF1, CAB39, RANBP9, PDGFRB…	PSMD5, ZNF675, DVL3, NRK, PSMD12, PDCD10, MAP2K4, ZMYND11, VRK2, LYN, RASGRF1, EIF2AK2, PSMA1, RASA1, UBE2N, PSMC6, PDGFRA, ATP6AP2, SDCBP, HSPH1, TAB2, CALM2, ARL6IP5, PSMA4, EGFR, AIDA, HIPK3, MAP3K20, IQGAP3, RAP1B, LAMTOR3, MAPK8, DNAJA1, MBIP, GPS2, OXTR, FGF13, JAK1, SYNJ2BP, GRIN2D, IQGAP1, RGS2, PSMD14, PIK3CB, SHC1, MED1, HACD3, ERN1, RAPGEF2, PSMD6, STK3, NPTN, BMP4, AKAP9, MET, TAOK3, …
GO:1904380	endoplasmic reticulum mannose trimming	18	4	0.43	11	0.00072	0.00072	0.17561	0.654545		0.358489	-0.126365	UBC, EDEM1, AMFR, RPS27A	TRIM13
GO:0000165	MAPK cascade	445	22	10.55	1183	0.00083	0.24207	0.197619	1	An intracellular protein kinase cascade containing at least a MAPK, a MAPKK and a MAP3K. The cascade can also contain two additional tiers: the upstream MAP4K and the downstream MAP Kinase-activated kinase (MAPKAPK). The kinases in each tier phosphorylate and activate the kinases in the downstream tier to transmit a signal within a cell	0.90995	-1.29793	FGFR3, PSMA6, SH3RF1, CARD9, ADAM9, TIAM1, PRKAA1, CHUK, CYR61, PDE8A, PRKCE, UBC, NRAS, RASSF2, SMAD4, KRAS, TRIM5, AKAP13, MEF2D, KISS1, CDH2, DUSP10, MADD, TGFBR1, FOXM1, CDK1, MARK3, FLCN, SEMA7A, MAGED1, S1PR2, PTPRJ, ASH1L, ATF3, MAP2K3, CRKL, MAP3K15, STK40, EFNA1, APIP, HMGCR, RPS27A, EZR, IRS1, ERP29, IRAK2, JUN, XDH, IKBKG, EDN1, TIMP3, CSPG4, RAPGEF1, RANBP9, PDGFRB, TGFB1, HRAS, F2R, …	PSMD5, ZNF675, DVL3, NRK, PSMD12, PDCD10, MAP2K4, ZMYND11, VRK2, LYN, RASGRF1, EIF2AK2, PSMA1, RASA1, UBE2N, PSMC6, PDGFRA, ATP6AP2, SDCBP, HSPH1, TAB2, CALM2, ARL6IP5, PSMA4, EGFR, AIDA, HIPK3, MAP3K20, IQGAP3, RAP1B, LAMTOR3, MAPK8, DNAJA1, MBIP, GPS2, OXTR, FGF13, JAK1, SYNJ2BP, GRIN2D, IQGAP1, RGS2, PSMD14, PIK3CB, SHC1, MED1, HACD3, ERN1, RAPGEF2, PSMD6, STK3, NPTN, BMP4, AKAP9, MET, TAOK3, …
GO:0006297	nucleotide-excision repair, DNA gap fill...	19	4	0.45	12	0.0009	0.0009	0.209302	0.75	Repair of the gap in the DNA helix by DNA polymerase and DNA ligase after the portion of the strand containing the lesion has been removed by pyrimidine-dimer repair enzymes	0.381296	-0.258136	UBC, RPA3, RFC1, RPS27A	PCNA, RFC4
GO:0006296	nucleotide-excision repair, DNA incision...	33	5	0.78	13	0.00098	0.00098	0.222727	0.753846	The endonucleolytic cleavage of the damaged strand of DNA 5' to the site of damage. The incision occurs at the junction of single-stranded DNA and double-stranded DNA that is formed when the DNA duplex is unwound. The incision follows the incision formed 3' to the site of damage	0.515623	-0.402164	GTF2H3, UBC, RPA3, RFC1, RPS27A, GTF2H2	PCNA, RFC4, GTF2H1
GO:0036507	protein demannosylation	20	4	0.47	3298	0.0011	1	0.23913	1		0.410294	-0.137134	UBC, MAN1A1, EDEM1, AMFR, RPS27A	TRIM13
GO:0036508	protein alpha-1,2-demannosylation	20	4	0.47	3299	0.0011	1	0.23913	1		0.410294	-0.137134	UBC, MAN1A1, EDEM1, AMFR, RPS27A	TRIM13
GO:0033683	nucleotide-excision repair, DNA incision	35	5	0.83	3300	0.0013	1	0.276596	1	A process that results in the endonucleolytic cleavage of the damaged strand of DNA. The incision occurs at the junction of single-stranded DNA and double-stranded DNA that is formed when the DNA duplex is unwound	0.515623	-0.448909	GTF2H3, UBC, RPA3, RFC1, RPS27A, GTF2H2	PCNA, RFC4, GTF2H1, OGG1
GO:0016071	mRNA metabolic process	586	26	13.89	2078	0.00139	0.46887	0.284	1	The chemical reactions and pathways involving mRNA, messenger RNA, which is responsible for carrying the coded genetic 'message', transcribed from DNA, to sites of protein assembly at the ribosomes	0.937037	-1.36025	ZNF326, POLR3K, EXOSC6, PPP4R2, TRUB1, CDC40, GTF2H3, PNPT1, PRPF38B, RPSA, CDK9, CCAR1, RPL31, RNPC3, TNRC6B, RPS10, DDX6, RPS21, AQR, SUPT6H, RPS19, ZHX2, RPL41, SNRPB2, LSM5, UBL5, EDC3, RPL21, ARL6IP4, RPS29, RPS8, RPL10, RPS12, RPL35A, HNRNPA1L2, SUGP2, HIF1A, THRAP3, PTBP1, RPL37A, GEMIN8, SNRPB, RPS27A, CMTR1, GTF2H2, TIA1, RPS23, RPL34, CACTIN, DHX8, WDR77, AGO2, RPLP2, TGS1, RBM5, CELF1,…	SLU7, RPL39, MTREX, GSPT1, SLTM, RBM39, RBMXL1, EIF3E, BCAS2, DHX15, TENT2, DIS3, RBM17, PAIP1, RBM7, DYRK1A, GSPT2, RPL15, ZBTB1, SYF2, MBNL1, PTBP3, PAPOLA, DHX40, TSEN15, GTF2F2, RBM25, PPWD1, PCF11, STRAP, RAVER2, UPF2, PPIL3, DHX32, MNAT1, PLRG1, GTF2H1, TTC37, HIPK3, EXOSC3, CCNH, DDX5, RSRC1, LSM1, HNRNPR, LGALS3, PPP2R2A, RPL36A, ZMAT2, ZCCHC8, FMR1, ZC3HAV1, SRPK1, SSB, AC091959.3, CDK11…
GO:0034470	ncRNA processing	346	18	8.2	3212	0.00141	0.92684	0.284	1	Any process that results in the conversion of one or more primary non-coding RNA (ncRNA) transcripts into one or more mature ncRNA molecules	0.803868	-1.2031	C1D, EXOSC6, OSGEP, TRUB1, RPSA, POP1, RPL31, RPS10, NSUN5P1, RPS21, INTS2, RPS19, LAGE3, RPL41, RPL21, DHX37, RPS29, RPS8, RPL10, RPS12, RPL35A, FCF1, UTP11, RPL37A, NSUN5, TRMT10A, RIOK2, RPS27A, NPM3, RRNAD1, CTU1, RPS23, RPL34, GTPBP3, AGO2, RPLP2, TRMT10C, SMAD3, NSUN6, TSEN54	RPL39, MTREX, RPF1, INTS8, DIS3, MPHOSPH10, INTS7, INTS6, UTP3, RPL15, MRPL1, WDR75, DDX21, TSEN15, NOP58, PUS7L, ALKBH8, SBDS, RRP15, HEATR1, LCMT2, RTRAF, EXOSC3, TRMT11, TRMT61B, RPL36A, THUMPD1, ALKBH1, MRPS9, SSB, PRKRA, MAK16, INTS12, UTP4, KIAA0391, RPL17-C18orf32, OSGEPL1, FRG1, RPL17, RPL9, IMP4, SMAD2, NOL11, MTO1, MTFMT, UTP15, EXOSC9, LTV1, PUS3, SMAD1, PUS7, RRP7BP
GO:0016032	viral process	682	29	16.16	947	0.00142	0.19114	0.284	1	A multi-organism process in which a virus is a participant. The other participant is the host. Includes infection of a host cell, replication of the viral genome, and assembly of progeny virus particles. In some cases the viral genetic material may integrate into the host genome and only subsequently, under particular circumstances, 'complete' its life cycle	0.819009	-1.31491	POLR3K, CARD9, CREBZF, CHUK, RPSA, TAF4, CDK9, IFNGR2, UBC, CAMLG, GFI1, RPL31, CCNK, BIN1, TRIM5, RPS10, DDX6, POLR3G, RPS21, SUPT6H, RPS19, PAK2, LDLR, RPL41, TOP2A, KRT7, TAP2, RPL21, DNAJC3, NLRP3, RPS29, RPS8, RPL10, SAMHD1, RPS12, RPL35A, IPO7, RBL1, TFAP4, SCRIB, NOTCH1, TAP1, TMEM250, PTBP1, RPL37A, MAVS, P4HB, TRIM32, SIVA1, RPS27A, CHMP1A, JUN, RPS23, RPL34, CHMP7, POM121C, SEPT6, CGAS,…	ITGB1, RPL39, XPR1, TNPO1, CREB1, SIN3A, TAF5, PIK3R1, DYRK1A, ZMYND11, GPAM, GTF2B, RPL15, BUB1, VRK2, LYN, STAT1, EIF2AK2, VPS37A, BNIP3L, DDX21, VTA1, DYNC1LI1, SNX3, SUMO1, NPM1, NUP35, TRIM13, NUPL2, PUM2, NUP54, PDGFRA, GTF2F2, AC068234.1, DHX36, WWP1, KPNA3, CHMP2B, OAS3, FAM111A, PSMA4, UBE3A, IVNS1ABP, RTRAF, NUP37, ATG5, MSH6, DDX5, VAPA, NUP205, TPT1, GTF2E1, RPL36A, RAB1A, LMBRD1, SET…
GO:0044764	multi-organism cellular process	684	29	16.21	999	0.00148	0.19507	0.290196	1	Any process that is carried out at the cellular level which involves another organism of the same or different species	0.819009	-1.31491	POLR3K, CARD9, CREBZF, CHUK, RPSA, TAF4, CDK9, IFNGR2, UBC, CAMLG, GFI1, RPL31, SLC22A5, CCNK, BIN1, TRIM5, RPS10, DDX6, POLR3G, RPS21, SUPT6H, RPS19, PAK2, LDLR, RPL41, TOP2A, KRT7, TAP2, RPL21, DNAJC3, NLRP3, RPS29, RPS8, RPL10, SAMHD1, RPS12, RPL35A, IPO7, RBL1, TFAP4, SCRIB, NOTCH1, TAP1, TMEM250, PTBP1, RPL37A, MAVS, P4HB, TRIM32, SIVA1, RPS27A, CHMP1A, JUN, RPS23, RPL34, CHMP7, POM121C, SEP…	ITGB1, RPL39, XPR1, TNPO1, CREB1, SIN3A, TAF5, PIK3R1, DYRK1A, ZMYND11, GPAM, GTF2B, RPL15, BUB1, VRK2, LYN, STAT1, EIF2AK2, VPS37A, BNIP3L, DDX21, VTA1, DYNC1LI1, SNX3, SUMO1, NPM1, NUP35, TRIM13, NUPL2, PUM2, NUP54, PDGFRA, GTF2F2, AC068234.1, DHX36, WWP1, KPNA3, CHMP2B, OAS3, FAM111A, PSMA4, UBE3A, IVNS1ABP, RTRAF, NUP37, ATG5, MSH6, DDX5, VAPA, NUP205, TPT1, GTF2E1, RPL36A, RAB1A, LMBRD1, SET…
GO:0009892	negative regulation of metabolic process	1677	57	39.74	551	0.00198	0.10021	0.380769	1	Any process that stops, prevents, or reduces the frequency, rate or extent of the chemical reactions and pathways within a cell or an organism	1.10152	-1.58045	LRP8, KAT6A, SKIL, KLF12, PSMA6, NPAT, H3F3A, C1D, EXOSC6, SH3RF1, CNPY2, MEX3D, SOCS7, TOB2, ZBTB18, CDYL, SH3RF2, TSNAX, PNPT1, ARHGAP35, BIRC6, CREBZF, ANAPC7, TAF9B, WFDC3, PRKAA1, KLF16, ATXN7, RPSA, AHR, PRKCE, CDK9, HMG20A, HES6, SOCS4, NDFIP2, UBC, BAHD1, CCAR1, BRCA1, GFI1, RPL31, TBX2, GON4L, RTF1, RASSF2, IGFBP5, EGR1, SMAD4, TNRC6B, PPM1F, PRKAR1B, PTPN3, KNL1, RPS10, DDX6, ATOH8, RPS…	FAM220A, PSMD5, ZNF675, HAT1, THRB, UBE2D3, TERF2IP, RPL39, ARRDC3, EPC1, GSPT1, RNASEH2B, RNF2, UCHL5, PSMD12, USP25, EIF3E, PDCD10, TENT2, AZIN1, CREB1, SIN3A, DIS3, MPHOSPH10, PAIP1, ITM2B, DYRK1A, ADNP, ZMYND11, ZNF224, GSPT2, RPL15, ZBTB1, BAZ2A, IRF2, FMN2, LYN, TMF1, NFIL3, KDM5A, STAT1, EIF2AK2, AKIRIN2, USP14, ZNF567, PSMA1, ANAPC10, BTAF1, EED, COPS2, TMEM59, PTBP3, GLIS3, MSH2, IKZF4, …
GO:0044403	symbiosis, encompassing mutualism throug...	699	29	16.57	1112	0.00206	0.22566	0.388679	1	An interaction between two organisms living together in more or less intimate association. The term host is usually used for the larger (macro) of the two members of a symbiosis. The smaller (micro) member is called the symbiont organism. Microscopic symbionts are often referred to as endosymbionts. The various forms of symbiosis include parasitism, in which the association is disadvantageous or …	0.819009	-1.31491	POLR3K, CARD9, CREBZF, CHUK, RPSA, TAF4, CDK9, IFNGR2, UBC, CAMLG, GFI1, RPL31, SLC22A5, CCNK, BIN1, TRIM5, RPS10, DDX6, POLR3G, RPS21, SUPT6H, CBL, RPS19, PAK2, LDLR, RPL41, TOP2A, KRT7, TAP2, RPL21, DNAJC3, NLRP3, RPS29, RPS8, RPL10, SAMHD1, RPS12, RPL35A, IPO7, RBL1, TFAP4, SCRIB, NOTCH1, TAP1, TMEM250, PTBP1, RPL37A, MAVS, P4HB, TRIM32, SIVA1, RPS27A, CHMP1A, JUN, RPS23, RPL34, CHMP7, POM121C…	ITGB1, RPL39, XPR1, TNPO1, CREB1, SIN3A, TAF5, PIK3R1, DYRK1A, ZMYND11, GPAM, GTF2B, RPL15, BUB1, VRK2, LYN, STAT1, EIF2AK2, VPS37A, BNIP3L, DDX21, VTA1, DYNC1LI1, SNX3, SUMO1, NPM1, NUP35, TRIM13, NUPL2, PUM2, NUP54, PDGFRA, GTF2F2, AC068234.1, DHX36, WWP1, KPNA3, CHMP2B, OAS3, FAM111A, PSMA4, UBE3A, IVNS1ABP, RTRAF, TCP1, NUP37, ATG5, MSH6, DDX5, VAPA, NUP205, TPT1, GTF2E1, RPL36A, RAB1A, LMBRD…
GO:0044419	interspecies interaction between organis...	701	29	16.61	1120	0.00215	0.2299	0.398148	1	Any process in which an organism has an effect on an organism of a different species	0.819009	-1.31491	POLR3K, CARD9, CREBZF, CHUK, RPSA, TAF4, CDK9, IFNGR2, UBC, CAMLG, GFI1, RPL31, SLC22A5, CCNK, BIN1, TRIM5, RPS10, DDX6, POLR3G, RPS21, MECP2, SUPT6H, CBL, RPS19, PAK2, LDLR, RPL41, TOP2A, KRT7, TAP2, RPL21, DNAJC3, NLRP3, RPS29, RPS8, RPL10, SAMHD1, RPS12, RPL35A, IPO7, RBL1, TFAP4, SCRIB, NOTCH1, TAP1, TMEM250, PTBP1, RPL37A, MAVS, P4HB, TRIM32, SIVA1, RPS27A, CHMP1A, JUN, RPS23, RPL34, CHMP7, …	ITGB1, RPL39, XPR1, TNPO1, CREB1, SIN3A, TAF5, PIK3R1, DYRK1A, ZMYND11, GPAM, GTF2B, RPL15, BUB1, VRK2, LYN, STAT1, EIF2AK2, VPS37A, BNIP3L, DDX21, VTA1, DYNC1LI1, SNX3, SUMO1, NPM1, NUP35, TRIM13, NUPL2, PUM2, NUP54, PDGFRA, GTF2F2, AC068234.1, DHX36, WWP1, KPNA3, CHMP2B, OAS3, FAM111A, PSMA4, UBE3A, IVNS1ABP, RTRAF, TCP1, NUP37, ATG5, MSH6, DDX5, VAPA, NUP205, TPT1, GTF2E1, RPL36A, RAB1A, LMBRD…
GO:0070423	nucleotide-binding oligomerization domai...	24	4	0.57	14	0.00224	0.00224	0.407273	1	Any series of molecular signals generated as a consequence of binding to a nucleotide-binding oligomerization domain containing (NOD) protein	0.505292	-0.338666	CHUK, UBC, XIAP, RPS27A, CYLD, IRAK2, ERBIN, IKBKG	UBE2N, TAB2, RIPK2
GO:2001236	regulation of extrinsic apoptotic signal...	100	8	2.37	15	0.0025	0.0025	0.438333	1	Any process that modulates the frequency, rate or extent of extrinsic apoptotic signaling pathway	0.72358	-0.61021	SKIL, SH3RF1, BIRC6, BRCA1, PIDD1, PAK2, MADD, TGFBR1, DAPK3, LMNA, CTTN, ATF3, HTT, CYLD, TRADD, TIMP3, ITM2C	ZMYND11, LGALS3, EYA4, PHIP, YAP1, RPS6KB1, STK3, STRADB, BMP4, NF1, DEDD2, SRC
GO:0002756	MyD88-independent toll-like receptor sig...	25	4	0.59	16	0.00262	0.00262	0.438333	1	Any series of molecular signals generated as a consequence of binding to a toll-like receptor not relying on the MyD88 adaptor molecule. Toll-like receptors directly bind pattern motifs from a variety of microbial sources to initiate innate immune response	0.498504	-0.450417	CHUK, PRKCE, UBC, RPS27A, IRAK2, IKBKG	UBE2D3, LY96, TBK1
GO:0035872	nucleotide-binding domain, leucine rich ...	25	4	0.59	3301	0.00262	1	0.438333	1	A series of molecular signals generated as a consequence of a nucleotide-binding domain, leucine rich repeat containing receptor (NLR) binding to one of its physiological ligands. NLRs are cytoplasmic receptors defined by their tripartite domain architecture that contains: a variable C-terminus, a middle nucleotide-binding domain, and a LRR domain that is variable in the repeats composition and n…	0.505292	-0.338666	CHUK, UBC, XIAP, RPS27A, CYLD, IRAK2, ERBIN, IKBKG	UBE2N, TAB2, RIPK2
GO:0038128	ERBB2 signaling pathway	25	4	0.59	17	0.00262	0.00262	0.438333	1	A series of molecular signals initiated by binding of a ligand to a member of the ERBB family of receptors on the surface of a cell, where the signal is transmitted by ERBB2. The pathway ends with regulation of a downstream cellular process, e.g. transcription. ERBB2 receptors are themselves unable to bind to ligands, but act as a signal-amplifying tyrosine kinase within a heterodimeric pair	0.442881	-0.643968	UBC, NRAS, KRAS, RPS27A, ERBIN, HRAS	PTPN12, PIK3R1, HSP90AA1, CPNE3, EGFR, SHC1, CUL5, SRC
GO:0072594	establishment of protein localization to...	487	22	11.54	2624	0.00263	0.65914	0.438333	1	The directed movement of a protein to a specific location on or in an organelle. Encompasses establishment of localization in the membrane or lumen of a membrane-bounded organelle	0.734117	-1.22963	IPO4, RPSA, NRAS, DNAJC19, RPL31, SMAD4, RAB8B, RPS10, KPNA6, TNPO2, RPS21, TOMM5, GSK3B, SUFU, TOMM40L, THRA, AP3D1, RPS19, RPL41, TGFBR1, UBL5, CDK1, WRAP53, DNLZ, RPL21, NLRP3, NFKBIE, RPS29, RPS8, RPL10, LEPROT, RPS12, RPL35A, IPO7, TOMM7, LMNA, IFT122, SCRIB, CCDC22, VTI1A, RPL37A, SPHK1, TSPO, PPP3R1, TSPAN17, MAVS, NAGPA, RPS27A, MAPT, CYLD, IPO11, AKR1C3, JUN, RPS23, RPL34, BRCA2, POM121C…	UBE2D3, SRP19, RPL39, TNPO1, NOV, PIK3R1, RPL15, YWHAZ, HSP90AA1, CSNK2A2, VPS36, BNIP3L, WDR75, TOMM20, PEX3, NCOA4, NPEPPS, NUP35, AP3B1, AP3M1, NUP54, RAB11A, HNMT, HSPH1, CALM2, KPNA3, YWHAH, ZFAND6, EGFR, TCP1, MFF, SH3GLB1, RPL36A, SRP72, MAPK8, DNAJA1, GREM1, RAB6A, NUP88, LAMP2, SRP54, SRP14, HSPA4, ZFYVE16, PEX1, RAB10, MED1, SPCS2, RPL17-C18orf32, RANBP6, RPL17, CEP57, RPL9, PEX2, BMP4,…
GO:0002429	immune response-activating cell surface ...	173	11	4.1	820	0.00268	0.15463	0.439344	1	A series of molecular signals initiated by the binding of an extracellular ligand to a receptor on the surface of a cell capable of activating or perpetuating an immune response	0.791766	-1.13706	PSMA6, CARD9, CHUK, DOCK1, ARPC1B, PRKCE, UBC, NRAS, KRAS, VAV2, PAK2, PLCL2, PTPRJ, MUC1, ACTR2, RPS27A, EZR, CYLD, IKBKG, RAPGEF1, HRAS	PSMD5, PSMD12, ARPC5, PIK3R1, PRKACB, HSP90AA1, LYN, LPXN, PSMA1, UBE2N, NCK1, PSMC6, PRNP, TAB2, PSMA4, BTN3A1, LGALS3, ACTR3, RPS6KA5, PSMD14, PIK3CB, RC3H1, MYO10, PSMD6, CYFIP1, NCKAP1, RIPK2, NFKB1, ELMO2, PSMD7, ABI1, SRC
GO:0006294	nucleotide-excision repair, preincision ...	26	4	0.62	18	0.00304	0.00304	0.484127	1	The aggregation, arrangement and bonding together of proteins on DNA to form the multiprotein complex involved in damage recognition, DNA helix unwinding, and endonucleolytic cleavage at the site of DNA damage. This assembly occurs before the phosphodiester backbone of the damaged strand is cleaved 3' and 5' of the site of DNA damage	0.484254	-0.50394	GTF2H3, UBC, RPA3, RPS27A, GTF2H2	CETN2, MNAT1, GTF2H1, CCNH
GO:1901566	organonitrogen compound biosynthetic pro...	954	36	22.61	2007	0.00305	0.45096	0.484127	1	The chemical reactions and pathways resulting in the formation of organonitrogen compound	0.886106	-1.43723	CERS2, GPC2, MEX3D, GTF2H3, ADSS, SECISBP2L, PRKAA1, MTPN, CYR61, RPSA, PSPH, CSGALNACT2, MC1R, PXYLP1, EIF2B1, MRAP, ST3GAL2, RPL31, DEGS1, RFK, IGFBP5, TNRC6B, SERP1, UMPS, RPS10, DDX6, LARP4, RPS21, NAGS, MRPL54, PDXK, GGT7, NME3, RPS19, GPT2, RPL41, FOXO3, DCK, MRPS21, ST3GAL5, RPL21, DAPK3, DNAJC3, UQCC2, RPS29, RPS8, FLCN, RPL10, RPS12, RPL35A, RPL22L1, EIF1AX, CPOX, PTBP1, SARS2, RPL37A, C…	EXTL2, PPCS, ATP5F1EP2, RPL39, MRPS30, EIF3M, GSPT1, LINC02210-CRHR1, EIF3E, NFE2L2, AZIN1, PAIP1, AASDH, PRKD3, ADNP, GSPT2, RPL15, MRPL3, EIF2AK2, MRPL1, LUM, CSNK2A2, NCK1, IARS, FAM129A, EIF2A, PPP1R15B, ARG2, NPM1, GCH1, IREB2, PUM2, EIF1B, NAMPT, EEF1E1, C12orf65, RARS, ESD, CAPRIN1, EIF3J, CALM2, HS2ST1, LCMT2, DARS2, SLC35B3, EGFR, EIF3H, ATP5F1C, MOCS2, DDX5, VAPA, HNRNPR, RMND1, MTIF3, …
GO:0043116	negative regulation of vascular permeabi...	4	2	0.09	19	0.00325	0.00325	0.5	1	Any process that reduces the extent to which blood vessels can be pervaded by fluid	0.401895	0.401895	ARHGAP35, PTPRJ
GO:1903975	regulation of glial cell migration	4	2	0.09	3302	0.00325	1	0.5	1		0.451558	0.451558	CERS2, TIAM1
GO:0002220	innate immune response activating cell s...	83	7	1.97	3303	0.00343	1	0.511765	1	Any series of molecular signals leading to activation of the innate immune response generated as a consequence of binding to a cell surface receptor	0.698786	-1.00421	PSMA6, CARD9, CHUK, UBC, NRAS, KRAS, PAK2, MUC1, RPS27A, IKBKG, HRAS	PSMD5, PSMD12, PRKACB, LYN, PSMA1, UBE2N, PSMC6, TAB2, PSMA4, RPS6KA5, PSMD14, PSMD6, NFKB1, PSMD7, SRC
GO:0002223	stimulatory C-type lectin receptor signa...	83	7	1.97	20	0.00343	0.00343	0.511765	1	Any series of molecular signals generated as a consequence of binding to a C-type lectin receptor capable of cellular activation	0.698786	-1.00421	PSMA6, CARD9, CHUK, UBC, NRAS, KRAS, PAK2, MUC1, RPS27A, IKBKG, HRAS	PSMD5, PSMD12, PRKACB, LYN, PSMA1, UBE2N, PSMC6, TAB2, PSMA4, RPS6KA5, PSMD14, PSMD6, NFKB1, PSMD7, SRC
GO:0030522	intracellular receptor signaling pathway	179	11	4.24	426	0.00348	0.07011	0.511765	1	Any series of molecular signals initiated by a ligand binding to an receptor located within a cell	0.856632	-0.900828	RNF6, SKP2, EGLN2, RXRB, CHUK, AHR, NCOA3, UBC, BRCA1, THRA, NR1D2, XIAP, THRAP3, VDR, MAVS, RPS27A, CYLD, AKR1C3, IRAK2, ERBIN, IKBKG, TRIM68	THRB, UBE2N, NCOA4, MED4, PUM2, NR2C1, PIAS2, TAB2, YWHAH, UBE3A, UBA5, NKX3-1, DDX5, KDM5D, PLPP1, DNAJA1, NR2F1, ISL1, KDM3A, MED12, NOTCH2, DDX17, RNF14, MED1, MED17, CNOT2, CNOT1, PUM1, PDK3, RIPK2, NCOA1, RARB, SRC
GO:0006301	postreplication repair	44	5	1.04	1928	0.00365	0.43241	0.528986	1	The conversion of DNA-damage induced single-stranded gaps into large molecular weight DNA after replication. Includes pathways that remove replication-blocking lesions in conjunction with DNA replication	0.49113	-0.867675	UBC, RPA3, BRCA1, RFC1, RPS27A	POLE2, ZBTB1, PCNA, UBE2N, MSH2, RFC4, UBE2A, DTL, PRIMPOL, HLTF
GO:0002758	innate immune response-activating signal...	155	10	3.67	2581	0.00373	0.64097	0.532857	1	The cascade of processes by which a signal interacts with a receptor, causing a change in the level or activity of a second messenger or other downstream target, and ultimately leading to activation or perpetuation of an innate immune response	0.77561	-1.13085	PSMA6, CARD9, CHUK, PRKCE, UBC, NRAS, GFI1, KRAS, TRIM5, LGR4, PAK2, XIAP, MUC1, MAVS, RPS27A, CYLD, IRAK2, ERBIN, CACTIN, IKBKG, HRAS, TNIP1	PSMD5, UBE2D3, PSMD12, PRKACB, LYN, LY96, PSMA1, UBE2N, PUM2, PSMC6, TAB2, PSMA4, RPS6KA5, PSMD14, PSMD6, PUM1, RIPK2, NFKB1, TBK1, PSMD7, SRC
GO:0045089	positive regulation of innate immune res...	181	11	4.29	2116	0.00379	0.4803	0.533803	1	Any process that activates or increases the frequency, rate or extent of the innate immune response, the organism's first line of defense against infection	0.779517	-1.16294	PSMA6, CARD9, CHUK, PRKCE, UBC, NRAS, GFI1, KRAS, TRIM5, POLR3G, LGR4, RPS19, PAK2, XIAP, MUC1, MAVS, RPS27A, CYLD, STAT5B, IRAK2, ERBIN, CACTIN, CGAS, IKBKG, HRAS, TNIP1	PSMD5, UBE2D3, PSMD12, SIN3A, PRKACB, LYN, LY96, PSMA1, UBE2N, PUM2, PSMC6, TAB2, PSMA4, CADM1, RPS6KA5, PSMD14, MED1, PSMD6, PUM1, RIPK2, NFKB1, WNT5A, TBK1, PSMD7, SRC
GO:0006517	protein deglycosylation	28	4	0.66	3304	0.00401	1	0.544595	1	The removal of sugar residues from a glycosylated protein	0.428771	-0.411423	UBC, MAN1A1, EDEM1, AMFR, RPS27A	MAN2A1, TRIM13, NGLY1, MAN2A2
GO:0090342	regulation of cell aging	28	4	0.66	21	0.00401	0.00401	0.544595	1	Any process that modulates the rate, frequency, or extent of cell aging. Cell aging is the progression of the cell from its inception to the end of its lifespan	0.382011	-0.377212	PNPT1, KRAS, FOXM1, LMNA	EEF1E1, CDK6, NUAK1, HMGA2
GO:0045088	regulation of innate immune response	209	12	4.95	1773	0.00403	0.39163	0.544595	1	Any process that modulates the frequency, rate or extent of the innate immune response, the organism's first line of defense against infection	0.788653	-1.17857	PSMA6, CARD9, CHUK, PRKCE, IFNGR2, UBC, NRAS, GFI1, KRAS, TRIM5, POLR3G, RNF135, LGR4, RPS19, PAK2, DUSP10, XIAP, SAMHD1, MUC1, MAVS, RPS27A, CYLD, STAT5B, IRAK2, ERBIN, CACTIN, CGAS, IKBKG, HRAS, TNIP1	PSMD5, UBE2D3, PSMD12, SIN3A, PRKACB, LYN, LY96, STAT1, PSMA1, UBE2N, SUMO1, PUM2, PSMC6, TAB2, PSMA4, CADM1, JAK1, RPS6KA5, PSMD14, MED1, PSMD6, PUM1, ERAP1, RIPK2, NFKB1, WNT5A, TBK1, PSMD7, SRC
GO:0006396	RNA processing	768	30	18.2	1887	0.00423	0.42288	0.55974	1	Any process involved in the conversion of one or more primary RNA transcripts into one or more mature RNA molecules	0.949854	-1.33713	ZNF326, C1D, EXOSC6, OSGEP, PPP4R2, TRUB1, CDC40, GTF2H3, PNPT1, PRPF38B, RPSA, CDK9, CCAR1, POP1, RPL31, RNPC3, RPS10, NSUN5P1, RPS21, INTS2, AQR, SUPT6H, RPS19, LAGE3, RPL41, SNRPB2, LSM5, UBL5, RPL21, DHX37, ARL6IP4, RPS29, RPS8, RPL10, RBMS1, RPS12, RPL35A, HNRNPA1L2, FCF1, SUGP2, DDX19A, UTP11, THRAP3, PTBP1, RPL37A, GEMIN8, NSUN5, TRMT10A, RIOK2, SNRPB, RPS27A, NPM3, CMTR1, RRNAD1, GTF2H2, …	SLU7, RPL39, MTREX, SLTM, RBM39, RBMXL1, BCAS2, DHX15, TENT2, RPF1, INTS8, DIS3, RBM17, MPHOSPH10, PIK3R1, RBM7, INTS7, INTS6, DYRK1A, UTP3, RPL15, SYF2, MBNL1, MRPL1, PTBP3, WDR75, DDX21, PAPOLA, DHX40, TSEN15, NOP58, PUS7L, ALKBH8, SBDS, GTF2F2, DHX36, RBM25, PPWD1, PCF11, RRP15, HEATR1, STRAP, RAVER2, LCMT2, PPIL3, DHX32, MNAT1, PLRG1, IVNS1ABP, EGFR, RTRAF, GTF2H1, RBMS2, EXOSC3, CCNH, DDX5, …
GO:0015833	peptide transport	1329	46	31.5	1016	0.00429	0.20542	0.55974	1	The directed movement of peptides, compounds of two or more amino acids where the alpha carboxyl group of one is bound to the alpha amino group of another, into, out of or within a cell, or between cells, by means of some agent such as a transporter or pore	0.895715	-1.4711	IPO4, SNAP29, CDC40, ADAM9, TSNAX, TSNARE1, TIAM1, SYTL3, CHUK, LIN7C, RPSA, PRKCE, SPIRE2, NDFIP2, ARFIP1, DNAJC19, RPL31, TOM1, MYO5A, RAB26, STXBP3, SMAD4, RAB8B, SERP1, SNX8, RPS10, STX16, STX6, KPNA6, TNPO2, RPS21, NEURL1B, ZNF593, TOMM5, SNX19, SAR1B, TBC1D14, TBC1D9, KISS1, MIDN, BET1, GSK3B, LGR4, SUFU, DGKD, TOMM40L, ENTR1, THRA, STX18, AFTPH, SUPT6H, RAB12, VPS26A, TMED7, AP3D1, RPS19, …	EXOC5, SLU7, PPT1, UBE2D3, SRP19, RPL39, LYPLA1, CD58, LINC02210-CRHR1, TNPO1, SEC31A, NOV, RPGR, SCAMP1, SNX13, COG5, RABGAP1L, PIK3R1, TMEM167A, GPAM, RPL15, YWHAZ, HSP90AA1, FMN2, LYN, DNM1L, SNX2, VPS37A, KDELR3, CSNK2A2, SNX14, VPS36, BNIP3L, IFT74, WDR75, TOMM20, PEX3, VTA1, NCOA4, SFT2D1, SNX3, NPEPPS, NPM1, NUP35, SEC61A2, AP3B1, NUPL2, AP3M1, SEC24B, NUP54, WASHC4, RAB11A, PRNP, MON2, TV…
GO:0080134	regulation of response to stress	769	30	18.22	3165	0.00431	0.90165	0.55974	1	Any process that modulates the frequency, rate or extent of a response to stress. Response to stress is a change in state or activity of a cell or an organism (in terms of movement, secretion, enzyme production, gene expression, etc.) as a result of a disturbance in organismal or cellular homeostasis, usually, but not necessarily, exogenous (e.g. temperature, humidity, ionizing radiation)	0.995109	-1.43784	SKIL, CERS2, PSMA6, VPS13C, PPP4R2, SOD2, SH3RF1, CARD9, PNPT1, TIAM1, CDK19, TAF9B, CHUK, PDE8A, PRKCE, CDK9, FIGNL1, IFNGR2, UBC, RPA3, BRCA1, NRAS, GFI1, RASSF2, KRAS, TRIM5, POLR3G, RNF135, PARPBP, BABAM1, VAV2, GSK3B, LGR4, ARMT1, SBNO2, RPS19, PAK2, CHORDC1, LDLR, DUSP10, EDEM1, NR1D2, FOXO3, XIAP, FOXM1, SYT11, DNAJC3, CASK, NLRP3, ERLEC1, SEMA7A, SAMHD1, OPA1, ASH1L, FAM168A, HIF1A, MUC1,…	PSMD5, ZNF675, UBE2D3, TERF2IP, DVL3, RNASEH2B, NRK, PSMD12, USP25, NOV, NFE2L2, PDCD10, SIN3A, HPSE, PIK3R1, MAP2K4, DYRK1A, ZMYND11, PCNA, PRKACB, HSP90AA1, LYN, LY96, SPP1, PTGES3, STAT1, EIF2AK2, USP14, PSMA1, UBE2N, NCK1, PPP1R15B, SUMO1, NPM1, NUP35, TAF9, NUPL2, GPRC5B, GCH1, PUM2, PSMC6, NUP54, EEF1E1, PDGFRA, TBC1D23, OXR1, SDCBP, HSPH1, TAB2, ARL6IP5, ABRAXAS1, PSMA4, CADM1, EGFR, AIDA,…
GO:0032479	regulation of type I interferon producti...	87	7	2.06	22	0.00446	0.00446	0.565823	1	Any process that modulates the frequency, rate, or extent of interferon type I production. Type I interferons include the interferon-alpha, beta, delta, episilon, zeta, kappa, tau, and omega gene families	0.660256	-0.45037	POLR3K, CHUK, DTX4, UBC, POLR3G, RNF135, LRRFIP1, MAVS, TRIM32, RPS27A, CYLD, CACTIN, CGAS	DHX36, ZC3HAV1, RIPK2, NFKB1, TRIM21, TBK1
GO:0002218	activation of innate immune response	159	10	3.77	2668	0.00447	0.67298	0.565823	1	Any process that initiates an innate immune response. Innate immune responses are defense responses mediated by germline encoded components that directly recognize components of potential pathogens. Examples of this process include activation of the hypersensitive response of Arabidopsis thaliana and activation of any NOD or TLR signaling pathway in vertebrate species	0.77561	-1.16294	PSMA6, CARD9, CHUK, PRKCE, UBC, NRAS, GFI1, KRAS, TRIM5, LGR4, PAK2, XIAP, MUC1, MAVS, RPS27A, CYLD, IRAK2, ERBIN, CACTIN, CGAS, IKBKG, HRAS, TNIP1	PSMD5, UBE2D3, PSMD12, SIN3A, PRKACB, LYN, LY96, PSMA1, UBE2N, PUM2, PSMC6, TAB2, PSMA4, RPS6KA5, PSMD14, PSMD6, PUM1, RIPK2, NFKB1, TBK1, PSMD7, SRC
GO:1901564	organonitrogen compound metabolic proces...	1445	49	34.25	1406	0.00471	0.29527	0.58642	1	The chemical reactions and pathways involving organonitrogen compound	1.06725	-1.51948	SPNS2, CERS2, PSMA6, GPC2, EGLN2, SLC25A32, MEX3D, GTF2H3, ADSS, FTCD, MBOAT2, THTPA, SECISBP2L, UQCRHL, PRKAA1, MTHFR, MTPN, CYR61, ARSI, PDE8A, RPSA, NDUFA11, PSPH, FIGNL1, CSGALNACT2, MC1R, PXYLP1, EIF2B1, MRAP, ST3GAL2, RPL31, DEGS1, RFK, SLC22A5, IGFBP5, TNRC6B, NDUFA2, DCTPP1, BPNT1, SLC46A1, SERP1, UMPS, RPS10, DDX6, NDUFB2, LARP4, RPS21, MECP2, NAGS, OSBPL8, MRPL54, PFKFB4, PDXK, LNPEP, G…	PSMD5, EXTL2, PPCS, PPT1, ATP5F1EP2, RPL39, MRPS30, EIF3M, GSPT1, MMADHC, LINC02210-CRHR1, PSMD12, EIF3E, NFE2L2, AZIN1, PAIP1, HPSE, AASDH, RHOQ, PRKD3, CPE, ADNP, GSPT2, RPL15, SLC22A4, UQCRB, HSP90AA1, MRPL3, EIF2AK2, DNM1L, HMMR, PSMA1, CPA3, MRPL1, LUM, CSNK2A2, MSH2, ERO1A, NCK1, IARS, FAM129A, EIF2A, PPP1R15B, ARG2, NPEPPS, NPM1, GCH1, IREB2, PUM2, PSMC6, EIF1B, NAMPT, EEF1E1, C12orf65, ND…
GO:0032606	type I interferon production	88	7	2.09	3305	0.00475	1	0.58642	1	The appearance of type I interferon due to biosynthesis or secretion following a cellular stimulus, resulting in an increase in its intracellular or extracellular levels. Type I interferons include the interferon-alpha, beta, delta, episilon, zeta, kappa, tau, and omega gene families	0.660256	-0.450827	POLR3K, CHUK, DTX4, UBC, POLR3G, RNF135, LRRFIP1, MAVS, TRIM32, RPS27A, CYLD, CACTIN, CGAS	DHX36, ZC3HAV1, RIPK2, NFKB1, TRIM21, TBK1
GO:0002757	immune response-activating signal transd...	242	13	5.74	1644	0.00492	0.35429	0.596386	1	The cascade of processes by which a signal interacts with a receptor, causing a change in the level or activity of a second messenger or other downstream target, and ultimately leading to activation or perpetuation of an immune response	0.80236	-1.19664	PSMA6, CARD9, CHUK, DOCK1, ARPC1B, PRKCE, UBC, NRAS, GFI1, KRAS, TRIM5, VAV2, LGR4, PAK2, XIAP, PLCL2, PTPRJ, MUC1, ACTR2, MAVS, RPS27A, EZR, CYLD, IRAK2, ERBIN, CACTIN, IKBKG, RAPGEF1, HRAS, TNIP1	PSMD5, UBE2D3, PSMD12, ARPC5, PIK3R1, PRKACB, HSP90AA1, LYN, LY96, LPXN, PSMA1, UBE2N, NCK1, PUM2, PSMC6, PRNP, TAB2, PSMA4, BTN3A1, LGALS3, ACTR3, SKAP2, RPS6KA5, PSMD14, PIK3CB, RC3H1, MYO10, PSMD6, PUM1, CYFIP1, NCKAP1, RIPK2, NFKB1, ELMO2, TBK1, PSMD7, ABI1, SRC
GO:0042886	amide transport	1339	46	31.73	1100	0.00495	0.21916	0.596386	1	The directed movement of an amide, any compound containing one, two, or three acyl groups attached to a nitrogen atom, into, out of or within a cell, or between cells, by means of some agent such as a transporter or pore	0.914629	-1.4711	IPO4, SLC25A32, SNAP29, CDC40, ADAM9, TSNAX, TSNARE1, TIAM1, SYTL3, CHUK, LIN7C, RPSA, PRKCE, SPIRE2, NDFIP2, ARFIP1, DNAJC19, RPL31, TOM1, MYO5A, RAB26, STXBP3, SMAD4, RAB8B, SLC46A1, SERP1, SNX8, RPS10, STX16, STX6, KPNA6, TNPO2, RPS21, NEURL1B, ZNF593, TOMM5, SNX19, SAR1B, TBC1D14, TBC1D9, KISS1, MIDN, BET1, GSK3B, LGR4, SUFU, DGKD, TOMM40L, ENTR1, THRA, STX18, AFTPH, SUPT6H, RAB12, VPS26A, TM…	EXOC5, SLU7, PPT1, UBE2D3, SRP19, RPL39, LYPLA1, CD58, LINC02210-CRHR1, TNPO1, SEC31A, NOV, RPGR, SCAMP1, SNX13, COG5, RABGAP1L, PIK3R1, TMEM167A, GPAM, RPL15, YWHAZ, HSP90AA1, FMN2, LYN, DNM1L, SNX2, VPS37A, KDELR3, CSNK2A2, SNX14, VPS36, BNIP3L, IFT74, WDR75, TOMM20, PEX3, VTA1, NCOA4, SFT2D1, SNX3, NPEPPS, NPM1, NUP35, SEC61A2, AP3B1, NUPL2, AP3M1, SEC24B, NUP54, WASHC4, RAB11A, PRNP, MON2, TV…
GO:0032774	RNA biosynthetic process	2322	72	55.03	2572	0.00511	0.63685	0.596552	1	The chemical reactions and pathways resulting in the formation of RNA, ribonucleic acid, one of the two main type of nucleic acid, consisting of a long, unbranched macromolecule formed from ribonucleotides joined in 3',5'-phosphodiester linkage. Includes polymerization of ribonucleotide monomers. Refers not only to transcription but also to e.g. viral RNA replication	1.18765	-1.70072	LRP8, KLF6, KAT6A, FOSL2, RNF6, SKIL, KLF12, ZNF326, PSMA6, POLR3K, GTF2A1, NPAT, EGLN2, H3F3A, HES4, ZNF623, ZBTB3, C1D, SOD2, HOXC13, ZNF160, TOB2, ZBTB18, ZNF770, CDC40, CDYL, GTF2H3, ZBTB8A, POFUT1, ARHGAP35, SMAD5, CREBZF, ZNF197, RXRB, TAF9B, ZNF618, PRKAA1, ZFP64, KLF16, CHUK, MTPN, ATXN7, CYR61, PDE8A, RPSA, AHR, TAF4, CDK9, HMG20A, HES6, NCOA3, UBC, MC1R, BAHD1, CCAR1, CHD6, BRCA1, GFI1,…	ZNF83, FAM220A, ZNF17, PSMD5, ZNF675, ZNF480, HAT1, SLU7, THRB, UBE2D3, TERF2IP, RPL39, DVL3, EPC1, ZNF75A, SUPT3H, RNF2, SLTM, RBM39, UCHL5, PSMD12, HIGD1A, NFE2L2, MIER3, ZNF625, MED21, YEATS4, INTS8, CREB1, SIN3A, ZKSCAN8, DMTF1, PHF10, MTERF2, E2F5, TAF5, PIK3R1, RHOQ, PRIM1, INTS7, INTS6, ADNP, ZNF318, ZMYND11, ZNF224, GTF2B, ITGB3BP, MBTPS2, RPL15, ZBTB1, COMMD2, PCNA, BAZ2A, IRF2, TMF1, SP…
GO:0022613	ribonucleoprotein complex biogenesis	390	18	9.24	3269	0.00513	0.97336	0.596552	1	A cellular process that results in the biosynthesis of constituent macromolecules, assembly, and arrangement of constituent parts of a complex containing RNA and proteins. Includes the biosynthesis of the constituent RNA and protein molecules, and those macromolecular modifications that are involved in synthesis or assembly of the ribonucleoprotein complex	0.730922	-1.24407	C1D, EXOSC6, RPSA, RPL31, RPS10, DDX6, NSUN5P1, RPS21, ZNF593, RPS19, RPL41, EDC3, RPL21, DHX37, RPS29, RPS8, RPL10, RPS12, RPL35A, FCF1, UTP11, RPL37A, GEMIN8, NOP53, NSUN5, RIOK2, SNRPB, RPS27A, DDX28, NPM3, RRNAD1, RPS23, URB2, RPS27L, RPL34, WDR77, AGO2, RPLP2, TGS1, RBM5, CELF1, GEMIN7	SLU7, RPL39, MTREX, RPF1, BRIX1, DIS3, MPHOSPH10, UTP3, RPL15, HSP90AA1, PTGES3, MRPL1, WDR75, DDX21, EIF2A, NPM1, NOP58, TAF9, PUM2, SBDS, RRP15, HEATR1, STRAP, EXOSC3, MTERF3, TRMT61B, RPL36A, THUMPD1, MRPS9, NUP88, YAE1D1, SDAD1, SRPK1, MALSU1, MAK16, PATL1, EIF4B, UTP4, RBMX, CNOT2, RPL17-C18orf32, RC3H1, FRG1, EIF4H, RPL17, RPL9, IMP4, CNOT1, NOL11, ZNHIT6, UTP15, RIOX2, ABCE1, EXOSC9, EIF5,…
GO:0010468	regulation of gene expression	2637	80	62.5	2322	0.00517	0.54001	0.596552	1	Any process that modulates the frequency, rate or extent of gene expression. Gene expression is the process in which a gene's coding sequence is converted into a mature gene product or products (proteins or RNA). This includes the production of an RNA transcript as well as any processing to produce a mature RNA product or an mRNA (for protein-coding genes) and the translation of that mRNA into pr…	1.20277	-1.6923	LRP8, KLF6, KAT6A, AL928654.3, FOSL2, RNF6, SKIL, KLF12, ZNF326, PSMA6, GTF2A1, NPAT, EGLN2, H3F3A, HES4, ZNF623, ZBTB3, C1D, EXOSC6, SOD2, HOXC13, CNPY2, MEX3D, ZNF160, TOB2, ZBTB18, ZNF770, CDYL, GTF2H3, TSNAX, PNPT1, ZBTB8A, POFUT1, ARHGAP35, SMAD5, CREBZF, ZNF197, RXRB, SECISBP2L, TAF9B, ZNF618, PRKAA1, ZFP64, KLF16, CHUK, MTPN, ATXN7, CYR61, PDE8A, RPSA, AHR, TAF4, CDK9, HMG20A, HES6, NDFIP2…	ZNF83, FAM220A, ZNF17, PSMD5, ZNF675, ZNF480, HAT1, THRB, UBE2D3, TERF2IP, RPL39, DVL3, EPC1, ZNF75A, SUPT3H, GSPT1, RNASEH2B, RNF2, SLTM, RBM39, UCHL5, TNPO1, PSMD12, NOV, EIF3E, HIGD1A, NFE2L2, MIER3, PDCD10, TENT2, ZNF625, MED21, YEATS4, CREB1, SIN3A, DIS3, RBM17, ZKSCAN8, DMTF1, PHF10, PAIP1, MTERF2, E2F5, TAF5, PIK3R1, RHOQ, RBM7, DYRK1A, ADNP, ZNF318, ZMYND11, ZNF224, GTF2B, ITGB3BP, GSPT2,…
GO:0051091	positive regulation of sequence-specific...	137	9	3.25	2817	0.00519	0.73551	0.596552	1	Any process that activates or increases the frequency, rate or extent of activity of a transcription factor, any factor involved in the initiation or regulation of transcription	0.797992	-0.893142	LRP8, PSMA6, CHUK, MTPN, UBC, PIDD1, KRAS, TRIM5, NLRP3, LRRFIP1, SPHK1, MAVS, TRIM32, RPS27A, IRAK2, WNT10B, TRADD, IKBKG, EDN1, TGFB1	TERF2IP, MBTPS2, EIF2AK2, UBE2N, NPM1, TRIM13, TAB2, GREM1, MTDH, RPS6KA5, STK3, RIPK2, ARID5B, NFKB1, TRIM21, WNT5A, FOSL1
GO:0051029	rRNA transport	5	2	0.12	23	0.00533	0.00533	0.597778	1	The directed movement of rRNA, ribosomal ribonucleic acid, into, out of or within a cell, or between cells, by means of some agent such as a transporter or pore	0.330451	0.330451	PNPT1, RPSA, TST
GO:2000630	positive regulation of miRNA metabolic p...	5	2	0.12	24	0.00533	0.00533	0.597778	1	Any process that activates or increases the frequency, rate or extent of miRNA metabolic process	0.257067	0.257067	PNPT1, HRAS	NFKB1
GO:0002221	pattern recognition receptor signaling p...	90	7	2.13	2651	0.00538	0.66793	0.597778	1	Any series of molecular signals generated as a consequence of a pattern recognition receptor (PRR) binding to one of its physiological ligands. PRRs bind pathogen-associated molecular pattern (PAMPs), structures conserved among microbial species, or damage-associated molecular pattern (DAMPs), endogenous molecules released from damaged cells	0.627526	-0.793295	CHUK, PRKCE, UBC, GFI1, TRIM5, LGR4, XIAP, MAVS, RPS27A, CYLD, IRAK2, ERBIN, CACTIN, IKBKG, TNIP1	UBE2D3, LYN, LY96, UBE2N, PUM2, TAB2, PUM1, RIPK2, TBK1
GO:0006605	protein targeting	486	21	11.52	2915	0.00548	0.78109	0.602174	1	The process of targeting specific proteins to particular membrane-bounded subcellular organelles. Usually requires an organelle specific protein sequence motif	0.726523	-1.22963	IPO4, RPSA, DNAJC19, RPL31, SMAD4, RAB8B, RPS10, KPNA6, TNPO2, RPS21, TOMM5, GSK3B, SUFU, TOMM40L, THRA, RPS19, RPL41, TGFBR1, UBL5, CDK1, DNLZ, RPL21, NLRP3, NFKBIE, RPS29, RPS8, RPL10, LEPROT, RPS12, RPL35A, IPO7, TOMM7, LMNA, CCDC22, VTI1A, RPL37A, SPHK1, TSPO, PPP3R1, MIEF1, MAVS, NAGPA, RPS27A, CYLD, IPO11, AKR1C3, JUN, RPS23, RPL34, ERBIN, MIEF2, POM121C, PEX5, YWHAG, ATG4B, KPNA1, RPLP2, P…	UBE2D3, SRP19, RPL39, TNPO1, NOV, PIK3R1, RPL15, YWHAZ, HSP90AA1, CSNK2A2, VPS36, BNIP3L, WDR75, TOMM20, PEX3, NCOA4, NPEPPS, NUP35, AP3B1, AP3M1, NUP54, PRNP, HNMT, SDCBP, KPNA3, ZFAND6, EGFR, GOLGA7, MFF, SH3GLB1, RPL36A, SRP72, GREM1, RAB6A, NUP88, LAMP2, SRP54, SRP14, SYNJ2BP, HSPA4, ZFYVE16, PEX1, MED1, SPCS2, RPL17-C18orf32, RANBP6, RPL17, CEP57, RPL9, PEX2, BMP4, KPNA4, SRP9, ATG4A, NF1, H…
GO:0009893	positive regulation of metabolic process	1830	59	43.37	1912	0.00554	0.42597	0.602174	1	Any process that activates or increases the frequency, rate or extent of the chemical reactions and pathways within a cell or an organism	1.19303	-1.44529	LRP8, KLF6, KAT6A, FOSL2, RNF6, SKP2, FGFR3, KLF12, PSMA6, KIF14, NPAT, EGLN2, H3F3A, VPS13C, EXOSC6, HOXC13, CNPY2, CARD9, ADAM9, PNPT1, DSCC1, TIAM1, SMAD5, ANAPC7, RXRB, TAF9B, PRKAA1, CHUK, MTPN, ATXN7, CYR61, PDE8A, AHR, TAF4, PRKCE, CDK9, SOCS4, NDFIP2, NCOA3, UBC, MC1R, PXYLP1, MRAP, CHD6, BRCA1, PIDD1, RTF1, RFK, TAF8, CDK8, CCNK, RASSF2, EGR1, SMAD4, DNA2, TNRC6B, PPM1F, KRAS, PRKAR1B, T…	PSMD5, THRB, TERF2IP, ARRDC3, DVL3, EPC1, SUPT3H, LINC02210-CRHR1, NRK, PSMD12, EIF3E, NFE2L2, PDCD10, MED21, YEATS4, CREB1, SIN3A, PAIP1, E2F5, PFN2, PIK3R1, RHOQ, MAP2K4, DYRK1A, ADNP, GTF2B, MBTPS2, PCNA, TMTC3, PRKACB, HSP90AA1, IRF2, LYN, SPP1, PTGES3, NFIL3, KDM5A, STAT1, PPP2R3C, EIF2AK2, AKIRIN2, ANKRD49, ZNF567, PSMA1, ANAPC10, EED, DCUN1D5, LUM, RLF, UBE2N, TMEM59, GLIS3, MSH2, BNIP3L, …
GO:0038093	Fc receptor signaling pathway	139	9	3.29	1258	0.0057	0.26246	0.612766	1	A series of molecular signals initiated by the binding of the Fc portion of an immunoglobulin to an Fc receptor on the surface of a signal-receiving cell, and ending with regulation of a downstream cellular process, e.g. transcription. The Fc portion of an immunoglobulin is its C-terminal constant region	0.754705	-1.1375	PSMA6, CHUK, DOCK1, ARPC1B, PRKCE, UBC, NRAS, KRAS, VAV2, PAK2, GAB2, ACTR2, PPP3R1, RPS27A, JUN, IKBKG, RAPGEF1, HRAS	PSMD5, PSMD12, ARPC5, PIK3R1, MAP2K4, HSP90AA1, LYN, PSMA1, UBE2N, NCK1, PSMC6, TAB2, CALM2, PSMA4, MAPK8, ACTR3, PSMD14, PIK3CB, SHC1, MYO10, PSMD6, CYFIP1, NCKAP1, NFKB1, ELMO2, PSMD7, ABI1, SRC
GO:0010604	positive regulation of macromolecule met...	1720	56	40.76	2117	0.00576	0.48071	0.612766	1	Any process that increases the frequency, rate or extent of the chemical reactions and pathways involving macromolecules, any molecule of high relative molecular mass, the structure of which essentially comprises the multiple repetition of units derived, actually or conceptually, from molecules of low relative molecular mass	1.19303	-1.43921	LRP8, KLF6, KAT6A, FOSL2, RNF6, SKP2, FGFR3, KLF12, PSMA6, KIF14, NPAT, EGLN2, H3F3A, EXOSC6, HOXC13, CNPY2, CARD9, ADAM9, PNPT1, DSCC1, TIAM1, SMAD5, ANAPC7, RXRB, TAF9B, PRKAA1, CHUK, MTPN, ATXN7, CYR61, PDE8A, AHR, TAF4, PRKCE, CDK9, SOCS4, NDFIP2, NCOA3, UBC, MC1R, PXYLP1, CHD6, BRCA1, PIDD1, RTF1, TAF8, CDK8, CCNK, RASSF2, EGR1, SMAD4, DNA2, TNRC6B, PPM1F, KRAS, PRKAR1B, TRIM5, SERP1, PCOLCE…	PSMD5, THRB, TERF2IP, ARRDC3, DVL3, EPC1, SUPT3H, NRK, PSMD12, EIF3E, NFE2L2, PDCD10, MED21, YEATS4, CREB1, SIN3A, PAIP1, E2F5, PFN2, PIK3R1, RHOQ, MAP2K4, DYRK1A, ADNP, GTF2B, MBTPS2, PCNA, TMTC3, PRKACB, HSP90AA1, IRF2, LYN, SPP1, PTGES3, NFIL3, KDM5A, STAT1, PPP2R3C, EIF2AK2, AKIRIN2, ANKRD49, ZNF567, PSMA1, ANAPC10, EED, DCUN1D5, LUM, RLF, UBE2N, GLIS3, MSH2, IFT74, IKZF4, NCK1, WDR75, DDX21,…
GO:0002768	immune response-regulating cell surface ...	193	11	4.57	683	0.00613	0.13037	0.642708	1	A series of molecular signals initiated by the binding of an extracellular ligand to a receptor on the surface of the target cell capable of activating, perpetuating, or inhibiting an immune response	0.791766	-1.15335	PSMA6, CARD9, CHUK, DOCK1, ARPC1B, PRKCE, UBC, NRAS, KRAS, VAV2, PAK2, PLCL2, PTPRJ, MUC1, GAB2, ACTR2, PPP3R1, RPS27A, EZR, CYLD, JUN, IKBKG, RAPGEF1, HRAS	PSMD5, PSMD12, ARPC5, PIK3R1, MAP2K4, PRKACB, HSP90AA1, LYN, LPXN, PSMA1, UBE2N, NCK1, PSMC6, PRNP, TAB2, CALM2, PSMA4, BTN3A1, LGALS3, MAPK8, ACTR3, RPS6KA5, PSMD14, PIK3CB, SHC1, RC3H1, MYO10, PSMD6, CYFIP1, NCKAP1, RIPK2, NFKB1, ELMO2, PSMD7, ABI1, SRC
GO:0045944	positive regulation of transcription fro...	588	24	13.94	25	0.00617	0.00617	0.642708	1	Any process that activates or increases the frequency, rate or extent of transcription from an RNA polymerase II promoter	0.948831	-1.23844	KLF6, FOSL2, KLF12, HOXC13, SMAD5, RXRB, TAF9B, CHUK, ATXN7, CYR61, AHR, TAF4, CDK9, NCOA3, UBC, MC1R, CHD6, BRCA1, RTF1, CDK8, CCNK, EGR1, SMAD4, KPNA6, ZNF593, TEF, MEF2D, KAT6B, GSK3B, THRA, SUPT6H, RNF10, GATA2, FOXO3, FOXM1, TOP2A, CASK, NLRP3, FLCN, POU2F1, AAMDC, ASH1L, LMNA, RBL1, TFAP4, NOTCH1, HIF1A, ATF3, MUC1, THRAP3, RUNX1, WDR5, PPP3R1, VDR, MAVS, FOXK2, HHEX, RPS27A, STAT5B, PITX1,…	THRB, EPC1, NFE2L2, MED21, YEATS4, CREB1, SIN3A, E2F5, PIK3R1, RHOQ, MBTPS2, IRF2, STAT1, AKIRIN2, ZNF567, LUM, RLF, GLIS3, IFT74, IKZF4, NCK1, EIF2A, NPM1, TAF9, PSMC6, TCF12, NAMPT, GTF2F2, DHX36, PIAS2, HSPH1, MKL2, ARID4B, PCGF5, MNAT1, UBE3A, EGFR, RTRAF, GTF2H1, NKX3-1, CKAP2, CBFB, CCNH, DDX5, ZBTB38, TFAP2A, CEBPZ, NR2F1, GREM1, MEIS3, ISL1, SUMO2, PLAC8, CAMTA2, MEIS2, ARF4, SP3, NCOA7, …
GO:0097191	extrinsic apoptotic signaling pathway	141	9	3.34	2519	0.00625	0.61634	0.64433	1	A series of molecular signals in which a signal is conveyed from the cell surface to trigger the apoptotic death of a cell. The pathway starts with either a ligand binding to a cell surface receptor, or a ligand being withdrawn from a cell surface receptor (e.g. in the case of signaling by dependence receptors), and ends when the execution phase of apoptosis is triggered	0.79217	-0.682807	FGFR3, SKIL, SH3RF1, BIRC6, BRCA1, PIDD1, GSK3B, PAK2, MADD, TGFBR1, FOXO3, DAPK3, LMNA, CTTN, ATF3, HTT, HIPK1, SIVA1, CYLD, TRADD, TIMP3, ITM2C, BAK1, SMAD3, CASP3, TGFB1	PIK3R1, ZMYND11, LGALS3, EYA4, CASP2, PHIP, YAP1, RPS6KB1, STK3, STRADB, BMP4, NF1, DEDD2, BLOC1S2, SRC
GO:0051649	establishment of localization in cell	1367	46	32.4	1253	0.00728	0.25995	0.735354	1	The directed movement of a substance or cellular entity, such as a protein complex or organelle, to a specific location within, or in the membrane of, a cell	0.937229	-1.46391	IPO4, KIF14, VPS13C, SNAP29, DNAJC6, CDC40, TSNARE1, TIAM1, SYTL3, LIN7C, RPSA, PRKCE, SPIRE2, UBC, ARFIP1, DNAJC19, RPL31, TOM1, MYO5A, SMAD4, RAB8B, SNX8, RPS10, STX16, STX6, KPNA6, AKAP13, TNPO2, RPS21, ZNF593, TOMM5, SAR1B, TBC1D14, BLOC1S4, TBC1D9, CDH2, DCTN5, BET1, GSK3B, SUFU, LEMD3, TOMM40L, THRA, STX18, SUPT6H, RAB12, VPS26A, TMED7, AP3D1, CBL, RPS19, LDLR, RPL41, DENND1A, EDEM1, TGFBR1…	GEM, SLU7, PPT1, UBE2D3, SRP19, RPL39, TNPO1, SEC31A, NOV, RPGR, PDCD10, TRAPPC6B, SNX13, COG5, RABGAP1L, PFN2, PIK3R1, DST, TMEM167A, RPL15, YWHAZ, HSP90AA1, CENPQ, FMN2, LYN, DCTN4, DNM1L, SNX2, VPS37A, CSNK2A2, ERO1A, NUSAP1, VPS36, BNIP3L, IFT74, WDR75, TOMM20, PEX3, DYNC1LI1, NCOA4, SNX3, NPEPPS, NPM1, NUP35, AP3B1, NUPL2, AP3M1, NEMF, TMEM230, SEC24B, NUP54, RAB11A, PRNP, MON2, CDC23, HNMT,…
GO:0080135	regulation of cellular response to stres...	435	19	10.31	26	0.00728	0.00728	0.735354	1	Any process that modulates the frequency, rate or extent of a cellular response to stress. Cellular response to stress is a change in state or activity of a cell (in terms of movement, secretion, enzyme production, gene expression, etc.) as a result of a stimulus indicating the organism is under stress. The stress is usually, but not necessarily, exogenous (e.g. temperature, humidity, ionizing ra…	0.968817	-1.33056	SKIL, CERS2, VPS13C, PPP4R2, SOD2, SH3RF1, CARD9, PNPT1, TIAM1, TAF9B, PDE8A, CDK9, FIGNL1, RPA3, BRCA1, RASSF2, KRAS, PARPBP, BABAM1, GSK3B, ARMT1, CHORDC1, DUSP10, EDEM1, FOXO3, FOXM1, DNAJC3, ERLEC1, OPA1, FAM168A, HIF1A, MUC1, CHEK2, SZT2, HMGCR, BFAR, P4HB, TRIM32, MAPT, EZR, UBAC2, ERP29, POM121C, XDH, EDN1, EIF2AK4, BAK1, HSPA5, RAPGEF1, SIRT6, RAE1, HRAS, RINT1, MAP2K1	ZNF675, TERF2IP, DVL3, RNASEH2B, NRK, USP25, NFE2L2, PDCD10, PIK3R1, MAP2K4, DYRK1A, ZMYND11, PCNA, HSP90AA1, LYN, SPP1, PTGES3, EIF2AK2, USP14, UBE2N, NCK1, PPP1R15B, NPM1, NUP35, TAF9, NUPL2, GCH1, NUP54, EEF1E1, OXR1, SDCBP, HSPH1, ARL6IP5, ABRAXAS1, EGFR, AIDA, NUP37, NKX3-1, HIPK3, MAP3K20, DDX5, FUT8, NUP205, TPT1, DNAJA1, DNAJC2, MBIP, EYA4, USP47, NUP88, GPS2, FMR1, RAD52, SERINC3, SETMAR…
GO:0043410	positive regulation of MAPK cascade	226	12	5.36	27	0.00744	0.00744	0.736634	1	Any process that activates or increases the frequency, rate or extent of signal transduction mediated by the MAPK cascade	0.835757	-1.0281	FGFR3, CARD9, ADAM9, TIAM1, PRKAA1, PDE8A, PRKCE, UBC, RASSF2, KRAS, TRIM5, AKAP13, KISS1, CDH2, MADD, TGFBR1, CDK1, SEMA7A, MAGED1, S1PR2, MAP2K3, CRKL, MAP3K15, EFNA1, HMGCR, RPS27A, ERP29, IRAK2, JUN, XDH, IKBKG, EDN1, CSPG4, RAPGEF1, PDGFRB, TGFB1, HRAS, F2R, MAP2K1	DVL3, NRK, PDCD10, MAP2K4, EIF2AK2, UBE2N, PDGFRA, SDCBP, TAB2, ARL6IP5, EGFR, MAP3K20, IQGAP3, RAP1B, LAMTOR3, IQGAP1, PIK3CB, SHC1, HACD3, ERN1, RAPGEF2, STK3, NPTN, BMP4, TAOK3, RYK, SPRY2, RIPK2, WNT5A, MAP3K9, SRC
GO:0019538	protein metabolic process	3235	94	76.67	2029	0.00744	0.45156	0.736634	1	The chemical reactions and pathways involving a specific protein, rather than of proteins in general. Includes protein modification	1.21224	-1.62268	ADAMTS1, LRP8, KAT6A, UNKL, RNF6, SKP2, FGFR3, PHC1, PSMA6, KIF14, EGLN2, H3F3A, PPP1R3D, SSH2, DNAJC6, PPP4R2, SH3RF1, CNPY2, CARD9, MEX3D, SOCS7, CDYL, ADAM9, SH3RF2, GTF2H3, ERMP1, DSCC1, POFUT1, TIAM1, SMAD5, BIRC6, D2HGDH, QPCTL, DCAF16, ANAPC7, SECISBP2L, CDK19, TAF9B, WFDC3, KLHL26, THSD4, PRKAA1, MTHFR, CHUK, MTPN, DTX4, ATXN7, CYR61, ARSI, PDE8A, RPSA, TIE1, PRKCE, CDK9, LIMK2, MTMR1, HM…	FAM220A, PSMD5, EXTL2, ZNF675, HAT1, OMA1, ASB3, PPT1, UBE2D3, TERF2IP, RPL39, MRPS30, ARRDC3, DVL3, LYPLA1, EPC1, EIF3M, SUPT3H, GSPT1, RNF2, SNRK, NRK, UCHL5, PSMD12, USP25, COL11A1, EIF3E, NFE2L2, PDCD10, MED21, YEATS4, AZIN1, PTPN12, CREB1, SIN3A, CCNG1, MARCH7, PAIP1, HPSE, PFN2, TAF5, PIK3R1, ITM2B, MAP2K4, PGM3, PRKD3, DYRK1A, ABRAXAS2, CPE, ADNP, ZMYND11, GSPT2, ASB14, MBTPS2, RPL15, BUB1…
GO:0038095	Fc-epsilon receptor signaling pathway	96	7	2.28	28	0.00762	0.00762	0.747059	1	A series of molecular signals initiated by the binding of the Fc portion of immunoglobulin E (IgE) to an Fc-epsilon receptor on the surface of a signal-receiving cell, and ending with regulation of a downstream cellular process, e.g. transcription. The Fc portion of an immunoglobulin is its C-terminal constant region	0.669696	-1.06895	PSMA6, CHUK, UBC, NRAS, KRAS, VAV2, PAK2, GAB2, PPP3R1, RPS27A, JUN, IKBKG, HRAS	PSMD5, PSMD12, PIK3R1, MAP2K4, LYN, PSMA1, UBE2N, PSMC6, TAB2, CALM2, PSMA4, MAPK8, PSMD14, PIK3CB, SHC1, PSMD6, NFKB1, PSMD7
GO:0002253	activation of immune response	256	13	6.07	1920	0.0078	0.42731	0.756731	1	Any process that initiates an immune response	0.80236	-1.21426	PSMA6, CARD9, CHUK, DOCK1, ARPC1B, PRKCE, UBC, NRAS, GFI1, KRAS, TRIM5, VAV2, LGR4, PAK2, XIAP, PLCL2, PTPRJ, MUC1, ACTR2, MAVS, RPS27A, EZR, CYLD, IRAK2, ERBIN, CACTIN, CGAS, IKBKG, RAPGEF1, HRAS, TNIP1	PSMD5, UBE2D3, PSMD12, SIN3A, ARPC5, PIK3R1, PRKACB, HSP90AA1, LYN, LY96, LPXN, PSMA1, UBE2N, NCK1, PUM2, PSMC6, PRNP, TAB2, PSMA4, BTN3A1, LGALS3, ACTR3, SKAP2, PROS1, RPS6KA5, PSMD14, PIK3CB, RC3H1, MYO10, PSMD6, C4BPB, PUM1, CYFIP1, CD59, NCKAP1, RIPK2, NFKB1, ELMO2, TBK1, PSMD7, ABI1, SRC
GO:0030952	establishment or maintenance of cytoskel...	6	2	0.14	29	0.00787	0.00787	0.756731	1	Any cellular process that results in the specification, formation or maintenance of polarized cytoskeletal structures	0.303431	0.303431	ARHGAP35, LMNA, RICTOR
GO:0042769	DNA damage response, detection of DNA da...	34	4	0.81	30	0.00814	0.00814	0.769159	1	The series of events required to receive a stimulus indicating DNA damage has occurred and convert it to a molecular signal	0.442146	-0.539014	UBC, RPA3, RFC1, RPS27A	PCNA, RFC4, DNAJA1, MRPS9, DTL, HMGA2
GO:0031325	positive regulation of cellular metaboli...	1711	55	40.55	2363	0.00817	0.55761	0.769159	1	Any process that activates or increases the frequency, rate or extent of the chemical reactions and pathways by which individual cells transform chemical substances	1.19303	-1.44529	LRP8, KLF6, KAT6A, FOSL2, RNF6, SKP2, FGFR3, KLF12, PSMA6, KIF14, NPAT, VPS13C, EXOSC6, HOXC13, CNPY2, CARD9, ADAM9, PNPT1, DSCC1, TIAM1, SMAD5, ANAPC7, RXRB, TAF9B, PRKAA1, CHUK, ATXN7, CYR61, PDE8A, AHR, TAF4, PRKCE, CDK9, SOCS4, NDFIP2, NCOA3, UBC, MC1R, PXYLP1, MRAP, CHD6, BRCA1, PIDD1, RTF1, TAF8, CDK8, CCNK, RASSF2, EGR1, SMAD4, DNA2, TNRC6B, PPM1F, KRAS, PRKAR1B, TRIM5, SERP1, PCOLCE2, KPN…	PSMD5, THRB, TERF2IP, ARRDC3, DVL3, EPC1, SUPT3H, LINC02210-CRHR1, NRK, PSMD12, EIF3E, NFE2L2, PDCD10, MED21, YEATS4, CREB1, SIN3A, PAIP1, E2F5, PFN2, PIK3R1, RHOQ, MAP2K4, DYRK1A, ADNP, GTF2B, MBTPS2, PCNA, TMTC3, PRKACB, HSP90AA1, IRF2, LYN, SPP1, PTGES3, KDM5A, STAT1, PPP2R3C, EIF2AK2, AKIRIN2, ANKRD49, ZNF567, PSMA1, ANAPC10, EED, DCUN1D5, LUM, RLF, UBE2N, TMEM59, GLIS3, MSH2, BNIP3L, IFT74, …
GO:0010518	positive regulation of phospholipase act...	18	3	0.43	31	0.00823	0.00823	0.769159	1	Any process that increases the frequency, rate or extent of phospholipase activity, the hydrolysis of a phospholipid	0.355172	-0.438821	FGFR3, CYR61, PRKCE, PDGFRB	PDGFRA, EGFR, AGTR1, GNA13, ARF4
GO:0060255	regulation of macromolecule metabolic pr...	3453	99	81.83	2664	0.00846	0.66973	0.777064	1	Any process that modulates the frequency, rate or extent of the chemical reactions and pathways involving macromolecules, any molecule of high relative molecular mass, the structure of which essentially comprises the multiple repetition of units derived, actually or conceptually, from molecules of low relative molecular mass	1.21516	-1.75355	LRP8, KLF6, KAT6A, AL928654.3, FOSL2, RNF6, SKP2, FGFR3, SKIL, KLF12, ZNF326, PSMA6, GTF2A1, KIF14, NPAT, EGLN2, H3F3A, HES4, ZNF623, ZBTB3, PPP1R3D, C1D, EXOSC6, PPP4R2, SOD2, SH3RF1, HOXC13, CNPY2, CARD9, MEX3D, SOCS7, ZNF160, TOB2, ZBTB18, ZNF770, CDYL, ADAM9, GTF2H3, TSNAX, PNPT1, ZBTB8A, DSCC1, POFUT1, ARHGAP35, TIAM1, SMAD5, BIRC6, CREBZF, ZNF197, ANAPC7, RXRB, SECISBP2L, TAF9B, WFDC3, ZNF6…	ITGB1, ZNF83, FAM220A, ZNF17, PSMD5, ZNF675, ZNF480, HAT1, THRB, UBE2D3, TERF2IP, RPL39, ARRDC3, DVL3, EPC1, ZNF75A, SUPT3H, GSPT1, RNASEH2B, RNF2, SLTM, RBM39, NRK, UCHL5, TNPO1, PSMD12, USP25, NOV, EIF3E, HIGD1A, NFE2L2, MIER3, PDCD10, TENT2, ZNF625, MED21, YEATS4, AZIN1, CREB1, SIN3A, DIS3, RBM17, ZKSCAN8, CCNG1, DMTF1, PHF10, PAIP1, MTERF2, E2F5, PFN2, TAF5, PIK3R1, RHOQ, ITM2B, MAP2K4, RBM7,…
GO:0008104	protein localization	1714	55	40.62	1021	0.00847	0.20814	0.777064	1	Any process in which a protein is transported to, or maintained in, a specific location	1.10978	-1.63999	FAM126A, AKAP10, MZT1, IPO4, KIF14, TAX1BP3, SNAP29, CDC40, ADAM9, TSNAX, TSNARE1, TIAM1, SYTL3, TUB, CHUK, LIN7C, RPSA, PRKCE, SPIRE2, TLN2, NDFIP2, ARFIP1, MRAP, LTBP1, NRAS, DNAJC19, RPL31, TOM1, MYO5A, RAB26, TAF8, ESCO2, STXBP3, SMAD4, RAB8B, LAMTOR4, TRIM5, SERP1, KNL1, SNX8, RPS10, STX16, STX6, KPNA6, TNPO2, RPS21, MECP2, NEURL1B, ZNF593, TOMM5, SNX19, SAR1B, TBC1D14, TBC1D9, OSBPL8, MIDN,…	NEDD1, ITGB1, EXOC5, SLU7, PPT1, UBE2D3, TERF2IP, SRP19, RPL39, MTBP, DVL3, LYPLA1, CD58, TNPO1, SEC31A, NOV, RPGR, SCAMP1, CEP55, SNX13, SIN3A, COG5, RABGAP1L, KIAA0586, PIK3R1, RHOQ, CPE, TMEM167A, GPAM, RPL15, YWHAZ, HSP90AA1, CENPQ, FMN2, LYN, DNM1L, SNX2, VPS37A, KDELR3, TMEM59, CSNK2A2, SNX14, VPS36, BNIP3L, RTN4, IFT74, WDR75, TOMM20, PEX3, VTA1, NCOA4, SFT2D1, SNX3, NPEPPS, SUMO1, NPM1, N…
GO:0050778	positive regulation of immune response	319	15	7.56	1592	0.00876	0.34349	0.791892	1	Any process that activates or increases the frequency, rate or extent of the immune response, the immunological reaction of an organism to an immunogenic stimulus	0.832648	-1.21784	PSMA6, EXOSC6, CARD9, CHUK, DOCK1, ARPC1B, PRKCE, UBC, NRAS, GFI1, KRAS, TRIM5, POLR3G, VAV2, LGR4, RPS19, PAK2, GATA2, XIAP, PLCL2, ATAD5, NLRP3, SEMA7A, PTPRJ, MUC1, GAB2, ACTR2, MAVS, RPS27A, EZR, CYLD, STAT5B, IRAK2, ERBIN, CACTIN, CGAS, IKBKG, EIF2AK4, RAPGEF1, TGFB1, HRAS, TNIP1, TNFRSF13C	PSMD5, UBE2D3, PSMD12, SIN3A, ARPC5, PIK3R1, ZBTB1, PRKACB, HSP90AA1, LYN, LY96, LPXN, PSMA1, UBE2N, MSH2, NCK1, GPRC5B, PUM2, PSMC6, PRNP, TAB2, PSMA4, CADM1, MSH6, EXOSC3, BTN3A1, SNX4, LGALS3, ACTR3, SKAP2, UNG, PROS1, RPS6KA5, PSMD14, PIK3CB, MED1, B2M, RC3H1, MYO10, PSMD6, C4BPB, PUM1, CYFIP1, CD59, NCKAP1, RIPK2, NFKB1, WNT5A, ELMO2, TBK1, PSMD7, ABI1, SRC
GO:0034660	ncRNA metabolic process	475	20	11.26	3289	0.00879	0.99558	0.791892	1	The chemical reactions and pathways involving non-coding RNA transcripts (ncRNAs)	0.878261	-1.20964	GTF2A1, C1D, EXOSC6, OSGEP, TRUB1, PNPT1, RPSA, CDK9, POP1, RPL31, TAF8, CCNK, RPS10, NSUN5P1, RPS21, INTS2, RPS19, LAGE3, RPL41, RPL21, DHX37, RPS29, SNAPC1, RPS8, RPL10, RNASEK, POU2F1, RPS12, RPL35A, FCF1, UTP11, SARS2, RPL37A, NSUN5, TRMT10A, RIOK2, RPS27A, NPM3, RRNAD1, PHAX, CTU1, RPS23, RPL34, RPRD1A, GTPBP3, AGO2, RPLP2, TRMT10C, SMAD3, NSUN6, ELL, HRAS, CD3EAP, TSEN54	RPL39, MTREX, RPF1, INTS8, DIS3, MPHOSPH10, TAF5, INTS7, INTS6, UTP3, GTF2B, RPL15, MRPL1, WDR75, DDX21, IARS, TSEN15, NOP58, TAF9, PUS7L, ALKBH8, EEF1E1, RARS, SBDS, GTF2F2, RRP15, HEATR1, NIFK, LCMT2, DARS2, RTRAF, EXOSC3, ELL2, GTF2E1, TRMT11, TRMT61B, RPL36A, THUMPD1, ALKBH1, GARS, MRPS9, WARS2, SSB, PRKRA, MAK16, DDX17, INTS12, UTP4, TARS, KIAA0391, RPL17-C18orf32, OSGEPL1, FRG1, RPL17, RPL9…
GO:0070372	regulation of ERK1 and ERK2 cascade	99	7	2.35	32	0.00897	0.00897	0.792105	1	Any process that modulates the frequency, rate or extent of signal transduction mediated by the ERK1 and ERK2 cascade	0.681367	-0.646078	FGFR3, TIAM1, CYR61, PDE8A, SMAD4, FLCN, SEMA7A, ATF3, APIP, HMGCR, EZR, JUN, TIMP3, RAPGEF1, RANBP9, PDGFRB, TGFB1, HRAS, F2R, MAP2K1, TNIP1	LYN, PDGFRA, EGFR, RAP1B, SYNJ2BP, SHC1, RAPGEF2, NPTN, BMP4, SPRY2, RIPK2, SPRY4, SRC
GO:0051247	positive regulation of protein metabolic...	915	33	21.68	579	0.00902	0.10804	0.792105	1	Any process that activates or increases the frequency, rate or extent of the chemical reactions and pathways involving a protein	1.05919	-1.36687	LRP8, SKP2, FGFR3, PSMA6, KIF14, EGLN2, CNPY2, CARD9, ADAM9, TIAM1, ANAPC7, PRKAA1, MTPN, CYR61, PDE8A, PRKCE, CDK9, SOCS4, NDFIP2, UBC, PXYLP1, BRCA1, PIDD1, RTF1, CCNK, RASSF2, EGR1, SMAD4, PPM1F, KRAS, PRKAR1B, TRIM5, SERP1, PCOLCE2, AKAP13, LARP4, MECP2, RNF166, OSBPL8, KISS1, CDH2, GSK3B, POMT2, JARID2, FNIP1, PAK2, MADD, EDEM1, TGFBR1, XIAP, CDK1, DNAJC3, NLRP3, UQCC2, ANAPC11, FLCN, SEMA7A…	PSMD5, TERF2IP, ARRDC3, DVL3, NRK, PSMD12, EIF3E, NFE2L2, PDCD10, PAIP1, PFN2, MAP2K4, DYRK1A, ADNP, TMTC3, PRKACB, LYN, PPP2R3C, EIF2AK2, AKIRIN2, PSMA1, ANAPC10, EED, DCUN1D5, UBE2N, NCK1, FAM129A, SUMO1, NPM1, GPRC5B, PSMC6, PRNP, PDGFRA, TOPORS, CDC23, AC068234.1, SDCBP, HSPH1, TAB2, CALM2, ARL6IP5, MNAT1, PSMA4, UBE3A, EGFR, BBS7, NKX3-1, FBXL5, MAP3K20, IQGAP3, CCNH, ANTXR1, RMND1, AGTR1, R…
GO:0019985	translesion synthesis	35	4	0.83	3306	0.00903	1	0.792105	1	The replication of damaged DNA by synthesis across a lesion in the template strand; a specialized DNA polymerase or replication complex inserts a defined nucleotide across from the lesion which allows DNA synthesis to continue beyond the lesion. This process can be mutagenic depending on the damaged nucleotide and the inserted nucleotide	0.440005	-0.670774	UBC, RPA3, RFC1, RPS27A	POLE2, ZBTB1, PCNA, RFC4, DTL, PRIMPOL
GO:0002764	immune response-regulating signaling pat...	261	13	6.19	1531	0.00911	0.32479	0.792174	1	The cascade of processes by which a signal interacts with a receptor, causing a change in the level or activity of a second messenger or other downstream target, and ultimately leading to the activation, perpetuation, or inhibition of an immune response	0.80236	-1.20932	PSMA6, CARD9, CHUK, DOCK1, ARPC1B, PRKCE, UBC, NRAS, GFI1, KRAS, TRIM5, VAV2, LGR4, PAK2, XIAP, PLCL2, PTPRJ, MUC1, GAB2, ACTR2, PPP3R1, MAVS, RPS27A, EZR, CYLD, IRAK2, JUN, ERBIN, CACTIN, IKBKG, RAPGEF1, HRAS, TNIP1	PSMD5, UBE2D3, PSMD12, ARPC5, PIK3R1, MAP2K4, PRKACB, HSP90AA1, LYN, LY96, LPXN, PSMA1, UBE2N, NCK1, PUM2, PSMC6, PRNP, TAB2, CALM2, PSMA4, BTN3A1, LGALS3, MAPK8, ACTR3, SKAP2, RPS6KA5, PSMD14, PIK3CB, SHC1, RC3H1, MYO10, PSMD6, PUM1, CYFIP1, NCKAP1, RIPK2, NFKB1, ELMO2, TBK1, PSMD7, ABI1, SRC
GO:0070727	cellular macromolecule localization	1276	43	30.24	1520	0.00936	0.32152	0.806897	1	Any process in which a macromolecule is transported to, and/or maintained in, a specific location at the level of a cell. Localization at the cellular level encompasses movement within the cell, from within the cell to the cell surface, or from one location to another at the surface of a cell	1.02248	-1.62021	FAM126A, MZT1, IPO4, TAX1BP3, MEX3D, CDC40, TSNARE1, TIAM1, SYTL3, TUB, LIN7C, RPSA, PRKCE, TLN2, ARFIP1, MRAP, NRAS, DNAJC19, RPL31, TOM1, MYO5A, RAB26, TAF8, ESCO2, SMAD4, RAB8B, LAMTOR4, KNL1, SNX8, RPS10, STX16, STX6, KPNA6, TNPO2, RPS21, ZNF593, TOMM5, SAR1B, TBC1D14, TBC1D9, OSBPL8, CDH2, KIAA0753, GSK3B, SUFU, TOMM40L, THRA, STX18, EFR3A, SUPT6H, VPS26A, AP3D1, RPS19, RPL41, TOR1AIP2, EDEM…	NEDD1, ITGB1, SLU7, UBE2D3, TERF2IP, SRP19, RPL39, MTBP, DVL3, LYPLA1, TNPO1, NOV, RPGR, SNX13, SIN3A, RABGAP1L, PIK3R1, RHOQ, CPE, RPL15, YWHAZ, HSP90AA1, CENPQ, DNM1L, SNX2, KDELR3, TMEM59, CSNK2A2, VPS36, BNIP3L, RTN4, IFT74, WDR75, TOMM20, PEX3, NCOA4, NPEPPS, SUMO1, NPM1, NUP35, AP3B1, NUPL2, AP3M1, SEC24B, NUP54, RAB11A, EPB41L3, PRNP, TOPORS, LEPROTL1, HNMT, SDCBP, HSPH1, VCL, CALM2, UPF2,…
GO:0002755	MyD88-dependent toll-like receptor signa...	19	3	0.45	33	0.00961	0.00961	0.821368	1	Any series of molecular signals generated as a consequence of binding to a toll-like receptor where the MyD88 adaptor molecule mediates transduction of the signal. Toll-like receptors directly bind pattern motifs from a variety of microbial sources to initiate innate immune response	0.322465	-0.329975	UBC, RPS27A, IRAK2, TNIP1	LY96, TAB2
GO:0015031	protein transport	1319	44	31.26	1519	0.01019	0.32108	0.853763	1	The directed movement of proteins into, out of or within a cell, or between cells, by means of some agent such as a transporter or pore	0.895715	-1.46684	IPO4, SNAP29, CDC40, ADAM9, TSNAX, TSNARE1, TIAM1, SYTL3, CHUK, LIN7C, RPSA, PRKCE, SPIRE2, NDFIP2, ARFIP1, DNAJC19, RPL31, TOM1, MYO5A, RAB26, STXBP3, SMAD4, RAB8B, SERP1, SNX8, RPS10, STX16, STX6, KPNA6, TNPO2, RPS21, NEURL1B, ZNF593, TOMM5, SNX19, SAR1B, TBC1D14, TBC1D9, MIDN, BET1, GSK3B, LGR4, SUFU, DGKD, TOMM40L, ENTR1, THRA, STX18, AFTPH, SUPT6H, RAB12, VPS26A, TMED7, AP3D1, RPS19, RPL41, …	EXOC5, SLU7, PPT1, UBE2D3, SRP19, RPL39, LYPLA1, CD58, TNPO1, SEC31A, NOV, RPGR, SCAMP1, SNX13, COG5, RABGAP1L, PIK3R1, TMEM167A, GPAM, RPL15, YWHAZ, HSP90AA1, FMN2, LYN, DNM1L, SNX2, VPS37A, KDELR3, CSNK2A2, SNX14, VPS36, BNIP3L, IFT74, WDR75, TOMM20, PEX3, VTA1, NCOA4, SFT2D1, SNX3, NPEPPS, NPM1, NUP35, SEC61A2, AP3B1, NUPL2, AP3M1, SEC24B, NUP54, WASHC4, RAB11A, PRNP, MON2, TVP23B, HNMT, SDCBP…
GO:0032481	positive regulation of type I interferon...	56	5	1.33	34	0.01021	0.01021	0.853763	1	Any process that activates or increases the frequency, rate, or extent of type I interferon production. Type I interferons include the interferon-alpha, beta, delta, episilon, zeta, kappa, tau, and omega gene families	0.570306	-0.437163	POLR3K, CHUK, POLR3G, RNF135, LRRFIP1, MAVS, CGAS	DHX36, ZC3HAV1, RIPK2, NFKB1, TBK1
GO:0051641	cellular localization	1735	55	41.12	1169	0.01083	0.23448	0.853763	1	A localization process that takes place at the cellular level; as a result of a cellular localization process, a substance or cellular entity, such as a protein complex or organelle, is transported to, and/or maintained in, a specific location within or in the membrane of a cell	1.07665	-1.67452	FAM126A, MZT1, IPO4, KIF14, VPS13C, TAX1BP3, SNAP29, DNAJC6, MEX3D, CDC40, TSNARE1, TIAM1, SYTL3, TUB, LIN7C, RPSA, PRKCE, SPIRE2, TLN2, UBC, ARFIP1, MRAP, NRAS, DNAJC19, RPL31, TOM1, MYO5A, RAB26, TAF8, ESCO2, TPGS1, SMAD4, RAB8B, BIN1, LAMTOR4, KNL1, SNX8, RPS10, STX16, STX6, KPNA6, AKAP13, TNPO2, RPS21, CLUH, ZNF593, TOMM5, SAR1B, TBC1D14, BLOC1S4, TBC1D9, OSBPL8, CDH2, DCTN5, BET1, KIAA0753, …	NEDD1, ITGB1, GEM, SLU7, PPT1, UBE2D3, TERF2IP, SRP19, RPL39, MTBP, DVL3, LYPLA1, TNPO1, SEC31A, NOV, RPGR, PDCD10, TRAPPC6B, SNX13, SIN3A, COG5, RABGAP1L, PFN2, PIK3R1, RHOQ, DST, CPE, TMEM167A, RPL15, YWHAZ, HSP90AA1, CENPQ, FMN2, LYN, DCTN4, DNM1L, SNX2, VPS37A, KDELR3, TMEM59, CSNK2A2, ERO1A, NUSAP1, VPS36, BNIP3L, RTN4, IFT74, WDR75, TOMM20, PEX3, DYNC1LI1, NCOA4, SNX3, NPEPPS, SUMO1, NPM1, …
GO:2000628	regulation of miRNA metabolic process	7	2	0.17	3307	0.01085	1	0.853763	1	Any process that modulates the frequency, rate or extent of miRNA metabolic process	0.181373	0.181373	PNPT1, HRAS	NFKB1
GO:0046907	intracellular transport	1215	41	28.79	1697	0.011	0.36752	0.853763	1	The directed movement of substances within a cell	0.893968	-1.3529	IPO4, VPS13C, SNAP29, DNAJC6, CDC40, TSNARE1, SYTL3, RPSA, SPIRE2, UBC, ARFIP1, DNAJC19, RPL31, TOM1, MYO5A, SMAD4, RAB8B, SNX8, RPS10, STX16, STX6, KPNA6, AKAP13, TNPO2, RPS21, ZNF593, TOMM5, SAR1B, TBC1D14, BLOC1S4, TBC1D9, DCTN5, BET1, GSK3B, SUFU, TOMM40L, THRA, STX18, SUPT6H, RAB12, VPS26A, TMED7, AP3D1, CBL, RPS19, LDLR, RPL41, DENND1A, EDEM1, TGFBR1, CLUAP1, GATA2, UBL5, STAM, CDK1, DNLZ, …	SLU7, UBE2D3, SRP19, RPL39, TNPO1, SEC31A, NOV, RPGR, TRAPPC6B, SNX13, COG5, RABGAP1L, PFN2, PIK3R1, DST, TMEM167A, RPL15, YWHAZ, HSP90AA1, FMN2, LYN, DCTN4, DNM1L, SNX2, VPS37A, CSNK2A2, VPS36, BNIP3L, IFT74, WDR75, TOMM20, PEX3, DYNC1LI1, NCOA4, SNX3, NPEPPS, NPM1, NUP35, AP3B1, NUPL2, AP3M1, NEMF, TMEM230, SEC24B, NUP54, RAB11A, PRNP, MON2, HNMT, SDCBP, CALM2, VPS54, UPF2, XPOT, OPHN1, KPNA3, …
GO:0050856	regulation of T cell receptor signaling ...	20	3	0.47	35	0.01111	0.01111	0.853763	1	Any process that modulates the frequency, rate or extent of signaling pathways initiated by the cross-linking of an antigen receptor on a T cell	0.244366	-0.287273	PTPRJ, EZR, CYLD	PRNP, LGALS3, RC3H1
GO:0009987	cellular process	8061	199	191.04	352	0.01151	0.06651	0.853763	1	Any process that is carried out at the cellular level, but not necessarily restricted to a single cell. For example, cell communication occurs among more than one cell, but occurs at the cellular level	1.59496	-1.888	TMX1, SPNS2, FAM126A, TUBB2A, TMEM38A, ADAMTS1, AKAP10, LRP8, KLF6, KAT6A, LRRC40, AL928654.3, UNKL, FOSL2, RNF6, INPP4B, SKP2, MZT1, FGFR3, SKIL, NHLRC2, KLF12, CERS2, PHC1, ARHGAP18, ZNF326, PSMA6, POLR3K, GTF2A1, IPO4, KIF14, GPC2, GAS2L3, NPAT, EGLN2, H3F3A, VPS13C, HES4, ZNF623, IPPK, TAX1BP3, ZBTB3, PPP1R3D, C1D, SLC25A32, EXOSC6, SNAP29, SSH2, OSGEP, DNAJC6, PPP4R2, SOD2, SH3RF1, HOXC13, C…	NEDD1, ITGB1, ZNF83, GEM, FAM220A, ZNF17, PSMD5, ATP2C1, CETN2, EXTL2, NT5DC4, POLE2, ZNF675, ZNF480, ELOVL7, HAT1, EXOC5, SLU7, OMA1, ASB3, PPCS, PPT1, THRB, UBE2D3, ATP5F1EP2, TERF2IP, SRP19, RPL39, MRPS30, ARRDC3, MTBP, XPR1, DVL3, LYPLA1, EPC1, CD58, MTREX, EIF3M, ZNF75A, PLPP5, SUPT3H, GSPT1, UGP2, MMADHC, RNASEH2B, YPEL5, RNF2, LINC02210-CRHR1, SLTM, RBM39, SNRK, NRK, RBMXL1, UCHL5, TNPO1, …
GO:0031349	positive regulation of defense response	212	11	5.02	2687	0.01199	0.67861	0.853763	1	Any process that activates or increases the frequency, rate or extent of a defense response	0.796976	-1.16364	PSMA6, CARD9, CDK19, CHUK, PRKCE, UBC, NRAS, GFI1, KRAS, TRIM5, POLR3G, LGR4, RPS19, PAK2, LDLR, XIAP, MUC1, MAVS, RPS27A, CYLD, STAT5B, IRAK2, ERBIN, CACTIN, CGAS, IKBKG, TGFB1, HRAS, TNIP1	PSMD5, UBE2D3, PSMD12, SIN3A, PRKACB, LYN, LY96, PSMA1, UBE2N, GPRC5B, PUM2, PSMC6, TAB2, PSMA4, CADM1, EGFR, SNX4, AGTR1, RPS6KA5, PSMD14, MED1, PSMD6, PUM1, GJA1, RIPK2, NFKB1, WNT5A, TBK1, PSMD7, OSMR, SRC
GO:2001238	positive regulation of extrinsic apoptot...	38	4	0.9	36	0.01204	0.01204	0.853763	1	Any process that activates or increases the frequency, rate or extent of extrinsic apoptotic signaling pathway	0.550702	-0.344092	SKIL, PIDD1, PAK2, DAPK3, ATF3, CYLD, TIMP3, ITM2C	STK3, NF1, DEDD2
GO:0042274	ribosomal small subunit biogenesis	59	5	1.4	773	0.01265	0.14932	0.853763	1	A cellular process that results in the biosynthesis of constituent macromolecules, assembly, and arrangement of constituent parts of a small ribosomal subunit; includes transport to the sites of protein synthesis	0.549725	-0.635635	RPSA, RPS10, RPS21, RPS19, RPS8, FCF1, UTP11, RIOK2, RPS27L	MPHOSPH10, UTP3, HEATR1, MRPS9, UTP4, NOL11, LTV1, RRP7BP
GO:0000717	nucleotide-excision repair, DNA duplex u...	21	3	0.5	37	0.01273	0.01273	0.853763	1	The unwinding, or local denaturation, of the DNA duplex to create a bubble around the site of the DNA damage	0.432237	-0.254021	GTF2H3, UBC, RPS27A, GTF2H2	CETN2, GTF2H1
GO:0050852	T cell receptor signaling pathway	106	7	2.51	38	0.0128	0.0128	0.853763	1	A series of molecular signals initiated by the cross-linking of an antigen receptor on a T cell	0.596768	-1.02678	PSMA6, CHUK, UBC, PAK2, PTPRJ, RPS27A, EZR, CYLD, IKBKG, HRAS	PSMD5, PSMD12, PIK3R1, PSMA1, UBE2N, NCK1, PSMC6, PRNP, TAB2, PSMA4, BTN3A1, LGALS3, PSMD14, PIK3CB, RC3H1, PSMD6, RIPK2, NFKB1, PSMD7
GO:0044267	cellular protein metabolic process	3009	87	71.31	2488	0.01289	0.60336	0.853763	1	The chemical reactions and pathways involving a specific protein, rather than of proteins in general, occurring at the level of an individual cell. Includes cellular protein modification	1.16246	-1.60321	LRP8, KAT6A, UNKL, RNF6, SKP2, FGFR3, PHC1, PSMA6, KIF14, EGLN2, H3F3A, PPP1R3D, SSH2, DNAJC6, PPP4R2, SH3RF1, CARD9, MEX3D, SOCS7, CDYL, ADAM9, SH3RF2, GTF2H3, DSCC1, POFUT1, TIAM1, SMAD5, BIRC6, D2HGDH, QPCTL, DCAF16, ANAPC7, SECISBP2L, CDK19, TAF9B, WFDC3, KLHL26, PRKAA1, MTHFR, CHUK, MTPN, DTX4, ATXN7, CYR61, ARSI, PDE8A, RPSA, TIE1, PRKCE, CDK9, LIMK2, MTMR1, HMG20A, SOCS4, NDFIP2, UBXN2A, N…	FAM220A, PSMD5, ZNF675, HAT1, OMA1, ASB3, PPT1, UBE2D3, TERF2IP, RPL39, MRPS30, ARRDC3, DVL3, LYPLA1, EPC1, EIF3M, SUPT3H, GSPT1, RNF2, SNRK, NRK, UCHL5, PSMD12, USP25, EIF3E, NFE2L2, PDCD10, MED21, YEATS4, PTPN12, CREB1, SIN3A, CCNG1, MARCH7, PAIP1, PFN2, TAF5, PIK3R1, ITM2B, MAP2K4, PGM3, PRKD3, DYRK1A, ABRAXAS2, CPE, ADNP, ZMYND11, GSPT2, ASB14, RPL15, BUB1, PCNA, BAZ2A, TMTC3, PRKACB, VRK2, H…
GO:0033108	mitochondrial respiratory chain complex ...	82	6	1.94	39	0.01296	0.01296	0.853763	1	The aggregation, arrangement and bonding together of a set of components to form a mitochondrial respiratory chain complex	0.575066	-0.605119	NDUFA11, PET100, NDUFA2, NDUFB2, UQCC2, COX14, NDUFB6, NDUFA9, NDUFAF4, TAZ	UQCRB, NDUFS1, AP003108.2, NDUFA12, NDUFAF6, SDHAF3, NUBPL, NDUFB1, NDUFA6
GO:0034613	cellular protein localization	1266	42	30	1719	0.01328	0.381	0.853763	1	Any process in which a protein is transported to, and/or maintained in, a specific location at the level of a cell. Localization at the cellular level encompasses movement within the cell, from within the cell to the cell surface, or from one location to another at the surface of a cell	1.00643	-1.62021	FAM126A, MZT1, IPO4, TAX1BP3, CDC40, TSNARE1, TIAM1, SYTL3, TUB, LIN7C, RPSA, PRKCE, TLN2, ARFIP1, MRAP, NRAS, DNAJC19, RPL31, TOM1, MYO5A, RAB26, TAF8, ESCO2, SMAD4, RAB8B, LAMTOR4, KNL1, SNX8, RPS10, STX16, STX6, KPNA6, TNPO2, RPS21, ZNF593, TOMM5, SAR1B, TBC1D14, TBC1D9, OSBPL8, CDH2, KIAA0753, GSK3B, SUFU, TOMM40L, THRA, STX18, EFR3A, SUPT6H, VPS26A, AP3D1, RPS19, RPL41, TOR1AIP2, EDEM1, TGFB…	NEDD1, ITGB1, SLU7, UBE2D3, TERF2IP, SRP19, RPL39, MTBP, DVL3, LYPLA1, TNPO1, NOV, RPGR, SNX13, SIN3A, RABGAP1L, PIK3R1, RHOQ, CPE, RPL15, YWHAZ, HSP90AA1, CENPQ, DNM1L, SNX2, KDELR3, TMEM59, CSNK2A2, VPS36, BNIP3L, RTN4, IFT74, WDR75, TOMM20, PEX3, NCOA4, NPEPPS, SUMO1, NPM1, NUP35, AP3B1, NUPL2, AP3M1, SEC24B, NUP54, RAB11A, EPB41L3, PRNP, TOPORS, LEPROTL1, HNMT, SDCBP, HSPH1, VCL, CALM2, UPF2,…
GO:0070371	ERK1 and ERK2 cascade	107	7	2.54	3308	0.01343	1	0.853763	1	An intracellular protein kinase cascade containing at least ERK1 or ERK2 (MAPKs), a MEK (a MAPKK) and a MAP3K. The cascade can also contain two additional tiers: the upstream MAP4K and the downstream MAP Kinase-activated kinase (MAPKAPK). The kinases in each tier phosphorylate and activate the kinases in the downstream tier to transmit a signal within a cell	0.681367	-0.685302	FGFR3, TIAM1, CYR61, PDE8A, SMAD4, FLCN, SEMA7A, ATF3, APIP, HMGCR, EZR, JUN, TIMP3, RAPGEF1, RANBP9, PDGFRB, TGFB1, HRAS, F2R, MAP2K1, TNIP1	LYN, PDGFRA, EGFR, IQGAP3, RAP1B, OXTR, SYNJ2BP, SHC1, MED1, RAPGEF2, NPTN, BMP4, SPRY2, RIPK2, ZFP36L1, SPRY4, SRC
GO:0034654	nucleobase-containing compound biosynthe...	2613	77	61.93	2919	0.01356	0.78229	0.853763	1	The chemical reactions and pathways resulting in the formation of nucleobases, nucleosides, nucleotides and nucleic acids	1.18765	-1.7204	LRP8, KLF6, KAT6A, FOSL2, RNF6, SKIL, KLF12, ZNF326, PSMA6, POLR3K, GTF2A1, NPAT, EGLN2, H3F3A, HES4, ZNF623, ZBTB3, C1D, SOD2, HOXC13, ZNF160, TOB2, ZBTB18, ZNF770, CDC40, CDYL, GTF2H3, ADSS, ZBTB8A, DSCC1, POFUT1, ARHGAP35, SMAD5, CREBZF, ZNF197, RXRB, TAF9B, ZNF618, PRKAA1, ZFP64, KLF16, CHUK, MTPN, ATXN7, CYR61, PDE8A, RPSA, AHR, TAF4, CDK9, HMG20A, HES6, NCOA3, UBC, MC1R, RPA3, BAHD1, CCAR1,…	ZNF83, FAM220A, ZNF17, PSMD5, POLE2, ZNF675, ZNF480, HAT1, SLU7, PPCS, THRB, UBE2D3, ATP5F1EP2, TERF2IP, RPL39, DVL3, EPC1, ZNF75A, SUPT3H, UGP2, RNF2, LINC02210-CRHR1, SLTM, RBM39, UCHL5, PSMD12, HIGD1A, NFE2L2, MIER3, ZNF625, MED21, YEATS4, INTS8, CREB1, SIN3A, ZKSCAN8, DMTF1, PHF10, MTERF2, E2F5, TAF5, PIK3R1, RHOQ, PRIM1, PGM3, INTS7, INTS6, ADNP, ZNF318, ZMYND11, ZNF224, GTF2B, ITGB3BP, MBTP…
GO:0000447	endonucleolytic cleavage in ITS1 to sepa...	8	2	0.19	40	0.01424	0.01424	0.853763	1	Endonucleolytic cleavage between the SSU-rRNA and the 5.8S rRNA of an rRNA molecule originally produced as a tricistronic rRNA transcript that contained the Small SubUnit (SSU) rRNA, the 5.8S rRNA, and the Large SubUnit (LSU) rRNA, in that order, from 5' to 3' along the primary transcript	0.314969	0.314969	RPSA, RPS21, FCF1
GO:0019852	L-ascorbic acid metabolic process	8	2	0.19	41	0.01424	0.01424	0.853763	1	The chemical reactions and pathways involving L-ascorbic acid, (2R)-2-[(1S)-1,2-dihydroxyethyl]-4-hydroxy-5-oxo-2,5-dihydrofuran-3-olate; L-ascorbic acid is vitamin C and has co-factor and anti-oxidant activities in many species	0.058287	0.058287	GSTO1
GO:0035640	exploration behavior	8	2	0.19	42	0.01424	0.01424	0.853763	1	The specific behavior of an organism in response to a novel environment or stimulus	0.121861	0.121861	PRKCE
GO:0010628	positive regulation of gene expression	1017	35	24.1	1699	0.0143	0.36904	0.853763	1	Any process that increases the frequency, rate or extent of gene expression. Gene expression is the process in which a gene's coding sequence is converted into a mature gene product or products (proteins or RNA). This includes the production of an RNA transcript as well as any processing to produce a mature RNA product or an mRNA (for protein-coding genes) and the translation of that mRNA into pr…	1.07688	-1.31649	KLF6, KAT6A, FOSL2, RNF6, KLF12, NPAT, H3F3A, HOXC13, SMAD5, RXRB, TAF9B, PRKAA1, CHUK, ATXN7, CYR61, AHR, TAF4, CDK9, NCOA3, UBC, MC1R, CHD6, BRCA1, RTF1, TAF8, CDK8, CCNK, EGR1, SMAD4, PPM1F, KRAS, SERP1, KPNA6, ATOH8, LARP4, MECP2, ZNF593, TEF, MEF2D, KAT6B, GSK3B, LGR4, THRA, SUPT6H, RNF10, LDLR, TGFBR1, NR1D2, GATA2, TAF15, FOXO3, FOXM1, TOP2A, CDK1, DNAJC3, CASK, NLRP3, UQCC2, FLCN, NAT14, …	THRB, DVL3, EPC1, SUPT3H, EIF3E, NFE2L2, PDCD10, MED21, YEATS4, CREB1, SIN3A, PAIP1, E2F5, PIK3R1, RHOQ, GTF2B, MBTPS2, IRF2, SPP1, NFIL3, KDM5A, STAT1, AKIRIN2, ANKRD49, ZNF567, LUM, RLF, GLIS3, IFT74, IKZF4, NCK1, WDR75, DDX21, FAM129A, EIF2A, NCOA4, NPM1, TAF9, TAF1D, MED4, PSMC6, TCF12, NAMPT, TOPORS, GTF2F2, DHX36, PIAS2, HSPH1, MKL2, ARID4B, HEATR1, PCGF5, MNAT1, YWHAH, NFYB, UBE3A, EGFR, R…
GO:0002753	cytoplasmic pattern recognition receptor...	40	4	0.95	3309	0.01438	1	0.853763	1	Any series of molecular signals generated as a consequence of a cytoplasmic pattern recognition receptor (PRR) binding to one of its physiological ligands. PRRs bind pathogen-associated molecular pattern (PAMPs), structures conserved among microbial species, or damage-associated molecular pattern (DAMPs), endogenous molecules released from damaged cells	0.521269	-0.510652	CHUK, UBC, XIAP, MAVS, RPS27A, CYLD, IRAK2, ERBIN, IKBKG	UBE2N, PUM2, TAB2, PUM1, RIPK2
GO:0034645	cellular macromolecule biosynthetic proc...	3062	88	72.57	2966	0.01445	0.80147	0.853763	1	The chemical reactions and pathways resulting in the formation of a macromolecule, any molecule of high relative molecular mass, the structure of which essentially comprises the multiple repetition of units derived, actually or conceptually, from molecules of low relative molecular mass, carried out by individual cells	1.18765	-1.73335	LRP8, KLF6, KAT6A, FOSL2, RNF6, SKIL, KLF12, ZNF326, PSMA6, POLR3K, GTF2A1, NPAT, EGLN2, H3F3A, HES4, ZNF623, ZBTB3, PPP1R3D, C1D, SOD2, HOXC13, MEX3D, ZNF160, ZBTB18, ZNF770, CDC40, CDYL, GTF2H3, ZBTB8A, DSCC1, POFUT1, ARHGAP35, SMAD5, CREBZF, ZNF197, RXRB, SECISBP2L, TAF9B, ZNF618, PRKAA1, ZFP64, KLF16, CHUK, MTPN, ATXN7, CYR61, PDE8A, RPSA, AHR, TAF4, CDK9, HMG20A, HES6, CSGALNACT2, NCOA3, UBC…	ZNF83, FAM220A, ZNF17, PSMD5, EXTL2, POLE2, ZNF675, ZNF480, HAT1, SLU7, THRB, UBE2D3, TERF2IP, RPL39, MRPS30, DVL3, EPC1, EIF3M, ZNF75A, SUPT3H, GSPT1, UGP2, RNF2, SLTM, RBM39, UCHL5, PSMD12, EIF3E, HIGD1A, NFE2L2, MIER3, ZNF625, MED21, YEATS4, INTS8, CREB1, SIN3A, ZKSCAN8, DMTF1, PHF10, PAIP1, MTERF2, E2F5, TAF5, PIK3R1, RHOQ, ITM2B, PRIM1, MAP2K4, PGM3, INTS7, INTS6, ADNP, ZNF318, ZMYND11, ZNF2…
GO:0000731	DNA synthesis involved in DNA repair	61	5	1.45	2538	0.01447	0.62035	0.853763	1	Synthesis of DNA that proceeds from the broken 3' single-strand DNA end uses the homologous intact duplex as the template	0.577547	-0.75364	UBC, RPA3, BRCA1, RMI1, DNA2, RFC1, RPS27A, BRCA2	POLE2, ZBTB1, PCNA, RFC4, RBBP8, DTL, PRIMPOL, EXO1
GO:0035666	TRIF-dependent toll-like receptor signal...	22	3	0.52	43	0.01449	0.01449	0.853763	1	Any series of molecular signals generated as a consequence of binding to a toll-like receptor where the TRIF adaptor mediates transduction of the signal. Toll-like receptors directly bind pattern motifs from a variety of microbial sources to initiate innate immune response	0.398721	-0.450417	CHUK, UBC, RPS27A, IKBKG	UBE2D3, LY96, TBK1
GO:0044710	single-organism metabolic process	2383	71	56.48	684	0.01461	0.13057	0.853763	1	A metabolic process - chemical reactions and pathways, including anabolism and catabolism, by which living organisms transform chemical substances - which involves a single organism	1.37705	-1.63981	TMX1, SPNS2, FAM126A, LRP8, INPP4B, FGFR3, CERS2, PSMA6, GPC2, EGLN2, VPS13C, IPPK, PPP1R3D, SLC25A32, EXOSC6, SOD2, SH3RF1, CARD9, LPGAT1, ADAM9, ADSS, PNPT1, FTCD, PI4K2B, POFUT1, TIAM1, D2HGDH, PNPLA7, MBOAT2, THTPA, UQCRHL, PRKAA1, MTHFR, CHUK, ACBD5, CYR61, ARSI, PDE8A, SLC5A3, NDUFA11, PRKCE, PSPH, MTMR1, FIGNL1, CSGALNACT2, UBC, UBIAD1, MC1R, PXYLP1, MRAP, BRCA1, NRAS, ST3GAL2, GFI1, DEGS1…	ITGB1, PSMD5, EXTL2, ZNF675, ELOVL7, OMA1, PPCS, PPT1, ATP5F1EP2, ARRDC3, DVL3, LYPLA1, PLPP5, UGP2, MMADHC, RNASEH2B, LINC02210-CRHR1, NRK, PSMD12, USP25, COL11A1, HIGD1A, NFE2L2, PDCD10, AZIN1, CREB1, SIN3A, GPD2, HPSE, AASDH, MINPP1, ABCC4, PIK3R1, RHOQ, MAP2K4, PGM3, PRKD3, NBPF9, ADNP, ZMYND11, GPAM, MBTPS2, SLC22A4, PCNA, LIPA, UQCRB, VRK2, LYN, SPP1, PTGES3, RASGRF1, KDM5A, ENTPD7, EIF2AK2…
GO:0071705	nitrogen compound transport	1461	47	34.62	1807	0.01491	0.39714	0.853763	1	The directed movement of nitrogen-containing compounds into, out of or within a cell, or between cells, by means of some agent such as a transporter or pore	0.923624	-1.4711	IPO4, SLC25A32, SNAP29, CDC40, ADAM9, TSNAX, PNPT1, TSNARE1, TIAM1, SYTL3, SLC12A2, FLVCR1, SLC17A5, CHUK, LIN7C, RPSA, PRKCE, SPIRE2, NDFIP2, ARFIP1, DNAJC19, RPL31, TOM1, MYO5A, RAB26, SLC25A24, SLC22A5, STXBP3, SMAD4, RAB8B, SLC46A1, SERP1, SNX8, RPS10, STX16, STX6, KPNA6, TNPO2, RPS21, MECP2, NEURL1B, ZNF593, TOMM5, SNX19, SAR1B, TBC1D14, TBC1D9, KISS1, MIDN, BET1, GSK3B, LGR4, SUFU, DGKD, TO…	EXOC5, SLU7, PPT1, UBE2D3, SRP19, RPL39, LYPLA1, CD58, LINC02210-CRHR1, TNPO1, SEC31A, NOV, RPGR, SCAMP1, AZIN1, SNX13, COG5, RABGAP1L, PIK3R1, TMEM167A, GPAM, RPL15, SLC22A4, YWHAZ, HSP90AA1, FMN2, LYN, DNM1L, SNX2, VPS37A, KDELR3, CSNK2A2, SNX14, VPS36, BNIP3L, IFT74, WDR75, TOMM20, PEX3, VTA1, NCOA4, SFT2D1, SNX3, NPEPPS, NPM1, NUP35, SEC61A2, AP3B1, NUPL2, SLC25A36, AP3M1, SEC24B, NUP54, WASH…
GO:0050776	regulation of immune response	403	17	9.55	1318	0.015	0.27301	0.853763	1	Any process that modulates the frequency, rate or extent of the immune response, the immunological reaction of an organism to an immunogenic stimulus	0.944356	-1.33281	SPNS2, PSMA6, EXOSC6, CARD9, CHUK, DOCK1, ARPC1B, PRKCE, IFNGR2, UBC, NRAS, GFI1, KRAS, TRIM5, POLR3G, RNF135, VAV2, LGR4, SUPT6H, RPS19, PAK2, DUSP10, GATA2, XIAP, PLCL2, ATAD5, NLRP3, SEMA7A, SAMHD1, PTPRJ, MUC1, GAB2, ACTR2, PPP3R1, NDFIP1, MAVS, RPS27A, EZR, CYLD, STAT5B, SPPL2B, GPR17, IRAK2, JUN, ERBIN, CACTIN, CGAS, IKBKG, EIF2AK4, RAPGEF1, FCRLB, SMAD3, TGFB1, HRAS, TNIP1, TNFRSF13C	ITGB1, PSMD5, UBE2D3, PSMD12, SIN3A, ARPC5, PIK3R1, MAP2K4, ZBTB1, PRKACB, HSP90AA1, LYN, LY96, STAT1, PPP2R3C, LPXN, PSMA1, UBE2N, MSH2, NCK1, SPPL2A, SUMO1, GPRC5B, PUM2, PSMC6, COL3A1, PRNP, TAB2, CALM2, PSMA4, CADM1, ATG5, MSH6, EXOSC3, BTN3A1, SNX4, LGALS3, MAPK8, ACTR3, JAK1, SKAP2, UNG, PROS1, FKBP1A, RPS6KA5, PSMD14, PIK3CB, SHC1, MED1, B2M, RC3H1, MYO10, PSMD6, C4BPB, PUM1, CYFIP1, CD59,…
GO:0009059	macromolecule biosynthetic process	3148	90	74.61	2843	0.01508	0.7471	0.853763	1	The chemical reactions and pathways resulting in the formation of a macromolecule, any molecule of high relative molecular mass, the structure of which essentially comprises the multiple repetition of units derived, actually or conceptually, from molecules of low relative molecular mass	1.18765	-1.73335	LRP8, KLF6, KAT6A, FOSL2, RNF6, SKIL, KLF12, ZNF326, PSMA6, POLR3K, GTF2A1, GPC2, NPAT, EGLN2, H3F3A, HES4, ZNF623, ZBTB3, PPP1R3D, C1D, SOD2, HOXC13, CNPY2, CARD9, MEX3D, ZNF160, TOB2, ZBTB18, ZNF770, CDC40, CDYL, GTF2H3, ZBTB8A, DSCC1, POFUT1, ARHGAP35, SMAD5, CREBZF, ZNF197, RXRB, SECISBP2L, TAF9B, ZNF618, PRKAA1, ZFP64, KLF16, CHUK, MTPN, ATXN7, CYR61, PDE8A, RPSA, AHR, TAF4, CDK9, HMG20A, HE…	ZNF83, FAM220A, ZNF17, PSMD5, EXTL2, POLE2, ZNF675, ZNF480, HAT1, SLU7, THRB, UBE2D3, TERF2IP, RPL39, MRPS30, DVL3, EPC1, EIF3M, ZNF75A, SUPT3H, GSPT1, UGP2, RNF2, SLTM, RBM39, UCHL5, PSMD12, EIF3E, HIGD1A, NFE2L2, MIER3, ZNF625, MED21, YEATS4, INTS8, CREB1, SIN3A, ZKSCAN8, DMTF1, PHF10, PAIP1, MTERF2, E2F5, TAF5, PIK3R1, RHOQ, ITM2B, PRIM1, MAP2K4, PGM3, INTS7, INTS6, ADNP, ZNF318, ZMYND11, ZNF2…
GO:0006886	intracellular protein transport	844	30	20	2518	0.01538	0.61623	0.853763	1	The directed movement of proteins in a cell, including the movement of proteins between specific compartments or structures within a cell, such as organelles of a eukaryotic cell	0.807852	-1.33356	IPO4, CDC40, TSNARE1, SYTL3, RPSA, ARFIP1, DNAJC19, RPL31, TOM1, SMAD4, RAB8B, SNX8, RPS10, STX16, STX6, KPNA6, TNPO2, RPS21, ZNF593, TOMM5, SAR1B, TBC1D14, TBC1D9, GSK3B, SUFU, TOMM40L, THRA, STX18, SUPT6H, VPS26A, AP3D1, RPS19, RPL41, EDEM1, TGFBR1, CLUAP1, UBL5, STAM, CDK1, DNLZ, TAP2, RPL21, NLRP3, NFKBIE, RPS29, ERLEC1, RPS8, RPL10, LEPROT, RPS12, RPL35A, IPO7, TOMM7, LMNA, IFT122, CTTN, CCD…	SLU7, UBE2D3, SRP19, RPL39, TNPO1, NOV, RPGR, SNX13, RABGAP1L, PIK3R1, RPL15, YWHAZ, HSP90AA1, SNX2, CSNK2A2, VPS36, BNIP3L, IFT74, WDR75, TOMM20, PEX3, NCOA4, NPEPPS, NPM1, NUP35, AP3B1, NUPL2, AP3M1, SEC24B, NUP54, PRNP, HNMT, SDCBP, UPF2, XPOT, KPNA3, YWHAH, ARCN1, ZFAND6, EGFR, NUP37, HSPB11, TBCK, GOLGA7, NUP205, MFF, SH3GLB1, RPL36A, SRP72, GREM1, RAB6A, NUP88, KIFAP3, LAMP2, RUNDC1, SRP54,…
GO:0045184	establishment of protein localization	1428	46	33.84	1652	0.01571	0.35849	0.853763	1	The directed movement of a protein to a specific location	1.01193	-1.54909	FAM126A, IPO4, KIF14, SNAP29, CDC40, ADAM9, TSNAX, TSNARE1, TIAM1, SYTL3, CHUK, LIN7C, RPSA, PRKCE, SPIRE2, NDFIP2, ARFIP1, NRAS, DNAJC19, RPL31, TOM1, MYO5A, RAB26, STXBP3, SMAD4, RAB8B, SERP1, SNX8, RPS10, STX16, STX6, KPNA6, TNPO2, RPS21, NEURL1B, ZNF593, TOMM5, SNX19, SAR1B, TBC1D14, TBC1D9, MIDN, CDH2, BET1, GSK3B, LGR4, SUFU, DGKD, TOMM40L, ENTR1, THRA, STX18, AFTPH, EFR3A, SUPT6H, RAB12, V…	ITGB1, EXOC5, SLU7, PPT1, UBE2D3, SRP19, RPL39, LYPLA1, CD58, TNPO1, SEC31A, NOV, RPGR, SCAMP1, CEP55, SNX13, COG5, RABGAP1L, KIAA0586, PIK3R1, RHOQ, TMEM167A, GPAM, RPL15, YWHAZ, HSP90AA1, FMN2, LYN, DNM1L, SNX2, VPS37A, KDELR3, TMEM59, CSNK2A2, SNX14, VPS36, BNIP3L, IFT74, WDR75, TOMM20, PEX3, VTA1, NCOA4, SFT2D1, SNX3, NPEPPS, NPM1, NUP35, SEC61A2, AP3B1, NUPL2, AP3M1, SEC24B, NUP54, WASHC4, R…
GO:0009896	positive regulation of catabolic process	312	14	7.39	44	0.01626	0.01626	0.853763	1	Any process that activates or increases the frequency, rate or extent of the chemical reactions and pathways resulting in the breakdown of substances	0.87908	-1.09717	PSMA6, EGLN2, VPS13C, ADAM9, PNPT1, ANAPC7, PRKAA1, PRKCE, SOCS4, UBC, TNRC6B, RNF166, GSK3B, RAB12, EDEM1, CDK1, UQCC2, ANAPC11, FLCN, ANAPC2, TOMM7, HIF1A, CCDC22, SH3D19, RDX, NDFIP1, HTT, TRIM32, RPS27A, EZR, IRS1, RAB3GAP2, ATG4B, IKBKG, EIF2AK4, AGO2, RNF114, RAB3GAP1	PSMD5, PSMD12, NFE2L2, TMTC3, PSMA1, ANAPC10, TMEM59, BNIP3L, SUMO1, TRIM13, PSMC6, CDC23, PSMA4, BBS7, FBXL5, SH3BP4, HNRNPR, SH3GLB1, SUMO2, TIPARP, FMR1, ZC3HAV1, MTDH, PSMD14, RNF14, PIK3CB, ARIH1, ABHD5, RC3H1, PSMD6, CNOT1, SUPV3L1, C4BPB, UBE2E1, VPS11, EPM2A, PABPC1, CDC27, GJA1, RIPK2, ZFP36L1, RAB7A, PTTG1IP, TRIM21, WNT5A, TBK1, PSMD7, BECN1
GO:0060193	positive regulation of lipase activity	23	3	0.55	3310	0.01638	1	0.853763	1	Any process that increases the frequency, rate or extent of lipase activity, the hydrolysis of a lipid or phospholipid	0.414429	-0.496402	FGFR3, CYR61, PRKCE, PDGFRB	PDGFRA, EGFR, AGTR1, GNA13, ARF4, ABHD5
GO:0019222	regulation of metabolic process	3693	103	87.52	2766	0.01652	0.71491	0.853763	1	Any process that modulates the frequency, rate or extent of the chemical reactions and pathways within a cell or an organism	1.21516	-1.75355	LRP8, KLF6, KAT6A, AL928654.3, FOSL2, RNF6, SKP2, FGFR3, SKIL, KLF12, ZNF326, PSMA6, GTF2A1, KIF14, NPAT, EGLN2, H3F3A, VPS13C, HES4, ZNF623, ZBTB3, PPP1R3D, C1D, EXOSC6, PPP4R2, SOD2, SH3RF1, HOXC13, CNPY2, CARD9, MEX3D, SOCS7, ZNF160, TOB2, ZBTB18, ZNF770, CDYL, ADAM9, SH3RF2, GTF2H3, TSNAX, PNPT1, ZBTB8A, DSCC1, POFUT1, ARHGAP35, TIAM1, SMAD5, BIRC6, CREBZF, ZNF197, ANAPC7, RXRB, SECISBP2L, TA…	ITGB1, ZNF83, FAM220A, ZNF17, PSMD5, ZNF675, ZNF480, HAT1, THRB, UBE2D3, TERF2IP, RPL39, ARRDC3, DVL3, LYPLA1, EPC1, ZNF75A, SUPT3H, GSPT1, RNASEH2B, RNF2, LINC02210-CRHR1, SLTM, RBM39, NRK, UCHL5, TNPO1, PSMD12, USP25, NOV, EIF3E, HIGD1A, NFE2L2, MIER3, PDCD10, TENT2, ZNF625, MED21, YEATS4, AZIN1, CREB1, SIN3A, DIS3, RBM17, ZKSCAN8, CCNG1, DMTF1, MPHOSPH10, PHF10, PAIP1, MTERF2, E2F5, PFN2, TAF5…
GO:0030512	negative regulation of transforming grow...	42	4	1	45	0.01698	0.01698	0.853763	1	Any process that stops, prevents, or reduces the frequency, rate or extent of any TGF-beta receptor signaling pathway	0.594458	-0.374618	SKIL, UBC, LTBP1, LEMD3, TGFBR1, RPS27A, HSPA5, ZNF451, SMAD3, TGFB1	SMURF2, STRAP, SMAD2
GO:0044271	cellular nitrogen compound biosynthetic ...	3040	87	72.05	2949	0.01706	0.79459	0.853763	1	The chemical reactions and pathways resulting in the formation of organic and inorganic nitrogenous compounds	1.19229	-1.7204	LRP8, KLF6, KAT6A, FOSL2, RNF6, SKIL, KLF12, CERS2, ZNF326, PSMA6, POLR3K, GTF2A1, NPAT, EGLN2, H3F3A, HES4, ZNF623, ZBTB3, C1D, SOD2, HOXC13, MEX3D, ZNF160, TOB2, ZBTB18, ZNF770, CDC40, CDYL, GTF2H3, ADSS, ZBTB8A, DSCC1, POFUT1, ARHGAP35, SMAD5, CREBZF, ZNF197, RXRB, SECISBP2L, TAF9B, ZNF618, PRKAA1, ZFP64, KLF16, CHUK, MTPN, ATXN7, CYR61, PDE8A, RPSA, AHR, TAF4, CDK9, HMG20A, HES6, NCOA3, UBC, …	ZNF83, FAM220A, ZNF17, PSMD5, POLE2, ZNF675, ZNF480, HAT1, SLU7, PPCS, THRB, UBE2D3, ATP5F1EP2, TERF2IP, RPL39, MRPS30, DVL3, EPC1, EIF3M, ZNF75A, SUPT3H, GSPT1, UGP2, RNF2, LINC02210-CRHR1, SLTM, RBM39, UCHL5, PSMD12, EIF3E, HIGD1A, NFE2L2, MIER3, ZNF625, MED21, YEATS4, INTS8, AZIN1, CREB1, SIN3A, ZKSCAN8, DMTF1, PHF10, PAIP1, MTERF2, AASDH, E2F5, TAF5, PIK3R1, RHOQ, PRIM1, PGM3, INTS7, INTS6, A…
GO:0051704	multi-organism process	1214	40	28.77	1539	0.01745	0.33274	0.853763	1	A biological process which involves another organism of the same or different species	1.02183	-1.47284	ADAMTS1, SKIL, POLR3K, H3F3A, CARD9, TOB2, CDYL, ADAM9, TSNAX, CLGN, SMAD5, CREBZF, CDK19, KLHL26, FNDC3A, CHUK, RPSA, TAF4, PRKCE, CDK9, LIMK2, IFNGR2, UBC, CAMLG, GFI1, RPL31, SLC22A5, HIST1H2BJ, CCNK, IGFBP5, TPGS1, SPATA24, SMAD4, PALM3, KRAS, BIN1, REC8, TRIM5, UMPS, KNL1, RPS10, KPNA6, DDX6, POLR3G, RPS21, MECP2, DSG2, NPHP1, KISS1, TUBD1, LGR4, GOLGA3, LNPEP, THRA, SCMH1, SUPT6H, APOL2, SB…	ITGB1, CETN2, THRB, RPL39, XPR1, RNF2, LINC02210-CRHR1, NRK, TNPO1, CREB1, SIN3A, TAF5, PIK3R1, MAP2K4, PGM3, DYRK1A, ZMYND11, GPAM, GTF2B, RPL15, BUB1, VRK2, FMN2, LYN, TMF1, LY96, SPP1, KDM5A, STAT1, PPP2R3C, EIF2AK2, AKIRIN2, ANKRD49, VPS37A, CSNK2A2, MSH2, BNIP3L, NCK1, DDX21, VTA1, SMURF2, DYNC1LI1, SNX3, ZNF35, SUMO1, NPM1, NUP35, TRIM13, NUPL2, GCH1, NECTIN3, PUM2, NUP54, NAMPT, TRIM36, PD…
GO:0010811	positive regulation of cell-substrate ad...	64	5	1.52	46	0.01753	0.01753	0.853763	1	Any process that increases the frequency, rate or extent of cell-substrate adhesion. Cell-substrate adhesion is the attachment of a cell to the underlying substrate via adhesion molecules	0.625677	-0.548752	DOCK1, CYR61, PRKCE, PPM1F, GSK3B, PREX1, PTPRJ, EDIL3, CRKL, DOCK5, SMAD3	UTRN, PLEKHA2, IQGAP1, CDK6, VEGFC, HAS2, NID1, EMP2
GO:0032508	DNA duplex unwinding	64	5	1.52	47	0.01753	0.01753	0.853763	1	The process in which interchain hydrogen bonds between two strands of DNA are broken or 'melted', generating a region of unpaired single strands	0.549189	-0.4645	GTF2H3, UBC, DNA2, GINS1, RPS27A, GTF2H2, MCM2, TWNK	CETN2, GTF2H1, SUPV3L1
GO:0007084	mitotic nuclear envelope reassembly	9	2	0.21	48	0.01803	0.01803	0.853763	1	The cell cycle process that results in reformation of the nuclear envelope during mitotic cell division	0.118167	0.118167	LMNA	PPP2R2A
GO:0090343	positive regulation of cell aging	9	2	0.21	49	0.01803	0.01803	0.853763	1	Any process that increases the rate, frequency, or extent of cell aging. Cell aging is the progression of the cell from its inception to the end of its lifespan	-0.00129789	-0.00129789	KRAS, LMNA	EEF1E1, HMGA2
GO:0098779	positive regulation of macromitophagy in...	9	2	0.21	50	0.01803	0.01803	0.853763	1		0.248009	0.248009	VPS13C, TOMM7
GO:1901526	positive regulation of macromitophagy	9	2	0.21	51	0.01803	0.01803	0.853763	1	Any process that activates or increases the frequency, rate or extent of macromitophagy	0.248009	0.248009	VPS13C, TOMM7
GO:1904152	regulation of retrograde protein transpo...	9	2	0.21	52	0.01803	0.01803	0.853763	1		0.231018	0.231018	EDEM1, ERLEC1, UBAC2
GO:0008283	cell proliferation	1034	35	24.51	53	0.01806	0.01806	0.853763	1	The multiplication or reproduction of cells, resulting in the expansion of a cell population	1.13212	-1.33822	ADAMTS1, AL928654.3, FOSL2, SKP2, FGFR3, CERS2, KIF14, H3F3A, TAX1BP3, SOD2, TOB2, TIAM1, BIRC6, PRKAA1, CYR61, AHR, CDK9, FIGNL1, RPA3, CCAR1, BRCA1, TBX2, TAF8, IGFBP5, EGR1, SMAD4, KRAS, BIN1, ATOH8, POLR3G, GINS1, PLXNB1, MECP2, RC3H2, MDM4, CDCA7L, TENM4, PRG4, COPS9, KISS1, CDH2, LGR4, PDXK, JARID2, PBRM1, RNF10, TGFBR1, GATA2, FOXO3, XIAP, FOXM1, PLCL2, CDK1, HILPDA, ATAD5, CASK, SLC35F6, …	ITGB1, MTBP, RNASEH2B, NRK, NOV, PDCD10, CREB1, MARCH7, HPSE, ABCC4, ZMYND11, GPAM, GNG5, BUB1, PCNA, LIPA, SYF2, IRF2, LYN, RASGRF1, STAT1, EIF2AK2, AKIRIN2, NAP1L1, COPS2, KRIT1, RTN4, IFT74, NCK1, USPL1, NPM1, NAMPT, EEF1E1, PRNP, PDGFRA, TOPORS, SBDS, PSMG1, AC068234.1, SDCBP, PAK1IP1, CIP2A, STRAP, PPP2R5C, C18orf54, MNAT1, BLZF1, EGFR, NKX3-1, TBCK, BTN3A1, MAP3K20, IQGAP3, C3orf58, SH3BP4,…
GO:0048519	negative regulation of biological proces...	2764	80	65.51	943	0.01808	0.187	0.853763	1	Any process that stops, prevents, or reduces the frequency, rate or extent of a biological process. Biological processes are regulated by many means; examples include the control of gene expression, protein modification or interaction with a protein or substrate molecule	1.20164	-1.65927	ADAMTS1, LRP8, KAT6A, RNF6, FGFR3, SKIL, KLF12, CERS2, PSMA6, KIF14, NPAT, H3F3A, VPS13C, TAX1BP3, C1D, EXOSC6, SOD2, SH3RF1, CNPY2, MEX3D, SOCS7, TOB2, ZBTB18, CDYL, SH3RF2, TSNAX, PNPT1, ARHGAP35, BIRC6, CREBZF, ANAPC7, VILL, TAF9B, WFDC3, PRKAA1, KLF16, MTPN, KREMEN1, ATXN7, CYR61, PDE8A, RPSA, AHR, TIE1, PRKCE, CDK9, HMG20A, HES6, FIGNL1, SOCS4, NDFIP2, UBC, MC1R, BAHD1, CCAR1, LTBP1, BRCA1, …	ITGB1, FAM220A, PSMD5, ZNF675, HAT1, OMA1, PPT1, THRB, UBE2D3, TERF2IP, RPL39, ARRDC3, MTBP, DVL3, LYPLA1, EPC1, GSPT1, RNASEH2B, RNF2, LINC02210-CRHR1, NRK, UCHL5, PSMD12, USP25, NOV, EIF3E, HIGD1A, NFE2L2, PDCD10, TENT2, AZIN1, PTPN12, SNX13, CREB1, SIN3A, DIS3, MARCH7, MPHOSPH10, LRRC17, PAIP1, PFN2, PIK3R1, RHOQ, ITM2B, MAP2K4, INTS7, DYRK1A, ADNP, ZMYND11, GPAM, ZNF224, GSPT2, RPL15, ZBTB1, …
GO:1903845	negative regulation of cellular response...	43	4	1.02	54	0.01838	0.01838	0.853763	1		0.594458	-0.374618	SKIL, UBC, LTBP1, LEMD3, TGFBR1, RPS27A, HSPA5, ZNF451, SMAD3, TGFB1	SMURF2, STRAP, SMAD2
GO:0050854	regulation of antigen receptor-mediated ...	24	3	0.57	55	0.0184	0.0184	0.853763	1	Any process that modulates the frequency, rate or extent of signaling pathways initiated by the cross-linking of an antigen receptor on a B- or T cell	0.312728	-0.498868	PLCL2, PTPRJ, EZR, CYLD	LYN, LPXN, PRNP, LGALS3, RC3H1
GO:2000273	positive regulation of receptor activity	24	3	0.57	56	0.0184	0.0184	0.853763	1	Any process that activates or increases the frequency, rate or extent of receptor activity	0.418709	-0.290609	PRKCE, NCOA3, HTT, GSTO1	CALM2, GREM1, MED1
GO:0050851	antigen receptor-mediated signaling path...	114	7	2.7	57	0.01847	0.01847	0.853763	1	A series of molecular signals initiated by the cross-linking of an antigen receptor on a B or T cell	0.613028	-1.07509	PSMA6, CHUK, UBC, PAK2, PLCL2, PTPRJ, RPS27A, EZR, CYLD, IKBKG, HRAS	PSMD5, PSMD12, PIK3R1, LYN, LPXN, PSMA1, UBE2N, NCK1, PSMC6, PRNP, TAB2, PSMA4, BTN3A1, LGALS3, PSMD14, PIK3CB, RC3H1, PSMD6, RIPK2, NFKB1, PSMD7
GO:0071824	protein-DNA complex subunit organization	169	9	4.01	1182	0.01899	0.24089	0.853763	1	Any process in which macromolecules aggregate, disaggregate, or are modified, resulting in the formation, disassembly, or alteration of a protein-DNA complex	0.867937	-1.12669	KAT6A, IPO4, H3F3A, GTF2H3, TAF9B, TAF4, UBC, RPA3, HIST1H2BJ, KNL1, KAT6B, THRA, SUPT6H, MIS18BP1, HJURP, H1FX, TSPYL4, RPS27A, GTF2H2, WNT10B, MCM2, SPTY2D1	CETN2, HAT1, CREB1, GTF2B, ITGB3BP, CENPQ, NAP1L1, NPM1, TAF9, PSMC6, CENPI, MNAT1, GTF2H1, CCNH, SENP6, SET, GMNN, HIST2H2BE, RAD52, RBBP4, HIST1H2BC, CENPK, CENPU
GO:0019438	aromatic compound biosynthetic process	2653	77	62.87	3009	0.01964	0.82436	0.853763	1	The chemical reactions and pathways resulting in the formation of aromatic compounds, any substance containing an aromatic carbon ring	1.18765	-1.7204	LRP8, KLF6, KAT6A, FOSL2, RNF6, SKIL, KLF12, ZNF326, PSMA6, POLR3K, GTF2A1, NPAT, EGLN2, H3F3A, HES4, ZNF623, ZBTB3, C1D, SOD2, HOXC13, ZNF160, TOB2, ZBTB18, ZNF770, CDC40, CDYL, GTF2H3, ADSS, ZBTB8A, DSCC1, POFUT1, ARHGAP35, SMAD5, CREBZF, ZNF197, RXRB, TAF9B, ZNF618, PRKAA1, ZFP64, KLF16, CHUK, MTPN, ATXN7, CYR61, PDE8A, RPSA, AHR, TAF4, CDK9, HMG20A, HES6, NCOA3, UBC, MC1R, RPA3, BAHD1, CCAR1,…	ZNF83, FAM220A, ZNF17, PSMD5, POLE2, ZNF675, ZNF480, HAT1, SLU7, PPCS, THRB, UBE2D3, ATP5F1EP2, TERF2IP, RPL39, DVL3, EPC1, ZNF75A, SUPT3H, UGP2, RNF2, LINC02210-CRHR1, SLTM, RBM39, UCHL5, PSMD12, HIGD1A, NFE2L2, MIER3, ZNF625, MED21, YEATS4, INTS8, CREB1, SIN3A, ZKSCAN8, DMTF1, PHF10, MTERF2, E2F5, TAF5, PIK3R1, RHOQ, PRIM1, PGM3, INTS7, INTS6, ADNP, ZNF318, ZMYND11, ZNF224, GTF2B, ITGB3BP, MBTP…
GO:0006119	oxidative phosphorylation	90	6	2.13	58	0.01975	0.01975	0.853763	1	The phosphorylation of ADP to ATP that accompanies the oxidation of a metabolite through the operation of the respiratory chain. Oxidation of compounds establishes a proton gradient across the membrane, providing the energy for ATP synthesis	0.621902	-0.680391	UQCRHL, NDUFA11, NDUFA2, NDUFB2, MECP2, CDK1, UQCC2, NDUFB6, NDUFA9, UQCRQ, COX10, TAZ	UQCRB, MSH2, NDUFS1, AP003108.2, ATP5F1C, PMPCB, NDUFA12, NDUFB1, NDUFA6
GO:0006283	transcription-coupled nucleotide-excisio...	66	5	1.56	59	0.01979	0.01979	0.853763	1	The nucleotide-excision repair process that carries out preferential repair of DNA lesions on the actively transcribed strand of the DNA duplex. In addition, the transcription-coupled nucleotide-excision repair pathway is required for the recognition and repair of a small subset of lesions that are not recognized by the global genome nucleotide excision repair pathway	0.53701	-0.706546	GTF2H3, UBC, RPA3, AQR, RFC1, RPS27A, GTF2H2	PCNA, COPS2, MNAT1, RFC4, GTF2H1, CCNH, TCEA1, COPS8, POLR2A
GO:0009891	positive regulation of biosynthetic proc...	1042	35	24.69	1987	0.02009	0.44193	0.853763	1	Any process that activates or increases the frequency, rate or extent of the chemical reactions and pathways resulting in the formation of substances	1.07635	-1.3259	KLF6, KAT6A, FOSL2, RNF6, KLF12, NPAT, HOXC13, CNPY2, DSCC1, SMAD5, RXRB, TAF9B, PRKAA1, CHUK, MTPN, ATXN7, CYR61, AHR, TAF4, CDK9, NCOA3, UBC, MC1R, PXYLP1, MRAP, CHD6, BRCA1, RTF1, TAF8, CDK8, CCNK, EGR1, SMAD4, DNA2, SERP1, KPNA6, ATOH8, LARP4, MECP2, ZNF593, TEF, MEF2D, KAT6B, GSK3B, LGR4, POMT2, THRA, SUPT6H, RNF10, LDLR, TGFBR1, NR1D2, GATA2, TAF15, FOXO3, FOXM1, TOP2A, CDK1, WRAP53, DNAJC3…	THRB, DVL3, EPC1, SUPT3H, LINC02210-CRHR1, EIF3E, NFE2L2, MED21, YEATS4, CREB1, SIN3A, PAIP1, E2F5, PIK3R1, RHOQ, MAP2K4, ADNP, GTF2B, MBTPS2, PCNA, HSP90AA1, IRF2, SPP1, PTGES3, KDM5A, STAT1, AKIRIN2, ANKRD49, ZNF567, LUM, RLF, GLIS3, IFT74, IKZF4, NCK1, WDR75, FAM129A, EIF2A, NCOA4, NPM1, TAF9, MED4, PSMC6, TCF12, NAMPT, PDGFRA, TOPORS, GTF2F2, DHX36, PIAS2, HSPH1, CALM2, MKL2, ARID4B, HEATR1, …
GO:0010517	regulation of phospholipase activity	25	3	0.59	3311	0.02055	1	0.853763	1	Any process that modulates the frequency, rate or extent of phospholipase activity, the hydrolysis of a phospholipid	0.385884	-0.656946	FGFR3, CYR61, PRKCE, PDGFRB	PPT1, PDGFRA, EGFR, AGTR1, GNA13, ARF4, RGS2
GO:0018130	heterocycle biosynthetic process	2660	77	63.04	3022	0.02091	0.83112	0.853763	1	The chemical reactions and pathways resulting in the formation of heterocyclic compounds, those with a cyclic molecular structure and at least two different atoms in the ring (or rings)	1.18765	-1.7204	LRP8, KLF6, KAT6A, FOSL2, RNF6, SKIL, KLF12, ZNF326, PSMA6, POLR3K, GTF2A1, NPAT, EGLN2, H3F3A, HES4, ZNF623, ZBTB3, C1D, SOD2, HOXC13, ZNF160, TOB2, ZBTB18, ZNF770, CDC40, CDYL, GTF2H3, ADSS, ZBTB8A, DSCC1, POFUT1, ARHGAP35, SMAD5, CREBZF, ZNF197, RXRB, TAF9B, ZNF618, PRKAA1, ZFP64, KLF16, CHUK, MTPN, ATXN7, CYR61, PDE8A, RPSA, AHR, TAF4, CDK9, HMG20A, HES6, NCOA3, UBC, MC1R, RPA3, BAHD1, CCAR1,…	ZNF83, FAM220A, ZNF17, PSMD5, POLE2, ZNF675, ZNF480, HAT1, SLU7, PPCS, THRB, UBE2D3, ATP5F1EP2, TERF2IP, RPL39, DVL3, EPC1, ZNF75A, SUPT3H, UGP2, RNF2, LINC02210-CRHR1, SLTM, RBM39, UCHL5, PSMD12, HIGD1A, NFE2L2, MIER3, ZNF625, MED21, YEATS4, INTS8, CREB1, SIN3A, ZKSCAN8, DMTF1, PHF10, MTERF2, E2F5, TAF5, PIK3R1, RHOQ, PRIM1, PGM3, INTS7, INTS6, ADNP, ZNF318, ZMYND11, ZNF224, GTF2B, ITGB3BP, MBTP…
GO:0043123	positive regulation of I-kappaB kinase/N...	117	7	2.77	60	0.02099	0.02099	0.853763	1	Any process that activates or increases the frequency, rate or extent of I-kappaB kinase/NF-kappaB signaling	0.696353	-0.924913	CARD9, CHUK, PRKCE, NDFIP2, UBC, TRIM5, AKAP13, S100A4, S100A13, CCDC22, SPHK1, NDFIP1, MAVS, TRIM32, RPS27A, ZDHHC17, TRADD, IKBKG, F2R	ATP2C1, TERF2IP, UBE2N, TRIM13, GPRC5B, TAB2, VAPA, GREM1, MTDH, TRAF3IP2, FKBP1A, SLC20A1, GJA1, RIPK2, TFG, PLEKHG5, TBK1, ECT2
GO:0009615	response to virus	172	9	4.08	61	0.02103	0.02103	0.853763	1	Any process that results in a change in state or activity of a cell or an organism (in terms of movement, secretion, enzyme production, gene expression, etc.) as a result of a stimulus from a virus	0.742364	-1.00314	POLR3K, CARD9, CREBZF, CHUK, IFNGR2, TRIM5, POLR3G, PAK2, DNAJC3, NLRP3, SAMHD1, MAVS, CGAS, IKBKG, EIF2AK4, BATF3	XPR1, SIN3A, GPAM, STAT1, EIF2AK2, BNIP3L, DDX21, PUM2, DHX36, OAS3, FAM111A, IVNS1ABP, TPT1, FMR1, ZC3HAV1, PRKRA, TRAF3IP2, SERINC3, AP1S2, CDK6, B2M, IFI44, PUM1, HMGA2, TBK1, AP2A2, FOSL1, CCT5, APOBEC3C, HNRNPUL1, BECN1, SRC
GO:0033036	macromolecule localization	1875	57	44.44	1641	0.02141	0.35325	0.853763	1	Any process in which a macromolecule is transported to, or maintained in, a specific location	1.20721	-1.63999	SPNS2, FAM126A, AKAP10, MZT1, IPO4, KIF14, TAX1BP3, SNAP29, MEX3D, CDC40, ADAM9, TSNAX, PNPT1, TSNARE1, TIAM1, SYTL3, TUB, CHUK, LIN7C, RPSA, PRKCE, SPIRE2, TLN2, NDFIP2, ARFIP1, MRAP, LTBP1, NRAS, DNAJC19, RPL31, TOM1, MYO5A, RAB26, TAF8, ESCO2, STXBP3, SMAD4, RAB8B, LAMTOR4, TRIM5, SERP1, KNL1, SNX8, RPS10, STX16, STX6, KPNA6, TNPO2, RPS21, MECP2, NEURL1B, ZNF593, TOMM5, SNX19, SAR1B, TBC1D14, …	NEDD1, ITGB1, EXOC5, SLU7, PPT1, UBE2D3, TERF2IP, SRP19, RPL39, MTBP, DVL3, LYPLA1, CD58, LINC02210-CRHR1, TNPO1, SEC31A, NOV, RPGR, SCAMP1, CEP55, SNX13, SIN3A, COG5, RABGAP1L, KIAA0586, ABCC4, PIK3R1, RHOQ, CPE, TMEM167A, GPAM, RPL15, YWHAZ, HSP90AA1, CENPQ, FMN2, LYN, TMF1, SPP1, DNM1L, SNX2, VPS37A, SPX, KDELR3, GULP1, TMEM59, CSNK2A2, SNX14, VPS36, BNIP3L, RTN4, IFT74, WDR75, TOMM20, PEX3, V…
GO:0044249	cellular biosynthetic process	3725	103	88.28	2627	0.02156	0.66057	0.853763	1	The chemical reactions and pathways resulting in the formation of substances, carried out by individual cells	1.20565	-1.73461	LRP8, KLF6, KAT6A, FOSL2, RNF6, INPP4B, FGFR3, SKIL, KLF12, CERS2, ZNF326, PSMA6, POLR3K, GTF2A1, NPAT, EGLN2, H3F3A, HES4, ZNF623, ZBTB3, PPP1R3D, C1D, SOD2, HOXC13, CARD9, MEX3D, ZNF160, LPGAT1, TOB2, ZBTB18, ZNF770, CDC40, CDYL, GTF2H3, ADSS, ZBTB8A, DSCC1, PI4K2B, POFUT1, ARHGAP35, SMAD5, MBOAT2, CREBZF, ZNF197, RXRB, SECISBP2L, TAF9B, ZNF618, PRKAA1, ZFP64, KLF16, CHUK, MTPN, ATXN7, CYR61, P…	ZNF83, FAM220A, ZNF17, PSMD5, EXTL2, POLE2, ZNF675, ZNF480, ELOVL7, HAT1, SLU7, PPCS, PPT1, THRB, UBE2D3, ATP5F1EP2, TERF2IP, RPL39, MRPS30, DVL3, EPC1, EIF3M, ZNF75A, SUPT3H, GSPT1, UGP2, MMADHC, RNF2, LINC02210-CRHR1, SLTM, RBM39, UCHL5, PSMD12, EIF3E, HIGD1A, NFE2L2, MIER3, ZNF625, MED21, YEATS4, INTS8, AZIN1, CREB1, SIN3A, ZKSCAN8, DMTF1, PHF10, PAIP1, MTERF2, AASDH, E2F5, TAF5, PIK3R1, RHOQ,…
GO:1903507	negative regulation of nucleic acid-temp...	692	25	16.4	62	0.02202	0.02202	0.853763	1	Any process that stops, prevents or reduces the frequency, rate or extent of nucleic acid-templated transcription	1.07575	-1.43848	LRP8, KAT6A, SKIL, KLF12, NPAT, H3F3A, C1D, TOB2, ZBTB18, CDYL, ARHGAP35, CREBZF, TAF9B, KLF16, AHR, HMG20A, HES6, UBC, BAHD1, CCAR1, BRCA1, GFI1, TBX2, GON4L, RTF1, EGR1, SMAD4, PPM1F, ATOH8, MECP2, CBX6, MDM4, SUV39H2, KAT6B, TSC22D3, LGR4, SUFU, THRA, SCMH1, SUPT6H, TNRC18, JARID2, FNIP1, SBNO2, ZHX2, MPHOSPH8, NKX3-2, NR1D2, GATA2, FOXO3, FOXM1, FLCN, RPL10, ZNF703, MAGED1, ZFHX3, POU2F1, FAM…	FAM220A, ZNF675, HAT1, THRB, UBE2D3, EPC1, RNF2, CREB1, SIN3A, ZMYND11, ZNF224, ZBTB1, BAZ2A, IRF2, NFIL3, KDM5A, STAT1, AKIRIN2, ZNF567, BTAF1, EED, COPS2, GLIS3, IKZF4, NCK1, SMURF2, UBA3, SUMO1, RBAK, ZBTB33, ZNF85, AEBP2, BASP1, NR2C1, WWP1, STRAP, CHCHD3, NKX3-1, NFE2L3, DR1, DDX5, ZBTB38, MTERF3, ZNF189, CGGBP1, TFAP2A, ZNF93, BPTF, NR2F1, GREM1, SET, ISL1, USP47, HIST1H2AC, GPS2, RBBP8, ME…
GO:0003009	skeletal muscle contraction	10	2	0.24	63	0.02219	0.02219	0.853763	1	A process in which force is generated within skeletal muscle tissue, resulting in a change in muscle geometry. Force generation involves a chemo-mechanical energy conversion step that is carried out by the actin/myosin complex activity, which generates force through ATP hydrolysis. In the skeletal muscle, the muscle contraction takes advantage of an ordered sarcomeric structure and in most cases …	0.167771	0.167771	CHUK, JSRP1, GSTO1	RPS6KB1
GO:0019081	viral translation	10	2	0.24	64	0.02219	0.02219	0.853763	1	A process by which viral mRNA is translated into viral protein, using the host cellular machinery	-0.0226333	-0.0226333	PTBP1, EIF2AK4	SSB
GO:0031125	rRNA 3'-end processing	10	2	0.24	3312	0.02219	1	0.853763	1	Any process involved in forming the mature 3' end of an rRNA molecule	0.180209	0.180209	EXOSC6, RPSA, RPS21	EXOSC3
GO:0032228	regulation of synaptic transmission, GAB...	10	2	0.24	65	0.02219	0.02219	0.853763	1	Any process that modulates the frequency, rate or extent of GABAergic synaptic transmission, the process of communication from a neuron to another neuron across a synapse using the neurotransmitter gamma-aminobutyric acid (GABA)	0.123077	0.123077	PRKCE, KRAS, PLCL2	OXTR, NF1
GO:0061003	positive regulation of dendritic spine m...	10	2	0.24	66	0.02219	0.02219	0.853763	1	Any process that modulates the rate, frequency, or extent of dendritic spine morphogenesis, the process in which the anatomical structures of a dendritic spine are generated and organized. A dendritic spine is a protrusion from a dendrite and a specialized subcellular compartment involved in synaptic transmission	0.147427	0.147427	LRP8, TIAM1, OPA1, ACTR2	DNM1L, CAPRIN1
GO:0065004	protein-DNA complex assembly	146	8	3.46	1461	0.02261	0.30645	0.853763	1	The aggregation, arrangement and bonding together of proteins and DNA molecules to form a protein-DNA complex	0.867937	-1.12669	KAT6A, IPO4, H3F3A, GTF2H3, TAF9B, TAF4, UBC, RPA3, HIST1H2BJ, KNL1, KAT6B, THRA, MIS18BP1, HJURP, H1FX, TSPYL4, RPS27A, GTF2H2, WNT10B, MCM2, SPTY2D1	CETN2, HAT1, CREB1, GTF2B, ITGB3BP, CENPQ, NAP1L1, NPM1, TAF9, PSMC6, CENPI, MNAT1, GTF2H1, CCNH, SENP6, SET, GMNN, HIST2H2BE, RAD52, RBBP4, HIST1H2BC, CENPK, CENPU
GO:0000460	maturation of 5.8S rRNA	26	3	0.62	67	0.02284	0.02284	0.853763	1	Any process involved in the maturation of a precursor 5.8S ribosomal RNA (rRNA) molecule into a mature 5.8S rRNA molecule	0.426168	-0.589101	C1D, RPSA, RPS21, FCF1	MTREX, RPF1, RRP15, EXOSC3, MAK16
GO:0045071	negative regulation of viral genome repl...	26	3	0.62	68	0.02284	0.02284	0.853763	1	Any process that stops, prevents, or reduces the frequency, rate or extent of viral genome replication	0.330676	-0.614428	CCNK, MAVS, EIF2AK4, TNIP1	EIF2AK2, OAS3, FAM111A, VAPA, ZC3HAV1, SRPK1, HMGA2, SRPK2, APOBEC3C
GO:0070266	necroptotic process	26	3	0.62	69	0.02284	0.02284	0.853763	1	A programmed necrotic cell death process which begins when a cell receives a signal (e.g. a ligand binding to a death receptor or to a Toll-like receptor), and proceeds through a series of biochemical events (signaling pathways), characterized by activation of receptor-interacting serine/threonine-protein kinase 1 and/or 3 (RIPK1/3, also called RIP1/3), and which typically lead to common morpholo…	0.389881	-0.414633	UBC, PGAM5, RPS27A, CYLD, TRADD	LY96, DNM1L, MLKL
GO:0007265	Ras protein signal transduction	204	10	4.83	70	0.02317	0.02317	0.853763	1	A series of molecular signals within the cell that are mediated by a member of the Ras superfamily of proteins switching to a GTP-bound active state	0.819697	-0.97734	KIF14, TAX1BP3, ARHGAP35, TIAM1, CHUK, EPS8L1, TRIO, NRAS, SHOC2, KRAS, AKAP13, VAV2, PREX1, MADD, DENND1A, FOXM1, PLEKHG3, GPR4, FLCN, CRKL, RASSF1, ARHGAP44, ARF6, RDX, PLEKHG4, GPR17, JUN, DENND4B, RAPGEF1, PDGFRB, HRAS, F2R, ARFGEF2	ITGB1, RASGRF1, DOK3, RASA1, ARHGAP5, COL3A1, DNMBP, IQGAP3, SOS2, ARHGEF12, AGTR1, RAP1B, GNA13, SYNJ2BP, NOTCH2, HACE1, F2RL2, SHC1, HACD3, CTNNAL1, RAPGEF2, CDC42EP3, CYFIP1, MET, NF1, SPRY2, STAMBP, EPS8, ROBO1, NCKAP1, RRAS2, PLEKHG5, ECT2, PSD3, PPP2CB, ARHGEF26, PLEKHG7
GO:0002224	toll-like receptor signaling pathway	69	5	1.64	3313	0.02352	1	0.853763	1	Any series of molecular signals generated as a consequence of binding to a toll-like receptor. Toll-like receptors directly bind pattern motifs from a variety of microbial sources to initiate innate immune response	0.582645	-0.668718	CHUK, PRKCE, UBC, GFI1, LGR4, RPS27A, IRAK2, CACTIN, IKBKG, TNIP1	UBE2D3, LYN, LY96, TAB2, RIPK2, TBK1
GO:0001315	age-dependent response to reactive oxyge...	1	1	0.02	71	0.0237	0.0237	0.853763	1	Any process that results in a change in state or activity of a cell or an organism (in terms of movement, secretion, enzyme production, gene expression, etc.) as a result of reactive oxygen species, where the change varies according to the age of the cell or organism	0.967669	0.967669	SOD2
GO:0002041	intussusceptive angiogenesis	1	1	0.02	72	0.0237	0.0237	0.853763	1	The formation of new blood vessels as a result of the insertion and extension of lumenal tissue pillars	0.782856	0.782856	CYR61
GO:0003068	regulation of systemic arterial blood pr...	1	1	0.02	73	0.0237	0.0237	0.853763	1	The regulation of blood pressure mediated by acetylcholine signaling. Acetylcholine is an acetic acid ester of the organic base choline and functions as a neurotransmitter	0.967669	0.967669	SOD2
GO:0003069	acetylcholine-mediated vasodilation invo...	1	1	0.02	74	0.0237	0.0237	0.853763	1	The process in which acetylcholine signaling causes vasodilation, resulting in a change in blood pressure	0.967669	0.967669	SOD2
GO:0003070	regulation of systemic arterial blood pr...	1	1	0.02	75	0.0237	0.0237	0.853763	1	The regulation of blood pressure mediated by a neurotransmitter. A neurotransmitter is any of a group of substances that are released on excitation from the axon terminal of a presynaptic neuron of the central or peripheral nervous system and travel across the synaptic cleft to either excite or inhibit the target cell	0.967669	0.967669	SOD2
GO:0006117	acetaldehyde metabolic process	1	1	0.02	76	0.0237	0.0237	0.853763	1	The chemical reactions and pathways involving acetaldehyde, a colorless, flammable liquid intermediate in the metabolism of alcohol	0.371234	0.371234
GO:0006253	dCTP catabolic process	1	1	0.02	77	0.0237	0.0237	0.853763	1	The chemical reactions and pathways resulting in the breakdown of dCTP, deoxycytidine triphosphate	0.671166	0.671166	DCTPP1
GO:0009149	pyrimidine nucleoside triphosphate catab...	1	1	0.02	78	0.0237	0.0237	0.853763	1	The chemical reactions and pathways resulting in the breakdown of pyrimidine nucleoside triphosphate, a compound consisting of a pyrimidine base linked to a ribose or deoxyribose sugar esterified with triphosphate on the sugar	0.671166	0.671166	DCTPP1
GO:0009213	pyrimidine deoxyribonucleoside triphosph...	1	1	0.02	79	0.0237	0.0237	0.853763	1	The chemical reactions and pathways resulting in the breakdown of pyrimidine deoxyribonucleoside triphosphate, a compound consisting of a pyrimidine base linked to a deoxyribose sugar esterified with triphosphate on the sugar	0.671166	0.671166	DCTPP1
GO:0010034	response to acetate	1	1	0.02	80	0.0237	0.0237	0.853763	1	Any process that results in a change in state or activity of a cell or an organism (in terms of movement, secretion, enzyme production, gene expression, etc.) as a result of an acetate stimulus	0.795496	0.795496	CHUK
GO:0014011	Schwann cell proliferation involved in a...	1	1	0.02	81	0.0237	0.0237	0.853763	1	The multiplication or reproduction of Schwann cells by cell division, resulting in the expansion of their population in response to an axonal lesion. The newly generated Schwann cells support subsequent axon regeneration in the peripheral nervous system	1.10585	1.10585	CERS2
GO:0014809	regulation of skeletal muscle contractio...	1	1	0.02	82	0.0237	0.0237	0.853763	1	Any process that modulates the frequency, rate or extent of skeletal muscle contraction via the regulation of the release of sequestered calcium ion by sarcoplasmic reticulum into cytosol. The sarcoplasmic reticulum is the endoplasmic reticulum of striated muscle, specialised for the sequestration of calcium ions that are released upon receipt of a signal relayed by the T tubules from the neuromu…	0.431023	0.431023	GSTO1
GO:0014810	positive regulation of skeletal muscle c...	1	1	0.02	83	0.0237	0.0237	0.853763	1	Any process that activates, maintains or increases the frequency, rate or extent of skeletal muscle contraction via the regulation of the release of sequestered calcium ion by sarcoplasmic reticulum into cytosol. The sarcoplasmic reticulum is the endoplasmic reticulum of striated muscle, specialised for the sequestration of calcium ions that are released upon receipt of a signal relayed by the T …	0.431023	0.431023	GSTO1
GO:0016560	protein import into peroxisome matrix, d...	1	1	0.02	84	0.0237	0.0237	0.853763	1	The process in which a complex formed of a peroxisome targeting sequence (PTS) receptor bound to a PTS-bearing protein docks with translocation machinery in the preoxisomal membrane	0.437198	0.437198	PEX5
GO:0017186	peptidyl-pyroglutamic acid biosynthetic ...	1	1	0.02	85	0.0237	0.0237	0.853763	1	The chemical reactions and pathways resulting in the formation of peptidyl-pyroglutamic acid, catalyzed by glutaminyl-peptide cyclotransferase	0.860484	0.860484	QPCTL
GO:0018199	peptidyl-glutamine modification	1	1	0.02	86	0.0237	0.0237	0.853763	1	The modification of peptidyl-glutamine	0.860484	0.860484	QPCTL
GO:0021541	ammon gyrus development	1	1	0.02	87	0.0237	0.0237	0.853763	1	The process whose specific outcome is the progression of the ammon gyrus over time, from its formation to the mature structure. The ammon gyrus, often subdivided into the CA1 and CA3 regions, is one of the two interlocking gyri of the hippocampus that is rich in large pyramidal neurons	1.44032	1.44032	LRP8
GO:0021684	cerebellar granular layer formation	1	1	0.02	88	0.0237	0.0237	0.853763	1	The process that gives rise to the cerebellar granule layer. This process pertains to the initial formation of a structure from unspecified parts. The granular layer is the innermost layer of the cerebellar cortex. This layer contains densely packed small neurons, mostly granule cells. Some Golgi cells are found at the outer border. Granule neurons send parallel fibers to the upper molecular laye…	0.79084	0.79084	MTPN
GO:0021707	cerebellar granule cell differentiation	1	1	0.02	89	0.0237	0.0237	0.853763	1	The process in which neuroblasts acquire specialized structural and/or functional features that characterize the mature cerebellar granule cell. Differentiation includes the processes involved in commitment of a neuroblast to a granule cell fate. A granule cell is a glutamatergic interneuron found in the cerebellar cortex	0.79084	0.79084	MTPN
GO:0030309	poly-N-acetyllactosamine metabolic proce...	1	1	0.02	90	0.0237	0.0237	0.853763	1	The chemical reactions and pathways involving poly-N-acetyllactosamine, a carbohydrate composed of N-acetyllactosamine repeats (Gal-beta-1,4-GlcNAc-beta-1,3)n	0.482527	0.482527	B4GAT1
GO:0030311	poly-N-acetyllactosamine biosynthetic pr...	1	1	0.02	91	0.0237	0.0237	0.853763	1	The chemical reactions and pathways resulting in the formation of poly-N-acetyllactosamine, a carbohydrate composed of N-acetyllactosamine repeats (Gal-beta-1,4-GlcNAc-beta-1,3)n	0.482527	0.482527	B4GAT1
GO:0034775	glutathione transmembrane transport	1	1	0.02	92	0.0237	0.0237	0.853763	1	A process in which glutathione is transported from one side of a membrane to the other by means of some agent such as a transporter or pore	0.513542	0.513542	ABCC1
GO:0035105	sterol regulatory element binding protei...	1	1	0.02	93	0.0237	0.0237	0.853763	1	The transfer of a sterol regulatory element binding protein (SREBP) into the nucleus, across the nuclear membrane, in response to altered levels of one or more lipids. SREBPs are transcription factors that bind sterol regulatory elements (SREs), DNA motifs found in the promoters of target genes	0.522082	0.522082	LMNA
GO:0035443	tripeptide transmembrane transport	1	1	0.02	94	0.0237	0.0237	0.853763	1	The directed movement of a tripeptide across a membrane by means of some agent such as a transporter or pore. A tripeptide is a compound containing three amino acids linked together by peptide bonds	0.513542	0.513542	ABCC1
GO:0035668	TRAM-dependent toll-like receptor signal...	1	1	0.02	95	0.0237	0.0237	0.853763	1	Any series of molecular signals generated as a consequence of binding to a toll-like receptor where the TRAM adaptor mediates transduction of the signal. Toll-like receptors directly bind pattern motifs from a variety of microbial sources to initiate innate immune response	0.761798	0.761798	PRKCE
GO:0035669	TRAM-dependent toll-like receptor 4 sign...	1	1	0.02	96	0.0237	0.0237	0.853763	1	Any series of molecular signals generated as a consequence of binding to a toll-like receptor 4 where the TRAM adaptor mediates transduction of the signal. Toll-like 4 receptors are pattern recognition receptors that bind bacterial lipopolysaccharide (LPS) to initiate an innate immune response	0.761798	0.761798	PRKCE
GO:0038002	endocrine signaling	1	1	0.02	97	0.0237	0.0237	0.853763	1	The transfer of information from one cell to another, where an endocrine hormone is transported from the signal-producing cell to the receiving cell via the circulatory system (via blood, lymph or cerebrospinal fluid). The signaling cell and the receiving cell are often distant to each other	0.6803	0.6803	KRAS
GO:0039520	induction by virus of host autophagy	1	1	0.02	98	0.0237	0.0237	0.853763	1	Any process in which a virus activates or increases the frequency, rate or extent of autophagy in the host	0.431033	0.431033	EIF2AK4
GO:0042222	interleukin-1 biosynthetic process	1	1	0.02	99	0.0237	0.0237	0.853763	1	The chemical reactions and pathways resulting in the formation of interleukin-1, an interleukin produced mainly by activated macrophages. It is involved in the inflammatory response, and is identified as an endogenous pyrogen	0.69805	0.69805	EGR1
GO:0044501	modulation of signal transduction in oth...	1	1	0.02	100	0.0237	0.0237	0.853763	1	The process in which an organism effects a change in a signal transduction process - a cellular process in which a signal is conveyed to trigger a change in the activity or state of a cell - in a second organism	0.400578	0.400578	TNIP1
GO:0045013	carbon catabolite repression of transcri...	1	1	0.02	101	0.0237	0.0237	0.853763	1	A transcription regulation process in which the presence of one carbon source leads to a decrease in the frequency, rate, or extent of transcription of specific genes involved in the metabolism of other carbon sources. Carbon catabolite repression is a mechanism of genetic regulation which the accumulation of catabolites of one substance in the cell represses the formation of enzymes that contrib…	0.462847	0.462847	CHMP1A
GO:0045014	negative regulation of transcription by ...	1	1	0.02	102	0.0237	0.0237	0.853763	1	Any process involving glucose that stops, prevents or reduces the rate of transcription. The presence of glucose in the growth medium inhibits the synthesis of certain enzymes in bacteria growing on the medium. For example, transcription of some catabolic operons is under negative control by specific repressors and glucose is an anti-inducer of xylose utilization and glycerol kinase	0.462847	0.462847	CHMP1A
GO:0045360	regulation of interleukin-1 biosynthetic...	1	1	0.02	103	0.0237	0.0237	0.853763	1	Any process that modulates the frequency, rate or extent of the chemical reactions and pathways resulting in the formation of interleukin-1	0.69805	0.69805	EGR1
GO:0045362	positive regulation of interleukin-1 bio...	1	1	0.02	104	0.0237	0.0237	0.853763	1	Any process that activates or increases the frequency, rate or extent of the chemical reactions and pathways resulting in the formation of interleukin-1	0.69805	0.69805	EGR1
GO:0046065	dCTP metabolic process	1	1	0.02	105	0.0237	0.0237	0.853763	1	The chemical reactions and pathways involving dCTP, deoxycytidine triphosphate	0.671166	0.671166	DCTPP1
GO:0050720	interleukin-1 beta biosynthetic process	1	1	0.02	106	0.0237	0.0237	0.853763	1	The chemical reactions and pathways resulting in the formation of interleukin-1 beta	0.69805	0.69805	EGR1
GO:0050722	regulation of interleukin-1 beta biosynt...	1	1	0.02	107	0.0237	0.0237	0.853763	1	Any process that modulates the frequency, rate or extent of the chemical reactions and pathways resulting in the formation of interleukin-1 beta	0.69805	0.69805	EGR1
GO:0050725	positive regulation of interleukin-1 bet...	1	1	0.02	108	0.0237	0.0237	0.853763	1	Any process that activates or increases the frequency, rate or extent of the chemical reactions and pathways resulting in the formation of interleukin-1 beta	0.69805	0.69805	EGR1
GO:0052027	modulation by symbiont of host signal tr...	1	1	0.02	109	0.0237	0.0237	0.853763	1	Any process in which an organism modulates the frequency, rate or extent of the host signal transduction pathways, the cascade of processes by which a signal interacts with a receptor. The host is defined as the larger of the organisms involved in a symbiotic interaction	0.400578	0.400578	TNIP1
GO:0052250	modulation of signal transduction in oth...	1	1	0.02	110	0.0237	0.0237	0.853763	1	Any process in which an organism modulates the frequency, rate or extent of the signal transduction pathways, the cascade of processes by which a signal interacts with a receptor, occurring in a second organism, where the two organisms are in a symbiotic interaction	0.400578	0.400578	TNIP1
GO:0060112	generation of ovulation cycle rhythm	1	1	0.02	111	0.0237	0.0237	0.853763	1	The process which controls the timing of the type of sexual cycle seen in female mammals	0.6235	0.6235	KISS1
GO:0060741	prostate gland stromal morphogenesis	1	1	0.02	112	0.0237	0.0237	0.853763	1	The process in which the prostate gland stroma is generated and organized. The prostate gland stroma is made up of the mesenchymal or fibroblast cells of the prostate gland	1.2106	1.2106	AL928654.3
GO:0070510	regulation of histone H4-K20 methylation	1	1	0.02	113	0.0237	0.0237	0.853763	1	Any process that modulates the frequency, rate or extent of the covalent addition of a methyl group to the lysine at position 20 of histone H4	0.728544	0.728544	BRCA1
GO:0070512	positive regulation of histone H4-K20 me...	1	1	0.02	114	0.0237	0.0237	0.853763	1	Any process that activates or increases the frequency, rate or extent of the covalent addition of a methyl group to the lysine at position 20 of histone H4	0.728544	0.728544	BRCA1
GO:0071042	nuclear polyadenylation-dependent mRNA c...	1	1	0.02	115	0.0237	0.0237	0.853763	1	The chemical reactions and pathways occurring in the nucleus and resulting in the breakdown of a messenger RNA (mRNA) molecule, initiated by the enzymatic addition of a sequence of adenylyl residues (polyadenylation) at the 3' end the target mRNA	0.885447	0.885447	PNPT1
GO:0071047	polyadenylation-dependent mRNA catabolic...	1	1	0.02	116	0.0237	0.0237	0.853763	1	The chemical reactions and pathways resulting in the breakdown of a messenger RNA (mRNA) molecule, initiated by the enzymatic addition of a sequence of adenylyl residues (polyadenylation) at the 3' end the target mRNA	0.885447	0.885447	PNPT1
GO:0071505	response to mycophenolic acid	1	1	0.02	117	0.0237	0.0237	0.853763	1	Any process that results in a change in state or activity of a cell or an organism (in terms of movement, secretion, enzyme production, gene expression, etc.) as a result of a mycophenolic acid stimulus	0.69805	0.69805	EGR1
GO:0071506	cellular response to mycophenolic acid	1	1	0.02	118	0.0237	0.0237	0.853763	1	Any process that results in a change in state or activity of a cell (in terms of movement, secretion, enzyme production, gene expression, etc.) as a result of a mycophenolic acid stimulus	0.69805	0.69805	EGR1
GO:0072298	regulation of metanephric glomerulus dev...	1	1	0.02	119	0.0237	0.0237	0.853763	1	Any process that modulates the rate, frequency or extent of metanephric glomerulus development, the progression of the metanephric glomerulus over time from its initial formation until its mature state. The metanephric glomerulus is a capillary tuft surrounded by Bowman's capsule in nephrons of the vertebrate kidney, or metanephros	0.69805	0.69805	EGR1
GO:0072300	positive regulation of metanephric glome...	1	1	0.02	120	0.0237	0.0237	0.853763	1	Any process that increases the rate, frequency or extent of metanephric glomerulus development, the progression of the metanephric glomerulus over time from its initial formation until its mature state. The metanephric glomerulus is a capillary tuft surrounded by Bowman's capsule in nephrons of the vertebrate kidney, or metanephros	0.69805	0.69805	EGR1
GO:0072301	regulation of metanephric glomerular mes...	1	1	0.02	121	0.0237	0.0237	0.853763	1	Any process that modulates the frequency, rate or extent of metanephric glomerular mesangial cell proliferation	0.69805	0.69805	EGR1
GO:0072303	positive regulation of glomerular metane...	1	1	0.02	122	0.0237	0.0237	0.853763	1	Any process that increases the frequency, rate or extent of metanephric glomerular mesangial cell proliferation	0.69805	0.69805	EGR1
GO:0072641	type I interferon secretion	1	1	0.02	123	0.0237	0.0237	0.853763	1	The regulated release of type I interferon from a cell	0.795496	0.795496	CHUK
GO:0072642	interferon-alpha secretion	1	1	0.02	124	0.0237	0.0237	0.853763	1	The regulated release of interferon-alpha from a cell	0.795496	0.795496	CHUK
GO:0072714	response to selenite ion	1	1	0.02	125	0.0237	0.0237	0.853763	1	Any process that results in a change in state or activity of a cell or an organism (in terms of movement, secretion, enzyme production, gene expression, etc.) as a result of a selenite ion stimulus	0.368766	0.368766
GO:0072715	cellular response to selenite ion	1	1	0.02	126	0.0237	0.0237	0.853763	1	Any process that results in a change in state or activity of a cell (in terms of movement, secretion, enzyme production, gene expression, etc.) as a result of a selenite ion stimulus	0.368766	0.368766
GO:0085032	modulation by symbiont of host I-kappaB ...	1	1	0.02	127	0.0237	0.0237	0.853763	1	Any process in which an organism modulates the frequency, rate or extent of host NF-kappaB-mediated signal transduction pathways during the host defense response. The host is defined as the larger of the organisms involved in a symbiotic interaction	0.400578	0.400578	TNIP1
GO:0090615	mitochondrial mRNA processing	1	1	0.02	128	0.0237	0.0237	0.853763	1	Steps involved in processing precursor RNAs arising from transcription of operons in the mitochondrial genome into mature mRNAs	0.885447	0.885447	PNPT1
GO:0090616	mitochondrial mRNA 3'-end processing	1	1	0.02	129	0.0237	0.0237	0.853763	1	Any process involved in forming the mature 3' end of an mRNA molecule that derives from the mitochondrial genome	0.885447	0.885447	PNPT1
GO:0097222	mitochondrial mRNA polyadenylation	1	1	0.02	130	0.0237	0.0237	0.853763	1	The enzymatic addition of a sequence of 40-60 adenylyl residues at the 3' end of a eukaryotic mitochondrial mRNA primary transcript. Mitochondria contain both stabilizing and destabilizing poly(A) tails	0.885447	0.885447	PNPT1
GO:0098758	response to interleukin-8	1	1	0.02	131	0.0237	0.0237	0.853763	1		0.69805	0.69805	EGR1
GO:0098759	cellular response to interleukin-8	1	1	0.02	132	0.0237	0.0237	0.853763	1		0.69805	0.69805	EGR1
GO:0098989	NMDA selective glutamate receptor signal...	1	1	0.02	133	0.0237	0.0237	0.853763	1		0.875728	0.875728	TIAM1
GO:1900148	negative regulation of Schwann cell migr...	1	1	0.02	134	0.0237	0.0237	0.853763	1	Any process that stops, prevents or reduces the frequency, rate or extent of Schwann cell migration	1.10585	1.10585	CERS2
GO:1900149	positive regulation of Schwann cell migr...	1	1	0.02	135	0.0237	0.0237	0.853763	1	Any process that activates or increases the frequency, rate or extent of Schwann cell migration	0.875728	0.875728	TIAM1
GO:1902178	fibroblast growth factor receptor apopto...	1	1	0.02	136	0.0237	0.0237	0.853763	1	An apoptotic signaling pathway that starts with a ligand binding to, or being withdrawn from, a fibroblast growth factor receptor (FGFR)	1.1457	1.1457	FGFR3
GO:1902296	DNA strand elongation involved in cell c...	1	1	0.02	137	0.0237	0.0237	0.853763	1	Any DNA strand elongation that is involved in cell cycle DNA replication	0.649254	0.649254	GINS1
GO:1902319	DNA strand elongation involved in nuclea...	1	1	0.02	138	0.0237	0.0237	0.853763	1	Any DNA strand elongation that is involved in nuclear cell cycle DNA replication	0.649254	0.649254	GINS1
GO:1902739	regulation of interferon-alpha secretion	1	1	0.02	139	0.0237	0.0237	0.853763	1	Any process that modulates the frequency, rate or extent of interferon-alpha secretion	0.795496	0.795496	CHUK
GO:1902741	positive regulation of interferon-alpha ...	1	1	0.02	140	0.0237	0.0237	0.853763	1	Any process that activates or increases the frequency, rate or extent of interferon-alpha secretion	0.795496	0.795496	CHUK
GO:1902983	DNA strand elongation involved in mitoti...	1	1	0.02	141	0.0237	0.0237	0.853763	1	Any DNA strand elongation involved in mitotic cell cycle DNA replication	0.649254	0.649254	GINS1
GO:1904266	regulation of Schwann cell chemotaxis	1	1	0.02	142	0.0237	0.0237	0.853763	1		0.875728	0.875728	TIAM1
GO:1904268	positive regulation of Schwann cell chem...	1	1	0.02	143	0.0237	0.0237	0.853763	1		0.875728	0.875728	TIAM1
GO:1904570	negative regulation of selenocysteine in...	1	1	0.02	144	0.0237	0.0237	0.853763	1		0.368766	0.368766
GO:1904572	negative regulation of mRNA binding	1	1	0.02	145	0.0237	0.0237	0.853763	1		0.368766	0.368766
GO:1904573	regulation of selenocysteine insertion s...	1	1	0.02	146	0.0237	0.0237	0.853763	1		0.368766	0.368766
GO:1904574	negative regulation of selenocysteine in...	1	1	0.02	147	0.0237	0.0237	0.853763	1		0.368766	0.368766
GO:1905044	regulation of Schwann cell proliferation...	1	1	0.02	148	0.0237	0.0237	0.853763	1		1.10585	1.10585	CERS2
GO:1905045	negative regulation of Schwann cell prol...	1	1	0.02	149	0.0237	0.0237	0.853763	1		1.10585	1.10585	CERS2
GO:1905089	regulation of parkin-mediated stimulatio...	1	1	0.02	150	0.0237	0.0237	0.853763	1		0.996852	0.996852	VPS13C
GO:1905090	negative regulation of parkin-mediated s...	1	1	0.02	151	0.0237	0.0237	0.853763	1		0.996852	0.996852	VPS13C
GO:1905215	negative regulation of RNA binding	1	1	0.02	152	0.0237	0.0237	0.853763	1		0.368766	0.368766
GO:1905274	regulation of modification of postsynapt...	1	1	0.02	153	0.0237	0.0237	0.853763	1		0.875728	0.875728	TIAM1
GO:1990751	Schwann cell chemotaxis	1	1	0.02	154	0.0237	0.0237	0.853763	1		0.875728	0.875728	TIAM1
GO:2000620	positive regulation of histone H4-K16 ac...	1	1	0.02	155	0.0237	0.0237	0.853763	1	Any process that activates or increases the frequency, rate or extent of histone H4-K16 acetylation	0.728544	0.728544	BRCA1
GO:2001029	regulation of cellular glucuronidation	1	1	0.02	156	0.0237	0.0237	0.853763	1	Any process that modulates the frequency, rate or extent of cellular glucuronidation	0.761798	0.761798	PRKCE
GO:2001031	positive regulation of cellular glucuron...	1	1	0.02	157	0.0237	0.0237	0.853763	1	Any process that activates or increases the frequency, rate or extent of cellular glucuronidation	0.761798	0.761798	PRKCE
GO:0046488	phosphatidylinositol metabolic process	120	7	2.84	158	0.02374	0.02374	0.853763	1	The chemical reactions and pathways involving phosphatidylinositol, any glycophospholipid in which a sn-glycerol 3-phosphate residue is esterified to the 1-hydroxyl group of 1D-myo-inositol	0.846828	-0.758457	FAM126A, INPP4B, FGFR3, PI4K2B, MTMR1, BPNT1, EFR3A, PI4K2A, PIGW, IRS1, PDGFRB	PIK3R1, SYNJ2, PDGFRA, EGFR, PLEKHA2, PIGC, PTPN13, DPM1, INPP4A, PIGP, PIK3CB, PIGU, IMPAD1, MET, IMPA1, PIGS
GO:1901576	organic substance biosynthetic process	3779	104	89.56	2645	0.02382	0.66596	0.853763	1	The chemical reactions and pathways resulting in the formation of an organic substance, any molecular entity containing carbon	1.20565	-1.73461	LRP8, KLF6, KAT6A, FOSL2, RNF6, INPP4B, FGFR3, SKIL, KLF12, CERS2, ZNF326, PSMA6, POLR3K, GTF2A1, GPC2, NPAT, EGLN2, H3F3A, HES4, ZNF623, ZBTB3, PPP1R3D, C1D, SOD2, HOXC13, CNPY2, CARD9, MEX3D, ZNF160, LPGAT1, TOB2, ZBTB18, ZNF770, CDC40, CDYL, GTF2H3, ADSS, ZBTB8A, DSCC1, PI4K2B, POFUT1, ARHGAP35, SMAD5, MBOAT2, CREBZF, ZNF197, RXRB, SECISBP2L, TAF9B, ZNF618, PRKAA1, ZFP64, KLF16, CHUK, MTPN, AT…	ZNF83, FAM220A, ZNF17, PSMD5, EXTL2, POLE2, ZNF675, ZNF480, ELOVL7, HAT1, SLU7, PPCS, PPT1, THRB, UBE2D3, ATP5F1EP2, TERF2IP, RPL39, MRPS30, DVL3, EPC1, EIF3M, ZNF75A, SUPT3H, GSPT1, UGP2, RNF2, LINC02210-CRHR1, SLTM, RBM39, UCHL5, PSMD12, EIF3E, HIGD1A, NFE2L2, MIER3, ZNF625, MED21, YEATS4, INTS8, AZIN1, CREB1, SIN3A, ZKSCAN8, DMTF1, GPD2, PHF10, PAIP1, MTERF2, AASDH, E2F5, TAF5, PIK3R1, RHOQ, I…
GO:0010557	positive regulation of macromolecule bio...	983	33	23.3	2289	0.02404	0.53105	0.858571	1	Any process that increases the rate, frequency or extent of the chemical reactions and pathways resulting in the formation of a macromolecule, any molecule of high relative molecular mass, the structure of which essentially comprises the multiple repetition of units derived, actually or conceptually, from molecules of low relative molecular mass	1.07635	-1.31044	KLF6, KAT6A, FOSL2, RNF6, KLF12, NPAT, HOXC13, CNPY2, DSCC1, SMAD5, RXRB, TAF9B, CHUK, MTPN, ATXN7, CYR61, AHR, TAF4, CDK9, NCOA3, UBC, MC1R, PXYLP1, CHD6, BRCA1, RTF1, TAF8, CDK8, CCNK, EGR1, SMAD4, DNA2, SERP1, KPNA6, ATOH8, LARP4, MECP2, ZNF593, TEF, MEF2D, KAT6B, GSK3B, LGR4, POMT2, THRA, SUPT6H, RNF10, TGFBR1, NR1D2, GATA2, TAF15, FOXO3, FOXM1, TOP2A, CDK1, WRAP53, DNAJC3, CASK, NLRP3, UQCC2…	THRB, DVL3, EPC1, SUPT3H, EIF3E, NFE2L2, MED21, YEATS4, CREB1, SIN3A, PAIP1, E2F5, PIK3R1, RHOQ, MAP2K4, GTF2B, MBTPS2, PCNA, HSP90AA1, IRF2, SPP1, PTGES3, KDM5A, STAT1, AKIRIN2, ANKRD49, ZNF567, LUM, RLF, GLIS3, IFT74, IKZF4, NCK1, WDR75, FAM129A, EIF2A, NCOA4, NPM1, TAF9, MED4, PSMC6, TCF12, NAMPT, PDGFRA, TOPORS, GTF2F2, DHX36, PIAS2, HSPH1, MKL2, ARID4B, HEATR1, PCGF5, MNAT1, YWHAH, NFYB, UBE…
GO:1902531	regulation of intracellular signal trans...	984	33	23.32	2077	0.02435	0.46847	0.866548	1	Any process that modulates the frequency, rate or extent of intracellular signal transduction	1.04343	-1.4652	KAT6A, FGFR3, SKIL, ARHGAP18, KIF14, SOD2, SH3RF1, CARD9, SOCS7, ADAM9, ARHGAP35, TIAM1, TAF9B, PRKAA1, CHUK, CYR61, PDE8A, TAF4, EPS8L1, PRKCE, FIGNL1, SOCS4, NDFIP2, UBC, MC1R, RPA3, TRIO, BRCA1, RCAN3, SHOC2, MYO5A, RMI1, RASSF2, IGFBP5, SMAD4, DNA2, KRAS, LAMTOR4, TRIM5, AKAP13, PLXNB1, RC3H2, MDM4, OSBPL8, KISS1, CDH2, S100A4, VAV2, GSK3B, RHOBTB2, PREX1, FNIP1, CBL, DUSP10, MADD, DENND1A, T…	ITGB1, ATP2C1, ZNF675, TERF2IP, DVL3, NRK, NOV, NFE2L2, PDCD10, HPSE, TAF5, PIK3R1, RHOQ, MAP2K4, DYRK1A, ZMYND11, VRK2, LYN, RASGRF1, STAT1, EIF2AK2, DNM1L, RASA1, ARHGAP5, UBE2N, CSNK2A2, RTN4, NCK1, TAF9, TRIM13, GPRC5B, PUM2, COL3A1, EEF1E1, PRNP, PDGFRA, ATP6AP2, TOPBP1, SDCBP, HSPH1, TAB2, CALM2, PPP2R5C, DEPDC7, DNMBP, OPHN1, ARL6IP5, PRKAB2, MEAF6, ZFAND6, UBE3A, RFC4, IVNS1ABP, EGFR, AID…
GO:0007568	aging	177	9	4.19	1269	0.02478	0.26747	0.878521	1	A developmental process that is a deterioration and loss of function over time. Aging includes loss of functions such as resistance to disease, homeostasis, and fertility, as well as wear and tear. Aging includes cellular senescence, but is more inclusive. May precede death (GO:0016265) and may succeed developmental maturation (GO:0021700)	0.785106	-1.00419	KAT6A, SOD2, PNPT1, SLC12A2, TBX2, IGFBP5, KRAS, SERP1, FOXO3, FOXM1, CDK1, OPA1, ROMO1, LMNA, TBX3, AMFR, CHEK2, TSPO, HMGCR, CTSV, JUN, BRCA2, EDN1, BAK1, PDGFRB, TGFB1, HRAS, MAP2K1	NFE2L2, SMC6, CREB1, SIN3A, MSH2, ERO1A, NPM1, COL3A1, EEF1E1, MSH6, ATP2B1, SRR, CASP2, RPS6KB1, CDK6, ID2, SERPINF1, NUAK1, HMGA2, OGG1, GNAO1, BECN1
GO:0044238	primary metabolic process	5942	154	140.82	1931	0.02494	0.43283	0.878521	1	The chemical reactions and pathways involving those compounds which are formed as a part of the normal anabolic and catabolic processes. These processes take place in most, if not all, cells of the organism	1.38062	-1.74748	SPNS2, FAM126A, ADAMTS1, LRP8, KLF6, KAT6A, UNKL, FOSL2, RNF6, INPP4B, SKP2, FGFR3, SKIL, KLF12, CERS2, PHC1, ZNF326, PSMA6, POLR3K, GTF2A1, KIF14, GPC2, NPAT, EGLN2, H3F3A, HES4, ZNF623, IPPK, ZBTB3, PPP1R3D, C1D, SLC25A32, EXOSC6, SSH2, OSGEP, DNAJC6, PPP4R2, SOD2, SH3RF1, HOXC13, CNPY2, CARD9, MEX3D, SOCS7, ZNF160, LPGAT1, TOB2, ZBTB18, ZNF770, TRUB1, CDC40, CDYL, ADAM9, SH3RF2, GTF2H3, ADSS, …	ZNF83, FAM220A, ZNF17, PSMD5, CETN2, EXTL2, POLE2, ZNF675, ZNF480, ELOVL7, HAT1, SLU7, OMA1, ASB3, PPCS, PPT1, THRB, UBE2D3, ATP5F1EP2, TERF2IP, RPL39, MRPS30, ARRDC3, DVL3, LYPLA1, EPC1, MTREX, EIF3M, ZNF75A, PLPP5, SUPT3H, GSPT1, UGP2, RNASEH2B, RNF2, LINC02210-CRHR1, SLTM, RBM39, SNRK, NRK, RBMXL1, UCHL5, PSMD12, USP25, COL11A1, EIF3E, BCAS2, HIGD1A, NFE2L2, DHX15, SMC6, MIER3, PDCD10, TENT2, …
GO:1902679	negative regulation of RNA biosynthetic ...	700	25	16.59	160	0.02495	0.02495	0.878521	1	Any process that stops, prevents or reduces the frequency, rate or extent of RNA biosynthetic process	1.07575	-1.43848	LRP8, KAT6A, SKIL, KLF12, NPAT, H3F3A, C1D, TOB2, ZBTB18, CDYL, ARHGAP35, CREBZF, TAF9B, KLF16, AHR, HMG20A, HES6, UBC, BAHD1, CCAR1, BRCA1, GFI1, TBX2, GON4L, RTF1, EGR1, SMAD4, PPM1F, ATOH8, MECP2, CBX6, MDM4, SUV39H2, KAT6B, TSC22D3, LGR4, SUFU, THRA, SCMH1, SUPT6H, TNRC18, JARID2, FNIP1, SBNO2, ZHX2, MPHOSPH8, NKX3-2, NR1D2, GATA2, FOXO3, FOXM1, FLCN, RPL10, ZNF703, MAGED1, ZFHX3, POU2F1, FAM…	FAM220A, ZNF675, HAT1, THRB, UBE2D3, EPC1, RNF2, CREB1, SIN3A, ZMYND11, ZNF224, ZBTB1, BAZ2A, IRF2, NFIL3, KDM5A, STAT1, AKIRIN2, ZNF567, BTAF1, EED, COPS2, GLIS3, IKZF4, NCK1, SMURF2, UBA3, SUMO1, RBAK, ZBTB33, TRIM13, ZNF85, AEBP2, BASP1, NR2C1, WWP1, STRAP, CHCHD3, NKX3-1, NFE2L3, DR1, DDX5, ZBTB38, MTERF3, ZNF189, CGGBP1, TFAP2A, ZNF93, BPTF, NR2F1, GREM1, SET, ISL1, USP47, HIST1H2AC, GPS2, R…
GO:0010769	regulation of cell morphogenesis involve...	149	8	3.53	161	0.02518	0.02518	0.883509	1	Any process that modulates the frequency, rate or extent of cell morphogenesis contributing to cell differentiation. Cell morphogenesis involved in differentiation is the change in form (cell shape and size) that occurs when relatively unspecialized cells acquire specialized structural and/or functional features that characterize the cells, tissues, or organs of the mature organism or some other …	0.923647	-0.820563	LRP8, RNF6, SKIL, SSH2, ARHGAP35, TIAM1, DOCK1, TRPV2, PLXNB1, GSK3B, PREX1, FBXO31, SEMA7A, OPA1, ANAPC2, CTTN, ACTR2, CRKL, ARHGAP44, DOCK5, EFNA1, MAPT, GORASP1, MAP2K1	ADNP, SPP1, DNM1L, RTN4, RAB11A, CAPRIN1, YWHAH, FGF13, SS18L1, RAPGEF2, HAS2, CYFIP1, RUFY3, ROBO1, ANKRD27, WNT5A, FBXW8, CHN1
[truncated: 169 more rows]

## Sheet: top 500 upreg
GO id	Term	Genes in genome (background)	Genes in top-500 upreg	Expected genes in top-500 upreg	Rank in P.Fisher.elim	P.Fisher	P.Fisher.elim	FDR.Fisher	FDR.Fisher.elim	Description	Avg.LogFC for top-10 upreg	Avg.LogFC for top-10 downreg	Upreg genes (LogFC > 0.4)	Downreg genes (LogFC < -0.4)
GO:0070972	protein localization to endoplasmic reti...	121	20	5.82	838	1.1e-06	0.13996	0.0034	1	A process in which a protein is transported to, or maintained in, a location within the endoplasmic reticulum	0.614268	-0.924961	RPSA, RPL31, RPS10, RPS21, RPS19, RPL41, RPL21, RPS29, RPS8, RPL10, RPS12, RPL35A, RPL37A, RPS27A, UBAC2, RPS23, RPL34, RAB3GAP2, HSPA5, RPLP2, KDELR2, RAB3GAP1	SRP19, RPL39, RPL15, KDELR3, RTN4, VAPA, RPL36A, SRP72, SRP54, SRP14, RAB10, SPCS2, RPL17-C18orf32, RPL17, RPL9, SRP9
[truncated: 471 more rows]

## Sheet: top 1000 upreg
GO id	Term	Genes in genome (background)	Genes in top-1000 upreg	Expected genes in top-1000 upreg	Rank in P.Fisher.elim	P.Fisher	P.Fisher.elim	FDR.Fisher	FDR.Fisher.elim	Description	Avg.LogFC for top-10 upreg	Avg.LogFC for top-10 downreg	Upreg genes (LogFC > 0.4)	Downreg genes (LogFC < -0.4)
[truncated: 310 more rows]

[truncated: 5 more sheets: top 40 downreg, top 80 downreg, top 250 downreg, top 500 downreg, top 1000 downreg]
