# Supplementary material for: Effects of Siberian fir terpenes extract Abisil on antioxidant activity, autophagy, transcriptome and proteome of human fibroblasts
Source: Aging (Albany NY). 2021 Aug 24;13(16):20050–80. doi: 10.18632/aging.203448 (PMC8436938; doi:10.18632/aging.203448)
Supplement: Supplementary Table 9 [file aging-13-203448-s010.xlsx]

## Sheet: mitophagy-assoc.
Gene ID	Gene	Biotype	Name	RefSeq_Summary	Annotation			Control			5 μg/ml				50 μg/ml				0	0.5	1	Score	LogCPM rank (%)	Tr.Length rank (%)	LogFC	LogCPM	F	p (QLF test)	FDR (QLF test)	p (LR test)	p (Krusk-W.)	FDR (Krusk-W.)	Spear- man r	Pearson r	p (Spearman)	p (Pearson)	CPMs:	4848k1	4848k3	4446b1	4446b2	4446b3	4848a1	4848a2	4848a3
Abysil overview								0	0		1	1	1		2	2	2																					0	0	1	1	1	2	2	2
Hi vs Low								-0.25	-0.25		0	0	0		1	1	1																							0	0	0	1	1	1
Hi vs Cnt								0	0		-0.25	-0.25	-0.25		1	1	1																					0	0				1	1	1
ENSG00000150991	UBC	PC	ubiquitin C	This gene represents a ubiquitin gene, ubiquitin C. The encoded protein is a polyubiquitin precursor. Conjugation of ubiquitin monomers or polymers can lead to various effects within a cell, depending on the residues to which ubiquitin is conjugated. Ubiquitination has been associated with protein degradation, DNA repair, cell cycle regulation, kinase modification, endocytosis, and regulation of …	hsa03320 (PPAR signaling pathway), GO:0000086 (G2/M transition of mitotic cell cycle), GO:0000122 (negative regulation of transcription from RNA polymerase II promoter), GO:0000165 (MAPK cascade), GO:0000187 (activation of MAPK activity), GO:0000209 (protein polyubiquitination), GO:0000715 (nucleotide-excision repair, DNA damage recognition), GO:0000717 (nucleotide-excision repair, DNA duplex unw…			-0.551006	-0.525438		0.147877	0.0816808	0.115739		0.355765	0.278727	0.0966557					247.798	96.939	24.1288	0.74495	8.68975	27.1291	0.000237603	0.0221456	5.45825e-06	0.0956344	0.23887	0.793725	0.901982	0.0186875	0.00218457		274.511	279.455	446.845	426.716	436.957	516.414	489.458	431.189
ENSG00000213281	NRAS	PC	NRAS proto-oncogene, GTPase	This is an N-ras oncogene encoding a membrane protein that shuttles between the Golgi apparatus and the plasma membrane. This shuttling is regulated through palmitoylation and depalmitoylation by the ZDHHC9-GOLGA7 complex. The encoded protein, which has intrinsic GTPase activity, is activated by a guanine nucleotide-exchange factor and inactivated by a GTPase activating protein. Mutations in this…	hsa01521 (EGFR tyrosine kinase inhibitor resistance), hsa01522 (Endocrine resistance), hsa04010 (MAPK signaling pathway), hsa04012 (ErbB signaling pathway), hsa04014 (Ras signaling pathway), hsa04015 (Rap1 signaling pathway), hsa04062 (Chemokine signaling pathway), hsa04068 (FoxO signaling pathway), hsa04071 (Sphingolipid signaling pathway), hsa04072 (Phospholipase D signaling pathway), hsa04137 …			-0.268675	-0.264833		-0.132918	-0.241993	-0.208396		0.678448	0.289114	0.149254					193.132	72.7858	97.1592	0.723161	5.72394	16.4238	0.00168529	0.0489857	0.000279458	0.0439369	0.23887	0.944911	0.778152	0.000400878	0.0229563		42.1419	42.2596	46.4973	42.9659	44.0253	83.1066	62.9774	56.9739
ENSG00000070770	CSNK2A2	PC	casein kinase 2 alpha 2		hsa03008 (Ribosome biogenesis in eukaryotes), hsa04064 (NF-kappa B signaling pathway), hsa04137 (Mitophagy - animal), hsa04310 (Wnt signaling pathway), hsa04520 (Adherens junction), hsa05162 (Measles), hsa05168 (Herpes simplex infection), GO:0006351 (transcription, DNA-templated), GO:0006355 (regulation of transcription, DNA-templated), GO:0006457 (protein folding), GO:0006468 (protein phosphoryl…			0.970111	0.409727		-0.222553	-0.0664306	-0.289342		-0.0881729	-0.264374	-0.448964					186.059	75.0088	64.3405	-0.957615	5.88203	19.0809	0.000970459	0.0390112	4.54926e-05	0.119433	0.23887	-0.718132	-0.770238	0.0448173	0.0253379		111.005	74.6311	47.439	53.0893	45.2024	52.2653	46.0264	40.2584
ENSG00000196683	TOMM7	PC	translocase of outer mitochondrial membrane 7	This gene encodes a subunit of the translocase of the outer mitochondrial membrane. The encoded protein regulates the assembly and stability of the translocase complex. [provided by RefSeq, Oct 2012].	hsa04137 (Mitophagy - animal), GO:0006626 (protein targeting to mitochondrion), GO:0016236 (macroautophagy), GO:0030150 (protein import into mitochondrial matrix), GO:0031647 (regulation of protein stability), GO:0045040 (protein import into mitochondrial outer membrane), GO:0098779 (NA), GO:1903955 (NA), GO:0005739 (mitochondrion), GO:0005741 (mitochondrial outer membrane), GO:0005742 (mitochond…			-0.126987	-0.482958		-0.0119796	-0.107889	0.0764326		0.441869	0.137359	0.0741541					167.062	93.1634	4.43758	0.522573	7.73842	14.0458	0.0029026	0.0603741	0.00108691	0.0685251	0.23887	0.869318	0.807064	0.00504681	0.015457		192.346	149.851	208.473	194.936	221.774	286.282	231.427	221.421
ENSG00000173039	RELA	PC	RELA proto-oncogene, NF-kB subunit	NF-kappa-B is a ubiquitous transcription factor involved in several biological processes. It is held in the cytoplasm in an inactive state by specific inhibitors. Upon degradation of the inhibitor, NF-kappa-B moves to the nucleus and activates transcription of specific genes. NF-kappa-B is composed of NFKB1 or NFKB2 bound to either REL, RELA, or RELB. The most abundant form of NF-kappa-B is NFKB1…	hsa01523 (Antifolate resistance), hsa04010 (MAPK signaling pathway), hsa04014 (Ras signaling pathway), hsa04024 (cAMP signaling pathway), hsa04062 (Chemokine signaling pathway), hsa04064 (NF-kappa B signaling pathway), hsa04066 (HIF-1 signaling pathway), hsa04071 (Sphingolipid signaling pathway), hsa04137 (Mitophagy - animal), hsa04151 (PI3K-Akt signaling pathway), hsa04210 (Apoptosis), hsa04211 …			-0.189574	-0.314246		-0.00136875	0.0783813	0.0324823		0.142726	0.0920656	0.159534					164.573	90.8963	32.7922	0.371234	7.34825	12.881	0.00386588	0.0664879	0.0041656	0.0439369	0.23887	0.944911	0.928356	0.000400878	0.000870648		141.611	129.722	161.622	170.922	165.507	178.809	172.57	180.927
ENSG00000143947	RPS27A	PC	ribosomal protein S27a	Ubiquitin, a highly conserved protein that has a major role in targeting cellular proteins for degradation by the 26S proteosome, is synthesized as a precursor protein consisting of either polyubiquitin chains or a single ubiquitin fused to an unrelated protein. This gene encodes a fusion protein consisting of ubiquitin at the N terminus and ribosomal protein S27a at the C terminus. When expresse…	hsa03010 (Ribosome), GO:0000086 (G2/M transition of mitotic cell cycle), GO:0000122 (negative regulation of transcription from RNA polymerase II promoter), GO:0000165 (MAPK cascade), GO:0000184 (nuclear-transcribed mRNA catabolic process, nonsense-mediated decay), GO:0000187 (activation of MAPK activity), GO:0000209 (protein polyubiquitination), GO:0000715 (nucleotide-excision repair, DNA damage …			-0.0550621	-0.434832		0.0120273	-0.141194	-0.03786		0.379651	0.0629352	0.214334					161.117	98.8444	9.09572	0.465891	9.93456	13.1454	0.00361775	0.0651419	0.00176273	0.0621765	0.23887	0.881917	0.810275	0.00376031	0.014736		930.299	714.528	974.678	876.268	941.482	1258.13	1009.76	1121.7
ENSG00000247077	PGAM5	PC	PGAM family member 5, mitochondrial serine/threonine protein phosphatase		hsa04137 (Mitophagy - animal), hsa04217 (Necroptosis), hsa04668 (TNF signaling pathway), GO:0006470 (protein dephosphorylation), GO:0007165 (signal transduction), GO:0043547 (positive regulation of GTPase activity), GO:0070266 (necroptotic process), GO:0005739 (mitochondrion), GO:0005741 (mitochondrial outer membrane), GO:0016021 (integral component of membrane), GO:0005096 (GTPase activator acti…			-0.346596	-0.449697		0.0734318	0.131733	-0.125612		0.421902	0.274428	0.0204107					157.94	49.603	63.6524	0.692133	4.34591	13.8196	0.00306524	0.0618186	0.00130023	0.0956344	0.23887	0.793725	0.858961	0.0186875	0.00629288		15.0675	13.8903	20.8355	21.7772	17.8926	27.0744	24.2492	20.0115
ENSG00000069509	FUNDC1	PC	FUN14 domain containing 1	This gene encodes a protein with a FUN14 superfamily domain. The function of the encoded protein is not known. [provided by RefSeq, Sep 2011].	hsa04137 (Mitophagy - animal), GO:0000422 (mitochondrion degradation), GO:0001666 (response to hypoxia), GO:0010243 (response to organonitrogen compound), GO:0005741 (mitochondrial outer membrane), GO:0031307 (integral component of mitochondrial outer membrane), GO:0005515 (protein binding)			0.800162	0.395764		-0.116805	-0.387944	-0.0721039		-0.316682	-0.0918004	-0.210591					149.602	64.2025	32.0953	-0.810458	5.17429	14.9424	0.00235011	0.0546845	0.000384142	0.133469	0.23887	-0.64254	-0.772048	0.085764	0.0247805		61.5648	46.0264	31.6653	25.8972	32.7247	27.3098	32.2538	29.5464
ENSG00000133703	KRAS	PC	KRAS proto-oncogene, GTPase	This gene, a Kirsten ras oncogene homolog from the mammalian ras gene family, encodes a protein that is a member of the small GTPase superfamily. A single amino acid substitution is responsible for an activating mutation. The transforming protein that results is implicated in various malignancies, including lung adenocarcinoma, mucinous adenoma, ductal carcinoma of the pancreas and colorectal car…	hsa01521 (EGFR tyrosine kinase inhibitor resistance), hsa01522 (Endocrine resistance), hsa04010 (MAPK signaling pathway), hsa04012 (ErbB signaling pathway), hsa04014 (Ras signaling pathway), hsa04015 (Rap1 signaling pathway), hsa04062 (Chemokine signaling pathway), hsa04068 (FoxO signaling pathway), hsa04071 (Sphingolipid signaling pathway), hsa04072 (Phospholipase D signaling pathway), hsa04137 …			-0.0827611	-0.448245		-0.220275	-0.134112	-0.062722		0.498867	0.257234	0.192013					144.147	43.9573	82.3467	0.6803	4.03619	11.728	0.00521213	0.07631	0.00245711	0.0765781	0.23887	0.818923	0.830829	0.0129004	0.0106199		14.8321	11.0652	13.3018	14.2435	15.0675	23.1898	19.3052	18.3635
ENSG00000133818	RRAS2	PC	RAS related 2	This gene encodes a member of the R-Ras subfamily of Ras-like small GTPases. The encoded protein associates with the plasma membrane and may function as a signal transducer. This protein may play an important role in activating signal transduction pathways that control cell proliferation. Mutations in this gene are associated with the growth of certain tumors. Pseudogenes of this gene are found o…	hsa04010 (MAPK signaling pathway), hsa04014 (Ras signaling pathway), hsa04024 (cAMP signaling pathway), hsa04072 (Phospholipase D signaling pathway), hsa04137 (Mitophagy - animal), hsa04140 (Autophagy - animal), hsa04218 (Cellular senescence), hsa04371 (Apelin signaling pathway), hsa04625 (C-type lectin receptor signaling pathway), hsa04810 (Regulation of actin cytoskeleton), hsa05205 (Proteoglyc…			0.357872	0.311027		-0.0633277	-0.0757248	-0.134489		-0.263267	-0.140988	0.0088981					138.803	86.6267	32.9775	-0.442455	6.83873	12.2432	0.00455179	0.0724552	0.00291481	0.119433	0.23887	-0.718132	-0.827862	0.0448173	0.0111621		145.378	140.669	108.062	107.12	102.765	93.8186	102.294	113.712
ENSG00000177606	JUN	PC	Jun proto-oncogene, AP-1 transcription factor subunit	This gene is the putative transforming gene of avian sarcoma virus 17. It encodes a protein which is highly similar to the viral protein, and which interacts directly with specific target DNA sequences to regulate gene expression. This gene is intronless and is mapped to 1p32-p31, a chromosomal region involved in both translocations and deletions in human malignancies. [provided by RefSeq, Jul 20…	hsa01522 (Endocrine resistance), hsa04010 (MAPK signaling pathway), hsa04012 (ErbB signaling pathway), hsa04024 (cAMP signaling pathway), hsa04137 (Mitophagy - animal), hsa04210 (Apoptosis), hsa04310 (Wnt signaling pathway), hsa04380 (Osteoclast differentiation), hsa04510 (Focal adhesion), hsa04530 (Tight junction), hsa04620 (Toll-like receptor signaling pathway), hsa04621 (NOD-like receptor sign…			-0.118967	-0.22173		-0.0615155	-0.286083	0.00619131		0.379296	0.227999	0.0748098					116.592	66.2844	93.9215	0.445627	5.30676	8.40229	0.0136711	0.122093	0.0124108	0.0765781	0.23887	0.818923	0.780664	0.0129004	0.0222306		35.6676	33.0778	37.1978	31.5475	39.0813	51.2059	45.9087	41.0824
ENSG00000107643	MAPK8	PC	mitogen-activated protein kinase 8	The protein encoded by this gene is a member of the MAP kinase family. MAP kinases act as an integration point for multiple biochemical signals, and are involved in a wide variety of cellular processes such as proliferation, differentiation, transcription regulation and development. This kinase is activated by various cell stimuli, and targets specific transcription factors, and thus mediates imm…	hsa01522 (Endocrine resistance), hsa04010 (MAPK signaling pathway), hsa04012 (ErbB signaling pathway), hsa04014 (Ras signaling pathway), hsa04024 (cAMP signaling pathway), hsa04068 (FoxO signaling pathway), hsa04071 (Sphingolipid signaling pathway), hsa04137 (Mitophagy - animal), hsa04140 (Autophagy - animal), hsa04141 (Protein processing in endoplasmic reticulum), hsa04210 (Apoptosis), hsa04215 …			0.393595	0.354063		-0.271612	0.122715	-0.043314		-0.152952	-0.211063	-0.191431					116.3	25.6793	88.3811	-0.669898	3.05802	9.29179	0.0103855	0.105398	0.00642021	0.119433	0.23887	-0.718132	-0.865634	0.0448173	0.00546996		11.0652	10.712	6.23888	8.8286	7.65146	6.94517	6.59202	6.70974
ENSG00000126458	RRAS	PC	RAS related		hsa04010 (MAPK signaling pathway), hsa04014 (Ras signaling pathway), hsa04015 (Rap1 signaling pathway), hsa04024 (cAMP signaling pathway), hsa04072 (Phospholipase D signaling pathway), hsa04137 (Mitophagy - animal), hsa04140 (Autophagy - animal), hsa04218 (Cellular senescence), hsa04360 (Axon guidance), hsa04371 (Apelin signaling pathway), hsa04625 (C-type lectin receptor signaling pathway), hsa0…			0.0906149	0.206197		-0.0232868	0.00854962	0.00568426		-0.116983	-0.134261	-0.036516					103.049	86.8296	14.5743	-0.244428	6.8641	6.10142	0.0299438	0.176701	0.0527092	0.0439369	0.23887	-0.944911	-0.905267	0.000400878	0.00197729		123.6	134.077	114.066	116.655	116.42	106.767	105.472	113.006
ENSG00000173726	TOMM20	PC	translocase of outer mitochondrial membrane 20		GO:0006626 (protein targeting to mitochondrion), GO:0016031 (tRNA import into mitochondrion), GO:0016236 (macroautophagy), GO:0016579 (protein deubiquitination), GO:0030150 (protein import into mitochondrial matrix), GO:0070096 (mitochondrial outer membrane translocase complex assembly), GO:0005739 (mitochondrion), GO:0005741 (mitochondrial outer membrane), GO:0005742 (mitochondrial outer membran…			0.70907	0.905084		-0.36404	-0.351933	-0.41351		-0.0882221	-0.03241	-0.36404					99.1377	73.7562	46.9166	-0.918838	5.79792	11.8972	0.00498357	0.0747675	0.000990164	0.0796494	0.23887	-0.380235	-0.733035	0.352797	0.0385511		86.1672	98.9981	39.9053	40.2584	38.4927	48.7339	50.735	39.9053
ENSG00000156469	MTERF3	PC	mitochondrial transcription termination factor 3		GO:0006351 (transcription, DNA-templated), GO:0008380 (RNA splicing), GO:0016236 (macroautophagy), GO:0032502 (developmental process), GO:0042255 (ribosome assembly), GO:0045892 (negative regulation of transcription, DNA-templated), GO:0005654 (nucleoplasm), GO:0005739 (mitochondrion), GO:0005741 (mitochondrial outer membrane), GO:0003690 (double-stranded DNA binding), GO:0003727 (single-stranded…			0.50346	0.719194		-0.450771	-0.254365	-0.159203		0.183461	-0.280838	-0.260938					90.4744	59.8359	26.8372	-0.697814	4.92459	7.50681	0.0182991	0.140923	0.00991254	0.133469	0.23887	-0.566947	-0.678771	0.1428	0.0641854		41.7887	48.8516	20.6001	23.8961	25.6618	33.0778	23.4252	23.7784
ENSG00000185591	SP1	PC	Sp1 transcription factor	The protein encoded by this gene is a zinc finger transcription factor that binds to GC-rich motifs of many promoters. The encoded protein is involved in many cellular processes, including cell differentiation, cell growth, apoptosis, immune responses, response to DNA damage, and chromatin remodeling. Post-translational modifications such as phosphorylation, acetylation, glycosylation, and proteo…	hsa01522 (Endocrine resistance), hsa04137 (Mitophagy - animal), hsa04350 (TGF-beta signaling pathway), hsa04915 (Estrogen signaling pathway), hsa04927 (Cortisol synthesis and secretion), hsa04928 (Parathyroid hormone synthesis, secretion and action), hsa04934 (Cushing syndrome), hsa05016 (Huntington disease), hsa05163 (Human cytomegalovirus infection), hsa05200 (Pathways in cancer), hsa05202 (Tra…			0.44172	0.137626		-0.0794099	0.0288463	-0.176275		-0.357522	-0.0063442	0.0113583					81.1382	64.7054	90.3485	-0.402654	5.20913	5.64196	0.035552	0.193406	0.0360181	0.133469	0.23887	-0.64254	-0.691327	0.085764	0.0575545		50.0287	40.1407	34.255	37.0801	31.9007	27.8984	36.1384	36.6093
ENSG00000057663	ATG5	PC	autophagy related 5		hsa04136 (Autophagy - other), hsa04137 (Mitophagy - animal), hsa04140 (Autophagy - animal), hsa04211 (Longevity regulating pathway), hsa04213 (Longevity regulating pathway - multiple species), hsa04216 (Ferroptosis), hsa04621 (NOD-like receptor signaling pathway), hsa04622 (RIG-I-like receptor signaling pathway), hsa05131 (Shigellosis), GO:0000045 (autophagic vacuole assembly), GO:0000422 (mitoch…			0.0547785	0.621213		-0.219453	0.0822644	-0.0911012		-0.288182	-0.186279	0.0267588					78.5047	8.13338	79.6118	-0.721658	2.08329	5.24313	0.0414656	0.210233	0.0339101	0.199666	0.31515	-0.655138	-0.660609	0.0778443	0.0745441		4.12001	7.06288	3.06058	4.23773	3.53144	2.82515	3.1783	4.0023
ENSG00000170315	UBB	PC	ubiquitin B	This gene encodes ubiquitin, one of the most conserved proteins known. Ubiquitin has a major role in targeting cellular proteins for degradation by the 26S proteosome. It is also involved in the maintenance of chromatin structure, the regulation of gene expression, and the stress response. Ubiquitin is synthesized as a precursor protein consisting of either polyubiquitin chains or a single ubiqui…	hsa04137 (Mitophagy - animal), hsa04144 (Endocytosis), hsa05012 (Parkinson disease), hsa05167 (Kaposi sarcoma-associated herpesvirus infection), GO:0000086 (G2/M transition of mitotic cell cycle), GO:0000122 (negative regulation of transcription from RNA polymerase II promoter), GO:0000165 (MAPK cascade), GO:0000187 (activation of MAPK activity), GO:0000209 (protein polyubiquitination), GO:000071…			-0.158057	-0.398538		0.151925	0.0285908	0.127333		0.125944	0.0393865	0.0834164					78.293	98.4827	12.4835	0.324595	9.62091	6.65753	0.0245055	0.15956	0.0278733	0.119433	0.23887	0.491354	0.73063	0.216255	0.0395239		700.285	592.458	868.617	797.282	853.902	853.078	803.285	828.241
ENSG00000116688	MFN2	PC	mitofusin 2	This gene encodes a mitochondrial membrane protein that participates in mitochondrial fusion and contributes to the maintenance and operation of the mitochondrial network. This protein is involved in the regulation of vascular smooth muscle cell proliferation, and it may play a role in the pathophysiology of obesity. Mutations in this gene cause Charcot-Marie-Tooth disease type 2A2, and hereditar…	hsa04137 (Mitophagy - animal), hsa04621 (NOD-like receptor signaling pathway), GO:0001825 (blastocyst formation), GO:0006626 (protein targeting to mitochondrion), GO:0006915 (apoptotic process), GO:0006986 (response to unfolded protein), GO:0007006 (mitochondrial membrane organization), GO:0007596 (blood coagulation), GO:0008053 (mitochondrial fusion), GO:0016236 (macroautophagy), GO:0034497 (pro…			-0.177353	-0.037877		-0.0411634	0.0105407	-0.0150797		0.0372729	0.0711481	0.152512					75.4805	85.1976	67.5077	0.198388	6.70961	3.74877	0.0773727	0.284126	0.126771	0.0621765	0.23887	0.881917	0.848254	0.00376031	0.00777158		91.9352	101.47	101.235	105.002	103.118	107.003	109.592	116.067
ENSG00000175768	TOMM5	PC	translocase of outer mitochondrial membrane 5		GO:0006626 (protein targeting to mitochondrion), GO:0016236 (macroautophagy), GO:0005739 (mitochondrion), GO:0005741 (mitochondrial outer membrane), GO:0005742 (mitochondrial outer membrane translocase complex), GO:0016021 (integral component of membrane), GO:0008565 (protein transporter activity), R-HSA-1268020 (Homo sapiens: Mitochondrial protein import), R-HSA-392499 (Homo sapiens: Metabolism …			0.0408877	-0.98469		0.440029	-0.278943	0.0408877		0.367877	0.211754	0.162197					72.9432	65.958	37.0798	0.63622	5.28133	4.79018	0.0496781	0.229296	0.0367116	0.240944	0.349633	0.627387	0.627164	0.0958842	0.0960381		38.2573	17.7749	51.0882	30.2527	38.2573	48.4985	43.319	41.7887
ENSG00000140941	MAP1LC3B	PC	microtubule associated protein 1 light chain 3 beta	The product of this gene is a subunit of neuronal microtubule-associated MAP1A and MAP1B proteins, which are involved in microtubule assembly and important for neurogenesis. Studies on the rat homolog implicate a role for this gene in autophagy, a process that involves the bulk degradation of cytoplasmic component. [provided by RefSeq, Jul 2008]. Publication Note: This RefSeq record includes a su…	hsa04216 (Ferroptosis), GO:0000422 (mitochondrion degradation), GO:0006914 (autophagy), GO:0016236 (macroautophagy), GO:0061024 (membrane organization), GO:0097352 (autophagic vacuole maturation), GO:0000421 (autophagic vacuole membrane), GO:0005622 (intracellular), GO:0005739 (mitochondrion), GO:0005776 (autophagic vacuole), GO:0005829 (cytosol), GO:0005874 (microtubule), GO:0005930 (axoneme), G…			0.547389	0.436684		-0.282701	-0.246721	-0.187542		-0.117638	-0.104699	-0.0447736					66.8153	74.0296	29.9691	-0.54495	5.81272	8.51324	0.0132003	0.120235	0.00776395	0.0439369	0.23887	-0.264575	-0.712644	0.526586	0.0472703		80.87	74.7488	44.6139	45.791	47.7922	50.2642	50.735	52.9716
ENSG00000213585	VDAC1	PC	voltage dependent anion channel 1	This gene encodes a voltage-dependent anion channel protein that is a major component of the outer mitochondrial membrane. The encoded protein facilitates the exchange of metabolites and ions across the outer mitochondrial membrane and may regulate mitochondrial functions. This protein also forms channels in the plasma membrane and may be involved in transmembrane electron transport. Alternate sp…	hsa04020 (Calcium signaling pathway), hsa04022 (cGMP-PKG signaling pathway), hsa04217 (Necroptosis), hsa04218 (Cellular senescence), hsa04621 (NOD-like receptor signaling pathway), hsa04979 (Cholesterol metabolism), hsa05012 (Parkinson disease), hsa05016 (Huntington disease), hsa05164 (Influenza A), hsa05166 (Human T-cell leukemia virus 1 infection), GO:0001662 (behavioral fear response), GO:0006…			0.187025	0.298819		-0.0792024	-0.104181	-0.175832		-0.104994	-0.128774	0.107139					62.1479	93.6133	37.2563	-0.253104	7.80922	3.93635	0.071213	0.271633	0.0871028	0.133469	0.23887	-0.566947	-0.617106	0.1428	0.103123		253.675	274.275	210.592	206.942	196.819	206.825	203.411	239.903
ENSG00000050748	MAPK9	PC	mitogen-activated protein kinase 9	The protein encoded by this gene is a member of the MAP kinase family. MAP kinases act as an integration point for multiple biochemical signals, and are involved in a wide variety of cellular processes such as proliferation, differentiation, transcription regulation and development. This kinase targets specific transcription factors, and thus mediates immediate-early gene expression in response t…	hsa01522 (Endocrine resistance), hsa04010 (MAPK signaling pathway), hsa04012 (ErbB signaling pathway), hsa04014 (Ras signaling pathway), hsa04024 (cAMP signaling pathway), hsa04068 (FoxO signaling pathway), hsa04071 (Sphingolipid signaling pathway), hsa04137 (Mitophagy - animal), hsa04140 (Autophagy - animal), hsa04141 (Protein processing in endoplasmic reticulum), hsa04210 (Apoptosis), hsa04215 …			-0.406934	-0.158533		0.00155227	0.249143	0.0211819		0.371438	-0.00505076	-0.0727985					55.7705	54.0138	80.6087	0.388512	4.60249	3.67888	0.0798325	0.288082	0.0880684	0.119433	0.23887	0.491354	0.594438	0.216255	0.120156		17.4218	21.0709	23.7784	28.6047	24.1315	31.3121	23.6607	22.4835
ENSG00000139112	GABARAPL1	PC	GABA type A receptor associated protein like 1		hsa04068 (FoxO signaling pathway), hsa04136 (Autophagy - other), hsa04137 (Mitophagy - animal), hsa04140 (Autophagy - animal), hsa04371 (Apelin signaling pathway), hsa04621 (NOD-like receptor signaling pathway), hsa04727 (GABAergic synapse), hsa05167 (Kaposi sarcoma-associated herpesvirus infection), GO:0016236 (macroautophagy), GO:0097352 (autophagic vacuole maturation), GO:0000421 (autophagic v…			0.316289	0.123112		-0.085294	-0.150091	-0.0468186		-0.181008	-0.0950753	0.118887					55.1595	63.6909	29.8191	-0.257952	5.14699	2.78703	0.121543	0.354457	0.149472	0.133469	0.23887	-0.64254	-0.603697	0.085764	0.11302		44.0253	38.2573	32.8424	31.3121	33.7841	30.6058	32.607	38.1396
ENSG00000171552	BCL2L1	PC	BCL2 like 1	The protein encoded by this gene belongs to the BCL-2 protein family. BCL-2 family members form hetero- or homodimers and act as anti- or pro-apoptotic regulators that are involved in a wide variety of cellular activities. The proteins encoded by this gene are located at the outer mitochondrial membrane, and have been shown to regulate outer mitochondrial membrane channel (VDAC) opening. VDAC reg…	hsa01521 (EGFR tyrosine kinase inhibitor resistance), hsa01524 (Platinum drug resistance), hsa04014 (Ras signaling pathway), hsa04064 (NF-kappa B signaling pathway), hsa04115 (p53 signaling pathway), hsa04137 (Mitophagy - animal), hsa04140 (Autophagy - animal), hsa04151 (PI3K-Akt signaling pathway), hsa04210 (Apoptosis), hsa04215 (Apoptosis - multiple species), hsa04621 (NOD-like receptor signali…			-0.462356	-0.272877		0.15652	0.147703	0.220985		0.00121544	0.120923	0.087887					51.0498	89.0173	47.6577	0.384176	7.1138	5.45499	0.0381889	0.201613	0.0374514	0.0439369	0.23887	0.264575	0.64844	0.526586	0.0819995		98.6449	112.771	152.558	151.617	159.621	136.784	148.791	145.378
ENSG00000075785	RAB7A	PC	RAB7A, member RAS oncogene family	RAB family members are small, RAS-related GTP-binding proteins that are important regulators of vesicular transport. Each RAB protein targets multiple proteins that act in exocytic / endocytic pathways. This gene encodes a RAB family member that regulates vesicle traffic in the late endosomes and also from late endosomes to lysosomes. This encoded protein is also involved in the cellular vacuolat…	hsa04137 (Mitophagy - animal), hsa04140 (Autophagy - animal), hsa04144 (Endocytosis), hsa04145 (Phagosome), hsa05132 (Salmonella infection), hsa05146 (Amoebiasis), hsa05152 (Tuberculosis), GO:0000045 (autophagic vacuole assembly), GO:0006622 (protein targeting to lysosome), GO:0006897 (endocytosis), GO:0007174 (epidermal growth factor catabolic process), GO:0008333 (endosome to lysosome transport…			0.664154	0.206203		-0.417391	-0.175948	-0.183061		-0.036294	-0.0192203	-0.0384425					44.8172	81.4044	14.442	-0.435813	6.3446	4.34179	0.0598162	0.250814	0.0517541	0.0439369	0.23887	-0.264575	-0.556036	0.526586	0.152392		126.543	91.582	58.7396	69.8048	69.4517	77.1031	78.0448	76.9854
ENSG00000118689	FOXO3	PC	forkhead box O3	This gene belongs to the forkhead family of transcription factors which are characterized by a distinct forkhead domain. This gene likely functions as a trigger for apoptosis through expression of genes necessary for cell death. Translocation of this gene with the MLL gene is associated with secondary acute leukemia. Alternatively spliced transcript variants encoding the same protein have been ob…	hsa01521 (EGFR tyrosine kinase inhibitor resistance), hsa04062 (Chemokine signaling pathway), hsa04068 (FoxO signaling pathway), hsa04137 (Mitophagy - animal), hsa04151 (PI3K-Akt signaling pathway), hsa04152 (AMPK signaling pathway), hsa04211 (Longevity regulating pathway), hsa04213 (Longevity regulating pathway - multiple species), hsa04218 (Cellular senescence), hsa04722 (Neurotrophin signaling…			-0.378535	0.0845416		-0.128496	-0.0643518	-0.0960675		0.366362	0.412172	-0.195626					42.9041	6.68666	99.0207	0.569668	1.99551	2.77416	0.122321	0.355205	0.116108	0.56584	0.646528	0.390563	0.556846	0.338756	0.151668		2.35429	4.0023	3.1783	3.41373	3.29601	5.29716	5.53259	2.94287
ENSG00000204435	CSNK2B	PC	casein kinase 2 beta	This gene encodes the beta subunit of casein kinase II, a ubiquitous protein kinase which regulates metabolic pathways, signal transduction, transcription, translation, and replication. The enzyme is composed of three subunits, alpha, alpha prime and beta, which form a tetrameric holoenzyme. The alpha and alpha prime subunits are catalytic, while the beta subunit serves regulatory functions. The …	hsa03008 (Ribosome biogenesis in eukaryotes), hsa04064 (NF-kappa B signaling pathway), hsa04137 (Mitophagy - animal), hsa04310 (Wnt signaling pathway), hsa04520 (Adherens junction), hsa05162 (Measles), hsa05168 (Herpes simplex infection), GO:0006457 (protein folding), GO:0006656 (phosphatidylcholine biosynthetic process), GO:0007165 (signal transduction), GO:0008285 (negative regulation of cell p…			0.0266562	0.154425		-0.00101211	0.0594817	-0.0930655		-0.110637	-0.0630319	0.0271831					42.3064	98.0593	20.5117	-0.135163	9.30367	2.02409	0.180932	0.43807	0.258134	0.362805	0.46944	-0.516551	-0.643298	0.189961	0.0852747		642.487	702.168	630.244	657.319	591.163	583.983	603.641	642.722
ENSG00000101266	CSNK2A1	PC	casein kinase 2 alpha 1	Casein kinase II is a serine/threonine protein kinase that phosphorylates acidic proteins such as casein. It is involved in various cellular processes, including cell cycle control, apoptosis, and circadian rhythm. The kinase exists as a tetramer and is composed of an alpha, an alpha-prime, and two beta subunits. The alpha subunits contain the catalytic activity while the beta subunits undergo au…	hsa03008 (Ribosome biogenesis in eukaryotes), hsa04064 (NF-kappa B signaling pathway), hsa04137 (Mitophagy - animal), hsa04310 (Wnt signaling pathway), hsa04520 (Adherens junction), hsa05162 (Measles), hsa05168 (Herpes simplex infection), GO:0006351 (transcription, DNA-templated), GO:0006355 (regulation of transcription, DNA-templated), GO:0006457 (protein folding), GO:0006468 (protein phosphoryl…			0.557931	0.279036		-0.282855	-0.24147	-0.252639		0.046694	0.0344933	-0.14119					42.1961	72.9799	54.5479	-0.398344	5.73952	3.89249	0.0725983	0.274349	0.0688131	0.0439369	0.23887	-0.264575	-0.561872	0.526586	0.147219		77.6917	63.6837	42.495	43.7899	43.4367	53.9133	53.4425	47.0859
ENSG00000197122	SRC	PC	SRC proto-oncogene, non-receptor tyrosine kinase	This gene is highly similar to the v-src gene of Rous sarcoma virus. This proto-oncogene may play a role in the regulation of embryonic development and cell growth. The protein encoded by this gene is a tyrosine-protein kinase whose activity can be inhibited by phosphorylation by c-SRC kinase. Mutations in this gene could be involved in the malignant progression of colon cancer. Two transcript va…	hsa01521 (EGFR tyrosine kinase inhibitor resistance), hsa01522 (Endocrine resistance), hsa04012 (ErbB signaling pathway), hsa04015 (Rap1 signaling pathway), hsa04062 (Chemokine signaling pathway), hsa04137 (Mitophagy - animal), hsa04144 (Endocytosis), hsa04360 (Axon guidance), hsa04370 (VEGF signaling pathway), hsa04510 (Focal adhesion), hsa04520 (Adherens junction), hsa04530 (Tight junction), hs…			0.189036	-0.112181		0.102867	0.289979	0.146595		-0.364995	-0.0866415	-0.164658					42.1189	14.4054	77.124	-0.400274	2.44084	1.85839	0.198468	0.459524	0.211043	0.128022	0.23887	-0.554348	-0.533132	0.153907	0.173641		6.12116	4.59087	5.65031	6.70974	5.88573	3.53144	4.70859	4.35544
ENSG00000174775	HRAS	PC	HRas proto-oncogene, GTPase	This gene belongs to the Ras oncogene family, whose members are related to the transforming genes of mammalian sarcoma retroviruses. The products encoded by these genes function in signal transduction pathways. These proteins can bind GTP and GDP, and they have intrinsic GTPase activity. This protein undergoes a continuous cycle of de- and re-palmitoylation, which regulates its rapid exchange bet…	hsa01521 (EGFR tyrosine kinase inhibitor resistance), hsa01522 (Endocrine resistance), hsa04010 (MAPK signaling pathway), hsa04012 (ErbB signaling pathway), hsa04014 (Ras signaling pathway), hsa04015 (Rap1 signaling pathway), hsa04062 (Chemokine signaling pathway), hsa04068 (FoxO signaling pathway), hsa04071 (Sphingolipid signaling pathway), hsa04072 (Phospholipase D signaling pathway), hsa04137 …			-0.637807	-0.21013		0.191149	0.288286	0.185607		-0.00505773	0.177254	0.0106982					42.101	90.8433	14.6361	0.405238	7.34395	3.87642	0.073114	0.275155	0.0681457	0.0439369	0.23887	0.264575	0.553985	0.526586	0.154233		101.705	137.491	182.222	195.053	181.516	158.797	180.457	160.563
ENSG00000104765	BNIP3L	PC	BCL2 interacting protein 3 like	This gene is a member of the BCL2/adenovirus E1B 19 kd-interacting protein (BNIP) family. It interacts with the E1B 19 kDa protein, which protects cells from virally-induced cell death. The encoded protein also interacts with E1B 19 kDa-like sequences of BCL2, another apoptotic protector. This protein counteracts the apoptotic inducer BNIP3 and may play a role in tumor suppression. [provided by R…	hsa04137 (Mitophagy - animal), GO:0010917 (negative regulation of mitochondrial membrane potential), GO:0016239 (positive regulation of macroautophagy), GO:0035694 (mitochondrial protein catabolic process), GO:0042981 (regulation of apoptotic process), GO:0043065 (positive regulation of apoptotic process), GO:0043066 (negative regulation of apoptotic process), GO:0051607 (defense response to viru…			0.338179	1.48982		-0.799421	-0.521405	-0.711948		0.0784036	0.097901	0.028475					41.261	44.7777	40.8381	-0.945737	4.07702	3.73514	0.077845	0.284937	0.0585	0.0439369	0.23887	-0.264575	-0.491226	0.526586	0.216393		18.7166	44.0253	7.41603	9.41718	8.0046	15.3029	15.5383	14.7143
ENSG00000176171	BNIP3	PC	BCL2 interacting protein 3	This gene is encodes a mitochondrial protein that contains a BH3 domain and acts as a pro-apoptotic factor. The encoded protein interacts with anti-apoptotic proteins, including the E1B 19 kDa protein and Bcl2. This gene is silenced in tumors by DNA methylation. [provided by RefSeq, Dec 2014]. Publication Note: This RefSeq record includes a subset of the publications that are available for this g…	hsa04068 (FoxO signaling pathway), hsa04137 (Mitophagy - animal), hsa04140 (Autophagy - animal), hsa05134 (Legionellosis), GO:0000422 (mitochondrion degradation), GO:0001666 (response to hypoxia), GO:0006915 (apoptotic process), GO:0008219 (cell death), GO:0008626 (granzyme-mediated apoptotic signaling pathway), GO:0010508 (positive regulation of autophagy), GO:0010637 (negative regulation of mit…			0.47923	-0.255755		0.0921891	0.169361	-0.058062		-0.0319082	-0.328169	-0.0668864					38.4075	47.2036	71.4777	-0.336162	4.21829	2.14396	0.169477	0.425041	0.183767	0.388896	0.486699	-0.403162	-0.471923	0.321989	0.237744		26.0149	14.8321	19.4229	20.6001	17.3041	17.6572	14.008	17.1863
ENSG00000183735	TBK1	PC	TANK binding kinase 1	The NF-kappa-B (NFKB) complex of proteins is inhibited by I-kappa-B (IKB) proteins, which inactivate NFKB by trapping it in the cytoplasm. Phosphorylation of serine residues on the IKB proteins by IKB kinases marks them for destruction via the ubiquitination pathway, thereby allowing activation and nuclear translocation of the NFKB complex. The protein encoded by this gene is similar to IKB kinas…	hsa04014 (Ras signaling pathway), hsa04137 (Mitophagy - animal), hsa04620 (Toll-like receptor signaling pathway), hsa04621 (NOD-like receptor signaling pathway), hsa04622 (RIG-I-like receptor signaling pathway), hsa04623 (Cytosolic DNA-sensing pathway), hsa04657 (IL-17 signaling pathway), hsa05160 (Hepatitis C), hsa05161 (Hepatitis B), hsa05162 (Measles), hsa05163 (Human cytomegalovirus infection…			0.647251	0.0351925		-0.111365	-0.185848	-0.214801		0.0433669	-0.0933297	-0.120467					34.8174	47.5741	15.5448	-0.426146	4.23417	3.50709	0.0862975	0.298976	0.0878662	0.102512	0.23887	-0.201581	-0.537706	0.63215	0.169278		29.6641	18.7166	16.7155	15.7738	15.4206	18.8344	16.9509	16.5978
ENSG00000214253	FIS1	PC	fission, mitochondrial 1	The balance between fission and fusion regulates the morphology of mitochondria. TTC11 is a component of a mitochondrial complex that promotes mitochondrial fission (James et al., 2003 [PubMed 12783892]).[supplied by OMIM, Mar 2008]. Publication Note: This RefSeq record includes a subset of the publications that are available for this gene. Please see the Gene record to access additional publicat…	hsa04137 (Mitophagy - animal), GO:0000266 (mitochondrial fission), GO:0000422 (mitochondrion degradation), GO:0001836 (release of cytochrome c from mitochondria), GO:0006626 (protein targeting to mitochondrion), GO:0007204 (positive regulation of cytosolic calcium ion concentration), GO:0008053 (mitochondrial fusion), GO:0010821 (regulation of mitochondrion organization), GO:0014850 (response to …			-0.113954	-0.0834269		0.115141	-0.0605943	0.0705899		0.0936737	0.0139025	-0.0353322					33.7254	87.5882	10.1985	0.112658	6.94868	1.08371	0.318902	0.581763	0.402109	0.133469	0.23887	0.566947	0.522584	0.1428	0.183933		113.595	116.067	133.488	117.95	129.368	131.487	124.307	120.069
ENSG00000221983	UBA52	PC	ubiquitin A-52 residue ribosomal protein fusion product 1	Ubiquitin is a highly conserved nuclear and cytoplasmic protein that has a major role in targeting cellular proteins for degradation by the 26S proteosome. It is also involved in the maintenance of chromatin structure, the regulation of gene expression, and the stress response. Ubiquitin is synthesized as a precursor protein consisting of either polyubiquitin chains or a single ubiquitin moiety f…	hsa03010 (Ribosome), GO:0000086 (G2/M transition of mitotic cell cycle), GO:0000122 (negative regulation of transcription from RNA polymerase II promoter), GO:0000165 (MAPK cascade), GO:0000184 (nuclear-transcribed mRNA catabolic process, nonsense-mediated decay), GO:0000187 (activation of MAPK activity), GO:0000209 (protein polyubiquitination), GO:0000715 (nucleotide-excision repair, DNA damage …			-0.013144	-0.149998		0.05572	0.0300976	-0.0176532		0.10817	0.0418225	-0.0550157					31.7184	99.2943	13.0481	0.106051	10.4204	1.26583	0.283101	0.546096	0.373595	0.405442	0.495642	0.440959	0.560821	0.274128	0.148143		1355.96	1233.06	1422.35	1397.27	1351.72	1475.08	1408.69	1317.11
ENSG00000123240	OPTN	PC	optineurin	This gene encodes the coiled-coil containing protein optineurin. Optineurin may play a role in normal-tension glaucoma and adult-onset primary open angle glaucoma. Optineurin interacts with adenovirus E3-14.7K protein and may utilize tumor necrosis factor-alpha or Fas-ligand pathways to mediate apoptosis, inflammation or vasoconstriction. Optineurin may also function in cellular morphogenesis and…	hsa04137 (Mitophagy - animal), GO:0000042 (protein targeting to Golgi), GO:0000086 (G2/M transition of mitotic cell cycle), GO:0001920 (negative regulation of receptor recycling), GO:0006914 (autophagy), GO:0007030 (Golgi organization), GO:0007165 (signal transduction), GO:0008219 (cell death), GO:0010508 (positive regulation of autophagy), GO:0043001 (Golgi to plasma membrane protein transport),…			0.0063943	-0.0475753		-0.103643	-0.103643	-0.00612401		0.00327489	0.154344	0.0969716					31.615	72.6359	69.2633	0.126726	5.71669	1.09425	0.316662	0.579822	0.394505	0.0929678	0.23887	0.494305	0.568366	0.213083	0.141578		52.5008	50.4996	48.4985	48.4985	52.0299	52.383	58.3865	56.0322
ENSG00000100644	HIF1A	PC	hypoxia inducible factor 1 subunit alpha	This gene encodes the alpha subunit of transcription factor hypoxia-inducible factor-1 (HIF-1), which is a heterodimer composed of an alpha and a beta subunit. HIF-1 functions as a master regulator of cellular and systemic homeostatic response to hypoxia by activating transcription of many genes, including those involved in energy metabolism, angiogenesis, apoptosis, and other genes whose protein…	hsa04066 (HIF-1 signaling pathway), hsa04137 (Mitophagy - animal), hsa04140 (Autophagy - animal), hsa04659 (Th17 cell differentiation), hsa04919 (Thyroid hormone signaling pathway), hsa05167 (Kaposi sarcoma-associated herpesvirus infection), hsa05200 (Pathways in cancer), hsa05205 (Proteoglycans in cancer), hsa05211 (Renal cell carcinoma), hsa05230 (Central carbon metabolism in cancer), hsa05231 …			-0.857405	0.494694		-0.35039	-0.151064	-0.0828873		0.740282	0.441672	-0.234902					30.4653	42.2283	72.2717	0.511704	3.94403	1.62501	0.227129	0.490824	0.217414	0.573753	0.646528	0.327569	0.388894	0.428329	0.341007		6.94517	20.8355	10.712	12.5955	13.3018	25.0732	20.0115	11.7715
ENSG00000038532	CLEC16A	PC	C-type lectin domain containing 16A	This gene encodes a member of the C-type lectin domain containing family. Single nucleotide polymorphisms in introns of this gene have been associated with diabetes mellitus, multiple sclerosis and rheumatoid arthritis. Multiple transcript variants encoding different isoforms have been found for this gene. [provided by RefSeq, Aug 2011].	GO:0006914 (autophagy), GO:0032435 (negative regulation of proteasomal ubiquitin-dependent protein catabolic process), GO:1901098 (positive regulation of autophagic vacuole maturation), GO:1901525 (negative regulation of macromitophagy), GO:0036020 (endolysosome membrane)			-0.0751416	-0.454452		0.0722074	0.268359	0.0999537		0.224918	-0.221991	0.0861473					30.3639	50.9968	73.3392	0.273207	4.43104	1.48299	0.247297	0.511574	0.270292	0.199666	0.31515	0.352767	0.427612	0.391388	0.290603		19.8938	14.8321	22.2481	25.7795	22.7189	24.9555	17.7749	22.4835
ENSG00000101412	E2F1	PC	E2F transcription factor 1	The protein encoded by this gene is a member of the E2F family of transcription factors. The E2F family plays a crucial role in the control of cell cycle and action of tumor suppressor proteins and is also a target of the transforming proteins of small DNA tumor viruses. The E2F proteins contain several evolutionally conserved domains found in most members of the family. These domains include a D…	hsa01522 (Endocrine resistance), hsa04110 (Cell cycle), hsa04137 (Mitophagy - animal), hsa04218 (Cellular senescence), hsa04934 (Cushing syndrome), hsa05160 (Hepatitis C), hsa05161 (Hepatitis B), hsa05163 (Human cytomegalovirus infection), hsa05165 (Human papillomavirus infection), hsa05166 (Human T-cell leukemia virus 1 infection), hsa05167 (Kaposi sarcoma-associated herpesvirus infection), hsa0…			-0.147575	-0.296602		0.102893	0.171564	0.137637		0.0231855	0.0430591	-0.0341609					30.3023	91.549	83.8906	0.192485	7.44706	2.02758	0.180585	0.437603	0.221837	0.0439369	0.23887	0.264575	0.49166	0.526586	0.215925		156.325	140.787	186.342	195.524	190.933	176.219	178.691	169.274
ENSG00000126858	RHOT1	PC	ras homolog family member T1		hsa04137 (Mitophagy - animal), GO:0007264 (small GTPase mediated signal transduction), GO:0016579 (protein deubiquitination), GO:0019725 (cellular homeostasis), GO:0047497 (mitochondrion transport along microtubule), GO:0051056 (regulation of small GTPase mediated signal transduction), GO:0097345 (mitochondrial outer membrane permeabilization), GO:0005739 (mitochondrion), GO:0005741 (mitochondria…			0.0724221	0.426087		-0.127896	-0.324955	0.0179692		0.200189	-0.239553	-0.024263					28.3149	31.8013	69.3075	-0.279042	3.3891	1.26002	0.284155	0.547075	0.302851	0.199666	0.31515	-0.352767	-0.420121	0.391388	0.300056		10.712	14.2435	9.06403	7.65146	10.2412	11.8892	8.24003	9.88803
ENSG00000141510	TP53	PC	tumor protein p53	This gene encodes a tumor suppressor protein containing transcriptional activation, DNA binding, and oligomerization domains. The encoded protein responds to diverse cellular stresses to regulate expression of target genes, thereby inducing cell cycle arrest, apoptosis, senescence, DNA repair, or changes in metabolism. Mutations in this gene are associated with a variety of human cancers, includi…	hsa01522 (Endocrine resistance), hsa01524 (Platinum drug resistance), hsa04010 (MAPK signaling pathway), hsa04071 (Sphingolipid signaling pathway), hsa04110 (Cell cycle), hsa04115 (p53 signaling pathway), hsa04137 (Mitophagy - animal), hsa04151 (PI3K-Akt signaling pathway), hsa04210 (Apoptosis), hsa04211 (Longevity regulating pathway), hsa04216 (Ferroptosis), hsa04218 (Cellular senescence), hsa04…			0.04856	0.0237461		-0.00697026	0.0397468	0.00937279		-0.0935214	-0.0571405	0.0362064					27.0636	83.3186	65.858	-0.0772033	6.51931	0.574499	0.46347	0.708007	0.552688	0.290512	0.393599	-0.592144	-0.63088	0.121962	0.0934932		94.6426	92.9946	90.9935	94.054	92.0529	85.5786	87.8152	93.8186
ENSG00000128272	ATF4	PC	activating transcription factor 4	This gene encodes a transcription factor that was originally identified as a widely expressed mammalian DNA binding protein that could bind a tax-responsive enhancer element in the LTR of HTLV-1. The encoded protein was also isolated and characterized as the cAMP-response element binding protein 2 (CREB-2). The protein encoded by this gene belongs to a family of DNA-binding proteins that includes…	hsa04010 (MAPK signaling pathway), hsa04022 (cGMP-PKG signaling pathway), hsa04137 (Mitophagy - animal), hsa04141 (Protein processing in endoplasmic reticulum), hsa04151 (PI3K-Akt signaling pathway), hsa04210 (Apoptosis), hsa04211 (Longevity regulating pathway), hsa04261 (Adrenergic signaling in cardiomyocytes), hsa04668 (TNF signaling pathway), hsa04720 (Long-term potentiation), hsa04722 (Neurot…			-0.0510962	-0.142595		0.0809303	0.0712801	0.0326057		-0.0228552	-0.0418263	0.0735566					24.1535	95.1394	66.1138	0.0832733	8.14158	0.683287	0.424993	0.677217	0.508505	0.0956344	0.23887	0.415761	0.431463	0.305624	0.285801		271.921	255.088	298.171	296.17	288.283	277.336	273.687	296.641
ENSG00000106052	TAX1BP1	PC	Tax1 binding protein 1	This gene encodes a HTLV-1 tax1 binding protein. The encoded protein interacts with TNFAIP3, and inhibits TNF-induced apoptosis by mediating the TNFAIP3 anti-apoptotic activity. Degradation of this protein by caspase-3-like family proteins is associated with apoptosis induced by TNF. This protein may also have a role in the inhibition of inflammatory signaling pathways. Alternatively spliced tran…	hsa04137 (Mitophagy - animal), GO:0006915 (apoptotic process), GO:0010803 (regulation of tumor necrosis factor-mediated signaling pathway), GO:0032088 (negative regulation of NF-kappaB transcription factor activity), GO:0032480 (negative regulation of type I interferon production), GO:0043066 (negative regulation of apoptotic process), GO:0005829 (cytosol), GO:0070062 (extracellular vesicular exo…			0.0374117	-0.0539996		0.0771218	-0.124318	-0.127324		0.0279866	0.100434	0.062688					22.8212	87.4118	71.266	0.0854568	6.92773	0.610223	0.450221	0.697721	0.525089	0.388896	0.486699	0.403162	0.402777	0.321989	0.322496		124.542	116.773	128.074	111.123	110.887	123.718	130.192	126.779
ENSG00000138592	USP8	PC	ubiquitin specific peptidase 8	This gene encodes a protein that belongs to the ubiquitin-specific processing protease family of proteins. The encoded protein is thought to regulate the morphology of the endosome by ubiquitination of proteins on this organelle and is involved in cargo sorting and membrane trafficking at the early endosome stage. This protein is required for the cell to enter the S phase of the cell cycle and al…	hsa04137 (Mitophagy - animal), hsa04144 (Endocytosis), hsa04934 (Cushing syndrome), GO:0000281 (mitotic cytokinesis), GO:0006511 (ubiquitin-dependent protein catabolic process), GO:0007032 (endosome organization), GO:0008283 (cell proliferation), GO:0016579 (protein deubiquitination), GO:0070536 (protein K63-linked deubiquitination), GO:0071108 (protein K48-linked deubiquitination), GO:0005634 (n…			0.0852854	0.692403		-0.130767	-0.234279	-0.411691		0.141505	0.177803	-0.32026					20.7802	42.3518	77.8386	-0.388765	3.95091	1.80514	0.20457	0.466629	0.206381	0.208161	0.322233	-0.138587	-0.414663	0.743457	0.307034		15.7738	25.0732	13.3018	12.2423	10.5943	16.4801	16.9509	11.4183
ENSG00000130204	TOMM40	PC	translocase of outer mitochondrial membrane 40	TOMM40 is the channel-forming subunit of the translocase of the mitochondrial outer membrane (TOM) complex that is essential for protein import into mitochondria (Humphries et al., 2005 [PubMed 15644312]).[supplied by OMIM, May 2008].	hsa05014 (Amyotrophic lateral sclerosis (ALS)), GO:0006626 (protein targeting to mitochondrion), GO:0006811 (ion transport), GO:0016236 (macroautophagy), GO:0030150 (protein import into mitochondrial matrix), GO:0005739 (mitochondrion), GO:0005741 (mitochondrial outer membrane), GO:0005742 (mitochondrial outer membrane translocase complex), GO:0005743 (mitochondrial inner membrane), GO:0005829 (c…			-0.268093	0.168234		0.121214	0.18865	0.149697		-0.17549	-0.103393	-0.0808187					19.7371	96.295	51.3719	-0.124728	8.46507	0.684774	0.424504	0.676992	0.464044	0.235877	0.342764	-0.277174	-0.279626	0.506303	0.50239		290.991	394.462	381.749	400.112	389.4	310.414	326.423	331.602
ENSG00000068323	TFE3	PC	transcription factor binding to IGHM enhancer 3	This gene encodes a basic helix-loop-helix domain-containing transcription factor that binds MUE3-type E-box sequences in the promoter of genes. The encoded protein promotes the expression of genes downstream of transforming growth factor beta (TGF-beta) signaling. This gene may be involved in chromosomal translocations in renal cell carcinomas and other cancers, resulting in the production of fu…	hsa04137 (Mitophagy - animal), hsa05202 (Transcriptional misregulation in cancer), hsa05211 (Renal cell carcinoma), GO:0002250 (adaptive immune response), GO:0006366 (transcription from RNA polymerase II promoter), GO:0006959 (humoral immune response), GO:0045670 (regulation of osteoclast differentiation), GO:0045785 (positive regulation of cell adhesion), GO:0045944 (positive regulation of trans…			0.22328	-0.0519573		0.0974026	-0.04737	-0.133474		0.00104372	-0.00561493	-0.0833091					17.2922	90.1112	66.3255	-0.114019	7.24722	0.96371	0.346118	0.608686	0.414041	0.789693	0.833671	-0.163785	-0.409258	0.698352	0.31402		176.925	145.849	161.975	146.319	137.726	151.381	150.675	142.67
ENSG00000164442	CITED2	PC	Cbp/p300 interacting transactivator with Glu/Asp rich carboxy-terminal domain 2	The protein encoded by this gene inhibits transactivation of HIF1A-induced genes by competing with binding of hypoxia-inducible factor 1-alpha to p300-CH1. Mutations in this gene are a cause of cardiac septal defects. Alternatively spliced transcript variants encoding multiple isoforms have been observed for this gene. [provided by RefSeq, May 2012].	hsa04137 (Mitophagy - animal), GO:0000122 (negative regulation of transcription from RNA polymerase II promoter), GO:0001666 (response to hypoxia), GO:0001889 (liver development), GO:0003151 (outflow tract morphogenesis), GO:0003156 (regulation of organ formation), GO:0006351 (transcription, DNA-templated), GO:0007368 (determination of left/right symmetry), GO:0007507 (heart development), GO:0007…			-0.232679	0.769113		-0.253075	-0.193891	-0.372687		0.0751249	0.188899	0.0191953					16.0922	91.3814	63.2025	-0.195551	7.41719	0.556449	0.470417	0.714257	0.472233	0.149154	0.252534	0.21418	-0.217137	0.610525	0.605484		140.551	283.457	138.55	144.436	127.367	174.453	188.932	167.743
ENSG00000154174	TOMM70	PC	translocase of outer mitochondrial membrane 70	This gene encodes an import receptor of the outer mitochondrial membrane that is part of the translocase of the outer membrane complex. This protein is involved in the import of mitochondrial precursor proteins. [provided by RefSeq, Oct 2011]. Publication Note: This RefSeq record includes a subset of the publications that are available for this gene. Please see the Gene record to access additiona…	GO:0006626 (protein targeting to mitochondrion), GO:0016236 (macroautophagy), GO:0071806 (protein transmembrane transport), GO:0005739 (mitochondrion), GO:0005741 (mitochondrial outer membrane), GO:0005742 (mitochondrial outer membrane translocase complex), GO:0016020 (membrane), GO:0016021 (integral component of membrane), GO:0070062 (extracellular vesicular exosome), GO:0005515 (protein binding…			0.0614656	0.629912		-0.194201	-0.416605	-0.293216		0.191106	0.0490814	-0.0275432					15.1405	55.0635	73.0304	-0.252702	4.6582	0.95959	0.347111	0.609386	0.35841	0.0621765	0.23887	-0.125988	-0.3152	0.76626	0.446977		25.5441	38.8458	21.0709	17.7749	19.5406	28.1338	25.3087	23.8961
ENSG00000172071	EIF2AK3	PC	eukaryotic translation initiation factor 2 alpha kinase 3	The protein encoded by this gene phosphorylates the alpha subunit of eukaryotic translation-initiation factor 2 (EIF2), leading to its inactivation, and thus to a rapid reduction of translational initiation and repression of global protein synthesis. It is a type I membrane protein located in the endoplasmic reticulum (ER), where it is induced by ER stress caused by malfolded proteins. Mutations …	hsa04137 (Mitophagy - animal), hsa04140 (Autophagy - animal), hsa04141 (Protein processing in endoplasmic reticulum), hsa04210 (Apoptosis), hsa04932 (Non-alcoholic fatty liver disease (NAFLD)), hsa05010 (Alzheimer disease), hsa05160 (Hepatitis C), hsa05162 (Measles), hsa05164 (Influenza A), hsa05168 (Herpes simplex infection), GO:0001501 (skeletal system development), GO:0001503 (ossification), G…			-0.233726	0.398625		-0.282644	-0.186413	-0.163326		0.268843	0.251768	-0.0531265					12.2563	19.566	79.5412	0.123742	2.73673	0.161567	0.694964	0.858777	0.706311	0.235877	0.342764	0.277174	0.156057	0.506303	0.712109		5.06173	8.94632	4.8263	5.29716	5.41488	8.0046	7.88688	6.00345
ENSG00000136436	CALCOCO2	PC	calcium binding and coiled-coil domain 2	This gene encodes a coiled-coil domain-containing protein. The encoded protein functions as a receptor for ubiquitin-coated bacteria and plays an important role in innate immunity by mediating macroautophagy. Alternatively spliced transcript variants encoding multiple isoforms have been observed for this gene. [provided by RefSeq, May 2012].	hsa04137 (Mitophagy - animal), GO:0016032 (viral process), GO:0034341 (response to interferon-gamma), GO:0098792 (NA), GO:1901098 (positive regulation of autophagic vacuole maturation), GO:0000421 (autophagic vacuole membrane), GO:0005634 (nucleus), GO:0005737 (cytoplasm), GO:0005776 (autophagic vacuole), GO:0005829 (cytosol), GO:0005856 (cytoskeleton), GO:0016020 (membrane), GO:0031410 (cytoplas…			0.395808	-0.160674		-0.02572	-0.0517198	-0.02572		-0.105169	0.0249148	-0.0517198					11.1082	12.156	15.3419	-0.246992	2.31851	0.822058	0.382872	0.642998	0.407995	0.944679	0.957532	-0.0765092	-0.400603	0.857104	0.325363		6.82745	4.0023	4.59087	4.47316	4.59087	4.23773	4.8263	4.47316
ENSG00000121749	TBC1D15	PC	TBC1 domain family member 15	This gene encodes a member of the Ras-like proteins in brain-GTPase activating protein superfamily that share a conserved Tre-2/Bub2/Cdc16 domain. The encoded protein interacts with Ras-like protein in brain 5A and may function as a regulator of intracellular trafficking. Alternate splicing results in multiple transcript variants. [provided by RefSeq, Apr 2009].	hsa04137 (Mitophagy - animal), GO:0006886 (intracellular protein transport), GO:0031338 (regulation of vesicle fusion), GO:0043087 (regulation of GTPase activity), GO:0090630 (NA), GO:0005622 (intracellular), GO:0005737 (cytoplasm), GO:0005739 (mitochondrion), GO:0012505 (endomembrane system), GO:0070062 (extracellular vesicular exosome), GO:0005096 (GTPase activator activity), GO:0005515 (protei…			0.123062	-0.0966286		0.0648446	0.0130026	0.0477701		-0.184691	0.247921	-0.215281					10.6393	45.7657	43.0348	-0.066862	4.12647	0.117635	0.737698	0.880952	0.763375	0.757465	0.809219	-0.251976	-0.157409	0.547162	0.709697		18.8344	15.8915	18.0103	17.3041	17.7749	14.8321	20.7178	14.4789
ENSG00000126775	ATG14	PC	autophagy related 14		hsa04140 (Autophagy - animal), hsa05167 (Kaposi sarcoma-associated herpesvirus infection), GO:0000045 (autophagic vacuole assembly), GO:0000423 (macromitophagy), GO:0001932 (regulation of protein phosphorylation), GO:0001933 (negative regulation of protein phosphorylation), GO:0001934 (positive regulation of protein phosphorylation), GO:0008333 (endosome to lysosome transport), GO:0009267 (cellul…			-0.139746	-0.00782171		0.0336021	-0.0361135	0.0870462		0.534539	-0.28496	-0.186546					10.5532	32.1542	97.7856	0.163286	3.40522	0.352199	0.564167	0.782102	0.584556	0.573753	0.646528	-0.125988	0.205863	0.76626	0.624774		9.06403	10.1235	10.4766	9.88803	10.9475	15.6561	8.0046	8.71089
ENSG00000140983	RHOT2	PC	ras homolog family member T2	This gene encodes a member of the Rho family of GTPases. The encoded protein is localized to the outer mitochondrial membrane and plays a role in mitochondrial trafficking and fusion-fission dynamics. [provided by RefSeq, Nov 2011].	hsa04137 (Mitophagy - animal), GO:0007264 (small GTPase mediated signal transduction), GO:0019725 (cellular homeostasis), GO:0047497 (mitochondrion transport along microtubule), GO:0051056 (regulation of small GTPase mediated signal transduction), GO:0097345 (mitochondrial outer membrane permeabilization), GO:0005829 (cytosol), GO:0005886 (plasma membrane), GO:0016020 (membrane), GO:0031307 (inte…			-0.462007	0.0623551		-0.00922589	0.21436	0.185505		-0.0584236	-0.00755898	0.0749966					10.4188	84.8271	31.6806	0.146156	6.66679	0.704929	0.417958	0.671844	0.44943	0.367879	0.469732	0.0755929	0.293637	0.858802	0.480259		72.3945	105.002	99.8221	116.891	114.536	96.4083	99.9398	105.943
ENSG00000110497	AMBRA1	PC	autophagy and beclin 1 regulator 1		hsa04137 (Mitophagy - animal), hsa04140 (Autophagy - animal), GO:0000045 (autophagic vacuole assembly), GO:0000422 (mitochondrion degradation), GO:0000423 (macromitophagy), GO:0008285 (negative regulation of cell proliferation), GO:0009267 (cellular response to starvation), GO:0010508 (positive regulation of autophagy), GO:0010667 (negative regulation of cardiac muscle cell apoptotic process), GO…			-0.199038	-0.22584		0.316446	0.328777	0.0372095		-0.0801537	-0.0559048	-0.121497					9.68389	49.7354	82.9113	0.0647441	4.35631	0.0778364	0.785121	0.905928	0.800832	0.0439369	0.23887	0.264575	0.0986465	0.526586	0.816234		17.1863	16.8332	25.4264	25.6618	20.6001	18.8344	19.1875	18.2458
ENSG00000171109	MFN1	PC	mitofusin 1	The protein encoded by this gene is a mediator of mitochondrial fusion. This protein and mitofusin 2 are homologs of the Drosophila protein fuzzy onion (Fzo). They are mitochondrial membrane proteins that interact with each other to facilitate mitochondrial targeting. [provided by RefSeq, Jul 2008]. Publication Note: This RefSeq record includes a subset of the publications that are available for …	hsa04137 (Mitophagy - animal), hsa04621 (NOD-like receptor signaling pathway), GO:0008053 (mitochondrial fusion), GO:0016236 (macroautophagy), GO:0046039 (GTP metabolic process), GO:0051646 (mitochondrion localization), GO:1990613 (NA), GO:0005739 (mitochondrion), GO:0005741 (mitochondrial outer membrane), GO:0016021 (integral component of membrane), GO:0031306 (intrinsic component of mitochondri…			0.0270503	-0.0069009		0.170657	0.139957	-0.0069009		0.287313	-0.671396	0.0602209					9.20393	25.6793	65.8315	-0.103965	3.05802	0.109636	0.746413	0.885273	0.754216	0.681791	0.754175	0.196455	-0.136521	0.641016	0.747186		8.12231	7.88688	9.18175	8.94632	7.88688	10.1235	4.23773	8.35774
ENSG00000034713	GABARAPL2	PC	GABA type A receptor associated protein like 2		hsa04068 (FoxO signaling pathway), hsa04136 (Autophagy - other), hsa04137 (Mitophagy - animal), hsa04140 (Autophagy - animal), hsa04371 (Apelin signaling pathway), hsa04621 (NOD-like receptor signaling pathway), hsa04727 (GABAergic synapse), hsa05167 (Kaposi sarcoma-associated herpesvirus infection), GO:0006891 (intra-Golgi vesicle-mediated transport), GO:0006914 (autophagy), GO:0015031 (protein …			-0.094649	0.199233		-0.0093547	-0.0768086	-0.094649		0.0039422	0.0206109	0.0516751					8.06004	92.3518	26.9696	-0.0192101	7.57414	0.029862	0.865757	0.943235	0.886369	0.277307	0.383453	0.310525	-0.0808787	0.454111	0.849012		177.749	218.361	188.697	179.986	177.749	190.462	192.699	196.937
ENSG00000187098	MITF	PC	melanogenesis associated transcription factor	This gene encodes a transcription factor that contains both basic helix-loop-helix and leucine zipper structural features. It regulates the differentiation and development of melanocytes retinal pigment epithelium and is also responsible for pigment cell-specific transcription of the melanogenesis enzyme genes. Heterozygous mutations in the this gene cause auditory-pigmentary syndromes, such as W…	hsa04137 (Mitophagy - animal), hsa04380 (Osteoclast differentiation), hsa04916 (Melanogenesis), hsa05200 (Pathways in cancer), hsa05202 (Transcriptional misregulation in cancer), hsa05218 (Melanoma), GO:0000122 (negative regulation of transcription from RNA polymerase II promoter), GO:0006355 (regulation of transcription, DNA-templated), GO:0006366 (transcription from RNA polymerase II promoter),…			0.217655	-0.226026		-0.0624972	-0.197451	0.17458		0.300129	-0.169432	-0.0369577					7.53479	13.1881	60.8116	0.0556035	2.3728	0.0342621	0.85632	0.939259	0.863369	0.757465	0.809219	0.251976	0.0805374	0.547162	0.849644		6.00345	3.88458	4.59087	4.0023	5.76802	6.47431	4.12001	4.70859
ENSG00000126581	BECN1	PC	beclin 1	Beclin-1 participates in the regulation of autophagy and has an important role in development, tumorigenesis, and neurodegeneration (Zhong et al., 2009 [PubMed 19270693]).[supplied by OMIM, Jul 2010]. Publication Note: This RefSeq record includes a subset of the publications that are available for this gene. Please see the Gene record to access additional publications.	hsa04136 (Autophagy - other), hsa04137 (Mitophagy - animal), hsa04140 (Autophagy - animal), hsa04215 (Apoptosis - multiple species), hsa04371 (Apelin signaling pathway), hsa05167 (Kaposi sarcoma-associated herpesvirus infection), GO:0000045 (autophagic vacuole assembly), GO:0000422 (mitochondrion degradation), GO:0000423 (macromitophagy), GO:0000910 (cytokinesis), GO:0001666 (response to hypoxia)…			-0.0210095	0.887394		-0.418909	-0.324576	-0.270801		0.242037	0.0995864	-0.193721					5.87645	52.1965	28.3194	-0.401678	4.49268	1.56547	0.235305	0.49971	0.231092	0.0765781	0.23887	0.0125988	-0.358585	0.97638	0.383065		20.9532	41.0824	15.4206	16.5978	17.3041	25.5441	22.9544	18.3635
ENSG00000103197	TSC2	PC	TSC complex subunit 2	Mutations in this gene lead to tuberous sclerosis complex. Its gene product is believed to be a tumor suppressor and is able to stimulate specific GTPases. The protein associates with hamartin in a cytosolic complex, possibly acting as a chaperone for hamartin. Alternative splicing results in multiple transcript variants encoding different isoforms. [provided by RefSeq, Jul 2008].	hsa04072 (Phospholipase D signaling pathway), hsa04115 (p53 signaling pathway), hsa04140 (Autophagy - animal), hsa04150 (mTOR signaling pathway), hsa04151 (PI3K-Akt signaling pathway), hsa04152 (AMPK signaling pathway), hsa04211 (Longevity regulating pathway), hsa04218 (Cellular senescence), hsa04714 (Thermogenesis), hsa04910 (Insulin signaling pathway), hsa04919 (Thyroid hormone signaling pathwa…			-0.168246	-0.0368823		0.105985	0.233931	0.123714		-0.17365	-0.000417368	-0.084435					5.55344	78.3522	77.0534	-0.025664	6.11518	0.0284917	0.868841	0.944494	0.883921	0.082085	0.23887	-0.151186	-0.0663466	0.720817	0.875965		60.9762	66.9797	74.1603	81.2231	75.102	60.7408	68.7454	64.7431
ENSG00000175224	ATG13	PC	autophagy related 13		hsa04136 (Autophagy - other), hsa04140 (Autophagy - animal), hsa04211 (Longevity regulating pathway), GO:0000045 (autophagic vacuole assembly), GO:0000423 (macromitophagy), GO:0016236 (macroautophagy), GO:0098780 (NA), GO:1903955 (NA), GO:0000407 (pre-autophagosomal structure), GO:0005739 (mitochondrion), GO:0005789 (endoplasmic reticulum membrane), GO:0005829 (cytosol), GO:1990316 (ATG1/UKL1 kin…			-0.108849	-0.159875		0.214204	-0.00153206	0.191766		0.168973	-0.0119116	-0.292775					5.47907	60.6387	35.1037	0.0682249	4.97	0.130118	0.724738	0.874585	0.748959	0.133469	0.23887	0.0629941	0.13996	0.882198	0.740982		28.487	27.4275	36.1384	30.8413	35.5498	34.9613	30.6058	24.8378
ENSG00000112561	TFEB	PC	transcription factor EB		hsa04137 (Mitophagy - animal), GO:0001892 (embryonic placenta development), GO:0002250 (adaptive immune response), GO:0006351 (transcription, DNA-templated), GO:0006355 (regulation of transcription, DNA-templated), GO:0006914 (autophagy), GO:0006959 (humoral immune response), GO:0007040 (lysosome organization), GO:0010508 (positive regulation of autophagy), GO:0045944 (positive regulation of tran…			-0.25009	-0.033225		0.095127	0.212987	0.347941		-0.137586	-0.330282	0.095127					4.59554	3.46683	43.6171	-0.0589105	1.79601	0.0237703	0.880098	0.949267	0.883669	0.110049	0.23887	-0.11407	-0.0600106	0.787966	0.88775		2.35429	3.06058	3.53144	4.0023	4.59087	2.70744	2.11886	3.53144
ENSG00000198925	ATG9A	PC	autophagy related 9A		hsa04136 (Autophagy - other), hsa04137 (Mitophagy - animal), hsa04140 (Autophagy - animal), GO:0000045 (autophagic vacuole assembly), GO:0000422 (mitochondrion degradation), GO:0015031 (protein transport), GO:0031667 (response to nutrient levels), GO:0034497 (protein localization to pre-autophagosomal structure), GO:0034727 (piecemeal microautophagy of nucleus), GO:0044805 (late nucleophagy), GO:…			-0.0777928	-0.131565		0.242734	0.09448	0.0142187		-0.0813159	0.0240892	-0.0848477					3.72541	71.3391	53.2775	0.026677	5.6246	0.0328706	0.859233	0.940997	0.877648	0.133469	0.23887	0.0629941	0.079728	0.882198	0.851142		46.2619	44.4962	58.2688	52.383	49.4402	46.1442	49.7933	46.0264
ENSG00000099968	BCL2L13	PC	BCL2 like 13	This gene encodes a mitochondrially-localized protein with conserved B-cell lymphoma 2 homology motifs. Overexpression of the encoded protein results in apoptosis. Alternatively spliced transcript variants have been observed for this gene. [provided by RefSeq, Jul 2012].	hsa04137 (Mitophagy - animal), hsa05134 (Legionellosis), GO:0006915 (apoptotic process), GO:0006919 (activation of cysteine-type endopeptidase activity involved in apoptotic process), GO:0005634 (nucleus), GO:0005739 (mitochondrion), GO:0016021 (integral component of membrane), GO:0031966 (mitochondrial membrane), GO:0005515 (protein binding), GO:0008656 (cysteine-type endopeptidase activator act…			0.0598298	-0.142283		0.173133	-0.0376899	0.00211242		0.0456155	-0.0529035	-0.0478145					2.91973	61.8472	91.5042	0.00842977	5.03813	0.00344101	0.954213	0.983807	0.960945	0.573753	0.646528	-0.125988	0.0340102	0.76626	0.93628		34.0195	29.311	36.9624	31.6653	32.607	33.6664	31.3121	31.4298
ENSG00000104946	TBC1D17	PC	TBC1 domain family member 17		hsa04137 (Mitophagy - animal), GO:0006886 (intracellular protein transport), GO:0006914 (autophagy), GO:0031338 (regulation of vesicle fusion), GO:0042147 (retrograde transport, endosome to Golgi), GO:0061024 (membrane organization), GO:0090630 (NA), GO:0005776 (autophagic vacuole), GO:0005829 (cytosol), GO:0012505 (endomembrane system), GO:0055037 (recycling endosome), GO:0005096 (GTPase activat…			-0.0166146	-0.261931		0.104103	0.347715	0.0649758		-0.0864819	-0.108679	-0.0430878					2.50457	60.5769	66.0521	0.00695474	4.96389	0.00131747	0.971658	0.989056	0.974324	0.082085	0.23887	-0.151186	0.0135793	0.720817	0.974542		30.3704	25.3087	33.1955	39.6699	32.2538	28.8401	28.3692	29.7818
ENSG00000188554	NBR1	PC	NBR1, autophagy cargo receptor	The protein encoded by this gene was originally identified as an ovarian tumor antigen monitored in ovarian cancer. The encoded protein contains a B-box/coiled-coil motif, which is present in many genes with transformation potential. It functions as a specific autophagy receptor for the selective autophagic degradation of peroxisomes by forming intracellular inclusions with ubiquitylated autophag…	hsa04137 (Mitophagy - animal), GO:0016236 (macroautophagy), GO:0030500 (regulation of bone mineralization), GO:0032872 (regulation of stress-activated MAPK cascade), GO:0045668 (negative regulation of osteoblast differentiation), GO:0051259 (protein oligomerization), GO:0000407 (pre-autophagosomal structure), GO:0005654 (nucleoplasm), GO:0005739 (mitochondrion), GO:0005764 (lysosome), GO:0005770 …			0.250701	-0.0723125		-0.00630281	-0.319232	-0.0535233		0.276388	0.0293847	-0.105103					2.49042	76.9936	81.4292	0.00731502	6.01895	0.00184475	0.966465	0.987725	0.969274	0.573753	0.646528	0.125988	0.0160273	0.76626	0.969954		76.6323	60.8585	63.8014	50.9705	61.6825	78.0448	65.4494	59.4459
ENSG00000161011	SQSTM1	PC	sequestosome 1	This gene encodes a multifunctional protein that binds ubiquitin and regulates activation of the nuclear factor kappa-B (NF-kB) signaling pathway. The protein functions as a scaffolding/adaptor protein in concert with TNF receptor-associated factor 6 to mediate activation of NF-kB in response to upstream signals. Alternatively spliced transcript variants encoding either the same or different isof…	hsa04137 (Mitophagy - animal), hsa04217 (Necroptosis), hsa04218 (Cellular senescence), hsa04380 (Osteoclast differentiation), hsa05418 (Fluid shear stress and atherosclerosis), GO:0000122 (negative regulation of transcription from RNA polymerase II promoter), GO:0000422 (mitochondrion degradation), GO:0000423 (macromitophagy), GO:0001934 (positive regulation of protein phosphorylation), GO:000237…			-0.36629	0.0193508		0.170497	0.281815	0.188134		-0.219557	-0.0612482	-0.0127009					2.41055	96.7272	31.8218	0.00611203	8.61927	0.00113289	0.973717	0.989221	0.975441	0.082085	0.23887	-0.151186	0.0109285	0.720817	0.979511		301.467	394.462	438.252	473.566	443.667	333.957	372.92	385.751
ENSG00000177169	ULK1	PC	unc-51 like autophagy activating kinase 1		hsa04137 (Mitophagy - animal), hsa04140 (Autophagy - animal), hsa04150 (mTOR signaling pathway), hsa04152 (AMPK signaling pathway), hsa04211 (Longevity regulating pathway), GO:0006468 (protein phosphorylation), GO:0006914 (autophagy), GO:0007165 (signal transduction), GO:0008104 (protein localization), GO:0016236 (macroautophagy), GO:0018105 (peptidyl-serine phosphorylation), GO:0018107 (peptidyl…			-0.139157	-0.076314		0.0019399	0.221776	0.221776		-0.204862	-0.109812	0.0846534					1.55047	64.3349	68.1253	-0.00487789	5.18191	0.000770001	0.97833	0.991272	0.980584	0.147837	0.252534	-0.0760469	-0.0109911	0.857961	0.979393		32.3715	33.9018	35.903	42.1419	42.1419	30.8413	33.0778	38.1396
ENSG00000158828	PINK1	PC	PTEN induced putative kinase 1	This gene encodes a serine/threonine protein kinase that localizes to mitochondria. It is thought to protect cells from stress-induced mitochondrial dysfunction. Mutations in this gene cause one form of autosomal recessive early-onset Parkinson disease. [provided by RefSeq, Jul 2008]. Publication Note: This RefSeq record includes a subset of the publications that are available for this gene. Plea…	hsa04137 (Mitophagy - animal), hsa05012 (Parkinson disease), GO:0000422 (mitochondrion degradation), GO:0001934 (positive regulation of protein phosphorylation), GO:0002082 (regulation of oxidative phosphorylation), GO:0006468 (protein phosphorylation), GO:0006511 (ubiquitin-dependent protein catabolic process), GO:0006950 (response to stress), GO:0006979 (response to oxidative stress), GO:000700…			-0.122894	-0.0198964		0.036887	0.0939182	0.189722		-0.0880404	-0.08442	-0.00527568					1.45668	92.5282	87.0931	-0.0166406	7.62858	0.0198962	0.890227	0.954289	0.906507	0.0765781	0.23887	-0.0125988	-0.0615476	0.97638	0.884889		180.927	194.465	202.352	210.592	225.188	185.401	185.872	196.466
ENSG00000135093	USP30	PC	ubiquitin specific peptidase 30	USP30, a member of the ubiquitin-specific protease family (see USP1, MIM 603478), is a novel mitochondrial deubiquitinating (DUB) enzyme (Nakamura and Hirose, 2008 [PubMed 18287522]).[supplied by OMIM, Dec 2008].	hsa04137 (Mitophagy - animal), GO:0000422 (mitochondrion degradation), GO:0006511 (ubiquitin-dependent protein catabolic process), GO:0008053 (mitochondrial fusion), GO:0016579 (protein deubiquitination), GO:0035871 (protein K11-linked deubiquitination), GO:0044313 (protein K6-linked deubiquitination), GO:0005739 (mitochondrion), GO:0005741 (mitochondrial outer membrane), GO:0016021 (integral com…			0.167887	-0.289643		-0.0889185	0.00185817	0.244246		0.0872595	-0.0889185	-0.03377					1.20434	24.259	46.5902	0.0242612	2.98751	0.0095309	0.923881	0.97047	0.929512	0.832992	0.872717	-0.0126745	0.0474466	0.976238	0.911171		8.8286	5.88573	7.06288	7.65146	9.41718	8.24003	7.06288	7.41603
ENSG00000181852	RNF41	PC	ring finger protein 41	This gene encodes an E3 ubiquitin ligase. The encoded protein plays a role in type 1 cytokine receptor signaling by controlling the balance between JAK2-associated cytokine receptor degradation and ectodomain shedding. Alternative splicing results in multiple transcript variants. [provided by RefSeq, Jun 2011].	hsa04144 (Endocytosis), GO:0000209 (protein polyubiquitination), GO:0006914 (autophagy), GO:0008285 (negative regulation of cell proliferation), GO:0010498 (proteasomal protein catabolic process), GO:0030336 (negative regulation of cell migration), GO:0043408 (regulation of MAPK cascade), GO:0045619 (regulation of lymphocyte differentiation), GO:0045637 (regulation of myeloid cell differentiation…			0.147834	0.0299926		0.0782902	-0.195483	-0.153045		-0.146092	0.125023	0.113481					0	55.2311	68.6105	-0.0349737	4.66909	0.043419	0.838522	0.931544	0.856484	0.249352	0.35404	0	-0.100988	1	0.811932		28.0161	25.6618	26.6035	21.6595	22.3658	22.4835	27.5452	27.3098

## Sheet: autophagy-assoc.
Gene ID	Gene	Biotype	Name	RefSeq_Summary	Annotation			Control			5 μg/ml				50 μg/ml				0	0.5	1	Score	LogCPM rank (%)	Tr.Length rank (%)	LogFC	LogCPM	F	p (QLF test)	FDR (QLF test)	p (LR test)	p (Krusk-W.)	FDR (Krusk-W.)	Spear- man r	Pearson r	p (Spearman)	p (Pearson)	CPMs:	4848k1	4848k3	4446b1	4446b2	4446b3	4848a1	4848a2	4848a3
Abysil overview								0	0		1	1	1		2	2	2																					0	0	1	1	1	2	2	2
Hi vs Low								-0.25	-0.25		0	0	0		1	1	1																							0	0	0	1	1	1
Hi vs Cnt								0	0		-0.25	-0.25	-0.25		1	1	1																					0	0				1	1	1
ENSG00000102710	SUPT20H	PC	SPT20 homolog, SAGA complex component		hsa04140 (Autophagy - animal), GO:0006914 (autophagy), GO:0007369 (gastrulation), GO:1903506 (regulation of nucleic acid-templated transcription), GO:0000124 (SAGA complex), GO:0001650 (fibrillar center), GO:0070461 (SAGA-type complex), GO:0003712 (transcription cofactor activity), GO:0005515 (protein binding), R-HSA-3214847 (Homo sapiens: HATs acetylate histones), R-HSA-3247509 (Homo sapiens: Ch…			0.410474	0.443834		-0.0149212	0.0297029	0.062288		-0.547972	-0.166089	-0.217316					285.072	68.9749	63.3524	-0.755372	5.4818	29.3441	0.000170146	0.0196814	4.28912e-06	0.0439369	0.23887	-0.944911	-0.953206	0.000400878	0.000247249		58.3865	59.7991	42.9659	44.3784	45.4379	29.0755	38.4927	37.0801
ENSG00000116209	TMEM59	PC	transmembrane protein 59		GO:0006508 (proteolysis), GO:0006914 (autophagy), GO:0010508 (positive regulation of autophagy), GO:0010955 (negative regulation of protein processing), GO:0090005 (negative regulation of establishment of protein localization to plasma membrane), GO:0090285 (negative regulation of protein glycosylation in Golgi), GO:0000137 (Golgi cis cisterna), GO:0000138 (Golgi trans cisterna), GO:0000139 (Golg…			0.846082	0.594169		-0.238259	-0.207609	-0.156534		-0.391001	-0.231636	-0.215211					261.852	92.2459	64.5346	-0.958825	7.55621	29.4405	0.000167763	0.0196058	5.80722e-07	0.0956344	0.23887	-0.793725	-0.841046	0.0186875	0.00888155		323.48	271.332	151.499	154.795	160.445	136.078	152.205	153.971
ENSG00000150991	UBC	PC	ubiquitin C	This gene represents a ubiquitin gene, ubiquitin C. The encoded protein is a polyubiquitin precursor. Conjugation of ubiquitin monomers or polymers can lead to various effects within a cell, depending on the residues to which ubiquitin is conjugated. Ubiquitination has been associated with protein degradation, DNA repair, cell cycle regulation, kinase modification, endocytosis, and regulation of …	hsa03320 (PPAR signaling pathway), GO:0000086 (G2/M transition of mitotic cell cycle), GO:0000122 (negative regulation of transcription from RNA polymerase II promoter), GO:0000165 (MAPK cascade), GO:0000187 (activation of MAPK activity), GO:0000209 (protein polyubiquitination), GO:0000715 (nucleotide-excision repair, DNA damage recognition), GO:0000717 (nucleotide-excision repair, DNA duplex unw…			-0.551006	-0.525438		0.147877	0.0816808	0.115739		0.355765	0.278727	0.0966557					247.798	96.939	24.1288	0.74495	8.68975	27.1291	0.000237603	0.0221456	5.45825e-06	0.0956344	0.23887	0.793725	0.901982	0.0186875	0.00218457		274.511	279.455	446.845	426.716	436.957	516.414	489.458	431.189
ENSG00000009844	VTA1	PC	vesicle trafficking 1	C6ORF55 encodes a protein involved in trafficking of the multivesicular body, an endosomal compartment involved in sorting membrane proteins for degradation in lysosomes (Ward et al., 2005 [PubMed 15644320]).[supplied by OMIM, Mar 2008].	hsa04144 (Endocytosis), GO:0015031 (protein transport), GO:0016197 (endosomal transport), GO:0016236 (macroautophagy), GO:0019058 (viral life cycle), GO:0036258 (multivesicular body assembly), GO:0046755 (viral budding), GO:0071985 (multivesicular body sorting pathway), GO:1904903 (NA), GO:0005654 (nucleoplasm), GO:0005829 (cytosol), GO:0010008 (endosome membrane), GO:0043231 (intracellular membr…			0.407929	0.749564		-0.019189	0.071837	-0.206652		-0.624003	-0.314101	-0.0653848					245.917	74.4884	90.6131	-0.91243	5.8404	25.0739	0.000329859	0.0261094	5.66871e-06	0.0685251	0.23887	-0.869318	-0.86185	0.00504681	0.00592757		73.3363	93.4655	54.031	57.6802	47.2036	34.8436	43.6722	52.2653
ENSG00000097033	SH3GLB1	PC	SH3 domain containing GRB2 like, endophilin B1	This gene encodes a SRC homology 3 domain-containing protein. The encoded protein interacts with the proapoptotic member of the Bcl-2 family, Bcl-2-associated X protein (Bax) and may be involved in regulating apoptotic signaling pathways. This protein may also be involved in maintaining mitochondrial morphology. Alternate splicing results in multiple transcript variants. [provided by RefSeq, Sep …	hsa04140 (Autophagy - animal), hsa04144 (Endocytosis), GO:0006914 (autophagy), GO:0006915 (apoptotic process), GO:0010508 (positive regulation of autophagy), GO:0016241 (regulation of macroautophagy), GO:0031647 (regulation of protein stability), GO:0032461 (positive regulation of protein oligomerization), GO:0032465 (regulation of cytokinesis), GO:0032801 (receptor catabolic process), GO:0034198…			0.401092	0.479019		-0.102506	0.0314297	-0.0598012		-0.437918	-0.308484	-0.00283161					220.774	82.7011	96.4535	-0.673483	6.46699	22.855	0.00048062	0.0295809	3.28416e-05	0.0956344	0.23887	-0.793725	-0.891606	0.0186875	0.00293065		114.654	121.128	80.2814	88.286	82.7534	63.2128	69.334	86.1672
ENSG00000113732	ATP6V0E1	PC	ATPase H+ transporting V0 subunit e1	This gene encodes a component of vacuolar ATPase (V-ATPase), a multisubunit enzyme that mediates acidification of eukaryotic intracellular organelles. V-ATPase dependent organelle acidification is necessary for such intracellular processes as protein sorting, zymogen activation, receptor-mediated endocytosis, and synaptic vesicle proton gradient generation. V-ATPase is composed of a cytosolic V1 …	hsa00190 (Oxidative phosphorylation), hsa01100 (Metabolic pathways), hsa04145 (Phagosome), hsa04721 (Synaptic vesicle cycle), hsa04966 (Collecting duct acid secretion), hsa05110 (Vibrio cholerae infection), hsa05120 (Epithelial cell signaling in Helicobacter pylori infection), hsa05165 (Human papillomavirus infection), hsa05323 (Rheumatoid arthritis), GO:0007035 (vacuolar acidification), GO:00082…			0.352833	0.47214		-0.164302	-0.0517577	-0.101286		-0.248436	-0.0795712	-0.179621					203.685	94.9806	15.4918	-0.553292	8.11526	20.2703	0.000770411	0.0349335	0.000114614	0.0956344	0.23887	-0.793725	-0.857662	0.0186875	0.00646179		348.906	379.159	243.199	263.092	254.146	229.308	258.031	240.609
ENSG00000213281	NRAS	PC	NRAS proto-oncogene, GTPase	This is an N-ras oncogene encoding a membrane protein that shuttles between the Golgi apparatus and the plasma membrane. This shuttling is regulated through palmitoylation and depalmitoylation by the ZDHHC9-GOLGA7 complex. The encoded protein, which has intrinsic GTPase activity, is activated by a guanine nucleotide-exchange factor and inactivated by a GTPase activating protein. Mutations in this…	hsa01521 (EGFR tyrosine kinase inhibitor resistance), hsa01522 (Endocrine resistance), hsa04010 (MAPK signaling pathway), hsa04012 (ErbB signaling pathway), hsa04014 (Ras signaling pathway), hsa04015 (Rap1 signaling pathway), hsa04062 (Chemokine signaling pathway), hsa04068 (FoxO signaling pathway), hsa04071 (Sphingolipid signaling pathway), hsa04072 (Phospholipase D signaling pathway), hsa04137 …			-0.268675	-0.264833		-0.132918	-0.241993	-0.208396		0.678448	0.289114	0.149254					193.132	72.7858	97.1592	0.723161	5.72394	16.4238	0.00168529	0.0489857	0.000279458	0.0439369	0.23887	0.944911	0.778152	0.000400878	0.0229563		42.1419	42.2596	46.4973	42.9659	44.0253	83.1066	62.9774	56.9739
ENSG00000204673	AKT1S1	PC	AKT1 substrate 1	AKT1S1 is a proline-rich substrate of AKT (MIM 164730) that binds 14-3-3 protein (see YWHAH, MIM 113508) when phosphorylated (Kovacina et al., 2003 [PubMed 12524439]).[supplied by OMIM, Mar 2008].	hsa04140 (Autophagy - animal), hsa04150 (mTOR signaling pathway), hsa04152 (AMPK signaling pathway), hsa04211 (Longevity regulating pathway), hsa04213 (Longevity regulating pathway - multiple species), hsa04714 (Thermogenesis), GO:0006469 (negative regulation of protein kinase activity), GO:0032007 (negative regulation of TOR signaling), GO:0038202 (TORC1 signaling), GO:0042981 (regulation of apo…			0.241227	0.185537		0.0700583	0.166049	-0.00600461		-0.339403	-0.221783	-0.0956805					183.435	86.6884	64.3582	-0.448979	6.84521	15.1946	0.00221768	0.0530372	0.00137921	0.0439369	0.23887	-0.944911	-0.910558	0.000400878	0.00167096		134.783	129.604	119.48	127.838	113.242	89.4632	97.2323	106.296
ENSG00000099940	SNAP29	PC	synaptosome associated protein 29	This gene, a member of the SNAP25 gene family, encodes a protein involved in multiple membrane trafficking steps. Two other members of this gene family, SNAP23 and SNAP25, encode proteins that bind a syntaxin protein and mediate synaptic vesicle membrane docking and fusion to the plasma membrane. The protein encoded by this gene binds tightly to multiple syntaxins and is localized to intracellula…	hsa04130 (SNARE interactions in vesicular transport), hsa04140 (Autophagy - animal), GO:0006887 (exocytosis), GO:0006903 (vesicle targeting), GO:0015031 (protein transport), GO:0016082 (synaptic vesicle priming), GO:0016240 (autophagic vacuole docking), GO:0031629 (synaptic vesicle fusion to presynaptic membrane), GO:0043312 (neutrophil degranulation), GO:0060271 (cilium morphogenesis), GO:006102…			-0.71464	-0.332112		0.16462	-0.0789621	0.0630721		0.107471	0.54424	0.246311					170.304	28.8638	72.7746	0.980162	3.22852	14.4622	0.00262888	0.05742	0.00053587	0.0685251	0.23887	0.869318	0.862281	0.00504681	0.00587422		4.59087	6.59202	10.1235	8.24003	9.29946	9.65261	13.7726	10.8298
ENSG00000130147	SH3BP4	PC	SH3 domain binding protein 4	This gene encodes a protein with 3 Asn-Pro-Phe (NPF) motifs, an SH3 domain, a PXXP motif, a bipartite nuclear targeting signal, and a tyrosine phosphorylation site. This protein is involved in cargo-specific control of clathrin-mediated endocytosis, specifically controlling the internalization of a specific protein receptor. [provided by RefSeq, Jul 2008]. Publication Note: This RefSeq record inc…	GO:0006897 (endocytosis), GO:0008285 (negative regulation of cell proliferation), GO:0010508 (positive regulation of autophagy), GO:0030308 (negative regulation of cell growth), GO:0032007 (negative regulation of TOR signaling), GO:0034260 (negative regulation of GTPase activity), GO:0050790 (regulation of catalytic activity), GO:0061462 (protein localization to lysosome), GO:0071230 (cellular re…			0.629524	0.38		-0.125245	-0.12167	-0.176256		-0.357823	-0.17997	-0.0485605					170.078	72.0625	67.1901	-0.686871	5.67989	16.6755	0.00159567	0.0481079	0.000273115	0.119433	0.23887	-0.718132	-0.817164	0.0448173	0.0132613		78.0448	65.3317	45.4379	45.5556	43.7899	38.375	43.6722	48.0276
ENSG00000138069	RAB1A	PC	RAB1A, member RAS oncogene family	This gene encodes a member of the Ras superfamily of GTPases. Members of the gene family cycle between inactive GDP-bound and active GTP-bound forms. This small GTPase controls vesicle traffic from the endoplasmic reticulum to the Golgi apparatus. Multiple alternatively spliced transcript variants have been identified for this gene which encode different protein isoforms. [provided by RefSeq, Oct…	hsa05134 (Legionellosis), GO:0000045 (autophagic vacuole assembly), GO:0006888 (ER to Golgi vesicle-mediated transport), GO:0006890 (retrograde vesicle-mediated transport, Golgi to ER), GO:0006897 (endocytosis), GO:0006914 (autophagy), GO:0007030 (Golgi organization), GO:0016192 (vesicle-mediated transport), GO:0016477 (cell migration), GO:0019068 (virion assembly), GO:0030252 (growth hormone sec…			0.328346	0.629802		-0.195225	-0.00607823	-0.179761		-0.229839	-0.173622	-0.173622					169.718	76.0674	58.906	-0.663852	5.95844	17.99	0.00120951	0.0424729	0.000186144	0.130269	0.23887	-0.646399	-0.820952	0.0832906	0.0124919		76.5146	94.7603	52.6185	60.2699	53.207	51.3236	53.4425	53.4425
ENSG00000196683	TOMM7	PC	translocase of outer mitochondrial membrane 7	This gene encodes a subunit of the translocase of the outer mitochondrial membrane. The encoded protein regulates the assembly and stability of the translocase complex. [provided by RefSeq, Oct 2012].	hsa04137 (Mitophagy - animal), GO:0006626 (protein targeting to mitochondrion), GO:0016236 (macroautophagy), GO:0030150 (protein import into mitochondrial matrix), GO:0031647 (regulation of protein stability), GO:0045040 (protein import into mitochondrial outer membrane), GO:0098779 (NA), GO:1903955 (NA), GO:0005739 (mitochondrion), GO:0005741 (mitochondrial outer membrane), GO:0005742 (mitochond…			-0.126987	-0.482958		-0.0119796	-0.107889	0.0764326		0.441869	0.137359	0.0741541					167.062	93.1634	4.43758	0.522573	7.73842	14.0458	0.0029026	0.0603741	0.00108691	0.0685251	0.23887	0.869318	0.807064	0.00504681	0.015457		192.346	149.851	208.473	194.936	221.774	286.282	231.427	221.421
ENSG00000143947	RPS27A	PC	ribosomal protein S27a	Ubiquitin, a highly conserved protein that has a major role in targeting cellular proteins for degradation by the 26S proteosome, is synthesized as a precursor protein consisting of either polyubiquitin chains or a single ubiquitin fused to an unrelated protein. This gene encodes a fusion protein consisting of ubiquitin at the N terminus and ribosomal protein S27a at the C terminus. When expresse…	hsa03010 (Ribosome), GO:0000086 (G2/M transition of mitotic cell cycle), GO:0000122 (negative regulation of transcription from RNA polymerase II promoter), GO:0000165 (MAPK cascade), GO:0000184 (nuclear-transcribed mRNA catabolic process, nonsense-mediated decay), GO:0000187 (activation of MAPK activity), GO:0000209 (protein polyubiquitination), GO:0000715 (nucleotide-excision repair, DNA damage …			-0.0550621	-0.434832		0.0120273	-0.141194	-0.03786		0.379651	0.0629352	0.214334					161.117	98.8444	9.09572	0.465891	9.93456	13.1454	0.00361775	0.0651419	0.00176273	0.0621765	0.23887	0.881917	0.810275	0.00376031	0.014736		930.299	714.528	974.678	876.268	941.482	1258.13	1009.76	1121.7
ENSG00000132256	TRIM5	PC	tripartite motif containing 5	The protein encoded by this gene is a member of the tripartite motif (TRIM) family. The TRIM motif includes three zinc-binding domains, a RING, a B-box type 1 and a B-box type 2, and a coiled-coil region. The protein forms homo-oligomers via the coilel-coil region and localizes to cytoplasmic bodies. It appears to function as a E3 ubiquitin-ligase and ubiqutinates itself to regulate its subcellul…	hsa05170 (Human immunodeficiency virus 1 infection), GO:0002218 (activation of innate immune response), GO:0002221 (pattern recognition receptor signaling pathway), GO:0006914 (autophagy), GO:0031664 (regulation of lipopolysaccharide-mediated signaling pathway), GO:0032880 (regulation of protein localization), GO:0043123 (positive regulation of I-kappaB kinase/NF-kappaB signaling), GO:0043410 (po…			-0.364876	-0.290866		0.0310969	0.0310969	-0.0892096		0.282081	0.245241	0.155437					157.918	30.2929	53.9921	0.666562	3.30568	12.034	0.00480726	0.0731478	0.00294971	0.0423134	0.23887	0.950586	0.969125	0.000290566	7.18892e-05		6.94517	7.41603	9.77032	9.77032	8.8286	12.0069	11.6538	10.8298
ENSG00000155975	VPS37A	PC	VPS37A, ESCRT-I subunit	This gene belongs to the VPS37 family, and encodes a component of the ESCRT-I (endosomal sorting complex required for transport I) protein complex, required for the sorting of ubiquitinated transmembrane proteins into internal vesicles of multivesicular bodies. Expression of this gene is downregulated in hepatocellular carcinoma, and mutations in this gene are associated with autosomal recessive …	hsa04144 (Endocytosis), GO:0015031 (protein transport), GO:0016197 (endosomal transport), GO:0016236 (macroautophagy), GO:0019058 (viral life cycle), GO:0036258 (multivesicular body assembly), GO:0039702 (viral budding via host ESCRT complex), GO:0043162 (ubiquitin-dependent protein catabolic process via the multivesicular body sorting pathway), GO:0075733 (intracellular transport of virus), GO:0…			0.774659	0.726917		-0.186754	-0.286656	-0.259688		-0.568332	-0.212381	0.0122336					155.779	65.6581	53.6039	-0.978869	5.2632	17.4548	0.00135177	0.0446754	9.13284e-05	0.133469	0.23887	-0.566947	-0.806731	0.1428	0.015533		63.0951	60.9762	31.4298	29.1932	29.7818	23.6607	30.8413	36.3738
ENSG00000005893	LAMP2	PC	lysosomal associated membrane protein 2	The protein encoded by this gene is a member of a family of membrane glycoproteins. This glycoprotein provides selectins with carbohydrate ligands. It may play a role in tumor cell metastasis. It may also function in the protection, maintenance, and adhesion of the lysosome. Alternative splicing of this gene results in multiple transcript variants encoding distinct proteins. [provided by RefSeq, …	hsa04140 (Autophagy - animal), hsa04142 (Lysosome), hsa04145 (Phagosome), hsa05152 (Tuberculosis), GO:0002576 (platelet degranulation), GO:0006605 (protein targeting), GO:0009267 (cellular response to starvation), GO:0017038 (protein import), GO:0031647 (regulation of protein stability), GO:0043312 (neutrophil degranulation), GO:0046716 (muscle cell cellular homeostasis), GO:0050821 (protein stab…			0.289927	0.656764		-0.209984	-0.0374178	-0.173118		-0.265348	-0.0164867	-0.244337					148.193	74.5677	79.6648	-0.638671	5.84484	13.5347	0.00328563	0.0625905	0.000950251	0.119433	0.23887	-0.718132	-0.771743	0.0448173	0.0248737		68.7454	89.2277	48.0276	54.3842	49.3225	46.1442	55.2082	46.8504
ENSG00000133703	KRAS	PC	KRAS proto-oncogene, GTPase	This gene, a Kirsten ras oncogene homolog from the mammalian ras gene family, encodes a protein that is a member of the small GTPase superfamily. A single amino acid substitution is responsible for an activating mutation. The transforming protein that results is implicated in various malignancies, including lung adenocarcinoma, mucinous adenoma, ductal carcinoma of the pancreas and colorectal car…	hsa01521 (EGFR tyrosine kinase inhibitor resistance), hsa01522 (Endocrine resistance), hsa04010 (MAPK signaling pathway), hsa04012 (ErbB signaling pathway), hsa04014 (Ras signaling pathway), hsa04015 (Rap1 signaling pathway), hsa04062 (Chemokine signaling pathway), hsa04068 (FoxO signaling pathway), hsa04071 (Sphingolipid signaling pathway), hsa04072 (Phospholipase D signaling pathway), hsa04137 …			-0.0827611	-0.448245		-0.220275	-0.134112	-0.062722		0.498867	0.257234	0.192013					144.147	43.9573	82.3467	0.6803	4.03619	11.728	0.00521213	0.07631	0.00245711	0.0765781	0.23887	0.818923	0.830829	0.0129004	0.0106199		14.8321	11.0652	13.3018	14.2435	15.0675	23.1898	19.3052	18.3635
ENSG00000151502	VPS26B	PC	VPS26, retromer complex component B		hsa04144 (Endocytosis), GO:0006886 (intracellular protein transport), GO:0016241 (regulation of macroautophagy), GO:0042147 (retrograde transport, endosome to Golgi), GO:0005768 (endosome), GO:0005769 (early endosome), GO:0005770 (late endosome), GO:0005829 (cytosol), GO:0030904 (retromer complex), GO:0030906 (retromer complex, inner shell), GO:0005515 (protein binding), GO:0008565 (protein trans…			0.479232	0.163626		-0.039596	-0.133518	0.0599436		-0.179532	-0.0952123	-0.254943					144.032	57.2071	52.4835	-0.525092	4.77523	11.1845	0.00603496	0.0820154	0.00433214	0.0685251	0.23887	-0.869318	-0.834029	0.00504681	0.0100541		38.1396	30.2527	26.0149	24.2492	28.0161	23.4252	24.9555	22.1304
ENSG00000128829	EIF2AK4	PC	eukaryotic translation initiation factor 2 alpha kinase 4	This gene encodes a member of a family of kinases that phosphorylate the alpha subunit of eukaryotic translation initiation factor-2 (EIF2), resulting in the downregulaton of protein synthesis. The encoded protein responds to amino acid deprivation by binding uncharged transfer RNAs. It may also be activated by glucose deprivation and viral infection. Mutations in this gene have been found in ind…	hsa04140 (Autophagy - animal), hsa04141 (Protein processing in endoplasmic reticulum), hsa05160 (Hepatitis C), hsa05162 (Measles), hsa05164 (Influenza A), hsa05168 (Herpes simplex infection), GO:0002230 (positive regulation of defense response to virus by host), GO:0002250 (adaptive immune response), GO:0002286 (T cell activation involved in immune response), GO:0002821 (positive regulation of ad…			-0.127143	-0.28073		0.0686123	-0.152235	-0.109484		0.276308	0.243702	0.0809697					141.131	71.886	80.7234	0.431033	5.66867	10.7156	0.0068701	0.0866289	0.00650685	0.0621765	0.23887	0.881917	0.862436	0.00376031	0.00585513		45.791	40.9647	52.7362	44.967	46.3796	61.2116	59.7991	53.207
ENSG00000133818	RRAS2	PC	RAS related 2	This gene encodes a member of the R-Ras subfamily of Ras-like small GTPases. The encoded protein associates with the plasma membrane and may function as a signal transducer. This protein may play an important role in activating signal transduction pathways that control cell proliferation. Mutations in this gene are associated with the growth of certain tumors. Pseudogenes of this gene are found o…	hsa04010 (MAPK signaling pathway), hsa04014 (Ras signaling pathway), hsa04024 (cAMP signaling pathway), hsa04072 (Phospholipase D signaling pathway), hsa04137 (Mitophagy - animal), hsa04140 (Autophagy - animal), hsa04218 (Cellular senescence), hsa04371 (Apelin signaling pathway), hsa04625 (C-type lectin receptor signaling pathway), hsa04810 (Regulation of actin cytoskeleton), hsa05205 (Proteoglyc…			0.357872	0.311027		-0.0633277	-0.0757248	-0.134489		-0.263267	-0.140988	0.0088981					138.803	86.6267	32.9775	-0.442455	6.83873	12.2432	0.00455179	0.0724552	0.00291481	0.119433	0.23887	-0.718132	-0.827862	0.0448173	0.0111621		145.378	140.669	108.062	107.12	102.765	93.8186	102.294	113.712
ENSG00000111640	GAPDH	PC	glyceraldehyde-3-phosphate dehydrogenase	This gene encodes a member of the glyceraldehyde-3-phosphate dehydrogenase protein family. The encoded protein has been identified as a moonlighting protein based on its ability to perform mechanistically distinct functions. The product of this gene catalyzes an important energy-yielding step in carbohydrate metabolism, the reversible oxidative phosphorylation of glyceraldehyde-3-phosphate in the…	hsa00010 (Glycolysis / Gluconeogenesis), hsa01100 (Metabolic pathways), hsa01200 (Carbon metabolism), hsa01230 (Biosynthesis of amino acids), hsa04066 (HIF-1 signaling pathway), hsa05010 (Alzheimer disease), GO:0000226 (microtubule cytoskeleton organization), GO:0006094 (gluconeogenesis), GO:0016241 (regulation of macroautophagy), GO:0017148 (negative regulation of translation), GO:0035606 (pepti…			0.0620918	0.355905		0.0704938	0.247309	0.0406907		-0.516265	-0.197237	-0.0629886					134.174	99.7354	40.0618	-0.485599	11.1858	10.4924	0.00731511	0.0886888	0.00422657	0.0765781	0.23887	-0.818923	-0.772562	0.0129004	0.0246234		2396.32	2938.04	2410.33	2724.86	2361	1604.22	2001.74	2197.14
ENSG00000204977	TRIM13	PC	tripartite motif containing 13	This gene encodes a member of the tripartite motif (TRIM) family. The TRIM motif includes three zinc-binding domains, a RING, a B-box type 1 and a B-box type 2, and a coiled-coil region. This gene is located on chromosome 13 within the minimal deletion region for B-cell chronic lymphocytic leukemia. Multiple alternatively spliced transcript variants have been found for this gene. [provided by Ref…	GO:0007165 (signal transduction), GO:0009653 (anatomical structure morphogenesis), GO:0010332 (response to gamma radiation), GO:0010942 (positive regulation of cell death), GO:0016239 (positive regulation of macroautophagy), GO:0030433 (ER-associated ubiquitin-dependent protein catabolic process), GO:0032897 (negative regulation of viral transcription), GO:0043123 (positive regulation of I-kappaB…			0.535481	0.760424		-0.270434	-0.189697	-0.249822		-0.32329	-0.239626	-0.0230367					133.522	47.4682	72.6687	-0.871621	4.22965	13.8256	0.00306078	0.0618186	0.000624893	0.133469	0.23887	-0.566947	-0.7843	0.1428	0.0212057		26.6035	31.4298	14.3612	15.3029	14.5966	13.7726	14.7143	17.4218
ENSG00000132405	TBC1D14	PC	TBC1 domain family member 14		GO:0006886 (intracellular protein transport), GO:0010507 (negative regulation of autophagy), GO:0031338 (regulation of vesicle fusion), GO:0061024 (membrane organization), GO:0071955 (recycling endosome to Golgi transport), GO:0090630 (NA), GO:2000785 (regulation of autophagic vacuole assembly), GO:0005654 (nucleoplasm), GO:0005776 (autophagic vacuole), GO:0005794 (Golgi apparatus), GO:0005829 (c…			-0.592488	-0.346855		0.251885	0.0635775	0.070497		0.25796	0.245785	0.0496379					132.298	69.6366	87.2872	0.63047	5.52301	12.3875	0.00438483	0.0707097	0.00180952	0.133469	0.23887	0.64254	0.824506	0.085764	0.0117962		29.0755	34.8436	53.7956	46.9682	47.2036	54.031	53.5602	46.4973
ENSG00000154803	FLCN	PC	folliculin	This gene is located within the Smith-Magenis syndrome region on chromosome 17. Mutations in this gene are associated with Birt-Hogg-Dube syndrome, which is characterized by fibrofolliculomas, renal tumors, lung cysts, and pneumothorax. Alternative splicing of this gene results in two transcript variants encoding different isoforms. [provided by RefSeq, Jul 2008].	hsa04150 (mTOR signaling pathway), hsa05211 (Renal cell carcinoma), GO:0000122 (negative regulation of transcription from RNA polymerase II promoter), GO:0001701 (in utero embryonic development), GO:0001932 (regulation of protein phosphorylation), GO:0001934 (positive regulation of protein phosphorylation), GO:0007043 (cell-cell junction assembly), GO:0010508 (positive regulation of autophagy), G…			-0.41867	-0.159182		-0.165132	0.0452959	0.0504393		0.237947	0.379548	0.0297545					130.505	60.0035	60.3794	0.538229	4.93504	10.9816	0.00638074	0.0835548	0.00436101	0.15124	0.252534	0.730731	0.834311	0.0394826	0.0100054		21.8949	26.6035	26.4858	30.959	31.0767	35.6676	39.5521	30.6058
ENSG00000106615	RHEB	PC	Ras homolog, mTORC1 binding	This gene is a member of the small GTPase superfamily and encodes a lipid-anchored, cell membrane protein with five repeats of the RAS-related GTP-binding region. This protein is vital in regulation of growth and cell cycle progression due to its role in the insulin/TOR/S6K signaling pathway. The protein has GTPase activity and shuttles between a GDP-bound form and a GTP-bound form, and farnesyla…	hsa04072 (Phospholipase D signaling pathway), hsa04140 (Autophagy - animal), hsa04150 (mTOR signaling pathway), hsa04151 (PI3K-Akt signaling pathway), hsa04152 (AMPK signaling pathway), hsa04211 (Longevity regulating pathway), hsa04218 (Cellular senescence), hsa04714 (Thermogenesis), hsa04910 (Insulin signaling pathway), hsa04919 (Thyroid hormone signaling pathway), hsa05163 (Human cytomegaloviru…			-0.260276	-0.139738		-0.112464	-0.0751266	-0.0336058		0.434187	0.074774	0.11225					129.52	61.6443	20.891	0.454935	5.0245	8.86579	0.0118263	0.113999	0.0113983	0.0439369	0.23887	0.944911	0.790175	0.000400878	0.0196127		26.3681	28.8401	29.4287	30.2527	31.1944	43.9076	33.7841	34.7258
ENSG00000139644	TMBIM6	PC	transmembrane BAX inhibitor motif containing 6		GO:0006914 (autophagy), GO:0006986 (response to unfolded protein), GO:0010523 (negative regulation of calcium ion transport into cytosol), GO:0032091 (negative regulation of protein binding), GO:0032469 (endoplasmic reticulum calcium ion homeostasis), GO:0043066 (negative regulation of apoptotic process), GO:0051025 (negative regulation of immunoglobulin secretion), GO:0060702 (negative regulatio…			0.19402	0.321322		-0.0662636	-0.0602012	-0.0772988		-0.171555	-0.0204237	-0.119599					129.371	98.0152	27.2342	-0.341373	9.26841	10.981	0.00638181	0.0835548	0.00666755	0.119433	0.23887	-0.718132	-0.833711	0.0448173	0.0101096		701.109	765.97	585.042	587.514	580.569	543.724	603.994	563.736
ENSG00000116288	PARK7	PC	Parkinsonism associated deglycase	The product of this gene belongs to the peptidase C56 family of proteins. It acts as a positive regulator of androgen receptor-dependent transcription. It may also function as a redox-sensitive chaperone, as a sensor for oxidative stress, and it apparently protects neurons against oxidative stress and cell death. Defects in this gene are the cause of autosomal recessive early-onset Parkinson dise…	hsa05012 (Parkinson disease), GO:0001933 (negative regulation of protein phosphorylation), GO:0002866 (positive regulation of acute inflammatory response to antigenic stimulus), GO:0006469 (negative regulation of protein kinase activity), GO:0006508 (proteolysis), GO:0006517 (protein deglycosylation), GO:0006914 (autophagy), GO:0006954 (inflammatory response), GO:0007005 (mitochondrion organizati…			-0.119236	-0.208202		0.0553967	-0.0657835	0.0134382		0.170368	0.0979955	0.0560231					126.21	97.68	13.4098	0.268446	9.02666	8.50689	0.0132267	0.120335	0.0224146	0.0439369	0.23887	0.944911	0.901996	0.000400878	0.00218371		478.275	449.552	540.075	496.403	524.537	585.042	556.32	540.31
ENSG00000164305	CASP3	PC	caspase 3	This gene encodes a protein which is a member of the cysteine-aspartic acid protease (caspase) family. Sequential activation of caspases plays a central role in the execution-phase of cell apoptosis. Caspases exist as inactive proenzymes which undergo proteolytic processing at conserved aspartic residues to produce two subunits, large and small, that dimerize to form the active enzyme. This prote…	hsa01524 (Platinum drug resistance), hsa04010 (MAPK signaling pathway), hsa04115 (p53 signaling pathway), hsa04210 (Apoptosis), hsa04215 (Apoptosis - multiple species), hsa04650 (Natural killer cell mediated cytotoxicity), hsa04657 (IL-17 signaling pathway), hsa04668 (TNF signaling pathway), hsa04726 (Serotonergic synapse), hsa04932 (Non-alcoholic fatty liver disease (NAFLD)), hsa04933 (AGE-RAGE …			-0.389398	-0.135634		0.0834353	0.0531318	-0.0637666		0.255953	0.122874	0.0734047					126.155	70.0953	61.8703	0.414258	5.54591	9.08515	0.0110568	0.109181	0.0117877	0.0685251	0.23887	0.869318	0.859472	0.00504681	0.00622728		34.7258	41.7887	48.9693	47.9099	44.0253	55.4436	50.3819	48.6162
ENSG00000188186	LAMTOR4	PC	late endosomal/lysosomal adaptor, MAPK and MTOR activator 4		hsa04150 (mTOR signaling pathway), GO:0007050 (cell cycle arrest), GO:0008361 (regulation of cell size), GO:0016236 (macroautophagy), GO:0032008 (positive regulation of TOR signaling), GO:0043547 (positive regulation of GTPase activity), GO:0061462 (protein localization to lysosome), GO:0071230 (cellular response to amino acid stimulus), GO:0005764 (lysosome), GO:0005765 (lysosomal membrane), GO:…			-0.681869	-0.417741		0.110679	0.234713	0.219012		0.327118	0.178094	0.0299945					122.575	91.2491	5.01985	0.668409	7.39869	12.128	0.00469039	0.0728051	0.0013981	0.133469	0.23887	0.566947	0.776557	0.1428	0.0234246		101.705	122.541	177.631	193.758	191.64	206.707	186.225	167.861
ENSG00000160695	VPS11	PC	VPS11, CORVET/HOPS core subunit	Vesicle mediated protein sorting plays an important role in segregation of intracellular molecules into distinct organelles. Genetic studies in yeast have identified more than 40 vacuolar protein sorting (VPS) genes involved in vesicle transport to vacuoles. This gene encodes the human homolog of yeast class C Vps11 protein. The mammalian class C Vps proteins are predominantly associated with lat…	GO:0006886 (intracellular protein transport), GO:0006904 (vesicle docking involved in exocytosis), GO:0006914 (autophagy), GO:0007032 (endosome organization), GO:0007040 (lysosome organization), GO:0008333 (endosome to lysosome transport), GO:0031647 (regulation of protein stability), GO:0034058 (endosomal vesicle fusion), GO:0035542 (regulation of SNARE complex assembly), GO:1902115 (regulation …			0.139371	0.198535		0.0916154	0.185596	0.0776756		-0.24252	-0.225137	-0.225137					122.058	50.7939	70.1897	-0.462835	4.41918	8.48035	0.0133378	0.120829	0.0149646	0.0601301	0.23887	-0.887214	-0.903087	0.00329023	0.00211338		23.3075	24.3669	22.4835	24.1315	22.2481	17.4218	17.6572	17.6572
ENSG00000109270	LAMTOR3	PC	late endosomal/lysosomal adaptor, MAPK and MTOR activator 3	This gene encodes a scaffold protein that functions in the extracellular signal-regulated kinase (ERK) cascade. The protein is localized to late endosomes by the mitogen-activated protein-binding protein-interacting protein, and binds specifically to MAP kinase kinase MAP2K1/MEK1, MAP kinase MAPK3/ERK1, and MAP kinase MAPK1/ERK2. Studies of the orthologous gene in mouse indicate that it regulates…	hsa04010 (MAPK signaling pathway), hsa04150 (mTOR signaling pathway), GO:0000165 (MAPK cascade), GO:0000186 (activation of MAPKK activity), GO:0007050 (cell cycle arrest), GO:0016236 (macroautophagy), GO:0032008 (positive regulation of TOR signaling), GO:0034613 (cellular protein localization), GO:0043312 (neutrophil degranulation), GO:0043547 (positive regulation of GTPase activity), GO:0071230 …			0.419613	0.282101		0.176485	0.148827	-0.232507		-0.469135	-0.426902	0.101518					119.995	41.699	77.071	-0.670475	3.91337	8.38763	0.0137348	0.122116	0.00818636	0.0685251	0.23887	-0.869318	-0.78809	0.00504681	0.0201692		20.0115	18.0103	16.5978	16.2446	12.0069	9.88803	10.2412	15.6561
ENSG00000055208	TAB2	PC	TGF-beta activated kinase 1 (MAP3K7) binding protein 2	The protein encoded by this gene is an activator of MAP3K7/TAK1, which is required for for the IL-1 induced activation of nuclear factor kappaB and MAPK8/JNK. This protein forms a kinase complex with TRAF6, MAP3K7 and TAB1, and it thus serves as an adaptor that links MAP3K7 and TRAF6. This protein, along with TAB1 and MAP3K7, also participates in the signal transduction induced by TNFSF11/RANKl t…	hsa04010 (MAPK signaling pathway), hsa04064 (NF-kappa B signaling pathway), hsa04380 (Osteoclast differentiation), hsa04620 (Toll-like receptor signaling pathway), hsa04621 (NOD-like receptor signaling pathway), hsa04657 (IL-17 signaling pathway), hsa04668 (TNF signaling pathway), hsa05140 (Leishmaniasis), hsa05145 (Toxoplasmosis), hsa05162 (Measles), hsa05168 (Herpes simplex infection), hsa05169…			0.551211	0.673638		-0.155931	-0.138652	-0.432956		-0.254852	-0.0152629	-0.227194					118.716	50.0706	84.0759	-0.789834	4.37791	11.5439	0.00547511	0.078465	0.00173082	0.133469	0.23887	-0.566947	-0.769176	0.1428	0.0256686		29.8995	32.7247	17.5395	17.7749	14.1258	16.2446	19.5406	16.5978
ENSG00000122958	VPS26A	PC	VPS26, retromer complex component A	This gene belongs to a group of vacuolar protein sorting (VPS) genes. The encoded protein is a component of a large multimeric complex, termed the retromer complex, involved in retrograde transport of proteins from endosomes to the trans-Golgi network. The close structural similarity between the yeast and human proteins that make up this complex suggests a similarity in function. Expression studi…	hsa04144 (Endocytosis), GO:0006886 (intracellular protein transport), GO:0016055 (Wnt signaling pathway), GO:0016241 (regulation of macroautophagy), GO:0042147 (retrograde transport, endosome to Golgi), GO:1990126 (retrograde transport, endosome to plasma membrane), GO:0005764 (lysosome), GO:0005768 (endosome), GO:0005769 (early endosome), GO:0005829 (cytosol), GO:0010008 (endosome membrane), GO:…			-0.420244	0.00861516		-0.0762765	-0.197843	-0.284978		0.558044	0.29813	0.114552					118.072	64.0438	48.3194	0.596293	5.16662	9.13805	0.0108802	0.107812	0.00610857	0.082085	0.23887	0.755929	0.728221	0.0300197	0.0405129		25.5441	35.079	32.9601	30.135	28.2515	52.2653	43.319	37.9041
ENSG00000142875	PRKACB	PC	protein kinase cAMP-activated catalytic subunit beta	The protein encoded by this gene is a member of the serine/threonine protein kinase family. The encoded protein is a catalytic subunit of cAMP (cyclic AMP)-dependent protein kinase, which mediates signalling though cAMP. cAMP signaling is important to a number of processes, including cell proliferaton and differentiation. Multiple alternatively spliced transcript variants encoding distinct isofor…	hsa01522 (Endocrine resistance), hsa04010 (MAPK signaling pathway), hsa04014 (Ras signaling pathway), hsa04020 (Calcium signaling pathway), hsa04024 (cAMP signaling pathway), hsa04062 (Chemokine signaling pathway), hsa04114 (Oocyte meiosis), hsa04140 (Autophagy - animal), hsa04211 (Longevity regulating pathway), hsa04213 (Longevity regulating pathway - multiple species), hsa04261 (Adrenergic sign…			0.257184	1.11637		-0.688055	0.000822812	-0.0675705		-0.110219	-0.246294	-0.262238					117.582	34.933	81.8968	-1.05411	3.56082	9.45435	0.00989108	0.103114	0.00341368	0.119433	0.23887	-0.718132	-0.660766	0.0448173	0.074451		13.184	25.5441	5.88573	10.712	10.1235	9.77032	8.71089	8.59317
ENSG00000107643	MAPK8	PC	mitogen-activated protein kinase 8	The protein encoded by this gene is a member of the MAP kinase family. MAP kinases act as an integration point for multiple biochemical signals, and are involved in a wide variety of cellular processes such as proliferation, differentiation, transcription regulation and development. This kinase is activated by various cell stimuli, and targets specific transcription factors, and thus mediates imm…	hsa01522 (Endocrine resistance), hsa04010 (MAPK signaling pathway), hsa04012 (ErbB signaling pathway), hsa04014 (Ras signaling pathway), hsa04024 (cAMP signaling pathway), hsa04068 (FoxO signaling pathway), hsa04071 (Sphingolipid signaling pathway), hsa04137 (Mitophagy - animal), hsa04140 (Autophagy - animal), hsa04141 (Protein processing in endoplasmic reticulum), hsa04210 (Apoptosis), hsa04215 …			0.393595	0.354063		-0.271612	0.122715	-0.043314		-0.152952	-0.211063	-0.191431					116.3	25.6793	88.3811	-0.669898	3.05802	9.29179	0.0103855	0.105398	0.00642021	0.119433	0.23887	-0.718132	-0.865634	0.0448173	0.00546996		11.0652	10.712	6.23888	8.8286	7.65146	6.94517	6.59202	6.70974
ENSG00000148572	NRBF2	PC	nuclear receptor binding factor 2		hsa04140 (Autophagy - animal), GO:0006355 (regulation of transcription, DNA-templated), GO:0006367 (transcription initiation from RNA polymerase II promoter), GO:0006914 (autophagy), GO:0034976 (response to endoplasmic reticulum stress), GO:0043550 (regulation of lipid kinase activity), GO:0005654 (nucleoplasm), GO:0005737 (cytoplasm), GO:0005776 (autophagic vacuole), GO:0031410 (cytoplasmic vesi…			0.662135	0.392938		-0.128725	-0.268009	-0.146537		-0.411383	-0.146537	0.0461186					113.661	48.9414	67.9577	-0.712	4.3089	10.212	0.00792345	0.0920555	0.00349371	0.132113	0.23887	-0.608375	-0.756749	0.109509	0.0297381		31.1944	25.5441	17.1863	15.4206	16.9509	13.7726	16.9509	19.6584
ENSG00000126247	CAPNS1	PC	calpain small subunit 1	This gene is a member of the calpain small subunit family. Calpains are calcium-dependent cysteine proteinases that are widely distributed in mammalian cells. Calpains operate as heterodimers, comprising a specific large catalytic subunit (calpain 1 subunit in Calpain I, and calpain 2 subunit in Calpain II), and a common small regulatory subunit encoded by this gene. This encoded protein is essen…	GO:0006508 (proteolysis), GO:0008284 (positive regulation of cell proliferation), GO:0016241 (regulation of macroautophagy), GO:0022617 (extracellular matrix disassembly), GO:0070268 (cornification), GO:0005829 (cytosol), GO:0005886 (plasma membrane), GO:0016020 (membrane), GO:0070062 (extracellular vesicular exosome), GO:0004175 (endopeptidase activity), GO:0004198 (calcium-dependent cysteine-ty…			0.0676859	0.281007		-0.00919256	0.050555	-0.0469616		-0.220893	-0.113347	-0.0088537					110.648	98.8973	19.9735	-0.285372	9.98227	7.92029	0.0159628	0.132761	0.0222559	0.0956344	0.23887	-0.793725	-0.803886	0.0186875	0.016192		1055.08	1223.53	1000.22	1042.6	974.325	863.437	930.417	1000.46
ENSG00000165280	VCP	PC	valosin containing protein	The protein encoded by this gene is a member of a family that includes putative ATP-binding proteins involved in vesicle transport and fusion, 26S proteasome function, and assembly of peroxisomes. This protein, as a structural protein, is associated with clathrin, and heat-shock protein Hsc70, to form a complex. It has been implicated in a number of cellular events that are regulated during mitos…	hsa04141 (Protein processing in endoplasmic reticulum), hsa05134 (Legionellosis), GO:0006281 (DNA repair), GO:0006302 (double-strand break repair), GO:0006457 (protein folding), GO:0006479 (protein methylation), GO:0006734 (NADH metabolic process), GO:0006888 (ER to Golgi vesicle-mediated transport), GO:0006914 (autophagy), GO:0006919 (activation of cysteine-type endopeptidase activity involved i…			-0.158024	-0.198294		0.0139799	0.036464	0.0270135		0.120716	0.141147	0.0169981					110.557	96.1009	56.9916	0.26279	8.3804	7.90985	0.0160172	0.132929	0.0277346	0.0956344	0.23887	0.793725	0.904316	0.0186875	0.00203589		297.347	289.107	335.251	340.549	338.312	361.149	366.328	335.958
ENSG00000157954	WIPI2	PC	WD repeat domain, phosphoinositide interacting 2	WD40 repeat proteins are key components of many essential biologic functions. They regulate the assembly of multiprotein complexes by presenting a beta-propeller platform for simultaneous and reversible protein-protein interactions. Members of the WIPI subfamily of WD40 repeat proteins, such as WIPI2, have a 7-bladed propeller structure and contain a conserved motif for interaction with phospholi…	hsa04136 (Autophagy - other), hsa04140 (Autophagy - animal), GO:0000045 (autophagic vacuole assembly), GO:0016236 (macroautophagy), GO:0000407 (pre-autophagosomal structure), GO:0005829 (cytosol), GO:0016020 (membrane), GO:0034045 (pre-autophagosomal structure membrane), GO:0043234 (protein complex), GO:0005515 (protein binding), GO:0032266 (phosphatidylinositol-3-phosphate binding), GO:0080025 (…			-0.334874	-0.116431		-0.0810954	0.0521812	-0.0810954		0.231517	0.277616	0.0521812					109.864	39.2025	59.3207	0.477265	3.78681	6.95234	0.0221023	0.152869	0.0236376	0.0518526	0.23887	0.91811	0.870742	0.00128992	0.0048891		10.2412	12.2423	12.5955	14.008	12.5955	16.1269	16.7155	14.008
ENSG00000145675	PIK3R1	PC	phosphoinositide-3-kinase regulatory subunit 1	Phosphatidylinositol 3-kinase phosphorylates the inositol ring of phosphatidylinositol at the 3-prime position. The enzyme comprises a 110 kD catalytic subunit and a regulatory subunit of either 85, 55, or 50 kD. This gene encodes the 85 kD regulatory subunit. Phosphatidylinositol 3-kinase plays an important role in the metabolic actions of insulin, and a mutation in this gene has been associated…	hsa01521 (EGFR tyrosine kinase inhibitor resistance), hsa01522 (Endocrine resistance), hsa01524 (Platinum drug resistance), hsa04012 (ErbB signaling pathway), hsa04014 (Ras signaling pathway), hsa04015 (Rap1 signaling pathway), hsa04024 (cAMP signaling pathway), hsa04062 (Chemokine signaling pathway), hsa04066 (HIF-1 signaling pathway), hsa04068 (FoxO signaling pathway), hsa04070 (Phosphatidylino…			0.850402	0.535856		-0.22611	-0.357384	-0.257826		0.204603	-0.392157	-0.357384					108.223	11.6796	67.9312	-1.1302	2.29274	8.60965	0.0128066	0.118144	0.00511244	0.12489	0.23887	-0.684422	-0.712056	0.0611479	0.0475378		9.41718	7.1806	3.41373	2.94287	3.29601	5.29716	2.82515	2.94287
ENSG00000089063	TMEM230	PC	transmembrane protein 230		GO:0048489 (synaptic vesicle transport), GO:0005769 (early endosome), GO:0005770 (late endosome), GO:0005776 (autophagic vacuole), GO:0005783 (endoplasmic reticulum), GO:0005802 (trans-Golgi network), GO:0008021 (synaptic vesicle), GO:0016021 (integral component of membrane), GO:0030054 (cell junction), GO:0055037 (recycling endosome)			0.548722	0.876579		-0.453278	-0.137697	-0.331713		-0.236553	-0.0632176	-0.202843					108.036	75.3617	46.749	-0.847325	5.90418	12.6774	0.00407074	0.0679615	0.000762309	0.0956344	0.23887	-0.415761	-0.737741	0.305624	0.0366905		83.8129	105.708	40.847	51.3236	44.6139	47.7922	54.1488	48.9693
ENSG00000138279	ANXA7	PC	annexin A7	Annexin VII is a member of the annexin family of calcium-dependent phospholipid binding proteins.The Annexin VII gene contains 14 exons and spans approximately 34 kb of DNA. An alternatively spliced cassette exon results in two mRNA transcripts of 2.0 and 2.4 kb which are predicted to generate two protein isoforms differing in their N-terminal domain. The alternative splicing event is tissue spec…	GO:0006874 (cellular calcium ion homeostasis), GO:0006914 (autophagy), GO:0007599 (hemostasis), GO:0008283 (cell proliferation), GO:0008360 (regulation of cell shape), GO:0009651 (response to salt stress), GO:0009992 (cellular water homeostasis), GO:0010629 (negative regulation of gene expression), GO:0014070 (response to organic cyclic compound), GO:0030855 (epithelial cell differentiation), GO:…			-0.280373	-0.0666342		-0.15044	-0.0060467	0.058085		0.224358	0.142207	0.0788439					106.772	72.9005	46.652	0.334741	5.73195	6.85624	0.0228535	0.155038	0.0308258	0.0621765	0.23887	0.881917	0.837179	0.00376031	0.00951639		42.9659	50.1465	47.2036	52.383	54.855	61.8002	58.2688	55.6791
ENSG00000126458	RRAS	PC	RAS related		hsa04010 (MAPK signaling pathway), hsa04014 (Ras signaling pathway), hsa04015 (Rap1 signaling pathway), hsa04024 (cAMP signaling pathway), hsa04072 (Phospholipase D signaling pathway), hsa04137 (Mitophagy - animal), hsa04140 (Autophagy - animal), hsa04218 (Cellular senescence), hsa04360 (Axon guidance), hsa04371 (Apelin signaling pathway), hsa04625 (C-type lectin receptor signaling pathway), hsa0…			0.0906149	0.206197		-0.0232868	0.00854962	0.00568426		-0.116983	-0.134261	-0.036516					103.049	86.8296	14.5743	-0.244428	6.8641	6.10142	0.0299438	0.176701	0.0527092	0.0439369	0.23887	-0.944911	-0.905267	0.000400878	0.00197729		123.6	134.077	114.066	116.655	116.42	106.767	105.472	113.006
ENSG00000147457	CHMP7	PC	charged multivesicular body protein 7		hsa04144 (Endocytosis), hsa04217 (Necroptosis), GO:0000920 (cytokinetic cell separation), GO:0006997 (nucleus organization), GO:0007080 (mitotic metaphase plate congression), GO:0010458 (exit from mitosis), GO:0015031 (protein transport), GO:0016197 (endosomal transport), GO:0019058 (viral life cycle), GO:0031468 (nuclear envelope reassembly), GO:0036258 (multivesicular body assembly), GO:0039702…			-0.431848	-0.248535		0.128093	0.0569125	0.134393		0.073401	0.210907	0.0766762					102.949	70.801	60.1235	0.439763	5.58314	8.35984	0.0138565	0.122909	0.0133907	0.133469	0.23887	0.64254	0.808485	0.085764	0.0151351		34.4904	39.4344	51.7945	49.2047	52.0299	49.7933	54.9728	49.911
ENSG00000132109	TRIM21	PC	tripartite motif containing 21	This gene encodes a member of the tripartite motif (TRIM) family. The TRIM motif includes three zinc-binding domains, a RING, a B-box type 1 and a B-box type 2, and a coiled-coil region. The encoded protein is part of the RoSSA ribonucleoprotein, which includes a single polypeptide and one of four small RNA molecules. The RoSSA particle localizes to both the cytoplasm and the nucleus. RoSSA inter…	hsa05322 (Systemic lupus erythematosus), GO:0000209 (protein polyubiquitination), GO:0006513 (protein monoubiquitination), GO:0007049 (cell cycle), GO:0010508 (positive regulation of autophagy), GO:0016567 (protein ubiquitination), GO:0031648 (protein destabilization), GO:0032088 (negative regulation of NF-kappaB transcription factor activity), GO:0032479 (regulation of type I interferon producti…			0.394376	0.073615		-0.0238231	0.073615	-0.0112773		-0.197699	-0.316146	0.00733912					101.235	55.6987	43.2642	-0.432569	4.69473	7.04731	0.0213886	0.150483	0.0227509	0.119313	0.23887	-0.766806	-0.790176	0.0264163	0.0196126		34.0195	26.839	24.9555	26.839	25.1909	21.8949	20.0115	25.5441
ENSG00000040633	PHF23	PC	PHD finger protein 23		GO:0006914 (autophagy), GO:0031398 (positive regulation of protein ubiquitination), GO:1901097 (negative regulation of autophagic vacuole maturation), GO:1902902 (negative regulation of autophagic vacuole assembly), GO:0005654 (nucleoplasm), GO:0005737 (cytoplasm), GO:0005515 (protein binding), GO:0008270 (zinc ion binding)			-0.0724146	-0.207995		0.0388226	-0.211023	-0.0157242		0.177255	0.163293	0.127786					101.142	76.4908	23.6348	0.315058	5.98684	6.6648	0.0244426	0.159279	0.0340797	0.0765781	0.23887	0.818923	0.836799	0.0129004	0.00958033		59.6814	54.1488	64.6254	54.031	62.1534	71.3351	70.6288	68.8631
ENSG00000173726	TOMM20	PC	translocase of outer mitochondrial membrane 20		GO:0006626 (protein targeting to mitochondrion), GO:0016031 (tRNA import into mitochondrion), GO:0016236 (macroautophagy), GO:0016579 (protein deubiquitination), GO:0030150 (protein import into mitochondrial matrix), GO:0070096 (mitochondrial outer membrane translocase complex assembly), GO:0005739 (mitochondrion), GO:0005741 (mitochondrial outer membrane), GO:0005742 (mitochondrial outer membran…			0.70907	0.905084		-0.36404	-0.351933	-0.41351		-0.0882221	-0.03241	-0.36404					99.1377	73.7562	46.9166	-0.918838	5.79792	11.8972	0.00498357	0.0747675	0.000990164	0.0796494	0.23887	-0.380235	-0.733035	0.352797	0.0385511		86.1672	98.9981	39.9053	40.2584	38.4927	48.7339	50.735	39.9053
ENSG00000082701	GSK3B	PC	glycogen synthase kinase 3 beta	The protein encoded by this gene is a serine-threonine kinase, belonging to the glycogen synthase kinase subfamily. It is involved in energy metabolism, neuronal cell development, and body pattern formation. Polymorphisms in this gene have been implicated in modifying risk of Parkinson disease, and studies in mice show that overexpression of this gene may be relevant to the pathogenesis of Alzhei…	hsa01521 (EGFR tyrosine kinase inhibitor resistance), hsa04012 (ErbB signaling pathway), hsa04062 (Chemokine signaling pathway), hsa04110 (Cell cycle), hsa04150 (mTOR signaling pathway), hsa04151 (PI3K-Akt signaling pathway), hsa04310 (Wnt signaling pathway), hsa04340 (Hedgehog signaling pathway), hsa04360 (Axon guidance), hsa04390 (Hippo signaling pathway), hsa04510 (Focal adhesion), hsa04550 (S…			-0.286272	-0.140392		-0.140392	0.113408	-0.168412		0.136495	0.34907	0.136495					95.1314	12.5265	85.2139	0.61533	2.33543	5.76751	0.0339032	0.189417	0.0304648	0.0658065	0.23887	0.860729	0.826494	0.00606768	0.0114178		3.53144	4.12001	4.12001	5.29716	4.0023	5.41488	6.59202	5.41488
ENSG00000131791	PRKAB2	PC	protein kinase AMP-activated non-catalytic subunit beta 2	The protein encoded by this gene is a regulatory subunit of the AMP-activated protein kinase (AMPK). AMPK is a heterotrimer consisting of an alpha catalytic subunit, and non-catalytic beta and gamma subunits. AMPK is an important energy-sensing enzyme that monitors cellular energy status. In response to cellular metabolic stresses, AMPK is activated, and thus phosphorylates and inactivates acetyl…	hsa04068 (FoxO signaling pathway), hsa04152 (AMPK signaling pathway), hsa04211 (Longevity regulating pathway), hsa04213 (Longevity regulating pathway - multiple species), hsa04371 (Apelin signaling pathway), hsa04530 (Tight junction), hsa04710 (Circadian rhythm), hsa04714 (Thermogenesis), hsa04910 (Insulin signaling pathway), hsa04920 (Adipocytokine signaling pathway), hsa04921 (Oxytocin signalin…			0.152902	0.716853		-0.326326	0.105069	-0.0487544		-0.0487544	-0.0131262	-0.537864					93.0089	25.4587	78.5179	-0.765332	3.04779	6.73	0.0238871	0.158636	0.0154911	0.12489	0.23887	-0.684422	-0.686225	0.0611479	0.0601971		8.8286	14.008	5.76802	8.47546	7.41603	7.41603	7.65146	4.70859
ENSG00000069869	NEDD4	PC	neural precursor cell expressed, developmentally down-regulated 4, E3 ubiquitin protein ligase		hsa04120 (Ubiquitin mediated proteolysis), hsa04144 (Endocytosis), hsa04530 (Tight junction), hsa05169 (Epstein-Barr virus infection), GO:0002250 (adaptive immune response), GO:0003151 (outflow tract morphogenesis), GO:0003197 (endocardial cushion development), GO:0006513 (protein monoubiquitination), GO:0006622 (protein targeting to lysosome), GO:0007041 (lysosomal transport), GO:0007528 (neurom…			0.336542	0.147194		-0.138905	0.0750421	-0.0708136		-0.0354381	-0.0862442	-0.227377					91.7126	62.2442	93.9479	-0.364275	5.0593	6.31677	0.0276823	0.170177	0.0336783	0.119433	0.23887	-0.718132	-0.794722	0.0448173	0.0184328		42.0241	36.6093	29.6641	34.7258	31.1944	32.0184	30.8413	27.7807
ENSG00000155506	LARP1	PC	La ribonucleoprotein domain family member 1		GO:0006413 (translational initiation), GO:0008283 (cell proliferation), GO:0016239 (positive regulation of macroautophagy), GO:0017148 (negative regulation of translation), GO:0031929 (TOR signaling), GO:0038202 (TORC1 signaling), GO:0045070 (positive regulation of viral genome replication), GO:0045727 (positive regulation of translation), GO:0048255 (mRNA stabilization), GO:0072752 (cellular res…			-0.0462921	-0.186075		-0.000646292	-0.0378847	-0.0104829		0.173087	0.0718426	0.0364515					90.7536	92.9164	37.9797	0.212501	7.69124	4.90671	0.0473913	0.223275	0.0813393	0.0439369	0.23887	0.944911	0.84807	0.000400878	0.00779871		199.409	180.81	205.883	200.586	204.47	232.487	216.595	211.298
ENSG00000156469	MTERF3	PC	mitochondrial transcription termination factor 3		GO:0006351 (transcription, DNA-templated), GO:0008380 (RNA splicing), GO:0016236 (macroautophagy), GO:0032502 (developmental process), GO:0042255 (ribosome assembly), GO:0045892 (negative regulation of transcription, DNA-templated), GO:0005654 (nucleoplasm), GO:0005739 (mitochondrion), GO:0005741 (mitochondrial outer membrane), GO:0003690 (double-stranded DNA binding), GO:0003727 (single-stranded…			0.50346	0.719194		-0.450771	-0.254365	-0.159203		0.183461	-0.280838	-0.260938					90.4744	59.8359	26.8372	-0.697814	4.92459	7.50681	0.0182991	0.140923	0.00991254	0.133469	0.23887	-0.566947	-0.678771	0.1428	0.0641854		41.7887	48.8516	20.6001	23.8961	25.6618	33.0778	23.4252	23.7784
ENSG00000104695	PPP2CB	PC	protein phosphatase 2 catalytic subunit beta	This gene encodes the phosphatase 2A catalytic subunit. Protein phosphatase 2A is one of the four major Ser/Thr phosphatases, and it is implicated in the negative control of cell growth and division. It consists of a common heteromeric core enzyme, which is composed of a catalytic subunit and a constant regulatory subunit, that associates with a variety of regulatory subunits. This gene encodes a…	hsa03015 (mRNA surveillance pathway), hsa04071 (Sphingolipid signaling pathway), hsa04114 (Oocyte meiosis), hsa04136 (Autophagy - other), hsa04140 (Autophagy - animal), hsa04151 (PI3K-Akt signaling pathway), hsa04152 (AMPK signaling pathway), hsa04261 (Adrenergic signaling in cardiomyocytes), hsa04350 (TGF-beta signaling pathway), hsa04390 (Hippo signaling pathway), hsa04530 (Tight junction), hsa…			0.104661	0.519113		-0.136781	-0.136781	-0.0420985		-0.0110153	-0.188008	-0.109089					87.1867	77.223	11.9188	-0.409636	6.04039	7.03103	0.021509	0.150847	0.0198376	0.130269	0.23887	-0.570352	-0.683409	0.139877	0.0616862		69.8048	93.7009	58.7396	58.7396	62.8596	64.2722	56.6208	59.9168
ENSG00000165861	ZFYVE1	PC	zinc finger FYVE-type containing 1	The FYVE domain mediates the recruitment of proteins involved in membrane trafficking and cell signaling to phosphatidylinositol 3-phosphate-containing membranes. This protein contains two zinc-binding FYVE domains in tandem and is reported to localize to the Golgi apparatus. Alternative splicing results in multiple transcript variants. [provided by RefSeq, Aug 2013].	hsa04140 (Autophagy - animal), GO:0009267 (cellular response to starvation), GO:0010923 (negative regulation of phosphatase activity), GO:0016236 (macroautophagy), GO:0000407 (pre-autophagosomal structure), GO:0005776 (autophagic vacuole), GO:0005783 (endoplasmic reticulum), GO:0005795 (Golgi stack), GO:0016020 (membrane), GO:0044233 (ER-mitochondrion membrane contact site), GO:0048471 (perinucle…			-0.093659	-0.581646		0.105261	0.0942889	-0.0084047		0.270332	0.270332	-0.0565029					84.8819	37.3412	70.0044	0.537624	3.68815	5.51328	0.0373424	0.199016	0.033894	0.116414	0.23887	0.722446	0.746684	0.0429448	0.033308		11.536	7.65146	13.5372	13.4195	12.36	15.4206	15.4206	11.8892
ENSG00000163565	IFI16	PC	interferon gamma inducible protein 16	This gene encodes a member of the HIN-200 (hematopoietic interferon-inducible nuclear antigens with 200 amino acid repeats) family of cytokines. The encoded protein contains domains involved in DNA binding, transcriptional regulation, and protein-protein interactions. The protein localizes to the nucleoplasm and nucleoli, and interacts with p53 and retinoblastoma-1. It modulates p53 function, and…	hsa04621 (NOD-like receptor signaling pathway), GO:0000122 (negative regulation of transcription from RNA polymerase II promoter), GO:0001819 (positive regulation of cytokine production), GO:0002218 (activation of innate immune response), GO:0006351 (transcription, DNA-templated), GO:0006914 (autophagy), GO:0006954 (inflammatory response), GO:0008283 (cell proliferation), GO:0010506 (regulation o…			0.20898	0.339277		0.0536363	-0.079927	-0.241964		-0.172816	0.0167202	-0.123906					84.7666	72.6094	76.3123	-0.354878	5.71588	6.07609	0.0302241	0.1778	0.0341027	0.133469	0.23887	-0.64254	-0.737021	0.085764	0.0369718		60.2699	66.1557	53.9133	48.9693	43.5544	45.791	52.5008	47.439
ENSG00000131943	C19orf12	PC	chromosome 19 open reading frame 12	This gene encodes a small transmembrane protein. Mutations in this gene are a cause of neurodegeneration with brain iron accumulation-4 (NBIA4), but the specific function of the encoded protein is unknown. Alternatively spliced transcript variants encoding multiple isoforms have been observed for this gene. [provided by RefSeq, Dec 2011].	GO:0006914 (autophagy), GO:0006915 (apoptotic process), GO:0006979 (response to oxidative stress), GO:0051560 (mitochondrial calcium ion homeostasis), GO:0005739 (mitochondrion), GO:0005783 (endoplasmic reticulum), GO:0005829 (cytosol), GO:0016021 (integral component of membrane), GO:0031966 (mitochondrial membrane)			-0.0980148	-0.192142		-0.0904412	0.0463822	-0.241613		0.43544	0.0803311	0.0600578					84.1445	52.0819	72.7658	0.398637	4.48607	4.87194	0.0480602	0.224757	0.0544581	0.0765781	0.23887	0.818923	0.681277	0.0129004	0.0628277		20.3646	18.9521	20.4824	22.7189	18.2458	30.3704	23.3075	22.9544
ENSG00000197746	PSAP	PC	prosaposin	This gene encodes a highly conserved glycoprotein which is a precursor for 4 cleavage products: saposins A, B, C, and D. Each domain of the precursor protein is approximately 80 amino acid residues long with nearly identical placement of cysteine residues and glycosylation sites. Saposins A-D localize primarily to the lysosomal compartment where they facilitate the catabolism of glycosphingolipid…	hsa04142 (Lysosome), GO:0002576 (platelet degranulation), GO:0006687 (glycosphingolipid metabolic process), GO:0006869 (lipid transport), GO:0007193 (adenylate cyclase-inhibiting G-protein coupled receptor signaling pathway), GO:0010506 (regulation of autophagy), GO:0019216 (regulation of lipid metabolic process), GO:0043085 (positive regulation of catalytic activity), GO:0043312 (neutrophil degr…			-0.466925	-0.204688		0.112598	0.0516713	0.21474		0.158683	0.111314	0.0226067					82.4781	94.2219	54.4243	0.390284	7.94015	7.25397	0.0199281	0.145557	0.0184739	0.119433	0.23887	0.491354	0.721591	0.216255	0.0433118		175.159	210.474	262.739	251.792	282.162	271.332	262.504	246.73
ENSG00000100554	ATP6V1D	PC	ATPase H+ transporting V1 subunit D	This gene encodes a component of vacuolar ATPase (V-ATPase), a multisubunit enzyme that mediates acidification of eukaryotic intracellular organelles. V-ATPase dependent organelle acidification is necessary for such intracellular processes as protein sorting, zymogen activation, receptor-mediated endocytosis, and synaptic vesicle proton gradient generation. V-ATPase is composed of a cytosolic V1 …	hsa00190 (Oxidative phosphorylation), hsa01100 (Metabolic pathways), hsa04145 (Phagosome), hsa04150 (mTOR signaling pathway), hsa04721 (Synaptic vesicle cycle), hsa04966 (Collecting duct acid secretion), hsa05110 (Vibrio cholerae infection), hsa05120 (Epithelial cell signaling in Helicobacter pylori infection), hsa05165 (Human papillomavirus infection), hsa05323 (Rheumatoid arthritis), GO:0008286…			0.678504	0.363498		-0.213693	-0.202105	-0.325989		0.00346868	-0.286995	-0.0166893					82.285	87.2089	15.73	-0.574169	6.9079	8.27451	0.0142384	0.12493	0.00734229	0.0956344	0.23887	-0.415761	-0.677296	0.305624	0.064993		187.637	150.439	100.175	100.999	92.5238	116.773	95.1135	115.125
ENSG00000171055	FEZ2	PC	fasciculation and elongation protein zeta 2	This gene is an ortholog of the C. elegans unc-76 gene, which is necessary for normal axonal bundling and elongation within axon bundles. Other orthologs include the rat gene that encodes zygin II, which can bind to synaptotagmin. [provided by RefSeq, Jul 2008].	GO:0007165 (signal transduction), GO:0007399 (nervous system development), GO:0007411 (axon guidance), GO:1902902 (negative regulation of autophagic vacuole assembly), GO:0005737 (cytoplasm), GO:0030424 (axon), GO:0005515 (protein binding)			0.312278	0.177651		0.135687	-0.191894	-0.139426		-0.1455	-0.220464	0.071669					80.0075	75.5205	50.3308	-0.330524	5.91829	5.00356	0.0455865	0.219715	0.0523505	0.119433	0.23887	-0.718132	-0.685968	0.0448173	0.0603322		74.6311	67.8037	65.8025	52.0299	54.031	53.7956	50.9705	62.8596
ENSG00000078142	PIK3C3	PC	phosphatidylinositol 3-kinase catalytic subunit type 3		hsa00562 (Inositol phosphate metabolism), hsa01100 (Metabolic pathways), hsa04070 (Phosphatidylinositol signaling system), hsa04136 (Autophagy - other), hsa04140 (Autophagy - animal), hsa04145 (Phagosome), hsa04371 (Apelin signaling pathway), hsa05152 (Tuberculosis), hsa05167 (Kaposi sarcoma-associated herpesvirus infection), GO:0000910 (cytokinesis), GO:0006468 (protein phosphorylation), GO:0006…			0.222705	0.222705		-0.0321865	-0.046194	0.0816866		-0.350651	0.119823	-0.217888					79.7593	53.1228	74.6537	-0.382537	4.54636	4.95057	0.0465635	0.221411	0.0533404	0.116414	0.23887	-0.722446	-0.757825	0.0429448	0.0293711		27.0744	27.0744	22.3658	22.1304	24.3669	17.5395	25.0732	19.4229
ENSG00000108443	RPS6KB1	PC	ribosomal protein S6 kinase B1	This gene encodes a member of the ribosomal S6 kinase family of serine/threonine kinases. The encoded protein responds to mTOR (mammalian target of rapamycin) signaling to promote protein synthesis, cell growth, and cell proliferation. Activity of this gene has been associated with human cancer. Alternatively spliced transcript variants have been observed. The use of alternative translation start…	hsa01521 (EGFR tyrosine kinase inhibitor resistance), hsa01522 (Endocrine resistance), hsa04012 (ErbB signaling pathway), hsa04066 (HIF-1 signaling pathway), hsa04140 (Autophagy - animal), hsa04150 (mTOR signaling pathway), hsa04151 (PI3K-Akt signaling pathway), hsa04152 (AMPK signaling pathway), hsa04211 (Longevity regulating pathway), hsa04213 (Longevity regulating pathway - multiple species), …			0.203348	0.437451		-0.259853	0.118682	0.126587		-0.323052	-0.506512	0.203348					78.7992	46.9301	68.2135	-0.545584	4.20108	5.29389	0.0406507	0.20842	0.0343356	0.167185	0.276552	-0.652736	-0.679322	0.07932	0.0638858		20.7178	24.7201	14.4789	19.4229	19.5406	13.7726	11.8892	20.7178
ENSG00000057663	ATG5	PC	autophagy related 5		hsa04136 (Autophagy - other), hsa04137 (Mitophagy - animal), hsa04140 (Autophagy - animal), hsa04211 (Longevity regulating pathway), hsa04213 (Longevity regulating pathway - multiple species), hsa04216 (Ferroptosis), hsa04621 (NOD-like receptor signaling pathway), hsa04622 (RIG-I-like receptor signaling pathway), hsa05131 (Shigellosis), GO:0000045 (autophagic vacuole assembly), GO:0000422 (mitoch…			0.0547785	0.621213		-0.219453	0.0822644	-0.0911012		-0.288182	-0.186279	0.0267588					78.5047	8.13338	79.6118	-0.721658	2.08329	5.24313	0.0414656	0.210233	0.0339101	0.199666	0.31515	-0.655138	-0.660609	0.0778443	0.0745441		4.12001	7.06288	3.06058	4.23773	3.53144	2.82515	3.1783	4.0023
ENSG00000170315	UBB	PC	ubiquitin B	This gene encodes ubiquitin, one of the most conserved proteins known. Ubiquitin has a major role in targeting cellular proteins for degradation by the 26S proteosome. It is also involved in the maintenance of chromatin structure, the regulation of gene expression, and the stress response. Ubiquitin is synthesized as a precursor protein consisting of either polyubiquitin chains or a single ubiqui…	hsa04137 (Mitophagy - animal), hsa04144 (Endocytosis), hsa05012 (Parkinson disease), hsa05167 (Kaposi sarcoma-associated herpesvirus infection), GO:0000086 (G2/M transition of mitotic cell cycle), GO:0000122 (negative regulation of transcription from RNA polymerase II promoter), GO:0000165 (MAPK cascade), GO:0000187 (activation of MAPK activity), GO:0000209 (protein polyubiquitination), GO:000071…			-0.158057	-0.398538		0.151925	0.0285908	0.127333		0.125944	0.0393865	0.0834164					78.293	98.4827	12.4835	0.324595	9.62091	6.65753	0.0245055	0.15956	0.0278733	0.119433	0.23887	0.491354	0.73063	0.216255	0.0395239		700.285	592.458	868.617	797.282	853.902	853.078	803.285	828.241
ENSG00000168502	MTCL1	PC	microtubule crosslinking factor 1		GO:0001578 (microtubule bundle formation), GO:0010506 (regulation of autophagy), GO:0045197 (establishment or maintenance of epithelial cell apical/basal polarity), GO:0090314 (positive regulation of protein targeting to membrane), GO:2000576 (positive regulation of microtubule motor activity), GO:0000922 (spindle pole), GO:0005615 (extracellular space), GO:0005737 (cytoplasm), GO:0005856 (cytosk…			0.306904	0.429081		-0.183927	-0.155911	-0.083757		-0.202912	0.202563	-0.312041					78.0974	47.8917	83.6259	-0.46255	4.24987	4.79634	0.0495538	0.229002	0.0476227	0.119433	0.23887	-0.718132	-0.663227	0.0448173	0.0729949		23.3075	25.5441	16.0092	16.3623	17.3041	15.7738	21.5418	14.4789
ENSG00000115839	RAB3GAP1	PC	RAB3 GTPase activating protein catalytic subunit 1	This gene encodes the catalytic subunit of a Rab GTPase activating protein. The encoded protein forms a heterodimer with a non-catalytic subunit to specifically regulate the activity of members of the Rab3 subfamily of small G proteins. This protein mediates the hydrolysis of GTP bound Rab3 to the GDP bound form. Mutations in this gene are associated with Warburg micro syndrome. Alternate splicin…	GO:0007420 (brain development), GO:0010628 (positive regulation of gene expression), GO:0021854 (hypothalamus development), GO:0034389 (lipid particle organization), GO:0043010 (camera-type eye development), GO:0043087 (regulation of GTPase activity), GO:0043547 (positive regulation of GTPase activity), GO:0048172 (regulation of short-term neuronal synaptic plasticity), GO:0060079 (regulation of …			-0.146631	-0.308395		0.0281555	0.047393	-0.0210913		0.300856	0.192701	-0.0929892					77.5119	42.5371	84.9052	0.405669	3.96049	4.73324	0.0508437	0.232405	0.0607948	0.119433	0.23887	0.718132	0.758458	0.0448173	0.0291566		13.5372	11.8892	15.5383	15.7738	14.9498	19.1875	17.6572	14.1258
ENSG00000092108	SCFD1	PC	sec1 family domain containing 1		GO:0000902 (cell morphogenesis), GO:0001666 (response to hypoxia), GO:0006890 (retrograde vesicle-mediated transport, Golgi to ER), GO:0006892 (post-Golgi vesicle-mediated transport), GO:0006904 (vesicle docking involved in exocytosis), GO:0006909 (phagocytosis), GO:0009636 (response to toxic substance), GO:0015031 (protein transport), GO:0048208 (COPII vesicle coating), GO:0051223 (regulation of…			0.667458	0.494657		-0.322161	-0.245466	-0.229826		-0.0891411	-0.114047	-0.161474					77.358	71.9831	30.0662	-0.669695	5.67409	10.728	0.00684623	0.0865205	0.00248304	0.0439369	0.23887	-0.264575	-0.735431	0.526586	0.0375969		79.3397	70.158	38.9636	41.2001	41.671	46.1442	45.3202	43.7899
ENSG00000136100	VPS36	PC	vacuolar protein sorting 36 homolog	This gene encodes a protein that is a subunit of the endosomal sorting complex required for transport II (ESCRT-II). This protein complex functions in sorting of ubiquitinated membrane proteins during endocytosis. A similar protein complex in rat is associated with RNA polymerase elongation factor II. [provided by RefSeq, Aug 2013].	hsa04144 (Endocytosis), GO:0006351 (transcription, DNA-templated), GO:0006355 (regulation of transcription, DNA-templated), GO:0016197 (endosomal transport), GO:0016236 (macroautophagy), GO:0036258 (multivesicular body assembly), GO:0043328 (protein targeting to vacuole involved in ubiquitin-dependent protein catabolic process via the multivesicular body sorting pathway), GO:0000814 (ESCRT II com…			0.620296	0.530648		-0.263033	-0.200284	-0.263033		-0.200284	-0.0544046	-0.169904					75.8891	11.115	62.5937	-0.946402	2.25766	9.28552	0.0104051	0.105409	0.00413198	0.0518526	0.23887	-0.306037	-0.765739	0.461003	0.0267572		7.76917	7.1806	3.29601	3.53144	3.29601	3.53144	4.12001	3.64916
ENSG00000110931	CAMKK2	PC	calcium/calmodulin dependent protein kinase kinase 2	The product of this gene belongs to the Serine/Threonine protein kinase family, and to the Ca(2+)/calmodulin-dependent protein kinase subfamily. The major isoform of this gene plays a role in the calcium/calmodulin-dependent (CaM) kinase cascade by phosphorylating the downstream kinases CaMK1 and CaMK4. Protein products of this gene also phosphorylate AMP-activated protein kinase (AMPK). This gen…	hsa04140 (Autophagy - animal), hsa04152 (AMPK signaling pathway), hsa04211 (Longevity regulating pathway), hsa04920 (Adipocytokine signaling pathway), hsa04921 (Oxytocin signaling pathway), hsa05034 (Alcoholism), GO:0000165 (MAPK cascade), GO:0001934 (positive regulation of protein phosphorylation), GO:0006468 (protein phosphorylation), GO:0018105 (peptidyl-serine phosphorylation), GO:0018107 (pe…			-0.0568618	-0.306654		-0.00597816	-0.0943384	0.0973664		0.149599	0.187568	0.029299					75.6432	51.879	87.693	0.322722	4.47465	4.08541	0.0667399	0.263152	0.0880485	0.102512	0.23887	0.806324	0.798049	0.0156261	0.0175982		20.9532	17.3041	21.7772	20.3646	23.5429	24.4847	25.1909	22.3658
ENSG00000116688	MFN2	PC	mitofusin 2	This gene encodes a mitochondrial membrane protein that participates in mitochondrial fusion and contributes to the maintenance and operation of the mitochondrial network. This protein is involved in the regulation of vascular smooth muscle cell proliferation, and it may play a role in the pathophysiology of obesity. Mutations in this gene cause Charcot-Marie-Tooth disease type 2A2, and hereditar…	hsa04137 (Mitophagy - animal), hsa04621 (NOD-like receptor signaling pathway), GO:0001825 (blastocyst formation), GO:0006626 (protein targeting to mitochondrion), GO:0006915 (apoptotic process), GO:0006986 (response to unfolded protein), GO:0007006 (mitochondrial membrane organization), GO:0007596 (blood coagulation), GO:0008053 (mitochondrial fusion), GO:0016236 (macroautophagy), GO:0034497 (pro…			-0.177353	-0.037877		-0.0411634	0.0105407	-0.0150797		0.0372729	0.0711481	0.152512					75.4805	85.1976	67.5077	0.198388	6.70961	3.74877	0.0773727	0.284126	0.126771	0.0621765	0.23887	0.881917	0.848254	0.00376031	0.00777158		91.9352	101.47	101.235	105.002	103.118	107.003	109.592	116.067
ENSG00000206418	RAB12	PC	RAB12, member RAS oncogene family		GO:0006914 (autophagy), GO:0008333 (endosome to lysosome transport), GO:0015031 (protein transport), GO:0016239 (positive regulation of macroautophagy), GO:0044257 (cellular protein catabolic process), GO:0061024 (membrane organization), GO:0000139 (Golgi membrane), GO:0005764 (lysosome), GO:0005765 (lysosomal membrane), GO:0005768 (endosome), GO:0005776 (autophagic vacuole), GO:0005794 (Golgi ap…			-0.0884195	-0.0938332		-0.335344	-0.387576	-0.206605		0.775721	0.350744	-0.0146865					74.4431	61.8207	43.7142	0.599227	5.03619	5.41918	0.0387203	0.203022	0.0283651	0.0439369	0.23887	0.566947	0.577633	0.1428	0.133739		29.4287	29.311	24.4847	23.5429	26.9567	55.2082	40.6116	31.0767
ENSG00000149547	EI24	PC	EI24, autophagy associated transmembrane protein	This gene encodes a putative tumor suppressor and has higher expression in p53-expressing cells than in control cells and is an immediate-early induction target of p53-mediated apoptosis. The encoded protein may suppress cell growth by inducing apoptotic cell death through the caspase 9 and mitochondrial pathways. This gene is located on human chromosome 11q24, a region frequently altered in canc…	hsa04115 (p53 signaling pathway), GO:0006915 (apoptotic process), GO:0016236 (macroautophagy), GO:0030308 (negative regulation of cell growth), GO:0005783 (endoplasmic reticulum), GO:0005789 (endoplasmic reticulum membrane), GO:0005794 (Golgi apparatus), GO:0005829 (cytosol), GO:0016020 (membrane), GO:0016021 (integral component of membrane), GO:0031965 (nuclear membrane)			0.685769	0.325256		-0.107877	-0.307695	-0.310311		-0.161189	-0.0564659	-0.0674875					73.9867	81.3162	34.689	-0.567851	6.33648	8.1955	0.0146031	0.126078	0.00798376	0.0685251	0.23887	-0.340168	-0.675216	0.40968	0.0661416		127.367	98.7626	72.63	62.9774	62.8596	69.9225	75.3374	74.7488
ENSG00000090674	MCOLN1	PC	mucolipin 1	This gene encodes a memberof the transient receptor potential (TRP) cation channel gene family. The transmembrane protein localizes to intracellular vesicular membranes including lysosomes, and functions in the late endocytic pathway and in the regulation of lysosomal exocytosis. The channel is permeable to Ca(2+), Fe(2+), Na(+), K(+), and H(+), and is modulated by changes in Ca(2+) concentration…	hsa04142 (Lysosome), GO:0006812 (cation transport), GO:0033572 (transferrin transport), GO:0034755 (iron ion transmembrane transport), GO:0051209 (release of sequestered calcium ion into cytosol), GO:0070588 (calcium ion transmembrane transport), GO:0097352 (autophagic vacuole maturation), GO:0005765 (lysosomal membrane), GO:0005829 (cytosol), GO:0005886 (plasma membrane), GO:0005887 (integral co…			-0.12303	0.304407		0.0958134	0.208826	0.243005		-0.426436	-0.154464	-0.148122					73.879	58.0716	23.3789	-0.410674	4.82626	4.1501	0.064905	0.260447	0.0684013	0.082085	0.23887	-0.755929	-0.61653	0.0300197	0.103538		25.3087	34.7258	29.7818	32.3715	33.1955	20.1292	24.7201	24.8378
ENSG00000175768	TOMM5	PC	translocase of outer mitochondrial membrane 5		GO:0006626 (protein targeting to mitochondrion), GO:0016236 (macroautophagy), GO:0005739 (mitochondrion), GO:0005741 (mitochondrial outer membrane), GO:0005742 (mitochondrial outer membrane translocase complex), GO:0016021 (integral component of membrane), GO:0008565 (protein transporter activity), R-HSA-1268020 (Homo sapiens: Mitochondrial protein import), R-HSA-392499 (Homo sapiens: Metabolism …			0.0408877	-0.98469		0.440029	-0.278943	0.0408877		0.367877	0.211754	0.162197					72.9432	65.958	37.0798	0.63622	5.28133	4.79018	0.0496781	0.229296	0.0367116	0.240944	0.349633	0.627387	0.627164	0.0958842	0.0960381		38.2573	17.7749	51.0882	30.2527	38.2573	48.4985	43.319	41.7887
ENSG00000149357	LAMTOR1	PC	late endosomal/lysosomal adaptor, MAPK and MTOR activator 1		hsa04150 (mTOR signaling pathway), GO:0001919 (regulation of receptor recycling), GO:0007032 (endosome organization), GO:0007040 (lysosome organization), GO:0007050 (cell cycle arrest), GO:0010872 (regulation of cholesterol esterification), GO:0010874 (regulation of cholesterol efflux), GO:0016049 (cell growth), GO:0016236 (macroautophagy), GO:0032008 (positive regulation of TOR signaling), GO:00…			-0.209108	-0.0962646		0.0548114	0.0709312	-0.0069097		0.0300392	0.101689	0.0548114					72.4839	96.0833	16.1888	0.201808	8.37421	4.38513	0.0587336	0.248713	0.0978948	0.12489	0.23887	0.684422	0.814673	0.0611479	0.0137833		285.929	309.354	343.727	347.611	329.248	337.841	355.145	343.727
ENSG00000196235	SUPT5H	PC	SPT5 homolog, DSIF elongation factor subunit		GO:0000122 (negative regulation of transcription from RNA polymerase II promoter), GO:0006338 (chromatin remodeling), GO:0006354 (DNA-templated transcription, elongation), GO:0006366 (transcription from RNA polymerase II promoter), GO:0006368 (transcription elongation from RNA polymerase II promoter), GO:0006370 (7-methylguanosine mRNA capping), GO:0007049 (cell cycle), GO:0010033 (response to or…			-0.336136	-0.190479		0.136937	0.0446178	0.131452		0.134197	0.050443	0.028968					72.0025	91.2227	54.0273	0.303531	7.39668	5.78467	0.033685	0.188877	0.0423801	0.119433	0.23887	0.491354	0.725396	0.216255	0.0416918		132.076	146.319	184.106	172.57	183.399	183.753	173.276	170.686
ENSG00000051382	PIK3CB	PC	phosphatidylinositol-4,5-bisphosphate 3-kinase catalytic subunit beta	This gene encodes an isoform of the catalytic subunit of phosphoinositide 3-kinase (PI3K). These kinases are important in signaling pathways involving receptors on the outer membrane of eukaryotic cells and are named for their catalytic subunit. The encoded protein is the catalytic subunit for PI3Kbeta (PI3KB). PI3KB has been shown to be part of the activation pathway in neutrophils which have bo…	hsa00562 (Inositol phosphate metabolism), hsa01100 (Metabolic pathways), hsa01521 (EGFR tyrosine kinase inhibitor resistance), hsa01522 (Endocrine resistance), hsa01524 (Platinum drug resistance), hsa04012 (ErbB signaling pathway), hsa04014 (Ras signaling pathway), hsa04015 (Rap1 signaling pathway), hsa04024 (cAMP signaling pathway), hsa04062 (Chemokine signaling pathway), hsa04066 (HIF-1 signali…			0.256311	0.296958		-0.0916675	-0.258349	0.256311		-0.229197	0.0577353	-0.288102					70.4877	13.4174	78.8972	-0.572278	2.38504	4.13577	0.0653063	0.261067	0.059389	0.153663	0.255789	-0.690759	-0.709421	0.057845	0.0487476		6.23888	6.47431	4.47316	3.76687	6.23888	3.88458	5.17945	3.64916
ENSG00000182473	EXOC7	PC	exocyst complex component 7	The protein encoded by this gene is a component of the exocyst complex. The exocyst complex plays a critical role in vesicular trafficking and the secretory pathway by targeting post-Golgi vesicles to the plasma membrane. The encoded protein is required for assembly of the exocyst complex and docking of the complex to the plasma membrane. The encoded protein may also play a role in pre-mRNA splic…	hsa04910 (Insulin signaling pathway), GO:0006887 (exocytosis), GO:0015031 (protein transport), GO:0016241 (regulation of macroautophagy), GO:2000535 (regulation of entry of bacterium into host cell), GO:0000145 (exocyst), GO:0005815 (microtubule organizing center), GO:0005829 (cytosol), GO:0005886 (plasma membrane), GO:0016020 (membrane), GO:0032584 (growth cone membrane), GO:0034451 (centriolar …			-0.0855408	-0.288391		0.102246	0.0383731	0.0129173		0.0807873	-0.0238027	0.16341					69.631	86.0797	71.6277	0.246172	6.78257	4.31823	0.0604151	0.251623	0.0869113	0.133469	0.23887	0.64254	0.730967	0.085764	0.0393868		103	89.2277	117.597	112.418	110.416	115.831	107.591	122.776
ENSG00000101844	ATG4A	PC	autophagy related 4A cysteine peptidase	Autophagy is the process by which endogenous proteins and damaged organelles are destroyed intracellularly. Autophagy is postulated to be essential for cell homeostasis and cell remodeling during differentiation, metamorphosis, non-apoptotic cell death, and aging. Reduced levels of autophagy have been described in some malignant tumors, and a role for autophagy in controlling the unregulated cell…	hsa04136 (Autophagy - other), hsa04140 (Autophagy - animal), GO:0000045 (autophagic vacuole assembly), GO:0000422 (mitochondrion degradation), GO:0006501 (C-terminal protein lipidation), GO:0006508 (proteolysis), GO:0006612 (protein targeting to membrane), GO:0044804 (nucleophagy), GO:0051697 (protein delipidation), GO:0005737 (cytoplasm), GO:0005829 (cytosol), GO:0004197 (cysteine-type endopepti…			0.404518	0.242755		-0.213668	-0.148072	0.0325182		-0.0853301	-0.11636	-0.11636					69.3975	30.8927	52.8187	-0.482814	3.33543	5.40404	0.0389477	0.203461	0.0388981	0.116414	0.23887	-0.494305	-0.775009	0.213083	0.0238848		13.5372	11.8892	8.12231	8.59317	10.0057	9.06403	8.8286	8.8286
ENSG00000115561	CHMP3	PC	charged multivesicular body protein 3	This gene encodes a protein that sorts transmembrane proteins into lysosomes/vacuoles via the multivesicular body (MVB) pathway. This protein, along with other soluble coiled-coil containing proteins, forms part of the ESCRT-III protein complex that binds to the endosomal membrane and recruits additional cofactors for protein sorting into the MVB. This protein may also co-immunoprecipitate with a…	hsa04144 (Endocytosis), hsa04217 (Necroptosis), GO:0000920 (cytokinetic cell separation), GO:0006915 (apoptotic process), GO:0010824 (regulation of centrosome duplication), GO:0015031 (protein transport), GO:0016197 (endosomal transport), GO:0016236 (macroautophagy), GO:0019058 (viral life cycle), GO:0036258 (multivesicular body assembly), GO:0039702 (viral budding via host ESCRT complex), GO:005…			0.316869	0.606772		-0.113966	-0.0853961	-0.345051		-0.564071	0.0649141	0.11993					68.3053	60.3652	45.2316	-0.550807	4.95434	5.28558	0.0407828	0.208974	0.0316547	0.119433	0.23887	-0.491354	-0.635771	0.216255	0.0902041		37.6687	46.4973	27.4275	28.0161	23.0721	19.5406	31.3121	32.607
ENSG00000083750	RRAGB	PC	Ras related GTP binding B	Ras-homologous GTPases constitute a large family of signal transducers that alternate between an activated, GTP-binding state and an inactivated, GDP-binding state. These proteins represent cellular switches that are operated by GTP-exchange factors and factors that stimulate their intrinsic GTPase activity. All GTPases of the Ras superfamily have in common the presence of six conserved motifs in…	hsa04140 (Autophagy - animal), hsa04150 (mTOR signaling pathway), GO:0007050 (cell cycle arrest), GO:0016236 (macroautophagy), GO:0032006 (regulation of TOR signaling), GO:0032008 (positive regulation of TOR signaling), GO:0034198 (cellular response to amino acid starvation), GO:0034613 (cellular protein localization), GO:0071230 (cellular response to amino acid stimulus), GO:1904263 (NA), GO:199…			0.343186	0.343186		0.104357	-0.330145	-0.0476778		-0.291661	-0.254177	0.132931					67.7726	5.48694	22.1967	-0.685127	1.92459	4.5763	0.0542313	0.239884	0.0435076	0.130269	0.23887	-0.570352	-0.711974	0.139877	0.0475751		4.94402	4.94402	3.88458	2.35429	3.29601	2.47201	2.58972	4.0023
ENSG00000135317	SNX14	PC	sorting nexin 14	This gene encodes a member of the sorting nexin family. Members of this family have a phox (PX) phosphoinositide binding domain and are involved in intracellular trafficking. The encoded protein also contains a regulator of G protein signaling (RGS) domain. Regulator of G protein signaling family members are regulatory molecules that act as GTPase activating proteins for G alpha subunits of heter…	GO:0015031 (protein transport), GO:0097352 (autophagic vacuole maturation), GO:0005764 (lysosome), GO:0005765 (lysosomal membrane), GO:0005770 (late endosome), GO:0016021 (integral component of membrane), GO:0030425 (dendrite), GO:0031902 (late endosome membrane), GO:0080025 (phosphatidylinositol-3,5-bisphosphate binding)			0.80557	0.909909		-0.609533	-0.438409	-0.328778		-0.243381	0.0752424	-0.170621					67.6345	54.0314	67.1284	-0.951899	4.60336	8.6807	0.0125253	0.117151	0.00476812	0.0439369	0.23887	-0.264575	-0.695749	0.526586	0.0553214		40.3761	43.5544	13.8903	15.8915	17.3041	18.4812	23.5429	19.5406
ENSG00000140941	MAP1LC3B	PC	microtubule associated protein 1 light chain 3 beta	The product of this gene is a subunit of neuronal microtubule-associated MAP1A and MAP1B proteins, which are involved in microtubule assembly and important for neurogenesis. Studies on the rat homolog implicate a role for this gene in autophagy, a process that involves the bulk degradation of cytoplasmic component. [provided by RefSeq, Jul 2008]. Publication Note: This RefSeq record includes a su…	hsa04216 (Ferroptosis), GO:0000422 (mitochondrion degradation), GO:0006914 (autophagy), GO:0016236 (macroautophagy), GO:0061024 (membrane organization), GO:0097352 (autophagic vacuole maturation), GO:0000421 (autophagic vacuole membrane), GO:0005622 (intracellular), GO:0005739 (mitochondrion), GO:0005776 (autophagic vacuole), GO:0005829 (cytosol), GO:0005874 (microtubule), GO:0005930 (axoneme), G…			0.547389	0.436684		-0.282701	-0.246721	-0.187542		-0.117638	-0.104699	-0.0447736					66.8153	74.0296	29.9691	-0.54495	5.81272	8.51324	0.0132003	0.120235	0.00776395	0.0439369	0.23887	-0.264575	-0.712644	0.526586	0.0472703		80.87	74.7488	44.6139	45.791	47.7922	50.2642	50.735	52.9716
ENSG00000146872	TLK2	PC	tousled like kinase 2	This gene encodes a nuclear serine/threonine kinase that was first identified in Arabidopsis. The encoded protein is thought to function in the regulation of chromatin assembly in the S phase of the cell cycle by regulating the levels of a histone H3/H4 chaperone. This protein is associated with double-strand break repair of DNA damage caused by radiation. Pseudogenes of this gene are present on …	GO:0001672 (regulation of chromatin assembly or disassembly), GO:0006468 (protein phosphorylation), GO:0006974 (cellular response to DNA damage stimulus), GO:0007049 (cell cycle), GO:0007059 (chromosome segregation), GO:0010507 (negative regulation of autophagy), GO:0016569 (covalent chromatin modification), GO:0018105 (peptidyl-serine phosphorylation), GO:0032435 (negative regulation of proteaso…			-0.189021	-0.14658		0.11997	-0.0456372	-0.125818		0.236796	0.0303214	0.11997					66.2034	21.9566	50.9219	0.384058	2.86173	3.07627	0.10557	0.329407	0.122345	0.0796494	0.23887	0.836516	0.804673	0.00962802	0.016008		5.88573	6.12116	7.76917	6.70974	6.23888	8.59317	7.1806	7.76917
ENSG00000159210	SNF8	PC	SNF8, ESCRT-II complex subunit	SNF8, VPS25 (MIM 610907), and VPS36 (MIM 610903) form ESCRT-II (endosomal sorting complex required for transport II), a complex involved in endocytosis of ubiquitinated membrane proteins. SNF8, VPS25, and VPS36 are also associated in a multiprotein complex with RNA polymerase II elongation factor (ELL; MIM 600284) (Slagsvold et al., 2005 [PubMed 15755741]; Kamura et al., 2001 [PubMed 11278625]).[…	hsa04144 (Endocytosis), GO:0006351 (transcription, DNA-templated), GO:0006357 (regulation of transcription from RNA polymerase II promoter), GO:0010628 (positive regulation of gene expression), GO:0010797 (regulation of multivesicular body size involved in endosome transport), GO:0016197 (endosomal transport), GO:0016236 (macroautophagy), GO:0032456 (endocytic recycling), GO:0036258 (multivesicul…			-0.288038	-0.183038		0.138892	0.0728495	0.0751154		0.132813	0.00649083	0.0449151					63.3362	96.3215	15.4301	0.268414	8.47561	5.35893	0.0396345	0.205158	0.0538128	0.0956344	0.23887	0.415761	0.718026	0.305624	0.0448642		289.578	311.591	389.989	372.449	373.038	388.341	355.616	365.269
ENSG00000118873	RAB3GAP2	PC	RAB3 GTPase activating non-catalytic protein subunit 2	The protein encoded by this gene belongs to the RAB3 protein family, members of which are involved in regulated exocytosis of neurotransmitters and hormones. This protein forms the Rab3 GTPase-activating complex with RAB3GAP1, where it constitutes the regulatory subunit, whereas the latter functions as the catalytic subunit. This gene has the highest level of expression in the brain, consistent w…	GO:0006886 (intracellular protein transport), GO:0043087 (regulation of GTPase activity), GO:0043547 (positive regulation of GTPase activity), GO:0061024 (membrane organization), GO:0097051 (establishment of protein localization to endoplasmic reticulum membrane), GO:1903061 (positive regulation of protein lipidation), GO:1903373 (positive regulation of endoplasmic reticulum tubular network organ…			0.0730299	-0.248929		-0.264698	-0.0859739	-0.20263		0.41739	0.23878	0.0730299					62.3179	33.8303	51.3895	0.435824	3.49457	3.60308	0.0826097	0.293019	0.0849481	0.0979997	0.23887	0.627387	0.634289	0.0958842	0.0911934		11.536	8.8286	8.71089	10.1235	9.18175	15.1852	13.184	11.536
ENSG00000213585	VDAC1	PC	voltage dependent anion channel 1	This gene encodes a voltage-dependent anion channel protein that is a major component of the outer mitochondrial membrane. The encoded protein facilitates the exchange of metabolites and ions across the outer mitochondrial membrane and may regulate mitochondrial functions. This protein also forms channels in the plasma membrane and may be involved in transmembrane electron transport. Alternate sp…	hsa04020 (Calcium signaling pathway), hsa04022 (cGMP-PKG signaling pathway), hsa04217 (Necroptosis), hsa04218 (Cellular senescence), hsa04621 (NOD-like receptor signaling pathway), hsa04979 (Cholesterol metabolism), hsa05012 (Parkinson disease), hsa05016 (Huntington disease), hsa05164 (Influenza A), hsa05166 (Human T-cell leukemia virus 1 infection), GO:0001662 (behavioral fear response), GO:0006…			0.187025	0.298819		-0.0792024	-0.104181	-0.175832		-0.104994	-0.128774	0.107139					62.1479	93.6133	37.2563	-0.253104	7.80922	3.93635	0.071213	0.271633	0.0871028	0.133469	0.23887	-0.566947	-0.617106	0.1428	0.103123		253.675	274.275	210.592	206.942	196.819	206.825	203.411	239.903
ENSG00000166887	VPS39	PC	VPS39, HOPS complex subunit	This gene encodes a protein that may promote clustering and fusion of late endosomes and lysosomes. The protein may also act as an adaptor protein that modulates the transforming growth factor-beta response by coupling the transforming growth factor-beta receptor complex to the Smad pathway. Alternative splicing results in multiple transcript variants. [provided by RefSeq, Jul 2014].	GO:0006886 (intracellular protein transport), GO:0006914 (autophagy), GO:0008333 (endosome to lysosome transport), GO:0034058 (endosomal vesicle fusion), GO:0097576 (vacuole fusion), GO:1902774 (late endosome to lysosome transport), GO:1990126 (retrograde transport, endosome to plasma membrane), GO:0005765 (lysosomal membrane), GO:0030123 (AP-3 adaptor complex), GO:0030897 (HOPS complex), GO:0031…			-0.181318	-0.488437		0.201453	0.0610058	0.204714		0.0859733	-0.0946036	0.211212					60.4451	68.6662	51.6453	0.365591	5.46026	3.7403	0.0776659	0.284577	0.0832557	0.133469	0.23887	0.566947	0.59344	0.1428	0.12094		37.9041	30.2527	50.0287	45.2024	50.1465	46.0264	40.3761	50.3819
ENSG00000181929	PRKAG1	PC	protein kinase AMP-activated non-catalytic subunit gamma 1	The protein encoded by this gene is a regulatory subunit of the AMP-activated protein kinase (AMPK). AMPK is a heterotrimer consisting of an alpha catalytic subunit, and non-catalytic beta and gamma subunits. AMPK is an important energy-sensing enzyme that monitors cellular energy status. In response to cellular metabolic stresses, AMPK is activated, and thus phosphorylates and inactivates acetyl…	hsa04068 (FoxO signaling pathway), hsa04152 (AMPK signaling pathway), hsa04211 (Longevity regulating pathway), hsa04213 (Longevity regulating pathway - multiple species), hsa04371 (Apelin signaling pathway), hsa04530 (Tight junction), hsa04710 (Circadian rhythm), hsa04714 (Thermogenesis), hsa04910 (Insulin signaling pathway), hsa04920 (Adipocytokine signaling pathway), hsa04921 (Oxytocin signalin…			0.307349	0.0541299		0.0954713	-0.19223	-0.0256222		0.039376	-0.0936876	-0.184786					60.0664	80.3017	22.1703	-0.256245	6.26099	3.62234	0.081893	0.291795	0.104914	0.235877	0.342764	-0.579546	-0.63436	0.132152	0.0911463		94.5249	78.9866	81.3409	66.2734	74.6311	78.1626	71.0997	66.6265
ENSG00000132356	PRKAA1	PC	protein kinase AMP-activated catalytic subunit alpha 1	The protein encoded by this gene belongs to the ser/thr protein kinase family. It is the catalytic subunit of the 5_-prime-AMP-activated protein kinase (AMPK). AMPK is a cellular energy sensor conserved in all eukaryotic cells. The kinase activity of AMPK is activated by the stimuli that increase the cellular AMP/ATP ratio. AMPK regulates the activities of a number of key metabolic enzymes throug…	hsa04068 (FoxO signaling pathway), hsa04140 (Autophagy - animal), hsa04150 (mTOR signaling pathway), hsa04151 (PI3K-Akt signaling pathway), hsa04152 (AMPK signaling pathway), hsa04211 (Longevity regulating pathway), hsa04213 (Longevity regulating pathway - multiple species), hsa04371 (Apelin signaling pathway), hsa04530 (Tight junction), hsa04710 (Circadian rhythm), hsa04714 (Thermogenesis), hsa0…			-0.371692	0.199125		-0.414767	-0.414767	-0.414767		0.750411	0.617764	0.0486925					59.3682	28.0699	46.7667	0.798186	3.19182	4.56452	0.0544964	0.240316	0.0412524	0.0541138	0.23887	0.438938	0.581226	0.276592	0.130767		6.00345	9.88803	5.76802	5.76802	5.76802	15.4206	13.8903	8.71089
ENSG00000185896	LAMP1	PC	lysosomal associated membrane protein 1	The protein encoded by this gene is a member of a family of membrane glycoproteins. This glycoprotein provides selectins with carbohydrate ligands. It may also play a role in tumor cell metastasis. [provided by RefSeq, Jul 2008]. Publication Note: This RefSeq record includes a subset of the publications that are available for this gene. Please see the Gene record to access additional publications.	hsa04140 (Autophagy - animal), hsa04142 (Lysosome), hsa04145 (Phagosome), hsa05152 (Tuberculosis), GO:0008626 (granzyme-mediated apoptotic signaling pathway), GO:0043312 (neutrophil degranulation), GO:0043323 (positive regulation of natural killer cell degranulation), GO:0045954 (positive regulation of natural killer cell mediated cytotoxicity), GO:0046718 (viral entry into host cell), GO:0048102…			-0.0105398	-0.303965		0.0853669	-0.0826904	0.0428418		0.245282	-0.0676359	0.0913408					58.4523	85.374	87.9047	0.242623	6.72474	3.37313	0.0917882	0.307775	0.118317	0.290512	0.393599	0.592144	0.618712	0.121962	0.101973		104.178	84.6369	111.476	98.9981	108.18	124.778	100.057	111.947
ENSG00000080815	PSEN1	PC	presenilin 1	Alzheimer_s disease (AD) patients with an inherited form of the disease carry mutations in the presenilin proteins (PSEN1; PSEN2) or in the amyloid precursor protein (APP). These disease-linked mutations result in increased production of the longer form of amyloid-beta (main component of amyloid deposits found in AD brains). Presenilins are postulated to regulate APP processing through their effe…	hsa04310 (Wnt signaling pathway), hsa04330 (Notch signaling pathway), hsa04722 (Neurotrophin signaling pathway), hsa05010 (Alzheimer disease), hsa05165 (Human papillomavirus infection), GO:0000045 (autophagic vacuole assembly), GO:0000122 (negative regulation of transcription from RNA polymerase II promoter), GO:0000186 (activation of MAPKK activity), GO:0001568 (blood vessel development), GO:000…			0.208615	0.27937		-0.0821724	-0.059014	-0.149066		-0.129635	-0.0498537	-0.0182431					58.2133	64.6701	40.7675	-0.298867	5.20741	4.62543	0.0531424	0.238184	0.0702721	0.0956344	0.23887	-0.415761	-0.754636	0.305624	0.030467		42.495	44.7316	34.3727	34.9613	32.7247	33.1955	35.1967	36.0207
ENSG00000163932	PRKCD	PC	protein kinase C delta	Protein kinase C (PKC) is a family of serine- and threonine-specific protein kinases that can be activated by calcium and the second messenger diacylglycerol. PKC family members phosphorylate a wide variety of protein targets and are known to be involved in diverse cellular signaling pathways. PKC family members also serve as major receptors for phorbol esters, a class of tumor promoters. Each me…	hsa04062 (Chemokine signaling pathway), hsa04140 (Autophagy - animal), hsa04270 (Vascular smooth muscle contraction), hsa04621 (NOD-like receptor signaling pathway), hsa04625 (C-type lectin receptor signaling pathway), hsa04666 (Fc gamma R-mediated phagocytosis), hsa04722 (Neurotrophin signaling pathway), hsa04750 (Inflammatory mediator regulation of TRP channels), hsa04912 (GnRH signaling pathwa…			-0.153098	-0.00892278		-0.0256503	-0.153098	0.0198917		0.188915	0.0561129	0.0758496					58.207	66.1697	42.6114	0.207535	5.30192	2.51771	0.139214	0.381929	0.19173	0.0782622	0.23887	0.792155	0.72231	0.0190933	0.0430028		34.9613	38.8458	38.375	34.9613	39.6699	44.8493	40.7293	41.3179
ENSG00000118804	STBD1	PC	starch binding domain 1	This locus represents naturally occurring read-through transcription between the neighboring FAM47E (family with sequence similarity 47, member E) and STBD1 (starch binding domain 1) genes on chromosome 4. The read-through transcript encodes a protein that shares sequence identity with the upstream gene product but its C-terminal region is distinct due to frameshifts relative to the downstream ge…	GO:0005980 (glycogen catabolic process), GO:0043312 (neutrophil degranulation), GO:0046907 (intracellular transport), GO:0061723 (NA), GO:0005622 (intracellular), GO:0005783 (endoplasmic reticulum), GO:0005789 (endoplasmic reticulum membrane), GO:0005829 (cytosol), GO:0005886 (plasma membrane), GO:0005887 (integral component of plasma membrane), GO:0016020 (membrane), GO:0030315 (T-tubule), GO:00…			-0.0903244	-0.530963		0.104715	0.104715	0.0711587		-0.128804	0.348297	0.121205					57.3199	24.1531	93.3127	0.494364	2.97945	3.2985	0.0950333	0.312804	0.0949708	0.231808	0.342764	0.583026	0.637699	0.129291	0.0889259		6.94517	4.59087	8.24003	8.24003	8.0046	6.70974	10.1235	8.35774
ENSG00000151532	VTI1A	PC	vesicle transport through interaction with t-SNAREs 1A		hsa04130 (SNARE interactions in vesicular transport), GO:0006623 (protein targeting to vacuole), GO:0006888 (ER to Golgi vesicle-mediated transport), GO:0006891 (intra-Golgi vesicle-mediated transport), GO:0006896 (Golgi to vacuole transport), GO:0006914 (autophagy), GO:0042147 (retrograde transport, endosome to Golgi), GO:0048280 (vesicle fusion with Golgi apparatus), GO:0050882 (voluntary muscu…			-0.3032	-0.234472		0.0397601	0.197329	0.0397601		-0.10612	0.120695	0.246247					56.7634	8.13338	48.4076	0.501113	2.08329	2.93102	0.113242	0.341867	0.121686	0.130269	0.23887	0.646399	0.675211	0.0832906	0.0661441		2.82515	3.06058	4.12001	4.8263	4.12001	3.53144	4.47316	5.06173
ENSG00000083937	CHMP2B	PC	charged multivesicular body protein 2B	This gene encodes a component of the heteromeric ESCRT-III complex (Endosomal Sorting Complex Required for Transport III) that functions in the recycling or degradation of cell surface receptors. ESCRT-III functions in the concentration and invagination of ubiquitinated endosomal cargos into intralumenal vesicles. The protein encoded by this gene is found as a monomer in the cytosol or as an olig…	hsa04144 (Endocytosis), hsa04217 (Necroptosis), GO:0000920 (cytokinetic cell separation), GO:0006914 (autophagy), GO:0006997 (nucleus organization), GO:0007032 (endosome organization), GO:0007080 (mitotic metaphase plate congression), GO:0010824 (regulation of centrosome duplication), GO:0015031 (protein transport), GO:0016197 (endosomal transport), GO:0016236 (macroautophagy), GO:0019058 (viral …			0.504313	0.940429		-0.463471	-0.450759	-0.352904		0.200212	0.0110056	-0.388826					56.0671	46.0921	56.4535	-0.772401	4.14699	5.16293	0.0427933	0.212346	0.0295871	0.0685251	0.23887	-0.340168	-0.596597	0.40968	0.11847		24.0138	33.1955	11.3006	11.4183	12.36	19.0698	16.4801	12.0069
ENSG00000050748	MAPK9	PC	mitogen-activated protein kinase 9	The protein encoded by this gene is a member of the MAP kinase family. MAP kinases act as an integration point for multiple biochemical signals, and are involved in a wide variety of cellular processes such as proliferation, differentiation, transcription regulation and development. This kinase targets specific transcription factors, and thus mediates immediate-early gene expression in response t…	hsa01522 (Endocrine resistance), hsa04010 (MAPK signaling pathway), hsa04012 (ErbB signaling pathway), hsa04014 (Ras signaling pathway), hsa04024 (cAMP signaling pathway), hsa04068 (FoxO signaling pathway), hsa04071 (Sphingolipid signaling pathway), hsa04137 (Mitophagy - animal), hsa04140 (Autophagy - animal), hsa04141 (Protein processing in endoplasmic reticulum), hsa04210 (Apoptosis), hsa04215 …			-0.406934	-0.158533		0.00155227	0.249143	0.0211819		0.371438	-0.00505076	-0.0727985					55.7705	54.0138	80.6087	0.388512	4.60249	3.67888	0.0798325	0.288082	0.0880684	0.119433	0.23887	0.491354	0.594438	0.216255	0.120156		17.4218	21.0709	23.7784	28.6047	24.1315	31.3121	23.6607	22.4835
ENSG00000136943	CTSV	PC	cathepsin V	The protein encoded by this gene, a member of the peptidase C1 family, is a lysosomal cysteine proteinase that may play an important role in corneal physiology. This gene is expressed in colorectal and breast carcinomas but not in normal colon, mammary gland, or peritumoral tissues, suggesting a possible role for this gene in tumor processes. Alternatively spliced variants, encoding the same prot…	hsa04142 (Lysosome), hsa04210 (Apoptosis), GO:0007283 (spermatogenesis), GO:0009267 (cellular response to starvation), GO:0009749 (response to glucose), GO:0010259 (multicellular organismal aging), GO:0010839 (negative regulation of keratinocyte proliferation), GO:0016540 (protein autoprocessing), GO:0019886 (antigen processing and presentation of exogenous peptide antigen via MHC class II), GO:0…			-0.36037	-0.421774		0.123854	0.0928257	0.318807		0.275249	-0.108817	0.0802251					55.4954	53.7227	77.3798	0.457003	4.58579	4.24702	0.0622692	0.254373	0.0630026	0.0956344	0.23887	0.415761	0.607561	0.305624	0.110115		17.7749	16.9509	25.6618	25.0732	29.6641	28.7224	21.5418	24.8378
ENSG00000139112	GABARAPL1	PC	GABA type A receptor associated protein like 1		hsa04068 (FoxO signaling pathway), hsa04136 (Autophagy - other), hsa04137 (Mitophagy - animal), hsa04140 (Autophagy - animal), hsa04371 (Apelin signaling pathway), hsa04621 (NOD-like receptor signaling pathway), hsa04727 (GABAergic synapse), hsa05167 (Kaposi sarcoma-associated herpesvirus infection), GO:0016236 (macroautophagy), GO:0097352 (autophagic vacuole maturation), GO:0000421 (autophagic v…			0.316289	0.123112		-0.085294	-0.150091	-0.0468186		-0.181008	-0.0950753	0.118887					55.1595	63.6909	29.8191	-0.257952	5.14699	2.78703	0.121543	0.354457	0.149472	0.133469	0.23887	-0.64254	-0.603697	0.085764	0.11302		44.0253	38.2573	32.8424	31.3121	33.7841	30.6058	32.607	38.1396
ENSG00000131100	ATP6V1E1	PC	ATPase H+ transporting V1 subunit E1	This gene encodes a component of vacuolar ATPase (V-ATPase), a multisubunit enzyme that mediates acidification of eukaryotic intracellular organelles. V-ATPase dependent organelle acidification is necessary for such intracellular processes as protein sorting, zymogen activation, receptor-mediated endocytosis, and synaptic vesicle proton gradient generation. V-ATPase is composed of a cytosolic V1 …	hsa00190 (Oxidative phosphorylation), hsa01100 (Metabolic pathways), hsa04145 (Phagosome), hsa04150 (mTOR signaling pathway), hsa04721 (Synaptic vesicle cycle), hsa04966 (Collecting duct acid secretion), hsa05110 (Vibrio cholerae infection), hsa05120 (Epithelial cell signaling in Helicobacter pylori infection), hsa05165 (Human papillomavirus infection), hsa05323 (Rheumatoid arthritis), GO:0008286…			-0.13007	-0.0359683		0.0097775	-0.0181075	0.0324132		0.0535349	0.0720536	0.0163666					54.4463	95.0688	16.1712	0.126672	8.12632	1.98991	0.18438	0.442005	0.275932	0.0685251	0.23887	0.869318	0.838041	0.00504681	0.00937247		254.735	272.039	280.867	275.452	285.34	289.578	293.345	282.162
ENSG00000163719	MTMR14	PC	myotubularin related protein 14	This gene encodes a myotubularin-related protein. The encoded protein is a phosphoinositide phosphatase that specifically dephosphorylates phosphatidylinositol 3,5-biphosphate and phosphatidylinositol 3-phosphate. Mutations in this gene are correlated with autosomal dominant centronuclear myopathy. Alternate splicing results in multiple transcript variants. A pseudogene of this gene is found on c…	hsa00562 (Inositol phosphate metabolism), hsa01100 (Metabolic pathways), hsa04070 (Phosphatidylinositol signaling system), hsa04140 (Autophagy - animal), GO:0006661 (phosphatidylinositol biosynthetic process), GO:0016236 (macroautophagy), GO:0035335 (peptidyl-tyrosine dephosphorylation), GO:0001726 (ruffle), GO:0005829 (cytosol), GO:0048471 (perinuclear region of cytoplasm), GO:0004438 (phosphati…			0.216969	-0.000465929		0.0415836	-0.0437779	0.079922		-0.225087	-0.105538	0.0363939					54.4446	76.0586	53.6568	-0.21582	5.9581	2.88327	0.115914	0.346338	0.159671	0.249352	0.35404	-0.604743	-0.669253	0.11223	0.0695		72.0414	61.6825	63.5659	59.7991	65.3317	52.5008	57.2093	63.3305
ENSG00000109083	IFT20	PC	intraflagellar transport 20	This gene encodes a intraflagellar transport protein important for intracellular transport. The encoded protein forms part of a complex involved in trafficking of proteins from the Golgi body, including recycling of immune signalling components (Finetti et al., PubMed: 19855387). This gene is part of a complex set of sense-antisense loci that may be co-regulated. Alternatively spliced transcript …	GO:0001736 (establishment of planar polarity), GO:0001822 (kidney development), GO:0007224 (smoothened signaling pathway), GO:0008542 (visual learning), GO:0034067 (protein localization to Golgi apparatus), GO:0035735 (intraciliary transport involved in cilium morphogenesis), GO:0035845 (photoreceptor cell outer segment organization), GO:0036372 (opsin transport), GO:0051642 (centrosome localizat…			-0.0330935	-0.231044		0.127768	-0.0629965	-0.0858377		0.00343417	0.154001	0.127768					53.3472	51.3585	15.7742	0.244026	4.4467	2.35755	0.151265	0.400379	0.19591	0.165432	0.273971	0.709771	0.708784	0.0485857	0.049043		20.9532	18.0103	23.6607	20.4824	20.1292	21.5418	24.1315	23.6607
ENSG00000100926	TM9SF1	PC	transmembrane 9 superfamily member 1		GO:0006914 (autophagy), GO:0000421 (autophagic vacuole membrane), GO:0005765 (lysosomal membrane), GO:0016021 (integral component of membrane), GO:0031410 (cytoplasmic vesicle)			-0.1401	0.304964		0.313842	0.241234	0.322667		-0.608699	-0.465092	0.0311845					52.4999	39.8906	49.7133	-0.557571	3.81725	3.28408	0.0956761	0.313917	0.0881181	0.0956344	0.23887	-0.491354	-0.544945	0.216255	0.162494		12.0069	17.0686	17.1863	16.2446	17.3041	8.12231	9.18175	13.7726
ENSG00000078804	TP53INP2	PC	tumor protein p53 inducible nuclear protein 2		hsa04140 (Autophagy - animal), GO:0000045 (autophagic vacuole assembly), GO:0001649 (osteoblast differentiation), GO:0001894 (tissue homeostasis), GO:0006351 (transcription, DNA-templated), GO:0006511 (ubiquitin-dependent protein catabolic process), GO:0010508 (positive regulation of autophagy), GO:0045893 (positive regulation of transcription, DNA-templated), GO:1903828 (NA), GO:0005634 (nucleus…			0.250513	0.0692692		-0.0005536	-0.0490531	-0.0707953		-0.0928703	-0.198322	0.0918122					52.3666	73.668	80.0176	-0.218509	5.79333	2.785	0.121665	0.354457	0.163243	0.235877	0.342764	-0.579546	-0.646809	0.132152	0.0830298		65.8025	57.7979	54.9728	53.0893	52.2653	51.4413	47.6745	58.7396
ENSG00000165699	TSC1	PC	TSC complex subunit 1	This gene encodes a growth inhibitory protein thought to play a role in the stabilization of tuberin. Mutations in this gene have been associated with tuberous sclerosis. Alternative splicing results in multiple transcript variants. [provided by RefSeq, Jun 2009].	hsa04072 (Phospholipase D signaling pathway), hsa04140 (Autophagy - animal), hsa04150 (mTOR signaling pathway), hsa04151 (PI3K-Akt signaling pathway), hsa04152 (AMPK signaling pathway), hsa04211 (Longevity regulating pathway), hsa04218 (Cellular senescence), hsa04714 (Thermogenesis), hsa04910 (Insulin signaling pathway), hsa05163 (Human cytomegalovirus infection), hsa05165 (Human papillomavirus i…			0.0588257	0.203709		-0.0797042	0.118536	0.301411		-0.551815	-0.0685628	0.0176001					52.1469	40.6845	95.6242	-0.382245	3.85735	2.64758	0.130317	0.367037	0.138258	0.249352	0.35404	-0.604743	-0.578918	0.11223	0.132672		14.7143	16.4801	13.184	15.4206	17.7749	8.94632	13.3018	14.2435
ENSG00000185359	HGS	PC	hepatocyte growth factor-regulated tyrosine kinase substrate	The protein encoded by this gene regulates endosomal sorting and plays a critical role in the recycling and degradation of membrane receptors. The encoded protein sorts monoubiquitinated membrane proteins into the multivesicular body, targeting these proteins for lysosome-dependent degradation. [provided by RefSeq, Dec 2010]. Publication Note: This RefSeq record includes a subset of the publicati…	hsa04144 (Endocytosis), hsa04145 (Phagosome), GO:0006622 (protein targeting to lysosome), GO:0007165 (signal transduction), GO:0008285 (negative regulation of cell proliferation), GO:0010324 (membrane invagination), GO:0010628 (positive regulation of gene expression), GO:0016197 (endosomal transport), GO:0016236 (macroautophagy), GO:0016579 (protein deubiquitination), GO:0036258 (multivesicular b…			-0.0637013	0.111671		0.0764808	0.171262	0.264113		-0.202683	-0.175915	-0.181229					52.0976	63.1616	21.0234	-0.269017	5.11488	2.53647	0.137882	0.379193	0.16758	0.0621765	0.23887	-0.629941	-0.553523	0.0941328	0.15465		32.607	37.0801	36.1384	38.7281	41.4356	29.4287	30.0172	29.8995
ENSG00000167657	DAPK3	PC	death associated protein kinase 3	Death-associated protein kinase 3 (DAPK3) induces morphological changes in apoptosis when overexpressed in mammalian cells. These results suggest that DAPK3 may play a role in the induction of apoptosis. [provided by RefSeq, Jul 2008]. Publication Note: This RefSeq record includes a subset of the publications that are available for this gene. Please see the Gene record to access additional public…	hsa04140 (Autophagy - animal), hsa05200 (Pathways in cancer), hsa05219 (Bladder cancer), GO:0000910 (cytokinesis), GO:0006351 (transcription, DNA-templated), GO:0006355 (regulation of transcription, DNA-templated), GO:0006468 (protein phosphorylation), GO:0006915 (apoptotic process), GO:0006940 (regulation of smooth muscle contraction), GO:0007088 (regulation of mitosis), GO:0007346 (regulation o…			-0.766206	-0.330097		0.206554	0.208518	0.389093		0.00206432	0.206554	0.0835208					51.73	79.9135	41.0057	0.553045	6.23163	4.94646	0.0466405	0.221454	0.0360665	0.0537348	0.23887	0.304188	0.593586	0.463855	0.120825		42.0241	57.5625	84.4014	84.5192	96.0552	72.9831	84.4014	77.3386
ENSG00000136888	ATP6V1G1	PC	ATPase H+ transporting V1 subunit G1	This gene encodes a component of vacuolar ATPase (V-ATPase), a multisubunit enzyme that mediates acidification of eukaryotic intracellular organelles. V-ATPase dependent organelle acidification is necessary for such intracellular processes as protein sorting, zymogen activation, receptor-mediated endocytosis, and synaptic vesicle proton gradient generation. V-ATPase is composed of a cytosolic V1 …	hsa00190 (Oxidative phosphorylation), hsa01100 (Metabolic pathways), hsa04145 (Phagosome), hsa04150 (mTOR signaling pathway), hsa04721 (Synaptic vesicle cycle), hsa04966 (Collecting duct acid secretion), hsa05110 (Vibrio cholerae infection), hsa05120 (Epithelial cell signaling in Helicobacter pylori infection), hsa05165 (Human papillomavirus infection), hsa05323 (Rheumatoid arthritis), GO:0008286…			0.21569	0.154806		0.0337867	-0.206	-0.0307556		-0.0120184	-0.0120184	-0.143489					51.7078	63.5498	12.0071	-0.234023	5.13676	2.75945	0.123218	0.356265	0.161926	0.130269	0.23887	-0.570352	-0.684712	0.139877	0.0609942		40.7293	38.9636	35.6676	29.8995	34.0195	34.4904	34.4904	31.3121
ENSG00000167987	VPS37C	PC	VPS37C, ESCRT-I subunit	VPS37C is a subunit of ESCRT-I (endosomal sorting complex required for transport I), a complex in the class E vacuolar protein sorting (VPS) pathway required for sorting ubiquitinated transmembrane proteins into internal vesicles of multivesicular bodies (Eastman et al., 2005 [PubMed 15509564]).[supplied by OMIM, Mar 2008].	hsa04144 (Endocytosis), GO:0015031 (protein transport), GO:0016197 (endosomal transport), GO:0016236 (macroautophagy), GO:0019058 (viral life cycle), GO:0036258 (multivesicular body assembly), GO:0039702 (viral budding via host ESCRT complex), GO:0075733 (intracellular transport of virus), GO:0000813 (ESCRT I complex), GO:0010008 (endosome membrane), GO:0031902 (late endosome membrane), GO:007006…			-0.111274	-0.141863		-0.056824	0.103901	0.00962983		0.0597775	-0.0184764	0.155128					51.5725	63.1793	41.6233	0.196489	5.1161	2.17144	0.166982	0.421208	0.228329	0.119433	0.23887	0.718132	0.735011	0.0448173	0.0377631		31.6653	30.959	32.9601	37.0801	34.6081	35.903	33.9018	38.4927
ENSG00000171552	BCL2L1	PC	BCL2 like 1	The protein encoded by this gene belongs to the BCL-2 protein family. BCL-2 family members form hetero- or homodimers and act as anti- or pro-apoptotic regulators that are involved in a wide variety of cellular activities. The proteins encoded by this gene are located at the outer mitochondrial membrane, and have been shown to regulate outer mitochondrial membrane channel (VDAC) opening. VDAC reg…	hsa01521 (EGFR tyrosine kinase inhibitor resistance), hsa01524 (Platinum drug resistance), hsa04014 (Ras signaling pathway), hsa04064 (NF-kappa B signaling pathway), hsa04115 (p53 signaling pathway), hsa04137 (Mitophagy - animal), hsa04140 (Autophagy - animal), hsa04151 (PI3K-Akt signaling pathway), hsa04210 (Apoptosis), hsa04215 (Apoptosis - multiple species), hsa04621 (NOD-like receptor signali…			-0.462356	-0.272877		0.15652	0.147703	0.220985		0.00121544	0.120923	0.087887					51.0498	89.0173	47.6577	0.384176	7.1138	5.45499	0.0381889	0.201613	0.0374514	0.0439369	0.23887	0.264575	0.64844	0.526586	0.0819995		98.6449	112.771	152.558	151.617	159.621	136.784	148.791	145.378
ENSG00000177628	GBA	PC	glucosylceramidase beta	This gene encodes a lysosomal membrane protein that cleaves the beta-glucosidic linkage of glycosylceramide, an intermediate in glycolipid metabolism. Mutations in this gene cause Gaucher disease, a lysosomal storage disease characterized by an accumulation of glucocerebrosides. A related pseudogene is approximately 12 kb downstream of this gene on chromosome 1. Alternative splicing results in mu…	hsa00511 (Other glycan degradation), hsa00600 (Sphingolipid metabolism), hsa01100 (Metabolic pathways), hsa04142 (Lysosome), GO:0006680 (glucosylceramide catabolic process), GO:0006687 (glycosphingolipid metabolic process), GO:0009267 (cellular response to starvation), GO:0009268 (response to pH), GO:0016241 (regulation of macroautophagy), GO:0023021 (termination of signal transduction), GO:00322…			-0.0990149	0.222918		0.076838	0.0744709	0.125669		-0.25697	0.0262955	-0.170207					50.8721	77.4876	33.7009	-0.225224	6.0593	2.4671	0.142887	0.387782	0.178954	0.149154	0.252534	-0.617342	-0.561046	0.102954	0.147945		61.5648	77.4563	69.8048	69.6871	72.2768	54.9728	67.3328	58.5042
ENSG00000115145	STAM2	PC	signal transducing adaptor molecule 2	The protein encoded by this gene is closely related to STAM, an adaptor protein involved in the downstream signaling of cytokine receptors, both of which contain a SH3 domain and the immunoreceptor tyrosine-based activation motif (ITAM). Similar to STAM, this protein acts downstream of JAK kinases, and is phosphorylated in response to cytokine stimulation. This protein and STAM thus are thought t…	hsa04144 (Endocytosis), hsa04630 (JAK-STAT signaling pathway), GO:0006886 (intracellular protein transport), GO:0016197 (endosomal transport), GO:0016236 (macroautophagy), GO:0016579 (protein deubiquitination), GO:0036258 (multivesicular body assembly), GO:0042059 (negative regulation of epidermal growth factor receptor signaling pathway), GO:0061024 (membrane organization), GO:0005654 (nucleopla…			0.188216	-0.410892		-0.123278	-0.308516	-0.00645113		0.372097	0.0866681	0.202157					50.8485	27.717	67.9224	0.41457	3.17546	2.46478	0.143058	0.388062	0.146231	0.149154	0.252534	0.617342	0.559648	0.102954	0.149178		10.1235	6.00345	7.76917	6.59202	8.59317	11.7715	9.29946	10.2412
ENSG00000072062	PRKACA	PC	protein kinase cAMP-activated catalytic subunit alpha	cAMP is a signaling molecule important for a variety of cellular functions. cAMP exerts its effects by activating the cAMP-dependent protein kinase, which transduces the signal through phosphorylation of different target proteins. The inactive kinase holoenzyme is a tetramer composed of two regulatory and two catalytic subunits. cAMP causes the dissociation of the inactive holoenzyme into a dimer…	hsa01522 (Endocrine resistance), hsa04010 (MAPK signaling pathway), hsa04014 (Ras signaling pathway), hsa04020 (Calcium signaling pathway), hsa04024 (cAMP signaling pathway), hsa04062 (Chemokine signaling pathway), hsa04114 (Oocyte meiosis), hsa04140 (Autophagy - animal), hsa04211 (Longevity regulating pathway), hsa04213 (Longevity regulating pathway - multiple species), hsa04261 (Adrenergic sign…			0.250901	-0.00318482		0.075656	0.00114982	-0.075892		-0.226545	-0.0881184	0.0660333					50.6094	86.8207	52.1923	-0.207203	6.86228	2.84797	0.11794	0.349285	0.156879	0.367879	0.469732	-0.52915	-0.605988	0.177489	0.111293		137.962	115.36	121.952	115.714	109.592	98.5272	108.651	121.128
ENSG00000062716	VMP1	PC	vacuole membrane protein 1		hsa04140 (Autophagy - animal), hsa05205 (Proteoglycans in cancer), hsa05206 (MicroRNAs in cancer), GO:0006887 (exocytosis), GO:0006914 (autophagy), GO:0007029 (endoplasmic reticulum organization), GO:0007030 (Golgi organization), GO:0007566 (embryo implantation), GO:0010506 (regulation of autophagy), GO:0016337 (single organismal cell-cell adhesion), GO:0034329 (cell junction assembly), GO:000040…			0.138221	0.217744		-0.130605	0.0642178	-0.113327		-0.232631	0.00742983	0.0489506					49.8868	59.933	22.2761	-0.228869	4.92948	2.27495	0.157998	0.409948	0.197974	0.133469	0.23887	-0.64254	-0.623582	0.085764	0.0985281		33.3133	35.3144	27.3098	31.5475	27.663	25.3087	30.2527	31.1944
ENSG00000006715	VPS41	PC	VPS41, HOPS complex subunit	Vesicle mediated protein sorting plays an important role in segregation of intracellular molecules into distinct organelles. Genetic studies in yeast have identified more than 40 vacuolar protein sorting (VPS) genes involved in vesicle transport to vacuoles. This gene encodes the human ortholog of yeast Vps41 protein which is also conserved in Drosophila, tomato, and Arabidopsis. Expression studi…	GO:0006623 (protein targeting to vacuole), GO:0006914 (autophagy), GO:0008333 (endosome to lysosome transport), GO:0034058 (endosomal vesicle fusion), GO:0035542 (regulation of SNARE complex assembly), GO:0042144 (vacuole fusion, non-autophagic), GO:0045055 (regulated secretory pathway), GO:1902774 (late endosome to lysosome transport), GO:0005765 (lysosomal membrane), GO:0005769 (early endosome)…			0.0221314	-0.231178		-0.20232	-0.321385	0.194784		0.339184	0.0820077	0.116776					49.8606	35.4446	32.8275	0.355104	3.59285	2.41852	0.146528	0.393333	0.159008	0.249352	0.35404	0.604743	0.56528	0.11223	0.144244		11.8892	9.65261	9.88803	8.94632	13.6549	15.3029	12.4778	12.8309
ENSG00000106617	PRKAG2	PC	protein kinase AMP-activated non-catalytic subunit gamma 2	AMP-activated protein kinase (AMPK) is a heterotrimeric protein composed of a catalytic alpha subunit, a noncatalytic beta subunit, and a noncatalytic regulatory gamma subunit. Various forms of each of these subunits exist, encoded by different genes. AMPK is an important energy-sensing enzyme that monitors cellular energy status and functions by inactivating key enzymes involved in regulating de…	hsa04068 (FoxO signaling pathway), hsa04152 (AMPK signaling pathway), hsa04211 (Longevity regulating pathway), hsa04213 (Longevity regulating pathway - multiple species), hsa04371 (Apelin signaling pathway), hsa04530 (Tight junction), hsa04710 (Circadian rhythm), hsa04714 (Thermogenesis), hsa04910 (Insulin signaling pathway), hsa04920 (Adipocytokine signaling pathway), hsa04921 (Oxytocin signalin…			-0.217547	0.117486		-0.14486	-0.244101	-0.0364535		0.281609	0.0751535	0.168713					49.8114	68.5515	38.8619	0.260102	5.4467	2.63535	0.131124	0.368037	0.154621	0.128022	0.23887	0.554348	0.564264	0.153907	0.145127		36.727	46.8504	38.7281	36.0207	41.9064	52.7362	45.4379	48.6162
ENSG00000172803	SNX32	PC	sorting nexin 32		hsa04144 (Endocytosis), GO:0006897 (endocytosis), GO:0015031 (protein transport), GO:0016050 (vesicle organization), GO:0016241 (regulation of macroautophagy), GO:0005768 (endosome), GO:0019898 (extrinsic component of membrane), GO:0005515 (protein binding), GO:0035091 (phosphatidylinositol binding)			-0.107048	-0.500264		0.300022	0.0415679	0.0696594		0.0390991	-0.0860109	0.242974					49.7131	97.7329	37.4857	0.320847	9.0767	3.46906	0.0878144	0.301426	0.0909426	0.0956344	0.23887	0.415761	0.533118	0.305624	0.173654		494.873	376.334	656.848	548.786	559.616	547.844	502.171	631.304
ENSG00000156171	DRAM2	PC	DNA damage regulated autophagy modulator 2		GO:0006914 (autophagy), GO:0006915 (apoptotic process), GO:0007601 (visual perception), GO:0010506 (regulation of autophagy), GO:0045494 (photoreceptor cell maintenance), GO:0001917 (photoreceptor inner segment), GO:0005737 (cytoplasm), GO:0005764 (lysosome), GO:0005765 (lysosomal membrane), GO:0005794 (Golgi apparatus), GO:0016021 (integral component of membrane), GO:0016324 (apical plasma membr…			0.554184	0.988841		-0.423555	-0.491737	-0.423555		-0.217075	0.309052	-0.296157					49.6651	28.361	23.1936	-0.905701	3.20569	5.17561	0.0425801	0.212264	0.0292782	0.0423134	0.23887	-0.266164	-0.601129	0.524011	0.114975		13.0663	18.3635	5.65031	5.29716	5.65031	6.82745	10.712	6.35659
ENSG00000160803	UBQLN4	PC	ubiquilin 4		hsa04141 (Protein processing in endoplasmic reticulum), GO:0006914 (autophagy), GO:0032434 (regulation of proteasomal ubiquitin-dependent protein catabolic process), GO:1901097 (negative regulation of autophagic vacuole maturation), GO:0005634 (nucleus), GO:0005737 (cytoplasm), GO:0005776 (autophagic vacuole), GO:0005789 (endoplasmic reticulum membrane), GO:0005829 (cytosol), GO:0031410 (cytoplas…			-0.0211597	-0.346342		0.0788114	-0.0738691	-0.107818		0.416362	0.392275	-0.338259					49.6094	55.1606	57.8209	0.408545	4.66407	3.18161	0.100405	0.321763	0.101867	0.485672	0.577441	0.453557	0.529457	0.259011	0.177191		24.2492	18.9521	26.1327	23.3075	22.7189	33.5487	32.9601	19.0698
ENSG00000138942	RNF185	PC	ring finger protein 185		hsa04141 (Protein processing in endoplasmic reticulum), GO:0006914 (autophagy), GO:0030433 (ER-associated ubiquitin-dependent protein catabolic process), GO:0036503 (NA), GO:0042787 (protein ubiquitination involved in ubiquitin-dependent protein catabolic process), GO:0051865 (protein autoubiquitination), GO:0055085 (transmembrane transport), GO:0071712 (ER-associated misfolded protein catabolic …			-0.155223	-0.211494		0.283294	-0.211494	-0.0055793		0.205611	-0.0415603	0.136446					49.2759	52.0642	81.0234	0.299436	4.48607	2.593	0.133967	0.372949	0.159902	0.293345	0.396774	0.55134	0.57473	0.156626	0.136168		19.5406	18.7166	27.1921	18.7166	21.8949	25.6618	21.3064	24.3669
ENSG00000141458	NPC1	PC	NPC intracellular cholesterol transporter 1	This gene encodes a large protein that resides in the limiting membrane of endosomes and lysosomes and mediates intracellular cholesterol trafficking via binding of cholesterol to its N-terminal domain. It is predicted to have a cytoplasmic C-terminus, 13 transmembrane domains, and 3 large loops in the lumen of the endosome - the last loop being at the N-terminus. This protein transports low-dens…	hsa04142 (Lysosome), hsa04979 (Cholesterol metabolism), GO:0006486 (protein glycosylation), GO:0006898 (receptor-mediated endocytosis), GO:0006914 (autophagy), GO:0007041 (lysosomal transport), GO:0007165 (signal transduction), GO:0007628 (adult walking behavior), GO:0008203 (cholesterol metabolic process), GO:0008206 (bile acid metabolic process), GO:0016242 (negative regulation of macroautophag…			0.25101	-0.144712		0.200084	0.182702	-0.00870092		-0.0543452	-0.264773	-0.161264					49.1895	61.7414	51.0454	-0.26702	5.03231	2.30298	0.155671	0.406889	0.183814	0.149154	0.252534	-0.617342	-0.527042	0.102954	0.179544		38.7281	28.9578	37.3156	36.8447	32.0184	30.959	26.4858	28.6047
ENSG00000116586	LAMTOR2	PC	late endosomal/lysosomal adaptor, MAPK and MTOR activator 2	The product of this gene is highly conserved with a mouse protein associated with the cytoplasmic face of late endosomes and lysosomes. The mouse protein interacts with MAPK scaffold protein 1, a component of the mitogen-activated protein kinase pathway. In humans, a mutation in this gene has been associated with a primary immunodeficiency syndrome, and suggests a role for this protein in endosom…	hsa04150 (mTOR signaling pathway), GO:0000165 (MAPK cascade), GO:0000186 (activation of MAPKK activity), GO:0007050 (cell cycle arrest), GO:0016049 (cell growth), GO:0016236 (macroautophagy), GO:0032008 (positive regulation of TOR signaling), GO:0034613 (cellular protein localization), GO:0043312 (neutrophil degranulation), GO:0043547 (positive regulation of GTPase activity), GO:0071230 (cellular…			-0.216144	-0.0984913		0.00705878	0.0310912	0.108425		0.188963	-0.124803	0.1039					48.384	85.0124	6.71372	0.20647	6.69	2.73467	0.124748	0.358465	0.167336	0.249352	0.35404	0.503953	0.604603	0.202884	0.112335		88.0506	95.702	103.118	104.884	110.77	117.244	93.9363	110.416
ENSG00000215305	VPS16	PC	VPS16, CORVET/HOPS core subunit	Vesicle mediated protein sorting plays an important role in segregation of intracellular molecules into distinct organelles. Genetic studies in yeast have identified more than 40 vacuolar protein sorting (VPS) genes involved in vesicle transport to vacuoles. This gene encodes the human homolog of yeast class C Vps16 protein. The mammalian class C Vps proteins are predominantly associated with lat…	GO:0006886 (intracellular protein transport), GO:0008333 (endosome to lysosome transport), GO:0032889 (regulation of vacuole fusion, non-autophagic), GO:0035542 (regulation of SNARE complex assembly), GO:0097352 (autophagic vacuole maturation), GO:0005764 (lysosome), GO:0005765 (lysosomal membrane), GO:0005769 (early endosome), GO:0005770 (late endosome), GO:0005776 (autophagic vacuole), GO:00301…			0.0389271	0.0505855		0.172971	-0.0704686	0.137879		-0.10562	-0.102389	-0.121885					47.8075	73.4651	46.6255	-0.179336	5.77833	1.92012	0.191688	0.451386	0.253639	0.0765781	0.23887	-0.692935	-0.599112	0.0567364	0.116523		56.0322	56.5031	61.6825	51.7945	60.1522	50.4996	50.6173	49.911
ENSG00000196821	C6orf106	PC	chromosome 6 open reading frame 106		GO:0008150 (biological_process), GO:0016236 (macroautophagy), GO:0000407 (pre-autophagosomal structure), GO:0005575 (cellular_component), GO:0005776 (autophagic vacuole), GO:0003674 (molecular_function), GO:0043130 (ubiquitin binding)			-0.161394	-0.447155		0.142392	0.167287	0.176234		0.174002	-0.0269652	-0.0244004					46.0678	77.373	91.7159	0.299593	6.05068	2.99954	0.109539	0.336057	0.123642	0.0956344	0.23887	0.415761	0.548945	0.305624	0.15881		58.2688	47.439	72.3945	73.6894	74.1603	74.0425	64.1545	64.2722
ENSG00000115363	EVA1A	PC	eva-1 homolog A, regulator of programmed cell death		GO:0006914 (autophagy), GO:0006915 (apoptotic process), GO:0005765 (lysosomal membrane), GO:0005789 (endoplasmic reticulum membrane), GO:0005886 (plasma membrane), GO:0016021 (integral component of membrane), GO:0043231 (intracellular membrane-bounded organelle)			-0.105663	-0.0110213		-0.155419	-0.0975349	0.0117		0.240529	0.00416592	0.113243					46.0482	49.9735	18.3591	0.216231	4.37382	1.80571	0.204503	0.466629	0.254287	0.15124	0.252534	0.680336	0.633552	0.0633355	0.0916877		18.8344	20.2469	18.1281	18.9521	20.6001	24.4847	20.4824	22.2481
ENSG00000144848	ATG3	PC	autophagy related 3	This gene encodes a ubiquitin-like-conjugating enzyme and is a component of ubiquitination-like systems involved in autophagy, the process of degradation, turnover and recycling of cytoplasmic constituents in eukaryotic cells. This protein is known to play a role in regulation of autophagy during cell death. A pseudogene of this gene is located on chromosome 20. Alternative splicing results in mu…	hsa04136 (Autophagy - other), hsa04140 (Autophagy - animal), hsa05167 (Kaposi sarcoma-associated herpesvirus infection), GO:0000045 (autophagic vacuole assembly), GO:0000422 (mitochondrion degradation), GO:0006464 (cellular protein modification process), GO:0006612 (protein targeting to membrane), GO:0016236 (macroautophagy), GO:0016567 (protein ubiquitination), GO:0043653 (mitochondrial fragment…			0.399863	0.15446		-0.139157	-0.14142	-0.132389		0.0130747	-0.0858811	-0.068551					45.9098	81.4485	44.217	-0.300773	6.3506	4.5325	0.0552248	0.241827	0.0646505	0.0439369	0.23887	-0.264575	-0.637612	0.526586	0.0889835		107.12	90.0517	73.1008	72.9831	73.454	81.4586	75.926	76.8677
ENSG00000271601	LIX1L	PC	limb and CNS expressed 1 like		GO:0008150 (biological_process), GO:0097352 (autophagic vacuole maturation), GO:0005575 (cellular_component), GO:0005737 (cytoplasm), GO:0003674 (molecular_function)			0.396592	0.127912		-0.0800364	-0.0359796	-0.316486		-0.0523436	0.068613	-0.108271					45.6114	60.0565	95.9594	-0.278943	4.93712	2.4921	0.141057	0.385029	0.161796	0.119433	0.23887	-0.491354	-0.542155	0.216255	0.16509		40.2584	33.0778	28.3692	29.311	23.7784	28.9578	31.6653	27.7807
ENSG00000145354	CISD2	PC	CDGSH iron sulfur domain 2	The protein encoded by this gene is a zinc finger protein that localizes to the endoplasmic reticulum. The encoded protein binds an iron/sulfur cluster and may be involved in calcium homeostasis. Defects in this gene are a cause of Wolfram syndrome 2. [provided by RefSeq, Mar 2011]. Sequence Note: This RefSeq record was created from transcript and genomic sequence data to make the sequence consis…	GO:0000422 (mitochondrion degradation), GO:0010259 (multicellular organismal aging), GO:0010506 (regulation of autophagy), GO:0005741 (mitochondrial outer membrane), GO:0005783 (endoplasmic reticulum), GO:0005789 (endoplasmic reticulum membrane), GO:0016020 (membrane), GO:0016021 (integral component of membrane), GO:0043234 (protein complex), GO:0003723 (RNA binding), GO:0005515 (protein binding)…			0.501553	0.00575519		-0.0908251	-0.159002	0.00575519		-0.318796	0.26187	-0.206311					45.4617	41.2844	36.4005	-0.35695	3.88635	2.19898	0.16453	0.417158	0.174848	0.293345	0.396774	-0.55134	-0.484239	0.156626	0.224002		21.0709	14.3612	13.3018	12.5955	14.3612	11.0652	17.5395	12.1246
ENSG00000075785	RAB7A	PC	RAB7A, member RAS oncogene family	RAB family members are small, RAS-related GTP-binding proteins that are important regulators of vesicular transport. Each RAB protein targets multiple proteins that act in exocytic / endocytic pathways. This gene encodes a RAB family member that regulates vesicle traffic in the late endosomes and also from late endosomes to lysosomes. This encoded protein is also involved in the cellular vacuolat…	hsa04137 (Mitophagy - animal), hsa04140 (Autophagy - animal), hsa04144 (Endocytosis), hsa04145 (Phagosome), hsa05132 (Salmonella infection), hsa05146 (Amoebiasis), hsa05152 (Tuberculosis), GO:0000045 (autophagic vacuole assembly), GO:0006622 (protein targeting to lysosome), GO:0006897 (endocytosis), GO:0007174 (epidermal growth factor catabolic process), GO:0008333 (endosome to lysosome transport…			0.664154	0.206203		-0.417391	-0.175948	-0.183061		-0.036294	-0.0192203	-0.0384425					44.8172	81.4044	14.442	-0.435813	6.3446	4.34179	0.0598162	0.250814	0.0517541	0.0439369	0.23887	-0.264575	-0.556036	0.526586	0.152392		126.543	91.582	58.7396	69.8048	69.4517	77.1031	78.0448	76.9854
ENSG00000110321	EIF4G2	PC	eukaryotic translation initiation factor 4 gamma 2	Translation initiation is mediated by specific recognition of the cap structure by eukaryotic translation initiation factor 4F (eIF4F), which is a cap binding protein complex that consists of three subunits: eIF4A, eIF4E and eIF4G. The protein encoded by this gene shares similarity with the C-terminal region of eIF4G that contains the binding sites for eIF4A and eIF3; eIF4G, in addition, contains…	hsa03013 (RNA transport), hsa05416 (Viral myocarditis), GO:0006413 (translational initiation), GO:0006446 (regulation of translational initiation), GO:0007050 (cell cycle arrest), GO:0008219 (cell death), GO:0010507 (negative regulation of autophagy), GO:0030307 (positive regulation of cell growth), GO:0034645 (cellular macromolecule biosynthetic process), GO:0005829 (cytosol), GO:0005913 (cell-c…			0.0866958	0.364276		-0.0425779	-0.0628731	-0.189187		-0.255398	-0.00834391	0.107409					44.7387	98.9591	43.0437	-0.249488	10.0455	3.31987	0.0940895	0.31178	0.10927	0.199666	0.31515	-0.352767	-0.55018	0.391388	0.157681		1113.23	1349.83	1017.64	1003.4	919.116	877.798	1042.13	1129.35
ENSG00000168397	ATG4B	PC	autophagy related 4B cysteine peptidase	Autophagy is the process by which endogenous proteins and damaged organelles are destroyed intracellularly. Autophagy is postulated to be essential for cell homeostasis and cell remodeling during differentiation, metamorphosis, non-apoptotic cell death, and aging. Reduced levels of autophagy have been described in some malignant tumors, and a role for autophagy in controlling the unregulated cell…	hsa04136 (Autophagy - other), hsa04140 (Autophagy - animal), GO:0000045 (autophagic vacuole assembly), GO:0000422 (mitochondrion degradation), GO:0006501 (C-terminal protein lipidation), GO:0006508 (proteolysis), GO:0006612 (protein targeting to membrane), GO:0006914 (autophagy), GO:0016236 (macroautophagy), GO:0044804 (nucleophagy), GO:0045732 (positive regulation of protein catabolic process), …			-0.439814	-0.305151		0.0700929	0.186425	0.294073		0.155617	0.0478955	-0.00913985					43.6487	37.6941	30.1279	0.435146	3.71265	3.27925	0.0958931	0.314006	0.102814	0.0685251	0.23887	0.340168	0.60337	0.40968	0.113268		8.8286	9.88803	13.4195	14.7143	16.0092	14.3612	13.184	12.5955
ENSG00000178607	ERN1	PC	endoplasmic reticulum to nucleus signaling 1	The protein encoded by this gene is the ER to nucleus signalling 1 protein, a human homologue of the yeast Ire1 gene product. This protein possesses intrinsic kinase activity and an endoribonuclease activity and it is important in altering gene expression as a response to endoplasmic reticulum-based stress signals. [provided by RefSeq, Jul 2008]. Publication Note: This RefSeq record includes a su…	hsa04140 (Autophagy - animal), hsa04141 (Protein processing in endoplasmic reticulum), hsa04210 (Apoptosis), hsa04932 (Non-alcoholic fatty liver disease (NAFLD)), hsa05010 (Alzheimer disease), GO:0001935 (endothelial cell proliferation), GO:0006351 (transcription, DNA-templated), GO:0006355 (regulation of transcription, DNA-templated), GO:0006379 (mRNA cleavage), GO:0006402 (mRNA catabolic proces…			0.228181	0.155413		0.0253295	-0.0879028	0.297455		0.104778	-0.748583	0.0253295					43.4462	9.58892	60.1853	-0.529212	2.16603	1.97412	0.186001	0.444497	0.169006	0.324815	0.42701	-0.557677	-0.542662	0.150927	0.164617		5.17945	4.8263	4.23773	3.76687	5.53259	4.59087	1.64801	4.23773
ENSG00000116903	EXOC8	PC	exocyst complex component 8		GO:0001927 (exocyst assembly), GO:0007032 (endosome organization), GO:0015031 (protein transport), GO:0016241 (regulation of macroautophagy), GO:0022617 (extracellular matrix disassembly), GO:0051601 (exocyst localization), GO:0000145 (exocyst), GO:0005770 (late endosome), GO:0005829 (cytosol), GO:0005886 (plasma membrane), GO:0016020 (membrane), GO:0030426 (growth cone), GO:0005515 (protein bind…			0.529524	0.402397		-0.230923	-0.173196	-0.386234		0.176806	-0.145177	-0.173196					43.3464	13.1175	98.315	-0.622462	2.36869	3.59592	0.0828779	0.293675	0.0721333	0.0537348	0.23887	-0.304188	-0.603096	0.463855	0.113476		7.76917	6.94517	3.76687	4.0023	3.1783	5.65031	4.12001	4.0023
ENSG00000132155	RAF1	PC	Raf-1 proto-oncogene, serine/threonine kinase	This gene is the cellular homolog of viral raf gene (v-raf). The encoded protein is a MAP kinase kinase kinase (MAP3K), which functions downstream of the Ras family of membrane associated GTPases to which it binds directly. Once activated, the cellular RAF1 protein can phosphorylate to activate the dual specificity protein kinases MEK1 and MEK2, which in turn phosphorylate to activate the serine/…	hsa01521 (EGFR tyrosine kinase inhibitor resistance), hsa01522 (Endocrine resistance), hsa04010 (MAPK signaling pathway), hsa04012 (ErbB signaling pathway), hsa04014 (Ras signaling pathway), hsa04015 (Rap1 signaling pathway), hsa04022 (cGMP-PKG signaling pathway), hsa04024 (cAMP signaling pathway), hsa04062 (Chemokine signaling pathway), hsa04068 (FoxO signaling pathway), hsa04071 (Sphingolipid s…			-0.0909128	-0.161438		0.0734547	-0.00575328	0.0902166		0.0281943	0.0937832	-0.0275449					42.3461	88.3116	59.453	0.144161	7.04972	1.83488	0.201132	0.46295	0.277587	0.133469	0.23887	0.566947	0.641817	0.1428	0.0862318		123.836	117.832	139.021	131.487	140.669	134.666	141.022	129.486
ENSG00000186868	MAPT	PC	microtubule associated protein tau	This gene encodes the microtubule-associated protein tau (MAPT) whose transcript undergoes complex, regulated alternative splicing, giving rise to several mRNA species. MAPT transcripts are differentially expressed in the nervous system, depending on stage of neuronal maturation and neuron type. MAPT gene mutations have been associated with several neurodegenerative disorders such as Alzheimer_s …	hsa04010 (MAPK signaling pathway), hsa05010 (Alzheimer disease), GO:0000226 (microtubule cytoskeleton organization), GO:0001774 (microglial cell activation), GO:0006919 (activation of cysteine-type endopeptidase activity involved in apoptotic process), GO:0007165 (signal transduction), GO:0007613 (memory), GO:0010506 (regulation of autophagy), GO:0010917 (negative regulation of mitochondrial memb…			-0.324104	-0.354484		0.157106	0.178483	0.220309		0.30049	-0.10167	-0.0761301					42.2203	14.2378	92.9246	0.465571	2.433	2.12484	0.17124	0.427888	0.177466	0.119433	0.23887	0.491354	0.517904	0.216255	0.1886		3.64916	3.53144	5.88573	6.00345	6.23888	6.70974	4.59087	4.70859
ENSG00000174775	HRAS	PC	HRas proto-oncogene, GTPase	This gene belongs to the Ras oncogene family, whose members are related to the transforming genes of mammalian sarcoma retroviruses. The products encoded by these genes function in signal transduction pathways. These proteins can bind GTP and GDP, and they have intrinsic GTPase activity. This protein undergoes a continuous cycle of de- and re-palmitoylation, which regulates its rapid exchange bet…	hsa01521 (EGFR tyrosine kinase inhibitor resistance), hsa01522 (Endocrine resistance), hsa04010 (MAPK signaling pathway), hsa04012 (ErbB signaling pathway), hsa04014 (Ras signaling pathway), hsa04015 (Rap1 signaling pathway), hsa04062 (Chemokine signaling pathway), hsa04068 (FoxO signaling pathway), hsa04071 (Sphingolipid signaling pathway), hsa04072 (Phospholipase D signaling pathway), hsa04137 …			-0.637807	-0.21013		0.191149	0.288286	0.185607		-0.00505773	0.177254	0.0106982					42.101	90.8433	14.6361	0.405238	7.34395	3.87642	0.073114	0.275155	0.0681457	0.0439369	0.23887	0.264575	0.553985	0.526586	0.154233		101.705	137.491	182.222	195.053	181.516	158.797	180.457	160.563
ENSG00000147649	MTDH	PC	metadherin		GO:0000122 (negative regulation of transcription from RNA polymerase II promoter), GO:0010508 (positive regulation of autophagy), GO:0031663 (lipopolysaccharide-mediated signaling pathway), GO:0043066 (negative regulation of apoptotic process), GO:0043123 (positive regulation of I-kappaB kinase/NF-kappaB signaling), GO:0045766 (positive regulation of angiogenesis), GO:0051092 (positive regulation…			0.209741	0.654104		-0.0486167	-0.551232	-0.166477		0.0603377	0.136972	-0.294829					41.9005	10.3564	66.1844	-0.594981	2.20799	2.48538	0.141546	0.38572	0.131068	0.0956344	0.23887	-0.415761	-0.509691	0.305624	0.196943		5.17945	7.76917	4.0023	2.23658	3.53144	4.47316	4.8263	3.06058
ENSG00000136738	STAM	PC	signal transducing adaptor molecule	This gene encodes a member of the signal-transducing adaptor molecule family. These proteins mediate downstream signaling of cytokine receptors and also play a role in ER to Golgi trafficking by interacting with the coat protein II complex. The encoded protein also associates with hepatocyte growth factor-regulated substrate to form the endosomal sorting complex required for transport-0 (ESCRT-0)…	hsa04144 (Endocytosis), hsa04630 (JAK-STAT signaling pathway), GO:0006886 (intracellular protein transport), GO:0007165 (signal transduction), GO:0009967 (positive regulation of signal transduction), GO:0016197 (endosomal transport), GO:0016236 (macroautophagy), GO:0016579 (protein deubiquitination), GO:0036258 (multivesicular body assembly), GO:0042059 (negative regulation of epidermal growth fa…			-0.648936	0.463744		-0.432071	-0.214434	-0.157839		0.584773	0.481668	-0.0769047					41.2973	14.0702	25.6639	0.567999	2.42512	1.57944	0.233352	0.497431	0.225069	0.149154	0.252534	0.617342	0.405075	0.102954	0.319478		2.35429	7.41603	3.06058	3.88458	4.12001	8.24003	7.53374	4.47316
ENSG00000105976	MET	PC	MET proto-oncogene, receptor tyrosine kinase	The proto-oncogene MET product is the hepatocyte growth factor receptor and encodes tyrosine-kinase activity. The primary single chain precursor protein is post-translationally cleaved to produce the alpha and beta subunits, which are disulfide linked to form the mature receptor. Various mutations in the MET gene are associated with papillary renal carcinoma. Two transcript variants encoding diff…	hsa01521 (EGFR tyrosine kinase inhibitor resistance), hsa04010 (MAPK signaling pathway), hsa04014 (Ras signaling pathway), hsa04015 (Rap1 signaling pathway), hsa04151 (PI3K-Akt signaling pathway), hsa04360 (Axon guidance), hsa04510 (Focal adhesion), hsa04520 (Adherens junction), hsa05100 (Bacterial invasion of epithelial cells), hsa05120 (Epithelial cell signaling in Helicobacter pylori infection…			0.777506	0.21523		-0.204648	-0.435138	-0.304878		0.140974	-0.11396	-0.0750861					41.2815	75.6616	80.7322	-0.481275	5.92843	3.73856	0.0777261	0.284686	0.0661565	0.0439369	0.23887	-0.264575	-0.51701	0.526586	0.1895		101.941	68.3922	50.6173	42.8481	47.0859	64.8608	54.031	55.5613
ENSG00000104765	BNIP3L	PC	BCL2 interacting protein 3 like	This gene is a member of the BCL2/adenovirus E1B 19 kd-interacting protein (BNIP) family. It interacts with the E1B 19 kDa protein, which protects cells from virally-induced cell death. The encoded protein also interacts with E1B 19 kDa-like sequences of BCL2, another apoptotic protector. This protein counteracts the apoptotic inducer BNIP3 and may play a role in tumor suppression. [provided by R…	hsa04137 (Mitophagy - animal), GO:0010917 (negative regulation of mitochondrial membrane potential), GO:0016239 (positive regulation of macroautophagy), GO:0035694 (mitochondrial protein catabolic process), GO:0042981 (regulation of apoptotic process), GO:0043065 (positive regulation of apoptotic process), GO:0043066 (negative regulation of apoptotic process), GO:0051607 (defense response to viru…			0.338179	1.48982		-0.799421	-0.521405	-0.711948		0.0784036	0.097901	0.028475					41.261	44.7777	40.8381	-0.945737	4.07702	3.73514	0.077845	0.284937	0.0585	0.0439369	0.23887	-0.264575	-0.491226	0.526586	0.216393		18.7166	44.0253	7.41603	9.41718	8.0046	15.3029	15.5383	14.7143
ENSG00000163820	FYCO1	PC	FYVE and coiled-coil domain containing 1	This gene encodes a protein that contains a RUN domain, FYVE-type zinc finger domain and Golgi dynamics (GOLD) domain. The encoded protein plays a role in microtubule plus end-directed transport of autophagic vesicles through interactions with the small GTPase Rab7, phosphatidylinositol-3-phosphate (PI3P) and the autophagosome marker LC3. Mutations in this gene are a cause of autosomal recessive …	GO:0006458 ('de novo' protein folding), GO:0061077 (chaperone-mediated protein folding), GO:0072383 (plus-end-directed vesicle transport along microtubule), GO:1901098 (positive regulation of autophagic vacuole maturation), GO:0005764 (lysosome), GO:0005770 (late endosome), GO:0005776 (autophagic vacuole), GO:0005794 (Golgi apparatus), GO:0016020 (membrane), GO:0016021 (integral component of memb…			0.0743499	-0.252485		-0.0690242	-0.112749	0.00444317		0.239946	-0.0161685	0.131687					40.2828	41.3814	97.5562	0.2437	3.89351	1.72858	0.213779	0.476701	0.253601	0.259961	0.361497	0.541749	0.596195	0.16547	0.118783		15.4206	11.8892	13.7726	13.3018	14.5966	17.5395	14.3612	16.1269
ENSG00000111725	PRKAB1	PC	protein kinase AMP-activated non-catalytic subunit beta 1	The protein encoded by this gene is a regulatory subunit of the AMP-activated protein kinase (AMPK). AMPK is a heterotrimer consisting of an alpha catalytic subunit, and non-catalytic beta and gamma subunits. AMPK is an important energy-sensing enzyme that monitors cellular energy status. In response to cellular metabolic stresses, AMPK is activated, and thus phosphorylates and inactivates acetyl…	hsa04068 (FoxO signaling pathway), hsa04152 (AMPK signaling pathway), hsa04211 (Longevity regulating pathway), hsa04213 (Longevity regulating pathway - multiple species), hsa04371 (Apelin signaling pathway), hsa04530 (Tight junction), hsa04710 (Circadian rhythm), hsa04714 (Thermogenesis), hsa04910 (Insulin signaling pathway), hsa04920 (Adipocytokine signaling pathway), hsa04921 (Oxytocin signalin…			-0.0676049	-0.117731		0.00111108	0.0602758	-0.0535974		0.189564	-0.0397245	0.0277065					39.9862	53.2639	51.76	0.164978	4.55902	1.22953	0.28977	0.553476	0.357754	0.119433	0.23887	0.718132	0.64337	0.0448173	0.0852285		22.1304	21.3064	23.3075	24.3669	22.3658	26.839	22.6012	23.7784
ENSG00000135047	CTSL	PC	cathepsin L	The protein encoded by this gene is a lysosomal cysteine proteinase that plays a major role in intracellular protein catabolism. Its substrates include collagen and elastin, as well as alpha-1 protease inhibitor, a major controlling element of neutrophil elastase activity. The encoded protein has been implicated in several pathologic processes, including myofibril necrosis in myopathies and in my…	hsa04140 (Autophagy - animal), hsa04142 (Lysosome), hsa04145 (Phagosome), hsa04210 (Apoptosis), hsa04612 (Antigen processing and presentation), hsa05205 (Proteoglycans in cancer), hsa05323 (Rheumatoid arthritis), hsa05418 (Fluid shear stress and atherosclerosis), GO:0002224 (toll-like receptor signaling pathway), GO:0002250 (adaptive immune response), GO:0006508 (proteolysis), GO:0019882 (antigen…			0.044246	-0.234572		0.106276	-0.0654591	-0.0380395		0.127798	0.0755942	-0.0158436					39.0849	85.7445	38.5884	0.152568	6.7506	1.65935	0.222583	0.485559	0.28688	0.367879	0.469732	0.52915	0.546292	0.177489	0.161248		110.534	90.758	115.478	102.294	104.295	117.244	113.006	105.943
ENSG00000088986	DYNLL1	PC	dynein light chain LC8-type 1	Cytoplasmic dyneins are large enzyme complexes with a molecular mass of about 1,200 kD. They contain two force-producing heads formed primarily from dynein heavy chains, and stalks linking the heads to a basal domain, which contains a varying number of accessory intermediate chains. The complex is involved in intracellular transport and motility. The protein described in this record is a light ch…	hsa04962 (Vasopressin-regulated water reabsorption), GO:0000086 (G2/M transition of mitotic cell cycle), GO:0006351 (transcription, DNA-templated), GO:0006355 (regulation of transcription, DNA-templated), GO:0006888 (ER to Golgi vesicle-mediated transport), GO:0006915 (apoptotic process), GO:0016032 (viral process), GO:0016236 (macroautophagy), GO:0019886 (antigen processing and presentation of e…			0.30794	0.177463		-0.134473	-0.125609	-0.172611		0.0138211	-0.0194515	-0.0470797					39.0619	98.0505	10.8778	-0.22606	9.30152	3.37152	0.0918568	0.3078	0.114263	0.0439369	0.23887	-0.264575	-0.581387	0.526586	0.130634		776.682	709.349	571.034	574.565	556.084	633.07	618.591	606.819
ENSG00000094631	HDAC6	PC	histone deacetylase 6	Histones play a critical role in transcriptional regulation, cell cycle progression, and developmental events. Histone acetylation/deacetylation alters chromosome structure and affects transcription factor access to DNA. The protein encoded by this gene belongs to class II of the histone deacetylase/acuc/apha family. It contains an internal duplication of two catalytic domains which appear to fun…	hsa05034 (Alcoholism), hsa05203 (Viral carcinogenesis), GO:0000209 (protein polyubiquitination), GO:0006351 (transcription, DNA-templated), GO:0006476 (protein deacetylation), GO:0006515 (misfolded or incompletely synthesized protein catabolic process), GO:0006886 (intracellular protein transport), GO:0006914 (autophagy), GO:0007026 (negative regulation of microtubule depolymerization), GO:000963…			0.168225	0.0413772		-0.0298031	0.00298752	0.0445307		-0.161683	-0.213479	0.147844					38.7363	71.8066	33.6833	-0.177617	5.66407	1.67081	0.221093	0.484592	0.276051	0.362805	0.46944	-0.516551	-0.543714	0.189961	0.163636		56.7385	51.7945	49.2047	50.3819	51.9122	44.7316	43.0836	55.9145
ENSG00000176171	BNIP3	PC	BCL2 interacting protein 3	This gene is encodes a mitochondrial protein that contains a BH3 domain and acts as a pro-apoptotic factor. The encoded protein interacts with anti-apoptotic proteins, including the E1B 19 kDa protein and Bcl2. This gene is silenced in tumors by DNA methylation. [provided by RefSeq, Dec 2014]. Publication Note: This RefSeq record includes a subset of the publications that are available for this g…	hsa04068 (FoxO signaling pathway), hsa04137 (Mitophagy - animal), hsa04140 (Autophagy - animal), hsa05134 (Legionellosis), GO:0000422 (mitochondrion degradation), GO:0001666 (response to hypoxia), GO:0006915 (apoptotic process), GO:0008219 (cell death), GO:0008626 (granzyme-mediated apoptotic signaling pathway), GO:0010508 (positive regulation of autophagy), GO:0010637 (negative regulation of mit…			0.47923	-0.255755		0.0921891	0.169361	-0.058062		-0.0319082	-0.328169	-0.0668864					38.4075	47.2036	71.4777	-0.336162	4.21829	2.14396	0.169477	0.425041	0.183767	0.388896	0.486699	-0.403162	-0.471923	0.321989	0.237744		26.0149	14.8321	19.4229	20.6001	17.3041	17.6572	14.008	17.1863
ENSG00000113734	BNIP1	PC	BCL2 interacting protein 1	This gene is a member of the BCL2/adenovirus E1B 19 kd-interacting protein (BNIP) family. It interacts with the E1B 19 kDa protein, which protects cells from virally-induced cell death. The encoded protein also interacts with E1B 19 kDa-like sequences of BCL2, another apoptotic protector. In addition, this protein is involved in vesicle transport into the endoplasmic reticulum. Alternative splici…	hsa04130 (SNARE interactions in vesicular transport), GO:0006890 (retrograde vesicle-mediated transport, Golgi to ER), GO:0006914 (autophagy), GO:0006915 (apoptotic process), GO:0007029 (endoplasmic reticulum organization), GO:0016320 (endoplasmic reticulum membrane fusion), GO:0043066 (negative regulation of apoptotic process), GO:0097194 (execution phase of apoptosis), GO:0005635 (nuclear envel…			-0.129045	0.0439447		0.0275498	-0.161572	-0.0882743		0.187368	0.0801659	0.0398634					38.3991	65.861	30.1897	0.167759	5.27695	1.51304	0.242834	0.507305	0.304521	0.128022	0.23887	0.554348	0.578096	0.153907	0.133354		34.9613	39.6699	39.199	34.1373	36.0207	44.0253	40.7293	39.5521
ENSG00000144566	RAB5A	PC	RAB5A, member RAS oncogene family		hsa04014 (Ras signaling pathway), hsa04144 (Endocytosis), hsa04145 (Phagosome), hsa04962 (Vasopressin-regulated water reabsorption), hsa05014 (Amyotrophic lateral sclerosis (ALS)), hsa05146 (Amoebiasis), hsa05152 (Tuberculosis), GO:0006661 (phosphatidylinositol biosynthetic process), GO:0006897 (endocytosis), GO:0006909 (phagocytosis), GO:0007596 (blood coagulation), GO:0015031 (protein transport…			-0.0115489	0.159937		-0.294337	-0.548323	-0.277397		0.533986	0.294426	0.143257					37.7814	63.9908	31.8659	0.350745	5.16485	1.94139	0.189421	0.448283	0.188966	0.0621765	0.23887	0.42836	0.441187	0.289668	0.27385		34.3727	38.9636	27.8984	23.0721	28.2515	51.0882	42.9659	38.4927
ENSG00000117758	STX12	PC	syntaxin 12		hsa04145 (Phagosome), GO:0000045 (autophagic vacuole assembly), GO:0006886 (intracellular protein transport), GO:0006906 (vesicle fusion), GO:0033344 (cholesterol efflux), GO:0048278 (vesicle docking), GO:0050821 (protein stabilization), GO:0000139 (Golgi membrane), GO:0000407 (pre-autophagosomal structure), GO:0010008 (endosome membrane), GO:0012505 (endomembrane system), GO:0016021 (integral co…			-0.403065	0.169882		-0.201409	0.0432376	-0.15511		0.474759	0.0824117	-0.0107061					37.515	33.0363	27.3666	0.368422	3.4428	2.04016	0.17934	0.436079	0.188882	0.388896	0.486699	0.403162	0.486844	0.321989	0.22115		7.41603	12.0069	8.8286	10.8298	9.18175	15.3029	11.1829	10.3589
ENSG00000112977	DAP	PC	death associated protein	This gene encodes a basic, proline-rich, 15-kD protein. The protein acts as a positive mediator of programmed cell death that is induced by interferon-gamma. Alternatively spliced transcript variants encoding distinct isoforms have been found for this gene. [provided by RefSeq, May 2014].	GO:0006914 (autophagy), GO:0006915 (apoptotic process), GO:0006919 (activation of cysteine-type endopeptidase activity involved in apoptotic process), GO:0010507 (negative regulation of autophagy), GO:0032088 (negative regulation of NF-kappaB transcription factor activity), GO:0034198 (cellular response to amino acid starvation), GO:0045892 (negative regulation of transcription, DNA-templated), G…			-0.250962	-0.102577		0.176236	0.0566358	0.0613634		-0.020359	-0.012058	0.0917208					37.2231	92.8987	21.3851	0.168119	7.68558	1.94155	0.189404	0.448283	0.242915	0.0956344	0.23887	0.415761	0.517424	0.305624	0.189083		171.863	190.698	231.78	213.181	213.888	201.998	203.176	218.478
ENSG00000100219	XBP1	PC	X-box binding protein 1	This gene encodes a transcription factor that regulates MHC class II genes by binding to a promoter element referred to as an X box. This gene product is a bZIP protein, which was also identified as a cellular transcription factor that binds to an enhancer in the promoter of the T cell leukemia virus type 1 promoter. It may increase expression of viral proteins by acting as the DNA binding partne…	hsa04141 (Protein processing in endoplasmic reticulum), hsa04932 (Non-alcoholic fatty liver disease (NAFLD)), GO:0001525 (angiogenesis), GO:0001889 (liver development), GO:0001935 (endothelial cell proliferation), GO:0002639 (positive regulation of immunoglobulin production), GO:0006366 (transcription from RNA polymerase II promoter), GO:0006511 (ubiquitin-dependent protein catabolic process), GO…			0.173075	-0.000130996		-0.00468216	-0.0369488	0.0179314		-0.0230318	-0.128351	0.00213921					37.204	79.3225	57.3445	-0.137137	6.19182	1.5258	0.240973	0.504735	0.322565	0.362805	0.46944	-0.516551	-0.660229	0.189961	0.0747707		82.2826	72.7477	72.5123	70.8642	73.6894	71.5705	66.3911	72.8654
ENSG00000169032	MAP2K1	PC	mitogen-activated protein kinase kinase 1	The protein encoded by this gene is a member of the dual specificity protein kinase family, which acts as a mitogen-activated protein (MAP) kinase kinase. MAP kinases, also known as extracellular signal-regulated kinases (ERKs), act as an integration point for multiple biochemical signals. This protein kinase lies upstream of MAP kinases and stimulates the enzymatic activity of MAP kinases upon w…	hsa01521 (EGFR tyrosine kinase inhibitor resistance), hsa01522 (Endocrine resistance), hsa04010 (MAPK signaling pathway), hsa04012 (ErbB signaling pathway), hsa04014 (Ras signaling pathway), hsa04015 (Rap1 signaling pathway), hsa04022 (cGMP-PKG signaling pathway), hsa04024 (cAMP signaling pathway), hsa04062 (Chemokine signaling pathway), hsa04066 (HIF-1 signaling pathway), hsa04068 (FoxO signalin…			-0.368814	0.0236086		0.359281	-0.239493	-0.0467975		0.0907381	0.0907381	0.0907381					36.9715	1.38497	75.0596	0.400969	1.65483	1.24687	0.286558	0.550341	0.294492	0.2731	0.37907	0.606767	0.435575	0.110709	0.280717		1.76572	2.94287	4.23773	2.11886	2.70744	3.1783	3.1783	3.1783
ENSG00000129355	CDKN2D	PC	cyclin dependent kinase inhibitor 2D	The protein encoded by this gene is a member of the INK4 family of cyclin-dependent kinase inhibitors. This protein has been shown to form a stable complex with CDK4 or CDK6, and prevent the activation of the CDK kinases, thus function as a cell growth regulator that controls cell cycle G1 progression. The abundance of the transcript of this gene was found to oscillate in a cell-cycle dependent m…	hsa04068 (FoxO signaling pathway), hsa04110 (Cell cycle), GO:0000079 (regulation of cyclin-dependent protein serine/threonine kinase activity), GO:0000082 (G1/S transition of mitotic cell cycle), GO:0000731 (DNA synthesis involved in DNA repair), GO:0007050 (cell cycle arrest), GO:0008285 (negative regulation of cell proliferation), GO:0009411 (response to UV), GO:0030308 (negative regulation of …			-0.328007	-0.105604		0.198946	-0.00296458	0.121539		0.0517148	-0.034262	0.0986377					36.7737	55.6722	39.6824	0.236502	4.69309	1.8914	0.194804	0.455591	0.236048	0.0956344	0.23887	0.415761	0.555226	0.305624	0.153118		19.8938	23.5429	29.5464	25.4264	27.8984	26.4858	24.8378	27.4275
ENSG00000070540	WIPI1	PC	WD repeat domain, phosphoinositide interacting 1	WD40 repeat proteins are key components of many essential biologic functions. They regulate the assembly of multiprotein complexes by presenting a beta-propeller platform for simultaneous and reversible protein-protein interactions. Members of the WIPI subfamily of WD40 repeat proteins, such as WIPI1, have a 7-bladed propeller structure and contain a conserved motif for interaction with phospholi…	hsa04136 (Autophagy - other), hsa04140 (Autophagy - animal), GO:0006914 (autophagy), GO:0016236 (macroautophagy), GO:0036498 (NA), GO:0048203 (vesicle targeting, trans-Golgi to endosome), GO:0000139 (Golgi membrane), GO:0000407 (pre-autophagosomal structure), GO:0000421 (autophagic vacuole membrane), GO:0005737 (cytoplasm), GO:0005802 (trans-Golgi network), GO:0005829 (cytosol), GO:0005856 (cytos…			-0.056898	-0.0316304		0.0745725	-0.114095	-0.162641		0.0176148	0.0652344	0.207843					36.4349	61.9619	29.7927	0.166838	5.04394	1.37667	0.264002	0.529686	0.325191	0.259961	0.361497	0.541749	0.559105	0.16547	0.14966		31.3121	31.9007	34.4904	30.0172	28.9578	33.0778	34.255	38.0218
ENSG00000179364	PACS2	PC	phosphofurin acidic cluster sorting protein 2		GO:0000045 (autophagic vacuole assembly), GO:0006915 (apoptotic process), GO:0016032 (viral process), GO:0034497 (protein localization to pre-autophagosomal structure), GO:0072661 (protein targeting to plasma membrane), GO:0005739 (mitochondrion), GO:0005783 (endoplasmic reticulum), GO:0005788 (endoplasmic reticulum lumen), GO:0044325 (ion channel binding)			-0.334052	-0.466172		0.202056	0.164251	0.377512		-0.116796	0.321365	-0.148164					36.3875	31.5808	76.2594	0.424007	3.37075	1.8486	0.199571	0.461056	0.204416	0.0956344	0.23887	0.415761	0.429678	0.305624	0.288022		7.41603	6.59202	11.6538	11.3006	13.4195	8.94632	12.8309	8.71089
ENSG00000168701	TMEM208	PC	transmembrane protein 208		GO:0006624 (vacuolar protein processing), GO:0006914 (autophagy), GO:0005773 (vacuole), GO:0005789 (endoplasmic reticulum membrane), GO:0016021 (integral component of membrane)			-0.298167	-0.20859		0.156128	0.075207	0.218466		0.133467	-0.018961	-0.05755					36.2174	81.0956	12.0865	0.233847	6.32435	2.26451	0.158876	0.411127	0.189269	0.0685251	0.23887	0.340168	0.498912	0.40968	0.208181		64.1545	68.3922	88.6392	83.6951	92.6415	87.2266	78.2803	76.1614
ENSG00000164938	TP53INP1	PC	tumor protein p53 inducible nuclear protein 1		GO:0000045 (autophagic vacuole assembly), GO:0006351 (transcription, DNA-templated), GO:0006915 (apoptotic process), GO:0006950 (response to stress), GO:0007050 (cell cycle arrest), GO:0008285 (negative regulation of cell proliferation), GO:0009408 (response to heat), GO:0010508 (positive regulation of autophagy), GO:0010629 (negative regulation of gene expression), GO:0030336 (negative regulatio…			0.391824	0.107338		0.107338	-0.133703	-0.178104		0.361124	-0.477715	-0.178104					36.1613	20.6863	98.9413	-0.374248	2.78988	1.42997	0.255441	0.519592	0.260613	0.305914	0.411955	-0.516437	-0.429927	0.190076	0.287711		9.18175	7.1806	7.1806	5.76802	5.53259	8.94632	4.12001	5.53259
ENSG00000141569	TRIM65	PC	tripartite motif containing 65		GO:0010508 (positive regulation of autophagy), GO:0005634 (nucleus), GO:0005654 (nucleoplasm), GO:0005829 (cytosol), GO:0008270 (zinc ion binding)			-0.12045	-0.169641		0.137214	-0.034406	0.075224		0.0177929	0.14394	-0.0496735					35.9193	50.6175	30.1103	0.181671	4.40622	1.26198	0.283797	0.546758	0.344876	0.133469	0.23887	0.566947	0.584459	0.1428	0.128124		19.0698	18.3635	23.1898	20.3646	22.1304	21.1886	23.3075	20.1292
ENSG00000169252	ADRB2	PC	adrenoceptor beta 2	This gene encodes beta-2-adrenergic receptor which is a member of the G protein-coupled receptor superfamily. This receptor is directly associated with one of its ultimate effectors, the class C L-type calcium channel Ca(V)1.2. This receptor-channel complex also contains a G protein, an adenylyl cyclase, cAMP-dependent kinase, and the counterbalancing phosphatase, PP2A. The assembly of the signal…	hsa04020 (Calcium signaling pathway), hsa04022 (cGMP-PKG signaling pathway), hsa04024 (cAMP signaling pathway), hsa04080 (Neuroactive ligand-receptor interaction), hsa04261 (Adrenergic signaling in cardiomyocytes), hsa04923 (Regulation of lipolysis in adipocytes), hsa04924 (Renin secretion), hsa04970 (Salivary secretion), GO:0002024 (diet induced thermogenesis), GO:0002025 (vasodilation by norepi…			0.341794	0.0432404		-0.0959387	-0.0959387	-0.0421609		-0.132938	-0.0777891	0.0597304					35.3915	25.3088	93.4098	-0.28204	3.04007	1.67195	0.220945	0.484577	0.249992	0.231808	0.342764	-0.430932	-0.594114	0.28646	0.12041		10.5943	8.24003	7.29831	7.29831	7.65146	7.06288	7.41603	8.35774
ENSG00000141580	WDR45B	PC	WD repeat domain 45B	This gene encodes a member of the WIPI or SVP1 family of WD40 repeat-containing proteins. The protein contains seven WD40 repeats that are thought to fold into a beta-propeller structure that mediates protein-protein interactions, and a conserved motif for interaction with phospholipids. The human genome contains several pseudogenes of this gene. [provided by RefSeq, Jul 2008].	R-HSA-1632852 (Homo sapiens: Macroautophagy), R-HSA-2262752 (Homo sapiens: Cellular responses to stress)			-0.336855	0.0398941		0.117354	0.0354663	0.00106103		-0.138717	0.14502	0.136776					35.3802	86.1944	28.6281	0.177927	6.79371	1.57768	0.233597	0.497661	0.276952	0.485672	0.577441	0.453557	0.45819	0.259011	0.253561		86.7557	113.242	119.598	112.888	110.181	99.8221	121.952	121.246
ENSG00000174903	RAB1B	PC	RAB1B, member RAS oncogene family	Members of the RAB protein family, such as RAB1B, are low molecular mass monomeric GTPases localized on the cytoplasmic surfaces of distinct membrane-bound organelles. RAB1B functions in the early secretory pathway and is essential for vesicle transport between the endoplasmic reticulum (ER) and Golgi (Chen et al., 1997 [PubMed 9030196]; Alvarez et al., 2003 [PubMed 12802079]).[supplied by OMIM, …	hsa05134 (Legionellosis), GO:0006888 (ER to Golgi vesicle-mediated transport), GO:0006890 (retrograde vesicle-mediated transport, Golgi to ER), GO:0006914 (autophagy), GO:0015031 (protein transport), GO:0019068 (virion assembly), GO:0048208 (COPII vesicle coating), GO:1903020 (positive regulation of glycoprotein metabolic process), GO:2000785 (regulation of autophagic vacuole assembly), GO:000013…			-0.266429	0.302905		0.114079	0.228842	0.0764292		-0.396524	-0.0472463	-0.0120565					34.9969	87.006	53.6392	-0.222261	6.88059	1.44706	0.252778	0.517797	0.272028	0.235877	0.342764	-0.478755	-0.3815	0.23007	0.351063		96.2906	143.847	125.955	136.549	122.659	87.8152	112.418	115.243
ENSG00000183735	TBK1	PC	TANK binding kinase 1	The NF-kappa-B (NFKB) complex of proteins is inhibited by I-kappa-B (IKB) proteins, which inactivate NFKB by trapping it in the cytoplasm. Phosphorylation of serine residues on the IKB proteins by IKB kinases marks them for destruction via the ubiquitination pathway, thereby allowing activation and nuclear translocation of the NFKB complex. The protein encoded by this gene is similar to IKB kinas…	hsa04014 (Ras signaling pathway), hsa04137 (Mitophagy - animal), hsa04620 (Toll-like receptor signaling pathway), hsa04621 (NOD-like receptor signaling pathway), hsa04622 (RIG-I-like receptor signaling pathway), hsa04623 (Cytosolic DNA-sensing pathway), hsa04657 (IL-17 signaling pathway), hsa05160 (Hepatitis C), hsa05161 (Hepatitis B), hsa05162 (Measles), hsa05163 (Human cytomegalovirus infection…			0.647251	0.0351925		-0.111365	-0.185848	-0.214801		0.0433669	-0.0933297	-0.120467					34.8174	47.5741	15.5448	-0.426146	4.23417	3.50709	0.0862975	0.298976	0.0878662	0.102512	0.23887	-0.201581	-0.537706	0.63215	0.169278		29.6641	18.7166	16.7155	15.7738	15.4206	18.8344	16.9509	16.5978
ENSG00000127666	TICAM1	PC	toll like receptor adaptor molecule 1	This gene encodes an adaptor protein containing a Toll/interleukin-1 receptor (TIR) homology domain, which is an intracellular signaling domain that mediates protein-protein interactions between the Toll-like receptors (TLRs) and signal-transduction components. This protein is involved in native immunity against invading pathogens. It specifically interacts with toll-like receptor 3, but not with…	hsa04064 (NF-kappa B signaling pathway), hsa04217 (Necroptosis), hsa04620 (Toll-like receptor signaling pathway), hsa04621 (NOD-like receptor signaling pathway), hsa05133 (Pertussis), hsa05142 (Chagas disease (American trypanosomiasis)), hsa05160 (Hepatitis C), hsa05161 (Hepatitis B), hsa05164 (Influenza A), hsa05165 (Human papillomavirus infection), hsa05167 (Kaposi sarcoma-associated herpesviru…			-0.369591	-0.354483		0.158631	0.47001	0.0378696		-0.119244	0.104989	0.0718195					34.814	37.3941	77.7944	0.359623	3.69144	1.67743	0.220239	0.484483	0.23299	0.0956344	0.23887	0.415761	0.411042	0.305624	0.311706		9.18175	9.29946	14.1258	18.0103	12.8309	11.3006	13.5372	13.184
ENSG00000197386	HTT	PC	huntingtin	Huntingtin is a disease gene linked to Huntington_s disease, a neurodegenerative disorder characterized by loss of striatal neurons. This is thought to be caused by an expanded, unstable trinucleotide repeat in the huntingtin gene, which translates as a polyglutamine repeat in the protein product. A fairly broad range in the number of trinucleotide repeats has been identified in normal controls, …	hsa05016 (Huntington disease), GO:0000132 (establishment of mitotic spindle orientation), GO:0006890 (retrograde vesicle-mediated transport, Golgi to ER), GO:0006915 (apoptotic process), GO:0007030 (Golgi organization), GO:0031587 (positive regulation of inositol 1,4,5-trisphosphate-sensitive calcium-release channel activity), GO:0031648 (protein destabilization), GO:0042297 (vocal learning), GO:…			-0.664618	-0.380807		0.192688	0.411787	0.34585		-0.0182179	-0.0383967	0.151714					34.0534	54.4195	84.4111	0.475444	4.62503	2.58058	0.134815	0.374574	0.129158	0.0439369	0.23887	0.264575	0.462631	0.526586	0.24839		14.2435	17.7749	27.4275	32.2538	30.7235	23.4252	23.0721	26.6035
ENSG00000023287	RB1CC1	PC	RB1 inducible coiled-coil 1	The protein encoded by this gene interacts with signaling pathways to coordinately regulate cell growth, cell proliferation, apoptosis, autophagy, and cell migration. This tumor suppressor also enhances retinoblastoma 1 gene expression in cancer cells. Alternative splicing results in multiple transcript variants encoding distinct isoforms. [provided by RefSeq, Nov 2009].	hsa04140 (Autophagy - animal), hsa04211 (Longevity regulating pathway), GO:0000045 (autophagic vacuole assembly), GO:0000422 (mitochondrion degradation), GO:0001889 (liver development), GO:0001934 (positive regulation of protein phosphorylation), GO:0006351 (transcription, DNA-templated), GO:0006355 (regulation of transcription, DNA-templated), GO:0006914 (autophagy), GO:0006995 (cellular respons…			-0.338526	0.261944		-0.385839	-0.102863	-0.122766		0.322071	0.199202	0.166777					33.8253	23.2534	69.4839	0.359229	2.92739	1.57257	0.23431	0.498433	0.241231	0.18627	0.300835	0.415761	0.469052	0.305624	0.241008		5.29716	9.06403	5.06173	6.59202	6.47431	9.53489	8.59317	8.35774
ENSG00000074319	TSG101	PC	tumor susceptibility 101	The protein encoded by this gene belongs to a group of apparently inactive homologs of ubiquitin-conjugating enzymes. The gene product contains a coiled-coil domain that interacts with stathmin, a cytosolic phosphoprotein implicated in tumorigenesis. The protein may play a role in cell growth and differentiation and act as a negative growth regulator. In vitro steady-state expression of this tumo…	hsa04144 (Endocytosis), GO:0001558 (regulation of cell growth), GO:0006513 (protein monoubiquitination), GO:0007050 (cell cycle arrest), GO:0008285 (negative regulation of cell proliferation), GO:0008333 (endosome to lysosome transport), GO:0015031 (protein transport), GO:0016197 (endosomal transport), GO:0016236 (macroautophagy), GO:0019058 (viral life cycle), GO:0030216 (keratinocyte differenti…			0.0268014	0.031317		-0.0531627	-0.165457	-0.195743		0.125554	0.105138	0.125554					33.5603	91.9637	13.9744	0.121373	7.51688	1.06283	0.323411	0.586685	0.384971	0.0423134	0.23887	0.570352	0.423293	0.139877	0.296035		185.754	186.342	175.63	162.329	158.915	199.056	196.23	199.056
ENSG00000123395	ATG101	PC	autophagy related 101		hsa04136 (Autophagy - other), hsa04140 (Autophagy - animal), hsa04211 (Longevity regulating pathway), GO:0000045 (autophagic vacuole assembly), GO:0016236 (macroautophagy), GO:0000407 (pre-autophagosomal structure), GO:0005789 (endoplasmic reticulum membrane), GO:0005829 (cytosol), GO:0005515 (protein binding), GO:0032403 (protein complex binding), GO:0042802 (identical protein binding), R-HSA-16…			-0.362046	-0.0685804		0.167667	0.00896068	0.152559		-0.0422676	-0.0164261	0.160133					32.7746	47.0095	19.4001	0.234384	4.20799	1.46356	0.25024	0.514365	0.290474	0.0956344	0.23887	0.415761	0.502574	0.305624	0.204325		13.6549	17.1863	20.6001	18.2458	20.3646	17.5395	17.8926	20.4824
ENSG00000078902	TOLLIP	PC	toll interacting protein	This gene encodes a ubiquitin-binding protein that interacts with several Toll-like receptor (TLR) signaling cascade components. The encoded protein regulates inflammatory signaling and is involved in interleukin-1 receptor trafficking and in the turnover of IL1R-associated kinase. [provided by RefSeq, Aug 2011]. Publication Note: This RefSeq record includes a subset of the publications that are …	hsa04620 (Toll-like receptor signaling pathway), GO:0006511 (ubiquitin-dependent protein catabolic process), GO:0006914 (autophagy), GO:0006954 (inflammatory response), GO:0007165 (signal transduction), GO:0007267 (cell-cell signaling), GO:0016310 (phosphorylation), GO:0030855 (epithelial cell differentiation), GO:0033235 (positive regulation of protein sumoylation), GO:0035556 (intracellular sig…			-0.407744	-0.41992		0.148687	0.404848	0.25207		-0.0641322	-0.142671	0.228862					32.7291	45.3246	51.363	0.381595	4.10319	1.82611	0.202138	0.464135	0.208994	0.0685251	0.23887	0.340168	0.414271	0.40968	0.307538		12.0069	11.8892	18.5989	22.6012	20.1292	15.7738	14.8321	19.7761
ENSG00000136048	DRAM1	PC	DNA damage regulated autophagy modulator 1	This gene is regulated as part of the p53 tumor suppressor pathway. The gene encodes a lysosomal membrane protein that is required for the induction of autophagy by the pathway. Decreased transcriptional expression of this gene is associated with various tumors. This gene has a pseudogene on chromosome 4. [provided by RefSeq, Jul 2008]. Publication Note: This RefSeq record includes a subset of th…	GO:0006914 (autophagy), GO:0006915 (apoptotic process), GO:0010506 (regulation of autophagy), GO:0005737 (cytoplasm), GO:0005764 (lysosome), GO:0005765 (lysosomal membrane), GO:0016021 (integral component of membrane), GO:0005515 (protein binding)			0.19277	-0.208868		-0.358903	-0.130861	-0.0729764		0.130781	0.382049	0.0660073					32.6563	49.8147	26.5726	0.257761	4.36045	1.45144	0.2521	0.516968	0.274464	0.18627	0.300835	0.415761	0.431099	0.305624	0.286254		23.1898	17.0686	15.1852	18.1281	18.9521	22.1304	26.7212	21.0709
ENSG00000112425	EPM2A	PC	EPM2A, laforin glucan phosphatase	This gene encodes a dual-specificity phosphatase that associates with polyribosomes. The encoded protein may be involved in the regulation of glycogen metabolism. Mutations in this gene have been associated with myoclonic epilepsy of Lafora. Alternative splicing results in multiple transcript variants. [provided by RefSeq, Jul 2008].	GO:0016239 (positive regulation of macroautophagy), GO:0032007 (negative regulation of TOR signaling), GO:0005634 (nucleus), GO:0005515 (protein binding), R-HSA-1430728 (Homo sapiens: Metabolism), R-HSA-1643685 (Homo sapiens: Disease), R-HSA-3229121 (Homo sapiens: Glycogen storage diseases), R-HSA-3322077 (Homo sapiens: Glycogen synthesis), R-HSA-3785653 (Homo sapiens: Myoclonic epilepsy of Lafor…			0.265453	0.265453		-0.505237	0.361684	-0.0690297		0.0798637	-0.638544	0.240357					32.6273	7.18066	69.3692	-0.461165	2.02711	1.11183	0.312972	0.57623	0.303213	0.3584	0.468932	-0.519654	-0.390442	0.186848	0.33892		4.8263	4.8263	2.00115	5.29716	3.41373	4.0023	1.64801	4.70859
ENSG00000069329	VPS35	PC	VPS35, retromer complex component	This gene belongs to a group of vacuolar protein sorting (VPS) genes. The encoded protein is a component of a large multimeric complex, termed the retromer complex, involved in retrograde transport of proteins from endosomes to the trans-Golgi network. The close structural similarity between the yeast and human proteins that make up this complex suggests a similarity in function. Expression studi…	hsa04144 (Endocytosis), GO:0007040 (lysosome organization), GO:0010628 (positive regulation of gene expression), GO:0010629 (negative regulation of gene expression), GO:0010821 (regulation of mitochondrion organization), GO:0016055 (Wnt signaling pathway), GO:0016241 (regulation of macroautophagy), GO:0031647 (regulation of protein stability), GO:0031648 (protein destabilization), GO:0032268 (reg…			0.209903	0.568044		-0.359218	-0.216703	-0.271289		-0.0262871	0.0908767	0.00467389					32.4429	73.368	49.528	-0.325188	5.77057	2.33859	0.152779	0.402439	0.155057	0.0439369	0.23887	-0.264575	-0.461895	0.526586	0.249243		61.9179	79.9283	41.0824	45.5556	43.7899	52.2653	56.8562	53.4425
ENSG00000221983	UBA52	PC	ubiquitin A-52 residue ribosomal protein fusion product 1	Ubiquitin is a highly conserved nuclear and cytoplasmic protein that has a major role in targeting cellular proteins for degradation by the 26S proteosome. It is also involved in the maintenance of chromatin structure, the regulation of gene expression, and the stress response. Ubiquitin is synthesized as a precursor protein consisting of either polyubiquitin chains or a single ubiquitin moiety f…	hsa03010 (Ribosome), GO:0000086 (G2/M transition of mitotic cell cycle), GO:0000122 (negative regulation of transcription from RNA polymerase II promoter), GO:0000165 (MAPK cascade), GO:0000184 (nuclear-transcribed mRNA catabolic process, nonsense-mediated decay), GO:0000187 (activation of MAPK activity), GO:0000209 (protein polyubiquitination), GO:0000715 (nucleotide-excision repair, DNA damage …			-0.013144	-0.149998		0.05572	0.0300976	-0.0176532		0.10817	0.0418225	-0.0550157					31.7184	99.2943	13.0481	0.106051	10.4204	1.26583	0.283101	0.546096	0.373595	0.405442	0.495642	0.440959	0.560821	0.274128	0.148143		1355.96	1233.06	1422.35	1397.27	1351.72	1475.08	1408.69	1317.11
ENSG00000123240	OPTN	PC	optineurin	This gene encodes the coiled-coil containing protein optineurin. Optineurin may play a role in normal-tension glaucoma and adult-onset primary open angle glaucoma. Optineurin interacts with adenovirus E3-14.7K protein and may utilize tumor necrosis factor-alpha or Fas-ligand pathways to mediate apoptosis, inflammation or vasoconstriction. Optineurin may also function in cellular morphogenesis and…	hsa04137 (Mitophagy - animal), GO:0000042 (protein targeting to Golgi), GO:0000086 (G2/M transition of mitotic cell cycle), GO:0001920 (negative regulation of receptor recycling), GO:0006914 (autophagy), GO:0007030 (Golgi organization), GO:0007165 (signal transduction), GO:0008219 (cell death), GO:0010508 (positive regulation of autophagy), GO:0043001 (Golgi to plasma membrane protein transport),…			0.0063943	-0.0475753		-0.103643	-0.103643	-0.00612401		0.00327489	0.154344	0.0969716					31.615	72.6359	69.2633	0.126726	5.71669	1.09425	0.316662	0.579822	0.394505	0.0929678	0.23887	0.494305	0.568366	0.213083	0.141578		52.5008	50.4996	48.4985	48.4985	52.0299	52.383	58.3865	56.0322
ENSG00000162341	TPCN2	PC	two pore segment channel 2	This gene encodes a putative cation-selective ion channel with two repeats of a six-transmembrane-domain. The protein localizes to lysosomal membranes and enables nicotinic acid adenine dinucleotide phosphate (NAADP) -induced calcium ion release from lysosome-related stores. This ubiquitously expressed gene has elevated expression in liver and kidney. Two common nonsynonymous SNPs in this gene st…	hsa04972 (Pancreatic secretion), GO:0006874 (cellular calcium ion homeostasis), GO:0006939 (smooth muscle contraction), GO:0007040 (lysosome organization), GO:0010506 (regulation of autophagy), GO:0019722 (calcium-mediated signaling), GO:0033280 (response to vitamin D), GO:0034220 (ion transmembrane transport), GO:0034765 (regulation of ion transmembrane transport), GO:0051209 (release of sequest…			0.314894	0.112043		-0.294036	0.0845568	-0.0613229		-0.0923563	-0.330571	0.266792					31.5132	7.18066	88.9105	-0.336842	2.02711	1.06008	0.324012	0.587214	0.330541	0.249352	0.35404	-0.503953	-0.414479	0.202884	0.30727		5.17945	4.23773	2.70744	4.12001	3.53144	3.41373	2.58972	4.94402
ENSG00000159720	ATP6V0D1	PC	ATPase H+ transporting V0 subunit d1	This gene encodes a component of vacuolar ATPase (V-ATPase), a multisubunit enzyme that mediates acidification of eukaryotic intracellular organelles. V-ATPase dependent organelle acidification is necessary for such intracellular processes as protein sorting, zymogen activation, receptor-mediated endocytosis, and synaptic vesicle proton gradient generation. V-ATPase is composed of a cytosolic V1 …	hsa00190 (Oxidative phosphorylation), hsa01100 (Metabolic pathways), hsa04142 (Lysosome), hsa04145 (Phagosome), hsa04721 (Synaptic vesicle cycle), hsa04966 (Collecting duct acid secretion), hsa05110 (Vibrio cholerae infection), hsa05120 (Epithelial cell signaling in Helicobacter pylori infection), hsa05152 (Tuberculosis), hsa05165 (Human papillomavirus infection), hsa05203 (Viral carcinogenesis),…			-0.304926	-0.107746		0.0664359	0.122252	0.173246		0.0530706	0.0425891	-0.0449212					30.4831	93.3927	37.865	0.186494	7.7728	2.05335	0.178046	0.434985	0.221049	0.0439369	0.23887	0.264575	0.501184	0.526586	0.205785		175.63	201.645	227.778	236.842	245.435	225.659	224.011	210.709
ENSG00000100644	HIF1A	PC	hypoxia inducible factor 1 subunit alpha	This gene encodes the alpha subunit of transcription factor hypoxia-inducible factor-1 (HIF-1), which is a heterodimer composed of an alpha and a beta subunit. HIF-1 functions as a master regulator of cellular and systemic homeostatic response to hypoxia by activating transcription of many genes, including those involved in energy metabolism, angiogenesis, apoptosis, and other genes whose protein…	hsa04066 (HIF-1 signaling pathway), hsa04137 (Mitophagy - animal), hsa04140 (Autophagy - animal), hsa04659 (Th17 cell differentiation), hsa04919 (Thyroid hormone signaling pathway), hsa05167 (Kaposi sarcoma-associated herpesvirus infection), hsa05200 (Pathways in cancer), hsa05205 (Proteoglycans in cancer), hsa05211 (Renal cell carcinoma), hsa05230 (Central carbon metabolism in cancer), hsa05231 …			-0.857405	0.494694		-0.35039	-0.151064	-0.0828873		0.740282	0.441672	-0.234902					30.4653	42.2283	72.2717	0.511704	3.94403	1.62501	0.227129	0.490824	0.217414	0.573753	0.646528	0.327569	0.388894	0.428329	0.341007		6.94517	20.8355	10.712	12.5955	13.3018	25.0732	20.0115	11.7715
ENSG00000038532	CLEC16A	PC	C-type lectin domain containing 16A	This gene encodes a member of the C-type lectin domain containing family. Single nucleotide polymorphisms in introns of this gene have been associated with diabetes mellitus, multiple sclerosis and rheumatoid arthritis. Multiple transcript variants encoding different isoforms have been found for this gene. [provided by RefSeq, Aug 2011].	GO:0006914 (autophagy), GO:0032435 (negative regulation of proteasomal ubiquitin-dependent protein catabolic process), GO:1901098 (positive regulation of autophagic vacuole maturation), GO:1901525 (negative regulation of macromitophagy), GO:0036020 (endolysosome membrane)			-0.0751416	-0.454452		0.0722074	0.268359	0.0999537		0.224918	-0.221991	0.0861473					30.3639	50.9968	73.3392	0.273207	4.43104	1.48299	0.247297	0.511574	0.270292	0.199666	0.31515	0.352767	0.427612	0.391388	0.290603		19.8938	14.8321	22.2481	25.7795	22.7189	24.9555	17.7749	22.4835
ENSG00000115020	PIKFYVE	PC	phosphoinositide kinase, FYVE-type zinc finger containing	Phosphorylated derivatives of phosphatidylinositol (PtdIns) regulate cytoskeletal functions, membrane trafficking, and receptor signaling by recruiting protein complexes to cell- and endosomal-membranes. Humans have multiple PtdIns proteins that differ by the degree and position of phosphorylation of the inositol ring. This gene encodes an enzyme (PIKfyve; also known as phosphatidylinositol-3-pho…	hsa00562 (Inositol phosphate metabolism), hsa01100 (Metabolic pathways), hsa04070 (Phosphatidylinositol signaling system), hsa04145 (Phagosome), hsa04810 (Regulation of actin cytoskeleton), GO:0006661 (phosphatidylinositol biosynthetic process), GO:0032288 (myelin assembly), GO:0034504 (protein localization to nucleus), GO:0035556 (intracellular signal transduction), GO:0036092 (phosphatidylinosi…			0.354068	0.317069		-0.0671299	-0.277385	-0.335112		0.0946465	-0.0671299	-0.0190277					30.2645	15.4023	87.7371	-0.381374	2.48701	1.73864	0.212538	0.475588	0.216521	0.0537348	0.23887	-0.304188	-0.511084	0.463855	0.195514		7.29831	7.06288	4.94402	4.0023	3.76687	5.76802	4.94402	5.17945
ENSG00000171608	PIK3CD	PC	phosphatidylinositol-4,5-bisphosphate 3-kinase catalytic subunit delta	Phosphoinositide 3-kinases (PI3Ks) phosphorylate inositol lipids and are involved in the immune response. The protein encoded by this gene is a class I PI3K found primarily in leukocytes. Like other class I PI3Ks (p110-alpha p110-beta, and p110-gamma), the encoded protein binds p85 adapter proteins and GTP-bound RAS. However, unlike the other class I PI3Ks, this protein phosphorylates itself, not…	hsa00562 (Inositol phosphate metabolism), hsa01100 (Metabolic pathways), hsa01521 (EGFR tyrosine kinase inhibitor resistance), hsa01522 (Endocrine resistance), hsa01524 (Platinum drug resistance), hsa04012 (ErbB signaling pathway), hsa04014 (Ras signaling pathway), hsa04015 (Rap1 signaling pathway), hsa04024 (cAMP signaling pathway), hsa04062 (Chemokine signaling pathway), hsa04066 (HIF-1 signali…			-0.149454	-0.279229		0.224294	-0.0303955	0.194046		-0.111182	0.105815	0.0461062					29.9883	52.3818	90.7808	0.206662	4.50302	1.18763	0.297744	0.561823	0.341309	0.0956344	0.23887	0.415761	0.428533	0.305624	0.289451		19.8938	18.0103	26.3681	21.7772	25.7795	20.4824	24.1315	23.0721
ENSG00000169047	IRS1	PC	insulin receptor substrate 1	This gene encodes a protein which is phosphorylated by insulin receptor tyrosine kinase. Mutations in this gene are associated with type II diabetes and susceptibility to insulin resistance. [provided by RefSeq, Nov 2009]. Sequence Note: This RefSeq record was created from transcript and genomic sequence data because no single transcript was available for the full length of the gene. The extent o…	hsa04022 (cGMP-PKG signaling pathway), hsa04068 (FoxO signaling pathway), hsa04140 (Autophagy - animal), hsa04150 (mTOR signaling pathway), hsa04151 (PI3K-Akt signaling pathway), hsa04152 (AMPK signaling pathway), hsa04211 (Longevity regulating pathway), hsa04213 (Longevity regulating pathway - multiple species), hsa04722 (Neurotrophin signaling pathway), hsa04910 (Insulin signaling pathway), hsa…			-0.407025	0.23699		-0.549089	0.116671	0.0193525		0.0525268	0.293584	0.23699					29.9539	2.45236	98.3238	0.453347	1.73354	1.19765	0.29581	0.560004	0.281398	0.277307	0.383453	0.411921	0.417994	0.310569	0.302765		1.76572	3.88458	1.41258	3.41373	3.06058	3.1783	4.12001	3.88458
ENSG00000164885	CDK5	PC	cyclin dependent kinase 5		hsa04360 (Axon guidance), hsa05010 (Alzheimer disease), hsa05030 (Cocaine addiction), GO:0001764 (neuron migration), GO:0001963 (synaptic transmission, dopaminergic), GO:0006886 (intracellular protein transport), GO:0006913 (nucleocytoplasmic transport), GO:0007049 (cell cycle), GO:0007160 (cell-matrix adhesion), GO:0007268 (synaptic transmission), GO:0007416 (synapse assembly), GO:0007519 (skele…			-0.0440955	0.0686484		0.123462	0.0979268	0.0979268		-0.291585	-0.091047	0.0387634					29.4058	70.6334	20.7764	-0.152349	5.57603	1.08398	0.318845	0.581763	0.375986	0.0601301	0.23887	-0.430932	-0.446656	0.28646	0.267239		45.791	49.6756	51.6768	50.735	50.735	38.2573	44.2607	48.6162
ENSG00000185189	NRBP2	PC	nuclear receptor binding protein 2		GO:0006468 (protein phosphorylation), GO:0006888 (ER to Golgi vesicle-mediated transport), GO:0016242 (negative regulation of macroautophagy), GO:0030182 (neuron differentiation), GO:0035556 (intracellular signal transduction), GO:0043524 (negative regulation of neuron apoptotic process), GO:0005737 (cytoplasm), GO:0005829 (cytosol), GO:0012505 (endomembrane system), GO:0004674 (protein serine/th…			-0.39732	-0.0477196		0.0969658	0.17207	0.113392		0.0293245	-0.174917	0.208205					28.4214	57.1454	80.4852	0.21905	4.77135	1.27129	0.282116	0.545465	0.316757	0.199666	0.31515	0.352767	0.420744	0.391388	0.299264		19.8938	25.8972	28.8401	30.4881	29.1932	27.4275	23.5429	31.3121
ENSG00000116260	QSOX1	PC	quiescin sulfhydryl oxidase 1	This gene encodes a protein that contains domains of thioredoxin and ERV1, members of two long-standing gene families. The gene expression is induced as fibroblasts begin to exit the proliferative cycle and enter quiescence, suggesting that this gene plays an important role in growth regulation. Two transcript variants encoding two different isoforms have been found for this gene. [provided by Re…	GO:0002576 (platelet degranulation), GO:0016242 (negative regulation of macroautophagy), GO:0043312 (neutrophil degranulation), GO:0045454 (cell redox homeostasis), GO:0055114 (oxidation-reduction process), GO:0005576 (extracellular region), GO:0005615 (extracellular space), GO:0005794 (Golgi apparatus), GO:0030173 (integral component of Golgi membrane), GO:0031093 (platelet alpha granule lumen),…			-0.429278	-0.149481		0.160005	0.209143	0.221593		-0.047955	0.0574555	-0.0214828					28.1991	98.4651	93.4363	0.220753	9.60936	1.73509	0.212975	0.476378	0.235207	0.0439369	0.23887	0.264575	0.405341	0.526586	0.31913		573.859	697.106	864.379	894.396	902.165	748.077	804.933	761.967
ENSG00000105647	PIK3R2	PC	phosphoinositide-3-kinase regulatory subunit 2	Phosphatidylinositol 3-kinase (PI3K) is a lipid kinase that phosphorylates phosphatidylinositol and similar compounds, creating second messengers important in growth signaling pathways. PI3K functions as a heterodimer of a regulatory and a catalytic subunit. The protein encoded by this gene is a regulatory component of PI3K. Two transcript variants, one protein coding and the other non-protein co…	hsa01521 (EGFR tyrosine kinase inhibitor resistance), hsa01522 (Endocrine resistance), hsa01524 (Platinum drug resistance), hsa04012 (ErbB signaling pathway), hsa04014 (Ras signaling pathway), hsa04015 (Rap1 signaling pathway), hsa04024 (cAMP signaling pathway), hsa04062 (Chemokine signaling pathway), hsa04066 (HIF-1 signaling pathway), hsa04068 (FoxO signaling pathway), hsa04070 (Phosphatidylino…			0.0322329	0.00827246		-0.0125866	0.0920781	0.0985769		0.00827246	-0.0196072	-0.207239					28.0039	70.4217	59.0737	-0.1077	5.56217	0.69594	0.420857	0.674095	0.4935	0.187083	0.30146	-0.55134	-0.464379	0.156626	0.246369		48.0276	47.2036	46.4973	50.1465	50.3819	47.2036	46.2619	40.3761
ENSG00000100330	MTMR3	PC	myotubularin related protein 3	This gene encodes a member of the myotubularin dual specificity protein phosphatase gene family. The encoded protein is structurally similar to myotubularin but in addition contains a FYVE domain and an N-terminal PH-GRAM domain. The protein can self-associate and also form heteromers with another myotubularin related protein. The protein binds to phosphoinositide lipids through the PH-GRAM domai…	hsa00562 (Inositol phosphate metabolism), hsa01100 (Metabolic pathways), hsa04070 (Phosphatidylinositol signaling system), hsa04140 (Autophagy - animal), GO:0006470 (protein dephosphorylation), GO:0006661 (phosphatidylinositol biosynthetic process), GO:0016236 (macroautophagy), GO:0035335 (peptidyl-tyrosine dephosphorylation), GO:0042149 (cellular response to glucose starvation), GO:0046856 (phos…			-0.160808	-0.190559		-0.160808	0.0446797	0.404437		-0.0750703	-0.0750703	0.213199					27.3117	33.8126	87.3225	0.202549	3.49268	0.665659	0.430866	0.681783	0.460367	0.178155	0.291845	0.54194	0.301945	0.165291	0.467322		9.53489	9.29946	9.53489	11.3006	15.0675	10.2412	10.2412	12.9486
ENSG00000141510	TP53	PC	tumor protein p53	This gene encodes a tumor suppressor protein containing transcriptional activation, DNA binding, and oligomerization domains. The encoded protein responds to diverse cellular stresses to regulate expression of target genes, thereby inducing cell cycle arrest, apoptosis, senescence, DNA repair, or changes in metabolism. Mutations in this gene are associated with a variety of human cancers, includi…	hsa01522 (Endocrine resistance), hsa01524 (Platinum drug resistance), hsa04010 (MAPK signaling pathway), hsa04071 (Sphingolipid signaling pathway), hsa04110 (Cell cycle), hsa04115 (p53 signaling pathway), hsa04137 (Mitophagy - animal), hsa04151 (PI3K-Akt signaling pathway), hsa04210 (Apoptosis), hsa04211 (Longevity regulating pathway), hsa04216 (Ferroptosis), hsa04218 (Cellular senescence), hsa04…			0.04856	0.0237461		-0.00697026	0.0397468	0.00937279		-0.0935214	-0.0571405	0.0362064					27.0636	83.3186	65.858	-0.0772033	6.51931	0.574499	0.46347	0.708007	0.552688	0.290512	0.393599	-0.592144	-0.63088	0.121962	0.0934932		94.6426	92.9946	90.9935	94.054	92.0529	85.5786	87.8152	93.8186
ENSG00000002330	BAD	PC	BCL2 associated agonist of cell death	The protein encoded by this gene is a member of the BCL-2 family. BCL-2 family members are known to be regulators of programmed cell death. This protein positively regulates cell apoptosis by forming heterodimers with BCL-xL and BCL-2, and reversing their death repressor activity. Proapoptotic activity of this protein is regulated through its phosphorylation. Protein kinases AKT and MAP kinase, a…	hsa01521 (EGFR tyrosine kinase inhibitor resistance), hsa01522 (Endocrine resistance), hsa01524 (Platinum drug resistance), hsa04012 (ErbB signaling pathway), hsa04014 (Ras signaling pathway), hsa04022 (cGMP-PKG signaling pathway), hsa04024 (cAMP signaling pathway), hsa04062 (Chemokine signaling pathway), hsa04140 (Autophagy - animal), hsa04151 (PI3K-Akt signaling pathway), hsa04210 (Apoptosis), …			-0.571733	-0.0528674		0.123449	0.189914	0.223937		-0.0582578	0.131589	0.0139676					26.9063	93.7985	7.28716	0.269182	7.84743	2.10235	0.173345	0.429099	0.183729	0.102512	0.23887	0.201581	0.45218	0.63215	0.260643		152.205	218.949	247.672	259.443	265.682	218.125	249.084	229.426
ENSG00000181404	WASHC1	PC	WASH complex subunit 1		hsa04144 (Endocytosis), GO:0001556 (oocyte maturation), GO:0002468 (dendritic cell antigen processing and presentation), GO:0006887 (exocytosis), GO:0007032 (endosome organization), GO:0010507 (negative regulation of autophagy), GO:0015031 (protein transport), GO:0016197 (endosomal transport), GO:0022617 (extracellular matrix disassembly), GO:0030335 (positive regulation of cell migration), GO:00…			-0.246777	-0.429441		0.128749	0.361419	0.199141		-0.0033599	0.0610596	-0.0707909					26.0935	54.1725	67.6577	0.2797	4.60946	1.45694	0.251254	0.51598	0.272088	0.0439369	0.23887	0.264575	0.394313	0.526586	0.333725		19.7761	17.1863	26.2504	31.1944	27.663	23.7784	24.9555	22.6012
ENSG00000090989	EXOC1	PC	exocyst complex component 1	The protein encoded by this gene is a component of the exocyst complex, a multiple protein complex essential for targeting exocytic vesicles to specific docking sites on the plasma membrane. Though best characterized in yeast, the component proteins and functions of the exocyst complex have been demonstrated to be highly conserved in higher eukaryotes. At least eight components of the exocyst com…	GO:0006887 (exocytosis), GO:0006893 (Golgi to plasma membrane transport), GO:0015031 (protein transport), GO:0016241 (regulation of macroautophagy), GO:0048015 (phosphatidylinositol-mediated signaling), GO:0050714 (positive regulation of protein secretion), GO:0051601 (exocyst localization), GO:0000145 (exocyst), GO:0005737 (cytoplasm), GO:0005829 (cytosol), GO:0005886 (plasma membrane), GO:00160…			0.248559	0.629879		-0.436841	-0.26258	-0.398365		0.141639	-0.0242193	0.101928					25.9453	52.1348	73.2686	-0.328181	4.49079	1.43796	0.254191	0.518444	0.258543	0.0439369	0.23887	-0.264575	-0.387239	0.526586	0.343246		26.0149	34.4904	15.4206	17.6572	15.8915	24.0138	21.1886	23.3075
ENSG00000118705	RPN2	PC	ribophorin II	This gene encodes a type I integral membrane protein found only in the rough endoplasmic reticulum. The encoded protein is part of an N-oligosaccharyl transferase complex that links high mannose oligosaccharides to asparagine residues found in the Asn-X-Ser/Thr consensus motif of nascent polypeptide chains. This protein is similar in sequence to the yeast oligosaccharyl transferase subunit SWP1. …	hsa00510 (N-Glycan biosynthesis), hsa01100 (Metabolic pathways), hsa04141 (Protein processing in endoplasmic reticulum), GO:0006464 (cellular protein modification process), GO:0006487 (protein N-linked glycosylation), GO:0007568 (aging), GO:0018279 (protein N-linked glycosylation via asparagine), GO:0042493 (response to drug), GO:0000421 (autophagic vacuole membrane), GO:0005789 (endoplasmic reti…			0.234434	0.1408		-0.0940716	-0.173822	-0.146746		0.00394219	0.0628928	-0.0274298					25.7697	98.3504	31.0719	-0.141329	9.48423	1.41558	0.257714	0.522528	0.3102	0.0439369	0.23887	-0.264575	-0.435898	0.526586	0.28032		839.07	786.216	667.795	631.775	643.782	714.881	744.781	699.461
ENSG00000108239	TBC1D12	PC	TBC1 domain family member 12		GO:0006886 (intracellular protein transport), GO:0031338 (regulation of vesicle fusion), GO:0090630 (NA), GO:2000785 (regulation of autophagic vacuole assembly), GO:0005776 (autophagic vacuole), GO:0055037 (recycling endosome), GO:0005096 (GTPase activator activity), GO:0017137 (Rab GTPase binding)			0.293096	0.346874		-0.203403	-0.396084	-0.152769		0.139042	0.256097	-0.282852					25.0636	17.0254	86.6696	-0.279069	2.57514	0.754471	0.40253	0.659514	0.411106	0.0956344	0.23887	-0.415761	-0.336172	0.305624	0.415557		7.29831	7.65146	4.59087	3.76687	4.8263	6.35659	7.06288	4.23773
ENSG00000269335	IKBKG	PC	inhibitor of nuclear factor kappa B kinase subunit gamma	This gene encodes the regulatory subunit of the inhibitor of kappaB kinase (IKK) complex, which activates NF-kappaB resulting in activation of genes involved in inflammation, immunity, cell survival, and other pathways. Mutations in this gene result in incontinentia pigmenti, hypohidrotic ectodermal dysplasia, and several other types of immunodeficiencies. Multiple transcript variants encoding di…	hsa01523 (Antifolate resistance), hsa04010 (MAPK signaling pathway), hsa04014 (Ras signaling pathway), hsa04062 (Chemokine signaling pathway), hsa04064 (NF-kappa B signaling pathway), hsa04151 (PI3K-Akt signaling pathway), hsa04210 (Apoptosis), hsa04380 (Osteoclast differentiation), hsa04620 (Toll-like receptor signaling pathway), hsa04621 (NOD-like receptor signaling pathway), hsa04622 (RIG-I-li…			-0.782593	-0.411857		0.591727	0.394512	0.306539		-0.182365	-0.128813	0.21285					25.0619	60.7092	43.0613	0.434143	4.97271	1.3266	0.272402	0.536699	0.261042	0.0439369	0.23887	0.264575	0.317609	0.526586	0.44332		16.4801	21.8949	45.9087	39.7876	37.3156	26.0149	27.0744	34.8436
ENSG00000117461	PIK3R3	PC	phosphoinositide-3-kinase regulatory subunit 3		hsa01521 (EGFR tyrosine kinase inhibitor resistance), hsa01522 (Endocrine resistance), hsa01524 (Platinum drug resistance), hsa04012 (ErbB signaling pathway), hsa04014 (Ras signaling pathway), hsa04015 (Rap1 signaling pathway), hsa04024 (cAMP signaling pathway), hsa04062 (Chemokine signaling pathway), hsa04066 (HIF-1 signaling pathway), hsa04068 (FoxO signaling pathway), hsa04070 (Phosphatidylino…			0.125817	-0.362525		-0.157385	0.0221842	0.140032		0.195533	0.125817	-0.0894732					25.0068	28.3169	91.7247	0.217435	3.20338	0.825296	0.381967	0.64205	0.409952	0.592387	0.665672	0.386572	0.406593	0.344151	0.317492		9.88803	6.47431	7.76917	9.06403	10.0057	10.4766	9.88803	8.24003
ENSG00000131475	VPS25	PC	vacuolar protein sorting 25 homolog	This gene encodes a protein that is a subunit of the endosomal sorting complex required for transport II (ESCRT-II). This protein complex functions in sorting of ubiquitinated membrane proteins during endocytosis. A pseudogene of this gene is present on chromosome 1. [provided by RefSeq, Jul 2013]. Publication Note: This RefSeq record includes a subset of the publications that are available for t…	hsa04144 (Endocytosis), GO:0006351 (transcription, DNA-templated), GO:0006355 (regulation of transcription, DNA-templated), GO:0016197 (endosomal transport), GO:0016236 (macroautophagy), GO:0036258 (multivesicular body assembly), GO:0043328 (protein targeting to vacuole involved in ubiquitin-dependent protein catabolic process via the multivesicular body sorting pathway), GO:0000814 (ESCRT II com…			-0.0776043	0.0101347		-0.0590084	0.00130172	0.00572495		-0.00165465	0.0733081	0.0477979					24.7833	86.4767	11.6277	0.0777237	6.8227	0.627089	0.444184	0.69296	0.536811	0.405442	0.495642	0.466156	0.644948	0.244323	0.0842157		106.885	113.712	108.298	113.006	113.359	112.771	118.892	116.773
ENSG00000168092	PAFAH1B2	PC	platelet activating factor acetylhydrolase 1b catalytic subunit 2	Platelet-activating factor acetylhydrolase (PAFAH) inactivates platelet-activating factor (PAF) into acetate and LYSO-PAF. This gene encodes the beta subunit of PAFAH, the other subunits are alpha and gamma. Multiple alternatively spliced transcript variants have been described for this gene. [provided by RefSeq, Jan 2014].	hsa00565 (Ether lipid metabolism), hsa01100 (Metabolic pathways), GO:0006629 (lipid metabolic process), GO:0007283 (spermatogenesis), GO:0007420 (brain development), GO:0016042 (lipid catabolic process), GO:0016239 (positive regulation of macroautophagy), GO:0043312 (neutrophil degranulation), GO:0001650 (fibrillar center), GO:0005576 (extracellular region), GO:0005730 (nucleolus), GO:0005737 (cy…			0.185075	-0.00801218		-0.00102559	-0.0185559	-0.0908884		0.178936	-0.120868	-0.12466					24.2181	70.3687	53.5509	-0.0997472	5.55947	0.509065	0.489531	0.72798	0.54611	0.362805	0.46944	-0.516551	-0.324893	0.189961	0.432336		53.4425	46.4973	46.7327	46.1442	43.7899	53.207	42.8481	42.7304
ENSG00000135341	MAP3K7	PC	mitogen-activated protein kinase kinase kinase 7	The protein encoded by this gene is a member of the serine/threonine protein kinase family. This kinase mediates the signaling transduction induced by TGF beta and morphogenetic protein (BMP), and controls a variety of cell functions including transcription regulation and apoptosis. In response to IL-1, this protein forms a kinase complex including TRAF6, MAP3K7P1/TAB1 and MAP3K7P2/TAB2; this com…	hsa04010 (MAPK signaling pathway), hsa04064 (NF-kappa B signaling pathway), hsa04140 (Autophagy - animal), hsa04152 (AMPK signaling pathway), hsa04310 (Wnt signaling pathway), hsa04380 (Osteoclast differentiation), hsa04520 (Adherens junction), hsa04620 (Toll-like receptor signaling pathway), hsa04621 (NOD-like receptor signaling pathway), hsa04622 (RIG-I-like receptor signaling pathway), hsa0465…			0.320424	0.556879		-0.211232	-0.426522	-0.460079		0.0253957	0.270148	-0.0750147					24.0836	36.1591	96.1535	-0.333729	3.63104	1.20695	0.294029	0.557936	0.299362	0.0439369	0.23887	-0.264575	-0.375556	0.526586	0.359243		15.1852	18.2458	9.88803	8.24003	8.0046	12.0069	14.5966	11.0652
ENSG00000184304	PRKD1	PC	protein kinase D1	PRKD1 is a serine/threonine kinase that regulates a variety of cellular functions, including membrane receptor signaling, transport at the Golgi, protection from oxidative stress at the mitochondria, gene transcription, and regulation of cell shape, motility, and adhesion (summary by Eiseler et al., 2009 [PubMed 19329994]).[supplied by OMIM, Nov 2010]. Publication Note: This RefSeq record include…	hsa04015 (Rap1 signaling pathway), hsa04925 (Aldosterone synthesis and secretion), GO:0001525 (angiogenesis), GO:0001938 (positive regulation of endothelial cell proliferation), GO:0006468 (protein phosphorylation), GO:0006915 (apoptotic process), GO:0006954 (inflammatory response), GO:0007030 (Golgi organization), GO:0007165 (signal transduction), GO:0007229 (integrin-mediated signaling pathway)…			0.333158	0.214093		-0.0396925	-0.259035	-0.216594		-0.175365	0.318801	-0.175365					23.4338	23.9502	56.1712	-0.282094	2.96321	1.05928	0.324186	0.587243	0.340181	0.147837	0.252534	-0.278839	-0.395	0.503645	0.332807		9.88803	8.94632	7.1806	5.88573	6.12116	6.35659	9.77032	6.35659
ENSG00000198742	SMURF1	PC	SMAD specific E3 ubiquitin protein ligase 1	This gene encodes a ubiquitin ligase that is specific for receptor-regulated SMAD proteins in the bone morphogenetic protein (BMP) pathway. This protein plays a key roll in the regulation of cell motility, cell signalling, and cell polarity. Alternative splicing results in multiple transcript variants encoding different isoforms.[provided by RefSeq, Dec 2010].	hsa04120 (Ubiquitin mediated proteolysis), hsa04144 (Endocytosis), hsa04340 (Hedgehog signaling pathway), hsa04350 (TGF-beta signaling pathway), GO:0000209 (protein polyubiquitination), GO:0006611 (protein export from nucleus), GO:0007179 (transforming growth factor beta receptor signaling pathway), GO:0007398 (ectoderm development), GO:0016567 (protein ubiquitination), GO:0030154 (cell different…			-0.0143683	-0.166377		0.128176	-0.0942247	-0.0767366		-0.203854	0.355594	0.0717915					22.704	58.892	92.4658	0.195478	4.87626	1.18126	0.298983	0.562909	0.338864	0.789693	0.833671	0.239377	0.397665	0.568018	0.329256		28.6047	25.5441	31.783	26.9567	27.3098	24.8378	37.551	30.4881
ENSG00000150867	PIP4K2A	PC	phosphatidylinositol-5-phosphate 4-kinase type 2 alpha	Phosphatidylinositol-5,4-bisphosphate, the precursor to second messengers of the phosphoinositide signal transduction pathways, is thought to be involved in the regulation of secretion, cell proliferation, differentiation, and motility. The protein encoded by this gene is one of a family of enzymes capable of catalyzing the phosphorylation of phosphatidylinositol-5-phosphate on the fourth hydroxy…	hsa00562 (Inositol phosphate metabolism), hsa01100 (Metabolic pathways), hsa04070 (Phosphatidylinositol signaling system), hsa04810 (Regulation of actin cytoskeleton), GO:0006644 (phospholipid metabolic process), GO:0006661 (phosphatidylinositol biosynthetic process), GO:0010506 (regulation of autophagy), GO:0014066 (regulation of phosphatidylinositol 3-kinase signaling), GO:0035855 (megakaryocyt…			0.281899	0.18811		-0.24866	-0.19151	-0.0966426		0.0527476	0.1107	-0.0966426					22.5097	35.6475	33.2775	-0.19693	3.60685	0.857242	0.373215	0.633348	0.405125	0.0537348	0.23887	-0.304188	-0.402126	0.463855	0.323353		14.8321	13.7726	9.65261	10.1235	10.9475	12.36	12.9486	10.9475
ENSG00000134001	EIF2S1	PC	eukaryotic translation initiation factor 2 subunit alpha	The translation initiation factor EIF2 catalyzes the first regulated step of protein synthesis initiation, promoting the binding of the initiator tRNA to 40S ribosomal subunits. Binding occurs as a ternary complex of methionyl-tRNA, EIF2, and GTP. EIF2 is composed of 3 nonidentical subunits, the 36-kD EIF2-alpha subunit (EIF2S1), the 38-kD EIF2-beta subunit (EIF2S2; MIM 603908), and the 52-kD EIF…	hsa03013 (RNA transport), hsa04140 (Autophagy - animal), hsa04141 (Protein processing in endoplasmic reticulum), hsa04210 (Apoptosis), hsa04932 (Non-alcoholic fatty liver disease (NAFLD)), hsa05160 (Hepatitis C), hsa05162 (Measles), hsa05164 (Influenza A), hsa05168 (Herpes simplex infection), GO:0006413 (translational initiation), GO:0007568 (aging), GO:0032057 (negative regulation of translation…			0.39405	0.328115		-0.279087	-0.35205	-0.347898		0.160455	0.119063	-0.0226489					21.7118	72.1066	59.6912	-0.212638	5.68238	0.934449	0.353266	0.61515	0.36665	0.0439369	0.23887	-0.264575	-0.327551	0.526586	0.428356		66.5088	63.4482	40.9647	38.8458	38.9636	56.2676	54.6196	49.3225
ENSG00000147416	ATP6V1B2	PC	ATPase H+ transporting V1 subunit B2	This gene encodes a component of vacuolar ATPase (V-ATPase), a multisubunit enzyme that mediates acidification of eukaryotic intracellular organelles. V-ATPase dependent organelle acidification is necessary for such intracellular processes as protein sorting, zymogen activation, receptor-mediated endocytosis, and synaptic vesicle proton gradient generation. V-ATPase is composed of a cytosolic V1 …	hsa00190 (Oxidative phosphorylation), hsa01100 (Metabolic pathways), hsa04145 (Phagosome), hsa04150 (mTOR signaling pathway), hsa04721 (Synaptic vesicle cycle), hsa04966 (Collecting duct acid secretion), hsa05110 (Vibrio cholerae infection), hsa05120 (Epithelial cell signaling in Helicobacter pylori infection), hsa05165 (Human papillomavirus infection), hsa05323 (Rheumatoid arthritis), GO:0008286…			0.370865	0.0748922		-0.177499	-0.2133	-0.172792		0.0327221	0.0729118	0.0121995					21.3704	81.1574	75.2978	-0.150603	6.32832	0.897447	0.362623	0.62335	0.398172	0.0439369	0.23887	-0.264575	-0.332232	0.526586	0.421386		103.354	83.8129	70.0402	68.2745	70.2757	81.3409	83.6951	80.1637
ENSG00000118046	STK11	PC	serine/threonine kinase 11	This gene, which encodes a member of the serine/threonine kinase family, regulates cell polarity and functions as a tumor suppressor. Mutations in this gene have been associated with Peutz-Jeghers syndrome, an autosomal dominant disorder characterized by the growth of polyps in the gastrointestinal tract, pigmented macules on the skin and mouth, and other neoplasms. Alternate transcriptional spli…	hsa04068 (FoxO signaling pathway), hsa04140 (Autophagy - animal), hsa04150 (mTOR signaling pathway), hsa04151 (PI3K-Akt signaling pathway), hsa04152 (AMPK signaling pathway), hsa04211 (Longevity regulating pathway), hsa04530 (Tight junction), hsa04920 (Adipocytokine signaling pathway), GO:0001558 (regulation of cell growth), GO:0001894 (tissue homeostasis), GO:0001944 (vasculature development), G…			-0.409844	-0.338581		0.257952	0.32533	0.319833		0.0278653	0.00749652	-0.190051					20.9145	53.1493	65.7609	0.248106	4.54727	0.848976	0.37545	0.635401	0.391292	0.0439369	0.23887	0.264575	0.290045	0.526586	0.485896		16.5978	17.5395	27.5452	28.9578	28.8401	23.1898	22.8367	19.6584
ENSG00000131374	TBC1D5	PC	TBC1 domain family member 5		GO:0002092 (positive regulation of receptor internalization), GO:0006886 (intracellular protein transport), GO:0006914 (autophagy), GO:0016236 (macroautophagy), GO:0031338 (regulation of vesicle fusion), GO:0042147 (retrograde transport, endosome to Golgi), GO:0042594 (response to starvation), GO:0090630 (NA), GO:0005776 (autophagic vacuole), GO:0005794 (Golgi apparatus), GO:0005829 (cytosol), GO…			-0.147225	0.0320083		-0.0370366	-0.0947549	0.0653299		-0.26653	0.318459	0.129749					20.6236	52.8405	30.1632	0.152938	4.52623	0.648569	0.436685	0.686981	0.477329	0.706648	0.767958	0.31497	0.321104	0.447327	0.438035		20.2469	23.1898	22.0126	21.0709	23.7784	18.4812	28.7224	24.9555
ENSG00000149823	VPS51	PC	VPS51, GARP complex subunit	This gene encodes a member of the vacuolar protein sorting-associated protein 51 family. The encoded protein is a component of the Golgi-associated retrograde protein complex which acts as a tethering factor for carriers in retrograde transport from the early and late endosomes to the trans-Golgi network. Alternative splicing results in multiple transcript variants. [provided by RefSeq, Dec 2012].	GO:0006869 (lipid transport), GO:0006914 (autophagy), GO:0007030 (Golgi organization), GO:0007041 (lysosomal transport), GO:0015031 (protein transport), GO:0032456 (endocytic recycling), GO:0042147 (retrograde transport, endosome to Golgi), GO:0048193 (Golgi vesicle transport), GO:0000938 (GARP complex), GO:0005730 (nucleolus), GO:0005794 (Golgi apparatus), GO:0005802 (trans-Golgi network), GO:00…			-0.381052	0.167644		0.22824	0.369451	0.250323		-0.392412	-0.0266652	-0.215528					19.9411	65.464	22.0909	-0.207877	5.24987	0.662943	0.431782	0.682376	0.445509	0.0765781	0.23887	-0.289773	-0.255087	0.486325	0.542054		28.0161	41.9064	43.7899	48.4985	44.4962	27.7807	36.3738	31.6653
ENSG00000130204	TOMM40	PC	translocase of outer mitochondrial membrane 40	TOMM40 is the channel-forming subunit of the translocase of the mitochondrial outer membrane (TOM) complex that is essential for protein import into mitochondria (Humphries et al., 2005 [PubMed 15644312]).[supplied by OMIM, May 2008].	hsa05014 (Amyotrophic lateral sclerosis (ALS)), GO:0006626 (protein targeting to mitochondrion), GO:0006811 (ion transport), GO:0016236 (macroautophagy), GO:0030150 (protein import into mitochondrial matrix), GO:0005739 (mitochondrion), GO:0005741 (mitochondrial outer membrane), GO:0005742 (mitochondrial outer membrane translocase complex), GO:0005743 (mitochondrial inner membrane), GO:0005829 (c…			-0.268093	0.168234		0.121214	0.18865	0.149697		-0.17549	-0.103393	-0.0808187					19.7371	96.295	51.3719	-0.124728	8.46507	0.684774	0.424504	0.676992	0.464044	0.235877	0.342764	-0.277174	-0.279626	0.506303	0.50239		290.991	394.462	381.749	400.112	389.4	310.414	326.423	331.602
ENSG00000114388	NPRL2	PC	NPR2 like, GATOR1 complex subunit		hsa04150 (mTOR signaling pathway), GO:0006468 (protein phosphorylation), GO:0006995 (cellular response to nitrogen starvation), GO:0010508 (positive regulation of autophagy), GO:0032007 (negative regulation of TOR signaling), GO:0033673 (negative regulation of kinase activity), GO:0034198 (cellular response to amino acid starvation), GO:0043547 (positive regulation of GTPase activity), GO:2000785…			-0.0254469	-0.0132717		0.0519151	0.16338	0.158006		-0.180176	-0.00119836	-0.153208					19.7071	56.4397	54.6625	-0.129785	4.73354	0.641926	0.438982	0.68834	0.495837	0.0765781	0.23887	-0.289773	-0.383686	0.486325	0.348076		25.7795	26.0149	27.3098	29.6641	29.5464	22.9544	26.2504	23.4252
ENSG00000130479	MAP1S	PC	microtubule associated protein 1S		GO:0001578 (microtubule bundle formation), GO:0006914 (autophagy), GO:0006915 (apoptotic process), GO:0007399 (nervous system development), GO:0007420 (brain development), GO:0010848 (regulation of chromatin disassembly), GO:0047497 (mitochondrion transport along microtubule), GO:0048812 (neuron projection morphogenesis), GO:0005634 (nucleus), GO:0005730 (nucleolus), GO:0005819 (spindle), GO:0005…			-0.750593	-0.0272093		0.117745	0.40533	0.249455		-0.228265	0.169835	0.0637027					19.6945	58.1598	18.0944	0.295711	4.83148	1.02922	0.330862	0.594511	0.335911	0.102512	0.23887	0.201581	0.325427	0.63215	0.431535		15.5383	26.9567	30.0172	37.0801	33.0778	23.1898	31.1944	28.8401
ENSG00000171100	MTM1	PC	myotubularin 1	This gene encodes a dual-specificity phosphatase that acts on both phosphotyrosine and phosphoserine. It is required for muscle cell differentiation and mutations in this gene have been identified as being responsible for X-linked myotubular myopathy. [provided by RefSeq, Jul 2008]. Publication Note: This RefSeq record includes a subset of the publications that are available for this gene. Please…	hsa00562 (Inositol phosphate metabolism), hsa01100 (Metabolic pathways), hsa04070 (Phosphatidylinositol signaling system), GO:0006470 (protein dephosphorylation), GO:0006661 (phosphatidylinositol biosynthetic process), GO:0008333 (endosome to lysosome transport), GO:0015031 (protein transport), GO:0032007 (negative regulation of TOR signaling), GO:0032435 (negative regulation of proteasomal ubiqu…			0.138209	-0.286383		0.109635	0.166229	-0.405059		0.138209	0.247164	-0.108003					19.6258	5.19584	61.5792	0.258576	1.90772	0.545254	0.474815	0.717667	0.481575	0.662891	0.736358	0.323199	0.308673	0.43488	0.45695		4.0023	2.47201	3.88458	4.12001	2.11886	4.0023	4.47316	3.06058
ENSG00000264364	DYNLL2	PC	dynein light chain LC8-type 2		hsa04962 (Vasopressin-regulated water reabsorption), GO:0006888 (ER to Golgi vesicle-mediated transport), GO:0008039 (synaptic target recognition), GO:0016236 (macroautophagy), GO:0019886 (antigen processing and presentation of exogenous peptide antigen via MHC class II), GO:0035735 (intraciliary transport involved in cilium morphogenesis), GO:1900740 (positive regulation of protein insertion int…			0.32912	0.301634		-0.269654	0.124721	-0.398975		-0.398975	0.623616	-0.311486					19.5737	2.68172	99.6118	-0.355702	1.75257	0.526504	0.482342	0.722144	0.477574	0.384495	0.486699	-0.329537	-0.245428	0.425394	0.557967		4.23773	4.12001	2.11886	3.41373	1.76572	1.76572	5.65031	2.00115
ENSG00000152223	EPG5	PC	ectopic P-granules autophagy protein 5 homolog		GO:0032456 (endocytic recycling), GO:0097352 (autophagic vacuole maturation), GO:0005737 (cytoplasm)			0.0171364	0.180647		0.0847802	0.0286329	-0.193778		-0.167304	0.128176	-0.0782909					19.3606	37.2089	96.3917	-0.146589	3.68155	0.576262	0.462801	0.707527	0.506945	0.606531	0.677469	-0.302372	-0.400561	0.466662	0.325418		12.7132	14.4789	13.4195	12.8309	10.712	10.9475	13.8903	11.7715
ENSG00000188603	CLN3	PC	CLN3, battenin	This gene encodes a protein that is involved in lysosomal function. Mutations in this, as well as other neuronal ceroid-lipofuscinosis (CLN) genes, cause neurodegenerative diseases commonly known as Batten disease or collectively known as neuronal ceroid lipofuscinoses (NCLs). Many alternatively spliced transcript variants have been found for this gene. [provided by RefSeq, Jul 2008].	hsa04142 (Lysosome), GO:0001508 (action potential), GO:0001575 (globoside metabolic process), GO:0006520 (cellular amino acid metabolic process), GO:0006672 (ceramide metabolic process), GO:0006678 (glucosylceramide metabolic process), GO:0006681 (galactosylceramide metabolic process), GO:0006684 (sphingomyelin metabolic process), GO:0006898 (receptor-mediated endocytosis), GO:0007040 (lysosome o…			-0.205094	-0.297666		0.160208	0.287325	0.160208		-0.263312	-0.0144784	0.172809					19.2876	52.1965	44.7993	0.18114	4.49268	0.637917	0.440378	0.689615	0.469741	0.147837	0.252534	0.278839	0.28263	0.503645	0.497612		18.8344	17.5395	24.8378	27.3098	24.8378	18.0103	21.7772	25.0732
ENSG00000155876	RRAGA	PC	Ras related GTP binding A		hsa04140 (Autophagy - animal), hsa04150 (mTOR signaling pathway), GO:0006915 (apoptotic process), GO:0007050 (cell cycle arrest), GO:0008219 (cell death), GO:0010507 (negative regulation of autophagy), GO:0016236 (macroautophagy), GO:0016567 (protein ubiquitination), GO:0019048 (modulation by virus of host morphology or physiology), GO:0032008 (positive regulation of TOR signaling), GO:0034198 (c…			0.175671	-0.103733		0.205835	0.0593384	-0.103733		0.0145967	-0.192745	-0.0552302					19.1666	37.6676	58.315	-0.149663	3.71103	0.572187	0.46435	0.708748	0.509068	0.544476	0.635063	-0.29785	-0.374597	0.473681	0.36057		14.7143	11.7715	15.0675	13.4195	11.7715	12.9486	10.9475	12.2423
ENSG00000137942	FNBP1L	PC	formin binding protein 1 like	The protein encoded by this gene binds to both CDC42 and N-WASP. This protein promotes CDC42-induced actin polymerization by activating the N-WASP-WIP complex and, therefore, is involved in a pathway that links cell surface signals to the actin cytoskeleton. Alternative splicing results in multiple transcript variants encoding different isoforms. [provided by RefSeq, Jul 2008].	GO:0006900 (membrane budding), GO:0006914 (autophagy), GO:0010324 (membrane invagination), GO:0016050 (vesicle organization), GO:0030050 (vesicle transport along actin filament), GO:0051491 (positive regulation of filopodium assembly), GO:0060271 (cilium morphogenesis), GO:0061024 (membrane organization), GO:0072583 (clathrin-mediated endocytosis), GO:0097320 (membrane tubulation), GO:0005737 (cy…			-0.434651	0.280476		-0.118125	-0.2318	0.122916		0.0273255	0.212564	0.141296					18.8874	19.9894	89.0957	0.234631	2.75886	0.647216	0.437152	0.686981	0.452434	0.506336	0.59357	0.264575	0.330972	0.526586	0.423258		4.23773	8.24003	5.76802	5.17945	7.1806	6.59202	7.76917	7.29831
ENSG00000143384	MCL1	PC	MCL1, BCL2 family apoptosis regulator	This gene encodes an anti-apoptotic protein, which is a member of the Bcl-2 family. Alternative splicing results in multiple transcript variants. The longest gene product (isoform 1) enhances cell survival by inhibiting apoptosis while the alternatively spliced shorter gene products (isoform 2 and isoform 3) promote apoptosis and are death-inducing. [provided by RefSeq, Oct 2010].	hsa04151 (PI3K-Akt signaling pathway), hsa04210 (Apoptosis), hsa04630 (JAK-STAT signaling pathway), hsa05206 (MicroRNAs in cancer), GO:0001709 (cell fate determination), GO:0007275 (multicellular organismal development), GO:0008630 (intrinsic apoptotic signaling pathway in response to DNA damage), GO:0008637 (apoptotic mitochondrial changes), GO:0010507 (negative regulation of autophagy), GO:0019…			0.205785	-0.0762139		-0.152201	-0.221561	-0.177447		0.280762	-0.0335556	0.174433					18.7088	87.8881	82.9025	0.117567	6.99385	0.555695	0.470711	0.714459	0.503969	0.0765781	0.23887	0.289773	0.261896	0.486325	0.530936		145.849	119.598	113.359	107.944	111.358	153.735	123.247	142.67
ENSG00000097007	ABL1	PC	ABL proto-oncogene 1, non-receptor tyrosine kinase	This gene is a protooncogene that encodes a protein tyrosine kinase involved in a variety of cellular processes, including cell division, adhesion, differentiation, and response to stress. The activity of the protein is negatively regulated by its SH3 domain, whereby deletion of the region encoding this domain results in an oncogene. The ubiquitously expressed protein has DNA-binding activity tha…	hsa04012 (ErbB signaling pathway), hsa04014 (Ras signaling pathway), hsa04110 (Cell cycle), hsa04360 (Axon guidance), hsa04722 (Neurotrophin signaling pathway), hsa05130 (Pathogenic Escherichia coli infection), hsa05131 (Shigellosis), hsa05200 (Pathways in cancer), hsa05206 (MicroRNAs in cancer), hsa05220 (Chronic myeloid leukemia), hsa05416 (Viral myocarditis), GO:0001843 (neural tube closure), …			-0.244595	-0.0342994		0.142433	0.0993637	0.0675379		-0.145946	0.106342	0.00916478					18.3389	82.8864	93.1363	0.102691	6.47942	0.559234	0.469333	0.713178	0.524238	0.15124	0.252534	0.277174	0.305117	0.506303	0.46242		74.5134	86.5203	98.0563	95.1135	92.9946	79.9283	95.5843	89.2277
ENSG00000102882	MAPK3	PC	mitogen-activated protein kinase 3	The protein encoded by this gene is a member of the MAP kinase family. MAP kinases, also known as extracellular signal-regulated kinases (ERKs), act in a signaling cascade that regulates various cellular processes such as proliferation, differentiation, and cell cycle progression in response to a variety of extracellular signals. This kinase is activated by upstream kinases, resulting in its tran…	hsa01521 (EGFR tyrosine kinase inhibitor resistance), hsa01522 (Endocrine resistance), hsa01524 (Platinum drug resistance), hsa04010 (MAPK signaling pathway), hsa04012 (ErbB signaling pathway), hsa04014 (Ras signaling pathway), hsa04015 (Rap1 signaling pathway), hsa04022 (cGMP-PKG signaling pathway), hsa04024 (cAMP signaling pathway), hsa04062 (Chemokine signaling pathway), hsa04066 (HIF-1 signal…			-0.353968	-0.0394856		0.247801	0.172393	0.0474993		-0.197239	0.0627663	0.060233					17.8817	76.385	33.2686	0.127688	5.97676	0.520722	0.484705	0.723833	0.519447	0.15124	0.252534	0.277174	0.256299	0.506303	0.54007		48.263	60.5054	74.278	70.3934	64.3899	54.031	65.0962	64.9785
ENSG00000126934	MAP2K2	PC	mitogen-activated protein kinase kinase 2	The protein encoded by this gene is a dual specificity protein kinase that belongs to the MAP kinase kinase family. This kinase is known to play a critical role in mitogen growth factor signal transduction. It phosphorylates and thus activates MAPK1/ERK2 and MAPK2/ERK3. The activation of this kinase itself is dependent on the Ser/Thr phosphorylation by MAP kinase kinase kinases. Mutations in this…	hsa01521 (EGFR tyrosine kinase inhibitor resistance), hsa01522 (Endocrine resistance), hsa04010 (MAPK signaling pathway), hsa04012 (ErbB signaling pathway), hsa04014 (Ras signaling pathway), hsa04015 (Rap1 signaling pathway), hsa04022 (cGMP-PKG signaling pathway), hsa04024 (cAMP signaling pathway), hsa04066 (HIF-1 signaling pathway), hsa04068 (FoxO signaling pathway), hsa04071 (Sphingolipid signa…			-0.288217	0.139553		0.0212998	0.271188	0.240004		-0.329285	-0.0649101	0.010368					17.7708	95.3599	33.745	-0.108676	8.19566	0.358995	0.560488	0.779744	0.58355	0.128022	0.23887	-0.352767	-0.193329	0.391388	0.64644		237.077	319.595	294.287	350.319	342.785	230.368	277.1	292.05
ENSG00000198382	UVRAG	PC	UV radiation resistance associated	This gene complements the ultraviolet sensitivity of xeroderma pigmentosum group C cells and encodes a protein with a C2 domain. The protein activates the Beclin1-PI(3)KC3 complex, promoting autophagy and suppressing the proliferation and tumorigenicity of human colon cancer cells. Chromosomal aberrations involving this gene are associated with left-right axis malformation and mutations in this g…	hsa04140 (Autophagy - animal), GO:0006281 (DNA repair), GO:0006890 (retrograde vesicle-mediated transport, Golgi to ER), GO:0006914 (autophagy), GO:0007051 (spindle organization), GO:0007059 (chromosome segregation), GO:0032465 (regulation of cytokinesis), GO:0032801 (receptor catabolic process), GO:0035493 (SNARE complex assembly), GO:0046718 (viral entry into host cell), GO:0051297 (centrosome …			-0.08341	-0.0245085		-0.0438763	-0.103591	0.0504631		0.447165	0.104241	-0.346484					17.7501	22.0889	67.7195	0.213494	2.87047	0.583235	0.46017	0.705408	0.481443	0.757465	0.809219	0.251976	0.295925	0.547162	0.476682		6.47431	6.82745	6.70974	6.35659	7.29831	10.2412	7.65146	5.06173
ENSG00000142208	AKT1	PC	AKT serine/threonine kinase 1	The serine-threonine protein kinase encoded by the AKT1 gene is catalytically inactive in serum-starved primary and immortalized fibroblasts. AKT1 and the related AKT2 are activated by platelet-derived growth factor. The activation is rapid and specific, and it is abrogated by mutations in the pleckstrin homology domain of AKT1. It was shown that the activation occurs through phosphatidylinositol…	hsa01521 (EGFR tyrosine kinase inhibitor resistance), hsa01522 (Endocrine resistance), hsa01524 (Platinum drug resistance), hsa04010 (MAPK signaling pathway), hsa04012 (ErbB signaling pathway), hsa04014 (Ras signaling pathway), hsa04015 (Rap1 signaling pathway), hsa04022 (cGMP-PKG signaling pathway), hsa04024 (cAMP signaling pathway), hsa04062 (Chemokine signaling pathway), hsa04066 (HIF-1 signal…			-0.0207806	-0.268328		0.181569	0.0453095	-0.0105702		0.130815	-0.0331291	-0.024885					17.5137	81.6778	76.2417	0.14768	6.36844	1.22082	0.291403	0.554874	0.350633	0.208161	0.322233	0.138587	0.443571	0.743457	0.270959		80.87	67.8037	93.3478	84.7546	81.4586	90.0517	80.1637	80.6346
ENSG00000105221	AKT2	PC	AKT serine/threonine kinase 2	This gene is a putative oncogene encoding a protein belonging to a subfamily of serine/threonine kinases containing SH2-like (Src homology 2-like) domains. The gene was shown to be amplified and overexpressed in 2 of 8 ovarian carcinoma cell lines and 2 of 15 primary ovarian tumors. Overexpression contributes to the malignant phenotype of a subset of human ductal pancreatic cancers. The encoded p…	hsa01521 (EGFR tyrosine kinase inhibitor resistance), hsa01522 (Endocrine resistance), hsa01524 (Platinum drug resistance), hsa04010 (MAPK signaling pathway), hsa04012 (ErbB signaling pathway), hsa04014 (Ras signaling pathway), hsa04015 (Rap1 signaling pathway), hsa04022 (cGMP-PKG signaling pathway), hsa04024 (cAMP signaling pathway), hsa04062 (Chemokine signaling pathway), hsa04066 (HIF-1 signal…			-0.223097	0.0571724		0.0260973	0.326783	0.213125		-0.24459	-0.0102566	-0.145233					17.504	79.3843	36.0829	-0.107074	6.19414	0.342904	0.56928	0.785511	0.59781	0.128022	0.23887	-0.352767	-0.195627	0.391388	0.64245		61.6825	75.3374	73.6894	91.2289	84.166	60.7408	71.806	65.2139
ENSG00000154277	UCHL1	PC	ubiquitin C-terminal hydrolase L1	The protein encoded by this gene belongs to the peptidase C12 family. This enzyme is a thiol protease that hydrolyzes a peptide bond at the C-terminal glycine of ubiquitin. This gene is specifically expressed in the neurons and in cells of the diffuse neuroendocrine system. Mutations in this gene may be associated with Parkinson disease.[provided by RefSeq, Sep 2009]. Publication Note: This RefSe…	hsa05012 (Parkinson disease), GO:0002931 (response to ischemia), GO:0007412 (axon target recognition), GO:0007628 (adult walking behavior), GO:0008283 (cell proliferation), GO:0016241 (regulation of macroautophagy), GO:0016579 (protein deubiquitination), GO:0019233 (sensory perception of pain), GO:0019896 (axon transport of mitochondrion), GO:0042755 (eating behavior), GO:0043161 (proteasome-medi…			0.201678	-0.101339		0.0915163	-0.0365525	-0.0389603		-0.0166418	-0.0534924	-0.0462081					17.3144	93.2957	19.85	-0.097217	7.75414	0.804484	0.387839	0.647011	0.462324	0.706648	0.767958	-0.188982	-0.395378	0.654005	0.332302		247.789	200.468	229.426	209.768	209.414	212.71	207.296	208.355
ENSG00000204308	RNF5	PC	ring finger protein 5	The protein encoded by this gene contains a RING finger, which is a motif known to be involved in protein-protein interactions. This protein is a membrane-bound ubiquitin ligase. It can regulate cell motility by targeting paxillin ubiquitination and altering the distribution and localization of paxillin in cytoplasm and cell focal adhesions. [provided by RefSeq, Jul 2008]. Publication Note: This …	hsa04141 (Protein processing in endoplasmic reticulum), GO:0009617 (response to bacterium), GO:0010507 (negative regulation of autophagy), GO:0030433 (ER-associated ubiquitin-dependent protein catabolic process), GO:0031648 (protein destabilization), GO:0036503 (NA), GO:0042787 (protein ubiquitination involved in ubiquitin-dependent protein catabolic process), GO:0044257 (cellular protein catabol…			0.396634	0.0706682		-0.194795	-0.20088	-0.136484		0.128107	-0.00397115	-0.0592789					17.2719	90.6316	11.4954	-0.178642	7.31917	1.32257	0.273094	0.537302	0.302262	0.0621765	0.23887	-0.125988	-0.376571	0.76626	0.357839		208.708	166.095	137.844	137.255	143.612	172.923	157.62	151.617
ENSG00000178252	WDR6	PC	WD repeat domain 6	This gene encodes a member of the WD repeat protein family. WD repeats are minimally conserved regions of approximately 40 amino acids typically bracketed by gly-his and trp-asp (GH-WD), which may facilitate formation of heterotrimeric or multiprotein complexes. The encoded protein interacts with serine/threonine kinase 11, and is implicated in cell growth arrest. [provided by RefSeq, Aug 2008].	GO:0007050 (cell cycle arrest), GO:0008285 (negative regulation of cell proliferation), GO:0010507 (negative regulation of autophagy), GO:0005737 (cytoplasm), GO:0005829 (cytosol), GO:0005886 (plasma membrane), GO:0008180 (COP9 signalosome), GO:0003723 (RNA binding), GO:0005515 (protein binding)			-0.356942	-0.191061		0.195333	0.3124	0.223983		-0.135412	-0.0301669	-0.0181342					17.1234	78.6962	63.5906	0.141289	6.14549	0.491681	0.496888	0.733714	0.521845	0.0439369	0.23887	0.264575	0.224281	0.526586	0.593362		54.031	60.8585	80.1637	87.1089	81.8117	63.3305	68.2745	68.8631
ENSG00000166289	PLEKHF1	PC	pleckstrin homology and FYVE domain containing 1		GO:0006915 (apoptotic process), GO:0007032 (endosome organization), GO:0010508 (positive regulation of autophagy), GO:0016050 (vesicle organization), GO:0072659 (protein localization to plasma membrane), GO:2001244 (positive regulation of intrinsic apoptotic signaling pathway), GO:0005634 (nucleus), GO:0005764 (lysosome), GO:0005765 (lysosomal membrane), GO:0005768 (endosome), GO:0010008 (endosom…			-0.301205	0.0126366		0.323697	0.457228	0.157037		-0.197172	-0.328429	-0.123793					16.7721	39.7406	34.6978	-0.190609	3.81121	0.40527	0.536636	0.764286	0.552468	0.0765781	0.23887	-0.289773	-0.204185	0.486325	0.62766		10.5943	13.6549	17.4218	19.3052	15.3029	11.536	10.3589	12.2423
ENSG00000169228	RAB24	PC	RAB24, member RAS oncogene family	RAB24 is a small GTPase of the Rab subfamily of Ras-related proteins that regulate intracellular protein trafficking (Olkkonen et al., 1993 [PubMed 8126105]).[supplied by OMIM, Aug 2009].	GO:0006914 (autophagy), GO:0015031 (protein transport), GO:0043312 (neutrophil degranulation), GO:0005739 (mitochondrion), GO:0005776 (autophagic vacuole), GO:0005829 (cytosol), GO:0005886 (plasma membrane), GO:0030667 (secretory granule membrane), GO:0003924 (GTPase activity), GO:0005515 (protein binding), GO:0005525 (GTP binding), R-HSA-168249 (Homo sapiens: Innate Immune System), R-HSA-168256 …			-0.123749	-0.0647536		0.00575152	-0.0127155	0.192654		0.0239852	0.133003	-0.154176					16.7124	79.0402	37.5121	0.0844278	6.17399	0.401003	0.538752	0.766075	0.594486	0.362805	0.46944	0.289773	0.276391	0.486325	0.507555		65.6848	68.51	72.0414	71.0997	82.2826	72.9831	78.8688	64.2722
ENSG00000145632	PLK2	PC	polo like kinase 2	The protein encoded by this gene is a member of the polo family of serine/threonine protein kinases that have a role in normal cell division. This gene is most abundantly expressed in testis, spleen and fetal tissues, and its expression is inducible by serum, suggesting that it may also play an important role in cells undergoing rapid cell division. Alternatively spliced transcript variants encod…	hsa04068 (FoxO signaling pathway), GO:0000082 (G1/S transition of mitotic cell cycle), GO:0006468 (protein phosphorylation), GO:0006977 (DNA damage response, signal transduction by p53 class mediator resulting in cell cycle arrest), GO:0007052 (mitotic spindle organization), GO:0007093 (mitotic cell cycle checkpoint), GO:0007265 (Ras protein signal transduction), GO:0007613 (memory), GO:0010508 (…			0.067164	0.0546368		-0.153672	-0.190478	-0.0908582		0.185837	0.000148325	0.127222					16.6333	90.2523	20.7146	0.0791682	7.27408	0.395392	0.54156	0.768255	0.590963	0.0765781	0.23887	0.289773	0.25777	0.486325	0.537663		161.387	159.974	138.197	134.666	144.436	175.395	153.971	168.332
ENSG00000186815	TPCN1	PC	two pore segment channel 1	Voltage-gated Ca(2+) and Na+ channels have 4 homologous domains, each containing 6 transmembrane segments, S1 to S6. TPCN1 is similar to these channels, but it has only 2 domains containing S1 to S6 (Ishibashi et al., 2000 [PubMed 10753632]).[supplied by OMIM, Mar 2008].	GO:0010508 (positive regulation of autophagy), GO:0034220 (ion transmembrane transport), GO:0034765 (regulation of ion transmembrane transport), GO:0051209 (release of sequestered calcium ion into cytosol), GO:0086010 (membrane depolarization during action potential), GO:0005764 (lysosome), GO:0005765 (lysosomal membrane), GO:0005768 (endosome), GO:0005886 (plasma membrane), GO:0010008 (endosome …			-0.275636	-0.167875		0.158429	0.136469	0.287591		-0.0985247	0.0069052	-0.0473582					16.3365	62.2706	57.1063	0.124531	5.06184	0.428863	0.525213	0.755464	0.561558	0.0439369	0.23887	0.264575	0.23988	0.526586	0.567182		26.839	29.0755	36.9624	36.3738	40.6116	30.6058	33.0778	31.783
ENSG00000167110	GOLGA2	PC	golgin A2	The Golgi apparatus, which participates in glycosylation and transport of proteins and lipids in the secretory pathway, consists of a series of stacked cisternae (flattened membrane sacs). Interactions between the Golgi and microtubules are thought to be important for the reorganization of the Golgi after it fragments during mitosis. This gene encodes one of the golgins, a family of proteins loca…	GO:0006486 (protein glycosylation), GO:0006888 (ER to Golgi vesicle-mediated transport), GO:0007020 (microtubule nucleation), GO:0008356 (asymmetric cell division), GO:0010507 (negative regulation of autophagy), GO:0032091 (negative regulation of protein binding), GO:0048208 (COPII vesicle coating), GO:0051225 (spindle assembly), GO:0051289 (protein homotetramerization), GO:0051297 (centrosome or…			0.206569	0.106538		-0.00894265	-0.12576	-0.178873		0.110232	-0.267184	0.15742					16.2763	67.1313	54.195	-0.124155	5.36251	0.574473	0.46348	0.708007	0.504795	0.290512	0.393599	-0.21418	-0.305482	0.610525	0.461857		47.2036	43.9076	40.3761	37.0801	35.6676	44.0253	33.431	45.5556
ENSG00000176108	CHMP6	PC	charged multivesicular body protein 6	This gene encodes a member of the chromatin-modifying protein/charged multivesicular body protein family. Proteins in this family are part of the ESCRT-III (endosomal sorting complex required for transport III) which degrades surface receptors, and in biosynthesis of endosomes. [provided by RefSeq, Mar 2012]. Publication Note: This RefSeq record includes a subset of the publications that are avai…	hsa04144 (Endocytosis), hsa04217 (Necroptosis), GO:0000920 (cytokinetic cell separation), GO:0006997 (nucleus organization), GO:0007034 (vacuolar transport), GO:0007080 (mitotic metaphase plate congression), GO:0015031 (protein transport), GO:0016197 (endosomal transport), GO:0016236 (macroautophagy), GO:0019058 (viral life cycle), GO:0036258 (multivesicular body assembly), GO:0039702 (viral budd…			-0.164563	-0.222053		0.0928428	0.193013	0.193013		-0.00468019	-0.142194	0.054621					16.2361	41.9548	17.3798	0.133814	3.92739	0.417451	0.53068	0.759857	0.570945	0.0423134	0.23887	0.266164	0.285602	0.524011	0.492905		13.0663	12.4778	16.0092	17.3041	17.3041	14.8321	13.3018	15.5383
ENSG00000032742	IFT88	PC	intraflagellar transport 88	This gene encodes a member of the tetratrico peptide repeat (TPR) family. Mutations of a similar gene in mouse can cause polycystic kidney disease. Two transcript variants encoding distinct isoforms have been identified for this gene. [provided by RefSeq, Jul 2008].	GO:0035735 (intraciliary transport involved in cilium morphogenesis), GO:0060271 (cilium morphogenesis), GO:1902017 (regulation of cilium assembly), GO:2000785 (regulation of autophagic vacuole assembly), GO:0005814 (centriole), GO:0005929 (cilium), GO:0030992 (intraciliary transport particle B), GO:0031514 (motile cilium), GO:0036064 (ciliary basal body), GO:0097542 (ciliary tip), GO:0005515 (pr…			0.393774	-0.0537416		0.0516264	-0.215518	0.0311595		0.0516264	0.111341	-0.370268					16.1796	18.5427	63.0701	-0.297759	2.67492	1.12301	0.310658	0.573554	0.32602	0.754934	0.809219	-0.126745	-0.42596	0.764886	0.292675		8.59317	5.76802	6.35659	4.94402	6.23888	6.35659	6.70974	4.23773
ENSG00000171700	RGS19	PC	regulator of G protein signaling 19	G proteins mediate a number of cellular processes. The protein encoded by this gene belongs to the RGS (regulators of G-protein signaling) family and specifically interacts with G protein, GAI3. This protein is a guanosine triphosphatase-activating protein that functions to down-regulate Galpha i/Galpha q-linked signaling. Alternatively spliced transcript variants encoding the same protein isofor…	GO:0006914 (autophagy), GO:0007186 (G-protein coupled receptor signaling pathway), GO:0007264 (small GTPase mediated signal transduction), GO:0009968 (negative regulation of signal transduction), GO:0043547 (positive regulation of GTPase activity), GO:0005794 (Golgi apparatus), GO:0005834 (heterotrimeric G-protein complex), GO:0005903 (brush border), GO:0016020 (membrane), GO:0030136 (clathrin-co…			-0.0877499	-0.331704		0.3393	0.0928408	0.0642688		0.0351196	-0.0560376	-0.0560376					15.9783	29.3843	25.4698	0.158198	3.25988	0.398121	0.540191	0.767177	0.568996	0.0423134	0.23887	0.266164	0.262346	0.524011	0.530205		8.59317	6.94517	12.2423	10.0057	9.77032	9.53489	8.8286	8.8286
ENSG00000129515	SNX6	PC	sorting nexin 6	This gene encodes a member of the sorting nexin family. Members of this family contain a phox (PX) domain, which is a phosphoinositide binding domain, and are involved in intracellular trafficking. This protein associates with the long isoform of the leptin receptor, the transforming growth factor-beta family of receptor serine-threonine kinases, and with receptor tyrosine kinases for platelet-de…	hsa04144 (Endocytosis), GO:0006886 (intracellular protein transport), GO:0006897 (endocytosis), GO:0007175 (negative regulation of epidermal growth factor-activated receptor activity), GO:0016050 (vesicle organization), GO:0016241 (regulation of macroautophagy), GO:0030512 (negative regulation of transforming growth factor beta receptor signaling pathway), GO:0042147 (retrograde transport, endoso…			0.0565244	-0.0503943		0.12959	-0.315458	-0.0605189		0.173446	0.249175	-0.182364					15.7346	62.2618	36.0035	0.112065	5.05993	0.383701	0.547502	0.772142	0.581493	0.506336	0.59357	0.264575	0.243822	0.526586	0.56063		34.255	31.6653	36.1384	26.0149	31.4298	37.3156	39.4344	28.7224
ENSG00000149311	ATM	PC	ATM serine/threonine kinase	The protein encoded by this gene belongs to the PI3/PI4-kinase family. This protein is an important cell cycle checkpoint kinase that phosphorylates; thus, it functions as a regulator of a wide variety of downstream proteins, including tumor suppressor proteins p53 and BRCA1, checkpoint kinase CHK2, checkpoint proteins RAD17 and RAD9, and DNA repair protein NBS1. This protein and the closely rela…	hsa01524 (Platinum drug resistance), hsa03440 (Homologous recombination), hsa04064 (NF-kappa B signaling pathway), hsa04068 (FoxO signaling pathway), hsa04110 (Cell cycle), hsa04115 (p53 signaling pathway), hsa04210 (Apoptosis), hsa04218 (Cellular senescence), hsa05165 (Human papillomavirus infection), hsa05166 (Human T-cell leukemia virus 1 infection), hsa05170 (Human immunodeficiency virus 1 in…			0.0178652	0.173534		-0.285957	-0.585568	-0.0764743		0.656663	0.157044	-0.0571064					15.6941	23.5268	76.6034	0.319634	2.94127	0.832932	0.379847	0.640099	0.385527	0.082085	0.23887	0.151186	0.308902	0.720817	0.456599		7.29831	8.35774	5.53259	4.12001	6.70974	12.4778	8.24003	6.82745
ENSG00000100292	HMOX1	PC	heme oxygenase 1	Heme oxygenase, an essential enzyme in heme catabolism, cleaves heme to form biliverdin, which is subsequently converted to bilirubin by biliverdin reductase, and carbon monoxide, a putative neurotransmitter. Heme oxygenase activity is induced by its substrate heme and by various nonheme substances. Heme oxygenase occurs as 2 isozymes, an inducible heme oxygenase-1 and a constitutive heme oxygena…	hsa00860 (Porphyrin and chlorophyll metabolism), hsa01100 (Metabolic pathways), hsa04066 (HIF-1 signaling pathway), hsa04216 (Ferroptosis), hsa04978 (Mineral absorption), hsa05200 (Pathways in cancer), hsa05206 (MicroRNAs in cancer), hsa05225 (Hepatocellular carcinoma), hsa05418 (Fluid shear stress and atherosclerosis), GO:0001525 (angiogenesis), GO:0001935 (endothelial cell proliferation), GO:00…			-0.438257	-0.197885		0.574385	0.615609	0.505874		-0.348309	-0.455231	-0.256186					15.2956	56.7043	21.8615	-0.24041	4.74863	0.306602	0.590198	0.799054	0.58391	0.0765781	0.23887	-0.289773	-0.146326	0.486325	0.729529		18.1281	21.7772	38.6104	39.7876	36.727	19.4229	17.8926	20.8355
ENSG00000154174	TOMM70	PC	translocase of outer mitochondrial membrane 70	This gene encodes an import receptor of the outer mitochondrial membrane that is part of the translocase of the outer membrane complex. This protein is involved in the import of mitochondrial precursor proteins. [provided by RefSeq, Oct 2011]. Publication Note: This RefSeq record includes a subset of the publications that are available for this gene. Please see the Gene record to access additiona…	GO:0006626 (protein targeting to mitochondrion), GO:0016236 (macroautophagy), GO:0071806 (protein transmembrane transport), GO:0005739 (mitochondrion), GO:0005741 (mitochondrial outer membrane), GO:0005742 (mitochondrial outer membrane translocase complex), GO:0016020 (membrane), GO:0016021 (integral component of membrane), GO:0070062 (extracellular vesicular exosome), GO:0005515 (protein binding…			0.0614656	0.629912		-0.194201	-0.416605	-0.293216		0.191106	0.0490814	-0.0275432					15.1405	55.0635	73.0304	-0.252702	4.6582	0.95959	0.347111	0.609386	0.35841	0.0621765	0.23887	-0.125988	-0.3152	0.76626	0.446977		25.5441	38.8458	21.0709	17.7749	19.5406	28.1338	25.3087	23.8961
ENSG00000164733	CTSB	PC	cathepsin B	The protein encoded by this gene is a lysosomal cysteine proteinase composed of a dimer of disulfide-linked heavy and light chains, both produced from a single protein precursor. It is also known as amyloid precursor protein secretase and is involved in the proteolytic processing of amyloid precursor protein (APP). Incomplete proteolytic processing of APP has been suggested to be a causative fact…	hsa04140 (Autophagy - animal), hsa04142 (Lysosome), hsa04210 (Apoptosis), hsa04612 (Antigen processing and presentation), hsa04621 (NOD-like receptor signaling pathway), hsa04924 (Renin secretion), GO:0002224 (toll-like receptor signaling pathway), GO:0006508 (proteolysis), GO:0030574 (collagen catabolic process), GO:0030855 (epithelial cell differentiation), GO:0042981 (regulation of apoptotic p…			-0.0611068	0.0353479		0.0559922	-0.0446705	-0.0708297		0.00898416	0.0721937	0.00408903					15.0561	95.6775	23.3348	0.0452616	8.27263	0.240698	0.632774	0.826415	0.700938	0.573753	0.646528	0.327569	0.349722	0.428329	0.395775		295.935	316.535	321.126	299.348	293.934	310.767	324.775	309.707
ENSG00000089006	SNX5	PC	sorting nexin 5	This gene encodes a member of the sorting nexin family. Members of this family contain a phox (PX) domain, which is a phosphoinositide binding domain, and are involved in intracellular trafficking. This protein functions in endosomal sorting, the phosphoinositide-signaling pathway, and macropinocytosis. This gene may play a role in the tumorigenesis of papillary thyroid carcinoma. Alternative spl…	hsa04144 (Endocytosis), GO:0006886 (intracellular protein transport), GO:0006907 (pinocytosis), GO:0016050 (vesicle organization), GO:0016241 (regulation of macroautophagy), GO:0042147 (retrograde transport, endosome to Golgi), GO:0001726 (ruffle), GO:0001891 (phagocytic cup), GO:0005829 (cytosol), GO:0030659 (cytoplasmic vesicle membrane), GO:0030904 (retromer complex), GO:0030905 (retromer comp…			0.110213	0.433971		-0.344953	-0.242289	-0.114087		0.128361	-0.0136607	0.0424454					14.9083	77.964	43.5289	-0.179955	6.08798	0.922724	0.356192	0.617966	0.37911	0.0621765	0.23887	-0.125988	-0.32346	0.76626	0.434487		72.3945	91.1112	52.2653	56.2676	61.6825	73.3363	66.2734	68.9808
ENSG00000159363	ATP13A2	PC	ATPase cation transporting 13A2	This gene encodes a member of the P5 subfamily of ATPases which transports inorganic cations as well as other substrates. Mutations in this gene are associated with Kufor-Rakeb syndrome (KRS), also referred to as Parkinson disease 9. Multiple transcript variants encoding different isoforms have been found for this gene.[provided by RefSeq, Nov 2008].	GO:0006874 (cellular calcium ion homeostasis), GO:0006879 (cellular iron ion homeostasis), GO:0006882 (cellular zinc ion homeostasis), GO:0010821 (regulation of mitochondrion organization), GO:0016241 (regulation of macroautophagy), GO:0016243 (regulation of autophagic vacuole size), GO:0030003 (cellular cation homeostasis), GO:0033157 (regulation of intracellular protein transport), GO:0034220 (…			-0.112848	-0.090708		0.145232	0.331653	0.175996		-0.181383	0.0354391	-0.30338					14.2428	52.964	56.0829	-0.108457	4.53359	0.245164	0.629669	0.824145	0.655987	0.0765781	0.23887	-0.289773	-0.180146	0.486325	0.669462		20.8355	21.1886	25.3087	29.0755	25.8972	19.7761	23.3075	18.0103
ENSG00000278139	AL358075.4	PC	-PIK3R3 readthrough		hsa01521 (EGFR tyrosine kinase inhibitor resistance), hsa01522 (Endocrine resistance), hsa01524 (Platinum drug resistance), hsa04012 (ErbB signaling pathway), hsa04014 (Ras signaling pathway), hsa04015 (Rap1 signaling pathway), hsa04024 (cAMP signaling pathway), hsa04062 (Chemokine signaling pathway), hsa04066 (HIF-1 signaling pathway), hsa04068 (FoxO signaling pathway), hsa04070 (Phosphatidylino…			0.0699464	0.13008		0.0699464	0.100326	-0.162767		-0.530601	-0.0252313	0.3483					14.1147	4.05787	56.5152	-0.192219	1.83818	0.262599	0.617876	0.818157	0.619944	0.70123	0.767958	-0.272501	-0.212868	0.51379	0.612765		3.53144	3.76687	3.53144	3.64916	2.70744	1.64801	3.1783	4.70859
ENSG00000140443	IGF1R	PC	insulin like growth factor 1 receptor	This receptor binds insulin-like growth factor with a high affinity. It has tyrosine kinase activity. The insulin-like growth factor I receptor plays a critical role in transformation events. Cleavage of the precursor generates alpha and beta subunits. It is highly overexpressed in most malignant tissues where it functions as an anti-apoptotic agent by enhancing cell survival. Alternatively splic…	hsa01521 (EGFR tyrosine kinase inhibitor resistance), hsa01522 (Endocrine resistance), hsa04010 (MAPK signaling pathway), hsa04014 (Ras signaling pathway), hsa04015 (Rap1 signaling pathway), hsa04066 (HIF-1 signaling pathway), hsa04068 (FoxO signaling pathway), hsa04114 (Oocyte meiosis), hsa04140 (Autophagy - animal), hsa04144 (Endocytosis), hsa04150 (mTOR signaling pathway), hsa04151 (PI3K-Akt s…			0.216764	-0.244879		-0.221416	0.146367	-0.221416		0.199484	0.0912183	0.0338777					13.369	20.2011	72.6599	0.165419	2.76823	0.386367	0.546136	0.771463	0.566234	0.703698	0.767958	0.190117	0.281543	0.652027	0.499339		7.88688	5.17945	5.29716	7.41603	5.29716	7.76917	7.06288	6.70974
ENSG00000141971	MVB12A	PC	multivesicular body subunit 12A		hsa04144 (Endocytosis), GO:0015031 (protein transport), GO:0016236 (macroautophagy), GO:0019075 (virus maturation), GO:0036258 (multivesicular body assembly), GO:0039702 (viral budding via host ESCRT complex), GO:0042058 (regulation of epidermal growth factor receptor signaling pathway), GO:0043162 (ubiquitin-dependent protein catabolic process via the multivesicular body sorting pathway), GO:004…			-0.448355	-0.122267		0.16815	0.297745	0.234402		-0.344112	0.107219	0.107219					13.0938	73.4562	16.7711	0.185174	5.77678	0.65009	0.436162	0.686904	0.453873	0.0601301	0.23887	0.126745	0.258707	0.764886	0.536134		38.8458	49.2047	60.6231	66.5088	63.5659	41.9064	58.0333	58.0333
ENSG00000114573	ATP6V1A	PC	ATPase H+ transporting V1 subunit A	This gene encodes a component of vacuolar ATPase (V-ATPase), a multisubunit enzyme that mediates acidification of eukaryotic intracellular organelles. V-ATPase dependent organelle acidification is necessary for such intracellular processes as protein sorting, zymogen activation, receptor-mediated endocytosis, and synaptic vesicle proton gradient generation. V-ATPase is composed of a cytosolic V1 …	hsa00190 (Oxidative phosphorylation), hsa01100 (Metabolic pathways), hsa04145 (Phagosome), hsa04150 (mTOR signaling pathway), hsa04721 (Synaptic vesicle cycle), hsa04966 (Collecting duct acid secretion), hsa05110 (Vibrio cholerae infection), hsa05120 (Epithelial cell signaling in Helicobacter pylori infection), hsa05165 (Human papillomavirus infection), hsa05323 (Rheumatoid arthritis), GO:0006810…			-0.240076	0.293099		-0.19003	-0.173726	0.022986		0.13193	0.118754	0.0370626					12.9838	31.0427	56.9828	0.0868358	3.34173	0.139044	0.7159	0.871333	0.735053	0.324652	0.42701	0.340168	0.168132	0.40968	0.690644		8.0046	12.4778	8.35774	8.47546	10.0057	10.9475	10.8298	10.1235
ENSG00000014216	CAPN1	PC	calpain 1	The calpains, calcium-activated neutral proteases, are nonlysosomal, intracellular cysteine proteases. The mammalian calpains include ubiquitous, stomach-specific, and muscle-specific proteins. The ubiquitous enzymes consist of heterodimers with distinct large, catalytic subunits associated with a common small, regulatory subunit. This gene encodes the large subunit of the ubiquitous enzyme, calp…	hsa04141 (Protein processing in endoplasmic reticulum), hsa04210 (Apoptosis), hsa04217 (Necroptosis), hsa04218 (Cellular senescence), hsa05010 (Alzheimer disease), GO:0006508 (proteolysis), GO:0008284 (positive regulation of cell proliferation), GO:0016241 (regulation of macroautophagy), GO:0022617 (extracellular matrix disassembly), GO:0032801 (receptor catabolic process), GO:0043312 (neutrophil…			-0.159005	0.131915		-0.0299982	0.150053	0.0843182		-0.144515	-0.000993741	-0.0317749					12.9595	92.4312	32.1217	-0.0684676	7.60063	0.321801	0.581248	0.792998	0.633656	0.388896	0.486699	-0.201581	-0.237578	0.63215	0.571019		172.923	212.004	189.285	214.712	205.059	174.689	193.17	189.05
ENSG00000225190	PLEKHM1	PC	pleckstrin homology and RUN domain containing M1	The protein encoded by this gene is essential for bone resorption, and may play a critical role in vesicular transport in the osteoclast. Mutations in this gene are associated with autosomal recessive osteopetrosis type 6 (OPTB6). Alternatively spliced transcript variants have been found for this gene. [provided by RefSeq, Sep 2009].	GO:0006914 (autophagy), GO:0015031 (protein transport), GO:0035556 (intracellular signal transduction), GO:0005730 (nucleolus), GO:0005765 (lysosomal membrane), GO:0010008 (endosome membrane), GO:0043231 (intracellular membrane-bounded organelle), GO:0046872 (metal ion binding)			-0.188444	-0.192681		0.159488	0.289723	0.112181		-0.0436475	-0.00215428	-0.134465					12.871	68.7632	60.6793	0.0806462	5.46843	0.204902	0.659071	0.839276	0.689362	0.0439369	0.23887	0.264575	0.165675	0.526586	0.694998		38.1396	38.0218	49.087	53.9133	47.439	42.3773	43.6722	39.6699
ENSG00000102096	PIM2	PC	Pim-2 proto-oncogene, serine/threonine kinase	This gene encodes a protooncogene that acts as a serine/threonine protein kinase. Studies determined the encoded protein functions to prevent apoptosis and to promote cell survival.[provided by RefSeq, Nov 2009]. Publication Note: This RefSeq record includes a subset of the publications that are available for this gene. Please see the Gene record to access additional publications.	hsa05200 (Pathways in cancer), hsa05221 (Acute myeloid leukemia), GO:0000082 (G1/S transition of mitotic cell cycle), GO:0006468 (protein phosphorylation), GO:0006915 (apoptotic process), GO:0007140 (male meiosis), GO:0007346 (regulation of mitotic cell cycle), GO:0008283 (cell proliferation), GO:0008285 (negative regulation of cell proliferation), GO:0009615 (response to virus), GO:0010508 (posi…			0.134605	-0.106931		-0.00919024	-0.301513	0.0281245		0.296276	-0.175976	0.134605					12.789	55.3634	37.918	0.108596	4.67658	0.32144	0.581457	0.792998	0.613268	0.544476	0.635063	0.196455	0.226605	0.641016	0.589437		27.7807	23.1898	24.9555	20.0115	25.6618	31.3121	22.0126	27.7807
ENSG00000198793	MTOR	PC	mechanistic target of rapamycin kinase	The protein encoded by this gene belongs to a family of phosphatidylinositol kinase-related kinases. These kinases mediate cellular responses to stresses such as DNA damage and nutrient deprivation. This protein acts as the target for the cell-cycle arrest and immunosuppressive effects of the FKBP12-rapamycin complex. The ANGPTL7 gene is located in an intron of this gene. [provided by RefSeq, Sep…	hsa01521 (EGFR tyrosine kinase inhibitor resistance), hsa01522 (Endocrine resistance), hsa04012 (ErbB signaling pathway), hsa04066 (HIF-1 signaling pathway), hsa04072 (Phospholipase D signaling pathway), hsa04136 (Autophagy - other), hsa04140 (Autophagy - animal), hsa04150 (mTOR signaling pathway), hsa04151 (PI3K-Akt signaling pathway), hsa04152 (AMPK signaling pathway), hsa04211 (Longevity regul…			0.194411	-0.0233339		-0.103006	-0.0108859	-0.0258365		0.0497925	-0.156845	0.0757032					12.6732	77.7788	85.7521	-0.0859035	6.07544	0.462554	0.509666	0.744341	0.571122	0.485672	0.577441	-0.151186	-0.324203	0.720817	0.433371		76.9854	65.9202	62.2711	66.5088	65.8025	69.4517	59.9168	70.7465
ENSG00000117410	ATP6V0B	PC	ATPase H+ transporting V0 subunit b	This gene encodes a portion of the V0 domain of vacuolar ATPase (V-ATPase), a multisubunit enzyme that mediates acidification of eukaryotic intracellular organelles. Activity of this enzyme is necessary for such varied processes as protein sorting, zymogen activation, receptor-mediated endocytosis, and synaptic vesicle proton gradient generation. Alternative splicing results in multiple transcrip…	hsa00190 (Oxidative phosphorylation), hsa01100 (Metabolic pathways), hsa04142 (Lysosome), hsa04145 (Phagosome), hsa04721 (Synaptic vesicle cycle), hsa05110 (Vibrio cholerae infection), hsa05120 (Epithelial cell signaling in Helicobacter pylori infection), hsa05152 (Tuberculosis), hsa05165 (Human papillomavirus infection), hsa05323 (Rheumatoid arthritis), GO:0007035 (vacuolar acidification), GO:00…			-0.429861	-0.0106508		0.193561	0.131247	0.198972		-0.0876132	0.00410642	0.000237545					12.6629	93.428	24.1641	0.129271	7.776	0.597786	0.454761	0.701404	0.486534	0.0621765	0.23887	0.125988	0.261633	0.76626	0.531365		160.681	215.536	248.613	238.019	249.555	204.235	217.772	217.184
ENSG00000127580	WDR24	PC	WD repeat domain 24		hsa04150 (mTOR signaling pathway), GO:0006914 (autophagy), GO:0010506 (regulation of autophagy), GO:0032008 (positive regulation of TOR signaling), GO:0034198 (cellular response to amino acid starvation), GO:0061700 (NA), GO:0005515 (protein binding)			-0.461119	0.111519		0.196059	0.529693	0.219331		-0.479737	-0.176633	0.0608884					12.6353	33.645	79.453	-0.145191	3.48512	0.166053	0.691	0.856535	0.697001	0.0765781	0.23887	-0.289773	-0.131604	0.486325	0.756077		7.1806	11.6538	12.4778	16.2446	12.7132	7.06288	9.18175	11.1829
ENSG00000068903	SIRT2	PC	sirtuin 2	This gene encodes a member of the sirtuin family of proteins, homologs to the yeast Sir2 protein. Members of the sirtuin family are characterized by a sirtuin core domain and grouped into four classes. The functions of human sirtuins have not yet been determined; however, yeast sirtuin proteins are known to regulate epigenetic gene silencing and suppress recombination of rDNA. Studies suggest tha…	GO:0000122 (negative regulation of transcription from RNA polymerase II promoter), GO:0000183 (chromatin silencing at rDNA), GO:0006342 (chromatin silencing), GO:0006348 (chromatin silencing at telomere), GO:0006351 (transcription, DNA-templated), GO:0006471 (protein ADP-ribosylation), GO:0006476 (protein deacetylation), GO:0006914 (autophagy), GO:0007067 (mitotic nuclear division), GO:0007096 (r…			-0.0753371	-0.026883		0.0403527	0.0802232	-0.0482175		-0.0890905	0.111826	0.00712653					12.5913	76.5879	40.4411	0.0579813	5.99252	0.244631	0.630037	0.824437	0.689969	0.573753	0.646528	0.226779	0.315338	0.589144	0.446768		60.0345	62.1534	65.2139	67.0974	61.2116	59.4459	68.6277	63.6837
ENSG00000047249	ATP6V1H	PC	ATPase H+ transporting V1 subunit H	This gene encodes a component of vacuolar ATPase (V-ATPase), a multisubunit enzyme that mediates acidification of intracellular organelles. V-ATPase-dependent organelle acidification is necessary for multiple processes including protein sorting, zymogen activation, receptor-mediated endocytosis, and synaptic vesicle proton gradient generation. The encoded protein is the regulatory H subunit of th…	hsa00190 (Oxidative phosphorylation), hsa01100 (Metabolic pathways), hsa04142 (Lysosome), hsa04145 (Phagosome), hsa04150 (mTOR signaling pathway), hsa04721 (Synaptic vesicle cycle), hsa05110 (Vibrio cholerae infection), hsa05120 (Epithelial cell signaling in Helicobacter pylori infection), hsa05152 (Tuberculosis), hsa05165 (Human papillomavirus infection), hsa05323 (Rheumatoid arthritis), GO:0006…			0.0824971	-0.0550085		-0.110458	0.0210022	-0.0788556		0.151761	0.0299493	-0.0408872					12.3478	79.2078	21.0498	0.0481297	6.18891	0.16562	0.69138	0.856556	0.738949	0.235877	0.342764	0.277174	0.223567	0.506303	0.594571		76.9854	69.8048	67.0974	73.6894	68.6277	80.87	74.1603	70.5111
ENSG00000172071	EIF2AK3	PC	eukaryotic translation initiation factor 2 alpha kinase 3	The protein encoded by this gene phosphorylates the alpha subunit of eukaryotic translation-initiation factor 2 (EIF2), leading to its inactivation, and thus to a rapid reduction of translational initiation and repression of global protein synthesis. It is a type I membrane protein located in the endoplasmic reticulum (ER), where it is induced by ER stress caused by malfolded proteins. Mutations …	hsa04137 (Mitophagy - animal), hsa04140 (Autophagy - animal), hsa04141 (Protein processing in endoplasmic reticulum), hsa04210 (Apoptosis), hsa04932 (Non-alcoholic fatty liver disease (NAFLD)), hsa05010 (Alzheimer disease), hsa05160 (Hepatitis C), hsa05162 (Measles), hsa05164 (Influenza A), hsa05168 (Herpes simplex infection), GO:0001501 (skeletal system development), GO:0001503 (ossification), G…			-0.233726	0.398625		-0.282644	-0.186413	-0.163326		0.268843	0.251768	-0.0531265					12.2563	19.566	79.5412	0.123742	2.73673	0.161567	0.694964	0.858777	0.706311	0.235877	0.342764	0.277174	0.156057	0.506303	0.712109		5.06173	8.94632	4.8263	5.29716	5.41488	8.0046	7.88688	6.00345
ENSG00000197217	ENTPD4	PC	ectonucleoside triphosphate diphosphohydrolase 4	This gene encodes a member of the apyrase protein family. Apyrases are enzymes that catalyze the hydrolysis of nucleotide diphosphates and triphosphates in a calcium or magnesium-dependent manner. The encoded protein is an endo-apyrase and may play a role in salvaging nucleotides from lysosomes. Alternatively spliced transcript variants encoding multiple isoforms have been observed for this gene,…	hsa00230 (Purine metabolism), hsa00240 (Pyrimidine metabolism), hsa04142 (Lysosome), GO:0006256 (UDP catabolic process), GO:0055086 (nucleobase-containing small molecule metabolic process), GO:0000139 (Golgi membrane), GO:0030173 (integral component of Golgi membrane), GO:0031410 (cytoplasmic vesicle), GO:0097637 (integral component of autophagic vacuole membrane), GO:0017110 (nucleoside-diphosph…			-0.41563	0.00836249		0.172345	0.117666	0.154348		-0.184292	0.0608322	0.0863684					12.2109	53.3963	53.1628	0.15066	4.568	0.539927	0.476933	0.718105	0.511843	0.0621765	0.23887	0.125988	0.291306	0.76626	0.483915		16.9509	23.4252	26.4858	25.4264	26.1327	20.2469	24.3669	24.8378
ENSG00000136874	STX17	PC	syntaxin 17		hsa04130 (SNARE interactions in vesicular transport), hsa04140 (Autophagy - animal), GO:0006886 (intracellular protein transport), GO:0006887 (exocytosis), GO:0006888 (ER to Golgi vesicle-mediated transport), GO:0006906 (vesicle fusion), GO:0007030 (Golgi organization), GO:0016240 (autophagic vacuole docking), GO:0034497 (protein localization to pre-autophagosomal structure), GO:0048278 (vesicle …			-0.00199002	0.239067		-0.0691195	0.0931877	-0.291568		0.239067	-0.139526	-0.0691195					12.0836	3.33451	33.7362	-0.131583	1.78988	0.169883	0.687667	0.854316	0.701617	0.455629	0.551581	-0.261406	-0.19297	0.531734	0.647063		3.1783	4.12001	2.94287	3.53144	2.23658	4.12001	2.70744	2.94287
ENSG00000254505	CHMP4A	PC	charged multivesicular body protein 4A	CHMP4A belongs to the chromatin-modifying protein/charged multivesicular body protein (CHMP) family. These proteins are components of ESCRT-III (endosomal sorting complex required for transport III), a complex involved in degradation of surface receptor proteins and formation of endocytic multivesicular bodies (MVBs). Some CHMPs have both nuclear and cytoplasmic/vesicular distributions, and one s…	hsa04144 (Endocytosis), hsa04217 (Necroptosis), GO:0000920 (cytokinetic cell separation), GO:0006620 (posttranslational protein targeting to membrane), GO:0006900 (membrane budding), GO:0006997 (nucleus organization), GO:0007034 (vacuolar transport), GO:0007080 (mitotic metaphase plate congression), GO:0010324 (membrane invagination), GO:0016197 (endosomal transport), GO:0016236 (macroautophagy),…			0.247364	-0.0874738		-0.00581078	-0.299108	-0.18427		0.321556	0.0928187	-0.0850753					12.0161	79.6577	11.6806	0.0687267	6.21171	0.151226	0.70435	0.864312	0.724426	0.235877	0.342764	0.277174	0.138411	0.506303	0.743775		87.2266	68.7454	72.8654	59.0928	64.1545	91.9352	78.1626	68.8631
ENSG00000148356	LRSAM1	PC	leucine rich repeat and sterile alpha motif containing 1	This gene encodes a ring finger protein involved in a variety of functions, including regulation of signaling pathways and cell adhesion, mediation of self-ubiquitylation, and involvement in cargo sorting during receptor endocytosis. Mutations in this gene have been associated with Charcot-Marie-Tooth disease. Multiple transcript variants encoding different isoforms have been identified for this …	GO:0000209 (protein polyubiquitination), GO:0006914 (autophagy), GO:0007165 (signal transduction), GO:0030163 (protein catabolic process), GO:0045806 (negative regulation of endocytosis), GO:0046755 (viral budding), GO:0051865 (protein autoubiquitination), GO:0070086 (ubiquitin-dependent endocytosis), GO:1904417 (NA), GO:2000786 (positive regulation of autophagic vacuole assembly), GO:0005737 (cy…			-0.332174	0.00665665		0.29007	0.34418	0.243373		-0.332174	-0.134217	-0.0857146					11.5723	38.7174	71.3719	-0.125645	3.76355	0.193104	0.668352	0.844592	0.683606	0.0782622	0.23887	-0.221803	-0.150826	0.597557	0.72146		10.0057	13.184	16.4801	17.1863	15.8915	10.0057	11.7715	12.2423
ENSG00000130766	SESN2	PC	sestrin 2	This gene encodes a member of the sestrin family of PA26-related proteins. The encoded protein may function in the regulation of cell growth and survival. This protein may be involved in cellular response to different stress conditions. [provided by RefSeq, Jul 2008]. Publication Note: This RefSeq record includes a subset of the publications that are available for this gene. Please see the Gene r…	hsa04115 (p53 signaling pathway), hsa04150 (mTOR signaling pathway), hsa04211 (Longevity regulating pathway), GO:0001932 (regulation of protein phosphorylation), GO:0006635 (fatty acid beta-oxidation), GO:0009749 (response to glucose), GO:0016239 (positive regulation of macroautophagy), GO:0030308 (negative regulation of cell growth), GO:0030330 (DNA damage response, signal transduction by p53 cl…			-0.135659	-0.253988		0.276564	0.188562	0.123602		-0.113114	-0.0909169	0.00494999					11.2458	41.2403	93.4715	0.080987	3.88491	0.130793	0.724058	0.874393	0.747422	0.0439369	0.23887	0.264575	0.148195	0.526586	0.726176		12.9486	11.7715	17.8926	16.7155	15.8915	13.184	13.4195	14.4789
ENSG00000136436	CALCOCO2	PC	calcium binding and coiled-coil domain 2	This gene encodes a coiled-coil domain-containing protein. The encoded protein functions as a receptor for ubiquitin-coated bacteria and plays an important role in innate immunity by mediating macroautophagy. Alternatively spliced transcript variants encoding multiple isoforms have been observed for this gene. [provided by RefSeq, May 2012].	hsa04137 (Mitophagy - animal), GO:0016032 (viral process), GO:0034341 (response to interferon-gamma), GO:0098792 (NA), GO:1901098 (positive regulation of autophagic vacuole maturation), GO:0000421 (autophagic vacuole membrane), GO:0005634 (nucleus), GO:0005737 (cytoplasm), GO:0005776 (autophagic vacuole), GO:0005829 (cytosol), GO:0005856 (cytoskeleton), GO:0016020 (membrane), GO:0031410 (cytoplas…			0.395808	-0.160674		-0.02572	-0.0517198	-0.02572		-0.105169	0.0249148	-0.0517198					11.1082	12.156	15.3419	-0.246992	2.31851	0.822058	0.382872	0.642998	0.407995	0.944679	0.957532	-0.0765092	-0.400603	0.857104	0.325363		6.82745	4.0023	4.59087	4.47316	4.59087	4.23773	4.8263	4.47316
ENSG00000068354	TBC1D25	PC	TBC1 domain family member 25	This gene encodes a protein with a TBC domain and may function as a Rab GTPase activating protein. This gene was previously known as ornithine aminotransferase-like 1, but has no similarity to ornithine aminotransferase. [provided by RefSeq, Jul 2008].	GO:0006886 (intracellular protein transport), GO:0006914 (autophagy), GO:0031338 (regulation of vesicle fusion), GO:0061024 (membrane organization), GO:0090630 (NA), GO:1901096 (regulation of autophagic vacuole maturation), GO:0005776 (autophagic vacuole), GO:0012505 (endomembrane system), GO:0031410 (cytoplasmic vesicle), GO:0005096 (GTPase activator activity), GO:0005515 (protein binding), GO:0…			0.0323265	-0.506901		0.0630265	0.179683	0.137034		-0.0149843	0.016728	0.0930868					10.8263	27.717	47.9753	0.25509	3.17546	0.986962	0.340588	0.603643	0.363028	0.133469	0.23887	0.0629941	0.431634	0.882198	0.285589		8.94632	5.53259	9.18175	10.1235	9.77032	8.59317	8.8286	9.41718
ENSG00000255330	AL096711.2	PC			GO:0010506 (regulation of autophagy), GO:0005615 (extracellular space), GO:0016021 (integral component of membrane)			0.272054	0.0359391		0.158821	-0.32672	-0.208044		0.0986882	-0.0983926	0.0676548					10.5861	3.22865	96.33	-0.168846	1.78373	0.268364	0.614086	0.81552	0.626705	0.485672	0.577441	-0.151186	-0.238474	0.720817	0.569525		4.23773	3.29601	3.76687	2.11886	2.47201	3.53144	2.82515	3.41373
ENSG00000126775	ATG14	PC	autophagy related 14		hsa04140 (Autophagy - animal), hsa05167 (Kaposi sarcoma-associated herpesvirus infection), GO:0000045 (autophagic vacuole assembly), GO:0000423 (macromitophagy), GO:0001932 (regulation of protein phosphorylation), GO:0001933 (negative regulation of protein phosphorylation), GO:0001934 (positive regulation of protein phosphorylation), GO:0008333 (endosome to lysosome transport), GO:0009267 (cellul…			-0.139746	-0.00782171		0.0336021	-0.0361135	0.0870462		0.534539	-0.28496	-0.186546					10.5532	32.1542	97.7856	0.163286	3.40522	0.352199	0.564167	0.782102	0.584556	0.573753	0.646528	-0.125988	0.205863	0.76626	0.624774		9.06403	10.1235	10.4766	9.88803	10.9475	15.6561	8.0046	8.71089
ENSG00000077254	USP33	PC	ubiquitin specific peptidase 33	This gene encodes a deubiquinating enzyme important in a variety of processes, including Slit-dependent cell migration and beta-2 adrenergic receptor signaling. The protein is negatively regulated through ubiquitination by von Hippel-Lindau tumor protein (VHL). Alternative splicing results in multiple transcript variants and protein isoforms. [provided by RefSeq, Jun 2012].	GO:0006511 (ubiquitin-dependent protein catabolic process), GO:0006897 (endocytosis), GO:0007411 (axon guidance), GO:0008277 (regulation of G-protein coupled receptor protein signaling pathway), GO:0009267 (cellular response to starvation), GO:0010506 (regulation of autophagy), GO:0016477 (cell migration), GO:0016579 (protein deubiquitination), GO:0032091 (negative regulation of protein binding),…			-0.671796	0.814934		-0.55889	-0.191124	-0.191124		0.311411	0.33665	0.149938					10.1833	41.9637	52.5717	0.0973157	3.92878	0.0588451	0.812531	0.920544	0.814507	0.320282	0.42701	0.342211	0.0795197	0.406689	0.851528		8.12231	26.3681	8.94632	12.1246	12.1246	18.0103	18.3635	15.8915
ENSG00000132612	VPS4A	PC	vacuolar protein sorting 4 homolog A	The protein encoded by this gene is a member of the AAA protein family (ATPases associated with diverse cellular activities), and is the homolog of the yeast Vps4 protein. In humans, two paralogs of the yeast protein have been identified. The former share a high degree of aa sequence similarity with each other, and also with yeast Vps4 and mouse Skd1 proteins. The mouse Skd1 (suppressor of K+ tra…	hsa04144 (Endocytosis), hsa04217 (Necroptosis), GO:0000920 (cytokinetic cell separation), GO:0006900 (membrane budding), GO:0006997 (nucleus organization), GO:0007033 (vacuole organization), GO:0007080 (mitotic metaphase plate congression), GO:0009838 (abscission), GO:0015031 (protein transport), GO:0016192 (vesicle-mediated transport), GO:0016197 (endosomal transport), GO:0016236 (macroautophagy…			-0.104158	0.0779116		0.259367	0.0325853	-0.0221605		-0.352101	-0.104158	0.212715					10.0473	49.259	69.7045	-0.0806534	4.32488	0.147794	0.707548	0.866613	0.731026	0.544476	0.635063	-0.196455	-0.155727	0.641016	0.712697		18.1281	20.8355	23.8961	20.1292	19.3052	14.9498	18.1281	23.0721
ENSG00000196998	WDR45	PC	WD repeat domain 45	This gene encodes a member of the WD repeat protein family. WD repeats are minimally conserved regions of approximately 40 amino acids typically bracketed by gly-his and trp-asp (GH-WD), which may facilitate formation of heterotrimeric or multiprotein complexes. Members of this family are involved in a variety of cellular processes, including cell cycle progression, signal transduction, apoptosis…	GO:0006914 (autophagy), R-HSA-1632852 (Homo sapiens: Macroautophagy), R-HSA-2262752 (Homo sapiens: Cellular responses to stress)			0.0110667	-0.117869		0.0552354	-0.093553	0.166806		0.0296349	-0.113788	0.0624671					9.83644	68.428	19.4971	0.0363977	5.44035	0.0700086	0.795927	0.911155	0.825401	0.362805	0.46944	0.289773	0.140223	0.486325	0.740508		43.4367	39.5521	44.8493	40.2584	48.6162	44.0253	39.6699	45.0847
ENSG00000160948	VPS28	PC	VPS28, ESCRT-I subunit	This gene encodes a protein subunit of the ESCRT-I complex (endosomal complexes required for transport), which functions in the transport and sorting of proteins into subcellular vesicles. This complex can also be hijacked to facilitate the budding of enveloped viruses from the cell membrane. Alternative splicing results in multiple transcript variants encoding different isoforms. [provided by Re…	hsa04144 (Endocytosis), GO:0016197 (endosomal transport), GO:0016236 (macroautophagy), GO:0019058 (viral life cycle), GO:0031397 (negative regulation of protein ubiquitination), GO:0036258 (multivesicular body assembly), GO:0039702 (viral budding via host ESCRT complex), GO:0043162 (ubiquitin-dependent protein catabolic process via the multivesicular body sorting pathway), GO:0043328 (protein tar…			-0.380303	-0.0419417		0.151804	0.275962	0.161659		-0.223857	0.00260507	0.0540717					9.73532	89.0349	36.0565	0.0957473	7.11564	0.274654	0.610011	0.812936	0.633533	0.0621765	0.23887	0.125988	0.173958	0.76626	0.68035		104.884	133.135	152.558	166.449	153.618	117.126	137.373	142.435
ENSG00000110497	AMBRA1	PC	autophagy and beclin 1 regulator 1		hsa04137 (Mitophagy - animal), hsa04140 (Autophagy - animal), GO:0000045 (autophagic vacuole assembly), GO:0000422 (mitochondrion degradation), GO:0000423 (macromitophagy), GO:0008285 (negative regulation of cell proliferation), GO:0009267 (cellular response to starvation), GO:0010508 (positive regulation of autophagy), GO:0010667 (negative regulation of cardiac muscle cell apoptotic process), GO…			-0.199038	-0.22584		0.316446	0.328777	0.0372095		-0.0801537	-0.0559048	-0.121497					9.68389	49.7354	82.9113	0.0647441	4.35631	0.0778364	0.785121	0.905928	0.800832	0.0439369	0.23887	0.264575	0.0986465	0.526586	0.816234		17.1863	16.8332	25.4264	25.6618	20.6001	18.8344	19.1875	18.2458
ENSG00000171109	MFN1	PC	mitofusin 1	The protein encoded by this gene is a mediator of mitochondrial fusion. This protein and mitofusin 2 are homologs of the Drosophila protein fuzzy onion (Fzo). They are mitochondrial membrane proteins that interact with each other to facilitate mitochondrial targeting. [provided by RefSeq, Jul 2008]. Publication Note: This RefSeq record includes a subset of the publications that are available for …	hsa04137 (Mitophagy - animal), hsa04621 (NOD-like receptor signaling pathway), GO:0008053 (mitochondrial fusion), GO:0016236 (macroautophagy), GO:0046039 (GTP metabolic process), GO:0051646 (mitochondrion localization), GO:1990613 (NA), GO:0005739 (mitochondrion), GO:0005741 (mitochondrial outer membrane), GO:0016021 (integral component of membrane), GO:0031306 (intrinsic component of mitochondri…			0.0270503	-0.0069009		0.170657	0.139957	-0.0069009		0.287313	-0.671396	0.0602209					9.20393	25.6793	65.8315	-0.103965	3.05802	0.109636	0.746413	0.885273	0.754216	0.681791	0.754175	0.196455	-0.136521	0.641016	0.747186		8.12231	7.88688	9.18175	8.94632	7.88688	10.1235	4.23773	8.35774
ENSG00000135018	UBQLN1	PC	ubiquilin 1	This gene encodes an ubiquitin-like protein (ubiquilin) that shares a high degree of similarity with related products in yeast, rat and frog. Ubiquilins contain an N-terminal ubiquitin-like domain and a C-terminal ubiquitin-associated domain. They physically associate with both proteasomes and ubiquitin ligases, and thus are thought to functionally link the ubiquitination machinery to the proteas…	hsa04141 (Protein processing in endoplasmic reticulum), GO:0000045 (autophagic vacuole assembly), GO:0016236 (macroautophagy), GO:0030433 (ER-associated ubiquitin-dependent protein catabolic process), GO:0031396 (regulation of protein ubiquitination), GO:0031398 (positive regulation of protein ubiquitination), GO:0034140 (negative regulation of toll-like receptor 3 signaling pathway), GO:0034976 …			0.0718576	0.129109		-0.246527	-0.215374	-0.0882375		0.208788	0.0543892	0.0859942					9.11235	84.7477	80.9263	0.0590586	6.66072	0.165189	0.691759	0.856837	0.720984	0.082085	0.23887	0.151186	0.160616	0.720817	0.703985		105.59	109.946	84.2837	86.1672	94.2895	116.302	104.295	106.65
ENSG00000175634	RPS6KB2	PC	ribosomal protein S6 kinase B2	This gene encodes a member of the RSK (ribosomal S6 kinase) family of serine/threonine kinases. This kinase contains 2 nonidentical kinase catalytic domains and phosphorylates the S6 ribosomal protein and eucaryotic translation initiation factor 4B (eIF4B). Phosphorylation of S6 leads to an increase in protein synthesis and cell proliferation. [provided by RefSeq, Jul 2008]. Publication Note: Thi…	hsa01521 (EGFR tyrosine kinase inhibitor resistance), hsa01522 (Endocrine resistance), hsa04012 (ErbB signaling pathway), hsa04066 (HIF-1 signaling pathway), hsa04140 (Autophagy - animal), hsa04150 (mTOR signaling pathway), hsa04151 (PI3K-Akt signaling pathway), hsa04152 (AMPK signaling pathway), hsa04211 (Longevity regulating pathway), hsa04213 (Longevity regulating pathway - multiple species), …			-0.246019	-0.0486403		0.153979	0.128039	0.14183		-0.149545	0.0143554	0.00600151					8.86582	84.5625	39.0913	0.0648934	6.63809	0.203705	0.659998	0.83971	0.69718	0.0621765	0.23887	0.125988	0.176873	0.76626	0.675214		83.1066	95.5843	110.299	108.298	109.357	88.9923	99.9398	99.3512
ENSG00000111276	CDKN1B	PC	cyclin dependent kinase inhibitor 1B	This gene encodes a cyclin-dependent kinase inhibitor, which shares a limited similarity with CDK inhibitor CDKN1A/p21. The encoded protein binds to and prevents the activation of cyclin E-CDK2 or cyclin D-CDK4 complexes, and thus controls the cell cycle progression at G1. The degradation of this protein, which is triggered by its CDK dependent phosphorylation and subsequent ubiquitination by SCF…	hsa01522 (Endocrine resistance), hsa04012 (ErbB signaling pathway), hsa04066 (HIF-1 signaling pathway), hsa04068 (FoxO signaling pathway), hsa04110 (Cell cycle), hsa04151 (PI3K-Akt signaling pathway), hsa04933 (AGE-RAGE signaling pathway in diabetic complications), hsa04934 (Cushing syndrome), hsa05161 (Hepatitis B), hsa05162 (Measles), hsa05165 (Human papillomavirus infection), hsa05169 (Epstein…			0.12019	0.600343		-0.307256	-0.487178	-0.378646		0.484419	0.0206491	-0.0525213					8.85645	49.3031	33.1098	-0.141109	4.32699	0.203006	0.66054	0.839826	0.667711	0.0621765	0.23887	-0.125988	-0.151856	0.76626	0.719618		20.9532	30.0172	15.0675	13.0663	14.2435	27.5452	19.4229	18.3635
ENSG00000176994	SMCR8	PC	Smith-Magenis syndrome chromosome region, candidate 8		GO:0006469 (negative regulation of protein kinase activity), GO:0010629 (negative regulation of gene expression), GO:0016242 (negative regulation of macroautophagy), GO:0032008 (positive regulation of TOR signaling), GO:0043547 (positive regulation of GTPase activity), GO:1901098 (positive regulation of autophagic vacuole maturation), GO:1902902 (negative regulation of autophagic vacuole assembly…			0.14086	-0.234454		0.234478	-0.0575648	0.116475		-0.104565	-0.153149	0.0579194					8.78219	45.7216	99.8412	-0.0597643	4.12525	0.0890538	0.770617	0.898551	0.792963	0.388896	0.486699	-0.201581	-0.133093	0.63215	0.753382		19.0698	14.2435	20.4824	16.3623	18.7166	15.7738	15.1852	17.8926
ENSG00000145016	RUBCN	PC	RUN and cysteine rich domain containing beclin 1 interacting protein	The protein encoded by this gene is a negative regulator of autophagy and endocytic trafficking and controls endosome maturation. This protein contains two conserved domains, an N-terminal RUN domain and a C-terminal DUF4206 domain. The RUN domain is involved in Ras-like GTPase signaling, and the DUF4206 domain contains a diacylglycerol (DAG) binding-like motif. Mutation in this gene results in d…	hsa04140 (Autophagy - animal), GO:0002376 (immune system process), GO:0006909 (phagocytosis), GO:0006914 (autophagy), GO:0010507 (negative regulation of autophagy), GO:0043553 (negative regulation of phosphatidylinositol 3-kinase activity), GO:0045806 (negative regulation of endocytosis), GO:0071985 (multivesicular body sorting pathway), GO:1901097 (negative regulation of autophagic vacuole matur…			0.512762	-0.121663		-0.0584606	-0.187762	-0.121663		0.0410885	0.0790612	-0.143362					8.73015	20.6863	75.6065	-0.261313	2.78988	0.892091	0.364008	0.624454	0.384613	0.459964	0.555821	-0.0443607	-0.351576	0.916933	0.393101		10.2412	5.88573	6.23888	5.53259	5.88573	6.82745	7.06288	5.76802
ENSG00000103510	KAT8	PC	lysine acetyltransferase 8	This gene encodes a member of the MYST histone acetylase protein family. The encoded protein has a characteristic MYST domain containing an acetyl-CoA-binding site, a chromodomain typical of proteins which bind histones, and a C2HC-type zinc finger. Multiple transcript variants encoding different isoforms have been found for this gene. [provided by RefSeq, Feb 2012].	GO:0006351 (transcription, DNA-templated), GO:0010506 (regulation of autophagy), GO:0016573 (histone acetylation), GO:0030099 (myeloid cell differentiation), GO:0043981 (histone H4-K5 acetylation), GO:0043982 (histone H4-K8 acetylation), GO:0043984 (histone H4-K16 acetylation), GO:0045892 (negative regulation of transcription, DNA-templated), GO:0045893 (positive regulation of transcription, DNA-…			0.0693497	-0.172908		0.0183969	0.144717	0.178866		-0.140964	0.0277959	-0.125254					8.57444	62.6588	54.8655	-0.0631205	5.08454	0.15591	0.700054	0.861062	0.734892	0.259961	0.361497	-0.138587	-0.179391	0.743457	0.670788		35.3144	29.5464	34.0195	37.3156	38.2573	30.2527	34.255	30.6058
ENSG00000168010	ATG16L2	PC	autophagy related 16 like 2		hsa04140 (Autophagy - animal), GO:0000045 (autophagic vacuole assembly), GO:0015031 (protein transport), GO:0039689 (negative stranded viral RNA replication), GO:0000421 (autophagic vacuole membrane), GO:0005654 (nucleoplasm)			-0.363053	0.379671		-0.126426	0.0768044	0.22671		-0.150881	-0.307014	0.264187					8.44543	39.1496	53.3745	-0.124824	3.78373	0.206438	0.657887	0.838899	0.673007	0.882497	0.91194	-0.113389	-0.162873	0.78921	0.699971		9.88803	17.8926	12.0069	14.1258	15.8915	11.7715	10.3589	16.3623
ENSG00000108389	MTMR4	PC	myotubularin related protein 4		hsa00562 (Inositol phosphate metabolism), hsa01100 (Metabolic pathways), hsa04070 (Phosphatidylinositol signaling system), hsa04140 (Autophagy - animal), GO:0006470 (protein dephosphorylation), GO:0006661 (phosphatidylinositol biosynthetic process), GO:0007179 (transforming growth factor beta receptor signaling pathway), GO:0014894 (response to denervation involved in regulation of muscle adaptat…			-0.257995	0.262869		-0.000180123	0.125358	-0.0627254		-0.0718859	0.0764456	-0.0718859					8.32058	46.1627	61.1557	-0.0553041	4.15058	0.0816409	0.780081	0.904285	0.80197	0.703698	0.767958	-0.190117	-0.13118	0.652027	0.756845		14.2435	21.3064	17.4218	19.1875	16.5978	16.4801	18.4812	16.4801
ENSG00000119541	VPS4B	PC	vacuolar protein sorting 4 homolog B	The protein encoded by this gene is a member of the AAA protein family (ATPases associated with diverse cellular activities), and is the homolog of the yeast Vps4 protein. In humans, two paralogs of the yeast protein have been identified. The former share a high degree of aa sequence similarity with each other, and also with yeast Vps4 and mouse Skd1 proteins. Mouse Skd1 (suppressor of K+ transpo…	hsa04144 (Endocytosis), hsa04217 (Necroptosis), GO:0000920 (cytokinetic cell separation), GO:0006813 (potassium ion transport), GO:0006997 (nucleus organization), GO:0007033 (vacuole organization), GO:0007080 (mitotic metaphase plate congression), GO:0010824 (regulation of centrosome duplication), GO:0010971 (positive regulation of G2/M transition of mitotic cell cycle), GO:0015031 (protein trans…			-0.406112	0.783836		-0.598789	-0.10229	-0.12067		0.476632	-0.10229	0.0696831					8.17359	26.6584	49.6515	-0.0928906	3.11549	0.050164	0.826641	0.92661	0.829253	0.302771	0.408014	0.240815	-0.0730686	0.565624	0.863483		5.53259	15.1852	4.59087	7.29831	7.1806	11.8892	7.29831	8.47546
ENSG00000034713	GABARAPL2	PC	GABA type A receptor associated protein like 2		hsa04068 (FoxO signaling pathway), hsa04136 (Autophagy - other), hsa04137 (Mitophagy - animal), hsa04140 (Autophagy - animal), hsa04371 (Apelin signaling pathway), hsa04621 (NOD-like receptor signaling pathway), hsa04727 (GABAergic synapse), hsa05167 (Kaposi sarcoma-associated herpesvirus infection), GO:0006891 (intra-Golgi vesicle-mediated transport), GO:0006914 (autophagy), GO:0015031 (protein …			-0.094649	0.199233		-0.0093547	-0.0768086	-0.094649		0.0039422	0.0206109	0.0516751					8.06004	92.3518	26.9696	-0.0192101	7.57414	0.029862	0.865757	0.943235	0.886369	0.277307	0.383453	0.310525	-0.0808787	0.454111	0.849012		177.749	218.361	188.697	179.986	177.749	190.462	192.699	196.937
ENSG00000117984	CTSD	PC	cathepsin D	This gene encodes a lysosomal aspartyl protease composed of a dimer of disulfide-linked heavy and light chains, both produced from a single protein precursor. This proteinase, which is a member of the peptidase C1 family, has a specificity similar to but narrower than that of pepsin A. Transcription of this gene is initiated from several sites, including one which is a start site for an estrogen-…	hsa04071 (Sphingolipid signaling pathway), hsa04140 (Autophagy - animal), hsa04142 (Lysosome), hsa04210 (Apoptosis), hsa04915 (Estrogen signaling pathway), hsa05152 (Tuberculosis), GO:0006508 (proteolysis), GO:0006914 (autophagy), GO:0019886 (antigen processing and presentation of exogenous peptide antigen via MHC class II), GO:0030163 (protein catabolic process), GO:0030574 (collagen catabolic p…			-0.542332	0.115577		0.247879	0.398483	0.281265		-0.23331	-0.12938	-0.138181					7.79688	95.5628	46.5461	-0.0781812	8.23233	0.0971275	0.760788	0.89372	0.767036	0.082085	0.23887	-0.151186	-0.0933677	0.720817	0.82595		201.528	319.125	349.966	388.694	358.206	250.144	268.978	267.33
ENSG00000096717	SIRT1	PC	sirtuin 1	This gene encodes a member of the sirtuin family of proteins, homologs to the yeast Sir2 protein. Members of the sirtuin family are characterized by a sirtuin core domain and grouped into four classes. The functions of human sirtuins have not yet been determined; however, yeast sirtuin proteins are known to regulate epigenetic gene silencing and suppress recombination of rDNA. Studies suggest tha…	hsa04068 (FoxO signaling pathway), hsa04152 (AMPK signaling pathway), hsa04211 (Longevity regulating pathway), hsa04213 (Longevity regulating pathway - multiple species), hsa04218 (Cellular senescence), hsa04922 (Glucagon signaling pathway), hsa05031 (Amphetamine addiction), hsa05206 (MicroRNAs in cancer), GO:0000012 (single strand break repair), GO:0000122 (negative regulation of transcription f…			0.0238195	0.527938		-0.331347	-0.172615	-0.331347		0.432348	0.0238195	-0.172615					7.67727	10.9651	85.3992	-0.169147	2.24876	0.197699	0.664698	0.841719	0.671712	0.084876	0.23887	-0.096225	-0.159301	0.820689	0.706325		4.47316	7.1806	3.06058	3.64916	3.06058	6.59202	4.47316	3.64916
ENSG00000153130	SCOC	PC	short coiled-coil protein	This gene encodes a short coiled-coiled domain-containing protein that localizes to the Golgi apparatus. The encoded protein interacts with ADP-ribosylation factor-like proteins. Pseudogenes of this gene are found on chromosomes 1 and 14. Alternative splicing results in multiple transcript variants. [provided by RefSeq, Apr 2009].	GO:0016239 (positive regulation of macroautophagy), GO:0061635 (regulation of protein complex stability), GO:0000139 (Golgi membrane), GO:0005654 (nucleoplasm), GO:0005768 (endosome), GO:0005794 (Golgi apparatus), GO:0005802 (trans-Golgi network), GO:0005829 (cytosol), GO:0005515 (protein binding), R-HSA-199991 (Homo sapiens: Membrane Trafficking), R-HSA-5653656 (Homo sapiens: Vesicle-mediated tr…			-0.398693	0.91848		-0.327128	-0.304041	-0.52647		0.601427	0.273342	-0.236916					7.625	24.5325	70.4191	-0.0834537	2.99817	0.0300092	0.86543	0.943235	0.866462	0.235877	0.342764	0.277174	-0.055106	0.506303	0.896885		4.94402	15.3029	5.29716	5.41488	4.35544	11.8892	9.06403	5.76802
ENSG00000131558	EXOC4	PC	exocyst complex component 4	The protein encoded by this gene is a component of the exocyst complex, a multiple protein complex essential for targeting exocytic vesicles to specific docking sites on the plasma membrane. Though best characterized in yeast, the component proteins and functions of exocyst complex have been demonstrated to be highly conserved in higher eukaryotes. At least eight components of the exocyst complex…	GO:0006612 (protein targeting to membrane), GO:0006887 (exocytosis), GO:0006893 (Golgi to plasma membrane transport), GO:0006903 (vesicle targeting), GO:0006904 (vesicle docking involved in exocytosis), GO:0007268 (synaptic transmission), GO:0016241 (regulation of macroautophagy), GO:0048341 (paraxial mesoderm formation), GO:0000145 (exocyst), GO:0005737 (cytoplasm), GO:0005829 (cytosol), GO:0005…			0.0972256	0.130779		-0.0267661	-0.212037	-0.0833511		0.195631	0.0938269	-0.195309					7.5422	69.3102	16.0124	-0.0492171	5.49927	0.100669	0.756619	0.891027	0.782219	0.208161	0.322233	-0.138587	-0.136176	0.743457	0.747809		48.0276	49.2047	43.9076	38.375	42.1419	51.559	47.9099	38.8458
ENSG00000113575	PPP2CA	PC	protein phosphatase 2 catalytic subunit alpha	This gene encodes the phosphatase 2A catalytic subunit. Protein phosphatase 2A is one of the four major Ser/Thr phosphatases, and it is implicated in the negative control of cell growth and division. It consists of a common heteromeric core enzyme, which is composed of a catalytic subunit and a constant regulatory subunit, that associates with a variety of regulatory subunits. This gene encodes a…	hsa03015 (mRNA surveillance pathway), hsa04071 (Sphingolipid signaling pathway), hsa04114 (Oocyte meiosis), hsa04136 (Autophagy - other), hsa04140 (Autophagy - animal), hsa04151 (PI3K-Akt signaling pathway), hsa04152 (AMPK signaling pathway), hsa04261 (Adrenergic signaling in cardiomyocytes), hsa04350 (TGF-beta signaling pathway), hsa04390 (Hippo signaling pathway), hsa04530 (Tight junction), hsa…			-0.057561	0.256139		-0.256136	-0.120764	-0.186863		0.205507	0.0985789	0.0610994					7.48913	20.5011	40.6617	0.0745364	2.78064	0.0843559	0.776562	0.902328	0.788957	0.082085	0.23887	0.151186	0.138708	0.720817	0.74324		6.23888	8.24003	5.17945	5.88573	5.53259	7.88688	7.1806	6.94517
ENSG00000163874	ZC3H12A	PC	zinc finger CCCH-type containing 12A	ZC3H12A is an MCP1 (CCL2; MIM 158105)-induced protein that acts as a transcriptional activator and causes cell death of cardiomyocytes, possibly via induction of genes associated with apoptosis.[supplied by OMIM, Mar 2008]. Publication Note: This RefSeq record includes a subset of the publications that are available for this gene. Please see the Gene record to access additional publications.	GO:0000294 (nuclear-transcribed mRNA catabolic process, endonucleolytic cleavage-dependent decay), GO:0001525 (angiogenesis), GO:0001933 (negative regulation of protein phosphorylation), GO:0002230 (positive regulation of defense response to virus by host), GO:0006351 (transcription, DNA-templated), GO:0006915 (apoptotic process), GO:0006954 (inflammatory response), GO:0006974 (cellular response …			0.0451178	-0.138357		-0.188118	0.0234195	0.245842		0.0875592	-0.163023	0.0875592					7.04691	16.8313	58.7825	0.059061	2.56442	0.0509664	0.825285	0.925731	0.837209	0.893642	0.913947	0.177443	0.118516	0.674212	0.779854		5.88573	4.94402	4.70859	5.76802	7.06288	6.12116	4.8263	6.12116
ENSG00000004142	POLDIP2	PC	DNA polymerase delta interacting protein 2	This gene encodes a protein that interacts with the DNA polymerase delta p50 subunit, as well as with proliferating cell nuclear antigen. The encoded protein maybe play a role in the ability of the replication fork to bypass DNA lesions. Alternative splicing results in multiple transcript variants. [provided by RefSeq, Feb 2014].	GO:0016242 (negative regulation of macroautophagy), GO:0045931 (positive regulation of mitotic cell cycle), GO:0070584 (mitochondrion morphogenesis), GO:0005634 (nucleus), GO:0005739 (mitochondrion), GO:0042645 (mitochondrial nucleoid), GO:0003677 (DNA binding), GO:0005515 (protein binding)			-0.183644	-0.0375233		0.122544	0.160482	0.0660501		-0.164204	0.00234676	0.033949					6.82171	88.7968	67.4283	0.0376987	7.09436	0.0837106	0.777393	0.902836	0.806153	0.0621765	0.23887	0.125988	0.120104	0.76626	0.776961		119.48	132.429	148.203	152.205	142.435	121.128	136.196	139.256
ENSG00000196730	DAPK1	PC	death associated protein kinase 1	Death-associated protein kinase 1 is a positive mediator of gamma-interferon induced programmed cell death. DAPK1 encodes a structurally unique 160-kD calmodulin dependent serine-threonine kinase that carries 8 ankyrin repeats and 2 putative P-loop consensus sites. It is a tumor suppressor candidate. Alternative splicing results in multiple transcript variants. [provided by RefSeq, Dec 2013].	hsa04140 (Autophagy - animal), hsa05200 (Pathways in cancer), hsa05219 (Bladder cancer), GO:0006468 (protein phosphorylation), GO:0006915 (apoptotic process), GO:0008625 (extrinsic apoptotic signaling pathway via death domain receptors), GO:0010506 (regulation of autophagy), GO:0010508 (positive regulation of autophagy), GO:0017148 (negative regulation of translation), GO:0035556 (intracellular s…			0.235363	-0.0735365		-0.0390076	-0.0735365	-0.048789		0.0507499	0.0323121	-0.0835555					6.70692	62.8176	83.2466	-0.0778464	5.09265	0.295679	0.596813	0.803452	0.647126	0.80706	0.848922	-0.0570352	-0.278988	0.893291	0.503408		40.1407	32.0184	32.8424	32.0184	32.607	35.079	34.6081	31.783
ENSG00000114867	EIF4G1	PC	eukaryotic translation initiation factor 4 gamma 1	The protein encoded by this gene is a component of the multi-subunit protein complex EIF4F. This complex facilitates the recruitment of mRNA to the ribosome, which is a rate-limiting step during the initiation phase of protein synthesis. The recognition of the mRNA cap and the ATP-dependent unwinding of 5_-terminal secondary structure is catalyzed by factors in this complex. The subunit encoded b…	hsa03013 (RNA transport), hsa05416 (Viral myocarditis), GO:0000184 (nuclear-transcribed mRNA catabolic process, nonsense-mediated decay), GO:0000289 (nuclear-transcribed mRNA poly(A) tail shortening), GO:0001662 (behavioral fear response), GO:0002191 (cap-dependent translational initiation), GO:0006412 (translation), GO:0006413 (translational initiation), GO:0006446 (regulation of translational i…			-0.23803	-0.129297		0.13394	0.225788	0.264088		-0.193043	-0.0113536	-0.0520914					6.15318	95.651	85.5845	0.0400825	8.26396	0.0579693	0.813902	0.921257	0.828648	0.0621765	0.23887	0.125988	0.0787766	0.76626	0.852904		258.148	278.513	334.663	356.793	366.446	266.388	302.409	293.934
ENSG00000149639	SOGA1	PC	suppressor of glucose, autophagy associated 1		GO:0008286 (insulin receptor signaling pathway), GO:0010506 (regulation of autophagy), GO:0045721 (negative regulation of gluconeogenesis), GO:0005615 (extracellular space), GO:0070062 (extracellular vesicular exosome), GO:0003674 (molecular_function)			0.0757796	-0.229191		0.151486	0.0624475	0.00785181		0.0470584	0.0586156	-0.174048					5.9618	81.819	99.0825	0.0313883	6.38428	0.0517135	0.824033	0.925534	0.846143	0.573753	0.646528	-0.125988	0.0978591	0.76626	0.817682		87.5797	70.5111	92.406	86.7557	83.4597	85.814	86.5203	73.3363
ENSG00000126581	BECN1	PC	beclin 1	Beclin-1 participates in the regulation of autophagy and has an important role in development, tumorigenesis, and neurodegeneration (Zhong et al., 2009 [PubMed 19270693]).[supplied by OMIM, Jul 2010]. Publication Note: This RefSeq record includes a subset of the publications that are available for this gene. Please see the Gene record to access additional publications.	hsa04136 (Autophagy - other), hsa04137 (Mitophagy - animal), hsa04140 (Autophagy - animal), hsa04215 (Apoptosis - multiple species), hsa04371 (Apelin signaling pathway), hsa05167 (Kaposi sarcoma-associated herpesvirus infection), GO:0000045 (autophagic vacuole assembly), GO:0000422 (mitochondrion degradation), GO:0000423 (macromitophagy), GO:0000910 (cytokinesis), GO:0001666 (response to hypoxia)…			-0.0210095	0.887394		-0.418909	-0.324576	-0.270801		0.242037	0.0995864	-0.193721					5.87645	52.1965	28.3194	-0.401678	4.49268	1.56547	0.235305	0.49971	0.231092	0.0765781	0.23887	0.0125988	-0.358585	0.97638	0.383065		20.9532	41.0824	15.4206	16.5978	17.3041	25.5441	22.9544	18.3635
ENSG00000103657	HERC1	PC	HECT and RLD domain containing E3 ubiquitin protein ligase family member 1	This gen encodes a member of the HERC protein family. This protein stimulates guanine nucleotide exchange on ARF1 and Rab proteins. This protein may be involved in membrane transport processes. [provided by RefSeq, Mar 2012].	hsa04120 (Ubiquitin mediated proteolysis), GO:0006810 (transport), GO:0010507 (negative regulation of autophagy), GO:0016567 (protein ubiquitination), GO:0021702 (cerebellar Purkinje cell differentiation), GO:0031175 (neuron projection development), GO:0043547 (positive regulation of GTPase activity), GO:0050885 (neuromuscular process controlling balance), GO:0005737 (cytoplasm), GO:0005794 (Golg…			-0.204165	0.0328893		0.259037	0.101199	0.0241186		-0.0480356	-0.153536	-0.0115075					5.81139	45.4658	65.8227	-0.0257692	4.11304	0.0175674	0.896808	0.957451	0.908114	0.149154	0.252534	-0.21418	-0.0622121	0.610525	0.883653		14.4789	17.4218	20.7178	18.3635	17.3041	16.3623	15.0675	16.8332
ENSG00000101421	CHMP4B	PC	charged multivesicular body protein 4B	This gene encodes a member of the chromatin-modifying protein/charged multivesicular body protein (CHMP) protein family. The protein is part of the endosomal sorting complex required for transport (ESCRT) complex III (ESCRT-III), which functions in the sorting of endocytosed cell-surface receptors into multivesicular endosomes. The ESCRT machinery also functions in the final abscisson stage of cy…	hsa04144 (Endocytosis), hsa04217 (Necroptosis), GO:0000281 (mitotic cytokinesis), GO:0000920 (cytokinetic cell separation), GO:0006620 (posttranslational protein targeting to membrane), GO:0006914 (autophagy), GO:0006997 (nucleus organization), GO:0007034 (vacuolar transport), GO:0007080 (mitotic metaphase plate congression), GO:0010458 (exit from mitosis), GO:0010824 (regulation of centrosome du…			-0.0964706	0.110048		-0.0776761	0.0821688	0.0173981		-0.0208276	-0.0265076	0.011867					5.74004	91.8754	60.9528	-0.0239142	7.49821	0.0545548	0.819355	0.923378	0.851405	0.882497	0.91194	-0.113389	-0.137166	0.78921	0.746021		168.567	194.818	170.804	191.051	182.575	177.749	177.043	181.869
ENSG00000143553	SNAPIN	PC	SNAP associated protein	The protein encoded by this gene is a coiled-coil-forming protein that associates with the SNARE (soluble N-ethylmaleimide-sensitive fusion protein attachment protein receptor) complex of proteins and the BLOC-1 (biogenesis of lysosome-related organelles) complex. Biochemical studies have identified additional binding partners. As part of the SNARE complex, it is required for vesicle docking and …	GO:0006886 (intracellular protein transport), GO:0007042 (lysosomal lumen acidification), GO:0007269 (neurotransmitter secretion), GO:0008089 (anterograde axon cargo transport), GO:0008090 (retrograde axon cargo transport), GO:0008333 (endosome to lysosome transport), GO:0010977 (negative regulation of neuron projection development), GO:0016032 (viral process), GO:0016079 (synaptic vesicle exocyt…			0.0608066	0.0383805		-0.0036618	-0.127081	-0.114462		0.188501	-0.0133902	-0.0290934					5.59698	82.2865	20.5382	0.022376	6.43005	0.0344672	0.855896	0.939259	0.877521	0.208161	0.322233	-0.138587	0.0919234	0.743457	0.828612		89.5809	88.1683	85.5786	78.398	79.1043	98.0563	84.99	84.0483
ENSG00000164073	MFSD8	PC	major facilitator superfamily domain containing 8	This gene encodes a ubiquitous integral membrane protein that contains a transporter domain and a major facilitator superfamily (MFS) domain. Other members of the major facilitator superfamily transport small solutes through chemiosmotic ion gradients. The substrate transported by this protein is unknown. The protein likely localizes to lysosomal membranes. Mutations in this gene are correlated w…	hsa04142 (Lysosome), GO:0007040 (lysosome organization), GO:0010506 (regulation of autophagy), GO:0048666 (neuron development), GO:0055085 (transmembrane transport), GO:0005654 (nucleoplasm), GO:0005765 (lysosomal membrane), GO:0016021 (integral component of membrane), GO:0043231 (intracellular membrane-bounded organelle)			-0.283708	0.0542024		0.11627	0.175777	0.00583406		-0.168216	-0.0612878	0.161129					5.58794	26.4908	60.2647	0.0770284	3.10566	0.101781	0.755326	0.890616	0.774067	0.367879	0.469732	0.0755929	0.157555	0.858802	0.709437		6.47431	8.71089	9.18175	9.65261	8.35774	7.1806	7.88688	9.53489
ENSG00000103197	TSC2	PC	TSC complex subunit 2	Mutations in this gene lead to tuberous sclerosis complex. Its gene product is believed to be a tumor suppressor and is able to stimulate specific GTPases. The protein associates with hamartin in a cytosolic complex, possibly acting as a chaperone for hamartin. Alternative splicing results in multiple transcript variants encoding different isoforms. [provided by RefSeq, Jul 2008].	hsa04072 (Phospholipase D signaling pathway), hsa04115 (p53 signaling pathway), hsa04140 (Autophagy - animal), hsa04150 (mTOR signaling pathway), hsa04151 (PI3K-Akt signaling pathway), hsa04152 (AMPK signaling pathway), hsa04211 (Longevity regulating pathway), hsa04218 (Cellular senescence), hsa04714 (Thermogenesis), hsa04910 (Insulin signaling pathway), hsa04919 (Thyroid hormone signaling pathwa…			-0.168246	-0.0368823		0.105985	0.233931	0.123714		-0.17365	-0.000417368	-0.084435					5.55344	78.3522	77.0534	-0.025664	6.11518	0.0284917	0.868841	0.944494	0.883921	0.082085	0.23887	-0.151186	-0.0663466	0.720817	0.875965		60.9762	66.9797	74.1603	81.2231	75.102	60.7408	68.7454	64.7431
ENSG00000175224	ATG13	PC	autophagy related 13		hsa04136 (Autophagy - other), hsa04140 (Autophagy - animal), hsa04211 (Longevity regulating pathway), GO:0000045 (autophagic vacuole assembly), GO:0000423 (macromitophagy), GO:0016236 (macroautophagy), GO:0098780 (NA), GO:1903955 (NA), GO:0000407 (pre-autophagosomal structure), GO:0005739 (mitochondrion), GO:0005789 (endoplasmic reticulum membrane), GO:0005829 (cytosol), GO:1990316 (ATG1/UKL1 kin…			-0.108849	-0.159875		0.214204	-0.00153206	0.191766		0.168973	-0.0119116	-0.292775					5.47907	60.6387	35.1037	0.0682249	4.97	0.130118	0.724738	0.874585	0.748959	0.133469	0.23887	0.0629941	0.13996	0.882198	0.740982		28.487	27.4275	36.1384	30.8413	35.5498	34.9613	30.6058	24.8378
ENSG00000260914	AC026464.4	PC			hsa04144 (Endocytosis), hsa04217 (Necroptosis), GO:0000920 (cytokinetic cell separation), GO:0006900 (membrane budding), GO:0006997 (nucleus organization), GO:0007033 (vacuole organization), GO:0007080 (mitotic metaphase plate congression), GO:0009838 (abscission), GO:0015031 (protein transport), GO:0016192 (vesicle-mediated transport), GO:0016197 (endosomal transport), GO:0016236 (macroautophagy…			-0.233472	0.0315252		0.101182	0.170174	0.025917		-0.175789	-0.0549768	0.13544					5.45599	86.9531	41.4557	0.0433422	6.87644	0.0936565	0.764956	0.896368	0.791384	0.367879	0.469732	0.0755929	0.120149	0.858802	0.776879		98.9981	119.363	125.366	131.605	118.892	103.118	112.3	128.427
ENSG00000276293	PIP4K2B	PC	phosphatidylinositol-5-phosphate 4-kinase type 2 beta	The protein encoded by this gene catalyzes the phosphorylation of phosphatidylinositol-5-phosphate on the fourth hydroxyl of the myo-inositol ring to form phosphatidylinositol-5,4-bisphosphate. This gene is a member of the phosphatidylinositol-5-phosphate 4-kinase family. The encoded protein sequence does not show similarity to other kinases, but the protein does exhibit kinase activity. Addition…	hsa00562 (Inositol phosphate metabolism), hsa01100 (Metabolic pathways), hsa04070 (Phosphatidylinositol signaling system), hsa04810 (Regulation of actin cytoskeleton), GO:0006644 (phospholipid metabolic process), GO:0006661 (phosphatidylinositol biosynthetic process), GO:0007166 (cell surface receptor signaling pathway), GO:0010506 (regulation of autophagy), GO:0014066 (regulation of phosphatidyl…			0.0807779	-0.111413		0.168054	-0.115088	0.0678675		-0.0931731	-0.00869653	0.0116717					5.43461	70.9068	71.0719	-0.0286882	5.5946	0.0447243	0.836151	0.930643	0.85995	0.882497	0.91194	-0.113389	-0.109226	0.78921	0.796825		50.8527	44.2607	54.1488	44.143	50.3819	44.8493	47.6745	48.3807
ENSG00000100150	DEPDC5	PC	DEP domain containing 5	This gene encodes a member of the IML1 family of proteins involved in G-protein signaling pathways. The mechanistic target of rapamycin complex 1 (mTORC1) pathway regulates cell growth by sensing the availability of nutrients. The protein encoded by this gene is a component of the GATOR1 (GAP activity toward Rags) complex which inhibits the amino acid-sensing branch of the mTORC1 pathway. Mutatio…	hsa04150 (mTOR signaling pathway), GO:0010506 (regulation of autophagy), GO:0032007 (negative regulation of TOR signaling), GO:0034198 (cellular response to amino acid starvation), GO:0035556 (intracellular signal transduction), GO:0043547 (positive regulation of GTPase activity), GO:1904262 (NA), GO:0005764 (lysosome), GO:0005765 (lysosomal membrane), GO:0005829 (cytosol), GO:0048471 (perinuclea…			-0.223748	-0.103429		0.183503	0.318875	0.297177		0.159652	-0.132582	-0.499447					5.43384	10.5681	77.9621	-0.0637313	2.2217	0.0262695	0.874009	0.946882	0.876275	0.082085	0.23887	-0.151186	-0.0597167	0.720817	0.888297		3.41373	3.88458	5.17945	5.88573	5.76802	5.06173	3.76687	2.47201
ENSG00000197548	ATG7	PC	autophagy related 7	This gene was identified based on homology to Pichia pastoris GSA7 and Saccharomyces cerevisiae APG7. In the yeast, the protein appears to be required for fusion of peroxisomal and vacuolar membranes. The protein shows homology to the ATP-binding and catalytic sites of the E1 ubiquitin activating enzymes. [provided by RefSeq, Jan 2009].	hsa04136 (Autophagy - other), hsa04140 (Autophagy - animal), hsa04216 (Ferroptosis), GO:0000422 (mitochondrion degradation), GO:0006464 (cellular protein modification process), GO:0006497 (protein lipidation), GO:0006914 (autophagy), GO:0007568 (aging), GO:0009267 (cellular response to starvation), GO:0009749 (response to glucose), GO:0010508 (positive regulation of autophagy), GO:0015031 (protei…			-0.201126	0.0683558		0.100067	0.191221	0.035932		-0.150496	0.0576286	-0.101582					5.35164	38.4174	18.9502	-0.0343442	3.74942	0.0291886	0.867263	0.944021	0.881385	0.259961	0.361497	-0.138587	-0.0889162	0.743457	0.834159		11.1829	13.8903	14.2435	15.3029	13.5372	11.6538	13.7726	12.1246
ENSG00000089289	IGBP1	PC	immunoglobulin binding protein 1	The proliferation and differentiation of B cells is dependent upon a B-cell antigen receptor (BCR) complex. Binding of antigens to specific B-cell receptors results in a tyrosine phosphorylation reaction through the BCR complex and leads to multiple signal transduction pathways. [provided by RefSeq, Jul 2008]. Publication Note: This RefSeq record includes a subset of the publications that are ava…	hsa04136 (Autophagy - other), hsa04140 (Autophagy - animal), GO:0000122 (negative regulation of transcription from RNA polymerase II promoter), GO:0007165 (signal transduction), GO:0032873 (negative regulation of stress-activated MAPK cascade), GO:0034612 (response to tumor necrosis factor), GO:0042113 (B cell activation), GO:0043154 (negative regulation of cysteine-type endopeptidase activity in…			0.0321272	-0.0677306		0.0543918	-0.0919786	0.0499663		-0.0701371	-0.00883598	0.102197					5.30101	79.102	65.3375	0.0256825	6.17663	0.0506182	0.825872	0.926206	0.856095	0.945959	0.957532	0.100791	0.147202	0.812294	0.727958		73.6894	68.6277	74.8665	67.4505	74.6311	68.51	71.5705	77.4563
ENSG00000103148	NPRL3	PC	NPR3 like, GATOR1 complex subunit	The function of the encoded protein is not known. [provided by RefSeq, Aug 2011].	hsa04150 (mTOR signaling pathway), GO:0003281 (ventricular septum development), GO:0008150 (biological_process), GO:0032007 (negative regulation of TOR signaling), GO:0034198 (cellular response to amino acid starvation), GO:0035909 (aorta morphogenesis), GO:0038202 (TORC1 signaling), GO:0043547 (positive regulation of GTPase activity), GO:0048738 (cardiac muscle tissue development), GO:0060021 (p…			-0.2307	0.00747832		0.0282383	0.193587	0.265293		-0.0786846	-0.182197	-0.0030148					4.69776	40.6845	62.6378	-0.0267366	3.85735	0.015176	0.904047	0.961651	0.913053	0.082085	0.23887	-0.151186	-0.0534078	0.720817	0.900051		11.7715	14.2435	14.4789	16.4801	17.4218	13.3018	12.2423	14.1258
ENSG00000189298	ZKSCAN3	PC	zinc finger with KRAB and SCAN domains 3		GO:0000122 (negative regulation of transcription from RNA polymerase II promoter), GO:0006351 (transcription, DNA-templated), GO:0006914 (autophagy), GO:0007040 (lysosome organization), GO:0010507 (negative regulation of autophagy), GO:0045892 (negative regulation of transcription, DNA-templated), GO:0045893 (positive regulation of transcription, DNA-templated), GO:2000773 (negative regulation of…			-0.119885	-0.409449		0.228093	0.327642	0.288643		0.121162	-0.119885	-0.31632					4.66724	14.1584	95.0772	0.111505	2.42907	0.0887742	0.770966	0.898773	0.776782	0.0679996	0.23887	0.0570352	0.107472	0.893291	0.800037		4.47316	3.29601	6.23888	6.82745	6.59202	5.65031	4.47316	3.64916
ENSG00000112561	TFEB	PC	transcription factor EB		hsa04137 (Mitophagy - animal), GO:0001892 (embryonic placenta development), GO:0002250 (adaptive immune response), GO:0006351 (transcription, DNA-templated), GO:0006355 (regulation of transcription, DNA-templated), GO:0006914 (autophagy), GO:0006959 (humoral immune response), GO:0007040 (lysosome organization), GO:0010508 (positive regulation of autophagy), GO:0045944 (positive regulation of tran…			-0.25009	-0.033225		0.095127	0.212987	0.347941		-0.137586	-0.330282	0.095127					4.59554	3.46683	43.6171	-0.0589105	1.79601	0.0237703	0.880098	0.949267	0.883669	0.110049	0.23887	-0.11407	-0.0600106	0.787966	0.88775		2.35429	3.06058	3.53144	4.0023	4.59087	2.70744	2.11886	3.53144
ENSG00000085978	ATG16L1	PC	autophagy related 16 like 1	The protein encoded by this gene is part of a large protein complex that is necessary for autophagy, the major process by which intracellular components are targeted to lysosomes for degradation. Defects in this gene are a cause of susceptibility to inflammatory bowel disease type 10 (IBD10). Several transcript variants encoding different isoforms have been found for this gene.[provided by RefSeq…	hsa04136 (Autophagy - other), hsa04140 (Autophagy - animal), hsa04621 (NOD-like receptor signaling pathway), GO:0000045 (autophagic vacuole assembly), GO:0015031 (protein transport), GO:0016236 (macroautophagy), GO:0039689 (negative stranded viral RNA replication), GO:0051260 (protein homooligomerization), GO:0000421 (autophagic vacuole membrane), GO:0005776 (autophagic vacuole), GO:0005829 (cyto…			0.126713	-0.130905		-0.0881525	-0.109371	0.153681		-0.026309	-0.00626984	0.0806133					4.59361	42.2724	68.9193	0.0182566	3.94679	0.0103788	0.92058	0.96959	0.930186	0.894839	0.913947	0.176383	0.0614205	0.676076	0.885126		16.7155	13.6549	14.1258	13.8903	17.0686	14.8321	15.0675	16.1269
ENSG00000141564	RPTOR	PC	regulatory associated protein of MTOR complex 1	This gene encodes a component of a signaling pathway that regulates cell growth in response to nutrient and insulin levels. The encoded protein forms a stoichiometric complex with the mTOR kinase, and also associates with eukaryotic initiation factor 4E-binding protein-1 and ribosomal protein S6 kinase. The protein positively regulates the downstream effector ribosomal protein S6 kinase, and nega…	hsa04136 (Autophagy - other), hsa04140 (Autophagy - animal), hsa04150 (mTOR signaling pathway), hsa04151 (PI3K-Akt signaling pathway), hsa04152 (AMPK signaling pathway), hsa04211 (Longevity regulating pathway), hsa04213 (Longevity regulating pathway - multiple species), hsa04714 (Thermogenesis), hsa04910 (Insulin signaling pathway), hsa05206 (MicroRNAs in cancer), GO:0001938 (positive regulation …			-0.0613476	-0.144178		-0.111755	0.234349	0.198598		-0.170651	-0.0307147	0.0856994					4.54871	56.8631	85.9109	0.0398995	4.75493	0.0489523	0.828711	0.927371	0.846884	0.367879	0.469732	0.0755929	0.0931007	0.858802	0.826442		25.4264	23.8961	24.4847	31.6653	30.8413	23.4252	26.0149	28.3692
ENSG00000143882	ATP6V1C2	PC	ATPase H+ transporting V1 subunit C2	This gene encodes a component of vacuolar ATPase (V-ATPase), a multisubunit enzyme that mediates acidification of eukaryotic intracellular organelles. V-ATPase dependent organelle acidification is necessary for such intracellular processes as protein sorting, zymogen activation, receptor-mediated endocytosis, and synaptic vesicle proton gradient generation. V-ATPase is composed of a cytosolic V1 …	hsa00190 (Oxidative phosphorylation), hsa01100 (Metabolic pathways), hsa04145 (Phagosome), hsa04150 (mTOR signaling pathway), hsa04721 (Synaptic vesicle cycle), hsa04966 (Collecting duct acid secretion), hsa05110 (Vibrio cholerae infection), hsa05120 (Epithelial cell signaling in Helicobacter pylori infection), hsa05165 (Human papillomavirus infection), hsa05323 (Rheumatoid arthritis), GO:0008286…			-0.53304	-0.0808161		0.1875	0.196768	0.327679		-0.101494	-0.110992	0.114395					4.45059	83.9361	61.288	0.192946	6.58314	0.795095	0.390533	0.649132	0.407713	0.0765781	0.23887	-0.0125988	0.279835	0.97638	0.502058		64.5077	88.9923	107.591	108.298	118.774	87.6974	87.1089	102.176
ENSG00000061337	LZTS1	PC	leucine zipper tumor suppressor 1	This gene encodes a tumor suppressor protein that is ubiquitously expressed in normal tissues. In uveal melanomas, expression of this protein is silenced in rapidly metastasizing and metastatic tumor cells but has normal expression in slowly metastasizing or nonmetastasizing tumor cells. This protein may have a role in cell-cycle control by interacting with the Cdk1/cyclinB1 complex. This gene is…	GO:0006351 (transcription, DNA-templated), GO:0006355 (regulation of transcription, DNA-templated), GO:0016242 (negative regulation of macroautophagy), GO:0044772 (mitotic cell cycle phase transition), GO:0048167 (regulation of synaptic plasticity), GO:0048814 (regulation of dendrite morphogenesis), GO:0005737 (cytoplasm), GO:0014069 (postsynaptic density), GO:0016324 (apical plasma membrane), GO…			-0.168598	-0.32733		0.672834	0.333988	0.0793757		-0.0256126	-0.168598	-0.396059					4.15672	11.0356	92.2541	-0.0818374	2.25322	0.0300001	0.86545	0.943235	0.865518	0.0782622	0.23887	-0.0823842	-0.0513716	0.846227	0.903848		3.64916	3.06058	8.12231	6.00345	4.70859	4.23773	3.64916	2.82515
ENSG00000133706	LARS	PC	leucyl-tRNA synthetase	This gene encodes a cytosolic leucine-tRNA synthetase, a member of the class I aminoacyl-tRNA synthetase family. The encoded enzyme catalyzes the ATP-dependent ligation of L-leucine to tRNA(Leu). It is found in the cytoplasm as part of a multisynthetase complex and interacts with the arginine tRNA synthetase through its C-terminal domain. Alternatively spliced transcript variants of this gene hav…	hsa00970 (Aminoacyl-tRNA biosynthesis), GO:0006418 (tRNA aminoacylation for protein translation), GO:0006429 (leucyl-tRNA aminoacylation), GO:0006438 (valyl-tRNA aminoacylation), GO:0006450 (regulation of translational fidelity), GO:0006622 (protein targeting to lysosome), GO:0008361 (regulation of cell size), GO:0010507 (negative regulation of autophagy), GO:0034198 (cellular response to amino a…			0.130121	0.124856		-0.0909603	-0.204016	-0.0681682		-0.0681682	0.012451	0.163885					4.08577	86.8737	46.4138	-0.0601562	6.86738	0.222322	0.645946	0.831907	0.687731	0.0997368	0.23887	-0.025349	-0.200349	0.952491	0.634278		127.25	126.779	108.886	100.528	110.652	110.652	117.126	130.31
ENSG00000127774	EMC6	PC	ER membrane protein complex subunit 6		GO:0000045 (autophagic vacuole assembly), GO:0034975 (protein folding in endoplasmic reticulum), GO:0016021 (integral component of membrane), GO:0030176 (integral component of endoplasmic reticulum membrane), GO:0072546 (ER membrane protein complex), GO:0097631 (integral component of omegasome membrane), GO:0005515 (protein binding)			-0.0814515	0.0805551		-0.0483792	-0.000150301	0.0272562		0.0824227	-0.0220553	-0.0381977					4.03923	81.9337	9.65152	0.00858017	6.39643	0.00632149	0.937972	0.976387	0.949462	0.894839	0.913947	0.176383	0.0584459	0.676076	0.890663		79.222	88.8746	81.1054	83.9306	85.5786	88.9923	82.6357	81.694
ENSG00000095787	WAC	PC	WW domain containing adaptor with coiled-coil	The protein encoded by this gene contains a WW domain, which is a protein module found in a wide range of signaling proteins. This domain mediates protein-protein interactions and binds proteins containing short linear peptide motifs that are proline-rich or contain at least one proline. This gene product shares 94% sequence identity with the WAC protein in mouse, however, its exact function is n…	GO:0006351 (transcription, DNA-templated), GO:0006974 (cellular response to DNA damage stimulus), GO:0010390 (histone monoubiquitination), GO:0016239 (positive regulation of macroautophagy), GO:0016567 (protein ubiquitination), GO:0032435 (negative regulation of proteasomal ubiquitin-dependent protein catabolic process), GO:0044783 (G1 DNA damage checkpoint), GO:0045893 (positive regulation of tr…			0.232381	0.086854		-0.214809	-0.292348	-0.177549		0.253755	0.156597	-0.0448799					4.03312	69.5219	64.614	0.016922	5.51328	0.00846403	0.928254	0.972432	0.933658	0.082085	0.23887	0.151186	0.0350415	0.720817	0.934351		53.207	47.9099	38.4927	36.3738	39.5521	54.031	50.3819	43.5544
ENSG00000189403	HMGB1	PC	high mobility group box 1		hsa03410 (Base excision repair), hsa04140 (Autophagy - animal), hsa04217 (Necroptosis), GO:0000122 (negative regulation of transcription from RNA polymerase II promoter), GO:0001773 (myeloid dendritic cell activation), GO:0002218 (activation of innate immune response), GO:0002224 (toll-like receptor signaling pathway), GO:0002407 (dendritic cell chemotaxis), GO:0002437 (inflammatory response to a…			0.233676	-0.114108		0.0598595	-0.191763	-0.16514		0.0664416	0.0240011	0.0870323					3.94774	97.3977	76.0653	0.0124328	8.87513	0.00921578	0.925146	0.970803	0.9337	0.259961	0.361497	0.138587	0.0369198	0.743457	0.930838		549.728	431.542	487.103	408.823	416.475	489.34	475.097	496.403
ENSG00000198925	ATG9A	PC	autophagy related 9A		hsa04136 (Autophagy - other), hsa04137 (Mitophagy - animal), hsa04140 (Autophagy - animal), GO:0000045 (autophagic vacuole assembly), GO:0000422 (mitochondrion degradation), GO:0015031 (protein transport), GO:0031667 (response to nutrient levels), GO:0034497 (protein localization to pre-autophagosomal structure), GO:0034727 (piecemeal microautophagy of nucleus), GO:0044805 (late nucleophagy), GO:…			-0.0777928	-0.131565		0.242734	0.09448	0.0142187		-0.0813159	0.0240892	-0.0848477					3.72541	71.3391	53.2775	0.026677	5.6246	0.0328706	0.859233	0.940997	0.877648	0.133469	0.23887	0.0629941	0.079728	0.882198	0.851142		46.2619	44.4962	58.2688	52.383	49.4402	46.1442	49.7933	46.0264
ENSG00000143322	ABL2	PC	ABL proto-oncogene 2, non-receptor tyrosine kinase	This gene encodes a member of the Abelson family of nonreceptor tyrosine protein kinases. The protein is highly similar to the c-abl oncogene 1 protein, including the tyrosine kinase, SH2 and SH3 domains, and it plays a role in cytoskeletal rearrangements through its C-terminal F-actin- and microtubule-binding sequences. This gene is expressed in both normal and tumor cells, and is involved in tr…	hsa04012 (ErbB signaling pathway), hsa04014 (Ras signaling pathway), hsa05416 (Viral myocarditis), GO:0006464 (cellular protein modification process), GO:0007155 (cell adhesion), GO:0007165 (signal transduction), GO:0007169 (transmembrane receptor protein tyrosine kinase signaling pathway), GO:0007204 (positive regulation of cytosolic calcium ion concentration), GO:0010506 (regulation of autophag…			-0.00993012	-0.00628225		-0.0772199	0.047357	0.0990733		-0.0695864	0.109198	-0.0926092					3.66323	69.2131	95.2625	-0.0129137	5.49551	0.0101658	0.921396	0.969818	0.934236	0.882497	0.91194	-0.113389	-0.0645234	0.78921	0.879354		44.4962	44.6139	42.3773	46.3796	48.1453	42.6127	48.4985	41.9064
ENSG00000175104	TRAF6	PC	TNF receptor associated factor 6	The protein encoded by this gene is a member of the TNF receptor associated factor (TRAF) protein family. TRAF proteins are associated with, and mediate signal transduction from, members of the TNF receptor superfamily. This protein mediates signaling from members of the TNF receptor superfamily as well as the Toll/IL-1 family. Signals from receptors such as CD40, TNFSF11/RANCE and IL-1 have been…	hsa04010 (MAPK signaling pathway), hsa04064 (NF-kappa B signaling pathway), hsa04120 (Ubiquitin mediated proteolysis), hsa04140 (Autophagy - animal), hsa04144 (Endocytosis), hsa04380 (Osteoclast differentiation), hsa04620 (Toll-like receptor signaling pathway), hsa04621 (NOD-like receptor signaling pathway), hsa04622 (RIG-I-like receptor signaling pathway), hsa04657 (IL-17 signaling pathway), hsa…			0.162238	0.23531		-0.0384868	-0.349739	-0.323262		-0.0822147	0.434642	-0.0384868					3.33459	18.8779	85.3198	-0.0292929	2.69144	0.00878104	0.926927	0.971401	0.929758	0.165432	0.273971	-0.101396	-0.0372357	0.811182	0.930248		7.06288	7.53374	5.88573	4.35544	4.47316	5.65031	8.94632	5.88573
ENSG00000196455	PIK3R4	PC	phosphoinositide-3-kinase regulatory subunit 4		hsa04136 (Autophagy - other), hsa04140 (Autophagy - animal), hsa04371 (Apelin signaling pathway), GO:0006468 (protein phosphorylation), GO:0006623 (protein targeting to vacuole), GO:0006661 (phosphatidylinositol biosynthetic process), GO:0016236 (macroautophagy), GO:0030242 (peroxisome degradation), GO:0032465 (regulation of cytokinesis), GO:0032801 (receptor catabolic process), GO:0034162 (toll-…			-0.0339146	0.0516096		0.0411923	-0.00124603	0.0516096		0.122498	0.0411923	-0.272941					3.21326	39.82	37.1416	-0.0482008	3.81423	0.0663054	0.801267	0.914182	0.823305	0.982373	0.987078	0.0318788	-0.155869	0.940268	0.712445		13.4195	14.3612	14.2435	13.7726	14.3612	15.1852	14.2435	11.0652
ENSG00000110719	TCIRG1	PC	T cell immune regulator 1, ATPase H+ transporting V0 subunit a3	Through alternate splicing, this gene encodes two proteins with similarity to subunits of the vacuolar ATPase (V-ATPase) but the encoded proteins seem to have different functions. V-ATPase is a multisubunit enzyme that mediates acidification of eukaryotic intracellular organelles. V-ATPase dependent organelle acidification is necessary for such intracellular processes as protein sorting, zymogen …	hsa00190 (Oxidative phosphorylation), hsa01100 (Metabolic pathways), hsa04142 (Lysosome), hsa04145 (Phagosome), hsa04721 (Synaptic vesicle cycle), hsa04966 (Collecting duct acid secretion), hsa05110 (Vibrio cholerae infection), hsa05120 (Epithelial cell signaling in Helicobacter pylori infection), hsa05152 (Tuberculosis), hsa05165 (Human papillomavirus infection), hsa05323 (Rheumatoid arthritis),…			-0.413543	-0.0509642		0.0899012	0.261071	0.283248		-0.110759	0.0842984	-0.143254					3.13065	73.9326	26.899	0.109957	5.80553	0.289432	0.600668	0.805374	0.623509	0.0765781	0.23887	-0.0125988	0.180487	0.97638	0.668864		40.847	53.0893	58.7396	66.3911	67.4505	50.8527	58.5042	49.6756
ENSG00000139719	VPS33A	PC	VPS33A, CORVET/HOPS core subunit	Vesicle mediated protein sorting plays an important role in segregation of intracellular molecules into distinct organelles. Genetic studies in yeast have identified more than 40 vacuolar protein sorting (VPS) genes involved in vesicle transport to vacuoles. This gene is a member of the Sec-1 domain family, and it encodes a protein similar to the yeast class C Vps33 protein. The mammalian class C…	GO:0006904 (vesicle docking involved in exocytosis), GO:0008333 (endosome to lysosome transport), GO:0015031 (protein transport), GO:0016192 (vesicle-mediated transport), GO:0030220 (platelet formation), GO:0032400 (melanosome localization), GO:0032418 (lysosome localization), GO:0035751 (regulation of lysosomal lumen pH), GO:0048070 (regulation of developmental pigmentation), GO:0097352 (autopha…			0.117551	-0.0286876		-0.0480555	-0.280262	0.0279031		0.250321	0.0092851	-0.0480555					3.02758	22.0095	52.8716	0.0678233	2.86465	0.0806347	0.781402	0.904671	0.796485	0.481464	0.577441	0.025349	0.151974	0.952491	0.719406		7.76917	6.82745	6.70974	5.41488	7.1806	8.71089	7.06288	6.70974
[truncated: 33 more rows]

## Sheet: AMPK pathway
Gene ID	Gene	Biotype	Name	RefSeq_Summary	Annotation			Control			5 μg/ml				50 μg/ml				0	0.5	1	Score	LogCPM rank (%)	Tr.Length rank (%)	LogFC	LogCPM	F	p (QLF test)	FDR (QLF test)	p (LR test)	p (Krusk-W.)	FDR (Krusk-W.)	Spear- man r	Pearson r	p (Spearman)	p (Pearson)	CPMs:	4848k1	4848k3	4446b1	4446b2	4446b3	4848a1	4848a2	4848a3
Abysil overview								0	0		1	1	1		2	2	2																					0	0	1	1	1	2	2	2
Hi vs Low								-0.25	-0.25		0	0	0		1	1	1																							0	0	0	1	1	1
Hi vs Cnt								0	0		-0.25	-0.25	-0.25		1	1	1																					0	0				1	1	1
[truncated: 82 more rows]

## Sheet: mTOR pathway
	Supplementary Table 9. Differential expression of genes participating AMPK, mTOR pathways, and genes involved in mitophagy and autophagy.
[truncated: 105 more rows]
