# Supplementary material for: Effects of Siberian fir terpenes extract Abisil on antioxidant activity, autophagy, transcriptome and proteome of human fibroblasts
Source: Aging (Albany NY). 2021 Aug 24;13(16):20050–80. doi: 10.18632/aging.203448 (PMC8436938; doi:10.18632/aging.203448)
Supplement: Supplementary Table 10 [file aging-13-203448-s011.xlsx]

## Sheet: source data
Supplementary Table 10. The detailed results of proteome profiling of MRC5-SV40 cells treated with Abisil (50 µg/ml) compared to the non-treated cells.
new_1, new_2, old_1, old_2, old_3, old_4 - technical relicates
H - gel fractionation
Protein IDs	Majority protein IDs	Peptide counts (all)	Peptide counts (razor+unique)	Peptide counts (unique)	Protein names	Gene names	Fasta headers	Number of proteins	Peptides	Razor + unique peptides	Unique peptides	Peptides	Peptides	Peptides	Peptides	Peptides	Peptides	Peptides	Peptides	Peptides	Peptides	Peptides	Peptides	Peptides	Peptides	Peptides	Peptides	Razor + unique peptides	Razor + unique peptides	Razor + unique peptides	Razor + unique peptides	Razor + unique peptides	Razor + unique peptides	Razor + unique peptides	Razor + unique peptides	Razor + unique peptides	Razor + unique peptides	Razor + unique peptides	Razor + unique peptides	Razor + unique peptides	Razor + unique peptides	Razor + unique peptides	Razor + unique peptides	Unique peptides	Unique peptides	Unique peptides	Unique peptides	Unique peptides	Unique peptides
									Total	Total	Total	Control old_3	Control old_4	Control new_1	Control new_2	Control old_1	Control old_2	Treated old_3	Treated old_4	Treated new_1	Treated new_2	Treated old_1	Treated old_2	Control H old_1	Control H old_2	Treated H old_1	Treated H old_2	Control old_3	Control old_4	Control new_1	Control new_2	Control old_1	Control old_2	Treated old_3	Treated old_4	Treated new_1	Treated new_2	Treated old_1	Treated old_2	Control H old_1	Control H old_2	Treated H old_1	Treated H old_2	Control old_3	Control old_4	Control new_1	Control new_2	Control old_1	Control old_2
A0AVT1	A0AVT1	8	8	8	Ubiquitin-like modifier-activating enzyme 6	UBA6	sp|A0AVT1|UBA6_HUMAN Ubiquitin-like modifier-activating enzyme 6 OS=Homo sapiens GN=UBA6 PE=1 SV=1	1	8	8	8	2	1	1	1	2	1	6	4	3	3	0	2	2	3	1	0	2	1	1	1	2	1	6	4	3	3	0	2	2	3	1	0	2	1	1	1	2	1
A0FGR8	A0FGR8	7	7	7	Extended synaptotagmin-2	ESYT2	sp|A0FGR8|ESYT2_HUMAN Extended synaptotagmin-2 OS=Homo sapiens GN=ESYT2 PE=1 SV=1	1	7	7	7	4	4	4	3	3	1	4	4	3	2	2	1	2	3	3	2	4	4	4	3	3	1	4	4	3	2	2	1	2	3	3	2	4	4	4	3	3	1
A0JLT2	A0JLT2	3	3	3	Mediator of RNA polymerase II transcription subunit 19	MED19	sp|A0JLT2|MED19_HUMAN Mediator of RNA polymerase II transcription subunit 19 OS=Homo sapiens GN=MED19 PE=1 SV=2	1	3	3	3	2	1	2	2	0	0	2	1	2	1	0	0	1	0	0	0	2	1	2	2	0	0	2	1	2	1	0	0	1	0	0	0	2	1	2	2	0	0
A0JNW5	A0JNW5	1	1	1	UHRF1-binding protein 1-like	UHRF1BP1L	sp|A0JNW5|UH1BL_HUMAN UHRF1-binding protein 1-like OS=Homo sapiens GN=UHRF1BP1L PE=1 SV=2	1	1	1	1	0	0	0	0	0	0	0	0	1	0	0	0	0	0	0	0	0	0	0	0	0	0	0	0	1	0	0	0	0	0	0	0	0	0	0	0	0	0
A1A4S6	A1A4S6	3	3	3	Rho GTPase-activating protein 10	ARHGAP10	sp|A1A4S6|RHG10_HUMAN Rho GTPase-activating protein 10 OS=Homo sapiens GN=ARHGAP10 PE=1 SV=1	1	3	3	3	1	0	0	1	0	0	0	0	0	2	0	0	0	1	0	0	1	0	0	1	0	0	0	0	0	2	0	0	0	1	0	0	1	0	0	1	0	0
A1L0T0	A1L0T0	8	8	8	Acetolactate synthase-like protein	ILVBL	sp|A1L0T0|ILVBL_HUMAN Acetolactate synthase-like protein OS=Homo sapiens GN=ILVBL PE=1 SV=2	1	8	8	8	2	3	2	3	2	0	3	4	3	2	1	3	4	6	5	0	2	3	2	3	2	0	3	4	3	2	1	3	4	6	5	0	2	3	2	3	2	0
A1X283	A1X283	1	1	1	SH3 and PX domain-containing protein 2B	SH3PXD2B	sp|A1X283|SPD2B_HUMAN SH3 and PX domain-containing protein 2B OS=Homo sapiens GN=SH3PXD2B PE=1 SV=3	1	1	1	1	0	0	0	0	0	0	0	0	1	1	0	0	0	0	0	0	0	0	0	0	0	0	0	0	1	1	0	0	0	0	0	0	0	0	0	0	0	0
A2RRP1	A2RRP1	8	8	8	Neuroblastoma-amplified sequence	NBAS	sp|A2RRP1|NBAS_HUMAN Neuroblastoma-amplified sequence OS=Homo sapiens GN=NBAS PE=1 SV=2	1	8	8	8	1	4	2	1	2	2	1	0	2	2	1	0	1	1	4	1	1	4	2	1	2	2	1	0	2	2	1	0	1	1	4	1	1	4	2	1	2	2
A2RU67	A2RU67	3	3	3	Uncharacterized protein KIAA1467	KIAA1467	sp|A2RU67|K1467_HUMAN Uncharacterized protein KIAA1467 OS=Homo sapiens GN=KIAA1467 PE=1 SV=1	1	3	3	3	0	0	0	2	1	2	1	0	0	1	1	0	1	1	0	0	0	0	0	2	1	2	1	0	0	1	1	0	1	1	0	0	0	0	0	2	1	2
A3KMH1	A3KMH1	3	3	3	von Willebrand factor A domain-containing protein 8	VWA8	sp|A3KMH1|VWA8_HUMAN von Willebrand factor A domain-containing protein 8 OS=Homo sapiens GN=VWA8 PE=1 SV=2	1	3	3	3	0	1	1	0	0	0	2	1	0	1	0	0	0	0	0	0	0	1	1	0	0	0	2	1	0	1	0	0	0	0	0	0	0	1	1	0	0	0
A3KN83	A3KN83	4	4	4	Protein strawberry notch homolog 1	SBNO1	sp|A3KN83|SBNO1_HUMAN Protein strawberry notch homolog 1 OS=Homo sapiens GN=SBNO1 PE=1 SV=1	1	4	4	4	0	0	0	1	0	0	1	0	2	1	0	0	1	1	0	0	0	0	0	1	0	0	1	0	2	1	0	0	1	1	0	0	0	0	0	1	0	0
A5D8V6	A5D8V6	2	2	2	Vacuolar protein sorting-associated protein 37C	VPS37C	sp|A5D8V6|VP37C_HUMAN Vacuolar protein sorting-associated protein 37C OS=Homo sapiens GN=VPS37C PE=1 SV=2	1	2	2	2	1	1	2	1	0	0	2	2	1	2	0	0	0	0	0	0	1	1	2	1	0	0	2	2	1	2	0	0	0	0	0	0	1	1	2	1	0	0
A5PLN9	A5PLN9	2	2	2	Trafficking protein particle complex subunit 13	TRAPPC13	sp|A5PLN9|TPC13_HUMAN Trafficking protein particle complex subunit 13 OS=Homo sapiens GN=TRAPPC13 PE=1 SV=2	1	2	2	2	2	2	0	0	0	0	0	0	0	0	0	0	0	0	0	0	2	2	0	0	0	0	0	0	0	0	0	0	0	0	0	0	2	2	0	0	0	0
A5YKK6	A5YKK6	6	6	6	CCR4-NOT transcription complex subunit 1	CNOT1	sp|A5YKK6|CNOT1_HUMAN CCR4-NOT transcription complex subunit 1 OS=Homo sapiens GN=CNOT1 PE=1 SV=2	1	6	6	6	1	1	2	3	1	1	4	2	3	2	1	0	2	3	0	0	1	1	2	3	1	1	4	2	3	2	1	0	2	3	0	0	1	1	2	3	1	1
A6NDG6	A6NDG6	5	5	5	Phosphoglycolate phosphatase	PGP	sp|A6NDG6|PGP_HUMAN Phosphoglycolate phosphatase OS=Homo sapiens GN=PGP PE=1 SV=1	1	5	5	5	2	2	1	1	1	1	2	1	2	3	0	0	1	3	1	0	2	2	1	1	1	1	2	1	2	3	0	0	1	3	1	0	2	2	1	1	1	1
A6NDU8	A6NDU8	2	2	2	UPF0600 protein C5orf51	C5orf51	sp|A6NDU8|CE051_HUMAN UPF0600 protein C5orf51 OS=Homo sapiens GN=C5orf51 PE=1 SV=1	1	2	2	2	1	1	1	1	0	1	1	0	1	1	0	1	1	0	1	0	1	1	1	1	0	1	1	0	1	1	0	1	1	0	1	0	1	1	1	1	0	1
A6NHR9	A6NHR9	13	13	13	Structural maintenance of chromosomes flexible hinge domain-containing protein 1	SMCHD1	sp|A6NHR9|SMHD1_HUMAN Structural maintenance of chromosomes flexible hinge domain-containing protein 1 OS=Homo sapiens GN=SMCHD1 PE=1 SV=2	1	13	13	13	4	5	3	3	1	1	6	3	5	6	2	1	6	3	3	0	4	5	3	3	1	1	6	3	5	6	2	1	6	3	3	0	4	5	3	3	1	1
A6NIH7	A6NIH7	1	1	1	Protein unc-119 homolog B	UNC119B	sp|A6NIH7|U119B_HUMAN Protein unc-119 homolog B OS=Homo sapiens GN=UNC119B PE=1 SV=1	1	1	1	1	0	0	0	0	0	0	1	0	0	1	0	0	0	0	0	0	0	0	0	0	0	0	1	0	0	1	0	0	0	0	0	0	0	0	0	0	0	0
A8MPP1;Q92771;Q96FC9	A8MPP1;Q92771;Q96FC9	1;1;1	1;1;1	1;1;1	Putative ATP-dependent RNA helicase DDX11-like protein 8;Putative ATP-dependent RNA helicase DDX12;Probable ATP-dependent RNA helicase DDX11	DDX11L8;DDX12P;DDX11	sp|A8MPP1|D11L8_HUMAN Putative ATP-dependent RNA helicase DDX11-like protein 8 OS=Homo sapiens GN=DDX11L8 PE=1 SV=1;sp|Q92771|DDX12_HUMAN Putative ATP-dependent RNA helicase DDX12 OS=Homo sapiens GN=DDX12P PE=5 SV=3;sp|Q96FC9|DDX11_HUMAN Probable ATP-depen	3	1	1	1	0	0	0	0	0	0	0	0	1	1	0	0	0	0	0	0	0	0	0	0	0	0	0	0	1	1	0	0	0	0	0	0	0	0	0	0	0	0
A8MUU1;Q01469	A8MUU1;Q01469	1;1	1;1	1;1	Putative fatty acid-binding protein 5-like protein 3;Fatty acid-binding protein, epidermal	FABP5P3;FABP5	sp|A8MUU1|FB5L3_HUMAN Putative fatty acid-binding protein 5-like protein 3 OS=Homo sapiens GN=FABP5P3 PE=5 SV=1;sp|Q01469|FABP5_HUMAN Fatty acid-binding protein, epidermal OS=Homo sapiens GN=FABP5 PE=1 SV=3	2	1	1	1	1	1	1	1	0	0	1	1	1	1	0	0	0	1	0	1	1	1	1	1	0	0	1	1	1	1	0	0	0	1	0	1	1	1	1	1	0	0
A9UHW6	A9UHW6	1	1	1	MIF4G domain-containing protein	MIF4GD	sp|A9UHW6|MI4GD_HUMAN MIF4G domain-containing protein OS=Homo sapiens GN=MIF4GD PE=1 SV=1	1	1	1	1	0	0	0	0	0	0	0	1	0	0	0	0	0	0	0	0	0	0	0	0	0	0	0	1	0	0	0	0	0	0	0	0	0	0	0	0	0	0
B4DYI2;P0DKV0	B4DYI2;P0DKV0	1;1	1;1	1;1	Spermatogenesis-associated protein 31C2;Spermatogenesis-associated protein 31C1	SPATA31C2;SPATA31C1	sp|B4DYI2|S31C2_HUMAN Spermatogenesis-associated protein 31C2 OS=Homo sapiens GN=SPATA31C2 PE=2 SV=2;sp|P0DKV0|S31C1_HUMAN Spermatogenesis-associated protein 31C1 OS=Homo sapiens GN=SPATA31C1 PE=2 SV=1	2	1	1	1	0	0	0	1	0	0	0	0	0	0	0	0	0	0	1	0	0	0	0	1	0	0	0	0	0	0	0	0	0	0	1	0	0	0	0	1	0	0
P0CG08;B7ZAQ6	P0CG08;B7ZAQ6	1;1	1;1	1;1	Golgi pH regulator B;Golgi pH regulator A	GPR89B;GPR89A	sp|P0CG08|GPHRB_HUMAN Golgi pH regulator B OS=Homo sapiens GN=GPR89B PE=1 SV=1;sp|B7ZAQ6|GPHRA_HUMAN Golgi pH regulator A OS=Homo sapiens GN=GPR89A PE=1 SV=2	2	1	1	1	0	0	0	0	1	1	0	0	0	0	0	1	1	0	1	0	0	0	0	0	1	1	0	0	0	0	0	1	1	0	1	0	0	0	0	0	1	1
CON__ENSEMBL:ENSBTAP00000006074	CON__ENSEMBL:ENSBTAP00000006074	3	3	3				1	3	3	3	0	0	0	3	1	1	1	0	1	0	0	0	0	0	0	0	0	0	0	3	1	1	1	0	1	0	0	0	0	0	0	0	0	0	0	3	1	1
CON__ENSEMBL:ENSBTAP00000007350;CON__P01030	CON__ENSEMBL:ENSBTAP00000007350;CON__P01030	16;10	16;10	16;10				2	16	16	16	11	11	9	12	7	7	8	8	10	10	3	5	10	8	3	1	11	11	9	12	7	7	8	8	10	10	3	5	10	8	3	1	11	11	9	12	7	7
CON__ENSEMBL:ENSBTAP00000011227	CON__ENSEMBL:ENSBTAP00000011227	2	2	2				1	2	2	2	0	1	1	1	1	1	2	0	1	1	0	0	0	0	0	0	0	1	1	1	1	1	2	0	1	1	0	0	0	0	0	0	0	1	1	1	1	1
CON__ENSEMBL:ENSBTAP00000013050	CON__ENSEMBL:ENSBTAP00000013050	1	1	1				1	1	1	1	1	1	1	0	0	1	1	0	1	0	0	1	1	1	0	0	1	1	1	0	0	1	1	0	1	0	0	1	1	1	0	0	1	1	1	0	0	1
CON__ENSEMBL:ENSBTAP00000016046;P23142	CON__ENSEMBL:ENSBTAP00000016046	9;2	9;2	9;2				2	9	9	9	6	6	9	8	4	6	7	5	8	5	6	3	5	3	3	0	6	6	9	8	4	6	7	5	8	5	6	3	5	3	3	0	6	6	9	8	4	6
CON__ENSEMBL:ENSBTAP00000018574	CON__ENSEMBL:ENSBTAP00000018574	3	3	3				1	3	3	3	2	1	2	1	2	2	2	2	2	2	2	2	2	1	2	0	2	1	2	1	2	2	2	2	2	2	2	2	2	1	2	0	2	1	2	1	2	2
CON__ENSEMBL:ENSBTAP00000024146	CON__ENSEMBL:ENSBTAP00000024146	26	26	26				1	26	26	26	12	16	13	10	10	10	16	17	13	14	4	5	8	12	6	7	12	16	13	10	10	10	16	17	13	14	4	5	8	12	6	7	12	16	13	10	10	10
CON__ENSEMBL:ENSBTAP00000024462	CON__ENSEMBL:ENSBTAP00000024462	3	1	1				1	3	1	1	2	2	3	3	2	2	3	2	3	1	1	1	1	1	0	0	0	0	1	1	0	0	1	0	1	0	0	0	0	0	0	0	0	0	1	1	0	0
CON__ENSEMBL:ENSBTAP00000024466	CON__ENSEMBL:ENSBTAP00000024466	4	4	2				1	4	4	2	3	3	3	4	3	2	3	4	3	3	1	1	2	2	0	0	3	3	3	4	3	2	3	4	3	3	1	1	2	2	0	0	1	1	1	2	1	0
CON__ENSEMBL:ENSBTAP00000025008	CON__ENSEMBL:ENSBTAP00000025008	3	3	3				1	3	3	3	1	1	1	1	1	1	1	1	3	1	1	1	1	0	1	0	1	1	1	1	1	1	1	1	3	1	1	1	1	0	1	0	1	1	1	1	1	1
CON__ENSEMBL:ENSBTAP00000031900	CON__ENSEMBL:ENSBTAP00000031900	2	2	2				1	2	2	2	0	0	0	0	1	1	0	1	0	0	0	0	0	0	0	0	0	0	0	0	1	1	0	1	0	0	0	0	0	0	0	0	0	0	0	0	1	1
CON__ENSEMBL:ENSBTAP00000032840	CON__ENSEMBL:ENSBTAP00000032840	3	3	3				1	3	3	3	0	0	0	0	0	0	0	3	0	0	0	0	0	1	0	1	0	0	0	0	0	0	0	3	0	0	0	0	0	1	0	1	0	0	0	0	0	0
CON__ENSEMBL:ENSBTAP00000033053	CON__ENSEMBL:ENSBTAP00000033053	1	1	1				1	1	1	1	1	1	1	0	0	1	1	1	1	0	0	0	1	1	1	0	1	1	1	0	0	1	1	1	1	0	0	0	1	1	1	0	1	1	1	0	0	1
CON__ENSEMBL:ENSBTAP00000037665	CON__ENSEMBL:ENSBTAP00000037665	4	4	4				1	4	4	4	2	1	0	1	2	1	2	3	1	1	0	2	1	2	0	0	2	1	0	1	2	1	2	3	1	1	0	2	1	2	0	0	2	1	0	1	2	1
CON__ENSEMBL:ENSP00000377550;CON__P13646-1;CON__Q99456;P13646;Q99456	CON__ENSEMBL:ENSP00000377550;CON__P13646-1;CON__Q99456;P13646;Q99456	1;1;1;1;1	1;1;1;1;1	1;1;1;1;1	Keratin, type I cytoskeletal 13;Keratin, type I cytoskeletal 12	KRT13;KRT12	sp|P13646|K1C13_HUMAN Keratin, type I cytoskeletal 13 OS=Homo sapiens GN=KRT13 PE=1 SV=4;sp|Q99456|K1C12_HUMAN Keratin, type I cytoskeletal 12 OS=Homo sapiens GN=KRT12 PE=1 SV=1	5	1	1	1	0	0	0	0	0	1	0	0	0	0	0	0	0	0	0	0	0	0	0	0	0	1	0	0	0	0	0	0	0	0	0	0	0	0	0	0	0	1
CON__P00735;P00734	CON__P00735	12;2	12;2	12;2				2	12	12	12	5	5	6	6	7	7	6	5	7	5	4	2	3	4	3	1	5	5	6	6	7	7	6	5	7	5	4	2	3	4	3	1	5	5	6	6	7	7
CON__P00761	CON__P00761	3	3	3				1	3	3	3	3	2	0	0	0	0	2	2	0	0	0	0	0	0	0	0	3	2	0	0	0	0	2	2	0	0	0	0	0	0	0	0	3	2	0	0	0	0
CON__P00978	CON__P00978	3	3	3				1	3	3	3	1	2	3	3	2	2	2	3	3	3	1	1	1	1	1	0	1	2	3	3	2	2	2	3	3	3	1	1	1	1	1	0	1	2	3	3	2	2
CON__P01045-1	CON__P01045-1	4	2	1				1	4	2	1	1	2	2	2	0	2	3	2	2	2	0	1	1	1	0	0	1	1	1	1	0	2	1	0	1	1	0	1	0	0	0	0	0	0	0	0	0	1
CON__P01966	CON__P01966	4	4	4				1	4	4	4	0	3	3	1	0	0	3	2	3	3	0	0	3	2	1	3	0	3	3	1	0	0	3	2	3	3	0	0	3	2	1	3	0	3	3	1	0	0
CON__P02070	CON__P02070	1	1	1				1	1	1	1	1	1	0	0	1	1	0	1	0	0	0	0	1	1	0	0	1	1	0	0	1	1	0	1	0	0	0	0	1	1	0	0	1	1	0	0	1	1
CON__P02533;P02533;CON__Q61782;CON__Q6IFX2	CON__P02533;P02533;CON__Q61782;CON__Q6IFX2	2;2;1;1	2;2;1;1	2;2;1;1	Keratin, type I cytoskeletal 14	KRT14	sp|P02533|K1C14_HUMAN Keratin, type I cytoskeletal 14 OS=Homo sapiens GN=KRT14 PE=1 SV=4;	4	2	2	2	0	1	1	1	2	2	1	0	0	0	1	2	2	1	2	1	0	1	1	1	2	2	1	0	0	0	1	2	2	1	2	1	0	1	1	1	2	2
CON__P02662	CON__P02662	1	1	1				1	1	1	1	0	0	0	0	0	0	0	0	0	0	0	1	1	1	1	1	0	0	0	0	0	0	0	0	0	0	0	1	1	1	1	1	0	0	0	0	0	0
CON__P02666	CON__P02666	1	1	1				1	1	1	1	0	0	1	1	0	0	0	0	0	0	0	0	1	1	1	1	0	0	1	1	0	0	0	0	0	0	0	0	1	1	1	1	0	0	1	1	0	0
CON__P02672	CON__P02672	2	2	2				1	2	2	2	2	2	2	1	0	1	2	1	1	1	0	0	2	1	1	0	2	2	2	1	0	1	2	1	1	1	0	0	2	1	1	0	2	2	2	1	0	1
CON__P02676	CON__P02676	5	5	5				1	5	5	5	2	3	1	2	2	0	2	3	2	2	1	1	2	1	3	0	2	3	1	2	2	0	2	3	2	2	1	1	2	1	3	0	2	3	1	2	2	0
CON__P02768-1;P02768	CON__P02768-1;P02768	4;4	2;2	2;2	Serum albumin	ALB	sp|P02768|ALBU_HUMAN Serum albumin OS=Homo sapiens GN=ALB PE=1 SV=2	2	4	2	2	1	1	2	2	1	1	2	1	3	1	1	1	1	1	0	0	0	0	1	1	0	0	1	1	2	1	0	0	0	0	0	0	0	0	1	1	0	0
CON__P02769	CON__P02769	24	24	22				1	24	24	22	7	8	12	12	12	12	17	9	13	11	6	4	9	8	7	0	7	8	12	12	12	12	17	9	13	11	6	4	9	8	7	0	6	7	11	11	11	11
CON__P04258	CON__P04258	2	2	2				1	2	2	2	0	1	2	2	1	1	2	0	2	2	0	0	1	0	0	0	0	1	2	2	1	1	2	0	2	2	0	0	1	0	0	0	0	1	2	2	1	1
CON__P04264;P04264;CON__ENSEMBL:ENSBTAP00000038253;CON__Q9R0H5;CON__Q6NXH9;CON__Q8BGZ7;CON__P50446;CON__Q6IFZ6;CON__Q7Z794;CON__Q922U2;CON__Q5XQN5;Q7Z794	CON__P04264;P04264	12;12;2;1;1;1;1;1;1;1;1;1	12;12;2;1;1;1;1;1;1;1;1;1	11;11;1;0;0;1;1;0;0;1;1;0	Keratin, type II cytoskeletal 1	KRT1	sp|P04264|K2C1_HUMAN Keratin, type II cytoskeletal 1 OS=Homo sapiens GN=KRT1 PE=1 SV=6	12	12	12	11	4	3	3	3	8	10	3	2	4	4	6	7	8	6	5	4	4	3	3	3	8	10	3	2	4	4	6	7	8	6	5	4	4	3	3	3	7	9
CON__P05784	CON__P05784	1	1	1				1	1	1	1	0	1	1	0	0	0	1	0	1	1	0	0	1	0	0	1	0	1	1	0	0	0	1	0	1	1	0	0	1	0	0	1	0	1	1	0	0	0
P05787;CON__P05787;CON__H-INV:HIT000292931	P05787;CON__P05787	3;3;1	3;3;1	3;3;1	Keratin, type II cytoskeletal 8	KRT8	sp|P05787|K2C8_HUMAN Keratin, type II cytoskeletal 8 OS=Homo sapiens GN=KRT8 PE=1 SV=7;	3	3	3	3	2	2	1	0	0	1	2	2	0	2	0	1	1	2	2	0	2	2	1	0	0	1	2	2	0	2	0	1	1	2	2	0	2	2	1	0	0	1
CON__P06868;P00747	CON__P06868	13;1	13;1	13;1				2	13	13	13	4	5	7	7	7	6	8	7	6	7	3	6	6	2	4	1	4	5	7	7	7	6	8	7	6	7	3	6	6	2	4	1	4	5	7	7	7	6
CON__P07224	CON__P07224	1	1	1				1	1	1	1	0	0	0	1	0	0	0	0	0	0	0	0	0	0	0	0	0	0	0	1	0	0	0	0	0	0	0	0	0	0	0	0	0	0	0	1	0	0
CON__P07477;Q8NHM4;P07478;P07477	CON__P07477;Q8NHM4;P07478;P07477	1;1;1;1	1;1;1;1	1;1;1;1	Putative trypsin-6;Trypsin-2;Trypsin-1;Alpha-trypsin chain 1;Alpha-trypsin chain 2	PRSS3P2;PRSS2;PRSS1	sp|Q8NHM4|TRY6_HUMAN Putative trypsin-6 OS=Homo sapiens GN=PRSS3P2 PE=5 SV=2;sp|P07478|TRY2_HUMAN Trypsin-2 OS=Homo sapiens GN=PRSS2 PE=1 SV=1;sp|P07477|TRY1_HUMAN Trypsin-1 OS=Homo sapiens GN=PRSS1 PE=1 SV=1	4	1	1	1	1	1	0	0	0	0	1	1	0	0	0	1	0	0	0	0	1	1	0	0	0	0	1	1	0	0	0	1	0	0	0	0	1	1	0	0	0	0
CON__P08779;P08779;CON__Q9Z2K1;CON__Q3ZAW8	CON__P08779;P08779;CON__Q9Z2K1;CON__Q3ZAW8	2;2;1;1	2;2;1;1	2;2;1;1	Keratin, type I cytoskeletal 16	KRT16	sp|P08779|K1C16_HUMAN Keratin, type I cytoskeletal 16 OS=Homo sapiens GN=KRT16 PE=1 SV=4;	4	2	2	2	1	1	0	1	2	2	2	0	0	0	1	1	2	1	1	0	1	1	0	1	2	2	2	0	0	0	1	1	2	1	1	0	1	1	0	1	2	2
CON__P12763;P02765	CON__P12763	9;1	9;1	9;1				2	9	9	9	5	6	7	7	4	7	5	4	5	7	3	3	4	4	4	2	5	6	7	7	4	7	5	4	5	7	3	3	4	4	4	2	5	6	7	7	4	7
P13645;CON__P13645;CON__P02535-1	P13645;CON__P13645	12;12;1	12;12;1	12;12;1	Keratin, type I cytoskeletal 10	KRT10	sp|P13645|K1C10_HUMAN Keratin, type I cytoskeletal 10 OS=Homo sapiens GN=KRT10 PE=1 SV=6;	3	12	12	12	2	3	4	3	8	8	2	4	2	3	7	7	9	8	5	3	2	3	4	3	8	8	2	4	2	3	7	7	9	8	5	3	2	3	4	3	8	8
CON__P13717	CON__P13717	3	3	3				1	3	3	3	2	2	2	2	0	0	3	3	2	2	0	0	2	3	3	3	2	2	2	2	0	0	3	3	2	2	0	0	2	3	3	3	2	2	2	2	0	0
CON__P15497;P02647	CON__P15497;P02647	2;1	2;1	2;1	Apolipoprotein A-I;Proapolipoprotein A-I;Truncated apolipoprotein A-I	APOA1	sp|P02647|APOA1_HUMAN Apolipoprotein A-I OS=Homo sapiens GN=APOA1 PE=1 SV=1	2	2	2	2	1	0	1	1	2	1	1	1	0	1	0	0	1	1	0	0	1	0	1	1	2	1	1	1	0	1	0	0	1	1	0	0	1	0	1	1	2	1
CON__P15636	CON__P15636	11	11	11				1	11	11	11	9	9	10	9	8	7	5	5	7	6	7	6	8	7	8	5	9	9	10	9	8	7	5	5	7	6	7	6	8	7	8	5	9	9	10	9	8	7
CON__P17690	CON__P17690	7	7	7				1	7	7	7	4	6	6	5	4	3	6	4	4	4	3	4	3	4	2	2	4	6	6	5	4	3	6	4	4	4	3	4	3	4	2	2	4	6	6	5	4	3
CON__P17697	CON__P17697	3	3	3				1	3	3	3	3	2	2	3	1	2	2	2	2	3	1	1	2	1	1	0	3	2	2	3	1	2	2	2	2	3	1	1	2	1	1	0	3	2	2	3	1	2
CON__P28800	CON__P28800	2	2	2				1	2	2	2	0	0	0	0	0	1	1	1	0	1	0	0	1	2	0	0	0	0	0	0	0	1	1	1	0	1	0	0	1	2	0	0	0	0	0	0	0	1
CON__P34955	CON__P34955	6	6	6				1	6	6	6	1	3	4	4	4	5	5	3	3	4	1	1	3	2	2	1	1	3	4	4	4	5	5	3	3	4	1	1	3	2	2	1	1	3	4	4	4	5
CON__P35527;P35527	CON__P35527;P35527	12;12	12;12	12;12	Keratin, type I cytoskeletal 9	KRT9	sp|P35527|K1C9_HUMAN Keratin, type I cytoskeletal 9 OS=Homo sapiens GN=KRT9 PE=1 SV=3	2	12	12	12	8	8	9	9	10	11	9	7	8	7	8	10	9	9	9	3	8	8	9	9	10	11	9	7	8	7	8	10	9	9	9	3	8	8	9	9	10	11
CON__P35908v2;P35908;CON__P35908	CON__P35908v2;P35908;CON__P35908	9;9;8	8;8;7	8;8;7	Keratin, type II cytoskeletal 2 epidermal	KRT2	sp|P35908|K22E_HUMAN Keratin, type II cytoskeletal 2 epidermal OS=Homo sapiens GN=KRT2 PE=1 SV=2;	3	9	8	8	2	3	2	4	7	7	3	1	3	4	6	6	9	7	5	4	2	3	2	4	6	6	3	1	3	4	5	5	8	7	4	4	2	3	2	4	6	6
CON__P41361	CON__P41361	4	4	4				1	4	4	4	3	3	3	4	3	3	2	2	2	2	1	0	3	3	2	2	3	3	3	4	3	3	2	2	2	2	1	0	3	3	2	2	3	3	3	4	3	3
CON__P50448	CON__P50448	1	1	1				1	1	1	1	0	0	0	0	1	0	0	0	0	0	0	0	0	1	1	0	0	0	0	0	1	0	0	0	0	0	0	0	0	1	1	0	0	0	0	0	1	0
CON__P81644	CON__P81644	1	1	1				1	1	1	1	0	0	0	0	0	0	0	0	0	0	0	0	0	1	0	0	0	0	0	0	0	0	0	0	0	0	0	0	0	1	0	0	0	0	0	0	0	0
CON__Q03247	CON__Q03247	2	2	2				1	2	2	2	0	0	1	2	0	2	1	1	0	0	1	0	0	2	0	2	0	0	1	2	0	2	1	1	0	0	1	0	0	2	0	2	0	0	1	2	0	2
CON__Q9QWL7;CON__Q04695;Q04695	CON__Q9QWL7;CON__Q04695;Q04695	1;1;1	1;1;1	1;1;1	Keratin, type I cytoskeletal 17	KRT17	sp|Q04695|K1C17_HUMAN Keratin, type I cytoskeletal 17 OS=Homo sapiens GN=KRT17 PE=1 SV=2	3	1	1	1	1	1	0	1	0	1	0	0	0	0	0	0	0	0	0	0	1	1	0	1	0	1	0	0	0	0	0	0	0	0	0	0	1	1	0	1	0	1
CON__Q05443	CON__Q05443	2	2	2				1	2	2	2	1	1	1	2	1	0	1	0	0	0	0	0	0	0	0	0	1	1	1	2	1	0	1	0	0	0	0	0	0	0	0	0	1	1	1	2	1	0
CON__Q05B55	CON__Q05B55	2	2	2				1	2	2	2	1	2	1	1	1	1	1	1	2	1	0	0	2	2	2	0	1	2	1	1	1	1	1	1	2	1	0	0	2	2	2	0	1	2	1	1	1	1
CON__Q29443;CON__Q0IIK2	CON__Q29443;CON__Q0IIK2	18;18	18;18	18;18				2	18	18	18	7	7	9	10	9	11	9	12	8	6	5	5	8	9	6	6	7	7	9	10	9	11	9	12	8	6	5	5	8	9	6	6	7	7	9	10	9	11
CON__Q0V8M9	CON__Q0V8M9	5	5	5				1	5	5	5	1	1	1	2	1	2	1	2	1	1	0	0	1	3	0	1	1	1	1	2	1	2	1	2	1	1	0	0	1	3	0	1	1	1	1	2	1	2
CON__Q0VCM5	CON__Q0VCM5	4	4	4				1	4	4	4	0	0	2	2	1	0	1	1	2	1	0	0	0	0	0	0	0	0	2	2	1	0	1	1	2	1	0	0	0	0	0	0	0	0	2	2	1	0
CON__Q1A7A4	CON__Q1A7A4	8	8	8				1	8	8	8	2	2	5	2	3	4	2	2	3	3	2	2	2	4	2	1	2	2	5	2	3	4	2	2	3	3	2	2	2	4	2	1	2	2	5	2	3	4
CON__Q1RMK2	CON__Q1RMK2	5	5	5				1	5	5	5	1	2	2	2	2	3	2	3	2	2	0	1	1	2	1	0	1	2	2	2	2	3	2	3	2	2	0	1	1	2	1	0	1	2	2	2	2	3
CON__Q1RMN8	CON__Q1RMN8	1	1	1				1	1	1	1	0	1	1	1	1	0	0	1	0	0	0	1	1	1	0	0	0	1	1	1	1	0	0	1	0	0	0	1	1	1	0	0	0	1	1	1	1	0
CON__Q28065	CON__Q28065	1	1	1				1	1	1	1	1	1	1	1	0	1	0	0	1	0	1	1	0	0	0	0	1	1	1	1	0	1	0	0	1	0	1	1	0	0	0	0	1	1	1	1	0	1
CON__Q28085	CON__Q28085	12	12	12				1	12	12	12	5	7	7	5	6	6	9	7	6	5	5	7	6	5	6	1	5	7	7	5	6	6	9	7	6	5	5	7	6	5	6	1	5	7	7	5	6	6
CON__Q28107	CON__Q28107	9	9	9				1	9	9	9	4	5	5	3	4	5	4	1	6	4	1	3	0	3	1	0	4	5	5	3	4	5	4	1	6	4	1	3	0	3	1	0	4	5	5	3	4	5
CON__Q28194	CON__Q28194	10	1	1				1	10	1	1	5	6	5	5	4	5	6	3	4	4	2	2	5	3	5	1	1	1	1	1	1	1	1	0	0	0	0	0	1	1	0	1	1	1	1	1	1	1
CON__Q29RQ1	CON__Q29RQ1	1	1	1				1	1	1	1	0	0	0	0	0	0	0	0	0	1	0	0	0	0	0	0	0	0	0	0	0	0	0	0	0	1	0	0	0	0	0	0	0	0	0	0	0	0
CON__Q2KIF2	CON__Q2KIF2	2	2	2				1	2	2	2	1	1	1	2	0	1	1	0	2	1	0	1	1	0	0	0	1	1	1	2	0	1	1	0	2	1	0	1	1	0	0	0	1	1	1	2	0	1
CON__Q2KIG3	CON__Q2KIG3	2	2	2				1	2	2	2	1	0	1	1	0	1	1	0	2	1	0	0	1	0	0	0	1	0	1	1	0	1	1	0	2	1	0	0	1	0	0	0	1	0	1	1	0	1
CON__Q2KIS7;P05452	CON__Q2KIS7;P05452	2;1	2;1	2;1	Tetranectin	CLEC3B	sp|P05452|TETN_HUMAN Tetranectin OS=Homo sapiens GN=CLEC3B PE=1 SV=3	2	2	2	2	1	1	0	1	1	1	1	1	1	1	0	1	0	1	0	1	1	1	0	1	1	1	1	1	1	1	0	1	0	1	0	1	1	1	0	1	1	1
CON__Q2KJ62	CON__Q2KJ62	4	4	1				1	4	4	1	1	2	2	2	1	1	3	4	2	2	1	1	2	1	1	0	1	2	2	2	1	1	3	4	2	2	1	1	2	1	1	0	1	1	1	1	1	1
CON__Q2KJ83	CON__Q2KJ83	2	2	2				1	2	2	2	0	1	0	0	0	0	0	1	0	0	0	0	1	0	0	0	0	1	0	0	0	0	0	1	0	0	0	0	1	0	0	0	0	1	0	0	0	0
CON__Q2KJC7;Q15063	CON__Q2KJC7;Q15063	5;3	5;3	5;3	Periostin	POSTN	sp|Q15063|POSTN_HUMAN Periostin OS=Homo sapiens GN=POSTN PE=1 SV=2	2	5	5	5	2	4	4	4	3	2	4	2	2	1	1	1	3	0	0	0	2	4	4	4	3	2	4	2	2	1	1	1	3	0	0	0	2	4	4	4	3	2
CON__Q2KJF1	CON__Q2KJF1	7	7	7				1	7	7	7	4	4	5	4	4	6	5	5	4	5	3	2	3	3	4	0	4	4	5	4	4	6	5	5	4	5	3	2	3	3	4	0	4	4	5	4	4	6
CON__Q2TBQ1	CON__Q2TBQ1	6	6	6				1	6	6	6	2	1	3	4	1	2	1	0	0	3	0	2	0	1	1	0	2	1	3	4	1	2	1	0	0	3	0	2	0	1	1	0	2	1	3	4	1	2
CON__Q2UVX4	CON__Q2UVX4	17	17	17				1	17	17	17	7	11	8	9	10	10	11	10	9	9	5	7	12	11	7	2	7	11	8	9	10	10	11	10	9	9	5	7	12	11	7	2	7	11	8	9	10	10
CON__Q32PI4	CON__Q32PI4	2	2	2				1	2	2	2	0	1	1	1	0	0	1	0	1	0	0	0	1	0	0	0	0	1	1	1	0	0	1	0	1	0	0	0	1	0	0	0	0	1	1	1	0	0
CON__Q32PJ2	CON__Q32PJ2	1	1	1				1	1	1	1	0	0	0	0	0	0	0	0	0	1	0	1	0	0	0	0	0	0	0	0	0	0	0	0	0	1	0	1	0	0	0	0	0	0	0	0	0	0
CON__Q3KUS7	CON__Q3KUS7	7	7	7				1	7	7	7	4	5	4	3	5	5	3	4	2	3	1	1	5	5	0	0	4	5	4	3	5	5	3	4	2	3	1	1	5	5	0	0	4	5	4	3	5	5
CON__Q3MHN2	CON__Q3MHN2	5	5	5				1	5	5	5	3	2	3	3	2	3	3	2	2	2	2	4	4	1	2	0	3	2	3	3	2	3	3	2	2	2	2	4	4	1	2	0	3	2	3	3	2	3
CON__Q3MHN5;CON__ENSEMBL:ENSBTAP00000018229	CON__Q3MHN5;CON__ENSEMBL:ENSBTAP00000018229	9;8	9;8	7;6				2	9	9	7	3	5	5	5	3	3	7	6	4	5	3	2	4	7	3	1	3	5	5	5	3	3	7	6	4	5	3	2	4	7	3	1	1	3	3	3	1	2
CON__Q3SX09	CON__Q3SX09	3	3	3				1	3	3	3	1	1	1	2	2	1	3	1	1	2	0	1	1	0	1	1	1	1	1	2	2	1	3	1	1	2	0	1	1	0	1	1	1	1	1	2	2	1
CON__Q3SX14	CON__Q3SX14	9	9	6				1	9	9	6	2	3	2	3	4	4	2	4	4	3	2	2	4	5	2	0	2	3	2	3	4	4	2	4	4	3	2	2	4	5	2	0	2	2	2	2	4	3
CON__Q3SX28	CON__Q3SX28	1	1	1				1	1	1	1	0	1	1	0	0	0	0	0	1	0	0	0	0	0	0	0	0	1	1	0	0	0	0	0	1	0	0	0	0	0	0	0	0	1	1	0	0	0
CON__Q3SZ57	CON__Q3SZ57	8	8	8				1	8	8	8	2	2	2	4	7	6	4	3	3	3	1	4	5	5	4	1	2	2	2	4	7	6	4	3	3	3	1	4	5	5	4	1	2	2	2	4	7	6
CON__Q3SZH5	CON__Q3SZH5	3	3	3				1	3	3	3	1	2	2	1	1	2	0	2	1	1	1	0	1	2	1	2	1	2	2	1	1	2	0	2	1	1	1	0	1	2	1	2	1	2	2	1	1	2
CON__Q3SZV7	CON__Q3SZV7	4	4	4				1	4	4	4	2	1	2	2	1	1	2	3	2	3	0	0	1	2	1	1	2	1	2	2	1	1	2	3	2	3	0	0	1	2	1	1	2	1	2	2	1	1
CON__Q3T052	CON__Q3T052	8	8	8				1	8	8	8	2	4	3	4	2	3	3	4	3	5	1	2	5	5	3	0	2	4	3	4	2	3	3	4	3	5	1	2	5	5	3	0	2	4	3	4	2	3
CON__Q3TTY5	CON__Q3TTY5	1	1	1				1	1	1	1	0	0	0	0	0	1	0	0	0	0	0	0	0	0	0	0	0	0	0	0	0	1	0	0	0	0	0	0	0	0	0	0	0	0	0	0	0	1
CON__Q3ZBD7	CON__Q3ZBD7	4	2	2				1	4	2	2	2	2	2	2	1	1	2	2	2	2	1	1	2	3	2	1	1	1	1	1	0	0	1	1	1	1	0	0	0	2	1	0	1	1	1	1	0	0
CON__Q3ZBS7;P04004	CON__Q3ZBS7	8;1	8;1	8;1				2	8	8	8	3	4	3	5	5	6	3	3	5	3	4	4	5	2	3	2	3	4	3	5	5	6	3	3	5	3	4	4	5	2	3	2	3	4	3	5	5	6
CON__Q58D62	CON__Q58D62	7	7	7				1	7	7	7	2	3	4	4	4	6	3	3	4	4	2	3	3	4	2	1	2	3	4	4	4	6	3	3	4	4	2	3	3	4	2	1	2	3	4	4	4	6
CON__Q5D862;Q5D862	CON__Q5D862;Q5D862	1;1	1;1	1;1	Filaggrin-2	FLG2	sp|Q5D862|FILA2_HUMAN Filaggrin-2 OS=Homo sapiens GN=FLG2 PE=1 SV=1	2	1	1	1	0	0	0	0	1	1	0	0	0	0	1	1	0	0	0	0	0	0	0	0	1	1	0	0	0	0	1	1	0	0	0	0	0	0	0	0	1	1
CON__Q6KB66-1;Q6KB66	CON__Q6KB66-1;Q6KB66	1;1	1;1	1;1	Keratin, type II cytoskeletal 80	KRT80	sp|Q6KB66|K2C80_HUMAN Keratin, type II cytoskeletal 80 OS=Homo sapiens GN=KRT80 PE=1 SV=2	2	1	1	1	0	0	0	0	0	0	0	0	0	0	0	0	1	1	1	0	0	0	0	0	0	0	0	0	0	0	0	0	1	1	1	0	0	0	0	0	0	0
CON__Q86YZ3;Q86YZ3	CON__Q86YZ3;Q86YZ3	2;2	2;2	2;2	Hornerin	HRNR	sp|Q86YZ3|HORN_HUMAN Hornerin OS=Homo sapiens GN=HRNR PE=1 SV=2	2	2	2	2	1	1	0	0	2	2	0	0	0	0	1	1	2	0	2	0	1	1	0	0	2	2	0	0	0	0	1	1	2	0	2	0	1	1	0	0	2	2
CON__Q95121	CON__Q95121	1	1	1				1	1	1	1	0	0	0	0	0	0	1	1	0	1	0	0	0	0	0	0	0	0	0	0	0	0	1	1	0	1	0	0	0	0	0	0	0	0	0	0	0	0
CON__Q9BYR9;Q9BYT5;Q9BYU5;Q9BYR9;P0C7H8	CON__Q9BYR9;Q9BYT5;Q9BYU5;Q9BYR9;P0C7H8	1;1;1;1;1	1;1;1;1;1	1;1;1;1;1	Keratin-associated protein 2-2;Keratin-associated protein 2-1;Keratin-associated protein 2-4;Keratin-associated protein 2-3	KRTAP2-2;KRTAP2-1;KRTAP2-4;KRTAP2-3	sp|Q9BYT5|KRA22_HUMAN Keratin-associated protein 2-2 OS=Homo sapiens GN=KRTAP2-2 PE=2 SV=3;sp|Q9BYU5|KRA21_HUMAN Keratin-associated protein 2-1 OS=Homo sapiens GN=KRTAP2-1 PE=2 SV=2;sp|Q9BYR9|KRA24_HUMAN Keratin-associated protein 2-4 OS=Homo sapiens GN=K	5	1	1	1	0	0	0	0	0	0	0	0	0	0	0	0	1	0	0	0	0	0	0	0	0	0	0	0	0	0	0	0	1	0	0	0	0	0	0	0	0	0
CON__Q9N2I2	CON__Q9N2I2	4	4	4				1	4	4	4	3	4	3	1	3	2	2	4	2	3	1	1	4	3	1	0	3	4	3	1	3	2	2	4	2	3	1	1	4	3	1	0	3	4	3	1	3	2
CON__Q9TRI1	CON__Q9TRI1	9	9	9				1	9	9	9	1	3	3	5	3	2	5	6	4	4	0	0	2	6	2	1	1	3	3	5	3	2	5	6	4	4	0	0	2	6	2	1	1	3	3	5	3	2
CON__Q9TTE1;CON__A2I7N1;CON__A2I7N0	CON__Q9TTE1	3;1;1	3;1;1	3;1;1				3	3	3	3	1	1	1	1	2	3	2	2	3	2	2	1	2	1	0	0	1	1	1	1	2	3	2	2	3	2	2	1	2	1	0	0	1	1	1	1	2	3
CON__REFSEQ:XP_001252647	CON__REFSEQ:XP_001252647	1	1	1				1	1	1	1	1	0	1	1	0	0	1	1	1	1	0	0	1	1	0	0	1	0	1	1	0	0	1	1	1	1	0	0	1	1	0	0	1	0	1	1	0	0
CON__REFSEQ:XP_585019	CON__REFSEQ:XP_585019	4	4	4				1	4	4	4	0	0	0	0	3	3	0	2	3	1	0	0	1	1	0	0	0	0	0	0	3	3	0	2	3	1	0	0	1	1	0	0	0	0	0	0	3	3
O00116	O00116	7	7	7	Alkyldihydroxyacetonephosphate synthase, peroxisomal	AGPS	sp|O00116|ADAS_HUMAN Alkyldihydroxyacetonephosphate synthase, peroxisomal OS=Homo sapiens GN=AGPS PE=1 SV=1	1	7	7	7	4	4	3	2	5	4	4	6	4	3	4	3	4	3	4	2	4	4	3	2	5	4	4	6	4	3	4	3	4	3	4	2	4	4	3	2	5	4
O00139	O00139	7	7	7	Kinesin-like protein KIF2A	KIF2A	sp|O00139|KIF2A_HUMAN Kinesin-like protein KIF2A OS=Homo sapiens GN=KIF2A PE=1 SV=3	1	7	7	7	2	2	1	1	1	2	1	2	1	0	2	1	4	0	3	0	2	2	1	1	1	2	1	2	1	0	2	1	4	0	3	0	2	2	1	1	1	2
O00148	O00148	5	4	4	ATP-dependent RNA helicase DDX39A	DDX39A	sp|O00148|DX39A_HUMAN ATP-dependent RNA helicase DDX39A OS=Homo sapiens GN=DDX39A PE=1 SV=2	1	5	4	4	1	1	1	2	2	2	4	3	3	2	2	2	3	3	2	1	1	1	0	1	2	2	3	2	2	1	2	2	2	2	1	1	1	1	0	1	2	2
O00151	O00151	4	4	4	PDZ and LIM domain protein 1	PDLIM1	sp|O00151|PDLI1_HUMAN PDZ and LIM domain protein 1 OS=Homo sapiens GN=PDLIM1 PE=1 SV=4	1	4	4	4	2	2	2	2	1	1	3	3	2	0	0	1	1	2	1	0	2	2	2	2	1	1	3	3	2	0	0	1	1	2	1	0	2	2	2	2	1	1
O00159	O00159	8	8	8	Unconventional myosin-Ic	MYO1C	sp|O00159|MYO1C_HUMAN Unconventional myosin-Ic OS=Homo sapiens GN=MYO1C PE=1 SV=4	1	8	8	8	5	4	2	3	0	3	4	4	3	2	2	3	4	4	2	1	5	4	2	3	0	3	4	4	3	2	2	3	4	4	2	1	5	4	2	3	0	3
O00161	O00161	4	4	4	Synaptosomal-associated protein 23	SNAP23	sp|O00161|SNP23_HUMAN Synaptosomal-associated protein 23 OS=Homo sapiens GN=SNAP23 PE=1 SV=1	1	4	4	4	2	3	2	2	2	2	1	3	1	3	0	2	2	2	0	0	2	3	2	2	2	2	1	3	1	3	0	2	2	2	0	0	2	3	2	2	2	2
O00165	O00165	5	5	5	HCLS1-associated protein X-1	HAX1	sp|O00165|HAX1_HUMAN HCLS1-associated protein X-1 OS=Homo sapiens GN=HAX1 PE=1 SV=2	1	5	5	5	2	4	4	5	2	4	4	1	5	5	2	4	4	2	3	0	2	4	4	5	2	4	4	1	5	5	2	4	4	2	3	0	2	4	4	5	2	4
O00170	O00170	2	2	2	AH receptor-interacting protein	AIP	sp|O00170|AIP_HUMAN AH receptor-interacting protein OS=Homo sapiens GN=AIP PE=1 SV=2	1	2	2	2	1	1	1	1	1	1	1	2	1	1	1	1	1	0	1	0	1	1	1	1	1	1	1	2	1	1	1	1	1	0	1	0	1	1	1	1	1	1
O00178	O00178	3	3	3	GTP-binding protein 1	GTPBP1	sp|O00178|GTPB1_HUMAN GTP-binding protein 1 OS=Homo sapiens GN=GTPBP1 PE=1 SV=3	1	3	3	3	0	0	1	1	0	0	1	0	2	2	0	1	0	1	0	0	0	0	1	1	0	0	1	0	2	2	0	1	0	1	0	0	0	0	1	1	0	0
O00180	O00180	1	1	1	Potassium channel subfamily K member 1	KCNK1	sp|O00180|KCNK1_HUMAN Potassium channel subfamily K member 1 OS=Homo sapiens GN=KCNK1 PE=1 SV=1	1	1	1	1	0	0	1	1	0	0	0	0	1	0	0	0	0	0	0	0	0	0	1	1	0	0	0	0	1	0	0	0	0	0	0	0	0	0	1	1	0	0
O00186	O00186	4	4	4	Syntaxin-binding protein 3	STXBP3	sp|O00186|STXB3_HUMAN Syntaxin-binding protein 3 OS=Homo sapiens GN=STXBP3 PE=1 SV=2	1	4	4	4	0	0	0	0	1	1	2	2	2	3	1	1	2	3	1	0	0	0	0	0	1	1	2	2	2	3	1	1	2	3	1	0	0	0	0	0	1	1
O00192	O00192	2	2	2	Armadillo repeat protein deleted in velo-cardio-facial syndrome	ARVCF	sp|O00192|ARVC_HUMAN Armadillo repeat protein deleted in velo-cardio-facial syndrome OS=Homo sapiens GN=ARVCF PE=1 SV=1	1	2	2	2	0	0	2	1	0	0	1	0	1	1	1	0	0	0	1	0	0	0	2	1	0	0	1	0	1	1	1	0	0	0	1	0	0	0	2	1	0	0
O00193	O00193	3	3	3	Small acidic protein	SMAP	sp|O00193|SMAP_HUMAN Small acidic protein OS=Homo sapiens GN=SMAP PE=1 SV=1	1	3	3	3	3	3	3	3	2	2	3	2	3	3	1	2	2	2	2	0	3	3	3	3	2	2	3	2	3	3	1	2	2	2	2	0	3	3	3	3	2	2
O00203	O00203	4	4	4	AP-3 complex subunit beta-1	AP3B1	sp|O00203|AP3B1_HUMAN AP-3 complex subunit beta-1 OS=Homo sapiens GN=AP3B1 PE=1 SV=3	1	4	4	4	3	3	3	2	2	2	2	2	2	2	1	2	1	2	1	1	3	3	3	2	2	2	2	2	2	2	1	2	1	2	1	1	3	3	3	2	2	2
O00217	O00217	1	1	1	NADH dehydrogenase [ubiquinone] iron-sulfur protein 8, mitochondrial	NDUFS8	sp|O00217|NDUS8_HUMAN NADH dehydrogenase [ubiquinone] iron-sulfur protein 8, mitochondrial OS=Homo sapiens GN=NDUFS8 PE=1 SV=1	1	1	1	1	0	1	0	1	0	1	1	1	0	1	0	0	1	1	0	0	0	1	0	1	0	1	1	1	0	1	0	0	1	1	0	0	0	1	0	1	0	1
O00221	O00221	2	2	2	NF-kappa-B inhibitor epsilon	NFKBIE	sp|O00221|IKBE_HUMAN NF-kappa-B inhibitor epsilon OS=Homo sapiens GN=NFKBIE PE=1 SV=3	1	2	2	2	1	1	1	2	0	1	0	0	2	1	0	0	0	0	1	0	1	1	1	2	0	1	0	0	2	1	0	0	0	0	1	0	1	1	1	2	0	1
O00231	O00231	3	3	3	26S proteasome non-ATPase regulatory subunit 11	PSMD11	sp|O00231|PSD11_HUMAN 26S proteasome non-ATPase regulatory subunit 11 OS=Homo sapiens GN=PSMD11 PE=1 SV=3	1	3	3	3	2	2	2	2	3	3	2	2	2	2	2	2	3	2	2	1	2	2	2	2	3	3	2	2	2	2	2	2	3	2	2	1	2	2	2	2	3	3
O00232	O00232	4	4	4	26S proteasome non-ATPase regulatory subunit 12	PSMD12	sp|O00232|PSD12_HUMAN 26S proteasome non-ATPase regulatory subunit 12 OS=Homo sapiens GN=PSMD12 PE=1 SV=3	1	4	4	4	2	1	0	1	2	1	3	4	3	2	1	1	0	3	0	0	2	1	0	1	2	1	3	4	3	2	1	1	0	3	0	0	2	1	0	1	2	1
O00233	O00233	1	1	1	26S proteasome non-ATPase regulatory subunit 9	PSMD9	sp|O00233|PSMD9_HUMAN 26S proteasome non-ATPase regulatory subunit 9 OS=Homo sapiens GN=PSMD9 PE=1 SV=3	1	1	1	1	1	1	1	1	1	0	1	1	1	1	0	1	0	0	1	0	1	1	1	1	1	0	1	1	1	1	0	1	0	0	1	0	1	1	1	1	1	0
O00241	O00241	1	1	1	Signal-regulatory protein beta-1	SIRPB1	sp|O00241|SIRB1_HUMAN Signal-regulatory protein beta-1 OS=Homo sapiens GN=SIRPB1 PE=1 SV=5	1	1	1	1	0	0	0	0	1	1	0	0	0	0	0	0	1	0	0	0	0	0	0	0	1	1	0	0	0	0	0	0	1	0	0	0	0	0	0	0	1	1
O00244	O00244	1	1	1	Copper transport protein ATOX1	ATOX1	sp|O00244|ATOX1_HUMAN Copper transport protein ATOX1 OS=Homo sapiens GN=ATOX1 PE=1 SV=1	1	1	1	1	0	0	0	0	0	0	1	1	1	1	0	0	0	0	0	0	0	0	0	0	0	0	1	1	1	1	0	0	0	0	0	0	0	0	0	0	0	0
O00255	O00255	2	2	2	Menin	MEN1	sp|O00255|MEN1_HUMAN Menin OS=Homo sapiens GN=MEN1 PE=1 SV=4	1	2	2	2	0	0	0	0	0	0	1	1	0	0	0	0	0	1	0	0	0	0	0	0	0	0	1	1	0	0	0	0	0	1	0	0	0	0	0	0	0	0
O00264	O00264	8	8	8	Membrane-associated progesterone receptor component 1	PGRMC1	sp|O00264|PGRC1_HUMAN Membrane-associated progesterone receptor component 1 OS=Homo sapiens GN=PGRMC1 PE=1 SV=3	1	8	8	8	3	4	6	4	6	5	4	3	4	4	6	6	6	4	4	2	3	4	6	4	6	5	4	3	4	4	6	6	6	4	4	2	3	4	6	4	6	5
O00267	O00267	7	7	7	Transcription elongation factor SPT5	SUPT5H	sp|O00267|SPT5H_HUMAN Transcription elongation factor SPT5 OS=Homo sapiens GN=SUPT5H PE=1 SV=1	1	7	7	7	3	3	2	3	2	3	5	1	3	5	2	2	4	2	3	0	3	3	2	3	2	3	5	1	3	5	2	2	4	2	3	0	3	3	2	3	2	3
O00273	O00273	3	3	3	DNA fragmentation factor subunit alpha	DFFA	sp|O00273|DFFA_HUMAN DNA fragmentation factor subunit alpha OS=Homo sapiens GN=DFFA PE=1 SV=1	1	3	3	3	1	2	1	2	0	0	2	0	1	2	0	0	0	1	1	0	1	2	1	2	0	0	2	0	1	2	0	0	0	1	1	0	1	2	1	2	0	0
O00291	O00291	1	1	1	Huntingtin-interacting protein 1	HIP1	sp|O00291|HIP1_HUMAN Huntingtin-interacting protein 1 OS=Homo sapiens GN=HIP1 PE=1 SV=5	1	1	1	1	0	0	0	0	0	0	0	1	1	0	0	0	0	0	0	0	0	0	0	0	0	0	0	1	1	0	0	0	0	0	0	0	0	0	0	0	0	0
O00299	O00299	4	4	4	Chloride intracellular channel protein 1	CLIC1	sp|O00299|CLIC1_HUMAN Chloride intracellular channel protein 1 OS=Homo sapiens GN=CLIC1 PE=1 SV=4	1	4	4	4	2	3	2	2	2	2	3	4	3	3	2	2	2	2	1	1	2	3	2	2	2	2	3	4	3	3	2	2	2	2	1	1	2	3	2	2	2	2
O00303	O00303	3	3	3	Eukaryotic translation initiation factor 3 subunit F	EIF3F	sp|O00303|EIF3F_HUMAN Eukaryotic translation initiation factor 3 subunit F OS=Homo sapiens GN=EIF3F PE=1 SV=1	1	3	3	3	2	2	3	1	0	2	3	2	2	3	0	0	1	2	0	1	2	2	3	1	0	2	3	2	2	3	0	0	1	2	0	1	2	2	3	1	0	2
O00308	O00308	2	1	1	NEDD4-like E3 ubiquitin-protein ligase WWP2	WWP2	sp|O00308|WWP2_HUMAN NEDD4-like E3 ubiquitin-protein ligase WWP2 OS=Homo sapiens GN=WWP2 PE=1 SV=2	1	2	1	1	0	0	0	0	0	0	0	1	0	0	0	0	1	0	0	0	0	0	0	0	0	0	0	1	0	0	0	0	0	0	0	0	0	0	0	0	0	0
O00330	O00330	3	3	3	Pyruvate dehydrogenase protein X component, mitochondrial	PDHX	sp|O00330|ODPX_HUMAN Pyruvate dehydrogenase protein X component, mitochondrial OS=Homo sapiens GN=PDHX PE=1 SV=3	1	3	3	3	1	0	1	1	0	0	1	0	1	1	0	0	1	1	0	0	1	0	1	1	0	0	1	0	1	1	0	0	1	1	0	0	1	0	1	1	0	0
O00339	O00339	4	4	4	Matrilin-2	MATN2	sp|O00339|MATN2_HUMAN Matrilin-2 OS=Homo sapiens GN=MATN2 PE=1 SV=4	1	4	4	4	2	1	2	2	0	0	2	0	1	1	0	0	1	1	1	0	2	1	2	2	0	0	2	0	1	1	0	0	1	1	1	0	2	1	2	2	0	0
O00391	O00391	2	2	2	Sulfhydryl oxidase 1	QSOX1	sp|O00391|QSOX1_HUMAN Sulfhydryl oxidase 1 OS=Homo sapiens GN=QSOX1 PE=1 SV=3	1	2	2	2	0	0	0	0	0	0	1	0	0	0	0	1	0	1	0	0	0	0	0	0	0	0	1	0	0	0	0	1	0	1	0	0	0	0	0	0	0	0
O00400	O00400	1	1	1	Acetyl-coenzyme A transporter 1	SLC33A1	sp|O00400|ACATN_HUMAN Acetyl-coenzyme A transporter 1 OS=Homo sapiens GN=SLC33A1 PE=1 SV=1	1	1	1	1	0	0	1	1	0	0	1	1	0	1	0	0	0	1	0	0	0	0	1	1	0	0	1	1	0	1	0	0	0	1	0	0	0	0	1	1	0	0
O00410	O00410	17	17	17	Importin-5	IPO5	sp|O00410|IPO5_HUMAN Importin-5 OS=Homo sapiens GN=IPO5 PE=1 SV=4	1	17	17	17	14	14	8	11	4	7	12	14	14	14	5	6	11	10	6	5	14	14	8	11	4	7	12	14	14	14	5	6	11	10	6	5	14	14	8	11	4	7
O00411	O00411	6	6	6	DNA-directed RNA polymerase, mitochondrial	POLRMT	sp|O00411|RPOM_HUMAN DNA-directed RNA polymerase, mitochondrial OS=Homo sapiens GN=POLRMT PE=1 SV=2	1	6	6	6	1	3	5	2	0	1	3	2	3	2	0	1	3	1	1	0	1	3	5	2	0	1	3	2	3	2	0	1	3	1	1	0	1	3	5	2	0	1
O00422	O00422	1	1	1	Histone deacetylase complex subunit SAP18	SAP18	sp|O00422|SAP18_HUMAN Histone deacetylase complex subunit SAP18 OS=Homo sapiens GN=SAP18 PE=1 SV=1	1	1	1	1	1	1	1	1	0	0	1	1	1	1	0	0	1	1	0	0	1	1	1	1	0	0	1	1	1	1	0	0	1	1	0	0	1	1	1	1	0	0
O00425	O00425	1	1	1	Insulin-like growth factor 2 mRNA-binding protein 3	IGF2BP3	sp|O00425|IF2B3_HUMAN Insulin-like growth factor 2 mRNA-binding protein 3 OS=Homo sapiens GN=IGF2BP3 PE=1 SV=2	1	1	1	1	1	1	0	0	1	0	1	1	1	1	1	1	1	1	0	1	1	1	0	0	1	0	1	1	1	1	1	1	1	1	0	1	1	1	0	0	1	0
O00429	O00429	11	11	11	Dynamin-1-like protein	DNM1L	sp|O00429|DNM1L_HUMAN Dynamin-1-like protein OS=Homo sapiens GN=DNM1L PE=1 SV=2	1	11	11	11	7	7	6	5	2	5	6	5	7	6	1	2	4	6	2	1	7	7	6	5	2	5	6	5	7	6	1	2	4	6	2	1	7	7	6	5	2	5
O00442	O00442	2	2	2	RNA 3-terminal phosphate cyclase	RTCA	sp|O00442|RTCA_HUMAN RNA 3-terminal phosphate cyclase OS=Homo sapiens GN=RTCA PE=1 SV=1	1	2	2	2	1	1	1	1	1	1	1	1	1	1	1	0	1	1	1	0	1	1	1	1	1	1	1	1	1	1	1	0	1	1	1	0	1	1	1	1	1	1
O00443	O00443	5	5	5	Phosphatidylinositol 4-phosphate 3-kinase C2 domain-containing subunit alpha	PIK3C2A	sp|O00443|P3C2A_HUMAN Phosphatidylinositol 4-phosphate 3-kinase C2 domain-containing subunit alpha OS=Homo sapiens GN=PIK3C2A PE=1 SV=2	1	5	5	5	0	1	0	1	0	0	1	2	2	3	0	0	2	2	2	0	0	1	0	1	0	0	1	2	2	3	0	0	2	2	2	0	0	1	0	1	0	0
O00459	O00459	1	1	1	Phosphatidylinositol 3-kinase regulatory subunit beta	PIK3R2	sp|O00459|P85B_HUMAN Phosphatidylinositol 3-kinase regulatory subunit beta OS=Homo sapiens GN=PIK3R2 PE=1 SV=2	1	1	1	1	0	0	0	0	0	0	0	0	1	1	0	0	0	0	0	0	0	0	0	0	0	0	0	0	1	1	0	0	0	0	0	0	0	0	0	0	0	0
O00461	O00461	8	8	8	Golgi integral membrane protein 4	GOLIM4	sp|O00461|GOLI4_HUMAN Golgi integral membrane protein 4 OS=Homo sapiens GN=GOLIM4 PE=1 SV=1	1	8	8	8	3	4	5	4	2	4	7	2	4	3	4	5	4	0	4	0	3	4	5	4	2	4	7	2	4	3	4	5	4	0	4	0	3	4	5	4	2	4
O00469	O00469	5	5	5	Procollagen-lysine,2-oxoglutarate 5-dioxygenase 2	PLOD2	sp|O00469|PLOD2_HUMAN Procollagen-lysine,2-oxoglutarate 5-dioxygenase 2 OS=Homo sapiens GN=PLOD2 PE=1 SV=2	1	5	5	5	2	4	2	2	3	3	2	2	3	2	2	3	3	4	3	0	2	4	2	2	3	3	2	2	3	2	2	3	3	4	3	0	2	4	2	2	3	3
O00471	O00471	4	4	4	Exocyst complex component 5	EXOC5	sp|O00471|EXOC5_HUMAN Exocyst complex component 5 OS=Homo sapiens GN=EXOC5 PE=1 SV=1	1	4	4	4	2	3	1	1	1	1	2	3	2	2	1	0	1	1	0	0	2	3	1	1	1	1	2	3	2	2	1	0	1	1	0	0	2	3	1	1	1	1
O00472	O00472	2	2	2	RNA polymerase II elongation factor ELL2	ELL2	sp|O00472|ELL2_HUMAN RNA polymerase II elongation factor ELL2 OS=Homo sapiens GN=ELL2 PE=1 SV=2	1	2	2	2	2	1	0	0	0	0	0	0	1	1	0	0	0	0	0	0	2	1	0	0	0	0	0	0	1	1	0	0	0	0	0	0	2	1	0	0	0	0
O00487	O00487	2	2	2	26S proteasome non-ATPase regulatory subunit 14	PSMD14	sp|O00487|PSDE_HUMAN 26S proteasome non-ATPase regulatory subunit 14 OS=Homo sapiens GN=PSMD14 PE=1 SV=1	1	2	2	2	2	2	2	2	1	2	2	2	2	2	2	2	2	2	1	0	2	2	2	2	1	2	2	2	2	2	2	2	2	2	1	0	2	2	2	2	1	2
O00488	O00488	1	1	1	Zinc finger protein 593	ZNF593	sp|O00488|ZN593_HUMAN Zinc finger protein 593 OS=Homo sapiens GN=ZNF593 PE=1 SV=2	1	1	1	1	0	0	0	0	0	0	0	1	0	0	0	0	0	0	1	1	0	0	0	0	0	0	0	1	0	0	0	0	0	0	1	1	0	0	0	0	0	0
O00499	O00499	6	6	6	Myc box-dependent-interacting protein 1	BIN1	sp|O00499|BIN1_HUMAN Myc box-dependent-interacting protein 1 OS=Homo sapiens GN=BIN1 PE=1 SV=1	1	6	6	6	0	1	2	2	1	1	2	2	3	4	0	1	2	2	1	0	0	1	2	2	1	1	2	2	3	4	0	1	2	2	1	0	0	1	2	2	1	1
O00505	O00505	9	8	8	Importin subunit alpha-4	KPNA3	sp|O00505|IMA4_HUMAN Importin subunit alpha-4 OS=Homo sapiens GN=KPNA3 PE=1 SV=2	1	9	8	8	4	5	5	5	3	4	8	7	7	8	3	2	5	5	5	0	4	5	5	5	3	4	7	7	7	7	3	2	5	5	5	0	4	5	5	5	3	4
O00541	O00541	3	3	3	Pescadillo homolog	PES1	sp|O00541|PESC_HUMAN Pescadillo homolog OS=Homo sapiens GN=PES1 PE=1 SV=1	1	3	3	3	3	2	1	1	2	1	2	1	3	1	0	0	1	1	1	0	3	2	1	1	2	1	2	1	3	1	0	0	1	1	1	0	3	2	1	1	2	1
O00559	O00559	2	2	2	Receptor-binding cancer antigen expressed on SiSo cells	EBAG9	sp|O00559|RCAS1_HUMAN Receptor-binding cancer antigen expressed on SiSo cells OS=Homo sapiens GN=EBAG9 PE=1 SV=1	1	2	2	2	2	1	0	1	1	1	0	0	1	0	1	1	1	1	1	0	2	1	0	1	1	1	0	0	1	0	1	1	1	1	1	0	2	1	0	1	1	1
O00560	O00560	6	6	6	Syntenin-1	SDCBP	sp|O00560|SDCB1_HUMAN Syntenin-1 OS=Homo sapiens GN=SDCBP PE=1 SV=1	1	6	6	6	3	3	3	3	0	1	4	4	2	3	0	0	0	2	0	0	3	3	3	3	0	1	4	4	2	3	0	0	0	2	0	0	3	3	3	3	0	1
O00562	O00562	3	3	3	Membrane-associated phosphatidylinositol transfer protein 1	PITPNM1	sp|O00562|PITM1_HUMAN Membrane-associated phosphatidylinositol transfer protein 1 OS=Homo sapiens GN=PITPNM1 PE=1 SV=4	1	3	3	3	0	1	0	1	0	0	2	0	1	1	0	0	1	0	0	0	0	1	0	1	0	0	2	0	1	1	0	0	1	0	0	0	0	1	0	1	0	0
O00566	O00566	2	2	2	U3 small nucleolar ribonucleoprotein protein MPP10	MPHOSPH10	sp|O00566|MPP10_HUMAN U3 small nucleolar ribonucleoprotein protein MPP10 OS=Homo sapiens GN=MPHOSPH10 PE=1 SV=2	1	2	2	2	0	1	1	0	0	1	1	0	1	0	0	0	0	1	0	0	0	1	1	0	0	1	1	0	1	0	0	0	0	1	0	0	0	1	1	0	0	1
O00567	O00567	9	9	9	Nucleolar protein 56	NOP56	sp|O00567|NOP56_HUMAN Nucleolar protein 56 OS=Homo sapiens GN=NOP56 PE=1 SV=4	1	9	9	9	5	7	7	6	3	3	6	6	7	6	3	3	5	6	4	1	5	7	7	6	3	3	6	6	7	6	3	3	5	6	4	1	5	7	7	6	3	3
O00571	O00571	6	6	3	ATP-dependent RNA helicase DDX3X	DDX3X	sp|O00571|DDX3X_HUMAN ATP-dependent RNA helicase DDX3X OS=Homo sapiens GN=DDX3X PE=1 SV=3	1	6	6	3	2	3	3	2	3	3	4	3	4	5	3	3	1	3	3	1	2	3	3	2	3	3	4	3	4	5	3	3	1	3	3	1	2	3	3	2	2	2
O00592	O00592	2	2	2	Podocalyxin	PODXL	sp|O00592|PODXL_HUMAN Podocalyxin OS=Homo sapiens GN=PODXL PE=1 SV=2	1	2	2	2	1	1	1	1	1	0	2	1	1	1	0	0	0	0	0	0	1	1	1	1	1	0	2	1	1	1	0	0	0	0	0	0	1	1	1	1	1	0
O00622	O00622	5	5	5	Protein CYR61	CYR61	sp|O00622|CYR61_HUMAN Protein CYR61 OS=Homo sapiens GN=CYR61 PE=1 SV=1	1	5	5	5	5	5	4	3	3	3	4	4	4	4	4	2	5	4	3	3	5	5	4	3	3	3	4	4	4	4	4	2	5	4	3	3	5	5	4	3	3	3
O00629	O00629	9	9	8	Importin subunit alpha-3	KPNA4	sp|O00629|IMA3_HUMAN Importin subunit alpha-3 OS=Homo sapiens GN=KPNA4 PE=1 SV=1	1	9	9	8	6	6	5	6	4	5	7	7	6	6	5	4	5	6	5	2	6	6	5	6	4	5	7	7	6	6	5	4	5	6	5	2	6	6	5	6	4	5
O00743	O00743	2	2	2	Serine/threonine-protein phosphatase 6 catalytic subunit;Serine/threonine-protein phosphatase 6 catalytic subunit, N-terminally processed	PPP6C	sp|O00743|PPP6_HUMAN Serine/threonine-protein phosphatase 6 catalytic subunit OS=Homo sapiens GN=PPP6C PE=1 SV=1	1	2	2	2	2	2	2	1	2	2	2	2	2	2	2	1	1	2	1	0	2	2	2	1	2	2	2	2	2	2	2	1	1	2	1	0	2	2	2	1	2	2
O00754	O00754	1	1	1	Lysosomal alpha-mannosidase;Lysosomal alpha-mannosidase A peptide;Lysosomal alpha-mannosidase B peptide;Lysosomal alpha-mannosidase C peptide;Lysosomal alpha-mannosidase D peptide;Lysosomal alpha-mannosidase E peptide	MAN2B1	sp|O00754|MA2B1_HUMAN Lysosomal alpha-mannosidase OS=Homo sapiens GN=MAN2B1 PE=1 SV=3	1	1	1	1	0	0	1	0	0	0	1	0	0	1	0	0	0	0	0	0	0	0	1	0	0	0	1	0	0	1	0	0	0	0	0	0	0	0	1	0	0	0
O00762	O00762	2	2	2	Ubiquitin-conjugating enzyme E2 C	UBE2C	sp|O00762|UBE2C_HUMAN Ubiquitin-conjugating enzyme E2 C OS=Homo sapiens GN=UBE2C PE=1 SV=1	1	2	2	2	1	2	2	2	0	1	2	2	2	2	0	0	2	2	2	0	1	2	2	2	0	1	2	2	2	2	0	0	2	2	2	0	1	2	2	2	0	1
O00764	O00764	3	3	3	Pyridoxal kinase	PDXK	sp|O00764|PDXK_HUMAN Pyridoxal kinase OS=Homo sapiens GN=PDXK PE=1 SV=1	1	3	3	3	2	3	3	2	2	1	3	3	2	2	1	1	3	2	2	1	2	3	3	2	2	1	3	3	2	2	1	1	3	2	2	1	2	3	3	2	2	1
O00767	O00767	2	2	2	Acyl-CoA desaturase	SCD	sp|O00767|ACOD_HUMAN Acyl-CoA desaturase OS=Homo sapiens GN=SCD PE=1 SV=2	1	2	2	2	0	0	2	1	0	0	1	1	1	1	0	0	1	0	0	0	0	0	2	1	0	0	1	1	1	1	0	0	1	0	0	0	0	0	2	1	0	0
O14497;Q8NFD5	O14497	10;1	10;1	10;1	AT-rich interactive domain-containing protein 1A	ARID1A	sp|O14497|ARI1A_HUMAN AT-rich interactive domain-containing protein 1A OS=Homo sapiens GN=ARID1A PE=1 SV=3	2	10	10	10	1	3	1	1	2	2	4	5	6	2	0	1	4	0	3	0	1	3	1	1	2	2	4	5	6	2	0	1	4	0	3	0	1	3	1	1	2	2
O14523	O14523	2	2	2	C2 domain-containing protein 2-like	C2CD2L	sp|O14523|C2C2L_HUMAN C2 domain-containing protein 2-like OS=Homo sapiens GN=C2CD2L PE=1 SV=3	1	2	2	2	0	0	1	1	0	0	1	0	0	0	0	0	0	0	0	0	0	0	1	1	0	0	1	0	0	0	0	0	0	0	0	0	0	0	1	1	0	0
O14530	O14530	2	2	2	Thioredoxin domain-containing protein 9	TXNDC9	sp|O14530|TXND9_HUMAN Thioredoxin domain-containing protein 9 OS=Homo sapiens GN=TXNDC9 PE=1 SV=2	1	2	2	2	1	2	1	1	0	2	2	1	1	2	1	0	1	1	0	0	1	2	1	1	0	2	2	1	1	2	1	0	1	1	0	0	1	2	1	1	0	2
O14548	O14548	1	1	1	Cytochrome c oxidase subunit 7A-related protein, mitochondrial	COX7A2L	sp|O14548|COX7R_HUMAN Cytochrome c oxidase subunit 7A-related protein, mitochondrial OS=Homo sapiens GN=COX7A2L PE=1 SV=2	1	1	1	1	0	0	0	0	0	0	1	1	0	0	0	0	0	0	0	0	0	0	0	0	0	0	1	1	0	0	0	0	0	0	0	0	0	0	0	0	0	0
O14578	O14578	4	4	4	Citron Rho-interacting kinase	CIT	sp|O14578|CTRO_HUMAN Citron Rho-interacting kinase OS=Homo sapiens GN=CIT PE=1 SV=2	1	4	4	4	0	1	0	0	0	0	2	2	2	2	0	0	0	1	0	0	0	1	0	0	0	0	2	2	2	2	0	0	0	1	0	0	0	1	0	0	0	0
O14579	O14579	5	5	5	Coatomer subunit epsilon	COPE	sp|O14579|COPE_HUMAN Coatomer subunit epsilon OS=Homo sapiens GN=COPE PE=1 SV=3	1	5	5	5	1	2	3	3	1	1	2	4	4	2	2	1	1	2	1	2	1	2	3	3	1	1	2	4	4	2	2	1	1	2	1	2	1	2	3	3	1	1
P47813;O14602	P47813;O14602	1;1	1;1	1;1	Eukaryotic translation initiation factor 1A, X-chromosomal;Eukaryotic translation initiation factor 1A, Y-chromosomal	EIF1AX;EIF1AY	sp|P47813|IF1AX_HUMAN Eukaryotic translation initiation factor 1A, X-chromosomal OS=Homo sapiens GN=EIF1AX PE=1 SV=2;sp|O14602|IF1AY_HUMAN Eukaryotic translation initiation factor 1A, Y-chromosomal OS=Homo sapiens GN=EIF1AY PE=1 SV=4	2	1	1	1	1	1	1	1	1	1	1	0	1	1	1	1	1	0	1	0	1	1	1	1	1	1	1	0	1	1	1	1	1	0	1	0	1	1	1	1	1	1
O14613	O14613	2	2	2	Cdc42 effector protein 2	CDC42EP2	sp|O14613|BORG1_HUMAN Cdc42 effector protein 2 OS=Homo sapiens GN=CDC42EP2 PE=1 SV=1	1	2	2	2	2	1	2	1	0	0	1	0	1	1	0	0	1	0	0	0	2	1	2	1	0	0	1	0	1	1	0	0	1	0	0	0	2	1	2	1	0	0
O14617	O14617	7	7	7	AP-3 complex subunit delta-1	AP3D1	sp|O14617|AP3D1_HUMAN AP-3 complex subunit delta-1 OS=Homo sapiens GN=AP3D1 PE=1 SV=1	1	7	7	7	0	3	2	1	2	2	3	4	3	3	1	2	1	2	2	2	0	3	2	1	2	2	3	4	3	3	1	2	1	2	2	2	0	3	2	1	2	2
O14639	O14639	2	2	2	Actin-binding LIM protein 1	ABLIM1	sp|O14639|ABLM1_HUMAN Actin-binding LIM protein 1 OS=Homo sapiens GN=ABLIM1 PE=1 SV=3	1	2	2	2	0	0	1	0	0	0	0	0	2	0	0	0	1	1	0	0	0	0	1	0	0	0	0	0	2	0	0	0	1	1	0	0	0	0	1	0	0	0
O14646	O14646	10	10	9	Chromodomain-helicase-DNA-binding protein 1	CHD1	sp|O14646|CHD1_HUMAN Chromodomain-helicase-DNA-binding protein 1 OS=Homo sapiens GN=CHD1 PE=1 SV=2	1	10	10	9	4	4	5	5	2	4	7	7	6	5	4	3	7	2	4	0	4	4	5	5	2	4	7	7	6	5	4	3	7	2	4	0	4	4	5	5	2	4
O14647	O14647	7	6	6	Chromodomain-helicase-DNA-binding protein 2	CHD2	sp|O14647|CHD2_HUMAN Chromodomain-helicase-DNA-binding protein 2 OS=Homo sapiens GN=CHD2 PE=1 SV=2	1	7	6	6	2	0	0	1	1	0	0	2	2	1	0	0	3	0	2	0	2	0	0	1	1	0	0	1	2	1	0	0	2	0	2	0	2	0	0	1	1	0
O14653	O14653	1	1	1	Golgi SNAP receptor complex member 2	GOSR2	sp|O14653|GOSR2_HUMAN Golgi SNAP receptor complex member 2 OS=Homo sapiens GN=GOSR2 PE=1 SV=2	1	1	1	1	1	1	1	1	1	1	0	0	0	0	0	0	0	1	0	0	1	1	1	1	1	1	0	0	0	0	0	0	0	1	0	0	1	1	1	1	1	1
O14672	O14672	8	8	8	Disintegrin and metalloproteinase domain-containing protein 10	ADAM10	sp|O14672|ADA10_HUMAN Disintegrin and metalloproteinase domain-containing protein 10 OS=Homo sapiens GN=ADAM10 PE=1 SV=1	1	8	8	8	1	1	2	3	1	1	3	5	2	3	1	2	3	2	3	1	1	1	2	3	1	1	3	5	2	3	1	2	3	2	3	1	1	1	2	3	1	1
O14678	O14678	2	2	2	ATP-binding cassette sub-family D member 4	ABCD4	sp|O14678|ABCD4_HUMAN ATP-binding cassette sub-family D member 4 OS=Homo sapiens GN=ABCD4 PE=1 SV=1	1	2	2	2	2	1	2	2	1	0	0	1	1	0	1	2	0	1	1	0	2	1	2	2	1	0	0	1	1	0	1	2	0	1	1	0	2	1	2	2	1	0
O14686	O14686	1	1	1	Histone-lysine N-methyltransferase 2D	KMT2D	sp|O14686|KMT2D_HUMAN Histone-lysine N-methyltransferase 2D OS=Homo sapiens GN=KMT2D PE=1 SV=2	1	1	1	1	0	0	0	0	0	0	0	0	1	0	0	0	0	0	0	0	0	0	0	0	0	0	0	0	1	0	0	0	0	0	0	0	0	0	0	0	0	0
O14715;Q99666	O14715;Q99666	9;8	3;3	2;2	RANBP2-like and GRIP domain-containing protein 8;RANBP2-like and GRIP domain-containing protein 5/6	RGPD8;RGPD5	sp|O14715|RGPD8_HUMAN RANBP2-like and GRIP domain-containing protein 8 OS=Homo sapiens GN=RGPD8 PE=1 SV=2;sp|Q99666|RGPD5_HUMAN RANBP2-like and GRIP domain-containing protein 5/6 OS=Homo sapiens GN=RGPD5 PE=1 SV=3	2	9	3	2	0	1	1	4	0	0	2	4	3	2	1	0	0	3	1	0	0	0	0	2	0	0	0	0	0	0	0	0	0	1	0	0	0	0	0	1	0	0
O14730	O14730	2	2	2	Serine/threonine-protein kinase RIO3	RIOK3	sp|O14730|RIOK3_HUMAN Serine/threonine-protein kinase RIO3 OS=Homo sapiens GN=RIOK3 PE=1 SV=2	1	2	2	2	0	0	1	0	0	0	1	1	2	2	0	0	0	0	0	0	0	0	1	0	0	0	1	1	2	2	0	0	0	0	0	0	0	0	1	0	0	0
O14744	O14744	9	9	9	Protein arginine N-methyltransferase 5;Protein arginine N-methyltransferase 5, N-terminally processed	PRMT5	sp|O14744|ANM5_HUMAN Protein arginine N-methyltransferase 5 OS=Homo sapiens GN=PRMT5 PE=1 SV=4	1	9	9	9	5	3	3	2	4	4	6	6	6	7	3	3	6	6	4	0	5	3	3	2	4	4	6	6	6	7	3	3	6	6	4	0	5	3	3	2	4	4
O14745	O14745	1	1	1	Na(+)/H(+) exchange regulatory cofactor NHE-RF1	SLC9A3R1	sp|O14745|NHRF1_HUMAN Na(+)/H(+) exchange regulatory cofactor NHE-RF1 OS=Homo sapiens GN=SLC9A3R1 PE=1 SV=4	1	1	1	1	0	1	0	0	0	1	1	1	1	1	1	1	1	1	1	0	0	1	0	0	0	1	1	1	1	1	1	1	1	1	1	0	0	1	0	0	0	1
O14773	O14773	4	4	4	Tripeptidyl-peptidase 1	TPP1	sp|O14773|TPP1_HUMAN Tripeptidyl-peptidase 1 OS=Homo sapiens GN=TPP1 PE=1 SV=2	1	4	4	4	1	1	2	3	0	1	2	3	2	1	2	2	2	2	1	0	1	1	2	3	0	1	2	3	2	1	2	2	2	2	1	0	1	1	2	3	0	1
O14776	O14776	4	4	4	Transcription elongation regulator 1	TCERG1	sp|O14776|TCRG1_HUMAN Transcription elongation regulator 1 OS=Homo sapiens GN=TCERG1 PE=1 SV=2	1	4	4	4	2	3	2	2	2	2	2	0	1	3	0	2	2	0	0	1	2	3	2	2	2	2	2	0	1	3	0	2	2	0	0	1	2	3	2	2	2	2
O14777	O14777	4	4	4	Kinetochore protein NDC80 homolog	NDC80	sp|O14777|NDC80_HUMAN Kinetochore protein NDC80 homolog OS=Homo sapiens GN=NDC80 PE=1 SV=1	1	4	4	4	1	3	3	1	0	2	2	3	2	2	0	0	2	0	1	0	1	3	3	1	0	2	2	3	2	2	0	0	2	0	1	0	1	3	3	1	0	2
O14786	O14786	7	7	7	Neuropilin-1	NRP1	sp|O14786|NRP1_HUMAN Neuropilin-1 OS=Homo sapiens GN=NRP1 PE=1 SV=3	1	7	7	7	2	2	4	5	0	0	4	3	4	2	0	1	1	0	2	0	2	2	4	5	0	0	4	3	4	2	0	1	1	0	2	0	2	2	4	5	0	0
O14787	O14787	12	9	9	Transportin-2	TNPO2	sp|O14787|TNPO2_HUMAN Transportin-2 OS=Homo sapiens GN=TNPO2 PE=1 SV=3	1	12	9	9	4	2	3	2	2	0	4	7	5	4	0	1	2	5	2	5	4	2	2	1	1	0	3	4	4	3	0	0	1	4	2	3	4	2	2	1	1	0
O14817	O14817	2	2	2	Tetraspanin-4	TSPAN4	sp|O14817|TSN4_HUMAN Tetraspanin-4 OS=Homo sapiens GN=TSPAN4 PE=1 SV=1	1	2	2	2	1	1	2	2	0	1	2	2	2	2	2	1	2	1	2	0	1	1	2	2	0	1	2	2	2	2	2	1	2	1	2	0	1	1	2	2	0	1
O14818;Q8TAA3	O14818;Q8TAA3	2;1	2;1	2;1	Proteasome subunit alpha type-7;Proteasome subunit alpha type-7-like	PSMA7;PSMA8	sp|O14818|PSA7_HUMAN Proteasome subunit alpha type-7 OS=Homo sapiens GN=PSMA7 PE=1 SV=1;sp|Q8TAA3|PSA7L_HUMAN Proteasome subunit alpha type-7-like OS=Homo sapiens GN=PSMA8 PE=2 SV=3	2	2	2	2	1	1	1	1	1	1	2	2	2	1	1	1	1	2	1	0	1	1	1	1	1	1	2	2	2	1	1	1	1	2	1	0	1	1	1	1	1	1
O14828	O14828	4	4	4	Secretory carrier-associated membrane protein 3	SCAMP3	sp|O14828|SCAM3_HUMAN Secretory carrier-associated membrane protein 3 OS=Homo sapiens GN=SCAMP3 PE=1 SV=3	1	4	4	4	2	4	3	2	2	1	1	2	2	3	0	1	2	1	2	0	2	4	3	2	2	1	1	2	2	3	0	1	2	1	2	0	2	4	3	2	2	1
O14880	O14880	1	1	1	Microsomal glutathione S-transferase 3	MGST3	sp|O14880|MGST3_HUMAN Microsomal glutathione S-transferase 3 OS=Homo sapiens GN=MGST3 PE=1 SV=1	1	1	1	1	1	1	1	1	1	1	1	1	1	1	1	1	1	1	1	0	1	1	1	1	1	1	1	1	1	1	1	1	1	1	1	0	1	1	1	1	1	1
O14893	O14893	5	5	5	Gem-associated protein 2	GEMIN2	sp|O14893|GEMI2_HUMAN Gem-associated protein 2 OS=Homo sapiens GN=GEMIN2 PE=1 SV=1	1	5	5	5	1	2	2	2	2	1	3	1	2	2	2	0	2	2	2	1	1	2	2	2	2	1	3	1	2	2	2	0	2	2	2	1	1	2	2	2	2	1
O14908	O14908	2	2	2	PDZ domain-containing protein GIPC1	GIPC1	sp|O14908|GIPC1_HUMAN PDZ domain-containing protein GIPC1 OS=Homo sapiens GN=GIPC1 PE=1 SV=2	1	2	2	2	0	0	0	0	1	1	1	2	1	2	0	0	2	2	2	0	0	0	0	0	1	1	1	2	1	2	0	0	2	2	2	0	0	0	0	0	1	1
O14925;Q5SRD1	O14925;Q5SRD1	2;2	2;2	2;2	Mitochondrial import inner membrane translocase subunit Tim23;Putative mitochondrial import inner membrane translocase subunit Tim23B	TIMM23;TIMM23B	sp|O14925|TIM23_HUMAN Mitochondrial import inner membrane translocase subunit Tim23 OS=Homo sapiens GN=TIMM23 PE=1 SV=1;sp|Q5SRD1|TI23B_HUMAN Putative mitochondrial import inner membrane translocase subunit Tim23B OS=Homo sapiens GN=TIMM23B PE=5 SV=2	2	2	2	2	2	2	2	2	1	1	2	2	2	2	0	2	2	1	1	1	2	2	2	2	1	1	2	2	2	2	0	2	2	1	1	1	2	2	2	2	1	1
O14929	O14929	6	6	6	Histone acetyltransferase type B catalytic subunit	HAT1	sp|O14929|HAT1_HUMAN Histone acetyltransferase type B catalytic subunit OS=Homo sapiens GN=HAT1 PE=1 SV=1	1	6	6	6	5	5	5	4	2	3	5	3	3	5	3	3	3	2	2	1	5	5	5	4	2	3	5	3	3	5	3	3	3	2	2	1	5	5	5	4	2	3
O14936	O14936	4	4	4	Peripheral plasma membrane protein CASK	CASK	sp|O14936|CSKP_HUMAN Peripheral plasma membrane protein CASK OS=Homo sapiens GN=CASK PE=1 SV=3	1	4	4	4	2	3	1	2	1	1	2	1	1	2	1	1	0	0	0	0	2	3	1	2	1	1	2	1	1	2	1	1	0	0	0	0	2	3	1	2	1	1
O14950	O14950	4	4	1	Myosin regulatory light chain 12B	MYL12B	sp|O14950|ML12B_HUMAN Myosin regulatory light chain 12B OS=Homo sapiens GN=MYL12B PE=1 SV=2	1	4	4	1	4	4	4	4	3	4	4	3	3	4	3	3	3	3	2	2	4	4	4	4	3	4	4	3	3	4	3	3	3	3	2	2	1	1	1	1	0	1
O14964	O14964	2	2	2	Hepatocyte growth factor-regulated tyrosine kinase substrate	HGS	sp|O14964|HGS_HUMAN Hepatocyte growth factor-regulated tyrosine kinase substrate OS=Homo sapiens GN=HGS PE=1 SV=1	1	2	2	2	1	0	0	0	0	0	0	2	0	0	0	0	0	1	0	0	1	0	0	0	0	0	0	2	0	0	0	0	0	1	0	0	1	0	0	0	0	0
O14965	O14965	1	1	1	Aurora kinase A	AURKA	sp|O14965|AURKA_HUMAN Aurora kinase A OS=Homo sapiens GN=AURKA PE=1 SV=2	1	1	1	1	1	0	1	0	0	1	1	1	1	1	1	0	0	1	0	0	1	0	1	0	0	1	1	1	1	1	1	0	0	1	0	0	1	0	1	0	0	1
O14966	O14966	2	2	2	Ras-related protein Rab-7L1	RAB29	sp|O14966|RAB7L_HUMAN Ras-related protein Rab-7L1 OS=Homo sapiens GN=RAB29 PE=1 SV=1	1	2	2	2	0	0	1	1	0	0	1	2	0	0	0	0	1	0	1	0	0	0	1	1	0	0	1	2	0	0	0	0	1	0	1	0	0	0	1	1	0	0
O14967	O14967	6	6	6	Calmegin	CLGN	sp|O14967|CLGN_HUMAN Calmegin OS=Homo sapiens GN=CLGN PE=1 SV=1	1	6	6	6	3	3	4	5	3	2	5	5	3	4	3	3	4	6	3	1	3	3	4	5	3	2	5	5	3	4	3	3	4	6	3	1	3	3	4	5	3	2
O14972	O14972	2	2	2	Down syndrome critical region protein 3	DSCR3	sp|O14972|DSCR3_HUMAN Down syndrome critical region protein 3 OS=Homo sapiens GN=DSCR3 PE=2 SV=1	1	2	2	2	0	1	0	0	2	0	1	0	1	0	0	1	0	0	1	0	0	1	0	0	2	0	1	0	1	0	0	1	0	0	1	0	0	1	0	0	2	0
O14974	O14974	4	4	4	Protein phosphatase 1 regulatory subunit 12A	PPP1R12A	sp|O14974|MYPT1_HUMAN Protein phosphatase 1 regulatory subunit 12A OS=Homo sapiens GN=PPP1R12A PE=1 SV=1	1	4	4	4	1	1	3	1	0	2	1	1	2	2	1	1	3	2	2	0	1	1	3	1	0	2	1	1	2	2	1	1	3	2	2	0	1	1	3	1	0	2
O14976	O14976	3	3	3	Cyclin-G-associated kinase	GAK	sp|O14976|GAK_HUMAN Cyclin-G-associated kinase OS=Homo sapiens GN=GAK PE=1 SV=2	1	3	3	3	1	2	0	0	0	0	1	0	2	1	0	1	0	0	0	0	1	2	0	0	0	0	1	0	2	1	0	1	0	0	0	0	1	2	0	0	0	0
O14979	O14979	2	2	2	Heterogeneous nuclear ribonucleoprotein D-like	HNRNPDL	sp|O14979|HNRDL_HUMAN Heterogeneous nuclear ribonucleoprotein D-like OS=Homo sapiens GN=HNRNPDL PE=1 SV=3	1	2	2	2	2	2	1	2	1	1	2	2	2	2	1	1	2	1	1	1	2	2	1	2	1	1	2	2	2	2	1	1	2	1	1	1	2	2	1	2	1	1
O14980	O14980	14	14	14	Exportin-1	XPO1	sp|O14980|XPO1_HUMAN Exportin-1 OS=Homo sapiens GN=XPO1 PE=1 SV=1	1	14	14	14	10	9	7	6	4	8	10	10	9	8	5	5	9	7	5	3	10	9	7	6	4	8	10	10	9	8	5	5	9	7	5	3	10	9	7	6	4	8
O14981	O14981	7	7	7	TATA-binding protein-associated factor 172	BTAF1	sp|O14981|BTAF1_HUMAN TATA-binding protein-associated factor 172 OS=Homo sapiens GN=BTAF1 PE=1 SV=2	1	7	7	7	1	0	2	1	0	0	3	0	3	5	0	0	0	0	1	0	1	0	2	1	0	0	3	0	3	5	0	0	0	0	1	0	1	0	2	1	0	0
O15013	O15013	4	4	4	Rho guanine nucleotide exchange factor 10	ARHGEF10	sp|O15013|ARHGA_HUMAN Rho guanine nucleotide exchange factor 10 OS=Homo sapiens GN=ARHGEF10 PE=1 SV=4	1	4	4	4	2	3	2	1	1	0	1	2	3	2	0	1	1	2	0	0	2	3	2	1	1	0	1	2	3	2	0	1	1	2	0	0	2	3	2	1	1	0
O15027	O15027	14	14	14	Protein transport protein Sec16A	SEC16A	sp|O15027|SC16A_HUMAN Protein transport protein Sec16A OS=Homo sapiens GN=SEC16A PE=1 SV=3	1	14	14	14	3	5	4	5	2	0	5	6	7	7	2	2	4	2	5	0	3	5	4	5	2	0	5	6	7	7	2	2	4	2	5	0	3	5	4	5	2	0
O15031	O15031	15	15	15	Plexin-B2	PLXNB2	sp|O15031|PLXB2_HUMAN Plexin-B2 OS=Homo sapiens GN=PLXNB2 PE=1 SV=3	1	15	15	15	7	2	6	7	5	5	10	8	9	5	2	5	7	7	3	1	7	2	6	7	5	5	10	8	9	5	2	5	7	7	3	1	7	2	6	7	5	5
O15042	O15042	4	4	4	U2 snRNP-associated SURP motif-containing protein	U2SURP	sp|O15042|SR140_HUMAN U2 snRNP-associated SURP motif-containing protein OS=Homo sapiens GN=U2SURP PE=1 SV=2	1	4	4	4	0	0	1	0	0	0	1	2	1	2	0	0	1	1	1	1	0	0	1	0	0	0	1	2	1	2	0	0	1	1	1	1	0	0	1	0	0	0
O15047	O15047	1	1	1	Histone-lysine N-methyltransferase SETD1A	SETD1A	sp|O15047|SET1A_HUMAN Histone-lysine N-methyltransferase SETD1A OS=Homo sapiens GN=SETD1A PE=1 SV=3	1	1	1	1	0	1	1	1	0	0	1	0	1	1	0	0	0	0	1	0	0	1	1	1	0	0	1	0	1	1	0	0	0	0	1	0	0	1	1	1	0	0
O15061	O15061	5	5	5	Synemin	SYNM	sp|O15061|SYNEM_HUMAN Synemin OS=Homo sapiens GN=SYNM PE=1 SV=2	1	5	5	5	2	2	0	3	2	1	3	0	3	4	1	2	2	0	2	0	2	2	0	3	2	1	3	0	3	4	1	2	2	0	2	0	2	2	0	3	2	1
O15063	O15063	1	1	1	Uncharacterized protein KIAA0355	KIAA0355	sp|O15063|K0355_HUMAN Uncharacterized protein KIAA0355 OS=Homo sapiens GN=KIAA0355 PE=1 SV=2	1	1	1	1	0	0	0	1	0	0	1	0	0	1	0	0	0	0	0	0	0	0	0	1	0	0	1	0	0	1	0	0	0	0	0	0	0	0	0	1	0	0
O15066	O15066	3	3	3	Kinesin-like protein KIF3B;Kinesin-like protein KIF3B, N-terminally processed	KIF3B	sp|O15066|KIF3B_HUMAN Kinesin-like protein KIF3B OS=Homo sapiens GN=KIF3B PE=1 SV=1	1	3	3	3	1	1	0	1	0	1	0	1	1	2	0	0	0	0	0	0	1	1	0	1	0	1	0	1	1	2	0	0	0	0	0	0	1	1	0	1	0	1
O15067	O15067	12	12	12	Phosphoribosylformylglycinamidine synthase	PFAS	sp|O15067|PUR4_HUMAN Phosphoribosylformylglycinamidine synthase OS=Homo sapiens GN=PFAS PE=1 SV=4	1	12	12	12	3	3	3	7	1	2	6	3	7	5	2	3	7	5	4	0	3	3	3	7	1	2	6	3	7	5	2	3	7	5	4	0	3	3	3	7	1	2
O15084	O15084	7	7	7	Serine/threonine-protein phosphatase 6 regulatory ankyrin repeat subunit A	ANKRD28	sp|O15084|ANR28_HUMAN Serine/threonine-protein phosphatase 6 regulatory ankyrin repeat subunit A OS=Homo sapiens GN=ANKRD28 PE=1 SV=5	1	7	7	7	2	1	0	2	0	0	2	1	1	3	0	1	1	0	1	0	2	1	0	2	0	0	2	1	1	3	0	1	1	0	1	0	2	1	0	2	0	0
O15085	O15085	2	2	2	Rho guanine nucleotide exchange factor 11	ARHGEF11	sp|O15085|ARHGB_HUMAN Rho guanine nucleotide exchange factor 11 OS=Homo sapiens GN=ARHGEF11 PE=1 SV=1	1	2	2	2	0	0	0	0	0	0	0	0	0	2	0	0	0	0	0	0	0	0	0	0	0	0	0	0	0	2	0	0	0	0	0	0	0	0	0	0	0	0
O15091	O15091	1	1	1	Mitochondrial ribonuclease P protein 3	KIAA0391	sp|O15091|MRRP3_HUMAN Mitochondrial ribonuclease P protein 3 OS=Homo sapiens GN=KIAA0391 PE=1 SV=2	1	1	1	1	0	0	1	1	0	0	0	0	1	1	0	0	0	0	0	0	0	0	1	1	0	0	0	0	1	1	0	0	0	0	0	0	0	0	1	1	0	0
O15111	O15111	3	3	3	Inhibitor of nuclear factor kappa-B kinase subunit alpha	CHUK	sp|O15111|IKKA_HUMAN Inhibitor of nuclear factor kappa-B kinase subunit alpha OS=Homo sapiens GN=CHUK PE=1 SV=2	1	3	3	3	1	0	0	0	0	0	2	1	0	0	0	0	0	1	0	0	1	0	0	0	0	0	2	1	0	0	0	0	0	1	0	0	1	0	0	0	0	0
O15116	O15116	1	1	1	U6 snRNA-associated Sm-like protein LSm1	LSM1	sp|O15116|LSM1_HUMAN U6 snRNA-associated Sm-like protein LSm1 OS=Homo sapiens GN=LSM1 PE=1 SV=1	1	1	1	1	0	0	0	0	0	0	0	0	0	0	0	0	0	1	0	0	0	0	0	0	0	0	0	0	0	0	0	0	0	1	0	0	0	0	0	0	0	0
O15118	O15118	5	5	5	Niemann-Pick C1 protein	NPC1	sp|O15118|NPC1_HUMAN Niemann-Pick C1 protein OS=Homo sapiens GN=NPC1 PE=1 SV=2	1	5	5	5	1	1	2	3	1	1	2	2	3	1	1	1	2	3	2	0	1	1	2	3	1	1	2	2	3	1	1	1	2	3	2	0	1	1	2	3	1	1
O15119	O15119	1	1	1	T-box transcription factor TBX3	TBX3	sp|O15119|TBX3_HUMAN T-box transcription factor TBX3 OS=Homo sapiens GN=TBX3 PE=1 SV=4	1	1	1	1	0	0	0	0	0	0	0	1	0	0	0	0	1	0	0	0	0	0	0	0	0	0	0	1	0	0	0	0	1	0	0	0	0	0	0	0	0	0
O15120	O15120	1	1	1	1-acyl-sn-glycerol-3-phosphate acyltransferase beta	AGPAT2	sp|O15120|PLCB_HUMAN 1-acyl-sn-glycerol-3-phosphate acyltransferase beta OS=Homo sapiens GN=AGPAT2 PE=1 SV=1	1	1	1	1	0	0	0	1	0	0	0	1	0	0	0	0	0	1	0	0	0	0	0	1	0	0	0	1	0	0	0	0	0	1	0	0	0	0	0	1	0	0
O15121	O15121	3	3	3	Sphingolipid delta(4)-desaturase DES1	DEGS1	sp|O15121|DEGS1_HUMAN Sphingolipid delta(4)-desaturase DES1 OS=Homo sapiens GN=DEGS1 PE=1 SV=1	1	3	3	3	0	0	0	0	0	0	0	1	0	0	0	0	0	2	0	0	0	0	0	0	0	0	0	1	0	0	0	0	0	2	0	0	0	0	0	0	0	0
O15126	O15126	4	4	4	Secretory carrier-associated membrane protein 1	SCAMP1	sp|O15126|SCAM1_HUMAN Secretory carrier-associated membrane protein 1 OS=Homo sapiens GN=SCAMP1 PE=1 SV=2	1	4	4	4	1	1	0	2	2	1	3	2	2	2	2	2	1	2	2	0	1	1	0	2	2	1	3	2	2	2	2	2	1	2	2	0	1	1	0	2	2	1
O15127	O15127	3	3	3	Secretory carrier-associated membrane protein 2	SCAMP2	sp|O15127|SCAM2_HUMAN Secretory carrier-associated membrane protein 2 OS=Homo sapiens GN=SCAMP2 PE=1 SV=2	1	3	3	3	2	2	1	2	1	2	3	1	0	2	0	2	2	1	2	1	2	2	1	2	1	2	3	1	0	2	0	2	2	1	2	1	2	2	1	2	1	2
O15143	O15143	8	8	7	Actin-related protein 2/3 complex subunit 1B	ARPC1B	sp|O15143|ARC1B_HUMAN Actin-related protein 2/3 complex subunit 1B OS=Homo sapiens GN=ARPC1B PE=1 SV=3	1	8	8	7	3	2	1	2	1	1	3	4	1	2	1	1	1	2	0	1	3	2	1	2	1	1	3	4	1	2	1	1	1	2	0	1	2	2	1	2	0	0
O15144	O15144	3	3	3	Actin-related protein 2/3 complex subunit 2	ARPC2	sp|O15144|ARPC2_HUMAN Actin-related protein 2/3 complex subunit 2 OS=Homo sapiens GN=ARPC2 PE=1 SV=1	1	3	3	3	3	3	1	2	1	1	3	3	3	3	1	1	1	2	1	1	3	3	1	2	1	1	3	3	3	3	1	1	1	2	1	1	3	3	1	2	1	1
O15145	O15145	1	1	1	Actin-related protein 2/3 complex subunit 3	ARPC3	sp|O15145|ARPC3_HUMAN Actin-related protein 2/3 complex subunit 3 OS=Homo sapiens GN=ARPC3 PE=1 SV=3	1	1	1	1	1	1	1	1	1	1	1	1	1	1	1	1	1	1	1	0	1	1	1	1	1	1	1	1	1	1	1	1	1	1	1	0	1	1	1	1	1	1
O15155	O15155	3	3	3	BET1 homolog	BET1	sp|O15155|BET1_HUMAN BET1 homolog OS=Homo sapiens GN=BET1 PE=1 SV=1	1	3	3	3	2	1	0	1	2	1	2	0	2	0	1	1	0	1	1	0	2	1	0	1	2	1	2	0	2	0	1	1	0	1	1	0	2	1	0	1	2	1
O15160	O15160	5	5	5	DNA-directed RNA polymerases I and III subunit RPAC1	POLR1C	sp|O15160|RPAC1_HUMAN DNA-directed RNA polymerases I and III subunit RPAC1 OS=Homo sapiens GN=POLR1C PE=1 SV=1	1	5	5	5	4	3	3	4	2	2	2	2	3	2	1	2	3	2	4	1	4	3	3	4	2	2	2	2	3	2	1	2	3	2	4	1	4	3	3	4	2	2
O15162	O15162	1	1	1	Phospholipid scramblase 1	PLSCR1	sp|O15162|PLS1_HUMAN Phospholipid scramblase 1 OS=Homo sapiens GN=PLSCR1 PE=1 SV=1	1	1	1	1	1	1	0	0	0	1	0	1	1	1	1	1	0	0	1	1	1	1	0	0	0	1	0	1	1	1	1	1	0	0	1	1	1	1	0	0	0	1
O15164	O15164	2	2	2	Transcription intermediary factor 1-alpha	TRIM24	sp|O15164|TIF1A_HUMAN Transcription intermediary factor 1-alpha OS=Homo sapiens GN=TRIM24 PE=1 SV=3	1	2	2	2	0	0	1	0	0	1	0	0	0	1	0	0	0	0	0	0	0	0	1	0	0	1	0	0	0	1	0	0	0	0	0	0	0	0	1	0	0	1
O15173	O15173	4	4	4	Membrane-associated progesterone receptor component 2	PGRMC2	sp|O15173|PGRC2_HUMAN Membrane-associated progesterone receptor component 2 OS=Homo sapiens GN=PGRMC2 PE=1 SV=1	1	4	4	4	1	1	3	3	2	3	0	1	1	1	2	3	2	1	2	0	1	1	3	3	2	3	0	1	1	1	2	3	2	1	2	0	1	1	3	3	2	3
O15182	O15182	1	1	1	Centrin-3	CETN3	sp|O15182|CETN3_HUMAN Centrin-3 OS=Homo sapiens GN=CETN3 PE=1 SV=2	1	1	1	1	1	1	1	1	1	1	1	0	0	1	0	1	1	1	1	0	1	1	1	1	1	1	1	0	0	1	0	1	1	1	1	0	1	1	1	1	1	1
O15213	O15213	2	2	2	WD repeat-containing protein 46	WDR46	sp|O15213|WDR46_HUMAN WD repeat-containing protein 46 OS=Homo sapiens GN=WDR46 PE=1 SV=3	1	2	2	2	0	1	1	1	1	1	1	1	1	2	2	2	1	1	0	0	0	1	1	1	1	1	1	1	1	2	2	2	1	1	0	0	0	1	1	1	1	1
O15226	O15226	2	2	2	NF-kappa-B-repressing factor	NKRF	sp|O15226|NKRF_HUMAN NF-kappa-B-repressing factor OS=Homo sapiens GN=NKRF PE=1 SV=2	1	2	2	2	0	0	2	0	1	1	2	0	1	0	1	1	1	1	1	0	0	0	2	0	1	1	2	0	1	0	1	1	1	1	1	0	0	0	2	0	1	1
O15228	O15228	3	3	3	Dihydroxyacetone phosphate acyltransferase	GNPAT	sp|O15228|GNPAT_HUMAN Dihydroxyacetone phosphate acyltransferase OS=Homo sapiens GN=GNPAT PE=1 SV=1	1	3	3	3	1	1	0	1	0	1	2	3	1	0	0	1	1	1	1	0	1	1	0	1	0	1	2	3	1	0	0	1	1	1	1	0	1	1	0	1	0	1
O15231	O15231	5	5	5	Zinc finger protein 185	ZNF185	sp|O15231|ZN185_HUMAN Zinc finger protein 185 OS=Homo sapiens GN=ZNF185 PE=1 SV=3	1	5	5	5	5	3	5	5	3	3	4	4	5	4	3	4	5	3	4	0	5	3	5	5	3	3	4	4	5	4	3	4	5	3	4	0	5	3	5	5	3	3
O15234	O15234	2	2	2	Protein CASC3	CASC3	sp|O15234|CASC3_HUMAN Protein CASC3 OS=Homo sapiens GN=CASC3 PE=1 SV=2	1	2	2	2	0	1	0	0	0	0	2	0	0	1	0	0	0	0	0	0	0	1	0	0	0	0	2	0	0	1	0	0	0	0	0	0	0	1	0	0	0	0
O15235	O15235	1	1	1	28S ribosomal protein S12, mitochondrial	MRPS12	sp|O15235|RT12_HUMAN 28S ribosomal protein S12, mitochondrial OS=Homo sapiens GN=MRPS12 PE=1 SV=1	1	1	1	1	1	1	1	1	0	0	1	1	1	0	0	0	1	1	1	0	1	1	1	1	0	0	1	1	1	0	0	0	1	1	1	0	1	1	1	1	0	0
O15254	O15254	2	2	2	Peroxisomal acyl-coenzyme A oxidase 3	ACOX3	sp|O15254|ACOX3_HUMAN Peroxisomal acyl-coenzyme A oxidase 3 OS=Homo sapiens GN=ACOX3 PE=1 SV=2	1	2	2	2	1	1	1	2	0	1	1	1	1	1	0	1	0	1	1	0	1	1	1	2	0	1	1	1	1	1	0	1	0	1	1	0	1	1	1	2	0	1
O15260	O15260	2	2	2	Surfeit locus protein 4	SURF4	sp|O15260|SURF4_HUMAN Surfeit locus protein 4 OS=Homo sapiens GN=SURF4 PE=1 SV=3	1	2	2	2	1	1	1	1	1	2	1	1	1	1	2	2	2	2	2	1	1	1	1	1	1	2	1	1	1	1	2	2	2	2	2	1	1	1	1	1	1	2
O15269	O15269	7	7	7	Serine palmitoyltransferase 1	SPTLC1	sp|O15269|SPTC1_HUMAN Serine palmitoyltransferase 1 OS=Homo sapiens GN=SPTLC1 PE=1 SV=1	1	7	7	7	5	3	3	5	0	2	5	2	1	4	1	2	2	5	1	0	5	3	3	5	0	2	5	2	1	4	1	2	2	5	1	0	5	3	3	5	0	2
O15270	O15270	4	4	4	Serine palmitoyltransferase 2	SPTLC2	sp|O15270|SPTC2_HUMAN Serine palmitoyltransferase 2 OS=Homo sapiens GN=SPTLC2 PE=1 SV=1	1	4	4	4	1	1	3	2	2	2	2	2	2	2	1	2	2	1	1	0	1	1	3	2	2	2	2	2	2	2	1	2	2	1	1	0	1	1	3	2	2	2
O15287	O15287	1	1	1	Fanconi anemia group G protein	FANCG	sp|O15287|FANCG_HUMAN Fanconi anemia group G protein OS=Homo sapiens GN=FANCG PE=1 SV=1	1	1	1	1	0	0	0	0	0	0	1	0	1	0	0	0	0	0	0	0	0	0	0	0	0	0	1	0	1	0	0	0	0	0	0	0	0	0	0	0	0	0
O15294	O15294	9	9	9	UDP-N-acetylglucosamine--peptide N-acetylglucosaminyltransferase 110 kDa subunit	OGT	sp|O15294|OGT1_HUMAN UDP-N-acetylglucosamine--peptide N-acetylglucosaminyltransferase 110 kDa subunit OS=Homo sapiens GN=OGT PE=1 SV=3	1	9	9	9	3	3	2	2	0	0	3	7	2	2	0	1	1	4	0	1	3	3	2	2	0	0	3	7	2	2	0	1	1	4	0	1	3	3	2	2	0	0
O15304	O15304	1	1	1	Apoptosis regulatory protein Siva	SIVA1	sp|O15304|SIVA_HUMAN Apoptosis regulatory protein Siva OS=Homo sapiens GN=SIVA1 PE=1 SV=2	1	1	1	1	0	0	0	0	0	0	0	0	1	1	0	0	0	0	0	0	0	0	0	0	0	0	0	0	1	1	0	0	0	0	0	0	0	0	0	0	0	0
O15320;Q96RT6;Q86UF2;A4D2H0	O15320	3;1;1;1	3;1;1;1	3;1;1;1	cTAGE family member 5	CTAGE5	sp|O15320|CTGE5_HUMAN cTAGE family member 5 OS=Homo sapiens GN=CTAGE5 PE=1 SV=4	4	3	3	3	0	1	1	2	1	0	1	0	1	1	0	0	1	1	1	0	0	1	1	2	1	0	1	0	1	1	0	0	1	1	1	0	0	1	1	2	1	0
O15321	O15321	2	2	2	Transmembrane 9 superfamily member 1	TM9SF1	sp|O15321|TM9S1_HUMAN Transmembrane 9 superfamily member 1 OS=Homo sapiens GN=TM9SF1 PE=2 SV=2	1	2	2	2	0	0	2	2	0	0	0	1	1	1	0	0	0	0	1	0	0	0	2	2	0	0	0	1	1	1	0	0	0	0	1	0	0	0	2	2	0	0
O15342	O15342	1	1	1	V-type proton ATPase subunit e 1	ATP6V0E1	sp|O15342|VA0E1_HUMAN V-type proton ATPase subunit e 1 OS=Homo sapiens GN=ATP6V0E1 PE=2 SV=2	1	1	1	1	0	1	0	0	0	0	0	0	0	0	0	0	0	1	1	0	0	1	0	0	0	0	0	0	0	0	0	0	0	1	1	0	0	1	0	0	0	0
O15344	O15344	6	6	6	E3 ubiquitin-protein ligase Midline-1	MID1	sp|O15344|TRI18_HUMAN E3 ubiquitin-protein ligase Midline-1 OS=Homo sapiens GN=MID1 PE=1 SV=1	1	6	6	6	2	2	3	2	2	1	3	3	3	4	1	1	2	3	1	0	2	2	3	2	2	1	3	3	3	4	1	1	2	3	1	0	2	2	3	2	2	1
O15347	O15347	2	2	2	High mobility group protein B3	HMGB3	sp|O15347|HMGB3_HUMAN High mobility group protein B3 OS=Homo sapiens GN=HMGB3 PE=1 SV=4	1	2	2	2	1	2	2	1	1	1	1	1	2	1	1	2	1	0	1	0	1	2	2	1	1	1	1	1	2	1	1	2	1	0	1	0	1	2	2	1	1	1
O15355	O15355	5	5	5	Protein phosphatase 1G	PPM1G	sp|O15355|PPM1G_HUMAN Protein phosphatase 1G OS=Homo sapiens GN=PPM1G PE=1 SV=1	1	5	5	5	2	3	3	4	2	2	3	2	4	2	1	2	5	3	3	0	2	3	3	4	2	2	3	2	4	2	1	2	5	3	3	0	2	3	3	4	2	2
O15357	O15357	3	3	3	Phosphatidylinositol 3,4,5-trisphosphate 5-phosphatase 2	INPPL1	sp|O15357|SHIP2_HUMAN Phosphatidylinositol 3,4,5-trisphosphate 5-phosphatase 2 OS=Homo sapiens GN=INPPL1 PE=1 SV=2	1	3	3	3	2	0	0	0	0	0	0	0	0	0	0	1	0	2	1	0	2	0	0	0	0	0	0	0	0	0	0	1	0	2	1	0	2	0	0	0	0	0
O15360	O15360	3	3	3	Fanconi anemia group A protein	FANCA	sp|O15360|FANCA_HUMAN Fanconi anemia group A protein OS=Homo sapiens GN=FANCA PE=1 SV=2	1	3	3	3	1	1	0	0	0	0	1	0	2	0	0	0	0	0	0	0	1	1	0	0	0	0	1	0	2	0	0	0	0	0	0	0	1	1	0	0	0	0
O15371	O15371	9	9	9	Eukaryotic translation initiation factor 3 subunit D	EIF3D	sp|O15371|EIF3D_HUMAN Eukaryotic translation initiation factor 3 subunit D OS=Homo sapiens GN=EIF3D PE=1 SV=1	1	9	9	9	6	5	5	4	2	2	7	6	6	5	2	3	5	6	2	0	6	5	5	4	2	2	7	6	6	5	2	3	5	6	2	0	6	5	5	4	2	2
O15372	O15372	2	2	2	Eukaryotic translation initiation factor 3 subunit H	EIF3H	sp|O15372|EIF3H_HUMAN Eukaryotic translation initiation factor 3 subunit H OS=Homo sapiens GN=EIF3H PE=1 SV=1	1	2	2	2	1	2	1	0	0	1	1	1	1	1	1	1	0	2	0	1	1	2	1	0	0	1	1	1	1	1	1	1	0	2	0	1	1	2	1	0	0	1
O15379	O15379	1	1	1	Histone deacetylase 3	HDAC3	sp|O15379|HDAC3_HUMAN Histone deacetylase 3 OS=Homo sapiens GN=HDAC3 PE=1 SV=2	1	1	1	1	1	1	1	1	0	0	0	0	0	1	0	0	0	0	0	0	1	1	1	1	0	0	0	0	0	1	0	0	0	0	0	0	1	1	1	1	0	0
O15381	O15381	5	5	5	Nuclear valosin-containing protein-like	NVL	sp|O15381|NVL_HUMAN Nuclear valosin-containing protein-like OS=Homo sapiens GN=NVL PE=1 SV=1	1	5	5	5	0	0	1	1	0	1	1	4	1	1	1	1	2	1	0	0	0	0	1	1	0	1	1	4	1	1	1	1	2	1	0	0	0	0	1	1	0	1
O15392	O15392	2	2	2	Baculoviral IAP repeat-containing protein 5	BIRC5	sp|O15392|BIRC5_HUMAN Baculoviral IAP repeat-containing protein 5 OS=Homo sapiens GN=BIRC5 PE=1 SV=3	1	2	2	2	1	2	1	1	0	0	2	2	1	1	0	0	1	0	0	0	1	2	1	1	0	0	2	2	1	1	0	0	1	0	0	0	1	2	1	1	0	0
O15394	O15394	1	1	1	Neural cell adhesion molecule 2	NCAM2	sp|O15394|NCAM2_HUMAN Neural cell adhesion molecule 2 OS=Homo sapiens GN=NCAM2 PE=1 SV=2	1	1	1	1	0	0	0	0	0	0	0	0	0	1	0	0	0	0	0	0	0	0	0	0	0	0	0	0	0	1	0	0	0	0	0	0	0	0	0	0	0	0
O15397	O15397	3	3	3	Importin-8	IPO8	sp|O15397|IPO8_HUMAN Importin-8 OS=Homo sapiens GN=IPO8 PE=1 SV=2	1	3	3	3	1	0	0	0	0	1	2	2	0	0	0	0	0	1	0	0	1	0	0	0	0	1	2	2	0	0	0	0	0	1	0	0	1	0	0	0	0	1
O15400	O15400	2	2	2	Syntaxin-7	STX7	sp|O15400|STX7_HUMAN Syntaxin-7 OS=Homo sapiens GN=STX7 PE=1 SV=4	1	2	2	2	2	2	2	2	1	1	2	2	2	1	1	1	1	1	1	0	2	2	2	2	1	1	2	2	2	1	1	1	1	1	1	0	2	2	2	2	1	1
O15427	O15427	1	1	1	Monocarboxylate transporter 4	SLC16A3	sp|O15427|MOT4_HUMAN Monocarboxylate transporter 4 OS=Homo sapiens GN=SLC16A3 PE=1 SV=1	1	1	1	1	0	0	0	0	1	0	0	0	0	0	0	1	0	0	0	0	0	0	0	0	1	0	0	0	0	0	0	1	0	0	0	0	0	0	0	0	1	0
O15439	O15439	4	4	4	Multidrug resistance-associated protein 4	ABCC4	sp|O15439|MRP4_HUMAN Multidrug resistance-associated protein 4 OS=Homo sapiens GN=ABCC4 PE=1 SV=3	1	4	4	4	0	1	2	3	0	0	1	3	0	1	1	0	1	0	2	0	0	1	2	3	0	0	1	3	0	1	1	0	1	0	2	0	0	1	2	3	0	0
O15440	O15440	1	1	1	Multidrug resistance-associated protein 5	ABCC5	sp|O15440|MRP5_HUMAN Multidrug resistance-associated protein 5 OS=Homo sapiens GN=ABCC5 PE=1 SV=2	1	1	1	1	1	0	1	1	1	0	0	0	0	0	0	1	0	0	0	0	1	0	1	1	1	0	0	0	0	0	0	1	0	0	0	0	1	0	1	1	1	0
O15446	O15446	7	7	7	DNA-directed RNA polymerase I subunit RPA34	CD3EAP	sp|O15446|RPA34_HUMAN DNA-directed RNA polymerase I subunit RPA34 OS=Homo sapiens GN=CD3EAP PE=1 SV=1	1	7	7	7	5	5	3	5	1	2	3	3	4	4	4	4	5	3	4	0	5	5	3	5	1	2	3	3	4	4	4	4	5	3	4	0	5	5	3	5	1	2
O15460	O15460	2	2	2	Prolyl 4-hydroxylase subunit alpha-2	P4HA2	sp|O15460|P4HA2_HUMAN Prolyl 4-hydroxylase subunit alpha-2 OS=Homo sapiens GN=P4HA2 PE=1 SV=1	1	2	2	2	1	1	1	1	1	1	1	1	1	2	2	2	2	2	2	0	1	1	1	1	1	1	1	1	1	2	2	2	2	2	2	0	1	1	1	1	1	1
O15484	O15484	2	2	2	Calpain-5	CAPN5	sp|O15484|CAN5_HUMAN Calpain-5 OS=Homo sapiens GN=CAPN5 PE=1 SV=2	1	2	2	2	2	1	1	1	0	2	1	0	2	1	2	2	1	0	0	0	2	1	1	1	0	2	1	0	2	1	2	2	1	0	0	0	2	1	1	1	0	2
O15498	O15498	1	1	1	Synaptobrevin homolog YKT6	YKT6	sp|O15498|YKT6_HUMAN Synaptobrevin homolog YKT6 OS=Homo sapiens GN=YKT6 PE=1 SV=1	1	1	1	1	0	1	0	0	0	0	1	1	0	0	0	0	0	1	0	0	0	1	0	0	0	0	1	1	0	0	0	0	0	1	0	0	0	1	0	0	0	0
O15504	O15504	4	4	4	Nucleoporin-like protein 2	NUPL2	sp|O15504|NUPL2_HUMAN Nucleoporin-like protein 2 OS=Homo sapiens GN=NUPL2 PE=1 SV=1	1	4	4	4	0	3	0	0	0	0	2	1	1	1	1	0	0	0	0	0	0	3	0	0	0	0	2	1	1	1	1	0	0	0	0	0	0	3	0	0	0	0
O15511	O15511	2	2	2	Actin-related protein 2/3 complex subunit 5	ARPC5	sp|O15511|ARPC5_HUMAN Actin-related protein 2/3 complex subunit 5 OS=Homo sapiens GN=ARPC5 PE=1 SV=3	1	2	2	2	1	1	1	1	1	1	1	1	1	2	1	1	2	2	1	0	1	1	1	1	1	1	1	1	1	2	1	1	2	2	1	0	1	1	1	1	1	1
O15514	O15514	2	2	2	DNA-directed RNA polymerase II subunit RPB4	POLR2D	sp|O15514|RPB4_HUMAN DNA-directed RNA polymerase II subunit RPB4 OS=Homo sapiens GN=POLR2D PE=1 SV=1	1	2	2	2	1	1	1	1	0	0	1	1	2	2	0	1	0	0	0	0	1	1	1	1	0	0	1	1	2	2	0	1	0	0	0	0	1	1	1	1	0	0
O15523	O15523	5	2	2	ATP-dependent RNA helicase DDX3Y	DDX3Y	sp|O15523|DDX3Y_HUMAN ATP-dependent RNA helicase DDX3Y OS=Homo sapiens GN=DDX3Y PE=1 SV=2	1	5	2	2	1	1	2	1	1	1	3	3	3	3	2	1	2	2	1	0	1	1	2	1	0	0	2	2	1	1	1	0	1	0	0	0	1	1	2	1	0	0
O15533	O15533	1	1	1	Tapasin	TAPBP	sp|O15533|TPSN_HUMAN Tapasin OS=Homo sapiens GN=TAPBP PE=1 SV=1	1	1	1	1	0	0	1	1	1	1	1	1	1	1	1	1	1	0	1	0	0	0	1	1	1	1	1	1	1	1	1	1	1	0	1	0	0	0	1	1	1	1
O15550	O15550	2	2	2	Lysine-specific demethylase 6A	KDM6A	sp|O15550|KDM6A_HUMAN Lysine-specific demethylase 6A OS=Homo sapiens GN=KDM6A PE=1 SV=2	1	2	2	2	0	0	0	1	0	0	2	0	0	1	0	0	0	0	1	0	0	0	0	1	0	0	2	0	0	1	0	0	0	0	1	0	0	0	0	1	0	0
O43143	O43143	9	9	9	Pre-mRNA-splicing factor ATP-dependent RNA helicase DHX15	DHX15	sp|O43143|DHX15_HUMAN Pre-mRNA-splicing factor ATP-dependent RNA helicase DHX15 OS=Homo sapiens GN=DHX15 PE=1 SV=2	1	9	9	9	4	5	5	5	2	4	6	7	6	7	1	1	4	5	2	3	4	5	5	5	2	4	6	7	6	7	1	1	4	5	2	3	4	5	5	5	2	4
O43148	O43148	3	3	3	mRNA cap guanine-N7 methyltransferase	RNMT	sp|O43148|MCES_HUMAN mRNA cap guanine-N7 methyltransferase OS=Homo sapiens GN=RNMT PE=1 SV=1	1	3	3	3	3	1	0	1	1	1	1	2	3	3	0	1	2	1	1	0	3	1	0	1	1	1	1	2	3	3	0	1	2	1	1	0	3	1	0	1	1	1
O43149	O43149	3	3	3	Zinc finger ZZ-type and EF-hand domain-containing protein 1	ZZEF1	sp|O43149|ZZEF1_HUMAN Zinc finger ZZ-type and EF-hand domain-containing protein 1 OS=Homo sapiens GN=ZZEF1 PE=1 SV=6	1	3	3	3	1	1	0	0	0	0	1	0	2	1	0	0	0	0	0	0	1	1	0	0	0	0	1	0	2	1	0	0	0	0	0	0	1	1	0	0	0	0
O43155	O43155	2	2	2	Leucine-rich repeat transmembrane protein FLRT2	FLRT2	sp|O43155|FLRT2_HUMAN Leucine-rich repeat transmembrane protein FLRT2 OS=Homo sapiens GN=FLRT2 PE=1 SV=1	1	2	2	2	2	1	0	2	0	0	1	0	1	1	0	0	1	0	0	0	2	1	0	2	0	0	1	0	1	1	0	0	1	0	0	0	2	1	0	2	0	0
O43156	O43156	5	5	5	TELO2-interacting protein 1 homolog	TTI1	sp|O43156|TTI1_HUMAN TELO2-interacting protein 1 homolog OS=Homo sapiens GN=TTI1 PE=1 SV=3	1	5	5	5	1	3	1	1	1	1	2	3	2	1	0	1	1	2	2	0	1	3	1	1	1	1	2	3	2	1	0	1	1	2	2	0	1	3	1	1	1	1
O43159	O43159	3	3	2	Ribosomal RNA-processing protein 8	RRP8	sp|O43159|RRP8_HUMAN Ribosomal RNA-processing protein 8 OS=Homo sapiens GN=RRP8 PE=1 SV=2	1	3	3	2	1	1	1	2	0	0	1	2	1	1	0	0	2	1	1	1	1	1	1	2	0	0	1	2	1	1	0	0	2	1	1	1	1	1	1	2	0	0
O43166	O43166	2	2	2	Signal-induced proliferation-associated 1-like protein 1	SIPA1L1	sp|O43166|SI1L1_HUMAN Signal-induced proliferation-associated 1-like protein 1 OS=Homo sapiens GN=SIPA1L1 PE=1 SV=4	1	2	2	2	0	1	1	2	0	0	1	0	2	2	0	0	2	0	0	0	0	1	1	2	0	0	1	0	2	2	0	0	2	0	0	0	0	1	1	2	0	0
O43169	O43169	5	5	5	Cytochrome b5 type B	CYB5B	sp|O43169|CYB5B_HUMAN Cytochrome b5 type B OS=Homo sapiens GN=CYB5B PE=1 SV=2	1	5	5	5	2	3	2	3	2	2	3	2	2	1	1	2	3	3	2	1	2	3	2	3	2	2	3	2	2	1	1	2	3	3	2	1	2	3	2	3	2	2
O43172	O43172	4	4	4	U4/U6 small nuclear ribonucleoprotein Prp4	PRPF4	sp|O43172|PRP4_HUMAN U4/U6 small nuclear ribonucleoprotein Prp4 OS=Homo sapiens GN=PRPF4 PE=1 SV=2	1	4	4	4	1	0	2	1	0	0	0	1	2	1	0	0	0	1	0	0	1	0	2	1	0	0	0	1	2	1	0	0	0	1	0	0	1	0	2	1	0	0
O43175	O43175	6	6	6	D-3-phosphoglycerate dehydrogenase	PHGDH	sp|O43175|SERA_HUMAN D-3-phosphoglycerate dehydrogenase OS=Homo sapiens GN=PHGDH PE=1 SV=4	1	6	6	6	2	3	3	3	2	2	5	4	4	4	1	3	3	4	2	2	2	3	3	3	2	2	5	4	4	4	1	3	3	4	2	2	2	3	3	3	2	2
O43181	O43181	1	1	1	NADH dehydrogenase [ubiquinone] iron-sulfur protein 4, mitochondrial	NDUFS4	sp|O43181|NDUS4_HUMAN NADH dehydrogenase [ubiquinone] iron-sulfur protein 4, mitochondrial OS=Homo sapiens GN=NDUFS4 PE=1 SV=1	1	1	1	1	1	1	0	0	0	0	1	1	1	1	1	1	1	0	1	0	1	1	0	0	0	0	1	1	1	1	1	1	1	0	1	0	1	1	0	0	0	0
O43237	O43237	3	3	3	Cytoplasmic dynein 1 light intermediate chain 2	DYNC1LI2	sp|O43237|DC1L2_HUMAN Cytoplasmic dynein 1 light intermediate chain 2 OS=Homo sapiens GN=DYNC1LI2 PE=1 SV=1	1	3	3	3	0	1	1	2	0	0	3	1	2	2	0	0	2	1	0	0	0	1	1	2	0	0	3	1	2	2	0	0	2	1	0	0	0	1	1	2	0	0
O43242	O43242	3	3	3	26S proteasome non-ATPase regulatory subunit 3	PSMD3	sp|O43242|PSMD3_HUMAN 26S proteasome non-ATPase regulatory subunit 3 OS=Homo sapiens GN=PSMD3 PE=1 SV=2	1	3	3	3	2	1	2	3	3	2	3	2	3	3	1	3	3	2	2	1	2	1	2	3	3	2	3	2	3	3	1	3	3	2	2	1	2	1	2	3	3	2
O43251	O43251	2	2	2	RNA binding protein fox-1 homolog 2	RBFOX2	sp|O43251|RFOX2_HUMAN RNA binding protein fox-1 homolog 2 OS=Homo sapiens GN=RBFOX2 PE=1 SV=3	1	2	2	2	2	1	1	0	0	0	1	1	1	1	0	0	1	1	1	0	2	1	1	0	0	0	1	1	1	1	0	0	1	1	1	0	2	1	1	0	0	0
O43252	O43252	4	4	4	Bifunctional 3-phosphoadenosine 5-phosphosulfate synthase 1;Sulfate adenylyltransferase;Adenylyl-sulfate kinase	PAPSS1	sp|O43252|PAPS1_HUMAN Bifunctional 3-phosphoadenosine 5-phosphosulfate synthase 1 OS=Homo sapiens GN=PAPSS1 PE=1 SV=2	1	4	4	4	0	1	1	1	0	0	1	2	1	2	0	0	1	1	0	0	0	1	1	1	0	0	1	2	1	2	0	0	1	1	0	0	0	1	1	1	0	0
O43264	O43264	7	7	7	Centromere/kinetochore protein zw10 homolog	ZW10	sp|O43264|ZW10_HUMAN Centromere/kinetochore protein zw10 homolog OS=Homo sapiens GN=ZW10 PE=1 SV=3	1	7	7	7	6	5	2	3	0	1	4	4	5	5	2	0	2	1	3	2	6	5	2	3	0	1	4	4	5	5	2	0	2	1	3	2	6	5	2	3	0	1
O43290	O43290	5	5	5	U4/U6.U5 tri-snRNP-associated protein 1	SART1	sp|O43290|SNUT1_HUMAN U4/U6.U5 tri-snRNP-associated protein 1 OS=Homo sapiens GN=SART1 PE=1 SV=1	1	5	5	5	4	4	4	4	4	4	2	1	5	3	3	2	4	3	4	0	4	4	4	4	4	4	2	1	5	3	3	2	4	3	4	0	4	4	4	4	4	4
O43292	O43292	1	1	1	Glycosylphosphatidylinositol anchor attachment 1 protein	GPAA1	sp|O43292|GPAA1_HUMAN Glycosylphosphatidylinositol anchor attachment 1 protein OS=Homo sapiens GN=GPAA1 PE=1 SV=3	1	1	1	1	1	1	1	1	1	1	1	1	1	1	0	0	1	1	1	0	1	1	1	1	1	1	1	1	1	1	0	0	1	1	1	0	1	1	1	1	1	1
O43293	O43293	2	2	2	Death-associated protein kinase 3	DAPK3	sp|O43293|DAPK3_HUMAN Death-associated protein kinase 3 OS=Homo sapiens GN=DAPK3 PE=1 SV=1	1	2	2	2	1	2	1	1	0	0	0	0	0	1	0	0	0	0	0	0	1	2	1	1	0	0	0	0	0	1	0	0	0	0	0	0	1	2	1	1	0	0
O43294	O43294	4	4	4	Transforming growth factor beta-1-induced transcript 1 protein	TGFB1I1	sp|O43294|TGFI1_HUMAN Transforming growth factor beta-1-induced transcript 1 protein OS=Homo sapiens GN=TGFB1I1 PE=1 SV=2	1	4	4	4	3	3	4	2	0	2	2	0	3	3	1	2	2	1	2	0	3	3	4	2	0	2	2	0	3	3	1	2	2	1	2	0	3	3	4	2	0	2
O43299	O43299	1	1	1	AP-5 complex subunit zeta-1	AP5Z1	sp|O43299|AP5Z1_HUMAN AP-5 complex subunit zeta-1 OS=Homo sapiens GN=AP5Z1 PE=1 SV=2	1	1	1	1	0	0	0	0	0	0	0	0	0	0	0	0	1	0	0	0	0	0	0	0	0	0	0	0	0	0	0	0	1	0	0	0	0	0	0	0	0	0
O43301	O43301	1	1	1	Heat shock 70 kDa protein 12A	HSPA12A	sp|O43301|HS12A_HUMAN Heat shock 70 kDa protein 12A OS=Homo sapiens GN=HSPA12A PE=1 SV=2	1	1	1	1	0	0	0	0	0	0	0	0	1	1	1	1	0	1	1	0	0	0	0	0	0	0	0	0	1	1	1	1	0	1	1	0	0	0	0	0	0	0
O43306	O43306	1	1	1	Adenylate cyclase type 6	ADCY6	sp|O43306|ADCY6_HUMAN Adenylate cyclase type 6 OS=Homo sapiens GN=ADCY6 PE=1 SV=2	1	1	1	1	0	0	1	0	0	0	0	0	0	0	0	0	0	0	0	0	0	0	1	0	0	0	0	0	0	0	0	0	0	0	0	0	0	0	1	0	0	0
O43310	O43310	2	2	2	CBP80/20-dependent translation initiation factor	CTIF	sp|O43310|CTIF_HUMAN CBP80/20-dependent translation initiation factor OS=Homo sapiens GN=CTIF PE=1 SV=1	1	2	2	2	2	2	2	2	0	0	2	0	2	2	0	0	1	0	0	0	2	2	2	2	0	0	2	0	2	2	0	0	1	0	0	0	2	2	2	2	0	0
O43314	O43314	2	2	2	Inositol hexakisphosphate and diphosphoinositol-pentakisphosphate kinase 2	PPIP5K2	sp|O43314|VIP2_HUMAN Inositol hexakisphosphate and diphosphoinositol-pentakisphosphate kinase 2 OS=Homo sapiens GN=PPIP5K2 PE=1 SV=3	1	2	2	2	1	2	1	0	0	0	1	2	1	1	0	0	0	0	0	0	1	2	1	0	0	0	1	2	1	1	0	0	0	0	0	0	1	2	1	0	0	0
O43318	O43318	1	1	1	Mitogen-activated protein kinase kinase kinase 7	MAP3K7	sp|O43318|M3K7_HUMAN Mitogen-activated protein kinase kinase kinase 7 OS=Homo sapiens GN=MAP3K7 PE=1 SV=1	1	1	1	1	0	1	0	0	0	0	0	0	0	0	0	0	0	0	0	0	0	1	0	0	0	0	0	0	0	0	0	0	0	0	0	0	0	1	0	0	0	0
O43353	O43353	2	2	2	Receptor-interacting serine/threonine-protein kinase 2	RIPK2	sp|O43353|RIPK2_HUMAN Receptor-interacting serine/threonine-protein kinase 2 OS=Homo sapiens GN=RIPK2 PE=1 SV=2	1	2	2	2	1	0	0	0	0	0	0	0	0	1	0	0	0	0	0	0	1	0	0	0	0	0	0	0	0	1	0	0	0	0	0	0	1	0	0	0	0	0
O43379	O43379	6	6	6	WD repeat-containing protein 62	WDR62	sp|O43379|WDR62_HUMAN WD repeat-containing protein 62 OS=Homo sapiens GN=WDR62 PE=1 SV=4	1	6	6	6	1	3	2	1	1	0	3	2	1	2	0	0	0	1	0	0	1	3	2	1	1	0	3	2	1	2	0	0	0	1	0	0	1	3	2	1	1	0
O43390	O43390	4	4	4	Heterogeneous nuclear ribonucleoprotein R	HNRNPR	sp|O43390|HNRPR_HUMAN Heterogeneous nuclear ribonucleoprotein R OS=Homo sapiens GN=HNRNPR PE=1 SV=1	1	4	4	4	2	3	2	2	2	2	3	3	1	3	2	2	2	3	2	2	2	3	2	2	2	2	3	3	1	3	2	2	2	3	2	2	2	3	2	2	2	2
O43395	O43395	4	4	4	U4/U6 small nuclear ribonucleoprotein Prp3	PRPF3	sp|O43395|PRPF3_HUMAN U4/U6 small nuclear ribonucleoprotein Prp3 OS=Homo sapiens GN=PRPF3 PE=1 SV=2	1	4	4	4	1	2	2	2	1	0	1	2	3	3	1	1	1	0	2	0	1	2	2	2	1	0	1	2	3	3	1	1	1	0	2	0	1	2	2	2	1	0
O43396	O43396	5	5	5	Thioredoxin-like protein 1	TXNL1	sp|O43396|TXNL1_HUMAN Thioredoxin-like protein 1 OS=Homo sapiens GN=TXNL1 PE=1 SV=3	1	5	5	5	3	2	3	3	1	2	3	4	3	3	0	1	3	0	1	0	3	2	3	3	1	2	3	4	3	3	0	1	3	0	1	0	3	2	3	3	1	2
O43402	O43402	1	1	1	ER membrane protein complex subunit 8	EMC8	sp|O43402|EMC8_HUMAN ER membrane protein complex subunit 8 OS=Homo sapiens GN=EMC8 PE=1 SV=1	1	1	1	1	0	0	0	0	0	0	1	1	1	0	0	0	0	0	0	0	0	0	0	0	0	0	1	1	1	0	0	0	0	0	0	0	0	0	0	0	0	0
O43427	O43427	1	1	1	Acidic fibroblast growth factor intracellular-binding protein	FIBP	sp|O43427|FIBP_HUMAN Acidic fibroblast growth factor intracellular-binding protein OS=Homo sapiens GN=FIBP PE=1 SV=3	1	1	1	1	0	0	0	0	1	0	0	0	0	0	0	0	0	0	0	0	0	0	0	0	1	0	0	0	0	0	0	0	0	0	0	0	0	0	0	0	1	0
O43432	O43432	5	5	5	Eukaryotic translation initiation factor 4 gamma 3	EIF4G3	sp|O43432|IF4G3_HUMAN Eukaryotic translation initiation factor 4 gamma 3 OS=Homo sapiens GN=EIF4G3 PE=1 SV=2	1	5	5	5	1	1	1	0	1	0	1	2	0	1	0	0	1	3	0	0	1	1	1	0	1	0	1	2	0	1	0	0	1	3	0	0	1	1	1	0	1	0
O43447	O43447	2	2	2	Peptidyl-prolyl cis-trans isomerase H	PPIH	sp|O43447|PPIH_HUMAN Peptidyl-prolyl cis-trans isomerase H OS=Homo sapiens GN=PPIH PE=1 SV=1	1	2	2	2	0	0	1	2	0	0	1	1	1	1	1	0	1	0	0	0	0	0	1	2	0	0	1	1	1	1	1	0	1	0	0	0	0	0	1	2	0	0
O43464	O43464	2	2	2	Serine protease HTRA2, mitochondrial	HTRA2	sp|O43464|HTRA2_HUMAN Serine protease HTRA2, mitochondrial OS=Homo sapiens GN=HTRA2 PE=1 SV=2	1	2	2	2	1	1	1	2	1	1	1	2	2	2	0	1	2	1	0	0	1	1	1	2	1	1	1	2	2	2	0	1	2	1	0	0	1	1	1	2	1	1
O43488	O43488	1	1	1	Aflatoxin B1 aldehyde reductase member 2	AKR7A2	sp|O43488|ARK72_HUMAN Aflatoxin B1 aldehyde reductase member 2 OS=Homo sapiens GN=AKR7A2 PE=1 SV=3	1	1	1	1	0	0	0	0	0	0	0	0	1	0	0	0	0	0	0	0	0	0	0	0	0	0	0	0	1	0	0	0	0	0	0	0	0	0	0	0	0	0
O43491	O43491	13	13	13	Band 4.1-like protein 2	EPB41L2	sp|O43491|E41L2_HUMAN Band 4.1-like protein 2 OS=Homo sapiens GN=EPB41L2 PE=1 SV=1	1	13	13	13	3	2	6	5	2	2	6	3	5	6	1	4	6	2	2	0	3	2	6	5	2	2	6	3	5	6	1	4	6	2	2	0	3	2	6	5	2	2
O43493	O43493	1	1	1	Trans-Golgi network integral membrane protein 2	TGOLN2	sp|O43493|TGON2_HUMAN Trans-Golgi network integral membrane protein 2 OS=Homo sapiens GN=TGOLN2 PE=1 SV=2	1	1	1	1	1	1	1	1	1	1	1	0	1	1	1	1	1	1	1	0	1	1	1	1	1	1	1	0	1	1	1	1	1	1	1	0	1	1	1	1	1	1
O43505	O43505	5	5	5	Beta-1,4-glucuronyltransferase 1	B4GAT1	sp|O43505|B4GA1_HUMAN Beta-1,4-glucuronyltransferase 1 OS=Homo sapiens GN=B4GAT1 PE=1 SV=1	1	5	5	5	1	2	1	1	2	2	2	2	1	0	1	2	0	0	1	1	1	2	1	1	2	2	2	2	1	0	1	2	0	0	1	1	1	2	1	1	2	2
O43520	O43520	1	1	1	Phospholipid-transporting ATPase IC	ATP8B1	sp|O43520|AT8B1_HUMAN Phospholipid-transporting ATPase IC OS=Homo sapiens GN=ATP8B1 PE=1 SV=3	1	1	1	1	0	0	0	0	0	1	1	0	0	0	1	1	1	0	0	0	0	0	0	0	0	1	1	0	0	0	1	1	1	0	0	0	0	0	0	0	0	1
O43524	O43524	1	1	1	Forkhead box protein O3	FOXO3	sp|O43524|FOXO3_HUMAN Forkhead box protein O3 OS=Homo sapiens GN=FOXO3 PE=1 SV=1	1	1	1	1	0	0	0	0	0	0	0	0	1	1	0	0	0	0	0	0	0	0	0	0	0	0	0	0	1	1	0	0	0	0	0	0	0	0	0	0	0	0
O43556	O43556	1	1	1	Epsilon-sarcoglycan	SGCE	sp|O43556|SGCE_HUMAN Epsilon-sarcoglycan OS=Homo sapiens GN=SGCE PE=1 SV=6	1	1	1	1	0	0	0	0	0	0	0	1	0	0	0	0	0	0	0	1	0	0	0	0	0	0	0	1	0	0	0	0	0	0	0	1	0	0	0	0	0	0
O43572	O43572	2	2	2	A-kinase anchor protein 10, mitochondrial	AKAP10	sp|O43572|AKA10_HUMAN A-kinase anchor protein 10, mitochondrial OS=Homo sapiens GN=AKAP10 PE=1 SV=2	1	2	2	2	1	0	1	1	0	0	1	0	1	1	0	0	0	0	1	0	1	0	1	1	0	0	1	0	1	1	0	0	0	0	1	0	1	0	1	1	0	0
O43583	O43583	2	2	2	Density-regulated protein	DENR	sp|O43583|DENR_HUMAN Density-regulated protein OS=Homo sapiens GN=DENR PE=1 SV=2	1	2	2	2	0	0	1	1	0	0	1	1	1	2	0	0	1	0	0	0	0	0	1	1	0	0	1	1	1	2	0	0	1	0	0	0	0	0	1	1	0	0
O43592	O43592	8	8	8	Exportin-T	XPOT	sp|O43592|XPOT_HUMAN Exportin-T OS=Homo sapiens GN=XPOT PE=1 SV=2	1	8	8	8	4	4	1	3	1	0	4	3	5	2	1	0	0	0	1	0	4	4	1	3	1	0	4	3	5	2	1	0	0	0	1	0	4	4	1	3	1	0
O43617	O43617	1	1	1	Trafficking protein particle complex subunit 3	TRAPPC3	sp|O43617|TPPC3_HUMAN Trafficking protein particle complex subunit 3 OS=Homo sapiens GN=TRAPPC3 PE=1 SV=1	1	1	1	1	0	0	0	0	0	0	0	1	0	0	0	0	0	0	0	0	0	0	0	0	0	0	0	1	0	0	0	0	0	0	0	0	0	0	0	0	0	0
O43657	O43657	1	1	1	Tetraspanin-6	TSPAN6	sp|O43657|TSN6_HUMAN Tetraspanin-6 OS=Homo sapiens GN=TSPAN6 PE=1 SV=1	1	1	1	1	1	0	0	0	0	0	1	0	0	0	0	0	0	0	0	0	1	0	0	0	0	0	1	0	0	0	0	0	0	0	0	0	1	0	0	0	0	0
O43660	O43660	6	6	6	Pleiotropic regulator 1	PLRG1	sp|O43660|PLRG1_HUMAN Pleiotropic regulator 1 OS=Homo sapiens GN=PLRG1 PE=1 SV=1	1	6	6	6	2	2	2	2	2	1	3	5	4	2	2	2	2	2	1	0	2	2	2	2	2	1	3	5	4	2	2	2	2	2	1	0	2	2	2	2	2	1
O43663	O43663	4	4	4	Protein regulator of cytokinesis 1	PRC1	sp|O43663|PRC1_HUMAN Protein regulator of cytokinesis 1 OS=Homo sapiens GN=PRC1 PE=1 SV=2	1	4	4	4	3	1	2	2	0	0	2	2	2	2	1	0	1	2	2	1	3	1	2	2	0	0	2	2	2	2	1	0	1	2	2	1	3	1	2	2	0	0
O43665	O43665	1	1	1	Regulator of G-protein signaling 10	RGS10	sp|O43665|RGS10_HUMAN Regulator of G-protein signaling 10 OS=Homo sapiens GN=RGS10 PE=1 SV=2	1	1	1	1	0	1	0	0	0	0	0	0	0	0	0	0	1	0	0	1	0	1	0	0	0	0	0	0	0	0	0	0	1	0	0	1	0	1	0	0	0	0
O43670	O43670	1	1	1	BUB3-interacting and GLEBS motif-containing protein ZNF207	ZNF207	sp|O43670|ZN207_HUMAN BUB3-interacting and GLEBS motif-containing protein ZNF207 OS=Homo sapiens GN=ZNF207 PE=1 SV=1	1	1	1	1	1	1	1	1	0	0	1	1	0	1	0	0	1	1	0	0	1	1	1	1	0	0	1	1	0	1	0	0	1	1	0	0	1	1	1	1	0	0
O43678	O43678	1	1	1	NADH dehydrogenase [ubiquinone] 1 alpha subcomplex subunit 2	NDUFA2	sp|O43678|NDUA2_HUMAN NADH dehydrogenase [ubiquinone] 1 alpha subcomplex subunit 2 OS=Homo sapiens GN=NDUFA2 PE=1 SV=3	1	1	1	1	0	0	1	1	1	1	0	1	0	1	0	1	1	1	0	0	0	0	1	1	1	1	0	1	0	1	0	1	1	1	0	0	0	0	1	1	1	1
O43681	O43681	6	6	6	ATPase ASNA1	ASNA1	sp|O43681|ASNA_HUMAN ATPase ASNA1 OS=Homo sapiens GN=ASNA1 PE=1 SV=2	1	6	6	6	3	2	3	3	3	3	6	5	5	4	3	3	4	5	4	0	3	2	3	3	3	3	6	5	5	4	3	3	4	5	4	0	3	2	3	3	3	3
O43683	O43683	3	3	2	Mitotic checkpoint serine/threonine-protein kinase BUB1	BUB1	sp|O43683|BUB1_HUMAN Mitotic checkpoint serine/threonine-protein kinase BUB1 OS=Homo sapiens GN=BUB1 PE=1 SV=1	1	3	3	2	0	0	0	1	0	0	1	0	0	0	0	0	0	0	0	0	0	0	0	1	0	0	1	0	0	0	0	0	0	0	0	0	0	0	0	1	0	0
O43684	O43684	6	6	6	Mitotic checkpoint protein BUB3	BUB3	sp|O43684|BUB3_HUMAN Mitotic checkpoint protein BUB3 OS=Homo sapiens GN=BUB3 PE=1 SV=1	1	6	6	6	3	3	1	1	0	0	4	4	3	4	0	0	2	3	2	1	3	3	1	1	0	0	4	4	3	4	0	0	2	3	2	1	3	3	1	1	0	0
O43707	O43707	19	15	15	Alpha-actinin-4	ACTN4	sp|O43707|ACTN4_HUMAN Alpha-actinin-4 OS=Homo sapiens GN=ACTN4 PE=1 SV=2	1	19	15	15	11	14	5	6	3	5	11	8	7	6	4	5	7	7	4	4	9	10	3	6	2	3	8	8	6	5	3	3	6	7	4	4	9	10	3	6	2	3
O43709	O43709	2	2	2	Probable 18S rRNA (guanine-N(7))-methyltransferase	WBSCR22	sp|O43709|WBS22_HUMAN Probable 18S rRNA (guanine-N(7))-methyltransferase OS=Homo sapiens GN=WBSCR22 PE=1 SV=2	1	2	2	2	0	1	1	1	0	1	2	2	2	1	0	1	2	1	1	0	0	1	1	1	0	1	2	2	2	1	0	1	2	1	1	0	0	1	1	1	0	1
O43719	O43719	6	6	6	HIV Tat-specific factor 1	HTATSF1	sp|O43719|HTSF1_HUMAN HIV Tat-specific factor 1 OS=Homo sapiens GN=HTATSF1 PE=1 SV=1	1	6	6	6	2	0	3	2	1	0	2	1	4	4	2	1	2	0	0	0	2	0	3	2	1	0	2	1	4	4	2	1	2	0	0	0	2	0	3	2	1	0
O43747	O43747	7	7	7	AP-1 complex subunit gamma-1	AP1G1	sp|O43747|AP1G1_HUMAN AP-1 complex subunit gamma-1 OS=Homo sapiens GN=AP1G1 PE=1 SV=5	1	7	7	7	6	4	3	3	1	1	4	4	4	4	1	1	3	4	3	0	6	4	3	3	1	1	4	4	4	4	1	1	3	4	3	0	6	4	3	3	1	1
O43752	O43752	2	2	2	Syntaxin-6	STX6	sp|O43752|STX6_HUMAN Syntaxin-6 OS=Homo sapiens GN=STX6 PE=1 SV=1	1	2	2	2	1	1	1	1	0	0	2	2	2	0	0	1	2	2	1	0	1	1	1	1	0	0	2	2	2	0	0	1	2	2	1	0	1	1	1	1	0	0
O43760	O43760	1	1	1	Synaptogyrin-2	SYNGR2	sp|O43760|SNG2_HUMAN Synaptogyrin-2 OS=Homo sapiens GN=SYNGR2 PE=1 SV=1	1	1	1	1	0	0	0	0	0	1	0	0	0	0	0	0	0	1	0	0	0	0	0	0	0	1	0	0	0	0	0	0	0	1	0	0	0	0	0	0	0	1
O43772	O43772	2	2	2	Mitochondrial carnitine/acylcarnitine carrier protein	SLC25A20	sp|O43772|MCAT_HUMAN Mitochondrial carnitine/acylcarnitine carrier protein OS=Homo sapiens GN=SLC25A20 PE=1 SV=1	1	2	2	2	1	1	2	2	1	1	1	1	1	1	0	1	1	1	0	0	1	1	2	2	1	1	1	1	1	1	0	1	1	1	0	0	1	1	2	2	1	1
O43776	O43776	8	8	8	Asparagine--tRNA ligase, cytoplasmic	NARS	sp|O43776|SYNC_HUMAN Asparagine--tRNA ligase, cytoplasmic OS=Homo sapiens GN=NARS PE=1 SV=1	1	8	8	8	3	5	5	4	3	1	3	4	6	5	3	3	2	5	4	0	3	5	5	4	3	1	3	4	6	5	3	3	2	5	4	0	3	5	5	4	3	1
O43795	O43795	5	5	5	Unconventional myosin-Ib	MYO1B	sp|O43795|MYO1B_HUMAN Unconventional myosin-Ib OS=Homo sapiens GN=MYO1B PE=1 SV=3	1	5	5	5	2	1	2	1	2	2	2	3	1	1	2	2	4	5	3	1	2	1	2	1	2	2	2	3	1	1	2	2	4	5	3	1	2	1	2	1	2	2
O43809	O43809	3	3	3	Cleavage and polyadenylation specificity factor subunit 5	NUDT21	sp|O43809|CPSF5_HUMAN Cleavage and polyadenylation specificity factor subunit 5 OS=Homo sapiens GN=NUDT21 PE=1 SV=1	1	3	3	3	1	2	1	1	1	2	1	1	1	2	1	2	1	1	1	2	1	2	1	1	1	2	1	1	1	2	1	2	1	1	1	2	1	2	1	1	1	2
O43813	O43813	3	3	3	LanC-like protein 1	LANCL1	sp|O43813|LANC1_HUMAN LanC-like protein 1 OS=Homo sapiens GN=LANCL1 PE=1 SV=1	1	3	3	3	1	1	0	1	0	0	2	3	2	0	0	0	0	1	0	0	1	1	0	1	0	0	2	3	2	0	0	0	0	1	0	0	1	1	0	1	0	0
O43815	O43815	5	5	5	Striatin	STRN	sp|O43815|STRN_HUMAN Striatin OS=Homo sapiens GN=STRN PE=1 SV=4	1	5	5	5	2	1	1	1	1	0	1	1	0	1	1	0	1	1	0	0	2	1	1	1	1	0	1	1	0	1	1	0	1	1	0	0	2	1	1	1	1	0
O43818	O43818	5	5	5	U3 small nucleolar RNA-interacting protein 2	RRP9	sp|O43818|U3IP2_HUMAN U3 small nucleolar RNA-interacting protein 2 OS=Homo sapiens GN=RRP9 PE=1 SV=1	1	5	5	5	2	4	3	3	0	2	4	3	3	3	2	3	2	1	2	1	2	4	3	3	0	2	4	3	3	3	2	3	2	1	2	1	2	4	3	3	0	2
O43819	O43819	2	2	2	Protein SCO2 homolog, mitochondrial	SCO2	sp|O43819|SCO2_HUMAN Protein SCO2 homolog, mitochondrial OS=Homo sapiens GN=SCO2 PE=1 SV=3	1	2	2	2	0	0	0	1	0	0	0	0	0	0	1	0	1	1	1	0	0	0	0	1	0	0	0	0	0	0	1	0	1	1	1	0	0	0	0	1	0	0
O43823	O43823	7	7	7	A-kinase anchor protein 8	AKAP8	sp|O43823|AKAP8_HUMAN A-kinase anchor protein 8 OS=Homo sapiens GN=AKAP8 PE=1 SV=1	1	7	7	7	4	4	3	3	1	2	2	3	3	3	0	1	2	1	1	0	4	4	3	3	1	2	2	3	3	3	0	1	2	1	1	0	4	4	3	3	1	2
O43824	O43824	2	2	2	Putative GTP-binding protein 6	GTPBP6	sp|O43824|GTPB6_HUMAN Putative GTP-binding protein 6 OS=Homo sapiens GN=GTPBP6 PE=2 SV=3	1	2	2	2	1	2	1	1	0	1	1	0	1	1	0	1	2	0	1	0	1	2	1	1	0	1	1	0	1	1	0	1	2	0	1	0	1	2	1	1	0	1
O43829	O43829	1	1	1	Zinc finger and BTB domain-containing protein 14	ZBTB14	sp|O43829|ZBT14_HUMAN Zinc finger and BTB domain-containing protein 14 OS=Homo sapiens GN=ZBTB14 PE=1 SV=2	1	1	1	1	1	0	1	1	0	0	1	0	1	1	0	0	0	0	0	0	1	0	1	1	0	0	1	0	1	1	0	0	0	0	0	0	1	0	1	1	0	0
O43837	O43837	3	3	3	Isocitrate dehydrogenase [NAD] subunit beta, mitochondrial	IDH3B	sp|O43837|IDH3B_HUMAN Isocitrate dehydrogenase [NAD] subunit beta, mitochondrial OS=Homo sapiens GN=IDH3B PE=1 SV=2	1	3	3	3	1	1	1	1	0	0	1	3	1	1	1	1	2	2	2	0	1	1	1	1	0	0	1	3	1	1	1	1	2	2	2	0	1	1	1	1	0	0
O43847	O43847	4	4	4	Nardilysin	NRD1	sp|O43847|NRDC_HUMAN Nardilysin OS=Homo sapiens GN=NRD1 PE=1 SV=2	1	4	4	4	1	0	0	0	0	0	0	1	0	0	0	0	2	1	2	1	1	0	0	0	0	0	0	1	0	0	0	0	2	1	2	1	1	0	0	0	0	0
O43852	O43852	4	4	4	Calumenin	CALU	sp|O43852|CALU_HUMAN Calumenin OS=Homo sapiens GN=CALU PE=1 SV=2	1	4	4	4	2	2	3	2	2	2	4	4	3	3	2	2	4	2	2	0	2	2	3	2	2	2	4	4	3	3	2	2	4	2	2	0	2	2	3	2	2	2
O43865	O43865	3	3	3	Putative adenosylhomocysteinase 2	AHCYL1	sp|O43865|SAHH2_HUMAN Adenosylhomocysteinase 2 OS=Homo sapiens GN=AHCYL1 PE=1 SV=2	1	3	3	3	0	0	1	1	0	0	2	1	2	1	0	0	2	1	0	0	0	0	1	1	0	0	2	1	2	1	0	0	2	1	0	0	0	0	1	1	0	0
O43896	O43896	3	3	3	Kinesin-like protein KIF1C	KIF1C	sp|O43896|KIF1C_HUMAN Kinesin-like protein KIF1C OS=Homo sapiens GN=KIF1C PE=1 SV=3	1	3	3	3	1	1	2	1	1	0	1	0	2	1	1	1	1	0	1	0	1	1	2	1	1	0	1	0	2	1	1	1	1	0	1	0	1	1	2	1	1	0
O43909	O43909	2	2	2	Exostosin-like 3	EXTL3	sp|O43909|EXTL3_HUMAN Exostosin-like 3 OS=Homo sapiens GN=EXTL3 PE=1 SV=1	1	2	2	2	2	0	1	1	0	0	0	0	0	1	0	0	0	0	0	0	2	0	1	1	0	0	0	0	0	1	0	0	0	0	0	0	2	0	1	1	0	0
O43913	O43913	2	2	2	Origin recognition complex subunit 5	ORC5	sp|O43913|ORC5_HUMAN Origin recognition complex subunit 5 OS=Homo sapiens GN=ORC5 PE=1 SV=1	1	2	2	2	0	1	1	1	0	0	1	2	1	1	0	0	1	0	1	0	0	1	1	1	0	0	1	2	1	1	0	0	1	0	1	0	0	1	1	1	0	0
O43929	O43929	1	1	1	Origin recognition complex subunit 4	ORC4	sp|O43929|ORC4_HUMAN Origin recognition complex subunit 4 OS=Homo sapiens GN=ORC4 PE=1 SV=2	1	1	1	1	0	0	0	0	0	0	1	1	1	1	0	0	1	0	0	0	0	0	0	0	0	0	1	1	1	1	0	0	1	0	0	0	0	0	0	0	0	0
O60216	O60216	7	7	7	Double-strand-break repair protein rad21 homolog	RAD21	sp|O60216|RAD21_HUMAN Double-strand-break repair protein rad21 homolog OS=Homo sapiens GN=RAD21 PE=1 SV=2	1	7	7	7	5	4	4	4	3	3	7	4	5	4	4	4	3	2	3	1	5	4	4	4	3	3	7	4	5	4	4	4	3	2	3	1	5	4	4	4	3	3
O60220	O60220	1	1	1	Mitochondrial import inner membrane translocase subunit Tim8 A	TIMM8A	sp|O60220|TIM8A_HUMAN Mitochondrial import inner membrane translocase subunit Tim8 A OS=Homo sapiens GN=TIMM8A PE=1 SV=1	1	1	1	1	1	1	1	1	0	1	1	0	1	0	1	1	0	0	1	0	1	1	1	1	0	1	1	0	1	0	1	1	0	0	1	0	1	1	1	1	0	1
O60231	O60231	3	3	3	Putative pre-mRNA-splicing factor ATP-dependent RNA helicase DHX16	DHX16	sp|O60231|DHX16_HUMAN Putative pre-mRNA-splicing factor ATP-dependent RNA helicase DHX16 OS=Homo sapiens GN=DHX16 PE=1 SV=2	1	3	3	3	1	0	0	0	0	0	0	1	1	1	0	0	1	3	1	0	1	0	0	0	0	0	0	1	1	1	0	0	1	3	1	0	1	0	0	0	0	0
O60232	O60232	3	3	3	Sjoegren syndrome/scleroderma autoantigen 1	SSSCA1	sp|O60232|SSA27_HUMAN Sjoegren syndrome/scleroderma autoantigen 1 OS=Homo sapiens GN=SSSCA1 PE=1 SV=1	1	3	3	3	1	1	1	1	0	0	1	2	1	0	0	0	1	0	0	0	1	1	1	1	0	0	1	2	1	0	0	0	1	0	0	0	1	1	1	1	0	0
O60244	O60244	2	2	2	Mediator of RNA polymerase II transcription subunit 14	MED14	sp|O60244|MED14_HUMAN Mediator of RNA polymerase II transcription subunit 14 OS=Homo sapiens GN=MED14 PE=1 SV=2	1	2	2	2	0	1	1	1	0	0	1	1	1	2	0	0	0	0	0	0	0	1	1	1	0	0	1	1	1	2	0	0	0	0	0	0	0	1	1	1	0	0
O60256	O60256	2	2	2	Phosphoribosyl pyrophosphate synthase-associated protein 2	PRPSAP2	sp|O60256|KPRB_HUMAN Phosphoribosyl pyrophosphate synthase-associated protein 2 OS=Homo sapiens GN=PRPSAP2 PE=1 SV=1	1	2	2	2	0	0	0	1	1	0	0	0	0	0	0	0	1	0	0	0	0	0	0	1	1	0	0	0	0	0	0	0	1	0	0	0	0	0	0	1	1	0
O60264	O60264	5	5	5	SWI/SNF-related matrix-associated actin-dependent regulator of chromatin subfamily A member 5	SMARCA5	sp|O60264|SMCA5_HUMAN SWI/SNF-related matrix-associated actin-dependent regulator of chromatin subfamily A member 5 OS=Homo sapiens GN=SMARCA5 PE=1 SV=1	1	5	5	5	3	3	1	3	2	2	3	3	2	0	2	2	0	2	2	1	3	3	1	3	2	2	3	3	2	0	2	2	0	2	2	1	3	3	1	3	2	2
O60271	O60271	7	7	7	C-Jun-amino-terminal kinase-interacting protein 4	SPAG9	sp|O60271|JIP4_HUMAN C-Jun-amino-terminal kinase-interacting protein 4 OS=Homo sapiens GN=SPAG9 PE=1 SV=4	1	7	7	7	5	2	4	4	4	4	3	3	4	4	2	3	3	2	4	0	5	2	4	4	4	4	3	3	4	4	2	3	3	2	4	0	5	2	4	4	4	4
O60287	O60287	4	4	4	Nucleolar pre-ribosomal-associated protein 1	URB1	sp|O60287|NPA1P_HUMAN Nucleolar pre-ribosomal-associated protein 1 OS=Homo sapiens GN=URB1 PE=1 SV=4	1	4	4	4	0	1	2	2	0	0	1	0	1	1	0	1	2	0	1	0	0	1	2	2	0	0	1	0	1	1	0	1	2	0	1	0	0	1	2	2	0	0
O60291	O60291	5	5	5	E3 ubiquitin-protein ligase MGRN1	MGRN1	sp|O60291|MGRN1_HUMAN E3 ubiquitin-protein ligase MGRN1 OS=Homo sapiens GN=MGRN1 PE=1 SV=2	1	5	5	5	2	2	2	3	1	0	4	0	4	5	1	1	1	0	2	0	2	2	2	3	1	0	4	0	4	5	1	1	1	0	2	0	2	2	2	3	1	0
O60292	O60292	3	3	3	Signal-induced proliferation-associated 1-like protein 3	SIPA1L3	sp|O60292|SI1L3_HUMAN Signal-induced proliferation-associated 1-like protein 3 OS=Homo sapiens GN=SIPA1L3 PE=1 SV=3	1	3	3	3	0	0	0	1	0	0	1	0	1	1	0	0	0	0	1	0	0	0	0	1	0	0	1	0	1	1	0	0	0	0	1	0	0	0	0	1	0	0
O60293	O60293	3	3	3	Zinc finger C3H1 domain-containing protein	ZFC3H1	sp|O60293|ZC3H1_HUMAN Zinc finger C3H1 domain-containing protein OS=Homo sapiens GN=ZFC3H1 PE=1 SV=3	1	3	3	3	2	1	1	1	0	0	1	1	0	1	0	0	0	0	0	0	2	1	1	1	0	0	1	1	0	1	0	0	0	0	0	0	2	1	1	1	0	0
O60306	O60306	7	7	7	Intron-binding protein aquarius	AQR	sp|O60306|AQR_HUMAN Intron-binding protein aquarius OS=Homo sapiens GN=AQR PE=1 SV=4	1	7	7	7	0	1	1	1	0	0	3	2	2	0	0	0	0	2	1	1	0	1	1	1	0	0	3	2	2	0	0	0	0	2	1	1	0	1	1	1	0	0
O60313	O60313	7	7	7	Dynamin-like 120 kDa protein, mitochondrial;Dynamin-like 120 kDa protein, form S1	OPA1	sp|O60313|OPA1_HUMAN Dynamin-like 120 kDa protein, mitochondrial OS=Homo sapiens GN=OPA1 PE=1 SV=3	1	7	7	7	4	4	3	2	2	2	3	4	3	3	2	3	3	3	2	2	4	4	3	2	2	2	3	4	3	3	2	3	3	3	2	2	4	4	3	2	2	2
O60315	O60315	4	4	4	Zinc finger E-box-binding homeobox 2	ZEB2	sp|O60315|ZEB2_HUMAN Zinc finger E-box-binding homeobox 2 OS=Homo sapiens GN=ZEB2 PE=1 SV=1	1	4	4	4	1	1	3	0	0	0	3	0	2	1	1	1	0	0	0	0	1	1	3	0	0	0	3	0	2	1	1	1	0	0	0	0	1	1	3	0	0	0
O60318	O60318	7	7	7	Germinal-center associated nuclear protein	MCM3AP	sp|O60318|GANP_HUMAN Germinal-center associated nuclear protein OS=Homo sapiens GN=MCM3AP PE=1 SV=2	1	7	7	7	2	2	4	1	0	0	3	2	3	3	1	1	1	1	4	0	2	2	4	1	0	0	3	2	3	3	1	1	1	1	4	0	2	2	4	1	0	0
O60333;Q12756	O60333	9;2	9;2	9;2	Kinesin-like protein KIF1B	KIF1B	sp|O60333|KIF1B_HUMAN Kinesin-like protein KIF1B OS=Homo sapiens GN=KIF1B PE=1 SV=5	2	9	9	9	3	2	2	3	0	0	6	1	3	4	1	0	0	1	0	0	3	2	2	3	0	0	6	1	3	4	1	0	0	1	0	0	3	2	2	3	0	0
O60341	O60341	5	5	5	Lysine-specific histone demethylase 1A	KDM1A	sp|O60341|KDM1A_HUMAN Lysine-specific histone demethylase 1A OS=Homo sapiens GN=KDM1A PE=1 SV=2	1	5	5	5	1	0	1	0	0	0	4	2	1	3	0	0	1	1	1	0	1	0	1	0	0	0	4	2	1	3	0	0	1	1	1	0	1	0	1	0	0	0
O60343	O60343	1	1	1	TBC1 domain family member 4	TBC1D4	sp|O60343|TBCD4_HUMAN TBC1 domain family member 4 OS=Homo sapiens GN=TBC1D4 PE=1 SV=2	1	1	1	1	0	0	0	0	0	0	1	0	1	0	0	0	0	0	0	0	0	0	0	0	0	0	1	0	1	0	0	0	0	0	0	0	0	0	0	0	0	0
O60353	O60353	2	2	2	Frizzled-6	FZD6	sp|O60353|FZD6_HUMAN Frizzled-6 OS=Homo sapiens GN=FZD6 PE=1 SV=2	1	2	2	2	0	0	1	1	0	0	1	0	1	0	1	0	1	0	0	0	0	0	1	1	0	0	1	0	1	0	1	0	1	0	0	0	0	0	1	1	0	0
O60361;P22392	O60361;P22392	1;1	1;1	1;1	Putative nucleoside diphosphate kinase;Nucleoside diphosphate kinase B	NME2P1;NME2	sp|O60361|NDK8_HUMAN Putative nucleoside diphosphate kinase OS=Homo sapiens GN=NME2P1 PE=5 SV=1;sp|P22392|NDKB_HUMAN Nucleoside diphosphate kinase B OS=Homo sapiens GN=NME2 PE=1 SV=1	2	1	1	1	1	1	0	1	1	0	1	1	1	1	0	1	1	1	0	0	1	1	0	1	1	0	1	1	1	1	0	1	1	1	0	0	1	1	0	1	1	0
O60427	O60427	2	2	2	Fatty acid desaturase 1	FADS1	sp|O60427|FADS1_HUMAN Fatty acid desaturase 1 OS=Homo sapiens GN=FADS1 PE=1 SV=3	1	2	2	2	0	1	1	1	1	0	1	1	1	1	1	1	0	2	1	1	0	1	1	1	1	0	1	1	1	1	1	1	0	2	1	1	0	1	1	1	1	0
O60443	O60443	3	3	3	Non-syndromic hearing impairment protein 5	DFNA5	sp|O60443|DFNA5_HUMAN Non-syndromic hearing impairment protein 5 OS=Homo sapiens GN=DFNA5 PE=1 SV=2	1	3	3	3	1	2	1	1	1	1	3	2	2	3	0	1	3	1	2	0	1	2	1	1	1	1	3	2	2	3	0	1	3	1	2	0	1	2	1	1	1	1
O60462	O60462	2	2	2	Neuropilin-2	NRP2	sp|O60462|NRP2_HUMAN Neuropilin-2 OS=Homo sapiens GN=NRP2 PE=1 SV=2	1	2	2	2	0	0	1	1	0	0	1	1	1	0	0	0	0	0	0	0	0	0	1	1	0	0	1	1	1	0	0	0	0	0	0	0	0	0	1	1	0	0
O60488	O60488	7	7	7	Long-chain-fatty-acid--CoA ligase 4	ACSL4	sp|O60488|ACSL4_HUMAN Long-chain-fatty-acid--CoA ligase 4 OS=Homo sapiens GN=ACSL4 PE=1 SV=2	1	7	7	7	3	4	4	4	1	2	4	5	5	5	3	3	4	4	1	2	3	4	4	4	1	2	4	5	5	5	3	3	4	4	1	2	3	4	4	4	1	2
O60493	O60493	1	1	1	Sorting nexin-3	SNX3	sp|O60493|SNX3_HUMAN Sorting nexin-3 OS=Homo sapiens GN=SNX3 PE=1 SV=3	1	1	1	1	1	0	0	0	1	1	1	0	0	0	0	0	0	0	0	0	1	0	0	0	1	1	1	0	0	0	0	0	0	0	0	0	1	0	0	0	1	1
O60499	O60499	2	2	2	Syntaxin-10	STX10	sp|O60499|STX10_HUMAN Syntaxin-10 OS=Homo sapiens GN=STX10 PE=1 SV=1	1	2	2	2	1	1	1	1	1	0	2	0	1	1	1	1	1	0	1	0	1	1	1	1	1	0	2	0	1	1	1	1	1	0	1	0	1	1	1	1	1	0
O60502	O60502	6	6	6	Protein O-GlcNAcase	MGEA5	sp|O60502|OGA_HUMAN Protein O-GlcNAcase OS=Homo sapiens GN=MGEA5 PE=1 SV=2	1	6	6	6	1	2	3	2	0	0	3	2	3	3	0	0	1	2	0	0	1	2	3	2	0	0	3	2	3	3	0	0	1	2	0	0	1	2	3	2	0	0
O60504	O60504	1	1	1	Vinexin	SORBS3	sp|O60504|VINEX_HUMAN Vinexin OS=Homo sapiens GN=SORBS3 PE=1 SV=2	1	1	1	1	1	1	1	0	0	1	1	0	1	0	0	0	0	0	0	0	1	1	1	0	0	1	1	0	1	0	0	0	0	0	0	0	1	1	1	0	0	1
O60506	O60506	5	5	4	Heterogeneous nuclear ribonucleoprotein Q	SYNCRIP	sp|O60506|HNRPQ_HUMAN Heterogeneous nuclear ribonucleoprotein Q OS=Homo sapiens GN=SYNCRIP PE=1 SV=2	1	5	5	4	3	2	4	4	2	4	4	4	3	4	3	3	4	3	4	2	3	2	4	4	2	4	4	4	3	4	3	3	4	3	4	2	3	2	4	4	2	4
O60508	O60508	5	5	5	Pre-mRNA-processing factor 17	CDC40	sp|O60508|PRP17_HUMAN Pre-mRNA-processing factor 17 OS=Homo sapiens GN=CDC40 PE=1 SV=1	1	5	5	5	1	0	1	1	0	0	1	2	2	3	1	0	0	1	2	0	1	0	1	1	0	0	1	2	2	3	1	0	0	1	2	0	1	0	1	1	0	0
O60518	O60518	11	11	11	Ran-binding protein 6	RANBP6	sp|O60518|RNBP6_HUMAN Ran-binding protein 6 OS=Homo sapiens GN=RANBP6 PE=1 SV=2	1	11	11	11	2	1	3	1	0	1	2	6	5	6	1	0	3	2	0	1	2	1	3	1	0	1	2	6	5	6	1	0	3	2	0	1	2	1	3	1	0	1
O60524	O60524	1	1	1	Nuclear export mediator factor NEMF	NEMF	sp|O60524|NEMF_HUMAN Nuclear export mediator factor NEMF OS=Homo sapiens GN=NEMF PE=1 SV=4	1	1	1	1	0	0	0	0	0	0	1	0	1	0	0	0	1	0	1	0	0	0	0	0	0	0	1	0	1	0	0	0	1	0	1	0	0	0	0	0	0	0
O60563	O60563	1	1	1	Cyclin-T1	CCNT1	sp|O60563|CCNT1_HUMAN Cyclin-T1 OS=Homo sapiens GN=CCNT1 PE=1 SV=1	1	1	1	1	0	1	0	0	0	0	1	0	0	0	0	0	1	0	0	0	0	1	0	0	0	0	1	0	0	0	0	0	1	0	0	0	0	1	0	0	0	0
O60566	O60566	4	4	4	Mitotic checkpoint serine/threonine-protein kinase BUB1 beta	BUB1B	sp|O60566|BUB1B_HUMAN Mitotic checkpoint serine/threonine-protein kinase BUB1 beta OS=Homo sapiens GN=BUB1B PE=1 SV=3	1	4	4	4	2	3	1	2	1	0	1	0	2	2	1	0	1	0	1	0	2	3	1	2	1	0	1	0	2	2	1	0	1	0	1	0	2	3	1	2	1	0
O60568	O60568	5	5	5	Procollagen-lysine,2-oxoglutarate 5-dioxygenase 3	PLOD3	sp|O60568|PLOD3_HUMAN Procollagen-lysine,2-oxoglutarate 5-dioxygenase 3 OS=Homo sapiens GN=PLOD3 PE=1 SV=1	1	5	5	5	3	2	2	0	2	2	0	2	1	2	3	1	4	3	3	1	3	2	2	0	2	2	0	2	1	2	3	1	4	3	3	1	3	2	2	0	2	2
O60573	O60573	1	1	1	Eukaryotic translation initiation factor 4E type 2	EIF4E2	sp|O60573|IF4E2_HUMAN Eukaryotic translation initiation factor 4E type 2 OS=Homo sapiens GN=EIF4E2 PE=1 SV=1	1	1	1	1	1	1	1	0	0	0	0	1	1	1	0	0	0	0	0	0	1	1	1	0	0	0	0	1	1	1	0	0	0	0	0	0	1	1	1	0	0	0
O60610	O60610	10	10	10	Protein diaphanous homolog 1	DIAPH1	sp|O60610|DIAP1_HUMAN Protein diaphanous homolog 1 OS=Homo sapiens GN=DIAPH1 PE=1 SV=2	1	10	10	10	6	5	6	7	4	5	8	6	6	7	3	4	7	6	8	1	6	5	6	7	4	5	8	6	6	7	3	4	7	6	8	1	6	5	6	7	4	5
O60613	O60613	1	1	1	15 kDa selenoprotein	SEP15	sp|O60613|SEP15_HUMAN 15 kDa selenoprotein OS=Homo sapiens GN=SEP15 PE=1 SV=3	1	1	1	1	1	1	0	1	0	1	1	1	1	1	1	1	1	1	0	0	1	1	0	1	0	1	1	1	1	1	1	1	1	1	0	0	1	1	0	1	0	1
O60645	O60645	4	4	4	Exocyst complex component 3	EXOC3	sp|O60645|EXOC3_HUMAN Exocyst complex component 3 OS=Homo sapiens GN=EXOC3 PE=1 SV=2	1	4	4	4	2	2	1	0	1	2	2	2	1	0	0	0	1	1	1	0	2	2	1	0	1	2	2	2	1	0	0	0	1	1	1	0	2	2	1	0	1	2
O60664	O60664	7	7	7	Perilipin-3	PLIN3	sp|O60664|PLIN3_HUMAN Perilipin-3 OS=Homo sapiens GN=PLIN3 PE=1 SV=3	1	7	7	7	2	5	2	3	2	2	3	5	6	4	1	2	5	3	3	1	2	5	2	3	2	2	3	5	6	4	1	2	5	3	3	1	2	5	2	3	2	2
O60671	O60671	1	1	1	Cell cycle checkpoint protein RAD1	RAD1	sp|O60671|RAD1_HUMAN Cell cycle checkpoint protein RAD1 OS=Homo sapiens GN=RAD1 PE=1 SV=1	1	1	1	1	0	0	1	0	0	0	0	0	1	1	0	0	1	0	0	0	0	0	1	0	0	0	0	0	1	1	0	0	1	0	0	0	0	0	1	0	0	0
O60678	O60678	2	2	2	Protein arginine N-methyltransferase 3	PRMT3	sp|O60678|ANM3_HUMAN Protein arginine N-methyltransferase 3 OS=Homo sapiens GN=PRMT3 PE=1 SV=3	1	2	2	2	1	1	1	1	0	0	2	2	0	1	0	0	1	1	0	0	1	1	1	1	0	0	2	2	0	1	0	0	1	1	0	0	1	1	1	1	0	0
O60684;O15131	O60684	8;3	8;3	8;3	Importin subunit alpha-7	KPNA6	sp|O60684|IMA7_HUMAN Importin subunit alpha-7 OS=Homo sapiens GN=KPNA6 PE=1 SV=1	2	8	8	8	5	3	3	4	2	2	6	7	3	4	1	2	2	3	1	0	5	3	3	4	2	2	6	7	3	4	1	2	2	3	1	0	5	3	3	4	2	2
O60701	O60701	6	6	6	UDP-glucose 6-dehydrogenase	UGDH	sp|O60701|UGDH_HUMAN UDP-glucose 6-dehydrogenase OS=Homo sapiens GN=UGDH PE=1 SV=1	1	6	6	6	3	5	2	4	1	2	4	4	5	5	0	0	2	3	1	1	3	5	2	4	1	2	4	4	5	5	0	0	2	3	1	1	3	5	2	4	1	2
O60711	O60711	2	2	2	Leupaxin	LPXN	sp|O60711|LPXN_HUMAN Leupaxin OS=Homo sapiens GN=LPXN PE=1 SV=1	1	2	2	2	1	1	0	1	0	0	0	0	1	1	0	0	0	1	0	0	1	1	0	1	0	0	0	0	1	1	0	0	0	1	0	0	1	1	0	1	0	0
O60716	O60716	10	10	10	Catenin delta-1	CTNND1	sp|O60716|CTND1_HUMAN Catenin delta-1 OS=Homo sapiens GN=CTNND1 PE=1 SV=1	1	10	10	10	5	6	3	5	3	5	6	6	3	4	4	5	6	7	4	0	5	6	3	5	3	5	6	6	3	4	4	5	6	7	4	0	5	6	3	5	3	5
O60725	O60725	1	1	1	Protein-S-isoprenylcysteine O-methyltransferase	ICMT	sp|O60725|ICMT_HUMAN Protein-S-isoprenylcysteine O-methyltransferase OS=Homo sapiens GN=ICMT PE=1 SV=1	1	1	1	1	0	0	0	0	0	0	0	0	0	0	0	0	0	0	1	0	0	0	0	0	0	0	0	0	0	0	0	0	0	0	1	0	0	0	0	0	0	0
P41567;O60739	P41567;O60739	1;1	1;1	1;1	Eukaryotic translation initiation factor 1;Eukaryotic translation initiation factor 1b	EIF1;EIF1B	sp|P41567|EIF1_HUMAN Eukaryotic translation initiation factor 1 OS=Homo sapiens GN=EIF1 PE=1 SV=1;sp|O60739|EIF1B_HUMAN Eukaryotic translation initiation factor 1b OS=Homo sapiens GN=EIF1B PE=1 SV=2	2	1	1	1	1	0	1	1	0	1	1	1	1	0	0	0	0	0	1	0	1	0	1	1	0	1	1	1	1	0	0	0	0	0	1	0	1	0	1	1	0	1
O60749	O60749	1	1	1	Sorting nexin-2	SNX2	sp|O60749|SNX2_HUMAN Sorting nexin-2 OS=Homo sapiens GN=SNX2 PE=1 SV=2	1	1	1	1	0	0	0	0	1	1	0	0	0	0	0	0	1	1	0	0	0	0	0	0	1	1	0	0	0	0	0	0	1	1	0	0	0	0	0	0	1	1
O60762	O60762	1	1	1	Dolichol-phosphate mannosyltransferase subunit 1	DPM1	sp|O60762|DPM1_HUMAN Dolichol-phosphate mannosyltransferase subunit 1 OS=Homo sapiens GN=DPM1 PE=1 SV=1	1	1	1	1	1	1	1	0	1	1	1	1	1	1	1	1	0	1	1	1	1	1	1	0	1	1	1	1	1	1	1	1	0	1	1	1	1	1	1	0	1	1
O60763	O60763	11	11	11	General vesicular transport factor p115	USO1	sp|O60763|USO1_HUMAN General vesicular transport factor p115 OS=Homo sapiens GN=USO1 PE=1 SV=2	1	11	11	11	3	4	4	3	2	3	5	6	5	6	0	3	2	4	0	1	3	4	4	3	2	3	5	6	5	6	0	3	2	4	0	1	3	4	4	3	2	3
O60779	O60779	1	1	1	Thiamine transporter 1	SLC19A2	sp|O60779|S19A2_HUMAN Thiamine transporter 1 OS=Homo sapiens GN=SLC19A2 PE=1 SV=2	1	1	1	1	0	0	0	0	0	0	0	0	1	0	0	0	0	0	0	0	0	0	0	0	0	0	0	0	1	0	0	0	0	0	0	0	0	0	0	0	0	0
O60784	O60784	5	5	5	Target of Myb protein 1	TOM1	sp|O60784|TOM1_HUMAN Target of Myb protein 1 OS=Homo sapiens GN=TOM1 PE=1 SV=2	1	5	5	5	1	0	0	0	1	1	2	1	0	1	0	1	2	1	0	0	1	0	0	0	1	1	2	1	0	1	0	1	2	1	0	0	1	0	0	0	1	1
Q99879;Q99877;Q93079;Q5QNW6;P62807;P58876;P57053;O60814;Q99880	Q99879;Q99877;Q93079;Q5QNW6;P62807;P58876;P57053;O60814;Q99880	3;3;3;3;3;3;3;3;2	3;3;3;3;3;3;3;3;2	1;1;1;1;1;1;1;1;1	Histone H2B type 1-M;Histone H2B type 1-N;Histone H2B type 1-H;Histone H2B type 2-F;Histone H2B type 1-C/E/F/G/I;Histone H2B type 1-D;Histone H2B type F-S;Histone H2B type 1-K;Histone H2B type 1-L	HIST1H2BM;HIST1H2BN;HIST1H2BH;HIST2H2BF;HIST1H2BC;HIST1H2BD;H2BFS;HIST1H2BK;HIST1H2BL	sp|Q99879|H2B1M_HUMAN Histone H2B type 1-M OS=Homo sapiens GN=HIST1H2BM PE=1 SV=3;sp|Q99877|H2B1N_HUMAN Histone H2B type 1-N OS=Homo sapiens GN=HIST1H2BN PE=1 SV=3;sp|Q93079|H2B1H_HUMAN Histone H2B type 1-H OS=Homo sapiens GN=HIST1H2BH PE=1 SV=3;sp|Q5QNW6|	9	3	3	1	1	2	2	2	1	1	3	1	3	2	1	1	0	0	1	1	1	2	2	2	1	1	3	1	3	2	1	1	0	0	1	1	0	0	0	0	0	0
O60826	O60826	5	5	5	Coiled-coil domain-containing protein 22	CCDC22	sp|O60826|CCD22_HUMAN Coiled-coil domain-containing protein 22 OS=Homo sapiens GN=CCDC22 PE=1 SV=1	1	5	5	5	4	3	3	3	1	1	4	1	3	3	1	1	1	0	1	0	4	3	3	3	1	1	4	1	3	3	1	1	1	0	1	0	4	3	3	3	1	1
O60828	O60828	4	4	4	Polyglutamine-binding protein 1	PQBP1	sp|O60828|PQBP1_HUMAN Polyglutamine-binding protein 1 OS=Homo sapiens GN=PQBP1 PE=1 SV=1	1	4	4	4	1	4	2	1	0	2	3	2	1	2	1	0	2	1	2	0	1	4	2	1	0	2	3	2	1	2	1	0	2	1	2	0	1	4	2	1	0	2
O60830	O60830	1	1	1	Mitochondrial import inner membrane translocase subunit Tim17-B	TIMM17B	sp|O60830|TI17B_HUMAN Mitochondrial import inner membrane translocase subunit Tim17-B OS=Homo sapiens GN=TIMM17B PE=1 SV=1	1	1	1	1	0	0	0	0	0	0	0	0	0	0	0	0	1	0	0	0	0	0	0	0	0	0	0	0	0	0	0	0	1	0	0	0	0	0	0	0	0	0
O60831	O60831	1	1	1	PRA1 family protein 2	PRAF2	sp|O60831|PRAF2_HUMAN PRA1 family protein 2 OS=Homo sapiens GN=PRAF2 PE=1 SV=1	1	1	1	1	1	0	1	0	1	1	0	0	1	0	0	0	1	1	0	0	1	0	1	0	1	1	0	0	1	0	0	0	1	1	0	0	1	0	1	0	1	1
O60841	O60841	8	8	8	Eukaryotic translation initiation factor 5B	EIF5B	sp|O60841|IF2P_HUMAN Eukaryotic translation initiation factor 5B OS=Homo sapiens GN=EIF5B PE=1 SV=4	1	8	8	8	2	2	1	2	0	0	3	6	2	4	0	1	2	3	1	1	2	2	1	2	0	0	3	6	2	4	0	1	2	3	1	1	2	2	1	2	0	0
O60858	O60858	2	2	2	E3 ubiquitin-protein ligase TRIM13	TRIM13	sp|O60858|TRI13_HUMAN E3 ubiquitin-protein ligase TRIM13 OS=Homo sapiens GN=TRIM13 PE=1 SV=2	1	2	2	2	0	0	1	1	0	0	1	1	2	0	0	0	1	0	0	0	0	0	1	1	0	0	1	1	2	0	0	0	1	0	0	0	0	0	1	1	0	0
O60879	O60879	2	2	2	Protein diaphanous homolog 2	DIAPH2	sp|O60879|DIAP2_HUMAN Protein diaphanous homolog 2 OS=Homo sapiens GN=DIAPH2 PE=1 SV=1	1	2	2	2	1	1	1	1	0	0	1	1	2	2	0	0	0	0	0	0	1	1	1	1	0	0	1	1	2	2	0	0	0	0	0	0	1	1	1	1	0	0
O60884	O60884	5	5	5	DnaJ homolog subfamily A member 2	DNAJA2	sp|O60884|DNJA2_HUMAN DnaJ homolog subfamily A member 2 OS=Homo sapiens GN=DNAJA2 PE=1 SV=1	1	5	5	5	3	2	3	4	1	1	2	2	3	2	1	1	4	4	2	0	3	2	3	4	1	1	2	2	3	2	1	1	4	4	2	0	3	2	3	4	1	1
O60888	O60888	2	2	2	Protein CutA	CUTA	sp|O60888|CUTA_HUMAN Protein CutA OS=Homo sapiens GN=CUTA PE=1 SV=2	1	2	2	2	1	2	1	1	1	2	2	2	1	2	1	2	1	2	1	2	1	2	1	1	1	2	2	2	1	2	1	2	1	2	1	2	1	2	1	1	1	2
O60906	O60906	1	1	1	Sphingomyelin phosphodiesterase 2	SMPD2	sp|O60906|NSMA_HUMAN Sphingomyelin phosphodiesterase 2 OS=Homo sapiens GN=SMPD2 PE=1 SV=2	1	1	1	1	0	0	0	0	0	0	0	0	0	0	1	1	0	0	1	0	0	0	0	0	0	0	0	0	0	0	1	1	0	0	1	0	0	0	0	0	0	0
O60907	O60907	2	1	1	F-box-like/WD repeat-containing protein TBL1X	TBL1X	sp|O60907|TBL1X_HUMAN F-box-like/WD repeat-containing protein TBL1X OS=Homo sapiens GN=TBL1X PE=1 SV=3	1	2	1	1	1	1	1	1	0	0	1	1	1	1	0	0	1	1	1	0	0	0	0	0	0	0	0	0	0	0	0	0	1	0	0	0	0	0	0	0	0	0
O60921	O60921	2	2	2	Checkpoint protein HUS1	HUS1	sp|O60921|HUS1_HUMAN Checkpoint protein HUS1 OS=Homo sapiens GN=HUS1 PE=1 SV=1	1	2	2	2	0	1	0	0	0	0	1	1	1	1	0	0	1	0	1	0	0	1	0	0	0	0	1	1	1	1	0	0	1	0	1	0	0	1	0	0	0	0
O60927	O60927	1	1	1	Protein phosphatase 1 regulatory subunit 11	PPP1R11	sp|O60927|PP1RB_HUMAN Protein phosphatase 1 regulatory subunit 11 OS=Homo sapiens GN=PPP1R11 PE=1 SV=1	1	1	1	1	1	0	0	0	0	0	0	0	0	0	0	0	0	0	0	0	1	0	0	0	0	0	0	0	0	0	0	0	0	0	0	0	1	0	0	0	0	0
O60930	O60930	1	1	1	Ribonuclease H1	RNASEH1	sp|O60930|RNH1_HUMAN Ribonuclease H1 OS=Homo sapiens GN=RNASEH1 PE=1 SV=2	1	1	1	1	0	0	0	0	0	0	1	0	0	1	0	0	0	0	0	0	0	0	0	0	0	0	1	0	0	1	0	0	0	0	0	0	0	0	0	0	0	0
O60934	O60934	5	5	5	Nibrin	NBN	sp|O60934|NBN_HUMAN Nibrin OS=Homo sapiens GN=NBN PE=1 SV=1	1	5	5	5	2	1	1	2	0	0	3	2	3	3	0	0	1	0	0	0	2	1	1	2	0	0	3	2	3	3	0	0	1	0	0	0	2	1	1	2	0	0
O60936	O60936	2	2	2	Nucleolar protein 3	NOL3	sp|O60936|NOL3_HUMAN Nucleolar protein 3 OS=Homo sapiens GN=NOL3 PE=1 SV=2	1	2	2	2	2	2	2	2	0	1	1	0	1	1	0	1	0	0	0	0	2	2	2	2	0	1	1	0	1	1	0	1	0	0	0	0	2	2	2	2	0	1
O75027	O75027	4	4	4	ATP-binding cassette sub-family B member 7, mitochondrial	ABCB7	sp|O75027|ABCB7_HUMAN ATP-binding cassette sub-family B member 7, mitochondrial OS=Homo sapiens GN=ABCB7 PE=1 SV=2	1	4	4	4	3	1	1	3	1	1	1	3	1	2	1	1	1	2	2	1	3	1	1	3	1	1	1	3	1	2	1	1	1	2	2	1	3	1	1	3	1	1
O75044;P0DMP2;P0DJJ0	O75044;P0DMP2;P0DJJ0	2;1;1	2;1;1	2;1;1	SLIT-ROBO Rho GTPase-activating protein 2;SLIT-ROBO Rho GTPase-activating protein 2B;SLIT-ROBO Rho GTPase-activating protein 2C	SRGAP2;SRGAP2B;SRGAP2C	sp|O75044|SRGP2_HUMAN SLIT-ROBO Rho GTPase-activating protein 2 OS=Homo sapiens GN=SRGAP2 PE=1 SV=2;sp|P0DMP2|SRG2B_HUMAN SLIT-ROBO Rho GTPase-activating protein 2B OS=Homo sapiens GN=SRGAP2B PE=3 SV=1;sp|P0DJJ0|SRG2C_HUMAN SLIT-ROBO Rho GTPase-activating	3	2	2	2	0	0	0	1	0	0	0	0	0	0	0	0	0	1	0	0	0	0	0	1	0	0	0	0	0	0	0	0	0	1	0	0	0	0	0	1	0	0
O75061	O75061	2	2	2	Putative tyrosine-protein phosphatase auxilin	DNAJC6	sp|O75061|AUXI_HUMAN Putative tyrosine-protein phosphatase auxilin OS=Homo sapiens GN=DNAJC6 PE=1 SV=3	1	2	2	2	1	0	0	0	0	0	0	0	1	0	0	0	0	0	0	0	1	0	0	0	0	0	0	0	1	0	0	0	0	0	0	0	1	0	0	0	0	0
O75063	O75063	3	3	3	Glycosaminoglycan xylosylkinase	FAM20B	sp|O75063|XYLK_HUMAN Glycosaminoglycan xylosylkinase OS=Homo sapiens GN=FAM20B PE=1 SV=1	1	3	3	3	0	0	1	1	0	0	1	0	0	1	0	0	2	1	0	0	0	0	1	1	0	0	1	0	0	1	0	0	2	1	0	0	0	0	1	1	0	0
O75071	O75071	2	2	2	EF-hand calcium-binding domain-containing protein 14	EFCAB14	sp|O75071|EFC14_HUMAN EF-hand calcium-binding domain-containing protein 14 OS=Homo sapiens GN=EFCAB14 PE=2 SV=1	1	2	2	2	0	0	2	2	0	0	1	0	0	0	0	0	0	0	0	0	0	0	2	2	0	0	1	0	0	0	0	0	0	0	0	0	0	0	2	2	0	0
O75083	O75083	10	10	10	WD repeat-containing protein 1	WDR1	sp|O75083|WDR1_HUMAN WD repeat-containing protein 1 OS=Homo sapiens GN=WDR1 PE=1 SV=4	1	10	10	10	7	7	6	7	5	5	8	7	8	8	5	4	8	8	7	3	7	7	6	7	5	5	8	7	8	8	5	4	8	8	7	3	7	7	6	7	5	5
O75116	O75116	5	5	4	Rho-associated protein kinase 2	ROCK2	sp|O75116|ROCK2_HUMAN Rho-associated protein kinase 2 OS=Homo sapiens GN=ROCK2 PE=1 SV=4	1	5	5	4	3	3	1	0	2	1	0	1	2	2	1	0	1	1	3	0	3	3	1	0	2	1	0	1	2	2	1	0	1	1	3	0	3	3	1	0	1	0
O75122	O75122	3	3	3	CLIP-associating protein 2	CLASP2	sp|O75122|CLAP2_HUMAN CLIP-associating protein 2 OS=Homo sapiens GN=CLASP2 PE=1 SV=2	1	3	3	3	0	2	0	0	1	0	2	1	1	0	0	1	1	0	1	0	0	2	0	0	1	0	2	1	1	0	0	1	1	0	1	0	0	2	0	0	1	0
O75127	O75127	1	1	1	Pentatricopeptide repeat-containing protein 1, mitochondrial	PTCD1	sp|O75127|PTCD1_HUMAN Pentatricopeptide repeat-containing protein 1, mitochondrial OS=Homo sapiens GN=PTCD1 PE=1 SV=2	1	1	1	1	1	0	1	0	0	0	1	1	0	0	0	0	0	0	0	0	1	0	1	0	0	0	1	1	0	0	0	0	0	0	0	0	1	0	1	0	0	0
O75131	O75131	6	6	6	Copine-3	CPNE3	sp|O75131|CPNE3_HUMAN Copine-3 OS=Homo sapiens GN=CPNE3 PE=1 SV=1	1	6	6	6	4	3	4	4	3	4	4	4	3	4	4	3	4	5	4	1	4	3	4	4	3	4	4	4	3	4	4	3	4	5	4	1	4	3	4	4	3	4
O75144	O75144	1	1	1	ICOS ligand	ICOSLG	sp|O75144|ICOSL_HUMAN ICOS ligand OS=Homo sapiens GN=ICOSLG PE=1 SV=2	1	1	1	1	1	1	0	1	0	0	1	0	0	0	0	0	1	0	0	0	1	1	0	1	0	0	1	0	0	0	0	0	1	0	0	0	1	1	0	1	0	0
O75146	O75146	1	1	1	Huntingtin-interacting protein 1-related protein	HIP1R	sp|O75146|HIP1R_HUMAN Huntingtin-interacting protein 1-related protein OS=Homo sapiens GN=HIP1R PE=1 SV=2	1	1	1	1	0	0	0	0	0	0	0	1	0	0	0	0	0	0	0	0	0	0	0	0	0	0	0	1	0	0	0	0	0	0	0	0	0	0	0	0	0	0
O75147	O75147	1	1	1	Obscurin-like protein 1	OBSL1	sp|O75147|OBSL1_HUMAN Obscurin-like protein 1 OS=Homo sapiens GN=OBSL1 PE=1 SV=4	1	1	1	1	0	1	0	1	1	0	0	0	0	1	0	1	1	1	0	0	0	1	0	1	1	0	0	0	0	1	0	1	1	1	0	0	0	1	0	1	1	0
O75150	O75150	4	4	4	E3 ubiquitin-protein ligase BRE1B	RNF40	sp|O75150|BRE1B_HUMAN E3 ubiquitin-protein ligase BRE1B OS=Homo sapiens GN=RNF40 PE=1 SV=4	1	4	4	4	0	0	0	0	0	0	1	1	0	1	0	1	0	1	0	0	0	0	0	0	0	0	1	1	0	1	0	1	0	1	0	0	0	0	0	0	0	0
O75152	O75152	2	2	2	Zinc finger CCCH domain-containing protein 11A	ZC3H11A	sp|O75152|ZC11A_HUMAN Zinc finger CCCH domain-containing protein 11A OS=Homo sapiens GN=ZC3H11A PE=1 SV=3	1	2	2	2	0	0	2	1	0	0	0	0	0	0	0	0	0	0	0	0	0	0	2	1	0	0	0	0	0	0	0	0	0	0	0	0	0	0	2	1	0	0
O75153	O75153	12	12	12	Clustered mitochondria protein homolog	CLUH	sp|O75153|CLU_HUMAN Clustered mitochondria protein homolog OS=Homo sapiens GN=CLUH PE=1 SV=2	1	12	12	12	3	5	5	5	1	0	7	3	7	9	1	0	4	1	2	0	3	5	5	5	1	0	7	3	7	9	1	0	4	1	2	0	3	5	5	5	1	0
O75157	O75157	2	2	2	TSC22 domain family protein 2	TSC22D2	sp|O75157|T22D2_HUMAN TSC22 domain family protein 2 OS=Homo sapiens GN=TSC22D2 PE=1 SV=3	1	2	2	2	1	1	0	0	0	0	0	1	0	0	0	0	0	0	0	1	1	1	0	0	0	0	0	1	0	0	0	0	0	0	0	1	1	1	0	0	0	0
O75165	O75165	9	9	9	DnaJ homolog subfamily C member 13	DNAJC13	sp|O75165|DJC13_HUMAN DnaJ homolog subfamily C member 13 OS=Homo sapiens GN=DNAJC13 PE=1 SV=5	1	9	9	9	1	1	1	1	0	1	3	6	1	3	0	2	3	0	1	0	1	1	1	1	0	1	3	6	1	3	0	2	3	0	1	0	1	1	1	1	0	1
O75170	O75170	2	2	2	Serine/threonine-protein phosphatase 6 regulatory subunit 2	PPP6R2	sp|O75170|PP6R2_HUMAN Serine/threonine-protein phosphatase 6 regulatory subunit 2 OS=Homo sapiens GN=PPP6R2 PE=1 SV=2	1	2	2	2	1	1	1	2	0	0	1	1	2	2	0	0	0	0	1	0	1	1	1	2	0	0	1	1	2	2	0	0	0	0	1	0	1	1	1	2	0	0
O75175	O75175	2	2	2	CCR4-NOT transcription complex subunit 3	CNOT3	sp|O75175|CNOT3_HUMAN CCR4-NOT transcription complex subunit 3 OS=Homo sapiens GN=CNOT3 PE=1 SV=1	1	2	2	2	2	1	1	1	0	0	1	1	1	1	1	1	1	0	1	0	2	1	1	1	0	0	1	1	1	1	1	1	1	0	1	0	2	1	1	1	0	0
O75179	O75179	3	3	3	Ankyrin repeat domain-containing protein 17	ANKRD17	sp|O75179|ANR17_HUMAN Ankyrin repeat domain-containing protein 17 OS=Homo sapiens GN=ANKRD17 PE=1 SV=3	1	3	3	3	0	0	1	1	1	1	1	0	2	2	0	1	1	1	0	0	0	0	1	1	1	1	1	0	2	2	0	1	1	1	0	0	0	0	1	1	1	1
O75182	O75182	1	1	1	Paired amphipathic helix protein Sin3b	SIN3B	sp|O75182|SIN3B_HUMAN Paired amphipathic helix protein Sin3b OS=Homo sapiens GN=SIN3B PE=1 SV=2	1	1	1	1	0	0	0	0	0	0	0	0	1	0	0	0	0	0	0	0	0	0	0	0	0	0	0	0	1	0	0	0	0	0	0	0	0	0	0	0	0	0
O75190	O75190	2	2	2	DnaJ homolog subfamily B member 6	DNAJB6	sp|O75190|DNJB6_HUMAN DnaJ homolog subfamily B member 6 OS=Homo sapiens GN=DNAJB6 PE=1 SV=2	1	2	2	2	1	1	0	0	1	1	0	0	0	1	1	1	1	1	2	1	1	1	0	0	1	1	0	0	0	1	1	1	1	1	2	1	1	1	0	0	1	1
O75208	O75208	1	1	1	Ubiquinone biosynthesis protein COQ9, mitochondrial	COQ9	sp|O75208|COQ9_HUMAN Ubiquinone biosynthesis protein COQ9, mitochondrial OS=Homo sapiens GN=COQ9 PE=1 SV=1	1	1	1	1	0	0	0	0	0	1	1	0	1	1	0	0	1	0	0	0	0	0	0	0	0	1	1	0	1	1	0	0	1	0	0	0	0	0	0	0	0	1
O75223	O75223	2	2	2	Gamma-glutamylcyclotransferase	GGCT	sp|O75223|GGCT_HUMAN Gamma-glutamylcyclotransferase OS=Homo sapiens GN=GGCT PE=1 SV=1	1	2	2	2	1	1	0	0	0	0	1	0	1	1	0	0	2	1	1	0	1	1	0	0	0	0	1	0	1	1	0	0	2	1	1	0	1	1	0	0	0	0
O75251	O75251	1	1	1	NADH dehydrogenase [ubiquinone] iron-sulfur protein 7, mitochondrial	NDUFS7	sp|O75251|NDUS7_HUMAN NADH dehydrogenase [ubiquinone] iron-sulfur protein 7, mitochondrial OS=Homo sapiens GN=NDUFS7 PE=1 SV=3	1	1	1	1	1	0	1	0	0	0	1	1	0	0	0	0	0	1	0	0	1	0	1	0	0	0	1	1	0	0	0	0	0	1	0	0	1	0	1	0	0	0
O75306	O75306	7	7	7	NADH dehydrogenase [ubiquinone] iron-sulfur protein 2, mitochondrial	NDUFS2	sp|O75306|NDUS2_HUMAN NADH dehydrogenase [ubiquinone] iron-sulfur protein 2, mitochondrial OS=Homo sapiens GN=NDUFS2 PE=1 SV=2	1	7	7	7	6	4	6	5	2	3	4	4	2	3	2	3	3	4	1	3	6	4	6	5	2	3	4	4	2	3	2	3	3	4	1	3	6	4	6	5	2	3
O75312	O75312	4	4	4	Zinc finger protein ZPR1	ZPR1	sp|O75312|ZPR1_HUMAN Zinc finger protein ZPR1 OS=Homo sapiens GN=ZPR1 PE=1 SV=1	1	4	4	4	2	1	2	3	0	0	2	1	4	2	0	0	1	0	0	0	2	1	2	3	0	0	2	1	4	2	0	0	1	0	0	0	2	1	2	3	0	0
O75330	O75330	1	1	1	Hyaluronan mediated motility receptor	HMMR	sp|O75330|HMMR_HUMAN Hyaluronan mediated motility receptor OS=Homo sapiens GN=HMMR PE=1 SV=2	1	1	1	1	0	0	0	0	0	0	0	0	0	0	0	0	1	0	1	0	0	0	0	0	0	0	0	0	0	0	0	0	1	0	1	0	0	0	0	0	0	0
O75340	O75340	4	4	4	Programmed cell death protein 6	PDCD6	sp|O75340|PDCD6_HUMAN Programmed cell death protein 6 OS=Homo sapiens GN=PDCD6 PE=1 SV=1	1	4	4	4	2	1	0	1	0	0	1	1	0	0	0	0	1	2	0	0	2	1	0	1	0	0	1	1	0	0	0	0	1	2	0	0	2	1	0	1	0	0
O75348	O75348	1	1	1	V-type proton ATPase subunit G 1	ATP6V1G1	sp|O75348|VATG1_HUMAN V-type proton ATPase subunit G 1 OS=Homo sapiens GN=ATP6V1G1 PE=1 SV=3	1	1	1	1	0	0	0	0	0	0	0	0	0	0	0	0	1	1	0	0	0	0	0	0	0	0	0	0	0	0	0	0	1	1	0	0	0	0	0	0	0	0
O75351	O75351	3	3	3	Vacuolar protein sorting-associated protein 4B	VPS4B	sp|O75351|VPS4B_HUMAN Vacuolar protein sorting-associated protein 4B OS=Homo sapiens GN=VPS4B PE=1 SV=2	1	3	3	3	1	2	1	2	0	0	2	2	2	1	0	0	2	1	1	0	1	2	1	2	0	0	2	2	2	1	0	0	2	1	1	0	1	2	1	2	0	0
O75367	O75367	3	3	3	Core histone macro-H2A.1	H2AFY	sp|O75367|H2AY_HUMAN Core histone macro-H2A.1 OS=Homo sapiens GN=H2AFY PE=1 SV=4	1	3	3	3	1	1	2	2	2	2	2	2	2	2	2	2	2	3	2	1	1	1	2	2	2	2	2	2	2	2	2	2	2	3	2	1	1	1	2	2	2	2
O75369	O75369	41	39	39	Filamin-B	FLNB	sp|O75369|FLNB_HUMAN Filamin-B OS=Homo sapiens GN=FLNB PE=1 SV=2	1	41	39	39	33	30	24	28	18	16	32	31	28	31	15	18	28	26	22	7	31	28	24	26	18	15	30	30	27	30	15	17	27	26	22	7	31	28	24	26	18	15
O75376	O75376	4	4	4	Nuclear receptor corepressor 1	NCOR1	sp|O75376|NCOR1_HUMAN Nuclear receptor corepressor 1 OS=Homo sapiens GN=NCOR1 PE=1 SV=2	1	4	4	4	0	1	2	1	0	0	2	0	2	2	0	0	0	0	0	0	0	1	2	1	0	0	2	0	2	2	0	0	0	0	0	0	0	1	2	1	0	0
O75380	O75380	1	1	1	NADH dehydrogenase [ubiquinone] iron-sulfur protein 6, mitochondrial	NDUFS6	sp|O75380|NDUS6_HUMAN NADH dehydrogenase [ubiquinone] iron-sulfur protein 6, mitochondrial OS=Homo sapiens GN=NDUFS6 PE=1 SV=1	1	1	1	1	0	1	0	1	0	0	1	1	0	0	0	1	1	1	0	0	0	1	0	1	0	0	1	1	0	0	0	1	1	1	0	0	0	1	0	1	0	0
O75381	O75381	8	8	7	Peroxisomal membrane protein PEX14	PEX14	sp|O75381|PEX14_HUMAN Peroxisomal membrane protein PEX14 OS=Homo sapiens GN=PEX14 PE=1 SV=1	1	8	8	7	3	4	3	3	2	2	4	3	4	4	2	2	3	0	3	0	3	4	3	3	2	2	4	3	4	4	2	2	3	0	3	0	3	4	3	3	2	2
O75382	O75382	3	3	3	Tripartite motif-containing protein 3	TRIM3	sp|O75382|TRIM3_HUMAN Tripartite motif-containing protein 3 OS=Homo sapiens GN=TRIM3 PE=1 SV=2	1	3	3	3	0	0	0	1	0	0	1	1	0	1	0	0	0	1	0	1	0	0	0	1	0	0	1	1	0	1	0	0	0	1	0	1	0	0	0	1	0	0
O75390	O75390	3	3	3	Citrate synthase, mitochondrial	CS	sp|O75390|CISY_HUMAN Citrate synthase, mitochondrial OS=Homo sapiens GN=CS PE=1 SV=2	1	3	3	3	3	3	3	3	2	2	3	3	1	2	2	2	2	1	2	1	3	3	3	3	2	2	3	3	1	2	2	2	2	1	2	1	3	3	3	3	2	2
O75391	O75391	1	1	1	Sperm-associated antigen 7	SPAG7	sp|O75391|SPAG7_HUMAN Sperm-associated antigen 7 OS=Homo sapiens GN=SPAG7 PE=1 SV=2	1	1	1	1	0	0	0	0	0	0	0	0	0	1	0	0	0	0	0	0	0	0	0	0	0	0	0	0	0	1	0	0	0	0	0	0	0	0	0	0	0	0
O75396	O75396	2	2	2	Vesicle-trafficking protein SEC22b	SEC22B	sp|O75396|SC22B_HUMAN Vesicle-trafficking protein SEC22b OS=Homo sapiens GN=SEC22B PE=1 SV=4	1	2	2	2	1	1	1	1	1	1	1	2	1	1	1	1	1	1	1	1	1	1	1	1	1	1	1	2	1	1	1	1	1	1	1	1	1	1	1	1	1	1
O75400	O75400	4	4	4	Pre-mRNA-processing factor 40 homolog A	PRPF40A	sp|O75400|PR40A_HUMAN Pre-mRNA-processing factor 40 homolog A OS=Homo sapiens GN=PRPF40A PE=1 SV=2	1	4	4	4	1	2	2	2	1	1	3	1	3	3	1	1	1	1	1	0	1	2	2	2	1	1	3	1	3	3	1	1	1	1	1	0	1	2	2	2	1	1
O75410	O75410	9	9	9	Transforming acidic coiled-coil-containing protein 1	TACC1	sp|O75410|TACC1_HUMAN Transforming acidic coiled-coil-containing protein 1 OS=Homo sapiens GN=TACC1 PE=1 SV=2	1	9	9	9	5	4	7	4	2	2	6	3	4	5	5	7	6	3	7	0	5	4	7	4	2	2	6	3	4	5	5	7	6	3	7	0	5	4	7	4	2	2
O75419	O75419	1	1	1	Cell division control protein 45 homolog	CDC45	sp|O75419|CDC45_HUMAN Cell division control protein 45 homolog OS=Homo sapiens GN=CDC45 PE=1 SV=1	1	1	1	1	0	1	0	0	0	0	0	0	0	0	0	0	0	0	0	0	0	1	0	0	0	0	0	0	0	0	0	0	0	0	0	0	0	1	0	0	0	0
O75427	O75427	4	4	4	Leucine-rich repeat and calponin homology domain-containing protein 4	LRCH4	sp|O75427|LRCH4_HUMAN Leucine-rich repeat and calponin homology domain-containing protein 4 OS=Homo sapiens GN=LRCH4 PE=1 SV=2	1	4	4	4	1	0	1	3	1	1	1	2	1	1	1	0	3	1	1	0	1	0	1	3	1	1	1	2	1	1	1	0	3	1	1	0	1	0	1	3	1	1
O75431	O75431	6	6	6	Metaxin-2	MTX2	sp|O75431|MTX2_HUMAN Metaxin-2 OS=Homo sapiens GN=MTX2 PE=1 SV=1	1	6	6	6	2	2	3	2	0	3	5	4	2	2	1	1	4	5	2	3	2	2	3	2	0	3	5	4	2	2	1	1	4	5	2	3	2	2	3	2	0	3
O75436	O75436	2	2	1	Vacuolar protein sorting-associated protein 26A	VPS26A	sp|O75436|VP26A_HUMAN Vacuolar protein sorting-associated protein 26A OS=Homo sapiens GN=VPS26A PE=1 SV=2	1	2	2	1	0	0	0	0	0	0	0	1	0	0	0	0	0	0	0	0	0	0	0	0	0	0	0	1	0	0	0	0	0	0	0	0	0	0	0	0	0	0
O75439	O75439	5	5	5	Mitochondrial-processing peptidase subunit beta	PMPCB	sp|O75439|MPPB_HUMAN Mitochondrial-processing peptidase subunit beta OS=Homo sapiens GN=PMPCB PE=1 SV=2	1	5	5	5	3	3	4	4	1	2	3	3	3	3	2	2	3	4	3	1	3	3	4	4	1	2	3	3	3	3	2	2	3	4	3	1	3	3	4	4	1	2
O75448	O75448	3	3	3	Mediator of RNA polymerase II transcription subunit 24	MED24	sp|O75448|MED24_HUMAN Mediator of RNA polymerase II transcription subunit 24 OS=Homo sapiens GN=MED24 PE=1 SV=1	1	3	3	3	1	2	0	1	1	0	0	0	1	2	0	0	0	0	1	0	1	2	0	1	1	0	0	0	1	2	0	0	0	0	1	0	1	2	0	1	1	0
O75449	O75449	1	1	1	Katanin p60 ATPase-containing subunit A1	KATNA1	sp|O75449|KTNA1_HUMAN Katanin p60 ATPase-containing subunit A1 OS=Homo sapiens GN=KATNA1 PE=1 SV=1	1	1	1	1	1	0	0	0	0	0	1	0	0	0	0	0	0	0	0	0	1	0	0	0	0	0	1	0	0	0	0	0	0	0	0	0	1	0	0	0	0	0
O75475	O75475	1	1	1	PC4 and SFRS1-interacting protein	PSIP1	sp|O75475|PSIP1_HUMAN PC4 and SFRS1-interacting protein OS=Homo sapiens GN=PSIP1 PE=1 SV=1	1	1	1	1	0	1	0	1	0	0	1	1	0	0	0	0	0	0	0	0	0	1	0	1	0	0	1	1	0	0	0	0	0	0	0	0	0	1	0	1	0	0
O75477	O75477	4	4	4	Erlin-1	ERLIN1	sp|O75477|ERLN1_HUMAN Erlin-1 OS=Homo sapiens GN=ERLIN1 PE=1 SV=1	1	4	4	4	0	2	0	2	1	1	2	3	0	0	0	2	1	2	0	0	0	2	0	2	1	1	2	3	0	0	0	2	1	2	0	0	0	2	0	2	1	1
O75496	O75496	1	1	1	Geminin	GMNN	sp|O75496|GEMI_HUMAN Geminin OS=Homo sapiens GN=GMNN PE=1 SV=1	1	1	1	1	0	0	0	0	0	1	0	0	0	0	0	0	1	0	0	0	0	0	0	0	0	1	0	0	0	0	0	0	1	0	0	0	0	0	0	0	0	1
O75506	O75506	2	2	2	Heat shock factor-binding protein 1	HSBP1	sp|O75506|HSBP1_HUMAN Heat shock factor-binding protein 1 OS=Homo sapiens GN=HSBP1 PE=1 SV=1	1	2	2	2	1	2	2	1	1	1	2	2	1	1	1	1	2	2	1	1	1	2	2	1	1	1	2	2	1	1	1	1	2	2	1	1	1	2	2	1	1	1
O75509	O75509	1	1	1	Tumor necrosis factor receptor superfamily member 21	TNFRSF21	sp|O75509|TNR21_HUMAN Tumor necrosis factor receptor superfamily member 21 OS=Homo sapiens GN=TNFRSF21 PE=1 SV=1	1	1	1	1	0	0	1	1	0	0	0	0	0	0	0	0	0	0	0	0	0	0	1	1	0	0	0	0	0	0	0	0	0	0	0	0	0	0	1	1	0	0
O75521	O75521	6	6	6	Enoyl-CoA delta isomerase 2, mitochondrial	ECI2	sp|O75521|ECI2_HUMAN Enoyl-CoA delta isomerase 2, mitochondrial OS=Homo sapiens GN=ECI2 PE=1 SV=4	1	6	6	6	3	5	2	2	2	2	4	3	3	1	2	2	2	4	2	0	3	5	2	2	2	2	4	3	3	1	2	2	2	4	2	0	3	5	2	2	2	2
O75528	O75528	1	1	1	Transcriptional adapter 3	TADA3	sp|O75528|TADA3_HUMAN Transcriptional adapter 3 OS=Homo sapiens GN=TADA3 PE=1 SV=1	1	1	1	1	1	1	1	1	0	0	0	0	1	1	0	0	0	0	0	0	1	1	1	1	0	0	0	0	1	1	0	0	0	0	0	0	1	1	1	1	0	0
O75529	O75529	2	2	2	TAF5-like RNA polymerase II p300/CBP-associated factor-associated factor 65 kDa subunit 5L	TAF5L	sp|O75529|TAF5L_HUMAN TAF5-like RNA polymerase II p300/CBP-associated factor-associated factor 65 kDa subunit 5L OS=Homo sapiens GN=TAF5L PE=1 SV=1	1	2	2	2	2	1	1	1	0	0	1	0	2	1	0	0	0	0	0	0	2	1	1	1	0	0	1	0	2	1	0	0	0	0	0	0	2	1	1	1	0	0
O75531	O75531	1	1	1	Barrier-to-autointegration factor;Barrier-to-autointegration factor, N-terminally processed	BANF1	sp|O75531|BAF_HUMAN Barrier-to-autointegration factor OS=Homo sapiens GN=BANF1 PE=1 SV=1	1	1	1	1	1	1	0	0	0	0	1	0	0	0	0	0	0	0	0	0	1	1	0	0	0	0	1	0	0	0	0	0	0	0	0	0	1	1	0	0	0	0
O75533	O75533	16	16	16	Splicing factor 3B subunit 1	SF3B1	sp|O75533|SF3B1_HUMAN Splicing factor 3B subunit 1 OS=Homo sapiens GN=SF3B1 PE=1 SV=3	1	16	16	16	9	9	4	9	6	6	11	12	11	9	6	6	9	6	6	1	9	9	4	9	6	6	11	12	11	9	6	6	9	6	6	1	9	9	4	9	6	6
O75534	O75534	3	3	3	Cold shock domain-containing protein E1	CSDE1	sp|O75534|CSDE1_HUMAN Cold shock domain-containing protein E1 OS=Homo sapiens GN=CSDE1 PE=1 SV=2	1	3	3	3	2	3	2	1	0	0	1	1	1	1	2	1	3	1	2	1	2	3	2	1	0	0	1	1	1	1	2	1	3	1	2	1	2	3	2	1	0	0
O75554	O75554	1	1	1	WW domain-binding protein 4	WBP4	sp|O75554|WBP4_HUMAN WW domain-binding protein 4 OS=Homo sapiens GN=WBP4 PE=1 SV=1	1	1	1	1	0	0	1	1	0	0	1	0	1	1	0	0	0	0	0	0	0	0	1	1	0	0	1	0	1	1	0	0	0	0	0	0	0	0	1	1	0	0
O75569	O75569	2	2	2	Interferon-inducible double-stranded RNA-dependent protein kinase activator A	PRKRA	sp|O75569|PRKRA_HUMAN Interferon-inducible double-stranded RNA-dependent protein kinase activator A OS=Homo sapiens GN=PRKRA PE=1 SV=1	1	2	2	2	1	0	0	1	1	2	1	0	1	0	0	1	0	1	0	0	1	0	0	1	1	2	1	0	1	0	0	1	0	1	0	0	1	0	0	1	1	2
O75575	O75575	2	2	2	DNA-directed RNA polymerase III subunit RPC9	CRCP	sp|O75575|RPC9_HUMAN DNA-directed RNA polymerase III subunit RPC9 OS=Homo sapiens GN=CRCP PE=1 SV=1	1	2	2	2	0	0	0	0	0	0	0	1	1	1	0	0	0	1	0	0	0	0	0	0	0	0	0	1	1	1	0	0	0	1	0	0	0	0	0	0	0	0
O75581	O75581	1	1	1	Low-density lipoprotein receptor-related protein 6	LRP6	sp|O75581|LRP6_HUMAN Low-density lipoprotein receptor-related protein 6 OS=Homo sapiens GN=LRP6 PE=1 SV=2	1	1	1	1	0	0	0	0	0	0	0	1	0	0	0	0	0	0	0	0	0	0	0	0	0	0	0	1	0	0	0	0	0	0	0	0	0	0	0	0	0	0
O75586	O75586	2	2	2	Mediator of RNA polymerase II transcription subunit 6	MED6	sp|O75586|MED6_HUMAN Mediator of RNA polymerase II transcription subunit 6 OS=Homo sapiens GN=MED6 PE=1 SV=2	1	2	2	2	0	0	0	0	0	0	0	1	1	0	0	0	1	0	0	0	0	0	0	0	0	0	0	1	1	0	0	0	1	0	0	0	0	0	0	0	0	0
O75592	O75592	4	4	4	E3 ubiquitin-protein ligase MYCBP2	MYCBP2	sp|O75592|MYCB2_HUMAN E3 ubiquitin-protein ligase MYCBP2 OS=Homo sapiens GN=MYCBP2 PE=1 SV=3	1	4	4	4	2	1	1	2	0	0	1	0	1	1	0	0	2	0	0	0	2	1	1	2	0	0	1	0	1	1	0	0	2	0	0	0	2	1	1	2	0	0
O75607	O75607	2	2	2	Nucleoplasmin-3	NPM3	sp|O75607|NPM3_HUMAN Nucleoplasmin-3 OS=Homo sapiens GN=NPM3 PE=1 SV=3	1	2	2	2	1	1	2	2	0	0	2	2	1	2	0	0	2	2	0	0	1	1	2	2	0	0	2	2	1	2	0	0	2	2	0	0	1	1	2	2	0	0
O75608	O75608	4	4	4	Acyl-protein thioesterase 1	LYPLA1	sp|O75608|LYPA1_HUMAN Acyl-protein thioesterase 1 OS=Homo sapiens GN=LYPLA1 PE=1 SV=1	1	4	4	4	3	2	2	2	0	1	4	3	4	3	1	1	1	1	1	0	3	2	2	2	0	1	4	3	4	3	1	1	1	1	1	0	3	2	2	2	0	1
O75635	O75635	1	1	1	Serpin B7	SERPINB7	sp|O75635|SPB7_HUMAN Serpin B7 OS=Homo sapiens GN=SERPINB7 PE=1 SV=1	1	1	1	1	0	0	0	0	0	0	1	0	0	1	0	0	1	0	1	0	0	0	0	0	0	0	1	0	0	1	0	0	1	0	1	0	0	0	0	0	0	0
O75643	O75643	16	16	16	U5 small nuclear ribonucleoprotein 200 kDa helicase	SNRNP200	sp|O75643|U520_HUMAN U5 small nuclear ribonucleoprotein 200 kDa helicase OS=Homo sapiens GN=SNRNP200 PE=1 SV=2	1	16	16	16	4	5	3	3	4	3	6	5	7	5	3	4	5	9	4	3	4	5	3	3	4	3	6	5	7	5	3	4	5	9	4	3	4	5	3	3	4	3
O75648	O75648	1	1	1	Mitochondrial tRNA-specific 2-thiouridylase 1	TRMU	sp|O75648|MTU1_HUMAN Mitochondrial tRNA-specific 2-thiouridylase 1 OS=Homo sapiens GN=TRMU PE=1 SV=2	1	1	1	1	0	0	0	0	0	0	0	0	0	0	0	0	1	0	0	0	0	0	0	0	0	0	0	0	0	0	0	0	1	0	0	0	0	0	0	0	0	0
O75663	O75663	2	2	2	TIP41-like protein	TIPRL	sp|O75663|TIPRL_HUMAN TIP41-like protein OS=Homo sapiens GN=TIPRL PE=1 SV=2	1	2	2	2	0	0	0	0	0	0	0	0	2	1	1	1	1	0	1	0	0	0	0	0	0	0	0	0	2	1	1	1	1	0	1	0	0	0	0	0	0	0
O75674	O75674	4	4	4	TOM1-like protein 1	TOM1L1	sp|O75674|TM1L1_HUMAN TOM1-like protein 1 OS=Homo sapiens GN=TOM1L1 PE=1 SV=2	1	4	4	4	1	1	1	2	0	0	1	2	3	2	0	0	1	0	0	0	1	1	1	2	0	0	1	2	3	2	0	0	1	0	0	0	1	1	1	2	0	0
O75676	O75676	2	2	2	Ribosomal protein S6 kinase alpha-4	RPS6KA4	sp|O75676|KS6A4_HUMAN Ribosomal protein S6 kinase alpha-4 OS=Homo sapiens GN=RPS6KA4 PE=1 SV=1	1	2	2	2	1	0	1	0	0	0	1	0	1	1	0	0	0	0	0	0	1	0	1	0	0	0	1	0	1	1	0	0	0	0	0	0	1	0	1	0	0	0
O75683	O75683	2	2	2	Surfeit locus protein 6	SURF6	sp|O75683|SURF6_HUMAN Surfeit locus protein 6 OS=Homo sapiens GN=SURF6 PE=1 SV=3	1	2	2	2	2	2	0	1	2	2	2	1	1	0	2	2	2	1	0	0	2	2	0	1	2	2	2	1	1	0	2	2	2	1	0	0	2	2	0	1	2	2
O75688	O75688	1	1	1	Protein phosphatase 1B	PPM1B	sp|O75688|PPM1B_HUMAN Protein phosphatase 1B OS=Homo sapiens GN=PPM1B PE=1 SV=1	1	1	1	1	0	1	1	1	1	1	1	0	0	0	0	0	0	0	0	0	0	1	1	1	1	1	1	0	0	0	0	0	0	0	0	0	0	1	1	1	1	1
O75691	O75691	15	15	15	Small subunit processome component 20 homolog	UTP20	sp|O75691|UTP20_HUMAN Small subunit processome component 20 homolog OS=Homo sapiens GN=UTP20 PE=1 SV=3	1	15	15	15	7	7	4	4	1	3	9	3	4	4	2	1	7	5	6	0	7	7	4	4	1	3	9	3	4	4	2	1	7	5	6	0	7	7	4	4	1	3
O75694	O75694	14	14	14	Nuclear pore complex protein Nup155	NUP155	sp|O75694|NU155_HUMAN Nuclear pore complex protein Nup155 OS=Homo sapiens GN=NUP155 PE=1 SV=1	1	14	14	14	2	3	3	2	1	4	6	7	4	7	4	2	5	5	1	1	2	3	3	2	1	4	6	7	4	7	4	2	5	5	1	1	2	3	3	2	1	4
O75695	O75695	5	5	5	Protein XRP2	RP2	sp|O75695|XRP2_HUMAN Protein XRP2 OS=Homo sapiens GN=RP2 PE=1 SV=4	1	5	5	5	1	1	1	1	1	2	3	2	1	2	1	2	3	1	1	1	1	1	1	1	1	2	3	2	1	2	1	2	3	1	1	1	1	1	1	1	1	2
O75717	O75717	7	7	7	WD repeat and HMG-box DNA-binding protein 1	WDHD1	sp|O75717|WDHD1_HUMAN WD repeat and HMG-box DNA-binding protein 1 OS=Homo sapiens GN=WDHD1 PE=1 SV=1	1	7	7	7	2	1	2	2	1	0	4	2	3	2	0	1	2	0	2	1	2	1	2	2	1	0	4	2	3	2	0	1	2	0	2	1	2	1	2	2	1	0
O75718	O75718	1	1	1	Cartilage-associated protein	CRTAP	sp|O75718|CRTAP_HUMAN Cartilage-associated protein OS=Homo sapiens GN=CRTAP PE=1 SV=1	1	1	1	1	0	0	0	0	1	1	1	1	1	1	1	1	1	1	1	1	0	0	0	0	1	1	1	1	1	1	1	1	1	1	1	1	0	0	0	0	1	1
O75746	O75746	1	1	1	Calcium-binding mitochondrial carrier protein Aralar1	SLC25A12	sp|O75746|CMC1_HUMAN Calcium-binding mitochondrial carrier protein Aralar1 OS=Homo sapiens GN=SLC25A12 PE=1 SV=2	1	1	1	1	0	0	0	0	0	0	0	1	0	0	0	0	0	0	0	0	0	0	0	0	0	0	0	1	0	0	0	0	0	0	0	0	0	0	0	0	0	0
O75787	O75787	3	3	3	Renin receptor	ATP6AP2	sp|O75787|RENR_HUMAN Renin receptor OS=Homo sapiens GN=ATP6AP2 PE=1 SV=2	1	3	3	3	1	1	1	0	1	1	2	2	0	1	1	2	2	1	0	0	1	1	1	0	1	1	2	2	0	1	1	2	2	1	0	0	1	1	1	0	1	1
O75792	O75792	3	3	3	Ribonuclease H2 subunit A	RNASEH2A	sp|O75792|RNH2A_HUMAN Ribonuclease H2 subunit A OS=Homo sapiens GN=RNASEH2A PE=1 SV=2	1	3	3	3	3	3	2	1	2	1	3	3	3	1	0	1	2	1	0	0	3	3	2	1	2	1	3	3	3	1	0	1	2	1	0	0	3	3	2	1	2	1
O75794	O75794	1	1	1	Cell division cycle protein 123 homolog	CDC123	sp|O75794|CD123_HUMAN Cell division cycle protein 123 homolog OS=Homo sapiens GN=CDC123 PE=1 SV=1	1	1	1	1	0	0	0	0	0	0	0	0	0	0	0	0	1	0	0	0	0	0	0	0	0	0	0	0	0	0	0	0	1	0	0	0	0	0	0	0	0	0
O75815	O75815	3	3	3	Breast cancer anti-estrogen resistance protein 3	BCAR3	sp|O75815|BCAR3_HUMAN Breast cancer anti-estrogen resistance protein 3 OS=Homo sapiens GN=BCAR3 PE=1 SV=1	1	3	3	3	0	0	0	0	0	0	0	0	0	2	0	0	0	1	0	0	0	0	0	0	0	0	0	0	0	2	0	0	0	1	0	0	0	0	0	0	0	0
O75818	O75818	2	2	2	Ribonuclease P protein subunit p40	RPP40	sp|O75818|RPP40_HUMAN Ribonuclease P protein subunit p40 OS=Homo sapiens GN=RPP40 PE=1 SV=3	1	2	2	2	1	1	1	1	1	0	1	0	1	0	0	0	1	2	1	0	1	1	1	1	1	0	1	0	1	0	0	0	1	2	1	0	1	1	1	1	1	0
O75821	O75821	5	5	5	Eukaryotic translation initiation factor 3 subunit G	EIF3G	sp|O75821|EIF3G_HUMAN Eukaryotic translation initiation factor 3 subunit G OS=Homo sapiens GN=EIF3G PE=1 SV=2	1	5	5	5	3	3	2	2	2	2	2	2	2	2	2	2	1	1	0	1	3	3	2	2	2	2	2	2	2	2	2	2	1	1	0	1	3	3	2	2	2	2
O75822	O75822	4	4	4	Eukaryotic translation initiation factor 3 subunit J	EIF3J	sp|O75822|EIF3J_HUMAN Eukaryotic translation initiation factor 3 subunit J OS=Homo sapiens GN=EIF3J PE=1 SV=2	1	4	4	4	3	3	2	2	2	2	3	1	4	4	2	2	3	1	2	1	3	3	2	2	2	2	3	1	4	4	2	2	3	1	2	1	3	3	2	2	2	2
O75832	O75832	2	2	2	26S proteasome non-ATPase regulatory subunit 10	PSMD10	sp|O75832|PSD10_HUMAN 26S proteasome non-ATPase regulatory subunit 10 OS=Homo sapiens GN=PSMD10 PE=1 SV=1	1	2	2	2	2	2	1	1	1	1	2	1	2	2	1	1	1	0	1	0	2	2	1	1	1	1	2	1	2	2	1	1	1	0	1	0	2	2	1	1	1	1
O75843	O75843	2	2	2	AP-1 complex subunit gamma-like 2	AP1G2	sp|O75843|AP1G2_HUMAN AP-1 complex subunit gamma-like 2 OS=Homo sapiens GN=AP1G2 PE=1 SV=1	1	2	2	2	1	0	0	0	0	0	0	0	0	0	0	0	0	0	1	0	1	0	0	0	0	0	0	0	0	0	0	0	0	0	1	0	1	0	0	0	0	0
O75844	O75844	2	2	2	CAAX prenyl protease 1 homolog	ZMPSTE24	sp|O75844|FACE1_HUMAN CAAX prenyl protease 1 homolog OS=Homo sapiens GN=ZMPSTE24 PE=1 SV=2	1	2	2	2	1	1	1	1	1	1	1	1	1	1	0	1	1	2	2	1	1	1	1	1	1	1	1	1	1	1	0	1	1	2	2	1	1	1	1	1	1	1
O75874	O75874	2	2	2	Isocitrate dehydrogenase [NADP] cytoplasmic	IDH1	sp|O75874|IDHC_HUMAN Isocitrate dehydrogenase [NADP] cytoplasmic OS=Homo sapiens GN=IDH1 PE=1 SV=2	1	2	2	2	0	0	0	0	0	0	1	0	2	0	0	0	1	0	0	0	0	0	0	0	0	0	1	0	2	0	0	0	1	0	0	0	0	0	0	0	0	0
O75879	O75879	2	2	2	Glutamyl-tRNA(Gln) amidotransferase subunit B, mitochondrial	GATB	sp|O75879|GATB_HUMAN Glutamyl-tRNA(Gln) amidotransferase subunit B, mitochondrial OS=Homo sapiens GN=GATB PE=1 SV=1	1	2	2	2	0	0	0	1	0	0	1	1	1	1	0	0	0	0	0	0	0	0	0	1	0	0	1	1	1	1	0	0	0	0	0	0	0	0	0	1	0	0
O75880	O75880	4	4	4	Protein SCO1 homolog, mitochondrial	SCO1	sp|O75880|SCO1_HUMAN Protein SCO1 homolog, mitochondrial OS=Homo sapiens GN=SCO1 PE=1 SV=1	1	4	4	4	0	0	1	1	1	1	1	1	1	1	0	2	2	4	4	1	0	0	1	1	1	1	1	1	1	1	0	2	2	4	4	1	0	0	1	1	1	1
O75882	O75882	1	1	1	Attractin	ATRN	sp|O75882|ATRN_HUMAN Attractin OS=Homo sapiens GN=ATRN PE=1 SV=2	1	1	1	1	0	0	0	0	0	0	0	1	1	0	0	0	0	0	0	0	0	0	0	0	0	0	0	1	1	0	0	0	0	0	0	0	0	0	0	0	0	0
O75884	O75884	2	2	2	Putative hydrolase RBBP9	RBBP9	sp|O75884|RBBP9_HUMAN Putative hydrolase RBBP9 OS=Homo sapiens GN=RBBP9 PE=1 SV=2	1	2	2	2	1	1	1	1	0	0	1	1	1	1	1	0	1	0	0	0	1	1	1	1	0	0	1	1	1	1	1	0	1	0	0	0	1	1	1	1	0	0
O75886	O75886	2	2	2	Signal transducing adapter molecule 2	STAM2	sp|O75886|STAM2_HUMAN Signal transducing adapter molecule 2 OS=Homo sapiens GN=STAM2 PE=1 SV=1	1	2	2	2	1	1	1	2	0	0	1	0	2	2	0	0	2	0	0	0	1	1	1	2	0	0	1	0	2	2	0	0	2	0	0	0	1	1	1	2	0	0
O75907	O75907	1	1	1	Diacylglycerol O-acyltransferase 1	DGAT1	sp|O75907|DGAT1_HUMAN Diacylglycerol O-acyltransferase 1 OS=Homo sapiens GN=DGAT1 PE=1 SV=2	1	1	1	1	0	0	0	0	0	0	0	0	0	0	0	0	0	1	0	0	0	0	0	0	0	0	0	0	0	0	0	0	0	1	0	0	0	0	0	0	0	0
O75909	O75909	2	2	2	Cyclin-K	CCNK	sp|O75909|CCNK_HUMAN Cyclin-K OS=Homo sapiens GN=CCNK PE=1 SV=2	1	2	2	2	0	0	0	0	0	0	0	1	0	0	0	0	1	0	0	1	0	0	0	0	0	0	0	1	0	0	0	0	1	0	0	1	0	0	0	0	0	0
O75915	O75915	2	2	2	PRA1 family protein 3	ARL6IP5	sp|O75915|PRAF3_HUMAN PRA1 family protein 3 OS=Homo sapiens GN=ARL6IP5 PE=1 SV=1	1	2	2	2	0	1	1	1	1	0	1	1	0	1	0	0	1	0	1	1	0	1	1	1	1	0	1	1	0	1	0	0	1	0	1	1	0	1	1	1	1	0
O75928	O75928	1	1	1	E3 SUMO-protein ligase PIAS2	PIAS2	sp|O75928|PIAS2_HUMAN E3 SUMO-protein ligase PIAS2 OS=Homo sapiens GN=PIAS2 PE=1 SV=3	1	1	1	1	0	0	0	0	0	0	0	0	0	0	0	0	1	0	0	0	0	0	0	0	0	0	0	0	0	0	0	0	1	0	0	0	0	0	0	0	0	0
O75934	O75934	3	3	3	Pre-mRNA-splicing factor SPF27	BCAS2	sp|O75934|SPF27_HUMAN Pre-mRNA-splicing factor SPF27 OS=Homo sapiens GN=BCAS2 PE=1 SV=1	1	3	3	3	3	3	2	3	2	1	3	3	3	3	2	2	2	2	3	0	3	3	2	3	2	1	3	3	3	3	2	2	2	2	3	0	3	3	2	3	2	1
O75935	O75935	2	2	2	Dynactin subunit 3	DCTN3	sp|O75935|DCTN3_HUMAN Dynactin subunit 3 OS=Homo sapiens GN=DCTN3 PE=1 SV=1	1	2	2	2	1	1	1	1	0	0	2	2	1	1	0	0	1	0	0	1	1	1	1	1	0	0	2	2	1	1	0	0	1	0	0	1	1	1	1	1	0	0
O75937	O75937	3	3	3	DnaJ homolog subfamily C member 8	DNAJC8	sp|O75937|DNJC8_HUMAN DnaJ homolog subfamily C member 8 OS=Homo sapiens GN=DNAJC8 PE=1 SV=2	1	3	3	3	3	3	2	3	1	2	3	2	2	2	1	1	1	2	0	0	3	3	2	3	1	2	3	2	2	2	1	1	1	2	0	0	3	3	2	3	1	2
O75940	O75940	1	1	1	Survival of motor neuron-related-splicing factor 30	SMNDC1	sp|O75940|SPF30_HUMAN Survival of motor neuron-related-splicing factor 30 OS=Homo sapiens GN=SMNDC1 PE=1 SV=1	1	1	1	1	1	1	1	1	0	0	0	1	1	1	0	0	1	0	0	0	1	1	1	1	0	0	0	1	1	1	0	0	1	0	0	0	1	1	1	1	0	0
O75943	O75943	1	1	1	Cell cycle checkpoint protein RAD17	RAD17	sp|O75943|RAD17_HUMAN Cell cycle checkpoint protein RAD17 OS=Homo sapiens GN=RAD17 PE=1 SV=2	1	1	1	1	1	1	0	1	0	0	0	0	1	1	0	0	0	0	0	0	1	1	0	1	0	0	0	0	1	1	0	0	0	0	0	0	1	1	0	1	0	0
O75947	O75947	2	2	2	ATP synthase subunit d, mitochondrial	ATP5H	sp|O75947|ATP5H_HUMAN ATP synthase subunit d, mitochondrial OS=Homo sapiens GN=ATP5H PE=1 SV=3	1	2	2	2	1	1	2	2	1	2	1	2	2	2	1	2	1	2	1	2	1	1	2	2	1	2	1	2	2	2	1	2	1	2	1	2	1	1	2	2	1	2
O75955	O75955	3	3	3	Flotillin-1	FLOT1	sp|O75955|FLOT1_HUMAN Flotillin-1 OS=Homo sapiens GN=FLOT1 PE=1 SV=3	1	3	3	3	2	2	2	1	2	1	2	1	2	2	2	2	1	0	0	0	2	2	2	1	2	1	2	1	2	2	2	2	1	0	0	0	2	2	2	1	2	1
O75962	O75962	11	11	11	Triple functional domain protein	TRIO	sp|O75962|TRIO_HUMAN Triple functional domain protein OS=Homo sapiens GN=TRIO PE=1 SV=2	1	11	11	11	6	5	7	5	1	3	8	2	8	6	0	0	1	1	3	1	6	5	7	5	1	3	8	2	8	6	0	0	1	1	3	1	6	5	7	5	1	3
O75970	O75970	7	7	7	Multiple PDZ domain protein	MPDZ	sp|O75970|MPDZ_HUMAN Multiple PDZ domain protein OS=Homo sapiens GN=MPDZ PE=1 SV=2	1	7	7	7	0	2	0	1	1	1	2	1	4	2	0	1	0	2	0	0	0	2	0	1	1	1	2	1	4	2	0	1	0	2	0	0	0	2	0	1	1	1
O75976	O75976	7	7	7	Carboxypeptidase D	CPD	sp|O75976|CBPD_HUMAN Carboxypeptidase D OS=Homo sapiens GN=CPD PE=1 SV=2	1	7	7	7	2	2	6	4	2	1	4	3	3	5	1	1	4	2	2	1	2	2	6	4	2	1	4	3	3	5	1	1	4	2	2	1	2	2	6	4	2	1
O76003	O76003	3	3	2	Glutaredoxin-3	GLRX3	sp|O76003|GLRX3_HUMAN Glutaredoxin-3 OS=Homo sapiens GN=GLRX3 PE=1 SV=2	1	3	3	2	0	0	0	0	0	0	1	1	0	2	0	0	0	0	0	0	0	0	0	0	0	0	1	1	0	2	0	0	0	0	0	0	0	0	0	0	0	0
O76021	O76021	3	3	3	Ribosomal L1 domain-containing protein 1	RSL1D1	sp|O76021|RL1D1_HUMAN Ribosomal L1 domain-containing protein 1 OS=Homo sapiens GN=RSL1D1 PE=1 SV=3	1	3	3	3	1	1	1	1	1	1	1	2	2	1	1	1	1	2	1	2	1	1	1	1	1	1	1	2	2	1	1	1	1	2	1	2	1	1	1	1	1	1
O76024	O76024	5	5	5	Wolframin	WFS1	sp|O76024|WFS1_HUMAN Wolframin OS=Homo sapiens GN=WFS1 PE=1 SV=2	1	5	5	5	1	2	1	1	1	1	4	1	2	2	1	1	2	2	1	0	1	2	1	1	1	1	4	1	2	2	1	1	2	2	1	0	1	2	1	1	1	1
O76031	O76031	4	4	4	ATP-dependent Clp protease ATP-binding subunit clpX-like, mitochondrial	CLPX	sp|O76031|CLPX_HUMAN ATP-dependent Clp protease ATP-binding subunit clpX-like, mitochondrial OS=Homo sapiens GN=CLPX PE=1 SV=2	1	4	4	4	1	1	1	1	2	2	2	3	1	3	2	2	2	2	2	0	1	1	1	1	2	2	2	3	1	3	2	2	2	2	2	0	1	1	1	1	2	2
Q9UDX4;O76054	Q9UDX4;O76054	1;1	1;1	1;1	SEC14-like protein 3;SEC14-like protein 2	SEC14L3;SEC14L2	sp|Q9UDX4|S14L3_HUMAN SEC14-like protein 3 OS=Homo sapiens GN=SEC14L3 PE=1 SV=1;sp|O76054|S14L2_HUMAN SEC14-like protein 2 OS=Homo sapiens GN=SEC14L2 PE=1 SV=1	2	1	1	1	0	0	0	0	0	0	0	0	0	1	0	0	0	0	0	0	0	0	0	0	0	0	0	0	0	1	0	0	0	0	0	0	0	0	0	0	0	0
O76062	O76062	1	1	1	Delta(14)-sterol reductase	TM7SF2	sp|O76062|ERG24_HUMAN Delta(14)-sterol reductase OS=Homo sapiens GN=TM7SF2 PE=2 SV=3	1	1	1	1	0	0	0	0	0	0	0	0	1	0	0	0	0	0	0	0	0	0	0	0	0	0	0	0	1	0	0	0	0	0	0	0	0	0	0	0	0	0
O76071	O76071	5	5	5	Probable cytosolic iron-sulfur protein assembly protein CIAO1	CIAO1	sp|O76071|CIAO1_HUMAN Probable cytosolic iron-sulfur protein assembly protein CIAO1 OS=Homo sapiens GN=CIAO1 PE=1 SV=1	1	5	5	5	0	1	1	1	0	0	2	2	2	2	0	0	1	0	1	0	0	1	1	1	0	0	2	2	2	2	0	0	1	0	1	0	0	1	1	1	0	0
O76081	O76081	1	1	1	Regulator of G-protein signaling 20	RGS20	sp|O76081|RGS20_HUMAN Regulator of G-protein signaling 20 OS=Homo sapiens GN=RGS20 PE=1 SV=4	1	1	1	1	1	1	0	1	0	0	1	0	0	1	1	1	0	0	0	0	1	1	0	1	0	0	1	0	0	1	1	1	0	0	0	0	1	1	0	1	0	0
O76094	O76094	5	5	5	Signal recognition particle subunit SRP72	SRP72	sp|O76094|SRP72_HUMAN Signal recognition particle subunit SRP72 OS=Homo sapiens GN=SRP72 PE=1 SV=3	1	5	5	5	1	1	0	1	0	0	2	4	1	1	0	0	1	4	1	0	1	1	0	1	0	0	2	4	1	1	0	0	1	4	1	0	1	1	0	1	0	0
O94760	O94760	3	3	3	N(G),N(G)-dimethylarginine dimethylaminohydrolase 1	DDAH1	sp|O94760|DDAH1_HUMAN N(G),N(G)-dimethylarginine dimethylaminohydrolase 1 OS=Homo sapiens GN=DDAH1 PE=1 SV=3	1	3	3	3	1	2	1	2	1	1	2	1	1	2	0	0	1	0	1	0	1	2	1	2	1	1	2	1	1	2	0	0	1	0	1	0	1	2	1	2	1	1
O94762	O94762	2	2	2	ATP-dependent DNA helicase Q5	RECQL5	sp|O94762|RECQ5_HUMAN ATP-dependent DNA helicase Q5 OS=Homo sapiens GN=RECQL5 PE=1 SV=2	1	2	2	2	0	0	0	0	0	0	0	0	2	0	0	0	0	0	0	0	0	0	0	0	0	0	0	0	2	0	0	0	0	0	0	0	0	0	0	0	0	0
O94766	O94766	2	2	2	Galactosylgalactosylxylosylprotein 3-beta-glucuronosyltransferase 3	B3GAT3	sp|O94766|B3GA3_HUMAN Galactosylgalactosylxylosylprotein 3-beta-glucuronosyltransferase 3 OS=Homo sapiens GN=B3GAT3 PE=1 SV=2	1	2	2	2	1	2	1	1	1	2	2	2	2	2	1	0	2	1	1	0	1	2	1	1	1	2	2	2	2	2	1	0	2	1	1	0	1	2	1	1	1	2
O94776	O94776	5	5	5	Metastasis-associated protein MTA2	MTA2	sp|O94776|MTA2_HUMAN Metastasis-associated protein MTA2 OS=Homo sapiens GN=MTA2 PE=1 SV=1	1	5	5	5	4	2	4	2	2	2	5	5	3	4	2	2	3	1	2	1	4	2	4	2	2	2	5	5	3	4	2	2	3	1	2	1	4	2	4	2	2	2
O94782	O94782	1	1	1	Ubiquitin carboxyl-terminal hydrolase 1	USP1	sp|O94782|UBP1_HUMAN Ubiquitin carboxyl-terminal hydrolase 1 OS=Homo sapiens GN=USP1 PE=1 SV=1	1	1	1	1	0	0	0	0	0	0	0	0	1	0	0	0	0	0	0	0	0	0	0	0	0	0	0	0	1	0	0	0	0	0	0	0	0	0	0	0	0	0
O94804	O94804	4	4	4	Serine/threonine-protein kinase 10	STK10	sp|O94804|STK10_HUMAN Serine/threonine-protein kinase 10 OS=Homo sapiens GN=STK10 PE=1 SV=1	1	4	4	4	2	2	2	2	1	1	2	1	2	1	2	2	2	1	1	1	2	2	2	2	1	1	2	1	2	1	2	2	2	1	1	1	2	2	2	2	1	1
O94813	O94813	1	1	1	Slit homolog 2 protein;Slit homolog 2 protein N-product;Slit homolog 2 protein C-product	SLIT2	sp|O94813|SLIT2_HUMAN Slit homolog 2 protein OS=Homo sapiens GN=SLIT2 PE=1 SV=1	1	1	1	1	0	0	0	0	0	0	0	0	1	0	0	0	0	0	0	0	0	0	0	0	0	0	0	0	1	0	0	0	0	0	0	0	0	0	0	0	0	0
O94822	O94822	9	9	9	E3 ubiquitin-protein ligase listerin	LTN1	sp|O94822|LTN1_HUMAN E3 ubiquitin-protein ligase listerin OS=Homo sapiens GN=LTN1 PE=1 SV=6	1	9	9	9	4	5	3	2	0	1	3	3	2	3	1	1	1	1	0	0	4	5	3	2	0	1	3	3	2	3	1	1	1	1	0	0	4	5	3	2	0	1
O94826	O94826	8	8	8	Mitochondrial import receptor subunit TOM70	TOMM70A	sp|O94826|TOM70_HUMAN Mitochondrial import receptor subunit TOM70 OS=Homo sapiens GN=TOMM70A PE=1 SV=1	1	8	8	8	3	5	5	4	3	3	7	5	5	6	3	4	4	4	6	2	3	5	5	4	3	3	7	5	5	6	3	4	4	4	6	2	3	5	5	4	3	3
O94829	O94829	3	3	3	Importin-13	IPO13	sp|O94829|IPO13_HUMAN Importin-13 OS=Homo sapiens GN=IPO13 PE=1 SV=3	1	3	3	3	0	1	0	0	0	0	0	0	2	0	0	0	0	0	0	0	0	1	0	0	0	0	0	0	2	0	0	0	0	0	0	0	0	1	0	0	0	0
O94842	O94842	1	1	1	TOX high mobility group box family member 4	TOX4	sp|O94842|TOX4_HUMAN TOX high mobility group box family member 4 OS=Homo sapiens GN=TOX4 PE=1 SV=1	1	1	1	1	0	0	0	0	0	0	0	0	0	0	0	0	1	0	0	0	0	0	0	0	0	0	0	0	0	0	0	0	1	0	0	0	0	0	0	0	0	0
O94851	O94851	3	3	3	Protein-methionine sulfoxide oxidase MICAL2	MICAL2	sp|O94851|MICA2_HUMAN Protein-methionine sulfoxide oxidase MICAL2 OS=Homo sapiens GN=MICAL2 PE=1 SV=1	1	3	3	3	0	0	1	2	0	0	2	2	2	1	0	0	1	1	1	0	0	0	1	2	0	0	2	2	2	1	0	0	1	1	1	0	0	0	1	2	0	0
O94854	O94854	3	3	3	Uncharacterized protein KIAA0754	KIAA0754	sp|O94854|K0754_HUMAN Uncharacterized protein KIAA0754 OS=Homo sapiens GN=KIAA0754 PE=2 SV=4	1	3	3	3	1	0	3	2	0	1	1	0	1	2	1	0	2	1	1	0	1	0	3	2	0	1	1	0	1	2	1	0	2	1	1	0	1	0	3	2	0	1
O94855	O94855	2	2	2	Protein transport protein Sec24D	SEC24D	sp|O94855|SC24D_HUMAN Protein transport protein Sec24D OS=Homo sapiens GN=SEC24D PE=1 SV=2	1	2	2	2	0	0	0	1	0	0	1	2	1	0	0	0	0	0	0	0	0	0	0	1	0	0	1	2	1	0	0	0	0	0	0	0	0	0	0	1	0	0
O94864	O94864	1	1	1	STAGA complex 65 subunit gamma	SUPT7L	sp|O94864|ST65G_HUMAN STAGA complex 65 subunit gamma OS=Homo sapiens GN=SUPT7L PE=1 SV=1	1	1	1	1	0	0	1	1	0	0	0	0	1	1	0	0	0	0	0	0	0	0	1	1	0	0	0	0	1	1	0	0	0	0	0	0	0	0	1	1	0	0
O94874	O94874	5	5	5	E3 UFM1-protein ligase 1	UFL1	sp|O94874|UFL1_HUMAN E3 UFM1-protein ligase 1 OS=Homo sapiens GN=UFL1 PE=1 SV=2	1	5	5	5	1	1	1	1	2	2	1	2	1	1	2	1	3	3	2	0	1	1	1	1	2	2	1	2	1	1	2	1	3	3	2	0	1	1	1	1	2	2
O94880	O94880	3	3	3	PHD finger protein 14	PHF14	sp|O94880|PHF14_HUMAN PHD finger protein 14 OS=Homo sapiens GN=PHF14 PE=1 SV=2	1	3	3	3	2	2	1	1	0	1	1	0	0	1	1	3	0	0	0	0	2	2	1	1	0	1	1	0	0	1	1	3	0	0	0	0	2	2	1	1	0	1
O94886	O94886	1	1	1	CSC1-like protein 1	TMEM63A	sp|O94886|CSCL1_HUMAN CSC1-like protein 1 OS=Homo sapiens GN=TMEM63A PE=1 SV=3	1	1	1	1	0	0	0	0	0	0	0	0	0	0	0	0	0	0	1	0	0	0	0	0	0	0	0	0	0	0	0	0	0	0	1	0	0	0	0	0	0	0
O94888	O94888	1	1	1	UBX domain-containing protein 7	UBXN7	sp|O94888|UBXN7_HUMAN UBX domain-containing protein 7 OS=Homo sapiens GN=UBXN7 PE=1 SV=2	1	1	1	1	0	0	0	1	0	0	0	0	1	1	0	0	0	0	1	0	0	0	0	1	0	0	0	0	1	1	0	0	0	0	1	0	0	0	0	1	0	0
O94901	O94901	8	8	8	SUN domain-containing protein 1	SUN1	sp|O94901|SUN1_HUMAN SUN domain-containing protein 1 OS=Homo sapiens GN=SUN1 PE=1 SV=3	1	8	8	8	2	4	2	3	2	2	4	6	4	3	0	3	6	5	2	0	2	4	2	3	2	2	4	6	4	3	0	3	6	5	2	0	2	4	2	3	2	2
O94905	O94905	2	2	2	Erlin-2	ERLIN2	sp|O94905|ERLN2_HUMAN Erlin-2 OS=Homo sapiens GN=ERLIN2 PE=1 SV=1	1	2	2	2	1	1	0	1	0	0	1	1	1	1	0	0	1	1	1	1	1	1	0	1	0	0	1	1	1	1	0	0	1	1	1	1	1	1	0	1	0	0
O94906	O94906	6	6	6	Pre-mRNA-processing factor 6	PRPF6	sp|O94906|PRP6_HUMAN Pre-mRNA-processing factor 6 OS=Homo sapiens GN=PRPF6 PE=1 SV=1	1	6	6	6	2	3	0	1	0	0	1	3	2	3	1	1	2	1	0	1	2	3	0	1	0	0	1	3	2	3	1	1	2	1	0	1	2	3	0	1	0	0
O94907	O94907	2	2	2	Dickkopf-related protein 1	DKK1	sp|O94907|DKK1_HUMAN Dickkopf-related protein 1 OS=Homo sapiens GN=DKK1 PE=1 SV=1	1	2	2	2	2	2	2	2	2	2	2	1	2	1	2	2	2	0	2	0	2	2	2	2	2	2	2	1	2	1	2	2	2	0	2	0	2	2	2	2	2	2
O94913	O94913	1	1	1	Pre-mRNA cleavage complex 2 protein Pcf11	PCF11	sp|O94913|PCF11_HUMAN Pre-mRNA cleavage complex 2 protein Pcf11 OS=Homo sapiens GN=PCF11 PE=1 SV=3	1	1	1	1	0	0	0	1	0	0	0	0	1	0	0	0	0	0	0	0	0	0	0	1	0	0	0	0	1	0	0	0	0	0	0	0	0	0	0	1	0	0
O94915	O94915	18	18	18	Protein furry homolog-like	FRYL	sp|O94915|FRYL_HUMAN Protein furry homolog-like OS=Homo sapiens GN=FRYL PE=1 SV=2	1	18	18	18	10	6	3	1	2	1	5	6	4	5	1	2	4	3	7	1	10	6	3	1	2	1	5	6	4	5	1	2	4	3	7	1	10	6	3	1	2	1
O94916	O94916	2	2	1	Nuclear factor of activated T-cells 5	NFAT5	sp|O94916|NFAT5_HUMAN Nuclear factor of activated T-cells 5 OS=Homo sapiens GN=NFAT5 PE=1 SV=1	1	2	2	1	0	0	0	0	0	0	1	0	1	0	0	0	0	0	0	0	0	0	0	0	0	0	1	0	1	0	0	0	0	0	0	0	0	0	0	0	0	0
O94919	O94919	4	4	4	Endonuclease domain-containing 1 protein	ENDOD1	sp|O94919|ENDD1_HUMAN Endonuclease domain-containing 1 protein OS=Homo sapiens GN=ENDOD1 PE=1 SV=2	1	4	4	4	2	3	3	3	1	1	3	3	3	1	1	2	2	1	1	0	2	3	3	3	1	1	3	3	3	1	1	2	2	1	1	0	2	3	3	3	1	1
O94923	O94923	2	2	2	D-glucuronyl C5-epimerase	GLCE	sp|O94923|GLCE_HUMAN D-glucuronyl C5-epimerase OS=Homo sapiens GN=GLCE PE=1 SV=3	1	2	2	2	1	1	1	1	1	0	1	1	0	0	0	1	1	1	1	0	1	1	1	1	1	0	1	1	0	0	0	1	1	1	1	0	1	1	1	1	1	0
O94925	O94925	6	6	6	Glutaminase kidney isoform, mitochondrial	GLS	sp|O94925|GLSK_HUMAN Glutaminase kidney isoform, mitochondrial OS=Homo sapiens GN=GLS PE=1 SV=1	1	6	6	6	2	2	2	2	2	4	2	5	4	4	2	4	3	6	2	2	2	2	2	2	2	4	2	5	4	4	2	4	3	6	2	2	2	2	2	2	2	4
O94927	O94927	1	1	1	HAUS augmin-like complex subunit 5	HAUS5	sp|O94927|HAUS5_HUMAN HAUS augmin-like complex subunit 5 OS=Homo sapiens GN=HAUS5 PE=1 SV=2	1	1	1	1	0	0	1	1	1	1	1	0	0	1	1	1	1	0	1	0	0	0	1	1	1	1	1	0	0	1	1	1	1	0	1	0	0	0	1	1	1	1
O94929	O94929	1	1	1	Actin-binding LIM protein 3	ABLIM3	sp|O94929|ABLM3_HUMAN Actin-binding LIM protein 3 OS=Homo sapiens GN=ABLIM3 PE=1 SV=3	1	1	1	1	0	0	0	0	0	0	1	0	0	1	0	0	0	0	1	0	0	0	0	0	0	0	1	0	0	1	0	0	0	0	1	0	0	0	0	0	0	0
O94952	O94952	2	2	2	F-box only protein 21	FBXO21	sp|O94952|FBX21_HUMAN F-box only protein 21 OS=Homo sapiens GN=FBXO21 PE=2 SV=2	1	2	2	2	1	1	1	1	0	0	2	0	0	2	0	0	0	0	1	0	1	1	1	1	0	0	2	0	0	2	0	0	0	0	1	0	1	1	1	1	0	0
O94955	O94955	2	2	2	Rho-related BTB domain-containing protein 3	RHOBTB3	sp|O94955|RHBT3_HUMAN Rho-related BTB domain-containing protein 3 OS=Homo sapiens GN=RHOBTB3 PE=1 SV=2	1	2	2	2	0	1	1	0	0	0	0	0	1	2	1	0	0	0	0	0	0	1	1	0	0	0	0	0	1	2	1	0	0	0	0	0	0	1	1	0	0	0
O94964	O94964	3	3	3	Protein SOGA1;N-terminal form;C-terminal 80 kDa form	SOGA1	sp|O94964|SOGA1_HUMAN Protein SOGA1 OS=Homo sapiens GN=SOGA1 PE=1 SV=2	1	3	3	3	1	0	1	1	0	0	0	0	2	1	0	0	1	0	1	0	1	0	1	1	0	0	0	0	2	1	0	0	1	0	1	0	1	0	1	1	0	0
O94966	O94966	10	10	10	Ubiquitin carboxyl-terminal hydrolase 19	USP19	sp|O94966|UBP19_HUMAN Ubiquitin carboxyl-terminal hydrolase 19 OS=Homo sapiens GN=USP19 PE=1 SV=2	1	10	10	10	6	2	5	4	0	2	7	3	6	6	1	1	4	1	3	0	6	2	5	4	0	2	7	3	6	6	1	1	4	1	3	0	6	2	5	4	0	2
O94967	O94967	1	1	1	WD repeat-containing protein 47	WDR47	sp|O94967|WDR47_HUMAN WD repeat-containing protein 47 OS=Homo sapiens GN=WDR47 PE=1 SV=1	1	1	1	1	1	0	0	1	0	0	1	0	0	0	0	0	0	0	0	0	1	0	0	1	0	0	1	0	0	0	0	0	0	0	0	0	1	0	0	1	0	0
O94973	O94973	8	8	8	AP-2 complex subunit alpha-2	AP2A2	sp|O94973|AP2A2_HUMAN AP-2 complex subunit alpha-2 OS=Homo sapiens GN=AP2A2 PE=1 SV=2	1	8	8	8	4	3	4	3	1	2	3	5	4	5	2	2	3	4	1	0	4	3	4	3	1	2	3	5	4	5	2	2	3	4	1	0	4	3	4	3	1	2
O94979	O94979	11	11	11	Protein transport protein Sec31A	SEC31A	sp|O94979|SC31A_HUMAN Protein transport protein Sec31A OS=Homo sapiens GN=SEC31A PE=1 SV=3	1	11	11	11	4	3	4	4	0	1	7	7	3	4	1	1	3	3	4	2	4	3	4	4	0	1	7	7	3	4	1	1	3	3	4	2	4	3	4	4	0	1
O94985	O94985	2	2	2	Calsyntenin-1;Soluble Alc-alpha;CTF1-alpha	CLSTN1	sp|O94985|CSTN1_HUMAN Calsyntenin-1 OS=Homo sapiens GN=CLSTN1 PE=1 SV=1	1	2	2	2	1	0	0	0	0	0	2	0	0	0	0	0	0	0	0	0	1	0	0	0	0	0	2	0	0	0	0	0	0	0	0	0	1	0	0	0	0	0
O94986	O94986	2	2	2	Centrosomal protein of 152 kDa	CEP152	sp|O94986|CE152_HUMAN Centrosomal protein of 152 kDa OS=Homo sapiens GN=CEP152 PE=1 SV=4	1	2	2	2	0	0	1	1	0	0	1	0	1	1	0	0	1	0	0	0	0	0	1	1	0	0	1	0	1	1	0	0	1	0	0	0	0	0	1	1	0	0
O94991	O94991	2	2	2	SLIT and NTRK-like protein 5	SLITRK5	sp|O94991|SLIK5_HUMAN SLIT and NTRK-like protein 5 OS=Homo sapiens GN=SLITRK5 PE=2 SV=2	1	2	2	2	0	0	0	1	0	1	1	0	0	0	0	0	1	0	0	0	0	0	0	1	0	1	1	0	0	0	0	0	1	0	0	0	0	0	0	1	0	1
O94992	O94992	5	5	4	Protein HEXIM1	HEXIM1	sp|O94992|HEXI1_HUMAN Protein HEXIM1 OS=Homo sapiens GN=HEXIM1 PE=1 SV=1	1	5	5	4	1	1	1	1	0	0	2	1	3	1	1	1	1	1	2	0	1	1	1	1	0	0	2	1	3	1	1	1	1	1	2	0	1	1	1	1	0	0
O95059	O95059	1	1	1	Ribonuclease P protein subunit p14	RPP14	sp|O95059|RPP14_HUMAN Ribonuclease P protein subunit p14 OS=Homo sapiens GN=RPP14 PE=1 SV=3	1	1	1	1	1	1	1	1	0	1	1	1	1	1	1	1	1	1	1	1	1	1	1	1	0	1	1	1	1	1	1	1	1	1	1	1	1	1	1	1	0	1
O95067	O95067	1	1	1	G2/mitotic-specific cyclin-B2	CCNB2	sp|O95067|CCNB2_HUMAN G2/mitotic-specific cyclin-B2 OS=Homo sapiens GN=CCNB2 PE=1 SV=1	1	1	1	1	0	1	1	0	0	0	1	0	0	1	0	0	0	0	0	0	0	1	1	0	0	0	1	0	0	1	0	0	0	0	0	0	0	1	1	0	0	0
O95070	O95070	1	1	1	Protein YIF1A	YIF1A	sp|O95070|YIF1A_HUMAN Protein YIF1A OS=Homo sapiens GN=YIF1A PE=1 SV=2	1	1	1	1	1	0	0	1	0	0	0	1	1	1	0	0	1	1	0	0	1	0	0	1	0	0	0	1	1	1	0	0	1	1	0	0	1	0	0	1	0	0
O95071	O95071	8	8	8	E3 ubiquitin-protein ligase UBR5	UBR5	sp|O95071|UBR5_HUMAN E3 ubiquitin-protein ligase UBR5 OS=Homo sapiens GN=UBR5 PE=1 SV=2	1	8	8	8	1	1	1	2	0	0	3	0	7	4	0	0	1	0	0	0	1	1	1	2	0	0	3	0	7	4	0	0	1	0	0	0	1	1	1	2	0	0
O95081	O95081	1	1	1	Arf-GAP domain and FG repeat-containing protein 2	AGFG2	sp|O95081|AGFG2_HUMAN Arf-GAP domain and FG repeat-containing protein 2 OS=Homo sapiens GN=AGFG2 PE=1 SV=2	1	1	1	1	0	0	0	0	0	0	1	1	0	0	0	0	0	0	0	0	0	0	0	0	0	0	1	1	0	0	0	0	0	0	0	0	0	0	0	0	0	0
O95084	O95084	2	2	2	Serine protease 23	PRSS23	sp|O95084|PRS23_HUMAN Serine protease 23 OS=Homo sapiens GN=PRSS23 PE=1 SV=1	1	2	2	2	0	0	0	0	0	0	2	0	0	0	1	1	0	0	0	0	0	0	0	0	0	0	2	0	0	0	1	1	0	0	0	0	0	0	0	0	0	0
O95104	O95104	6	6	6	Splicing factor, arginine/serine-rich 15	SCAF4	sp|O95104|SFR15_HUMAN Splicing factor, arginine/serine-rich 15 OS=Homo sapiens GN=SCAF4 PE=1 SV=3	1	6	6	6	3	3	3	2	2	1	1	4	3	3	0	0	4	2	1	1	3	3	3	2	2	1	1	4	3	3	0	0	4	2	1	1	3	3	3	2	2	1
O95139	O95139	1	1	1	NADH dehydrogenase [ubiquinone] 1 beta subcomplex subunit 6	NDUFB6	sp|O95139|NDUB6_HUMAN NADH dehydrogenase [ubiquinone] 1 beta subcomplex subunit 6 OS=Homo sapiens GN=NDUFB6 PE=1 SV=3	1	1	1	1	0	0	0	0	0	0	0	1	0	0	0	0	0	1	0	0	0	0	0	0	0	0	0	1	0	0	0	0	0	1	0	0	0	0	0	0	0	0
O95140	O95140	6	6	6	Mitofusin-2	MFN2	sp|O95140|MFN2_HUMAN Mitofusin-2 OS=Homo sapiens GN=MFN2 PE=1 SV=3	1	6	6	6	2	2	3	4	3	3	2	4	3	3	0	2	4	3	0	0	2	2	3	4	3	3	2	4	3	3	0	2	4	3	0	0	2	2	3	4	3	3
O95155	O95155	5	5	5	Ubiquitin conjugation factor E4 B	UBE4B	sp|O95155|UBE4B_HUMAN Ubiquitin conjugation factor E4 B OS=Homo sapiens GN=UBE4B PE=1 SV=1	1	5	5	5	2	2	1	1	0	0	2	1	2	2	0	1	3	1	2	0	2	2	1	1	0	0	2	1	2	2	0	1	3	1	2	0	2	2	1	1	0	0
O95159	O95159	3	3	3	Zinc finger protein-like 1	ZFPL1	sp|O95159|ZFPL1_HUMAN Zinc finger protein-like 1 OS=Homo sapiens GN=ZFPL1 PE=1 SV=2	1	3	3	3	1	1	2	1	0	1	2	2	0	0	0	0	0	1	0	0	1	1	2	1	0	1	2	2	0	0	0	0	0	1	0	0	1	1	2	1	0	1
O95163	O95163	10	10	10	Elongator complex protein 1	IKBKAP	sp|O95163|ELP1_HUMAN Elongator complex protein 1 OS=Homo sapiens GN=IKBKAP PE=1 SV=3	1	10	10	10	6	3	4	3	3	3	5	4	4	2	0	2	4	3	2	1	6	3	4	3	3	3	5	4	4	2	0	2	4	3	2	1	6	3	4	3	3	3
O95164	O95164	1	1	1	Ubiquitin-like protein 3	UBL3	sp|O95164|UBL3_HUMAN Ubiquitin-like protein 3 OS=Homo sapiens GN=UBL3 PE=1 SV=1	1	1	1	1	1	0	0	1	0	0	0	1	1	0	1	0	0	0	0	0	1	0	0	1	0	0	0	1	1	0	1	0	0	0	0	0	1	0	0	1	0	0
O95167	O95167	2	2	2	NADH dehydrogenase [ubiquinone] 1 alpha subcomplex subunit 3	NDUFA3	sp|O95167|NDUA3_HUMAN NADH dehydrogenase [ubiquinone] 1 alpha subcomplex subunit 3 OS=Homo sapiens GN=NDUFA3 PE=1 SV=1	1	2	2	2	2	1	2	2	1	1	2	1	1	2	1	1	2	1	1	0	2	1	2	2	1	1	2	1	1	2	1	1	2	1	1	0	2	1	2	2	1	1
O95168	O95168	1	1	1	NADH dehydrogenase [ubiquinone] 1 beta subcomplex subunit 4	NDUFB4	sp|O95168|NDUB4_HUMAN NADH dehydrogenase [ubiquinone] 1 beta subcomplex subunit 4 OS=Homo sapiens GN=NDUFB4 PE=1 SV=3	1	1	1	1	1	0	0	1	0	0	0	0	0	0	1	1	1	0	0	0	1	0	0	1	0	0	0	0	0	0	1	1	1	0	0	0	1	0	0	1	0	0
O95169	O95169	1	1	1	NADH dehydrogenase [ubiquinone] 1 beta subcomplex subunit 8, mitochondrial	NDUFB8	sp|O95169|NDUB8_HUMAN NADH dehydrogenase [ubiquinone] 1 beta subcomplex subunit 8, mitochondrial OS=Homo sapiens GN=NDUFB8 PE=1 SV=1	1	1	1	1	1	1	1	1	1	1	1	1	1	1	1	1	1	1	1	0	1	1	1	1	1	1	1	1	1	1	1	1	1	1	1	0	1	1	1	1	1	1
O95178	O95178	1	1	1	NADH dehydrogenase [ubiquinone] 1 beta subcomplex subunit 2, mitochondrial	NDUFB2	sp|O95178|NDUB2_HUMAN NADH dehydrogenase [ubiquinone] 1 beta subcomplex subunit 2, mitochondrial OS=Homo sapiens GN=NDUFB2 PE=1 SV=1	1	1	1	1	0	0	0	0	1	1	0	0	0	1	1	1	1	1	1	0	0	0	0	0	1	1	0	0	0	1	1	1	1	1	1	0	0	0	0	0	1	1
O95197	O95197	2	2	2	Reticulon-3	RTN3	sp|O95197|RTN3_HUMAN Reticulon-3 OS=Homo sapiens GN=RTN3 PE=1 SV=2	1	2	2	2	1	1	1	2	1	1	1	1	1	1	1	1	1	1	1	0	1	1	1	2	1	1	1	1	1	1	1	1	1	1	1	0	1	1	1	2	1	1
O95202	O95202	9	9	9	LETM1 and EF-hand domain-containing protein 1, mitochondrial	LETM1	sp|O95202|LETM1_HUMAN LETM1 and EF-hand domain-containing protein 1, mitochondrial OS=Homo sapiens GN=LETM1 PE=1 SV=1	1	9	9	9	2	3	4	3	3	3	3	4	2	3	1	1	4	4	2	0	2	3	4	3	3	3	3	4	2	3	1	1	4	4	2	0	2	3	4	3	3	3
O95210	O95210	1	1	1	Starch-binding domain-containing protein 1	STBD1	sp|O95210|STBD1_HUMAN Starch-binding domain-containing protein 1 OS=Homo sapiens GN=STBD1 PE=1 SV=1	1	1	1	1	1	1	1	1	1	1	1	0	1	1	0	1	1	0	1	0	1	1	1	1	1	1	1	0	1	1	0	1	1	0	1	0	1	1	1	1	1	1
O95229	O95229	2	2	2	ZW10 interactor	ZWINT	sp|O95229|ZWINT_HUMAN ZW10 interactor OS=Homo sapiens GN=ZWINT PE=1 SV=2	1	2	2	2	0	0	0	0	0	0	1	0	2	0	0	0	0	0	0	0	0	0	0	0	0	0	1	0	2	0	0	0	0	0	0	0	0	0	0	0	0	0
O95232	O95232	1	1	1	Luc7-like protein 3	LUC7L3	sp|O95232|LC7L3_HUMAN Luc7-like protein 3 OS=Homo sapiens GN=LUC7L3 PE=1 SV=2	1	1	1	1	0	0	0	0	0	0	0	0	1	0	0	0	0	0	0	0	0	0	0	0	0	0	0	0	1	0	0	0	0	0	0	0	0	0	0	0	0	0
O95235	O95235	5	5	5	Kinesin-like protein KIF20A	KIF20A	sp|O95235|KI20A_HUMAN Kinesin-like protein KIF20A OS=Homo sapiens GN=KIF20A PE=1 SV=1	1	5	5	5	2	3	2	2	1	1	3	3	2	3	0	1	1	1	2	0	2	3	2	2	1	1	3	3	2	3	0	1	1	1	2	0	2	3	2	2	1	1
O95239;Q2VIQ3	O95239	9;3	9;3	9;3	Chromosome-associated kinesin KIF4A	KIF4A	sp|O95239|KIF4A_HUMAN Chromosome-associated kinesin KIF4A OS=Homo sapiens GN=KIF4A PE=1 SV=3	2	9	9	9	3	5	5	4	2	2	5	2	7	1	3	3	5	3	4	0	3	5	5	4	2	2	5	2	7	1	3	3	5	3	4	0	3	5	5	4	2	2
O95248	O95248	1	1	1	Myotubularin-related protein 5	SBF1	sp|O95248|MTMR5_HUMAN Myotubularin-related protein 5 OS=Homo sapiens GN=SBF1 PE=1 SV=3	1	1	1	1	1	0	0	0	0	0	0	0	0	0	0	0	0	0	0	0	1	0	0	0	0	0	0	0	0	0	0	0	0	0	0	0	1	0	0	0	0	0
O95251	O95251	3	3	3	Histone acetyltransferase KAT7	KAT7	sp|O95251|KAT7_HUMAN Histone acetyltransferase KAT7 OS=Homo sapiens GN=KAT7 PE=1 SV=1	1	3	3	3	1	0	0	1	0	2	1	2	1	0	0	0	0	2	0	0	1	0	0	1	0	2	1	2	1	0	0	0	0	2	0	0	1	0	0	1	0	2
O95260	O95260	1	1	1	Arginyl-tRNA--protein transferase 1	ATE1	sp|O95260|ATE1_HUMAN Arginyl-tRNA--protein transferase 1 OS=Homo sapiens GN=ATE1 PE=1 SV=2	1	1	1	1	1	0	0	0	0	0	0	0	0	0	0	0	0	0	0	0	1	0	0	0	0	0	0	0	0	0	0	0	0	0	0	0	1	0	0	0	0	0
O95292	O95292	1	1	1	Vesicle-associated membrane protein-associated protein B/C	VAPB	sp|O95292|VAPB_HUMAN Vesicle-associated membrane protein-associated protein B/C OS=Homo sapiens GN=VAPB PE=1 SV=3	1	1	1	1	1	1	1	0	1	1	1	1	0	1	0	0	1	0	0	1	1	1	1	0	1	1	1	1	0	1	0	0	1	0	0	1	1	1	1	0	1	1
O95299	O95299	4	4	4	NADH dehydrogenase [ubiquinone] 1 alpha subcomplex subunit 10, mitochondrial	NDUFA10	sp|O95299|NDUAA_HUMAN NADH dehydrogenase [ubiquinone] 1 alpha subcomplex subunit 10, mitochondrial OS=Homo sapiens GN=NDUFA10 PE=1 SV=1	1	4	4	4	1	0	1	1	0	1	0	3	1	0	1	1	3	2	2	1	1	0	1	1	0	1	0	3	1	0	1	1	3	2	2	1	1	0	1	1	0	1
O95302;Q75LS8	O95302	3;1	3;1	3;1	Peptidyl-prolyl cis-trans isomerase FKBP9	FKBP9	sp|O95302|FKBP9_HUMAN Peptidyl-prolyl cis-trans isomerase FKBP9 OS=Homo sapiens GN=FKBP9 PE=1 SV=2	2	3	3	3	1	1	1	2	0	0	1	2	1	1	0	1	2	2	0	0	1	1	1	2	0	0	1	2	1	1	0	1	2	2	0	0	1	1	1	2	0	0
O95336	O95336	3	3	3	6-phosphogluconolactonase	PGLS	sp|O95336|6PGL_HUMAN 6-phosphogluconolactonase OS=Homo sapiens GN=PGLS PE=1 SV=2	1	3	3	3	1	1	0	1	1	1	2	2	1	2	1	1	3	2	1	0	1	1	0	1	1	1	2	2	1	2	1	1	3	2	1	0	1	1	0	1	1	1
O95340	O95340	2	2	2	Bifunctional 3-phosphoadenosine 5-phosphosulfate synthase 2;Sulfate adenylyltransferase;Adenylyl-sulfate kinase	PAPSS2	sp|O95340|PAPS2_HUMAN Bifunctional 3-phosphoadenosine 5-phosphosulfate synthase 2 OS=Homo sapiens GN=PAPSS2 PE=1 SV=2	1	2	2	2	2	1	1	2	0	1	1	2	2	2	1	1	1	1	2	0	2	1	1	2	0	1	1	2	2	2	1	1	1	1	2	0	2	1	1	2	0	1
O95342	O95342	1	1	1	Bile salt export pump	ABCB11	sp|O95342|ABCBB_HUMAN Bile salt export pump OS=Homo sapiens GN=ABCB11 PE=1 SV=2	1	1	1	1	0	0	0	0	0	1	0	0	1	1	0	0	0	0	0	0	0	0	0	0	0	1	0	0	1	1	0	0	0	0	0	0	0	0	0	0	0	1
O95347	O95347	7	7	7	Structural maintenance of chromosomes protein 2	SMC2	sp|O95347|SMC2_HUMAN Structural maintenance of chromosomes protein 2 OS=Homo sapiens GN=SMC2 PE=1 SV=2	1	7	7	7	3	4	3	2	0	0	4	7	4	4	1	0	3	5	2	2	3	4	3	2	0	0	4	7	4	4	1	0	3	5	2	2	3	4	3	2	0	0
O95352	O95352	3	3	3	Ubiquitin-like modifier-activating enzyme ATG7	ATG7	sp|O95352|ATG7_HUMAN Ubiquitin-like modifier-activating enzyme ATG7 OS=Homo sapiens GN=ATG7 PE=1 SV=1	1	3	3	3	0	0	1	0	0	0	1	2	2	1	0	0	0	0	0	0	0	0	1	0	0	0	1	2	2	1	0	0	0	0	0	0	0	0	1	0	0	0
O95361	O95361	2	2	2	Tripartite motif-containing protein 16	TRIM16	sp|O95361|TRI16_HUMAN Tripartite motif-containing protein 16 OS=Homo sapiens GN=TRIM16 PE=1 SV=3	1	2	2	2	0	1	0	1	0	1	1	1	0	0	0	0	0	0	0	0	0	1	0	1	0	1	1	1	0	0	0	0	0	0	0	0	0	1	0	1	0	1
O95363	O95363	2	2	2	Phenylalanine--tRNA ligase, mitochondrial	FARS2	sp|O95363|SYFM_HUMAN Phenylalanine--tRNA ligase, mitochondrial OS=Homo sapiens GN=FARS2 PE=1 SV=1	1	2	2	2	1	0	0	0	0	0	1	1	1	1	0	0	2	0	1	1	1	0	0	0	0	0	1	1	1	1	0	0	2	0	1	1	1	0	0	0	0	0
O95365	O95365	2	2	2	Zinc finger and BTB domain-containing protein 7A	ZBTB7A	sp|O95365|ZBT7A_HUMAN Zinc finger and BTB domain-containing protein 7A OS=Homo sapiens GN=ZBTB7A PE=1 SV=1	1	2	2	2	0	0	1	0	0	1	0	0	0	0	0	1	0	0	0	0	0	0	1	0	0	1	0	0	0	0	0	1	0	0	0	0	0	0	1	0	0	1
O95372	O95372	1	1	1	Acyl-protein thioesterase 2	LYPLA2	sp|O95372|LYPA2_HUMAN Acyl-protein thioesterase 2 OS=Homo sapiens GN=LYPLA2 PE=1 SV=1	1	1	1	1	1	1	1	1	0	0	1	1	1	1	0	0	0	0	0	0	1	1	1	1	0	0	1	1	1	1	0	0	0	0	0	0	1	1	1	1	0	0
O95373	O95373	12	12	12	Importin-7	IPO7	sp|O95373|IPO7_HUMAN Importin-7 OS=Homo sapiens GN=IPO7 PE=1 SV=1	1	12	12	12	6	6	5	5	3	5	10	10	6	6	3	6	6	7	4	2	6	6	5	5	3	5	10	10	6	6	3	6	6	7	4	2	6	6	5	5	3	5
O95376	O95376	2	2	2	E3 ubiquitin-protein ligase ARIH2	ARIH2	sp|O95376|ARI2_HUMAN E3 ubiquitin-protein ligase ARIH2 OS=Homo sapiens GN=ARIH2 PE=1 SV=1	1	2	2	2	1	2	0	1	0	0	0	1	1	0	0	0	0	1	1	1	1	2	0	1	0	0	0	1	1	0	0	0	0	1	1	1	1	2	0	1	0	0
O95379	O95379	2	2	2	Tumor necrosis factor alpha-induced protein 8	TNFAIP8	sp|O95379|TFIP8_HUMAN Tumor necrosis factor alpha-induced protein 8 OS=Homo sapiens GN=TNFAIP8 PE=1 SV=1	1	2	2	2	2	0	0	1	1	0	1	0	1	1	1	1	1	1	1	0	2	0	0	1	1	0	1	0	1	1	1	1	1	1	1	0	2	0	0	1	1	0
O95382	O95382	1	1	1	Mitogen-activated protein kinase kinase kinase 6	MAP3K6	sp|O95382|M3K6_HUMAN Mitogen-activated protein kinase kinase kinase 6 OS=Homo sapiens GN=MAP3K6 PE=1 SV=3	1	1	1	1	0	0	1	0	0	0	1	0	0	0	0	0	0	0	0	0	0	0	1	0	0	0	1	0	0	0	0	0	0	0	0	0	0	0	1	0	0	0
O95391	O95391	4	4	4	Pre-mRNA-splicing factor SLU7	SLU7	sp|O95391|SLU7_HUMAN Pre-mRNA-splicing factor SLU7 OS=Homo sapiens GN=SLU7 PE=1 SV=2	1	4	4	4	2	1	2	1	0	0	4	0	3	0	1	0	2	0	2	0	2	1	2	1	0	0	4	0	3	0	1	0	2	0	2	0	2	1	2	1	0	0
O95394	O95394	3	3	3	Phosphoacetylglucosamine mutase	PGM3	sp|O95394|AGM1_HUMAN Phosphoacetylglucosamine mutase OS=Homo sapiens GN=PGM3 PE=1 SV=1	1	3	3	3	2	2	2	1	0	0	2	1	3	1	0	0	2	0	0	0	2	2	2	1	0	0	2	1	3	1	0	0	2	0	0	0	2	2	2	1	0	0
O95400	O95400	4	4	4	CD2 antigen cytoplasmic tail-binding protein 2	CD2BP2	sp|O95400|CD2B2_HUMAN CD2 antigen cytoplasmic tail-binding protein 2 OS=Homo sapiens GN=CD2BP2 PE=1 SV=1	1	4	4	4	1	1	2	2	0	2	0	2	2	1	0	0	3	1	1	0	1	1	2	2	0	2	0	2	2	1	0	0	3	1	1	0	1	1	2	2	0	2
O95406	O95406	2	2	2	Protein cornichon homolog 1	CNIH1	sp|O95406|CNIH1_HUMAN Protein cornichon homolog 1 OS=Homo sapiens GN=CNIH1 PE=1 SV=1	1	2	2	2	1	1	0	0	0	0	0	1	0	0	0	0	0	0	0	0	1	1	0	0	0	0	0	1	0	0	0	0	0	0	0	0	1	1	0	0	0	0
O95429	O95429	1	1	1	BAG family molecular chaperone regulator 4	BAG4	sp|O95429|BAG4_HUMAN BAG family molecular chaperone regulator 4 OS=Homo sapiens GN=BAG4 PE=1 SV=1	1	1	1	1	0	0	1	0	0	0	0	0	1	1	0	0	0	0	0	0	0	0	1	0	0	0	0	0	1	1	0	0	0	0	0	0	0	0	1	0	0	0
O95433	O95433	4	4	4	Activator of 90 kDa heat shock protein ATPase homolog 1	AHSA1	sp|O95433|AHSA1_HUMAN Activator of 90 kDa heat shock protein ATPase homolog 1 OS=Homo sapiens GN=AHSA1 PE=1 SV=1	1	4	4	4	2	4	3	2	0	0	2	2	1	2	0	0	1	1	1	0	2	4	3	2	0	0	2	2	1	2	0	0	1	1	1	0	2	4	3	2	0	0
O95456	O95456	1	1	1	Proteasome assembly chaperone 1	PSMG1	sp|O95456|PSMG1_HUMAN Proteasome assembly chaperone 1 OS=Homo sapiens GN=PSMG1 PE=1 SV=1	1	1	1	1	1	1	1	1	0	0	1	1	1	1	0	0	0	0	0	0	1	1	1	1	0	0	1	1	1	1	0	0	0	0	0	0	1	1	1	1	0	0
O95466	O95466	1	1	1	Formin-like protein 1	FMNL1	sp|O95466|FMNL1_HUMAN Formin-like protein 1 OS=Homo sapiens GN=FMNL1 PE=1 SV=3	1	1	1	1	0	0	0	0	0	0	0	1	0	0	0	0	0	1	0	0	0	0	0	0	0	0	0	1	0	0	0	0	0	1	0	0	0	0	0	0	0	0
O95470	O95470	2	2	2	Sphingosine-1-phosphate lyase 1	SGPL1	sp|O95470|SGPL1_HUMAN Sphingosine-1-phosphate lyase 1 OS=Homo sapiens GN=SGPL1 PE=1 SV=3	1	2	2	2	1	1	0	0	0	0	0	1	0	0	0	1	0	1	0	0	1	1	0	0	0	0	0	1	0	0	0	1	0	1	0	0	1	1	0	0	0	0
O95476	O95476	1	1	1	CTD nuclear envelope phosphatase 1	CTDNEP1	sp|O95476|CNEP1_HUMAN CTD nuclear envelope phosphatase 1 OS=Homo sapiens GN=CTDNEP1 PE=1 SV=2	1	1	1	1	0	1	1	1	1	1	1	0	0	1	0	1	1	1	0	0	0	1	1	1	1	1	1	0	0	1	0	1	1	1	0	0	0	1	1	1	1	1
O95478	O95478	1	1	1	Ribosome biogenesis protein NSA2 homolog	NSA2	sp|O95478|NSA2_HUMAN Ribosome biogenesis protein NSA2 homolog OS=Homo sapiens GN=NSA2 PE=1 SV=1	1	1	1	1	1	1	1	1	1	0	1	1	1	0	1	1	0	1	0	0	1	1	1	1	1	0	1	1	1	0	1	1	0	1	0	0	1	1	1	1	1	0
O95486	O95486	3	3	3	Protein transport protein Sec24A	SEC24A	sp|O95486|SC24A_HUMAN Protein transport protein Sec24A OS=Homo sapiens GN=SEC24A PE=1 SV=2	1	3	3	3	0	1	2	1	0	0	2	2	2	2	0	1	0	0	1	0	0	1	2	1	0	0	2	2	2	2	0	1	0	0	1	0	0	1	2	1	0	0
O95487	O95487	4	4	4	Protein transport protein Sec24B	SEC24B	sp|O95487|SC24B_HUMAN Protein transport protein Sec24B OS=Homo sapiens GN=SEC24B PE=1 SV=2	1	4	4	4	2	2	2	2	0	0	2	1	2	2	0	0	0	0	0	0	2	2	2	2	0	0	2	1	2	2	0	0	0	0	0	0	2	2	2	2	0	0
O95571	O95571	2	2	2	Persulfide dioxygenase ETHE1, mitochondrial	ETHE1	sp|O95571|ETHE1_HUMAN Persulfide dioxygenase ETHE1, mitochondrial OS=Homo sapiens GN=ETHE1 PE=1 SV=2	1	2	2	2	0	0	0	0	0	0	0	0	0	1	1	0	0	1	0	0	0	0	0	0	0	0	0	0	0	1	1	0	0	1	0	0	0	0	0	0	0	0
O95573	O95573	7	7	7	Long-chain-fatty-acid--CoA ligase 3	ACSL3	sp|O95573|ACSL3_HUMAN Long-chain-fatty-acid--CoA ligase 3 OS=Homo sapiens GN=ACSL3 PE=1 SV=3	1	7	7	7	5	4	4	3	4	3	4	3	3	4	5	4	4	5	3	3	5	4	4	3	4	3	4	3	3	4	5	4	4	5	3	3	5	4	4	3	4	3
O95602	O95602	8	8	8	DNA-directed RNA polymerase I subunit RPA1	POLR1A	sp|O95602|RPA1_HUMAN DNA-directed RNA polymerase I subunit RPA1 OS=Homo sapiens GN=POLR1A PE=1 SV=2	1	8	8	8	1	2	3	3	1	2	3	2	7	5	2	2	2	1	2	0	1	2	3	3	1	2	3	2	7	5	2	2	2	1	2	0	1	2	3	3	1	2
O95613	O95613	4	4	4	Pericentrin	PCNT	sp|O95613|PCNT_HUMAN Pericentrin OS=Homo sapiens GN=PCNT PE=1 SV=4	1	4	4	4	2	0	2	1	0	0	2	0	1	3	1	1	0	0	2	0	2	0	2	1	0	0	2	0	1	3	1	1	0	0	2	0	2	0	2	1	0	0
O95619	O95619	1	1	1	YEATS domain-containing protein 4	YEATS4	sp|O95619|YETS4_HUMAN YEATS domain-containing protein 4 OS=Homo sapiens GN=YEATS4 PE=1 SV=1	1	1	1	1	0	0	1	1	1	1	1	1	1	1	1	0	1	0	1	0	0	0	1	1	1	1	1	1	1	1	1	0	1	0	1	0	0	0	1	1	1	1
O95631	O95631	1	1	1	Netrin-1	NTN1	sp|O95631|NET1_HUMAN Netrin-1 OS=Homo sapiens GN=NTN1 PE=1 SV=2	1	1	1	1	0	0	0	0	1	1	0	0	0	0	0	0	0	0	0	0	0	0	0	0	1	1	0	0	0	0	0	0	0	0	0	0	0	0	0	0	1	1
O95639	O95639	2	2	2	Cleavage and polyadenylation specificity factor subunit 4	CPSF4	sp|O95639|CPSF4_HUMAN Cleavage and polyadenylation specificity factor subunit 4 OS=Homo sapiens GN=CPSF4 PE=1 SV=1	1	2	2	2	0	1	0	1	0	0	0	2	0	0	0	0	0	0	0	1	0	1	0	1	0	0	0	2	0	0	0	0	0	0	0	1	0	1	0	1	0	0
O95671	O95671	1	1	1	N-acetylserotonin O-methyltransferase-like protein	ASMTL	sp|O95671|ASML_HUMAN N-acetylserotonin O-methyltransferase-like protein OS=Homo sapiens GN=ASMTL PE=1 SV=3	1	1	1	1	1	1	1	0	0	0	0	0	0	1	0	0	0	0	0	0	1	1	1	0	0	0	0	0	0	1	0	0	0	0	0	0	1	1	1	0	0	0
O95674	O95674	2	2	2	Phosphatidate cytidylyltransferase 2	CDS2	sp|O95674|CDS2_HUMAN Phosphatidate cytidylyltransferase 2 OS=Homo sapiens GN=CDS2 PE=1 SV=1	1	2	2	2	0	0	1	0	1	1	2	2	1	1	0	1	1	1	0	0	0	0	1	0	1	1	2	2	1	1	0	1	1	1	0	0	0	0	1	0	1	1
O95684	O95684	4	4	4	FGFR1 oncogene partner	FGFR1OP	sp|O95684|FR1OP_HUMAN FGFR1 oncogene partner OS=Homo sapiens GN=FGFR1OP PE=1 SV=1	1	4	4	4	0	0	1	0	0	0	1	0	2	1	0	0	1	1	0	0	0	0	1	0	0	0	1	0	2	1	0	0	1	1	0	0	0	0	1	0	0	0
O95696	O95696	2	2	2	Bromodomain-containing protein 1	BRD1	sp|O95696|BRD1_HUMAN Bromodomain-containing protein 1 OS=Homo sapiens GN=BRD1 PE=1 SV=1	1	2	2	2	1	0	1	0	0	0	1	0	1	2	0	0	0	1	1	0	1	0	1	0	0	0	1	0	1	2	0	0	0	1	1	0	1	0	1	0	0	0
O95714;Q9BVR0	O95714	16;1	16;1	16;1	E3 ubiquitin-protein ligase HERC2	HERC2	sp|O95714|HERC2_HUMAN E3 ubiquitin-protein ligase HERC2 OS=Homo sapiens GN=HERC2 PE=1 SV=2	2	16	16	16	8	6	6	10	3	2	9	6	8	5	3	3	4	3	5	1	8	6	6	10	3	2	9	6	8	5	3	3	4	3	5	1	8	6	6	10	3	2
O95721	O95721	2	2	2	Synaptosomal-associated protein 29	SNAP29	sp|O95721|SNP29_HUMAN Synaptosomal-associated protein 29 OS=Homo sapiens GN=SNAP29 PE=1 SV=1	1	2	2	2	1	1	0	1	0	0	0	1	1	0	0	0	1	0	0	0	1	1	0	1	0	0	0	1	1	0	0	0	1	0	0	0	1	1	0	1	0	0
O95747	O95747	4	4	4	Serine/threonine-protein kinase OSR1	OXSR1	sp|O95747|OXSR1_HUMAN Serine/threonine-protein kinase OSR1 OS=Homo sapiens GN=OXSR1 PE=1 SV=1	1	4	4	4	1	1	1	1	2	2	3	3	0	1	0	1	1	1	0	0	1	1	1	1	2	2	3	3	0	1	0	1	1	1	0	0	1	1	1	1	2	2
O95757	O95757	6	5	5	Heat shock 70 kDa protein 4L	HSPA4L	sp|O95757|HS74L_HUMAN Heat shock 70 kDa protein 4L OS=Homo sapiens GN=HSPA4L PE=1 SV=3	1	6	5	5	2	2	1	3	0	0	3	2	3	2	0	0	0	2	1	0	2	1	1	3	0	0	3	2	3	2	0	0	0	2	1	0	2	1	1	3	0	0
O95758	O95758	4	4	4	Polypyrimidine tract-binding protein 3	PTBP3	sp|O95758|PTBP3_HUMAN Polypyrimidine tract-binding protein 3 OS=Homo sapiens GN=PTBP3 PE=1 SV=2	1	4	4	4	0	0	0	0	0	0	1	3	1	1	0	0	0	1	1	0	0	0	0	0	0	0	1	3	1	1	0	0	0	1	1	0	0	0	0	0	0	0
O95777	O95777	2	2	2	U6 snRNA-associated Sm-like protein LSm8	LSM8	sp|O95777|LSM8_HUMAN U6 snRNA-associated Sm-like protein LSm8 OS=Homo sapiens GN=LSM8 PE=1 SV=3	1	2	2	2	0	1	1	0	0	0	1	1	1	1	0	0	0	1	0	0	0	1	1	0	0	0	1	1	1	1	0	0	0	1	0	0	0	1	1	0	0	0
O95782	O95782	11	11	11	AP-2 complex subunit alpha-1	AP2A1	sp|O95782|AP2A1_HUMAN AP-2 complex subunit alpha-1 OS=Homo sapiens GN=AP2A1 PE=1 SV=3	1	11	11	11	4	5	6	4	4	3	5	6	4	5	3	3	6	5	3	2	4	5	6	4	4	3	5	6	4	5	3	3	6	5	3	2	4	5	6	4	4	3
O95785	O95785	4	4	4	Protein Wiz	WIZ	sp|O95785|WIZ_HUMAN Protein Wiz OS=Homo sapiens GN=WIZ PE=1 SV=2	1	4	4	4	3	3	4	3	0	3	1	1	2	2	1	3	3	1	3	1	3	3	4	3	0	3	1	1	2	2	1	3	3	1	3	1	3	3	4	3	0	3
O95786	O95786	2	2	2	Probable ATP-dependent RNA helicase DDX58	DDX58	sp|O95786|DDX58_HUMAN Probable ATP-dependent RNA helicase DDX58 OS=Homo sapiens GN=DDX58 PE=1 SV=2	1	2	2	2	1	0	1	0	0	0	1	1	0	1	0	0	1	0	1	0	1	0	1	0	0	0	1	1	0	1	0	0	1	0	1	0	1	0	1	0	0	0
O95793	O95793	4	4	4	Double-stranded RNA-binding protein Staufen homolog 1	STAU1	sp|O95793|STAU1_HUMAN Double-stranded RNA-binding protein Staufen homolog 1 OS=Homo sapiens GN=STAU1 PE=1 SV=2	1	4	4	4	1	1	1	0	0	0	2	3	1	0	0	0	0	1	0	0	1	1	1	0	0	0	2	3	1	0	0	0	0	1	0	0	1	1	1	0	0	0
O95801	O95801	7	7	6	Tetratricopeptide repeat protein 4	TTC4	sp|O95801|TTC4_HUMAN Tetratricopeptide repeat protein 4 OS=Homo sapiens GN=TTC4 PE=1 SV=3	1	7	7	6	3	5	1	3	0	2	4	3	3	4	2	1	1	3	4	1	3	5	1	3	0	2	4	3	3	4	2	1	1	3	4	1	3	5	1	3	0	2
O95810	O95810	3	3	3	Serum deprivation-response protein	SDPR	sp|O95810|SDPR_HUMAN Serum deprivation-response protein OS=Homo sapiens GN=SDPR PE=1 SV=3	1	3	3	3	3	3	1	0	3	3	3	2	2	1	1	2	3	2	0	0	3	3	1	0	3	3	3	2	2	1	1	2	3	2	0	0	3	3	1	0	3	3
O95816	O95816	1	1	1	BAG family molecular chaperone regulator 2	BAG2	sp|O95816|BAG2_HUMAN BAG family molecular chaperone regulator 2 OS=Homo sapiens GN=BAG2 PE=1 SV=1	1	1	1	1	0	1	0	0	0	0	1	1	1	0	0	0	1	1	0	0	0	1	0	0	0	0	1	1	1	0	0	0	1	1	0	0	0	1	0	0	0	0
O95817	O95817	8	8	7	BAG family molecular chaperone regulator 3	BAG3	sp|O95817|BAG3_HUMAN BAG family molecular chaperone regulator 3 OS=Homo sapiens GN=BAG3 PE=1 SV=3	1	8	8	7	3	2	3	4	2	2	4	4	4	4	2	3	4	3	1	0	3	2	3	4	2	2	4	4	4	4	2	3	4	3	1	0	3	2	3	4	2	2
O95819;Q8N4C8	O95819	5;1	5;1	5;1	Mitogen-activated protein kinase kinase kinase kinase 4	MAP4K4	sp|O95819|M4K4_HUMAN Mitogen-activated protein kinase kinase kinase kinase 4 OS=Homo sapiens GN=MAP4K4 PE=1 SV=2	2	5	5	5	2	1	1	0	0	0	0	1	0	0	1	1	1	2	1	0	2	1	1	0	0	0	0	1	0	0	1	1	1	2	1	0	2	1	1	0	0	0
O95825	O95825	2	2	2	Quinone oxidoreductase-like protein 1	CRYZL1	sp|O95825|QORL1_HUMAN Quinone oxidoreductase-like protein 1 OS=Homo sapiens GN=CRYZL1 PE=1 SV=2	1	2	2	2	0	1	0	0	0	0	1	1	1	1	0	0	1	0	1	0	0	1	0	0	0	0	1	1	1	1	0	0	1	0	1	0	0	1	0	0	0	0
O95831	O95831	1	1	1	Apoptosis-inducing factor 1, mitochondrial	AIFM1	sp|O95831|AIFM1_HUMAN Apoptosis-inducing factor 1, mitochondrial OS=Homo sapiens GN=AIFM1 PE=1 SV=1	1	1	1	1	0	0	0	0	0	0	0	0	0	0	0	1	0	0	1	0	0	0	0	0	0	0	0	0	0	0	0	1	0	0	1	0	0	0	0	0	0	0
O95857	O95857	1	1	1	Tetraspanin-13	TSPAN13	sp|O95857|TSN13_HUMAN Tetraspanin-13 OS=Homo sapiens GN=TSPAN13 PE=2 SV=1	1	1	1	1	0	1	0	0	0	0	1	0	1	1	0	0	1	0	0	0	0	1	0	0	0	0	1	0	1	1	0	0	1	0	0	0	0	1	0	0	0	0
O95861	O95861	3	3	3	3(2),5-bisphosphate nucleotidase 1	BPNT1	sp|O95861|BPNT1_HUMAN 3(2),5-bisphosphate nucleotidase 1 OS=Homo sapiens GN=BPNT1 PE=1 SV=1	1	3	3	3	2	2	1	2	1	2	3	3	2	2	1	1	1	0	1	0	2	2	1	2	1	2	3	3	2	2	1	1	1	0	1	0	2	2	1	2	1	2
O95864	O95864	1	1	1	Fatty acid desaturase 2	FADS2	sp|O95864|FADS2_HUMAN Fatty acid desaturase 2 OS=Homo sapiens GN=FADS2 PE=1 SV=1	1	1	1	1	0	1	1	1	0	0	1	0	1	0	0	0	0	0	0	0	0	1	1	1	0	0	1	0	1	0	0	0	0	0	0	0	0	1	1	1	0	0
O95865	O95865	2	2	2	N(G),N(G)-dimethylarginine dimethylaminohydrolase 2	DDAH2	sp|O95865|DDAH2_HUMAN N(G),N(G)-dimethylarginine dimethylaminohydrolase 2 OS=Homo sapiens GN=DDAH2 PE=1 SV=1	1	2	2	2	0	0	0	1	0	0	2	0	0	1	0	1	0	0	0	0	0	0	0	1	0	0	2	0	0	1	0	1	0	0	0	0	0	0	0	1	0	0
O95870	O95870	2	2	2	Abhydrolase domain-containing protein 16A	ABHD16A	sp|O95870|ABHGA_HUMAN Protein ABHD16A OS=Homo sapiens GN=ABHD16A PE=1 SV=3	1	2	2	2	1	1	2	1	1	1	2	0	1	1	0	1	1	0	1	0	1	1	2	1	1	1	2	0	1	1	0	1	1	0	1	0	1	1	2	1	1	1
O95881	O95881	1	1	1	Thioredoxin domain-containing protein 12	TXNDC12	sp|O95881|TXD12_HUMAN Thioredoxin domain-containing protein 12 OS=Homo sapiens GN=TXNDC12 PE=1 SV=1	1	1	1	1	1	1	1	1	0	0	1	1	0	0	0	0	0	1	0	0	1	1	1	1	0	0	1	1	0	0	0	0	0	1	0	0	1	1	1	1	0	0
O95905	O95905	5	5	5	Protein SGT1	ECD	sp|O95905|ECD_HUMAN Protein ecdysoneless homolog OS=Homo sapiens GN=ECD PE=1 SV=1	1	5	5	5	2	3	2	1	3	2	3	2	3	2	2	3	2	2	1	0	2	3	2	1	3	2	3	2	3	2	2	3	2	2	1	0	2	3	2	1	3	2
O95980	O95980	3	3	3	Reversion-inducing cysteine-rich protein with Kazal motifs	RECK	sp|O95980|RECK_HUMAN Reversion-inducing cysteine-rich protein with Kazal motifs OS=Homo sapiens GN=RECK PE=1 SV=1	1	3	3	3	0	0	1	1	0	0	0	1	0	1	0	1	0	0	1	0	0	0	1	1	0	0	0	1	0	1	0	1	0	0	1	0	0	0	1	1	0	0
O95983	O95983	2	2	2	Methyl-CpG-binding domain protein 3	MBD3	sp|O95983|MBD3_HUMAN Methyl-CpG-binding domain protein 3 OS=Homo sapiens GN=MBD3 PE=1 SV=1	1	2	2	2	0	0	1	2	0	0	2	1	2	1	0	0	0	0	0	0	0	0	1	2	0	0	2	1	2	1	0	0	0	0	0	0	0	0	1	2	0	0
O96000	O96000	1	1	1	NADH dehydrogenase [ubiquinone] 1 beta subcomplex subunit 10	NDUFB10	sp|O96000|NDUBA_HUMAN NADH dehydrogenase [ubiquinone] 1 beta subcomplex subunit 10 OS=Homo sapiens GN=NDUFB10 PE=1 SV=3	1	1	1	1	1	0	1	1	1	1	1	1	1	1	0	0	1	1	0	0	1	0	1	1	1	1	1	1	1	1	0	0	1	1	0	0	1	0	1	1	1	1
O96005	O96005	7	7	7	Cleft lip and palate transmembrane protein 1	CLPTM1	sp|O96005|CLPT1_HUMAN Cleft lip and palate transmembrane protein 1 OS=Homo sapiens GN=CLPTM1 PE=1 SV=1	1	7	7	7	3	4	4	4	4	5	5	3	3	3	4	5	3	3	2	0	3	4	4	4	4	5	5	3	3	3	4	5	3	3	2	0	3	4	4	4	4	5
O96007	O96007	1	1	1	Molybdopterin synthase catalytic subunit	MOCS2	sp|O96007|MOC2B_HUMAN Molybdopterin synthase catalytic subunit OS=Homo sapiens GN=MOCS2 PE=1 SV=1	1	1	1	1	1	0	1	0	0	0	0	0	1	0	0	0	0	0	1	0	1	0	1	0	0	0	0	0	1	0	0	0	0	0	1	0	1	0	1	0	0	0
O96008	O96008	4	4	4	Mitochondrial import receptor subunit TOM40 homolog	TOMM40	sp|O96008|TOM40_HUMAN Mitochondrial import receptor subunit TOM40 homolog OS=Homo sapiens GN=TOMM40 PE=1 SV=1	1	4	4	4	2	2	3	3	1	1	4	3	3	3	1	1	2	2	2	2	2	2	3	3	1	1	4	3	3	3	1	1	2	2	2	2	2	2	3	3	1	1
O96011	O96011	1	1	1	Peroxisomal membrane protein 11B	PEX11B	sp|O96011|PX11B_HUMAN Peroxisomal membrane protein 11B OS=Homo sapiens GN=PEX11B PE=1 SV=1	1	1	1	1	1	1	0	1	0	1	1	1	0	0	0	1	0	1	1	0	1	1	0	1	0	1	1	1	0	0	0	1	0	1	1	0	1	1	0	1	0	1
O96013	O96013	3	3	3	Serine/threonine-protein kinase PAK 4	PAK4	sp|O96013|PAK4_HUMAN Serine/threonine-protein kinase PAK 4 OS=Homo sapiens GN=PAK4 PE=1 SV=1	1	3	3	3	0	0	0	0	0	1	1	1	1	0	0	0	2	1	1	0	0	0	0	0	0	1	1	1	1	0	0	0	2	1	1	0	0	0	0	0	0	1
O96019	O96019	5	5	5	Actin-like protein 6A	ACTL6A	sp|O96019|ACL6A_HUMAN Actin-like protein 6A OS=Homo sapiens GN=ACTL6A PE=1 SV=1	1	5	5	5	2	4	2	1	1	2	3	4	4	3	2	2	1	2	2	2	2	4	2	1	1	2	3	4	4	3	2	2	1	2	2	2	2	4	2	1	1	2
O96028	O96028	6	6	6	Histone-lysine N-methyltransferase NSD2	WHSC1	sp|O96028|NSD2_HUMAN Histone-lysine N-methyltransferase NSD2 OS=Homo sapiens GN=WHSC1 PE=1 SV=1	1	6	6	6	2	3	2	3	0	1	2	2	4	3	1	1	2	0	2	0	2	3	2	3	0	1	2	2	4	3	1	1	2	0	2	0	2	3	2	3	0	1
P00167	P00167	1	1	1	Cytochrome b5	CYB5A	sp|P00167|CYB5_HUMAN Cytochrome b5 OS=Homo sapiens GN=CYB5A PE=1 SV=2	1	1	1	1	0	1	0	0	0	1	1	0	0	0	0	0	0	1	1	0	0	1	0	0	0	1	1	0	0	0	0	0	0	1	1	0	0	1	0	0	0	1
P00338	P00338	5	5	5	L-lactate dehydrogenase A chain	LDHA	sp|P00338|LDHA_HUMAN L-lactate dehydrogenase A chain OS=Homo sapiens GN=LDHA PE=1 SV=2	1	5	5	5	1	3	2	2	1	1	4	4	4	3	1	2	1	3	2	2	1	3	2	2	1	1	4	4	4	3	1	2	1	3	2	2	1	3	2	2	1	1
P00367;P49448	P00367	6;2	6;2	6;2	Glutamate dehydrogenase 1, mitochondrial	GLUD1	sp|P00367|DHE3_HUMAN Glutamate dehydrogenase 1, mitochondrial OS=Homo sapiens GN=GLUD1 PE=1 SV=2	2	6	6	6	4	5	3	3	2	3	5	4	4	2	3	3	4	4	3	2	4	5	3	3	2	3	5	4	4	2	3	3	4	4	3	2	4	5	3	3	2	3
P00374	P00374	1	1	1	Dihydrofolate reductase	DHFR	sp|P00374|DYR_HUMAN Dihydrofolate reductase OS=Homo sapiens GN=DHFR PE=1 SV=2	1	1	1	1	1	1	1	1	1	1	1	1	0	1	0	1	1	1	1	0	1	1	1	1	1	1	1	1	0	1	0	1	1	1	1	0	1	1	1	1	1	1
P00387	P00387	5	5	5	NADH-cytochrome b5 reductase 3;NADH-cytochrome b5 reductase 3 membrane-bound form;NADH-cytochrome b5 reductase 3 soluble form	CYB5R3	sp|P00387|NB5R3_HUMAN NADH-cytochrome b5 reductase 3 OS=Homo sapiens GN=CYB5R3 PE=1 SV=3	1	5	5	5	1	3	3	1	2	1	4	5	2	2	1	1	3	5	1	3	1	3	3	1	2	1	4	5	2	2	1	1	3	5	1	3	1	3	3	1	2	1
P00390	P00390	4	4	4	Glutathione reductase, mitochondrial	GSR	sp|P00390|GSHR_HUMAN Glutathione reductase, mitochondrial OS=Homo sapiens GN=GSR PE=1 SV=2	1	4	4	4	0	0	0	0	0	0	1	1	3	0	0	1	0	2	0	0	0	0	0	0	0	0	1	1	3	0	0	1	0	2	0	0	0	0	0	0	0	0
P00395	P00395	2	2	2	Cytochrome c oxidase subunit 1	MT-CO1	sp|P00395|COX1_HUMAN Cytochrome c oxidase subunit 1 OS=Homo sapiens GN=MT-CO1 PE=1 SV=1	1	2	2	2	2	2	1	1	2	2	1	1	1	1	1	2	2	1	1	1	2	2	1	1	2	2	1	1	1	1	1	2	2	1	1	1	2	2	1	1	2	2
P00403	P00403	4	4	4	Cytochrome c oxidase subunit 2	MT-CO2	sp|P00403|COX2_HUMAN Cytochrome c oxidase subunit 2 OS=Homo sapiens GN=MT-CO2 PE=1 SV=1	1	4	4	4	2	1	0	0	1	1	2	2	1	1	0	1	1	2	1	0	2	1	0	0	1	1	2	2	1	1	0	1	1	2	1	0	2	1	0	0	1	1
P00441	P00441	3	3	3	Superoxide dismutase [Cu-Zn]	SOD1	sp|P00441|SODC_HUMAN Superoxide dismutase [Cu-Zn] OS=Homo sapiens GN=SOD1 PE=1 SV=2	1	3	3	3	2	1	1	1	0	0	1	0	2	1	0	0	2	1	1	0	2	1	1	1	0	0	1	0	2	1	0	0	2	1	1	0	2	1	1	1	0	0
P00491	P00491	2	2	2	Purine nucleoside phosphorylase	PNP	sp|P00491|PNPH_HUMAN Purine nucleoside phosphorylase OS=Homo sapiens GN=PNP PE=1 SV=2	1	2	2	2	2	1	1	2	2	0	2	2	1	2	0	0	1	1	1	0	2	1	1	2	2	0	2	2	1	2	0	0	1	1	1	0	2	1	1	2	2	0
P00492	P00492	1	1	1	Hypoxanthine-guanine phosphoribosyltransferase	HPRT1	sp|P00492|HPRT_HUMAN Hypoxanthine-guanine phosphoribosyltransferase OS=Homo sapiens GN=HPRT1 PE=1 SV=2	1	1	1	1	1	1	0	1	0	1	1	1	1	1	0	0	1	1	1	0	1	1	0	1	0	1	1	1	1	1	0	0	1	1	1	0	1	1	0	1	0	1
P00505	P00505	5	5	5	Aspartate aminotransferase, mitochondrial	GOT2	sp|P00505|AATM_HUMAN Aspartate aminotransferase, mitochondrial OS=Homo sapiens GN=GOT2 PE=1 SV=3	1	5	5	5	3	3	1	3	1	1	4	4	3	3	1	2	1	4	1	2	3	3	1	3	1	1	4	4	3	3	1	2	1	4	1	2	3	3	1	3	1	1
P00533	P00533	15	15	15	Epidermal growth factor receptor	EGFR	sp|P00533|EGFR_HUMAN Epidermal growth factor receptor OS=Homo sapiens GN=EGFR PE=1 SV=2	1	15	15	15	6	4	4	5	3	4	8	10	7	7	1	3	9	5	2	2	6	4	4	5	3	4	8	10	7	7	1	3	9	5	2	2	6	4	4	5	3	4
P00558	P00558	4	4	4	Phosphoglycerate kinase 1	PGK1	sp|P00558|PGK1_HUMAN Phosphoglycerate kinase 1 OS=Homo sapiens GN=PGK1 PE=1 SV=3	1	4	4	4	3	3	3	2	2	3	3	3	3	2	2	3	3	4	2	2	3	3	3	2	2	3	3	3	3	2	2	3	3	4	2	2	3	3	3	2	2	3
P00568	P00568	1	1	1	Adenylate kinase isoenzyme 1	AK1	sp|P00568|KAD1_HUMAN Adenylate kinase isoenzyme 1 OS=Homo sapiens GN=AK1 PE=1 SV=3	1	1	1	1	1	1	1	1	1	0	1	1	1	1	0	1	1	0	1	0	1	1	1	1	1	0	1	1	1	1	0	1	1	0	1	0	1	1	1	1	1	0
P01008	P01008	1	1	1	Antithrombin-III	SERPINC1	sp|P01008|ANT3_HUMAN Antithrombin-III OS=Homo sapiens GN=SERPINC1 PE=1 SV=1	1	1	1	1	1	1	1	1	1	1	1	1	1	1	1	1	1	1	0	0	1	1	1	1	1	1	1	1	1	1	1	1	1	1	0	0	1	1	1	1	1	1
P01023	P01023	1	1	1	Alpha-2-macroglobulin	A2M	sp|P01023|A2MG_HUMAN Alpha-2-macroglobulin OS=Homo sapiens GN=A2M PE=1 SV=3	1	1	1	1	0	1	1	1	0	0	0	0	1	0	0	0	0	0	0	0	0	1	1	1	0	0	0	0	1	0	0	0	0	0	0	0	0	1	1	1	0	0
P01024	P01024	4	4	4	Complement C3;Complement C3 beta chain;C3-beta-c;Complement C3 alpha chain;C3a anaphylatoxin;Acylation stimulating protein;Complement C3b alpha chain;Complement C3c alpha chain fragment 1;Complement C3dg fragment;Complement C3g fragment;Complement C3d fragment;Complement C3f fragment;Complement C3c alpha chain fragment 2	C3	sp|P01024|CO3_HUMAN Complement C3 OS=Homo sapiens GN=C3 PE=1 SV=2	1	4	4	4	0	0	0	0	0	0	0	1	1	1	0	0	0	0	1	0	0	0	0	0	0	0	0	1	1	1	0	0	0	0	1	0	0	0	0	0	0	0
P01040	P01040	1	1	1	Cystatin-A;Cystatin-A, N-terminally processed	CSTA	sp|P01040|CYTA_HUMAN Cystatin-A OS=Homo sapiens GN=CSTA PE=1 SV=1	1	1	1	1	0	1	0	0	1	0	1	0	0	1	0	1	1	0	0	1	0	1	0	0	1	0	1	0	0	1	0	1	1	0	0	1	0	1	0	0	1	0
P01116;P01112;P01111	P01116;P01112;P01111	2;2;2	2;2;2	2;2;2	GTPase KRas;GTPase KRas, N-terminally processed;GTPase HRas;GTPase HRas, N-terminally processed;GTPase NRas	KRAS;HRAS;NRAS	sp|P01116|RASK_HUMAN GTPase KRas OS=Homo sapiens GN=KRAS PE=1 SV=1;sp|P01112|RASH_HUMAN GTPase HRas OS=Homo sapiens GN=HRAS PE=1 SV=1;sp|P01111|RASN_HUMAN GTPase NRas OS=Homo sapiens GN=NRAS PE=1 SV=1	3	2	2	2	0	0	1	2	2	1	1	0	1	2	1	1	1	1	1	0	0	0	1	2	2	1	1	0	1	2	1	1	1	1	1	0	0	0	1	2	2	1
P01130	P01130	6	6	6	Low-density lipoprotein receptor	LDLR	sp|P01130|LDLR_HUMAN Low-density lipoprotein receptor OS=Homo sapiens GN=LDLR PE=1 SV=1	1	6	6	6	1	0	1	2	0	0	3	1	1	3	0	0	2	2	2	0	1	0	1	2	0	0	3	1	1	3	0	0	2	2	2	0	1	0	1	2	0	0
P01137	P01137	1	1	1	Transforming growth factor beta-1;Latency-associated peptide	TGFB1	sp|P01137|TGFB1_HUMAN Transforming growth factor beta-1 OS=Homo sapiens GN=TGFB1 PE=1 SV=2	1	1	1	1	0	0	1	1	1	0	1	0	0	0	1	1	1	0	1	0	0	0	1	1	1	0	1	0	0	0	1	1	1	0	1	0	0	0	1	1	1	0
P01241	P01241	1	1	1	Somatotropin	GH1	sp|P01241|SOMA_HUMAN Somatotropin OS=Homo sapiens GN=GH1 PE=1 SV=2	1	1	1	1	0	0	0	0	0	1	0	0	0	0	0	0	0	0	0	0	0	0	0	0	0	1	0	0	0	0	0	0	0	0	0	0	0	0	0	0	0	1
P01834	P01834	1	1	1	Ig kappa chain C region	IGKC	sp|P01834|IGKC_HUMAN Ig kappa chain C region OS=Homo sapiens GN=IGKC PE=1 SV=1	1	1	1	1	0	0	0	0	0	1	1	0	1	0	0	0	1	1	1	0	0	0	0	0	0	1	1	0	1	0	0	0	1	1	1	0	0	0	0	0	0	1
P01892;P10316;P01891	P01892;P10316;P01891	6;5;5	6;5;5	0;0;0	HLA class I histocompatibility antigen, A-2 alpha chain;HLA class I histocompatibility antigen, A-69 alpha chain;HLA class I histocompatibility antigen, A-68 alpha chain	HLA-A	sp|P01892|1A02_HUMAN HLA class I histocompatibility antigen, A-2 alpha chain OS=Homo sapiens GN=HLA-A PE=1 SV=1;sp|P10316|1A69_HUMAN HLA class I histocompatibility antigen, A-69 alpha chain OS=Homo sapiens GN=HLA-A PE=1 SV=2;sp|P01891|1A68_HUMAN HLA class	3	6	6	0	3	3	3	2	3	3	4	3	3	3	4	3	3	5	2	2	3	3	3	2	3	3	4	3	3	3	4	3	3	5	2	2	0	0	0	0	0	0
P02452	P02452	10	10	9	Collagen alpha-1(I) chain	COL1A1	sp|P02452|CO1A1_HUMAN Collagen alpha-1(I) chain OS=Homo sapiens GN=COL1A1 PE=1 SV=5	1	10	10	9	4	4	5	3	2	2	4	3	4	4	5	4	5	5	4	0	4	4	5	3	2	2	4	3	4	4	5	4	5	5	4	0	4	4	5	3	2	2
P02461	P02461	1	1	1	Collagen alpha-1(III) chain	COL3A1	sp|P02461|CO3A1_HUMAN Collagen alpha-1(III) chain OS=Homo sapiens GN=COL3A1 PE=1 SV=4	1	1	1	1	0	0	1	0	0	0	1	0	0	1	0	0	0	0	0	0	0	0	1	0	0	0	1	0	0	1	0	0	0	0	0	0	0	0	1	0	0	0
P02489	P02489	1	1	1	Alpha-crystallin A chain;Alpha-crystallin A(1-172);Alpha-crystallin A(1-168);Alpha-crystallin A(1-162)	CRYAA	sp|P02489|CRYAA_HUMAN Alpha-crystallin A chain OS=Homo sapiens GN=CRYAA PE=1 SV=2	1	1	1	1	0	0	0	0	0	0	0	0	1	1	0	0	0	0	0	0	0	0	0	0	0	0	0	0	1	1	0	0	0	0	0	0	0	0	0	0	0	0
P02545	P02545	11	11	11	Prelamin-A/C;Lamin-A/C	LMNA	sp|P02545|LMNA_HUMAN Prelamin-A/C OS=Homo sapiens GN=LMNA PE=1 SV=1	1	11	11	11	3	3	5	5	4	4	5	3	4	4	4	4	3	2	5	2	3	3	5	5	4	4	5	3	4	4	4	4	3	2	5	2	3	3	5	5	4	4
P02652	P02652	1	1	1	Apolipoprotein A-II;Proapolipoprotein A-II;Truncated apolipoprotein A-II	APOA2	sp|P02652|APOA2_HUMAN Apolipoprotein A-II OS=Homo sapiens GN=APOA2 PE=1 SV=1	1	1	1	1	0	0	0	0	0	1	0	0	0	0	0	0	0	0	0	0	0	0	0	0	0	1	0	0	0	0	0	0	0	0	0	0	0	0	0	0	0	1
P02751	P02751	32	32	32	Fibronectin;Anastellin;Ugl-Y1;Ugl-Y2;Ugl-Y3	FN1	sp|P02751|FINC_HUMAN Fibronectin OS=Homo sapiens GN=FN1 PE=1 SV=4	1	32	32	32	22	18	16	16	12	14	19	19	15	16	12	12	16	13	10	5	22	18	16	16	12	14	19	19	15	16	12	12	16	13	10	5	22	18	16	16	12	14
P02774	P02774	3	1	1	Vitamin D-binding protein	GC	sp|P02774|VTDB_HUMAN Vitamin D-binding protein OS=Homo sapiens GN=GC PE=1 SV=1	1	3	1	1	2	2	2	2	2	1	2	2	2	3	2	2	1	2	2	0	0	0	0	0	0	0	0	0	1	1	0	0	0	0	0	0	0	0	0	0	0	0
P02786	P02786	5	5	5	Transferrin receptor protein 1;Transferrin receptor protein 1, serum form	TFRC	sp|P02786|TFR1_HUMAN Transferrin receptor protein 1 OS=Homo sapiens GN=TFRC PE=1 SV=2	1	5	5	5	1	1	2	1	0	0	1	3	1	1	1	1	1	2	1	0	1	1	2	1	0	0	1	3	1	1	1	1	1	2	1	0	1	1	2	1	0	0
P02795	P02795	2	2	2	Metallothionein-2	MT2A	sp|P02795|MT2_HUMAN Metallothionein-2 OS=Homo sapiens GN=MT2A PE=1 SV=1	1	2	2	2	2	1	2	2	1	1	2	1	2	2	1	1	2	0	2	0	2	1	2	2	1	1	2	1	2	2	1	1	2	0	2	0	2	1	2	2	1	1
P02808	P02808	1	1	1	Statherin	STATH	sp|P02808|STAT_HUMAN Statherin OS=Homo sapiens GN=STATH PE=1 SV=2	1	1	1	1	0	0	0	0	1	1	0	0	0	0	1	0	0	0	0	0	0	0	0	0	1	1	0	0	0	0	1	0	0	0	0	0	0	0	0	0	1	1
P03891	P03891	2	2	2	NADH-ubiquinone oxidoreductase chain 2	MT-ND2	sp|P03891|NU2M_HUMAN NADH-ubiquinone oxidoreductase chain 2 OS=Homo sapiens GN=MT-ND2 PE=1 SV=2	1	2	2	2	2	2	0	1	0	0	0	1	1	1	0	0	0	0	0	0	2	2	0	1	0	0	0	1	1	1	0	0	0	0	0	0	2	2	0	1	0	0
P03905	P03905	1	1	1	NADH-ubiquinone oxidoreductase chain 4	MT-ND4	sp|P03905|NU4M_HUMAN NADH-ubiquinone oxidoreductase chain 4 OS=Homo sapiens GN=MT-ND4 PE=1 SV=1	1	1	1	1	0	0	1	1	0	1	1	0	0	1	0	1	0	0	0	0	0	0	1	1	0	1	1	0	0	1	0	1	0	0	0	0	0	0	1	1	0	1
P03915	P03915	1	1	1	NADH-ubiquinone oxidoreductase chain 5	MT-ND5	sp|P03915|NU5M_HUMAN NADH-ubiquinone oxidoreductase chain 5 OS=Homo sapiens GN=MT-ND5 PE=1 SV=2	1	1	1	1	0	0	1	0	0	1	0	1	0	1	0	0	1	0	0	0	0	0	1	0	0	1	0	1	0	1	0	0	1	0	0	0	0	0	1	0	0	1
P04040	P04040	4	4	4	Catalase	CAT	sp|P04040|CATA_HUMAN Catalase OS=Homo sapiens GN=CAT PE=1 SV=3	1	4	4	4	1	2	1	1	1	2	1	1	3	2	3	2	4	3	3	0	1	2	1	1	1	2	1	1	3	2	3	2	4	3	3	0	1	2	1	1	1	2
P04049	P04049	4	4	4	RAF proto-oncogene serine/threonine-protein kinase	RAF1	sp|P04049|RAF1_HUMAN RAF proto-oncogene serine/threonine-protein kinase OS=Homo sapiens GN=RAF1 PE=1 SV=1	1	4	4	4	1	1	1	1	0	0	1	1	1	1	0	0	1	1	0	0	1	1	1	1	0	0	1	1	1	1	0	0	1	1	0	0	1	1	1	1	0	0
P04062	P04062	3	3	3	Glucosylceramidase	GBA	sp|P04062|GLCM_HUMAN Glucosylceramidase OS=Homo sapiens GN=GBA PE=1 SV=3	1	3	3	3	1	2	1	2	0	0	1	3	2	2	0	0	2	3	0	0	1	2	1	2	0	0	1	3	2	2	0	0	2	3	0	0	1	2	1	2	0	0
P04075	P04075	6	6	5	Fructose-bisphosphate aldolase A	ALDOA	sp|P04075|ALDOA_HUMAN Fructose-bisphosphate aldolase A OS=Homo sapiens GN=ALDOA PE=1 SV=2	1	6	6	5	5	5	5	3	4	3	5	5	4	4	1	2	4	4	2	2	5	5	5	3	4	3	5	5	4	4	1	2	4	4	2	2	4	4	4	2	3	3
P04080	P04080	1	1	1	Cystatin-B	CSTB	sp|P04080|CYTB_HUMAN Cystatin-B OS=Homo sapiens GN=CSTB PE=1 SV=2	1	1	1	1	0	0	0	0	0	0	0	0	1	0	0	0	0	0	0	0	0	0	0	0	0	0	0	0	1	0	0	0	0	0	0	0	0	0	0	0	0	0
P04083	P04083	6	6	6	Annexin A1	ANXA1	sp|P04083|ANXA1_HUMAN Annexin A1 OS=Homo sapiens GN=ANXA1 PE=1 SV=2	1	6	6	6	3	4	2	3	3	2	3	2	3	3	2	2	3	2	2	2	3	4	2	3	3	2	3	2	3	3	2	2	3	2	2	2	3	4	2	3	3	2
P04114	P04114	1	1	1	Apolipoprotein B-100;Apolipoprotein B-48	APOB	sp|P04114|APOB_HUMAN Apolipoprotein B-100 OS=Homo sapiens GN=APOB PE=1 SV=2	1	1	1	1	0	0	0	0	0	0	1	0	0	0	0	0	0	0	0	0	0	0	0	0	0	0	1	0	0	0	0	0	0	0	0	0	0	0	0	0	0	0
P04150	P04150	6	6	6	Glucocorticoid receptor	NR3C1	sp|P04150|GCR_HUMAN Glucocorticoid receptor OS=Homo sapiens GN=NR3C1 PE=1 SV=1	1	6	6	6	1	3	2	1	1	1	3	3	3	2	1	1	1	3	2	0	1	3	2	1	1	1	3	3	3	2	1	1	1	3	2	0	1	3	2	1	1	1
P04156	P04156	3	3	3	Major prion protein	PRNP	sp|P04156|PRIO_HUMAN Major prion protein OS=Homo sapiens GN=PRNP PE=1 SV=1	1	3	3	3	0	0	1	0	0	0	0	0	1	1	0	0	0	1	0	0	0	0	1	0	0	0	0	0	1	1	0	0	0	1	0	0	0	0	1	0	0	0
P04181	P04181	4	4	4	Ornithine aminotransferase, mitochondrial;Ornithine aminotransferase, hepatic form;Ornithine aminotransferase, renal form	OAT	sp|P04181|OAT_HUMAN Ornithine aminotransferase, mitochondrial OS=Homo sapiens GN=OAT PE=1 SV=1	1	4	4	4	2	3	3	3	3	3	2	3	4	4	2	3	4	3	2	0	2	3	3	3	3	3	2	3	4	4	2	3	4	3	2	0	2	3	3	3	3	3
P04406	P04406	12	12	12	Glyceraldehyde-3-phosphate dehydrogenase	GAPDH	sp|P04406|G3P_HUMAN Glyceraldehyde-3-phosphate dehydrogenase OS=Homo sapiens GN=GAPDH PE=1 SV=3	1	12	12	12	9	9	5	4	5	5	8	8	6	4	5	5	5	5	4	4	9	9	5	4	5	5	8	8	6	4	5	5	5	5	4	4	9	9	5	4	5	5
P04424	P04424	1	1	1	Argininosuccinate lyase	ASL	sp|P04424|ARLY_HUMAN Argininosuccinate lyase OS=Homo sapiens GN=ASL PE=1 SV=4	1	1	1	1	1	1	1	1	0	0	1	0	1	0	0	0	0	0	0	0	1	1	1	1	0	0	1	0	1	0	0	0	0	0	0	0	1	1	1	1	0	0
P04626	P04626	3	3	3	Receptor tyrosine-protein kinase erbB-2	ERBB2	sp|P04626|ERBB2_HUMAN Receptor tyrosine-protein kinase erbB-2 OS=Homo sapiens GN=ERBB2 PE=1 SV=1	1	3	3	3	2	1	2	2	1	1	1	0	1	1	0	2	2	0	0	1	2	1	2	2	1	1	1	0	1	1	0	2	2	0	0	1	2	1	2	2	1	1
P04632	P04632	8	8	8	Calpain small subunit 1	CAPNS1	sp|P04632|CPNS1_HUMAN Calpain small subunit 1 OS=Homo sapiens GN=CAPNS1 PE=1 SV=1	1	8	8	8	5	5	5	6	3	5	5	7	5	5	3	2	5	7	5	1	5	5	5	6	3	5	5	7	5	5	3	2	5	7	5	1	5	5	5	6	3	5
P04637	P04637	4	4	4	Cellular tumor antigen p53	TP53	sp|P04637|P53_HUMAN Cellular tumor antigen p53 OS=Homo sapiens GN=TP53 PE=1 SV=4	1	4	4	4	4	3	3	3	2	2	4	2	3	3	1	1	3	0	1	0	4	3	3	3	2	2	4	2	3	3	1	1	3	0	1	0	4	3	3	3	2	2
P04733	P04733	1	1	1	Metallothionein-1F	MT1F	sp|P04733|MT1F_HUMAN Metallothionein-1F OS=Homo sapiens GN=MT1F PE=1 SV=1	1	1	1	1	0	0	1	1	0	0	1	0	0	1	0	0	0	0	0	0	0	0	1	1	0	0	1	0	0	1	0	0	0	0	0	0	0	0	1	1	0	0
P04792	P04792	5	5	5	Heat shock protein beta-1	HSPB1	sp|P04792|HSPB1_HUMAN Heat shock protein beta-1 OS=Homo sapiens GN=HSPB1 PE=1 SV=2	1	5	5	5	4	4	4	4	3	5	5	5	5	3	2	3	4	4	2	1	4	4	4	4	3	5	5	5	5	3	2	3	4	4	2	1	4	4	4	4	3	5
P04818	P04818	3	3	3	Thymidylate synthase	TYMS	sp|P04818|TYSY_HUMAN Thymidylate synthase OS=Homo sapiens GN=TYMS PE=1 SV=3	1	3	3	3	2	2	2	1	1	1	2	3	2	2	0	1	1	2	0	0	2	2	2	1	1	1	2	3	2	2	0	1	1	2	0	0	2	2	2	1	1	1
P04843	P04843	9	9	9	Dolichyl-diphosphooligosaccharide--protein glycosyltransferase subunit 1	RPN1	sp|P04843|RPN1_HUMAN Dolichyl-diphosphooligosaccharide--protein glycosyltransferase subunit 1 OS=Homo sapiens GN=RPN1 PE=1 SV=1	1	9	9	9	3	4	5	4	2	3	5	6	5	3	2	3	2	4	2	1	3	4	5	4	2	3	5	6	5	3	2	3	2	4	2	1	3	4	5	4	2	3
P04844	P04844	11	11	11	Dolichyl-diphosphooligosaccharide--protein glycosyltransferase subunit 2	RPN2	sp|P04844|RPN2_HUMAN Dolichyl-diphosphooligosaccharide--protein glycosyltransferase subunit 2 OS=Homo sapiens GN=RPN2 PE=1 SV=3	1	11	11	11	5	4	7	7	3	5	5	8	3	4	5	6	6	9	2	5	5	4	7	7	3	5	5	8	3	4	5	6	6	9	2	5	5	4	7	7	3	5
P04899	P04899	5	4	4	Guanine nucleotide-binding protein G(i) subunit alpha-2	GNAI2	sp|P04899|GNAI2_HUMAN Guanine nucleotide-binding protein G(i) subunit alpha-2 OS=Homo sapiens GN=GNAI2 PE=1 SV=3	1	5	4	4	3	3	3	3	2	1	3	2	1	3	2	2	5	4	3	2	3	3	3	3	2	1	3	2	1	3	2	2	4	4	2	2	3	3	3	3	2	1
Q99878;Q96KK5;Q9BTM1;Q93077;Q7L7L0;P20671;P0C0S8;P04908	Q99878;Q96KK5;Q9BTM1;Q93077;Q7L7L0;P20671;P0C0S8;P04908	2;2;2;2;2;2;2;2	1;1;1;1;1;1;1;1	0;0;0;0;0;0;0;0	Histone H2A type 1-J;Histone H2A type 1-H;Histone H2A.J;Histone H2A type 1-C;Histone H2A type 3;Histone H2A type 1-D;Histone H2A type 1;Histone H2A type 1-B/E	HIST1H2AJ;HIST1H2AH;H2AFJ;HIST1H2AC;HIST3H2A;HIST1H2AD;HIST1H2AG;HIST1H2AB	sp|Q99878|H2A1J_HUMAN Histone H2A type 1-J OS=Homo sapiens GN=HIST1H2AJ PE=1 SV=3;sp|Q96KK5|H2A1H_HUMAN Histone H2A type 1-H OS=Homo sapiens GN=HIST1H2AH PE=1 SV=3;sp|Q9BTM1|H2AJ_HUMAN Histone H2A.J OS=Homo sapiens GN=H2AFJ PE=1 SV=1;sp|Q93077|H2A1C_HUMAN	8	2	1	0	2	2	1	1	1	2	0	0	1	0	1	1	1	2	1	0	1	1	0	0	0	1	0	0	0	0	0	1	0	1	0	0	0	0	0	0	0	0
P04920	P04920	5	5	5	Anion exchange protein 2	SLC4A2	sp|P04920|B3A2_HUMAN Anion exchange protein 2 OS=Homo sapiens GN=SLC4A2 PE=1 SV=4	1	5	5	5	1	0	2	3	0	0	0	0	2	1	0	0	2	0	1	0	1	0	2	3	0	0	0	0	2	1	0	0	2	0	1	0	1	0	2	3	0	0
P04921	P04921	1	1	1	Glycophorin-C	GYPC	sp|P04921|GLPC_HUMAN Glycophorin-C OS=Homo sapiens GN=GYPC PE=1 SV=1	1	1	1	1	1	1	1	1	1	1	1	1	1	1	1	1	0	0	1	0	1	1	1	1	1	1	1	1	1	1	1	1	0	0	1	0	1	1	1	1	1	1
P05023;P13637;P50993;Q13733;P20648	P05023	9;3;3;2;1	9;3;3;2;1	9;3;3;2;1	Sodium/potassium-transporting ATPase subunit alpha-1	ATP1A1	sp|P05023|AT1A1_HUMAN Sodium/potassium-transporting ATPase subunit alpha-1 OS=Homo sapiens GN=ATP1A1 PE=1 SV=1	5	9	9	9	4	3	4	5	3	3	5	3	3	5	5	4	6	6	3	2	4	3	4	5	3	3	5	3	3	5	5	4	6	6	3	2	4	3	4	5	3	3
P05026	P05026	4	4	4	Sodium/potassium-transporting ATPase subunit beta-1	ATP1B1	sp|P05026|AT1B1_HUMAN Sodium/potassium-transporting ATPase subunit beta-1 OS=Homo sapiens GN=ATP1B1 PE=1 SV=1	1	4	4	4	2	3	1	1	2	2	2	2	1	1	2	1	2	2	0	0	2	3	1	1	2	2	2	2	1	1	2	1	2	2	0	0	2	3	1	1	2	2
P05067	P05067	4	4	4	Amyloid beta A4 protein;N-APP;Soluble APP-alpha;Soluble APP-beta;C99;Beta-amyloid protein 42;Beta-amyloid protein 40;C83;P3(42);P3(40);C80;Gamma-secretase C-terminal fragment 59;Gamma-secretase C-terminal fragment 57;Gamma-secretase C-terminal fragment 50;C31	APP	sp|P05067|A4_HUMAN Amyloid beta A4 protein OS=Homo sapiens GN=APP PE=1 SV=3	1	4	4	4	2	2	2	2	1	0	2	2	1	1	1	1	2	4	1	0	2	2	2	2	1	0	2	2	1	1	1	1	2	4	1	0	2	2	2	2	1	0
P05089	P05089	1	1	1	Arginase-1	ARG1	sp|P05089|ARGI1_HUMAN Arginase-1 OS=Homo sapiens GN=ARG1 PE=1 SV=2	1	1	1	1	0	0	0	0	1	1	0	0	0	0	1	1	1	0	0	0	0	0	0	0	1	1	0	0	0	0	1	1	1	0	0	0	0	0	0	0	1	1
P05091	P05091	6	6	6	Aldehyde dehydrogenase, mitochondrial	ALDH2	sp|P05091|ALDH2_HUMAN Aldehyde dehydrogenase, mitochondrial OS=Homo sapiens GN=ALDH2 PE=1 SV=2	1	6	6	6	2	1	3	3	2	2	3	2	1	1	2	1	2	1	0	0	2	1	3	3	2	2	3	2	1	1	2	1	2	1	0	0	2	1	3	3	2	2
P05106	P05106	2	2	2	Integrin beta-3	ITGB3	sp|P05106|ITB3_HUMAN Integrin beta-3 OS=Homo sapiens GN=ITGB3 PE=1 SV=2	1	2	2	2	0	0	1	2	1	1	2	0	2	1	0	1	1	0	0	0	0	0	1	2	1	1	2	0	2	1	0	1	1	0	0	0	0	0	1	2	1	1
P05120	P05120	5	5	5	Plasminogen activator inhibitor 2	SERPINB2	sp|P05120|PAI2_HUMAN Plasminogen activator inhibitor 2 OS=Homo sapiens GN=SERPINB2 PE=1 SV=2	1	5	5	5	4	3	3	4	3	4	3	3	4	4	2	0	3	4	2	1	4	3	3	4	3	4	3	3	4	4	2	0	3	4	2	1	4	3	3	4	3	4
P05121	P05121	4	4	4	Plasminogen activator inhibitor 1	SERPINE1	sp|P05121|PAI1_HUMAN Plasminogen activator inhibitor 1 OS=Homo sapiens GN=SERPINE1 PE=1 SV=1	1	4	4	4	2	3	2	2	0	1	1	3	3	3	0	0	2	3	1	1	2	3	2	2	0	1	1	3	3	3	0	0	2	3	1	1	2	3	2	2	0	1
P05141	P05141	4	3	3	ADP/ATP translocase 2;ADP/ATP translocase 2, N-terminally processed	SLC25A5	sp|P05141|ADT2_HUMAN ADP/ATP translocase 2 OS=Homo sapiens GN=SLC25A5 PE=1 SV=7	1	4	3	3	1	1	0	0	1	1	0	1	0	0	1	2	1	2	0	1	1	1	0	0	0	1	0	1	0	0	0	1	0	2	0	1	1	1	0	0	0	1
P05161	P05161	1	1	1	Ubiquitin-like protein ISG15	ISG15	sp|P05161|ISG15_HUMAN Ubiquitin-like protein ISG15 OS=Homo sapiens GN=ISG15 PE=1 SV=5	1	1	1	1	0	0	0	0	0	0	0	1	1	1	0	0	1	1	1	0	0	0	0	0	0	0	0	1	1	1	0	0	1	1	1	0	0	0	0	0	0	0
P05165	P05165	4	4	4	Propionyl-CoA carboxylase alpha chain, mitochondrial	PCCA	sp|P05165|PCCA_HUMAN Propionyl-CoA carboxylase alpha chain, mitochondrial OS=Homo sapiens GN=PCCA PE=1 SV=4	1	4	4	4	1	0	1	2	0	0	2	0	1	0	0	0	0	1	0	0	1	0	1	2	0	0	2	0	1	0	0	0	0	1	0	0	1	0	1	2	0	0
P05166	P05166	2	2	2	Propionyl-CoA carboxylase beta chain, mitochondrial	PCCB	sp|P05166|PCCB_HUMAN Propionyl-CoA carboxylase beta chain, mitochondrial OS=Homo sapiens GN=PCCB PE=1 SV=3	1	2	2	2	0	0	0	2	0	0	1	0	1	1	0	0	0	0	1	0	0	0	0	2	0	0	1	0	1	1	0	0	0	0	1	0	0	0	0	2	0	0
P05187	P05187	2	2	2	Alkaline phosphatase, placental type	ALPP	sp|P05187|PPB1_HUMAN Alkaline phosphatase, placental type OS=Homo sapiens GN=ALPP PE=1 SV=2	1	2	2	2	0	0	1	0	0	0	0	0	1	2	0	0	1	0	0	0	0	0	1	0	0	0	0	0	1	2	0	0	1	0	0	0	0	0	1	0	0	0
P05198	P05198	6	6	6	Eukaryotic translation initiation factor 2 subunit 1	EIF2S1	sp|P05198|IF2A_HUMAN Eukaryotic translation initiation factor 2 subunit 1 OS=Homo sapiens GN=EIF2S1 PE=1 SV=3	1	6	6	6	2	2	2	2	1	1	3	2	2	1	2	2	4	2	2	0	2	2	2	2	1	1	3	2	2	1	2	2	4	2	2	0	2	2	2	2	1	1
P05230	P05230	1	1	1	Fibroblast growth factor 1	FGF1	sp|P05230|FGF1_HUMAN Fibroblast growth factor 1 OS=Homo sapiens GN=FGF1 PE=1 SV=1	1	1	1	1	0	0	0	1	0	0	1	0	1	0	0	0	0	0	0	0	0	0	0	1	0	0	1	0	1	0	0	0	0	0	0	0	0	0	0	1	0	0
P05362	P05362	1	1	1	Intercellular adhesion molecule 1	ICAM1	sp|P05362|ICAM1_HUMAN Intercellular adhesion molecule 1 OS=Homo sapiens GN=ICAM1 PE=1 SV=2	1	1	1	1	1	1	1	1	0	1	1	0	1	1	0	1	0	0	0	0	1	1	1	1	0	1	1	0	1	1	0	1	0	0	0	0	1	1	1	1	0	1
P05386	P05386	4	4	3	60S acidic ribosomal protein P1	RPLP1	sp|P05386|RLA1_HUMAN 60S acidic ribosomal protein P1 OS=Homo sapiens GN=RPLP1 PE=1 SV=1	1	4	4	3	3	3	4	3	3	3	3	3	4	3	4	3	3	2	3	1	3	3	4	3	3	3	3	3	4	3	4	3	3	2	3	1	2	2	3	2	2	2
P05387	P05387	4	3	3	60S acidic ribosomal protein P2	RPLP2	sp|P05387|RLA2_HUMAN 60S acidic ribosomal protein P2 OS=Homo sapiens GN=RPLP2 PE=1 SV=1	1	4	3	3	2	2	3	3	3	3	2	2	2	2	3	3	3	2	2	1	1	1	2	2	2	2	1	1	1	1	2	2	2	2	1	1	1	1	2	2	2	2
P05388;Q8NHW5	P05388	3;1	3;1	3;1	60S acidic ribosomal protein P0	RPLP0	sp|P05388|RLA0_HUMAN 60S acidic ribosomal protein P0 OS=Homo sapiens GN=RPLP0 PE=1 SV=1	2	3	3	3	2	2	1	1	1	1	1	1	1	1	1	1	1	1	1	1	2	2	1	1	1	1	1	1	1	1	1	1	1	1	1	1	2	2	1	1	1	1
P05412	P05412	4	4	4	Transcription factor AP-1	JUN	sp|P05412|JUN_HUMAN Transcription factor AP-1 OS=Homo sapiens GN=JUN PE=1 SV=2	1	4	4	4	2	3	1	3	1	2	2	2	2	1	0	1	0	1	0	0	2	3	1	3	1	2	2	2	2	1	0	1	0	1	0	0	2	3	1	3	1	2
P05423	P05423	1	1	1	DNA-directed RNA polymerase III subunit RPC4	POLR3D	sp|P05423|RPC4_HUMAN DNA-directed RNA polymerase III subunit RPC4 OS=Homo sapiens GN=POLR3D PE=1 SV=2	1	1	1	1	0	0	1	0	0	0	1	1	1	1	0	0	0	1	0	0	0	0	1	0	0	0	1	1	1	1	0	0	0	1	0	0	0	0	1	0	0	0
P05455	P05455	1	1	1	Lupus La protein	SSB	sp|P05455|LA_HUMAN Lupus La protein OS=Homo sapiens GN=SSB PE=1 SV=2	1	1	1	1	0	0	0	0	0	0	0	1	0	0	0	0	1	1	0	0	0	0	0	0	0	0	0	1	0	0	0	0	1	1	0	0	0	0	0	0	0	0
P05549	P05549	1	1	1	Transcription factor AP-2-alpha	TFAP2A	sp|P05549|AP2A_HUMAN Transcription factor AP-2-alpha OS=Homo sapiens GN=TFAP2A PE=1 SV=1	1	1	1	1	0	1	0	0	0	0	1	1	0	0	1	0	0	0	0	0	0	1	0	0	0	0	1	1	0	0	1	0	0	0	0	0	0	1	0	0	0	0
P05556	P05556	13	13	13	Integrin beta-1	ITGB1	sp|P05556|ITB1_HUMAN Integrin beta-1 OS=Homo sapiens GN=ITGB1 PE=1 SV=2	1	13	13	13	5	6	7	8	2	3	6	6	7	8	3	3	6	4	5	2	5	6	7	8	2	3	6	6	7	8	3	3	6	4	5	2	5	6	7	8	2	3
P05783	P05783	5	5	5	Keratin, type I cytoskeletal 18	KRT18	sp|P05783|K1C18_HUMAN Keratin, type I cytoskeletal 18 OS=Homo sapiens GN=KRT18 PE=1 SV=2	1	5	5	5	3	3	3	4	3	3	4	2	3	3	3	3	2	3	3	2	3	3	3	4	3	3	4	2	3	3	3	3	2	3	3	2	3	3	3	4	3	3
P05997	P05997	6	6	6	Collagen alpha-2(V) chain	COL5A2	sp|P05997|CO5A2_HUMAN Collagen alpha-2(V) chain OS=Homo sapiens GN=COL5A2 PE=1 SV=3	1	6	6	6	3	4	3	4	0	2	4	3	3	1	2	1	3	2	2	0	3	4	3	4	0	2	4	3	3	1	2	1	3	2	2	0	3	4	3	4	0	2
P06132	P06132	3	3	3	Uroporphyrinogen decarboxylase	UROD	sp|P06132|DCUP_HUMAN Uroporphyrinogen decarboxylase OS=Homo sapiens GN=UROD PE=1 SV=2	1	3	3	3	1	1	1	1	1	1	1	1	0	2	0	1	1	2	0	0	1	1	1	1	1	1	1	1	0	2	0	1	1	2	0	0	1	1	1	1	1	1
P06213	P06213	2	2	2	Insulin receptor;Insulin receptor subunit alpha;Insulin receptor subunit beta	INSR	sp|P06213|INSR_HUMAN Insulin receptor OS=Homo sapiens GN=INSR PE=1 SV=4	1	2	2	2	0	0	1	0	0	0	0	0	0	0	1	0	0	0	0	0	0	0	1	0	0	0	0	0	0	0	1	0	0	0	0	0	0	0	1	0	0	0
P06241	P06241	2	2	2	Tyrosine-protein kinase Fyn	FYN	sp|P06241|FYN_HUMAN Tyrosine-protein kinase Fyn OS=Homo sapiens GN=FYN PE=1 SV=3	1	2	2	2	0	1	0	0	0	0	0	1	0	0	0	0	0	0	0	0	0	1	0	0	0	0	0	1	0	0	0	0	0	0	0	0	0	1	0	0	0	0
P06280	P06280	4	4	4	Alpha-galactosidase A	GLA	sp|P06280|AGAL_HUMAN Alpha-galactosidase A OS=Homo sapiens GN=GLA PE=1 SV=1	1	4	4	4	3	2	3	2	2	4	4	1	2	4	1	3	3	2	3	0	3	2	3	2	2	4	4	1	2	4	1	3	3	2	3	0	3	2	3	2	2	4
P06396	P06396	8	5	5	Gelsolin	GSN	sp|P06396|GELS_HUMAN Gelsolin OS=Homo sapiens GN=GSN PE=1 SV=1	1	8	5	5	1	2	0	2	0	2	2	4	4	4	2	1	5	4	2	0	1	1	0	1	0	1	2	3	3	3	1	1	4	2	1	0	1	1	0	1	0	1
P06400	P06400	2	2	2	Retinoblastoma-associated protein	RB1	sp|P06400|RB_HUMAN Retinoblastoma-associated protein OS=Homo sapiens GN=RB1 PE=1 SV=2	1	2	2	2	0	0	0	0	0	0	0	0	1	2	0	1	0	0	1	0	0	0	0	0	0	0	0	0	1	2	0	1	0	0	1	0	0	0	0	0	0	0
P06454	P06454	1	1	1	Prothymosin alpha;Prothymosin alpha, N-terminally processed;Thymosin alpha-1	PTMA	sp|P06454|PTMA_HUMAN Prothymosin alpha OS=Homo sapiens GN=PTMA PE=1 SV=2	1	1	1	1	0	0	0	0	0	0	0	0	0	0	1	0	0	0	0	0	0	0	0	0	0	0	0	0	0	0	1	0	0	0	0	0	0	0	0	0	0	0
P06493	P06493	3	3	3	Cyclin-dependent kinase 1	CDK1	sp|P06493|CDK1_HUMAN Cyclin-dependent kinase 1 OS=Homo sapiens GN=CDK1 PE=1 SV=3	1	3	3	3	2	2	2	1	1	2	2	3	2	2	1	1	2	3	1	1	2	2	2	1	1	2	2	3	2	2	1	1	2	3	1	1	2	2	2	1	1	2
P06576	P06576	13	13	13	ATP synthase subunit beta, mitochondrial	ATP5B	sp|P06576|ATPB_HUMAN ATP synthase subunit beta, mitochondrial OS=Homo sapiens GN=ATP5B PE=1 SV=3	1	13	13	13	6	6	7	8	6	7	8	7	8	7	9	9	9	8	6	6	6	6	7	8	6	7	8	7	8	7	9	9	9	8	6	6	6	6	7	8	6	7
P06703	P06703	1	1	1	Protein S100-A6	S100A6	sp|P06703|S10A6_HUMAN Protein S100-A6 OS=Homo sapiens GN=S100A6 PE=1 SV=1	1	1	1	1	0	0	0	0	0	0	0	0	0	0	0	0	1	0	0	0	0	0	0	0	0	0	0	0	0	0	0	0	1	0	0	0	0	0	0	0	0	0
P06730	P06730	3	3	3	Eukaryotic translation initiation factor 4E	EIF4E	sp|P06730|IF4E_HUMAN Eukaryotic translation initiation factor 4E OS=Homo sapiens GN=EIF4E PE=1 SV=2	1	3	3	3	1	1	1	1	1	1	0	0	1	1	1	2	2	1	1	0	1	1	1	1	1	1	0	0	1	1	1	2	2	1	1	0	1	1	1	1	1	1
P06733;P13929	P06733	10;1	10;1	9;0	Alpha-enolase	ENO1	sp|P06733|ENOA_HUMAN Alpha-enolase OS=Homo sapiens GN=ENO1 PE=1 SV=2	2	10	10	9	6	6	5	5	6	7	6	5	7	6	4	6	7	6	4	3	6	6	5	5	6	7	6	5	7	6	4	6	7	6	4	3	5	5	4	4	5	6
P06737	P06737	3	2	2	Glycogen phosphorylase, liver form	PYGL	sp|P06737|PYGL_HUMAN Glycogen phosphorylase, liver form OS=Homo sapiens GN=PYGL PE=1 SV=4	1	3	2	2	3	3	2	3	2	1	3	3	3	3	1	1	3	2	2	1	2	2	2	2	2	1	2	2	2	2	1	1	2	1	2	1	2	2	2	2	2	1
P06744	P06744	6	6	4	Glucose-6-phosphate isomerase	GPI	sp|P06744|G6PI_HUMAN Glucose-6-phosphate isomerase OS=Homo sapiens GN=GPI PE=1 SV=4	1	6	6	4	2	3	2	1	1	1	3	5	3	3	1	1	3	3	1	1	2	3	2	1	1	1	3	5	3	3	1	1	3	3	1	1	1	2	1	0	0	0
P06746	P06746	1	1	1	DNA polymerase beta	POLB	sp|P06746|DPOLB_HUMAN DNA polymerase beta OS=Homo sapiens GN=POLB PE=1 SV=3	1	1	1	1	1	1	0	0	0	0	0	0	1	0	0	0	0	0	0	0	1	1	0	0	0	0	0	0	1	0	0	0	0	0	0	0	1	1	0	0	0	0
P06748	P06748	12	12	12	Nucleophosmin	NPM1	sp|P06748|NPM_HUMAN Nucleophosmin OS=Homo sapiens GN=NPM1 PE=1 SV=2	1	12	12	12	7	7	6	6	6	5	8	5	6	6	6	6	5	4	5	2	7	7	6	6	6	5	8	5	6	6	6	6	5	4	5	2	7	7	6	6	6	5
P06756	P06756	5	5	5	Integrin alpha-V;Integrin alpha-V heavy chain;Integrin alpha-V light chain	ITGAV	sp|P06756|ITAV_HUMAN Integrin alpha-V OS=Homo sapiens GN=ITGAV PE=1 SV=2	1	5	5	5	3	3	5	4	1	2	2	2	1	1	0	1	1	0	0	0	3	3	5	4	1	2	2	2	1	1	0	1	1	0	0	0	3	3	5	4	1	2
Q16778;P33778;P23527;P06899;Q8N257;Q6DRA6;Q6DN03	Q16778;P33778;P23527;P06899;Q8N257	3;3;3;3;2;1;1	1;1;1;1;1;1;1	1;1;1;1;1;1;1	Histone H2B type 2-E;Histone H2B type 1-B;Histone H2B type 1-O;Histone H2B type 1-J;Histone H2B type 3-B	HIST2H2BE;HIST1H2BB;HIST1H2BO;HIST1H2BJ;HIST3H2BB	sp|Q16778|H2B2E_HUMAN Histone H2B type 2-E OS=Homo sapiens GN=HIST2H2BE PE=1 SV=3;sp|P33778|H2B1B_HUMAN Histone H2B type 1-B OS=Homo sapiens GN=HIST1H2BB PE=1 SV=2;sp|P23527|H2B1O_HUMAN Histone H2B type 1-O OS=Homo sapiens GN=HIST1H2BO PE=1 SV=3;sp|P06899|	7	3	1	1	1	2	2	2	1	1	2	1	2	2	1	1	0	0	0	1	0	0	0	0	0	0	0	0	0	0	0	0	0	0	0	1	0	0	0	0	0	0
P07099	P07099	8	8	8	Epoxide hydrolase 1	EPHX1	sp|P07099|HYEP_HUMAN Epoxide hydrolase 1 OS=Homo sapiens GN=EPHX1 PE=1 SV=1	1	8	8	8	3	2	2	3	0	0	4	6	3	3	1	1	1	2	1	1	3	2	2	3	0	0	4	6	3	3	1	1	1	2	1	1	3	2	2	3	0	0
P07195	P07195	3	3	3	L-lactate dehydrogenase B chain	LDHB	sp|P07195|LDHB_HUMAN L-lactate dehydrogenase B chain OS=Homo sapiens GN=LDHB PE=1 SV=2	1	3	3	3	0	1	1	0	0	1	1	1	3	3	0	1	1	2	2	0	0	1	1	0	0	1	1	1	3	3	0	1	1	2	2	0	0	1	1	0	0	1
P07199	P07199	1	1	1	Major centromere autoantigen B	CENPB	sp|P07199|CENPB_HUMAN Major centromere autoantigen B OS=Homo sapiens GN=CENPB PE=1 SV=2	1	1	1	1	1	1	1	1	0	0	0	0	1	1	1	1	1	0	1	0	1	1	1	1	0	0	0	0	1	1	1	1	1	0	1	0	1	1	1	1	0	0
P07203	P07203	2	2	2	Glutathione peroxidase 1	GPX1	sp|P07203|GPX1_HUMAN Glutathione peroxidase 1 OS=Homo sapiens GN=GPX1 PE=1 SV=4	1	2	2	2	1	2	2	2	1	0	1	1	2	2	2	0	1	1	1	0	1	2	2	2	1	0	1	1	2	2	2	0	1	1	1	0	1	2	2	2	1	0
P07237	P07237	5	5	5	Protein disulfide-isomerase	P4HB	sp|P07237|PDIA1_HUMAN Protein disulfide-isomerase OS=Homo sapiens GN=P4HB PE=1 SV=3	1	5	5	5	4	4	4	4	2	3	3	5	3	2	2	3	2	4	1	0	4	4	4	4	2	3	3	5	3	2	2	3	2	4	1	0	4	4	4	4	2	3
P07339	P07339	2	2	2	Cathepsin D;Cathepsin D light chain;Cathepsin D heavy chain	CTSD	sp|P07339|CATD_HUMAN Cathepsin D OS=Homo sapiens GN=CTSD PE=1 SV=1	1	2	2	2	1	1	1	1	2	2	1	2	1	1	1	1	2	1	1	1	1	1	1	1	2	2	1	2	1	1	1	1	2	1	1	1	1	1	1	1	2	2
P07355;A6NMY6	P07355;A6NMY6	12;7	12;7	12;7	Annexin A2;Putative annexin A2-like protein	ANXA2;ANXA2P2	sp|P07355|ANXA2_HUMAN Annexin A2 OS=Homo sapiens GN=ANXA2 PE=1 SV=2;sp|A6NMY6|AXA2L_HUMAN Putative annexin A2-like protein OS=Homo sapiens GN=ANXA2P2 PE=5 SV=2	2	12	12	12	8	8	8	8	8	8	8	7	4	3	6	7	5	5	3	1	8	8	8	8	8	8	8	7	4	3	6	7	5	5	3	1	8	8	8	8	8	8
P07384	P07384	9	9	9	Calpain-1 catalytic subunit	CAPN1	sp|P07384|CAN1_HUMAN Calpain-1 catalytic subunit OS=Homo sapiens GN=CAPN1 PE=1 SV=1	1	9	9	9	5	5	2	4	3	5	4	4	5	3	2	3	4	4	3	0	5	5	2	4	3	5	4	4	5	3	2	3	4	4	3	0	5	5	2	4	3	5
P07437	P07437	14	14	4	Tubulin beta chain	TUBB	sp|P07437|TBB5_HUMAN Tubulin beta chain OS=Homo sapiens GN=TUBB PE=1 SV=2	1	14	14	4	10	8	5	5	7	7	8	8	5	7	6	6	5	7	5	4	10	8	5	5	7	7	8	8	5	7	6	6	5	7	5	4	2	2	1	1	2	3
P07602	P07602	3	3	3	Prosaposin;Saposin-A;Saposin-B-Val;Saposin-B;Saposin-C;Saposin-D	PSAP	sp|P07602|SAP_HUMAN Prosaposin OS=Homo sapiens GN=PSAP PE=1 SV=2	1	3	3	3	0	0	0	2	1	1	2	1	0	1	1	1	0	1	0	0	0	0	0	2	1	1	2	1	0	1	1	1	0	1	0	0	0	0	0	2	1	1
P07686	P07686	4	4	4	Beta-hexosaminidase subunit beta;Beta-hexosaminidase subunit beta chain B;Beta-hexosaminidase subunit beta chain A	HEXB	sp|P07686|HEXB_HUMAN Beta-hexosaminidase subunit beta OS=Homo sapiens GN=HEXB PE=1 SV=3	1	4	4	4	1	2	1	1	2	1	2	3	2	2	1	2	3	3	1	0	1	2	1	1	2	1	2	3	2	2	1	2	3	3	1	0	1	2	1	1	2	1
P07737;CON__P02584	P07737	3;1	3;1	3;1	Profilin-1	PFN1	sp|P07737|PROF1_HUMAN Profilin-1 OS=Homo sapiens GN=PFN1 PE=1 SV=2	2	3	3	3	1	2	0	0	2	3	2	1	1	2	2	2	2	1	0	0	1	2	0	0	2	3	2	1	1	2	2	2	2	1	0	0	1	2	0	0	2	3
P07741	P07741	2	2	2	Adenine phosphoribosyltransferase	APRT	sp|P07741|APT_HUMAN Adenine phosphoribosyltransferase OS=Homo sapiens GN=APRT PE=1 SV=2	1	2	2	2	0	1	1	2	1	1	2	2	2	2	0	1	1	2	1	1	0	1	1	2	1	1	2	2	2	2	0	1	1	2	1	1	0	1	1	2	1	1
P07814	P07814	22	22	22	Bifunctional glutamate/proline--tRNA ligase;Glutamate--tRNA ligase;Proline--tRNA ligase	EPRS	sp|P07814|SYEP_HUMAN Bifunctional glutamate/proline--tRNA ligase OS=Homo sapiens GN=EPRS PE=1 SV=5	1	22	22	22	12	12	9	9	5	4	15	12	12	11	5	6	10	9	6	4	12	12	9	9	5	4	15	12	12	11	5	6	10	9	6	4	12	12	9	9	5	4
P07858	P07858	2	2	2	Cathepsin B;Cathepsin B light chain;Cathepsin B heavy chain	CTSB	sp|P07858|CATB_HUMAN Cathepsin B OS=Homo sapiens GN=CTSB PE=1 SV=3	1	2	2	2	0	0	1	1	0	1	1	1	1	1	0	1	1	1	1	0	0	0	1	1	0	1	1	1	1	1	0	1	1	1	1	0	0	0	1	1	0	1
P07900;Q14568;Q58FG0	P07900	21;3;2	21;3;2	14;1;1	Heat shock protein HSP 90-alpha	HSP90AA1	sp|P07900|HS90A_HUMAN Heat shock protein HSP 90-alpha OS=Homo sapiens GN=HSP90AA1 PE=1 SV=5	3	21	21	14	15	16	13	13	12	12	15	10	15	13	9	12	10	8	8	4	15	16	13	13	12	12	15	10	15	13	9	12	10	8	8	4	11	11	9	9	8	8
P07902	P07902	1	1	1	Galactose-1-phosphate uridylyltransferase	GALT	sp|P07902|GALT_HUMAN Galactose-1-phosphate uridylyltransferase OS=Homo sapiens GN=GALT PE=1 SV=3	1	1	1	1	0	0	0	0	0	0	0	0	0	1	0	0	0	0	0	0	0	0	0	0	0	0	0	0	0	1	0	0	0	0	0	0	0	0	0	0	0	0
P07910	P07910	5	5	5	Heterogeneous nuclear ribonucleoproteins C1/C2	HNRNPC	sp|P07910|HNRPC_HUMAN Heterogeneous nuclear ribonucleoproteins C1/C2 OS=Homo sapiens GN=HNRNPC PE=1 SV=4	1	5	5	5	3	3	3	3	3	2	4	1	2	3	2	2	2	1	2	0	3	3	3	3	3	2	4	1	2	3	2	2	2	1	2	0	3	3	3	3	3	2
P07919;A0A096LP55	P07919;A0A096LP55	2;1	2;1	2;1	Cytochrome b-c1 complex subunit 6, mitochondrial;Cytochrome b-c1 complex subunit 6	UQCRH;UQCRHL	sp|P07919|QCR6_HUMAN Cytochrome b-c1 complex subunit 6, mitochondrial OS=Homo sapiens GN=UQCRH PE=1 SV=2;sp|A0A096LP55|QCR6L_HUMAN Cytochrome b-c1 complex subunit 6-like, mitochondrial OS=Homo sapiens GN=UQCRHL PE=3 SV=1	2	2	2	2	0	1	0	1	0	0	1	1	1	0	0	0	1	1	1	0	0	1	0	1	0	0	1	1	1	0	0	0	1	1	1	0	0	1	0	1	0	0
P07942	P07942	16	16	16	Laminin subunit beta-1	LAMB1	sp|P07942|LAMB1_HUMAN Laminin subunit beta-1 OS=Homo sapiens GN=LAMB1 PE=1 SV=2	1	16	16	16	6	6	7	7	3	2	5	7	6	4	2	6	4	3	5	0	6	6	7	7	3	2	5	7	6	4	2	6	4	3	5	0	6	6	7	7	3	2
P07947	P07947	4	4	4	Tyrosine-protein kinase Yes	YES1	sp|P07947|YES_HUMAN Tyrosine-protein kinase Yes OS=Homo sapiens GN=YES1 PE=1 SV=3	1	4	4	4	2	2	1	2	1	1	1	2	2	1	1	1	3	0	1	1	2	2	1	2	1	1	1	2	2	1	1	1	3	0	1	1	2	2	1	2	1	1
P07948	P07948	3	3	3	Tyrosine-protein kinase Lyn	LYN	sp|P07948|LYN_HUMAN Tyrosine-protein kinase Lyn OS=Homo sapiens GN=LYN PE=1 SV=3	1	3	3	3	2	1	3	3	1	2	2	2	2	1	2	2	1	2	2	0	2	1	3	3	1	2	2	2	2	1	2	2	1	2	2	0	2	1	3	3	1	2
P07954	P07954	5	5	5	Fumarate hydratase, mitochondrial	FH	sp|P07954|FUMH_HUMAN Fumarate hydratase, mitochondrial OS=Homo sapiens GN=FH PE=1 SV=3	1	5	5	5	3	4	4	4	2	2	3	4	3	3	2	2	3	3	1	1	3	4	4	4	2	2	3	4	3	3	2	2	3	3	1	1	3	4	4	4	2	2
P07992	P07992	1	1	1	DNA excision repair protein ERCC-1	ERCC1	sp|P07992|ERCC1_HUMAN DNA excision repair protein ERCC-1 OS=Homo sapiens GN=ERCC1 PE=1 SV=1	1	1	1	1	0	0	0	0	0	0	1	0	0	0	0	0	0	1	0	0	0	0	0	0	0	0	1	0	0	0	0	0	0	1	0	0	0	0	0	0	0	0
P07996	P07996	11	11	2	Thrombospondin-1	THBS1	sp|P07996|TSP1_HUMAN Thrombospondin-1 OS=Homo sapiens GN=THBS1 PE=1 SV=2	1	11	11	2	5	5	6	6	4	5	7	3	6	6	3	3	5	2	6	0	5	5	6	6	4	5	7	3	6	6	3	3	5	2	6	0	1	0	2	2	1	1
P08047	P08047	3	3	3	Transcription factor Sp1	SP1	sp|P08047|SP1_HUMAN Transcription factor Sp1 OS=Homo sapiens GN=SP1 PE=1 SV=3	1	3	3	3	1	1	0	1	1	1	1	2	0	0	1	2	1	0	0	0	1	1	0	1	1	1	1	2	0	0	1	2	1	0	0	0	1	1	0	1	1	1
P08048;P17010	P08048;P17010	1;1	1;1	1;1	Zinc finger Y-chromosomal protein;Zinc finger X-chromosomal protein	ZFY;ZFX	sp|P08048|ZFY_HUMAN Zinc finger Y-chromosomal protein OS=Homo sapiens GN=ZFY PE=1 SV=3;sp|P17010|ZFX_HUMAN Zinc finger X-chromosomal protein OS=Homo sapiens GN=ZFX PE=2 SV=2	2	1	1	1	0	0	1	1	0	0	1	0	1	1	1	1	1	0	1	0	0	0	1	1	0	0	1	0	1	1	1	1	1	0	1	0	0	0	1	1	0	0
P08133	P08133	6	6	6	Annexin A6	ANXA6	sp|P08133|ANXA6_HUMAN Annexin A6 OS=Homo sapiens GN=ANXA6 PE=1 SV=3	1	6	6	6	5	4	4	5	5	5	6	5	4	5	5	5	5	5	4	3	5	4	4	5	5	5	6	5	4	5	5	5	5	5	4	3	5	4	4	5	5	5
P08134	P08134	3	1	1	Rho-related GTP-binding protein RhoC	RHOC	sp|P08134|RHOC_HUMAN Rho-related GTP-binding protein RhoC OS=Homo sapiens GN=RHOC PE=1 SV=1	1	3	1	1	3	2	3	2	1	1	3	3	2	3	2	3	3	3	1	2	1	1	1	1	1	1	1	1	1	1	1	1	1	1	1	0	1	1	1	1	1	1
P08174	P08174	4	4	4	Complement decay-accelerating factor	CD55	sp|P08174|DAF_HUMAN Complement decay-accelerating factor OS=Homo sapiens GN=CD55 PE=1 SV=4	1	4	4	4	3	3	3	3	1	1	4	3	2	1	3	2	3	3	1	0	3	3	3	3	1	1	4	3	2	1	3	2	3	3	1	0	3	3	3	3	1	1
P08195	P08195	6	6	6	4F2 cell-surface antigen heavy chain	SLC3A2	sp|P08195|4F2_HUMAN 4F2 cell-surface antigen heavy chain OS=Homo sapiens GN=SLC3A2 PE=1 SV=3	1	6	6	6	3	4	4	4	3	2	4	5	3	3	3	3	2	2	1	2	3	4	4	4	3	2	4	5	3	3	3	3	2	2	1	2	3	4	4	4	3	2
P08236	P08236	1	1	1	Beta-glucuronidase	GUSB	sp|P08236|BGLR_HUMAN Beta-glucuronidase OS=Homo sapiens GN=GUSB PE=1 SV=2	1	1	1	1	0	0	1	1	0	0	0	0	0	1	0	0	0	0	0	0	0	0	1	1	0	0	0	0	0	1	0	0	0	0	0	0	0	0	1	1	0	0
P08237	P08237	7	7	7	ATP-dependent 6-phosphofructokinase, muscle type	PFKM	sp|P08237|PFKAM_HUMAN ATP-dependent 6-phosphofructokinase, muscle type OS=Homo sapiens GN=PFKM PE=1 SV=2	1	7	7	7	2	2	2	3	2	2	5	6	3	3	2	1	4	3	2	0	2	2	2	3	2	2	5	6	3	3	2	1	4	3	2	0	2	2	2	3	2	2
P08238	P08238	20	13	13	Heat shock protein HSP 90-beta	HSP90AB1	sp|P08238|HS90B_HUMAN Heat shock protein HSP 90-beta OS=Homo sapiens GN=HSP90AB1 PE=1 SV=4	1	20	13	13	14	16	13	13	11	12	15	11	14	14	11	11	12	11	9	8	10	11	9	9	7	8	9	9	9	10	8	7	9	9	7	7	10	11	9	9	7	8
P08240	P08240	2	2	2	Signal recognition particle receptor subunit alpha	SRPR	sp|P08240|SRPR_HUMAN Signal recognition particle receptor subunit alpha OS=Homo sapiens GN=SRPR PE=1 SV=2	1	2	2	2	0	0	1	1	0	0	1	1	1	1	1	0	1	0	0	0	0	0	1	1	0	0	1	1	1	1	1	0	1	0	0	0	0	0	1	1	0	0
P08243	P08243	4	4	4	Asparagine synthetase [glutamine-hydrolyzing]	ASNS	sp|P08243|ASNS_HUMAN Asparagine synthetase [glutamine-hydrolyzing] OS=Homo sapiens GN=ASNS PE=1 SV=4	1	4	4	4	1	1	1	1	0	0	2	1	1	1	0	0	3	2	0	0	1	1	1	1	0	0	2	1	1	1	0	0	3	2	0	0	1	1	1	1	0	0
P08473	P08473	4	4	4	Neprilysin	MME	sp|P08473|NEP_HUMAN Neprilysin OS=Homo sapiens GN=MME PE=1 SV=2	1	4	4	4	3	3	2	3	1	1	3	3	1	2	1	2	2	3	1	2	3	3	2	3	1	1	3	3	1	2	1	2	2	3	1	2	3	3	2	3	1	1
P08559	P08559	4	4	4	Pyruvate dehydrogenase E1 component subunit alpha, somatic form, mitochondrial	PDHA1	sp|P08559|ODPA_HUMAN Pyruvate dehydrogenase E1 component subunit alpha, somatic form, mitochondrial OS=Homo sapiens GN=PDHA1 PE=1 SV=3	1	4	4	4	1	2	3	2	1	1	1	3	1	1	1	1	1	3	1	0	1	2	3	2	1	1	1	3	1	1	1	1	1	3	1	0	1	2	3	2	1	1
P08572	P08572	2	2	2	Collagen alpha-2(IV) chain;Canstatin	COL4A2	sp|P08572|CO4A2_HUMAN Collagen alpha-2(IV) chain OS=Homo sapiens GN=COL4A2 PE=1 SV=4	1	2	2	2	1	2	0	1	0	0	2	0	1	1	0	0	0	0	0	0	1	2	0	1	0	0	2	0	1	1	0	0	0	0	0	0	1	2	0	1	0	0
P08574	P08574	4	4	4	Cytochrome c1, heme protein, mitochondrial	CYC1	sp|P08574|CY1_HUMAN Cytochrome c1, heme protein, mitochondrial OS=Homo sapiens GN=CYC1 PE=1 SV=3	1	4	4	4	4	3	4	3	3	3	4	3	4	3	3	4	4	4	3	2	4	3	4	3	3	3	4	3	4	3	3	4	4	4	3	2	4	3	4	3	3	3
P08579	P08579	1	1	1	U2 small nuclear ribonucleoprotein B	SNRPB2	sp|P08579|RU2B_HUMAN U2 small nuclear ribonucleoprotein B OS=Homo sapiens GN=SNRPB2 PE=1 SV=1	1	1	1	1	0	0	0	0	0	0	0	1	0	0	0	0	0	0	0	0	0	0	0	0	0	0	0	1	0	0	0	0	0	0	0	0	0	0	0	0	0	0
P08581	P08581	9	9	9	Hepatocyte growth factor receptor	MET	sp|P08581|MET_HUMAN Hepatocyte growth factor receptor OS=Homo sapiens GN=MET PE=1 SV=4	1	9	9	9	1	2	3	2	1	2	4	2	2	3	1	1	2	1	3	1	1	2	3	2	1	2	4	2	2	3	1	1	2	1	3	1	1	2	3	2	1	2
P08603	P08603	1	1	1	Complement factor H	CFH	sp|P08603|CFAH_HUMAN Complement factor H OS=Homo sapiens GN=CFH PE=1 SV=4	1	1	1	1	1	1	1	1	1	1	1	1	1	1	1	1	0	1	1	0	1	1	1	1	1	1	1	1	1	1	1	1	0	1	1	0	1	1	1	1	1	1
P08621	P08621	4	4	4	U1 small nuclear ribonucleoprotein 70 kDa	SNRNP70	sp|P08621|RU17_HUMAN U1 small nuclear ribonucleoprotein 70 kDa OS=Homo sapiens GN=SNRNP70 PE=1 SV=2	1	4	4	4	1	1	1	1	1	1	1	2	3	3	1	1	1	2	1	0	1	1	1	1	1	1	1	2	3	3	1	1	1	2	1	0	1	1	1	1	1	1
P08648	P08648	8	8	8	Integrin alpha-5;Integrin alpha-5 heavy chain;Integrin alpha-5 light chain	ITGA5	sp|P08648|ITA5_HUMAN Integrin alpha-5 OS=Homo sapiens GN=ITGA5 PE=1 SV=2	1	8	8	8	7	8	6	6	2	4	7	5	6	6	1	3	5	4	2	2	7	8	6	6	2	4	7	5	6	6	1	3	5	4	2	2	7	8	6	6	2	4
P08651	P08651	1	1	1	Nuclear factor 1 C-type	NFIC	sp|P08651|NFIC_HUMAN Nuclear factor 1 C-type OS=Homo sapiens GN=NFIC PE=1 SV=2	1	1	1	1	1	1	1	1	0	0	1	1	1	0	0	0	1	1	1	0	1	1	1	1	0	0	1	1	1	0	0	0	1	1	1	0	1	1	1	1	0	0
P08670	P08670	17	17	17	Vimentin	VIM	sp|P08670|VIME_HUMAN Vimentin OS=Homo sapiens GN=VIM PE=1 SV=4	1	17	17	17	10	9	8	10	9	9	13	9	10	10	10	9	9	6	9	4	10	9	8	10	9	9	13	9	10	10	10	9	9	6	9	4	10	9	8	10	9	9
P08708	P08708	3	3	3	40S ribosomal protein S17	RPS17	sp|P08708|RS17_HUMAN 40S ribosomal protein S17 OS=Homo sapiens GN=RPS17 PE=1 SV=2	1	3	3	3	3	3	3	3	3	3	3	3	3	3	3	3	3	2	3	2	3	3	3	3	3	3	3	3	3	3	3	3	3	2	3	2	3	3	3	3	3	3
P08754	P08754	6	6	4	Guanine nucleotide-binding protein G(k) subunit alpha	GNAI3	sp|P08754|GNAI3_HUMAN Guanine nucleotide-binding protein G(k) subunit alpha OS=Homo sapiens GN=GNAI3 PE=1 SV=3	1	6	6	4	3	4	3	3	3	3	4	2	3	3	2	3	5	4	5	1	3	4	3	3	3	3	4	2	3	3	2	3	5	4	5	1	3	4	3	3	3	3
P08758	P08758	4	4	4	Annexin A5	ANXA5	sp|P08758|ANXA5_HUMAN Annexin A5 OS=Homo sapiens GN=ANXA5 PE=1 SV=2	1	4	4	4	3	3	3	2	2	2	3	3	3	3	2	2	3	4	2	0	3	3	3	2	2	2	3	3	3	3	2	2	3	4	2	0	3	3	3	2	2	2
P08842	P08842	2	2	2	Steryl-sulfatase	STS	sp|P08842|STS_HUMAN Steryl-sulfatase OS=Homo sapiens GN=STS PE=1 SV=2	1	2	2	2	1	0	0	0	0	0	0	0	0	0	0	0	1	0	1	0	1	0	0	0	0	0	0	0	0	0	0	0	1	0	1	0	1	0	0	0	0	0
P08865	P08865	3	3	3	40S ribosomal protein SA	RPSA	sp|P08865|RSSA_HUMAN 40S ribosomal protein SA OS=Homo sapiens GN=RPSA PE=1 SV=4	1	3	3	3	2	3	2	2	2	2	3	3	2	3	2	2	3	3	3	1	2	3	2	2	2	2	3	3	2	3	2	2	3	3	3	1	2	3	2	2	2	2
P08908	P08908	1	1	1	5-hydroxytryptamine receptor 1A	HTR1A	sp|P08908|5HT1A_HUMAN 5-hydroxytryptamine receptor 1A OS=Homo sapiens GN=HTR1A PE=1 SV=3	1	1	1	1	0	0	0	0	0	0	0	0	0	1	0	0	0	0	0	0	0	0	0	0	0	0	0	0	0	1	0	0	0	0	0	0	0	0	0	0	0	0
P08962	P08962	3	3	3	CD63 antigen	CD63	sp|P08962|CD63_HUMAN CD63 antigen OS=Homo sapiens GN=CD63 PE=1 SV=2	1	3	3	3	1	1	0	0	0	0	2	1	2	1	0	0	1	0	0	0	1	1	0	0	0	0	2	1	2	1	0	0	1	0	0	0	1	1	0	0	0	0
P09001	P09001	3	3	3	39S ribosomal protein L3, mitochondrial	MRPL3	sp|P09001|RM03_HUMAN 39S ribosomal protein L3, mitochondrial OS=Homo sapiens GN=MRPL3 PE=1 SV=1	1	3	3	3	0	1	1	1	1	1	1	3	0	1	1	1	1	1	1	0	0	1	1	1	1	1	1	3	0	1	1	1	1	1	1	0	0	1	1	1	1	1
P09012	P09012	2	2	2	U1 small nuclear ribonucleoprotein A	SNRPA	sp|P09012|SNRPA_HUMAN U1 small nuclear ribonucleoprotein A OS=Homo sapiens GN=SNRPA PE=1 SV=3	1	2	2	2	1	1	1	1	0	0	1	2	1	1	0	0	1	1	0	0	1	1	1	1	0	0	1	2	1	1	0	0	1	1	0	0	1	1	1	1	0	0
P09038	P09038	1	1	1	Fibroblast growth factor 2	FGF2	sp|P09038|FGF2_HUMAN Fibroblast growth factor 2 OS=Homo sapiens GN=FGF2 PE=1 SV=3	1	1	1	1	0	0	1	0	0	0	1	0	0	0	0	1	0	0	0	0	0	0	1	0	0	0	1	0	0	0	0	1	0	0	0	0	0	0	1	0	0	0
P09104	P09104	4	3	3	Gamma-enolase	ENO2	sp|P09104|ENOG_HUMAN Gamma-enolase OS=Homo sapiens GN=ENO2 PE=1 SV=3	1	4	3	3	2	2	2	2	2	2	3	3	3	2	2	2	2	2	2	2	1	1	1	1	1	1	2	2	2	1	1	1	1	1	1	1	1	1	1	1	1	1
P09110	P09110	3	3	3	3-ketoacyl-CoA thiolase, peroxisomal	ACAA1	sp|P09110|THIK_HUMAN 3-ketoacyl-CoA thiolase, peroxisomal OS=Homo sapiens GN=ACAA1 PE=1 SV=2	1	3	3	3	0	0	1	0	0	0	2	1	0	0	0	1	2	2	1	0	0	0	1	0	0	0	2	1	0	0	0	1	2	2	1	0	0	0	1	0	0	0
P09132	P09132	1	1	1	Signal recognition particle 19 kDa protein	SRP19	sp|P09132|SRP19_HUMAN Signal recognition particle 19 kDa protein OS=Homo sapiens GN=SRP19 PE=1 SV=3	1	1	1	1	0	0	0	0	0	0	0	0	0	1	0	0	0	0	0	0	0	0	0	0	0	0	0	0	0	1	0	0	0	0	0	0	0	0	0	0	0	0
P09211	P09211	2	2	2	Glutathione S-transferase P	GSTP1	sp|P09211|GSTP1_HUMAN Glutathione S-transferase P OS=Homo sapiens GN=GSTP1 PE=1 SV=2	1	2	2	2	1	1	1	1	1	1	1	2	1	1	1	1	1	1	1	1	1	1	1	1	1	1	1	2	1	1	1	1	1	1	1	1	1	1	1	1	1	1
P09234	P09234	1	1	1	U1 small nuclear ribonucleoprotein C	SNRPC	sp|P09234|RU1C_HUMAN U1 small nuclear ribonucleoprotein C OS=Homo sapiens GN=SNRPC PE=1 SV=1	1	1	1	1	1	1	1	1	0	0	1	1	1	1	1	0	1	0	1	1	1	1	1	1	0	0	1	1	1	1	1	0	1	0	1	1	1	1	1	1	0	0
P09382	P09382	4	4	4	Galectin-1	LGALS1	sp|P09382|LEG1_HUMAN Galectin-1 OS=Homo sapiens GN=LGALS1 PE=1 SV=2	1	4	4	4	1	1	1	1	1	1	2	3	2	0	0	1	1	2	1	0	1	1	1	1	1	1	2	3	2	0	0	1	1	2	1	0	1	1	1	1	1	1
P09417	P09417	3	3	3	Dihydropteridine reductase	QDPR	sp|P09417|DHPR_HUMAN Dihydropteridine reductase OS=Homo sapiens GN=QDPR PE=1 SV=2	1	3	3	3	2	1	1	2	1	1	2	2	2	2	0	0	2	3	2	0	2	1	1	2	1	1	2	2	2	2	0	0	2	3	2	0	2	1	1	2	1	1
P09429	P09429	5	5	3	High mobility group protein B1	HMGB1	sp|P09429|HMGB1_HUMAN High mobility group protein B1 OS=Homo sapiens GN=HMGB1 PE=1 SV=3	1	5	5	3	3	3	3	3	1	1	2	0	2	3	1	1	3	0	1	0	3	3	3	3	1	1	2	0	2	3	1	1	3	0	1	0	2	1	2	2	1	1
P09486	P09486	2	2	2	SPARC	SPARC	sp|P09486|SPRC_HUMAN SPARC OS=Homo sapiens GN=SPARC PE=1 SV=1	1	2	2	2	0	0	1	1	0	1	1	1	0	0	1	1	2	1	1	0	0	0	1	1	0	1	1	1	0	0	1	1	2	1	1	0	0	0	1	1	0	1
P09525	P09525	1	1	1	Annexin A4	ANXA4	sp|P09525|ANXA4_HUMAN Annexin A4 OS=Homo sapiens GN=ANXA4 PE=1 SV=4	1	1	1	1	1	1	1	1	1	1	1	1	1	1	1	1	1	1	1	0	1	1	1	1	1	1	1	1	1	1	1	1	1	1	1	0	1	1	1	1	1	1
P09543	P09543	2	2	2	2,3-cyclic-nucleotide 3-phosphodiesterase	CNP	sp|P09543|CN37_HUMAN 2,3-cyclic-nucleotide 3-phosphodiesterase OS=Homo sapiens GN=CNP PE=1 SV=2	1	2	2	2	2	2	1	2	0	1	1	2	1	1	0	1	2	2	1	0	2	2	1	2	0	1	1	2	1	1	0	1	2	2	1	0	2	2	1	2	0	1
P09601	P09601	1	1	1	Heme oxygenase 1	HMOX1	sp|P09601|HMOX1_HUMAN Heme oxygenase 1 OS=Homo sapiens GN=HMOX1 PE=1 SV=1	1	1	1	1	1	1	1	1	1	1	1	1	1	1	1	1	1	1	1	0	1	1	1	1	1	1	1	1	1	1	1	1	1	1	1	0	1	1	1	1	1	1
P09622	P09622	2	2	2	Dihydrolipoyl dehydrogenase, mitochondrial	DLD	sp|P09622|DLDH_HUMAN Dihydrolipoyl dehydrogenase, mitochondrial OS=Homo sapiens GN=DLD PE=1 SV=2	1	2	2	2	1	1	1	1	0	0	2	1	1	1	1	1	1	1	1	0	1	1	1	1	0	0	2	1	1	1	1	1	1	1	1	0	1	1	1	1	0	0
P09651	P09651	6	6	3	Heterogeneous nuclear ribonucleoprotein A1;Heterogeneous nuclear ribonucleoprotein A1, N-terminally processed	HNRNPA1	sp|P09651|ROA1_HUMAN Heterogeneous nuclear ribonucleoprotein A1 OS=Homo sapiens GN=HNRNPA1 PE=1 SV=5	1	6	6	3	2	5	4	3	2	5	4	3	5	5	4	4	3	3	1	2	2	5	4	3	2	5	4	3	5	5	4	4	3	3	1	2	1	3	3	3	1	3
P09661	P09661	2	2	2	U2 small nuclear ribonucleoprotein A	SNRPA1	sp|P09661|RU2A_HUMAN U2 small nuclear ribonucleoprotein A OS=Homo sapiens GN=SNRPA1 PE=1 SV=2	1	2	2	2	1	1	2	2	1	1	1	1	2	2	1	1	0	2	0	1	1	1	2	2	1	1	1	1	2	2	1	1	0	2	0	1	1	1	2	2	1	1
P09874	P09874	9	9	9	Poly [ADP-ribose] polymerase 1	PARP1	sp|P09874|PARP1_HUMAN Poly [ADP-ribose] polymerase 1 OS=Homo sapiens GN=PARP1 PE=1 SV=4	1	9	9	9	6	5	4	5	4	5	7	8	4	5	3	4	5	6	3	2	6	5	4	5	4	5	7	8	4	5	3	4	5	6	3	2	6	5	4	5	4	5
P09884	P09884	5	5	5	DNA polymerase alpha catalytic subunit	POLA1	sp|P09884|DPOLA_HUMAN DNA polymerase alpha catalytic subunit OS=Homo sapiens GN=POLA1 PE=1 SV=2	1	5	5	5	2	2	1	1	1	0	2	3	3	4	2	1	2	2	2	0	2	2	1	1	1	0	2	3	3	4	2	1	2	2	2	0	2	2	1	1	1	0
P09914	P09914	1	1	1	Interferon-induced protein with tetratricopeptide repeats 1	IFIT1	sp|P09914|IFIT1_HUMAN Interferon-induced protein with tetratricopeptide repeats 1 OS=Homo sapiens GN=IFIT1 PE=1 SV=2	1	1	1	1	1	0	1	1	0	0	0	0	1	1	0	0	1	0	0	0	1	0	1	1	0	0	0	0	1	1	0	0	1	0	0	0	1	0	1	1	0	0
P09936	P09936	1	1	1	Ubiquitin carboxyl-terminal hydrolase isozyme L1	UCHL1	sp|P09936|UCHL1_HUMAN Ubiquitin carboxyl-terminal hydrolase isozyme L1 OS=Homo sapiens GN=UCHL1 PE=1 SV=2	1	1	1	1	0	0	0	0	0	1	0	0	0	0	0	0	0	1	0	1	0	0	0	0	0	1	0	0	0	0	0	0	0	1	0	1	0	0	0	0	0	1
P09960	P09960	6	6	6	Leukotriene A-4 hydrolase	LTA4H	sp|P09960|LKHA4_HUMAN Leukotriene A-4 hydrolase OS=Homo sapiens GN=LTA4H PE=1 SV=2	1	6	6	6	3	3	1	2	1	1	3	4	5	3	1	1	1	3	1	1	3	3	1	2	1	1	3	4	5	3	1	1	1	3	1	1	3	3	1	2	1	1
P09972	P09972	2	1	1	Fructose-bisphosphate aldolase C	ALDOC	sp|P09972|ALDOC_HUMAN Fructose-bisphosphate aldolase C OS=Homo sapiens GN=ALDOC PE=1 SV=2	1	2	1	1	2	2	2	2	2	1	2	2	2	2	1	2	2	2	1	2	1	1	1	1	1	1	1	1	1	1	1	1	1	1	1	1	1	1	1	1	1	1
P0C0L5;P0C0L4	P0C0L5;P0C0L4	1;1	1;1	1;1	Complement C4-B;Complement C4 beta chain;Complement C4-B alpha chain;C4a anaphylatoxin;C4b-B;C4d-B;Complement C4 gamma chain;Complement C4-A;Complement C4 beta chain;Complement C4-A alpha chain;C4a anaphylatoxin;C4b-A;C4d-A;Complement C4 gamma chain	C4B;C4A	sp|P0C0L5|CO4B_HUMAN Complement C4-B OS=Homo sapiens GN=C4B PE=1 SV=2;sp|P0C0L4|CO4A_HUMAN Complement C4-A OS=Homo sapiens GN=C4A PE=1 SV=2	2	1	1	1	0	1	0	0	0	0	0	0	1	0	0	0	1	1	0	0	0	1	0	0	0	0	0	0	1	0	0	0	1	1	0	0	0	1	0	0	0	0
Q71UI9;P0C0S5	Q71UI9;P0C0S5	2;2	2;2	2;2	Histone H2A.V;Histone H2A.Z	H2AFV;H2AFZ	sp|Q71UI9|H2AV_HUMAN Histone H2A.V OS=Homo sapiens GN=H2AFV PE=1 SV=3;sp|P0C0S5|H2AZ_HUMAN Histone H2A.Z OS=Homo sapiens GN=H2AFZ PE=1 SV=2	2	2	2	2	0	0	1	1	0	0	2	0	0	1	0	0	0	0	0	0	0	0	1	1	0	0	2	0	0	1	0	0	0	0	0	0	0	0	1	1	0	0
P0C7H9	P0C7H9	1	1	1	Inactive ubiquitin carboxyl-terminal hydrolase 17-like protein 7	USP17L7	sp|P0C7H9|U17L7_HUMAN Inactive ubiquitin carboxyl-terminal hydrolase 17-like protein 7 OS=Homo sapiens GN=USP17L7 PE=3 SV=1	1	1	1	1	0	0	0	0	0	0	0	1	0	0	0	0	0	0	0	0	0	0	0	0	0	0	0	1	0	0	0	0	0	0	0	0	0	0	0	0	0	0
Q9BZD3;P0CAP2	Q9BZD3;P0CAP2	1;1	1;1	1;1	Putative GRINL1B complex locus protein 2;DNA-directed RNA polymerase II subunit GRINL1A	GCOM2;POLR2M	sp|Q9BZD3|GCOM2_HUMAN Putative GRINL1B complex locus protein 2 OS=Homo sapiens GN=GCOM2 PE=5 SV=2;sp|P0CAP2|GRL1A_HUMAN DNA-directed RNA polymerase II subunit GRINL1A OS=Homo sapiens GN=POLR2M PE=1 SV=1	2	1	1	1	0	0	0	1	0	0	0	0	1	1	0	0	1	0	0	0	0	0	0	1	0	0	0	0	1	1	0	0	1	0	0	0	0	0	0	1	0	0
P0DMV8;P0DMV9;P48741	P0DMV8;P0DMV9	12;12;2	11;11;1	7;7;0	Heat shock 70 kDa protein 1A;Heat shock 70 kDa protein 1B	HSPA1A;HSPA1B	sp|P0DMV8|HS71A_HUMAN Heat shock 70 kDa protein 1A OS=Homo sapiens GN=HSPA1A PE=1 SV=1;sp|P0DMV9|HS71B_HUMAN Heat shock 70 kDa protein 1B OS=Homo sapiens GN=HSPA1B PE=1 SV=1	3	12	11	7	6	8	8	10	8	8	11	7	10	7	8	7	8	7	6	3	6	7	7	9	7	7	10	7	9	7	7	6	7	7	6	3	4	4	4	6	4	4
P0DN76;Q01081	P0DN76;Q01081	3;3	3;3	3;3	Splicing factor U2AF 35 kDa subunit	U2AF1	sp|P0DN76|U2AF5_HUMAN Splicing factor U2AF 35 kDa subunit-like protein OS=Homo sapiens GN=U2AF1L5 PE=3 SV=1;sp|Q01081|U2AF1_HUMAN Splicing factor U2AF 35 kDa subunit OS=Homo sapiens GN=U2AF1 PE=1 SV=3	2	3	3	3	1	1	1	1	0	1	0	1	1	1	1	1	1	0	1	0	1	1	1	1	0	1	0	1	1	1	1	1	1	0	1	0	1	1	1	1	0	1
P10070	P10070	1	1	1	Zinc finger protein GLI2	GLI2	sp|P10070|GLI2_HUMAN Zinc finger protein GLI2 OS=Homo sapiens GN=GLI2 PE=1 SV=4	1	1	1	1	0	0	1	0	0	0	0	0	0	0	0	0	0	0	0	0	0	0	1	0	0	0	0	0	0	0	0	0	0	0	0	0	0	0	1	0	0	0
P10109	P10109	1	1	1	Adrenodoxin, mitochondrial	FDX1	sp|P10109|ADX_HUMAN Adrenodoxin, mitochondrial OS=Homo sapiens GN=FDX1 PE=1 SV=1	1	1	1	1	0	0	0	0	1	0	0	0	0	0	1	1	1	1	1	0	0	0	0	0	1	0	0	0	0	0	1	1	1	1	1	0	0	0	0	0	1	0
Q9Y3L5;P61225;P10114	Q9Y3L5;P61225;P10114	2;2;2	2;2;2	2;2;2	Ras-related protein Rap-2c;Ras-related protein Rap-2b;Ras-related protein Rap-2a	RAP2C;RAP2B;RAP2A	sp|Q9Y3L5|RAP2C_HUMAN Ras-related protein Rap-2c OS=Homo sapiens GN=RAP2C PE=1 SV=1;sp|P61225|RAP2B_HUMAN Ras-related protein Rap-2b OS=Homo sapiens GN=RAP2B PE=1 SV=1;sp|P10114|RAP2A_HUMAN Ras-related protein Rap-2a OS=Homo sapiens GN=RAP2A PE=1 SV=1	3	2	2	2	0	0	1	1	1	1	0	2	1	0	1	1	1	1	1	0	0	0	1	1	1	1	0	2	1	0	1	1	1	1	1	0	0	0	1	1	1	1
P10155	P10155	5	5	5	60 kDa SS-A/Ro ribonucleoprotein	TROVE2	sp|P10155|RO60_HUMAN 60 kDa SS-A/Ro ribonucleoprotein OS=Homo sapiens GN=TROVE2 PE=1 SV=2	1	5	5	5	3	2	3	3	0	0	4	2	2	1	0	0	2	0	1	0	3	2	3	3	0	0	4	2	2	1	0	0	2	0	1	0	3	2	3	3	0	0
P10253	P10253	2	2	2	Lysosomal alpha-glucosidase;76 kDa lysosomal alpha-glucosidase;70 kDa lysosomal alpha-glucosidase	GAA	sp|P10253|LYAG_HUMAN Lysosomal alpha-glucosidase OS=Homo sapiens GN=GAA PE=1 SV=4	1	2	2	2	0	0	1	1	0	0	0	1	1	1	0	0	1	0	0	0	0	0	1	1	0	0	0	1	1	1	0	0	1	0	0	0	0	0	1	1	0	0
P10301	P10301	1	1	1	Ras-related protein R-Ras	RRAS	sp|P10301|RRAS_HUMAN Ras-related protein R-Ras OS=Homo sapiens GN=RRAS PE=1 SV=1	1	1	1	1	1	1	1	1	0	0	1	0	1	1	0	0	0	0	0	0	1	1	1	1	0	0	1	0	1	1	0	0	0	0	0	0	1	1	1	1	0	0
P10319;Q95365;Q29940;Q29836;Q29718;P30685;P30498;P30495;P30493;P30492;P30491;P30490;P30488;P30487;P30484;P30483;P30475;P30466;P30464;P30462;P18464;P18463;P30511	P10319;Q95365;Q29940;Q29836;Q29718;P30685;P30498;P30495;P30493;P30492;P30491;P30490;P30488;P30487;P30484;P30483;P30475;P30466;P30464;P30462;P18464;P18463	6;5;5;5;5;5;5;5;5;5;5;5;5;5;5;5;5;5;5;5;5;5;1	1;1;1;1;1;1;1;1;1;1;1;1;1;1;1;1;1;1;1;1;1;1;0	0;0;0;0;0;0;0;0;0;0;0;0;0;0;0;0;0;0;0;0;0;0;0	HLA class I histocompatibility antigen, B-58 alpha chain;HLA class I histocompatibility antigen, B-38 alpha chain;HLA class I histocompatibility antigen, B-59 alpha chain;HLA class I histocompatibility antigen, B-67 alpha chain;HLA class I histocompatibility antigen, B-82 alpha chain;HLA class I histocompatibility antigen, B-35 alpha chain;HLA class I histocompatibility antigen, B-78 alpha chain;…	HLA-B	sp|P10319|1B58_HUMAN HLA class I histocompatibility antigen, B-58 alpha chain OS=Homo sapiens GN=HLA-B PE=1 SV=1;sp|Q95365|1B38_HUMAN HLA class I histocompatibility antigen, B-38 alpha chain OS=Homo sapiens GN=HLA-B PE=1 SV=1;sp|Q29940|1B59_HUMAN HLA class	23	6	1	0	3	2	3	2	2	2	2	2	3	3	3	2	2	3	2	2	1	1	1	0	1	1	0	0	0	0	1	1	0	0	0	0	0	0	0	0	0	0
P10321	P10321	5	2	2	HLA class I histocompatibility antigen, Cw-7 alpha chain	HLA-C	sp|P10321|1C07_HUMAN HLA class I histocompatibility antigen, Cw-7 alpha chain OS=Homo sapiens GN=HLA-C PE=1 SV=3	1	5	2	2	1	1	1	1	1	1	2	4	1	2	2	1	3	3	1	1	0	0	0	0	0	0	1	2	0	1	0	0	1	0	1	0	0	0	0	0	0	0
P10412	P10412	1	1	1	Histone H1.4	HIST1H1E	sp|P10412|H14_HUMAN Histone H1.4 OS=Homo sapiens GN=HIST1H1E PE=1 SV=2	1	1	1	1	1	0	1	1	0	0	0	0	0	0	0	0	0	0	0	0	1	0	1	1	0	0	0	0	0	0	0	0	0	0	0	0	1	0	1	1	0	0
P10515	P10515	4	4	4	Dihydrolipoyllysine-residue acetyltransferase component of pyruvate dehydrogenase complex, mitochondrial	DLAT	sp|P10515|ODP2_HUMAN Dihydrolipoyllysine-residue acetyltransferase component of pyruvate dehydrogenase complex, mitochondrial OS=Homo sapiens GN=DLAT PE=1 SV=3	1	4	4	4	2	1	0	1	0	1	2	4	0	1	0	0	2	2	0	0	2	1	0	1	0	1	2	4	0	1	0	0	2	2	0	0	2	1	0	1	0	1
P10586	P10586	8	8	8	Receptor-type tyrosine-protein phosphatase F	PTPRF	sp|P10586|PTPRF_HUMAN Receptor-type tyrosine-protein phosphatase F OS=Homo sapiens GN=PTPRF PE=1 SV=2	1	8	8	8	1	4	3	2	0	1	5	2	4	1	0	1	2	1	1	0	1	4	3	2	0	1	5	2	4	1	0	1	2	1	1	0	1	4	3	2	0	1
P10599	P10599	1	1	1	Thioredoxin	TXN	sp|P10599|THIO_HUMAN Thioredoxin OS=Homo sapiens GN=TXN PE=1 SV=3	1	1	1	1	1	1	1	1	1	1	1	1	0	1	1	1	1	1	1	0	1	1	1	1	1	1	1	1	0	1	1	1	1	1	1	0	1	1	1	1	1	1
P10606	P10606	1	1	1	Cytochrome c oxidase subunit 5B, mitochondrial	COX5B	sp|P10606|COX5B_HUMAN Cytochrome c oxidase subunit 5B, mitochondrial OS=Homo sapiens GN=COX5B PE=1 SV=2	1	1	1	1	1	1	1	1	0	1	1	1	1	1	1	1	1	0	1	0	1	1	1	1	0	1	1	1	1	1	1	1	1	0	1	0	1	1	1	1	0	1
P10619	P10619	2	2	2	Lysosomal protective protein;Lysosomal protective protein 32 kDa chain;Lysosomal protective protein 20 kDa chain	CTSA	sp|P10619|PPGB_HUMAN Lysosomal protective protein OS=Homo sapiens GN=CTSA PE=1 SV=2	1	2	2	2	1	1	1	1	1	1	1	1	1	1	2	1	2	1	1	0	1	1	1	1	1	1	1	1	1	1	2	1	2	1	1	0	1	1	1	1	1	1
P10646	P10646	2	2	2	Tissue factor pathway inhibitor	TFPI	sp|P10646|TFPI1_HUMAN Tissue factor pathway inhibitor OS=Homo sapiens GN=TFPI PE=1 SV=1	1	2	2	2	1	1	2	1	0	0	2	1	1	1	0	0	0	0	0	0	1	1	2	1	0	0	2	1	1	1	0	0	0	0	0	0	1	1	2	1	0	0
P10768	P10768	7	7	7	S-formylglutathione hydrolase	ESD	sp|P10768|ESTD_HUMAN S-formylglutathione hydrolase OS=Homo sapiens GN=ESD PE=1 SV=2	1	7	7	7	5	5	5	4	4	3	7	7	7	7	4	4	4	5	4	1	5	5	5	4	4	3	7	7	7	7	4	4	4	5	4	1	5	5	5	4	4	3
P10809	P10809	11	11	11	60 kDa heat shock protein, mitochondrial	HSPD1	sp|P10809|CH60_HUMAN 60 kDa heat shock protein, mitochondrial OS=Homo sapiens GN=HSPD1 PE=1 SV=2	1	11	11	11	4	5	6	7	5	5	8	8	6	8	5	7	7	7	4	4	4	5	6	7	5	5	8	8	6	8	5	7	7	7	4	4	4	5	6	7	5	5
P10909	P10909	1	1	1	Clusterin;Clusterin beta chain;Clusterin alpha chain	CLU	sp|P10909|CLUS_HUMAN Clusterin OS=Homo sapiens GN=CLU PE=1 SV=1	1	1	1	1	0	0	0	0	0	0	0	1	0	0	0	0	0	0	0	0	0	0	0	0	0	0	0	1	0	0	0	0	0	0	0	0	0	0	0	0	0	0
P11021	P11021	13	12	12	78 kDa glucose-regulated protein	HSPA5	sp|P11021|GRP78_HUMAN 78 kDa glucose-regulated protein OS=Homo sapiens GN=HSPA5 PE=1 SV=2	1	13	12	12	6	7	5	6	7	6	4	7	7	6	9	6	5	7	5	2	5	6	5	6	6	5	4	6	7	6	8	6	5	7	5	2	5	6	5	6	6	5
P11047	P11047	10	10	10	Laminin subunit gamma-1	LAMC1	sp|P11047|LAMC1_HUMAN Laminin subunit gamma-1 OS=Homo sapiens GN=LAMC1 PE=1 SV=3	1	10	10	10	4	5	6	5	1	1	6	8	4	5	2	0	5	3	4	0	4	5	6	5	1	1	6	8	4	5	2	0	5	3	4	0	4	5	6	5	1	1
P11117	P11117	1	1	1	Lysosomal acid phosphatase	ACP2	sp|P11117|PPAL_HUMAN Lysosomal acid phosphatase OS=Homo sapiens GN=ACP2 PE=1 SV=3	1	1	1	1	1	1	0	0	1	0	1	0	0	0	1	0	1	0	0	0	1	1	0	0	1	0	1	0	0	0	1	0	1	0	0	0	1	1	0	0	1	0
P11142	P11142	17	17	14	Heat shock cognate 71 kDa protein	HSPA8	sp|P11142|HSP7C_HUMAN Heat shock cognate 71 kDa protein OS=Homo sapiens GN=HSPA8 PE=1 SV=1	1	17	17	14	13	14	11	10	11	11	15	11	11	10	9	8	10	10	8	5	13	14	11	10	11	11	15	11	11	10	9	8	10	10	8	5	12	12	9	9	8	9
P11166	P11166	1	1	1	Solute carrier family 2, facilitated glucose transporter member 1	SLC2A1	sp|P11166|GTR1_HUMAN Solute carrier family 2, facilitated glucose transporter member 1 OS=Homo sapiens GN=SLC2A1 PE=1 SV=2	1	1	1	1	1	1	0	0	1	0	0	0	0	0	1	1	1	0	1	0	1	1	0	0	1	0	0	0	0	0	1	1	1	0	1	0	1	1	0	0	1	0
P11172	P11172	5	5	5	Uridine 5-monophosphate synthase;Orotate phosphoribosyltransferase;Orotidine 5-phosphate decarboxylase	UMPS	sp|P11172|UMPS_HUMAN Uridine 5-monophosphate synthase OS=Homo sapiens GN=UMPS PE=1 SV=1	1	5	5	5	4	2	2	1	1	1	4	2	3	3	1	1	2	0	1	0	4	2	2	1	1	1	4	2	3	3	1	1	2	0	1	0	4	2	2	1	1	1
P11177	P11177	3	3	3	Pyruvate dehydrogenase E1 component subunit beta, mitochondrial	PDHB	sp|P11177|ODPB_HUMAN Pyruvate dehydrogenase E1 component subunit beta, mitochondrial OS=Homo sapiens GN=PDHB PE=1 SV=3	1	3	3	3	1	1	3	1	1	0	2	2	2	2	2	2	2	1	2	0	1	1	3	1	1	0	2	2	2	2	2	2	2	1	2	0	1	1	3	1	1	0
P11182	P11182	4	4	4	Lipoamide acyltransferase component of branched-chain alpha-keto acid dehydrogenase complex, mitochondrial	DBT	sp|P11182|ODB2_HUMAN Lipoamide acyltransferase component of branched-chain alpha-keto acid dehydrogenase complex, mitochondrial OS=Homo sapiens GN=DBT PE=1 SV=3	1	4	4	4	1	1	0	0	1	0	2	1	0	0	1	0	2	0	2	0	1	1	0	0	1	0	2	1	0	0	1	0	2	0	2	0	1	1	0	0	1	0
P11216;P11217	P11216	6;1	6;1	5;0	Glycogen phosphorylase, brain form	PYGB	sp|P11216|PYGB_HUMAN Glycogen phosphorylase, brain form OS=Homo sapiens GN=PYGB PE=1 SV=5	2	6	6	5	5	5	1	4	1	1	5	4	4	4	2	2	2	2	2	2	5	5	1	4	1	1	5	4	4	4	2	2	2	2	2	2	4	4	1	3	1	1
P11234;P11233	P11234;P11233	2;2	2;2	2;2	Ras-related protein Ral-B;Ras-related protein Ral-A	RALB;RALA	sp|P11234|RALB_HUMAN Ras-related protein Ral-B OS=Homo sapiens GN=RALB PE=1 SV=1;sp|P11233|RALA_HUMAN Ras-related protein Ral-A OS=Homo sapiens GN=RALA PE=1 SV=1	2	2	2	2	1	1	1	2	1	1	2	2	2	2	1	1	2	1	2	1	1	1	1	2	1	1	2	2	2	2	1	1	2	1	2	1	1	1	1	2	1	1
P11310	P11310	2	2	2	Medium-chain specific acyl-CoA dehydrogenase, mitochondrial	ACADM	sp|P11310|ACADM_HUMAN Medium-chain specific acyl-CoA dehydrogenase, mitochondrial OS=Homo sapiens GN=ACADM PE=1 SV=1	1	2	2	2	0	0	1	0	0	0	1	1	1	1	0	0	1	0	0	0	0	0	1	0	0	0	1	1	1	1	0	0	1	0	0	0	0	0	1	0	0	0
P11387	P11387	2	2	2	DNA topoisomerase 1	TOP1	sp|P11387|TOP1_HUMAN DNA topoisomerase 1 OS=Homo sapiens GN=TOP1 PE=1 SV=2	1	2	2	2	2	1	0	0	0	0	1	1	2	1	0	0	2	2	1	0	2	1	0	0	0	0	1	1	2	1	0	0	2	2	1	0	2	1	0	0	0	0
P11388	P11388	14	14	14	DNA topoisomerase 2-alpha	TOP2A	sp|P11388|TOP2A_HUMAN DNA topoisomerase 2-alpha OS=Homo sapiens GN=TOP2A PE=1 SV=3	1	14	14	14	8	8	8	9	6	5	10	10	8	7	6	8	8	7	6	0	8	8	8	9	6	5	10	10	8	7	6	8	8	7	6	0	8	8	8	9	6	5
P11413	P11413	4	4	4	Glucose-6-phosphate 1-dehydrogenase	G6PD	sp|P11413|G6PD_HUMAN Glucose-6-phosphate 1-dehydrogenase OS=Homo sapiens GN=G6PD PE=1 SV=4	1	4	4	4	1	1	0	0	0	0	1	1	1	0	0	0	1	1	0	0	1	1	0	0	0	0	1	1	1	0	0	0	1	1	0	0	1	1	0	0	0	0
P11474	P11474	2	2	2	Steroid hormone receptor ERR1	ESRRA	sp|P11474|ERR1_HUMAN Steroid hormone receptor ERR1 OS=Homo sapiens GN=ESRRA PE=1 SV=3	1	2	2	2	0	0	0	0	0	0	0	0	0	1	0	0	0	0	1	0	0	0	0	0	0	0	0	0	0	1	0	0	0	0	1	0	0	0	0	0	0	0
P11498	P11498	4	4	4	Pyruvate carboxylase, mitochondrial	PC	sp|P11498|PYC_HUMAN Pyruvate carboxylase, mitochondrial OS=Homo sapiens GN=PC PE=1 SV=2	1	4	4	4	0	1	1	1	1	1	1	0	1	1	1	1	1	0	0	1	0	1	1	1	1	1	1	0	1	1	1	1	1	0	0	1	0	1	1	1	1	1
P11586	P11586	6	6	6	C-1-tetrahydrofolate synthase, cytoplasmic;Methylenetetrahydrofolate dehydrogenase;Methenyltetrahydrofolate cyclohydrolase;Formyltetrahydrofolate synthetase;C-1-tetrahydrofolate synthase, cytoplasmic, N-terminally processed	MTHFD1	sp|P11586|C1TC_HUMAN C-1-tetrahydrofolate synthase, cytoplasmic OS=Homo sapiens GN=MTHFD1 PE=1 SV=3	1	6	6	6	2	2	2	2	0	1	3	2	3	4	0	0	2	1	1	0	2	2	2	2	0	1	3	2	3	4	0	0	2	1	1	0	2	2	2	2	0	1
P11717	P11717	24	24	24	Cation-independent mannose-6-phosphate receptor	IGF2R	sp|P11717|MPRI_HUMAN Cation-independent mannose-6-phosphate receptor OS=Homo sapiens GN=IGF2R PE=1 SV=3	1	24	24	24	14	15	15	16	13	12	17	19	14	15	13	13	16	14	14	3	14	15	15	16	13	12	17	19	14	15	13	13	16	14	14	3	14	15	15	16	13	12
P11766	P11766	2	2	2	Alcohol dehydrogenase class-3	ADH5	sp|P11766|ADHX_HUMAN Alcohol dehydrogenase class-3 OS=Homo sapiens GN=ADH5 PE=1 SV=4	1	2	2	2	1	0	1	1	0	0	1	0	1	1	0	0	0	1	0	0	1	0	1	1	0	0	1	0	1	1	0	0	0	1	0	0	1	0	1	1	0	0
P11802	P11802	1	1	1	Cyclin-dependent kinase 4	CDK4	sp|P11802|CDK4_HUMAN Cyclin-dependent kinase 4 OS=Homo sapiens GN=CDK4 PE=1 SV=2	1	1	1	1	0	0	1	0	0	0	1	1	1	1	0	0	1	1	1	0	0	0	1	0	0	0	1	1	1	1	0	0	1	1	1	0	0	0	1	0	0	0
P11908	P11908	2	2	2	Ribose-phosphate pyrophosphokinase 2	PRPS2	sp|P11908|PRPS2_HUMAN Ribose-phosphate pyrophosphokinase 2 OS=Homo sapiens GN=PRPS2 PE=1 SV=2	1	2	2	2	0	1	1	1	0	0	1	1	1	1	0	0	2	2	0	1	0	1	1	1	0	0	1	1	1	1	0	0	2	2	0	1	0	1	1	1	0	0
P11940;Q4VXU2;Q9H361	P11940	7;1;1	7;1;1	4;0;0	Polyadenylate-binding protein 1	PABPC1	sp|P11940|PABP1_HUMAN Polyadenylate-binding protein 1 OS=Homo sapiens GN=PABPC1 PE=1 SV=2	3	7	7	4	3	3	4	6	2	2	4	5	5	4	3	2	6	5	2	1	3	3	4	6	2	2	4	5	5	4	3	2	6	5	2	1	2	2	3	3	0	0
P12004	P12004	5	5	5	Proliferating cell nuclear antigen	PCNA	sp|P12004|PCNA_HUMAN Proliferating cell nuclear antigen OS=Homo sapiens GN=PCNA PE=1 SV=1	1	5	5	5	5	5	4	4	2	3	4	5	4	4	2	1	4	5	4	1	5	5	4	4	2	3	4	5	4	4	2	1	4	5	4	1	5	5	4	4	2	3
P12074	P12074	2	2	2	Cytochrome c oxidase subunit 6A1, mitochondrial	COX6A1	sp|P12074|CX6A1_HUMAN Cytochrome c oxidase subunit 6A1, mitochondrial OS=Homo sapiens GN=COX6A1 PE=1 SV=4	1	2	2	2	1	1	1	1	0	0	1	2	1	0	0	0	0	1	1	0	1	1	1	1	0	0	1	2	1	0	0	0	0	1	1	0	1	1	1	1	0	0
P12081	P12081	3	3	3	Histidine--tRNA ligase, cytoplasmic	HARS	sp|P12081|SYHC_HUMAN Histidine--tRNA ligase, cytoplasmic OS=Homo sapiens GN=HARS PE=1 SV=2	1	3	3	3	2	2	2	2	2	2	2	3	3	3	1	2	2	2	1	0	2	2	2	2	2	2	2	3	3	3	1	2	2	2	1	0	2	2	2	2	2	2
P12107	P12107	2	2	2	Collagen alpha-1(XI) chain	COL11A1	sp|P12107|COBA1_HUMAN Collagen alpha-1(XI) chain OS=Homo sapiens GN=COL11A1 PE=1 SV=4	1	2	2	2	0	0	1	0	0	0	0	0	0	1	0	0	0	0	0	0	0	0	1	0	0	0	0	0	0	1	0	0	0	0	0	0	0	0	1	0	0	0
P12109	P12109	2	2	2	Collagen alpha-1(VI) chain	COL6A1	sp|P12109|CO6A1_HUMAN Collagen alpha-1(VI) chain OS=Homo sapiens GN=COL6A1 PE=1 SV=3	1	2	2	2	0	1	0	1	0	0	0	0	0	0	0	0	0	0	0	0	0	1	0	1	0	0	0	0	0	0	0	0	0	0	0	0	0	1	0	1	0	0
P12236;P12235;Q9H0C2	P12236;P12235	5;3;1	5;3;1	4;2;0	ADP/ATP translocase 3;ADP/ATP translocase 3, N-terminally processed;ADP/ATP translocase 1	SLC25A6;SLC25A4	sp|P12236|ADT3_HUMAN ADP/ATP translocase 3 OS=Homo sapiens GN=SLC25A6 PE=1 SV=4;sp|P12235|ADT1_HUMAN ADP/ATP translocase 1 OS=Homo sapiens GN=SLC25A4 PE=1 SV=4	3	5	5	4	1	2	1	1	3	1	1	2	1	1	2	2	2	1	1	1	1	2	1	1	3	1	1	2	1	1	2	2	2	1	1	1	1	2	1	1	2	1
P12268	P12268	5	5	5	Inosine-5-monophosphate dehydrogenase 2	IMPDH2	sp|P12268|IMDH2_HUMAN Inosine-5-monophosphate dehydrogenase 2 OS=Homo sapiens GN=IMPDH2 PE=1 SV=2	1	5	5	5	3	3	3	2	0	0	4	3	4	3	0	0	1	0	0	0	3	3	3	2	0	0	4	3	4	3	0	0	1	0	0	0	3	3	3	2	0	0
P12270	P12270	12	12	12	Nucleoprotein TPR	TPR	sp|P12270|TPR_HUMAN Nucleoprotein TPR OS=Homo sapiens GN=TPR PE=1 SV=3	1	12	12	12	2	4	5	6	3	3	7	5	8	8	3	2	6	3	4	0	2	4	5	6	3	3	7	5	8	8	3	2	6	3	4	0	2	4	5	6	3	3
P12429	P12429	1	1	1	Annexin A3	ANXA3	sp|P12429|ANXA3_HUMAN Annexin A3 OS=Homo sapiens GN=ANXA3 PE=1 SV=3	1	1	1	1	0	0	0	0	0	0	1	1	0	0	0	0	0	1	0	0	0	0	0	0	0	0	1	1	0	0	0	0	0	1	0	0	0	0	0	0	0	0
P12694	P12694	2	2	2	2-oxoisovalerate dehydrogenase subunit alpha, mitochondrial	BCKDHA	sp|P12694|ODBA_HUMAN 2-oxoisovalerate dehydrogenase subunit alpha, mitochondrial OS=Homo sapiens GN=BCKDHA PE=1 SV=2	1	2	2	2	0	1	0	1	0	0	1	2	0	1	0	0	1	1	0	0	0	1	0	1	0	0	1	2	0	1	0	0	1	1	0	0	0	1	0	1	0	0
P12814;P35609;Q08043	P12814	20;3;3	20;3;3	16;1;1	Alpha-actinin-1	ACTN1	sp|P12814|ACTN1_HUMAN Alpha-actinin-1 OS=Homo sapiens GN=ACTN1 PE=1 SV=2	3	20	20	16	12	16	11	8	8	8	13	8	11	7	9	9	9	6	7	4	12	16	11	8	8	8	13	8	11	7	9	9	9	6	7	4	10	12	9	8	7	6
P12955	P12955	5	5	5	Xaa-Pro dipeptidase	PEPD	sp|P12955|PEPD_HUMAN Xaa-Pro dipeptidase OS=Homo sapiens GN=PEPD PE=1 SV=3	1	5	5	5	1	2	1	1	1	2	1	2	3	2	0	0	1	3	0	1	1	2	1	1	1	2	1	2	3	2	0	0	1	3	0	1	1	2	1	1	1	2
P12956	P12956	8	8	8	X-ray repair cross-complementing protein 6	XRCC6	sp|P12956|XRCC6_HUMAN X-ray repair cross-complementing protein 6 OS=Homo sapiens GN=XRCC6 PE=1 SV=2	1	8	8	8	6	5	5	4	4	5	5	8	5	5	5	4	5	5	5	2	6	5	5	4	4	5	5	8	5	5	5	4	5	5	5	2	6	5	5	4	4	5
P13010	P13010	15	15	15	X-ray repair cross-complementing protein 5	XRCC5	sp|P13010|XRCC5_HUMAN X-ray repair cross-complementing protein 5 OS=Homo sapiens GN=XRCC5 PE=1 SV=3	1	15	15	15	10	11	10	10	10	9	11	10	10	10	6	9	8	13	7	6	10	11	10	10	10	9	11	10	10	10	6	9	8	13	7	6	10	11	10	10	10	9
P13051	P13051	5	5	5	Uracil-DNA glycosylase	UNG	sp|P13051|UNG_HUMAN Uracil-DNA glycosylase OS=Homo sapiens GN=UNG PE=1 SV=2	1	5	5	5	1	2	1	1	0	0	1	1	1	0	0	0	0	0	0	0	1	2	1	1	0	0	1	1	1	0	0	0	0	0	0	0	1	2	1	1	0	0
P13196	P13196	2	2	2	5-aminolevulinate synthase, nonspecific, mitochondrial	ALAS1	sp|P13196|HEM1_HUMAN 5-aminolevulinate synthase, nonspecific, mitochondrial OS=Homo sapiens GN=ALAS1 PE=1 SV=2	1	2	2	2	0	0	0	0	0	0	1	0	1	1	0	0	0	0	0	0	0	0	0	0	0	0	1	0	1	1	0	0	0	0	0	0	0	0	0	0	0	0
P13473	P13473	2	2	2	Lysosome-associated membrane glycoprotein 2	LAMP2	sp|P13473|LAMP2_HUMAN Lysosome-associated membrane glycoprotein 2 OS=Homo sapiens GN=LAMP2 PE=1 SV=2	1	2	2	2	2	1	0	0	0	0	0	0	0	0	0	0	0	0	0	0	2	1	0	0	0	0	0	0	0	0	0	0	0	0	0	0	2	1	0	0	0	0
P13489	P13489	8	8	8	Ribonuclease inhibitor	RNH1	sp|P13489|RINI_HUMAN Ribonuclease inhibitor OS=Homo sapiens GN=RNH1 PE=1 SV=2	1	8	8	8	7	6	5	6	5	4	6	8	6	6	4	4	6	5	3	3	7	6	5	6	5	4	6	8	6	6	4	4	6	5	3	3	7	6	5	6	5	4
P13611	P13611	6	6	6	Versican core protein	VCAN	sp|P13611|CSPG2_HUMAN Versican core protein OS=Homo sapiens GN=VCAN PE=1 SV=3	1	6	6	6	3	2	4	2	2	2	3	1	3	2	2	2	2	2	2	0	3	2	4	2	2	2	3	1	3	2	2	2	2	2	2	0	3	2	4	2	2	2
P13612	P13612	6	6	6	Integrin alpha-4	ITGA4	sp|P13612|ITA4_HUMAN Integrin alpha-4 OS=Homo sapiens GN=ITGA4 PE=1 SV=3	1	6	6	6	1	2	1	3	0	0	3	3	1	0	0	0	1	2	2	0	1	2	1	3	0	0	3	3	1	0	0	0	1	2	2	0	1	2	1	3	0	0
P13639	P13639	16	16	16	Elongation factor 2	EEF2	sp|P13639|EF2_HUMAN Elongation factor 2 OS=Homo sapiens GN=EEF2 PE=1 SV=4	1	16	16	16	11	11	8	10	8	7	14	11	10	10	6	7	10	8	6	6	11	11	8	10	8	7	14	11	10	10	6	7	10	8	6	6	11	11	8	10	8	7
P13667	P13667	9	9	9	Protein disulfide-isomerase A4	PDIA4	sp|P13667|PDIA4_HUMAN Protein disulfide-isomerase A4 OS=Homo sapiens GN=PDIA4 PE=1 SV=2	1	9	9	9	6	6	5	5	5	4	7	6	6	5	6	6	5	5	5	3	6	6	5	5	5	4	7	6	6	5	6	6	5	5	5	3	6	6	5	5	5	4
P13674	P13674	3	3	3	Prolyl 4-hydroxylase subunit alpha-1	P4HA1	sp|P13674|P4HA1_HUMAN Prolyl 4-hydroxylase subunit alpha-1 OS=Homo sapiens GN=P4HA1 PE=1 SV=2	1	3	3	3	2	2	2	2	1	1	2	2	2	2	0	0	2	1	0	0	2	2	2	2	1	1	2	2	2	2	0	0	2	1	0	0	2	2	2	2	1	1
P13693	P13693	1	1	1	Translationally-controlled tumor protein	TPT1	sp|P13693|TCTP_HUMAN Translationally-controlled tumor protein OS=Homo sapiens GN=TPT1 PE=1 SV=1	1	1	1	1	1	1	1	1	1	1	1	1	1	1	0	1	1	1	1	0	1	1	1	1	1	1	1	1	1	1	0	1	1	1	1	0	1	1	1	1	1	1
P13726	P13726	1	1	1	Tissue factor	F3	sp|P13726|TF_HUMAN Tissue factor OS=Homo sapiens GN=F3 PE=1 SV=1	1	1	1	1	0	1	1	1	1	1	1	1	1	1	1	1	0	1	1	0	0	1	1	1	1	1	1	1	1	1	1	1	0	1	1	0	0	1	1	1	1	1
P13796	P13796	2	2	2	Plastin-2	LCP1	sp|P13796|PLSL_HUMAN Plastin-2 OS=Homo sapiens GN=LCP1 PE=1 SV=6	1	2	2	2	2	2	2	1	0	0	2	1	2	2	0	0	1	0	0	0	2	2	2	1	0	0	2	1	2	2	0	0	1	0	0	0	2	2	2	1	0	0
P13797	P13797	7	7	7	Plastin-3	PLS3	sp|P13797|PLST_HUMAN Plastin-3 OS=Homo sapiens GN=PLS3 PE=1 SV=4	1	7	7	7	3	3	2	3	2	3	3	3	3	3	2	4	2	4	3	0	3	3	2	3	2	3	3	3	3	3	2	4	2	4	3	0	3	3	2	3	2	3
P13798	P13798	5	5	5	Acylamino-acid-releasing enzyme	APEH	sp|P13798|ACPH_HUMAN Acylamino-acid-releasing enzyme OS=Homo sapiens GN=APEH PE=1 SV=4	1	5	5	5	1	0	2	1	1	2	1	3	3	2	2	0	1	0	1	0	1	0	2	1	1	2	1	3	3	2	2	0	1	0	1	0	1	0	2	1	1	2
P13804	P13804	2	2	2	Electron transfer flavoprotein subunit alpha, mitochondrial	ETFA	sp|P13804|ETFA_HUMAN Electron transfer flavoprotein subunit alpha, mitochondrial OS=Homo sapiens GN=ETFA PE=1 SV=1	1	2	2	2	2	2	1	1	2	2	2	2	1	2	0	1	2	1	1	1	2	2	1	1	2	2	2	2	1	2	0	1	2	1	1	1	2	2	1	1	2	2
P13807	P13807	8	8	8	Glycogen [starch] synthase, muscle	GYS1	sp|P13807|GYS1_HUMAN Glycogen [starch] synthase, muscle OS=Homo sapiens GN=GYS1 PE=1 SV=2	1	8	8	8	3	4	4	5	1	1	6	2	5	6	1	2	6	2	2	1	3	4	4	5	1	1	6	2	5	6	1	2	6	2	2	1	3	4	4	5	1	1
P13861	P13861	4	4	4	cAMP-dependent protein kinase type II-alpha regulatory subunit	PRKAR2A	sp|P13861|KAP2_HUMAN cAMP-dependent protein kinase type II-alpha regulatory subunit OS=Homo sapiens GN=PRKAR2A PE=1 SV=2	1	4	4	4	3	4	3	3	3	3	3	3	3	4	0	2	2	2	1	1	3	4	3	3	3	3	3	3	3	4	0	2	2	2	1	1	3	4	3	3	3	3
P13984	P13984	1	1	1	General transcription factor IIF subunit 2	GTF2F2	sp|P13984|T2FB_HUMAN General transcription factor IIF subunit 2 OS=Homo sapiens GN=GTF2F2 PE=1 SV=2	1	1	1	1	0	0	1	0	0	0	0	1	0	0	0	0	1	1	0	0	0	0	1	0	0	0	0	1	0	0	0	0	1	1	0	0	0	0	1	0	0	0
P13995	P13995	3	3	3	Bifunctional methylenetetrahydrofolate dehydrogenase/cyclohydrolase, mitochondrial;NAD-dependent methylenetetrahydrofolate dehydrogenase;Methenyltetrahydrofolate cyclohydrolase	MTHFD2	sp|P13995|MTDC_HUMAN Bifunctional methylenetetrahydrofolate dehydrogenase/cyclohydrolase, mitochondrial OS=Homo sapiens GN=MTHFD2 PE=1 SV=2	1	3	3	3	0	0	0	0	1	1	2	1	1	2	1	1	1	0	0	0	0	0	0	0	1	1	2	1	1	2	1	1	1	0	0	0	0	0	0	0	1	1
P14174	P14174	1	1	1	Macrophage migration inhibitory factor	MIF	sp|P14174|MIF_HUMAN Macrophage migration inhibitory factor OS=Homo sapiens GN=MIF PE=1 SV=4	1	1	1	1	1	1	1	1	1	1	1	1	1	1	1	1	1	1	1	0	1	1	1	1	1	1	1	1	1	1	1	1	1	1	1	0	1	1	1	1	1	1
P14209	P14209	3	3	3	CD99 antigen	CD99	sp|P14209|CD99_HUMAN CD99 antigen OS=Homo sapiens GN=CD99 PE=1 SV=1	1	3	3	3	3	3	2	1	1	1	3	2	3	3	1	1	1	1	2	0	3	3	2	1	1	1	3	2	3	3	1	1	1	1	2	0	3	3	2	1	1	1
P14314	P14314	10	10	10	Glucosidase 2 subunit beta	PRKCSH	sp|P14314|GLU2B_HUMAN Glucosidase 2 subunit beta OS=Homo sapiens GN=PRKCSH PE=1 SV=2	1	10	10	10	5	4	6	7	4	4	7	5	8	6	6	8	7	6	4	2	5	4	6	7	4	4	7	5	8	6	6	8	7	6	4	2	5	4	6	7	4	4
P14324	P14324	4	4	4	Farnesyl pyrophosphate synthase	FDPS	sp|P14324|FPPS_HUMAN Farnesyl pyrophosphate synthase OS=Homo sapiens GN=FDPS PE=1 SV=4	1	4	4	4	2	2	0	1	1	2	3	2	2	2	0	1	1	2	2	1	2	2	0	1	1	2	3	2	2	2	0	1	1	2	2	1	2	2	0	1	1	2
P14373	P14373	3	3	3	Zinc finger protein RFP	TRIM27	sp|P14373|TRI27_HUMAN Zinc finger protein RFP OS=Homo sapiens GN=TRIM27 PE=1 SV=1	1	3	3	3	0	1	1	1	0	1	2	1	0	1	0	0	0	0	1	0	0	1	1	1	0	1	2	1	0	1	0	0	0	0	1	0	0	1	1	1	0	1
P14550	P14550	5	5	5	Alcohol dehydrogenase [NADP(+)]	AKR1A1	sp|P14550|AK1A1_HUMAN Alcohol dehydrogenase [NADP(+)] OS=Homo sapiens GN=AKR1A1 PE=1 SV=3	1	5	5	5	2	2	2	2	1	1	3	3	3	2	1	1	2	5	2	0	2	2	2	2	1	1	3	3	3	2	1	1	2	5	2	0	2	2	2	2	1	1
P14618	P14618	8	8	8	Pyruvate kinase PKM	PKM	sp|P14618|KPYM_HUMAN Pyruvate kinase PKM OS=Homo sapiens GN=PKM PE=1 SV=4	1	8	8	8	3	5	3	3	3	5	4	5	4	4	3	3	4	4	3	2	3	5	3	3	3	5	4	5	4	4	3	3	4	4	3	2	3	5	3	3	3	5
P14625	P14625	14	14	14	Endoplasmin	HSP90B1	sp|P14625|ENPL_HUMAN Endoplasmin OS=Homo sapiens GN=HSP90B1 PE=1 SV=1	1	14	14	14	7	7	9	9	7	6	10	6	10	10	6	6	7	5	5	2	7	7	9	9	7	6	10	6	10	10	6	6	7	5	5	2	7	7	9	9	7	6
P14635	P14635	2	2	2	G2/mitotic-specific cyclin-B1	CCNB1	sp|P14635|CCNB1_HUMAN G2/mitotic-specific cyclin-B1 OS=Homo sapiens GN=CCNB1 PE=1 SV=1	1	2	2	2	1	1	0	0	0	0	1	0	2	1	0	0	0	0	0	0	1	1	0	0	0	0	1	0	2	1	0	0	0	0	0	0	1	1	0	0	0	0
P14735	P14735	3	3	2	Insulin-degrading enzyme	IDE	sp|P14735|IDE_HUMAN Insulin-degrading enzyme OS=Homo sapiens GN=IDE PE=1 SV=4	1	3	3	2	1	1	1	0	0	0	0	0	1	1	0	0	1	0	0	0	1	1	1	0	0	0	0	0	1	1	0	0	1	0	0	0	1	1	1	0	0	0
P14854	P14854	1	1	1	Cytochrome c oxidase subunit 6B1	COX6B1	sp|P14854|CX6B1_HUMAN Cytochrome c oxidase subunit 6B1 OS=Homo sapiens GN=COX6B1 PE=1 SV=2	1	1	1	1	1	1	1	1	1	1	1	1	1	1	1	1	1	1	1	1	1	1	1	1	1	1	1	1	1	1	1	1	1	1	1	1	1	1	1	1	1	1
P14859	P14859	2	2	2	POU domain, class 2, transcription factor 1	POU2F1	sp|P14859|PO2F1_HUMAN POU domain, class 2, transcription factor 1 OS=Homo sapiens GN=POU2F1 PE=1 SV=2	1	2	2	2	1	1	1	0	0	0	2	0	0	0	0	0	1	0	0	0	1	1	1	0	0	0	2	0	0	0	0	0	1	0	0	0	1	1	1	0	0	0
P14866	P14866	11	11	11	Heterogeneous nuclear ribonucleoprotein L	HNRNPL	sp|P14866|HNRPL_HUMAN Heterogeneous nuclear ribonucleoprotein L OS=Homo sapiens GN=HNRNPL PE=1 SV=2	1	11	11	11	7	7	8	8	5	4	7	9	6	7	4	5	6	8	6	4	7	7	8	8	5	4	7	9	6	7	4	5	6	8	6	4	7	7	8	8	5	4
P14868	P14868	2	2	2	Aspartate--tRNA ligase, cytoplasmic	DARS	sp|P14868|SYDC_HUMAN Aspartate--tRNA ligase, cytoplasmic OS=Homo sapiens GN=DARS PE=1 SV=2	1	2	2	2	1	1	1	2	1	1	2	2	2	2	1	1	1	1	0	0	1	1	1	2	1	1	2	2	2	2	1	1	1	1	0	0	1	1	1	2	1	1
P14921	P14921	4	4	4	Protein C-ets-1	ETS1	sp|P14921|ETS1_HUMAN Protein C-ets-1 OS=Homo sapiens GN=ETS1 PE=1 SV=1	1	4	4	4	0	1	2	0	1	0	1	0	1	1	4	1	2	0	3	0	0	1	2	0	1	0	1	0	1	1	4	1	2	0	3	0	0	1	2	0	1	0
P14923	P14923	1	1	1	Junction plakoglobin	JUP	sp|P14923|PLAK_HUMAN Junction plakoglobin OS=Homo sapiens GN=JUP PE=1 SV=3	1	1	1	1	0	0	0	0	0	0	0	0	0	0	0	0	0	1	0	0	0	0	0	0	0	0	0	0	0	0	0	0	0	1	0	0	0	0	0	0	0	0
P15121	P15121	5	5	5	Aldose reductase	AKR1B1	sp|P15121|ALDR_HUMAN Aldose reductase OS=Homo sapiens GN=AKR1B1 PE=1 SV=3	1	5	5	5	1	2	1	2	0	2	4	5	4	4	1	0	1	2	0	2	1	2	1	2	0	2	4	5	4	4	1	0	1	2	0	2	1	2	1	2	0	2
P15151	P15151	3	3	3	Poliovirus receptor	PVR	sp|P15151|PVR_HUMAN Poliovirus receptor OS=Homo sapiens GN=PVR PE=1 SV=2	1	3	3	3	0	1	0	0	0	0	2	1	1	1	0	0	2	0	0	0	0	1	0	0	0	0	2	1	1	1	0	0	2	0	0	0	0	1	0	0	0	0
P15170	P15170	7	7	5	Eukaryotic peptide chain release factor GTP-binding subunit ERF3A	GSPT1	sp|P15170|ERF3A_HUMAN Eukaryotic peptide chain release factor GTP-binding subunit ERF3A OS=Homo sapiens GN=GSPT1 PE=1 SV=1	1	7	7	5	3	6	4	4	2	2	4	5	3	4	4	2	3	2	4	0	3	6	4	4	2	2	4	5	3	4	4	2	3	2	4	0	3	5	3	3	2	2
P15260	P15260	1	1	1	Interferon gamma receptor 1	IFNGR1	sp|P15260|INGR1_HUMAN Interferon gamma receptor 1 OS=Homo sapiens GN=IFNGR1 PE=1 SV=1	1	1	1	1	0	0	1	1	0	0	0	0	1	1	0	0	1	0	0	0	0	0	1	1	0	0	0	0	1	1	0	0	1	0	0	0	0	0	1	1	0	0
P15291	P15291	2	2	2	Beta-1,4-galactosyltransferase 1;Lactose synthase A protein;N-acetyllactosamine synthase;Beta-N-acetylglucosaminylglycopeptide beta-1,4-galactosyltransferase;Beta-N-acetylglucosaminyl-glycolipid beta-1,4-galactosyltransferase;Processed beta-1,4-galactosyltransferase 1	B4GALT1	sp|P15291|B4GT1_HUMAN Beta-1,4-galactosyltransferase 1 OS=Homo sapiens GN=B4GALT1 PE=1 SV=5	1	2	2	2	1	1	1	1	1	0	0	1	1	1	0	2	1	2	1	1	1	1	1	1	1	0	0	1	1	1	0	2	1	2	1	1	1	1	1	1	1	0
P15311	P15311	2	1	1	Ezrin	EZR	sp|P15311|EZRI_HUMAN Ezrin OS=Homo sapiens GN=EZR PE=1 SV=4	1	2	1	1	2	2	2	2	2	2	2	2	2	2	1	1	2	2	1	1	1	1	1	1	1	1	1	1	1	1	1	1	1	1	1	1	1	1	1	1	1	1
P15336	P15336	1	1	1	Cyclic AMP-dependent transcription factor ATF-2	ATF2	sp|P15336|ATF2_HUMAN Cyclic AMP-dependent transcription factor ATF-2 OS=Homo sapiens GN=ATF2 PE=1 SV=4	1	1	1	1	1	1	0	0	0	0	1	1	0	1	0	0	0	0	0	0	1	1	0	0	0	0	1	1	0	1	0	0	0	0	0	0	1	1	0	0	0	0
P15374	P15374	3	3	3	Ubiquitin carboxyl-terminal hydrolase isozyme L3	UCHL3	sp|P15374|UCHL3_HUMAN Ubiquitin carboxyl-terminal hydrolase isozyme L3 OS=Homo sapiens GN=UCHL3 PE=1 SV=1	1	3	3	3	1	1	1	0	0	0	1	1	2	1	0	0	2	0	1	0	1	1	1	0	0	0	1	1	2	1	0	0	2	0	1	0	1	1	1	0	0	0
P15407	P15407	3	3	3	Fos-related antigen 1	FOSL1	sp|P15407|FOSL1_HUMAN Fos-related antigen 1 OS=Homo sapiens GN=FOSL1 PE=1 SV=1	1	3	3	3	2	1	0	0	1	0	0	1	0	1	1	1	1	0	0	0	2	1	0	0	1	0	0	1	0	1	1	1	1	0	0	0	2	1	0	0	1	0
P15408	P15408	2	2	2	Fos-related antigen 2	FOSL2	sp|P15408|FOSL2_HUMAN Fos-related antigen 2 OS=Homo sapiens GN=FOSL2 PE=1 SV=1	1	2	2	2	0	0	0	0	1	0	0	1	0	1	0	0	0	0	0	0	0	0	0	0	1	0	0	1	0	1	0	0	0	0	0	0	0	0	0	0	1	0
P15531	P15531	2	2	2	Nucleoside diphosphate kinase A	NME1	sp|P15531|NDKA_HUMAN Nucleoside diphosphate kinase A OS=Homo sapiens GN=NME1 PE=1 SV=1	1	2	2	2	1	1	1	1	1	1	1	0	1	1	1	1	1	2	1	0	1	1	1	1	1	1	1	0	1	1	1	1	1	2	1	0	1	1	1	1	1	1
P15559	P15559	4	4	4	NAD(P)H dehydrogenase [quinone] 1	NQO1	sp|P15559|NQO1_HUMAN NAD(P)H dehydrogenase [quinone] 1 OS=Homo sapiens GN=NQO1 PE=1 SV=1	1	4	4	4	3	2	2	4	1	2	2	2	4	4	1	1	2	3	0	2	3	2	2	4	1	2	2	2	4	4	1	1	2	3	0	2	3	2	2	4	1	2
P15586	P15586	2	2	2	N-acetylglucosamine-6-sulfatase	GNS	sp|P15586|GNS_HUMAN N-acetylglucosamine-6-sulfatase OS=Homo sapiens GN=GNS PE=1 SV=3	1	2	2	2	1	1	1	1	0	0	1	1	1	1	1	2	1	0	2	0	1	1	1	1	0	0	1	1	1	1	1	2	1	0	2	0	1	1	1	1	0	0
P15880	P15880	2	2	2	40S ribosomal protein S2	RPS2	sp|P15880|RS2_HUMAN 40S ribosomal protein S2 OS=Homo sapiens GN=RPS2 PE=1 SV=2	1	2	2	2	0	1	0	0	0	0	1	1	0	0	0	0	1	0	0	1	0	1	0	0	0	0	1	1	0	0	0	0	1	0	0	1	0	1	0	0	0	0
P15924	P15924	5	5	4	Desmoplakin	DSP	sp|P15924|DESP_HUMAN Desmoplakin OS=Homo sapiens GN=DSP PE=1 SV=3	1	5	5	4	0	0	0	0	2	1	0	0	0	0	0	1	3	3	2	0	0	0	0	0	2	1	0	0	0	0	0	1	3	3	2	0	0	0	0	0	2	1
P15927	P15927	5	5	5	Replication protein A 32 kDa subunit	RPA2	sp|P15927|RFA2_HUMAN Replication protein A 32 kDa subunit OS=Homo sapiens GN=RPA2 PE=1 SV=1	1	5	5	5	3	3	1	3	0	2	3	5	1	1	1	2	2	1	2	0	3	3	1	3	0	2	3	5	1	1	1	2	2	1	2	0	3	3	1	3	0	2
P16035	P16035	2	2	2	Metalloproteinase inhibitor 2	TIMP2	sp|P16035|TIMP2_HUMAN Metalloproteinase inhibitor 2 OS=Homo sapiens GN=TIMP2 PE=1 SV=2	1	2	2	2	1	0	1	1	1	1	2	1	1	2	1	1	2	0	1	1	1	0	1	1	1	1	2	1	1	2	1	1	2	0	1	1	1	0	1	1	1	1
P16070	P16070	5	5	5	CD44 antigen	CD44	sp|P16070|CD44_HUMAN CD44 antigen OS=Homo sapiens GN=CD44 PE=1 SV=3	1	5	5	5	3	3	2	3	2	2	2	2	4	3	2	2	3	2	3	0	3	3	2	3	2	2	2	2	4	3	2	2	3	2	3	0	3	3	2	3	2	2
Q8IUE6;P16104;Q96QV6	Q8IUE6;P16104;Q96QV6	2;2;1	2;2;1	1;1;1	Histone H2A type 2-B;Histone H2AX;Histone H2A type 1-A	HIST2H2AB;H2AFX;HIST1H2AA	sp|Q8IUE6|H2A2B_HUMAN Histone H2A type 2-B OS=Homo sapiens GN=HIST2H2AB PE=1 SV=3;sp|P16104|H2AX_HUMAN Histone H2AX OS=Homo sapiens GN=H2AFX PE=1 SV=2;sp|Q96QV6|H2A1A_HUMAN Histone H2A type 1-A OS=Homo sapiens GN=HIST1H2AA PE=1 SV=3	3	2	2	1	2	2	2	2	2	2	1	1	2	1	1	1	2	2	1	1	2	2	2	2	2	2	1	1	2	1	1	1	2	2	1	1	1	1	1	1	1	1
P16152	P16152	1	1	1	Carbonyl reductase [NADPH] 1	CBR1	sp|P16152|CBR1_HUMAN Carbonyl reductase [NADPH] 1 OS=Homo sapiens GN=CBR1 PE=1 SV=3	1	1	1	1	1	1	1	0	1	1	1	1	1	1	0	1	1	1	1	0	1	1	1	0	1	1	1	1	1	1	0	1	1	1	1	0	1	1	1	0	1	1
P16220	P16220	3	3	3	Cyclic AMP-responsive element-binding protein 1	CREB1	sp|P16220|CREB1_HUMAN Cyclic AMP-responsive element-binding protein 1 OS=Homo sapiens GN=CREB1 PE=1 SV=2	1	3	3	3	2	2	0	0	1	0	1	1	0	0	0	0	0	1	0	0	2	2	0	0	1	0	1	1	0	0	0	0	0	1	0	0	2	2	0	0	1	0
P16234	P16234	1	1	1	Platelet-derived growth factor receptor alpha	PDGFRA	sp|P16234|PGFRA_HUMAN Platelet-derived growth factor receptor alpha OS=Homo sapiens GN=PDGFRA PE=1 SV=1	1	1	1	1	0	0	1	1	0	0	0	0	0	0	0	0	0	0	0	0	0	0	1	1	0	0	0	0	0	0	0	0	0	0	0	0	0	0	1	1	0	0
P16333	P16333	4	4	4	Cytoplasmic protein NCK1	NCK1	sp|P16333|NCK1_HUMAN Cytoplasmic protein NCK1 OS=Homo sapiens GN=NCK1 PE=1 SV=1	1	4	4	4	0	1	1	0	0	0	0	0	3	1	0	0	1	0	0	0	0	1	1	0	0	0	0	0	3	1	0	0	1	0	0	0	0	1	1	0	0	0
P16401	P16401	1	1	1	Histone H1.5	HIST1H1B	sp|P16401|H15_HUMAN Histone H1.5 OS=Homo sapiens GN=HIST1H1B PE=1 SV=3	1	1	1	1	0	0	1	1	1	0	0	0	1	0	1	1	0	0	1	0	0	0	1	1	1	0	0	0	1	0	1	1	0	0	1	0	0	0	1	1	1	0
P16403	P16403	1	1	1	Histone H1.2	HIST1H1C	sp|P16403|H12_HUMAN Histone H1.2 OS=Homo sapiens GN=HIST1H1C PE=1 SV=2	1	1	1	1	0	0	0	0	0	0	0	0	0	0	1	1	0	0	0	0	0	0	0	0	0	0	0	0	0	0	1	1	0	0	0	0	0	0	0	0	0	0
P16435	P16435	7	7	7	NADPH--cytochrome P450 reductase	POR	sp|P16435|NCPR_HUMAN NADPH--cytochrome P450 reductase OS=Homo sapiens GN=POR PE=1 SV=2	1	7	7	7	5	5	3	5	3	3	7	7	4	4	3	2	5	4	5	3	5	5	3	5	3	3	7	7	4	4	3	2	5	4	5	3	5	5	3	5	3	3
P16615;O14983;Q93084	P16615	12;2;2	12;2;2	12;2;2	Sarcoplasmic/endoplasmic reticulum calcium ATPase 2	ATP2A2	sp|P16615|AT2A2_HUMAN Sarcoplasmic/endoplasmic reticulum calcium ATPase 2 OS=Homo sapiens GN=ATP2A2 PE=1 SV=1	3	12	12	12	5	6	6	7	3	7	7	7	6	6	4	5	9	6	3	3	5	6	6	7	3	7	7	7	6	6	4	5	9	6	3	3	5	6	6	7	3	7
P16871	P16871	1	1	1	Interleukin-7 receptor subunit alpha	IL7R	sp|P16871|IL7RA_HUMAN Interleukin-7 receptor subunit alpha OS=Homo sapiens GN=IL7R PE=1 SV=2	1	1	1	1	0	1	1	1	0	1	0	0	0	0	0	0	0	0	0	0	0	1	1	1	0	1	0	0	0	0	0	0	0	0	0	0	0	1	1	1	0	1
P16989	P16989	5	4	4	Y-box-binding protein 3	YBX3	sp|P16989|YBOX3_HUMAN Y-box-binding protein 3 OS=Homo sapiens GN=YBX3 PE=1 SV=4	1	5	4	4	5	5	4	5	5	4	5	4	4	5	3	4	5	1	3	0	4	4	3	4	4	3	4	3	3	4	3	4	4	0	3	0	4	4	3	4	4	3
P17028	P17028	4	4	4	Zinc finger protein 24	ZNF24	sp|P17028|ZNF24_HUMAN Zinc finger protein 24 OS=Homo sapiens GN=ZNF24 PE=1 SV=4	1	4	4	4	2	3	2	3	2	2	2	2	2	2	2	0	1	0	2	0	2	3	2	3	2	2	2	2	2	2	2	0	1	0	2	0	2	3	2	3	2	2
P17029	P17029	1	1	1	Zinc finger protein with KRAB and SCAN domains 1	ZKSCAN1	sp|P17029|ZKSC1_HUMAN Zinc finger protein with KRAB and SCAN domains 1 OS=Homo sapiens GN=ZKSCAN1 PE=1 SV=3	1	1	1	1	0	0	0	1	0	0	1	0	1	0	0	0	0	0	0	0	0	0	0	1	0	0	1	0	1	0	0	0	0	0	0	0	0	0	0	1	0	0
P17050	P17050	1	1	1	Alpha-N-acetylgalactosaminidase	NAGA	sp|P17050|NAGAB_HUMAN Alpha-N-acetylgalactosaminidase OS=Homo sapiens GN=NAGA PE=1 SV=2	1	1	1	1	0	0	0	0	0	0	1	1	1	1	0	0	0	0	0	0	0	0	0	0	0	0	1	1	1	1	0	0	0	0	0	0	0	0	0	0	0	0
P17066	P17066	4	2	2	Heat shock 70 kDa protein 6	HSPA6	sp|P17066|HSP76_HUMAN Heat shock 70 kDa protein 6 OS=Homo sapiens GN=HSPA6 PE=1 SV=2	1	4	2	2	0	1	2	2	2	3	3	2	2	1	2	2	3	2	2	0	0	0	1	1	1	2	1	1	1	1	1	1	1	1	1	0	0	0	1	1	1	2
P17174	P17174	7	7	7	Aspartate aminotransferase, cytoplasmic	GOT1	sp|P17174|AATC_HUMAN Aspartate aminotransferase, cytoplasmic OS=Homo sapiens GN=GOT1 PE=1 SV=3	1	7	7	7	5	3	3	2	0	2	5	3	3	4	1	3	3	2	2	2	5	3	3	2	0	2	5	3	3	4	1	3	3	2	2	2	5	3	3	2	0	2
P17252;P05771	P17252	8;3	8;3	7;2	Protein kinase C alpha type	PRKCA	sp|P17252|KPCA_HUMAN Protein kinase C alpha type OS=Homo sapiens GN=PRKCA PE=1 SV=4	2	8	8	7	1	3	1	1	3	3	2	6	3	2	1	2	3	5	1	2	1	3	1	1	3	3	2	6	3	2	1	2	3	5	1	2	1	3	1	1	3	3
P17275	P17275	1	1	1	Transcription factor jun-B	JUNB	sp|P17275|JUNB_HUMAN Transcription factor jun-B OS=Homo sapiens GN=JUNB PE=1 SV=1	1	1	1	1	0	0	0	1	0	0	0	0	0	1	0	0	0	0	0	0	0	0	0	1	0	0	0	0	0	1	0	0	0	0	0	0	0	0	0	1	0	0
P17301	P17301	5	5	5	Integrin alpha-2	ITGA2	sp|P17301|ITA2_HUMAN Integrin alpha-2 OS=Homo sapiens GN=ITGA2 PE=1 SV=1	1	5	5	5	1	1	3	4	1	1	3	3	3	3	1	1	2	2	2	0	1	1	3	4	1	1	3	3	3	3	1	1	2	2	2	0	1	1	3	4	1	1
P17302	P17302	3	3	3	Gap junction alpha-1 protein	GJA1	sp|P17302|CXA1_HUMAN Gap junction alpha-1 protein OS=Homo sapiens GN=GJA1 PE=1 SV=2	1	3	3	3	1	1	2	3	0	0	2	0	2	2	0	0	1	1	1	0	1	1	2	3	0	0	2	0	2	2	0	0	1	1	1	0	1	1	2	3	0	0
P17535	P17535	3	3	3	Transcription factor jun-D	JUND	sp|P17535|JUND_HUMAN Transcription factor jun-D OS=Homo sapiens GN=JUND PE=1 SV=3	1	3	3	3	1	1	1	3	0	0	2	2	1	0	1	1	2	1	0	0	1	1	1	3	0	0	2	2	1	0	1	1	2	1	0	0	1	1	1	3	0	0
P17544	P17544	1	1	1	Cyclic AMP-dependent transcription factor ATF-7	ATF7	sp|P17544|ATF7_HUMAN Cyclic AMP-dependent transcription factor ATF-7 OS=Homo sapiens GN=ATF7 PE=1 SV=2	1	1	1	1	1	1	0	1	0	0	1	0	1	1	0	0	1	0	0	0	1	1	0	1	0	0	1	0	1	1	0	0	1	0	0	0	1	1	0	1	0	0
P17568	P17568	1	1	1	NADH dehydrogenase [ubiquinone] 1 beta subcomplex subunit 7	NDUFB7	sp|P17568|NDUB7_HUMAN NADH dehydrogenase [ubiquinone] 1 beta subcomplex subunit 7 OS=Homo sapiens GN=NDUFB7 PE=1 SV=4	1	1	1	1	1	1	1	1	1	1	1	1	1	1	1	0	1	1	1	0	1	1	1	1	1	1	1	1	1	1	1	0	1	1	1	0	1	1	1	1	1	1
P17612	P17612	5	5	2	cAMP-dependent protein kinase catalytic subunit alpha	PRKACA	sp|P17612|KAPCA_HUMAN cAMP-dependent protein kinase catalytic subunit alpha OS=Homo sapiens GN=PRKACA PE=1 SV=2	1	5	5	2	3	2	2	0	2	2	1	2	2	2	1	2	0	2	0	1	3	2	2	0	2	2	1	2	2	2	1	2	0	2	0	1	1	0	1	0	1	1
P17655	P17655	16	16	16	Calpain-2 catalytic subunit	CAPN2	sp|P17655|CAN2_HUMAN Calpain-2 catalytic subunit OS=Homo sapiens GN=CAPN2 PE=1 SV=6	1	16	16	16	12	10	7	8	7	7	11	7	9	9	6	6	10	8	7	1	12	10	7	8	7	7	11	7	9	9	6	6	10	8	7	1	12	10	7	8	7	7
P17676	P17676	2	2	2	CCAAT/enhancer-binding protein beta	CEBPB	sp|P17676|CEBPB_HUMAN CCAAT/enhancer-binding protein beta OS=Homo sapiens GN=CEBPB PE=1 SV=2	1	2	2	2	1	0	0	1	0	0	1	0	0	1	0	1	1	0	0	0	1	0	0	1	0	0	1	0	0	1	0	1	1	0	0	0	1	0	0	1	0	0
P17706	P17706	2	2	2	Tyrosine-protein phosphatase non-receptor type 2	PTPN2	sp|P17706|PTN2_HUMAN Tyrosine-protein phosphatase non-receptor type 2 OS=Homo sapiens GN=PTPN2 PE=1 SV=2	1	2	2	2	0	1	0	0	0	0	1	0	1	0	0	0	1	0	0	1	0	1	0	0	0	0	1	0	1	0	0	0	1	0	0	1	0	1	0	0	0	0
P17707	P17707	1	1	1	S-adenosylmethionine decarboxylase proenzyme;S-adenosylmethionine decarboxylase alpha chain;S-adenosylmethionine decarboxylase beta chain	AMD1	sp|P17707|DCAM_HUMAN S-adenosylmethionine decarboxylase proenzyme OS=Homo sapiens GN=AMD1 PE=1 SV=2	1	1	1	1	0	0	0	0	0	0	0	0	0	1	0	0	0	0	0	0	0	0	0	0	0	0	0	0	0	1	0	0	0	0	0	0	0	0	0	0	0	0
P17812	P17812	8	8	8	CTP synthase 1	CTPS1	sp|P17812|PYRG1_HUMAN CTP synthase 1 OS=Homo sapiens GN=CTPS1 PE=1 SV=2	1	8	8	8	5	3	4	3	2	2	5	6	4	5	1	2	5	3	2	1	5	3	4	3	2	2	5	6	4	5	1	2	5	3	2	1	5	3	4	3	2	2
P17813	P17813	4	4	4	Endoglin	ENG	sp|P17813|EGLN_HUMAN Endoglin OS=Homo sapiens GN=ENG PE=1 SV=2	1	4	4	4	1	1	1	1	2	1	1	1	2	1	1	1	1	2	0	1	1	1	1	1	2	1	1	1	2	1	1	1	1	2	0	1	1	1	1	1	2	1
P17844	P17844	4	4	4	Probable ATP-dependent RNA helicase DDX5	DDX5	sp|P17844|DDX5_HUMAN Probable ATP-dependent RNA helicase DDX5 OS=Homo sapiens GN=DDX5 PE=1 SV=1	1	4	4	4	2	3	1	2	2	2	3	3	2	2	2	2	3	3	2	3	2	3	1	2	2	2	3	3	2	2	2	2	3	3	2	3	2	3	1	2	2	2
P17858	P17858	5	5	5	ATP-dependent 6-phosphofructokinase, liver type	PFKL	sp|P17858|PFKAL_HUMAN ATP-dependent 6-phosphofructokinase, liver type OS=Homo sapiens GN=PFKL PE=1 SV=6	1	5	5	5	3	2	2	2	0	0	3	3	1	2	0	1	1	2	0	1	3	2	2	2	0	0	3	3	1	2	0	1	1	2	0	1	3	2	2	2	0	0
P17900	P17900	2	2	2	Ganglioside GM2 activator;Ganglioside GM2 activator isoform short	GM2A	sp|P17900|SAP3_HUMAN Ganglioside GM2 activator OS=Homo sapiens GN=GM2A PE=1 SV=4	1	2	2	2	0	0	1	1	0	1	1	0	0	1	0	1	0	0	0	1	0	0	1	1	0	1	1	0	0	1	0	1	0	0	0	1	0	0	1	1	0	1
P17936	P17936	1	1	1	Insulin-like growth factor-binding protein 3	IGFBP3	sp|P17936|IBP3_HUMAN Insulin-like growth factor-binding protein 3 OS=Homo sapiens GN=IGFBP3 PE=1 SV=2	1	1	1	1	1	1	0	1	1	0	1	0	1	0	1	1	1	0	0	0	1	1	0	1	1	0	1	0	1	0	1	1	1	0	0	0	1	1	0	1	1	0
P17980	P17980	5	5	5	26S protease regulatory subunit 6A	PSMC3	sp|P17980|PRS6A_HUMAN 26S protease regulatory subunit 6A OS=Homo sapiens GN=PSMC3 PE=1 SV=3	1	5	5	5	3	2	3	4	1	1	4	2	5	4	1	2	3	2	1	1	3	2	3	4	1	1	4	2	5	4	1	2	3	2	1	1	3	2	3	4	1	1
P17987	P17987	6	6	6	T-complex protein 1 subunit alpha	TCP1	sp|P17987|TCPA_HUMAN T-complex protein 1 subunit alpha OS=Homo sapiens GN=TCP1 PE=1 SV=1	1	6	6	6	4	5	3	2	4	3	6	5	5	5	1	2	4	5	1	0	4	5	3	2	4	3	6	5	5	5	1	2	4	5	1	0	4	5	3	2	4	3
P18031	P18031	5	5	5	Tyrosine-protein phosphatase non-receptor type 1	PTPN1	sp|P18031|PTN1_HUMAN Tyrosine-protein phosphatase non-receptor type 1 OS=Homo sapiens GN=PTPN1 PE=1 SV=1	1	5	5	5	2	2	1	2	1	1	2	4	3	1	0	1	4	3	2	1	2	2	1	2	1	1	2	4	3	1	0	1	4	3	2	1	2	2	1	2	1	1
P18074	P18074	4	4	4	TFIIH basal transcription factor complex helicase XPD subunit	ERCC2	sp|P18074|ERCC2_HUMAN TFIIH basal transcription factor complex helicase XPD subunit OS=Homo sapiens GN=ERCC2 PE=1 SV=1	1	4	4	4	2	2	2	2	2	1	3	1	2	2	1	1	2	0	1	0	2	2	2	2	2	1	3	1	2	2	1	1	2	0	1	0	2	2	2	2	2	1
P18084	P18084	3	3	3	Integrin beta-5	ITGB5	sp|P18084|ITB5_HUMAN Integrin beta-5 OS=Homo sapiens GN=ITGB5 PE=1 SV=1	1	3	3	3	1	2	3	2	0	0	2	0	2	2	0	0	0	0	0	0	1	2	3	2	0	0	2	0	2	2	0	0	0	0	0	0	1	2	3	2	0	0
P18085	P18085	3	1	1	ADP-ribosylation factor 4	ARF4	sp|P18085|ARF4_HUMAN ADP-ribosylation factor 4 OS=Homo sapiens GN=ARF4 PE=1 SV=3	1	3	1	1	2	1	3	2	2	2	1	1	2	3	1	2	2	3	3	2	1	0	1	1	1	1	0	0	1	1	0	1	1	1	1	0	1	0	1	1	1	1
P18124	P18124	1	1	1	60S ribosomal protein L7	RPL7	sp|P18124|RL7_HUMAN 60S ribosomal protein L7 OS=Homo sapiens GN=RPL7 PE=1 SV=1	1	1	1	1	0	0	0	0	0	0	0	0	1	0	0	0	0	0	0	0	0	0	0	0	0	0	0	0	1	0	0	0	0	0	0	0	0	0	0	0	0	0
P18206	P18206	11	11	11	Vinculin	VCL	sp|P18206|VINC_HUMAN Vinculin OS=Homo sapiens GN=VCL PE=1 SV=4	1	11	11	11	6	8	5	5	4	4	7	10	8	8	4	3	5	7	1	3	6	8	5	5	4	4	7	10	8	8	4	3	5	7	1	3	6	8	5	5	4	4
P18465;P30485;P30481;P03989;Q31610;Q04826;P30486;P30480;P30479;P30461;P30460;P01889	P18465;P30485;P30481;P03989;Q31610;Q04826;P30486;P30480;P30479;P30461;P30460;P01889	6;5;5;5;4;4;4;4;4;4;4;4	4;4;4;4;3;3;3;3;3;3;3;3	1;1;1;1;1;1;1;1;1;1;1;1	HLA class I histocompatibility antigen, B-57 alpha chain;HLA class I histocompatibility antigen, B-47 alpha chain;HLA class I histocompatibility antigen, B-44 alpha chain;HLA class I histocompatibility antigen, B-27 alpha chain;HLA class I histocompatibility antigen, B-81 alpha chain;HLA class I histocompatibility antigen, B-40 alpha chain;HLA class I histocompatibility antigen, B-48 alpha chain;…	HLA-B	sp|P18465|1B57_HUMAN HLA class I histocompatibility antigen, B-57 alpha chain OS=Homo sapiens GN=HLA-B PE=1 SV=1;sp|P30485|1B47_HUMAN HLA class I histocompatibility antigen, B-47 alpha chain OS=Homo sapiens GN=HLA-B PE=1 SV=1;sp|P30481|1B44_HUMAN HLA class	12	6	4	1	3	2	3	3	2	2	3	3	4	4	3	2	3	4	3	2	2	1	2	3	1	1	2	2	3	3	1	1	2	2	2	1	1	1	1	1	1	1
P18583	P18583	12	12	12	Protein SON	SON	sp|P18583|SON_HUMAN Protein SON OS=Homo sapiens GN=SON PE=1 SV=4	1	12	12	12	7	7	7	7	5	5	7	7	8	5	7	7	6	4	3	1	7	7	7	7	5	5	7	7	8	5	7	7	6	4	3	1	7	7	7	7	5	5
P18615	P18615	3	3	3	Negative elongation factor E	NELFE	sp|P18615|NELFE_HUMAN Negative elongation factor E OS=Homo sapiens GN=NELFE PE=1 SV=3	1	3	3	3	1	1	1	1	1	1	1	0	2	2	1	1	1	1	1	0	1	1	1	1	1	1	1	0	2	2	1	1	1	1	1	0	1	1	1	1	1	1
P18621	P18621	1	1	1	60S ribosomal protein L17	RPL17	sp|P18621|RL17_HUMAN 60S ribosomal protein L17 OS=Homo sapiens GN=RPL17 PE=1 SV=3	1	1	1	1	1	1	1	1	0	1	1	1	1	1	0	0	1	1	0	0	1	1	1	1	0	1	1	1	1	1	0	0	1	1	0	0	1	1	1	1	0	1
P18669;Q8N0Y7;P15259	P18669	6;2;1	6;2;1	6;2;1	Phosphoglycerate mutase 1	PGAM1	sp|P18669|PGAM1_HUMAN Phosphoglycerate mutase 1 OS=Homo sapiens GN=PGAM1 PE=1 SV=2	3	6	6	6	4	2	3	3	3	3	2	4	3	5	1	3	4	5	2	1	4	2	3	3	3	3	2	4	3	5	1	3	4	5	2	1	4	2	3	3	3	3
P18754	P18754	4	4	4	Regulator of chromosome condensation	RCC1	sp|P18754|RCC1_HUMAN Regulator of chromosome condensation OS=Homo sapiens GN=RCC1 PE=1 SV=1	1	4	4	4	3	3	3	3	2	3	3	3	3	3	3	2	3	3	3	0	3	3	3	3	2	3	3	3	3	3	3	2	3	3	3	0	3	3	3	3	2	3
P18827	P18827	1	1	1	Syndecan-1	SDC1	sp|P18827|SDC1_HUMAN Syndecan-1 OS=Homo sapiens GN=SDC1 PE=1 SV=3	1	1	1	1	1	1	1	1	1	0	1	1	1	1	1	1	1	1	0	0	1	1	1	1	1	0	1	1	1	1	1	1	1	1	0	0	1	1	1	1	1	0
P18846	P18846	1	1	1	Cyclic AMP-dependent transcription factor ATF-1	ATF1	sp|P18846|ATF1_HUMAN Cyclic AMP-dependent transcription factor ATF-1 OS=Homo sapiens GN=ATF1 PE=1 SV=2	1	1	1	1	0	0	0	0	0	0	0	1	1	0	0	0	0	0	0	0	0	0	0	0	0	0	0	1	1	0	0	0	0	0	0	0	0	0	0	0	0	0
P18858	P18858	6	6	6	DNA ligase 1	LIG1	sp|P18858|DNLI1_HUMAN DNA ligase 1 OS=Homo sapiens GN=LIG1 PE=1 SV=1	1	6	6	6	2	2	1	1	1	0	3	1	4	5	0	0	2	1	1	0	2	2	1	1	1	0	3	1	4	5	0	0	2	1	1	0	2	2	1	1	1	0
P18859	P18859	3	3	3	ATP synthase-coupling factor 6, mitochondrial	ATP5J	sp|P18859|ATP5J_HUMAN ATP synthase-coupling factor 6, mitochondrial OS=Homo sapiens GN=ATP5J PE=1 SV=1	1	3	3	3	2	2	2	2	2	2	2	3	2	2	2	2	2	1	1	1	2	2	2	2	2	2	2	3	2	2	2	2	2	1	1	1	2	2	2	2	2	2
P19021	P19021	3	3	3	Peptidyl-glycine alpha-amidating monooxygenase;Peptidylglycine alpha-hydroxylating monooxygenase;Peptidyl-alpha-hydroxyglycine alpha-amidating lyase	PAM	sp|P19021|AMD_HUMAN Peptidyl-glycine alpha-amidating monooxygenase OS=Homo sapiens GN=PAM PE=1 SV=2	1	3	3	3	1	1	2	2	0	1	1	1	1	1	0	1	1	0	0	0	1	1	2	2	0	1	1	1	1	1	0	1	1	0	0	0	1	1	2	2	0	1
P19022	P19022	8	8	8	Cadherin-2	CDH2	sp|P19022|CADH2_HUMAN Cadherin-2 OS=Homo sapiens GN=CDH2 PE=1 SV=4	1	8	8	8	4	4	4	3	4	4	6	8	4	3	4	5	4	4	4	1	4	4	4	3	4	4	6	8	4	3	4	5	4	4	4	1	4	4	4	3	4	4
P19105	P19105	4	1	1	Myosin regulatory light chain 12A	MYL12A	sp|P19105|ML12A_HUMAN Myosin regulatory light chain 12A OS=Homo sapiens GN=MYL12A PE=1 SV=2	1	4	1	1	4	4	4	4	4	4	4	3	3	4	2	2	3	3	2	2	1	1	1	1	1	1	1	1	1	1	0	0	1	1	0	1	1	1	1	1	1	1
P19174	P19174	8	8	8	1-phosphatidylinositol 4,5-bisphosphate phosphodiesterase gamma-1	PLCG1	sp|P19174|PLCG1_HUMAN 1-phosphatidylinositol 4,5-bisphosphate phosphodiesterase gamma-1 OS=Homo sapiens GN=PLCG1 PE=1 SV=1	1	8	8	8	1	4	2	3	2	1	2	1	5	5	0	3	4	2	4	0	1	4	2	3	2	1	2	1	5	5	0	3	4	2	4	0	1	4	2	3	2	1
P19256	P19256	1	1	1	Lymphocyte function-associated antigen 3	CD58	sp|P19256|LFA3_HUMAN Lymphocyte function-associated antigen 3 OS=Homo sapiens GN=CD58 PE=1 SV=1	1	1	1	1	0	0	0	0	0	0	0	1	1	1	0	0	0	1	0	0	0	0	0	0	0	0	0	1	1	1	0	0	0	1	0	0	0	0	0	0	0	0
P19338	P19338	6	6	6	Nucleolin	NCL	sp|P19338|NUCL_HUMAN Nucleolin OS=Homo sapiens GN=NCL PE=1 SV=3	1	6	6	6	3	3	4	2	4	3	2	2	3	2	2	4	2	2	2	1	3	3	4	2	4	3	2	2	3	2	2	4	2	2	2	1	3	3	4	2	4	3
P19367	P19367	5	5	5	Hexokinase-1	HK1	sp|P19367|HXK1_HUMAN Hexokinase-1 OS=Homo sapiens GN=HK1 PE=1 SV=3	1	5	5	5	2	1	2	2	1	2	2	2	3	3	2	2	2	3	3	0	2	1	2	2	1	2	2	2	3	3	2	2	2	3	3	0	2	1	2	2	1	2
P19387	P19387	5	5	5	DNA-directed RNA polymerase II subunit RPB3	POLR2C	sp|P19387|RPB3_HUMAN DNA-directed RNA polymerase II subunit RPB3 OS=Homo sapiens GN=POLR2C PE=1 SV=2	1	5	5	5	3	4	4	3	2	2	4	2	4	5	1	2	3	1	3	1	3	4	4	3	2	2	4	2	4	5	1	2	3	1	3	1	3	4	4	3	2	2
P19388	P19388	1	1	1	DNA-directed RNA polymerases I, II, and III subunit RPABC1	POLR2E	sp|P19388|RPAB1_HUMAN DNA-directed RNA polymerases I, II, and III subunit RPABC1 OS=Homo sapiens GN=POLR2E PE=1 SV=4	1	1	1	1	0	0	0	0	0	0	0	0	0	0	0	0	1	0	0	0	0	0	0	0	0	0	0	0	0	0	0	0	1	0	0	0	0	0	0	0	0	0
P19404	P19404	1	1	1	NADH dehydrogenase [ubiquinone] flavoprotein 2, mitochondrial	NDUFV2	sp|P19404|NDUV2_HUMAN NADH dehydrogenase [ubiquinone] flavoprotein 2, mitochondrial OS=Homo sapiens GN=NDUFV2 PE=1 SV=2	1	1	1	1	1	1	1	1	1	1	1	1	1	0	1	1	1	0	1	1	1	1	1	1	1	1	1	1	1	0	1	1	1	0	1	1	1	1	1	1	1	1
P19447	P19447	6	6	6	TFIIH basal transcription factor complex helicase XPB subunit	ERCC3	sp|P19447|ERCC3_HUMAN TFIIH basal transcription factor complex helicase XPB subunit OS=Homo sapiens GN=ERCC3 PE=1 SV=1	1	6	6	6	1	0	0	1	0	0	0	0	1	3	1	2	0	0	1	0	1	0	0	1	0	0	0	0	1	3	1	2	0	0	1	0	1	0	0	1	0	0
P19525	P19525	3	3	3	Interferon-induced, double-stranded RNA-activated protein kinase	EIF2AK2	sp|P19525|E2AK2_HUMAN Interferon-induced, double-stranded RNA-activated protein kinase OS=Homo sapiens GN=EIF2AK2 PE=1 SV=2	1	3	3	3	0	1	0	0	1	0	1	1	1	0	0	1	1	1	1	1	0	1	0	0	1	0	1	1	1	0	0	1	1	1	1	1	0	1	0	0	1	0
P19623	P19623	3	3	3	Spermidine synthase	SRM	sp|P19623|SPEE_HUMAN Spermidine synthase OS=Homo sapiens GN=SRM PE=1 SV=1	1	3	3	3	2	2	1	1	0	0	1	2	3	3	0	1	1	3	0	0	2	2	1	1	0	0	1	2	3	3	0	1	1	3	0	0	2	2	1	1	0	0
P19634	P19634	2	2	2	Sodium/hydrogen exchanger 1	SLC9A1	sp|P19634|SL9A1_HUMAN Sodium/hydrogen exchanger 1 OS=Homo sapiens GN=SLC9A1 PE=1 SV=2	1	2	2	2	1	1	1	2	1	0	2	0	2	2	0	0	0	0	1	0	1	1	1	2	1	0	2	0	2	2	0	0	0	0	1	0	1	1	1	2	1	0
P19784	P19784	4	4	4	Casein kinase II subunit alpha	CSNK2A2	sp|P19784|CSK22_HUMAN Casein kinase II subunit alpha OS=Homo sapiens GN=CSNK2A2 PE=1 SV=1	1	4	4	4	1	1	1	1	2	1	2	2	2	1	1	1	2	2	1	0	1	1	1	1	2	1	2	2	2	1	1	1	2	2	1	0	1	1	1	1	2	1
P19838	P19838	1	1	1	Nuclear factor NF-kappa-B p105 subunit;Nuclear factor NF-kappa-B p50 subunit	NFKB1	sp|P19838|NFKB1_HUMAN Nuclear factor NF-kappa-B p105 subunit OS=Homo sapiens GN=NFKB1 PE=1 SV=2	1	1	1	1	0	0	0	0	0	0	0	0	0	1	0	0	0	0	0	0	0	0	0	0	0	0	0	0	0	1	0	0	0	0	0	0	0	0	0	0	0	0
P20020;Q16720;Q01814	P20020	5;2;1	3;0;0	3;0;0	Plasma membrane calcium-transporting ATPase 1	ATP2B1	sp|P20020|AT2B1_HUMAN Plasma membrane calcium-transporting ATPase 1 OS=Homo sapiens GN=ATP2B1 PE=1 SV=3	3	5	3	3	1	2	2	2	0	1	3	3	3	2	1	1	2	4	2	0	1	2	2	2	0	1	3	2	2	1	1	1	1	2	2	0	1	2	2	2	0	1
P20042	P20042	6	6	6	Eukaryotic translation initiation factor 2 subunit 2	EIF2S2	sp|P20042|IF2B_HUMAN Eukaryotic translation initiation factor 2 subunit 2 OS=Homo sapiens GN=EIF2S2 PE=1 SV=2	1	6	6	6	4	5	6	6	3	5	6	4	6	6	5	5	6	3	3	1	4	5	6	6	3	5	6	4	6	6	5	5	6	3	3	1	4	5	6	6	3	5
P20073	P20073	2	2	2	Annexin A7	ANXA7	sp|P20073|ANXA7_HUMAN Annexin A7 OS=Homo sapiens GN=ANXA7 PE=1 SV=3	1	2	2	2	0	0	1	1	0	1	0	0	0	0	0	0	0	1	1	0	0	0	1	1	0	1	0	0	0	0	0	0	0	1	1	0	0	0	1	1	0	1
P20226;Q6SJ96	P20226;Q6SJ96	1;1	1;1	1;1	TATA-box-binding protein;TATA box-binding protein-like protein 2	TBP;TBPL2	sp|P20226|TBP_HUMAN TATA-box-binding protein OS=Homo sapiens GN=TBP PE=1 SV=2;sp|Q6SJ96|TBPL2_HUMAN TATA box-binding protein-like protein 2 OS=Homo sapiens GN=TBPL2 PE=2 SV=1	2	1	1	1	0	0	1	0	0	0	1	0	1	1	0	0	0	0	0	0	0	0	1	0	0	0	1	0	1	1	0	0	0	0	0	0	0	0	1	0	0	0
P20248	P20248	1	1	1	Cyclin-A2	CCNA2	sp|P20248|CCNA2_HUMAN Cyclin-A2 OS=Homo sapiens GN=CCNA2 PE=1 SV=2	1	1	1	1	0	0	0	0	0	0	0	1	0	1	0	0	0	0	0	0	0	0	0	0	0	0	0	1	0	1	0	0	0	0	0	0	0	0	0	0	0	0
P20290	P20290	4	4	4	Transcription factor BTF3	BTF3	sp|P20290|BTF3_HUMAN Transcription factor BTF3 OS=Homo sapiens GN=BTF3 PE=1 SV=1	1	4	4	4	3	3	4	2	1	2	3	3	3	4	2	2	3	3	3	1	3	3	4	2	1	2	3	3	3	4	2	2	3	3	3	1	3	3	4	2	1	2
P20337	P20337	2	2	2	Ras-related protein Rab-3B	RAB3B	sp|P20337|RAB3B_HUMAN Ras-related protein Rab-3B OS=Homo sapiens GN=RAB3B PE=1 SV=2	1	2	2	2	1	0	1	1	0	1	1	2	0	0	0	1	1	2	1	1	1	0	1	1	0	1	1	2	0	0	0	1	1	2	1	1	1	0	1	1	0	1
P20339	P20339	3	3	3	Ras-related protein Rab-5A	RAB5A	sp|P20339|RAB5A_HUMAN Ras-related protein Rab-5A OS=Homo sapiens GN=RAB5A PE=1 SV=2	1	3	3	3	0	0	1	0	0	0	0	2	0	1	0	0	1	1	0	0	0	0	1	0	0	0	0	2	0	1	0	0	1	1	0	0	0	0	1	0	0	0
P20340;Q9NRW1	P20340;Q9NRW1	2;1	2;1	2;1	Ras-related protein Rab-6A;Ras-related protein Rab-6B	RAB6A;RAB6B	sp|P20340|RAB6A_HUMAN Ras-related protein Rab-6A OS=Homo sapiens GN=RAB6A PE=1 SV=3;sp|Q9NRW1|RAB6B_HUMAN Ras-related protein Rab-6B OS=Homo sapiens GN=RAB6B PE=1 SV=1	2	2	2	2	2	2	2	2	2	1	2	2	1	2	1	1	2	2	1	0	2	2	2	2	2	1	2	2	1	2	1	1	2	2	1	0	2	2	2	2	2	1
P20585	P20585	4	4	4	DNA mismatch repair protein Msh3	MSH3	sp|P20585|MSH3_HUMAN DNA mismatch repair protein Msh3 OS=Homo sapiens GN=MSH3 PE=1 SV=4	1	4	4	4	1	1	0	0	0	0	2	0	3	1	0	0	0	0	0	0	1	1	0	0	0	0	2	0	3	1	0	0	0	0	0	0	1	1	0	0	0	0
P20618	P20618	2	2	2	Proteasome subunit beta type-1	PSMB1	sp|P20618|PSB1_HUMAN Proteasome subunit beta type-1 OS=Homo sapiens GN=PSMB1 PE=1 SV=2	1	2	2	2	1	1	1	1	0	1	1	2	0	0	0	0	1	0	1	1	1	1	1	1	0	1	1	2	0	0	0	0	1	0	1	1	1	1	1	1	0	1
P20645	P20645	3	3	3	Cation-dependent mannose-6-phosphate receptor	M6PR	sp|P20645|MPRD_HUMAN Cation-dependent mannose-6-phosphate receptor OS=Homo sapiens GN=M6PR PE=1 SV=1	1	3	3	3	1	2	2	2	1	2	2	2	2	2	2	2	3	2	2	0	1	2	2	2	1	2	2	2	2	2	2	2	3	2	2	0	1	2	2	2	1	2
P20674	P20674	2	2	2	Cytochrome c oxidase subunit 5A, mitochondrial	COX5A	sp|P20674|COX5A_HUMAN Cytochrome c oxidase subunit 5A, mitochondrial OS=Homo sapiens GN=COX5A PE=1 SV=2	1	2	2	2	1	1	2	2	1	1	2	2	2	1	1	2	2	1	1	0	1	1	2	2	1	1	2	2	2	1	1	2	2	1	1	0	1	1	2	2	1	1
P20700	P20700	10	10	10	Lamin-B1	LMNB1	sp|P20700|LMNB1_HUMAN Lamin-B1 OS=Homo sapiens GN=LMNB1 PE=1 SV=2	1	10	10	10	8	8	6	6	3	5	5	5	5	5	4	4	4	5	5	4	8	8	6	6	3	5	5	5	5	5	4	4	4	5	5	4	8	8	6	6	3	5
P20810	P20810	4	4	4	Calpastatin	CAST	sp|P20810|ICAL_HUMAN Calpastatin OS=Homo sapiens GN=CAST PE=1 SV=4	1	4	4	4	4	4	3	4	3	4	4	3	3	4	2	3	4	3	2	0	4	4	3	4	3	4	4	3	3	4	2	3	4	3	2	0	4	4	3	4	3	4
P20908	P20908	4	4	4	Collagen alpha-1(V) chain	COL5A1	sp|P20908|CO5A1_HUMAN Collagen alpha-1(V) chain OS=Homo sapiens GN=COL5A1 PE=1 SV=3	1	4	4	4	3	0	2	3	1	0	2	2	3	3	0	2	1	4	2	0	3	0	2	3	1	0	2	2	3	3	0	2	1	4	2	0	3	0	2	3	1	0
P20933	P20933	1	1	1	N(4)-(beta-N-acetylglucosaminyl)-L-asparaginase;Glycosylasparaginase alpha chain;Glycosylasparaginase beta chain	AGA	sp|P20933|ASPG_HUMAN N(4)-(beta-N-acetylglucosaminyl)-L-asparaginase OS=Homo sapiens GN=AGA PE=1 SV=2	1	1	1	1	0	0	0	0	1	0	1	0	0	0	1	0	1	0	1	0	0	0	0	0	1	0	1	0	0	0	1	0	1	0	1	0	0	0	0	0	1	0
P20936	P20936	2	2	2	Ras GTPase-activating protein 1	RASA1	sp|P20936|RASA1_HUMAN Ras GTPase-activating protein 1 OS=Homo sapiens GN=RASA1 PE=1 SV=1	1	2	2	2	1	1	1	0	0	0	1	0	1	1	0	0	1	0	0	0	1	1	1	0	0	0	1	0	1	1	0	0	1	0	0	0	1	1	1	0	0	0
Q9UQ88;P21127	Q9UQ88;P21127	1;1	1;1	1;1	Cyclin-dependent kinase 11A;Cyclin-dependent kinase 11B	CDK11A;CDK11B	sp|Q9UQ88|CD11A_HUMAN Cyclin-dependent kinase 11A OS=Homo sapiens GN=CDK11A PE=1 SV=4;sp|P21127|CD11B_HUMAN Cyclin-dependent kinase 11B OS=Homo sapiens GN=CDK11B PE=1 SV=3	2	1	1	1	1	0	0	0	0	0	0	1	0	0	0	0	0	0	0	0	1	0	0	0	0	0	0	1	0	0	0	0	0	0	0	0	1	0	0	0	0	0
P21266	P21266	1	1	1	Glutathione S-transferase Mu 3	GSTM3	sp|P21266|GSTM3_HUMAN Glutathione S-transferase Mu 3 OS=Homo sapiens GN=GSTM3 PE=1 SV=3	1	1	1	1	0	0	0	0	0	0	0	0	0	0	0	0	0	1	0	0	0	0	0	0	0	0	0	0	0	0	0	0	0	1	0	0	0	0	0	0	0	0
P21281	P21281	4	4	4	V-type proton ATPase subunit B, brain isoform	ATP6V1B2	sp|P21281|VATB2_HUMAN V-type proton ATPase subunit B, brain isoform OS=Homo sapiens GN=ATP6V1B2 PE=1 SV=3	1	4	4	4	1	2	1	1	0	0	2	2	3	3	0	0	0	1	0	0	1	2	1	1	0	0	2	2	3	3	0	0	0	1	0	0	1	2	1	1	0	0
P21283	P21283	2	2	2	V-type proton ATPase subunit C 1	ATP6V1C1	sp|P21283|VATC1_HUMAN V-type proton ATPase subunit C 1 OS=Homo sapiens GN=ATP6V1C1 PE=1 SV=4	1	2	2	2	1	1	0	0	0	0	1	1	1	1	0	0	0	0	0	1	1	1	0	0	0	0	1	1	1	1	0	0	0	0	0	1	1	1	0	0	0	0
P21291	P21291	1	1	1	Cysteine and glycine-rich protein 1	CSRP1	sp|P21291|CSRP1_HUMAN Cysteine and glycine-rich protein 1 OS=Homo sapiens GN=CSRP1 PE=1 SV=3	1	1	1	1	0	0	0	0	0	0	1	0	1	0	0	0	0	0	0	0	0	0	0	0	0	0	1	0	1	0	0	0	0	0	0	0	0	0	0	0	0	0
P21333	P21333	52	52	51	Filamin-A	FLNA	sp|P21333|FLNA_HUMAN Filamin-A OS=Homo sapiens GN=FLNA PE=1 SV=4	1	52	52	51	31	32	30	35	24	25	32	34	38	37	23	29	26	30	25	16	31	32	30	35	24	25	32	34	38	37	23	29	26	30	25	16	31	31	30	34	24	25
P21359	P21359	4	4	4	Neurofibromin;Neurofibromin truncated	NF1	sp|P21359|NF1_HUMAN Neurofibromin OS=Homo sapiens GN=NF1 PE=1 SV=2	1	4	4	4	0	0	2	2	0	0	2	0	3	2	0	0	0	0	0	0	0	0	2	2	0	0	2	0	3	2	0	0	0	0	0	0	0	0	2	2	0	0
P21397	P21397	2	2	2	Amine oxidase [flavin-containing] A	MAOA	sp|P21397|AOFA_HUMAN Amine oxidase [flavin-containing] A OS=Homo sapiens GN=MAOA PE=1 SV=1	1	2	2	2	1	0	1	1	0	0	0	1	1	1	0	0	1	0	1	1	1	0	1	1	0	0	0	1	1	1	0	0	1	0	1	1	1	0	1	1	0	0
P21399	P21399	8	8	8	Cytoplasmic aconitate hydratase	ACO1	sp|P21399|ACOC_HUMAN Cytoplasmic aconitate hydratase OS=Homo sapiens GN=ACO1 PE=1 SV=3	1	8	8	8	4	4	2	3	0	1	4	5	6	4	0	1	1	1	1	0	4	4	2	3	0	1	4	5	6	4	0	1	1	1	1	0	4	4	2	3	0	1
P21589	P21589	6	6	6	5-nucleotidase	NT5E	sp|P21589|5NTD_HUMAN 5-nucleotidase OS=Homo sapiens GN=NT5E PE=1 SV=1	1	6	6	6	4	5	3	4	3	2	4	5	4	4	3	2	3	4	1	0	4	5	3	4	3	2	4	5	4	4	3	2	3	4	1	0	4	5	3	4	3	2
P21675;Q8IZX4	P21675	4;1	4;1	4;1	Transcription initiation factor TFIID subunit 1	TAF1	sp|P21675|TAF1_HUMAN Transcription initiation factor TFIID subunit 1 OS=Homo sapiens GN=TAF1 PE=1 SV=2	2	4	4	4	1	1	0	0	0	0	2	0	2	1	0	0	1	0	0	0	1	1	0	0	0	0	2	0	2	1	0	0	1	0	0	0	1	1	0	0	0	0
P21796	P21796	9	9	9	Voltage-dependent anion-selective channel protein 1	VDAC1	sp|P21796|VDAC1_HUMAN Voltage-dependent anion-selective channel protein 1 OS=Homo sapiens GN=VDAC1 PE=1 SV=2	1	9	9	9	5	7	5	5	6	5	5	5	6	6	5	6	6	5	5	2	5	7	5	5	6	5	5	5	6	6	5	6	6	5	5	2	5	7	5	5	6	5
P21912	P21912	1	1	1	Succinate dehydrogenase [ubiquinone] iron-sulfur subunit, mitochondrial	SDHB	sp|P21912|SDHB_HUMAN Succinate dehydrogenase [ubiquinone] iron-sulfur subunit, mitochondrial OS=Homo sapiens GN=SDHB PE=1 SV=3	1	1	1	1	0	0	0	0	1	0	1	0	0	0	0	0	0	0	1	0	0	0	0	0	1	0	1	0	0	0	0	0	0	0	1	0	0	0	0	0	1	0
P21926	P21926	1	1	1	CD9 antigen	CD9	sp|P21926|CD9_HUMAN CD9 antigen OS=Homo sapiens GN=CD9 PE=1 SV=4	1	1	1	1	1	1	1	1	1	1	1	1	1	1	1	1	1	0	1	0	1	1	1	1	1	1	1	1	1	1	1	1	1	0	1	0	1	1	1	1	1	1
P21953	P21953	1	1	1	2-oxoisovalerate dehydrogenase subunit beta, mitochondrial	BCKDHB	sp|P21953|ODBB_HUMAN 2-oxoisovalerate dehydrogenase subunit beta, mitochondrial OS=Homo sapiens GN=BCKDHB PE=1 SV=2	1	1	1	1	0	0	0	0	0	0	1	0	0	0	0	0	0	0	0	0	0	0	0	0	0	0	1	0	0	0	0	0	0	0	0	0	0	0	0	0	0	0
P21964	P21964	4	4	4	Catechol O-methyltransferase	COMT	sp|P21964|COMT_HUMAN Catechol O-methyltransferase OS=Homo sapiens GN=COMT PE=1 SV=2	1	4	4	4	2	2	2	3	0	0	3	4	3	3	0	0	2	3	2	1	2	2	2	3	0	0	3	4	3	3	0	0	2	3	2	1	2	2	2	3	0	0
P21980	P21980	4	4	4	Protein-glutamine gamma-glutamyltransferase 2	TGM2	sp|P21980|TGM2_HUMAN Protein-glutamine gamma-glutamyltransferase 2 OS=Homo sapiens GN=TGM2 PE=1 SV=2	1	4	4	4	0	0	0	0	0	0	1	1	1	2	0	0	0	1	0	0	0	0	0	0	0	0	1	1	1	2	0	0	0	1	0	0	0	0	0	0	0	0
P22033	P22033	1	1	1	Methylmalonyl-CoA mutase, mitochondrial	MUT	sp|P22033|MUTA_HUMAN Methylmalonyl-CoA mutase, mitochondrial OS=Homo sapiens GN=MUT PE=1 SV=4	1	1	1	1	1	0	1	1	0	0	1	0	0	1	0	0	1	0	0	0	1	0	1	1	0	0	1	0	0	1	0	0	1	0	0	0	1	0	1	1	0	0
P22059	P22059	3	3	3	Oxysterol-binding protein 1	OSBP	sp|P22059|OSBP1_HUMAN Oxysterol-binding protein 1 OS=Homo sapiens GN=OSBP PE=1 SV=1	1	3	3	3	3	2	2	2	2	1	0	1	0	2	2	2	0	2	0	1	3	2	2	2	2	1	0	1	0	2	2	2	0	2	0	1	3	2	2	2	2	1
P22061	P22061	2	2	2	Protein-L-isoaspartate(D-aspartate) O-methyltransferase	PCMT1	sp|P22061|PIMT_HUMAN Protein-L-isoaspartate(D-aspartate) O-methyltransferase OS=Homo sapiens GN=PCMT1 PE=1 SV=4	1	2	2	2	0	0	1	1	0	0	1	1	2	2	0	0	1	0	1	0	0	0	1	1	0	0	1	1	2	2	0	0	1	0	1	0	0	0	1	1	0	0
P22087;A6NHQ2	P22087	5;1	5;1	5;1	rRNA 2-O-methyltransferase fibrillarin	FBL	sp|P22087|FBRL_HUMAN rRNA 2-O-methyltransferase fibrillarin OS=Homo sapiens GN=FBL PE=1 SV=2	2	5	5	5	0	1	2	2	0	0	2	4	2	2	0	0	0	1	0	1	0	1	2	2	0	0	2	4	2	2	0	0	0	1	0	1	0	1	2	2	0	0
P22102	P22102	10	10	10	Trifunctional purine biosynthetic protein adenosine-3;Phosphoribosylamine--glycine ligase;Phosphoribosylformylglycinamidine cyclo-ligase;Phosphoribosylglycinamide formyltransferase	GART	sp|P22102|PUR2_HUMAN Trifunctional purine biosynthetic protein adenosine-3 OS=Homo sapiens GN=GART PE=1 SV=1	1	10	10	10	7	9	4	5	3	2	6	7	4	3	2	2	5	7	2	0	7	9	4	5	3	2	6	7	4	3	2	2	5	7	2	0	7	9	4	5	3	2
P22234	P22234	6	6	6	Multifunctional protein ADE2;Phosphoribosylaminoimidazole-succinocarboxamide synthase;Phosphoribosylaminoimidazole carboxylase	PAICS	sp|P22234|PUR6_HUMAN Multifunctional protein ADE2 OS=Homo sapiens GN=PAICS PE=1 SV=3	1	6	6	6	5	6	4	5	3	3	5	5	5	6	2	3	4	5	2	3	5	6	4	5	3	3	5	5	5	6	2	3	4	5	2	3	5	6	4	5	3	3
P22307	P22307	7	7	7	Non-specific lipid-transfer protein	SCP2	sp|P22307|NLTP_HUMAN Non-specific lipid-transfer protein OS=Homo sapiens GN=SCP2 PE=1 SV=2	1	7	7	7	2	3	1	4	2	1	4	5	3	3	1	3	4	3	1	0	2	3	1	4	2	1	4	5	3	3	1	3	4	3	1	0	2	3	1	4	2	1
P22314	P22314	15	15	15	Ubiquitin-like modifier-activating enzyme 1	UBA1	sp|P22314|UBA1_HUMAN Ubiquitin-like modifier-activating enzyme 1 OS=Homo sapiens GN=UBA1 PE=1 SV=3	1	15	15	15	6	8	5	9	6	6	12	9	10	10	5	3	8	9	6	0	6	8	5	9	6	6	12	9	10	10	5	3	8	9	6	0	6	8	5	9	6	6
P22413	P22413	6	6	6	Ectonucleotide pyrophosphatase/phosphodiesterase family member 1;Alkaline phosphodiesterase I;Nucleotide pyrophosphatase	ENPP1	sp|P22413|ENPP1_HUMAN Ectonucleotide pyrophosphatase/phosphodiesterase family member 1 OS=Homo sapiens GN=ENPP1 PE=1 SV=2	1	6	6	6	1	2	3	2	2	0	3	3	3	4	2	1	2	1	1	0	1	2	3	2	2	0	3	3	3	4	2	1	2	1	1	0	1	2	3	2	2	0
P22415	P22415	1	1	1	Upstream stimulatory factor 1	USF1	sp|P22415|USF1_HUMAN Upstream stimulatory factor 1 OS=Homo sapiens GN=USF1 PE=1 SV=1	1	1	1	1	1	1	1	0	1	1	0	0	0	0	0	1	0	0	1	0	1	1	1	0	1	1	0	0	0	0	0	1	0	0	1	0	1	1	1	0	1	1
P22570	P22570	2	2	2	NADPH:adrenodoxin oxidoreductase, mitochondrial	FDXR	sp|P22570|ADRO_HUMAN NADPH:adrenodoxin oxidoreductase, mitochondrial OS=Homo sapiens GN=FDXR PE=1 SV=3	1	2	2	2	2	1	1	0	0	0	1	1	1	1	0	0	0	1	1	0	2	1	1	0	0	0	1	1	1	1	0	0	0	1	1	0	2	1	1	0	0	0
P22612	P22612	2	1	1	cAMP-dependent protein kinase catalytic subunit gamma	PRKACG	sp|P22612|KAPCG_HUMAN cAMP-dependent protein kinase catalytic subunit gamma OS=Homo sapiens GN=PRKACG PE=1 SV=3	1	2	1	1	2	2	2	1	1	1	0	1	2	2	0	1	1	1	0	0	1	1	1	1	0	1	0	1	1	1	0	0	1	0	0	0	1	1	1	1	0	1
P22626	P22626	9	9	9	Heterogeneous nuclear ribonucleoproteins A2/B1	HNRNPA2B1	sp|P22626|ROA2_HUMAN Heterogeneous nuclear ribonucleoproteins A2/B1 OS=Homo sapiens GN=HNRNPA2B1 PE=1 SV=2	1	9	9	9	7	6	5	3	2	2	7	4	5	4	3	3	3	2	2	1	7	6	5	3	2	2	7	4	5	4	3	3	3	2	2	1	7	6	5	3	2	2
P22670	P22670	3	3	3	MHC class II regulatory factor RFX1	RFX1	sp|P22670|RFX1_HUMAN MHC class II regulatory factor RFX1 OS=Homo sapiens GN=RFX1 PE=1 SV=2	1	3	3	3	0	0	0	0	0	0	2	0	2	0	0	0	0	0	1	0	0	0	0	0	0	0	2	0	2	0	0	0	0	0	1	0	0	0	0	0	0	0
P22681	P22681	3	3	3	E3 ubiquitin-protein ligase CBL	CBL	sp|P22681|CBL_HUMAN E3 ubiquitin-protein ligase CBL OS=Homo sapiens GN=CBL PE=1 SV=2	1	3	3	3	0	0	0	0	0	0	0	0	1	1	0	0	1	0	0	0	0	0	0	0	0	0	0	0	1	1	0	0	1	0	0	0	0	0	0	0	0	0
P22694	P22694	5	2	2	cAMP-dependent protein kinase catalytic subunit beta	PRKACB	sp|P22694|KAPCB_HUMAN cAMP-dependent protein kinase catalytic subunit beta OS=Homo sapiens GN=PRKACB PE=1 SV=2	1	5	2	2	3	2	2	1	2	2	2	1	2	2	0	3	0	2	0	0	1	0	1	1	1	1	1	0	1	1	0	1	0	0	0	0	1	0	1	1	1	1
P22695	P22695	7	7	7	Cytochrome b-c1 complex subunit 2, mitochondrial	UQCRC2	sp|P22695|QCR2_HUMAN Cytochrome b-c1 complex subunit 2, mitochondrial OS=Homo sapiens GN=UQCRC2 PE=1 SV=3	1	7	7	7	2	1	2	1	0	3	3	4	2	1	2	1	1	5	0	3	2	1	2	1	0	3	3	4	2	1	2	1	1	5	0	3	2	1	2	1	0	3
P23025	P23025	3	3	3	DNA repair protein complementing XP-A cells	XPA	sp|P23025|XPA_HUMAN DNA repair protein complementing XP-A cells OS=Homo sapiens GN=XPA PE=1 SV=1	1	3	3	3	1	1	2	3	1	1	3	0	1	3	0	0	1	0	1	0	1	1	2	3	1	1	3	0	1	3	0	0	1	0	1	0	1	1	2	3	1	1
P23193	P23193	2	2	2	Transcription elongation factor A protein 1	TCEA1	sp|P23193|TCEA1_HUMAN Transcription elongation factor A protein 1 OS=Homo sapiens GN=TCEA1 PE=1 SV=2	1	2	2	2	1	1	1	2	1	2	0	1	2	0	1	1	1	1	0	0	1	1	1	2	1	2	0	1	2	0	1	1	1	1	0	0	1	1	1	2	1	2
P23229	P23229	6	6	6	Integrin alpha-6;Integrin alpha-6 heavy chain;Integrin alpha-6 light chain;Processed integrin alpha-6	ITGA6	sp|P23229|ITA6_HUMAN Integrin alpha-6 OS=Homo sapiens GN=ITGA6 PE=1 SV=5	1	6	6	6	2	3	3	2	3	2	2	4	3	4	2	2	2	3	2	0	2	3	3	2	3	2	2	4	3	4	2	2	2	3	2	0	2	3	3	2	3	2
P23246	P23246	7	7	7	Splicing factor, proline- and glutamine-rich	SFPQ	sp|P23246|SFPQ_HUMAN Splicing factor, proline- and glutamine-rich OS=Homo sapiens GN=SFPQ PE=1 SV=2	1	7	7	7	4	4	2	3	3	4	4	7	2	2	3	3	3	4	4	0	4	4	2	3	3	4	4	7	2	2	3	3	3	4	4	0	4	4	2	3	3	4
P23258;Q9NRH3	P23258;Q9NRH3	9;7	9;7	9;7	Tubulin gamma-1 chain;Tubulin gamma-2 chain	TUBG1;TUBG2	sp|P23258|TBG1_HUMAN Tubulin gamma-1 chain OS=Homo sapiens GN=TUBG1 PE=1 SV=2;sp|Q9NRH3|TBG2_HUMAN Tubulin gamma-2 chain OS=Homo sapiens GN=TUBG2 PE=2 SV=1	2	9	9	9	5	6	7	6	0	1	7	7	7	5	0	5	7	7	4	3	5	6	7	6	0	1	7	7	7	5	0	5	7	7	4	3	5	6	7	6	0	1
P23368	P23368	6	6	6	NAD-dependent malic enzyme, mitochondrial	ME2	sp|P23368|MAOM_HUMAN NAD-dependent malic enzyme, mitochondrial OS=Homo sapiens GN=ME2 PE=1 SV=1	1	6	6	6	2	4	3	4	1	1	5	4	3	4	1	1	0	2	1	0	2	4	3	4	1	1	5	4	3	4	1	1	0	2	1	0	2	4	3	4	1	1
P23381	P23381	7	7	7	Tryptophan--tRNA ligase, cytoplasmic;T1-TrpRS;T2-TrpRS	WARS	sp|P23381|SYWC_HUMAN Tryptophan--tRNA ligase, cytoplasmic OS=Homo sapiens GN=WARS PE=1 SV=2	1	7	7	7	5	4	1	2	1	3	4	7	4	5	1	2	3	3	2	2	5	4	1	2	1	3	4	7	4	5	1	2	3	3	2	2	5	4	1	2	1	3
P23396	P23396	3	3	3	40S ribosomal protein S3	RPS3	sp|P23396|RS3_HUMAN 40S ribosomal protein S3 OS=Homo sapiens GN=RPS3 PE=1 SV=2	1	3	3	3	2	1	2	1	1	3	1	1	1	2	2	2	2	1	1	1	2	1	2	1	1	3	1	1	1	2	2	2	2	1	1	1	2	1	2	1	1	3
P23434	P23434	3	3	3	Glycine cleavage system H protein, mitochondrial	GCSH	sp|P23434|GCSH_HUMAN Glycine cleavage system H protein, mitochondrial OS=Homo sapiens GN=GCSH PE=1 SV=2	1	3	3	3	2	2	1	1	1	1	2	1	0	1	1	0	0	0	2	1	2	2	1	1	1	1	2	1	0	1	1	0	0	0	2	1	2	2	1	1	1	1
P23458	P23458	4	4	4	Tyrosine-protein kinase JAK1	JAK1	sp|P23458|JAK1_HUMAN Tyrosine-protein kinase JAK1 OS=Homo sapiens GN=JAK1 PE=1 SV=2	1	4	4	4	1	1	1	0	1	0	1	1	3	2	0	1	1	0	2	1	1	1	1	0	1	0	1	1	3	2	0	1	1	0	2	1	1	1	1	0	1	0
P23470	P23470	7	7	7	Receptor-type tyrosine-protein phosphatase gamma	PTPRG	sp|P23470|PTPRG_HUMAN Receptor-type tyrosine-protein phosphatase gamma OS=Homo sapiens GN=PTPRG PE=1 SV=4	1	7	7	7	3	2	2	1	0	1	1	1	3	1	1	1	3	3	3	0	3	2	2	1	0	1	1	1	3	1	1	1	3	3	3	0	3	2	2	1	0	1
P23497	P23497	3	3	3	Nuclear autoantigen Sp-100	SP100	sp|P23497|SP100_HUMAN Nuclear autoantigen Sp-100 OS=Homo sapiens GN=SP100 PE=1 SV=3	1	3	3	3	0	1	2	1	0	0	3	0	1	0	0	0	0	0	0	0	0	1	2	1	0	0	3	0	1	0	0	0	0	0	0	0	0	1	2	1	0	0
P23511	P23511	2	2	2	Nuclear transcription factor Y subunit alpha	NFYA	sp|P23511|NFYA_HUMAN Nuclear transcription factor Y subunit alpha OS=Homo sapiens GN=NFYA PE=1 SV=2	1	2	2	2	1	2	1	1	0	2	2	1	1	1	1	1	2	1	1	0	1	2	1	1	0	2	2	1	1	1	1	1	2	1	1	0	1	2	1	1	0	2
P23526	P23526	1	1	1	Adenosylhomocysteinase	AHCY	sp|P23526|SAHH_HUMAN Adenosylhomocysteinase OS=Homo sapiens GN=AHCY PE=1 SV=4	1	1	1	1	1	1	0	0	1	0	1	1	0	1	0	1	1	1	1	1	1	1	0	0	1	0	1	1	0	1	0	1	1	1	1	1	1	1	0	0	1	0
P23528	P23528	4	4	2	Cofilin-1	CFL1	sp|P23528|COF1_HUMAN Cofilin-1 OS=Homo sapiens GN=CFL1 PE=1 SV=3	1	4	4	2	3	1	2	2	2	1	2	2	2	1	2	2	2	2	1	1	3	1	2	2	2	1	2	2	2	1	2	2	2	2	1	1	2	1	2	2	1	1
P23588	P23588	5	5	5	Eukaryotic translation initiation factor 4B	EIF4B	sp|P23588|IF4B_HUMAN Eukaryotic translation initiation factor 4B OS=Homo sapiens GN=EIF4B PE=1 SV=2	1	5	5	5	3	3	3	2	4	5	2	4	2	3	3	4	2	3	2	1	3	3	3	2	4	5	2	4	2	3	3	4	2	3	2	1	3	3	3	2	4	5
P23610	P23610	1	1	1	Factor VIII intron 22 protein	F8A1	sp|P23610|F8I2_HUMAN Factor VIII intron 22 protein OS=Homo sapiens GN=F8A1 PE=1 SV=2	1	1	1	1	0	0	0	0	0	0	1	1	0	0	0	0	0	0	0	0	0	0	0	0	0	0	1	1	0	0	0	0	0	0	0	0	0	0	0	0	0	0
P23634	P23634	6	6	4	Plasma membrane calcium-transporting ATPase 4	ATP2B4	sp|P23634|AT2B4_HUMAN Plasma membrane calcium-transporting ATPase 4 OS=Homo sapiens GN=ATP2B4 PE=1 SV=2	1	6	6	4	1	1	1	1	1	1	2	4	3	1	1	1	2	5	1	1	1	1	1	1	1	1	2	4	3	1	1	1	2	5	1	1	1	1	1	1	1	1
P23743	P23743	1	1	1	Diacylglycerol kinase alpha	DGKA	sp|P23743|DGKA_HUMAN Diacylglycerol kinase alpha OS=Homo sapiens GN=DGKA PE=1 SV=3	1	1	1	1	0	1	0	0	0	0	0	0	1	0	0	0	0	0	0	0	0	1	0	0	0	0	0	0	1	0	0	0	0	0	0	0	0	1	0	0	0	0
P23771	P23771	1	1	1	Trans-acting T-cell-specific transcription factor GATA-3	GATA3	sp|P23771|GATA3_HUMAN Trans-acting T-cell-specific transcription factor GATA-3 OS=Homo sapiens GN=GATA3 PE=1 SV=1	1	1	1	1	0	0	0	0	0	0	1	0	0	0	0	0	0	0	0	0	0	0	0	0	0	0	1	0	0	0	0	0	0	0	0	0	0	0	0	0	0	0
P23786	P23786	4	4	4	Carnitine O-palmitoyltransferase 2, mitochondrial	CPT2	sp|P23786|CPT2_HUMAN Carnitine O-palmitoyltransferase 2, mitochondrial OS=Homo sapiens GN=CPT2 PE=1 SV=2	1	4	4	4	4	2	3	2	1	0	2	2	3	2	1	1	0	2	2	0	4	2	3	2	1	0	2	2	3	2	1	1	0	2	2	0	4	2	3	2	1	0
P23921	P23921	13	13	13	Ribonucleoside-diphosphate reductase large subunit	RRM1	sp|P23921|RIR1_HUMAN Ribonucleoside-diphosphate reductase large subunit OS=Homo sapiens GN=RRM1 PE=1 SV=1	1	13	13	13	5	7	5	5	4	2	8	12	9	9	2	4	7	3	2	1	5	7	5	5	4	2	8	12	9	9	2	4	7	3	2	1	5	7	5	5	4	2
P24385	P24385	1	1	1	G1/S-specific cyclin-D1	CCND1	sp|P24385|CCND1_HUMAN G1/S-specific cyclin-D1 OS=Homo sapiens GN=CCND1 PE=1 SV=1	1	1	1	1	0	0	1	0	0	0	1	0	1	1	0	0	0	0	1	0	0	0	1	0	0	0	1	0	1	1	0	0	0	0	1	0	0	0	1	0	0	0
P24386	P24386	1	1	1	Rab proteins geranylgeranyltransferase component A 1	CHM	sp|P24386|RAE1_HUMAN Rab proteins geranylgeranyltransferase component A 1 OS=Homo sapiens GN=CHM PE=1 SV=3	1	1	1	1	0	0	0	0	0	0	1	0	0	0	0	0	0	0	0	0	0	0	0	0	0	0	1	0	0	0	0	0	0	0	0	0	0	0	0	0	0	0
P24468	P24468	5	5	5	COUP transcription factor 2	NR2F2	sp|P24468|COT2_HUMAN COUP transcription factor 2 OS=Homo sapiens GN=NR2F2 PE=1 SV=1	1	5	5	5	2	2	0	1	0	1	2	3	1	2	1	1	1	2	0	1	2	2	0	1	0	1	2	3	1	2	1	1	1	2	0	1	2	2	0	1	0	1
P24534	P24534	5	5	5	Elongation factor 1-beta	EEF1B2	sp|P24534|EF1B_HUMAN Elongation factor 1-beta OS=Homo sapiens GN=EEF1B2 PE=1 SV=3	1	5	5	5	2	2	2	3	2	2	3	4	3	2	2	2	2	3	2	1	2	2	2	3	2	2	3	4	3	2	2	2	2	3	2	1	2	2	2	3	2	2
P24588	P24588	1	1	1	A-kinase anchor protein 5	AKAP5	sp|P24588|AKAP5_HUMAN A-kinase anchor protein 5 OS=Homo sapiens GN=AKAP5 PE=1 SV=3	1	1	1	1	0	0	0	0	0	0	1	0	0	1	0	0	0	0	0	0	0	0	0	0	0	0	1	0	0	1	0	0	0	0	0	0	0	0	0	0	0	0
P24666	P24666	3	3	3	Low molecular weight phosphotyrosine protein phosphatase	ACP1	sp|P24666|PPAC_HUMAN Low molecular weight phosphotyrosine protein phosphatase OS=Homo sapiens GN=ACP1 PE=1 SV=3	1	3	3	3	2	2	1	2	2	2	2	3	2	1	2	2	1	2	1	1	2	2	1	2	2	2	2	3	2	1	2	2	1	2	1	1	2	2	1	2	2	2
P24752	P24752	1	1	1	Acetyl-CoA acetyltransferase, mitochondrial	ACAT1	sp|P24752|THIL_HUMAN Acetyl-CoA acetyltransferase, mitochondrial OS=Homo sapiens GN=ACAT1 PE=1 SV=1	1	1	1	1	1	1	1	1	1	1	1	0	1	1	1	1	1	1	0	0	1	1	1	1	1	1	1	0	1	1	1	1	1	1	0	0	1	1	1	1	1	1
P24821	P24821	2	2	2	Tenascin	TNC	sp|P24821|TENA_HUMAN Tenascin OS=Homo sapiens GN=TNC PE=1 SV=3	1	2	2	2	1	1	1	0	0	0	0	0	0	0	1	0	2	0	1	0	1	1	1	0	0	0	0	0	0	0	1	0	2	0	1	0	1	1	1	0	0	0
P24844	P24844	3	2	2	Myosin regulatory light polypeptide 9	MYL9	sp|P24844|MYL9_HUMAN Myosin regulatory light polypeptide 9 OS=Homo sapiens GN=MYL9 PE=1 SV=4	1	3	2	2	1	3	2	2	2	2	2	1	2	1	1	2	2	1	2	1	0	2	1	1	1	1	1	0	1	0	0	1	1	0	1	0	0	2	1	1	1	1
P24928	P24928	11	11	11	DNA-directed RNA polymerase II subunit RPB1	POLR2A	sp|P24928|RPB1_HUMAN DNA-directed RNA polymerase II subunit RPB1 OS=Homo sapiens GN=POLR2A PE=1 SV=2	1	11	11	11	6	7	3	4	2	1	6	6	4	4	2	3	2	3	4	0	6	7	3	4	2	1	6	6	4	4	2	3	2	3	4	0	6	7	3	4	2	1
P24941	P24941	1	1	1	Cyclin-dependent kinase 2	CDK2	sp|P24941|CDK2_HUMAN Cyclin-dependent kinase 2 OS=Homo sapiens GN=CDK2 PE=1 SV=2	1	1	1	1	1	1	1	1	0	1	1	0	1	1	1	1	1	1	1	1	1	1	1	1	0	1	1	0	1	1	1	1	1	1	1	1	1	1	1	1	0	1
P25098;P35626	P25098	4;1	4;1	4;1	Beta-adrenergic receptor kinase 1	ADRBK1	sp|P25098|ARBK1_HUMAN Beta-adrenergic receptor kinase 1 OS=Homo sapiens GN=ADRBK1 PE=1 SV=2	2	4	4	4	2	2	1	1	1	1	0	1	1	2	0	1	2	0	0	0	2	2	1	1	1	1	0	1	1	2	0	1	2	0	0	0	2	2	1	1	1	1
P25116	P25116	1	1	1	Proteinase-activated receptor 1	F2R	sp|P25116|PAR1_HUMAN Proteinase-activated receptor 1 OS=Homo sapiens GN=F2R PE=1 SV=2	1	1	1	1	1	0	1	1	1	0	1	0	1	1	0	0	1	0	0	0	1	0	1	1	1	0	1	0	1	1	0	0	1	0	0	0	1	0	1	1	1	0
P25205	P25205	8	8	8	DNA replication licensing factor MCM3	MCM3	sp|P25205|MCM3_HUMAN DNA replication licensing factor MCM3 OS=Homo sapiens GN=MCM3 PE=1 SV=3	1	8	8	8	4	5	3	4	4	2	4	5	5	3	3	2	5	5	3	1	4	5	3	4	4	2	4	5	5	3	3	2	5	5	3	1	4	5	3	4	4	2
P25208	P25208	1	1	1	Nuclear transcription factor Y subunit beta	NFYB	sp|P25208|NFYB_HUMAN Nuclear transcription factor Y subunit beta OS=Homo sapiens GN=NFYB PE=1 SV=2	1	1	1	1	0	0	0	0	0	0	0	0	0	0	0	0	1	0	0	0	0	0	0	0	0	0	0	0	0	0	0	0	1	0	0	0	0	0	0	0	0	0
P25325	P25325	1	1	1	3-mercaptopyruvate sulfurtransferase	MPST	sp|P25325|THTM_HUMAN 3-mercaptopyruvate sulfurtransferase OS=Homo sapiens GN=MPST PE=1 SV=3	1	1	1	1	1	0	1	1	0	0	1	1	1	1	0	0	0	0	1	0	1	0	1	1	0	0	1	1	1	1	0	0	0	0	1	0	1	0	1	1	0	0
P25398	P25398	2	2	2	40S ribosomal protein S12	RPS12	sp|P25398|RS12_HUMAN 40S ribosomal protein S12 OS=Homo sapiens GN=RPS12 PE=1 SV=3	1	2	2	2	1	1	1	1	0	0	1	2	1	1	0	0	1	1	0	1	1	1	1	1	0	0	1	2	1	1	0	0	1	1	0	1	1	1	1	1	0	0
P25440	P25440	1	1	1	Bromodomain-containing protein 2	BRD2	sp|P25440|BRD2_HUMAN Bromodomain-containing protein 2 OS=Homo sapiens GN=BRD2 PE=1 SV=2	1	1	1	1	1	1	1	1	0	1	1	0	0	0	1	1	1	0	0	0	1	1	1	1	0	1	1	0	0	0	1	1	1	0	0	0	1	1	1	1	0	1
P25490	P25490	2	2	2	Transcriptional repressor protein YY1	YY1	sp|P25490|TYY1_HUMAN Transcriptional repressor protein YY1 OS=Homo sapiens GN=YY1 PE=1 SV=2	1	2	2	2	2	2	2	1	1	0	2	1	2	1	2	2	2	1	2	0	2	2	2	1	1	0	2	1	2	1	2	2	2	1	2	0	2	2	2	1	1	0
P25685	P25685	2	2	2	DnaJ homolog subfamily B member 1	DNAJB1	sp|P25685|DNJB1_HUMAN DnaJ homolog subfamily B member 1 OS=Homo sapiens GN=DNAJB1 PE=1 SV=4	1	2	2	2	1	1	1	1	0	1	1	1	1	1	0	0	0	0	0	0	1	1	1	1	0	1	1	1	1	1	0	0	0	0	0	0	1	1	1	1	0	1
P25686	P25686	1	1	1	DnaJ homolog subfamily B member 2	DNAJB2	sp|P25686|DNJB2_HUMAN DnaJ homolog subfamily B member 2 OS=Homo sapiens GN=DNAJB2 PE=1 SV=3	1	1	1	1	1	0	0	0	1	0	1	0	0	1	1	1	1	0	1	0	1	0	0	0	1	0	1	0	0	1	1	1	1	0	1	0	1	0	0	0	1	0
P25705	P25705	7	7	7	ATP synthase subunit alpha, mitochondrial	ATP5A1	sp|P25705|ATPA_HUMAN ATP synthase subunit alpha, mitochondrial OS=Homo sapiens GN=ATP5A1 PE=1 SV=1	1	7	7	7	4	5	5	6	4	4	6	5	6	6	4	5	7	4	2	3	4	5	5	6	4	4	6	5	6	6	4	5	7	4	2	3	4	5	5	6	4	4
P25786	P25786	4	4	4	Proteasome subunit alpha type-1	PSMA1	sp|P25786|PSA1_HUMAN Proteasome subunit alpha type-1 OS=Homo sapiens GN=PSMA1 PE=1 SV=1	1	4	4	4	1	2	1	1	2	2	1	2	1	1	2	2	3	4	3	0	1	2	1	1	2	2	1	2	1	1	2	2	3	4	3	0	1	2	1	1	2	2
P25787	P25787	2	2	2	Proteasome subunit alpha type-2	PSMA2	sp|P25787|PSA2_HUMAN Proteasome subunit alpha type-2 OS=Homo sapiens GN=PSMA2 PE=1 SV=2	1	2	2	2	2	2	2	2	0	1	2	2	2	1	0	1	2	1	0	0	2	2	2	2	0	1	2	2	2	1	0	1	2	1	0	0	2	2	2	2	0	1
P25789	P25789	4	4	4	Proteasome subunit alpha type-4	PSMA4	sp|P25789|PSA4_HUMAN Proteasome subunit alpha type-4 OS=Homo sapiens GN=PSMA4 PE=1 SV=1	1	4	4	4	2	3	2	3	1	1	2	1	3	2	1	1	3	2	2	0	2	3	2	3	1	1	2	1	3	2	1	1	3	2	2	0	2	3	2	3	1	1
P26006	P26006	4	4	4	Integrin alpha-3;Integrin alpha-3 heavy chain;Integrin alpha-3 light chain	ITGA3	sp|P26006|ITA3_HUMAN Integrin alpha-3 OS=Homo sapiens GN=ITGA3 PE=1 SV=5	1	4	4	4	1	1	2	1	1	1	2	1	0	1	1	1	1	2	1	1	1	1	2	1	1	1	2	1	0	1	1	1	1	2	1	1	1	1	2	1	1	1
P26038	P26038	5	5	4	Moesin	MSN	sp|P26038|MOES_HUMAN Moesin OS=Homo sapiens GN=MSN PE=1 SV=3	1	5	5	4	5	5	5	4	4	4	4	5	5	4	2	3	4	3	3	2	5	5	5	4	4	4	4	5	5	4	2	3	4	3	3	2	4	4	4	3	3	3
P26196	P26196	4	4	4	Probable ATP-dependent RNA helicase DDX6	DDX6	sp|P26196|DDX6_HUMAN Probable ATP-dependent RNA helicase DDX6 OS=Homo sapiens GN=DDX6 PE=1 SV=2	1	4	4	4	1	0	2	1	1	1	2	2	1	3	0	0	2	2	0	0	1	0	2	1	1	1	2	2	1	3	0	0	2	2	0	0	1	0	2	1	1	1
P26358	P26358	12	12	12	DNA (cytosine-5)-methyltransferase 1	DNMT1	sp|P26358|DNMT1_HUMAN DNA (cytosine-5)-methyltransferase 1 OS=Homo sapiens GN=DNMT1 PE=1 SV=2	1	12	12	12	6	7	6	4	5	5	6	6	10	5	4	2	4	6	7	2	6	7	6	4	5	5	6	6	10	5	4	2	4	6	7	2	6	7	6	4	5	5
P26368	P26368	5	5	5	Splicing factor U2AF 65 kDa subunit	U2AF2	sp|P26368|U2AF2_HUMAN Splicing factor U2AF 65 kDa subunit OS=Homo sapiens GN=U2AF2 PE=1 SV=4	1	5	5	5	3	4	3	3	1	2	4	4	2	4	3	3	4	5	2	4	3	4	3	3	1	2	4	4	2	4	3	3	4	5	2	4	3	4	3	3	1	2
P26440	P26440	3	3	3	Isovaleryl-CoA dehydrogenase, mitochondrial	IVD	sp|P26440|IVD_HUMAN Isovaleryl-CoA dehydrogenase, mitochondrial OS=Homo sapiens GN=IVD PE=1 SV=1	1	3	3	3	1	1	1	1	0	1	2	2	1	1	1	0	1	1	1	0	1	1	1	1	0	1	2	2	1	1	1	0	1	1	1	0	1	1	1	1	0	1
P26572	P26572	2	2	2	Alpha-1,3-mannosyl-glycoprotein 2-beta-N-acetylglucosaminyltransferase	MGAT1	sp|P26572|MGAT1_HUMAN Alpha-1,3-mannosyl-glycoprotein 2-beta-N-acetylglucosaminyltransferase OS=Homo sapiens GN=MGAT1 PE=1 SV=2	1	2	2	2	0	0	0	0	0	0	1	2	1	1	0	0	1	0	0	0	0	0	0	0	0	0	1	2	1	1	0	0	1	0	0	0	0	0	0	0	0	0
P26583	P26583	3	2	2	High mobility group protein B2	HMGB2	sp|P26583|HMGB2_HUMAN High mobility group protein B2 OS=Homo sapiens GN=HMGB2 PE=1 SV=2	1	3	2	2	2	2	2	2	0	0	2	0	2	2	1	2	0	0	0	0	2	1	2	2	0	0	2	0	2	2	1	2	0	0	0	0	2	1	2	2	0	0
P26599	P26599	9	9	9	Polypyrimidine tract-binding protein 1	PTBP1	sp|P26599|PTBP1_HUMAN Polypyrimidine tract-binding protein 1 OS=Homo sapiens GN=PTBP1 PE=1 SV=1	1	9	9	9	5	6	4	5	3	4	6	8	4	5	3	2	6	9	1	4	5	6	4	5	3	4	6	8	4	5	3	2	6	9	1	4	5	6	4	5	3	4
P26639	P26639	7	7	7	Threonine--tRNA ligase, cytoplasmic	TARS	sp|P26639|SYTC_HUMAN Threonine--tRNA ligase, cytoplasmic OS=Homo sapiens GN=TARS PE=1 SV=3	1	7	7	7	5	5	3	3	2	3	6	6	6	6	2	4	4	3	4	1	5	5	3	3	2	3	6	6	6	6	2	4	4	3	4	1	5	5	3	3	2	3
P26640	P26640	16	16	16	Valine--tRNA ligase	VARS	sp|P26640|SYVC_HUMAN Valine--tRNA ligase OS=Homo sapiens GN=VARS PE=1 SV=4	1	16	16	16	9	7	5	6	3	2	9	9	8	10	1	2	5	7	5	5	9	7	5	6	3	2	9	9	8	10	1	2	5	7	5	5	9	7	5	6	3	2
P26641	P26641	8	8	7	Elongation factor 1-gamma	EEF1G	sp|P26641|EF1G_HUMAN Elongation factor 1-gamma OS=Homo sapiens GN=EEF1G PE=1 SV=3	1	8	8	7	4	4	4	4	2	5	6	6	5	4	5	5	6	5	5	3	4	4	4	4	2	5	6	6	5	4	5	5	6	5	5	3	4	4	4	4	2	5
P26885	P26885	1	1	1	Peptidyl-prolyl cis-trans isomerase FKBP2	FKBP2	sp|P26885|FKBP2_HUMAN Peptidyl-prolyl cis-trans isomerase FKBP2 OS=Homo sapiens GN=FKBP2 PE=1 SV=2	1	1	1	1	1	1	1	1	0	0	1	1	0	1	0	1	1	1	1	0	1	1	1	1	0	0	1	1	0	1	0	1	1	1	1	0	1	1	1	1	0	0
P27105	P27105	2	2	2	Erythrocyte band 7 integral membrane protein	STOM	sp|P27105|STOM_HUMAN Erythrocyte band 7 integral membrane protein OS=Homo sapiens GN=STOM PE=1 SV=3	1	2	2	2	2	2	2	2	1	1	1	2	1	2	1	1	1	1	0	0	2	2	2	2	1	1	1	2	1	2	1	1	1	1	0	0	2	2	2	2	1	1
P27144	P27144	1	1	1	Adenylate kinase 4, mitochondrial	AK4	sp|P27144|KAD4_HUMAN Adenylate kinase 4, mitochondrial OS=Homo sapiens GN=AK4 PE=1 SV=1	1	1	1	1	0	0	0	0	0	0	1	0	0	0	0	0	0	0	0	0	0	0	0	0	0	0	1	0	0	0	0	0	0	0	0	0	0	0	0	0	0	0
P27348	P27348	5	5	5	14-3-3 protein theta	YWHAQ	sp|P27348|1433T_HUMAN 14-3-3 protein theta OS=Homo sapiens GN=YWHAQ PE=1 SV=1	1	5	5	5	3	4	4	3	2	3	4	2	4	5	3	3	4	2	4	0	3	4	4	3	2	3	4	2	4	5	3	3	4	2	4	0	3	4	4	3	2	3
P27361	P27361	3	3	3	Mitogen-activated protein kinase 3	MAPK3	sp|P27361|MK03_HUMAN Mitogen-activated protein kinase 3 OS=Homo sapiens GN=MAPK3 PE=1 SV=4	1	3	3	3	1	1	1	1	0	0	1	0	3	2	0	0	0	0	0	0	1	1	1	1	0	0	1	0	3	2	0	0	0	0	0	0	1	1	1	1	0	0
P27635	P27635	3	3	3	60S ribosomal protein L10	RPL10	sp|P27635|RL10_HUMAN 60S ribosomal protein L10 OS=Homo sapiens GN=RPL10 PE=1 SV=4	1	3	3	3	2	1	1	1	1	1	2	1	1	1	1	2	1	1	1	0	2	1	1	1	1	1	2	1	1	1	1	2	1	1	1	0	2	1	1	1	1	1
P27694	P27694	7	7	7	Replication protein A 70 kDa DNA-binding subunit;Replication protein A 70 kDa DNA-binding subunit, N-terminally processed	RPA1	sp|P27694|RFA1_HUMAN Replication protein A 70 kDa DNA-binding subunit OS=Homo sapiens GN=RPA1 PE=1 SV=2	1	7	7	7	4	4	3	4	3	3	4	5	3	5	2	2	3	4	2	0	4	4	3	4	3	3	4	5	3	5	2	2	3	4	2	0	4	4	3	4	3	3
P27695	P27695	5	5	5	DNA-(apurinic or apyrimidinic site) lyase;DNA-(apurinic or apyrimidinic site) lyase, mitochondrial	APEX1	sp|P27695|APEX1_HUMAN DNA-(apurinic or apyrimidinic site) lyase OS=Homo sapiens GN=APEX1 PE=1 SV=2	1	5	5	5	2	2	1	1	2	2	1	4	1	1	1	1	2	2	1	1	2	2	1	1	2	2	1	4	1	1	1	1	2	2	1	1	2	2	1	1	2	2
P27701	P27701	1	1	1	CD82 antigen	CD82	sp|P27701|CD82_HUMAN CD82 antigen OS=Homo sapiens GN=CD82 PE=1 SV=1	1	1	1	1	1	0	1	1	0	0	1	0	1	1	1	1	1	0	0	0	1	0	1	1	0	0	1	0	1	1	1	1	1	0	0	0	1	0	1	1	0	0
P27707	P27707	1	1	1	Deoxycytidine kinase	DCK	sp|P27707|DCK_HUMAN Deoxycytidine kinase OS=Homo sapiens GN=DCK PE=1 SV=1	1	1	1	1	1	1	0	0	0	0	1	0	0	1	0	0	0	1	1	0	1	1	0	0	0	0	1	0	0	1	0	0	0	1	1	0	1	1	0	0	0	0
P27708	P27708	29	29	29	CAD protein;Glutamine-dependent carbamoyl-phosphate synthase;Aspartate carbamoyltransferase;Dihydroorotase	CAD	sp|P27708|PYR1_HUMAN CAD protein OS=Homo sapiens GN=CAD PE=1 SV=3	1	29	29	29	15	16	11	11	6	7	15	20	18	13	5	6	7	5	5	2	15	16	11	11	6	7	15	20	18	13	5	6	7	5	5	2	15	16	11	11	6	7
P27797	P27797	14	14	14	Calreticulin	CALR	sp|P27797|CALR_HUMAN Calreticulin OS=Homo sapiens GN=CALR PE=1 SV=1	1	14	14	14	7	6	7	9	7	8	8	8	11	10	7	7	9	7	8	3	7	6	7	9	7	8	8	8	11	10	7	7	9	7	8	3	7	6	7	9	7	8
P27816	P27816	12	12	12	Microtubule-associated protein 4	MAP4	sp|P27816|MAP4_HUMAN Microtubule-associated protein 4 OS=Homo sapiens GN=MAP4 PE=1 SV=3	1	12	12	12	8	7	8	10	7	7	9	6	9	9	4	4	8	6	5	2	8	7	8	10	7	7	9	6	9	9	4	4	8	6	5	2	8	7	8	10	7	7
P27824	P27824	13	13	13	Calnexin	CANX	sp|P27824|CALX_HUMAN Calnexin OS=Homo sapiens GN=CANX PE=1 SV=2	1	13	13	13	7	7	6	9	6	7	7	5	6	6	9	8	7	5	4	3	7	7	6	9	6	7	7	5	6	6	9	8	7	5	4	3	7	7	6	9	6	7
P27986	P27986	2	2	2	Phosphatidylinositol 3-kinase regulatory subunit alpha	PIK3R1	sp|P27986|P85A_HUMAN Phosphatidylinositol 3-kinase regulatory subunit alpha OS=Homo sapiens GN=PIK3R1 PE=1 SV=2	1	2	2	2	2	1	1	0	0	0	1	1	2	1	0	0	1	1	0	0	2	1	1	0	0	0	1	1	2	1	0	0	1	1	0	0	2	1	1	0	0	0
P28066	P28066	4	4	4	Proteasome subunit alpha type-5	PSMA5	sp|P28066|PSA5_HUMAN Proteasome subunit alpha type-5 OS=Homo sapiens GN=PSMA5 PE=1 SV=3	1	4	4	4	1	2	1	1	0	0	1	2	3	2	0	0	1	1	0	0	1	2	1	1	0	0	1	2	3	2	0	0	1	1	0	0	1	2	1	1	0	0
P28070	P28070	2	2	2	Proteasome subunit beta type-4	PSMB4	sp|P28070|PSB4_HUMAN Proteasome subunit beta type-4 OS=Homo sapiens GN=PSMB4 PE=1 SV=4	1	2	2	2	2	2	2	2	2	2	2	2	2	2	1	2	2	2	1	1	2	2	2	2	2	2	2	2	2	2	1	2	2	2	1	1	2	2	2	2	2	2
P28072	P28072	2	2	2	Proteasome subunit beta type-6	PSMB6	sp|P28072|PSB6_HUMAN Proteasome subunit beta type-6 OS=Homo sapiens GN=PSMB6 PE=1 SV=4	1	2	2	2	1	1	2	2	1	1	1	1	2	1	2	1	1	1	2	0	1	1	2	2	1	1	1	1	2	1	2	1	1	1	2	0	1	1	2	2	1	1
P28074	P28074	2	2	2	Proteasome subunit beta type-5	PSMB5	sp|P28074|PSB5_HUMAN Proteasome subunit beta type-5 OS=Homo sapiens GN=PSMB5 PE=1 SV=3	1	2	2	2	1	1	1	1	0	0	1	1	2	2	0	0	1	0	0	0	1	1	1	1	0	0	1	1	2	2	0	0	1	0	0	0	1	1	1	1	0	0
P28288	P28288	2	2	2	ATP-binding cassette sub-family D member 3	ABCD3	sp|P28288|ABCD3_HUMAN ATP-binding cassette sub-family D member 3 OS=Homo sapiens GN=ABCD3 PE=1 SV=1	1	2	2	2	2	2	2	2	1	2	2	2	2	2	1	2	1	2	1	1	2	2	2	2	1	2	2	2	2	2	1	2	1	2	1	1	2	2	2	2	1	2
P28290	P28290	8	8	8	Sperm-specific antigen 2	SSFA2	sp|P28290|SSFA2_HUMAN Sperm-specific antigen 2 OS=Homo sapiens GN=SSFA2 PE=1 SV=3	1	8	8	8	1	3	2	3	2	0	2	0	1	4	1	2	3	0	2	0	1	3	2	3	2	0	2	0	1	4	1	2	3	0	2	0	1	3	2	3	2	0
P28300	P28300	3	3	3	Protein-lysine 6-oxidase	LOX	sp|P28300|LYOX_HUMAN Protein-lysine 6-oxidase OS=Homo sapiens GN=LOX PE=1 SV=2	1	3	3	3	1	0	0	1	0	1	2	0	1	2	2	1	1	1	1	1	1	0	0	1	0	1	2	0	1	2	2	1	1	1	1	1	1	0	0	1	0	1
P28331	P28331	6	6	6	NADH-ubiquinone oxidoreductase 75 kDa subunit, mitochondrial	NDUFS1	sp|P28331|NDUS1_HUMAN NADH-ubiquinone oxidoreductase 75 kDa subunit, mitochondrial OS=Homo sapiens GN=NDUFS1 PE=1 SV=3	1	6	6	6	5	4	4	5	2	2	5	4	5	5	3	2	3	4	3	0	5	4	4	5	2	2	5	4	5	5	3	2	3	4	3	0	5	4	4	5	2	2
P28340	P28340	5	5	5	DNA polymerase delta catalytic subunit	POLD1	sp|P28340|DPOD1_HUMAN DNA polymerase delta catalytic subunit OS=Homo sapiens GN=POLD1 PE=1 SV=2	1	5	5	5	2	2	4	2	1	2	3	2	3	4	0	2	2	3	3	0	2	2	4	2	1	2	3	2	3	4	0	2	2	3	3	0	2	2	4	2	1	2
P28347	P28347	6	6	5	Transcriptional enhancer factor TEF-1	TEAD1	sp|P28347|TEAD1_HUMAN Transcriptional enhancer factor TEF-1 OS=Homo sapiens GN=TEAD1 PE=1 SV=2	1	6	6	5	4	6	3	3	0	1	4	3	2	1	2	1	1	3	1	0	4	6	3	3	0	1	4	3	2	1	2	1	1	3	1	0	4	5	2	2	0	1
P28482	P28482	5	5	5	Mitogen-activated protein kinase 1	MAPK1	sp|P28482|MK01_HUMAN Mitogen-activated protein kinase 1 OS=Homo sapiens GN=MAPK1 PE=1 SV=3	1	5	5	5	2	2	2	2	0	1	3	3	2	2	0	0	3	2	3	0	2	2	2	2	0	1	3	3	2	2	0	0	3	2	3	0	2	2	2	2	0	1
P28676	P28676	1	1	1	Grancalcin	GCA	sp|P28676|GRAN_HUMAN Grancalcin OS=Homo sapiens GN=GCA PE=1 SV=2	1	1	1	1	0	0	0	0	0	0	0	0	1	0	0	0	0	0	0	0	0	0	0	0	0	0	0	0	1	0	0	0	0	0	0	0	0	0	0	0	0	0
P28702	P28702	1	1	1	Retinoic acid receptor RXR-beta	RXRB	sp|P28702|RXRB_HUMAN Retinoic acid receptor RXR-beta OS=Homo sapiens GN=RXRB PE=1 SV=2	1	1	1	1	0	0	1	0	0	0	0	0	0	0	0	1	0	0	0	0	0	0	1	0	0	0	0	0	0	0	0	1	0	0	0	0	0	0	1	0	0	0
P28749	P28749	2	2	2	Retinoblastoma-like protein 1	RBL1	sp|P28749|RBL1_HUMAN Retinoblastoma-like protein 1 OS=Homo sapiens GN=RBL1 PE=1 SV=3	1	2	2	2	1	1	0	1	0	0	2	0	1	1	0	0	0	0	0	1	1	1	0	1	0	0	2	0	1	1	0	0	0	0	0	1	1	1	0	1	0	0
P28799	P28799	4	4	4	Granulins;Acrogranin;Paragranulin;Granulin-1;Granulin-2;Granulin-3;Granulin-4;Granulin-5;Granulin-6;Granulin-7	GRN	sp|P28799|GRN_HUMAN Granulins OS=Homo sapiens GN=GRN PE=1 SV=2	1	4	4	4	3	4	3	4	0	2	2	2	4	2	2	1	1	1	1	0	3	4	3	4	0	2	2	2	4	2	2	1	1	1	1	0	3	4	3	4	0	2
P28838	P28838	3	3	3	Cytosol aminopeptidase	LAP3	sp|P28838|AMPL_HUMAN Cytosol aminopeptidase OS=Homo sapiens GN=LAP3 PE=1 SV=3	1	3	3	3	1	1	2	1	1	1	2	1	2	2	1	1	0	1	1	0	1	1	2	1	1	1	2	1	2	2	1	1	0	1	1	0	1	1	2	1	1	1
P29083	P29083	4	4	4	General transcription factor IIE subunit 1	GTF2E1	sp|P29083|T2EA_HUMAN General transcription factor IIE subunit 1 OS=Homo sapiens GN=GTF2E1 PE=1 SV=2	1	4	4	4	0	0	1	2	0	0	0	0	3	3	0	0	0	0	0	0	0	0	1	2	0	0	0	0	3	3	0	0	0	0	0	0	0	0	1	2	0	0
P29084	P29084	1	1	1	Transcription initiation factor IIE subunit beta	GTF2E2	sp|P29084|T2EB_HUMAN Transcription initiation factor IIE subunit beta OS=Homo sapiens GN=GTF2E2 PE=1 SV=1	1	1	1	1	0	0	0	0	0	0	1	0	0	0	0	0	0	0	0	0	0	0	0	0	0	0	1	0	0	0	0	0	0	0	0	0	0	0	0	0	0	0
P29144	P29144	8	8	8	Tripeptidyl-peptidase 2	TPP2	sp|P29144|TPP2_HUMAN Tripeptidyl-peptidase 2 OS=Homo sapiens GN=TPP2 PE=1 SV=4	1	8	8	8	4	3	3	3	1	2	2	1	6	6	2	1	3	1	2	0	4	3	3	3	1	2	2	1	6	6	2	1	3	1	2	0	4	3	3	3	1	2
P29279	P29279	1	1	1	Connective tissue growth factor	CTGF	sp|P29279|CTGF_HUMAN Connective tissue growth factor OS=Homo sapiens GN=CTGF PE=1 SV=2	1	1	1	1	1	0	0	1	0	0	1	0	1	1	0	1	0	0	1	0	1	0	0	1	0	0	1	0	1	1	0	1	0	0	1	0	1	0	0	1	0	0
P29317	P29317	16	16	16	Ephrin type-A receptor 2	EPHA2	sp|P29317|EPHA2_HUMAN Ephrin type-A receptor 2 OS=Homo sapiens GN=EPHA2 PE=1 SV=2	1	16	16	16	10	10	11	8	6	6	12	12	10	8	7	7	9	8	6	2	10	10	11	8	6	6	12	12	10	8	7	7	9	8	6	2	10	10	11	8	6	6
P29323	P29323	5	5	5	Ephrin type-B receptor 2	EPHB2	sp|P29323|EPHB2_HUMAN Ephrin type-B receptor 2 OS=Homo sapiens GN=EPHB2 PE=1 SV=5	1	5	5	5	0	0	1	0	0	1	2	1	2	1	0	0	0	0	1	0	0	0	1	0	0	1	2	1	2	1	0	0	0	0	1	0	0	0	1	0	0	1
P29353	P29353	5	5	5	SHC-transforming protein 1	SHC1	sp|P29353|SHC1_HUMAN SHC-transforming protein 1 OS=Homo sapiens GN=SHC1 PE=1 SV=4	1	5	5	5	0	0	1	1	0	0	1	2	3	4	0	0	2	2	1	0	0	0	1	1	0	0	1	2	3	4	0	0	2	2	1	0	0	0	1	1	0	0
P29401	P29401	13	13	13	Transketolase	TKT	sp|P29401|TKT_HUMAN Transketolase OS=Homo sapiens GN=TKT PE=1 SV=3	1	13	13	13	7	4	6	5	3	4	9	12	7	6	3	3	7	8	3	4	7	4	6	5	3	4	9	12	7	6	3	3	7	8	3	4	7	4	6	5	3	4
P29508	P29508	1	1	1	Serpin B3	SERPINB3	sp|P29508|SPB3_HUMAN Serpin B3 OS=Homo sapiens GN=SERPINB3 PE=1 SV=2	1	1	1	1	0	0	0	0	1	1	0	0	0	0	1	1	0	0	0	0	0	0	0	0	1	1	0	0	0	0	1	1	0	0	0	0	0	0	0	0	1	1
P29558	P29558	1	1	1	RNA-binding motif, single-stranded-interacting protein 1	RBMS1	sp|P29558|RBMS1_HUMAN RNA-binding motif, single-stranded-interacting protein 1 OS=Homo sapiens GN=RBMS1 PE=1 SV=3	1	1	1	1	1	1	1	1	0	1	1	1	1	1	1	0	1	1	1	0	1	1	1	1	0	1	1	1	1	1	1	0	1	1	1	0	1	1	1	1	0	1
P29590	P29590	2	2	2	Protein PML	PML	sp|P29590|PML_HUMAN Protein PML OS=Homo sapiens GN=PML PE=1 SV=3	1	2	2	2	1	1	2	2	0	0	0	0	1	0	0	0	0	0	0	0	1	1	2	2	0	0	0	0	1	0	0	0	0	0	0	0	1	1	2	2	0	0
P29692	P29692	4	4	4	Elongation factor 1-delta	EEF1D	sp|P29692|EF1D_HUMAN Elongation factor 1-delta OS=Homo sapiens GN=EEF1D PE=1 SV=5	1	4	4	4	3	3	3	3	2	3	3	4	2	3	1	3	3	4	2	1	3	3	3	3	2	3	3	4	2	3	1	3	3	4	2	1	3	3	3	3	2	3
P29966	P29966	4	4	4	Myristoylated alanine-rich C-kinase substrate	MARCKS	sp|P29966|MARCS_HUMAN Myristoylated alanine-rich C-kinase substrate OS=Homo sapiens GN=MARCKS PE=1 SV=4	1	4	4	4	2	3	4	4	3	3	4	1	4	3	3	3	3	2	4	0	2	3	4	4	3	3	4	1	4	3	3	3	3	2	4	0	2	3	4	4	3	3
P29992;O95837	P29992	3;1	3;1	2;1	Guanine nucleotide-binding protein subunit alpha-11	GNA11	sp|P29992|GNA11_HUMAN Guanine nucleotide-binding protein subunit alpha-11 OS=Homo sapiens GN=GNA11 PE=1 SV=2	2	3	3	2	2	2	2	2	1	1	3	2	2	1	1	1	1	2	0	2	2	2	2	2	1	1	3	2	2	1	1	1	1	2	0	2	2	2	2	2	1	1
P30038	P30038	3	3	3	Delta-1-pyrroline-5-carboxylate dehydrogenase, mitochondrial	ALDH4A1	sp|P30038|AL4A1_HUMAN Delta-1-pyrroline-5-carboxylate dehydrogenase, mitochondrial OS=Homo sapiens GN=ALDH4A1 PE=1 SV=3	1	3	3	3	0	0	0	0	0	0	1	1	3	0	0	0	0	0	1	0	0	0	0	0	0	0	1	1	3	0	0	0	0	0	1	0	0	0	0	0	0	0
P30040	P30040	3	3	3	Endoplasmic reticulum resident protein 29	ERP29	sp|P30040|ERP29_HUMAN Endoplasmic reticulum resident protein 29 OS=Homo sapiens GN=ERP29 PE=1 SV=4	1	3	3	3	2	3	2	2	2	1	3	3	2	2	1	1	2	2	2	1	2	3	2	2	2	1	3	3	2	2	1	1	2	2	2	1	2	3	2	2	2	1
P30041	P30041	2	2	2	Peroxiredoxin-6	PRDX6	sp|P30041|PRDX6_HUMAN Peroxiredoxin-6 OS=Homo sapiens GN=PRDX6 PE=1 SV=3	1	2	2	2	0	2	1	0	1	1	1	1	1	2	1	1	1	1	1	1	0	2	1	0	1	1	1	1	1	2	1	1	1	1	1	1	0	2	1	0	1	1
P30042	P30042	2	2	2	ES1 protein homolog, mitochondrial	C21orf33	sp|P30042|ES1_HUMAN ES1 protein homolog, mitochondrial OS=Homo sapiens GN=C21orf33 PE=1 SV=3	1	2	2	2	0	0	0	0	0	0	0	2	0	0	0	0	0	2	0	0	0	0	0	0	0	0	0	2	0	0	0	0	0	2	0	0	0	0	0	0	0	0
P30043	P30043	3	3	3	Flavin reductase (NADPH)	BLVRB	sp|P30043|BLVRB_HUMAN Flavin reductase (NADPH) OS=Homo sapiens GN=BLVRB PE=1 SV=3	1	3	3	3	3	3	2	2	2	2	2	3	2	2	1	2	2	1	2	0	3	3	2	2	2	2	2	3	2	2	1	2	2	1	2	0	3	3	2	2	2	2
P30044	P30044	3	3	3	Peroxiredoxin-5, mitochondrial	PRDX5	sp|P30044|PRDX5_HUMAN Peroxiredoxin-5, mitochondrial OS=Homo sapiens GN=PRDX5 PE=1 SV=4	1	3	3	3	1	1	1	1	1	1	1	3	1	1	1	1	1	1	0	0	1	1	1	1	1	1	1	3	1	1	1	1	1	1	0	0	1	1	1	1	1	1
P30048	P30048	1	1	1	Thioredoxin-dependent peroxide reductase, mitochondrial	PRDX3	sp|P30048|PRDX3_HUMAN Thioredoxin-dependent peroxide reductase, mitochondrial OS=Homo sapiens GN=PRDX3 PE=1 SV=3	1	1	1	1	1	1	1	1	1	1	1	1	1	0	1	1	1	1	1	0	1	1	1	1	1	1	1	1	1	0	1	1	1	1	1	0	1	1	1	1	1	1
P30049	P30049	3	3	3	ATP synthase subunit delta, mitochondrial	ATP5D	sp|P30049|ATPD_HUMAN ATP synthase subunit delta, mitochondrial OS=Homo sapiens GN=ATP5D PE=1 SV=2	1	3	3	3	1	0	2	1	1	2	2	2	1	2	1	0	0	1	0	0	1	0	2	1	1	2	2	2	1	2	1	0	0	1	0	0	1	0	2	1	1	2
P30050	P30050	3	3	3	60S ribosomal protein L12	RPL12	sp|P30050|RL12_HUMAN 60S ribosomal protein L12 OS=Homo sapiens GN=RPL12 PE=1 SV=1	1	3	3	3	3	3	3	3	3	2	3	1	3	3	3	3	1	1	1	1	3	3	3	3	3	2	3	1	3	3	3	3	1	1	1	1	3	3	3	3	3	2
P30084	P30084	3	3	3	Enoyl-CoA hydratase, mitochondrial	ECHS1	sp|P30084|ECHM_HUMAN Enoyl-CoA hydratase, mitochondrial OS=Homo sapiens GN=ECHS1 PE=1 SV=4	1	3	3	3	0	0	0	0	0	0	1	0	0	0	0	0	0	3	0	0	0	0	0	0	0	0	1	0	0	0	0	0	0	3	0	0	0	0	0	0	0	0
P30086	P30086	3	3	3	Phosphatidylethanolamine-binding protein 1;Hippocampal cholinergic neurostimulating peptide	PEBP1	sp|P30086|PEBP1_HUMAN Phosphatidylethanolamine-binding protein 1 OS=Homo sapiens GN=PEBP1 PE=1 SV=3	1	3	3	3	2	2	2	2	2	3	2	2	3	2	2	2	2	3	2	1	2	2	2	2	2	3	2	2	3	2	2	2	2	3	2	1	2	2	2	2	2	3
P30101	P30101	7	7	7	Protein disulfide-isomerase A3	PDIA3	sp|P30101|PDIA3_HUMAN Protein disulfide-isomerase A3 OS=Homo sapiens GN=PDIA3 PE=1 SV=4	1	7	7	7	3	3	3	3	2	1	5	3	4	5	2	2	4	4	2	1	3	3	3	3	2	1	5	3	4	5	2	2	4	4	2	1	3	3	3	3	2	1
P30153	P30153	8	8	5	Serine/threonine-protein phosphatase 2A 65 kDa regulatory subunit A alpha isoform	PPP2R1A	sp|P30153|2AAA_HUMAN Serine/threonine-protein phosphatase 2A 65 kDa regulatory subunit A alpha isoform OS=Homo sapiens GN=PPP2R1A PE=1 SV=4	1	8	8	5	4	5	4	3	3	3	6	5	6	4	1	2	2	4	1	1	4	5	4	3	3	3	6	5	6	4	1	2	2	4	1	1	4	4	4	3	2	2
P30154	P30154	4	2	2	Serine/threonine-protein phosphatase 2A 65 kDa regulatory subunit A beta isoform	PPP2R1B	sp|P30154|2AAB_HUMAN Serine/threonine-protein phosphatase 2A 65 kDa regulatory subunit A beta isoform OS=Homo sapiens GN=PPP2R1B PE=1 SV=3	1	4	2	2	1	1	1	2	2	2	2	2	2	1	0	0	2	3	1	0	1	0	1	2	1	1	1	1	1	1	0	0	1	1	1	0	1	0	1	2	1	1
P30260	P30260	8	8	8	Cell division cycle protein 27 homolog	CDC27	sp|P30260|CDC27_HUMAN Cell division cycle protein 27 homolog OS=Homo sapiens GN=CDC27 PE=1 SV=2	1	8	8	8	2	3	2	2	0	1	3	5	1	0	0	0	3	3	2	0	2	3	2	2	0	1	3	5	1	0	0	0	3	3	2	0	2	3	2	2	0	1
P30281	P30281	1	1	1	G1/S-specific cyclin-D3	CCND3	sp|P30281|CCND3_HUMAN G1/S-specific cyclin-D3 OS=Homo sapiens GN=CCND3 PE=1 SV=2	1	1	1	1	0	0	0	0	0	0	0	0	1	1	0	0	0	0	0	0	0	0	0	0	0	0	0	0	1	1	0	0	0	0	0	0	0	0	0	0	0	0
P30405	P30405	2	2	2	Peptidyl-prolyl cis-trans isomerase F, mitochondrial	PPIF	sp|P30405|PPIF_HUMAN Peptidyl-prolyl cis-trans isomerase F, mitochondrial OS=Homo sapiens GN=PPIF PE=1 SV=1	1	2	2	2	0	0	1	0	0	1	0	0	0	0	1	1	0	0	0	0	0	0	1	0	0	1	0	0	0	0	1	1	0	0	0	0	0	0	1	0	0	1
P30414	P30414	1	1	1	NK-tumor recognition protein;Putative peptidyl-prolyl cis-trans isomerase	NKTR	sp|P30414|NKTR_HUMAN NK-tumor recognition protein OS=Homo sapiens GN=NKTR PE=1 SV=2	1	1	1	1	0	0	1	0	0	0	0	0	1	1	0	0	0	0	0	0	0	0	1	0	0	0	0	0	1	1	0	0	0	0	0	0	0	0	1	0	0	0
P30419;O60551	P30419	4;1	4;1	4;1	Glycylpeptide N-tetradecanoyltransferase 1	NMT1	sp|P30419|NMT1_HUMAN Glycylpeptide N-tetradecanoyltransferase 1 OS=Homo sapiens GN=NMT1 PE=1 SV=2	2	4	4	4	3	2	3	2	2	1	2	2	2	2	2	3	2	4	1	1	3	2	3	2	2	1	2	2	2	2	2	3	2	4	1	1	3	2	3	2	2	1
P30512;P30456;P30459;P30457;P30453;P30450;P18462;P16190;P16189;P10314	P30512;P30456;P30459;P30457;P30453;P30450;P18462;P16190;P16189;P10314	6;6;5;5;5;5;5;5;5;5	3;3;2;2;2;2;2;2;2;2	3;3;2;2;2;2;2;2;2;2	HLA class I histocompatibility antigen, A-29 alpha chain;HLA class I histocompatibility antigen, A-43 alpha chain;HLA class I histocompatibility antigen, A-74 alpha chain;HLA class I histocompatibility antigen, A-66 alpha chain;HLA class I histocompatibility antigen, A-34 alpha chain;HLA class I histocompatibility antigen, A-26 alpha chain;HLA class I histocompatibility antigen, A-25 alpha chain;…	HLA-A	sp|P30512|1A29_HUMAN HLA class I histocompatibility antigen, A-29 alpha chain OS=Homo sapiens GN=HLA-A PE=1 SV=2;sp|P30456|1A43_HUMAN HLA class I histocompatibility antigen, A-43 alpha chain OS=Homo sapiens GN=HLA-A PE=1 SV=1;sp|P30459|1A74_HUMAN HLA class	10	6	3	3	2	2	3	3	3	3	3	2	2	3	4	3	2	5	2	2	1	1	2	2	2	2	2	1	1	2	2	2	1	2	2	2	1	1	2	2	2	2
Q9TNN7;P30505;Q29963;Q29960;Q07000;P30508;P01893;Q95604;Q29865;P30510;P30504;P04222	Q9TNN7;P30505;Q29963;Q29960;Q07000;P30508;P01893;Q95604	6;6;5;5;5;5;4;4;2;2;2;2	2;2;1;1;1;1;0;1;1;1;1;1	2;2;1;1;1;1;0;1;1;1;1;1	HLA class I histocompatibility antigen, Cw-5 alpha chain;HLA class I histocompatibility antigen, Cw-8 alpha chain;HLA class I histocompatibility antigen, Cw-6 alpha chain;HLA class I histocompatibility antigen, Cw-16 alpha chain;HLA class I histocompatibility antigen, Cw-15 alpha chain;HLA class I histocompatibility antigen, Cw-12 alpha chain;Putative HLA class I histocompatibility antigen, alpha…	HLA-C;HLA-H	sp|Q9TNN7|1C05_HUMAN HLA class I histocompatibility antigen, Cw-5 alpha chain OS=Homo sapiens GN=HLA-C PE=1 SV=1;sp|P30505|1C08_HUMAN HLA class I histocompatibility antigen, Cw-8 alpha chain OS=Homo sapiens GN=HLA-C PE=1 SV=1;sp|Q29963|1C06_HUMAN HLA class	12	6	2	2	2	2	3	3	1	1	2	4	3	2	3	2	2	3	1	1	1	1	2	2	0	0	1	1	2	1	1	1	0	0	1	0	1	1	2	2	0	0
P30519	P30519	5	5	5	Heme oxygenase 2	HMOX2	sp|P30519|HMOX2_HUMAN Heme oxygenase 2 OS=Homo sapiens GN=HMOX2 PE=1 SV=2	1	5	5	5	2	2	4	4	1	1	2	4	3	2	3	2	3	3	2	2	2	2	4	4	1	1	2	4	3	2	3	2	3	3	2	2	2	2	4	4	1	1
P30520	P30520	2	2	2	Adenylosuccinate synthetase isozyme 2	ADSS	sp|P30520|PURA2_HUMAN Adenylosuccinate synthetase isozyme 2 OS=Homo sapiens GN=ADSS PE=1 SV=3	1	2	2	2	0	0	1	0	0	0	0	1	0	0	0	0	0	1	0	0	0	0	1	0	0	0	0	1	0	0	0	0	0	1	0	0	0	0	1	0	0	0
P30530	P30530	5	5	5	Tyrosine-protein kinase receptor UFO	AXL	sp|P30530|UFO_HUMAN Tyrosine-protein kinase receptor UFO OS=Homo sapiens GN=AXL PE=1 SV=3	1	5	5	5	4	5	4	4	4	5	4	5	4	4	3	4	4	5	3	1	4	5	4	4	4	5	4	5	4	4	3	4	4	5	3	1	4	5	4	4	4	5
P30533	P30533	2	2	2	Alpha-2-macroglobulin receptor-associated protein	LRPAP1	sp|P30533|AMRP_HUMAN Alpha-2-macroglobulin receptor-associated protein OS=Homo sapiens GN=LRPAP1 PE=1 SV=1	1	2	2	2	1	1	1	0	0	0	1	1	1	2	1	1	1	1	0	0	1	1	1	0	0	0	1	1	1	2	1	1	1	1	0	0	1	1	1	0	0	0
P30536	P30536	3	3	3	Translocator protein	TSPO	sp|P30536|TSPOA_HUMAN Translocator protein OS=Homo sapiens GN=TSPO PE=1 SV=3	1	3	3	3	1	2	2	2	0	0	1	2	1	2	0	0	1	0	1	0	1	2	2	2	0	0	1	2	1	2	0	0	1	0	1	0	1	2	2	2	0	0
P30566	P30566	4	4	4	Adenylosuccinate lyase	ADSL	sp|P30566|PUR8_HUMAN Adenylosuccinate lyase OS=Homo sapiens GN=ADSL PE=1 SV=2	1	4	4	4	2	1	1	1	0	1	3	3	3	3	0	1	1	1	0	0	2	1	1	1	0	1	3	3	3	3	0	1	1	1	0	0	2	1	1	1	0	1
P30622	P30622	4	4	4	CAP-Gly domain-containing linker protein 1	CLIP1	sp|P30622|CLIP1_HUMAN CAP-Gly domain-containing linker protein 1 OS=Homo sapiens GN=CLIP1 PE=1 SV=2	1	4	4	4	0	0	1	2	0	0	2	0	2	1	0	0	1	1	1	0	0	0	1	2	0	0	2	0	2	1	0	0	1	1	1	0	0	0	1	2	0	0
P30626	P30626	2	2	2	Sorcin	SRI	sp|P30626|SORCN_HUMAN Sorcin OS=Homo sapiens GN=SRI PE=1 SV=1	1	2	2	2	2	1	1	1	1	1	1	1	2	1	1	1	2	1	1	0	2	1	1	1	1	1	1	1	2	1	1	1	2	1	1	0	2	1	1	1	1	1
P30740	P30740	1	1	1	Leukocyte elastase inhibitor	SERPINB1	sp|P30740|ILEU_HUMAN Leukocyte elastase inhibitor OS=Homo sapiens GN=SERPINB1 PE=1 SV=1	1	1	1	1	0	0	1	0	0	1	1	1	1	1	0	0	0	0	0	0	0	0	1	0	0	1	1	1	1	1	0	0	0	0	0	0	0	0	1	0	0	1
P30825	P30825	2	2	2	High affinity cationic amino acid transporter 1	SLC7A1	sp|P30825|CTR1_HUMAN High affinity cationic amino acid transporter 1 OS=Homo sapiens GN=SLC7A1 PE=1 SV=1	1	2	2	2	0	0	0	0	0	0	1	0	1	1	0	0	0	1	1	0	0	0	0	0	0	0	1	0	1	1	0	0	0	1	1	0	0	0	0	0	0	0
P30837	P30837	2	2	2	Aldehyde dehydrogenase X, mitochondrial	ALDH1B1	sp|P30837|AL1B1_HUMAN Aldehyde dehydrogenase X, mitochondrial OS=Homo sapiens GN=ALDH1B1 PE=1 SV=3	1	2	2	2	1	2	0	1	0	0	1	2	1	1	0	1	1	1	0	0	1	2	0	1	0	0	1	2	1	1	0	1	1	1	0	0	1	2	0	1	0	0
P30876	P30876	7	7	7	DNA-directed RNA polymerase II subunit RPB2	POLR2B	sp|P30876|RPB2_HUMAN DNA-directed RNA polymerase II subunit RPB2 OS=Homo sapiens GN=POLR2B PE=1 SV=1	1	7	7	7	3	3	4	3	1	2	5	5	3	4	1	1	3	1	1	0	3	3	4	3	1	2	5	5	3	4	1	1	3	1	1	0	3	3	4	3	1	2
P31040	P31040	8	8	8	Succinate dehydrogenase [ubiquinone] flavoprotein subunit, mitochondrial	SDHA	sp|P31040|SDHA_HUMAN Succinate dehydrogenase [ubiquinone] flavoprotein subunit, mitochondrial OS=Homo sapiens GN=SDHA PE=1 SV=2	1	8	8	8	4	5	3	5	1	2	5	5	4	4	1	1	2	4	1	3	4	5	3	5	1	2	5	5	4	4	1	1	2	4	1	3	4	5	3	5	1	2
P31146	P31146	2	2	2	Coronin-1A	CORO1A	sp|P31146|COR1A_HUMAN Coronin-1A OS=Homo sapiens GN=CORO1A PE=1 SV=4	1	2	2	2	1	1	1	0	0	0	1	0	0	2	0	0	0	0	0	0	1	1	1	0	0	0	1	0	0	2	0	0	0	0	0	0	1	1	1	0	0	0
P31150	P31150	5	5	3	Rab GDP dissociation inhibitor alpha	GDI1	sp|P31150|GDIA_HUMAN Rab GDP dissociation inhibitor alpha OS=Homo sapiens GN=GDI1 PE=1 SV=2	1	5	5	3	3	4	2	4	2	2	3	4	4	4	1	4	2	2	1	2	3	4	2	4	2	2	3	4	4	4	1	4	2	2	1	2	1	3	1	3	1	0
P31153	P31153	2	2	2	S-adenosylmethionine synthase isoform type-2	MAT2A	sp|P31153|METK2_HUMAN S-adenosylmethionine synthase isoform type-2 OS=Homo sapiens GN=MAT2A PE=1 SV=1	1	2	2	2	0	0	2	1	0	1	2	1	2	2	0	0	2	2	2	0	0	0	2	1	0	1	2	1	2	2	0	0	2	2	2	0	0	0	2	1	0	1
P31323	P31323	3	3	3	cAMP-dependent protein kinase type II-beta regulatory subunit	PRKAR2B	sp|P31323|KAP3_HUMAN cAMP-dependent protein kinase type II-beta regulatory subunit OS=Homo sapiens GN=PRKAR2B PE=1 SV=3	1	3	3	3	0	0	1	0	0	1	1	0	2	3	0	0	1	0	0	0	0	0	1	0	0	1	1	0	2	3	0	0	1	0	0	0	0	0	1	0	0	1
P31327	P31327	1	1	1	Carbamoyl-phosphate synthase [ammonia], mitochondrial	CPS1	sp|P31327|CPSM_HUMAN Carbamoyl-phosphate synthase [ammonia], mitochondrial OS=Homo sapiens GN=CPS1 PE=1 SV=2	1	1	1	1	0	0	1	0	0	0	0	0	0	1	0	0	0	0	0	0	0	0	1	0	0	0	0	0	0	1	0	0	0	0	0	0	0	0	1	0	0	0
P31483	P31483	2	2	2	Nucleolysin TIA-1 isoform p40	TIA1	sp|P31483|TIA1_HUMAN Nucleolysin TIA-1 isoform p40 OS=Homo sapiens GN=TIA1 PE=1 SV=3	1	2	2	2	0	1	1	1	0	0	2	1	1	0	0	0	0	0	0	0	0	1	1	1	0	0	2	1	1	0	0	0	0	0	0	0	0	1	1	1	0	0
P31689	P31689	7	7	7	DnaJ homolog subfamily A member 1	DNAJA1	sp|P31689|DNJA1_HUMAN DnaJ homolog subfamily A member 1 OS=Homo sapiens GN=DNAJA1 PE=1 SV=2	1	7	7	7	3	4	4	4	3	2	6	5	6	4	3	3	5	5	4	2	3	4	4	4	3	2	6	5	6	4	3	3	5	5	4	2	3	4	4	4	3	2
P31749	P31749	1	1	1	RAC-alpha serine/threonine-protein kinase	AKT1	sp|P31749|AKT1_HUMAN RAC-alpha serine/threonine-protein kinase OS=Homo sapiens GN=AKT1 PE=1 SV=2	1	1	1	1	1	1	1	0	0	0	1	0	1	0	0	0	1	0	0	0	1	1	1	0	0	0	1	0	1	0	0	0	1	0	0	0	1	1	1	0	0	0
P31751	P31751	2	2	2	RAC-beta serine/threonine-protein kinase	AKT2	sp|P31751|AKT2_HUMAN RAC-beta serine/threonine-protein kinase OS=Homo sapiens GN=AKT2 PE=1 SV=2	1	2	2	2	0	0	1	0	0	0	0	0	1	1	0	0	0	0	0	0	0	0	1	0	0	0	0	0	1	1	0	0	0	0	0	0	0	0	1	0	0	0
P31930	P31930	6	6	6	Cytochrome b-c1 complex subunit 1, mitochondrial	UQCRC1	sp|P31930|QCR1_HUMAN Cytochrome b-c1 complex subunit 1, mitochondrial OS=Homo sapiens GN=UQCRC1 PE=1 SV=3	1	6	6	6	4	4	3	5	4	4	4	5	3	5	2	3	5	4	3	1	4	4	3	5	4	4	4	5	3	5	2	3	5	4	3	1	4	4	3	5	4	4
P31937	P31937	2	2	2	3-hydroxyisobutyrate dehydrogenase, mitochondrial	HIBADH	sp|P31937|3HIDH_HUMAN 3-hydroxyisobutyrate dehydrogenase, mitochondrial OS=Homo sapiens GN=HIBADH PE=1 SV=2	1	2	2	2	1	0	2	2	1	1	2	0	2	2	1	1	1	1	0	0	1	0	2	2	1	1	2	0	2	2	1	1	1	1	0	0	1	0	2	2	1	1
P31939	P31939	8	8	8	Bifunctional purine biosynthesis protein PURH;Phosphoribosylaminoimidazolecarboxamide formyltransferase;IMP cyclohydrolase	ATIC	sp|P31939|PUR9_HUMAN Bifunctional purine biosynthesis protein PURH OS=Homo sapiens GN=ATIC PE=1 SV=3	1	8	8	8	3	4	3	3	3	3	4	4	6	6	1	1	4	3	2	0	3	4	3	3	3	3	4	4	6	6	1	1	4	3	2	0	3	4	3	3	3	3
P31942	P31942	9	9	9	Heterogeneous nuclear ribonucleoprotein H3	HNRNPH3	sp|P31942|HNRH3_HUMAN Heterogeneous nuclear ribonucleoprotein H3 OS=Homo sapiens GN=HNRNPH3 PE=1 SV=2	1	9	9	9	6	5	5	6	6	6	5	5	5	5	7	7	7	5	6	1	6	5	5	6	6	6	5	5	5	5	7	7	7	5	6	1	6	5	5	6	6	6
P31943	P31943	7	7	5	Heterogeneous nuclear ribonucleoprotein H;Heterogeneous nuclear ribonucleoprotein H, N-terminally processed	HNRNPH1	sp|P31943|HNRH1_HUMAN Heterogeneous nuclear ribonucleoprotein H OS=Homo sapiens GN=HNRNPH1 PE=1 SV=4	1	7	7	5	3	4	2	2	3	2	4	3	3	3	3	3	5	3	2	1	3	4	2	2	3	2	4	3	3	3	3	3	5	3	2	1	2	3	1	1	2	1
P31946	P31946	5	4	4	14-3-3 protein beta/alpha;14-3-3 protein beta/alpha, N-terminally processed	YWHAB	sp|P31946|1433B_HUMAN 14-3-3 protein beta/alpha OS=Homo sapiens GN=YWHAB PE=1 SV=3	1	5	4	4	3	3	2	2	3	4	3	5	3	3	3	3	3	3	3	2	3	3	2	2	3	4	3	4	3	3	3	3	3	3	3	2	3	3	2	2	3	4
P31948	P31948	4	4	4	Stress-induced-phosphoprotein 1	STIP1	sp|P31948|STIP1_HUMAN Stress-induced-phosphoprotein 1 OS=Homo sapiens GN=STIP1 PE=1 SV=1	1	4	4	4	2	4	3	3	3	3	2	3	3	3	2	2	3	2	1	1	2	4	3	3	3	3	2	3	3	3	2	2	3	2	1	1	2	4	3	3	3	3
P31949	P31949	2	2	2	Protein S100-A11;Protein S100-A11, N-terminally processed	S100A11	sp|P31949|S10AB_HUMAN Protein S100-A11 OS=Homo sapiens GN=S100A11 PE=1 SV=2	1	2	2	2	1	1	1	1	1	1	2	2	2	1	1	1	2	1	1	2	1	1	1	1	1	1	2	2	2	1	1	1	2	1	1	2	1	1	1	1	1	1
P32004	P32004	8	8	8	Neural cell adhesion molecule L1	L1CAM	sp|P32004|L1CAM_HUMAN Neural cell adhesion molecule L1 OS=Homo sapiens GN=L1CAM PE=1 SV=2	1	8	8	8	4	6	5	5	3	5	4	5	4	3	4	3	4	4	4	2	4	6	5	5	3	5	4	5	4	3	4	3	4	4	4	2	4	6	5	5	3	5
P32189;Q14410;Q14409	P32189	3;1;1	3;1;1	3;1;1	Glycerol kinase	GK	sp|P32189|GLPK_HUMAN Glycerol kinase OS=Homo sapiens GN=GK PE=1 SV=3	3	3	3	3	1	1	1	1	0	0	1	1	1	1	0	0	0	0	0	0	1	1	1	1	0	0	1	1	1	1	0	0	0	0	0	0	1	1	1	1	0	0
P32322	P32322	1	1	1	Pyrroline-5-carboxylate reductase 1, mitochondrial	PYCR1	sp|P32322|P5CR1_HUMAN Pyrroline-5-carboxylate reductase 1, mitochondrial OS=Homo sapiens GN=PYCR1 PE=1 SV=2	1	1	1	1	0	0	0	0	0	0	0	1	1	0	0	0	0	1	0	0	0	0	0	0	0	0	0	1	1	0	0	0	0	1	0	0	0	0	0	0	0	0
P32418	P32418	2	2	2	Sodium/calcium exchanger 1	SLC8A1	sp|P32418|NAC1_HUMAN Sodium/calcium exchanger 1 OS=Homo sapiens GN=SLC8A1 PE=1 SV=3	1	2	2	2	0	1	0	1	0	0	0	0	2	0	0	0	0	0	1	0	0	1	0	1	0	0	0	0	2	0	0	0	0	0	1	0	0	1	0	1	0	0
P32455;Q9H0R5	P32455	4;1	4;1	4;1	Interferon-induced guanylate-binding protein 1	GBP1	sp|P32455|GBP1_HUMAN Guanylate-binding protein 1 OS=Homo sapiens GN=GBP1 PE=1 SV=2	2	4	4	4	3	1	1	1	0	0	2	1	3	2	0	2	0	1	1	0	3	1	1	1	0	0	2	1	3	2	0	2	0	1	1	0	3	1	1	1	0	0
P32519	P32519	1	1	1	ETS-related transcription factor Elf-1	ELF1	sp|P32519|ELF1_HUMAN ETS-related transcription factor Elf-1 OS=Homo sapiens GN=ELF1 PE=1 SV=2	1	1	1	1	0	0	0	0	0	0	1	0	1	0	0	0	0	0	0	0	0	0	0	0	0	0	1	0	1	0	0	0	0	0	0	0	0	0	0	0	0	0
P32780	P32780	4	4	4	General transcription factor IIH subunit 1	GTF2H1	sp|P32780|TF2H1_HUMAN General transcription factor IIH subunit 1 OS=Homo sapiens GN=GTF2H1 PE=1 SV=1	1	4	4	4	2	1	1	1	0	0	2	1	3	1	0	0	0	0	0	0	2	1	1	1	0	0	2	1	3	1	0	0	0	0	0	0	2	1	1	1	0	0
P32969	P32969	3	3	3	60S ribosomal protein L9	RPL9	sp|P32969|RL9_HUMAN 60S ribosomal protein L9 OS=Homo sapiens GN=RPL9 PE=1 SV=1	1	3	3	3	0	1	2	1	1	2	2	2	1	2	0	2	2	1	0	1	0	1	2	1	1	2	2	2	1	2	0	2	2	1	0	1	0	1	2	1	1	2
P33121	P33121	2	2	2	Long-chain-fatty-acid--CoA ligase 1	ACSL1	sp|P33121|ACSL1_HUMAN Long-chain-fatty-acid--CoA ligase 1 OS=Homo sapiens GN=ACSL1 PE=1 SV=1	1	2	2	2	1	2	1	1	0	0	1	2	1	1	0	0	1	1	0	0	1	2	1	1	0	0	1	2	1	1	0	0	1	1	0	0	1	2	1	1	0	0
P33176;O60282	P33176	4;1	4;1	4;1	Kinesin-1 heavy chain	KIF5B	sp|P33176|KINH_HUMAN Kinesin-1 heavy chain OS=Homo sapiens GN=KIF5B PE=1 SV=1	2	4	4	4	4	4	3	3	2	2	1	3	3	3	3	3	3	2	2	1	4	4	3	3	2	2	1	3	3	3	3	3	3	2	2	1	4	4	3	3	2	2
P33240	P33240	3	2	2	Cleavage stimulation factor subunit 2	CSTF2	sp|P33240|CSTF2_HUMAN Cleavage stimulation factor subunit 2 OS=Homo sapiens GN=CSTF2 PE=1 SV=1	1	3	2	2	2	2	3	3	1	1	3	1	2	2	1	1	1	0	1	0	1	1	2	2	0	0	2	0	1	1	0	0	0	0	0	0	1	1	2	2	0	0
P33316	P33316	2	2	2	Deoxyuridine 5-triphosphate nucleotidohydrolase, mitochondrial	DUT	sp|P33316|DUT_HUMAN Deoxyuridine 5-triphosphate nucleotidohydrolase, mitochondrial OS=Homo sapiens GN=DUT PE=1 SV=4	1	2	2	2	2	2	2	2	2	1	2	2	2	2	2	2	2	1	2	1	2	2	2	2	2	1	2	2	2	2	2	2	2	1	2	1	2	2	2	2	2	1
P33527	P33527	6	6	6	Multidrug resistance-associated protein 1	ABCC1	sp|P33527|MRP1_HUMAN Multidrug resistance-associated protein 1 OS=Homo sapiens GN=ABCC1 PE=1 SV=3	1	6	6	6	0	1	1	1	0	0	1	2	2	0	0	0	1	1	1	1	0	1	1	1	0	0	1	2	2	0	0	0	1	1	1	1	0	1	1	1	0	0
P33908	P33908	2	2	2	Mannosyl-oligosaccharide 1,2-alpha-mannosidase IA	MAN1A1	sp|P33908|MA1A1_HUMAN Mannosyl-oligosaccharide 1,2-alpha-mannosidase IA OS=Homo sapiens GN=MAN1A1 PE=1 SV=3	1	2	2	2	1	1	1	1	0	0	1	0	2	0	0	0	1	0	1	0	1	1	1	1	0	0	1	0	2	0	0	0	1	0	1	0	1	1	1	1	0	0
P33981	P33981	4	4	4	Dual specificity protein kinase TTK	TTK	sp|P33981|TTK_HUMAN Dual specificity protein kinase TTK OS=Homo sapiens GN=TTK PE=1 SV=2	1	4	4	4	0	1	0	0	0	0	1	1	0	1	0	0	1	0	1	0	0	1	0	0	0	0	1	1	0	1	0	0	1	0	1	0	0	1	0	0	0	0
P33991	P33991	9	9	9	DNA replication licensing factor MCM4	MCM4	sp|P33991|MCM4_HUMAN DNA replication licensing factor MCM4 OS=Homo sapiens GN=MCM4 PE=1 SV=5	1	9	9	9	0	3	2	3	0	2	5	5	4	5	1	0	3	5	2	1	0	3	2	3	0	2	5	5	4	5	1	0	3	5	2	1	0	3	2	3	0	2
P33992	P33992	4	4	4	DNA replication licensing factor MCM5	MCM5	sp|P33992|MCM5_HUMAN DNA replication licensing factor MCM5 OS=Homo sapiens GN=MCM5 PE=1 SV=5	1	4	4	4	2	2	2	2	2	2	3	3	2	2	3	3	3	3	1	0	2	2	2	2	2	2	3	3	2	2	3	3	3	3	1	0	2	2	2	2	2	2
P33993	P33993	5	5	5	DNA replication licensing factor MCM7	MCM7	sp|P33993|MCM7_HUMAN DNA replication licensing factor MCM7 OS=Homo sapiens GN=MCM7 PE=1 SV=4	1	5	5	5	2	4	3	3	2	2	2	3	4	3	1	2	3	4	1	0	2	4	3	3	2	2	2	3	4	3	1	2	3	4	1	0	2	4	3	3	2	2
P34810	P34810	1	1	1	Macrosialin	CD68	sp|P34810|CD68_HUMAN Macrosialin OS=Homo sapiens GN=CD68 PE=1 SV=2	1	1	1	1	0	0	0	0	0	0	1	1	1	1	0	1	1	0	1	0	0	0	0	0	0	0	1	1	1	1	0	1	1	0	1	0	0	0	0	0	0	0
P34896	P34896	3	3	3	Serine hydroxymethyltransferase, cytosolic	SHMT1	sp|P34896|GLYC_HUMAN Serine hydroxymethyltransferase, cytosolic OS=Homo sapiens GN=SHMT1 PE=1 SV=1	1	3	3	3	2	2	2	2	1	1	2	2	2	2	1	1	1	2	0	0	2	2	2	2	1	1	2	2	2	2	1	1	1	2	0	0	2	2	2	2	1	1
P34897	P34897	6	6	6	Serine hydroxymethyltransferase, mitochondrial	SHMT2	sp|P34897|GLYM_HUMAN Serine hydroxymethyltransferase, mitochondrial OS=Homo sapiens GN=SHMT2 PE=1 SV=3	1	6	6	6	4	2	2	1	2	2	4	6	2	2	2	2	2	3	1	3	4	2	2	1	2	2	4	6	2	2	2	2	2	3	1	3	4	2	2	1	2	2
P34910	P34910	1	1	1	Protein EVI2B	EVI2B	sp|P34910|EVI2B_HUMAN Protein EVI2B OS=Homo sapiens GN=EVI2B PE=1 SV=2	1	1	1	1	0	0	1	1	0	0	0	0	1	1	0	0	0	0	0	0	0	0	1	1	0	0	0	0	1	1	0	0	0	0	0	0	0	0	1	1	0	0
P34932	P34932	11	11	11	Heat shock 70 kDa protein 4	HSPA4	sp|P34932|HSP74_HUMAN Heat shock 70 kDa protein 4 OS=Homo sapiens GN=HSPA4 PE=1 SV=4	1	11	11	11	9	9	6	8	6	8	10	8	10	9	8	6	8	7	6	2	9	9	6	8	6	8	10	8	10	9	8	6	8	7	6	2	9	9	6	8	6	8
P34949	P34949	2	2	2	Mannose-6-phosphate isomerase	MPI	sp|P34949|MPI_HUMAN Mannose-6-phosphate isomerase OS=Homo sapiens GN=MPI PE=1 SV=2	1	2	2	2	2	2	2	1	1	1	2	1	1	1	0	1	0	1	1	0	2	2	2	1	1	1	2	1	1	1	0	1	0	1	1	0	2	2	2	1	1	1
P35052	P35052	2	2	2	Glypican-1;Secreted glypican-1	GPC1	sp|P35052|GPC1_HUMAN Glypican-1 OS=Homo sapiens GN=GPC1 PE=1 SV=2	1	2	2	2	0	0	0	0	1	0	0	2	1	0	0	1	1	1	0	0	0	0	0	0	1	0	0	2	1	0	0	1	1	1	0	0	0	0	0	0	1	0
P35080	P35080	1	1	1	Profilin-2	PFN2	sp|P35080|PROF2_HUMAN Profilin-2 OS=Homo sapiens GN=PFN2 PE=1 SV=3	1	1	1	1	1	1	1	1	0	1	1	0	1	1	1	1	0	0	0	0	1	1	1	1	0	1	1	0	1	1	1	1	0	0	0	0	1	1	1	1	0	1
P35221	P35221	9	9	9	Catenin alpha-1	CTNNA1	sp|P35221|CTNA1_HUMAN Catenin alpha-1 OS=Homo sapiens GN=CTNNA1 PE=1 SV=1	1	9	9	9	7	5	7	8	5	5	9	7	8	7	5	5	6	8	5	1	7	5	7	8	5	5	9	7	8	7	5	5	6	8	5	1	7	5	7	8	5	5
P35222	P35222	5	5	5	Catenin beta-1	CTNNB1	sp|P35222|CTNB1_HUMAN Catenin beta-1 OS=Homo sapiens GN=CTNNB1 PE=1 SV=1	1	5	5	5	2	3	4	2	1	2	3	5	4	5	2	1	4	4	3	1	2	3	4	2	1	2	3	5	4	5	2	1	4	4	3	1	2	3	4	2	1	2
P35226	P35226	2	2	2	Polycomb complex protein BMI-1	BMI1	sp|P35226|BMI1_HUMAN Polycomb complex protein BMI-1 OS=Homo sapiens GN=BMI1 PE=1 SV=2	1	2	2	2	0	0	0	1	0	0	0	0	0	1	0	0	0	1	0	0	0	0	0	1	0	0	0	0	0	1	0	0	0	1	0	0	0	0	0	1	0	0
P35232	P35232	4	4	4	Prohibitin	PHB	sp|P35232|PHB_HUMAN Prohibitin OS=Homo sapiens GN=PHB PE=1 SV=1	1	4	4	4	1	1	0	1	2	1	2	0	1	0	1	2	1	1	0	0	1	1	0	1	2	1	2	0	1	0	1	2	1	1	0	0	1	1	0	1	2	1
P35237	P35237	1	1	1	Serpin B6	SERPINB6	sp|P35237|SPB6_HUMAN Serpin B6 OS=Homo sapiens GN=SERPINB6 PE=1 SV=3	1	1	1	1	0	0	0	0	0	0	1	0	0	0	0	0	0	0	0	0	0	0	0	0	0	0	1	0	0	0	0	0	0	0	0	0	0	0	0	0	0	0
P35240	P35240	1	1	1	Merlin	NF2	sp|P35240|MERL_HUMAN Merlin OS=Homo sapiens GN=NF2 PE=1 SV=1	1	1	1	1	0	0	1	0	0	0	0	0	1	0	0	0	0	0	0	0	0	0	1	0	0	0	0	0	1	0	0	0	0	0	0	0	0	0	1	0	0	0
P35241	P35241	2	1	1	Radixin	RDX	sp|P35241|RADI_HUMAN Radixin OS=Homo sapiens GN=RDX PE=1 SV=1	1	2	1	1	1	1	1	1	2	2	2	2	2	1	1	0	2	2	1	1	0	0	0	0	1	1	1	1	1	0	1	0	1	1	1	1	0	0	0	0	1	1
P35244	P35244	2	2	2	Replication protein A 14 kDa subunit	RPA3	sp|P35244|RFA3_HUMAN Replication protein A 14 kDa subunit OS=Homo sapiens GN=RPA3 PE=1 SV=1	1	2	2	2	1	1	0	1	0	0	0	1	1	1	1	1	1	2	0	0	1	1	0	1	0	0	0	1	1	1	1	1	1	2	0	0	1	1	0	1	0	0
P35249	P35249	2	2	2	Replication factor C subunit 4	RFC4	sp|P35249|RFC4_HUMAN Replication factor C subunit 4 OS=Homo sapiens GN=RFC4 PE=1 SV=2	1	2	2	2	1	1	1	1	1	1	2	1	2	1	0	0	2	0	2	0	1	1	1	1	1	1	2	1	2	1	0	0	2	0	2	0	1	1	1	1	1	1
P35250	P35250	2	2	2	Replication factor C subunit 2	RFC2	sp|P35250|RFC2_HUMAN Replication factor C subunit 2 OS=Homo sapiens GN=RFC2 PE=1 SV=3	1	2	2	2	1	1	1	1	0	1	1	0	0	1	1	0	0	1	1	0	1	1	1	1	0	1	1	0	0	1	1	0	0	1	1	0	1	1	1	1	0	1
P35251	P35251	5	5	5	Replication factor C subunit 1	RFC1	sp|P35251|RFC1_HUMAN Replication factor C subunit 1 OS=Homo sapiens GN=RFC1 PE=1 SV=4	1	5	5	5	3	3	3	4	1	3	4	3	3	4	1	2	3	1	2	0	3	3	3	4	1	3	4	3	3	4	1	2	3	1	2	0	3	3	3	4	1	3
P35268	P35268	2	2	2	60S ribosomal protein L22	RPL22	sp|P35268|RL22_HUMAN 60S ribosomal protein L22 OS=Homo sapiens GN=RPL22 PE=1 SV=2	1	2	2	2	2	2	2	2	2	2	2	2	1	1	2	2	2	2	1	1	2	2	2	2	2	2	2	2	1	1	2	2	2	2	1	1	2	2	2	2	2	2
P35269	P35269	1	1	1	General transcription factor IIF subunit 1	GTF2F1	sp|P35269|T2FA_HUMAN General transcription factor IIF subunit 1 OS=Homo sapiens GN=GTF2F1 PE=1 SV=2	1	1	1	1	1	1	1	1	1	1	1	1	1	1	1	1	1	1	0	0	1	1	1	1	1	1	1	1	1	1	1	1	1	1	0	0	1	1	1	1	1	1
P35367	P35367	1	1	1	Histamine H1 receptor	HRH1	sp|P35367|HRH1_HUMAN Histamine H1 receptor OS=Homo sapiens GN=HRH1 PE=1 SV=1	1	1	1	1	0	0	0	0	0	0	0	0	0	1	0	0	0	0	0	0	0	0	0	0	0	0	0	0	0	1	0	0	0	0	0	0	0	0	0	0	0	0
P35443	P35443	1	1	1	Thrombospondin-4	THBS4	sp|P35443|TSP4_HUMAN Thrombospondin-4 OS=Homo sapiens GN=THBS4 PE=1 SV=2	1	1	1	1	1	1	1	1	0	0	1	0	0	0	1	0	1	0	0	0	1	1	1	1	0	0	1	0	0	0	1	0	1	0	0	0	1	1	1	1	0	0
P35544	P35544	2	2	2	Ubiquitin-like protein FUBI	FAU	sp|P35544|UBIM_HUMAN Ubiquitin-like protein FUBI OS=Homo sapiens GN=FAU PE=1 SV=1	1	2	2	2	1	1	1	1	0	0	1	1	1	0	0	0	0	0	0	0	1	1	1	1	0	0	1	1	1	0	0	0	0	0	0	0	1	1	1	1	0	0
P35555	P35555	3	3	3	Fibrillin-1	FBN1	sp|P35555|FBN1_HUMAN Fibrillin-1 OS=Homo sapiens GN=FBN1 PE=1 SV=3	1	3	3	3	2	1	2	3	1	1	2	0	3	2	1	1	3	0	1	0	2	1	2	3	1	1	2	0	3	2	1	1	3	0	1	0	2	1	2	3	1	1
P35556;Q75N90	P35556	11;1	11;1	11;1	Fibrillin-2	FBN2	sp|P35556|FBN2_HUMAN Fibrillin-2 OS=Homo sapiens GN=FBN2 PE=1 SV=3	2	11	11	11	1	2	5	3	1	1	5	0	4	4	1	1	4	0	0	0	1	2	5	3	1	1	5	0	4	4	1	1	4	0	0	0	1	2	5	3	1	1
P35573	P35573	4	4	4	Glycogen debranching enzyme;4-alpha-glucanotransferase;Amylo-alpha-1,6-glucosidase	AGL	sp|P35573|GDE_HUMAN Glycogen debranching enzyme OS=Homo sapiens GN=AGL PE=1 SV=3	1	4	4	4	1	0	1	0	0	0	2	1	3	1	0	0	0	0	0	0	1	0	1	0	0	0	2	1	3	1	0	0	0	0	0	0	1	0	1	0	0	0
P35579	P35579	34	34	29	Myosin-9	MYH9	sp|P35579|MYH9_HUMAN Myosin-9 OS=Homo sapiens GN=MYH9 PE=1 SV=4	1	34	34	29	25	25	21	22	18	18	22	23	22	17	14	15	19	18	16	12	25	25	21	22	18	18	22	23	22	17	14	15	19	18	16	12	20	21	17	18	14	15
P35580;P35749	P35580	21;4	16;1	16;1	Myosin-10	MYH10	sp|P35580|MYH10_HUMAN Myosin-10 OS=Homo sapiens GN=MYH10 PE=1 SV=3	2	21	16	16	12	16	13	10	12	7	15	13	17	13	6	9	8	10	9	3	7	12	9	6	8	4	13	10	14	12	4	7	4	9	7	3	7	12	9	6	8	4
P35606	P35606	9	9	9	Coatomer subunit beta	COPB2	sp|P35606|COPB2_HUMAN Coatomer subunit beta OS=Homo sapiens GN=COPB2 PE=1 SV=2	1	9	9	9	4	5	5	5	4	3	4	6	5	2	3	4	4	4	1	1	4	5	5	5	4	3	4	6	5	2	3	4	4	4	1	1	4	5	5	5	4	3
P35610	P35610	2	2	2	Sterol O-acyltransferase 1	SOAT1	sp|P35610|SOAT1_HUMAN Sterol O-acyltransferase 1 OS=Homo sapiens GN=SOAT1 PE=1 SV=3	1	2	2	2	1	1	2	2	1	0	1	1	1	0	0	1	1	0	0	0	1	1	2	2	1	0	1	1	1	0	0	1	1	0	0	0	1	1	2	2	1	0
P35611	P35611	6	6	6	Alpha-adducin	ADD1	sp|P35611|ADDA_HUMAN Alpha-adducin OS=Homo sapiens GN=ADD1 PE=1 SV=2	1	6	6	6	2	2	2	1	0	0	2	2	1	3	2	1	1	1	1	0	2	2	2	1	0	0	2	2	1	3	2	1	1	1	1	0	2	2	2	1	0	0
P35613	P35613	4	4	4	Basigin	BSG	sp|P35613|BASI_HUMAN Basigin OS=Homo sapiens GN=BSG PE=1 SV=2	1	4	4	4	2	2	2	2	2	2	2	3	2	2	1	1	2	3	3	2	2	2	2	2	2	2	2	3	2	2	1	1	2	3	3	2	2	2	2	2	2	2
P35625	P35625	1	1	1	Metalloproteinase inhibitor 3	TIMP3	sp|P35625|TIMP3_HUMAN Metalloproteinase inhibitor 3 OS=Homo sapiens GN=TIMP3 PE=1 SV=2	1	1	1	1	1	1	1	1	1	1	1	1	1	1	1	1	1	0	1	0	1	1	1	1	1	1	1	1	1	1	1	1	1	0	1	0	1	1	1	1	1	1
P35637	P35637	6	6	5	RNA-binding protein FUS	FUS	sp|P35637|FUS_HUMAN RNA-binding protein FUS OS=Homo sapiens GN=FUS PE=1 SV=1	1	6	6	5	5	4	3	3	3	3	5	3	4	3	2	2	5	4	2	1	5	4	3	3	3	3	5	3	4	3	2	2	5	4	2	1	4	4	3	3	3	3
P35658	P35658	16	16	16	Nuclear pore complex protein Nup214	NUP214	sp|P35658|NU214_HUMAN Nuclear pore complex protein Nup214 OS=Homo sapiens GN=NUP214 PE=1 SV=2	1	16	16	16	8	8	7	5	3	5	8	7	7	8	3	3	6	4	4	0	8	8	7	5	3	5	8	7	7	8	3	3	6	4	4	0	8	8	7	5	3	5
P35754	P35754	2	2	2	Glutaredoxin-1	GLRX	sp|P35754|GLRX1_HUMAN Glutaredoxin-1 OS=Homo sapiens GN=GLRX PE=1 SV=2	1	2	2	2	0	1	0	1	1	1	1	1	1	1	0	1	1	0	2	1	0	1	0	1	1	1	1	1	1	1	0	1	1	0	2	1	0	1	0	1	1	1
P35790	P35790	1	1	1	Choline kinase alpha	CHKA	sp|P35790|CHKA_HUMAN Choline kinase alpha OS=Homo sapiens GN=CHKA PE=1 SV=3	1	1	1	1	0	0	0	0	0	0	0	0	1	0	0	0	0	0	0	0	0	0	0	0	0	0	0	0	1	0	0	0	0	0	0	0	0	0	0	0	0	0
P35813	P35813	1	1	1	Protein phosphatase 1A	PPM1A	sp|P35813|PPM1A_HUMAN Protein phosphatase 1A OS=Homo sapiens GN=PPM1A PE=1 SV=1	1	1	1	1	0	0	0	0	0	0	0	0	0	0	0	0	1	0	1	0	0	0	0	0	0	0	0	0	0	0	0	0	1	0	1	0	0	0	0	0	0	0
P35914	P35914	1	1	1	Hydroxymethylglutaryl-CoA lyase, mitochondrial	HMGCL	sp|P35914|HMGCL_HUMAN Hydroxymethylglutaryl-CoA lyase, mitochondrial OS=Homo sapiens GN=HMGCL PE=1 SV=2	1	1	1	1	0	1	0	1	0	0	1	1	1	1	0	0	0	0	0	0	0	1	0	1	0	0	1	1	1	1	0	0	0	0	0	0	0	1	0	1	0	0
P35998	P35998	2	2	2	26S protease regulatory subunit 7	PSMC2	sp|P35998|PRS7_HUMAN 26S protease regulatory subunit 7 OS=Homo sapiens GN=PSMC2 PE=1 SV=3	1	2	2	2	1	2	2	1	2	2	2	2	2	2	2	2	2	2	1	1	1	2	2	1	2	2	2	2	2	2	2	2	2	2	1	1	1	2	2	1	2	2
P36021	P36021	2	2	2	Monocarboxylate transporter 8	SLC16A2	sp|P36021|MOT8_HUMAN Monocarboxylate transporter 8 OS=Homo sapiens GN=SLC16A2 PE=1 SV=2	1	2	2	2	1	1	0	0	0	0	0	0	0	0	0	1	0	0	0	0	1	1	0	0	0	0	0	0	0	0	0	1	0	0	0	0	1	1	0	0	0	0
P36383	P36383	1	1	1	Gap junction gamma-1 protein	GJC1	sp|P36383|CXG1_HUMAN Gap junction gamma-1 protein OS=Homo sapiens GN=GJC1 PE=1 SV=2	1	1	1	1	0	0	1	1	0	0	0	0	1	0	0	0	1	0	1	0	0	0	1	1	0	0	0	0	1	0	0	0	1	0	1	0	0	0	1	1	0	0
P36404	P36404	1	1	1	ADP-ribosylation factor-like protein 2	ARL2	sp|P36404|ARL2_HUMAN ADP-ribosylation factor-like protein 2 OS=Homo sapiens GN=ARL2 PE=1 SV=4	1	1	1	1	1	1	1	1	1	1	1	0	0	1	1	1	1	0	1	0	1	1	1	1	1	1	1	0	0	1	1	1	1	0	1	0	1	1	1	1	1	1
P36405	P36405	2	2	2	ADP-ribosylation factor-like protein 3	ARL3	sp|P36405|ARL3_HUMAN ADP-ribosylation factor-like protein 3 OS=Homo sapiens GN=ARL3 PE=1 SV=2	1	2	2	2	0	0	0	0	1	0	0	0	0	0	1	1	1	2	0	0	0	0	0	0	1	0	0	0	0	0	1	1	1	2	0	0	0	0	0	0	1	0
P36507	P36507	6	6	5	Dual specificity mitogen-activated protein kinase kinase 2	MAP2K2	sp|P36507|MP2K2_HUMAN Dual specificity mitogen-activated protein kinase kinase 2 OS=Homo sapiens GN=MAP2K2 PE=1 SV=1	1	6	6	5	4	5	2	2	1	1	4	6	1	2	1	1	2	1	2	1	4	5	2	2	1	1	4	6	1	2	1	1	2	1	2	1	3	4	1	1	0	0
P36542	P36542	1	1	1	ATP synthase subunit gamma, mitochondrial	ATP5C1	sp|P36542|ATPG_HUMAN ATP synthase subunit gamma, mitochondrial OS=Homo sapiens GN=ATP5C1 PE=1 SV=1	1	1	1	1	1	1	1	1	1	1	1	1	1	0	1	1	1	1	1	1	1	1	1	1	1	1	1	1	1	0	1	1	1	1	1	1	1	1	1	1	1	1
P36543	P36543	1	1	1	V-type proton ATPase subunit E 1	ATP6V1E1	sp|P36543|VATE1_HUMAN V-type proton ATPase subunit E 1 OS=Homo sapiens GN=ATP6V1E1 PE=1 SV=1	1	1	1	1	0	0	0	0	0	0	0	0	0	0	0	0	0	1	0	0	0	0	0	0	0	0	0	0	0	0	0	0	0	1	0	0	0	0	0	0	0	0
P36578	P36578	1	1	1	60S ribosomal protein L4	RPL4	sp|P36578|RL4_HUMAN 60S ribosomal protein L4 OS=Homo sapiens GN=RPL4 PE=1 SV=5	1	1	1	1	1	1	1	1	1	0	1	1	1	1	1	1	1	1	1	0	1	1	1	1	1	0	1	1	1	1	1	1	1	1	1	0	1	1	1	1	1	0
P36639	P36639	1	1	1	7,8-dihydro-8-oxoguanine triphosphatase	NUDT1	sp|P36639|8ODP_HUMAN 7,8-dihydro-8-oxoguanine triphosphatase OS=Homo sapiens GN=NUDT1 PE=1 SV=3	1	1	1	1	0	0	0	0	0	0	0	1	0	0	0	0	0	1	0	0	0	0	0	0	0	0	0	1	0	0	0	0	0	1	0	0	0	0	0	0	0	0
P36776	P36776	8	8	8	Lon protease homolog, mitochondrial	LONP1	sp|P36776|LONM_HUMAN Lon protease homolog, mitochondrial OS=Homo sapiens GN=LONP1 PE=1 SV=2	1	8	8	8	5	4	6	6	2	2	6	7	6	5	3	3	4	5	4	3	5	4	6	6	2	2	6	7	6	5	3	3	4	5	4	3	5	4	6	6	2	2
P36871	P36871	3	3	3	Phosphoglucomutase-1	PGM1	sp|P36871|PGM1_HUMAN Phosphoglucomutase-1 OS=Homo sapiens GN=PGM1 PE=1 SV=3	1	3	3	3	2	1	1	0	0	0	1	3	2	2	0	0	0	0	0	0	2	1	1	0	0	0	1	3	2	2	0	0	0	0	0	0	2	1	1	0	0	0
P36873;P62136	P36873;P62136	5;5	5;5	3;3	Serine/threonine-protein phosphatase PP1-gamma catalytic subunit;Serine/threonine-protein phosphatase PP1-alpha catalytic subunit	PPP1CC;PPP1CA	sp|P36873|PP1G_HUMAN Serine/threonine-protein phosphatase PP1-gamma catalytic subunit OS=Homo sapiens GN=PPP1CC PE=1 SV=1;sp|P62136|PP1A_HUMAN Serine/threonine-protein phosphatase PP1-alpha catalytic subunit OS=Homo sapiens GN=PPP1CA PE=1 SV=1	2	5	5	3	3	4	2	3	4	3	5	5	5	4	4	3	5	5	3	2	3	4	2	3	4	3	5	5	5	4	4	3	5	5	3	2	2	3	1	1	3	2
P36897	P36897	2	2	2	TGF-beta receptor type-1	TGFBR1	sp|P36897|TGFR1_HUMAN TGF-beta receptor type-1 OS=Homo sapiens GN=TGFBR1 PE=1 SV=1	1	2	2	2	0	1	0	0	0	0	0	0	1	1	1	1	0	0	0	0	0	1	0	0	0	0	0	0	1	1	1	1	0	0	0	0	0	1	0	0	0	0
P36915	P36915	5	5	5	Guanine nucleotide-binding protein-like 1	GNL1	sp|P36915|GNL1_HUMAN Guanine nucleotide-binding protein-like 1 OS=Homo sapiens GN=GNL1 PE=1 SV=2	1	5	5	5	1	1	1	1	1	1	3	2	2	1	0	1	2	1	0	0	1	1	1	1	1	1	3	2	2	1	0	1	2	1	0	0	1	1	1	1	1	1
P36954	P36954	1	1	1	DNA-directed RNA polymerase II subunit RPB9	POLR2I	sp|P36954|RPB9_HUMAN DNA-directed RNA polymerase II subunit RPB9 OS=Homo sapiens GN=POLR2I PE=1 SV=1	1	1	1	1	0	0	0	0	0	0	0	0	0	0	0	0	1	0	0	0	0	0	0	0	0	0	0	0	0	0	0	0	1	0	0	0	0	0	0	0	0	0
P36957	P36957	4	4	4	Dihydrolipoyllysine-residue succinyltransferase component of 2-oxoglutarate dehydrogenase complex, mitochondrial	DLST	sp|P36957|ODO2_HUMAN Dihydrolipoyllysine-residue succinyltransferase component of 2-oxoglutarate dehydrogenase complex, mitochondrial OS=Homo sapiens GN=DLST PE=1 SV=4	1	4	4	4	3	4	3	2	2	2	3	3	2	2	3	3	2	2	2	0	3	4	3	2	2	2	3	3	2	2	3	3	2	2	2	0	3	4	3	2	2	2
P37198	P37198	4	4	4	Nuclear pore glycoprotein p62	NUP62	sp|P37198|NUP62_HUMAN Nuclear pore glycoprotein p62 OS=Homo sapiens GN=NUP62 PE=1 SV=3	1	4	4	4	1	1	1	1	0	1	2	1	2	1	1	2	1	3	2	0	1	1	1	1	0	1	2	1	2	1	1	2	1	3	2	0	1	1	1	1	0	1
P37235	P37235	1	1	1	Hippocalcin-like protein 1	HPCAL1	sp|P37235|HPCL1_HUMAN Hippocalcin-like protein 1 OS=Homo sapiens GN=HPCAL1 PE=1 SV=3	1	1	1	1	1	1	1	1	0	0	1	1	1	0	0	0	1	0	1	0	1	1	1	1	0	0	1	1	1	0	0	0	1	0	1	0	1	1	1	1	0	0
P37268	P37268	2	2	2	Squalene synthase	FDFT1	sp|P37268|FDFT_HUMAN Squalene synthase OS=Homo sapiens GN=FDFT1 PE=1 SV=1	1	2	2	2	2	1	1	0	1	1	1	1	1	1	1	1	1	1	1	0	2	1	1	0	1	1	1	1	1	1	1	1	1	1	1	0	2	1	1	0	1	1
P37802	P37802	3	3	3	Transgelin-2	TAGLN2	sp|P37802|TAGL2_HUMAN Transgelin-2 OS=Homo sapiens GN=TAGLN2 PE=1 SV=3	1	3	3	3	3	3	2	2	3	3	3	3	2	3	2	2	3	3	3	2	3	3	2	2	3	3	3	3	2	3	2	2	3	3	3	2	3	3	2	2	3	3
P37837	P37837	1	1	1	Transaldolase	TALDO1	sp|P37837|TALDO_HUMAN Transaldolase OS=Homo sapiens GN=TALDO1 PE=1 SV=2	1	1	1	1	1	1	1	1	1	1	1	1	1	1	0	1	1	0	0	0	1	1	1	1	1	1	1	1	1	1	0	1	1	0	0	0	1	1	1	1	1	1
P37840	P37840	1	1	1	Alpha-synuclein	SNCA	sp|P37840|SYUA_HUMAN Alpha-synuclein OS=Homo sapiens GN=SNCA PE=1 SV=1	1	1	1	1	1	1	1	1	0	0	0	0	1	0	0	0	0	0	0	0	1	1	1	1	0	0	0	0	1	0	0	0	0	0	0	0	1	1	1	1	0	0
P38117	P38117	2	2	2	Electron transfer flavoprotein subunit beta	ETFB	sp|P38117|ETFB_HUMAN Electron transfer flavoprotein subunit beta OS=Homo sapiens GN=ETFB PE=1 SV=3	1	2	2	2	1	1	1	1	1	0	1	2	2	2	0	1	2	1	0	0	1	1	1	1	1	0	1	2	2	2	0	1	2	1	0	0	1	1	1	1	1	0
Q96E39;P38159	Q96E39;P38159	2;2	2;2	2;2	RNA binding motif protein, X-linked-like-1;RNA-binding motif protein, X chromosome;RNA-binding motif protein, X chromosome, N-terminally processed	RBMXL1;RBMX	sp|Q96E39|RMXL1_HUMAN RNA binding motif protein, X-linked-like-1 OS=Homo sapiens GN=RBMXL1 PE=1 SV=1;sp|P38159|RBMX_HUMAN RNA-binding motif protein, X chromosome OS=Homo sapiens GN=RBMX PE=1 SV=3	2	2	2	2	1	2	1	1	0	0	1	1	1	1	0	0	0	1	1	0	1	2	1	1	0	0	1	1	1	1	0	0	0	1	1	0	1	2	1	1	0	0
P38432	P38432	3	3	3	Coilin	COIL	sp|P38432|COIL_HUMAN Coilin OS=Homo sapiens GN=COIL PE=1 SV=1	1	3	3	3	0	0	0	0	0	0	0	1	1	0	0	0	1	1	0	0	0	0	0	0	0	0	0	1	1	0	0	0	1	1	0	0	0	0	0	0	0	0
P38571	P38571	3	3	3	Lysosomal acid lipase/cholesteryl ester hydrolase	LIPA	sp|P38571|LICH_HUMAN Lysosomal acid lipase/cholesteryl ester hydrolase OS=Homo sapiens GN=LIPA PE=1 SV=2	1	3	3	3	0	1	0	1	0	0	1	3	1	1	0	0	0	0	0	0	0	1	0	1	0	0	1	3	1	1	0	0	0	0	0	0	0	1	0	1	0	0
P38606	P38606	6	6	6	V-type proton ATPase catalytic subunit A	ATP6V1A	sp|P38606|VATA_HUMAN V-type proton ATPase catalytic subunit A OS=Homo sapiens GN=ATP6V1A PE=1 SV=2	1	6	6	6	3	2	2	3	0	0	3	3	3	4	1	1	3	1	2	0	3	2	2	3	0	0	3	3	3	4	1	1	3	1	2	0	3	2	2	3	0	0
P38646	P38646	9	9	9	Stress-70 protein, mitochondrial	HSPA9	sp|P38646|GRP75_HUMAN Stress-70 protein, mitochondrial OS=Homo sapiens GN=HSPA9 PE=1 SV=2	1	9	9	9	4	3	5	7	2	2	6	6	6	5	5	4	5	4	0	1	4	3	5	7	2	2	6	6	6	5	5	4	5	4	0	1	4	3	5	7	2	2
P38919	P38919	5	5	5	Eukaryotic initiation factor 4A-III;Eukaryotic initiation factor 4A-III, N-terminally processed	EIF4A3	sp|P38919|IF4A3_HUMAN Eukaryotic initiation factor 4A-III OS=Homo sapiens GN=EIF4A3 PE=1 SV=4	1	5	5	5	3	3	5	4	2	2	4	4	4	3	3	3	2	3	2	0	3	3	5	4	2	2	4	4	4	3	3	3	2	3	2	0	3	3	5	4	2	2
P38935	P38935	5	5	5	DNA-binding protein SMUBP-2	IGHMBP2	sp|P38935|SMBP2_HUMAN DNA-binding protein SMUBP-2 OS=Homo sapiens GN=IGHMBP2 PE=1 SV=3	1	5	5	5	1	0	2	2	1	0	3	1	1	2	1	1	3	0	2	0	1	0	2	2	1	0	3	1	1	2	1	1	3	0	2	0	1	0	2	2	1	0
P39023	P39023	5	5	5	60S ribosomal protein L3	RPL3	sp|P39023|RL3_HUMAN 60S ribosomal protein L3 OS=Homo sapiens GN=RPL3 PE=1 SV=2	1	5	5	5	4	3	3	4	1	2	4	3	3	4	1	3	3	3	1	0	4	3	3	4	1	2	4	3	3	4	1	3	3	3	1	0	4	3	3	4	1	2
P39060	P39060	1	1	1	Collagen alpha-1(XVIII) chain;Endostatin	COL18A1	sp|P39060|COIA1_HUMAN Collagen alpha-1(XVIII) chain OS=Homo sapiens GN=COL18A1 PE=1 SV=5	1	1	1	1	0	0	1	0	0	0	0	0	1	1	0	0	0	0	1	0	0	0	1	0	0	0	0	0	1	1	0	0	0	0	1	0	0	0	1	0	0	0
P39210	P39210	2	2	2	Protein Mpv17	MPV17	sp|P39210|MPV17_HUMAN Protein Mpv17 OS=Homo sapiens GN=MPV17 PE=1 SV=1	1	2	2	2	1	1	0	1	0	0	2	2	0	0	0	0	0	1	0	0	1	1	0	1	0	0	2	2	0	0	0	0	0	1	0	0	1	1	0	1	0	0
P39656	P39656	7	7	7	Dolichyl-diphosphooligosaccharide--protein glycosyltransferase 48 kDa subunit	DDOST	sp|P39656|OST48_HUMAN Dolichyl-diphosphooligosaccharide--protein glycosyltransferase 48 kDa subunit OS=Homo sapiens GN=DDOST PE=1 SV=4	1	7	7	7	6	5	5	4	3	4	7	6	5	6	4	3	2	4	3	1	6	5	5	4	3	4	7	6	5	6	4	3	2	4	3	1	6	5	5	4	3	4
P39687;Q92688	P39687	3;1	3;1	3;1	Acidic leucine-rich nuclear phosphoprotein 32 family member A	ANP32A	sp|P39687|AN32A_HUMAN Acidic leucine-rich nuclear phosphoprotein 32 family member A OS=Homo sapiens GN=ANP32A PE=1 SV=1	2	3	3	3	1	1	1	1	1	1	3	1	2	2	0	1	1	1	0	0	1	1	1	1	1	1	3	1	2	2	0	1	1	1	0	0	1	1	1	1	1	1
P39748	P39748	6	6	6	Flap endonuclease 1	FEN1	sp|P39748|FEN1_HUMAN Flap endonuclease 1 OS=Homo sapiens GN=FEN1 PE=1 SV=1	1	6	6	6	4	4	5	5	2	5	4	5	5	4	2	4	4	4	3	2	4	4	5	5	2	5	4	5	5	4	2	4	4	4	3	2	4	4	5	5	2	5
P39880	P39880	3	3	3	Homeobox protein cut-like 1	CUX1	sp|P39880|CUX1_HUMAN Homeobox protein cut-like 1 OS=Homo sapiens GN=CUX1 PE=1 SV=3	1	3	3	3	1	1	0	1	0	0	0	0	0	1	0	0	0	0	0	0	1	1	0	1	0	0	0	0	0	1	0	0	0	0	0	0	1	1	0	1	0	0
P40121	P40121	1	1	1	Macrophage-capping protein	CAPG	sp|P40121|CAPG_HUMAN Macrophage-capping protein OS=Homo sapiens GN=CAPG PE=1 SV=2	1	1	1	1	0	0	0	0	0	0	0	0	1	0	0	0	0	0	0	0	0	0	0	0	0	0	0	0	1	0	0	0	0	0	0	0	0	0	0	0	0	0
P40123	P40123	3	3	3	Adenylyl cyclase-associated protein 2	CAP2	sp|P40123|CAP2_HUMAN Adenylyl cyclase-associated protein 2 OS=Homo sapiens GN=CAP2 PE=1 SV=1	1	3	3	3	1	1	0	1	0	1	2	3	2	1	0	0	0	2	1	0	1	1	0	1	0	1	2	3	2	1	0	0	0	2	1	0	1	1	0	1	0	1
P40189	P40189	5	5	5	Interleukin-6 receptor subunit beta	IL6ST	sp|P40189|IL6RB_HUMAN Interleukin-6 receptor subunit beta OS=Homo sapiens GN=IL6ST PE=1 SV=2	1	5	5	5	0	1	2	1	0	0	0	1	1	1	0	0	0	1	1	0	0	1	2	1	0	0	0	1	1	1	0	0	0	1	1	0	0	1	2	1	0	0
P40222	P40222	6	6	6	Alpha-taxilin	TXLNA	sp|P40222|TXLNA_HUMAN Alpha-taxilin OS=Homo sapiens GN=TXLNA PE=1 SV=3	1	6	6	6	1	3	2	3	3	2	3	3	4	5	1	1	4	3	1	0	1	3	2	3	3	2	3	3	4	5	1	1	4	3	1	0	1	3	2	3	3	2
P40227	P40227	10	10	10	T-complex protein 1 subunit zeta	CCT6A	sp|P40227|TCPZ_HUMAN T-complex protein 1 subunit zeta OS=Homo sapiens GN=CCT6A PE=1 SV=3	1	10	10	10	3	5	4	4	2	2	4	9	4	3	2	2	3	6	3	1	3	5	4	4	2	2	4	9	4	3	2	2	3	6	3	1	3	5	4	4	2	2
P40261	P40261	5	5	5	Nicotinamide N-methyltransferase	NNMT	sp|P40261|NNMT_HUMAN Nicotinamide N-methyltransferase OS=Homo sapiens GN=NNMT PE=1 SV=1	1	5	5	5	3	1	2	2	2	1	2	3	3	4	1	2	3	2	2	0	3	1	2	2	2	1	2	3	3	4	1	2	3	2	2	0	3	1	2	2	2	1
P40616	P40616	3	3	3	ADP-ribosylation factor-like protein 1	ARL1	sp|P40616|ARL1_HUMAN ADP-ribosylation factor-like protein 1 OS=Homo sapiens GN=ARL1 PE=1 SV=1	1	3	3	3	1	2	2	1	0	2	2	1	1	1	3	1	2	2	2	1	1	2	2	1	0	2	2	1	1	1	3	1	2	2	2	1	1	2	2	1	0	2
P40692	P40692	1	1	1	DNA mismatch repair protein Mlh1	MLH1	sp|P40692|MLH1_HUMAN DNA mismatch repair protein Mlh1 OS=Homo sapiens GN=MLH1 PE=1 SV=1	1	1	1	1	0	0	0	0	0	0	0	0	1	0	0	0	0	0	0	0	0	0	0	0	0	0	0	0	1	0	0	0	0	0	0	0	0	0	0	0	0	0
P40763	P40763	7	7	6	Signal transducer and activator of transcription 3	STAT3	sp|P40763|STAT3_HUMAN Signal transducer and activator of transcription 3 OS=Homo sapiens GN=STAT3 PE=1 SV=2	1	7	7	6	1	3	1	1	1	1	3	4	0	2	1	0	0	0	0	0	1	3	1	1	1	1	3	4	0	2	1	0	0	0	0	0	1	3	1	1	1	1
P40818	P40818	2	2	2	Ubiquitin carboxyl-terminal hydrolase 8	USP8	sp|P40818|UBP8_HUMAN Ubiquitin carboxyl-terminal hydrolase 8 OS=Homo sapiens GN=USP8 PE=1 SV=1	1	2	2	2	0	0	0	0	0	0	0	0	1	0	0	0	1	0	0	0	0	0	0	0	0	0	0	0	1	0	0	0	1	0	0	0	0	0	0	0	0	0
P40855	P40855	5	5	5	Peroxisomal biogenesis factor 19	PEX19	sp|P40855|PEX19_HUMAN Peroxisomal biogenesis factor 19 OS=Homo sapiens GN=PEX19 PE=1 SV=1	1	5	5	5	3	3	4	3	2	1	3	2	3	3	2	2	2	1	2	0	3	3	4	3	2	1	3	2	3	3	2	2	2	1	2	0	3	3	4	3	2	1
P40925	P40925	2	2	2	Malate dehydrogenase, cytoplasmic	MDH1	sp|P40925|MDHC_HUMAN Malate dehydrogenase, cytoplasmic OS=Homo sapiens GN=MDH1 PE=1 SV=4	1	2	2	2	0	0	0	0	0	1	0	1	0	0	0	0	0	1	0	0	0	0	0	0	0	1	0	1	0	0	0	0	0	1	0	0	0	0	0	0	0	1
P40926	P40926	2	2	2	Malate dehydrogenase, mitochondrial	MDH2	sp|P40926|MDHM_HUMAN Malate dehydrogenase, mitochondrial OS=Homo sapiens GN=MDH2 PE=1 SV=3	1	2	2	2	1	1	1	1	1	1	1	2	1	2	0	1	2	2	0	0	1	1	1	1	1	1	1	2	1	2	0	1	2	2	0	0	1	1	1	1	1	1
P40937	P40937	3	3	3	Replication factor C subunit 5	RFC5	sp|P40937|RFC5_HUMAN Replication factor C subunit 5 OS=Homo sapiens GN=RFC5 PE=1 SV=1	1	3	3	3	1	1	0	0	1	1	1	2	2	2	0	1	2	1	1	1	1	1	0	0	1	1	1	2	2	2	0	1	2	1	1	1	1	1	0	0	1	1
P40938	P40938	4	4	4	Replication factor C subunit 3	RFC3	sp|P40938|RFC3_HUMAN Replication factor C subunit 3 OS=Homo sapiens GN=RFC3 PE=1 SV=2	1	4	4	4	2	1	2	2	1	1	2	4	2	1	0	0	1	1	1	1	2	1	2	2	1	1	2	4	2	1	0	0	1	1	1	1	2	1	2	2	1	1
P40939	P40939	8	8	8	Trifunctional enzyme subunit alpha, mitochondrial;Long-chain enoyl-CoA hydratase;Long chain 3-hydroxyacyl-CoA dehydrogenase	HADHA	sp|P40939|ECHA_HUMAN Trifunctional enzyme subunit alpha, mitochondrial OS=Homo sapiens GN=HADHA PE=1 SV=2	1	8	8	8	5	3	5	6	5	2	5	7	7	7	3	3	5	7	3	2	5	3	5	6	5	2	5	7	7	7	3	3	5	7	3	2	5	3	5	6	5	2
P41091;Q2VIR3	P41091;Q2VIR3	3;2	3;2	3;2	Eukaryotic translation initiation factor 2 subunit 3;Putative eukaryotic translation initiation factor 2 subunit 3-like protein	EIF2S3;EIF2S3L	sp|P41091|IF2G_HUMAN Eukaryotic translation initiation factor 2 subunit 3 OS=Homo sapiens GN=EIF2S3 PE=1 SV=3;sp|Q2VIR3|IF2GL_HUMAN Putative eukaryotic translation initiation factor 2 subunit 3-like protein OS=Homo sapiens GN=EIF2S3L PE=5 SV=2	2	3	3	3	3	3	2	2	1	2	2	3	2	2	2	2	2	3	2	1	3	3	2	2	1	2	2	3	2	2	2	2	2	3	2	1	3	3	2	2	1	2
P41208	P41208	2	2	2	Centrin-2	CETN2	sp|P41208|CETN2_HUMAN Centrin-2 OS=Homo sapiens GN=CETN2 PE=1 SV=1	1	2	2	2	1	1	1	1	1	1	1	1	1	1	1	0	0	1	1	0	1	1	1	1	1	1	1	1	1	1	1	0	0	1	1	0	1	1	1	1	1	1
P41214	P41214	6	6	6	Eukaryotic translation initiation factor 2D	EIF2D	sp|P41214|EIF2D_HUMAN Eukaryotic translation initiation factor 2D OS=Homo sapiens GN=EIF2D PE=1 SV=3	1	6	6	6	2	2	2	0	1	0	3	2	3	3	0	0	1	0	0	0	2	2	2	0	1	0	3	2	3	3	0	0	1	0	0	0	2	2	2	0	1	0
P41221	P41221	3	2	2	Protein Wnt-5a	WNT5A	sp|P41221|WNT5A_HUMAN Protein Wnt-5a OS=Homo sapiens GN=WNT5A PE=1 SV=2	1	3	2	2	1	2	1	1	1	1	0	0	2	1	2	2	2	1	1	0	1	2	1	1	1	1	0	0	1	0	2	2	2	1	1	0	1	2	1	1	1	1
P41223	P41223	2	2	2	Protein BUD31 homolog	BUD31	sp|P41223|BUD31_HUMAN Protein BUD31 homolog OS=Homo sapiens GN=BUD31 PE=1 SV=2	1	2	2	2	1	1	1	0	1	1	1	1	1	1	1	1	2	1	1	1	1	1	1	0	1	1	1	1	1	1	1	1	2	1	1	1	1	1	1	0	1	1
P41227	P41227	2	2	2	N-alpha-acetyltransferase 10	NAA10	sp|P41227|NAA10_HUMAN N-alpha-acetyltransferase 10 OS=Homo sapiens GN=NAA10 PE=1 SV=1	1	2	2	2	1	0	0	0	0	0	0	0	1	1	0	0	0	1	0	0	1	0	0	0	0	0	0	0	1	1	0	0	0	1	0	0	1	0	0	0	0	0
Q9BY66;P41229	Q9BY66;P41229	1;1	1;1	1;1	Lysine-specific demethylase 5D;Lysine-specific demethylase 5C	KDM5D;KDM5C	sp|Q9BY66|KDM5D_HUMAN Lysine-specific demethylase 5D OS=Homo sapiens GN=KDM5D PE=1 SV=2;sp|P41229|KDM5C_HUMAN Lysine-specific demethylase 5C OS=Homo sapiens GN=KDM5C PE=1 SV=2	2	1	1	1	0	0	0	0	0	0	0	0	1	0	0	0	0	0	0	0	0	0	0	0	0	0	0	0	1	0	0	0	0	0	0	0	0	0	0	0	0	0
Q6NXS1;P41236	Q6NXS1;P41236	1;1	1;1	1;1	Protein phosphatase inhibitor 2-like protein 3;Protein phosphatase inhibitor 2	PPP1R2P3;PPP1R2	sp|Q6NXS1|IPP2M_HUMAN Protein phosphatase inhibitor 2-like protein 3 OS=Homo sapiens GN=PPP1R2P3 PE=1 SV=1;sp|P41236|IPP2_HUMAN Protein phosphatase inhibitor 2 OS=Homo sapiens GN=PPP1R2 PE=1 SV=2	2	1	1	1	0	0	0	1	0	0	0	0	1	0	0	0	0	0	0	0	0	0	0	1	0	0	0	0	1	0	0	0	0	0	0	0	0	0	0	1	0	0
P41240	P41240	1	1	1	Tyrosine-protein kinase CSK	CSK	sp|P41240|CSK_HUMAN Tyrosine-protein kinase CSK OS=Homo sapiens GN=CSK PE=1 SV=1	1	1	1	1	1	1	1	0	0	0	0	0	0	0	1	0	1	0	1	0	1	1	1	0	0	0	0	0	0	0	1	0	1	0	1	0	1	1	1	0	0	0
P41250	P41250	11	11	11	Glycine--tRNA ligase	GARS	sp|P41250|SYG_HUMAN Glycine--tRNA ligase OS=Homo sapiens GN=GARS PE=1 SV=3	1	11	11	11	5	6	6	6	3	5	5	6	6	7	1	2	5	5	3	3	5	6	6	6	3	5	5	6	6	7	1	2	5	5	3	3	5	6	6	6	3	5
P41252	P41252	15	15	14	Isoleucine--tRNA ligase, cytoplasmic	IARS	sp|P41252|SYIC_HUMAN Isoleucine--tRNA ligase, cytoplasmic OS=Homo sapiens GN=IARS PE=1 SV=2	1	15	15	14	8	7	5	2	3	5	7	6	4	5	3	4	6	6	2	1	8	7	5	2	3	5	7	6	4	5	3	4	6	6	2	1	8	7	5	2	3	5
P41743	P41743	6	6	6	Protein kinase C iota type	PRKCI	sp|P41743|KPCI_HUMAN Protein kinase C iota type OS=Homo sapiens GN=PRKCI PE=1 SV=2	1	6	6	6	3	4	2	2	1	2	2	4	3	4	1	2	3	2	3	0	3	4	2	2	1	2	2	4	3	4	1	2	3	2	3	0	3	4	2	2	1	2
P42025	P42025	2	2	2	Beta-centractin	ACTR1B	sp|P42025|ACTY_HUMAN Beta-centractin OS=Homo sapiens GN=ACTR1B PE=1 SV=1	1	2	2	2	1	1	0	1	1	1	1	1	2	1	0	1	0	2	0	0	1	1	0	1	1	1	1	1	2	1	0	1	0	2	0	0	1	1	0	1	1	1
P42126	P42126	3	3	3	Enoyl-CoA delta isomerase 1, mitochondrial	ECI1	sp|P42126|ECI1_HUMAN Enoyl-CoA delta isomerase 1, mitochondrial OS=Homo sapiens GN=ECI1 PE=1 SV=1	1	3	3	3	2	2	2	2	0	0	2	3	2	2	0	0	2	1	0	0	2	2	2	2	0	0	2	3	2	2	0	0	2	1	0	0	2	2	2	2	0	0
P42166	P42166	11	11	7	Lamina-associated polypeptide 2, isoform alpha;Thymopoietin;Thymopentin	TMPO	sp|P42166|LAP2A_HUMAN Lamina-associated polypeptide 2, isoform alpha OS=Homo sapiens GN=TMPO PE=1 SV=2	1	11	11	7	7	9	7	7	6	6	6	6	8	7	5	5	9	7	6	2	7	9	7	7	6	6	6	6	8	7	5	5	9	7	6	2	3	5	3	3	4	3
P42167	P42167	8	4	4	Lamina-associated polypeptide 2, isoforms beta/gamma;Thymopoietin;Thymopentin	TMPO	sp|P42167|LAP2B_HUMAN Lamina-associated polypeptide 2, isoforms beta/gamma OS=Homo sapiens GN=TMPO PE=1 SV=2	1	8	4	4	7	7	7	7	5	5	6	6	7	6	4	5	6	6	6	1	3	3	3	3	3	2	3	4	3	3	1	3	3	3	3	0	3	3	3	3	3	2
P42224	P42224	5	5	5	Signal transducer and activator of transcription 1-alpha/beta	STAT1	sp|P42224|STAT1_HUMAN Signal transducer and activator of transcription 1-alpha/beta OS=Homo sapiens GN=STAT1 PE=1 SV=2	1	5	5	5	3	2	1	1	1	0	3	5	3	2	1	1	3	2	0	0	3	2	1	1	1	0	3	5	3	2	1	1	3	2	0	0	3	2	1	1	1	0
P42285	P42285	7	7	7	Superkiller viralicidic activity 2-like 2	SKIV2L2	sp|P42285|SK2L2_HUMAN Superkiller viralicidic activity 2-like 2 OS=Homo sapiens GN=SKIV2L2 PE=1 SV=3	1	7	7	7	5	5	5	5	3	4	6	6	6	5	3	3	4	4	6	0	5	5	5	5	3	4	6	6	6	5	3	3	4	4	6	0	5	5	5	5	3	4
P42345	P42345	9	9	9	Serine/threonine-protein kinase mTOR	MTOR	sp|P42345|MTOR_HUMAN Serine/threonine-protein kinase mTOR OS=Homo sapiens GN=MTOR PE=1 SV=1	1	9	9	9	1	2	1	0	1	0	2	2	2	2	0	1	1	1	2	0	1	2	1	0	1	0	2	2	2	2	0	1	1	1	2	0	1	2	1	0	1	0
P42356;A4QPH2	P42356	7;1	7;1	7;1	Phosphatidylinositol 4-kinase alpha	PI4KA	sp|P42356|PI4KA_HUMAN Phosphatidylinositol 4-kinase alpha OS=Homo sapiens GN=PI4KA PE=1 SV=4	2	7	7	7	3	2	1	2	1	0	1	3	3	2	0	1	3	0	1	0	3	2	1	2	1	0	1	3	3	2	0	1	3	0	1	0	3	2	1	2	1	0
P42566	P42566	5	5	5	Epidermal growth factor receptor substrate 15	EPS15	sp|P42566|EPS15_HUMAN Epidermal growth factor receptor substrate 15 OS=Homo sapiens GN=EPS15 PE=1 SV=2	1	5	5	5	3	3	4	5	1	1	3	3	4	3	2	2	2	2	3	0	3	3	4	5	1	1	3	3	4	3	2	2	2	2	3	0	3	3	4	5	1	1
P42574	P42574	3	3	3	Caspase-3;Caspase-3 subunit p17;Caspase-3 subunit p12	CASP3	sp|P42574|CASP3_HUMAN Caspase-3 OS=Homo sapiens GN=CASP3 PE=1 SV=2	1	3	3	3	1	1	0	0	0	0	0	0	2	0	1	0	1	0	0	0	1	1	0	0	0	0	0	0	2	0	1	0	1	0	0	0	1	1	0	0	0	0
P42575	P42575	1	1	1	Caspase-2;Caspase-2 subunit p18;Caspase-2 subunit p13;Caspase-2 subunit p12	CASP2	sp|P42575|CASP2_HUMAN Caspase-2 OS=Homo sapiens GN=CASP2 PE=1 SV=2	1	1	1	1	0	1	0	1	0	0	0	0	0	1	0	0	0	0	0	0	0	1	0	1	0	0	0	0	0	1	0	0	0	0	0	0	0	1	0	1	0	0
P42694	P42694	3	3	3	Probable helicase with zinc finger domain	HELZ	sp|P42694|HELZ_HUMAN Probable helicase with zinc finger domain OS=Homo sapiens GN=HELZ PE=1 SV=2	1	3	3	3	0	0	0	1	0	0	0	0	0	1	0	1	0	0	2	0	0	0	0	1	0	0	0	0	0	1	0	1	0	0	2	0	0	0	0	1	0	0
P42695	P42695	6	6	6	Condensin-2 complex subunit D3	NCAPD3	sp|P42695|CNDD3_HUMAN Condensin-2 complex subunit D3 OS=Homo sapiens GN=NCAPD3 PE=1 SV=2	1	6	6	6	2	3	4	2	1	0	1	1	3	1	1	1	0	1	1	0	2	3	4	2	1	0	1	1	3	1	1	1	0	1	1	0	2	3	4	2	1	0
P42696	P42696	1	1	1	RNA-binding protein 34	RBM34	sp|P42696|RBM34_HUMAN RNA-binding protein 34 OS=Homo sapiens GN=RBM34 PE=1 SV=2	1	1	1	1	1	1	1	1	0	1	1	0	1	1	1	1	1	0	0	1	1	1	1	1	0	1	1	0	1	1	1	1	1	0	0	1	1	1	1	1	0	1
P42704	P42704	12	12	12	Leucine-rich PPR motif-containing protein, mitochondrial	LRPPRC	sp|P42704|LPPRC_HUMAN Leucine-rich PPR motif-containing protein, mitochondrial OS=Homo sapiens GN=LRPPRC PE=1 SV=3	1	12	12	12	8	7	8	6	4	4	9	10	7	8	6	8	7	8	4	2	8	7	8	6	4	4	9	10	7	8	6	8	7	8	4	2	8	7	8	6	4	4
P42765	P42765	9	9	9	3-ketoacyl-CoA thiolase, mitochondrial	ACAA2	sp|P42765|THIM_HUMAN 3-ketoacyl-CoA thiolase, mitochondrial OS=Homo sapiens GN=ACAA2 PE=1 SV=2	1	9	9	9	3	4	4	3	3	1	5	5	4	4	1	3	3	4	3	1	3	4	4	3	3	1	5	5	4	4	1	3	3	4	3	1	3	4	4	3	3	1
P42771;P42772	P42771;P42772	2;1	2;1	2;1	Cyclin-dependent kinase inhibitor 2A;Cyclin-dependent kinase 4 inhibitor B	CDKN2A;CDKN2B	sp|P42771|CDN2A_HUMAN Cyclin-dependent kinase inhibitor 2A OS=Homo sapiens GN=CDKN2A PE=1 SV=2;sp|P42772|CDN2B_HUMAN Cyclin-dependent kinase 4 inhibitor B OS=Homo sapiens GN=CDKN2B PE=1 SV=1	2	2	2	2	1	2	1	2	2	2	2	2	2	1	0	1	2	0	1	0	1	2	1	2	2	2	2	2	2	1	0	1	2	0	1	0	1	2	1	2	2	2
P42858	P42858	3	3	3	Huntingtin	HTT	sp|P42858|HD_HUMAN Huntingtin OS=Homo sapiens GN=HTT PE=1 SV=2	1	3	3	3	2	1	1	2	0	0	1	0	2	1	2	1	1	0	1	0	2	1	1	2	0	0	1	0	2	1	2	1	1	0	1	0	2	1	1	2	0	0
P42892	P42892	6	6	6	Endothelin-converting enzyme 1	ECE1	sp|P42892|ECE1_HUMAN Endothelin-converting enzyme 1 OS=Homo sapiens GN=ECE1 PE=1 SV=2	1	6	6	6	1	1	2	2	2	1	1	1	1	3	0	1	0	2	0	0	1	1	2	2	2	1	1	1	1	3	0	1	0	2	0	0	1	1	2	2	2	1
P43007	P43007	1	1	1	Neutral amino acid transporter A	SLC1A4	sp|P43007|SATT_HUMAN Neutral amino acid transporter A OS=Homo sapiens GN=SLC1A4 PE=1 SV=1	1	1	1	1	1	1	1	1	1	0	1	1	1	1	1	1	1	1	0	0	1	1	1	1	1	0	1	1	1	1	1	1	1	1	0	0	1	1	1	1	1	0
P43034	P43034	2	2	2	Platelet-activating factor acetylhydrolase IB subunit alpha	PAFAH1B1	sp|P43034|LIS1_HUMAN Platelet-activating factor acetylhydrolase IB subunit alpha OS=Homo sapiens GN=PAFAH1B1 PE=1 SV=2	1	2	2	2	2	2	1	2	0	1	2	2	2	1	0	0	1	2	1	0	2	2	1	2	0	1	2	2	2	1	0	0	1	2	1	0	2	2	1	2	0	1
P43121	P43121	6	6	6	Cell surface glycoprotein MUC18	MCAM	sp|P43121|MUC18_HUMAN Cell surface glycoprotein MUC18 OS=Homo sapiens GN=MCAM PE=1 SV=2	1	6	6	6	3	4	3	4	2	2	4	3	4	5	1	2	4	4	1	2	3	4	3	4	2	2	4	3	4	5	1	2	4	4	1	2	3	4	3	4	2	2
P43243	P43243	10	10	10	Matrin-3	MATR3	sp|P43243|MATR3_HUMAN Matrin-3 OS=Homo sapiens GN=MATR3 PE=1 SV=2	1	10	10	10	7	6	5	6	4	3	7	9	6	7	5	5	4	4	4	0	7	6	5	6	4	3	7	9	6	7	5	5	4	4	4	0	7	6	5	6	4	3
P43246	P43246	7	7	7	DNA mismatch repair protein Msh2	MSH2	sp|P43246|MSH2_HUMAN DNA mismatch repair protein Msh2 OS=Homo sapiens GN=MSH2 PE=1 SV=1	1	7	7	7	3	4	1	1	2	1	2	5	1	2	1	1	1	2	1	0	3	4	1	1	2	1	2	5	1	2	1	1	1	2	1	0	3	4	1	1	2	1
P43250	P43250	3	3	3	G protein-coupled receptor kinase 6	GRK6	sp|P43250|GRK6_HUMAN G protein-coupled receptor kinase 6 OS=Homo sapiens GN=GRK6 PE=1 SV=2	1	3	3	3	0	0	1	1	0	0	1	1	0	1	0	0	1	0	1	0	0	0	1	1	0	0	1	1	0	1	0	0	1	0	1	0	0	0	1	1	0	0
P43304	P43304	6	6	6	Glycerol-3-phosphate dehydrogenase, mitochondrial	GPD2	sp|P43304|GPDM_HUMAN Glycerol-3-phosphate dehydrogenase, mitochondrial OS=Homo sapiens GN=GPD2 PE=1 SV=3	1	6	6	6	3	2	4	3	2	3	3	5	4	4	3	2	4	6	3	0	3	2	4	3	2	3	3	5	4	4	3	2	4	6	3	0	3	2	4	3	2	3
P43307	P43307	3	3	3	Translocon-associated protein subunit alpha	SSR1	sp|P43307|SSRA_HUMAN Translocon-associated protein subunit alpha OS=Homo sapiens GN=SSR1 PE=1 SV=3	1	3	3	3	3	1	3	2	3	3	2	2	3	2	2	3	3	3	2	1	3	1	3	2	3	3	2	2	3	2	2	3	3	3	2	1	3	1	3	2	3	3
P43308	P43308	2	2	2	Translocon-associated protein subunit beta	SSR2	sp|P43308|SSRB_HUMAN Translocon-associated protein subunit beta OS=Homo sapiens GN=SSR2 PE=1 SV=1	1	2	2	2	1	1	0	1	1	2	1	1	1	2	2	1	2	2	2	1	1	1	0	1	1	2	1	1	1	2	2	1	2	2	2	1	1	1	0	1	1	2
P43487	P43487	3	3	3	Ran-specific GTPase-activating protein	RANBP1	sp|P43487|RANG_HUMAN Ran-specific GTPase-activating protein OS=Homo sapiens GN=RANBP1 PE=1 SV=1	1	3	3	3	2	2	2	2	1	1	2	2	2	2	1	1	2	2	2	1	2	2	2	2	1	1	2	2	2	2	1	1	2	2	2	1	2	2	2	2	1	1
P43490	P43490	3	3	3	Nicotinamide phosphoribosyltransferase	NAMPT	sp|P43490|NAMPT_HUMAN Nicotinamide phosphoribosyltransferase OS=Homo sapiens GN=NAMPT PE=1 SV=1	1	3	3	3	2	2	2	1	1	1	2	2	2	3	0	1	2	1	2	0	2	2	2	1	1	1	2	2	2	3	0	1	2	1	2	0	2	2	2	1	1	1
P43686	P43686	8	8	8	26S protease regulatory subunit 6B	PSMC4	sp|P43686|PRS6B_HUMAN 26S protease regulatory subunit 6B OS=Homo sapiens GN=PSMC4 PE=1 SV=2	1	8	8	8	6	7	4	6	1	3	6	6	6	7	1	2	5	4	2	2	6	7	4	6	1	3	6	6	6	7	1	2	5	4	2	2	6	7	4	6	1	3
P43897	P43897	2	2	2	Elongation factor Ts, mitochondrial	TSFM	sp|P43897|EFTS_HUMAN Elongation factor Ts, mitochondrial OS=Homo sapiens GN=TSFM PE=1 SV=2	1	2	2	2	2	1	1	2	1	0	2	2	2	2	2	1	2	2	2	0	2	1	1	2	1	0	2	2	2	2	2	1	2	2	2	0	2	1	1	2	1	0
P45880	P45880	7	7	7	Voltage-dependent anion-selective channel protein 2	VDAC2	sp|P45880|VDAC2_HUMAN Voltage-dependent anion-selective channel protein 2 OS=Homo sapiens GN=VDAC2 PE=1 SV=2	1	7	7	7	5	5	5	6	4	5	4	4	4	3	4	6	5	4	4	3	5	5	5	6	4	5	4	4	4	3	4	6	5	4	4	3	5	5	5	6	4	5
P45954	P45954	1	1	1	Short/branched chain specific acyl-CoA dehydrogenase, mitochondrial	ACADSB	sp|P45954|ACDSB_HUMAN Short/branched chain specific acyl-CoA dehydrogenase, mitochondrial OS=Homo sapiens GN=ACADSB PE=1 SV=1	1	1	1	1	0	0	0	0	0	0	0	1	0	0	0	0	0	0	0	0	0	0	0	0	0	0	0	1	0	0	0	0	0	0	0	0	0	0	0	0	0	0
P45974	P45974	5	5	5	Ubiquitin carboxyl-terminal hydrolase 5	USP5	sp|P45974|UBP5_HUMAN Ubiquitin carboxyl-terminal hydrolase 5 OS=Homo sapiens GN=USP5 PE=1 SV=2	1	5	5	5	4	3	3	3	1	2	4	4	3	3	2	2	4	2	3	0	4	3	3	3	1	2	4	4	3	3	2	2	4	2	3	0	4	3	3	3	1	2
P45983	P45983	2	2	2	Mitogen-activated protein kinase 8	MAPK8	sp|P45983|MK08_HUMAN Mitogen-activated protein kinase 8 OS=Homo sapiens GN=MAPK8 PE=1 SV=2	1	2	2	2	0	0	0	1	0	0	0	1	1	1	0	0	0	0	0	0	0	0	0	1	0	0	0	1	1	1	0	0	0	0	0	0	0	0	0	1	0	0
P45984	P45984	1	1	1	Mitogen-activated protein kinase 9	MAPK9	sp|P45984|MK09_HUMAN Mitogen-activated protein kinase 9 OS=Homo sapiens GN=MAPK9 PE=1 SV=2	1	1	1	1	0	1	1	0	0	0	0	1	0	1	0	0	1	0	0	0	0	1	1	0	0	0	0	1	0	1	0	0	1	0	0	0	0	1	1	0	0	0
P46013	P46013	9	9	9	Antigen KI-67	MKI67	sp|P46013|KI67_HUMAN Antigen KI-67 OS=Homo sapiens GN=MKI67 PE=1 SV=2	1	9	9	9	3	4	4	4	0	1	5	2	4	3	2	2	5	2	1	0	3	4	4	4	0	1	5	2	4	3	2	2	5	2	1	0	3	4	4	4	0	1
P46019	P46019	1	1	1	Phosphorylase b kinase regulatory subunit alpha, liver isoform	PHKA2	sp|P46019|KPB2_HUMAN Phosphorylase b kinase regulatory subunit alpha, liver isoform OS=Homo sapiens GN=PHKA2 PE=1 SV=1	1	1	1	1	0	1	0	0	0	0	1	0	1	1	0	0	0	0	0	0	0	1	0	0	0	0	1	0	1	1	0	0	0	0	0	0	0	1	0	0	0	0
P46060	P46060	5	5	5	Ran GTPase-activating protein 1	RANGAP1	sp|P46060|RAGP1_HUMAN Ran GTPase-activating protein 1 OS=Homo sapiens GN=RANGAP1 PE=1 SV=1	1	5	5	5	3	3	3	3	2	1	3	4	2	3	1	3	3	3	0	0	3	3	3	3	2	1	3	4	2	3	1	3	3	3	0	0	3	3	3	3	2	1
P46063	P46063	6	6	6	ATP-dependent DNA helicase Q1	RECQL	sp|P46063|RECQ1_HUMAN ATP-dependent DNA helicase Q1 OS=Homo sapiens GN=RECQL PE=1 SV=3	1	6	6	6	3	3	2	2	2	2	5	4	4	3	1	1	4	4	3	1	3	3	2	2	2	2	5	4	4	3	1	1	4	4	3	1	3	3	2	2	2	2
P46087	P46087	4	4	4	Probable 28S rRNA (cytosine(4447)-C(5))-methyltransferase	NOP2	sp|P46087|NOP2_HUMAN Probable 28S rRNA (cytosine(4447)-C(5))-methyltransferase OS=Homo sapiens GN=NOP2 PE=1 SV=2	1	4	4	4	2	2	0	1	4	3	1	3	0	1	3	4	2	2	1	1	2	2	0	1	4	3	1	3	0	1	3	4	2	2	1	1	2	2	0	1	4	3
P46108	P46108	1	1	1	Adapter molecule crk	CRK	sp|P46108|CRK_HUMAN Adapter molecule crk OS=Homo sapiens GN=CRK PE=1 SV=2	1	1	1	1	0	0	0	0	0	0	0	0	0	0	0	0	0	1	1	0	0	0	0	0	0	0	0	0	0	0	0	0	0	1	1	0	0	0	0	0	0	0
P46109	P46109	2	2	2	Crk-like protein	CRKL	sp|P46109|CRKL_HUMAN Crk-like protein OS=Homo sapiens GN=CRKL PE=1 SV=1	1	2	2	2	2	2	1	1	1	2	2	2	1	1	0	0	1	1	0	0	2	2	1	1	1	2	2	2	1	1	0	0	1	1	0	0	2	2	1	1	1	2
P46379	P46379	7	7	7	Large proline-rich protein BAG6	BAG6	sp|P46379|BAG6_HUMAN Large proline-rich protein BAG6 OS=Homo sapiens GN=BAG6 PE=1 SV=2	1	7	7	7	3	5	4	2	2	2	4	3	4	2	3	2	3	1	2	0	3	5	4	2	2	2	4	3	4	2	3	2	3	1	2	0	3	5	4	2	2	2
P46459	P46459	4	4	4	Vesicle-fusing ATPase	NSF	sp|P46459|NSF_HUMAN Vesicle-fusing ATPase OS=Homo sapiens GN=NSF PE=1 SV=3	1	4	4	4	3	1	0	1	0	0	2	2	1	2	0	0	1	0	0	0	3	1	0	1	0	0	2	2	1	2	0	0	1	0	0	0	3	1	0	1	0	0
P46531	P46531	2	2	2	Neurogenic locus notch homolog protein 1;Notch 1 extracellular truncation;Notch 1 intracellular domain	NOTCH1	sp|P46531|NOTC1_HUMAN Neurogenic locus notch homolog protein 1 OS=Homo sapiens GN=NOTCH1 PE=1 SV=4	1	2	2	2	0	0	1	0	0	0	1	0	2	1	0	0	0	0	1	0	0	0	1	0	0	0	1	0	2	1	0	0	0	0	1	0	0	0	1	0	0	0
P46734;P52564	P46734;P52564	2;1	2;1	2;1	Dual specificity mitogen-activated protein kinase kinase 3;Dual specificity mitogen-activated protein kinase kinase 6	MAP2K3;MAP2K6	sp|P46734|MP2K3_HUMAN Dual specificity mitogen-activated protein kinase kinase 3 OS=Homo sapiens GN=MAP2K3 PE=1 SV=2;sp|P52564|MP2K6_HUMAN Dual specificity mitogen-activated protein kinase kinase 6 OS=Homo sapiens GN=MAP2K6 PE=1 SV=1	2	2	2	2	1	0	0	0	0	0	1	1	1	1	0	0	0	0	0	0	1	0	0	0	0	0	1	1	1	1	0	0	0	0	0	0	1	0	0	0	0	0
P46736	P46736	2	2	2	Lys-63-specific deubiquitinase BRCC36	BRCC3	sp|P46736|BRCC3_HUMAN Lys-63-specific deubiquitinase BRCC36 OS=Homo sapiens GN=BRCC3 PE=1 SV=2	1	2	2	2	0	0	1	0	0	0	0	0	1	1	0	0	0	1	0	0	0	0	1	0	0	0	0	0	1	1	0	0	0	1	0	0	0	0	1	0	0	0
P46776	P46776	1	1	1	60S ribosomal protein L27a	RPL27A	sp|P46776|RL27A_HUMAN 60S ribosomal protein L27a OS=Homo sapiens GN=RPL27A PE=1 SV=2	1	1	1	1	0	0	0	0	0	0	0	0	0	0	1	0	0	0	0	0	0	0	0	0	0	0	0	0	0	0	1	0	0	0	0	0	0	0	0	0	0	0
P46777	P46777	2	2	2	60S ribosomal protein L5	RPL5	sp|P46777|RL5_HUMAN 60S ribosomal protein L5 OS=Homo sapiens GN=RPL5 PE=1 SV=3	1	2	2	2	1	1	1	1	1	0	2	1	1	1	1	1	2	1	1	0	1	1	1	1	1	0	2	1	1	1	1	1	2	1	1	0	1	1	1	1	1	0
P46782	P46782	5	5	5	40S ribosomal protein S5;40S ribosomal protein S5, N-terminally processed	RPS5	sp|P46782|RS5_HUMAN 40S ribosomal protein S5 OS=Homo sapiens GN=RPS5 PE=1 SV=4	1	5	5	5	3	3	0	1	2	2	2	3	2	2	4	2	1	3	1	2	3	3	0	1	2	2	2	3	2	2	4	2	1	3	1	2	3	3	0	1	2	2
P46783;Q9NQ39	P46783;Q9NQ39	1;1	1;1	1;1	40S ribosomal protein S10;Putative 40S ribosomal protein S10-like	RPS10;RPS10P5	sp|P46783|RS10_HUMAN 40S ribosomal protein S10 OS=Homo sapiens GN=RPS10 PE=1 SV=1;sp|Q9NQ39|RS10L_HUMAN Putative 40S ribosomal protein S10-like OS=Homo sapiens GN=RPS10P5 PE=5 SV=1	2	1	1	1	1	1	1	1	0	1	0	0	0	1	1	0	0	0	0	0	1	1	1	1	0	1	0	0	0	1	1	0	0	0	0	0	1	1	1	1	0	1
P46821	P46821	33	33	33	Microtubule-associated protein 1B;MAP1B heavy chain;MAP1 light chain LC1	MAP1B	sp|P46821|MAP1B_HUMAN Microtubule-associated protein 1B OS=Homo sapiens GN=MAP1B PE=1 SV=2	1	33	33	33	23	24	20	21	17	20	20	21	24	22	15	16	21	14	20	3	23	24	20	21	17	20	20	21	24	22	15	16	21	14	20	3	23	24	20	21	17	20
P46926	P46926	2	2	2	Glucosamine-6-phosphate isomerase 1	GNPDA1	sp|P46926|GNPI1_HUMAN Glucosamine-6-phosphate isomerase 1 OS=Homo sapiens GN=GNPDA1 PE=1 SV=1	1	2	2	2	0	0	1	0	0	0	1	1	1	1	0	0	1	1	1	0	0	0	1	0	0	0	1	1	1	1	0	0	1	1	1	0	0	0	1	0	0	0
P46934	P46934	4	4	4	E3 ubiquitin-protein ligase NEDD4	NEDD4	sp|P46934|NEDD4_HUMAN E3 ubiquitin-protein ligase NEDD4 OS=Homo sapiens GN=NEDD4 PE=1 SV=4	1	4	4	4	2	1	3	3	2	0	3	2	2	3	1	1	0	1	0	0	2	1	3	3	2	0	3	2	2	3	1	1	0	1	0	0	2	1	3	3	2	0
P46937	P46937	6	6	6	Transcriptional coactivator YAP1	YAP1	sp|P46937|YAP1_HUMAN Transcriptional coactivator YAP1 OS=Homo sapiens GN=YAP1 PE=1 SV=2	1	6	6	6	2	2	2	3	2	2	3	4	5	1	2	1	2	3	1	0	2	2	2	3	2	2	3	4	5	1	2	1	2	3	1	0	2	2	2	3	2	2
P46939	P46939	23	23	23	Utrophin	UTRN	sp|P46939|UTRO_HUMAN Utrophin OS=Homo sapiens GN=UTRN PE=1 SV=2	1	23	23	23	5	9	6	9	2	4	15	11	11	10	3	5	7	13	5	1	5	9	6	9	2	4	15	11	11	10	3	5	7	13	5	1	5	9	6	9	2	4
P46940	P46940	22	22	22	Ras GTPase-activating-like protein IQGAP1	IQGAP1	sp|P46940|IQGA1_HUMAN Ras GTPase-activating-like protein IQGAP1 OS=Homo sapiens GN=IQGAP1 PE=1 SV=1	1	22	22	22	17	17	14	13	9	11	16	19	17	13	8	9	13	13	10	4	17	17	14	13	9	11	16	19	17	13	8	9	13	13	10	4	17	17	14	13	9	11
P46976	P46976	2	2	2	Glycogenin-1	GYG1	sp|P46976|GLYG_HUMAN Glycogenin-1 OS=Homo sapiens GN=GYG1 PE=1 SV=4	1	2	2	2	1	1	0	0	1	0	0	0	1	2	0	0	1	1	0	0	1	1	0	0	1	0	0	0	1	2	0	0	1	1	0	0	1	1	0	0	1	0
P47224	P47224	1	1	1	Guanine nucleotide exchange factor MSS4	RABIF	sp|P47224|MSS4_HUMAN Guanine nucleotide exchange factor MSS4 OS=Homo sapiens GN=RABIF PE=1 SV=2	1	1	1	1	0	0	0	0	0	0	1	0	1	1	0	0	0	0	0	0	0	0	0	0	0	0	1	0	1	1	0	0	0	0	0	0	0	0	0	0	0	0
P47755	P47755	3	3	3	F-actin-capping protein subunit alpha-2	CAPZA2	sp|P47755|CAZA2_HUMAN F-actin-capping protein subunit alpha-2 OS=Homo sapiens GN=CAPZA2 PE=1 SV=3	1	3	3	3	1	1	0	0	1	1	2	1	1	2	1	1	0	1	0	0	1	1	0	0	1	1	2	1	1	2	1	1	0	1	0	0	1	1	0	0	1	1
P47756	P47756	3	3	3	F-actin-capping protein subunit beta	CAPZB	sp|P47756|CAPZB_HUMAN F-actin-capping protein subunit beta OS=Homo sapiens GN=CAPZB PE=1 SV=4	1	3	3	3	1	1	2	2	0	1	1	2	1	1	1	0	1	2	1	1	1	1	2	2	0	1	1	2	1	1	1	0	1	2	1	1	1	1	2	2	0	1
P47897	P47897	7	7	7	Glutamine--tRNA ligase	QARS	sp|P47897|SYQ_HUMAN Glutamine--tRNA ligase OS=Homo sapiens GN=QARS PE=1 SV=1	1	7	7	7	4	3	3	3	0	1	2	4	4	4	2	1	3	5	3	1	4	3	3	3	0	1	2	4	4	4	2	1	3	5	3	1	4	3	3	3	0	1
P47914	P47914	1	1	1	60S ribosomal protein L29	RPL29	sp|P47914|RL29_HUMAN 60S ribosomal protein L29 OS=Homo sapiens GN=RPL29 PE=1 SV=2	1	1	1	1	1	1	1	1	0	0	0	0	1	0	0	0	0	0	0	0	1	1	1	1	0	0	0	0	1	0	0	0	0	0	0	0	1	1	1	1	0	0
P47985;P0C7P4	P47985;P0C7P4	2;1	2;1	2;1	Cytochrome b-c1 complex subunit Rieske, mitochondrial;Cytochrome b-c1 complex subunit 11;Putative cytochrome b-c1 complex subunit Rieske-like protein 1	UQCRFS1;UQCRFS1P1	sp|P47985|UCRI_HUMAN Cytochrome b-c1 complex subunit Rieske, mitochondrial OS=Homo sapiens GN=UQCRFS1 PE=1 SV=2;sp|P0C7P4|UCRIL_HUMAN Putative cytochrome b-c1 complex subunit Rieske-like protein 1 OS=Homo sapiens GN=UQCRFS1P1 PE=5 SV=1	2	2	2	2	1	1	1	1	1	1	1	1	1	1	1	1	1	2	1	0	1	1	1	1	1	1	1	1	1	1	1	1	1	2	1	0	1	1	1	1	1	1
P48047	P48047	1	1	1	ATP synthase subunit O, mitochondrial	ATP5O	sp|P48047|ATPO_HUMAN ATP synthase subunit O, mitochondrial OS=Homo sapiens GN=ATP5O PE=1 SV=1	1	1	1	1	1	1	1	1	1	1	1	1	1	1	1	1	1	1	1	1	1	1	1	1	1	1	1	1	1	1	1	1	1	1	1	1	1	1	1	1	1	1
P48059	P48059	5	5	5	LIM and senescent cell antigen-like-containing domain protein 1	LIMS1	sp|P48059|LIMS1_HUMAN LIM and senescent cell antigen-like-containing domain protein 1 OS=Homo sapiens GN=LIMS1 PE=1 SV=4	1	5	5	5	2	1	0	1	0	0	3	2	0	2	0	0	2	0	0	0	2	1	0	1	0	0	3	2	0	2	0	0	2	0	0	0	2	1	0	1	0	0
P48060	P48060	2	2	2	Glioma pathogenesis-related protein 1	GLIPR1	sp|P48060|GLIP1_HUMAN Glioma pathogenesis-related protein 1 OS=Homo sapiens GN=GLIPR1 PE=1 SV=3	1	2	2	2	1	1	0	0	1	0	1	1	1	1	1	1	1	1	0	0	1	1	0	0	1	0	1	1	1	1	1	1	1	1	0	0	1	1	0	0	1	0
P48147	P48147	7	7	7	Prolyl endopeptidase	PREP	sp|P48147|PPCE_HUMAN Prolyl endopeptidase OS=Homo sapiens GN=PREP PE=1 SV=2	1	7	7	7	4	2	2	3	2	1	2	4	4	3	1	2	1	1	0	0	4	2	2	3	2	1	2	4	4	3	1	2	1	1	0	0	4	2	2	3	2	1
P48163	P48163	6	6	6	NADP-dependent malic enzyme	ME1	sp|P48163|MAOX_HUMAN NADP-dependent malic enzyme OS=Homo sapiens GN=ME1 PE=1 SV=1	1	6	6	6	3	1	2	2	1	1	3	3	2	3	0	2	1	0	2	0	3	1	2	2	1	1	3	3	2	3	0	2	1	0	2	0	3	1	2	2	1	1
P48382	P48382	1	1	1	DNA-binding protein RFX5	RFX5	sp|P48382|RFX5_HUMAN DNA-binding protein RFX5 OS=Homo sapiens GN=RFX5 PE=1 SV=1	1	1	1	1	0	0	1	1	0	0	0	0	1	1	0	0	1	0	0	0	0	0	1	1	0	0	0	0	1	1	0	0	1	0	0	0	0	0	1	1	0	0
P48444	P48444	1	1	1	Coatomer subunit delta	ARCN1	sp|P48444|COPD_HUMAN Coatomer subunit delta OS=Homo sapiens GN=ARCN1 PE=1 SV=1	1	1	1	1	1	1	1	1	0	0	0	0	1	1	0	0	1	1	0	0	1	1	1	1	0	0	0	0	1	1	0	0	1	1	0	0	1	1	1	1	0	0
P48449	P48449	3	3	3	Lanosterol synthase	LSS	sp|P48449|ERG7_HUMAN Lanosterol synthase OS=Homo sapiens GN=LSS PE=1 SV=1	1	3	3	3	1	1	2	2	1	1	1	1	2	2	1	1	0	1	2	0	1	1	2	2	1	1	1	1	2	2	1	1	0	1	2	0	1	1	2	2	1	1
P48506	P48506	1	1	1	Glutamate--cysteine ligase catalytic subunit	GCLC	sp|P48506|GSH1_HUMAN Glutamate--cysteine ligase catalytic subunit OS=Homo sapiens GN=GCLC PE=1 SV=2	1	1	1	1	0	1	0	1	0	1	1	0	0	0	1	0	0	0	0	0	0	1	0	1	0	1	1	0	0	0	1	0	0	0	0	0	0	1	0	1	0	1
P48507	P48507	2	2	2	Glutamate--cysteine ligase regulatory subunit	GCLM	sp|P48507|GSH0_HUMAN Glutamate--cysteine ligase regulatory subunit OS=Homo sapiens GN=GCLM PE=1 SV=1	1	2	2	2	1	1	0	0	0	0	0	1	0	0	0	0	1	1	0	1	1	1	0	0	0	0	0	1	0	0	0	0	1	1	0	1	1	1	0	0	0	0
P48556	P48556	5	5	5	26S proteasome non-ATPase regulatory subunit 8	PSMD8	sp|P48556|PSMD8_HUMAN 26S proteasome non-ATPase regulatory subunit 8 OS=Homo sapiens GN=PSMD8 PE=1 SV=2	1	5	5	5	0	1	0	1	0	0	1	1	1	1	1	2	1	2	1	1	0	1	0	1	0	0	1	1	1	1	1	2	1	2	1	1	0	1	0	1	0	0
P48634	P48634	6	6	6	Protein PRRC2A	PRRC2A	sp|P48634|PRC2A_HUMAN Protein PRRC2A OS=Homo sapiens GN=PRRC2A PE=1 SV=3	1	6	6	6	0	0	0	2	2	2	1	1	2	3	2	2	2	0	3	1	0	0	0	2	2	2	1	1	2	3	2	2	2	0	3	1	0	0	0	2	2	2
P48637	P48637	2	2	2	Glutathione synthetase	GSS	sp|P48637|GSHB_HUMAN Glutathione synthetase OS=Homo sapiens GN=GSS PE=1 SV=1	1	2	2	2	2	1	0	0	0	0	0	2	0	0	0	0	0	0	0	0	2	1	0	0	0	0	0	2	0	0	0	0	0	0	0	0	2	1	0	0	0	0
P48643	P48643	5	5	5	T-complex protein 1 subunit epsilon	CCT5	sp|P48643|TCPE_HUMAN T-complex protein 1 subunit epsilon OS=Homo sapiens GN=CCT5 PE=1 SV=1	1	5	5	5	3	4	4	4	2	2	4	5	4	4	4	2	4	3	3	3	3	4	4	4	2	2	4	5	4	4	4	2	4	3	3	3	3	4	4	4	2	2
P48651	P48651	2	2	2	Phosphatidylserine synthase 1	PTDSS1	sp|P48651|PTSS1_HUMAN Phosphatidylserine synthase 1 OS=Homo sapiens GN=PTDSS1 PE=1 SV=1	1	2	2	2	1	1	1	0	0	0	1	1	1	1	0	0	1	1	1	0	1	1	1	0	0	0	1	1	1	1	0	0	1	1	1	0	1	1	1	0	0	0
P48723	P48723	3	3	3	Heat shock 70 kDa protein 13	HSPA13	sp|P48723|HSP13_HUMAN Heat shock 70 kDa protein 13 OS=Homo sapiens GN=HSPA13 PE=1 SV=1	1	3	3	3	0	1	3	2	0	0	3	3	0	1	0	0	0	0	0	0	0	1	3	2	0	0	3	3	0	1	0	0	0	0	0	0	0	1	3	2	0	0
P48729	P48729	2	2	2	Casein kinase I isoform alpha	CSNK1A1	sp|P48729|KC1A_HUMAN Casein kinase I isoform alpha OS=Homo sapiens GN=CSNK1A1 PE=1 SV=2	1	2	2	2	0	0	0	1	0	1	0	0	1	1	1	0	2	0	0	1	0	0	0	1	0	1	0	0	1	1	1	0	2	0	0	1	0	0	0	1	0	1
P48730	P48730	1	1	1	Casein kinase I isoform delta	CSNK1D	sp|P48730|KC1D_HUMAN Casein kinase I isoform delta OS=Homo sapiens GN=CSNK1D PE=1 SV=2	1	1	1	1	1	0	0	1	0	0	1	0	0	1	0	0	1	0	0	0	1	0	0	1	0	0	1	0	0	1	0	0	1	0	0	0	1	0	0	1	0	0
P48735	P48735	1	1	1	Isocitrate dehydrogenase [NADP], mitochondrial	IDH2	sp|P48735|IDHP_HUMAN Isocitrate dehydrogenase [NADP], mitochondrial OS=Homo sapiens GN=IDH2 PE=1 SV=2	1	1	1	1	0	0	1	0	0	0	1	1	0	0	0	0	0	0	0	0	0	0	1	0	0	0	1	1	0	0	0	0	0	0	0	0	0	0	1	0	0	0
P48745	P48745	1	1	1	Protein NOV homolog	NOV	sp|P48745|NOV_HUMAN Protein NOV homolog OS=Homo sapiens GN=NOV PE=1 SV=1	1	1	1	1	0	0	0	1	0	0	1	0	1	1	1	0	1	0	1	0	0	0	0	1	0	0	1	0	1	1	1	0	1	0	1	0	0	0	0	1	0	0
P48960;Q9UHX3	P48960	5;2	5;2	5;2	CD97 antigen;CD97 antigen subunit alpha;CD97 antigen subunit beta	CD97	sp|P48960|CD97_HUMAN CD97 antigen OS=Homo sapiens GN=CD97 PE=1 SV=4	2	5	5	5	3	4	4	3	2	2	2	2	2	2	2	4	2	2	1	1	3	4	4	3	2	2	2	2	2	2	2	4	2	2	1	1	3	4	4	3	2	2
P49005	P49005	2	2	2	DNA polymerase delta subunit 2	POLD2	sp|P49005|DPOD2_HUMAN DNA polymerase delta subunit 2 OS=Homo sapiens GN=POLD2 PE=1 SV=1	1	2	2	2	2	1	2	1	0	0	1	2	2	2	0	1	1	1	0	0	2	1	2	1	0	0	1	2	2	2	0	1	1	1	0	0	2	1	2	1	0	0
P49006	P49006	4	4	4	MARCKS-related protein	MARCKSL1	sp|P49006|MRP_HUMAN MARCKS-related protein OS=Homo sapiens GN=MARCKSL1 PE=1 SV=2	1	4	4	4	3	2	3	2	2	2	2	0	2	2	2	2	4	0	1	0	3	2	3	2	2	2	2	0	2	2	2	2	4	0	1	0	3	2	3	2	2	2
P49023	P49023	3	3	3	Paxillin	PXN	sp|P49023|PAXI_HUMAN Paxillin OS=Homo sapiens GN=PXN PE=1 SV=3	1	3	3	3	3	2	3	2	1	1	2	2	2	3	1	1	2	0	2	0	3	2	3	2	1	1	2	2	2	3	1	1	2	0	2	0	3	2	3	2	1	1
P49069	P49069	3	3	3	Calcium signal-modulating cyclophilin ligand	CAMLG	sp|P49069|CAMLG_HUMAN Calcium signal-modulating cyclophilin ligand OS=Homo sapiens GN=CAMLG PE=1 SV=1	1	3	3	3	1	2	2	2	0	1	1	0	1	1	0	1	2	0	0	0	1	2	2	2	0	1	1	0	1	1	0	1	2	0	0	0	1	2	2	2	0	1
P49116	P49116	2	2	2	Nuclear receptor subfamily 2 group C member 2	NR2C2	sp|P49116|NR2C2_HUMAN Nuclear receptor subfamily 2 group C member 2 OS=Homo sapiens GN=NR2C2 PE=1 SV=1	1	2	2	2	0	0	0	0	0	0	1	0	1	0	0	0	1	0	0	0	0	0	0	0	0	0	1	0	1	0	0	0	1	0	0	0	0	0	0	0	0	0
P49137	P49137	1	1	1	MAP kinase-activated protein kinase 2	MAPKAPK2	sp|P49137|MAPK2_HUMAN MAP kinase-activated protein kinase 2 OS=Homo sapiens GN=MAPKAPK2 PE=1 SV=1	1	1	1	1	0	0	0	0	0	0	1	0	1	0	1	0	0	0	0	0	0	0	0	0	0	0	1	0	1	0	1	0	0	0	0	0	0	0	0	0	0	0
P49189	P49189	4	4	4	4-trimethylaminobutyraldehyde dehydrogenase	ALDH9A1	sp|P49189|AL9A1_HUMAN 4-trimethylaminobutyraldehyde dehydrogenase OS=Homo sapiens GN=ALDH9A1 PE=1 SV=3	1	4	4	4	3	3	2	2	0	0	3	2	2	2	0	0	1	1	0	0	3	3	2	2	0	0	3	2	2	2	0	0	1	1	0	0	3	3	2	2	0	0
P49257	P49257	9	9	9	Protein ERGIC-53	LMAN1	sp|P49257|LMAN1_HUMAN Protein ERGIC-53 OS=Homo sapiens GN=LMAN1 PE=1 SV=2	1	9	9	9	3	6	5	6	2	1	5	7	5	4	0	1	2	6	4	2	3	6	5	6	2	1	5	7	5	4	0	1	2	6	4	2	3	6	5	6	2	1
P49321	P49321	12	12	12	Nuclear autoantigenic sperm protein	NASP	sp|P49321|NASP_HUMAN Nuclear autoantigenic sperm protein OS=Homo sapiens GN=NASP PE=1 SV=2	1	12	12	12	9	7	7	7	3	5	6	5	8	9	3	4	6	5	3	0	9	7	7	7	3	5	6	5	8	9	3	4	6	5	3	0	9	7	7	7	3	5
P49327	P49327	32	32	32	Fatty acid synthase;[Acyl-carrier-protein] S-acetyltransferase;[Acyl-carrier-protein] S-malonyltransferase;3-oxoacyl-[acyl-carrier-protein] synthase;3-oxoacyl-[acyl-carrier-protein] reductase;3-hydroxyacyl-[acyl-carrier-protein] dehydratase;Enoyl-[acyl-carrier-protein] reductase;Oleoyl-[acyl-carrier-protein] hydrolase	FASN	sp|P49327|FAS_HUMAN Fatty acid synthase OS=Homo sapiens GN=FASN PE=1 SV=3	1	32	32	32	14	17	16	14	9	8	24	26	16	16	9	9	14	20	9	6	14	17	16	14	9	8	24	26	16	16	9	9	14	20	9	6	14	17	16	14	9	8
P49354	P49354	4	4	4	Protein farnesyltransferase/geranylgeranyltransferase type-1 subunit alpha	FNTA	sp|P49354|FNTA_HUMAN Protein farnesyltransferase/geranylgeranyltransferase type-1 subunit alpha OS=Homo sapiens GN=FNTA PE=1 SV=1	1	4	4	4	1	1	0	1	1	1	2	2	1	2	0	0	1	1	1	0	1	1	0	1	1	1	2	2	1	2	0	0	1	1	1	0	1	1	0	1	1	1
P49356	P49356	1	1	1	Protein farnesyltransferase subunit beta	FNTB	sp|P49356|FNTB_HUMAN Protein farnesyltransferase subunit beta OS=Homo sapiens GN=FNTB PE=1 SV=1	1	1	1	1	0	0	0	0	0	0	0	0	1	1	0	0	0	0	0	0	0	0	0	0	0	0	0	0	1	1	0	0	0	0	0	0	0	0	0	0	0	0
P49368	P49368	6	6	6	T-complex protein 1 subunit gamma	CCT3	sp|P49368|TCPG_HUMAN T-complex protein 1 subunit gamma OS=Homo sapiens GN=CCT3 PE=1 SV=4	1	6	6	6	4	4	3	3	3	2	4	4	4	5	1	2	2	4	2	1	4	4	3	3	3	2	4	4	4	5	1	2	2	4	2	1	4	4	3	3	3	2
P49411	P49411	4	4	4	Elongation factor Tu, mitochondrial	TUFM	sp|P49411|EFTU_HUMAN Elongation factor Tu, mitochondrial OS=Homo sapiens GN=TUFM PE=1 SV=2	1	4	4	4	2	2	2	2	0	1	4	4	2	2	0	0	2	3	0	0	2	2	2	2	0	1	4	4	2	2	0	0	2	3	0	0	2	2	2	2	0	1
P49419	P49419	3	3	3	Alpha-aminoadipic semialdehyde dehydrogenase	ALDH7A1	sp|P49419|AL7A1_HUMAN Alpha-aminoadipic semialdehyde dehydrogenase OS=Homo sapiens GN=ALDH7A1 PE=1 SV=5	1	3	3	3	1	3	1	0	1	1	2	3	3	2	0	1	1	1	1	0	1	3	1	0	1	1	2	3	3	2	0	1	1	1	1	0	1	3	1	0	1	1
P49427	P49427	1	1	1	Ubiquitin-conjugating enzyme E2 R1	CDC34	sp|P49427|UB2R1_HUMAN Ubiquitin-conjugating enzyme E2 R1 OS=Homo sapiens GN=CDC34 PE=1 SV=2	1	1	1	1	0	0	0	0	0	0	0	0	0	1	0	0	0	0	0	0	0	0	0	0	0	0	0	0	0	1	0	0	0	0	0	0	0	0	0	0	0	0
P49441	P49441	2	2	2	Inositol polyphosphate 1-phosphatase	INPP1	sp|P49441|INPP_HUMAN Inositol polyphosphate 1-phosphatase OS=Homo sapiens GN=INPP1 PE=1 SV=1	1	2	2	2	1	2	0	0	0	0	1	1	2	2	0	0	1	0	1	0	1	2	0	0	0	0	1	1	2	2	0	0	1	0	1	0	1	2	0	0	0	0
P49454	P49454	5	5	5	Centromere protein F	CENPF	sp|P49454|CENPF_HUMAN Centromere protein F OS=Homo sapiens GN=CENPF PE=1 SV=2	1	5	5	5	1	2	0	1	0	0	2	1	1	2	0	0	1	0	1	0	1	2	0	1	0	0	2	1	1	2	0	0	1	0	1	0	1	2	0	1	0	0
P49458	P49458	1	1	1	Signal recognition particle 9 kDa protein	SRP9	sp|P49458|SRP09_HUMAN Signal recognition particle 9 kDa protein OS=Homo sapiens GN=SRP9 PE=1 SV=2	1	1	1	1	0	0	0	0	0	0	1	0	1	1	0	0	0	0	1	0	0	0	0	0	0	0	1	0	1	1	0	0	0	0	1	0	0	0	0	0	0	0
P49459;P63146	P49459;P63146	2;1	2;1	2;1	Ubiquitin-conjugating enzyme E2 A;Ubiquitin-conjugating enzyme E2 B	UBE2A;UBE2B	sp|P49459|UBE2A_HUMAN Ubiquitin-conjugating enzyme E2 A OS=Homo sapiens GN=UBE2A PE=1 SV=2;sp|P63146|UBE2B_HUMAN Ubiquitin-conjugating enzyme E2 B OS=Homo sapiens GN=UBE2B PE=1 SV=1	2	2	2	2	0	1	2	1	1	1	1	1	1	2	1	1	2	1	0	0	0	1	2	1	1	1	1	1	1	2	1	1	2	1	0	0	0	1	2	1	1	1
P49588	P49588	17	17	17	Alanine--tRNA ligase, cytoplasmic	AARS	sp|P49588|SYAC_HUMAN Alanine--tRNA ligase, cytoplasmic OS=Homo sapiens GN=AARS PE=1 SV=2	1	17	17	17	11	8	7	7	6	4	10	13	11	11	3	5	10	11	8	1	11	8	7	7	6	4	10	13	11	11	3	5	10	11	8	1	11	8	7	7	6	4
P49589	P49589	3	3	3	Cysteine--tRNA ligase, cytoplasmic	CARS	sp|P49589|SYCC_HUMAN Cysteine--tRNA ligase, cytoplasmic OS=Homo sapiens GN=CARS PE=1 SV=3	1	3	3	3	2	2	2	1	2	2	3	2	3	3	2	2	2	1	2	0	2	2	2	1	2	2	3	2	3	3	2	2	2	1	2	0	2	2	2	1	2	2
P49590	P49590	3	3	3	Probable histidine--tRNA ligase, mitochondrial	HARS2	sp|P49590|SYHM_HUMAN Probable histidine--tRNA ligase, mitochondrial OS=Homo sapiens GN=HARS2 PE=1 SV=1	1	3	3	3	1	3	2	2	0	1	2	1	2	1	1	2	2	1	1	0	1	3	2	2	0	1	2	1	2	1	1	2	2	1	1	0	1	3	2	2	0	1
P49591	P49591	4	4	4	Serine--tRNA ligase, cytoplasmic	SARS	sp|P49591|SYSC_HUMAN Serine--tRNA ligase, cytoplasmic OS=Homo sapiens GN=SARS PE=1 SV=3	1	4	4	4	3	3	4	3	2	3	4	3	4	4	1	2	2	3	1	2	3	3	4	3	2	3	4	3	4	4	1	2	2	3	1	2	3	3	4	3	2	3
P49593	P49593	3	3	3	Protein phosphatase 1F	PPM1F	sp|P49593|PPM1F_HUMAN Protein phosphatase 1F OS=Homo sapiens GN=PPM1F PE=1 SV=3	1	3	3	3	1	0	1	1	0	0	2	0	3	1	0	0	1	0	0	0	1	0	1	1	0	0	2	0	3	1	0	0	1	0	0	0	1	0	1	1	0	0
P49642	P49642	2	2	2	DNA primase small subunit	PRIM1	sp|P49642|PRI1_HUMAN DNA primase small subunit OS=Homo sapiens GN=PRIM1 PE=1 SV=1	1	2	2	2	2	2	1	2	1	2	2	1	2	2	0	0	1	1	0	0	2	2	1	2	1	2	2	1	2	2	0	0	1	1	0	0	2	2	1	2	1	2
P49643	P49643	3	3	3	DNA primase large subunit	PRIM2	sp|P49643|PRI2_HUMAN DNA primase large subunit OS=Homo sapiens GN=PRIM2 PE=1 SV=2	1	3	3	3	1	2	0	0	0	0	1	2	1	0	0	0	0	0	0	0	1	2	0	0	0	0	1	2	1	0	0	0	0	0	0	0	1	2	0	0	0	0
P49662	P49662	5	5	5	Caspase-4;Caspase-4 subunit 1;Caspase-4 subunit 2	CASP4	sp|P49662|CASP4_HUMAN Caspase-4 OS=Homo sapiens GN=CASP4 PE=1 SV=1	1	5	5	5	1	1	0	2	1	1	2	4	2	1	1	1	2	0	1	1	1	1	0	2	1	1	2	4	2	1	1	1	2	0	1	1	1	1	0	2	1	1
P49711	P49711	3	3	3	Transcriptional repressor CTCF	CTCF	sp|P49711|CTCF_HUMAN Transcriptional repressor CTCF OS=Homo sapiens GN=CTCF PE=1 SV=1	1	3	3	3	3	2	2	1	2	1	1	3	1	1	1	1	1	1	1	0	3	2	2	1	2	1	1	3	1	1	1	1	1	1	1	0	3	2	2	1	2	1
P49721	P49721	3	3	3	Proteasome subunit beta type-2	PSMB2	sp|P49721|PSB2_HUMAN Proteasome subunit beta type-2 OS=Homo sapiens GN=PSMB2 PE=1 SV=1	1	3	3	3	2	2	2	2	1	2	2	2	1	1	1	2	2	1	0	1	2	2	2	2	1	2	2	2	1	1	1	2	2	1	0	1	2	2	2	2	1	2
P49736	P49736	8	8	8	DNA replication licensing factor MCM2	MCM2	sp|P49736|MCM2_HUMAN DNA replication licensing factor MCM2 OS=Homo sapiens GN=MCM2 PE=1 SV=4	1	8	8	8	4	5	4	3	4	3	4	3	3	3	4	3	5	2	3	1	4	5	4	3	4	3	4	3	3	3	4	3	5	2	3	1	4	5	4	3	4	3
P49748	P49748	4	4	4	Very long-chain specific acyl-CoA dehydrogenase, mitochondrial	ACADVL	sp|P49748|ACADV_HUMAN Very long-chain specific acyl-CoA dehydrogenase, mitochondrial OS=Homo sapiens GN=ACADVL PE=1 SV=1	1	4	4	4	2	3	4	4	2	3	3	3	4	3	2	3	2	2	2	0	2	3	4	4	2	3	3	3	4	3	2	3	2	2	2	0	2	3	4	4	2	3
P49750	P49750	9	9	9	YLP motif-containing protein 1	YLPM1	sp|P49750|YLPM1_HUMAN YLP motif-containing protein 1 OS=Homo sapiens GN=YLPM1 PE=1 SV=3	1	9	9	9	5	5	3	4	3	3	4	3	5	4	2	3	4	2	2	0	5	5	3	4	3	3	4	3	5	4	2	3	4	2	2	0	5	5	3	4	3	3
Q8N9L9;Q86TX2;P49753	Q8N9L9;Q86TX2;P49753	1;1;1	1;1;1	1;1;1	Acyl-coenzyme A thioesterase 4;Acyl-coenzyme A thioesterase 1;Acyl-coenzyme A thioesterase 2, mitochondrial	ACOT4;ACOT1;ACOT2	sp|Q8N9L9|ACOT4_HUMAN Acyl-coenzyme A thioesterase 4 OS=Homo sapiens GN=ACOT4 PE=1 SV=2;sp|Q86TX2|ACOT1_HUMAN Acyl-coenzyme A thioesterase 1 OS=Homo sapiens GN=ACOT1 PE=1 SV=1;sp|P49753|ACOT2_HUMAN Acyl-coenzyme A thioesterase 2, mitochondrial OS=Homo sapi	3	1	1	1	0	0	1	1	0	0	1	1	0	0	0	0	1	0	0	0	0	0	1	1	0	0	1	1	0	0	0	0	1	0	0	0	0	0	1	1	0	0
P49754	P49754	1	1	1	Vacuolar protein sorting-associated protein 41 homolog	VPS41	sp|P49754|VPS41_HUMAN Vacuolar protein sorting-associated protein 41 homolog OS=Homo sapiens GN=VPS41 PE=1 SV=3	1	1	1	1	1	1	1	1	0	0	1	0	1	1	0	0	0	0	1	0	1	1	1	1	0	0	1	0	1	1	0	0	0	0	1	0	1	1	1	1	0	0
P49755	P49755	2	2	2	Transmembrane emp24 domain-containing protein 10	TMED10	sp|P49755|TMEDA_HUMAN Transmembrane emp24 domain-containing protein 10 OS=Homo sapiens GN=TMED10 PE=1 SV=2	1	2	2	2	2	1	1	1	1	0	0	1	0	0	1	1	1	1	1	0	2	1	1	1	1	0	0	1	0	0	1	1	1	1	1	0	2	1	1	1	1	0
P49756	P49756	7	7	7	RNA-binding protein 25	RBM25	sp|P49756|RBM25_HUMAN RNA-binding protein 25 OS=Homo sapiens GN=RBM25 PE=1 SV=3	1	7	7	7	4	4	3	3	4	2	4	3	3	5	2	2	4	5	3	1	4	4	3	3	4	2	4	3	3	5	2	2	4	5	3	1	4	4	3	3	4	2
P49757	P49757	2	2	2	Protein numb homolog	NUMB	sp|P49757|NUMB_HUMAN Protein numb homolog OS=Homo sapiens GN=NUMB PE=1 SV=2	1	2	2	2	1	0	0	1	0	0	2	1	2	0	0	0	1	0	0	0	1	0	0	1	0	0	2	1	2	0	0	0	1	0	0	0	1	0	0	1	0	0
P49768	P49768	3	3	3	Presenilin-1;Presenilin-1 NTF subunit;Presenilin-1 CTF subunit;Presenilin-1 CTF12	PSEN1	sp|P49768|PSN1_HUMAN Presenilin-1 OS=Homo sapiens GN=PSEN1 PE=1 SV=1	1	3	3	3	2	1	0	1	3	1	1	2	1	1	3	2	1	0	1	1	2	1	0	1	3	1	1	2	1	1	3	2	1	0	1	1	2	1	0	1	3	1
P49773	P49773	3	3	3	Histidine triad nucleotide-binding protein 1	HINT1	sp|P49773|HINT1_HUMAN Histidine triad nucleotide-binding protein 1 OS=Homo sapiens GN=HINT1 PE=1 SV=2	1	3	3	3	0	0	0	0	0	0	0	3	0	1	0	0	0	2	0	0	0	0	0	0	0	0	0	3	0	1	0	0	0	2	0	0	0	0	0	0	0	0
P49790	P49790	14	14	14	Nuclear pore complex protein Nup153	NUP153	sp|P49790|NU153_HUMAN Nuclear pore complex protein Nup153 OS=Homo sapiens GN=NUP153 PE=1 SV=2	1	14	14	14	3	3	4	5	3	2	6	5	5	4	1	2	5	5	2	1	3	3	4	5	3	2	6	5	5	4	1	2	5	5	2	1	3	3	4	5	3	2
P49792;P0DJD0;Q7Z3J3;P0DJD1	P49792	33;6;6;5	33;6;6;5	26;2;0;2	E3 SUMO-protein ligase RanBP2	RANBP2	sp|P49792|RBP2_HUMAN E3 SUMO-protein ligase RanBP2 OS=Homo sapiens GN=RANBP2 PE=1 SV=2	4	33	33	26	16	17	16	18	10	10	19	12	13	17	11	10	14	11	13	4	16	17	16	18	10	10	19	12	13	17	11	10	14	11	13	4	15	15	14	15	9	9
P49815	P49815	2	2	2	Tuberin	TSC2	sp|P49815|TSC2_HUMAN Tuberin OS=Homo sapiens GN=TSC2 PE=1 SV=2	1	2	2	2	2	1	2	2	1	0	2	0	2	1	1	1	1	0	2	0	2	1	2	2	1	0	2	0	2	1	1	1	1	0	2	0	2	1	2	2	1	0
P49821	P49821	4	4	4	NADH dehydrogenase [ubiquinone] flavoprotein 1, mitochondrial	NDUFV1	sp|P49821|NDUV1_HUMAN NADH dehydrogenase [ubiquinone] flavoprotein 1, mitochondrial OS=Homo sapiens GN=NDUFV1 PE=1 SV=4	1	4	4	4	3	1	2	1	0	0	3	2	1	1	1	0	1	3	1	0	3	1	2	1	0	0	3	2	1	1	1	0	1	3	1	0	3	1	2	1	0	0
P49840	P49840	4	4	4	Glycogen synthase kinase-3 alpha	GSK3A	sp|P49840|GSK3A_HUMAN Glycogen synthase kinase-3 alpha OS=Homo sapiens GN=GSK3A PE=1 SV=2	1	4	4	4	2	2	1	1	0	1	2	2	1	1	2	1	1	2	1	0	2	2	1	1	0	1	2	2	1	1	2	1	1	2	1	0	2	2	1	1	0	1
P49841	P49841	3	3	3	Glycogen synthase kinase-3 beta	GSK3B	sp|P49841|GSK3B_HUMAN Glycogen synthase kinase-3 beta OS=Homo sapiens GN=GSK3B PE=1 SV=2	1	3	3	3	1	2	2	2	1	1	2	3	2	2	1	1	2	1	1	0	1	2	2	2	1	1	2	3	2	2	1	1	2	1	1	0	1	2	2	2	1	1
P49848	P49848	3	3	3	Transcription initiation factor TFIID subunit 6	TAF6	sp|P49848|TAF6_HUMAN Transcription initiation factor TFIID subunit 6 OS=Homo sapiens GN=TAF6 PE=1 SV=1	1	3	3	3	1	1	1	0	0	0	0	0	3	2	0	0	0	0	0	0	1	1	1	0	0	0	0	0	3	2	0	0	0	0	0	0	1	1	1	0	0	0
P49902	P49902	3	3	3	Cytosolic purine 5-nucleotidase	NT5C2	sp|P49902|5NTC_HUMAN Cytosolic purine 5-nucleotidase OS=Homo sapiens GN=NT5C2 PE=1 SV=1	1	3	3	3	1	1	3	2	0	0	2	2	2	2	0	0	1	0	0	0	1	1	3	2	0	0	2	2	2	2	0	0	1	0	0	0	1	1	3	2	0	0
P49903	P49903	1	1	1	Selenide, water dikinase 1	SEPHS1	sp|P49903|SPS1_HUMAN Selenide, water dikinase 1 OS=Homo sapiens GN=SEPHS1 PE=1 SV=2	1	1	1	1	0	0	0	0	0	0	0	1	0	0	0	0	0	0	0	0	0	0	0	0	0	0	0	1	0	0	0	0	0	0	0	0	0	0	0	0	0	0
P49915	P49915	6	6	6	GMP synthase [glutamine-hydrolyzing]	GMPS	sp|P49915|GUAA_HUMAN GMP synthase [glutamine-hydrolyzing] OS=Homo sapiens GN=GMPS PE=1 SV=1	1	6	6	6	5	3	3	3	3	3	6	4	4	4	2	2	4	1	2	1	5	3	3	3	3	3	6	4	4	4	2	2	4	1	2	1	5	3	3	3	3	3
P49916	P49916	2	2	2	DNA ligase 3	LIG3	sp|P49916|DNLI3_HUMAN DNA ligase 3 OS=Homo sapiens GN=LIG3 PE=1 SV=2	1	2	2	2	2	0	1	1	0	0	1	0	1	1	1	0	1	0	1	0	2	0	1	1	0	0	1	0	1	1	1	0	1	0	1	0	2	0	1	1	0	0
P49959	P49959	4	4	4	Double-strand break repair protein MRE11A	MRE11A	sp|P49959|MRE11_HUMAN Double-strand break repair protein MRE11A OS=Homo sapiens GN=MRE11A PE=1 SV=3	1	4	4	4	2	0	1	1	0	0	0	1	1	2	0	1	1	2	1	0	2	0	1	1	0	0	0	1	1	2	0	1	1	2	1	0	2	0	1	1	0	0
P50148	P50148	2	1	1	Guanine nucleotide-binding protein G(q) subunit alpha	GNAQ	sp|P50148|GNAQ_HUMAN Guanine nucleotide-binding protein G(q) subunit alpha OS=Homo sapiens GN=GNAQ PE=1 SV=4	1	2	1	1	0	1	0	1	0	1	1	2	0	0	0	0	0	1	0	1	0	1	0	1	0	1	0	1	0	0	0	0	0	0	0	0	0	1	0	1	0	1
P50213	P50213	1	1	1	Isocitrate dehydrogenase [NAD] subunit alpha, mitochondrial	IDH3A	sp|P50213|IDH3A_HUMAN Isocitrate dehydrogenase [NAD] subunit alpha, mitochondrial OS=Homo sapiens GN=IDH3A PE=1 SV=1	1	1	1	1	0	0	1	0	0	0	0	0	0	0	1	1	1	1	1	0	0	0	1	0	0	0	0	0	0	0	1	1	1	1	1	0	0	0	1	0	0	0
P50336	P50336	1	1	1	Protoporphyrinogen oxidase	PPOX	sp|P50336|PPOX_HUMAN Protoporphyrinogen oxidase OS=Homo sapiens GN=PPOX PE=1 SV=1	1	1	1	1	0	0	0	1	0	0	1	1	1	1	0	0	0	0	0	0	0	0	0	1	0	0	1	1	1	1	0	0	0	0	0	0	0	0	0	1	0	0
P50395	P50395	4	2	2	Rab GDP dissociation inhibitor beta	GDI2	sp|P50395|GDIB_HUMAN Rab GDP dissociation inhibitor beta OS=Homo sapiens GN=GDI2 PE=1 SV=2	1	4	2	2	4	2	3	3	3	3	3	2	4	4	1	2	2	2	2	2	2	1	2	2	2	1	2	1	2	2	0	0	0	0	1	0	2	1	2	2	2	1
P50402	P50402	7	7	7	Emerin	EMD	sp|P50402|EMD_HUMAN Emerin OS=Homo sapiens GN=EMD PE=1 SV=1	1	7	7	7	6	4	2	2	2	3	2	3	3	2	1	2	4	3	2	1	6	4	2	2	2	3	2	3	3	2	1	2	4	3	2	1	6	4	2	2	2	3
P50443	P50443	2	2	2	Sulfate transporter	SLC26A2	sp|P50443|S26A2_HUMAN Sulfate transporter OS=Homo sapiens GN=SLC26A2 PE=1 SV=2	1	2	2	2	0	0	0	0	0	0	0	1	0	0	0	0	0	0	1	0	0	0	0	0	0	0	0	1	0	0	0	0	0	0	1	0	0	0	0	0	0	0
P50452	P50452	1	1	1	Serpin B8	SERPINB8	sp|P50452|SPB8_HUMAN Serpin B8 OS=Homo sapiens GN=SERPINB8 PE=1 SV=2	1	1	1	1	0	0	0	0	0	1	0	1	0	0	0	0	1	1	1	0	0	0	0	0	0	1	0	1	0	0	0	0	1	1	1	0	0	0	0	0	0	1
P50454	P50454	5	5	5	Serpin H1	SERPINH1	sp|P50454|SERPH_HUMAN Serpin H1 OS=Homo sapiens GN=SERPINH1 PE=1 SV=2	1	5	5	5	3	2	3	2	1	3	1	3	2	4	3	2	2	3	2	0	3	2	3	2	1	3	1	3	2	4	3	2	2	3	2	0	3	2	3	2	1	3
P50502	P50502	2	2	2	Hsc70-interacting protein	ST13	sp|P50502|F10A1_HUMAN Hsc70-interacting protein OS=Homo sapiens GN=ST13 PE=1 SV=2	1	2	2	2	1	1	1	1	1	0	2	2	0	1	1	1	1	1	0	0	1	1	1	1	1	0	2	2	0	1	1	1	1	1	0	0	1	1	1	1	1	0
P50542	P50542	2	2	2	Peroxisomal targeting signal 1 receptor	PEX5	sp|P50542|PEX5_HUMAN Peroxisomal targeting signal 1 receptor OS=Homo sapiens GN=PEX5 PE=1 SV=3	1	2	2	2	0	0	0	1	0	0	1	0	1	1	0	0	0	0	0	0	0	0	0	1	0	0	1	0	1	1	0	0	0	0	0	0	0	0	0	1	0	0
P50548	P50548	1	1	1	ETS domain-containing transcription factor ERF	ERF	sp|P50548|ERF_HUMAN ETS domain-containing transcription factor ERF OS=Homo sapiens GN=ERF PE=1 SV=2	1	1	1	1	0	0	1	0	0	0	1	0	1	0	0	0	1	0	1	0	0	0	1	0	0	0	1	0	1	0	0	0	1	0	1	0	0	0	1	0	0	0
P50552	P50552	1	1	1	Vasodilator-stimulated phosphoprotein	VASP	sp|P50552|VASP_HUMAN Vasodilator-stimulated phosphoprotein OS=Homo sapiens GN=VASP PE=1 SV=3	1	1	1	1	1	1	1	1	1	1	1	1	1	1	1	1	1	0	1	0	1	1	1	1	1	1	1	1	1	1	1	1	1	0	1	0	1	1	1	1	1	1
P50570	P50570	6	6	6	Dynamin-2	DNM2	sp|P50570|DYN2_HUMAN Dynamin-2 OS=Homo sapiens GN=DNM2 PE=1 SV=2	1	6	6	6	3	4	2	3	4	3	4	4	3	5	2	2	3	1	0	0	3	4	2	3	4	3	4	4	3	5	2	2	3	1	0	0	3	4	2	3	4	3
P50579	P50579	4	4	4	Methionine aminopeptidase 2	METAP2	sp|P50579|MAP2_HUMAN Methionine aminopeptidase 2 OS=Homo sapiens GN=METAP2 PE=1 SV=1	1	4	4	4	2	2	2	3	2	2	2	1	2	2	2	3	2	1	2	1	2	2	2	3	2	2	2	1	2	2	2	3	2	1	2	1	2	2	2	3	2	2
P50583	P50583	1	1	1	Bis(5-nucleosyl)-tetraphosphatase [asymmetrical]	NUDT2	sp|P50583|AP4A_HUMAN Bis(5-nucleosyl)-tetraphosphatase [asymmetrical] OS=Homo sapiens GN=NUDT2 PE=1 SV=3	1	1	1	1	0	0	0	0	0	0	0	1	0	0	0	0	0	0	0	1	0	0	0	0	0	0	0	1	0	0	0	0	0	0	0	1	0	0	0	0	0	0
P50613	P50613	1	1	1	Cyclin-dependent kinase 7	CDK7	sp|P50613|CDK7_HUMAN Cyclin-dependent kinase 7 OS=Homo sapiens GN=CDK7 PE=1 SV=1	1	1	1	1	1	0	1	1	0	1	1	0	1	1	0	0	1	0	0	0	1	0	1	1	0	1	1	0	1	1	0	0	1	0	0	0	1	0	1	1	0	1
P50748	P50748	3	3	2	Kinetochore-associated protein 1	KNTC1	sp|P50748|KNTC1_HUMAN Kinetochore-associated protein 1 OS=Homo sapiens GN=KNTC1 PE=1 SV=1	1	3	3	2	1	1	2	0	0	0	2	1	0	0	0	1	0	0	1	0	1	1	2	0	0	0	2	1	0	0	0	1	0	0	1	0	1	1	2	0	0	0
P50750	P50750	2	2	2	Cyclin-dependent kinase 9	CDK9	sp|P50750|CDK9_HUMAN Cyclin-dependent kinase 9 OS=Homo sapiens GN=CDK9 PE=1 SV=3	1	2	2	2	1	0	0	1	0	0	0	0	1	2	0	0	1	0	1	0	1	0	0	1	0	0	0	0	1	2	0	0	1	0	1	0	1	0	0	1	0	0
P50851	P50851	5	5	5	Lipopolysaccharide-responsive and beige-like anchor protein	LRBA	sp|P50851|LRBA_HUMAN Lipopolysaccharide-responsive and beige-like anchor protein OS=Homo sapiens GN=LRBA PE=1 SV=4	1	5	5	5	1	2	0	1	0	0	0	0	3	2	0	0	0	0	0	0	1	2	0	1	0	0	0	0	3	2	0	0	0	0	0	0	1	2	0	1	0	0
P50895	P50895	3	3	3	Basal cell adhesion molecule	BCAM	sp|P50895|BCAM_HUMAN Basal cell adhesion molecule OS=Homo sapiens GN=BCAM PE=1 SV=2	1	3	3	3	1	1	1	2	0	0	1	0	2	3	0	0	1	0	1	0	1	1	1	2	0	0	1	0	2	3	0	0	1	0	1	0	1	1	1	2	0	0
P50897	P50897	3	3	3	Palmitoyl-protein thioesterase 1	PPT1	sp|P50897|PPT1_HUMAN Palmitoyl-protein thioesterase 1 OS=Homo sapiens GN=PPT1 PE=1 SV=1	1	3	3	3	0	2	2	2	2	1	2	2	2	1	1	2	3	3	1	0	0	2	2	2	2	1	2	2	2	1	1	2	3	3	1	0	0	2	2	2	2	1
P50990	P50990	5	5	5	T-complex protein 1 subunit theta	CCT8	sp|P50990|TCPQ_HUMAN T-complex protein 1 subunit theta OS=Homo sapiens GN=CCT8 PE=1 SV=4	1	5	5	5	3	2	3	3	1	0	3	4	3	2	1	0	3	4	2	3	3	2	3	3	1	0	3	4	3	2	1	0	3	4	2	3	3	2	3	3	1	0
P50991	P50991	6	6	6	T-complex protein 1 subunit delta	CCT4	sp|P50991|TCPD_HUMAN T-complex protein 1 subunit delta OS=Homo sapiens GN=CCT4 PE=1 SV=4	1	6	6	6	3	2	3	4	3	2	5	4	5	5	2	2	3	4	1	0	3	2	3	4	3	2	5	4	5	5	2	2	3	4	1	0	3	2	3	4	3	2
P50995	P50995	1	1	1	Annexin A11	ANXA11	sp|P50995|ANX11_HUMAN Annexin A11 OS=Homo sapiens GN=ANXA11 PE=1 SV=1	1	1	1	1	0	0	0	0	0	0	0	1	0	0	0	0	0	0	0	0	0	0	0	0	0	0	0	1	0	0	0	0	0	0	0	0	0	0	0	0	0	0
P51003	P51003	2	2	2	Poly(A) polymerase alpha	PAPOLA	sp|P51003|PAPOA_HUMAN Poly(A) polymerase alpha OS=Homo sapiens GN=PAPOLA PE=1 SV=4	1	2	2	2	1	0	0	1	1	0	1	0	0	1	1	0	0	0	1	0	1	0	0	1	1	0	1	0	0	1	1	0	0	0	1	0	1	0	0	1	1	0
P51114	P51114	7	7	7	Fragile X mental retardation syndrome-related protein 1	FXR1	sp|P51114|FXR1_HUMAN Fragile X mental retardation syndrome-related protein 1 OS=Homo sapiens GN=FXR1 PE=1 SV=3	1	7	7	7	4	2	2	2	1	2	2	2	4	2	2	3	2	4	2	0	4	2	2	2	1	2	2	2	4	2	2	3	2	4	2	0	4	2	2	2	1	2
P51116	P51116	5	5	5	Fragile X mental retardation syndrome-related protein 2	FXR2	sp|P51116|FXR2_HUMAN Fragile X mental retardation syndrome-related protein 2 OS=Homo sapiens GN=FXR2 PE=1 SV=2	1	5	5	5	3	2	4	2	1	1	2	1	2	1	1	1	1	1	2	0	3	2	4	2	1	1	2	1	2	1	1	1	1	1	2	0	3	2	4	2	1	1
P51148	P51148	4	4	4	Ras-related protein Rab-5C	RAB5C	sp|P51148|RAB5C_HUMAN Ras-related protein Rab-5C OS=Homo sapiens GN=RAB5C PE=1 SV=2	1	4	4	4	2	2	2	1	0	0	3	2	1	1	0	0	1	2	1	0	2	2	2	1	0	0	3	2	1	1	0	0	1	2	1	0	2	2	2	1	0	0
P51149	P51149	2	2	2	Ras-related protein Rab-7a	RAB7A	sp|P51149|RAB7A_HUMAN Ras-related protein Rab-7a OS=Homo sapiens GN=RAB7A PE=1 SV=1	1	2	2	2	2	2	2	2	2	2	2	1	2	2	2	2	2	2	1	2	2	2	2	2	2	2	2	1	2	2	2	2	2	2	1	2	2	2	2	2	2	2
P51151	P51151	1	1	1	Ras-related protein Rab-9A	RAB9A	sp|P51151|RAB9A_HUMAN Ras-related protein Rab-9A OS=Homo sapiens GN=RAB9A PE=1 SV=1	1	1	1	1	0	1	0	0	0	0	0	1	0	0	0	0	0	0	0	0	0	1	0	0	0	0	0	1	0	0	0	0	0	0	0	0	0	1	0	0	0	0
P51153	P51153	1	1	1	Ras-related protein Rab-13	RAB13	sp|P51153|RAB13_HUMAN Ras-related protein Rab-13 OS=Homo sapiens GN=RAB13 PE=1 SV=1	1	1	1	1	1	1	1	1	1	1	1	1	1	1	1	0	1	1	1	1	1	1	1	1	1	1	1	1	1	1	1	0	1	1	1	1	1	1	1	1	1	1
P51159	P51159	1	1	1	Ras-related protein Rab-27A	RAB27A	sp|P51159|RB27A_HUMAN Ras-related protein Rab-27A OS=Homo sapiens GN=RAB27A PE=1 SV=3	1	1	1	1	0	1	0	0	0	0	0	1	0	0	0	0	0	0	0	0	0	1	0	0	0	0	0	1	0	0	0	0	0	0	0	0	0	1	0	0	0	0
P51178	P51178	1	1	1	1-phosphatidylinositol 4,5-bisphosphate phosphodiesterase delta-1	PLCD1	sp|P51178|PLCD1_HUMAN 1-phosphatidylinositol 4,5-bisphosphate phosphodiesterase delta-1 OS=Homo sapiens GN=PLCD1 PE=1 SV=2	1	1	1	1	0	0	1	1	0	0	0	0	0	1	0	0	1	0	0	0	0	0	1	1	0	0	0	0	0	1	0	0	1	0	0	0	0	0	1	1	0	0
P51398	P51398	1	1	1	28S ribosomal protein S29, mitochondrial	DAP3	sp|P51398|RT29_HUMAN 28S ribosomal protein S29, mitochondrial OS=Homo sapiens GN=DAP3 PE=1 SV=1	1	1	1	1	1	1	1	1	1	1	1	1	1	1	1	1	0	1	1	0	1	1	1	1	1	1	1	1	1	1	1	1	0	1	1	0	1	1	1	1	1	1
P51452	P51452	2	2	2	Dual specificity protein phosphatase 3	DUSP3	sp|P51452|DUS3_HUMAN Dual specificity protein phosphatase 3 OS=Homo sapiens GN=DUSP3 PE=1 SV=1	1	2	2	2	1	1	2	1	1	1	2	2	2	2	1	0	2	2	1	0	1	1	2	1	1	1	2	2	2	2	1	0	2	2	1	0	1	1	2	1	1	1
P51531	P51531	3	3	3	Probable global transcription activator SNF2L2	SMARCA2	sp|P51531|SMCA2_HUMAN Probable global transcription activator SNF2L2 OS=Homo sapiens GN=SMARCA2 PE=1 SV=2	1	3	3	3	1	1	1	0	0	0	2	1	1	1	0	0	1	1	1	0	1	1	1	0	0	0	2	1	1	1	0	0	1	1	1	0	1	1	1	0	0	0
P51532	P51532	5	5	5	Transcription activator BRG1	SMARCA4	sp|P51532|SMCA4_HUMAN Transcription activator BRG1 OS=Homo sapiens GN=SMARCA4 PE=1 SV=2	1	5	5	5	2	0	0	0	0	0	2	1	1	1	0	0	0	1	1	0	2	0	0	0	0	0	2	1	1	1	0	0	0	1	1	0	2	0	0	0	0	0
P51553	P51553	2	2	2	Isocitrate dehydrogenase [NAD] subunit gamma, mitochondrial	IDH3G	sp|P51553|IDH3G_HUMAN Isocitrate dehydrogenase [NAD] subunit gamma, mitochondrial OS=Homo sapiens GN=IDH3G PE=1 SV=1	1	2	2	2	1	1	1	2	0	0	2	1	2	1	1	0	2	1	1	0	1	1	1	2	0	0	2	1	2	1	1	0	2	1	1	0	1	1	1	2	0	0
P51570	P51570	4	4	4	Galactokinase	GALK1	sp|P51570|GALK1_HUMAN Galactokinase OS=Homo sapiens GN=GALK1 PE=1 SV=1	1	4	4	4	0	0	0	0	1	0	2	2	3	2	0	0	1	0	1	0	0	0	0	0	1	0	2	2	3	2	0	0	1	0	1	0	0	0	0	0	1	0
P51571	P51571	2	2	2	Translocon-associated protein subunit delta	SSR4	sp|P51571|SSRD_HUMAN Translocon-associated protein subunit delta OS=Homo sapiens GN=SSR4 PE=1 SV=1	1	2	2	2	1	1	1	1	2	1	1	1	1	1	2	2	1	1	1	1	1	1	1	1	2	1	1	1	1	1	2	2	1	1	1	1	1	1	1	1	2	1
P51572	P51572	1	1	1	B-cell receptor-associated protein 31	BCAP31	sp|P51572|BAP31_HUMAN B-cell receptor-associated protein 31 OS=Homo sapiens GN=BCAP31 PE=1 SV=3	1	1	1	1	1	1	0	1	0	0	0	0	0	0	0	0	1	0	0	0	1	1	0	1	0	0	0	0	0	0	0	0	1	0	0	0	1	1	0	1	0	0
P51580	P51580	1	1	1	Thiopurine S-methyltransferase	TPMT	sp|P51580|TPMT_HUMAN Thiopurine S-methyltransferase OS=Homo sapiens GN=TPMT PE=1 SV=1	1	1	1	1	0	0	1	0	0	0	1	0	0	0	0	0	0	0	0	0	0	0	1	0	0	0	1	0	0	0	0	0	0	0	0	0	0	0	1	0	0	0
P51608	P51608	2	2	2	Methyl-CpG-binding protein 2	MECP2	sp|P51608|MECP2_HUMAN Methyl-CpG-binding protein 2 OS=Homo sapiens GN=MECP2 PE=1 SV=1	1	2	2	2	1	2	1	2	0	0	1	0	1	1	0	1	1	0	0	0	1	2	1	2	0	0	1	0	1	1	0	1	1	0	0	0	1	2	1	2	0	0
P51610	P51610	10	10	10	Host cell factor 1;HCF N-terminal chain 1;HCF N-terminal chain 2;HCF N-terminal chain 3;HCF N-terminal chain 4;HCF N-terminal chain 5;HCF N-terminal chain 6;HCF C-terminal chain 1;HCF C-terminal chain 2;HCF C-terminal chain 3;HCF C-terminal chain 4;HCF C-terminal chain 5;HCF C-terminal chain 6	HCFC1	sp|P51610|HCFC1_HUMAN Host cell factor 1 OS=Homo sapiens GN=HCFC1 PE=1 SV=2	1	10	10	10	6	5	2	4	4	2	3	5	7	5	1	4	4	2	3	0	6	5	2	4	4	2	3	5	7	5	1	4	4	2	3	0	6	5	2	4	4	2
P51617	P51617	2	2	2	Interleukin-1 receptor-associated kinase 1	IRAK1	sp|P51617|IRAK1_HUMAN Interleukin-1 receptor-associated kinase 1 OS=Homo sapiens GN=IRAK1 PE=1 SV=2	1	2	2	2	0	0	1	0	0	0	0	1	1	1	0	0	0	0	0	0	0	0	1	0	0	0	0	1	1	1	0	0	0	0	0	0	0	0	1	0	0	0
P51648	P51648	2	2	2	Fatty aldehyde dehydrogenase	ALDH3A2	sp|P51648|AL3A2_HUMAN Fatty aldehyde dehydrogenase OS=Homo sapiens GN=ALDH3A2 PE=1 SV=1	1	2	2	2	0	0	0	0	1	0	0	1	0	0	1	0	1	0	0	0	0	0	0	0	1	0	0	1	0	0	1	0	1	0	0	0	0	0	0	0	1	0
P51659	P51659	7	7	7	Peroxisomal multifunctional enzyme type 2;(3R)-hydroxyacyl-CoA dehydrogenase;Enoyl-CoA hydratase 2	HSD17B4	sp|P51659|DHB4_HUMAN Peroxisomal multifunctional enzyme type 2 OS=Homo sapiens GN=HSD17B4 PE=1 SV=3	1	7	7	7	5	4	6	6	5	5	4	4	2	4	4	4	5	4	4	3	5	4	6	6	5	5	4	4	2	4	4	4	5	4	4	3	5	4	6	6	5	5
P51665	P51665	4	4	4	26S proteasome non-ATPase regulatory subunit 7	PSMD7	sp|P51665|PSMD7_HUMAN 26S proteasome non-ATPase regulatory subunit 7 OS=Homo sapiens GN=PSMD7 PE=1 SV=2	1	4	4	4	1	3	1	1	1	2	0	2	2	3	0	0	3	2	3	1	1	3	1	1	1	2	0	2	2	3	0	0	3	2	3	1	1	3	1	1	1	2
P51668	P51668	1	1	1	Ubiquitin-conjugating enzyme E2 D1	UBE2D1	sp|P51668|UB2D1_HUMAN Ubiquitin-conjugating enzyme E2 D1 OS=Homo sapiens GN=UBE2D1 PE=1 SV=1	1	1	1	1	0	1	1	0	0	0	1	1	1	1	0	0	0	0	0	0	0	1	1	0	0	0	1	1	1	1	0	0	0	0	0	0	0	1	1	0	0	0
P51689	P51689	1	1	1	Arylsulfatase D	ARSD	sp|P51689|ARSD_HUMAN Arylsulfatase D OS=Homo sapiens GN=ARSD PE=1 SV=2	1	1	1	1	0	0	0	1	0	0	0	0	1	0	0	0	0	0	0	0	0	0	0	1	0	0	0	0	1	0	0	0	0	0	0	0	0	0	0	1	0	0
P51784	P51784	7	7	7	Ubiquitin carboxyl-terminal hydrolase 11	USP11	sp|P51784|UBP11_HUMAN Ubiquitin carboxyl-terminal hydrolase 11 OS=Homo sapiens GN=USP11 PE=1 SV=3	1	7	7	7	3	4	3	3	0	0	1	3	4	5	0	1	1	3	2	0	3	4	3	3	0	0	1	3	4	5	0	1	1	3	2	0	3	4	3	3	0	0
P51790	P51790	1	1	1	H(+)/Cl(-) exchange transporter 3	CLCN3	sp|P51790|CLCN3_HUMAN H(+)/Cl(-) exchange transporter 3 OS=Homo sapiens GN=CLCN3 PE=1 SV=2	1	1	1	1	0	0	0	0	1	0	0	0	1	1	1	1	1	0	0	0	0	0	0	0	1	0	0	0	1	1	1	1	1	0	0	0	0	0	0	0	1	0
P51798	P51798	4	4	4	H(+)/Cl(-) exchange transporter 7	CLCN7	sp|P51798|CLCN7_HUMAN H(+)/Cl(-) exchange transporter 7 OS=Homo sapiens GN=CLCN7 PE=1 SV=2	1	4	4	4	1	2	3	2	1	1	2	2	2	1	1	1	0	1	0	0	1	2	3	2	1	1	2	2	2	1	1	1	0	1	0	0	1	2	3	2	1	1
P51808	P51808	2	2	2	Dynein light chain Tctex-type 3	DYNLT3	sp|P51808|DYLT3_HUMAN Dynein light chain Tctex-type 3 OS=Homo sapiens GN=DYNLT3 PE=1 SV=1	1	2	2	2	1	0	1	1	0	0	1	0	1	2	0	0	1	0	0	0	1	0	1	1	0	0	1	0	1	2	0	0	1	0	0	0	1	0	1	1	0	0
P51809	P51809	1	1	1	Vesicle-associated membrane protein 7	VAMP7	sp|P51809|VAMP7_HUMAN Vesicle-associated membrane protein 7 OS=Homo sapiens GN=VAMP7 PE=1 SV=3	1	1	1	1	0	1	0	0	0	0	0	1	0	0	0	0	0	1	0	0	0	1	0	0	0	0	0	1	0	0	0	0	0	1	0	0	0	1	0	0	0	0
P51858	P51858	4	4	4	Hepatoma-derived growth factor	HDGF	sp|P51858|HDGF_HUMAN Hepatoma-derived growth factor OS=Homo sapiens GN=HDGF PE=1 SV=1	1	4	4	4	3	2	4	4	2	2	4	2	4	4	2	2	2	2	1	0	3	2	4	4	2	2	4	2	4	4	2	2	2	2	1	0	3	2	4	4	2	2
P51911	P51911	2	2	2	Calponin-1	CNN1	sp|P51911|CNN1_HUMAN Calponin-1 OS=Homo sapiens GN=CNN1 PE=1 SV=2	1	2	2	2	1	1	0	1	1	1	2	2	1	1	1	1	2	1	0	0	1	1	0	1	1	1	2	2	1	1	1	1	2	1	0	0	1	1	0	1	1	1
P51946	P51946	2	2	2	Cyclin-H	CCNH	sp|P51946|CCNH_HUMAN Cyclin-H OS=Homo sapiens GN=CCNH PE=1 SV=1	1	2	2	2	0	1	0	0	0	0	0	0	1	1	0	0	0	0	0	0	0	1	0	0	0	0	0	0	1	1	0	0	0	0	0	0	0	1	0	0	0	0
P51948	P51948	2	2	2	CDK-activating kinase assembly factor MAT1	MNAT1	sp|P51948|MAT1_HUMAN CDK-activating kinase assembly factor MAT1 OS=Homo sapiens GN=MNAT1 PE=1 SV=1	1	2	2	2	1	1	0	0	1	1	1	1	1	1	1	1	2	2	1	0	1	1	0	0	1	1	1	1	1	1	1	1	2	2	1	0	1	1	0	0	1	1
P51956	P51956	1	1	1	Serine/threonine-protein kinase Nek3	NEK3	sp|P51956|NEK3_HUMAN Serine/threonine-protein kinase Nek3 OS=Homo sapiens GN=NEK3 PE=1 SV=2	1	1	1	1	0	0	1	1	0	0	0	0	1	1	0	0	0	0	0	0	0	0	1	1	0	0	0	0	1	1	0	0	0	0	0	0	0	0	1	1	0	0
P51970	P51970	3	3	3	NADH dehydrogenase [ubiquinone] 1 alpha subcomplex subunit 8	NDUFA8	sp|P51970|NDUA8_HUMAN NADH dehydrogenase [ubiquinone] 1 alpha subcomplex subunit 8 OS=Homo sapiens GN=NDUFA8 PE=1 SV=3	1	3	3	3	2	2	2	1	1	0	1	2	2	1	1	1	2	2	2	0	2	2	2	1	1	0	1	2	2	1	1	1	2	2	2	0	2	2	2	1	1	0
P51991	P51991	3	3	3	Heterogeneous nuclear ribonucleoprotein A3	HNRNPA3	sp|P51991|ROA3_HUMAN Heterogeneous nuclear ribonucleoprotein A3 OS=Homo sapiens GN=HNRNPA3 PE=1 SV=2	1	3	3	3	2	2	2	2	1	1	2	3	2	2	1	1	2	2	2	1	2	2	2	2	1	1	2	3	2	2	1	1	2	2	2	1	2	2	2	2	1	1
P52209	P52209	7	7	7	6-phosphogluconate dehydrogenase, decarboxylating	PGD	sp|P52209|6PGD_HUMAN 6-phosphogluconate dehydrogenase, decarboxylating OS=Homo sapiens GN=PGD PE=1 SV=3	1	7	7	7	7	7	7	6	4	4	7	7	7	7	1	3	6	5	2	2	7	7	7	6	4	4	7	7	7	7	1	3	6	5	2	2	7	7	7	6	4	4
P52272	P52272	8	8	7	Heterogeneous nuclear ribonucleoprotein M	HNRNPM	sp|P52272|HNRPM_HUMAN Heterogeneous nuclear ribonucleoprotein M OS=Homo sapiens GN=HNRNPM PE=1 SV=3	1	8	8	7	5	5	3	4	1	3	4	4	5	2	2	1	3	5	3	2	5	5	3	4	1	3	4	4	5	2	2	1	3	5	3	2	5	5	3	4	1	3
P52292	P52292	10	10	10	Importin subunit alpha-1	KPNA2	sp|P52292|IMA1_HUMAN Importin subunit alpha-1 OS=Homo sapiens GN=KPNA2 PE=1 SV=1	1	10	10	10	9	8	8	9	5	5	8	10	8	9	5	5	8	7	4	1	9	8	8	9	5	5	8	10	8	9	5	5	8	7	4	1	9	8	8	9	5	5
[truncated: 3,453 more rows]
[truncated: 96 more columns]

## Sheet: venn
															Only Control	Only treated	Common Genes
															GDAP2	RNF5	ACTB
															NAA10	DAAM1	VIM
															CCNL1	NCOA5	TUBA1B
															PIGG	SMNDC1	FLNC
															AUP1	SGCB	FLNA
															UBE2K	MARC2	MYH9
[truncated: 4,324 more rows]

## Sheet: summary
Log2 (x) LFQ Intencity ± SD Control	Log2 (x) LFQ Intencity ± SD Treated	Unique peptides	Majority protein IDs	Protein names	Gene names	T-test Significant	p-value	Difference
[truncated: 4,919 more rows]

[truncated: 1 more sheets: top lists]
